# Supplementary material for: Uncovering DNA-PKcs ancient phylogeny, unique sequence motifs and insights for human disease
Source: PubMed Central journal article supplement — Prog Biophys Mol Biol. Author manuscript; Available in PMC 2022 Aug 1. (PMC8021618; doi:10.1016/j.pbiomolbio.2020.09.010), 2020-10-06

**Supplementary Figure 2:** Results of CLUSTAL OMEGA alignment of DNA-PKcs sequences from selected vertebrate and invertebrate species. DNA-PKcs amino acid sequences from the organisms listed below were analyzed by CLUSTAL OMEGA using the default settings.

A. The percent amino acid identity for each sequence in the alignment (from Clustal Omega).

B. Alignment of DNA-PKcs sequences. \* represents identical amino acids (indicated in blue/bold), : represents conservative substitution (indicated in blue) and . represents amino acid similarity, indicated in purple. Unassigned amino acids are indicated by X. Major domains and regions of interest are indicated beneath the alignments. The conserved DXXXXN and DFG motifs in the kinase domain are shown in red/bold. The human sequence is highlighted in yellow. For additional information on sequences and phyla please see Supplementary Table 1.

A.

| Sequence    | Percent ID |
|-------------|------------|
| HUMAN       | 100        |
| PLATYPUS    | 75.07      |
| TURTLE      | 71.87      |
| ALLIGATOR   | 70.21      |
| OSTRICH     | 69.69      |
| CANARY      | 67.87      |
| CAECILIAN   | 67.81      |
| COELACANTH  | 65.4       |
| STERLET     | 64.88      |
| ESHARK      | 62.21      |
| LANCELET    | 43.48      |
| ACORN_WORM  | 42.81      |
| STARFISH    | 42.6       |
| SEA_ANEMONE | 41.85      |
| STONYCORAL  | 41.21      |
| SEA_URCHIN  | 40.91      |
| SOFTCORAL   | 39.86      |
| OYSTER      | 39.34      |
| SNAIL       | 39.34      |
| PRIAPULA    | 39.26      |
| ALVINELLA   | 39.25      |
| TRICHOPLAX  | 38.87      |
| CAPITELLA   | 37.26      |
| SPONGE      | 35.54      |
| SCORPION    | 34.38      |
| TERMITE     | 30.27      |
| SHRIMP      | 30.02      |

Supplementary Figure 2: CLUSTAL OMEGA DNA-PKcs METAZOA VERTEBRATE INVERTEBRATE

CLUSTAL O(1.2.4) multiple sequence alignment

|             |                                                              |    |
|-------------|--------------------------------------------------------------|----|
| TERMITE     | -----MMGSELIGFVEVINSI----SGNHLNKYIEAKSNISNIISYFE-DKRKR       | 47 |
| SHRIMP      | -----MAGGGREEELDLLGKLSFGPQNGQGDPAADKDVIVDIAELLA-VDLTPAQ      | 51 |
| SCORPION    | -----MNEITNSLHENILKLNDFI---KYQKD--EGHSSIVYIKDISEICLRGTLSEK   | 49 |
| ALVINELLA   | -----MEN                                                     | 3  |
| CAPITELLA   | -----MARALQEQLAGLVSDT---RQPGVNNARISHESIGNIGAICL-NDVNASD      | 47 |
| SPONGE      | -----MESRIESLWESL---HSSSP-QRYSYATEVASDLYSLCV-EQITSESE        | 42 |
| OYSTER      | -----MAASLLEDNLRSLNECL---TTADN-SSKEQADSIVADISQICI-NESTDKD    | 47 |
| SNAIL       | -----MAATLEETLRSLHDQ-----SGA-SAYNLANGLIADIRQICL-HEISEKD      | 43 |
| TRICHOPLAX  | -----MASNLSQLLIDLHALL---NLQSL-HRGSNACDIASDITVLCL-QTASDAE     | 46 |
| SEA_ANEMONE | -----MTDAISSRLLQLNELV---AEESP-LRQESAEIARDLRAHCS-QLRDESE      | 46 |
| PRIAPULA    | -----MARTVRIEDHVQTLLESL---PSDDREADPETAHSAVADLAHKCL-QDISKRD   | 49 |
| ESHARK      | ---MAGPRGAADTLSAFSLHLL---SLSDVKSAAAESHSAVGSISRDFRCSSSDSQ     | 54 |
| STERLET     | MAQPGSCSVGAGGIQNLHLKHSFL---NATDAKSAAVESHNLIGNLQCEM-VSKNENE   | 56 |
| COELACANTH  | MAEEGSPSAVEGVSYLLKIHSSL---TVDTKSAIEIENIFGNLRQECV-VTSDENE     | 56 |
| HUMAN       | -----MAGSGAGVRCSSLRLQETL---SAADRCGAALAGHQLIRLGLQCEV-LSSSPAV  | 50 |
| CAECILIAN   | MSVPGVGGDSAVGVQGSLLRLHASL---SSKDPGLEAPVAQSLIRSLGEECV-TSSGDSV | 56 |
| PLATYPUS    | -----MAGSVPGPQGSLLRLQRFL---EAEDAGVSAVAAYQLIRLGLQCEV-LSAGPAV  | 50 |
| CANARY      | -----MAGVQQLLQLHRC---QPGDAGGSALHGYSLLRSLAETCL-ASLASGE        | 46 |
| OSTRICH     | -----MCS-----ERKDVQADCV-F---ALP                              | 17 |
| TURTLE      | -MAAAPVGGGGGIQGSLLHQLSCAL---QDPDPGTAALRGYHLIRGVGEACV-TSTGDGA | 55 |
| ALLIGATOR   | -----MAALVPVV-IRTGDSA                                        | 15 |
| SOFTCORAL   | -----MTEVIDRYLNQLNSCL---KTLSSSRG-READICRDLRLYCI-ENINETQ      | 46 |
| STONYCORAL  | -----MSDLLNRYLTHLHSL---PSLDAPHCGLDASNTVVLDGSLFCL-ENVSSSE     | 46 |
| ACORN_WORM  | -----MPSSELQSKLAELLELL---DETPSQHTVEKCNLIGETQLICL-RTTSENE     | 48 |
| LANCELET    | -----MAGSGSLEARLSELHALL---AESDHGHGAVEAHNLVADIAQICL-RHTAERD   | 49 |
| SEA_URCHIN  | -----MAAAELQRHLAELHEVI---DSGGTAHGPETAQDLVVDIAQLCL-NQTRENE    | 48 |
| STARFISH    | -----MATADLPVKLSELNGLI---STRKSLHVAEKAQDLVVDLGHCL-RQLSENE     | 48 |

N-TERMINAL UNIT

|             |                                                              |     |
|-------------|--------------------------------------------------------------|-----|
| TERMITE     | -LDGAFVTLFDKKTGILQFIQKALKQDAFTEAIKESFTLLKQLIDVFKERMS----CHVV | 102 |
| SHRIMP      | -YDLYISQVL-GEKGIITFGRSVSKDQSFVEAKKSTLDVLTLDKREAQKIN---KYVD   | 105 |
| SCORPION    | -RSYVCSLILRKEDGFLHFLEEAVNTPSLKDSLIEALQFLNLFNINIGNKVV---QYGI  | 104 |
| ALVINELLA   | -LGCCCALLFKSKETGITNFKKVVQKDEFLDCKVDALKMLLALVVKYDKKLL---SYSL  | 58  |
| CAPITELLA   | -VDLAYSVIFNHETGLIKFLKKIIQNDEFEGCKCEILELLKTFISKFPKGVH---PYAV  | 102 |
| SPONGE      | -LAYSSVLFNPDNGILKFLHDVTTLEEFASCHEELKLLSNFVKNLSRRVL---SHIV    | 97  |
| OYSTER      | -IDLCCSVLFDKRGKLVFSETVTKEEFQCKQKILEFLSEFVQRIGKKII---PYVF     | 102 |
| SNAIL       | -RDYCCSALFDKDIGIIAFLQKVAARDEFQSTKTNLDFIGDFLQKVGKLL---PYAI    | 98  |
| TRICHOPLAX  | -KAYCSALFQDYGVVTFLRKSLGDDLDKCKEDLLKLI TAYMEKIGGKIS---PYAV    | 101 |
| SEA_ANEMONE | LGARCSILFDKKTGIIIRFLHKTIANQEFVECKTELLKFLQSYLQQLNTRVN---PYAV  | 102 |
| PRIAPULA    | -VDLTCVLFSEDRGVLIFLRRAIPLDEFKLAKEQLLHSHFINKGQTRIL---TYAV     | 104 |
| ESHARK      | -LALQCSMVFSKDGTLLVFLRKSRLFEEFRDSREDVLKLLSEVVERIGEAVG---RYAC  | 109 |
| STERLET     | -LVLQTSLVFSKENGLLAFVRKSLNIEDFRDTREEALKLLTTFLDRIAHKVNWEKKNYAC | 115 |
| COELACANTH  | -LALHISLIFSKEIGLLIFLRKSLSEEFDRNREEILKFLTAFVEKIGQLN---PYAC    | 111 |
| HUMAN       | -LALQTSLVFSRDFGLLVFVRKSLNSIEFRECREEILKFLCIFLEKMGQKIA---PYSV  | 105 |
| CAECILIAN   | -LALQTSLVFSKEHGLLAFIHKSLGIEEFRCREETLKFLCIFLEKIGQKVV---PYAC   | 111 |
| PLATYPUS    | -QALHTSLVFSKEFGLPVFIRKSLDIEEFRCREAEALKFLCIFLEKIGQKIE---PYSY  | 105 |
| CANARY      | -QALHLSLVFSQEYGLLVFIHRSLTIEEFRCREAEALKFLCVFMEKVGDKIH---PYAC  | 101 |
| OSTRICH     | -AALHISLVFSQEYGLLVFIHKSLGIEEFRCREAEALKFLCAFLEKIGEKVH---PYAC  | 72  |
| TURTLE      | -RALQTSLVFSKDNGLLVFVRKSLSMEEFRECREAEALKFLCAFLEKIGQGVH---PYAH | 110 |
| ALLIGATOR   | -QALQSSLVFSKQGLLVFIRKSLSIEEFRCREAEALKFLCTFLEKIGQGVH---PYAC   | 70  |
| SOFTCORAL   | -LAYCSLLFNQDDGLITFVKAVVQLDEFKCKEVIISFLAEYIAKVKTRIS---PYAT    | 101 |
| STONYCORAL  | -QAYYSLLFSGETSIVSFLRKVITLDEFQDAKIELLQFLQSYVMKMGKIN---PYVV    | 101 |
| ACORN_WORM  | -LAYHCSVVFHKETGILLFLKKTITIDQYVSSKERILEFVYNFMIRADKKIV---TYAL  | 103 |
| LANCELET    | -VAYCCSVLFQESTGITAFLRKVTLDQYLPKAVETLSFLLAFLLEKIGRKIQ---PHAV  | 104 |
| SEA_URCHIN  | -LAFCRSELQKETGITITFLQKAVSKDEYGGSKVQTFLEFLGQVQAKELVL---DHAK   | 103 |
| STARFISH    | -LAYCCSOLFNDNGILVFLNKAIPKDELKGSKEQLLEFLHAFLLKAGSRLL---ARTV   | 103 |

: : : . \* : : : :

N-TERMINAL UNIT

Supplementary Figure 2: CLUSTAL OMEGA DNA-PKcs METAZOA VERTEBRATE INVERTEBRATE

|             |                                                               |     |
|-------------|---------------------------------------------------------------|-----|
| TERMITE     | QIKDLCKTCILLEKKAEEKDAFDVIQSVLENG---PWND-NLNVDELFDKLINPFKSNK   | 158 |
| SHRIMP      | DIRKYTYLYLYNVEKSTKVQAAALEVFCTLLAKCGSHIDIQ-EINVDFQIERLCIDIRS-- | 162 |
| SCORPION    | TVKDVVFSIFLRNQLAKVKILALSALIKVLELCSGAISS-QFNLQKIVNKIIEYLAQA-   | 162 |
| ALVINELLA   | DLKDVSMFLRDRFAKVKVVALDLDLIEVVTFVAGSEVAD-ELKISGIAEKLFTELVHS-   | 116 |
| CAPITELLA   | DVKDAQLQLITRDRRAVKNATPLLIPELLKQTSGLPVAG-DLQVBMIEERLKFELIKS-   | 160 |
| SPONGE      | PITDVCVFIEMREKSAKVNATLNLINTLELGCCKTEYSH-DLDIPKIAKFFQAALLP-    | 155 |
| OYSTER      | DIKDVCSLFFRERLAKIKNLSVPLAKVLELSVGSVNVQ-DLGIKDMINKFFMELTKS-    | 160 |
| SNAIL       | DKEACVSAFSDRYAKVNKNSALGVLVKVELTVGSPIRE-EMKIDNVEKLFRELTKT-     | 156 |
| TRICHOPLAX  | QIKDVCISLFTDRDKAARVNATFPPLLQLLSSKLSHSSVVE-ELAIKSLVDKYMSACKQP- | 159 |
| SEA_ANEMONE | AIKDICKMLLQESSKVKIETFLPLIQMLQTKLESSIID-EMDIPKIDRYFKACLQS-     | 160 |
| PRIAPULA    | DIKDTCLAVFSRDRQADVKNATFPPLLIKVLQLCRGSQTQA-KLDVPKLIDRYFNELTQS- | 162 |
| ESHARK      | DIKGTCCVVVYTKKAAKCKAAALDLDLITLLHSLKSSSCLQ-QFKIGELFNKFGDLSQK-  | 167 |
| STERLET     | DIKDTCLVVYTKDRAAKCKVSALELLIKLHLI-TSPCLLQ-EFKVGMFNKFGDLAQK-    | 172 |
| COELACANTH  | NVKLILFPVFFF----FIFIFTYLLQLQSTKSPHCIE-EFKVSEMFKFYGELAQK-      | 164 |
| HUMAN       | EIKNCTSVYTKDRAAKCKIPALDLDLILKLLQTFRRSRLMD-EFKIGELFSKFYGELALK- | 163 |
| CAECILIAN   | DIKNTCCVVVYTKKAAKCKVPALELLIKVLQILKNSYEIE-ELKVKEIFNKFYSELGVK-  | 169 |
| PLATYPUS    | DIKSVCSISVSKDRAAKCKIPALELLIKLLQTLRSRLME-ELKVGIFNKFYEEELALK-   | 163 |
| CANARY      | NIKQTCISVYIKERTAKCKISALELLIKLHLTLQRSCLEME-EMKVGEIFNKFYEEELAA- | 159 |
| OSTRICH     | NVKQTCISVYTKKAAKCKIPALELLIKLQNLRRSCLME-EMKVGEIFNKFYGELATR-    | 130 |
| TURTLE      | DIKQTCISVYTKKAAKCKIPALELLIKLQNLRRSFLME-ELKVGEIFNKFYGELAA-     | 168 |
| ALLIGATOR   | DIKQTCISVYTKDKMAKCKIPALELLIKLQNVQCSSLMG-ELKVGEIFNKFYGELAGK-   | 128 |
| SOFTCORAL   | DIKDICLKLFTKDKNARVNKETFVLLQLFELKFEPTIVE-KLDVKNIVEKYFSACSQS-   | 159 |
| STONYCORAL  | EIKDICLKIFSQDHSNKAETAELPLMAEILDVKLESSVVE-KLDVPIFDKYFGACIQP-   | 159 |
| ACORN_WORM  | DIKDVCLSLFTDRDKMAKIKNRTFPPLNKLLELTANTPVAK-ELGVSKLIDKYFSQLMQP- | 161 |
| LANCELET    | EIVKEVCMVFSRDRSRVKCATFPVLKVKVQLTIHSQDGD-ELRVSDMVDRMFLELTMK-   | 162 |
| SEA_URCHIN  | DIKDVCMVSLYTRDKLAKVKATFPPLVIELLKLTSGRMDDEAMGVDMALKKFFGELGQP-  | 162 |
| STARFISH    | EIKKICISAFMRDKSAKVKTKTFPVLIELLQRSASAQMEA-DLDIPKMIELYFEQLMQP-  | 161 |
|             | : . : : .                                                     |     |

**N-TERMINAL UNIT**

|             |                                                                  |     |
|-------------|------------------------------------------------------------------|-----|
| TERMITE     | SNTMPAKVVQKHLHLGIIVHKYPECLRP-EETRLLLRIYLSELE-----MQTSHA-T-       | 209 |
| SHRIMP      | --AKGSTVLQHQLOTLGMLMYSYPQNLRH--QSPLILKIFKQQLV-----KHTGS          | 208 |
| SCORPION    | SSKITPTVKQQAAYLLGISSRHYPDCMQL--CSERLLNWLKDLK-----FHTTSN--Q       | 212 |
| ALVINELLA   | S-RHPS TVQQRMYQLLGVIAEMYPELMVR--HADRLVNMYVVTIK-----KQMTSKTS-     | 166 |
| CAPITELLA   | P-KPAASVKAHIFHLGVIAELFPEKMVR--GSDKLLNLYMTTLK-----QEIESKTH-       | 210 |
| SPONGE      | T-KHSATIRGGIYHLLGVVLCWEFPEHLVK--ISSRLIDIYMSNLK-----SEMTVKKTK     | 206 |
| OYSTER      | VSKLPASVKESIYVILGLLAEIYPEHMTQ--YAGKLVDIYLRALK-----AEMTSKTK-      | 211 |
| SNAIL       | S-KLVP TVKGN IYFLLGVIAEVYPELITQ--DSDRLVGLYVSALK-----AEMTSKTK-    | 206 |
| TRICHOPLAX  | T-KYSS TVKSGMYSLLGTIAEKFP EYIMP--HAQQLLTIYLN TLK-----SQMTGKNT-   | 209 |
| SEA_ANEMONE | S-KQOSTVRFWLYTILGVFAEVFPEHMLG--NADRLIS IYINL LN-----SEMKS KGNK   | 211 |
| PRIAPULA    | S-RLTS TVKQGVYHLLGVIAESYPELMVA--YADKLIS IYVNE LK-----NQMKS KTK-  | 212 |
| ESHARK      | S-KFPD TVLEK VYEL LGVLAEVQPTEMLH--NSEKLFCAYLNE LR-----VQMTSATR-  | 217 |
| STERLET     | S-KIPD TVLEKIYEL LGVVLGEVQPSDMLN--NSEKLYRAYLSE LK-----SQMTSATR-  | 222 |
| COELACANTH  | S-KLPD TVLEK VYEL LGVVLGEVQPS EMLH--NSEKLFRAFLGELK-----TQMRSTTK- | 214 |
| HUMAN       | K-KIPD TVLEK VYEL LGLLGEVHPSEMIN--NAENLFR AFLGELK-----TQMTSAVR-  | 213 |
| CAECILIAN   | S-KVPD TVLEK VYEL LGVVLGEVQPSDMLD--NSEKLFRAYLGE LK-----KQMTSTTR- | 219 |
| PLATYPUS    | T-KITD TVLEKIYEL LGVVLGEVHPSEMLC--NSEKLFRAYLGE LK-----MQMTSSTR-  | 213 |
| CANARY      | S-RIPD TVLEKIYEL LGVVLGEVQPSDMIN--NSEKLFRAYLRE LK-----TQMTSATR-  | 209 |
| OSTRICH     | S-KVPD TVLEKIYEL LGVVLGEVQPSDMIN--NSEKLFRAYLGE LK-----TQMTSTTR-  | 180 |
| TURTLE      | S-KVPD TVLEKLYEL LGVVLGEVQPSDMDV--NSEKLFRAFLGELK-----TQMTSATR-   | 218 |
| ALLIGATOR   | S-RVPD TVLEKIYEL LGVVLGEVQPSDMLD--NSEKLFRAYLGE LK-----TQMTSATR-  | 178 |
| SOFTCORAL   | T-KKSSVSYGIYSLGLTLAEYFPEYMVD--KADRLVQIYVGV LK-----AE-MRKS G-     | 208 |
| STONYCORAL  | V-KHSS TVKYWLFSL LGTIKVFPECVIS--HSDHLVKHYVSVL KLENLIPQMTRKTK-    | 215 |
| ACORN_WORM  | S-KLAATVKHGIYHLLGVVFAQYYP ELMTK--YSDRLN VVMKAL K-----DQMLSKTK-   | 211 |
| LANCELET    | S-QTTATVKSGALS LGVISEVY PDLMVQKDHDPDRLLKVYISMLK-----EQMESRTR-    | 214 |
| SEA_URCHIN  | S-KLSQSVKLG IYQTLGAFGEYYPQLMMH--YSDRLFNVLVST LK-----QQMTTKTK-    | 212 |
| STARFISH    | S-KLSQ TVKQGIYCL LGVLA E IY PVLMSG--YSERLLSVYIATLN-----QQMTSKTR- | 211 |
|             | : . : * * : : :                                                  |     |

**N-TERMINAL UNIT**

Supplementary Figure 2: CLUSTAL OMEGA DNA-PKcs METAZOA VERTEBRATE INVERTEBRATE

|              |                                                                    |            |
|--------------|--------------------------------------------------------------------|------------|
| TERMITE      | AVKYQIIAGCLNGLTEFLYVPLKPQE--KEARRIYDCVTAVARKHK-----EMRVAPR         | 261        |
| SHRIMP       | KPDLNALAGVLRGLALYLHHPPEGIDDDPQLFTELYKHIHKVLNPDL----NLPRRDAQR       | 264        |
| SCORPION     | KSESSIIVGCLQGLNEFMYQFPLQDTEDEKAYQLFKFIRIILSKR-----DVKTYDMAK        | 267        |
| ALVINELLA    | KPDIPLITGSLKGLCHLVHFTQSAEEAAHSCDIYKYTCAAISKEA--NEKLSKYEMAE         | 224        |
| CAPITELLA    | EPYVYIAGCLQGLTHFMVNFQTSADEGAETHAYSIIKYCVTMDQ----NLKKRYEMPK         | 266        |
| SPONGE       | KPELPIISGCLYGLTAYLNNFQSASSEGSVYAQDIYKYTRMAIDPLA----NLTRYEVPR       | 262        |
| OYSTER       | KPELSVISGCLGLASCLVNFTEDE--EDSQNSYETFKFARMAIDPDI----NYTRYDVPR       | 265        |
| SNAIL        | KPEFPVIVGCLQGLTAYLVNFQSSDEGSSHSYEIFNYARMAIDHKV----EFSKYDVPK        | 262        |
| TRICHOPLAX   | KLDMPVIYGCLRGLTSYLYNFQTSVEEESKYAADIYKYARLAIDPKV----ELPRYDLPK       | 265        |
| SEA_ANEMONE  | SPDKQVIAGCLRGLSSYLNVFQTSAAEGSKFARDIYEFTRMAIDVQG----TLQRYDVPR       | 267        |
| PRIAPULA     | KPEYPIVIGCLRGLTCYLNFTFSQSADEGSGYARDVYDCVMRCTGQHL----SEIRRYDVAK     | 269        |
| ESHARK       | EPKFLVVSGCLRGLTALMINFTKSMEDDPKASKDIFDYALKAINPQI----DLKRYAVPL       | 273        |
| STERLET      | EPKLPVVAGCLRGLTALMINFTKSMEDDPKSSKEIFDFALKAISPQT----EFKRYAVLL       | 278        |
| COELACANTH   | EPKLSVVAGCLRGLTALMINFTKSVDEDPKTSKEIFDYAVMAISPQV----DLKRYAVPL       | 270        |
| <b>HUMAN</b> | <b>EPKLPVIAGCLRGLSLLCNFTKSMEDDPQTSREIFNFVLKAIRPQI----DLKRYAVPS</b> | <b>269</b> |
| CAECILIAN    | EPKLSVVAGCLRGLTSLMINFTKSMEDDPKVSKEIFDYSVKAISPV----ELKRYAVPL        | 275        |
| PLATYPUS     | EPKLPVVAGCLRGLSALMCNFTKSMEDDPQTSKEIFDFAVKAISPQV----DLKRYAVPL       | 269        |
| CANARY       | GPKLPVIVAGCLRGLVALMYNFTKSVDEDPQTAKEIFDFAMKAISPQV----DQKRYAVPL      | 265        |
| OSTRICH      | VPKLPVIVAGCLRGLAALMYNFTKSEDEDPQTSKEIFDFAMKAIRPQI----DQKRYAVQL      | 236        |
| TURTLE       | EPKLPVVAGCLRGLTALMYNFTKSMEDDPHTSKEIFDFAVKAINPQV----DLKRYAVPL       | 274        |
| ALLIGATOR    | EPKLPVVAGCLRGLTALLYNFTKSMEDDPRTSKEIFDFSVKAINPQV----DLKRYAVPL       | 234        |
| SOFTCORAL    | KPDMPVIVAGCLRGLDSTLVNFQTSVNEGSIYAKNIYFSLRSAIDSKI----NYARYDVPR      | 264        |
| STONYCORAL   | KPDMLIIVAGCLRGLTSYLYNFQTSVEEGSKFAKDIYTYGRMAINPQV----SLSRYEVPK      | 271        |
| ACORN_WORM   | QAEPLVVAGCLRGLTHLLVNFQTSVEEDGKHTLDIYKFASLAMPDST----QLLRYGVPE       | 267        |
| LANCELET     | KPEMLVIVAGCLRGLTHLVNFQTSVEEGSAHCKDIYNFTRAVSPQV----EMARYDVPK        | 270        |
| SEA_URCHIN   | KPEMTVIVAGCLRGLSHLLVNFQTSVEENSKCKDIYQYVTVMSVDPGYPYRSGTKPRYIIPK     | 272        |
| STARFISH     | KPELTVIVAGCLRGLGHYLVNFQTSVEEGAKHCKDIYRFARMAIDPTV----DHTRYELNK      | 267        |
|              | . : * : ** : * :                                                   |            |

**N-TERMINAL UNIT**

|              |                                                                    |            |
|--------------|--------------------------------------------------------------------|------------|
| TERMITE      | CALGLIQAHGGLAKFLYDEYK---FWHEFLKWINNSAG--EDHKAGVSAALDVFYQVASI       | 317        |
| SHRIMP       | AALLELIHTHGAKFSSQLFEDCT---QVFQWVFKWCGSRNRDDHKAALPAMDTFIVVIANM      | 321        |
| SCORPION     | ASLTLSSHAALLAQFLYEDSM---NIYKIIETWNSNRVRSGLYNALDAVFKQISDM           | 324        |
| ALVINELLA    | SGLKLLAKHSAQFNKFLLEDEYK---IMYERLAFWCHHHNRVMMHLGFSAMEAFFKQISAH      | 281        |
| CAPITELLA    | ASLGLMAKHSAQMSDYLLDDFK---DLYETLSYWTNHNHREMAHIGMLALEDFLVQISSA       | 323        |
| SPONGE       | AGLSLISRHAAQFREYLKVDSE---HMYESELSSWSNHKNKECRVVAVNAIGSFFREVSTQ      | 319        |
| OYSTER       | AGLKLFSRHSAQFQKSLADDYQ---GMYQKLKSWSKHNNRELLHLGTAAMEAFLTQISEV       | 322        |
| SNAIL        | AGLQLFARHAGQFSQFLVDDYE---NMYTKLQAWSKHQNRDVLHGHVAAAMDALFRQIAEA      | 319        |
| TRICHOPLAX   | AGLNLIKHAHQFCDYISREAE---ALYEVIIYRWRHRNRDIRAAAFHAALEEMKQIAEY        | 322        |
| SEA_ANEMONE  | AGLNLLSRHAGQFQEICTEHNVSLIVYPAIYRWCCQNRETKYAALDAMDSDLKQVSEY         | 327        |
| PRIAPULA     | SALWLLAKHAAQLDRFLLDYK---AVYSLRWSRHHNRDVQIACYAALAVLKQIASV           | 326        |
| ESHARK       | AGLRLFTLHSAQFGTCLMDNYR---TVFEKMKKSCGHTNSEMKKASYSALDSFLKQVAIQ       | 330        |
| STERLET      | AGLRLFAKHAGQFSSCLMDNYR---SLYEVMSKWCGHTNIEMKKAGYHAALEAFLKQVALL      | 335        |
| COELACANTH   | AGLRMFALHANQFNCLMDNYR---SLFETMSKCCGHANGELKRAGYAALLENFLKQVAAM       | 327        |
| <b>HUMAN</b> | <b>AGLRLFALHSAQFSTCLLDNYV---SLFEVLLKWAHTNVELKKAALSALDSFLKQVSNM</b> | <b>326</b> |
| CAECILIAN    | AGLHMLAIHSAQFGSCLMDNYR---SLYEVMSKWCGHTNADLKKAGHLAALSFLKQIASI       | 332        |
| PLATYPUS     | AGLHLFTVHSAQFGTNLLDNYV---YLFEVMAKWCGHTNDELKKAALSALDSFLKQISLM       | 326        |
| CANARY       | AGLQLFIWHSAQFGALLLDNYV---SLYEVMSKWCGHTNDELKKAALSALDSFLKQISLM       | 322        |
| OSTRICH      | AGLQLFGRHAAQFGTFLLDYV---SLFETMCKWCGHTNDELKKAALSALDSFLKQISLM        | 293        |
| TURTLE       | AGLHLFSMHAQFGTFLLDNYI---SLFEVMSKWCGHTNDELKKAALSALDSFLKQISLM        | 331        |
| ALLIGATOR    | AGLRMFLHAAQFGTCLLDNYV---MLFEVMSKWCGHTNVDLKKAGHSAALDSVLKQISLM       | 291        |
| SOFTCORAL    | AGLNFLARHSAQYKEYLTKDYE---SVYNTLFDWCRRKKNELRVKGFALAEFLKQVAEC        | 321        |
| STONYCORAL   | AGLYLFAKHSAQFKEYLAKDYE---VMYGDLYRWCKHNNKETSAAAYAAAMEAFFQISLY       | 328        |
| ACORN_WORM   | AGLWLLAKHAPQFNKYLDDHE---EMYDKLFSWCQHNNRDMKSAGYASLEAFLKQVASM        | 324        |
| LANCELET     | AALWLLAKHAAQFNEYLMDNYE---DMYRKLIEWSQHPNRDLKQAGYAALSFLKQISDM        | 327        |
| SEA_URCHIN   | AGLNLIIRRHADQFNEYLRYDHE---MVYNRLKYWSHSHNSEMKWAGYDALQAFKVVSHM       | 329        |
| STARFISH     | AGLNMFALHSAQFGPYLYSDHQ---DLHEAFNKWSAHNNPAVKAVGFAAQEAFLQIAEI        | 324        |
|              | ..* :: * . : . . : . : :                                           |            |

**N-TERMINAL UNIT**

Supplementary Figure 2: CLUSTAL OMEGA DNA-PKcs METAZOA VERTEBRATE INVERTEBRATE

|              |                                                                                                                                                                       |            |
|--------------|-----------------------------------------------------------------------------------------------------------------------------------------------------------------------|------------|
| TERMITE      | LKDNTSE---TGHHVFLYFINF <del>F</del> KNKMLSSSTSSYDMKLV <del>I</del> KAFGLFAAPCRVYMTPQD                                                                                 | 373        |
| SHRIMP       | LELQAMED-DKRGVKIFKYLLEQ <del>E</del> YNKMLETS-ESTSKLSLAVKGYGLSGACRQFLSPVE                                                                                             | 379        |
| SCORPION     | LEQNYEDS---CKAE <del>I</del> FKFFLEK <del>F</del> Q <del>L</del> MIKC-SENIRRVSTAIRGFGYFAKVCKLYLTEKD                                                                   | 380        |
| ALVINELLA    | LVLLANEG--RKERSIFMFFMEE <del>F</del> RKIMDNPESSSKEISLAIHGYGYFATPCRIFLSQDD                                                                                             | 339        |
| CAPITELLA    | LVTKKEG-NRKEGAVFKFFIQK <del>F</del> RDI <del>M</del> DNSSGSKEIAIAIKGYGYFAAPCKLYLTPKD                                                                                  | 382        |
| SPONGE       | ISDPSIS--RELGISNYKFFM <del>K</del> CFRSLMNDPDINHRLLSIAVKGYGHFAKPCRLYGSMED                                                                                             | 377        |
| OYSTER       | LVTKAREG--KKEAAMFKFV <del>T</del> R <del>F</del> KEIMENSSASAKMSLAIRGYGLLAAPCREFLQQKD                                                                                  | 380        |
| SNAIL        | ITEKAKRG--IKEGGIFKFFVQ <del>V</del> QT <del>M</del> QNSSASSEVSMAVR <del>G</del> GLFAAPCSIFLEPAD                                                                       | 377        |
| TRICHOPLAX   | LVNENDA---ANINIFKFFL <del>K</del> KFRSIDS <del>G</del> SSDAKELAIAIRGYGYFAAPCKTLKDD                                                                                    | 378        |
| SEA_ANEMONE  | IVLDEA----EAVNPKEDFIQ <del>R</del> FR <del>I</del> IDS <del>S</del> STTQ <del>M</del> SI <del>A</del> IRGYGFFAKPCKLFMTAED                                             | 382        |
| PRIAPULA     | LVEGGEET-RQRDTIVFTFFV <del>R</del> E <del>F</del> R <del>T</del> IEA-GTDTRDVAIAVRGYGSFATPC <del>K</del> FLSEAD                                                        | 384        |
| ESHARK       | VAENALHL-----KDKLEYIMQ <del>O</del> F <del>Y</del> DI <del>I</del> RTP <del>E</del> SSMKELLSIAIRGYGLFAAPCKAVN-SND                                                     | 384        |
| STERLET      | VAENALHL-----KSKLEF <del>F</del> MRQ <del>F</del> Y <del>T</del> IV <del>I</del> R <del>T</del> L <del>D</del> SS <del>T</del> KE <del>L</del> SIAIRGYGLFAAPCKAVC-LGD | 389        |
| COELACANTH   | VAENAELH-----KNKLEYFMKQ <del>F</del> Y <del>G</del> I <del>R</del> T <del>L</del> D <del>S</del> SNKELLSIAIRGYGLFAAPCKAVC-PED                                         | 381        |
| <b>HUMAN</b> | <b>VAKNAEMH-----KNKLOYFMQ<del>F</del>Y<del>G</del>I<del>R</del>NV<del>D</del>SSN<del>K</del>ELLSIAIRGYGLFAGPCKVIN-AKD</b>                                             | <b>380</b> |
| CAECILIAN    | VTHDAETH-----KSKLQ <del>F</del> MD <del>Q</del> F <del>Y</del> RI <del>I</del> RK <del>L</del> D <del>S</del> SNKELLSIAIRGYGLFAAPCKVIN-AKD                            | 386        |
| PLATYPUS     | VAKDVELH-----RSKLQ <del>F</del> ME <del>Q</del> F <del>Y</del> EI <del>I</del> RK <del>I</del> D <del>S</del> TN <del>K</del> ELLSIAIRGYGLFAAPCKVIN-PND               | 380        |
| CANARY       | VAKDAELH-----KSKLR <del>F</del> ME <del>Q</del> F <del>Y</del> G <del>T</del> I <del>R</del> RD <del>S</del> SSKE <del>L</del> SIAIRGYGLFAAPCKAIH-PED                 | 376        |
| OSTRICH      | VAKDAELH-----KSKLQ <del>F</del> MD <del>Q</del> F <del>Y</del> G <del>I</del> IR <del>R</del> D <del>S</del> SN <del>R</del> ELLSIAIHGYGLFAAPCKAIR-SKD                | 347        |
| TURTLE       | VAKDAEMH-----KSKLQ <del>F</del> ME <del>K</del> F <del>Y</del> DI <del>I</del> RK <del>M</del> D <del>S</del> SNKELLSIAIRGYGLFAAPCKAIN-SKD                            | 385        |
| ALLIGATOR    | VAKDAEMH-----KSKLK <del>F</del> ME <del>Q</del> F <del>Y</del> SI <del>I</del> RK <del>M</del> D <del>S</del> SNKELLSIAIRGYGLFAAPCKAIN-SKD                            | 345        |
| SOFTCORAL    | LVTEDFET-TVECGDIFKYFI <del>K</del> EF <del>R</del> RI <del>I</del> NS <del>N</del> ESL <del>T</del> RE <del>I</del> SI <del>A</del> IRGYGYFAKPKVFLKDED                | 380        |
| STONYCORAL   | FVGRHG---DKSDLAMFMYFI <del>K</del> T <del>F</del> R <del>R</del> I <del>I</del> D <del>S</del> V <del>L</del> SD <del>T</del> RQ <del>M</del> AIAVRGYGYFSKPKLFMQADD   | 385        |
| ACORN_WORM   | LVEEGNKD-KRNK <del>T</del> IFKAF <del>I</del> R <del>K</del> FR <del>S</del> I <del>D</del> N <del>R</del> ES <del>G</del> TRE <del>I</del> CIAIKGYGLFAAPCKFLSEDD     | 383        |
| LANCELET     | LVARHEKENNKADLAVFKFFI <del>R</del> E <del>F</del> R <del>T</del> I <del>D</del> T <del>E</del> AG <del>T</del> RE <del>M</del> SI <del>A</del> VRGYGFFAAPCKMFLSESD    | 387        |
| SEA_URCHIN   | LVENADKK-RSSDVAVLKYFI <del>K</del> S <del>F</del> R <del>S</del> T <del>I</del> D <del>A</del> SS <del>S</del> SK <del>L</del> STAIRGYGVFAAPCKAFMKEAD                 | 388        |
| STARFISH     | LVERAAKR-DASDMAVFRFV <del>K</del> R <del>F</del> R <del>D</del> I <del>D</del> N <del>P</del> Q <del>S</del> D <del>T</del> RALSSAVRGYGYFAAPCKLFMTDDD                 | 383        |
| .            | . : : : : : . : : * : : *                                                                                                                                             | .          |

**N-TERMINAL UNIT**

|              |                                                                                                                                                                                                          |            |
|--------------|----------------------------------------------------------------------------------------------------------------------------------------------------------------------------------------------------------|------------|
| TERMITE      | VLYMFTVVMQRAEQIYFKEG-----DISNADLQNLDPYIESLSSIMRQLSAVTNEQLV                                                                                                                                               | 426        |
| SHRIMP       | VHTMFSQVLTASQHFYQSG-----DMLENKLTNLPYSIESLAIIISNMDVVNSGLE                                                                                                                                                 | 432        |
| SCORPION     | VKYMLNDVIKKSEQHCLNEE-----KILDERIQILPSFLDSLSSIVLQLEISESSLN                                                                                                                                                | 433        |
| ALVINELLA    | VKFMFTEVMQRSEQLIVQA-----EYLD <del>R</del> ITSLPHFL <del>E</del> ALASIIKELSEVTD <del>T</del> LIL                                                                                                          | 392        |
| CAPITELLA    | VLFMFNEMLRSEQLFLSGA-----EQND <del>D</del> RII <del>G</del> LH <del>S</del> FLGALASIVEELDQFSETFLF                                                                                                         | 435        |
| SPONGE       | LHFMFGEMVQRSEQLFLASVDFTTSSSSVAFEERFLPTFIEALANISKEIQNLDPVCLS                                                                                                                                              | 437        |
| OYSTER       | VQYMFSEMITKSEQYLSSDK-----EDI <del>D</del> KLYSLPSYLEALGNIIRQLDHVPETYAT                                                                                                                                   | 434        |
| SNAIL        | VTFMFSEMITKCEQEF <del>L</del> R <del>T</del> N-----EPVHEKLSLDPY <del>L</del> HALASIIKVVTKVSEVYAL                                                                                                         | 430        |
| TRICHOPLAX   | VRFMTMDLLQRSEQLFFID-----VNV <del>D</del> KIQYLP <del>S</del> FL <del>E</del> AFASILN <del>I</del> LDEVND <del>T</del> FTR                                                                                | 429        |
| SEA_ANEMONE  | VKFMFTEMMQRSEQIYLRQS-----EMQEDRVQQLPNFLEALS <del>F</del> IEE <del>L</del> DDI <del>S</del> DGFLV                                                                                                         | 435        |
| PRIAPULA     | VQYMF <del>T</del> DMV <del>V</del> RSRQIFHSGE-----EMIDSRMVELPPLLEALASIVTEL <del>D</del> QVSE <del>S</del> FLA                                                                                           | 437        |
| ESHARK       | VDFMYIELIQ <del>R</del> CKQMYL <del>T</del> EA-----D <del>T</del> EDDNVYQL <del>P</del> SFL <del>S</del> IASVIFH <del>L</del> DKIPGVYTP                                                                  | 437        |
| STERLET      | VDFMYTELIQ <del>R</del> CKQMYL <del>T</del> ET-----D <del>T</del> EDDNVYQL <del>P</del> SFL <del>S</del> IASVIFH <del>L</del> DRIP <del>E</del> VYTP                                                     | 442        |
| COELACANTH   | V <del>D</del> LMYTELIQ <del>R</del> CKQMYL <del>T</del> ET-----D <del>T</del> EDDNVYQL <del>P</del> SFL <del>S</del> IASV <del>I</del> FH <del>I</del> DRIP <del>E</del> VYTP                           | 434        |
| <b>HUMAN</b> | <b>VDFMYVELIQ<del>R</del>CKQ<del>M</del>FL<del>T</del>QT-----DTGDDR<del>V</del>YQ<del>M</del>PSFL<del>Q</del>S<del>V</del>ASVLLYL<del>D</del>T<del>V</del>PEVYTP</b>                                     | <b>433</b> |
| CAECILIAN    | VDFMYIELIQ <del>R</del> CKQMYL <del>T</del> EA-----E <del>T</del> EDDNMYQL <del>P</del> HFL <del>Q</del> S <del>I</del> ASVIVH <del>M</del> DSI <del>P</del> EVYTP                                       | 439        |
| PLATYPUS     | VDIMYIELIQ <del>R</del> CKQMYL <del>T</del> EA-----E <del>T</del> ID <del>D</del> H <del>L</del> FL <del>Q</del> PSFL <del>Q</del> S <del>I</del> ASVLLHL <del>D</del> DKV <del>P</del> EVYTP            | 433        |
| CANARY       | V <del>D</del> NMYVELL <del>Q</del> RCKQMYL <del>T</del> EA-----E <del>T</del> ID <del>D</del> HLYQL <del>P</del> SFL <del>Q</del> S <del>I</del> ASVIFH <del>I</del> DKV <del>P</del> EVYTP             | 429        |
| OSTRICH      | V <del>D</del> MYVELL <del>Q</del> RCKQMYL <del>T</del> EA-----E <del>T</del> VD <del>D</del> H <del>I</del> YQL <del>P</del> SFL <del>Q</del> S <del>I</del> ASVIFH <del>L</del> DTI <del>P</del> EVYTP | 400        |
| TURTLE       | VDFMYVELL <del>Q</del> RCKQMYL <del>T</del> EA-----E <del>T</del> AD <del>E</del> H <del>V</del> YQL <del>P</del> SFL <del>Q</del> S <del>I</del> ASVIFH <del>I</del> DTI <del>P</del> EVYTP             | 438        |
| ALLIGATOR    | VDIMYIELL <del>Q</del> RCKQMYL <del>T</del> EA-----E <del>T</del> AD <del>D</del> NVYQL <del>P</del> SC <del>L</del> Q <del>S</del> IASVIFH <del>L</del> DTL <del>P</del> EVYTP                          | 398        |
| SOFTCORAL    | IKYMF <del>T</del> SIQ <del>M</del> SEQMYFNDS-----ELKE <del>E</del> KLQNL <del>P</del> SFL <del>E</del> ALGFIVEE <del>I</del> DEI <del>P</del> PAFLS                                                     | 433        |
| STONYCORAL   | VRFMFSEIMQRSEQYLSQS-----DL <del>S</del> EDRAQHLP <del>T</del> FLEALSSIEE <del>L</del> DKI <del>S</del> DSVLA                                                                                             | 438        |
| ACORN_WORM   | VKFMFNEMIQRSEQLYFSQN-----E <del>L</del> V <del>D</del> ET <del>I</del> PHLP <del>S</del> FL <del>E</del> ALACIV <del>R</del> EL <del>D</del> VSD <del>T</del> FLS                                        | 436        |
| LANCELET     | VKFMFSEMMQRSEQLYFGTA-----D <del>S</del> MED <del>K</del> VHHL <del>P</del> SFL <del>E</del> ALASIVQHL <del>D</del> QLSD <del>M</del> FVT                                                                 | 440        |
| SEA_URCHIN   | VRFMFNEIILRSEQQLVQ-----E <del>-</del> ERL <del>S</del> QL <del>P</del> TYLEALASIVGQL <del>D</del> T <del>V</del> SD <del>T</del> FLT                                                                     | 438        |
| STARFISH     | VKFMFTEMIQRSEQLY <del>L</del> Q <del>Q</del> -----E <del>V</del> S <del>D</del> DK <del>L</del> NQL <del>P</del> NFLEALASIMRQL <del>D</del> VLS <del>D</del> S <del>F</del> QA                           | 436        |
| .            | : * : : : : : : : : : :                                                                                                                                                                                  | .          |

**N-TERMINAL UNIT**



Supplementary Figure 2: CLUSTAL OMEGA DNA-PKcs METAZOA VERTEBRATE INVERTEBRATE

|             |                                 |                                      |           |
|-------------|---------------------------------|--------------------------------------|-----------|
| TERMITE     | ALQCLTVQLIENFPKLPKP--FHWLAIIRAI | TVTLLSSLAESGGTFLFEFFLSNVVYQGIIRS     | 484       |
| SHRIMP      | NVQQLSALVEHFPLVSSF--KRFLAYRAL   | FRLFFT VYNK--PGYFHEFLHTFVYKAI VLS    | 489       |
| SCORPION    | YLEKLAVFQIQNFYPYLPSP--YHFLCYNSL | LKFLAVHHSK-GPQFKGFLNKIIYQGIIRT       | 490       |
| ALVINELLA   | LVEKLI LLVVEHSPKLPEK--LHYIFVVT  | ILKVCFSLTPK-GSVFRSFI SRFVYQALLRT     | 449       |
| CAPITELLA   | SLERLVVLQMQVLPRLHVK--LHNQCYIAL  | IRLFLGLALK-GSIFKGF LERI IYQSLIRS     | 492       |
| SPONGE      | SLQKLSVLLFHCYPFLSSH--VRYQGSVSL  | LKLIMAVSSI-PTSFKQFLSHIVYQGVIRS       | 494       |
| OYSTER      | SIERLMIILAENFPTIHQK--QHFFSVKSL  | LWVLT LMPK-GEVFSQVLSGFVQMLIRT        | 491       |
| SNAIL       | TLERLLVLLLENIPTIYRG--FHFTCLKGI  | LHLLIVLQSK-GSTFNKVL SGFVYQGLIRT      | 487       |
| TRICHOPLAX  | SLEKLTIVLFENFPYVINE--LHSLCYKSL  | FELLLLALHSK-GAALKNF LSRVYQGLIRT      | 486       |
| SEA_ANEMONE | SLERLIIVLFESFPRLSKS--AKYLCHKAL  | VKMLINISAK-GSVLKNFLSEVYQGLIRT        | 492       |
| PRIAPULA    | SLEQLVVLFGNVPLLRRESRLDHRACGA    | VVRVLLALRSK-RATQRSLV KRVVFQGLLST     | 496       |
| ESHARK      | VLERLLVVQIDSFPLY SAR--MQPICCRS  | IVKV FVALAGK-GPVLWNFI STV VHQGLIRV   | 494       |
| STERLET     | VLERLLVVQIDSFPQYSQR--MQPVCCRS   | ILKVFI ALAGK-GPVLWSFI STV VHQGLIRV   | 499       |
| COELACANTH  | VLERLLVVQIDSFAQYSQK--MQPTCCSI   | IVKV FVALAGK-GPVLWSFI STV VHQGLIRV   | 491       |
| HUMAN       | VLEHLVVMQIDSFPQYSQK--MQLVCCRA   | IVKV FVALAAGK-GPVLRNCSI STV VHQGLIRI | 490       |
| CAECILIAN   | VLERLLVVQIDSFSQYSVK--MQSVCCRS   | IKVFLALAGK-GPVLWNFI STV VHQGLIRV     | 496       |
| PLATYPUS    | VLERLLVVQIDSFPQYSIK--MQSACCKA   | IVKIFLALAGK-GPVLWNFI STV VHQGLIRV    | 490       |
| CANARY      | VLEHLVVLQINSFPQYTEK--MQPVCCRS   | IVKVFLSLSGK-GPVLWSFI STV VHQGLIRI    | 486       |
| OSTRICH     | VLERLVVVQIDTFPQYSEK--MQSVCCRS   | IVKVFLAL TGK-GPILWSFI STV VHQGLIRI   | 457       |
| TURTLE      | VLERLIVVQIDSFPQYSVK--MQSACCKS   | IVKVFLALAGK-GPVLWSFI STV VHQGLIRV    | 495       |
| ALLIGATOR   | VLEHLIVMQIDSFPQYSEK--MQPVCCRS   | IVKVFLALAGK-GPVLWNFI STV VHQGLIRV    | 455       |
| SOFTCORAL   | FLEHLVVLIEKFPPELGRG--PQFICLKAM  | LKFLAL TTR-GASLKSFLSEIVYQGLIRT       | 490       |
| STONYCORAL  | CMERIVRVLFDFKFAILNKG--GKFLCCKAL | IRVLFHLSSK-GAILRNFLSEIVYQGLIRT       | 495       |
| ACORN_WORM  | SLETMIVVILMENFPRFGKA--LHYTCYKS  | ITAVLVVALSPK-GATLRNFSRIVYQGLIRT      | 493       |
| LANCELET    | SLEKLVVLFENFPRLGKK--MHLICQKAI   | ILKVLLALVPK-GATLRTF LSRIVYQALIRT     | 497       |
| SEA_URCHIN  | SLEKLVVLVFGSYPHQARS--SQWTSHTAI  | LQILIALSAK-GTSLQGF LSRVYQWILIRT      | 495       |
| STARFISH    | ALERLVVVQVSSYPRVFNK--YOYLHQAI   | LLVLIALSSK-GATLKNFLSRVYQALVQT        | 493       |
|             | :: :                            | : :                                  | : : : : : |

**N-TERMINAL UNIT**

|             |                          |                         |                       |     |
|-------------|--------------------------|-------------------------|-----------------------|-----|
| TERMITE     | CKHQIAIDVELQKG-----      | QFHENVFTYKDYIPLWKE      | LLSVNNFQKR            | 526 |
| SHRIMP      | CSHAPVEVSSPGEQGSWRG---   | KAGGEEWGLKNEVVTFSSYIPL  | WTALMVPEKVANI         | 546 |
| SCORPION    | CSYPVRFEIEAREENMS-----   | GDNLELKNPREITSKSYSSLWEN | LLYIVRNKEL            | 540 |
| ALVINELLA   | CSDPAVTTTFDDDGQE-----    | LDPEYRTRRIITYKDYLMWKC   | LLTCSRFKEL            | 496 |
| CAPITELLA   | CSDPIVLESQEAKSEN-----    | VDEVN LKVDVSYQDYLPMWKA  | LLTAGK LKAL           | 539 |
| SPONGE      | CSLPVIIEAVQGDSDAVVT----- | AAPLADSNDKVMSYLDVYQL    | WLIQ LIDYK K LKM      | 546 |
| OYSTER      | CSDPPIETEDMTESN-----     | QSEQTGTKVTFKDFIELWDT    | LFNSPRIKEF            | 537 |
| SNAIL       | CSDPVMGADENQEIS-----     | TAETDLTVKQITYKDYLE      | VWVSGLLESGIKDL        | 535 |
| TRICHOPLAX  | CSDHPVYVETSDNLNIS-----   | QDSVILETGPRISYKDYISL    | WKNLIQATEIKGL         | 535 |
| SEA_ANEMONE | CSDPVLDEGPDVDKQ-----     | VGVVTGSRSDQVTFKDYLE     | PLWEHMLDKTKFKMY       | 541 |
| PRIAPULA    | CSDHPVAMETSSVFSQN-----   | ADDVDDDFQERDPRNIYIDY    | MDMWRHLLGSDKMKGL      | 549 |
| ESHARK      | CSKPVLLPGEGTGRSESLQ---   | QSSASEVMWTKWVSPSYKDY    | LDLFRSLLNCGRMKEF      | 551 |
| STERLET     | CSKPVVLTGEEGGQGGG-----   | QPVEKGQVHTGKWKVPSYR     | DYLDLFRNLECDKMKDT     | 553 |
| COELACANTH  | CSKPVPLSTEGIGKGLQSEEEA   | PAAPGEVRTGKWKVPSYKDY    | LDLFRNLECDK LKQS      | 551 |
| HUMAN       | CSKPVVLPKGP----ESESE---  | DHRASGEVRTGKWKVPTYKDY   | VDLFRHLLSSDQMMDS      | 543 |
| CAECILIAN   | CSKPVTLGKEGSGKSPGSE---   | EPPVAEEVRIKWKVPTYKDY    | LDLFRSLLDCDRMKES      | 553 |
| PLATYPUS    | CSKPVFLKEAYGRDASESD---   | DSSAFGEVRVGRWKVPTYKDY   | LDLFRSLLNCD E MKDS    | 547 |
| CANARY      | FSKPITFSKDFSVKETSGETE--- | EAFEAGEVGTQRSKLPTYKDY   | LYLFRSLLSCDTMKES      | 543 |
| OSTRICH     | FSKPITFSKEYFGKKTSGSE---  | ESPAAGEAGAKWKVPTYKDY    | LYLFRSLLNCD T MKES    | 514 |
| TURTLE      | CSKPITFSREIFGKEVSKLE---  | ESTTAGEVRTGKWKVPTYKDY   | LDLFRSLLNCD T MKES    | 552 |
| ALLIGATOR   | CSKPIVFSREFDGKASKSE---   | EPPAVGEVRTGKWKVPTYR     | DYLDLFRSLLNCDAMKES    | 512 |
| SOFTCORAL   | CSDPVLDEGVDM-----        | EGVTEFDVRHISYKDYLE      | LWECFLDGGQYKDQ        | 536 |
| STONYCORAL  | CSDHPVILKEVNGESTIME----- | EREVEGSTPNTSLKDYLE      | LWELLDKDKL KDE        | 546 |
| ACORN_WORM  | CSDHPVLEGE MYDV-----S-G- | DE--TSDELLIDARKVSYKDY   | LDLWNHLLDSSQLRI-      | 543 |
| LANCELET    | CSDHPNIEGVTAEDDLPVASG-   | EEGGEQQPPVKKRFSYR       | DYLELWGNLLDSSRLKEL    | 556 |
| SEA_URCHIN  | CSFPVLLESGGD-----        | EGE-EQRSDEMEIEQDSRRV    | SYKSFMDLWTRLLDSKFIKTS | 547 |
| STARFISH    | CSDHPVLDGSPSID--HPVLGN-  | DDQDTEADILADARHITYKDY   | VKLWASLLDSTHVKEV      | 550 |
|             | .                        | : : : :                 |                       |     |

**N-TERMINAL UNIT**

Supplementary Figure 2: CLUSTAL OMEGA DNA-PKcs METAZOA VERTEBRATE INVERTEBRATE

Sequence alignment table showing DNA-PKcs protein sequences for various species including TERMITE, SHRIMP, SCORPION, ALVINELLA, CAPITELLA, SPONGE, OYSTER, SNAIL, TRICHOPLAX, SEA\_ANEMONE, PRIAPULA, ESHARK, STERLET, COELACANTH, HUMAN, CAECILIAN, PLATYPUS, CANARY, OSTRICH, TURTLE, ALLIGATOR, SOFTCORAL, STONYCORAL, ACORN\_WORM, LANCELET, SEA\_URCHIN, and STARFISH. The HUMAN row is highlighted in yellow. Column numbers 574-600 are on the right.

N-TERMINAL UNIT

Sequence alignment table showing N-terminal unit sequences for various species including TERMITE, SHRIMP, SCORPION, ALVINELLA, CAPITELLA, SPONGE, OYSTER, SNAIL, TRICHOPLAX, SEA\_ANEMONE, PRIAPULA, ESHARK, STERLET, COELACANTH, HUMAN, CAECILIAN, PLATYPUS, CANARY, OSTRICH, TURTLE, ALLIGATOR, SOFTCORAL, STONYCORAL, ACORN\_WORM, LANCELET, SEA\_URCHIN, and STARFISH. The HUMAN row is highlighted in yellow. Column numbers 626-654 are on the right.

N-TERMINAL UNIT

Supplementary Figure 2: CLUSTAL OMEGA DNA-PKcs METAZOA VERTEBRATE INVERTEBRATE

|              |                                                            |            |
|--------------|------------------------------------------------------------|------------|
| TERMITE      | YKVISESSNKPLVSGFYKLLTVALQLCDRLHYFSDYGDMLN-----             | 667        |
| SHRIMP       | WFVVTQSSLQPLVSAHYNATTVLTCSRQTFQFSRK-----                   | 685        |
| SCORPION     | LEIIQFINKNPYISGFYKLLITVCLTICKKTRYFQHVKKLTKKEEI-----        | 692        |
| ALVINELLA    | HQLIVHSTMHPYVSGFYKLLSVSMTVASRIDYFQIGKIEREDANWCQDIKQTAIEDME | 655        |
| CAPITELLA    | HQLILQSSKPLVSGLYKMLTVMQVASQISYFKEMNRQLKIETSD-----SIKME     | 691        |
| SPONGE       | QEVVSLATRYPLVSGFYKLLTVCLSICNKTHTFDVHDLGGQGTGD-----DDV---   | 701        |
| OYSTER       | HTLILQSTKPLVSGFYKLLAVSMKIANKLYFQGMVSLSPVKK-----EVKME       | 690        |
| SNAIL        | HTVVVQSTEFPLVSGFYKLLAVTMKIANKLEYFKDIAVENSFKK-----EEQMD     | 686        |
| TRICHOPLAX   | KNLVLVSTRLPLVSGFYKLLIEICMTISSSLSYFEDLNIEVTKCT-----IN-----  | 679        |
| SEA_ANEMONE  | RDLVVSSSRFPVSGFYKLLLEVCMKICKRLRFQYEVTA-----D-----          | 688        |
| PRIAPULA     | HEVILLSTRWPVSGLYKLLTVCLSICSSLQYFKAMRKVNDSQLH-----SEAME     | 707        |
| ESHARK       | YELILRSTQFPLVSGFYKLLSATMKIACKINRYFKGVSTNTWKQCH-----        | 702        |
| STERLET      | HELILQSTRFPLVSGFYKLLSVSMKIAKRIKYFQGVSPRSCKTSP-----         | 705        |
| COELACANTH   | HEVILQSTRPLVSGFYKLLSVSMKIAKRIKYFEGVSSKSKQNS-----           | 703        |
| <b>HUMAN</b> | <b>YELILQSTRPLISGFYKLLSITVRNAKKIKRYFEGVSPKSLKHSP-----</b>  | <b>695</b> |
| CAECILIAN    | YELILQSTRPLISGFYKLLSVAMKNAKRTKYFEGVSPKSHKKCP-----          | 704        |
| PLATYPUS     | YELILQSTRPLISGFYKLLSIAIRNAKMKRYFEGVSPRSLKKS-----           | 697        |
| CANARY       | YELIVHSTRPLISGFYKLLSVTMKIAKRIKYFEDISPRSLRRC-----           | 694        |
| OSTRICH      | YELIIHSTRPLISGFYKLLSVAMKIAKRIKYFEGVSPKSLRKC-----           | 665        |
| TURTLE       | YELIVQSTRPLISGFYKLLSVAMKIAKRIKYFEGVSPKSYQKCP-----          | 703        |
| ALLIGATOR    | YELIIQSTRPLISGFYKLLSVVMKIVKIKRYFEDVSPGTQKKYP-----          | 663        |
| SOFTCORAL    | KELVLSARFPLVSGFYKLLDIVMKISRKLDFYFKGMTLKDVTGTC-----VD---DM- | 696        |
| STONYCORAL   | RDIIIMSSRFPVSGFYKLLLEVCMKCEKLSFFKNIKAEKPDLC-----NENL-      | 707        |
| ACORN_WORM   | HEVIVHSTRPLVSGFYKLLSVCMTISQNIQYFQGINENAKVAVP-----RHIEEKAS  | 707        |
| LANCELET     | HALLILHSTRPLVSGFYKLLSVCMTICTKVYFKDLDTKLSFS-----EESMD       | 709        |
| SEA_URCHIN   | HELILQSSQLPLVSGFYKLLTICMTMSRKTAFYFKEVNPVNFRT-----VNEEPPMD  | 704        |
| STARFISH     | HEVILLSCRLPLVSGFYKLLTVMCNICTQIQFFKCIKPSDLSSQ-----EDSMD     | 702        |
|              | .: * :. *: : : *                                           |            |

**N-TERMINAL UNIT**

|              |                                                         |            |
|--------------|---------------------------------------------------------|------------|
| TERMITE      | -----QPTQKASYSLLCRFLQE-----LLIRLQYKNDLQVACL             | 702        |
| SHRIMP       | -----QDPEVETS IHLMSYVRE-----LLQRCRQYRDQLLASCI           | 720        |
| SCORPION     | -----SMSEKCLIAFELFAKFSRE-----VVIYLQYKDELASCI            | 729        |
| ALVINELLA    | IDS-----LTDSDRSQREASFM LFSKFTKE-----VLVKKQSKDDLASCL     | 697        |
| CAPITELLA    | MDE-----EFRTSTAQEEACFM LFTKFAKE-----VMTRLRQYKDDLASCL    | 733        |
| SPONGE       | -----AMETEERTDRQSCYFLFSSFIKE-----VVVQMQQYKDDLASCL       | 741        |
| OYSTER       | VDS-----DQKADIHQ RATCFQLIQFTKE-----VLVRMKQYKDDLAAACL    | 732        |
| SNAIL        | VDE-----TGIDGQTEKHLTYILIKKFSSE-----VLVRMKKFHDDLASCL     | 728        |
| TRICHOPLAX   | -----AAAEAESIDKYLCYLYYKFYKE-----VLVRLKQYKDDLHVSCCL      | 719        |
| SEA_ANEMONE  | -----DMEIVDTS DCTNCF LFRKFIKE-----VLIKMKQFKEDLLSCL      | 728        |
| PRIAPULA     | -----TDSPDAVDNAEILNCF LFKFSKE-----VLVKKMFRGDLVACL       | 749        |
| ESHARK       | -----TDPKACACFALFGKFGKE-----VTIRMKQYKDELIVSCL           | 737        |
| STERLET      | -----EDPKYACFALFAKFGKEVSTILGKEVSVRMKQYKDELLASCL         | 748        |
| COELACANTH   | -----LDPKAYACFALFAKFGKE-----VCARMKQYKDELLASCL           | 738        |
| <b>HUMAN</b> | <b>-----EDPEKYSFCFALFVKFGKE-----VAVKMKQYKDELLASCL</b>   | <b>730</b> |
| CAECILIAN    | -----KDPERFACFALFAKFGKE-----VSAKMKQYKDELLASCL           | 739        |
| PLATYPUS     | -----EDPEKYSFCFALFAKFGKE-----VAVKMKQYKDELLASCL          | 732        |
| CANARY       | -----EDPEKSSCFALFVKFGKE-----VAAKMKQYKDELLASCL           | 729        |
| OSTRICH      | -----EDPEKSSCFALFLKFGKE-----VTAKMKQYKDELLASCL           | 700        |
| TURTLE       | -----DDPEKSSCFALFAKFGKE-----VTAKMKQYKDELLASCL           | 738        |
| ALLIGATOR    | -----EDPEKSSCFALFAKFGKE-----VAARMKQYKDELLASCL           | 698        |
| SOFTCORAL    | -----ETDQLDFSDCRNCF LFFHKFAME-----VVVRMKQYKDDLKSCL      | 736        |
| STONYCORAL   | -----NLEIVDTS DCMKCFVLFHKFTKE-----IVVRMQYKDDLFSCL       | 747        |
| ACORN_WORM   | -----TKDMCTLADKVAAFHLFKKFTKE-----VLIRLQYKDDLASCL        | 747        |
| LANCELET     | TEG-----RDRPSEGGQACFTLFRKFVKE-----VLVRLKQYKDDLASCL      | 749        |
| SEA_URCHIN   | VDDDESIASTRTPSNVSLSDKQACF LFSKFSKE-----VLIRLQYKDDLASCL  | 756        |
| STARFISH     | IDL-----NFSSSSSCVSASDRICFTLFAKFSKE-----VLVRLKQYKDDLASCL | 749        |
|              | : * : * : : : * : *                                     |            |

**N-TERMINAL UNIT**



Supplementary Figure 2: CLUSTAL OMEGA DNA-PKcs METAZOA VERTEBRATE INVERTEBRATE

|              |                                                                        |            |
|--------------|------------------------------------------------------------------------|------------|
| TERMITE      | ETVIAAPVALVVP LPHAVPAFEVI FRVGRSMLPLARLGLSALDKWYCTLPS---- <td>758</td> | 758        |
| SHRIMP       | TLILHLPLCIVQEIFPQLVSP LQMALQLGVSYLPLAEVCLALQLWTKSLSQ---- <td>776</td>  | 776        |
| SCORPION     | EVILSLPTEIVSEINILIPAVQISLQLGLSYLPLAMSCLEDALETWLYSLPS---- <td>785</td>  | 785        |
| ALVINELLA    | LFILSLPYEIVITELHAIVPALQIALQIGSYLPLANAALDALDWTWSQKIPD---- <td>753</td>  | 753        |
| CAPITELLA    | GFILALPREIIALDVTFVPALQRSLEIGRSYLPLARTSLNTELESWSKSLPP---- <td>789</td>  | 789        |
| SPONGE       | HLILVLPKEMVVSDFKELIPAIKALRIGMGYLP LAKSVMEALEKWTLYIVESDKMDTLQ           | 801        |
| OYSTER       | TFILTLPKEIVSEIQMSSVPAIQLTSLIGLSYLP LAMIALDALDYWSDTLPA----SVIR          | 788        |
| SNAIL        | TLILTLPKEIIAQQMSKIVPAIQLTFSVGLSYLPLAEVGLDSLWVWSQVLP-----EVLA           | 784        |
| TRICHOPLAX   | SLILALPYQLIQDDMALIIPAIKVSNIIGLSYLP LANAADALERWSSDLPQ----NIIG           | 775        |
| SEA_ANEMONE  | SLVLSLPYEIVAVDVAAIVPALLETFKLGLSYLPLAQAGLALEEWNASLPG----DVL R           | 784        |
| PRIAPULA     | QLVMALPYEIVVDIVPEIVPAVQVALKIGLSYPPMAHTTLDAL EMMWANLPA----DVMQ          | 805        |
| ESHARK       | NFVLSLPHDIIELDIKAYIPALQAAFKLGLSHTPLADAGLDALEDWSAHI PK----HIIQ          | 793        |
| STERLET      | TFVLSLPHDIVALDIKAYIPALQNSFKLGLSHTPLANTGLYALENWSQFI PK----YVMQ          | 804        |
| COELACANTH   | GFILSLPHTIVELDVKAYIPALQMAFKLGLSHTPLADSGLDALEEWSNRIPK----WVLQ           | 794        |
| <b>HUMAN</b> | <b>TFLLSLPHNIIELDVRAIVPALQMAFKLGLSYTPLAEVGLNALEEWSIYIDR----HVMQ</b>    | <b>786</b> |
| CAECILIAN    | IFILSLPHDIIIMLDIKAYIPALQTAFLKGLSYSPLADAGLDALEDWSAYIPQ----YVIQ          | 795        |
| PLATYPUS     | TFVLCPLPHDIIIMLDIKAYIPALQMAFKLGLSYPLADVGLNALEEWSIYIPR----HVIQ          | 788        |
| CANARY       | IFLLSLPHDIIIMLDIKAYIPALQNAFKLGLSCTPMADLGLDALEDWSAHI PR----HMQ          | 785        |
| OSTRICH      | SFLLSLPPDIIIMLDIKAYIPALQNAFKLGLSCIPMADLGLDALEDWSAHI PK----HIMQ         | 756        |
| TURTLE       | TFVLSLPHDIIIMLDIKAYIPALQNAFKLGLSYT PMADLGLDALEDWSAYIPK----HIMQ         | 794        |
| ALLIGATOR    | TFVLSLPHDIIIMLDIKAYIPALQNAFKLGLSYT PMADVALSALEDWSSHIPK----NIMQ         | 754        |
| SOFTCORAL    | QLVLSLPNELVLCDDIIPFLKTAFLKGLGFLPLAEAAALDALDWTWAE LPS----EILH           | 792        |
| STONYCORAL   | LVVLSLPLELVTLDLVSSVAALKLTKLGLSYTPLAEAGLDALESWT TALPA----DKLK           | 803        |
| ACORN_WORM   | FLVLSLPHDIIIMLDIKAYIPALQNAFKLGLSYLPLAHAGLDALETWAFRLQH----NALQ          | 803        |
| LANCELET     | LLVLSLPHQIVQSEISTLVPALQTFRLGLSYLPLAHAGLDALEWRLLNLP R----SALE           | 805        |
| SEA_URCHIN   | FLILSLPHQVVENQVHDVIPALKTAFLKGLSYLPLAESGLSALQAWIRYIP S----DVLK          | 812        |
| STARFISH     | LLVLSLPHDIIIMLDIKAYIPALQNAFKLGLSYLPLAEVGLNALEEWSIYIDR----HVMQ          | 805        |

**N-TERMINAL UNIT**

|              |                                                                       |            |
|--------------|-----------------------------------------------------------------------|------------|
| TERMITE      | PLLMQVLPYLPDPFLRSQGVASGDV I I--EKELMVLGRRNRNYSQNKKVA-----R---         | 808        |
| SHRIMP       | EHMPHVLPLLPLPYLRSQETGGAEV---HTRVITVKMAFA----RQRRKVDQKMK---            | 825        |
| SCORPION     | EHYCKLLPSLNDYFLASDNISLQPLKNIHT-----FTKQS---LVVKKKLP LKISQYKK-         | 836        |
| ALVINELLA    | PFYTDILQYLDYLYK SATD TDFSASAATDQMIILSTTKSNH--KFGRRKIPKVLKQKRK         | 811        |
| CAPITELLA    | PFYEQLLPYLDAYLTSSADEKND-----TSLVQKDPMK--KQGKKKIPV KLLKQTMF            | 840        |
| SPONGE       | CLVNEILPLLADYLYKATSVQLKEEEDGGRG-----KQYAT--KRYAR---MKMVEKVS-          | 849        |
| OYSTER       | PFYPQILPCLDSYLYKTMDQGADDVS---ENTMEM-NKSKSG--KGRKK-LPVRI LKGPK-        | 840        |
| SNAIL        | PHYANILPCLDSYLYKTVD TGAEDVS---VETLVTVSSSKSK--YRGKK-LPVRLVKERP         | 838        |
| TRICHOPLAX   | PYFSDILPCFDDYLYKSSADDTTETLVEDSSKALK----AR--TGKAKKLP----VKVV-          | 823        |
| SEA_ANEMONE  | RHLRNILPYLDGYLYKSATDAVEEEDQVSRRTATLRSTYSR--LGKILSLYI DFVSKR-          | 841        |
| PRIAPULA     | PYYKQILPHLDGYLYKTTEGADSV P----TPTVAIT SANAT--RGRKK-IPV KLLQSGS-       | 856        |
| ESHARK       | PHYKDILPHLDGYLYKTA AF-NEAQN---NWEGMNI NNPSR--KGGSK-VLFHHTKSK-         | 844        |
| STERLET      | PHYKDILPYLDGFLKTTASND EEQN---NWEVMSLSRSTE--KGYGR-VLMRL LKKA-          | 856        |
| COELACANTH   | PYYKEILPCLDGYLYKTSISAGDTPS----SWEVLR LRSASQ--KGDHK-VLIRLLKKA-         | 846        |
| <b>HUMAN</b> | <b>PYYKDILPCLDGYLYKTSALSDETKN----NWEVSALSRAAQ--KGFNK-VVLKHLK KTK-</b> | <b>838</b> |
| CAECILIAN    | PHYSEILPYLDGYLYKTASSADEYQN----SWEVMRLSRAAQ--KGFNR-FLVQRLK KTK-        | 847        |
| PLATYPUS     | PYYKDILPCLDSYLYKTALSDETKN---NMEVTMLS RATQ--KGFNK-VVVRHLKKA-           | 840        |
| CANARY       | PYYKDVLPLLDGYLYKSSTSTVESQN---NWEVRKLSQAAQ--KGRNK-VVIQRIRRAK-          | 837        |
| OSTRICH      | PYYKDVLPLLDGYLYKNSASTVEPQD---NWEVRKISRAAQ--KGFNK-VVIQHLRRAK-          | 808        |
| TURTLE       | PYYKDVLPLFDGYLYKTGSADESQN---NWEVRKLSRAAQ--KGFNK-VVIQRLKKA-            | 846        |
| ALLIGATOR    | PYYKDVLPLLDGYLYKTATSPDEFQN---NWEVKKLSQAVQ--KGFNK-VVIQRLRKA-           | 806        |
| SOFTCORAL    | PYLREVLPLQLDGYLYKTASELETSNEKETL-----RSR--KSGK---TKASKSSK-             | 837        |
| STONYCORAL   | PFLREILQCLDGYLYTTLGDIQLHNE---CNTIVLITSSHHT--SRGRK-LPLKLLKMKP-         | 856        |
| ACORN_WORM   | PYYKDILPCLDGYLYKTVDSTNAENA---SSQTVSLTMTTRTG--KRRNK-IPIRLLK PAT-       | 856        |
| LANCELET     | PHFPHILPYLDSYLYQTAADTGSSSSSD-GFQTVSLTAASST--RGRKK-IPV KLLKAAA-        | 860        |
| SEA_URCHIN   | PYYAQVLPQLDGYLYGAGSGSEDEGS---RPEVLVIQTASSR--VGRRR-IPSKLLKKA-          | 865        |
| STARFISH     | PHLKVILPLLDGYLYRGITITQGS DAADVQTVTMASASSSGR--AGRKK-LPAKLIKAS-         | 861        |

**N-TERMINAL UNIT**

Supplementary Figure 2: CLUSTAL OMEGA DNA-PKcs METAZOA VERTEBRATE INVERTEBRATE

|              |                                                                  |            |
|--------------|------------------------------------------------------------------|------------|
| TERMITE      | KKIIIEHPESLSQLQHEIISFLGQLDSTTCLALLKDPQQ--EEDVIPWATCLQQPLVFP      | 865        |
| SHRIMP       | -ESKRVEETAMQKIQLMILRLIGSLDPLLRHTIP-QDPDTIASAAVRWNV--QKLVKFA      | 881        |
| SCORPION     | IKQTDLHESELIKVQHRILRFLGSLGQVGNQYNFAMIS-ADKIKIHEVAVAVDINKQNHKIFY  | 895        |
| ALVINELLA    | TLSERNQESQLAEIRRRCVLLGSLGGIVNMLVK-SSTEQVTKSAMAWDN--VKHLKHF       | 868        |
| CAPITELLA    | -DAEKKESELKEIQRKCVLLGSLGGSINHALVF-GQTAN-PPDLVAVDS--DQHLKFD       | 895        |
| SPONGE       | EGLHQGSRDDITSVRRIRLLLLGSLGGVNVNESLSKVP----SQHSLVSWDS--DRRLGFA    | 903        |
| OYSTER       | TDSKQVFETQLAKVKQRVMTYLGRLGGEVNHALLS-G--SDVCEEAIAWDA--EQHLRFD     | 895        |
| SNAIL        | VLDLKGYESQLSVVKQKIVTYLGLSGGSMNFALLA-RREEEISRRAIAWDT--EQHLRFD     | 895        |
| TRICHOPLAX   | NPTGGSKDSPLAQVRLRIVQLLGRLLGGNTNSLVIR-KGNDGSSQAVAWDN--HKRLPFA     | 880        |
| SEA_ANEMONE  | NILPQVGESSLVTIRVQILRLGLGQGGHTNLCLLG-SDGGVDSGSAVWDT--VKHLPFA      | 898        |
| PRIAPULA     | R--KMAEDSALTARMRIVRFLGGLGGANNISLIS-CDAEDIAKVAVAVDA--EKNLKFG      | 911        |
| ESHARK       | E-FLVSEDSAITAVRRRIVRLLGSLGGQNNRSLVTAESAEMMKRCIAWVT--EKPLSFA      | 901        |
| STERLET      | R-FSLTEDSPALVRRRVRLGLHGGQINRSLVTATSAEEMMKFVAVDS--EKRLNFA         | 913        |
| COELACANTH   | A-VSLNEDSSLGAVRGRVVRVLLGSLGGQVNRSLVTAASSEEMMKFVSWDT--EKRLSFA     | 903        |
| <b>HUMAN</b> | <b>N-LSSNEAISLEEIRRVVQMLGSLGGQINKNLLVTSSDEMMSYVAVDR--EKRLSFA</b> | <b>895</b> |
| CAECILIAN    | T-LSLDQDVS LASIRNRVQILGSLGGQINQSLVTASCAEEMMKYVSWDT--EKRLSFA      | 904        |
| PLATYPUS     | A-TAPVEDLSLESVTRVVRLLGSLGGQINRNVTAASADEMMKKCVAWDT--EKRLSFA       | 897        |
| CANARY       | T-LSVDNSPLQAVRTRVARLLGSLGGQINHLITATSAAEMMKKCVSWDT--EKHLSFA       | 894        |
| OSTRICH      | T-SL-VGDPSELEAVRTRVARLLGSLGGQINHLITATSAAEMMKKCVSWDT--EKRLSFA     | 864        |
| TURTLE       | T-LSLEDNLSLEAVRTRVVRLLGSLGGQINRLLTAASTEEMMKFVSWDT--EKHLSFA       | 903        |
| ALLIGATOR    | A-LSLNEDLSLEAMRSRVVQLLGSLGGQVNRSLVTAASEEEMMKFVSWDS--EKHLNFA      | 863        |
| SOFTCORAL    | RNPNEENSPLNKVRHRILILLGLTGLGKCNLGLLE-GGEGSVASSGIAWDT--KQHLSFA     | 894        |
| STONYCORAL   | QSQHQMTLTPLAKVRHKILRMFGGLGGETNILLDNTGI--NSSNAVVDWT--ENHLTFA      | 912        |
| ACORN_WORM   | Q--DGSDESPLTIVLKLIVHLLGLLGGSTNGYLLE-SSKEEIAKKA VAWDT--ENHLQFP    | 911        |
| LANCELET     | E-RNQVQESDLVKARLRIVRFLGSLGGHTNACLVTGLTAEDLAKRAVWDT--QTHLQFA      | 917        |
| SEA_URCHIN   | D-NDQSQDSPLRVQLQILRLLGSLGGSVNVGLLE-TSAQELSNVALAWDS--QPRLNFP      | 921        |
| STARFISH     | T-TGQTQDSPLRVQLRILHLLGSLGGQTNAYLLE-TSAEEIAKVA VAWDT--QPRLQFA     | 917        |
|              | : : * : :                                                        | : * : *    |

**N-TERMINAL UNIT**

|              |                                                                                                                                                                                                                               |            |
|--------------|-------------------------------------------------------------------------------------------------------------------------------------------------------------------------------------------------------------------------------|------------|
| TERMITE      | L <b>PF</b> KDMKLNINLEKLI <b>PR</b> VVELAMTSSDRYTRFT <b>ACEL</b> LHGIVMLI <b>LG</b> SGQEAQTSHP--                                                                                                                              | 923        |
| SHRIMP       | T <b>PF</b> EHIKID <b>IY</b> LDL <b>LP</b> HVVDLAVN <b>SS</b> DRQTKVA <b>ASE</b> LLHS <b>II</b> ILM <b>IG</b> TGAQKSQETQL-                                                                                                    | 940        |
| SCORPION     | L <b>PF</b> IDV <b>KLE</b> I <b>FL</b> DK <b>FL</b> PRIV <b>LT</b> STASQ <b>RQ</b> TKVA <b>ACE</b> LLH <b>AV</b> VT <b>FM</b> VGCGAQ <b>QP</b> ELQA-                                                                          | 954        |
| ALVINELLA    | <b>V</b> PFVD <b>IK</b> PV <b>IY</b> LDV <b>FL</b> PRV <b>VEI</b> ATTS <b>SEC</b> QTKAA <b>ACE</b> LLH <b>SF</b> VLY <b>ML</b> GRSS <b>SQ</b> PKTKA <b>AR</b>                                                                 | 928        |
| CAPITELLA    | L <b>PF</b> LD <b>IK</b> TS <b>IY</b> DA <b>FL</b> PK <b>VV</b> LAT <b>VS</b> SDRQTKVA <b>ACE</b> LLH <b>SL</b> VLL <b>ML</b> GRS <b>AS</b> QPT----                                                                           | 950        |
| SPONGE       | <b>V</b> PFSD <b>LK</b> PE <b>IY</b> LD <b>PY</b> L <b>PT</b> VC <b>EL</b> ALS <b>SS</b> DRQTKVA <b>ACE</b> FL <b>HA</b> AM <b>LF</b> V <b>IG</b> KGT <b>Q</b> QSV-- <b>QK</b> -                                              | 960        |
| OYSTER       | <b>V</b> PFMD <b>MK</b> P <b>QI</b> Y <b>FD</b> PF <b>L</b> PRIV <b>EL</b> AT <b>KS</b> GD <b>RQ</b> TKVA <b>ACE</b> LLH <b>SL</b> ILL <b>CV</b> GRS <b>AT</b> Q <b>PAR</b> -- <b>E</b> -                                     | 952        |
| SNAIL        | <b>I</b> PF <b>FD</b> M <b>KP</b> SI <b>Y</b> FD <b>PF</b> L <b>PH</b> V <b>EL</b> AT <b>Q</b> SS <b>NR</b> QTKV <b>SACE</b> LLH <b>SL</b> ILY <b>TL</b> GR <b>S</b> AQ <b>QP</b> GE <b>IQ</b> K-                             | 954        |
| TRICHOPLAX   | <b>I</b> PF <b>Q</b> DM <b>KP</b> II <b>HL</b> DP <b>FL</b> PRV <b>EL</b> AT <b>S</b> SS <b>DR</b> QTK <b>IA</b> ACE <b>LLH</b> AL <b>V</b> LY <b>MI</b> GR <b>GA</b> Q <b>QP</b> GG <b>TGS</b> -                             | 939        |
| SEA_ANEMONE  | <b>V</b> PF <b>Q</b> DM <b>KP</b> TI <b>Y</b> LD <b>PF</b> L <b>PR</b> V <b>EL</b> AT <b>T</b> SS <b>NR</b> QTKVA <b>ACE</b> LLH <b>TL</b> VLY <b>ML</b> G <b>K</b> GV <b>TQ</b> PD <b>V</b> K <b>V</b> -                     | 957        |
| PRIAPULA     | <b>V</b> PF <b>AD</b> M <b>KP</b> VI <b>Y</b> FD <b>V</b> FL <b>PR</b> V <b>TEL</b> ALS <b>SS</b> DRQTK <b>VV</b> ACE <b>LLH</b> ALL <b>LY</b> IL <b>GT</b> GA <b>Q</b> Q <b>PD</b> S <b>IK</b> S-                            | 970        |
| ESHARK       | <b>V</b> PF <b>MD</b> M <b>KP</b> II <b>Y</b> LD <b>SF</b> I <b>PR</b> IS <b>EL</b> ALS <b>AS</b> DRQTKVA <b>ACE</b> LLH <b>SV</b> VAY <b>TL</b> G <b>K</b> GS <b>Q</b> ISE <b>G</b> Q <b>QE</b> -                            | 960        |
| STERLET      | <b>V</b> PF <b>AD</b> M <b>KP</b> VI <b>Y</b> LD <b>TF</b> L <b>PR</b> IV <b>EL</b> ALS <b>T</b> ND <b>RQ</b> TKVA <b>ACE</b> LLH <b>SV</b> V <b>FM</b> L <b>G</b> KGS <b>Q</b> IP <b>E</b> GE <b>KS</b> -                    | 972        |
| COELACANTH   | <b>V</b> PF <b>AD</b> M <b>KP</b> VI <b>Y</b> LD <b>SF</b> L <b>PR</b> IA <b>EL</b> ALS <b>SS</b> DRQTKVA <b>ACE</b> LLH <b>SV</b> V <b>VY</b> M <b>L</b> G <b>K</b> GS <b>Q</b> IP <b>ER</b> CG <b>G</b> -                   | 962        |
| <b>HUMAN</b> | <b>V</b> PF <b>RE</b> M <b>KP</b> VI <b>Y</b> LD <b>V</b> FL <b>PR</b> V <b>TEL</b> ALT <b>AS</b> DRQTKVA <b>ACE</b> LLH <b>SM</b> V <b>FM</b> L <b>G</b> KAT <b>Q</b> M <b>PE</b> GG <b>Q</b> G-                             | <b>954</b> |
| CAECILIAN    | <b>V</b> PF <b>VD</b> M <b>KP</b> II <b>Y</b> LD <b>SF</b> L <b>PR</b> V <b>TEL</b> ALS <b>T</b> SD <b>RQ</b> TKVA <b>ACE</b> LLH <b>SM</b> V <b>VY</b> M <b>L</b> G <b>K</b> AS <b>Q</b> M <b>PE</b> K <b>D</b> Q <b>S</b> - | 963        |
| PLATYPUS     | <b>V</b> PF <b>AE</b> M <b>KP</b> VI <b>Y</b> LD <b>V</b> FL <b>PR</b> I <b>TEL</b> ALS <b>AS</b> DRQTKVA <b>ACE</b> V <b>LH</b> S <b>IV</b> MF <b>ML</b> G <b>K</b> AS <b>Q</b> IP <b>E</b> GN <b>Q</b> G-                   | 956        |
| CANARY       | <b>V</b> PF <b>AD</b> M <b>KP</b> VI <b>Y</b> LD <b>LF</b> L <b>PH</b> V <b>TEL</b> ALS <b>AS</b> DRQTKVA <b>ACE</b> LLH <b>G</b> IV <b>TY</b> M <b>L</b> G <b>K</b> AS <b>Q</b> M <b>PE</b> GC <b>Q</b> G-                   | 953        |
| OSTRICH      | <b>V</b> PF <b>AD</b> M <b>KP</b> VI <b>Y</b> LD <b>LF</b> L <b>PR</b> V <b>TEL</b> ALS <b>AS</b> DRQAKVA <b>ACE</b> LLH <b>S</b> IVAY <b>ML</b> G <b>K</b> AS <b>Q</b> M <b>PE</b> GC <b>Q</b> G-                            | 923        |
| TURTLE       | <b>V</b> PF <b>AD</b> M <b>KP</b> VI <b>Y</b> LD <b>LF</b> L <b>PR</b> V <b>TEL</b> ALS <b>AS</b> DRQTKVA <b>ACE</b> LLH <b>S</b> IV <b>MY</b> M <b>L</b> GT <b>AS</b> Q <b>MP</b> D <b>G</b> PP <b>G</b> -                   | 962        |
| ALLIGATOR    | <b>V</b> PF <b>VD</b> M <b>KP</b> VI <b>Y</b> LD <b>IF</b> L <b>PR</b> V <b>TEL</b> ALS <b>AS</b> DRQTKVA <b>ACE</b> LLH <b>GL</b> V <b>FM</b> L <b>G</b> KAS <b>Q</b> M <b>PE</b> GR <b>Q</b> G-                             | 922        |
| SOFTCORAL    | <b>V</b> PF <b>Q</b> DM <b>KP</b> TI <b>Y</b> LD <b>PF</b> L <b>PR</b> V <b>EL</b> AT <b>S</b> SS <b>DR</b> QTKVA <b>ASE</b> V <b>FH</b> SL <b>V</b> LF <b>ML</b> G <b>K</b> S <b>V</b> Q <b>IP</b> DA-- <b>SS</b> -          | 952        |
| STONYCORAL   | <b>V</b> PF <b>Q</b> DM <b>KP</b> SI <b>Y</b> LD <b>PF</b> L <b>PR</b> V <b>EL</b> A <b>AK</b> SS <b>DR</b> QTKVA <b>ACE</b> LLH <b>SL</b> V <b>HY</b> M <b>L</b> G <b>K</b> S <b>V</b> T <b>Q</b> P <b>Q</b> G-- <b>FK</b> - | 970        |
| ACORN_WORM   | <b>V</b> PF <b>MD</b> IK <b>PV</b> IC <b>FD</b> PF <b>L</b> PRV <b>EL</b> AT <b>T</b> SS <b>DR</b> QTKVA <b>ACE</b> LLH <b>SL</b> VLY <b>VM</b> V <b>GR</b> GA <b>Q</b> Q <b>PD</b> ST <b>Q</b> V-                            | 970        |
| LANCELET     | <b>V</b> PF <b>MD</b> M <b>KP</b> TV <b>CL</b> DP <b>FL</b> PR <b>IC</b> EL <b>AT</b> TSS <b>DR</b> QTKVA <b>ACE</b> LLH <b>SL</b> VLY <b>VM</b> V <b>Q</b> GA <b>Q</b> Q <b>PG</b> EM <b>Q</b> A-                            | 976        |
| SEA_URCHIN   | <b>V</b> PF <b>VD</b> M <b>KP</b> PE <b>IY</b> LD <b>AF</b> L <b>PR</b> IV <b>EL</b> ALT <b>SS</b> DRQTKVA <b>ACE</b> AL <b>H</b> TL <b>V</b> LF <b>ML</b> G <b>K</b> GS <b>Q</b> Q <b>PD</b> Q <b>RE</b> A-                  | 980        |
| STARFISH     | <b>V</b> PF <b>VD</b> M <b>KP</b> NI <b>LD</b> RY <b>L</b> PRV <b>EL</b> ALT <b>SG</b> DRQTKVA <b>ACE</b> SL <b>H</b> TL <b>V</b> LF <b>ML</b> G <b>K</b> GT <b>Q</b> Q <b>PE</b> Q <b>R</b> A-                               | 976        |
|              | ** . : * : : : * : : : : : : : : : * . * : * : : * .                                                                                                                                                                          |            |

**FOREHEAD**

Supplementary Figure 2: CLUSTAL OMEGA DNA-PKcs METAZOA VERTEBRATE INVERTEBRATE

|              |                                                                   |             |
|--------------|-------------------------------------------------------------------|-------------|
| TERMITE      | -DKYSELFRKLSLPLKLGCDPDPAIHRLYNLLVQLVHWYSKFKLKSKEVEILIQTLM         | 982         |
| SHRIMP       | KEPMALPYRHIFSAMLRACDPDHVTRQLFLTLSYQTIHWFNNRNFENVDTMVLLEALM        | 1000        |
| SCORPION     | IYSMKKLYKNVLPALLQLACDVEVARKLFEPFFQLIHWFTTKRMINSDETKQFVQVIW        | 1014        |
| ALVINELLA    | GEEMDKLYQKLFPPVLLQLACDTEQVARQLFGPLVMQLIHWFTSVMMFQSEGTKILLECIM     | 988         |
| CAPITELLA    | GNPMAAIYRKLFPQMLKLATDVEQVSRQLFEPMLQIHWFTKSNNSHRPDTEALLNSLM        | 1010        |
| SPONGE       | KNPMTKLYQKLFPPVLLQLACDVEQVSRQLFEPMLQIHWFTTRNTQYESPDTVTLLLEAIL     | 1020        |
| OYSTER       | RYSMPLYKKMFPSILQLACDVEQVSRQLFEPMLQIHWFTTRNTQYESPDTVTLLLEAIL       | 1012        |
| SNAIL        | RNPMDSLYRKLFPALLLSLSCDVEQVCRQLFEPMLQIHWFTGNKMAESPESMALLDSIF       | 1014        |
| TRICHOPLAX   | VTNYGNLYKKIFPAILTLASDVEQVSRQLFEPMLQIHWFTGNNSYESPETIALLNALL        | 999         |
| SEA_ANEMONE  | ALPMQNLLWKKLIPVLLQLACDVERVSAQLFHPVLMQLIHWFTNNRKYESPETIALLDALL     | 1017        |
| PRIAPULA     | KRPMSALYSRLLFPVLLRLGCDVEQVSRQLFEPMLQIHWFTLNRMFESPETMCLLDAIM       | 1030        |
| ESHARK       | --TLYKLNRLFPVLLRLGCDVDTVTRQLFEPMLQIHWFTSNRKFESRDTVAMLEAIL         | 1018        |
| STERLET      | TPPMYRLYKRIFFVLLRLACDVEQVSRQLFEPMLQIHWFTNNTKFESQDTVAMLEAIL        | 1032        |
| COELACANTH   | VPPMYRLYKRIFFVLLRLACDVEQVSRQLFEPMLQIHWFTNNTKFESQDTVAMLEAIM        | 1022        |
| <b>HUMAN</b> | <b>APPMYQLYKRTFPVLLRLACDVEQVSRQLFEPMLQIHWFTNNKKFESQDTVAMLEAIL</b> | <b>1014</b> |
| CAECILIAN    | LPPMYQLYKRTFPVLLRLACDVEQVSRQLFEPMLQIHWFTNNKKFESQDTVAMLEAIL        | 1023        |
| PLATYPUS     | SPPMYQLYKRTFPVLLRLACDVEQVSRQLFEPMLQIHWFTNNKKFESQDTVAMLEAIL        | 1016        |
| CANARY       | PPPMYLHKKRFPVLLRLACDIDQVARQLFEPMLQIHWFTNNKKFESQDTVAMLEAIL         | 1013        |
| OSTRICH      | PPPMYQLYKRIFFVLLRLACDVEQVSRQLFEPMLQIHWFTNNKKFESQDTVAMLEAIL        | 983         |
| TURTLE       | SPPMYQLYKRTFPVLLRLACDVEQVSRQLFEPMLQIHWFTNNKKFESQDTVAMLEAIL        | 1022        |
| ALLIGATOR    | SSPMYQLYKRTFPVLLRLACDVEQVSRQLFEPMLQIHWFTNNKKFESQDTVAMLEAIL        | 982         |
| SOFTCORAL    | KSPLEKLNKRVFPVLLQLACDVEQVSRQLFEPMLQIHWFTNNKQYESPDTIILLETLL        | 1012        |
| STONYCORAL   | KSPMEHLWKHFVPTLLQLACDVEQVSRQLFEPMLQIHWFTNNRKYETPETMALLDAIV        | 1030        |
| ACORN_WORM   | KAPMEKLYKVLFPVLLQLACDVEQVSRQLFEPMLQIHWFTCNKKFESPETIAMLDAIL        | 1030        |
| LANCELET     | KNPMTRLYKRVFPVLLQLACDVEQVSRQLFEPMLQIHWFTNNRKYESPETIALLDAIL        | 1036        |
| SEA_URCHIN   | KSPMQLYKRVFPVLLQLACDVEQVSRQLFEPMLQIHWFTSGNKKYESPETIALLDAIL        | 1040        |
| STARFISH     | KSPMQHLYRRVFPVLLRLSCDVEQVSRQLFEPMLQIHWFTGNKKFESSETTALLNAML        | 1036        |
|              | : . : * . * : . : * : : : * * : . : * * :                         |             |

**FOREHEAD**

|              |                                                                          |             |
|--------------|--------------------------------------------------------------------------|-------------|
| TERMITE      | DGIHPTDATALRDFSAARCLHEFVWVSVKQGS-----HVNIKYVMQIYSFCLHPSPSK               | 1035        |
| SHRIMP       | EGIVTANDPALRDVSAQCLAEFVKWSRKQCR--QNSVSSNIKSIKRIFSFCKHPSAFK               | 1058        |
| SCORPION     | DGLVQSKDAVFRDFSAARCLKEFVQWSIKQTSVREQEENPIGMNVLLNCLYNSLHPNPYK             | 1074        |
| ALVINELLA    | DGLVDPNTALRDFSAALCVHEFLQWAIKQTTKKQLESPYNVEMLMNWIYNLARHPSAFK              | 1048        |
| CAPITELLA    | DGIVSPDSAVRDFSAKCIREFLWWSIKQTSKQEQERSPMNPKRLLKRMYSLLEHPSMM               | 1070        |
| SPONGE       | EGIEHPTNASLRDFSAQCIREFLWWSIKQTSKQEQERSPMNPKRLLKRMYSLLEHPSMM              | 1080        |
| OYSTER       | DGIQPNDTALRDFCAVCLREFLWWSIKQTK--NVEKSPINAKSLLKRLYSYALHPGAFK              | 1070        |
| SNAIL        | DGLVQDNTMLRDFAAQCLREFLIWSIKQTSKQEQERSPMNPKRLLKRMYSLLEHPSMM               | 1074        |
| TRICHOPLAX   | DGVIHSTDSALRDFCAKSLREYLHWSIKQTTKKQEQERSPMNPKRLLKRMYSLLEHPSMM             | 1059        |
| SEA_ANEMONE  | EGVVHPTDTSRDFSAQCIREFLWWSIKQTSKQEQERSPMNPKRLLKRMYSLLEHPSMM               | 1077        |
| PRIAPULA     | EGIVDATDAALRDFCGSCIREFLWWSIKQTTVRRQEQERSPMNPKRLLKRMYSLLEHPSMM            | 1090        |
| ESHARK       | DGIVDPVDSTLRDFCGQCVRREFLWWSIKQTTPEQQAKSPANTKSLFKRLYSYALHPNTFK            | 1078        |
| STERLET      | DGVVDPVDSTLRDFCGQCVRREFLWWSIKQTTPEQQAKSPANTKSLFKRLYSYALHPNTFK            | 1092        |
| COELACANTH   | DGIVDPIDSTLRDFCGLCIQREFLWWSIKQTTPEQQAKSPANTKSLFKRLYSYALHPNTFK            | 1082        |
| <b>HUMAN</b> | <b>DGIVDPVDSTLRDFCGRCIREFLWWSIKQITPQQEQKSPVNTKSLFKRLYSYALHPNAFK</b>      | <b>1074</b> |
| CAECILIAN    | DGIVDPVDSTLRDFCGHCIREFLWWSIKQITPQQEQKSPVNTKSLFKRLYSYALHPNAFK             | 1083        |
| PLATYPUS     | DGIVDPVDSTLRDFCGQCVRREFLWWSIKQITPQQEQKSPVNTKSLFKRLYSYALHPNAFK            | 1076        |
| CANARY       | SGIVDPVDSTLRDFCGQCIREFLWWSIKQITPQQEQKSPVNTKSLFKRLYSYALHPNAFK             | 1073        |
| OSTRICH      | GGITDPVDSTLRDFCGQCVRREFLWWSIKQITPQQEQKSPVNTKSLFKRLYSYALHPNAFK            | 1043        |
| TURTLE       | DGIVDPVDSTLRDFCGQCIREFLWWSIKQITPQQEQKSPVNTKSLFKRLYSYALHPNAFK             | 1082        |
| ALLIGATOR    | DGIVDPVDSTLRDFCGQCIREFLWWSIKQITPQQEQKSPVNTKSLFKRLYSYALHPNAFK             | 1042        |
| SOFTCORAL    | DGIVHPTDATALRDLALALEFLRWSIKQATKNQLEKSPINIKSLLKRLYSYALHPNAFK              | 1072        |
| STONYCORAL   | DGIVHPTDATALRDFSAQCIREFLWWSIKQTSKQEQERSPMNPKRLLKRMYSLLEHPSMM             | 1090        |
| ACORN_WORM   | DGICHPTDATALRDFSAKCVKEFLYWSIKQTSKQEQERSPMNPKRLLKRMYSLLEHPSMM             | 1090        |
| LANCELET     | DGLVHPTDATALRDFSSRCVREFLWWSIKQITPQQEQKSPVNTKSLFKRLYSYALHPNAFK            | 1096        |
| SEA_URCHIN   | AGIVHPTDATALRDFCARCISREFLWWSIKQTSKQEQERSPMNPKRLLKRMYSYALHPNAFK           | 1100        |
| STARFISH     | DGVIHPTDSTLRDFSAACCLKEFLWWSIKQTSKQEQERSPMNPKRLLKRMYSYALHPNAFK            | 1096        |
|              | *: : * . * . * : * : * : * : * : * : * : * : * : * : * : * : * : * : * : |             |

**FOREHEAD**

Supplementary Figure 2: CLUSTAL OMEGA DNA-PKcs METAZOA VERTEBRATE INVERTEBRATE

|              |                                                                    |             |
|--------------|--------------------------------------------------------------------|-------------|
| TERMITE      | RLGAALVLNSVYTVLREEESVVNQFWLELLYHVMNLSLSEETDSILGGQEQVVTAVNHI        | 1095        |
| SHRIMP       | RLGGALAWNSIYREIREDDGQAVDIWTLDLLAHLMTSLDLAQVDDPALGTHEQTKSAINH       | 1118        |
| SCORPION     | RLGAALAFNSIYTFREEESLVDKFTLEIAVHFIESLAIAHYDDKILGTQDKCKQALNHL        | 1134        |
| ALVINELLA    | RLGASLAFNSIYTFREEDSLVDIFTFEIMVVFVESLAIAHQDDKSLGTQKQAKQALSHL        | 1108        |
| CAPITELLA    | RLGGALMFNSIYSVFREEDALVDQFSLQILSVLVNSLALAHRDDKSLGTQEQCKSALLHV       | 1130        |
| SPONGE       | RLGAALAFNSIYTVLREEESLVDVFIIEMLVVMVNSLKLAKDAQSI GTVDQCSLSLDHM       | 1140        |
| OYSTER       | RLGAALAFNNIYTVFREEDNAMVNLYTFQILVHFVESLAIAHEDESSMGTQTQCKMVLDMH      | 1130        |
| SNAIL        | RLGAALAFNNIYMVFREEQSLVDRFTFQILVLFVESLGIHQDEASLGTQEQCKKALEHV        | 1134        |
| TRICHOPLAX   | RLGAALAFNNIYVVLREESTLVDTFIFEILVNYVNSLALSHTDEKSLGTQEQLSKALAH        | 1119        |
| SEA_ANEMONE  | RLGASLAFNSIYTVFREERSLVDVFLIEILVYTESLALAH TDDPAQGTQDQCSQVISHL       | 1137        |
| PRIAPULA     | RRGATLVFNNIYTVLREEEMLVDTFIEILVTFVDSLALAHNDEKSLGTQEQCAQALDHI        | 1150        |
| ESHARK       | RLGAALAFNSLYREFRQESALVDQFIFEVLVYVESLALAHADDNSLGTVQCCDAIDHL         | 1138        |
| STERLET      | RLGAALSFNSIYRQFREESTLVDQFIFEELLVVFVESLALAH TDEKSLGTLQCCSDAIDHL     | 1152        |
| COELACANTH   | RLGAALAFNNLYKEFREESALVDKVFETLVVYMESLALAHMDEKSLGTVQCCDAIDHL         | 1142        |
| <b>HUMAN</b> | <b>RLGASLAFNNIYREFREEESLVEQFVFEALVIYMESLALAHADEKSLGTIQCCDAIDHL</b> | <b>1134</b> |
| CAECILIAN    | RLGAALAFNNIYREFREENALVDQFVFEILVYTESLALSHQDEKSLGTVQCCDAIDHL         | 1143        |
| PLATYPUS     | RLGAALAFNNIYREFREEDSLVDQFTFEALVIFLESALATHADEKSLGTIQCCDAIDHL        | 1136        |
| CANARY       | RLGAALAFNSIYREFREENSLVEQFVFEALVVFLESALAH TDEKSLGTAQCCDAINHL        | 1133        |
| OSTRICH      | RLGAALAFNSIYREFREENSLVEQFVFEALVVFLESALATHADEKSLGTTQCCD TINHL       | 1103        |
| TURTLE       | RLGAALAFNNIYREFREENSLVEQFVFEVLVYTESLALATHDEKSLGTVQCCDAIDHL         | 1142        |
| ALLIGATOR    | RLGAALAFNNIYREFREENSLVEQFAFEALVIFIESLALATHDEKSLGTTQCCDAIDHL        | 1102        |
| SOFTCORAL    | RLGAALAFNNIYRVFREESLVENFTIEILVYTESLEMAHEDEIISLGTQSQCIEVISHL        | 1132        |
| STONYCORAL   | RLGAALAFNNIYTVFREESLVDIFVLEILVNYLECLCLSHGDEEARGTQEQCVQVVIHL        | 1150        |
| ACORN_WORM   | RLGSALAFNSIYTVYREEDSLVDQFVLEILVYINSLAMAHFDDKSLGTQEQCVRVVDHL        | 1150        |
| LANCELET     | RLGAALGFNSIYRDFREESSQVDMFTFELLVTFVESLALAHHDEKSLGTQAQCVAVLTHL       | 1156        |
| SEA_URCHIN   | RLGAALAFNSIYTFREEEVLVDQFTFELLVVFVESLALAHHDDKSLGTQEQGSEVLKHL        | 1160        |
| STARFISH     | RLGAALTFNH IYTVFREEDSLIDQFVCEILVTFVNSLALAHHDDKSLGTQLHGVEVLNHL      | 1156        |

**FOREHEAD**

|              |                                                                        |             |
|--------------|------------------------------------------------------------------------|-------------|
| TERMITE      | ERVLKEKASLFNKE--DNIRRKPPPEFEGI----LLKDAVSWLLKCGTVQVECRHKCMELV          | 1150        |
| SHRIMP       | ERIIRVKSDLFQKK--SGQRRLLPPGFQDG----TLVDVLKWLFEQCGRPKALVRHTCMELL         | 1173        |
| SCORPION     | ERIMEVKAKLLSKT--SKKRRPLRNINDS----ILPEVVEWLLKNCGLQTECRHKCMELV           | 1189        |
| ALVINELLA    | DRIIKKKADLLSCA--SKKRRKPKYWKEA----TLQICLCWLVRCGRPQTECRHACMELV           | 1163        |
| CAPITELLA    | ERILIKKQVTFNKD--SKQRIKPRGWRDA----NMTAVRWLLRQCGRPQTECRHVCMRLV           | 1185        |
| SPONGE       | SRIIKAKSSTCLSKANKNRRVPRGLKSA----DLSILTAWLLAQCGSIE TEARKMCRKLL          | 1196        |
| OYSTER       | ERIIKVKANVLSKE--DKNRTEPKQWSVV----KLDIAVRWLMRQCGRPQTECRHACMKLV          | 1185        |
| SNAIL        | EKIVCKRVDILRKP--SPHRKEPSEWSKQ----TLDIAVRWLVRCGRPQTECRHACMQLM           | 1189        |
| TRICHOPLAX   | ERIIKAKASTLNKE--SKNRRTPTFGM--TK--TVT LHHVWNWLVRCGRPQTECRHQCMQLV        | 1176        |
| SEA_ANEMONE  | ERIIKT KATLLDKE--NKQRRIPRGFQMLD--SITLSHLIPLLIKLCGKPQTECRHQCMKV         | 1195        |
| PRIAPULA     | ERILRGKAHLLNKD--KKSRRRPKEFTDA----TLFTVGVLLQCGRPQTECRHKCMELV            | 1205        |
| ESHARK       | NRIIKQKASALNKP--IKGRVPRGFPDQ--PVS LKEVVMWLLTQCGRPQTECRHKCMVLF          | 1195        |
| STERLET      | KRIIKQKAASLNAEKTSRRRVPGRFPDQ--PVCLLDVIMWLLVQCGRPQTECRHKCMELF           | 1211        |
| COELACANTH   | KRIIEQKAPSLNKA--ATTRVPRGFSPDK--VFCLSDVVMWLLVQCGRPQTACGHKAMELF          | 1199        |
| <b>HUMAN</b> | <b>KRIIEK KHVSLNKA--KKRRLPRGFPPSA--SLCLLDLVKWL LAHCGRPQTECRHKSIELF</b> | <b>1191</b> |
| CAECILIAN    | KRIIIHKAPSLNKT--LKRRLPRGF PSTKSFCLSDLVVPWLLGQCGRPQTECRHKAIDLF          | 1201        |
| PLATYPUS     | KRIIEK KHSFNEE--KNRRLPRGF PNAR--SVRLLDLVYVWLLGQCGRPQTECRHKSIELF        | 1193        |
| CANARY       | KRIIKHKAPSLNKE--GKRRVPRGF PPTK--SVLEDIVMWLLVQCGRPQTECRHKAMELF          | 1190        |
| OSTRICH      | KRIIKHKAPSLNRA--GERRVPRGF PATK--TVCLLDIVMWLLVQCGRPETECRHKSMELF         | 1160        |
| TURTLE       | KRIIKHKAPSLNKA--EKRRIPRGFPNAK--SVCLLDIVMWLLVQCGRPQTECRHKSMELF          | 1199        |
| ALLIGATOR    | KRIIKHKAPSLNKA--EKRRIPRGFPAPAE--SLCLLDIVMWLLMMQCGRPQTECRHKSMELF        | 1159        |
| SOFTCORAL    | ERIIIVSKSSVLLNV--NKKRRVPRGF SAD--TTTLRHLPWLVKCGCSQTECRHQCMRLV          | 1189        |
| STONYCORAL   | ERIIHSRAQLLVKE--NHRRRIPRGFASQS--SITLIHMIPWLVKQCGRPSSECRHQCMRLI         | 1208        |
| ACORN_WORM   | ERIIRVKANMLNRT--SKTRRVPDRFNRDD--CPTLSHVVTWLLQCGRLQTECRHQCMILV          | 1208        |
| LANCELET     | DRIIITTKADLLNKH--SKVRRVPRGF DRES--PPTLPDLVTWLLQCGRPQTECRHRCMLV         | 1214        |
| SEA_URCHIN   | ERIMRVKAALLNKE--SKNRRVPRGLPEDC--SPTLSHMVMWLLMTCGRPQTECRHQCMVLV         | 1218        |
| STARFISH     | ERIIRVKADMLNKE--SKIRRIPREFPAGV--CPTLSMLVIWLLRQCGRAPQTECRHQCMILI        | 1214        |

**FOREHEAD**



Supplementary Figure 2: CLUSTAL OMEGA DNA-PKcs METAZOA VERTEBRATE INVERTEBRATE

|              |                                                                                                                                                                                              |             |
|--------------|----------------------------------------------------------------------------------------------------------------------------------------------------------------------------------------------|-------------|
| TERMITE      | YVLAPELLPV--CKSGSEFVSWYAAT--HSWTSIIIRIC <sup>ES</sup> SKE-----SGGITVTP <sup>TL</sup> KLHL                                                                                                    | 1201        |
| SHRIMP       | ASLAPQVKG--CASVRDFIEKYVGI--SKLSEIVDIL <sup>EGG</sup> GEEA--KMGISYVKNPTASSK                                                                                                                   | 1227        |
| SCORPION     | FQLAPCLSG--FNGCKDYFSHLET--KGGKF <sup>FL</sup> NC <sup>FE</sup> SEMSN-----TVPSF                                                                                                               | 1233        |
| ALVINELLA    | YSLSTSLPG--VKRPHDF <sup>FS</sup> SAL- <sup>IK</sup> --GD <sup>KY</sup> LL <sup>QR</sup> FE <sup>SG</sup> MYCLKEEQHGISKRPKV <sup>TDM</sup>                                                    | 1218        |
| CAPITELLA    | CQLAPCVHE--INGAREL <sup>FS</sup> VLLSQ--GNSEY <sup>FI</sup> QR <sup>FE</sup> FGMYSS--ARMGLNQKPTMSRV                                                                                          | 1239        |
| SPONGE       | VQLAPPSSN--VVNIRMWIRKTIES--EGGNY <sup>FV</sup> TR <sup>FE</sup> ESHGH-----SGILKAPT <sup>LAPA</sup>                                                                                           | 1246        |
| OYSTER       | HQLAPCITG--IKSTKDY <sup>Q</sup> TFYKS--EKASY <sup>FI</sup> NR <sup>FE</sup> EGKQQ-----KYGLLSCE <sup>MTAV</sup>                                                                               | 1236        |
| SNAIL        | YKLAPLIPG--ISSPF <sup>FD</sup> Y <sup>F</sup> KAALDI--QNASY <sup>FV</sup> VR <sup>FE</sup> EGGQV--GDRGGLCG <sup>HPT</sup> SKV                                                                | 1243        |
| TRICHOPLAX   | YGLAPQLSG--VSTIQDW <sup>V</sup> KTIIGS--SSV <sup>TF</sup> FI <sup>TR</sup> FE <sup>EGG</sup> -----SKYIGIRY <sup>QTALDI</sup>                                                                 | 1227        |
| SEA_ANEMONE  | CQVTP <sup>LLHG</sup> --IGSAAI <sup>WM</sup> KN <sup>THKE</sup> ---HDS <sup>FV</sup> VR <sup>FE</sup> EGGG---RGNGILTY <sup>PTLADM</sup>                                                      | 1246        |
| PRIAPULA     | CKLSMHQSKLPVKSAAEF <sup>FR</sup> LLLDL--HRAEY <sup>FI</sup> ER <sup>FE</sup> EAGGIP--GGAT <sup>CLS</sup> ---NQQEG <sup>F</sup>                                                               | 1259        |
| ESHARK       | YELVPLPG--NKTPSCW <sup>L</sup> ADVLKE--RGVS <sup>FL</sup> IG <sup>FE</sup> SAGSD--HAKCSGIY <sup>QPT</sup> LDL                                                                                | 1250        |
| STERLET      | YEFVPLPD--NKSPASW <sup>L</sup> DDILKK--QGV <sup>FL</sup> IS <sup>RF</sup> ESAGRE--DGGCSGIL <sup>SQT</sup> TLHD                                                                               | 1266        |
| COELACANTH   | YEFVPLPG--KKSPA <sup>AW</sup> LDEVLKK--QGV <sup>FL</sup> IQ <sup>FE</sup> EGGNT--DDR <sup>LSG</sup> IL <sup>SQ</sup> PT <sup>CDL</sup>                                                       | 1254        |
| <b>HUMAN</b> | <b>YK<sup>FV</sup>PLPG--NRSPNL<sup>WL</sup>KD<sup>VL</sup>KE--EGV<sup>SF</sup>LI<sup>NT</sup>FE<sup>EGG</sup>CG--QPSG<sup>IL</sup>AQ<sup>PT</sup>LLYL</b>                                    | <b>1244</b> |
| CAECILIAN    | CKFIPLPG--NKSPSSW <sup>L</sup> NDHLKE--EGIS <sup>FI</sup> IS <sup>RF</sup> EGGSD--GDH <sup>QSG</sup> LIA <sup>QP</sup> TL <sup>CDL</sup>                                                     | 1256        |
| PLATYPUS     | YK <sup>FV</sup> PLPG--NKSPASW <sup>L</sup> NDILKE--EGV <sup>SF</sup> LI <sup>SR</sup> FE <sup>AG</sup> TG--NDH <sup>LSG</sup> IL <sup>VW</sup> PT <sup>LLDL</sup>                           | 1248        |
| CANARY       | YEFVPLPG--NKSPSSW <sup>L</sup> ADTLKK--RTV <sup>FL</sup> LI <sup>NK</sup> FE <sup>GG</sup> TD--AKSPGIL <sup>SQ</sup> PT <sup>LHGM</sup>                                                      | 1245        |
| OSTRICH      | YEFVPLPG--NKSPSSW <sup>L</sup> ADVLKE--KGCS <sup>FL</sup> IN <sup>KF</sup> EGGGRD--ADSPSGIF <sup>SR</sup> PT <sup>LHGI</sup>                                                                 | 1215        |
| TURTLE       | YEFVPLPG--NQSPSLW <sup>L</sup> GDLLKK--QGI <sup>SF</sup> LI <sup>NK</sup> FE <sup>GG</sup> ND--GDN <sup>LSG</sup> IL <sup>SQ</sup> PT <sup>CDM</sup>                                         | 1254        |
| ALLIGATOR    | YEFVPLPG--NKSPSSW <sup>L</sup> GDVLKK--QDS <sup>SF</sup> LI <sup>NK</sup> FE <sup>GG</sup> NQ--DDN <sup>LSG</sup> IL <sup>SQ</sup> PT <sup>LHLL</sup>                                        | 1214        |
| SOFTCORAL    | SVLAPLPE--CSSV <sup>QT</sup> WM <sup>KT</sup> VES--DGEY <sup>FL</sup> IR <sup>FE</sup> ECGFA---GKSGIQ <sup>KHP</sup> TL <sup>SSI</sup>                                                       | 1241        |
| STONYCORAL   | SKLAPLLPG--VNSAADW <sup>M</sup> KK <sup>THE</sup> ---DHPS <sup>SF</sup> VH <sup>RF</sup> EGGGG---GQK <sup>IE</sup> QY <sup>PT</sup> LA <sup>HI</sup>                                         | 1260        |
| ACORN_WORM   | CKLIPLPG--NNSASTW <sup>M</sup> HRT <sup>MAE</sup> KGR <sup>GP</sup> DY <sup>FI</sup> TR <sup>FE</sup> EGGGK--GGH <sup>KTG</sup> IS <sup>KHP</sup> TL <sup>NTV</sup>                          | 1265        |
| LANCELET     | CS <sup>FL</sup> PL <sup>LP</sup> R--KPSQAW <sup>M</sup> KERLKE--DGP <sup>DF</sup> FI <sup>TR</sup> FE <sup>GG</sup> GK--TG <sup>HKS</sup> G <sup>IK</sup> K <sup>HP</sup> K <sup>ISTM</sup> | 1269        |
| SEA_URCHIN   | YGLTSLPG--RNTPATW <sup>M</sup> QNTARE--RGAEY <sup>FV</sup> GR <sup>FE</sup> EGGGHK-----SGIQ <sup>KQ</sup> PT <sup>LASV</sup>                                                                 | 1269        |
| STARFISH     | YKITPLPG--HNTPTW <sup>M</sup> QNTLKE--KGP <sup>DY</sup> FV <sup>SR</sup> FE <sup>GG</sup> VK--AAS <sup>RS</sup> G <sup>IS</sup> KY <sup>PT</sup> LT <sup>STM</sup>                           | 1269        |

FOREHEAD

|              |                                                                                                                                                                                                                                                                             |             |
|--------------|-----------------------------------------------------------------------------------------------------------------------------------------------------------------------------------------------------------------------------------------------------------------------------|-------------|
| TERMITE      | RNEVALVYVVRWLRMVLTS <sup>FD</sup> CY <sup>VW</sup> LFGEELVKPSVLWGTEGLDNTSETRIFEA <sup>AVY</sup> FI <sup>Q</sup>                                                                                                                                                             | 1261        |
| SHRIMP       | HIGSSLKDINIFLEALSAS <sup>LD</sup> GY <sup>CW</sup> LIGQGI <sup>V</sup> PAAKLLNHSE-----LQL <sup>FS</sup> AT <sup>TY</sup> FI <sup>N</sup>                                                                                                                                    | 1281        |
| SCORPION     | NQNDGLKPIINWLEGLHTMLDCY <sup>YW</sup> VFGQSVLKLSDIFNDAS---NRESK <sup>FF</sup> PSI <sup>EF</sup> FL <sup>K</sup>                                                                                                                                                             | 1290        |
| ALVINELLA    | CDR <sup>F</sup> AL <sup>KSV</sup> L <sup>TW</sup> FDYLLCT <sup>LD</sup> CY <sup>TW</sup> IFGQSLINPSRILVVPD---EKGT <sup>VL</sup> FT <sup>VL</sup> SY <sup>FFD</sup>                                                                                                         | 1275        |
| CAPITELLA    | QENFSLNAACT <sup>WF</sup> DLV <sup>LAT</sup> LD <sup>CY</sup> TW <sup>FG</sup> ERLMSPNQILIASN---NKG <sup>TI</sup> IF <sup>QV</sup> LH <sup>HF</sup> ME                                                                                                                      | 1296        |
| SPONGE       | ---PNINIAINW <sup>LQ</sup> S <sup>LQA</sup> AVD <sup>NR</sup> W <sup>L</sup> LKEQ <sup>YV</sup> SPRE <sup>IFS</sup> S <sup>TS</sup> -----SSN <sup>LF</sup> K <sup>S</sup> ID <sup>H</sup> FL <sup>K</sup>                                                                   | 1298        |
| OYSTER       | DSSF <sup>S</sup> VQNAV <sup>S</sup> W <sup>FD</sup> H <sup>YLA</sup> ALD <sup>CY</sup> I <sup>W</sup> TFGESLNPDDIFSGEG---RKQ <sup>S</sup> K <sup>L</sup> LQ <sup>AM</sup> Q <sup>H</sup> FL <sup>S</sup>                                                                   | 1293        |
| SNAIL        | AEN <sup>FS</sup> L <sup>KAV</sup> LS <sup>WF</sup> D <sup>MLLA</sup> V <sup>LD</sup> CY <sup>CW</sup> VFGEGLLSPAKMFESSG---FKG <sup>TR</sup> V <sup>FSS</sup> LQ <sup>Y</sup> F <sup>V</sup> T                                                                              | 1300        |
| TRICHOPLAX   | SDTFNLRSMKNWYDYFLAALD <sup>CY</sup> SW <sup>VF</sup> SEK <sup>MS</sup> PEQIIGDKAQ---LG <sup>SCK</sup> IF <sup>GS</sup> IE <sup>FF</sup> FL <sup>S</sup>                                                                                                                     | 1285        |
| SEA_ANEMONE  | GGAF <sup>SL</sup> K <sup>ET</sup> LL <sup>WF</sup> H <sup>YLLA</sup> ALD <sup>CY</sup> TW <sup>VF</sup> GEQLPPADLLRSKY-----SSV <sup>LF</sup> T <sup>SL</sup> S <sup>Y</sup> FL <sup>S</sup>                                                                                | 1301        |
| PRIAPULA     | EAPIS <sup>M</sup> T <sup>TAL</sup> S <sup>WF</sup> D <sup>HMLA</sup> ILD <sup>CY</sup> TW <sup>VS</sup> AKLLQPTALFAGGTG--KREERTCFAMVSD <sup>FMR</sup>                                                                                                                      | 1318        |
| ESHARK       | QEP <sup>FS</sup> V <sup>RAAL</sup> Q <sup>WMD</sup> M <sup>LLA</sup> ALD <sup>CY</sup> NT <sup>FV</sup> RLAMV <sup>KP</sup> SELLGTSQ---ETG <sup>FM</sup> K <sup>AMN</sup> F <sup>FL</sup> K                                                                                | 1305        |
| STERLET      | QEP <sup>FS</sup> L <sup>RAV</sup> LQ <sup>WMD</sup> M <sup>LLA</sup> ALD <sup>CY</sup> NT <sup>FI</sup> GLHLV <sup>KP</sup> HEV <sup>LGA</sup> KV---QSG <sup>FL</sup> KA <sup>IE</sup> F <sup>FI</sup> T                                                                   | 1321        |
| COELACANTH   | QEP <sup>FS</sup> L <sup>RAV</sup> VQ <sup>WMD</sup> M <sup>LLA</sup> ALD <sup>CY</sup> NT <sup>FI</sup> ELRM <sup>IN</sup> PRE <sup>IF</sup> GTTS---VSG <sup>FL</sup> RA <sup>VE</sup> F <sup>FL</sup> T                                                                   | 1309        |
| <b>HUMAN</b> | <b>RG<sup>PF</sup>SL<sup>QAT</sup>LC<sup>WLD</sup>LLLAALD<sup>CY</sup>NT<sup>FI</sup>GERT<sup>VGA</sup>LQ<sup>VL</sup>GTEA-----QSS<sup>LL</sup>K<sup>AV</sup>A<sup>VF</sup>FL<sup>E</sup></b>                                                                               | <b>1299</b> |
| CAECILIAN    | KEP <sup>FS</sup> L <sup>RAV</sup> VQ <sup>WMD</sup> M <sup>FLA</sup> ALD <sup>CY</sup> NT <sup>FI</sup> WMRA <sup>IK</sup> PNE <sup>IL</sup> STTT---QSS <sup>FL</sup> RT <sup>CE</sup> F <sup>FL</sup> Q                                                                   | 1311        |
| PLATYPUS     | EGP <sup>FS</sup> L <sup>RAV</sup> LQ <sup>WMD</sup> M <sup>LLA</sup> SL <sup>ECY</sup> NT <sup>FI</sup> E <sup>EKT</sup> V <sup>KA</sup> HE <sup>IL</sup> GTQA---KSS <sup>FL</sup> RA <sup>IS</sup> F <sup>FL</sup> E                                                      | 1303        |
| CANARY       | QEP <sup>FS</sup> L <sup>QAV</sup> MQ <sup>WMD</sup> M <sup>FLA</sup> ALD <sup>CY</sup> NT <sup>FF</sup> ELQ <sup>MI</sup> K <sup>P</sup> DEV <sup>LGV</sup> NE---SS <sup>FL</sup> K <sup>AV</sup> Q <sup>F</sup> FL <sup>D</sup>                                           | 1300        |
| OSTRICH      | QEP <sup>FS</sup> L <sup>R</sup> TV <sup>MQ</sup> W <sup>MD</sup> M <sup>FLA</sup> ALD <sup>CY</sup> NT <sup>FF</sup> ELR <sup>MI</sup> K <sup>P</sup> HE <sup>IL</sup> GVNE---RSS <sup>FL</sup> K <sup>AV</sup> R <sup>F</sup> FL <sup>E</sup>                             | 1270        |
| TURTLE       | QEP <sup>FS</sup> L <sup>RAV</sup> VQ <sup>WMD</sup> M <sup>FLA</sup> ALD <sup>CY</sup> NT <sup>FI</sup> EQ <sup>MI</sup> K <sup>P</sup> NE <sup>IL</sup> GTKM---RSS <sup>FL</sup> RA <sup>VE</sup> F <sup>FL</sup> K                                                       | 1309        |
| ALLIGATOR    | QEP <sup>FS</sup> V <sup>RAV</sup> VQ <sup>WMD</sup> M <sup>LLA</sup> ALD <sup>CY</sup> NT <sup>FI</sup> EQ <sup>RM</sup> F <sup>K</sup> PEN <sup>V</sup> LGTN-----SS <sup>FL</sup> RA <sup>VE</sup> F <sup>FL</sup> E                                                      | 1267        |
| SOFTCORAL    | NET <sup>FS</sup> L <sup>TT</sup> TK <sup>H</sup> W <sup>FD</sup> L <sup>VLA</sup> ALD <sup>SY</sup> I <sup>W</sup> S <sup>FG</sup> RL <sup>LT</sup> PS <sup>SIF</sup> Q <sup>KT</sup> ----TSV <sup>L</sup> WR <sup>T</sup> LL <sup>Y</sup> FI <sup>E</sup>                 | 1296        |
| STONYCORAL   | GGH <sup>FS</sup> L <sup>KET</sup> IL <sup>WF</sup> E <sup>FVLA</sup> ALD <sup>CY</sup> TW <sup>SF</sup> SEHLLSPSW <sup>V</sup> FTSSED--NEMPSVLLV <sup>SL</sup> K <sup>F</sup> FL <sup>S</sup>                                                                              | 1319        |
| ACORN_WORM   | DKT <sup>FS</sup> V <sup>KVAS</sup> N <sup>W</sup> FDL <sup>FLA</sup> ALD <sup>CY</sup> TW <sup>VF</sup> GEKLLGPIELFAGKA---NKPT <sup>N</sup> V <sup>FKS</sup> V <sup>D</sup> F <sup>FLS</sup>                                                                               | 1322        |
| LANCELET     | DST <sup>FT</sup> V <sup>KTA</sup> V <sup>S</sup> W <sup>FD</sup> LLLAALD <sup>SY</sup> C <sup>W</sup> V <sup>FG</sup> Q <sup>R</sup> FL <sup>SP</sup> SD <sup>V</sup> LSGSG---KK <sup>PS</sup> Q <sup>L</sup> F <sup>T</sup> A <sup>L</sup> E <sup>FF</sup> L <sup>T</sup> | 1326        |
| SEA_URCHIN   | EQQ <sup>FS</sup> V <sup>KATI</sup> T <sup>W</sup> LEY <sup>LLA</sup> ALD <sup>CY</sup> V <sup>VW</sup> L <sup>GES</sup> LLTPAAV <sup>F</sup> K <sup>T</sup> IK---GK <sup>KS</sup> V <sup>L</sup> F <sup>Q</sup> T <sup>IDS</sup> F <sup>MK</sup>                           | 1327        |
| STARFISH     | GQP <sup>FS</sup> V <sup>KLAC</sup> S <sup>WF</sup> D <sup>HLLA</sup> ALD <sup>CY</sup> TW <sup>VF</sup> GEKLLSPSV <sup>V</sup> YTATA---RR <sup>PS</sup> V <sup>L</sup> F <sup>Q</sup> S <sup>L</sup> Q <sup>Y</sup> FL <sup>S</sup>                                        | 1326        |

FOREHEAD



Supplementary Figure 2: CLUSTAL OMEGA DNA-PKcs METAZOA VERTEBRATE INVERTEBRATE

|              |                                                                                                                                                                                                                                                                                                                       |             |
|--------------|-----------------------------------------------------------------------------------------------------------------------------------------------------------------------------------------------------------------------------------------------------------------------------------------------------------------------|-------------|
| TERMITE      | HVCHRDASSVTCLLSTDTK----DVLEITPW <b>E</b> AESFDR <b>T</b> KCFVVTIRLLD <b>M</b> ISTV <b>L</b> KS <b>G</b> EA                                                                                                                                                                                                            | 1317        |
| SHRIMP       | EMALLTVSEYMKNHDAF-----QNAVATPY <b>E</b> TEATA <b>K</b> LKCTVIVRLLD <b>F</b> VSV <b>V</b> LQ <b>E</b> GP <b>K</b>                                                                                                                                                                                                      | 1335        |
| SCORPION     | FLCIDFDQRVQAFFTHES----VKKQIFSP <b>K</b> EDYLR <b>L</b> NC <b>F</b> IIVRLIN <b>F</b> VTT <b>I</b> VEN <b>Y</b> H <b>L</b>                                                                                                                                                                                              | 1346        |
| ALVINELLA    | KLAQGDIEKAAVLFGDK-----PQQIFTPW <b>E</b> QEEY <b>N</b> RS <b>K</b> CTVIVRTID <b>F</b> L <b>V</b> V <b>L</b> L <b>K</b> NY <b>Q</b>                                                                                                                                                                                     | 1329        |
| CAPITELLA    | ELAQEDISAAVKLFPKVAD----GSSIFTP <b>R</b> ERED <b>Y</b> N <b>Q</b> T <b>K</b> CTVIVR <b>T</b> LS <b>F</b> ICT <b>M</b> F <b>G</b> NY <b>K</b> T                                                                                                                                                                         | 1352        |
| SPONGE       | CIALVGIEGVVNSPE-----VAMATSI <b>H</b> ER <b>G</b> EY <b>Q</b> R <b>N</b> K <b>W</b> CTIE <b>L</b> LL <b>T</b> F <b>I</b> E <b>L</b> LL <b>T</b> K <b>T</b> HS                                                                                                                                                          | 1350        |
| OYSTER       | QVVMEDMDEVGKMRHEP----LTDVYTP <b>K</b> ERDE <b>Y</b> NR <b>T</b> K <b>C</b> TAVV <b>R</b> T <b>L</b> N <b>F</b> FC <b>V</b> L <b>V</b> AR <b>S</b> PS                                                                                                                                                                  | 1348        |
| SNAIL        | EMALGDLVAAKQFQRKA----EAVFFTP <b>K</b> E <b>K</b> DD <b>Y</b> N <b>K</b> V <b>K</b> CTV <b>L</b> IR <b>M</b> W <b>N</b> F <b>L</b> T <b>V</b> L <b>I</b> AR <b>Y</b> PS                                                                                                                                                | 1355        |
| TRICHOPLAX   | KLCLHSLDET <b>V</b> KLL <b>Y</b> SK-S----TLQL <b>F</b> TP <b>R</b> E <b>I</b> E <b>E</b> Y <b>N</b> M <b>C</b> K <b>T</b> TIV <b>R</b> LIN <b>F</b> LAV <b>L</b> L <b>Q</b> MS <b>P</b> T                                                                                                                             | 1340        |
| SEA_ANEMONE  | NLAMLGIQAAIKCFPK <b>T</b> TH----ITDVAT <b>P</b> K <b>E</b> MDE <b>Y</b> NR <b>V</b> K <b>C</b> TVIVR <b>I</b> M <b>N</b> F <b>F</b> TV <b>L</b> L <b>Q</b> AY <b>P</b> D                                                                                                                                              | 1357        |
| PRIAPULA     | PSGEERR-----RRRRWADRRRH <b>V</b> HP <b>E</b> ME <b>K</b> Y <b>N</b> RS <b>K</b> CM <b>V</b> IR <b>A</b> MD <b>L</b> F <b>S</b> IL <b>L</b> N <b>M</b> A--                                                                                                                                                             | 1366        |
| ESHARK       | TLARHDITAAEECF <b>T</b> L <b>G</b> V----K <b>G</b> V <b>L</b> F <b>S</b> PR <b>E</b> RE <b>E</b> Y <b>N</b> Y <b>C</b> K <b>T</b> I <b>I</b> V <b>R</b> IME <b>F</b> AC <b>L</b> I <b>L</b> E <b>G</b> L <b>Q</b>                                                                                                     | 1360        |
| STERLET      | ELAVQDISAAELCF <b>S</b> VG <b>P</b> ----K <b>G</b> AL <b>F</b> SP <b>R</b> E <b>R</b> E <b>D</b> Y <b>N</b> Y <b>S</b> K <b>T</b> I <b>I</b> V <b>R</b> MM <b>F</b> V <b>S</b> M <b>V</b> LE <b>N</b> C <b>Q</b> P                                                                                                    | 1376        |
| COELACANTH   | RLATQDITAAEQCF <b>T</b> AG <b>S</b> ----K <b>D</b> TM <b>F</b> SP <b>R</b> E <b>R</b> E <b>D</b> Y <b>S</b> Y <b>S</b> K <b>C</b> T <b>I</b> I <b>V</b> R <b>I</b> L <b>T</b> F <b>V</b> S <b>M</b> V <b>L</b> E <b>K</b> C <b>Q</b> P                                                                                | 1364        |
| <b>HUMAN</b> | <b>S</b> I <b>A</b> M <b>H</b> D <b>I</b> I <b>A</b> A <b>E</b> K <b>F</b> G <b>T</b> G <b>A</b> ---- <b>A</b> G <b>N</b> R <b>T</b> SP <b>R</b> E <b>G</b> E <b>R</b> Y <b>N</b> Y <b>S</b> K <b>C</b> T <b>V</b> V <b>V</b> R <b>I</b> M <b>E</b> F <b>T</b> T <b>L</b> L <b>N</b> T <b>S</b> -- <b>P</b>           | <b>1353</b> |
| CAECILIAN    | KLCLHDITAAEQCF <b>R</b> T <b>G</b> P----S <b>G</b> N <b>I</b> AS <b>P</b> Q <b>R</b> E <b>D</b> Y <b>N</b> Y <b>S</b> K <b>C</b> T <b>I</b> I <b>V</b> R <b>I</b> M <b>E</b> F <b>V</b> S <b>M</b> I <b>L</b> E <b>N</b> C <b>Q</b>                                                                                   | 1366        |
| PLATYPUS     | RIAFHDITAAEQCF <b>G</b> T <b>G</b> S----K <b>G</b> S <b>M</b> F <b>S</b> P <b>Q</b> E <b>R</b> E <b>E</b> Y <b>N</b> Y <b>S</b> K <b>C</b> T <b>I</b> I <b>V</b> R <b>I</b> M <b>E</b> F <b>A</b> T <b>M</b> L <b>L</b> N <b>T</b> Y-- <b>Q</b>                                                                       | 1357        |
| CANARY       | TIALHDIHAAEQCF <b>D</b> S <b>S</b> ----K <b>G</b> S <b>M</b> F <b>S</b> P <b>Q</b> E <b>R</b> E <b>D</b> Y <b>N</b> Y <b>S</b> K <b>C</b> T <b>I</b> I <b>V</b> R <b>I</b> L <b>E</b> F <b>V</b> T <b>V</b> I <b>L</b> E <b>M</b> C <b>Q</b>                                                                          | 1355        |
| OSTRICH      | TIALHDIQAAEQCF <b>D</b> C <b>L</b> ----K <b>G</b> S <b>V</b> F <b>S</b> P <b>Q</b> E <b>R</b> E <b>V</b> Y <b>N</b> Y <b>S</b> K <b>C</b> T <b>I</b> I <b>V</b> R <b>S</b> M <b>E</b> F <b>V</b> T <b>M</b> V <b>L</b> E <b>S</b> C <b>Q</b>                                                                          | 1325        |
| TURTLE       | TIVLHDISAAERCF <b>D</b> T <b>G</b> S----K <b>G</b> N <b>M</b> F <b>S</b> P <b>Q</b> E <b>R</b> E <b>E</b> Y <b>N</b> Y <b>S</b> K <b>C</b> T <b>I</b> I <b>V</b> R <b>I</b> M <b>A</b> F <b>V</b> S <b>M</b> I <b>L</b> E <b>T</b> C <b>Q</b>                                                                         | 1364        |
| ALLIGATOR    | TIALHDIHAAEQCF <b>F</b> Y <b>T</b> S----K <b>D</b> N <b>V</b> F <b>S</b> P <b>Q</b> E <b>R</b> E <b>E</b> Y <b>S</b> Y <b>S</b> K <b>C</b> T <b>I</b> V <b>V</b> R <b>I</b> R <b>F</b> V <b>S</b> M <b>I</b> L <b>E</b> T <b>C</b> Q                                                                                  | 1322        |
| SOFTCORAL    | KL <b>S</b> L <b>N</b> G <b>I</b> E <b>K</b> A <b>F</b> E <b>C</b> F <b>P</b> T <b>S</b> D <b>G</b> --V <b>N</b> T <b>H</b> A <b>F</b> SP <b>S</b> E <b>I</b> Q <b>E</b> Y <b>N</b> R <b>A</b> K <b>C</b> T <b>V</b> L <b>V</b> R <b>I</b> I <b>A</b> F <b>I</b> T <b>L</b> L <b>L</b> Q <b>M</b> N <b>A</b> K        | 1354        |
| STONYCORAL   | HLAMFGITEAT <b>S</b> CF <b>T</b> S <b>G</b> PS--R <b>G</b> M <b>G</b> D <b>I</b> FP <b>K</b> E <b>I</b> D <b>D</b> Y <b>F</b> R <b>A</b> K <b>C</b> T <b>V</b> I <b>V</b> R <b>V</b> L <b>N</b> F <b>L</b> T <b>I</b> L <b>L</b> Q <b>D</b> FP <b>Q</b>                                                               | 1377        |
| ACORN_WORM   | KL <b>A</b> L <b>E</b> D <b>V</b> Y <b>A</b> A <b>A</b> K <b>I</b> T <b>S</b> S----A <b>G</b> L <b>I</b> F <b>T</b> PR <b>E</b> I <b>D</b> D <b>Y</b> N <b>K</b> Y <b>K</b> T <b>A</b> I <b>V</b> R <b>L</b> L <b>D</b> F <b>I</b> S <b>V</b> L <b>L</b> A <b>V</b> H <b>T</b> K                                      | 1377        |
| LANCELET     | KL <b>A</b> L <b>S</b> D <b>I</b> D <b>A</b> A <b>A</b> R <b>C</b> F <b>E</b> SH <b>G</b> ----A <b>A</b> T <b>L</b> F <b>T</b> PR <b>E</b> T <b>E</b> D <b>Y</b> N <b>Y</b> K <b>C</b> T <b>V</b> I <b>V</b> R <b>I</b> M <b>D</b> F <b>F</b> TV <b>L</b> L <b>G</b> AF <b>P</b>                                      | 1381        |
| SEA_URCHIN   | VA <b>Q</b> -Y <b>D</b> L <b>F</b> A <b>F</b> A <b>K</b> -----G <b>C</b> G <b>S</b> M <b>E</b> T <b>A</b> F <b>T</b> PR <b>E</b> E <b>D</b> Y <b>N</b> R <b>T</b> K <b>C</b> T <b>V</b> I <b>I</b> R <b>L</b> F <b>Y</b> F <b>M</b> G <b>A</b> M <b>L</b> G <b>S</b> H <b>T</b> K                                     | 1379        |
| STARFISH     | SL <b>S</b> L <b>L</b> D <b>I</b> T <b>G</b> A <b>A</b> R <b>G</b> I <b>E</b> Y <b>G</b> S <b>K</b> T <b>S</b> A <b>F</b> H <b>Q</b> V <b>F</b> TP <b>R</b> E <b>S</b> E <b>Y</b> N <b>Q</b> E <b>K</b> C <b>T</b> V <b>I</b> V <b>R</b> L <b>W</b> D <b>F</b> L <b>T</b> V <b>L</b> L <b>E</b> N <b>Y</b> A <b>S</b> | 1386        |

\* : : : .

M-HEAT/CIRCULAR CRADLE

|              |                                                                                                                                                                                                                                                                                                                                   |             |
|--------------|-----------------------------------------------------------------------------------------------------------------------------------------------------------------------------------------------------------------------------------------------------------------------------------------------------------------------------------|-------------|
| TERMITE      | -----GCLPHSLLNL <b>Q</b> L <b>W</b> Q <b>L</b> I <b>V</b> AC <b>V</b> L <b>H</b> P <b>G</b> S <b>L</b> G <b>F</b> D <b>L</b> Y <b>N</b> T <b>E</b> V <b>T</b> D <b>G</b> L <b>P</b> K <b>N</b> I <b>Q</b> L <b>L</b> G <b>V</b> L <b>Q</b> E <b>T</b> L <b>P</b>                                                                  | 1372        |
| SHRIMP       | V--ASLLSQHSVWSAT <b>M</b> FS <b>L</b> I <b>T</b> C <b>C</b> T <b>L</b> D <b>P</b> AS <b>V</b> G <b>F</b> D <b>I</b> K <b>D</b> TE <b>V</b> S <b>K</b> H <b>L</b> PS <b>R</b> LEE <b>I</b> L <b>G</b> I <b>L</b> A <b>R</b> R <b>G</b> P                                                                                           | 1393        |
| SCORPION     | Q---LNTIPST <b>F</b> WS <b>I</b> N <b>F</b> W <b>N</b> C <b>I</b> Y <b>S</b> S <b>V</b> L <b>N</b> P <b>K</b> F <b>L</b> G <b>F</b> D <b>M</b> T <b>D</b> T <b>Y</b> I <b>F</b> N <b>Q</b> F <b>P</b> K <b>E</b> T <b>R</b> T <b>L</b> L <b>K</b> V <b>F</b> Y <b>E</b> Y <b>M</b> P                                              | 1403        |
| ALVINELLA    | D--SLKVIPDD <b>F</b> WSD <b>S</b> L <b>W</b> Q <b>T</b> L <b>A</b> S <b>C</b> V <b>L</b> T <b>P</b> SS <b>I</b> G <b>F</b> N <b>M</b> A <b>N</b> M <b>E</b> I <b>L</b> E <b>K</b> L <b>P</b> L <b>Q</b> T <b>Q</b> L <b>L</b> T <b>I</b> L <b>K</b> Q <b>L</b> P                                                                  | 1387        |
| CAPITELLA    | E--SLKVIP <b>S</b> FWSS <b>N</b> L <b>W</b> D <b>T</b> L <b>L</b> L <b>A</b> V <b>L</b> Q <b>P</b> T <b>Q</b> L <b>G</b> F <b>N</b> M <b>G</b> Q <b>V</b> E <b>M</b> N <b>H</b> L <b>P</b> E <b>Q</b> T <b>L</b> G <b>T</b> L <b>Q</b> I <b>L</b> M <b>R</b> S <b>L</b> P                                                         | 1410        |
| SPONGE       | ET <b>V</b> S <b>F</b> E <b>Y</b> V <b>P</b> D <b>S</b> L <b>S</b> W <b>S</b> Q <b>L</b> Y <b>T</b> I <b>V</b> M <b>D</b> S <b>L</b> F <b>Y</b> S <b>S</b> L <b>V</b> N <b>T</b> A <b>P</b> D <b>D</b> P <b>S</b> T <b>A</b> K <b>R</b> I <b>S</b> E <b>A</b> A <b>V</b> S <b>C</b> L <b>T</b> A <b>M</b> C <b>T</b> S <b>L</b> P | 1410        |
| OYSTER       | S--VKKLL <b>P</b> SE <b>I</b> L <b>G</b> K <b>D</b> L <b>W</b> N <b>L</b> I <b>S</b> M <b>C</b> V <b>L</b> Q <b>P</b> S <b>A</b> V <b>G</b> F <b>N</b> L <b>G</b> D <b>V</b> E <b>I</b> I <b>K</b> N <b>L</b> P <b>T</b> E <b>M</b> E <b>Q</b> L <b>L</b> K <b>V</b> L <b>N</b> A <b>K</b> L <b>Q</b>                             | 1406        |
| SNAIL        | E--AFK <b>V</b> I <b>P</b> Q <b>T</b> L <b>F</b> C <b>D</b> D <b>L</b> W <b>R</b> L <b>C</b> I <b>R</b> C <b>V</b> V <b>Q</b> P <b>S</b> S <b>V</b> G <b>F</b> N <b>M</b> G <b>D</b> I <b>E</b> I <b>T</b> K <b>L</b> P <b>H</b> E <b>M</b> M <b>Q</b> V <b>L</b> K <b>V</b> L <b>S</b> K <b>Q</b> L <b>P</b>                     | 1413        |
| TRICHOPLAX   | S--I <b>I</b> E <b>G</b> I <b>P</b> R <b>Q</b> I <b>W</b> S <b>Q</b> N <b>L</b> F <b>E</b> M <b>I</b> F <b>L</b> C <b>I</b> L <b>T</b> P <b>H</b> Q <b>L</b> G <b>F</b> N <b>V</b> G <b>D</b> I <b>E</b> V <b>L</b> E <b>K</b> L <b>P</b> Q <b>Q</b> M <b>K</b> D <b>V</b> C <b>G</b> L <b>F</b> Q <b>M</b> K <b>L</b> P          | 1398        |
| SEA_ANEMONE  | Q--G <b>F</b> K <b>I</b> V <b>P</b> T <b>S</b> L <b>S</b> W <b>D</b> D <b>L</b> F <b>T</b> V <b>V</b> F <b>S</b> C <b>A</b> L <b>E</b> P <b>A</b> L <b>I</b> G <b>F</b> N <b>V</b> G <b>D</b> V <b>E</b> V <b>I</b> E <b>K</b> L <b>P</b> E <b>Q</b> V <b>S</b> M <b>T</b> E <b>A</b> A <b>W</b> H <b>I</b> S <b>M</b> F          | 1415        |
| PRIAPULA     | ---S <b>L</b> Q <b>V</b> I <b>P</b> D <b>S</b> T <b>W</b> S <b>M</b> E <b>L</b> W <b>D</b> V <b>V</b> L <b>S</b> V <b>L</b> D <b>P</b> T <b>R</b> V <b>G</b> F <b>N</b> M <b>A</b> D <b>I</b> E <b>V</b> E <b>K</b> L <b>P</b> E <b>Q</b> T <b>E</b> R <b>L</b> L <b>I</b> A <b>L</b> S <b>W</b> K <b>L</b> P                     | 1423        |
| ESHARK       | D--CW <b>K</b> V <b>L</b> E <b>K</b> D <b>L</b> L <b>N</b> S <b>D</b> L <b>F</b> E <b>L</b> I <b>A</b> M <b>V</b> I <b>D</b> P <b>T</b> S <b>I</b> G <b>F</b> N <b>M</b> A <b>D</b> V <b>Q</b> V <b>M</b> K <b>N</b> L <b>P</b> N <b>V</b> C <b>V</b> L <b>L</b> N <b>A</b> V <b>M</b> K <b>S</b> --                              | 1416        |
| STERLET      | E--FW <b>K</b> L <b>L</b> E <b>Q</b> N <b>I</b> L <b>N</b> P <b>T</b> F <b>F</b> E <b>L</b> I <b>T</b> T <b>T</b> V <b>C</b> D <b>P</b> S <b>S</b> I <b>G</b> F <b>N</b> M <b>A</b> D <b>V</b> E <b>V</b> M <b>K</b> N <b>L</b> P <b>D</b> I <b>C</b> V <b>R</b> L <b>L</b> K <b>A</b> L <b>A</b> K <b>S</b> --                   | 1432        |
| COELACANTH   | D--L <b>W</b> K <b>V</b> L <b>E</b> K <b>D</b> L <b>L</b> T <b>P</b> A <b>L</b> L <b>E</b> L <b>T</b> V <b>R</b> T <b>V</b> C <b>E</b> P <b>A</b> S <b>I</b> G <b>F</b> N <b>T</b> A <b>D</b> V <b>Q</b> V <b>M</b> K <b>N</b> L <b>P</b> E <b>I</b> C <b>V</b> R <b>L</b> L <b>K</b> A <b>L</b> M <b>K</b> S--                   | 1420        |
| <b>HUMAN</b> | <b>E</b> -- <b>G</b> W <b>K</b> L <b>L</b> K <b>K</b> D <b>L</b> C <b>N</b> T <b>H</b> L <b>M</b> R <b>V</b> L <b>V</b> Q <b>T</b> L <b>C</b> E <b>P</b> A <b>S</b> I <b>G</b> F <b>N</b> I <b>G</b> D <b>V</b> Q <b>V</b> M <b>A</b> H <b>L</b> P <b>D</b> V <b>C</b> V <b>N</b> L <b>M</b> K <b>A</b> L <b>K</b> M <b>S</b> --  | <b>1409</b> |
| CAECILIAN    | D--F <b>W</b> R <b>L</b> L <b>E</b> K <b>D</b> L <b>L</b> N <b>N</b> N <b>L</b> V <b>E</b> L <b>T</b> V <b>L</b> T <b>V</b> C <b>D</b> P <b>S</b> S <b>I</b> G <b>F</b> N <b>V</b> A <b>D</b> V <b>Q</b> V <b>M</b> K <b>N</b> L <b>P</b> D <b>V</b> C <b>I</b> K <b>L</b> L <b>K</b> G <b>L</b> M <b>K</b> S--                   | 1422        |
| PLATYPUS     | D--T <b>W</b> K <b>L</b> L <b>E</b> K <b>D</b> L <b>L</b> N <b>A</b> T <b>F</b> M <b>E</b> L <b>V</b> V <b>E</b> I <b>V</b> C <b>D</b> P <b>S</b> S <b>I</b> G <b>F</b> N <b>V</b> A <b>D</b> V <b>Q</b> V <b>M</b> S <b>N</b> L <b>P</b> D <b>V</b> C <b>V</b> S <b>V</b> M <b>K</b> A <b>L</b> K <b>S</b> --                    | 1413        |
| CANARY       | D--F <b>W</b> K <b>L</b> L <b>E</b> K <b>E</b> L <b>L</b> N <b>A</b> S <b>F</b> I <b>E</b> L <b>V</b> M <b>T</b> V <b>C</b> D <b>P</b> SH <b>V</b> G <b>F</b> N <b>T</b> A <b>D</b> V <b>Q</b> V <b>M</b> K <b>K</b> L <b>P</b> D <b>I</b> S <b>V</b> R <b>L</b> M <b>K</b> A <b>L</b> M <b>K</b> S--                             | 1411        |
| OSTRICH      | D--F <b>W</b> K <b>L</b> L <b>E</b> K <b>E</b> L <b>L</b> N <b>A</b> S <b>F</b> I <b>E</b> L <b>L</b> V <b>M</b> T <b>V</b> C <b>D</b> PS <b>H</b> V <b>G</b> F <b>N</b> T <b>A</b> D <b>V</b> Q <b>V</b> M <b>K</b> N <b>L</b> P <b>D</b> I <b>S</b> V <b>R</b> L <b>M</b> K <b>A</b> L <b>M</b> K <b>S</b> --                   | 1381        |
| TURTLE       | D--F <b>W</b> K <b>L</b> L <b>E</b> K <b>E</b> L <b>L</b> N <b>A</b> N <b>L</b> I <b>E</b> L <b>L</b> V <b>R</b> I <b>V</b> C <b>D</b> P <b>A</b> N <b>I</b> G <b>F</b> N <b>T</b> A <b>D</b> V <b>Q</b> V <b>M</b> K <b>N</b> L <b>P</b> D <b>V</b> S <b>V</b> R <b>L</b> I <b>K</b> A <b>L</b> M <b>K</b> S--                   | 1420        |
| ALLIGATOR    | D--F <b>W</b> K <b>L</b> L <b>E</b> K <b>E</b> L <b>L</b> N <b>L</b> N <b>L</b> I <b>E</b> L <b>L</b> V <b>V</b> T <b>V</b> C <b>D</b> PS <b>A</b> V <b>G</b> F <b>N</b> T <b>A</b> D <b>V</b> Q <b>V</b> M <b>K</b> N <b>L</b> P <b>D</b> N <b>T</b> V <b>R</b> L <b>M</b> K <b>A</b> L <b>A</b> K <b>T</b> --                   | 1378        |
| SOFTCORAL    | E--Y <b>L</b> E <b>I</b> V <b>P</b> S <b>E</b> L <b>W</b> T <b>G</b> K <b>F</b> F <b>E</b> A <b>L</b> C <b>T</b> S <b>V</b> L <b>E</b> P <b>Q</b> S <b>L</b> G <b>F</b> N <b>V</b> A <b>D</b> L <b>E</b> V <b>L</b> E <b>K</b> L <b>P</b> E <b>Q</b> T <b>F</b> E <b>L</b> C <b>K</b> S <b>L</b> A <b>S</b> K <b>L</b> P          | 1412        |
| STONYCORAL   | E--T <b>L</b> K <b>T</b> L <b>P</b> P <b>E</b> F <b>W</b> S <b>E</b> D <b>L</b> F <b>E</b> V <b>V</b> L <b>S</b> C <b>V</b> L <b>E</b> P <b>G</b> V <b>V</b> G <b>F</b> H <b>M</b> G <b>D</b> V <b>E</b> V <b>E</b> K <b>L</b> P <b>E</b> Q <b>T</b> G <b>V</b> L <b>C</b> K <b>L</b> L <b>V</b> Q <b>R</b> L <b>S</b>            | 1435        |
| ACORN_WORM   | D--L <b>S</b> K <b>S</b> I <b>P</b> L <b>S</b> F <b>W</b> S <b>T</b> N <b>L</b> F <b>E</b> V <b>I</b> S <b>C</b> V <b>L</b> D <b>P</b> S <b>S</b> V <b>G</b> F <b>D</b> L <b>A</b> D <b>I</b> E <b>V</b> I <b>S</b> N <b>L</b> P <b>K</b> T <b>T</b> G <b>Q</b> L <b>L</b> M <b>F</b> M <b>T</b> Q <b>K</b> A <b>P</b>            | 1435        |
| LANCELET     | D--A <b>Y</b> K <b>V</b> V <b>P</b> D <b>A</b> V <b>W</b> K <b>S</b> P <b>L</b> Y <b>D</b> M <b>V</b> V <b>T</b> A <b>A</b> L <b>E</b> P <b>T</b> A <b>L</b> G <b>F</b> N <b>M</b> G <b>D</b> V <b>E</b> I <b>M</b> E <b>K</b> L <b>P</b> E <b>Q</b> T <b>K</b> Q <b>L</b> L <b>L</b> L <b>M</b> C <b>R</b> S <b>L</b> P          | 1439        |
| SEA_URCHIN   | E--A <b>L</b> E <b>V</b> I <b>P</b> S <b>K</b> L <b>W</b> T <b>G</b> L <b>F</b> A <b>E</b> I <b>L</b> C <b>G</b> C <b>V</b> L <b>K</b> P <b>A</b> S <b>L</b> G <b>F</b> N <b>M</b> A <b>D</b> T <b>V</b> I <b>M</b> N <b>A</b> L <b>P</b> Q <b>T</b> T <b>N</b> R <b>V</b> L <b>D</b> L <b>L</b> Y <b>T</b> K <b>L</b> P          | 1437        |
| STARFISH     | D--A <b>V</b> K <b>V</b> I <b>P</b> K <b>S</b> I <b>W</b> Q <b>D</b> S <b>L</b> F <b>D</b> L <b>V</b> V <b>T</b> C <b>I</b> L <b>Q</b> P <b>T</b> V <b>V</b> G <b>F</b> N <b>M</b> A <b>D</b> V <b>E</b> I <b>M</b> N <b>L</b> P <b>K</b> T <b>T</b> R <b>K</b> L <b>L</b> R <b>L</b> M <b>S</b> T <b>H</b> L <b>P</b>            | 1444        |

: : : :

M-HEAT/CIRCULAR CRADLE

Supplementary Figure 2: CLUSTAL OMEGA DNA-PKcs METAZOA VERTEBRATE INVERTEBRATE

|             |                                                                |      |
|-------------|----------------------------------------------------------------|------|
| TERMITE     | SSQLEELNSELGKAVSSMQTDVLSNLQ-DSLR---NDKVTLEQRQLLKGLEIHLKHC-GM   | 1426 |
| SHRIMP      | SEVIGEYSDYLEKQLQK-PENDI IKMLPLSL---ETAHINLRSRHVIEGIGILEKS-GW   | 1448 |
| SCORPION    | KPLYNNFNHEHLYEYL--ESKCNINLFLPLNLN---DKDLKILEIQEMLLGYEQLIEN-KL  | 1457 |
| ALVINELLA   | QNILVCFDLILKNMINSQGSADLFQLLPDKFD---ETKSEDLKLLQLVKGHEQLHLA-GL   | 1443 |
| CAPITELLA   | RNLAQELIESVSRHLMN-SSCDLSSKLP IPLL---EPNQDYIQLRLLVSGFEQLNSA-GL  | 1465 |
| SPONGE      | IDVKQNLIAYIASNINTGQTNVNLRLPVSYNST-TSSGILLFNRLVQGHYLAESNKC      | 1469 |
| OYSTER      | PDVLAAMCKEFGRL--QGDRDLSGLLSRPLD---DPSTDHVFLQQLVSGYQLHSV-GL     | 1460 |
| SNAIL       | LPERKELVKILEQEL--KGKGLDFGQIPISLT---SSSIDYTNLQQTVEGYCQLHDV-RI   | 1467 |
| TRICHOPLAX  | KDKRELMII TLKELLSRNRSYNLPDLLPIRFDRDNELNIDFERLTFLIKGYKQLLTM-GI  | 1457 |
| SEA_ANEMONE | LG-----F SRCNLF EKLP I PLAGE-DSRVDHLYLSHLVTGYKQLHAA-GL         | 1458 |
| PRIAPULA    | NAPKKELHSRVARSL---SEKKYNILPRLPCLMTDTGDDTRYLSSSLVCGYEQLYKA-EL   | 1478 |
| ESHARK      | -PFKETLVDSVRKRITAQSI EALCNVD---LYSPGARTDHAGLRSILSACQQLHKA-DL   | 1470 |
| STERLET     | -PYKQLEIISMKRRI SYKSVEELCGVD---LCNV DARS DRARLVFVLSACKQLHKA-GL | 1486 |
| COELACANTH  | -PYKDTLEASIRKRITARSIKELCSVD---LYNPDARLDHIRLGSILSACKQLYDA-GL    | 1474 |
| HUMAN       | -PYKDILETHLREKITAQSI EELCAVN---LYGPD AQVDRSRLAAVVSACKQLHRA-GL  | 1463 |
| CAECILIAN   | -PFKNDLEFSIKKRITSESIKDLCDVD---LYNQDARHYHARIGSILSACKQLHKA-GL    | 1476 |
| PLATYPUS    | -PYKDALEGNIKKRVT AQSI EELCTVD---LYKPDARFDRPRLASILSACKQLQRA-GL  | 1467 |
| CANARY      | -PYQESLKLCLKERITPQSLEDLCSVD---LFNSEARLDQVRFAGVLSACKQLQKS-GL    | 1465 |
| OSTRICH     | -PYKESLKLKLERITPQSLEDLCSVD---LFNSDARFDQVKYSAILSACKQLQKA-GL     | 1435 |
| TURTLE      | -PYKSELELSIKDRITQSIEELCSVE---LYNPDARFDHVRSSILSACRQLHKA-GL      | 1474 |
| ALLIGATOR   | -PYKSSLELSIKKRITSHSIEELCSVD---LYDPDARFDRVRISILSACKQLHKA-GV     | 1432 |
| SOFTCORAL   | KQFLIHLLTTLMSKISLGGRCNLFELLPPLSGEECDQMDHTRLQLLVRGYQLHRA-EI     | 1471 |
| STONYCORAL  | GECLERLKGTELEKIALGSHCNLFDQLPFPPLSNPQEHQVDCRLRAYLVQGYQLHCA-GL   | 1494 |
| ACORN_WORM  | GNVSSMEMKCKLQEKLPKPSMHLMNITPSILKGD-DKGINVVKLTHMVSQYEQHLHKA-NL  | 1493 |
| LANCELET    | SQQGALLKSQVAAKLSRRSSHDLFSLHPEVSAGV--AELDHVRLTLMVSGYQLHNA-GL    | 1496 |
| SEA_URCHIN  | TEQLKLETVIHKRITASRSEDLFSILPMLFSNESDLGLDHVQLHLVNGYKQLQKA-KL     | 1496 |
| STARFISH    | ANLRNNLSKAVTRSVTKSSHDLTKLLQSMFGRDEGLTTDHGKLIHLVKGYEQHLQA-NL    | 1503 |

M-HEAT/CIRCULAR CRADLE

|             |                                                                |      |
|-------------|----------------------------------------------------------------|------|
| TERMITE     | LSHIVKELPNQYG-LDGNQIVKH---LFSALVEGQGD-M-KRTVVLPAAFSYAESLLKFA   | 1481 |
| SHRIMP      | LAKCN-----VVSYSVAKELVDW---LC-GSIFKEQNLVSVSGISPHPSLLKFLYTMQLA   | 1499 |
| SCORPION    | W-----PKQNCNKS KKLACDMLSS---VWESCILETEIG-CCIPILNPSVLNFGKMLTVA  | 1509 |
| ALVINELLA   | LQSVLNK--SRQTESVSVQL-----                                      | 1461 |
| CAPITELLA   | LSNTLVS--KSS-EKLAEDLVNT---VFMGMVTAVDG-KPFLVNLSVPSVQSLAEKMLTTLA | 1518 |
| SPONGE      | LSDVLKSMGISEEESLAMRLYTNALTIIRGISSSPGDGT-PGYMPPHLKLTGELLKLG     | 1528 |
| OYSTER      | LSKVM--ATLPLD-LANKLLEY---VHSSLICVEGG-TKKSQTPSPTAQVTATRMLELS    | 1513 |
| SNAIL       | LLEVLG--KHGQPEKLAELLFDS---VLKGITEKKG-DKKTVSLSPAHRFASQLLKL      | 1521 |
| TRICHOPLAX  | LKTTPADHK----DLIEKIMKS---V--VDCFRGEMNGDRALTALSPAQQKVAEELDLA    | 1507 |
| SEA_ANEMONE | LMDVMLTRGSTKPLEYGSRLNA---VYEGACRAAVRTSGSIIVLSPASHQLACKLLELA    | 1515 |
| PRIAPULA    | LLPALQEAAPAL---PASLLTS---VFEGCTLSRPGVSSLTGMSPSVRELGGRLRLA      | 1531 |
| ESHARK      | LNSAIDCEAGLSLSSLSLKL LSV---VYKGIAPGDERK--SLPSIDVSSKQLADGLLQLS  | 1525 |
| STERLET     | LNSALQSQAAAFGLSLGSKLLSV---VYKGIAPGDERK--SLPSMDVSSRKLADGLLQLA   | 1541 |
| COELACANTH  | LNSAVQYQSGDFNLQLGSTLLSV---VYKGIAPGDERK--SLPSIDISSKRLADGLLQLA   | 1529 |
| HUMAN       | LHNILPSQSTDLHHSVGTLELSL---VYKGIAPGDERQ--CLPSLDLSCQLASGLLELA    | 1518 |
| CAECILIAN   | LNSVLQSQTAGLQFTVGSKLLSV---VYKGIAPGDERK--SLPSLDISSKRLADGLLQLA   | 1531 |
| PLATYPUS    | LHAAVHPQASHLQRPGSTKLLSV---VYKGIAPGDERQ--SLPSLEISSKQLASGLLELA   | 1522 |
| CANARY      | LHSVLHGQDEGSHFVSGKLLSV---VYKGIAPGGERM--SLPCLDLSRKRRLADSLQLA    | 1520 |
| OSTRICH     | LHSVLHNQDEVPHFSLGCKLLSV---IYKGIAPGAERL--CLPSLDISSKRLADGLLQLA   | 1490 |
| TURTLE      | LHSTLQSQGSLHFTVGSKLLSV---VYKSIAPGDERK--SLPSLDISSKRLADGLLQLA    | 1529 |
| ALLIGATOR   | LHSVLQSQGSLHFTVGSQLLSV---VYKGIAPGDERK--CLPSLDISSKRLADGLLQLA    | 1487 |
| SOFTCORAL   | LLPALAKEGEWSAEKCEELLS---VFQGFIVQSD-VFRIVNLTASRELAKLLDLA        | 1527 |
| STONYCORAL  | LLPALKAQARNASEEYAVKLF TA---VYDGVKPSLVNGLQTVILDPASQHLASKLLDLA   | 1550 |
| ACORN_WORM  | LLPALQKTGMASGDKFSQQLLTA---VFESISTKQSN-SLIVSHLSPTAHELAVRLDLA    | 1549 |
| LANCELET    | LLPA---LGTNSGKSLASELVSA---VFKSMVTRKD-GHPTAASLPPSFHQLTGGLLQLA   | 1549 |
| SEA_URCHIN  | LTRQT--TNQALS-----ILDF---VMRGLVVRGENGQ-EARKMTPSEIDLQRLLELA     | 1544 |
| STARFISH    | LSAAT--TGHGSGSSFAVKLFIT---VFDLSLTSDEAGKLLQANLTPLSVELAESLLDLA   | 1558 |

M-HEAT/CIRCULAR CRADLE

Supplementary Figure 2: CLUSTAL OMEGA DNA-PKcs METAZOA VERTEBRATE INVERTEBRATE

|              |                                                                   |             |
|--------------|-------------------------------------------------------------------|-------------|
| TERMITE      | FLLNKEVTTV-ICCIKEQASIQNPATN-----SSVLHGDIYFFVTFRSAILEHMLACFE       | 1533        |
| SHRIMP       | ITLDPKVKHLLSWATNSDTSVSGTSGQ-----EVEKGSVHLSILGPKLIPQFLESPP         | 1551        |
| SCORPION     | LKLDISSEDL-LKKLLDEQQLYVSNLK-----TKTRRGLIMFSTYQQEISLFAGINSK        | 1561        |
| ALVINELLA    | FDVVFKNEDL-ISRLLDKSPVKNM-AV-----HSSSDHGMFYACFKSTVNQHLVANCA        | 1513        |
| CAPITELLA    | FQMGYPEKNL-VELIFNSNNIHGVSTN-----VQCSPHGTLYFAAFKSVVNLNFKSVE        | 1571        |
| SPONGE       | LLESDSVEPF-LLLVLSPAQSG-----AGASFAAQDGLLLYITYSGLINNKLKLLHIK        | 1579        |
| OYSTER       | FCLGVQIKKV-VMCILDDESMVEGTAKG-----YSQSHGELMFTAFKTTVSVHLAKAMA       | 1565        |
| SNAIL        | FQLGLPAEKL-VEGILDIRIQGLSLG-----IEYMLGDHFFTLFKTPISSHVAASS-         | 1572        |
| TRICHOPLAX   | FELNETIDIF-FRYLLDETK--LY-----GDSNSATATLGMTLYYTFNSNINAFKLVSN       | 1559        |
| SEA_ANEMONE  | FDLGIEVITI-FRRAVNILLIQMI----CFLFDGSSVGVAFYITTFQASINTYLIKNAQ       | 1569        |
| PRIAPULA     | FTMKVESDSL-LSLLFDDTRLLGVSAK-----QTTKGSMPFYSTFGHEINNHVGMAT         | 1582        |
| ESHARK       | FSLGGQCEEL-VSLLLNTMELSVPLSG-ATQKNFITFSSHGEYFYSLFSETINAELLKSLK     | 1583        |
| STERLET      | FSLGGQCKEL-VDLLNNSIMLSVPLSD-TSQKNFITFSSHGEYFYSLFQETINSELLKND      | 1599        |
| COELACANTH   | FSFGLQSGEL-VCLLLNRVTLVPLSG-TSQKNFITFFHGEYFYSLFMETINSELLRNLS       | 1587        |
| <b>HUMAN</b> | <b>FAFGGLCERL-VSLLLNPAVLSTASLG-SSQSVIHFSHGEYFYSLFSETINTELLKND</b> | <b>1576</b> |
| CAECILIAN    | FDLGGQCEEL-VSLLLNTVKLSVPLSG-TSQRNISFSSHGEYFYSLFSETINTELLKND       | 1589        |
| PLATYPUS     | FAFGGICEEL-VSLLLNTVVLVPLAG-TSQRNLSFSSHGEYFYSLFSETINTELLKND        | 1580        |
| CANARY       | FALDICEEL-VSLLLNTVVLVPLSE-ASQNLNMFSSHGEYFYSLFSETINQQLKND          | 1578        |
| OSTRICH      | FAIDGQCEEL-VSLLLNTVTLVPLLG-ASRKNLVNFSHGEYFYSLFSETINEQLKND         | 1548        |
| TURTLE       | FAFGGQCEEL-VSLLLNTMMLSVPLSG-TSQRSLSFSSHGEYFYSLFSETINQELKND        | 1587        |
| ALLIGATOR    | FAFGCQSEEL-VSLMLNTAMLSVPLSE-AAPRNLLSFCHGEYFYSLFSETINHELLKND       | 1545        |
| SOFTCORAL    | FDLGLKIESV-LHCILNKSCCLADAKGS-----SSTVGMVYQTFHNTIEHLLKNSS          | 1578        |
| STONYCORAL   | YDLGLQFNYL-MESIMEDSND-----NPGSSCGCTFYRIFQTSINGFFIERAN             | 1597        |
| ACORN_WORM   | FLLASQSKEL-VSCLMKNKTPVKTGRVD-----SSAGYCGLSFYSHFKVPINTQLAQHGQ      | 1602        |
| LANCELET     | CQLHPQGHDL-LDCVMNKTPLMTGGGK-----KSSTFQGMVFFSTFKSCICQQLIKTCA       | 1602        |
| SEA_URCHIN   | FQLGVQTSNL-IDCLETPVVSSTRSLTSKLSASQTSGLVFLFTYKQPIMDQLVKHQA         | 1603        |
| STARFISH     | FLGLIEAKML-VSCLLDKALFSGRS-----STSKGAVFYTFKTKLNGEMAVQAQ            | 1608        |

M-HEAT/CIRCULAR CRADLE

|              |                                                                  |             |
|--------------|------------------------------------------------------------------|-------------|
| TERMITE      | HSVSCLIKDISANNVQWVISTVTEILQYYAKIRKSKHQ--DSTTLCAFERSIVNHNKLS      | 1591        |
| SHRIMP       | DALSRCEMIREGRFLPAMGFASALITCLIRNADIRK----KYSVKVVQSFLKHPTLA        | 1606        |
| SCORPION     | HFISSLMNNINKSKTT-VLKILVGLDLSIGKVEFRY----RYGKDIINSIMCQWSRLQ       | 1615        |
| ALVINELLA    | EFLDHLLKWAHDETTT-VGCILISMLEYIRQDRQLRK----NLGSSVIKALLDRFRLH       | 1567        |
| CAPITELLA    | KFVPLLMRHLAANGET-LSSVLIGIAESVISDRPLRK----SHGKMVSRAIVSQWSSLS      | 1625        |
| SPONGE       | MAIDVLLKNAKTHPQQ-VSVILNLLLEYVQKDFKINNNNNKNETVETLCTELISHWQDLS     | 1638        |
| OYSTER       | QAVPVLCEHAQKQCYR-VMSILVTMVDTVSKDKNLRK----QISANVVTSVVEKWKSSIS     | 1619        |
| SNAIL        | DVVSLLMNKATVDPHR-VCNVLVAMLENVAQDRRIK----SNGPRIIVDMVASKWHHLE      | 1626        |
| TRICHOPLAX   | RCLPMLDLAASKSFM-ISGILSGLLDFILDRDGLRQ----SKGIHISKILSSWNSLK        | 1613        |
| SEA_ANEMONE  | SHIPQLVSMATSYSSH-VCSILNSILDQFNDRKTSRK----RYGSSVVCASIVNSWEVFS     | 1623        |
| PRIAPULA     | VLIIPKVLDRINRESV-VMTILTDLDDQVGKDRERK----RYGSGVVNTVLQCVGHLR       | 1636        |
| ESHARK       | SAVTQLMRSAAENPKM-VSTVLNGMLDQSFDRDTRK----TQGVLLVSAVLTNWRLE        | 1637        |
| STERLET      | TTVAQLMKSAENPKM-VSMVLNGMLDQSFDRERSVRK----TQGSQLVGGVLSWTSLQ       | 1653        |
| COELACANTH   | TAVSQLMNSAAENPKM-VGAILNGLDQSFRRNTRK----QQGSQLVDTVLQNWTKLS        | 1641        |
| <b>HUMAN</b> | <b>LAVLELMQSSVDNTKM-VSAVLNGMLDQSFRRANQK----HQGLKLATLILQHKKCD</b> | <b>1630</b> |
| CAECILIAN    | TAILQLMKSSVDNPRM-VGTILNGMLDQCFDRDTRK----QQGVKMVIQVAVLQNWKKLD     | 1643        |
| PLATYPUS     | TAVLELMKSSVDNAKM-VGTILNGMLDQSFDRDTRK----QQGEKLVDAIILQNWKRLD      | 1634        |
| CANARY       | VFIVRLMKSSISNPQM-VGSILNGMLDQSFDRDRAVRK----QQGAKLVTAVLRNWEKLD     | 1632        |
| OSTRICH      | VIIQLMMESSVSNPQM-VGSILNGMLDQSFRETRIRK----QQGVKLVTAVLRNWKRLD      | 1602        |
| TURTLE       | VAIQLMKSVDSPKM-VGTILNGMLDQSFRRERAVRK----QQGKLVTAVLRNWRMLD        | 1641        |
| ALLIGATOR    | VAIQLMKSAVDNPRM-VGTILNGMLDQSFRETRVRK----QQGMKLVTAVLRNWRMLD       | 1599        |
| SOFTCORAL    | EHLPKILEYNRDEAQW-VSSTVIALLDMSVMDKELRK----MNGRKMFTVLLSWERLS       | 1632        |
| STONYCORAL   | IHMANILMKAASSPFL-VLSLLNGLDQVIRDKILRT----RNGSSFVAVLLNNWTSFE       | 1651        |
| ACORN_WORM   | EVVPLLLRHVVADSTI-VSTILNGLDHIITNNRELK----KKGLTVHAAIILSNWSSLK      | 1656        |
| LANCELET     | ESLPVLLQQLTAEPVW-VGSILHGLDHLAKDKTLRK----KEGAALCDSILLQSWPKLA      | 1656        |
| SEA_URCHIN   | DTVYELSNRVREDRGT-IGMIYGLLEHAVGNREIRK----RYGMAIYSAVLTQWDTLS       | 1657        |
| STARFISH     | KVIPLLVREGGKDVTV-VSSVLNGLLDYLTSSREVRK----THGMSVHSAILTQWDILM      | 1662        |

M-HEAT/CIRCULAR CRADLE

Supplementary Figure 2: CLUSTAL OMEGA DNA-PKcs METAZOA VERTEBRATE INVERTEBRATE

|              |                                                                    |             |
|--------------|--------------------------------------------------------------------|-------------|
| TERMITE      | SFVEGNS---EQVYQLLGLVNVNLARIMPPQDRGLA---RCEALQKVVITQLTSRDLQLHY      | 1645        |
| SHRIMP       | AQAGKTS---LHQDSVLSLLSSFLIDREGTIKSHCTSSRSDMVVFNGLLADAKVELQA         | 1663        |
| SCORPION     | QCLEESC-DIDLQNDIITLITKMFLLIDSSFLKGNVN-YDSNSIFFFFITLLQKSEMSLEF      | 1673        |
| ALVINELLA    | AWWHGESATKETQSMALNILLTKMILIDSKAVCNVQQ-KGFSHMFDMYLNMVLVKRSLSF       | 1626        |
| CAPITELLA    | VVWSESTASLDTKMVAITLLTKMLQIDSTVLIIDVKN-KSFYVVFKMFLGLISDKNNTLQF      | 1684        |
| SPONGE       | LWWEDGS-K-DLKSAAVTLLOKIIALKPKLLLSKAD--VSKPLVDMYTAMIGDEKLELNF       | 1694        |
| OYSTER       | SWCLA-T-P-ELHSMAMLLTKLVLLDSKVVDSSS-GHFPEVFETYLSMLTEKKTLSV          | 1675        |
| SNAIL        | SWWQAGS-S-DLQGLAVLTLTKLLLVDKAVLNVEK-SHFTTVFVTSYCTILAEKKTNLAF       | 1683        |
| TRICHOPLAX   | CWWLTPD-AQDLLQISVNLNKCLTLDPQFATQSN-D-SFETVFNFFLSLLSGTSTSLAF        | 1671        |
| SEA_ANEMONE  | SLWDMSS-SSELKQALLEIMKLLLLSDPKCLIDPAK-PAFQIVLKMFTSVFDDKNLTLTF       | 1681        |
| PRIAPULA     | DLWVATS-TPDRKDMLLMLLRKLLLIDSSVATKGS-SAHRDVYDTCCLLVDAGTSLAF         | 1694        |
| ESHARK       | SWWSENS-SAESKMAVLTLLSKVLQIDSSVSFSSNH-EAFAMVFHTYTTIITDSTLALNL       | 1695        |
| STERLET      | SWWASS-SAESKMAALTLLSKVLQIDSSVSFNTH-LAFVAVFSTYTTITDSTLPLNL          | 1711        |
| COELACANTH   | SWWIRSS-SPELKMAALTLLSKVLQIDSSVSFNPNH-AAPPAVFNTYTTITDQTLALNL        | 1699        |
| <b>HUMAN</b> | <b>SWWAKDS-PLETKMAVLALLAKILQIDSSVSFNTH-GSPPEVFTTYISLLADTKLDLHL</b> | <b>1688</b> |
| CAECILIAN    | SWWDKNS-APESKMAVLTLLAKVLQIDSSVSNAHH-EAFSAVFNTYTSILTDQKGLNL         | 1701        |
| PLATYPUS     | TWWAEDS-TPESKIAVLTLLAKVLQIDSSVSNTNH-AAFSAVFNAYSLLIDKKLGNL          | 1692        |
| CANARY       | GWWAKGS-SAESKMALTLAKVLQIDSSVSFNTH-EAFTA VFNTYTSLLTDQNLGNL          | 1690        |
| OSTRICH      | SWWAKGS-APESKMAVLTLLAKVLQIDSAVSFNTH-EAFTA VFSTYTSLLIDQNLGNL        | 1660        |
| TURTLE       | SWWAKDS-APESKMAVLTLLAKVLQIDSSVSFNTH-EAFSAVFNTYTSLLIDRNLGNL         | 1699        |
| ALLIGATOR    | TWWAKDS-APESKMAVLTLLAKVLQVDSVSFNTH-EAFFAVFNTYTSLLVDQNLGNL          | 1657        |
| SOFTCORAL    | HWWENG-EEL-KRSTAILIRNIIIVDPKCLSEVK---SSRGMFKTYNGLKDKTITLTV         | 1687        |
| STONYCORAL   | IFWRTHS-AMDLRHSILMILKMLILDPKAVTDCNR-LTFPPLFEMYLKDKSTTLAF           | 1709        |
| ACORN_WORM   | SWWSEGA-THDQRSSTLILLKLLQIDSKFASDPH-AAFPKVFDMYLMVTDSTSLAF           | 1714        |
| LANCELET     | PWEEGA-LQDSKSTALTLRKILIDSVSRDPAH-PAFQPVFMYLDMTDSRSTLPP             | 1714        |
| SEA_URCHIN   | NL-----GQEDDFMLNLMKVKVLQIDFKFATDPTH-PTFRPVFNQYLSMLRDSKSLAW         | 1709        |
| STARFISH     | GGLKKG-STDLQSFALLMLRKLQIDAKFVSDTTH-PVFSVLEAYSFMLTDASTLTF           | 1720        |

**M-HEAT/CIRCULAR CRADLE**

|              |                                                                                                                                                                                                           |             |
|--------------|-----------------------------------------------------------------------------------------------------------------------------------------------------------------------------------------------------------|-------------|
| TERMITE      | KSRA <del>LDLL</del> VLVCLAG--PQEDTNQELRSALQTLREQHFPQLS <del>TEL</del> HS <del>GS</del> VGYSGFVN <del>AF</del> RKI                                                                                        | 1703        |
| SHRIMP       | KIKVL <del>KLL</del> PPFFT---MGEDIAKSVSEALEM <del>LSL</del> NH <del>FPL</del> H <del>S</del> TEFSEGGARDREYHQAICEI                                                                                         | 1721        |
| SCORPION     | KICV <del>LDLL</del> PPFLC---DAPLCKVQAA <del>LN</del> DLFTNH <del>FPLY</del> SSELKPGSSQYNDYHLAFTKL                                                                                                        | 1729        |
| ALVINELLA    | KS <del>NVLD</del> ILAF <del>FC</del> S--LPEDYI <del>WQL</del> KE <del>LER</del> FVDN <del>FQK</del> S <del>DQY</del> RK <del>SP</del> KYNE <del>YI</del> ISFNKI                                          | 1684        |
| CAPITELLA    | K <del>TRVLD</del> LLI <del>FF</del> FCN--LPAAENKQLESCL <del>NQ</del> FVAD <del>CFPM</del> SLEFHAGSQQKCYIT <del>AL</del> DRL                                                                              | 1742        |
| SPONGE       | KAVMI <del>DLL</del> PS <del>FL</del> LLSSP-EHQSQLKGS <del>LN</del> R <del>LV</del> S <del>LQ</del> F <del>PLT</del> SSEL <del>PAG</del> GPLLE <del>NY</del> TNIEKL                                       | 1753        |
| OYSTER       | CK <del>KILE</del> LLPPFAT--LPEPHL <del>KL</del> KRS <del>LD</del> R <del>LV</del> ADH <del>FP</del> IK <del>ST</del> DL <del>PE</del> SSPH <del>F</del> KDYIAA <del>DR</del> L                           | 1733        |
| SNAIL        | KN <del>RALD</del> VLP <del>PF</del> FAA--VPDAKL---KDV <del>LD</del> GLVADN <del>FPL</del> R <del>S</del> SELTKGTP <del>RF</del> V <del>Y</del> ISAIDKL                                                   | 1738        |
| TRICHOPLAX   | KKYV <del>LD</del> LLH <del>FF</del> LV--SSDKRIRE <del>RE</del> H <del>LD</del> RMIV <del>DK</del> F <del>PL</del> KS <del>AE</del> FV <del>VG</del> SPDYNDYVACIDKL                                       | 1729        |
| SEA_ANEMONE  | KSRA <del>VEL</del> LP <del>Y</del> FKN--LPDNYQSQLKSCID <del>TL</del> V <del>T</del> DN <del>FPL</del> KS <del>TE</del> FIPGSPRYNDYIAT <del>LD</del> KL                                                   | 1739        |
| PRIAPULA     | K <del>TRV</del> MEL <del>L</del> H <del>F</del> YCE--LPEQET <del>T</del> K <del>RE</del> N <del>LD</del> RMVAD <del>F</del> <del>FPL</del> R <del>S</del> SDFIVGSPKYHDYVAAMS <del>QL</del>               | 1752        |
| ESHARK       | KSQAMI <del>IL</del> PPFAH--LPEENLAVLRHALD <del>Q</del> VAAH <del>FPM</del> K <del>S</del> DEF <del>FP</del> K <del>GT</del> LKYNNYVDAIK <del>KL</del>                                                    | 1753        |
| STERLET      | KSQALI <del>IL</del> PPFTN--LLGSTLADLHNA <del>LE</del> V <del>LV</del> ASH <del>FPM</del> Q <del>S</del> DEF <del>FP</del> K <del>GT</del> LRYNNYIDS <del>IK</del> KF                                     | 1769        |
| COELACANTH   | KSQAVI <del>VL</del> PPFTN--LPEDHLADLKNALD <del>Q</del> LVA <del>FN</del> <del>FPM</del> K <del>S</del> DEF <del>FP</del> K <del>GT</del> LKYNNYVDCI <del>KKF</del>                                       | 1757        |
| <b>HUMAN</b> | <b>KGQAV<del>TLL</del>PPFTS--LTGGSLEELRRVLEQLIVAH<del>FPM</del>Q<del>S</del>REFPPGTP<del>RF</del>N<del>NY</del>VDCMK<del>KF</del></b>                                                                     | <b>1746</b> |
| CAECILIAN    | KSQAI <del>IL</del> PPFTN--LTGDSLNDLKNALD <del>Q</del> LVA <del>FN</del> <del>FPL</del> K <del>S</del> DEF <del>FP</del> K <del>GT</del> LKYNNYVDCV <del>KKF</del>                                        | 1759        |
| PLATYPUS     | KSQAVI <del>IL</del> PPFTN--LTGDR <del>LN</del> DLKNAL <del>EQ</del> VAF <del>FN</del> <del>FPM</del> N <del>S</del> DEF <del>FP</del> K <del>GT</del> LRYNNYVDC <del>T</del> KKF                         | 1750        |
| CANARY       | KGQAVI <del>IL</del> PPFTN--LTG <del>E</del> KLNDLKNALD <del>Q</del> LVA <del>FN</del> <del>FPM</del> R <del>S</del> DEF <del>FP</del> K <del>GT</del> LKHNNYVDC <del>T</del> KKF                         | 1748        |
| OSTRICH      | KSQAMI <del>IL</del> PPFTN--LTG <del>E</del> KLNDLKNALD <del>Q</del> LIA <del>FN</del> <del>FPM</del> R <del>S</del> DEF <del>FP</del> K <del>GT</del> LKHNNYVDC <del>T</del> KKF                         | 1718        |
| TURTLE       | KSQAVI <del>IL</del> PPFTN--LTGDR <del>I</del> SELKNALD <del>Q</del> LVA <del>FN</del> <del>FPM</del> K <del>S</del> DEF <del>FP</del> K <del>GT</del> LRYNNYVDC <del>T</del> KKF                         | 1757        |
| ALLIGATOR    | KSQAVI <del>VL</del> PPFTN--LTGERL <del>KEL</del> KDALD <del>Q</del> LVA <del>FN</del> <del>FPM</del> K <del>S</del> DEF <del>FP</del> K <del>GT</del> LRYNNYVDC <del>T</del> KKF                         | 1715        |
| SOFTCORAL    | KIQCLE <del>LL</del> PC <del>F</del> TSATIPSE <del>Q</del> TEALRSAL <del>KT</del> L <del>I</del> ADN <del>FPL</del> S <del>S</del> KEFNEN <del>N</del> PKYSDYIAAL <del>DK</del> I                         | 1747        |
| STONYCORAL   | KGQVLE <del>LL</del> PY <del>F</del> TK--STEEYL <del>R</del> RLKEGL <del>NA</del> FVTNNI <del>PL</del> K <del>S</del> TEFV <del>T</del> GGPQYNDYVQ <del>T</del> DKL                                       | 1767        |
| ACORN_WORM   | KS <del>R</del> VLE <del>IL</del> Y <del>F</del> FTR--IPEQEL <del>S</del> LLQGR <del>LN</del> RLIADN <del>FPL</del> K <del>S</del> SEFV <del>V</del> GGSPKYNDYVAA <del>F</del> GKI                        | 1772        |
| LANCELET     | KSQV <del>LD</del> LLPPFTV--LPQTQ <del>L</del> AELKAR <del>LD</del> RMVADN <del>FPL</del> K <del>S</del> AE <del>F</del> PAGSSKYNDYVGA <del>V</del> TKL                                                   | 1772        |
| SEA_URCHIN   | K <del>TQ</del> V <del>LD</del> VLY <del>F</del> FAN--VPEKE <del>E</del> KELK <del>S</del> ALD <del>LV</del> ANH <del>FPL</del> K <del>S</del> T <del>D</del> LEAGSPRYNDYI <del>M</del> ALN <del>KI</del> | 1767        |
| STARFISH     | KAQVMD <del>VL</del> FFFTS--LPDGE <del>Q</del> T <del>K</del> LR <del>S</del> ALD <del>R</del> LVADN <del>FPL</del> N <del>S</del> SE <del>F</del> RVGSPKYIDYAGAL <del>N</del> KI                         | 1778        |

**M-HEAT/CIRCULAR CRADLE**

Supplementary Figure 2: CLUSTAL OMEGA DNA-PKcs METAZOA VERTEBRATE INVERTEBRATE

|              |                                                                      |             |
|--------------|----------------------------------------------------------------------|-------------|
| TERMITE      | LRGLEESGSCVILLSVVAMAASES-QHVLEDDQIQKSLQIFIKRLEDK--QQVKAIEAVFK        | 1760        |
| SHRIMP       | LTALELSLSPILLQFVNVNLFPCRED-KHRYEEVMHESLEKFMKKLP--KQOETLKHIIYD        | 1778        |
| SCORPION     | LIALELTGNEMLLKFFVIQIMCREP-THLLEENIQKCLKCKKRTDSN--KERLIAEVPLK         | 1786        |
| ALVINELLA    | LSALELSGNLMLELLISIIICKEE-AHAEHEHIQKTLTKMAKRLPVD--KQKPAIEVPYR         | 1741        |
| CAPITELLA    | LLAMELSGSLMLLNLIISVICKEV-KHTHENAIQSAFQRFIKRRLPKD--KHKLALDVPYK        | 1799        |
| SPONGE       | CNSLVASGSLVLELIIINIMCREV-RHVCEEKIQTSLHQFISKLSED---GVDALKFVYE         | 1809        |
| OYSTER       | LTSLELSGSEMELLELLISIFCREP-KHVYETKILESINRFRTRVPAA--KQKSMVDVAYN        | 1790        |
| SNAIL        | LSALELSSSLVLELLELISIFCREEGRHVHEDAIQQSLNFTARLPAE--KQKDALDVPYK         | 1796        |
| TRICHOPLAX   | LANLIKSGNLMLELVISVMCREK-KHAYEEQIQKSLLLFISSLI PKDA--LGALDVPFK         | 1786        |
| SEA_ANEMONE  | LVTMVTSGSLVLLQVITAVLCREE-RHVHEEIQKSLAAFQRLAPSSSLVKGAVDVTYR           | 1798        |
| PRIAPULA     | LDVMEVSGSTMLLRLVISIVCREP-KHAMHDQLQTSLSRFIHRLSAD--KQKLAADSGYS         | 1809        |
| ESHARK       | LDALELSQSPMLLKLMIAILCRDS-RHVMEEGFQVCFQRLAKTGSCE--KQVALLEAVYG         | 1810        |
| STERLET      | LDALELSQSPMLLKLMTGILCRDN-KHVMEELFQTCFKRIARRGSC--KQVSLDVTYQ           | 1826        |
| COELACANTH   | LDALELSQSPMLLRLMTEILCRDS-KHCELELFLRCFKKI VRRGSCD--RQVTLDDTVYK        | 1814        |
| <b>HUMAN</b> | <b>LDALELSQSPMLLELMTTEVLCREE-QHVMEELFQSSFRRIARRGSCV--TQVGLLESVYE</b> | <b>1803</b> |
| CAECILIAN    | LDALELSQSTMLLKLMTTEILCRDT-KHFMEELFLTSFKRIARRGNC--KQVALLETVHD         | 1816        |
| PLATYPUS     | LDALELSQSPMLLQMLTEILCRDQ-RHFMEELFQMSFKRIARRGSA--KQVALLEAVHG          | 1807        |
| CANARY       | LDALELSQSPMLLQMLTEILCRDN-RHFMEELFQASFKRIARRSPD--KQVLLDVTYK           | 1805        |
| OSTRICH      | LDALELSQSPMLLQMLTEVLCRDH-RHFMEELFQASFKRIARRSNSD--RQVLLDVTYK          | 1775        |
| TURTLE       | LDALELSQSPMLLQMLTEILCRDH-RHFMEELFQTSFKRIARRSSYE--KQVLLDVTYK          | 1814        |
| ALLIGATOR    | LDALELSQSPMLLQMLTEILCRDH-RHCEMELFQTSFKRVIKRSDCN--KQVLLDVTYK          | 1772        |
| SOFTCORAL    | LSALVLSGSLMLFDLLISIVCREE-SHSHHEEIQIQAFAKFIKRLKQ--QARKALDICFD         | 1804        |
| STONYCORAL   | LAAFVNSRSLILLEVLI AIFCREP-QHVHEDQIQSFI AFIQRLHPEPDQAKAAMDVCLS        | 1826        |
| ACORN_WORM   | LSALVLSGSLMLELLISIMCREP-KHVCEDDQIQASLITFIKHLPAD--KQKPAVDVAFD         | 1829        |
| LANCELET     | LSALELSSSLMLELLISVMCREA-KHVMEEDDQIQTSLSRFIKGMGAD--RQKPAIDIPYG        | 1829        |
| SEA_URCHIN   | LTSLVMGSLMLELLISILCRDD-KHSYEDKIQQALSSFAKRLPSE--KQSAANIPFE            | 1824        |
| STARFISH     | LTAMVLSGNLMLELIVISIMCRDE-KHAYEDEIQESLAAFIKRLPEE--KQTAAGVAVYQ         | 1835        |
|              | : : . : : : : * . : : .                                              |             |

M-HEAT/CIRCULAR CRADLE

|              |                                                                     |             |
|--------------|---------------------------------------------------------------------|-------------|
| TERMITE      | VFVD--DQYDPSVRLGCAQRVFRPLLQGCRRSAAREFYRHCIQDLQGMNVTLDCRGQLQ         | 1818        |
| SHRIMP       | MYND-PTCIKQNLRYNIMDLVLTPLLQQAQAEVPTQNFLLTVISAVMAGMSAPVHGRSDE        | 1836        |
| SCORPION     | MFLE-DELYPSDMRIHIEKVFVRVILGMISKITLKYFFIDHIKEIMQIVKSKRKS----S        | 1841        |
| ALVINELLA    | IFCN-ESTFKNARRAALERVCVTL LRAVSVPALKEFFYDHIKDIMFSIELQFSQL--SV        | 1798        |
| CAPITELLA    | IFSQ-EGRFNTNQRRAACEKVSLSL MRLVHSSALTEFYCEHIKEIMKIIIEAKPTKAPHA       | 1858        |
| SPONGE       | MFKN-DKDFPVAAVKIGIGERLCVPLFTECCSAVLEFFVVLKISDVCMIMEAKLARVTDPK       | 1868        |
| OYSTER       | IFCQ-EKLYPGEVRRRTIEKVALPILRLVHKSALLEFFTDHMGDLRTTVEAKLVKGS--G        | 1847        |
| SNAIL        | IVFC-ESGFQDMIRRTTLERVCLPILRCVHKAALIEFFLDHILDLMRIVEQNLAGGPESI        | 1855        |
| TRICHOPLAX   | MFVD-DKSYRPDIRRAAIEVRCLPMLQKASLKITKDFYVSHIKEIMDIIETKLVKTA--D        | 1843        |
| SEA_ANEMONE  | IFTN-ERDHTSNVRLAVLDRVSVTL LCNASKAGVSEFFSSHVKEIMEIEAKQLKTYDPG        | 1857        |
| PRIAPULA     | ILAE-EGNFPGEIIRRSCLDNVLLLLRQCCHHAVVEFFRCHLVEIIGIEAKVVKLPERQ         | 1868        |
| ESHARK       | MFEN-EGGLSNARQSVMDRSLTLITHCSLDALKEFISKIKDAMGILQSRFTKTSSESS          | 1869        |
| STERLET      | MFQN-DELHSNTARQAVLDRSLLTL TLHCSLDALKEFFCTTVGDIMGTQARFTKSSEST        | 1885        |
| COELACANTH   | MFQD-EGLLSNTTRQAIMDRFTLIMLNCSIDALKEFLCKNILDVMGTQARFTKSNESA          | 1873        |
| <b>HUMAN</b> | <b>MFRK-DDPRLSFTTRQSFVDRSLLTL LWHCSLDALREFFSTIVVDAIDVLSRFTKLNES</b> | <b>1862</b> |
| CAECILIAN    | MFKT-ENLWSNTRQITVDSLLIL IWHCSLDALKEFFCKI IHTMDTLKGRFTKSNELA         | 1875        |
| PLATYPUS     | MFLR-DDHLSSTTRQAFVDRSLLTL LHLCSLDALKEFFYRIIVGAMDMLKSRFTKSNES        | 1866        |
| CANARY       | MFQS-EELLSNAARQAFVDRSLLTL LWHCSLDALREFFGKIIVEAMDTLNSRFTKSHEHT       | 1864        |
| OSTRICH      | MFQS-EDLRSNVTRQAFVDRSLLTL LHLCSLDALREFFGTIIVQAMDTLNSRFTKSNES        | 1834        |
| TURTLE       | MFQS-EALLSNATRQAFVDRSLLTL LHLCSLDALKEFFFSKIIVLEAMDTLKRFTKSNESA      | 1873        |
| ALLIGATOR    | MFQS-ESLLSNVTRQAFVDRSLLTL LLYCSLDALKEFFFSKIIVLEAMDTLKRFTKSNETV      | 1831        |
| SOFTCORAL    | VFTKKDTEYRNLTRRAAIDKVLVLLRASSTVFREFFYVDHIKNIIMEIIETRFSKATDSV        | 1864        |
| STONYCORAL   | IFFN-ERDYQTHSRRAVIERICITFLKSTTARRAFYQDQIQKLSVLEAKELKPTDPN           | 1885        |
| ACORN_WORM   | VFHK-ENVYPNDIRRAALERVGLPLRLVDIPTLSTFFISHVNQIMNTIEAKQIKVPES          | 1888        |
| LANCELET     | IFRR-EGSPNEIRRSALERVCLPMLRLVHPAALTEFFTDHIREIMDIIGAPQTKAGEAS         | 1888        |
| SEA_URCHIN   | IFKQ-DKRYSKAIRKAAIQVCIPLRLQASRDATVTFYKGHIHDIISVLEARLTKNPVPA         | 1883        |
| STARFISH     | IFCQ-ENSFSKEIRRAAIEVRVCIPLMRLAGVKALSSFFKECIKNIGGIIDAKTIKAPETV       | 1894        |
|              | : : : : * : :                                                       |             |

NUC194



Supplementary Figure 2: CLUSTAL OMEGA DNA-PKcs METAZOA VERTEBRATE INVERTEBRATE

|              |                                                                  |             |
|--------------|------------------------------------------------------------------|-------------|
| TERMITE      | TEHQLVGRIGAWNILEPLFVHLESSELESKECVITAAAFPGA---VKTGKEL-ISDLTSR     | 1874        |
| SHRIMP       | QHKTLVTKVGSFMILQIMYSKLPREKLFAPGSEINAAFRPGD----QSGKEL-TKEIFRY     | 1891        |
| SCORPION     | NEIQLVSKIGAFQLIEILYTLKSKEEVS-KESQINCSY-----GKEL-TREATGF          | 1889        |
| ALVINELLA    | SESQMVTKLCNFELLEVMYSRLTREEVRSKNSTINQKYCYPK--TDVEGKEL-TAAITKA     | 1855        |
| CAPITELLA    | FEAQLTSKIGCFELLEVMYSRLPNTDVNSKSSINKSFCSPK--IPDTGKEM-NLTITKV      | 1915        |
| SPONGE       | LECQLVHKSCCFQFIEILYTRLPSSLISSMESTVNTAYCNGS---PQTGKEL-TQAITKC     | 1924        |
| OYSTER       | LENQLTSKLCFCQLEELMYGRLSKEEVFGKSSVINKKFCEVKSVMVDTGKEM-TQVIMRT     | 1906        |
| SNAIL        | LKTQLTSKVCCFQLEELMYGRLSKEEVNSLSSEINKKVCFGK---PETGKEM-TQKIKA      | 1911        |
| TRICHOPLAX   | LENQLTSKLGSYKMLKMLYSRLSKQDVNTAESIVKAYTGRP---TEDGKEI-TKSITKA      | 1899        |
| SEA_ANEMONE  | FESQLVSKMCAFRMIEVLYSRLGKAELNSPQSSINLAYCPN----DNTGKEL-TKAITKS     | 1912        |
| PRIAPULA     | YESQLISKICSLKLEELMYACLPKEDVYGDAAALGQVFLASR---PAGSKEL-TPVITRL     | 1924        |
| ESHARK       | FDNQLTRKIGCYKLEEVTYIRLPKDDIYSEDSKINRAFHSS---NMEGNKLLSKSLKLL      | 1926        |
| STERLET      | FETQLTKKNGCYKLEEVLYSRLPKEDVYSKSLINQAFCRPN---KAEGNEL-SKSLLSK      | 1941        |
| COELACANTH   | FDTQVTKKTCGYKLEELVMCSRLPKDDIYSEQSRINQAFHGSC---SAQRNGL-SKTLKLL    | 1929        |
| <b>HUMAN</b> | <b>FDTQITKMGYKILDMYSRLPKDDVHAKESKINQVPHGSC---ITEGNEL-TKTLIKL</b> | <b>1918</b> |
| CAECILIAN    | FDAQIMMKMSYKMLEVMYSRLTKEDIYSKGSRIQAFHGSS---NAEGNEL-TKILVKS       | 1931        |
| PLATYPUS     | FDTQVTKKLGYYKMLEMMYSRLPKDDVHSKESRINRAFHGSS---VIEGNEL-TKTLIKS     | 1922        |
| CANARY       | FDTQVTKMGYKILDMYSRLPKDDVHSKESRINQAYRGS---SVEGNEL-TKTLIKS         | 1920        |
| OSTRICH      | FDTQVTKKTYKYLEVMYVRLSKEDVYSKDSKINQAYCGSI---SVEGNEL-TKTLIKS       | 1890        |
| TURTLE       | FDTQVTKMGYKILEVMYSRLSKEDIYSKDSRINQAYQGST---NVEGNEL-TKTLIKS       | 1929        |
| ALLIGATOR    | FNTQVTKMGYKILEVLYSRVSKEDVHSKDSQINQAYQGT---NVEGNEL-TKMLIKS        | 1887        |
| SOFTCORAL    | FESQLVSKLCFCFLLALLYARLEKTDVSSMESRINRAYNN-D---VKTGKEL-TMAITKA     | 1919        |
| STONYCORAL   | FESQVTSKLCFCFLLVILYSQFSKSELNTLESTINKAYVGGD---VKTGKEL-TLAITKA     | 1941        |
| ACORN_WORM   | FETQLVSKIGCFELMELVYSRMTKEELNTPQSKVNIYCRDS---VKSCKEM-TMALTKI      | 1944        |
| LANCELET     | LRTQLTNKLCFCFQLEELMYSRLPKEDVNTPPSRIVRAYKGE---VKAGNEM-TTAITKF     | 1944        |
| SEA_URCHIN   | FENQLVSKICYFELIEVLYSRLSKDDLNSKDSALNREYRHHG---VEKGNEM-STALTKA     | 1939        |
| STARFISH     | FQNQLVSKTCCFQLEELMYSRLVKEDLFSMDSAINKAYTN-D---VKTGKEM-TQALTKA     | 1949        |
|              | : : .: . : : :                                                   |             |

NUC194

|              |                                                                     |             |
|--------------|---------------------------------------------------------------------|-------------|
| TERMITE      | AYKYRSETLHDLNLTGNVQLVELFRQSQCAAFNTLVAIISNVKCELRFFTGGLFSENKAK-       | 1933        |
| SHRIMP       | AAK----ISKGELRHDQTHAELRLCACAAYNAIIAVLACVQNDLRFYTNFLFSANPTKG         | 1947        |
| SCORPION     | AIA----ARKENLEGESISKEFCRKYCACAAYNAIIAICCTQTDKSFYSTFLFQENFAKG        | 1945        |
| ALVINELLA    | AHH----TKRENLOQEPVFLLELQRQYRCAAYNTLIAVICCTQTEIKFYNGFLFSENINMG       | 1911        |
| CAPITELLA    | SNA----TKGENMNGETLLIPLRRLALCAAYNTLIAALICTQKEKKFYTAFLFTEENPAKN       | 1971        |
| SPONGE       | CHG----AKSEDLHGDRTHYETRQYHCHAYNTLMSVICTQSKPQFFVGFFLFKEDVVKG         | 1980        |
| OYSTER       | AHE----AKGEDVRGETSCEVLELRQYHCAAYNLLIAVLSSTQTDKAFYTAFLFKEDFAKG       | 1962        |
| SNAIL        | ANN----AKSEDLRGETRSMVELRQYHCHAYNLLIAIICCVQNEHKFYKGFQDNQTSKG         | 1967        |
| TRICHOPLAX   | AHA----CKSDLRGETRSMVELRQYHCHAYNLLIAIICCVQNEHKFYKGFQDNQTSKG          | 1955        |
| SEA_ANEMONE  | AHA----AKSEDMRGETVAFELRQLHCAAYNALLIALISCTQTELKFYTAFLFNENPVKG        | 1968        |
| PRIAPULA     | CYD----ACREDMRGERALLELRQYHCTAYNVCVASVSRKTEPVYSSLLQENPAKG            | 1980        |
| ESHARK       | CYD----AFTENMGTQKLEKRRQYHCAAYNCIMAVVTCIFTEAKFYQGFFLFSEKAEKN         | 1982        |
| STERLET      | CFD----TFTENMAGETQLEKRRQYHCAAYNCAITVISCFSNETKFYQGFFLFSEKPEKN        | 1997        |
| COELACANTH   | CYD----EFTENMAGETQLEKRRQYHCAAYNCAIAVISCIFTESKFYQGFFLFSEKPEKN        | 1985        |
| <b>HUMAN</b> | <b>CYD----AFTENMAGENQLLERRLYHCAAYNCAISVICCVFNEKLFYQGFFLFSEKPEKN</b> | <b>1974</b> |
| CAECILIAN    | CYD----SFSENMAGETQLEKRRQYHCAAYNCAIAVISAFTDAKFYQGFFLFTEKTEKN         | 1987        |
| PLATYPUS     | CYD----AFTENMAGETQLEKRRQYHCAAYNCAIAVISCVFNETKFYQGFFLFTEKPEKN        | 1978        |
| CANARY       | CYD----AFTENMAGESQLEKRRQYHCAAYNCAIAVISCVFNETKFYQGFFLFSEKSEKN        | 1976        |
| OSTRICH      | CYD----AFTENMAGESQLEKRRQYHCAAYNCAIAVISCVFNETKFYQGFFLFTEKTEKN        | 1946        |
| TURTLE       | CYD----AFTENMAGESQLEKRRQYHCAAYNCAIAVISCVFNETKFYQGFFLFTEKPEKN        | 1985        |
| ALLIGATOR    | CYD----AFTENMAGESHLLGKREYHCAAYNCAIAVISCVFNETKFYQGFFLFTEKPEKN        | 1943        |
| SOFTCORAL    | AHA----AKSENMQGETVLLPLRREYHCSAYNLIASVIRSQTLKLFYNGFLFSEDLKSG         | 1975        |
| STONYCORAL   | ARA----ASIEDMRGETVAFELRQLHCAAYNALLIALICCTQTDKLFYVAFFLFSENPIKG       | 1997        |
| ACORN_WORM   | AHA----AKGEDIRGESVLELRLRQYHCAAYNALLIAVSCVQNDIKFYNGFLFAENHAKG        | 2000        |
| LANCELET     | GHA----AKSEDLRGETGLLDLREYHCAAYNALLIAIISCTQTDKLFYTAFLFQENHAKG        | 2000        |
| SEA_URCHIN   | ALG----ARNEDCRGETVAVELRQLHCAAFNCSAIISCVQDNKIFYNAFLFSENHAKG          | 1995        |
| STARFISH     | CHA----AKSEDIRGETNALELRQLHCAAFNALLIAIISCTQTDIKFYNAFLFSENHAKG        | 2005        |
|              | : : * * : : : : : :                                                 |             |

NUC194

Supplementary Figure 2: CLUSTAL OMEGA DNA-PKcs METAZOA VERTEBRATE INVERTEBRATE

|              |                                                                |             |
|--------------|----------------------------------------------------------------|-------------|
| TERMITE      | EVPWGKLVNCKEYALALDWEIIPARRKQLVSI RCQARAQRRETLG-----FASQSV      | 1985        |
| SHRIMP       | EVIWECLVDCSRNLEFDVEINFKPASKKRFVAVRQKLRRETAREEGA-----VVAGTV     | 1999        |
| SCORPION     | EYIWENIDLNKEYTFPIELDT-IERRRKFISVRHENRELNKNTLN-----FASSL        | 1996        |
| ALVINELLA    | ECLWDNLVDQKKEYEFPVELQNPHHK--KLVAIRSEHRESE---NT-----DSSLPSV     | 1959        |
| CAPITELLA    | QLHWNIVDQDVVYEFPLEMENPIERRKKFVSIRTSVRDVPDPSDEP-----TGPASSV     | 2024        |
| SPONGE       | QLLWDNIDCEKKYEFQVDFEAPLKRKQITSI RDDLKQSTAAGNSS--GSPSSSPSTRP    | 2038        |
| OYSTER       | QFVFDNLDDKAYVFSSELKAPLSRKKQYVSI RNEVKESNSQNGE-----ADEGESS      | 2015        |
| SNAIL        | QFLLENIVDRDQKYEFPLELESQFERKKKFAIRSEM QEKQS-----DKDGAIS         | 2016        |
| TRICHOPLAX   | QFLWENLIDMEREYAFIEI ELSYQDKQKTTFRSLREQSRSSVSES ADEAD--SGIAMPAS | 2013        |
| SEA_ANEMONE  | QFLLDNLIDTRKYEFEVELS TPLERKKQMTSIRINARVQS--DQVEEAL----SQGRSV   | 2022        |
| PRIAPULA     | QLLWDNIDCHRRYGFDR ELSAPLQRKRQFVAIRTA VREIDRDADGQ-----GAPLPSV   | 2034        |
| ESHARK       | IFIFENLIEAHRTYNFPVIEIEVPLEKKRRFISIRKEAREAGDGDGSG-----EP        | 2030        |
| STERLET      | QFIFENLIDAKHTYSFPVIEIEVPLERKKKYVAIRKEARQGGEGDSD-----EP         | 2045        |
| COELACANTH   | LYILENLIDMKCSYNFPIEIEVPIEKRRKYVAIRKEARGSTIGDLD-----EP          | 2033        |
| <b>HUMAN</b> | <b>LLIFENLIDLKRRYFPVIEIEVPMERKKKYIAIRKEAREANGDSD-----GP</b>    | <b>2022</b> |
| CAECILIAN    | LLIFENLIDLQRCYTFPVEIEVPLERKKKYVAIRQEARNTANGESD-----AP          | 2035        |
| PLATYPUS     | LFIFENLIDLKRCYTFPVEIEVPMERKKKYIAIRKEARDSVNDNSD-----EP          | 2026        |
| CANARY       | LLIFENLIDLKREYTFPVEIEVPLERKKRYIAIRKEARDAGNSSQD-----EP          | 2024        |
| OSTRICH      | LLIFENLIDLKQYSFPVIEIEVPLERKKRYIAIRKEARDSGNNGED-----EP          | 1994        |
| TURTLE       | LFIFENLIDLKHRYSFPVIEIEVPMERKKRYITIRKEARDAVNRDSD-----EP         | 2033        |
| ALLIGATOR    | LLIFENLIDLKHQYSFPVIEIEVPMERKKRYIAIRKEARDTVNGGPD-----EP         | 1991        |
| SOFTCORAL    | QFLLDNLVDCTKKLHFEMEL SAPLDRKRTLLSIRCEARATRMNSSEN-----YEHGVS L  | 2029        |
| STONYCORAL   | QLLLDNLVDNCRNTYTFEVELSAPLERKKQFRMQR---IPSPKENS L--EESAGRTGLSI  | 2052        |
| ACORN_WORM   | QFFLDNLVDADKVYHFEIEMSPMERKKKFAIRKEVRDASEEDDLQDSAVGL-YGTGGV     | 2059        |
| LANCELET     | QFLLDNLVDTNKLYQFDAEF SAPVSRKKQFVSI RQELRGQDSPEAG-----SS        | 2048        |
| SEA_URCHIN   | QFLLDNLVDPKKEYGFAIEMDAPVERKKRFVAIRTA QARETNTPEES-----GYVSGPA   | 2048        |
| STARFISH     | QFLLDNIDITKNYSFEIEMNAPMERKKRFVSI RNQIQD TVAGSSSQSDSGIEMSGYTG   | 2065        |
|              | ::: : .                                                        |             |

NUC194

|              |                                                               |             |
|--------------|---------------------------------------------------------------|-------------|
| TERMITE      | RYIPASQYLFDSL NEDVTLFDFSTSVVSTE ARP GHDEK-----                | 2025        |
| SHRIMP       | QYM--ASHYLSDSLRE DMSQDFDNNSVVLAMSQTEKSSER----VTGA-----        | 2042        |
| SCORPION     | KYA--PSQYLSDSLSDVDSQDFDSSSEELAFSQDMKNKNRKEEI-----             | 2038        |
| ALVINELLA    | NYL--ASQYLADSSLMDVDSQDFTVSVQTSYTS TPSSKKHKH SRLTKG-----NSK-   | 2010        |
| CAPITELLA    | HYL--ASQYLADSSLTDVDSQDFDGSMSVSSADSSF DNQR-----S-              | 2063        |
| SPONGE       | RYI--SSQYLSDSLSDVDSQDFDTLPHHHYQSGVGG---GAS-----TESSSI-        | 2082        |
| OYSTER       | SLHL--ASQYLADSSLHEDLNQYDF TATPQ--MSEGS PREKVLTV-----RKSSYT    | 2062        |
| SNAIL        | SYHL--ASQYLTESSLSEDL SKYEF TVSGSAQNTSGIPKTKASLR-----KNSSY-    | 2064        |
| TRICHOPLAX   | YHL--SSQYLADSSLNEISQDFD FNSSTVQGYSENN-SIKQIPT-----            | 2054        |
| SEA_ANEMONE  | RYL--SSQYLADSSLSEEVSQDFDSTPVQVNI INYL-KR-----                 | 2058        |
| PRIAPULA     | HYL--ASQYLADSSLSEDL SRYDFNVSTQIRERGD----PRAERKPEGEAEQE EEAAM  | 2087        |
| ESHARK       | QYLS--SQSYMADSSLSEEMSQDFDSTGVQSFYSN SQ---DPRGH-----AVR        | 2030        |
| STERLET      | HYLS--SQSYMADSSLSEEMSQDFDSTGVQSFYSN SQ---DPSAR-----AAR        | 2088        |
| COELACANTH   | QYMS--SQSYMADSSLSEEMSQDFDSTGVQSFYSN SQ---NRAAA-----VVH        | 2076        |
| <b>HUMAN</b> | <b>SYMS--SLSYLADSSLSEEMSQDFDSTGVQSFYSN SQ---DPRPA-----TGR</b> | <b>2065</b> |
| CAECILIAN    | HYLS--SQSYMADSSLREEMSQDFDSTGVQSFYSN SQ---DPTAA-----QFH        | 2078        |
| PLATYPUS     | HYLS--SLSSMADSSLSEISQDFDSTGVQSFYSN SQ---DVKST-----GYH         | 2069        |
| CANARY       | KYLA--SSSYMADSSLSEEMSQDFDSTGVQGFYSN SQ---DVTAS-----STR        | 2067        |
| OSTRICH      | KYLP--SASYMMDSSLSEEMSQDFDSTGVQGFYSN SQ---DVTAS-----SPR        | 2037        |
| TURTLE       | QYLP--SASYMVDSSLSEEMSQDFDSTGVQSFYSN SQ---DPTAS-----SIH        | 2076        |
| ALLIGATOR    | QYLP--SASYMVDSSLSEEMSQDFDSTGVQSFYSN SQ---DPTAT-----SAR        | 2034        |
| SOFTCORAL    | RYL--SSQYLADSSLCEEVSQDFDSTPIQALSQSESTEQD-IA-----GG---E-----   | 2072        |
| STONYCORAL   | HYM--YSQYLADSSLSEDISQDFDSSPIQVHSGTEA--RQPLY-----              | 2091        |
| ACORN_WORM   | RYL--SSQYLADSSLSEISQDFDMNTGCLYHTNLCMSIFACMLHVLPH-----         | 2107        |
| LANCELET     | RY--MQSYLAGSSLSEDISQDFDSTSGTQVKHSQTFSS TQERYSQASQG-----SSRL   | 2098        |
| SEA_URCHIN   | HYL--SSQYLSDSLSEDVNQDFDSSSVRHFGSSM-ESQRDGGSQSQGS---QRPGSM     | 2101        |
| STARFISH     | RYL--STQYLANSSLSEDIQDFDSSGGVQQFNASI-DKQQLSQRSSVPH-----IKK     | 2115        |
|              | : ** : :                                                      |             |

S2056

NUC194

Supplementary Figure 2: CLUSTAL OMEGA DNA-PKcs METAZOA VERTEBRATE INVERTEBRATE

|              |                                                                   |             |
|--------------|-------------------------------------------------------------------|-------------|
| TERMITE      | -----T----PKESGAESTEVILESDDLNMHECMATLCGVIEHMDVQGISPTPDAETKD       | 2075        |
| SHRIMP       | -----NEMGG---VLMFVHMDQSDYNGHEVMANLTAVINHMVDAEIMVLHKGDTVP          | 2090        |
| SCORPION     | ----DSNPSNEAKDDDLVSNITVVELEIDDLNQHCEMNSLTMVLVQHMEKIQLL-----SSSP   | 2090        |
| ALVINELLA    | EDKDVLDTEVTVQGDY-----VEIEMDELNKHCEMAPLIGLLKHMARNNI TPSVTKGETP     | 2065        |
| CAPITELLA    | RESSIEVPDVVLKEHY-----IEMEDALNQHPCMAALSALLQHMKNLQITPEVEKGSKP       | 2118        |
| SPONGE       | ----DEDSGNSQEASSYVVSVEEQLEEDDLNIHECMTPLMKLLDHMI INKITPAPSGD--S    | 2136        |
| OYSTER       | DEEDDTDKVMVEDDY-----VELEMDLNOHEGMANMIALLKHMQRAKI IPLVESHG-VV      | 2116        |
| SNAIL        | ----GGDNKVRLDGDY-----VELEMDALNSHECMAPLVALLKHI HKNNIFPAAQSDASS     | 2115        |
| TRICHOPLAX   | ---RETGDSEKAKTI INKFADEELELDDLNKHCEMALLTLLDHMAVNKINPAIEKDTTP      | 2111        |
| SEA_ANEMONE  | -----TGKPDQLG-EDSYEIGEDVEMDELNSHECLTKICSLLTHMKESNISQPDKGALP       | 2112        |
| PRIAPULA     | DVNEEESGSATLAGDY-----VEMEMDELNOHECMASVALINHLATTVCP--IQAASSP       | 2140        |
| ESHARK       | SRRKEQAELSVVQSDI-----MELEMDLNOHECMAMPALINHMQRNNI TPQVEEGKTP       | 2128        |
| STERLET      | GRRRERVE-SLVQDDV-----VELEMDLNOHECMASMTALLNHMQRNNI TPKVDEGTVP      | 2142        |
| COELACANTH   | SRRKERTE-SVVQDDV-----MEFEMDELNOHECMAAMTALINHMQRNKI TPQVEEESGP     | 2130        |
| <b>HUMAN</b> | <b>FRRREQRD-PTVHDDV-----LELEMDLNRHECMAPLTAIVKHMHRSLGPPQGEEDSV</b> | <b>2119</b> |
| CAECILIAN    | SRKREHPE-FTVQEDV-----MEFEMDELNOHECMAAMTGLIKYMQKTQITPKVEEGTVP      | 2132        |
| PLATYPUS     | FRRREYRD-PVTQSDV-----LELEMDLNOHECMATMTALIKHMQRNNI TPKVEEGSGS      | 2123        |
| CANARY       | FRRKEPTE-YKVLNDE-----MELEDEFNOHECMASMTSLIKHMERNI TPKVEEGTVP       | 2121        |
| OSTRICH      | FRRKEPTE-YMALDDD-----TELEMDLNOHECMASMTTLIKHMQRNNI TPKVDEGTVP      | 2091        |
| TURTLE       | FRRKEPTE-SMDPDDL-----MELEMDLNOHECMASMTTLIKHMQRNNI TPKVDEGIVP      | 2130        |
| ALLIGATOR    | FRRKESTE-SMVLDD-----MELEMDLNOHECMATMTTLIKHMQRNNI TPQVDEGAVS       | 2088        |
| SOFTCORAL    | ---NSGTPASPKESSDISSEEELEMDLNRHDCMTTLVGLINHLVKNKISFPQEQGKEA        | 2128        |
| STONYCORAL   | -KLNESSTAEQTDDWYEVSEDTLEMDLNRHESMAKMISLLKHLVDDKISPEQVKDVPP        | 2150        |
| ACORN_WORM   | FVFSLLPPSAFVKGDY-----LEMEMDELNOHECMASMTALIKHMQRNNI TPQVQKGAAP     | 2162        |
| LANCELET     | QARQQQDSSVNIHGDF-----LEIEMDELNOHECMSSMSAVLQHMARNNI TPQVQKGAAP     | 2153        |
| SEA_URCHIN   | ASRQDSKPVFSPGGEY-----LEMEEDALNOHECMAAMTGLIKHMQRNNI NPDITKATKA     | 2156        |
| STARFISH     | RYSNEETPTVVVQGEY-----IEMESDALNOHECMASLTAIVKHMQRNNI TPQVQKGAAP     | 2170        |
|              | . : . * * : : : : : :                                             |             |

NUC194

|              |                                                                     |             |
|--------------|---------------------------------------------------------------------|-------------|
| TERMITE      | --AALPPWMESMRKCLSDYS--QPRNIRLFLFKIILNVESKFHPYAHHWMNSILKAITD-        | 2130        |
| SHRIMP       | KATDVQWMTLVQQKLDSD--TPRNVKLFLLRVMNNARIFEPYAAHFVSTILTCLVD-           | 2147        |
| SCORPION     | --KEIPKWLNDLCKKLEDYS--VHRNIKLFTKLFINNAEIFKPYAVFLQLPLINLILN-         | 2145        |
| ALVINELLA    | --ASLPTWMSNIKNKLQCP--TSRNRFLFLVLIINTEEVFKPYAKDWFGLVQIITR-           | 2120        |
| CAPITELLA    | --SSMPDWMKNIHDKIKNSD--TQLNIRLFLAKVILNGESVFRPYASFVQPLVALAT--         | 2172        |
| SPONGE       | --PEMPPWMTPLHKRMTDSR--TGRNIKLFIIVRLITNRPKIFQPYAKHWLPLVLTQFILSG      | 2192        |
| OYSTER       | --PELPAWMKLNLDKLRSPR--THNNIKYFITKLIINTAEIFRPHYARDWIRPLTQLIIS-       | 2171        |
| SNAIL        | --QDMPQWVFLHDKMTKNTGSDTLNIRLFIKLIINTSEIFQPFARLWLRPLCQLILS-          | 2172        |
| TRICHOPLAX   | --SEMPSWMVALRKKASDHT--TNRNIRLFIKLIINRPKIFRPHYAKFWLPLIQLIV--         | 2165        |
| SEA_ANEMONE  | --KDMPSWMSALHKKLTNFE--THLNIQLFIKVIINQSQVFEPYARFWLSPLMELILKL         | 2168        |
| PRIAPULA     | --AHMPAWMELLHGKFSHVE--TPLNVRVFIARLVVLCALAHFRPCASWLAFLMHLVNV-        | 2195        |
| ESHARK       | --QELPPWMKFLHGKLGNS--IPLNIRLFIKLIINNSEEVFRPHYAKEWLGPLLQLVVS-        | 2183        |
| STERLET      | --ADLPPWMKFLVHGKFGNAS--THLNIKLFIAKLIINTEEVFRPHYARHWLGPLLQLVVS-      | 2197        |
| COELACANTH   | --VELPPWMKFLSHKLANPA--TPLNIRLFIKLVINTEEVFRPHYAKHWLGPLLQLVVS-        | 2185        |
| <b>HUMAN</b> | <b>--RDLPSWMKFLHGKLGNI--VPLNIRLFLAKLVINTEEVFRPHYAKHWLSPLLQLAAS-</b> | <b>2174</b> |
| CAECILIAN    | --QDLPWMKFLHGKLGNTS--TPLNIRLFIKLIANTEDVFRPHYAKQWLGPLLQLVVS-         | 2187        |
| PLATYPUS     | --TNLPPWMKFLHGKLANPL--GALNIRLFLAKLIANTEEVFRPHYARHWLGPLLQLVVS-       | 2178        |
| CANARY       | --ADLPLWMKFLHGKLGNS--VPLNIRLFIKLIINTEEVFRPHYAKHWLGPLLQLVVS-         | 2176        |
| OSTRICH      | --VDLPLWMKFLHGKLGNS--VPLNIRLFIKLIANTEDVFRPHYAKQWLGPLLQLVVS-         | 2146        |
| TURTLE       | --RDLPPWMKFLHGKLGNS--MPLNIRLFLAKLIINTEEVFRPHYARQWLGPLLQLVVS-        | 2185        |
| ALLIGATOR    | --VALPPWMKFLHSGKLGNS--VPLNIRLFLAKLIINTEEVFRPHYARHWLGPLLQLVVS-       | 2143        |
| SOFTCORAL    | --NEMPPWMSYLHKKLSHHS--SELNVRVFIKLIINLPEVFEPYAKFWLDSLMELILL-         | 2183        |
| STONYCORAL   | --TDMPAWMAPLHKKIASS--THLNIKLFIAKLIINEAKIFEAHAKFWFNPLMELILQI         | 2206        |
| ACORN_WORM   | --HELPGYMSYLQKKLSGSP--TNPVKLFIKLIINAEVFRPHYAKFWLAPLMEMWILG-         | 2217        |
| LANCELET     | --KDMPPWMSCLNKKLGGSS--THKNVKLFLAKLIINNEEVFRPHYARFWLSPLMEMIVR-       | 2208        |
| SEA_URCHIN   | --EEMPQWMSGLQKKLSSQS--TEHNIKLFIVRLVINAQDVFRPHYARFWLSPLMQFLAG-       | 2211        |
| STARFISH     | --SEMPGWMASLQKKLTSQS--THVNIKLFIARLIINNNEVFTPHYARFWLSPLLQLLIS-       | 2225        |
|              | : * : : : * : * : : : * * . :                                       |             |

NUC194

Supplementary Figure 2: CLUSTAL OMEGA DNA-PKcs METAZOA VERTEBRATE INVERTEBRATE

|              |                                                                     |             |
|--------------|---------------------------------------------------------------------|-------------|
| TERMITE      | ---GV-----VG--RAPNYLLSDTVAMLADWCRKTTSLPAKSDHHLVSQLLYLLISKVHH        | 2180        |
| SHRIMP       | ---GT-----IG--DKINYPFCDDVMVMVMGWSKAVPQDVTVMGRNIVGRVRLRYLCMNTPO      | 2197        |
| SCORPION     | ---AT-----FG--REINYPFLDLMVVLSSWSSIAIPEDSSIGRHAASGLLEFLMSKCFH        | 2195        |
| ALVINELLA    | ---GD-----LGT-NGINYMISDLTITLLSWHTVAIPEDNSADKAMACQLLKVLVASCHH        | 2171        |
| CAPITELLA    | -----NM-GGLNYFSLDIIIVTLLSWHEIAIPEETVTDIAMTSHLVKYIVQNCYH             | 2220        |
| SPONGE       | DSTAGMGGAVGGGGLDYFTVDAIATMLSWSSTAIED----RFLGSQLELEYIMLRSNH          | 2248        |
| OYSTER       | ---GL-----F---TGLNYFVIDIVVTIMSWHQVAIPQDVTVEDRAMSSRLVEFVMGYVYN       | 2220        |
| SNAIL        | ---TS-----LCD-NGINYPIMDLLVTMLSWSHSTAVPQNSSTERAMASRLVEFLVRNVHH       | 2223        |
| TRICHOPLAX   | ---EG-----KES-DGIHYFIVDLMIILLSWADVAIPKQVD-EILQANRLMEFLMRNAFY        | 2215        |
| SEA_ANEMONE  | IEEEG----ENK-RGLNYFVVDLLVTLLSWATTAIPEDSYGDRHLASRLVQTMVRTRTH         | 2222        |
| PRIAPULA     | ---GN-----CGVAAIHSLTADVVMVLSWTPVARPQDNMTERSLASRLLEFLMRNARH          | 2247        |
| ESHARK       | ---GN-----NGG-DGIHYMVVEIVVTVLSWTSVATPKGNMKDEILANRLLEFLMKNSFH        | 2234        |
| STERLET      | ---GN-----NGG-EGIHYMVVEIVVTVLSWTSLSAPKGNTRDEILANRLLEFLMKNAFY        | 2248        |
| COELACANTH   | ---GN-----NGG-EGIHYMVVDIVVTVLSWANIAAPKGNTRDEILANRLLEFLMKNTYH        | 2236        |
| <b>HUMAN</b> | <b>---EN-----NGG-EGIHYMVVEIVATILSWTGLATPTGVPKDEVLANRLLNFLMKHVPH</b> | <b>2225</b> |
| CAECILIAN    | ---GN-----NGG-DGIHYMVVEIVVTVLSWANVATPAGLAKDEILANRLLEFLVTHSFH        | 2238        |
| PLATYPUS     | ---GE-----NGG-EGIHYMVVEIVATVLSWTSIATPTGVTKDELLANRLLEFLMKHVPH        | 2229        |
| CANARY       | ---GN-----NGG-EGIHYMVVEIVVTVLSWTSVATPKGNIKDEILANRLLEFLMKNAFH        | 2227        |
| OSTRICH      | ---GN-----NGG-EGIHYMVVEIVVTVLSWTSVATPKGNIKDEILANRLLEFLMKNAFH        | 2197        |
| TURTLE       | ---RD-----NGG-EGIHYMVVEIVVTVLSWTSVATPKGNIKDEILANRLLEFLMKNVPH        | 2236        |
| ALLIGATOR    | ---RD-----NGG-EGIHYMVVEIVVTVLSWTSVATPKGNVKDEILANRLLEFLMKNTFH        | 2194        |
| SOFTCORAL    | ---PT-----FKN-SELNYFVIDIVVTMLSWSSVTIPEDSYSSRRLTSRLLEYLMETCNH        | 2234        |
| STONYCORAL   | KDTEP----AGT-EGINYPFIVDLVVTLLSWSTTAIPEDSHNDRHLASRLGFLMSRTRH         | 2260        |
| ACORN_WORM   | ---GQ-----TGG-DGIHYMIGDIVVLMVLSWISAIKPEAGD--RILASRLVEYLMHHTHH       | 2266        |
| LANCELET     | ---GE-----ASG-EGINYPFIVDLVVTMLSWGPVAIPEDSAMGRALTSRLHFLMANAFH        | 2259        |
| SEA_URCHIN   | ---GQ-----GINYMLVDIMLVMLDWSSTLAVPEDNR----LASGLRFLMKNSYH             | 2256        |
| STARFISH     | ---GN-----TGG-EGIHYMVVDVVVLLGWVTVAIPEDKR----LANRLLEFLMHFCHH         | 2272        |

NUC194

|              |                                                                     |             |
|--------------|---------------------------------------------------------------------|-------------|
| TERMITE      | DRRDVFKHNLELIRTVVELWKNPFDIPVQLLYDMIKMHDRKDPTVSEPGIQVAAILANR         | 2240        |
| SHRIMP       | TRADIFKYNLDVVRVSVVECWKSLTVPYTYVIYSLMEVKDGA-EREVEAGLQLLGIILANG       | 2256        |
| SCORPION     | IRKDVFRNNLEMIKTVVQCWKERLDIPYTIIFESMRNLDTK-VKDNIVGIQLFGIIVSNG        | 2254        |
| ALVINELLA    | DSQQILKNNLELLKVLVEVWKPRLVPTNLIYENFSHYDLK-TKRNMGTGIMTGVILANG         | 2230        |
| CAPITELLA    | QNRQIMRNNLEVLKTLVEAWKSTIRIPTQDIYENFIDREDK-GKRNVVGLQIVGVFLANG        | 2279        |
| SPONGE       | KNRSILRNNLEIVRTMVELWKKIDIPTRVLYDQFSNSDKS-TVSNLSGIQLVGVIAVANE        | 2307        |
| OYSTER       | DTRPVRNNLELLKTLQVWKRDRVEIPYNIYKHLKQPEDT-KKESCVGIQLMGVLSAK           | 2279        |
| SNAIL        | ETRAIFRNNLEMLKTLLECWKDCIEIPYQEVYQNLKMPDPS-SKSSLIIGIQLVGVIMTCN       | 2282        |
| TRICHOPLAX   | PNRSVLRNNLEIIKTAVELWKNHIEIPYRIYKNSNPDKD-KKDNSTGIQCLGLVVANG          | 2274        |
| SEA_ANEMONE  | ENRAVFKNNLEIVKTMVEVWRERVVPTKVIEEALSNPHDP-KKDNATGIQLLGVVLANK         | 2281        |
| PRIAPULA     | ATMSVFRNNLEIIKTLVECWDRDVPVPSQVIYENMCAGDIT-MRDNSVGVQLLGVVVANN        | 2306        |
| ESHARK       | EKTAVFRHNLEIIKTVVECWKDCLSVPYSLIFSRFSSTDPN-SKDNSVGIQLLGIVLANN        | 2293        |
| STERLET      | DKRAVFRHNLEIIKTVIECWKDLAVPYSLIFDRFSGKDPN-SKNSVGIQLLGIVLANN          | 2307        |
| COELACANTH   | EKRAVFRHNLEIIKTVVECWKDCLAVPYSLLYQRFSGKDPN-TKDNTVGIQLLGIILANN        | 2295        |
| <b>HUMAN</b> | <b>PKRAVFRHNLEIIKTLVECWKDCLSIPYRLIFEKFSGKDPN-SKDNSVGIQLLGIVMAND</b> | <b>2284</b> |
| CAECILIAN    | EKRAVFRHNLEIIKTVVECWKDCLSIPYRLIFERFSNGNTN-SKDNSVGIQLLGLIILANN       | 2297        |
| PLATYPUS     | QKRAVFRHNLEIIKTVVECWKDCLSIPYRLIFEKFAFGDPN-TKDNSVGIQLLGIVLANN        | 2288        |
| CANARY       | PKRAVFRHNLEIIKTVIECWKDCLSIPYSLIFQRFSSGDPD-TKDNSVGIQLLGIVLANN        | 2286        |
| OSTRICH      | PKRAVFRHNLEIIKTVIECWKDCLSIPYSLIFEKFSGGDPN-TKDNSVGIQLLGIVLAND        | 2256        |
| TURTLE       | QKRAVFRHNLEIIKTVVECWKDCLSIPYRLIFEQFSGGDPN-TKDNSVGIQLLGIVLANN        | 2295        |
| ALLIGATOR    | QKRAVFRHNLEIIKTVVECWKDCLTVPYRLIFEQFSGGDPD-TKDNSVGIQLLGIVLANN        | 2253        |
| SOFTCORAL    | PTRSIFKNNLEVIKTFVEVWKERIDVPYKLIYERFSNASVN-TKENSVRGIQLMGVIVANK       | 2293        |
| STONYCORAL   | RHRSLFRNNLEIVKSVVEIWKSIHVAEVIKNSFSDPPDV-KKDNAVGIQLLGVVVANG          | 2319        |
| ACORN_WORM   | SNRQVLRNNLEMVKTVELWRDCIEVPSRVIFEAFSGKDPK-GKENATGIQLLGVILSNQ         | 2325        |
| LANCELET     | KTRAVMRNNLELIKTAVECWKTRVEVPTKVIVHDQLCGSDAS-SKANSVGIQLLGVVLANN       | 2318        |
| SEA_URCHIN   | ERKSVMKNNLEVIKTLVECWKDVIVDVPTRVYIYESLQDRSPD-KKDSAVGIHLLGVILANN      | 2315        |
| STARFISH     | SNRQVLRNNLEMIKTLVECWKEIISVPTSVIYRILATPPDP-VKDSSTGLQLLGIVLANG        | 2331        |

M-HEAT/CIRCULAR CRADLE

Supplementary Figure 2: CLUSTAL OMEGA DNA-PKcs METAZOA VERTEBRATE INVERTEBRATE

|             |                                                                    |      |
|-------------|--------------------------------------------------------------------|------|
| TERMITE     | LEPWSST----GKLFRLALLRNI D-TEKRSIFQSSAEVAGMALELLAANGSGMLEGDD        | 2294 |
| SHRIMP      | LPYYTVD--SETEKKRCESLVRLLG-AHYASVYGAAAEV MGLILKYTSQKDGSV--EAL       | 2311 |
| SCORPION    | LDPYQNT--SRIDKISYLKTLTVN LK-NKYKEIYESASEVCGMSMKYYFDKDDDV-YSEF      | 2310 |
| ALVINELLA   | LSPYRPN--SGVDKDRFYKNLAKNMQ-HTSKAVYMSSEAVVGMALKHMTEETEKEEDDKTW      | 2287 |
| CAPITELLA   | LSPWQPD--AEVSKDRFYQYLAMN MN-QPDKQVYSASAEIVGMALSSLQN---TESDKEW      | 2333 |
| SPONGE      | LNPDYDNTAGSLDQGLYKIFVNNLT-FKYKLIYAAA AEVLGMIMKRMAESYDPF-LDRL       | 2365 |
| OYSTER      | FPPYAPT--APVDQEKFFTTVAQYMR-NRYKAVYAA TAEVVGMI FKH LAEKDRQT-EGTF    | 2335 |
| SNAIL       | YAPYGPS--ASVDRNR YFTTLASSMT-NSSKMI FAAAAAEVVG MVFAYLADKENET-DGQF   | 2338 |
| TRICHOPLAX  | LSPYRYD--VEVDEM---LALAENLQ-FKYKEVYEA VAEVLGMIMKHLASVKKET-EGPI      | 2327 |
| SEA_ANEMONE | IHPFSSD--SSVDENTFYTALSDNLT-FKYKD V HAPAAEVS GMLMKYLIEERKVT-ECSL    | 2337 |
| PRIAPULA    | LPYYSHT--TAVDSEKFFQAI VRCLA-NKYKEVYAAA AEVLGMILHRMVEREDEEAEGAL     | 2363 |
| ESHARK      | LSPYVPK--CEIGYERYFQRLVYNI SLTRYKEVYAAA AEVLGLV LHYFAENEKQV-DGLV    | 2350 |
| STERLET     | LPYDYPK--CGIDSESYFQALATN I SFGRFKDIYAAA AEVIGLIMQYLAKNEKQL-EGPI    | 2364 |
| COELACANTH  | LPHPDPT--CSIDMESYVKALANNL SFTRYKEVYAAA AEVLGLV LQYRAEKEKEL-GGPI    | 2352 |
| HUMAN       | LPYDYPK--CGIQSSEYFQALVNNM SFVRYKEVYAAA AEVLGLI LRYVMERKNIL-EESL    | 2341 |
| CAECILIAN   | LPYDYPK--CGIDVERYFQALANNI ALT KYKD IYLA AA AEVLGLALHYVAEKEKTL-EGPL | 2354 |
| PLATYPUS    | LPYDYPK--CGIDSARYFQALANNL SLV KYKEVYAAA AEVLGLTLQYVSEKETML-EDSI    | 2345 |
| CANARY      | LPYDYPK--CEIDRVRYFQALTSN MGLLKYREVYAAA AEVLGLALQYIAERENIL-EDPV     | 2343 |
| OSTRICH     | LPYDYPK--CEIDRVRYFQALISN MGLLKYREVYAAA AEVLGLALRYVAERENIL-EDPA     | 2313 |
| TURTLE      | LSPYDYPK--CEIDSVRYFQDLANNM SLIRYKEVYAAA AEVLGLI LQYMAEKENIF-EGPV   | 2352 |
| ALLIGATOR   | LPYDYPK--CEIDSTRYFQALVNNM ALLKYKEVYAAA AEVLGLTLRYIAEKENIT-EGPI     | 2310 |
| SOFTCORAL   | ITPFPKG--CGVDEKRFYQDLVKNL S-FKYKDVHGAA AEVIGMILKYLSEENDKESCDGL     | 2350 |
| STONYCORAL  | LFVVTSD--STIDEDRFYGTLVN NLT-FKYKD V HAAAAAEVIGLLMQLAKVKKIF-DGPL    | 2375 |
| ACORN_WORM  | LPYDYPK--CGIDKDRFYTTLSANL S-FKYKDVYAA SAEVVG V-MKYMAEKEKVT-DGTF    | 2380 |
| LANCELET    | LPYDYPK--CGIDKDRFYTTLSANL S-FKYKDVYAA SAEVVG V-MKYMAEKEKVT-DGTF    | 2377 |
| SEA_URCHIN  | LHPSPPT--CDVDADR FY SALASNI D-NRYKAVHGAA AEVIGMAMKQMAENDKIT-DGRL   | 2371 |
| STARFISH    | LHPIDKA--SDIDEERFYAALSYNLK-NRYKAVHAAAAAEVIGMAMKQKADVDKVT-DGFL      | 2387 |
|             | * . : :. **: **: :                                                 |      |

M-HEAT/CIRCULAR CRADLE

|             |                                                             |      |
|-------------|-------------------------------------------------------------|------|
| TERMITE     | AE-FLSGIVDKLNL---TKDQSKDKFLTCLFAVQEQEYPRIVD-----            | 2332 |
| SHRIMP      | ED---AVVKRVTEL---TVKMQGGLTCIYNIHKHYPSFVK-----               | 2346 |
| SCORPION    | CK---IVKTEISSL-----NAKDQYLTCLYKINTHFPIFIDS-----             | 2344 |
| ALVINELLA   | HKEFIDHISLLIGF---QSNKPDFRISCVYGMQLHFPTIAD-----              | 2326 |
| CAPITELLA   | CRAYGDNIQKMLLGI---HGNKPDQFLTCHICIQHFSAFVE-----              | 2372 |
| SPONGE      | EE---MVGEQLFKLSQPLEKSEDKFITCLHKITLCYNKIVP-----              | 2403 |
| OYSTER      | HD---YVVNLMNSL---QSNPGNFFLCLHRMHLHYPPIAD-----               | 2370 |
| SNAIL       | HS---HVESVL-----GKVAPHNFFLVCVHCIRHYPPMAD-----               | 2370 |
| TRICHOPLAX  | FD---YVTQHLSSMVSAGRMDVARFILCLYRVQLHYPIAD-----               | 2365 |
| SEA_ANEMONE | IA---LVEAKLSPMATKGGKDIGFITCVHRLQLNYPRIVD-----               | 2375 |
| PRIAPULA    | RD---AVVTAMSTL---HADAKQNFIVCLQKMTLHYPAIADREVMTAVSDRYLGQVCGD | 2416 |
| ESHARK      | HD---LIAKELKQL---QSKEDKFI VCLSKIVKNYPPFADR-----             | 2386 |
| STERLET     | FD---FTVKELKHL---QNTKEDKFVECLSKVVKNFPPFVLD-----             | 2399 |
| COELACANTH  | ID---SVVRELKQL---QSIKEDKFI VCLSKIVKNFALLAD-----             | 2387 |
| HUMAN       | CE---LVAKQLKQH---QNTMEDKFI VCLNKVTKSFPPFAD-----             | 2376 |
| CAECILIAN   | FD---CVIKELKQH---QNAKEDKFI MCLNKVVKNFSPFAD-----             | 2389 |
| PLATYPUS    | CE---LIVKQLKQH---QNSREDKFI VCLNKAVKNFPPFAD-----             | 2380 |
| CANARY      | YD---CVIKQLKHH---QNTQHDKFI QCLNKVVKNFPPFAD-----             | 2378 |
| OSTRICH     | YD---CVIKQLKHH---QNTQDDKFI QCLSKVVKNFPPFAD-----             | 2348 |
| TURTLE      | YD---CVIKRIEQH---QSTKEDKFI VCLNKVAKNFPPFAD-----             | 2387 |
| ALLIGATOR   | YD---CVVQLKQH---QNTKEDKFI LCLNKVVKTFPPVAD-----              | 2345 |
| SOFTCORAL   | SG---LLNEKLSS---MTKDLDKFI LCVHQLQIHFPPIVD-----              | 2384 |
| STONYCORAL  | HD---MVGQKLLSLVNRAPPELDFITCVHKLKLNYPPIVD-----               | 2413 |
| ACORN_WORM  | HD---NVFREISSS---QSSRPEVFI TCIYKQLYKPFPTD-----              | 2415 |
| LANCELET    | HT---QVERYLLPL---QVNQDDVFI TCVHKLHLHFPFAD-----              | 2412 |
| SEA_URCHIN  | HE---VTYKELSQLH---LGSKEVIFI TCLHKIHLHYVPFAD-----            | 2408 |
| STARFISH    | HS---IVTSELTKI---SEIKPDVFI TCIHKLHFHYPEFAD-----             | 2422 |
|             | : : * : :                                                   |      |

M-HEAT/CIRCULAR CRADLE



Supplementary Figure 2: CLUSTAL OMEGA DNA-PKcs METAZOA VERTEBRATE INVERTEBRATE

|             |                                                                |      |
|-------------|----------------------------------------------------------------|------|
| TERMITE     | AFMNHVLFHLPKTYGIFRTMCLKIVYSRLEILGDDTYAEMKSKNLFKTLSDRDPDQONLA   | 2392 |
| SHRIMP      | RLINKLLNLLPKLYGIHRKNVLECLIAHSATM-EDIYHLHKEQNLLEDLAKKEASTQLVA   | 2405 |
| SCORPION    | SFLNKLLYMLPNVHGIFRKQLEIINSHVENI-ENAFaelknQGLLNMLEHRDESIOFSS    | 2403 |
| ALVINELLA   | GFLAKVLFILPKVHGEFKTHSLEILQNRISQI-DNAFLEMKSKGISDILSQRNEANQHAA   | 2385 |
| CAPITELLA   | RFIHKVLFMLPGLYGVFRTYALEIIAAGIENI-EGAFVEIKNKNIIGILRERDELSQLMS   | 2431 |
| SPONGE      | RFVEKLLFLLPSLQGVFRSSCLEILDTOADVQ-PQFYLKLKDKGFHTMISHRDEATQTAS   | 2462 |
| OYSTER      | RFMNRLLFVLPNLHAEFRNRCLIVLTRIDTL-ENVYVELKSKGLLAFLTRDDEATQVIA    | 2429 |
| SNAIL       | RFLNKLFLMLPGLHGEFRVQCLEVI MGCIEQL-DDAFRELOSKGLLNFLTQRDEDTQIVA  | 2429 |
| TRICHOPLAX  | RFVNKVLFLMPSLYGEFKTKCLEIILARADHI-KELYTELKSKGLKDMLLHRDESKQVVS   | 2424 |
| SEA_ANEMONE | RFMKHIMFHLPTIHGVFKAQCLEIVLSRVSDI-PDLFTELKSKGLNVMFEHRDEGVQVAL   | 2434 |
| PRIAPULA    | RLMSKLLFMLPSLQGSFRSQCLEVILTRVAHT-QNLFLELKSkgfLGMITHRDEATQLAS   | 2475 |
| ESHARK      | RFLNQVFYLLPKLHGVLKTHCLEVVMHRAETI-IDIFQELKNKNFVQIMSYSDEERQRIC   | 2445 |
| STERLET     | RFLNAVLFLLPKLHGVLKTHCMEILMSRAEEV-TDIYLOLQKSKDFAQIMSHRDEMQRVC   | 2458 |
| COELACANTH  | RFMSVVFLLPKLHGVLKTHCLEVMSRAEEI-PDIFLOLQKSKDFIQLMHRDDARQRVC     | 2446 |
| HUMAN       | RFMNAVVFLLPKFHGVLTTLCEVLCRVEGM-TELYFOLKSKDFVQVMHRDDERQKVC      | 2435 |
| CAECILIAN   | RFMTVVLFLLPKLHGVLKTYCLEVVMCRAEEI-PDLYIQLKSKDFNQIMSHRDDRQKVC    | 2448 |
| PLATYPUS    | RFLNAVVFLLPKLHGVMKTFCLEVLCRAEEI-TDLYLOLQKSKDFAQVMHRDDERQRVC    | 2439 |
| CANARY      | RFMNAVFLI PKLHGVMKTYCLEVIMCRAEEV-PDLHLQLKSKDFIQIMNHRDDERQRVC   | 2437 |
| OSTRICH     | RFMSAVFLLI PKLHGVMKTHCLEVIMCRAEEI-TDLHLQLKSKDFIQIMNHRDDERQRVC  | 2407 |
| TURTLE      | RFMNAVFFLI PKLHGVLKTYCLEVVMYRAEEI-TDLYLOLQKSKDFIQVMSHRDDERQRVC | 2446 |
| ALLIGATOR   | RFINAVFFLLPKLHGVLKTSCLEVVMCRAEEI-TDLYLOLQKSKDFMQVMNRRDDERQRVC  | 2404 |
| SOFTCORAL   | GFINQILFVQHVHAQKTLCLEIILSRVGI-PNLFLELTKGFLNLTTRDDEATQVAC       | 2443 |
| STONYCORAL  | RFVNQILFLLPSVHGDFKSYCLEILCSRVEHI-PNLFTELKGRGLKEMLSQRDDGIQIGV   | 2472 |
| ACORN_WORM  | RFINKLLFMLPQIHGQPKTYALEVVLGRVDSI-DKIFLEMKNKRILEMLRHRDETQOLVS   | 2474 |
| LANCELET    | RFVSKLLFMLPKLHGIFRTHCLEVIRGRVNI-DNLFLELKRNFGLMTHRDDGLQAIIV     | 2471 |
| SEA_URCHIN  | RFMNKLLFMLPSIHGQPKTECLQIITARIEHI-DNAFIEMKNKNI LALLTHKDEADQLTS  | 2467 |
| STARFISH    | HFTNKLLFMLPSLHGQPKTLCEVVASRVSHI-PNIFLEMKSKGIVELLTRDEGTQLVS     | 2481 |
|             | : : : . : : : . . . : : : : *                                  |      |

M-HEAT/CIRCULAR CRADLE

|             |                                                                |      |
|-------------|----------------------------------------------------------------|------|
| TERMITE     | LSIVHKMVPHLKPEQLEELVHE-ICKFETQRSVKCRSVMYEILKWIYDHCQDIGG-----   | 2446 |
| SHRIMP      | LQLVNAVMPRLTPSQLLYFMPG-VVAFASHPAPSCRETMYDVLFWVYDNFSNNDT-----   | 2459 |
| SCORPION    | LNIIQKLLKELDIDKMLNVFPI-ISKVHKSaETICRKVMYIEMHAYEKFNTKNG-----    | 2457 |
| ALVINELLA   | LRLVKGLCNQKPAEILYLLPV-LTEFASHPSASCRaQMYNILLMWIYDNYRDDGT----    | 2440 |
| CAPITELLA   | LKIIRLLEKLEASQLLYLLPA-ICEISDLSVLCREMYQILMWCYDNYKDEAQS----      | 2486 |
| SPONGE      | LSIVQKLLVQLTNDQLSEIVPILIASFSKHGSIQCRIVLYNILLMRVYNKLTDDQSESD-   | 2521 |
| OYSTER      | LKIVKSIQSKLQPSVSELLPL-ICGFCVSPSIPCRNVMYDILMWVYDNYREDES-----    | 2483 |
| SNAIL       | LGIVNAMVPKLSATELQTFPLPA-ITGFSNHPSVTCRQIMMKILLMWYDNYRDNES-----  | 2483 |
| TRICHOPLAX  | LDLVRAMLKNLDISQILYLAEL-VATFKTNPSAACRQKMYGIFMWIYDTRFQEIDK--N-   | 2480 |
| SEA_ANEMONE | LKI IQGLLEKLMSEIEYVVPs-IATMATSSSTACRELIYDIFMWVYD TYRSDETF RNE- | 2492 |
| PRIAPULA    | LHITNALLSSLSPGELLFLLPA-VTSGITHPRAPCRQLMYDILMWVYDSYRDSEG-----   | 2529 |
| ESHARK      | LDIVYKIIAKLKAEEVKVFLVP-VIAFISHPSVPCRERMYDILMWIYDNYRDAES-QSD-   | 2502 |
| STERLET     | LDIVHKILAKLPVELKELLIS-VTAFTHPSVPCRERMYDILMWIHDNYRDPES-QSD-     | 2515 |
| COELACANTH  | LDIVYKIMFKLPVEMKEFLVA-VTGFISHPSTVPCRERMYEILLMWIHDNYRDQES-QAN-  | 2503 |
| HUMAN       | LDIIYKMMPKLPVELRELLNP-VVEFVSHPSTTCREQMYNILLMWIHDNYRDPES-ETD-   | 2492 |
| CAECILIAN   | LDIIYKMLPKLKPMELGELLNT-VVTFSSHSPMCRERMYDILMWIYDNYRDPES-QAN-    | 2505 |
| PLATYPUS    | LDIIYKMLAKLPGELELLNV-VVEFISHPSVPCRQMYNILLMWIHDNYRDPES-QAD-     | 2496 |
| CANARY      | LDIVHKMLSKLKPLELKELLPG-VTGFISHPSVPCRQMYDILMWIYDNYSDPES-QAD-    | 2494 |
| OSTRICH     | LDIVYKMLPKLKPLELKELLPG-VTGFISHPTVICRQMYDILMWIYDNYSDPES-QAD-    | 2464 |
| TURTLE      | LDIVYKMLPKLKPLELRELLPG-VTGFISHPSVPCRERMYDILMWIYDNYRDPES-QAE-   | 2503 |
| ALLIGATOR   | LDIIYKMLSKLKPLELRELLPG-VTGFISHPSVPCRERMYDILMWIYDNYRNSES-QAD-   | 2461 |
| SOFTCORAL   | LRILGRLSQMSVGDITQLLPS-VTDFLSSKSVACRGLMFDILWIYD TYRFD ETFK NED  | 2502 |
| STONYCORAL  | LRI IKHLMKKTIPELKFIPL-LTSFVSHPNLLCRDLMYDIFIWIYDSYRADEAFQAE-    | 2530 |
| ACORN_WORM  | LKIVNSMLKRLNEEELLYLMP-TVVSFSKNLSPACRETMYDILTWIYDNYKDEES-ST--   | 2530 |
| LANCELET    | LQIVYALLQKLVKEELLYLLPS-VAAFASHPAPECRRTMYDILMWIYDNYREAS-QQE-    | 2528 |
| SEA_URCHIN  | LKLVGDMLPKLKPSELRYLLPA-VKDFVSHSPSPCRDTMYSILLMWIYDNYRDEDK-REG-  | 2524 |
| STARFISH    | LKLVNAMLPNLPKDEILYLLPP-VRTVFNLPSPACREVMYDILMWIYDNYRDEES-RTE-   | 2538 |
|             | * : : . . : : . ** : : : :                                     |      |

M-HEAT/CIRCULAR CRADLE

Supplementary Figure 2: CLUSTAL OMEGA DNA-PKcs METAZOA VERTEBRATE INVERTEBRATE

|              |                                                                    |             |
|--------------|--------------------------------------------------------------------|-------------|
| TERMITE      | -----VLEEAKGILLKGLRDDDPHLQDSIFEFYWNDAQQRDASTDRLLFILTDLYCPA         | 2501        |
| SHRIMP       | -EDGHQLESQARGVLLRAVKEEDAALRQIVLNFWLQGAR-SMTLT-QCLLHILRKMYSPE       | 2516        |
| SCORPION     | -IKEKEISRYAKEMLLHGLADSDLTLRLLTVHNFWSQNNH-LPAETFSRIKAVLQKMYSP       | 2515        |
| ALVINELLA    | -DT-EQIIQSVKETLLRGLSDKDIKNRVTLQNFWSHSTR-LPDSTVDRLVALLETMYSPA       | 2497        |
| CAPITELLA    | -ESRDEIITLTKDVLRLGLSDDDLTNRLTVQNFWSHETR-LPGETVERLVAMLEAMYP         | 2544        |
| SPONGE       | -DSVKMIRSISRDLQLLGLGDESNEVKLKMIEYWNQESN-LSSNTLDRLTQLLVTLYSK        | 2579        |
| OYSTER       | -ETADTIMQQTKESSLKGLGDEDMQCRLLVNFWSSETR-VPGNTLDRLVAMLEAMYSV         | 2541        |
| SNAIL        | -KEGQEIFMKVTQESLLQGLCDNHLHCRMTQNFWSSESR-LPDGTVDRMISILEAMYP         | 2541        |
| TRICHOPLAX   | -DETKQLINFCQDQLLQGLNDSSEENRLQLINFWSNNNR-LPSGTLERLSSVLYALYSN        | 2538        |
| SEA_ANEMONE  | -EGSEEILATAKDYLLRGLADNKKILKLLQNFWSDETR-LPNTTLERLVDVLRAMYSTN        | 2550        |
| PRIAPULA     | -EEEDKLASLARDSLLQGLNDSDDSLRMIVTNFWSHATR-LPTQTLPRLLAIAQTYLSPA       | 2587        |
| ESHARK       | -PDSKAVFVTTKDTLLQGLTDDNPALQLYVRNFWSHENR-LPTGTHDRMLAILRSMYSN        | 2560        |
| STERLET      | -SVSTEVFNLAKETLLQGLTDENQGLQLYVRNFWSHESR-LPTSTLERMLVLRSLYSSK        | 2573        |
| COELACANTH   | -NESREVLKLASEVLLQGLTDENPGLQLYVRNFWSDENR-LPVGTLDRMLVILKAFYCNK       | 2561        |
| <b>HUMAN</b> | <b>-NDSQEIFKLAQDVLLQGLIDENPGLQLIRNFWSHETR-LPSNTLDRLLA-LNSLYSPK</b> | <b>2549</b> |
| CAECILIAN    | -DDSQEVFSRANDVLLQGLIDENAGLQTVRNFWSETR-LPVVTTDRMLALLNSFYSPK         | 2563        |
| PLATYPUS     | -EESREVFKLAKELLLQGLVDENHGLQLIVRNFWSETR-LPSNILDRLA-LNSFYSTK         | 2553        |
| CANARY       | -DDSEILKVAKEVLLQGLIDENAEQLIVRNFWSETR-LPTNTLDRMLLSSFYSTK            | 2552        |
| OSTRICH      | -GDSQEVKLAKELLLQGLTDENAEQLIVRNFWSETR-LPANILDRMLALLNSFYSTK          | 2522        |
| TURTLE       | -EESQEVFKLAKEMLLQGLMDENSGQLIVRNFWSETR-LPTNTLDRMLALLNSLYSTK         | 2561        |
| ALLIGATOR    | -EDSQEVFKVAKEMLLQGLTDEISELQLVVRNFWSDETR-LPTNTLDRMLALLNSFYSTK       | 2519        |
| SOFTCORAL    | SEGSEVLCRTKNVLLQGLADENKEMRLKLRNFWSDETR-LPNSTLERLVQVLRAMYSPI        | 2561        |
| STONYCORAL   | -EGSADILADAKDHLQGLADHHRDLQLKLRNFWSDEAR-LPGTTLERLVEVLRALYSTT        | 2588        |
| ACORN_WORM   | ---AAEVLSTKEILLQGLSDEESYLRLRVSNFWSETR-LPVGTLDRMVSMLECMYSPD         | 2586        |
| LANCELET     | -S-AGRVLTGAKDCLLQGLSDEESYLRLRVSNFWSETR-LPTGTLERLVAMLECMHSPR        | 2585        |
| SEA_URCHIN   | -QGDDEALSIAKDTLLQGLSDQDNYLRLRVSNFWSETR-LPKETLERLISMLGCMYSPG        | 2582        |
| STARFISH     | -DGADDILCAKDTLLQGLSDEEASHRLRVSNFWSETR-LPTGTLERLVAMLECMYSPG         | 2596        |

\* : . : . : : : : \* . : : :

M-HEAT/CIRCULAR CRADLE

|              |                                                             |             |
|--------------|-------------------------------------------------------------|-------------|
| TERMITE      | TEHIF-----LGYSTQYLLLEATAGTP                                 | 2522        |
| SHRIMP       | TEDSF-----LQMAIYVLLLEATRHSA                                 | 2537        |
| SCORPION     | IEHMFSSDECFITYISLIVDNFWSNEKRLPLGTVERLIALMKNMLQYSTFLMEMTSKSP | 2575        |
| ALVINELLA    | SEHQY-----LYATNLLLEMTSRSP                                   | 2518        |
| CAPITELLA    | TELHY-----LSYATNLLLEMTTKSS                                  | 2565        |
| SPONGE       | TETQY-----LYHATNLLLELTSRSP                                  | 2600        |
| OYSTER       | TEKQF-----LSYATNVLLEMTSKSP                                  | 2562        |
| SNAIL        | SECNY-----LSYATNLLLEMTSKSP                                  | 2562        |
| TRICHOPLAX   | AESFY-----LSYSTNLLLELTSRSP                                  | 2559        |
| SEA_ANEMONE  | TEQQY-----LSYTTNVLHLTSFSP                                   | 2571        |
| PRIAPULA     | TEPHF-----LSYATYLLLQLTSLSP                                  | 2608        |
| ESHARK       | IETQY-----LSIATNLLLEMTSRSP                                  | 2581        |
| STERLET      | IEAHY-----LSLATNLLLEMTSRSP                                  | 2594        |
| COELACANTH   | IETQY-----LSLATNMLLEMTSRSP                                  | 2582        |
| <b>HUMAN</b> | <b>IEVHF-----LSLATNFLEMTSMSP</b>                            | <b>2570</b> |
| CAECILIAN    | IESHY-----LSLATNFLEMTSKSP                                   | 2584        |
| PLATYPUS     | IEMHY-----LSLVTNFLEMTSKSP                                   | 2574        |
| CANARY       | IETHY-----LSLITNFLEMTSKSP                                   | 2573        |
| OSTRICH      | IETQY-----LSLITNFLEMTSKSP                                   | 2543        |
| TURTLE       | IETQY-----LSLATNFLEMTSKSP                                   | 2582        |
| ALLIGATOR    | TETQY-----LSLATNFLEMTSKSP                                   | 2540        |
| SOFTCORAL    | TESEY-----LSYTTNLLLHLTSQSP                                  | 2582        |
| STONYCORAL   | TEIQY-----LSYTTNLLHLTSLSP                                   | 2609        |
| ACORN_WORM   | AENQF-----LSYATSLLLEMTSKSP                                  | 2607        |
| LANCELET     | TEPQY-----LSYCTNLLLEMTSRSP                                  | 2606        |
| SEA_URCHIN   | TENRY-----LGYATNLLLEMTSKSP                                  | 2603        |
| STARFISH     | TEHQY-----LSYASSLLLEMTSKSP                                  | 2617        |

\* : \* : : \* :

M-HEAT/CIRCULAR CRADLE

Supplementary Figure 2: CLUSTAL OMEGA DNA-PKcs METAZOA VERTEBRATE INVERTEBRATE

|             |                                                               |      |
|-------------|---------------------------------------------------------------|------|
| TERMITE     | DYNQKIFKEPLQKCFEDFR-MLLSWRAQNATV-APMFADLASQLIQTQSL-----       | 2572 |
| SHRIMP      | DYQRNIFDQPLTECKFREM-KVSTAWRARHASM-IPMFAEQASNDTSLNLSLSYT--QG   | 2593 |
| SCORPION    | DYNLKIIFQNPLSTCAFQNYA-ISSSWKKRHATL-TPWFVDSLSSAASFSDTS-----    | 2625 |
| ALVINELLA   | DYKRPIFEHPLSDCKFKDFH-VRQSWRQRHSTM-TPMFVDQSTQTSSDGSS-----      | 2568 |
| CAPITELLA   | DFNRVLFDTPLSECKFQDFA-VSSTWYQRHAAM-TPMFLDTQSSQSNDS-----        | 2612 |
| SPONGE      | DYNRVLFDTPLESECKFEDYKEIDLSWQQRHLQM-TPLFAATQLSQTQSDTG-----     | 2650 |
| OYSTER      | DYQREMFESPLEDCFKQDYN-VKSSWKQRHAAM-TPLFANMATQSMDDDD-----       | 2611 |
| SNAIL       | DYDRQIFEHPLSECTFRDYS-VQSSWRQRHAVM-TPLFAVQGGSETMEDVE-----      | 2611 |
| TRICHOPLAX  | DYKLSIFDHPLESECKFHQDYN-VNYSWQYRHAMM-TPLFAATQLGSGQSMASF-----   | 2609 |
| SEA_ANEMONE | DFERLMFEQPLSECKFEEYP-IDYSWQQRHVVM-TPLFAATQGGSTQSHSQ-----      | 2619 |
| PRIAPULA    | DYKELVFTQPLSDCKFQDYN-IATSWQSRHAAL-TPLFTEQASQASSTQQT-----      | 2658 |
| ESHARK      | DYTREMFEEYPLSECKFQDYN-IDSSWQQRSTIL-TPMFVEQATQNSSRSQS-----QE   | 2633 |
| STERLET     | DYTRDMFEYPLSDCKFQDYI-IDSNWRHRSTVL-TPMFVEQVTQGGTQYHT-----QD    | 2646 |
| COELACANTH  | DYTRIFEHPLSECKFQDYI-IDSNWRHRSTVL-TPMFVEQASQSTARFRS-----QD     | 2634 |
| HUMAN       | DYPNMFHEHPLSECFQEYI-IDSDWRFRSTVL-TPMFVEQASQGLQTRT-----QE      | 2622 |
| CAECILIAN   | DYTREMFHALSECKFQDYI-IDSNWRHRSTVL-TPMFVEQASLSASRYRS-----QE     | 2636 |
| PLATYPUS    | DYSRHFHEHPLSECKFQEYI-IDSNWRFRSTVL-TPMFVEQASQSALRSRS-----QE    | 2626 |
| CANARY      | DYSRKFHEHPLSECKFQDFV-VDSWRYRSTVL-TPMFVEQASPSSTRNLS-----QE     | 2625 |
| OSTRICH     | DYSRKFHEHPLSECKFQDFV-IDSSWRYRSTVL-TPLFVEQASQSTNRSLL-----QE    | 2595 |
| TURTLE      | DYSRKFHEHPLSECKFQDFI-IDSNWRHRSTVL-TPMFVEQATQSAKRNRS-----QE    | 2634 |
| ALLIGATOR   | DYSRKFHEHPLSECKFQDFI-IDSNWRHRSTVL-TPMFVEQASQSASRKR-----QE     | 2592 |
| SOFTCORAL   | DFGRLLFEQPLSECKFQDYE-INFAWQQRHSTM-TPLFVSLMPSGSSQSS-----F      | 2632 |
| STONYCORAL  | DYERLMFEQPLSECKFEEYQ-IDYSWQQRHLAM-TPLFAATQGGSHGSGMTPT-----Q-- | 2660 |
| ACORN_WORM  | DYKREIFEHALSECKFEDYQ-IDHSWKQRHAALISTPMFVEQSTQIGSDSQ-----      | 2657 |
| LANCELET    | DFSREIFQHPLSECKFQDVQ-IDHSWKQRHVAM-TPMFVEQSSHPASSQSQ-----QS    | 2659 |
| SEA_URCHIN  | DFKREIFEHPLSACKFEGVQ-IDHSWKQRHAALISTPKFVEQVGGQSGSI-RGSPSSQSM  | 2661 |
| STARFISH    | DYKREIFEHPLSECKFQDVT-IDHSWKQRHLAISTPMFVEQSSQASSGSGSQSPDPS--   | 2674 |

ABCDE Loop starts 2577

T2609

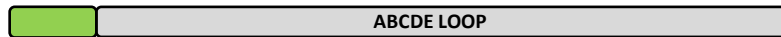

|             |                                                                 |      |
|-------------|-----------------------------------------------------------------|------|
| TERMITE     | SGTGEHTGAGPLLRAT-QASLAFQPTIE----QS-----GS-SIGSL-----            | 2608 |
| SHRIMP      | SDTNMETHDGPAGVQAT--QANVFSAFOA-----PGATYNWVTDSTFDTTLADMEYEATH    | 2645 |
| SCORPION    | -----VKNIDEQIRST--VDVREFDPTQD---QASKKAFNWLTTQT-SIDTLGDWGS---    | 2670 |
| ALVINELLA   | ---DGGSTSPIQLRAT--QDVQFQFATQGG---VGTSKGPYDWTQTS-SIDTFADSD---    | 2615 |
| CAPITELLA   | ---PDAGLSTGQLRAT--QDAAQFTQFOA---DGSSKGPYNWLTQTS-SLDTFSDSQN---   | 2660 |
| SPONGE      | -----SIGTGLRATVQQLSALFTPTQ-----QESSYNWMTPSAQSS--VDYSV----       | 2691 |
| OYSTER      | -----ESYSGEIRAT--QDAQQFTATLD---ASKAPFNWLTGTS-SLDTFDYST---       | 2654 |
| SNAIL       | -----DSLGGVVRAT--VDVEQFTATME---TGSNAPFNWLTQTS-SLDTFADASL---     | 2655 |
| TRICHOPLAX  | SLSGSSSTDEHLRATQSTNLQFTPTQD-----TDARNWLDPSVVDKSIQSYAAFLQQ       | 2662 |
| SEA_ANEMONE | --GGSL--EPGALRAT--QLRVEFSPMD-----QSLSQAFDWNLPSSQADSQSFQTV---    | 2666 |
| PRIAPULA    | ---VAAAMQTGEIRAT--QVVPEFTATQD---VAGGRSTYNWLTQSSSIDTFADQSL---    | 2707 |
| ESHARK      | GSLTAQGTIGGLVRGT--QTHYFPTPTQD---PDAR-NFNWLTGN-SLDTFAEYSL---     | 2682 |
| STERLET     | ---SPQGTIGGQVRAT--QAQLEFQFOA---AGRSSFNWLTGGS-SIDTLSEYSL---      | 2693 |
| COELACANTH  | GPEQVQSGSLGGQVRAT--QVQFDFPTPTQD---TGIRSSFNWLTGTS-SVDTFAEYSL---  | 2684 |
| HUMAN       | GSLSARWPVAGQIRAT--QQQHFQFTLQTT---ADGRSSFDWLTGTS--STDPLVDHTS---- | 2672 |
| CAECILIAN   | GSFPAQSSSLGGQVRAT--QQQYFPTPTQD---IGGRNSFNWLTGN-SIDTLAEYGV---    | 2686 |
| PLATYPUS    | GLLPQGGLLLGQLRAT--QQYFPTPTQD---TDGRNSFNWLTGTS-SVDTFDYPG---      | 2675 |
| CANARY      | RSLSPSGSVRGQVRAT--QRQYFPTPTQD---GSRSSFNWLTGTS-SIDTLAEYAV---     | 2675 |
| OSTRICH     | RSPSTSGSGGGRVVRV--QQQYFPTPTQD---ISGRSSFNWLTGN-SIDTLAEYMV---     | 2645 |
| TURTLE      | GSLSTQGSLLGGQVRAT--QQQYFPTPTQD---VNGRSSFNWLTGTS-SIDTLAEYTV---   | 2684 |
| ALLIGATOR   | GSLSTPQSGQAQVRAT--QQQYFPTPTQD---MSGRKSFNWLTGTS-SIDTLTEYTV---    | 2642 |
| SOFTCORAL   | GSHSMDITDGGQLRAT--QNP-QFSMTQTAGATGPTAQTYDWNLPS-SLDTSQSS--S---   | 2684 |
| STONYCORAL  | --ESMSVDGSPGLRAT--QNL-QFPTQD---QRRSTAFDWNLPT-QESNLQPSQS---      | 2707 |
| ACORN_WORM  | ---SFIETIGNQVRAT--QDV-QFSATQ---EVDGKKTAYNWLTTG--SQDTFSEF--S---  | 2702 |
| LANCELET    | LSQGGQDTLGGQLRAT--QDVLQFQFATQ---ASAAPKNAYNWLTTG-SLDTFADY--S---  | 2709 |
| SEA_URCHIN  | TSSGMSMGGGQLRAT--QATQNFTATQ---DNAASSHKNGYNWLTTG--SQDTFADY--S--- | 2712 |
| STARFISH    | -----SLSRGEIRAT--QDAHQFIATQQLDAVASRKNAYNWLTTG--SQDTFADY--S---   | 2720 |

T2638

T2647

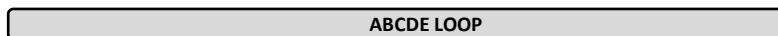

Supplementary Figure 2: CLUSTAL OMEGA DNA-PKcs METAZOA VERTEBRATE INVERTEBRATE

|             |                                                              |      |
|-------------|--------------------------------------------------------------|------|
| TERMITE     | -PSF-----SLSSLLFTTGSFFENQRK-----SYKMGPFGSSKLPPIPEVSDE        | 2652 |
| SHRIMP      | AP-----TQGSTSGLIFNVGASGQKDRRRF-----KRPGLGNSRMRPADE-PDG       | 2688 |
| SCORPION    | -----SSTSSLLFTIGSDTKKIPN-----IDENNRN-----SNQ                 | 2700 |
| ALVINELLA   | -VNMS----TETQSSLLFTIGATSSKSAPSHRQR---VQQRPGPRFGKHSLQQGKA-GNR | 2666 |
| CAPITELLA   | -LTLA----TQSESSLMFTVGSSRIKS-----SKKTPGSEFGQRKVRSDVR-VS-      | 2703 |
| SPONGE      | -PSFTVGATPTSDSSLLFTRPTMRPPL-----KNPL-----RISAERLGKV---GES    | 2734 |
| OYSTER      | ----V---GSETSSLLFTVGTQDMALRTGLK-----PKRKPDPGFGFRPR-----A-GAS | 2696 |
| SNAIL       | ----M---ETNSLSSLLFTVGSSSKGADSKTRVATRHHTGTGSNFGQMARTERT-GNS   | 2707 |
| TRICHOPLAX  | SLSST---SSETSSLLFLSKSPRQ----RPL---QMKPLSKDFGQQKLSSETA-SQP    | 2710 |
| SEA_ANEMONE | ----G---SSEAQSLLF--GTKPRA----SQR---SLKPVPHDFGSRRLAPTQS-DSQ   | 2708 |
| PRIAPULA    | ---SSVS---SISSSSSSPYSSPSADHH-----ETPTE-AKRRGAT---GEE         | 2745 |
| ESHARK      | -PSLA---SEPGSSLLVFSRWSERL----HRP---AKKPVGPDFGKKRLALP---GDE   | 2727 |
| STERLET     | -PSSA---DSVSSLLVFGKRGDKS----QQA---ARKPVGSDFGKKRLGLP---GDE    | 2737 |
| COELACANTH  | -PSSS---ESLASSLLAYGKRSEKS----QRA---AMKPVGPDFGKKRLALP---GDE   | 2728 |
| HUMAN       | -PSS-----DSSLFAHRRSERL-----QRA---PLKSVGPDFGKKRLGLP---GDE     | 2711 |
| CAECILIAN   | -PSSS---ESLSSLLFASKKSEKS----RRT---SLKPLGPNFGKKRLGLP---GDE    | 2730 |
| PLATYPUS    | -PTSS---ESLST-LLFTHKSSRT-----QKA---GFKPLGPNFGKKRVGLP---GDE   | 2718 |
| CANARY      | -PSSS---ESLSSMLLVSKRSEKF-----KQA---TFKPVGPDFGKKRLGLP---GDE   | 2719 |
| OSTRICH     | -PSFS---ESLSSMLLVSKRSEKF-----KQS---AFKPVGPDFGKKRLGLP---GDE   | 2689 |
| TURTLE      | -PSSS---ESLSSMLFVSKRSEKS----QRA---TLKPLGPNFGKKRLGLP---GDE    | 2728 |
| ALLIGATOR   | -PSSS---ESLSSMLFVNKRSEKS----QRG---TLKPVGPNFGKKRLGLP---GDE    | 2686 |
| SOFTCORAL   | -ASFS---VGSQPSSLLFKSNPNMRRF-----K---TLRPQSEQPST-----SSA-AQS  | 2725 |
| STONYCORAL  | -FAMA---STQTQSLLLFSTSQSHKRR-----K---MLKPVGDFGSKLSQASS-SRI    | 2753 |
| ACORN_WORM  | -SSTG---TETSQSSLLFTITGTTKKA-----I---TRKPVSSGFGKDKMGAG---KDQ  | 2746 |
| LANCELET    | -VPLG---TE-TQSSLLFTDASKKAKARR-----LKPVGPGFGSDRLSAG---RDQ     | 2754 |
| SEA_URCHIN  | -SSSS---A-SESSLLFTMGSLPKRTAQGFRGV---K---QDAGAGGSRD-----      | 2751 |
| STARFISH    | -TSSA---S-DQSSLLFTLGASKKM-GRGRQGV---SKTATDAGFGKEKQLQSDQP-RGR | 2769 |

ABCDE LOOP

|             |                                                                                                  |      |
|-------------|--------------------------------------------------------------------------------------------------|------|
| TERMITE     | VDS-----RSDRLAPN <b>LHRRFL</b> RDDQ--KRIFHASREIQRSARQ <b>QLEQ</b> ERGRLEA                        | 2703 |
| SHRIMP      | NDA-----ADTMQSKL <b>IRRRFV</b> KNDREKQSIYFAKIEERRSKLRE <b>KL</b> EKERKFRREA                      | 2741 |
| SCORPION    | DTSK-NKIEKLSSSNTF <b>LRRRFL</b> KDREK--SRLHFIRMEMRKQQLR <b>QERE</b> KEQKQREG                     | 2757 |
| ALVINELLA   | NDS-----DDGLEIL <b>QLKRRFI</b> KDSDG--RSAYFARREARQ <b>RAIREI</b> AQEQRQRREN                      | 2717 |
| CAPITELLA   | AMD-----EANKEIMR <b>LKRRFI</b> HDQES--TARF <b>FM</b> KNRNVRM <b>KKMRE</b> DIQREQMKREH            | 2754 |
| SPONGE      | EG---GETKKEKRKQVL <b>QLKRRAL</b> KDKEM--VSSFAMNEARK <b>MMREEL</b> KKQRRARQS                      | 2789 |
| OYSTER      | SKPAERSRNEDQDSEMYR <b>LKRRFL</b> DDEEQ--TKTY <b>F</b> IKRHRTRLE <b>KMRE</b> ALREQKSRRRH          | 2754 |
| SNAIL       | AGPK-NDNNTPDENVW <b>LRRRFL</b> KDRST--ASKY <b>F</b> ARREI <b>KEKSKRE</b> ERLQQRRLRREN            | 2764 |
| TRICHOPLAX  | -QS--QSVS-QPSSSN <b>LHRRRYI</b> KSEMA--NNA <b>F</b> YAKRER <b>RKKQLREI</b> LKQOKIAREN            | 2764 |
| SEA_ANEMONE | -QAT-PAMG-SQQQEILR <b>LKRRFT</b> KDSQT-KDRQ <b>F</b> IRMHEK <b>RQMLQ</b> QTQSRLKAARES            | 2764 |
| PRIAPULA    | PREE-ASAA-GGGDDVMR <b>LRRRFL</b> KDQEQ--TRV <b>F</b> ARREARR <b>KQRRE</b> EAETLSRQRREG           | 2801 |
| ESHARK      | VDSK-TKGIVDQRADILR <b>LRRRFL</b> KDREK--VSLI <b>F</b> AKRGIREQ <b>RAEQKI</b> TEKRMERDA           | 2784 |
| STERLET     | VDSR-TKVK-DQRADILR <b>LRRRFL</b> KDQEK--VSLI <b>Y</b> AKKGVRE <b>QKQAKEN</b> VAEQKLKREA          | 2793 |
| COELACANTH  | VDSR-TKVA-DQRDLILR <b>LRRRFL</b> KDQEK--VSLI <b>Y</b> ARKGV <b>IQKEEQ</b> KMAELKMKQDA            | 2784 |
| HUMAN       | VDNK-VKGA-AGRTDLLR <b>LRRRFMR</b> DQEK--LSLM <b>Y</b> ARKGV <b>AEQKREKEI</b> KSELKMKQDA          | 2767 |
| CAECILIAN   | VDSK-AKGI-DDRSDILR <b>LRRRFL</b> KDQEQ--ISKI <b>F</b> V <b>RKGV</b> AEQ <b>KREKEI</b> TAERKMKRDS | 2786 |
| PLATYPUS    | VDSK-TKGI-EERTEILR <b>LRRRFL</b> KDQEK--LSLI <b>F</b> AKKGV <b>VEQKREKEI</b> KSELKMKHDA          | 2774 |
| CANARY      | VDSK-TKGI-EERAEILR <b>LRRRFL</b> KDQDK--LSLI <b>Y</b> ARKSLAE <b>QKREKEI</b> KSELKMKYDA          | 2775 |
| OSTRICH     | VDSK-IKGI-DERAEIL <b>LRRRFL</b> KDQEK--LSLI <b>Y</b> ARKGV <b>AEQKREKEI</b> KSELKMKHDG           | 2745 |
| TURTLE      | VDSK-AKGI-DERAEILR <b>LRRRFL</b> KDQEK--LSLI <b>Y</b> ARKGV <b>AEQKREKEI</b> KSELKMKHDA          | 2784 |
| ALLIGATOR   | VDST-TKDI-NERAEILR <b>LRRRFL</b> KDQEK--LSVI <b>Y</b> ARKGV <b>AEQKREKEI</b> KTELTMKRDA          | 2742 |
| SOFTCORAL   | DDPS-NENS-SQLQNIR <b>LKRRFV</b> KDRKE--TDV <b>F</b> AKKEIAR <b>QKLRT</b> ESVQRQKVAREN            | 2781 |
| STONYCORAL  | SSHQ-SQDP-NEKKEIL <b>LKRRFL</b> KDQSQ--ISAF <b>F</b> AKQAL <b>KRNKFR</b> EQALQRQKAAREG           | 2809 |
| ACORN_WORM  | TDST-EDTS-QTDREIMR <b>LKRRFL</b> KDQEA--SRAF <b>F</b> ARREIR <b>LKKMRE</b> EAQKEQKLRRHN          | 2802 |
| LANCELET    | TDGR-AAED-SQQSEIMR <b>LKRRFL</b> KDQDV--TKAY <b>H</b> ARRQ <b>IRMQKMR</b> ERVKEQRAKRG            | 2810 |
| SEA_URCHIN  | KEAR-KAPS-EGEKEV <b>QRLKRRFM</b> KDQSS--QSA <b>F</b> AKRAT <b>RQKELRE</b> VQKSQRERRFA            | 2807 |
| STARFISH    | DEVD-AQQS-GEDKKINR <b>LKRRFL</b> KDHSS--SQAY <b>F</b> ARRE <b>MKRKQLKEKI</b> LEEQRERKFS          | 2825 |

:::\*

ABCDE LOOP

Supplementary Figure 2: CLUSTAL OMEGA DNA-PKcs METAZOA VERTEBRATE INVERTEBRATE

|              |                                                                                                                                                                                      |             |
|--------------|--------------------------------------------------------------------------------------------------------------------------------------------------------------------------------------|-------------|
| TERMITE      | NIASFREYRS <sup>G</sup> DFPDI <sup>E</sup> ISYSAI <sup>I</sup> KPMQ <sup>E</sup> LAKRDAAVARHLFVLLFDGLLGELYD-----                                                                     | 2758        |
| SHRIMP       | QVTMYRQYRVG <sup>E</sup> LDPDVQ <sup>I</sup> IPHRALIGPLQ <sup>A</sup> LSQRDEKVARLLFEVLAQGVINSAGTAMHHR                                                                                | 2801        |
| SCORPION     | QVTIYRQYRIG <sup>D</sup> LDPDIEINYS <sup>S</sup> IIVPLQ <sup>A</sup> LQHDDDEICRMLFQSLILSVCCYMKS <sup>N</sup> Q-VT                                                                    | 2816        |
| ALVINELLA    | QVILYRKYRIG <sup>D</sup> LDPDIQ <sup>I</sup> EYFNIIAPLQ <sup>A</sup> LAKD <sup>S</sup> SRMAMLLSTLFEAIIHAELVTV--CA                                                                    | 2775        |
| CAPITELLA    | QVTMYRQYRTG <sup>D</sup> DFPDIQ <sup>I</sup> KYSFLIAPLQ <sup>A</sup> LQRDSTIAKLLFVAVFQAIFTQIESEKTER                                                                                  | 2814        |
| SPONGE       | YVVMYRKYRMG <sup>E</sup> LDPDIQ <sup>I</sup> KHSELIRPLQ <sup>A</sup> LQND <sup>S</sup> GLARLLFCSLFNSIFSQLDHLLTEE                                                                     | 2849        |
| OYSTER       | QVTMYRKYRK <sup>G</sup> DLPDIQ <sup>I</sup> KYSYIIAPLQ <sup>A</sup> VAHRD <sup>S</sup> SVAKLLFGAIFKGFISKMDEVKTER                                                                     | 2814        |
| SNAIL        | QVTLRYR <sup>R</sup> YRIG <sup>D</sup> LDPDIQ <sup>I</sup> KYSYIIAPLQ <sup>A</sup> LHRD <sup>N</sup> TIAKLLFGAVFKAIYQEMDKVKTDQ                                                       | 2824        |
| TRICHOPLAX   | KVVMYRKYRD <sup>G</sup> E <sup>L</sup> DPDIQ <sup>I</sup> KHSELIAPFQ <sup>A</sup> LQV <sup>C</sup> YLDQNYRY---VNLSVNDLVENFNDE                                                        | 2821        |
| SEA_ANEMONE  | QVVMYRKYRAG <sup>D</sup> LDPDVQ <sup>I</sup> KHSELIAPLQ <sup>A</sup> VAQC <sup>D</sup> STLAKQLFSVLVQAILSQMDEKLTEQ                                                                    | 2824        |
| PRIAPULA     | QVXMYRKYRIG <sup>D</sup> XPDVQ <sup>I</sup> QFCHLISPLQ <sup>A</sup> LQRDARVAQLLFS <sup>S</sup> SLCDGVVRRAGDTATER                                                                     | 2861        |
| ESHARK       | KVTLYRSYRF <sup>G</sup> DLPDIQ <sup>I</sup> KYS <sup>S</sup> LIAPLQ <sup>A</sup> LAKD <sup>H</sup> SLAKQLFSALFSGILEEVHKS <sup>K</sup> TA-                                            | 2843        |
| STERLET      | QVTLYRSYRQ <sup>G</sup> DLPDIQ <sup>I</sup> QHSSLIAPLQ <sup>A</sup> LQRD <sup>P</sup> TLAKQLFSS <sup>L</sup> FSGIL <sup>E</sup> MEK <sup>S</sup> KS <sup>S</sup> QS                  | 2853        |
| COELACANTH   | QVTLYR <sup>R</sup> YRQ <sup>G</sup> DLPDIQ <sup>I</sup> HYSSLIAPLQ <sup>A</sup> LQRD <sup>P</sup> TLAKQLFS <sup>N</sup> LFTGIL <sup>E</sup> MEK <sup>S</sup> RS <sup>S</sup> DS     | 2844        |
| <b>HUMAN</b> | <b>QVVL<sup>Y</sup>RSYRH<sup>G</sup>DLPDIQ<sup>I</sup>KHSS<sup>L</sup>LITPLQ<sup>A</sup>VAQRD<sup>P</sup>IIAKQLFSS<sup>L</sup>FSGIL<sup>E</sup>KEM<sup>D</sup>KFK<sup>T</sup>LS</b>  | <b>2827</b> |
| CAECILIAN    | EVTLYRSYRH <sup>G</sup> DLPDIQ <sup>I</sup> AIY <sup>S</sup> NLIAPLQ <sup>A</sup> VAQRD <sup>P</sup> TLAKQLFSS <sup>L</sup> FFGIMKEMDK <sup>L</sup> KSS <sup>S</sup>                 | 2846        |
| PLATYPUS     | QITLYRSYRQ <sup>G</sup> DLPDIQ <sup>I</sup> EHSS <sup>L</sup> LITPLQ <sup>A</sup> VAQRD <sup>P</sup> TLAKQLFSS <sup>L</sup> FAGILKEIDK <sup>F</sup> KS <sup>S</sup> QS               | 2834        |
| CANARY       | QVTLYRSYRVG <sup>D</sup> LDPDIQ <sup>I</sup> EYCSLIAPLQ <sup>A</sup> LQK <sup>D</sup> PTFAKQLFSS <sup>L</sup> FSGIFHEV <sup>K</sup> KS <sup>K</sup> HPS                              | 2835        |
| OSTRICH      | QVILYRSYRVG <sup>D</sup> LDPDIQ <sup>I</sup> EYSSLIAPLQ <sup>A</sup> GLAQK <sup>D</sup> ATFAKQLFSS <sup>L</sup> FTGILREVEK <sup>S</sup> KT <sup>P</sup> S                            | 2805        |
| TURTLE       | QVTLYRSYRQ <sup>G</sup> DLPDIQ <sup>I</sup> EYSS <sup>L</sup> LITPLQ <sup>A</sup> GV <sup>A</sup> QRD <sup>P</sup> PLAKQLFSS <sup>L</sup> FTGILKEMN <sup>K</sup> FN <sup>P</sup> S   | 2844        |
| ALLIGATOR    | QVTLYRSYRQ <sup>G</sup> DLPDIQ <sup>I</sup> EYSS <sup>L</sup> LITPLQ <sup>A</sup> GV <sup>A</sup> QRD <sup>P</sup> TLAKQLFSS <sup>L</sup> FTGILKEMEN <sup>S</sup> KS <sup>S</sup> PL | 2802        |
| SOFTCORAL    | KVVMYRKYREG <sup>D</sup> LDPDIQ <sup>I</sup> KHSD <sup>L</sup> LITPLQ <sup>A</sup> LQC <sup>D</sup> SYIAKQLFSGIFRGIFSQIDENVTDT                                                       | 2841        |
| STONYCORAL   | AIVMYRKYRS <sup>G</sup> DLPDIQ <sup>I</sup> KYSELIAPLQ <sup>A</sup> LQCD <sup>N</sup> TFAKQLFSALFRGIFSKIDEK <sup>L</sup> PER                                                         | 2869        |
| ACORN_WORM   | MVTLYRSYRQ <sup>G</sup> DLPDIQ <sup>I</sup> KHMY <sup>L</sup> IAPLQ <sup>A</sup> LQRD <sup>T</sup> AIARQLFSS <sup>L</sup> FCGVFAQIAE <sup>E</sup> KTER                               | 2862        |
| LANCELET     | LVTLYRQYRVG <sup>D</sup> LDPDIQ <sup>I</sup> KYSYIIAPLQ <sup>A</sup> LQRD <sup>S</sup> MLARLLFSS <sup>L</sup> FRGIFEEIENV <sup>K</sup> TER                                           | 2870        |
| SEA_URCHIN   | QVTMYRQYRTG <sup>D</sup> LDPDIQ <sup>I</sup> KHSD <sup>I</sup> IAPLQ <sup>A</sup> LALR <sup>D</sup> STLSRLLFSALFRGILARIGDMCTDG                                                       | 2867        |
| STARFISH     | TVTMYR <sup>R</sup> YRTG <sup>D</sup> LDPDIQ <sup>I</sup> KYSD <sup>L</sup> IAPLQ <sup>A</sup> LQRD <sup>A</sup> SLARLLFSS <sup>L</sup> FRGIFSEIEEV <sup>K</sup> TER                 | 2885        |

FAT begins 2801

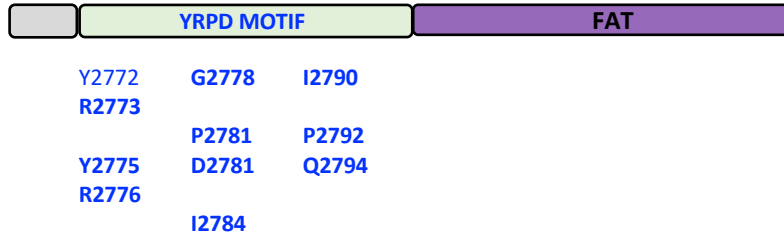



Supplementary Figure 2: CLUSTAL OMEGA DNA-PKcs METAZOA VERTEBRATE INVERTEBRATE

|              |                                                                    |             |
|--------------|--------------------------------------------------------------------|-------------|
| TERMITE      | EKEVYTKQVKAMGSIVSTTKDYTTMVMGAVMEIALCHSRYITLQAEDITTVSRFSGLLA        | 2818        |
| SHRIMP       | EEQEWNQELHEALNGILSSSYMCCPQMLRVTVLHLMINN--DVRTNPESLTAACLGSRLEA      | 2859        |
| SCORPION     | EYSEFCRSLSSALNEILKKSVMHYHPQLVAFCECLNCDVKEMDIDYEQICTASQASHKQS       | 2876        |
| ALVINELLA    | DNRSIHARISNSLNTMLSTTNQYYAPFINCILHMAYSNIHNLTLSPNISSACLTLGLQQP       | 2835        |
| CAPITELLA    | ESQSLVAKIESSLNKILETSYQYFSPFICGVLEIAYLFPKQLKLPQGVVSTVCNMSDQQP       | 2874        |
| SPONGE       | DAAAATKGVIEGININTILDCTSYQYFSPFICGLDICYEN--SLKIKPPSITSSSLASKQEF     | 2908        |
| OYSTER       | EVQETIQQIQKSIQVVLTTSTYQYFSPFICGLDVLVYSLRSKLVSDVSSAAMFQNIQP         | 2874        |
| SNAIL        | EMEETKEKISDSLGRMLSTS IHYFTPFMGCVMDILHTLRSSLKVEVSELSIAAKISNLQP      | 2884        |
| TRICHOPLAX   | DAAEKAEIKASLSNIVKKS KHYFPPFIACVQDICYQK--ELSIQSSFASVASLASSQQP       | 2880        |
| SEA_ANEMONE  | DAEKTVTDIQGALDNIMTSSYQYFSPFISCIEDICYHKS--MLKVQPSVSTASLASLQQP       | 2883        |
| PRIAPULA     | DVDATMEKLESAVSVMASSSTSYFSPFICGLDVCYRNISILRLDPAVVTTVSQTSMQQN        | 2921        |
| ESHARK       | ETKDISKQLVENFNYLLKATTLNFPPFVACIQDMSQHKDLLGLDSTSVRSTSLASLQQP        | 2903        |
| STERLET      | EKKRITTEEILGDMNFLSKTQYFSPFVTCVQDMSYRHKELLNIEPSSVSSCLASLQQP         | 2913        |
| COELACANTH   | ERKTILLELLGNFNGFLSNTVYFSPFVTCIQDMSYQHAELNLDPASVSASCLASLQQP         | 2904        |
| <b>HUMAN</b> | <b>EKNNTIQKLLQDFNRLNTTFSSFFPFVSCIQDISCQHAALLSLDPAAVSAGCLASLQQP</b> | <b>2887</b> |
| CAECILIAN    | EMKDITQKLLADFNRLNITTSYFPPFVACIQDMSYHHTTELLNLDPSNVSTCLASLQQP        | 2906        |
| PLATYPUS     | EKRNTITLKLQDFNHFLLSSTVSSFFPFISCIQEMSFOHTELLNLDANCVSTCLASLQQP       | 2894        |
| CANARY       | EKNAIQKLLNDFNFLSMSLSYFPPFIACIQEMS YQHRELLDSANVSTCLASLQQP           | 2895        |
| OSTRICH      | EKKIIIQKLLKDFNQFLSMSYFPPFIACIQEMS YQHRELLDLSANVSTCLASLQQP          | 2865        |
| TURTLE       | EKNCITQELLQNFNRLSMTVSYFPPFIACIQEMS YQHRELLDLSATVSTCLASLQQP         | 2904        |
| ALLIGATOR    | EKTHIVQKLLQNFNDFLSISVSYFPPFIACIQEMS YQHKELLDIDSTSVSTCLASLQQP       | 2862        |
| SOFTCORAL    | QADEIFRDIQDALNNMITSSYQYFPPFIACIQEMSVNVCYNEG--KLSLEAGKVTASIGSLQQP   | 2900        |
| STONYCORAL   | EAAVTSDLRSAMNHMLSSSTQFPPFIISSIQDICFHECKLRSVDSASVSTACLTSLQQP        | 2929        |
| ACORN_WORM   | ESEEIKKINEHLNSMLSNTSYQYFSPFICGLEDIAYHNCKELMLDAQGISASLISQQQP        | 2922        |
| LANCELET     | EAEADLTEQISRFLNTALSNSKEYFPPFISSIQEMICYREPRKLPSPDASVIQQTGVISLQQP    | 2930        |
| SEA_URCHIN   | ETELHVKGIERHLNQMLTDSNQFDPAFISCMLEIGFYHSEQLTLDPAAISQCLTSRQLL        | 2927        |
| STARFISH     | EAEKSTKVEINRHLNMLSTSYQYFPPFISCVQEMISYHSEQLTLPSTISTASLTSQQMH        | 2945        |
| :            | : . . . : . :                                                      | .           |

**FAT**

|              |                                                                         |             |
|--------------|-------------------------------------------------------------------------|-------------|
| TERMITE      | LGCLSLEELIQKDTVSE--AGSSKRSKTFE---PSTEEILWLSLADLYKHMDEWVVRGI             | 2874        |
| SHRIMP       | LGIIVLERQALLSKRGEPEHPARKKMRKDAEALS--QDDSLWLSIAEMYKNLNMWVVRGV            | 2918        |
| SCORPION     | LGIILLEEDHLLICYNFKS--SNPAKRKIKLNKPLIS--DELSIWLKMAEIKYKLSDYDSVHGI        | 2934        |
| ALVINELLA    | MGIMLLEKMLIHAENP--T-CQPSKK--HRTIGPQVSRDINVWLELAKLYKSGDYDTLGGI           | 2892        |
| CAPITELLA    | LGIILLEEGLLHSPED--Q--SPASKRRRDRSRITQDTEPWLELAKLYKSIDYDVLVGI             | 2932        |
| SPONGE       | TGIMLLEKQLLNVD--S--SKSAKRRTNKSN--EVTETWIELARLYKSLDYDVLHGI               | 2962        |
| OYSTER       | LGIICVLEEQQLISQDE--D--ERPSKRRGRSDNAVVS--TDTLSWIELARLYKSVKEYDVLVGI       | 2930        |
| SNAIL        | LGIIEVLEERLITEDSG--G--ARPSKRSRYDVTPT--KDDMQWIELAKLYKSLGDFDVLHGI         | 2941        |
| TRICHOPLAX   | LGIILLEKQIMHLDT--E--EPPSKRIKT--SSAS--EATSNWIELSKLYKSIDYDVLVGI           | 2934        |
| SEA_ANEMONE  | MGILLLEKQLLSQEA--E--PKSHKRMRTHESSPSS--DTTAAWLELAKLYRSVEEFDVLHGI         | 2939        |
| PRIAPULA     | LGIIVLEKMLMQGACDDE--SRPAKRRMRAGSGMGVSOHTDWTWIELARLYKSLGDYDTLHGI         | 2980        |
| ESHARK       | MGILLLEKSLIHSTTN--E--EPPTKKARGRQELPPDTPDVARWIELATLYRS LGDYDVLVGI        | 2961        |
| STERLET      | MGILLMEESLIKGLVP--E--EPPAKRRARGRRELPPD--TARWIHLAKLYRS LGDYDVLVGI        | 2969        |
| COELACANTH   | MGVLLLEQGLIQLLAA--E--EPPAKRRARGRRELPPD--TIRWLELAKLYRS LGDYDVLVGI        | 2960        |
| <b>HUMAN</b> | <b>VGIRLLEEALLRLLPA--E--L--PAKRVRGKARLPPD--VLRWVELAKLYRS IGEYDVLVGI</b> | <b>2942</b> |
| CAECILIAN    | VGILLLEERSLSLVDVT--E--EPPRKKMRGKTELSPD--VVRWIELAKLYRS LGDYDVLVGI        | 2962        |
| PLATYPUS     | VGILLLEQALIRLGPPE--E--EPSSKKRRGKQLPPD--VVRWIELAKLYRSVGEYDVLVGI          | 2950        |
| CANARY       | MGILLLEERAMALSPA--E--EPPSKRRMRGRTELPPD--VIRWIELAKLYRS LGDYDALVGI        | 2951        |
| OSTRICH      | VGILLLEHALISLSPA--E--EPPSKRVCGRRELPPD--VIRWIELAKLYRS LGDSVVLVGI         | 2921        |
| TURTLE       | VGILLLEQALTRLSSSE--E--EPLSKRRMRGRAALSPD--VIRWIELAKLYRSVGDYDVLVGI        | 2960        |
| ALLIGATOR    | VGILLLEQALIHLSIT--E--EPPAKRMCGRTELSPD--VIRWIELAKLYRSVGDYDVLVGI          | 2918        |
| SOFTCORAL    | TGIMLLEKQILQMAEDPG--ERPRKRRKQTGGNPSP--ESTATWIELSKLYKSVEDFDVLVGI         | 2958        |
| STONYCORAL   | IGIMLLEKQLLEIEGK--S--QNSRKRKAKTSTVPPS--EVTTCWIELSKLYRSVGDYDVLVGI        | 2986        |
| ACORN_WORM   | LGLLLEEYLVQKSGE--E--ERSRKRPRGSASLLS--QEISTWIELSRLYKDLDNFDVLVGI          | 2979        |
| LANCELET     | IGIVLLEEQVLVQKAGV--E--EPRSRRARTSSPVS--AETATWIELARLYKSLGDFDVLVGI         | 2987        |
| SEA_URCHIN   | IGIRVLEEVLIKSGD--D--ERSRKRARTSRPESN--QEMSTWIELARLYKAMGEFDVLVGI          | 2984        |
| STARFISH     | IGIRLLEENLIQKPWQ--E--EKSAKRARFVSREPS--PEISTWIELARLYKALGDFDAVQGV         | 3002        |
| *            | * : * : * : * : * : *                                                   | * : * :     |

**FAT**

Supplementary Figure 2: CLUSTAL OMEGA DNA-PKcs METAZOA VERTEBRATE INVERTEBRATE

|              |                                                                                                                                            |             |
|--------------|--------------------------------------------------------------------------------------------------------------------------------------------|-------------|
| TERMITE      | FHKYLCN-GENVHKALKWE <sup>T</sup> SGHWDKARMEYEAALSSM-----DDQDGLSDYYEALY                                                                     | 2926        |
| SHRIMP       | VQKGLGAIKEETQKAL <sup>E</sup> EATN <sup>N</sup> HVKAFLLYRQSLDTT-DWEE--EPLAAENRLWEEWYS                                                      | 2975        |
| SCORPION     | FSNSLNI-QEETKQAL <sup>E</sup> ESRGEYLLAVKLYSKLYDQT-EWSAE-EPNQAIEDLWDNAIL                                                                   | 2991        |
| ALVINELLA    | FGSKLGT-KEIT <sup>L</sup> EAMEAEMSGDYQTAVQLYKALVCT-DWDE--EPDELEKDFWDASSL                                                                   | 2948        |
| CAPITELLA    | FSSQIGS-KPATRLAL <sup>E</sup> EAETRGDYRSALQLYNESLAKE-EWDDGHEPTEAEINMWSSRI                                                                  | 2990        |
| SPONGE       | FTNLDDT-KDVTRKAL <sup>E</sup> EERGDYLTALNLYKKAIDF--DWPQGESPPQVEEDLWEDSLL                                                                   | 3019        |
| OYSTER       | FSGRIGT-QDIT <sup>K</sup> EAVQMEARGDYKAVKLYNQALSCN-DWDE--NPPTIEVDMWDESRM                                                                   | 2986        |
| SNAIL        | FSGMLKT-KEVTQ <sup>L</sup> ALIEESHSEYKAAIALYNKALESA-DHDP--RPLEAEIDLWDESRM                                                                  | 2997        |
| TRICHOPLAX   | FSGHLGT-KDIT <sup>Q</sup> RAL <sup>E</sup> ESRHDYAAAVKYYNQAMDCS-SWPDG-EPQAEEDLW <sup>E</sup> ISRL                                          | 2991        |
| SEA_ANEMONE  | FSDHIGT-KPIT <sup>R</sup> LAL <sup>E</sup> EARGDYAQA <sup>L</sup> KIYNEAMSCD-DWSS--KPQQEEDLW <sup>D</sup> DARM                             | 2995        |
| PRIAPULA     | FNDKIGT-QTCT <sup>Q</sup> EAL <sup>Q</sup> AESCDYK <sup>L</sup> ARKLYQRALEM--EWGESEGPQGGERDLWDISLM                                         | 3037        |
| ESHARK       | FSEKIGT-KPLTHT <sup>A</sup> L <sup>L</sup> EA <sup>K</sup> SDYAEAVRLYDQALNTE-EWMDG-NPMETEKDFW <sup>E</sup> IAAL                            | 3018        |
| STERLET      | FSGKIGA-KSIT <sup>S</sup> MA <sup>L</sup> QA <sup>E</sup> AKSDYAEAVKLYNEALNTE-EWTDG-EPAAEAKDLW <sup>E</sup> IAAL                           | 3026        |
| COELACANTH   | FSGMIGT-KQIT <sup>Q</sup> KAL <sup>L</sup> EA <sup>K</sup> SDYSEAVRLYDEALNVE-EWPDG-EPTAEKDFW <sup>E</sup> LAAAL                            | 3017        |
| <b>HUMAN</b> | <b>FTSEIGT-KQIT<sup>Q</sup>SAL<sup>L</sup>EA<sup>R</sup>SDYSEAAKQYDEALNKQ-DWVDG-EPTAEKDFW<sup>E</sup>LASL</b>                              | <b>2999</b> |
| CAECILIAN    | FSGKIGT-KPHTKD <sup>A</sup> L <sup>L</sup> EA <sup>K</sup> SDYATAAKLYDEALNMP-DWSND-EPTAEKDFW <sup>E</sup> VAAAL                            | 3019        |
| PLATYPUS     | FSGEIGT-KHVT <sup>Q</sup> I <sup>A</sup> L <sup>L</sup> EA <sup>K</sup> SDYSEAAKQYNEALNMQ-HWEDG-EPSEAEKDFW <sup>E</sup> LAVL               | 3007        |
| CANARY       | FSGIGT-KEIT <sup>Q</sup> KAL <sup>L</sup> EA <sup>R</sup> NDYAEAAQYD <sup>K</sup> ALSQE-DWQDG-EPTAEKDFW <sup>E</sup> LASL                  | 3008        |
| OSTRICH      | FSGKIGT-KEIT <sup>Q</sup> KAL <sup>L</sup> EA <sup>R</sup> SDYATAAKHYDEALSKE-DWQDG-EPTAEKDFW <sup>E</sup> LASL                             | 2978        |
| TURTLE       | FSGKIGT-KEIT <sup>Q</sup> NAL <sup>L</sup> EA <sup>R</sup> SDYAEAAKQYDEALSQK-DWPDG-EPTAEKDFW <sup>E</sup> LASL                             | 3017        |
| ALLIGATOR    | FSGRIGT-KEIT <sup>Q</sup> KAL <sup>L</sup> EA <sup>K</sup> SDYVEAVKQYDEALSQK-DWSDG-EPSEARDFW <sup>E</sup> LASL                             | 2975        |
| SOFTCORAL    | FNSHIGT-QSIT <sup>K</sup> DAL <sup>E</sup> AEGRGDYTEALKLYSQA <sup>T</sup> NCNCD-EWPAGSSPLQAEEDFWD <sup>S</sup> SIL                         | 3016        |
| STONYCORAL   | FTGHIGT-KDIT <sup>R</sup> EAMEA <sup>E</sup> ARGDYSQA <sup>L</sup> KLYNEAIGTDDVWIKE-ELRQEEDLW <sup>D</sup> VSRL                            | 3044        |
| ACORN_WORM   | FSGKVT-QPVT <sup>R</sup> EAL <sup>E</sup> AASANYQAANLYDEALGCT-DWPDG-RPEQVEEDLW <sup>D</sup> DCRL                                           | 3036        |
| LANCELET     | F <sup>S</sup> RKVT-QVT <sup>T</sup> YEA <sup>L</sup> EAEARGDFK <sup>A</sup> VELY <sup>N</sup> QAMQET-EWPDG-QPLAVEEDLW <sup>D</sup> DSRL   | 3044        |
| SEA_URCHIN   | FGALIGT-KDVT <sup>Q</sup> EAT <sup>Q</sup> AESRGDYSEALELYSKAIS-S-DWGPD-GVAREEEDFWD <sup>E</sup> EARL                                       | 3040        |
| STARFISH     | F <sup>S</sup> ACIGT-HEIT <sup>K</sup> TAL <sup>E</sup> A <sup>E</sup> ARGDYSTA <sup>L</sup> KLYNQAFE-M-DWDEG-AVSQVEEDLW <sup>D</sup> ESRL | 3058        |
| .            | . * : * . * *                                                                                                                              | :           |

**FAT**

|              |                                                                                                                                                                                                                                      |             |
|--------------|--------------------------------------------------------------------------------------------------------------------------------------------------------------------------------------------------------------------------------------|-------------|
| TERMITE      | KCLAHLS <sup>D</sup> WKGLNNQVRR-----QVENNL <sup>D</sup> QLW <sup>T</sup> DEWLQEKLLPQIL <sup>L</sup> SEIQMMLDKGV                                                                                                                      | 2980        |
| SHRIMP       | NCAAIL <sup>G</sup> QWSELENFVEKRF <sup>L</sup> QDDG <sup>E</sup> VDLNRVWLLPKPTATAPALV <sup>H</sup> SKLMNILDGSE                                                                                                                       | 3035        |
| SCORPION     | QCYDYL <sup>T</sup> QWDL <sup>L</sup> QLS <sup>I</sup> IN-RIDENQ <sup>K</sup> QPNL <sup>K</sup> IEWEPYQENYLPFL <sup>I</sup> KSKLKLLENR-                                                                                              | 3049        |
| ALVINELLA    | HCYEH <sup>L</sup> TQW <sup>N</sup> KLLECTLT-NLDD-VRSAN <sup>L</sup> DRIWEDTYYQDTYLPYL <sup>I</sup> HSKLKLLENGE                                                                                                                      | 3006        |
| CAPITELLA    | ECAEN <sup>L</sup> TQWR <sup>D</sup> VETLST---SD-LEGS <sup>S</sup> L <sup>A</sup> VWDS <sup>T</sup> YHQEVYLP <sup>P</sup> MLRSKIKLILNGDT                                                                                             | 3045        |
| SPONGE       | NAYSH <sup>L</sup> TKW <sup>D</sup> LEKASTC-NIGE-ETNS <sup>K</sup> LEQLW <sup>K</sup> DSYCQEHYLP <sup>F</sup> VLS <sup>S</sup> KLKLWCTDD-                                                                                            | 3076        |
| OYSTER       | ECLDNL <sup>S</sup> QW <sup>K</sup> LEGVAMS-GIS---SNS <sup>I</sup> SQV <sup>W</sup> KD <sup>T</sup> YQEHYLP <sup>Y</sup> I <sup>R</sup> SKVKLMLQGDG                                                                                  | 3041        |
| SNAIL        | ECLNRL <sup>T</sup> EW <sup>K</sup> LEMVTTD-ALSQ-EGE <sup>I</sup> SLAS <sup>V</sup> WDD <sup>T</sup> YMETYLP <sup>Y</sup> L <sup>I</sup> RSK <sup>L</sup> KLHLHGDE                                                                   | 3055        |
| TRICHOPLAX   | ECLYNL <sup>T</sup> QW <sup>D</sup> KLEYSLV-NVD-NNDPP <sup>S</sup> FDKI <sup>W</sup> EDN <sup>Y</sup> QENYLP <sup>L</sup> FL <sup>K</sup> S <sup>K</sup> AKVMCENDL                                                                   | 3049        |
| SEA_ANEMONE  | QCFAN <sup>L</sup> AKW <sup>G</sup> DLEEYSKT-GVDDEGNPP <sup>D</sup> L <sup>D</sup> KI <sup>W</sup> TD <sup>T</sup> YQEHYLP <sup>F</sup> IM <sup>R</sup> SSI <sup>K</sup> LICEGEE                                                     | 3054        |
| PRIAPULA     | QCLDR <sup>L</sup> TDW <sup>T</sup> ALDAHTKECL <sup>I</sup> PEGS <sup>E</sup> ADL <sup>L</sup> Q <sup>L</sup> LWED <sup>T</sup> Y <sup>E</sup> ENHLP <sup>F</sup> V <sup>M</sup> RA <sup>R</sup> LK <sup>R</sup> LLVEG-              | 3096        |
| ESHARK       | ECYNH <sup>L</sup> TEW <sup>K</sup> AL <sup>E</sup> YCSTV-NIDD-KTPAD <sup>I</sup> ENI <sup>W</sup> SD <sup>T</sup> FYQET <sup>Y</sup> LS <sup>Y</sup> M <sup>I</sup> RS <sup>K</sup> V <sup>K</sup> LLQSGE-                          | 3075        |
| STERLET      | ESYSH <sup>L</sup> TEW <sup>K</sup> SLQ <sup>Y</sup> YCSTV-NIDD-SSPAD <sup>L</sup> EKI <sup>W</sup> GD <sup>P</sup> FYQEA <sup>Y</sup> LP <sup>Y</sup> VM <sup>R</sup> SV <sup>K</sup> LLQLGE-                                       | 3083        |
| COELACANTH   | ECYSH <sup>L</sup> TEW <sup>K</sup> AL <sup>E</sup> YCSTV-NIDD-KTPAD <sup>L</sup> ENI <sup>W</sup> ND <sup>P</sup> FYQET <sup>Y</sup> LP <sup>Y</sup> LM <sup>R</sup> SV <sup>K</sup> LLLLGQ-                                        | 3074        |
| <b>HUMAN</b> | <b>DCYNHLA<sup>E</sup>W<sup>K</sup>SLE<sup>Y</sup>CSTA-SIDS-ENPPDLN<sup>K</sup>IWSE<sup>P</sup>FYQET<sup>Y</sup>LPY<sup>M</sup>IRSKLKL<sup>L</sup>LQGE-</b>                                                                          | <b>3056</b> |
| CAECILIAN    | ECYNRL <sup>T</sup> EW <sup>K</sup> PLE <sup>Y</sup> CSTV-NIDD-SKPAD <sup>L</sup> NKI <sup>W</sup> ND <sup>P</sup> FYQET <sup>Y</sup> LP <sup>Y</sup> M <sup>I</sup> RS <sup>K</sup> V <sup>K</sup> LLLQ <sup>G</sup> K-             | 3076        |
| PLATYPUS     | ECYNH <sup>L</sup> TEW <sup>K</sup> SLE <sup>Y</sup> CSTV-NIDS-ESPP <sup>D</sup> LN <sup>K</sup> IW <sup>N</sup> D <sup>P</sup> FYQET <sup>Y</sup> LP <sup>Y</sup> M <sup>I</sup> RG <sup>K</sup> LKL <sup>L</sup> LQGG-             | 3064        |
| CANARY       | ECYDHL <sup>T</sup> MW <sup>K</sup> SLE <sup>Y</sup> CATV-NIDS-GKPP <sup>D</sup> L <sup>S</sup> KT <sup>W</sup> ND <sup>P</sup> FFQET <sup>Y</sup> LP <sup>Y</sup> I <sup>R</sup> SK <sup>L</sup> KL <sup>L</sup> LSGE-              | 3065        |
| OSTRICH      | ECYDHL <sup>T</sup> EW <sup>K</sup> SLE <sup>Y</sup> CATV-NIDS-GQPP <sup>D</sup> L <sup>N</sup> KT <sup>W</sup> ND <sup>P</sup> YQET <sup>Y</sup> LP <sup>Y</sup> I <sup>R</sup> SK <sup>L</sup> KL <sup>L</sup> LNGE-               | 3035        |
| TURTLE       | ECYNH <sup>L</sup> TEW <sup>K</sup> SLE <sup>Y</sup> CSTV-NIDS-GQPP <sup>D</sup> L <sup>N</sup> KT <sup>W</sup> SD <sup>P</sup> FYQET <sup>Y</sup> LP <sup>Y</sup> I <sup>R</sup> SK <sup>L</sup> KL <sup>L</sup> HHGG-              | 3074        |
| ALLIGATOR    | ECYDHL <sup>T</sup> EW <sup>K</sup> SLE <sup>Y</sup> CSTL-NIDS-EQPAD <sup>L</sup> N <sup>K</sup> T <sup>W</sup> SD <sup>P</sup> FFQET <sup>Y</sup> LP <sup>Y</sup> I <sup>R</sup> SK <sup>L</sup> KL <sup>L</sup> HHGG-              | 3032        |
| SOFTCORAL    | ECCRR <sup>L</sup> TLW <sup>D</sup> KMDHNCIV-NFDEANG <sup>V</sup> L <sup>D</sup> L <sup>Y</sup> WRDD <sup>Y</sup> YKEHYLP <sup>F</sup> L <sup>C</sup> SK <sup>T</sup> KKFCIGD-                                                       | 3074        |
| STONYCORAL   | QCLAD <sup>L</sup> TKW <sup>K</sup> ELEKCSVE-SIDD-KNPP <sup>D</sup> L <sup>D</sup> KV <sup>S</sup> DT <sup>F</sup> YQEHYLP <sup>H</sup> L <sup>I</sup> TS <sup>K</sup> LKL <sup>Q</sup> CQGS-                                        | 3101        |
| ACORN_WORM   | QCYE <sup>Q</sup> L <sup>T</sup> DW <sup>Q</sup> LEQASTI-NIDD-NDPP <sup>D</sup> L <sup>D</sup> KI <sup>W</sup> DD <sup>T</sup> YQEHYLP <sup>V</sup> IV <sup>K</sup> SKLKL <sup>L</sup> MEDDD                                         | 3094        |
| LANCELET     | QCYDHL <sup>T</sup> QW <sup>N</sup> KL <sup>Y</sup> EVSTV-NIDE-DSPP <sup>N</sup> L <sup>D</sup> KM <sup>W</sup> DD <sup>T</sup> FQEHYLP <sup>F</sup> T <sup>I</sup> RS <sup>K</sup> LKL <sup>L</sup> LEGE-                           | 3101        |
| SEA_URCHIN   | QCCN <sup>Q</sup> L <sup>T</sup> KW <sup>D</sup> MESFSTD-QIEG-KGSND <sup>L</sup> SQI <sup>W</sup> ND <sup>D</sup> YQEIYLP <sup>Y</sup> M <sup>R</sup> SK <sup>L</sup> KRLMEGS-                                                       | 3097        |
| STARFISH     | NCCN <sup>Q</sup> L <sup>T</sup> QW <sup>K</sup> ELQ <sup>N</sup> YSTV-NIDD-NSPH <sup>D</sup> L <sup>G</sup> KI <sup>W</sup> SD <sup>T</sup> FYQEL <sup>Y</sup> LPH <sup>M</sup> RS <sup>L</sup> K <sup>L</sup> Q <sup>L</sup> MEGG- | 3115        |
| ..           | * * : . : *                                                                                                                                                                                                                          | : .         |

**FAT**

Supplementary Figure 2: CLUSTAL OMEGA DNA-PKcs METAZOA VERTEBRATE INVERTEBRATE

|              |                                                                                                                                                                                                                                                                            |             |
|--------------|----------------------------------------------------------------------------------------------------------------------------------------------------------------------------------------------------------------------------------------------------------------------------|-------------|
| TERMITE      | DSKRE <b>FL</b> Q <b>Q</b> VDRWLRDRD <b>K</b> SDY <b>L</b> SSHYCE <b>E</b> LAAIFLIQDKLD <b>Q</b> AHQVHSLTMFLDSW                                                                                                                                                            | 3040        |
| SHRIMP       | --TDGN <b>L</b> IA <b>F</b> IDQSMGDHRR <b>R</b> SM <b>L</b> EGD <b>L</b> PL <b>Q</b> LGVLAHQEK <b>F</b> EQ <b>A</b> NVYANTATSM <b>L</b> LL <b>L</b>                                                                                                                        | 3093        |
| SCORPION     | --NDQ <b>S</b> LL <b>C</b> FID <b>S</b> ALKEEN <b>K</b> K <b>Y</b> LE <b>N</b> FSE <b>L</b> L <b>L</b> LYIIQENYD <b>R</b> AQ <b>Y</b> YS <b>Q</b> L <b>C</b> LQDF <b>L</b> KEW                                                                                             | 3107        |
| ALVINELLA    | --GDD <b>L</b> AT <b>F</b> IDNAMKV <b>T</b> ERR <b>A</b> LESQ <b>S</b> VE <b>L</b> L <b>L</b> YIWQEEYD <b>R</b> AMSHVDQ <b>A</b> I <b>Q</b> L <b>F</b> LQ <b>N</b> W                                                                                                       | 3064        |
| CAPITELLA    | --SQD <b>N</b> LL <b>S</b> FIE <b>S</b> LE <b>K</b> TP <b>V</b> H <b>K</b> AFIE <b>G</b> S <b>F</b> SS <b>E</b> LALVCIHQ <b>E</b> LYD <b>K</b> AK <b>H</b> YANMS <b>L</b> QAF <b>I</b> Q <b>D</b> W                                                                        | 3103        |
| SPONGE       | --SDH <b>G</b> L <b>A</b> S <b>F</b> L <b>D</b> K <b>S</b> LSE <b>A</b> NR <b>S</b> V <b>L</b> ESHYP <b>Q</b> EL <b>T</b> LSYVLRDDYD <b>R</b> A <b>Y</b> Y <b>L</b> SL <b>S</b> L <b>K</b> AK <b>Q</b> Q <b>I</b> W                                                        | 3134        |
| OYSTER       | --DQ <b>Q</b> LL <b>T</b> FID <b>D</b> CM <b>K</b> Q <b>T</b> E <b>Q</b> K <b>A</b> LIE <b>S</b> RYSE <b>L</b> AL <b>M</b> YIWQADYD <b>R</b> AR <b>H</b> YST <b>L</b> AT <b>Q</b> Q <b>F</b> LL <b>D</b> W                                                                 | 3099        |
| SNAIL        | --K <b>Q</b> S <b>L</b> LS <b>F</b> ID <b>D</b> SM <b>K</b> NP <b>Q</b> H <b>R</b> A <b>L</b> ESRYCE <b>D</b> LAL <b>M</b> YV <b>W</b> Q <b>K</b> NF <b>D</b> LAR <b>H</b> YAR <b>L</b> AV <b>Q</b> S <b>F</b> Q <b>D</b> W                                                | 3113        |
| TRICHOPLAX   | --AGSD <b>F</b> I <b>Q</b> Y <b>L</b> N <b>K</b> SLANDE <b>H</b> LS <b>V</b> LEN <b>R</b> H <b>C</b> D <b>L</b> AL <b>I</b> H <b>V</b> L <b>L</b> E <b>K</b> YD <b>R</b> AR <b>Y</b> Y <b>L</b> DF <b>S</b> I <b>Q</b> K <b>F</b> LQ <b>D</b> W                            | 3108        |
| SEA_ANEMONE  | --R <b>P</b> C <b>F</b> LE <b>F</b> LR <b>H</b> SM <b>N</b> EE <b>R</b> K <b>A</b> FL <b>E</b> SRYG <b>D</b> L <b>L</b> ALL <b>F</b> IL <b>R</b> DDY <b>G</b> RA <b>R</b> Y <b>H</b> VT <b>N</b> CF <b>Q</b> AF <b>L</b> K <b>D</b> W                                      | 3111        |
| PRIAPULA     | --ARD <b>Q</b> T <b>L</b> LS <b>F</b> VD <b>A</b> AT <b>G</b> HP <b>D</b> RR <b>A</b> VIE <b>T</b> W <b>H</b> GE <b>L</b> L <b>L</b> LYI <b>V</b> Q <b>G</b> DY <b>T</b> RA <b>R</b> H <b>H</b> AAR <b>C</b> L <b>Q</b> AF <b>L</b> R <b>D</b> W                           | 3155        |
| ESHARK       | --VD <b>Q</b> S <b>L</b> LT <b>F</b> VD <b>R</b> AM <b>K</b> VE <b>Q</b> R <b>K</b> AVIE <b>T</b> Y <b>S</b> Q <b>E</b> LS <b>L</b> LYI <b>L</b> Q <b>D</b> D <b>V</b> D <b>R</b> A <b>K</b> Y <b>I</b> INN <b>C</b> ME <b>V</b> F <b>M</b> Q <b>N</b> Y                   | 3133        |
| STERLET      | --PD <b>Q</b> S <b>L</b> LT <b>F</b> VD <b>N</b> AM <b>K</b> VE <b>E</b> R <b>K</b> SI <b>E</b> TSY <b>S</b> Q <b>E</b> LS <b>L</b> LYI <b>L</b> Q <b>G</b> D <b>F</b> D <b>R</b> A <b>K</b> Y <b>Y</b> V <b>N</b> CM <b>Q</b> V <b>F</b> M <b>Q</b> N <b>Y</b>            | 3141        |
| COELACANTH   | --GD <b>Q</b> S <b>L</b> LT <b>F</b> ID <b>N</b> AM <b>K</b> VE <b>E</b> R <b>K</b> AL <b>E</b> THYS <b>Q</b> E <b>L</b> S <b>L</b> LYI <b>L</b> Q <b>D</b> D <b>F</b> D <b>R</b> A <b>K</b> Y <b>Y</b> V <b>G</b> NC <b>M</b> Q <b>V</b> F <b>M</b> Q <b>N</b> Y          | 3132        |
| <b>HUMAN</b> | --AD <b>Q</b> S <b>L</b> LT <b>F</b> ID <b>K</b> AM <b>H</b> GE <b>L</b> Q <b>K</b> AI <b>L</b> E <b>L</b> HYS <b>Q</b> E <b>L</b> S <b>L</b> LY <b>L</b> L <b>Q</b> D <b>D</b> V <b>D</b> R <b>A</b> K <b>Y</b> I <b>Q</b> NG <b>I</b> Q <b>S</b> F <b>M</b> Q <b>N</b> Y | <b>3114</b> |
| CAECILIAN    | --DD <b>Q</b> S <b>L</b> LT <b>F</b> ID <b>N</b> AM <b>K</b> VE <b>Q</b> R <b>K</b> AL <b>E</b> T <b>N</b> Y <b>N</b> Q <b>E</b> LS <b>L</b> LYI <b>L</b> Q <b>D</b> D <b>F</b> D <b>R</b> A <b>K</b> Y <b>I</b> D <b>N</b> G <b>I</b> Q <b>V</b> F <b>M</b> Q <b>S</b> H  | 3134        |
| PLATYPUS     | --SD <b>Q</b> S <b>L</b> LT <b>F</b> ID <b>E</b> AM <b>K</b> KE <b>K</b> Q <b>K</b> T <b>L</b> IE <b>T</b> HYS <b>Q</b> E <b>L</b> S <b>L</b> LYI <b>L</b> Q <b>D</b> D <b>F</b> D <b>R</b> A <b>K</b> Y <b>I</b> D <b>Y</b> C <b>I</b> Q <b>I</b> F <b>M</b> Q <b>N</b> Y | 3122        |
| CANARY       | --ND <b>Q</b> T <b>L</b> LT <b>F</b> ID <b>E</b> AM <b>K</b> TE <b>Q</b> K <b>A</b> IE <b>M</b> HYS <b>Q</b> E <b>L</b> S <b>L</b> LYI <b>L</b> Q <b>D</b> D <b>F</b> D <b>R</b> A <b>K</b> Y <b>I</b> S <b>N</b> G <b>M</b> Q <b>I</b> F <b>M</b> Q <b>S</b> Y            | 3123        |
| OSTRICH      | --ND <b>Q</b> T <b>L</b> LT <b>F</b> ID <b>E</b> AM <b>K</b> TE <b>Q</b> K <b>A</b> IE <b>M</b> RY <b>S</b> Q <b>E</b> LS <b>L</b> LYI <b>L</b> Q <b>D</b> D <b>F</b> D <b>R</b> A <b>K</b> Y <b>I</b> S <b>N</b> G <b>L</b> Q <b>I</b> F <b>M</b> Q <b>S</b> Y            | 3093        |
| TURTLE       | --ND <b>Q</b> S <b>L</b> LT <b>F</b> ID <b>E</b> AM <b>K</b> IE <b>Q</b> R <b>K</b> ALIE <b>M</b> Y <b>S</b> Q <b>E</b> LS <b>L</b> LYI <b>L</b> Q <b>D</b> D <b>F</b> D <b>R</b> AR <b>Y</b> Y <b>I</b> S <b>S</b> G <b>M</b> Q <b>A</b> F <b>M</b> Q <b>N</b> Y          | 3132        |
| ALLIGATOR    | --SD <b>Q</b> S <b>L</b> LT <b>F</b> ID <b>E</b> AM <b>K</b> IE <b>Q</b> R <b>K</b> ALIE <b>M</b> HYS <b>Q</b> E <b>L</b> S <b>L</b> LYI <b>L</b> Q <b>D</b> D <b>F</b> D <b>R</b> AR <b>Y</b> Y <b>I</b> S <b>N</b> G <b>M</b> Q <b>V</b> F <b>M</b> Q <b>N</b> Y         | 3090        |
| SOFTCORAL    | --R <b>D</b> EV <b>F</b> FN <b>F</b> IF <b>D</b> SL <b>K</b> NE <b>E</b> R <b>K</b> V <b>I</b> LEN <b>K</b> Y <b>S</b> D <b>L</b> ALL <b>F</b> IL <b>D</b> E <b>D</b> YD <b>R</b> AR <b>Y</b> Y <b>T</b> S <b>I</b> CL <b>Q</b> AF <b>L</b> E <b>D</b> W                   | 3132        |
| STONYCORAL   | --G <b>D</b> MT <b>L</b> NE <b>F</b> V <b>A</b> KAM <b>T</b> S <b>E</b> R <b>A</b> AL <b>L</b> RS <b>R</b> Y <b>S</b> D <b>S</b> LAL <b>M</b> YV <b>L</b> Q <b>D</b> NC <b>D</b> S <b>A</b> S <b>Y</b> AA <b>L</b> SE <b>Q</b> S <b>F</b> L <b>S</b> D <b>W</b>            | 3159        |
| ACORN_WORM   | --T <b>D</b> D <b>Q</b> S <b>L</b> LT <b>F</b> ID <b>K</b> SM <b>Q</b> H <b>K</b> ER <b>K</b> ALIE <b>N</b> RY <b>S</b> E <b>L</b> AM <b>L</b> Y <b>L</b> L <b>Q</b> D <b>D</b> YD <b>R</b> AR <b>Y</b> Y <b>T</b> AN <b>C</b> I <b>Q</b> S <b>F</b> LQ <b>D</b> W         | 3153        |
| LANCELET     | --MD <b>Q</b> S <b>L</b> LN <b>F</b> VD <b>S</b> AM <b>Q</b> K <b>P</b> DR <b>K</b> AL <b>E</b> SRYCE <b>L</b> AM <b>L</b> Y <b>L</b> Y <b>Q</b> D <b>D</b> Y <b>G</b> RA <b>K</b> Y <b>Y</b> V <b>G</b> NC <b>T</b> DA <b>F</b> L <b>Q</b> E <b>W</b>                     | 3159        |
| SEA_URCHIN   | --E <b>D</b> D <b>S</b> LL <b>G</b> FID <b>S</b> SA <b>K</b> D <b>Q</b> E <b>K</b> R <b>V</b> IE <b>S</b> RY <b>T</b> E <b>L</b> AAL <b>S</b> IL <b>K</b> E <b>D</b> Y <b>N</b> RA <b>K</b> Y <b>L</b> AN <b>S</b> T <b>S</b> S <b>F</b> L <b>Q</b> E <b>W</b>             | 3155        |
| STARFISH     | --E <b>D</b> ET <b>L</b> L <b>Q</b> FID <b>A</b> SM <b>S</b> D <b>A</b> D <b>K</b> RA <b>F</b> LE <b>A</b> RY <b>S</b> E <b>L</b> ST <b>L</b> Y <b>T</b> I <b>Q</b> E <b>D</b> YD <b>R</b> AM <b>F</b> Y <b>L</b> AN <b>C</b> R <b>Q</b> S <b>F</b> L <b>H</b> D <b>W</b>  | 3173        |

**FAT**

|              |                                                                                                                                                                                                                                                                                                                        |             |
|--------------|------------------------------------------------------------------------------------------------------------------------------------------------------------------------------------------------------------------------------------------------------------------------------------------------------------------------|-------------|
| TERMITE      | AAL <b>N</b> PS <b>S</b> HN <b>L</b> --RT <b>K</b> Q <b>L</b> L <b>D</b> L <b>Q</b> KT <b>A</b> EL <b>K</b> AC <b>L</b> AFATNGE <b>H</b> SK <b>-</b> Q <b>E</b> --LL <b>A</b> K <b>E</b> L <b>V</b> K <b>R</b> W <b>K</b> N <b>K</b> NP                                                                                | 3095        |
| SHRIMP       | S <b>Q</b> Y <b>S</b> V <b>L</b> TP <b>N</b> P--LL <b>D</b> T <b>L</b> Q <b>N</b> V <b>Q</b> LL <b>T</b> E <b>L</b> SD <b>C</b> L <b>N</b> V <b>K</b> Y <b>A</b> DR <b>D</b> F <b>Y</b> SS--K <b>V</b> K <b>Q</b> T <b>V</b> T <b>S</b> W <b>K</b> K <b>Q</b> K <b>C</b>                                               | 3148        |
| SCORPION     | S <b>S</b> L <b>N</b> VM <b>P</b> II--R <b>K</b> T <b>K</b> L <b>Q</b> S <b>L</b> Q <b>K</b> H <b>I</b> E <b>L</b> Q <b>E</b> FL <b>N</b> FID <b>T</b> Y <b>R</b> N <b>-</b> ID <b>E</b> ---Y <b>H</b> F <b>K</b> N <b>L</b> T <b>D</b> R <b>W</b> L <b>K</b> R <b>Y</b> P                                             | 3161        |
| ALVINELLA    | A <b>G</b> L <b>D</b> AL <b>M</b> S <b>N</b> S--R <b>L</b> H <b>L</b> R <b>T</b> L <b>Q</b> K <b>L</b> E <b>M</b> H <b>E</b> FL <b>Q</b> IM <b>K</b> N <b>K</b> H <b>-</b> S--IS <b>F</b> Q <b>S</b> V <b>I</b> Q <b>A</b> N <b>A</b> W <b>M</b> R <b>R</b> S <b>P</b>                                                 | 3119        |
| CAPITELLA    | AN <b>L</b> S <b>T</b> TR <b>T</b> ST--R <b>A</b> T <b>K</b> L <b>Q</b> K <b>L</b> Q <b>E</b> FT <b>E</b> M <b>Q</b> E <b>F</b> LS <b>V</b> I <b>K</b> T <b>T</b> S <b>G</b> -E--D <b>F</b> P <b>R</b> Q <b>I</b> D <b>R</b> T <b>L</b> H <b>K</b> W <b>E</b> A <b>R</b> S <b>P</b>                                    | 3158        |
| SPONGE       | S <b>V</b> Q <b>D</b> G <b>I</b> SS <b>S</b> T <b>G</b> AV <b>S</b> S <b>T</b> V <b>Q</b> S <b>L</b> Q <b>R</b> L <b>T</b> E <b>M</b> NE <b>F</b> IF <b>M</b> K <b>S</b> N <b>D</b> N <b>-</b> F <b>S</b> S <b>P</b> --G <b>P</b> V <b>N</b> LL <b>R</b> K <b>W</b> R <b>K</b> R <b>F</b> P                            | 3191        |
| OYSTER       | S <b>S</b> T <b>D</b> SL <b>M</b> S <b>V</b> S--R <b>K</b> S <b>Q</b> L <b>Q</b> R <b>L</b> Q <b>P</b> L <b>V</b> E <b>L</b> Q <b>E</b> FL <b>S</b> F <b>M</b> A <b>S</b> E <b>G</b> N <b>-</b> F <b>T</b> S <b>V</b> --T <b>P</b> AN <b>S</b> L <b>I</b> E <b>R</b> W <b>Q</b> A <b>R</b> A <b>L</b>                  | 3154        |
| SNAIL        | S <b>S</b> T <b>D</b> SL <b>M</b> T <b>A</b> S--R <b>T</b> H <b>L</b> Q <b>R</b> L <b>Q</b> P <b>L</b> L <b>E</b> L <b>Q</b> E <b>F</b> L <b>D</b> F <b>V</b> A <b>D</b> K <b>N</b> N <b>-</b> F <b>T</b> S <b>F</b> --E <b>P</b> S <b>H</b> Q <b>L</b> I <b>A</b> R <b>W</b> E <b>Q</b> R <b>Y</b> P                  | 3168        |
| TRICHOPLAX   | S <b>A</b> L <b>D</b> ST <b>L</b> L <b>Y</b> S--R <b>A</b> S <b>K</b> L <b>Q</b> S <b>L</b> Q <b>T</b> L <b>T</b> E <b>M</b> Q <b>E</b> FL <b>Q</b> F <b>M</b> D <b>D</b> G <b>R</b> N <b>-</b> F <b>E</b> S <b>V</b> --T <b>P</b> V <b>L</b> S <b>L</b> I <b>S</b> K <b>W</b> S <b>T</b> R <b>F</b> P                 | 3163        |
| SEA_ANEMONE  | S <b>G</b> L <b>S</b> SM <b>V</b> S <b>S</b> --R <b>A</b> S <b>K</b> L <b>Q</b> S <b>I</b> Q <b>K</b> I <b>T</b> E <b>M</b> Q <b>E</b> FL <b>E</b> F <b>V</b> V <b>K</b> E <b>G</b> K <b>-</b> LL <b>K</b> ---K <b>T</b> L <b>E</b> D <b>L</b> F <b>S</b> R <b>W</b> S <b>V</b> R <b>F</b> P                           | 3165        |
| PRIAPULA     | A <b>S</b> L <b>D</b> AL <b>M</b> L <b>A</b> S--R <b>A</b> A <b>R</b> L <b>R</b> S <b>L</b> Q <b>K</b> L <b>T</b> E <b>M</b> NE <b>F</b> L <b>D</b> A <b>I</b> T <b>A</b> P <b>D</b> A <b>F</b> TR <b>N</b> --D <b>T</b> A <b>R</b> A <b>L</b> V <b>D</b> R <b>W</b> M <b>D</b> H <b>M</b> P                           | 3211        |
| ESHARK       | S <b>S</b> I <b>D</b> T <b>L</b> L <b>H</b> Q <b>S</b> --R <b>L</b> T <b>K</b> L <b>Q</b> S <b>L</b> Q <b>A</b> V <b>T</b> E <b>M</b> Q <b>D</b> F <b>L</b> H <b>F</b> I <b>S</b> K <b>E</b> Y <b>N</b> -F <b>I</b> S <b>E</b> --V <b>P</b> L <b>R</b> K <b>L</b> L <b>R</b> T <b>W</b> T <b>G</b> R <b>Y</b> P        | 3188        |
| STERLET      | S <b>S</b> I <b>D</b> T <b>L</b> L <b>P</b> G <b>S</b> --R <b>L</b> T <b>K</b> L <b>Q</b> S <b>V</b> Q <b>A</b> L <b>T</b> E <b>I</b> Q <b>D</b> F <b>L</b> N <b>F</b> M <b>T</b> K <b>D</b> ---V <b>S</b> Q <b>-</b> T <b>S</b> L <b>K</b> S <b>L</b> I <b>R</b> I <b>W</b> T <b>D</b> R <b>Y</b> P                   | 3193        |
| COELACANTH   | S <b>S</b> I <b>D</b> T <b>L</b> Q <b>H</b> K <b>S</b> --R <b>L</b> T <b>K</b> L <b>Q</b> S <b>V</b> Q <b>A</b> L <b>T</b> E <b>M</b> Q <b>D</b> F <b>L</b> G <b>F</b> I <b>S</b> K <b>P</b> D <b>H</b> -L <b>N</b> S <b>R</b> --A <b>S</b> L <b>R</b> R <b>L</b> L <b>R</b> N <b>W</b> S <b>D</b> R <b>Y</b> P        | 3187        |
| <b>HUMAN</b> | S <b>S</b> I <b>D</b> V <b>L</b> L <b>H</b> Q <b>S</b> --R <b>L</b> T <b>K</b> L <b>Q</b> S <b>V</b> Q <b>A</b> L <b>T</b> E <b>I</b> Q <b>E</b> F <b>I</b> S <b>F</b> I <b>S</b> K <b>Q</b> G <b>N</b> -L <b>S</b> S <b>Q</b> --V <b>P</b> L <b>K</b> R <b>L</b> L <b>N</b> T <b>W</b> T <b>N</b> R <b>Y</b> P        | <b>3169</b> |
| CAECILIAN    | S <b>S</b> I <b>D</b> T <b>L</b> L <b>N</b> K <b>S</b> --R <b>L</b> T <b>K</b> L <b>Q</b> S <b>V</b> Q <b>A</b> L <b>T</b> E <b>T</b> K <b>D</b> F <b>I</b> H <b>F</b> I <b>S</b> K <b>P</b> S <b>N</b> -L <b>T</b> S <b>Q</b> --T <b>S</b> L <b>K</b> R <b>L</b> L <b>R</b> I <b>W</b> S <b>S</b> R <b>Y</b> P        | 3189        |
| PLATYPUS     | S <b>N</b> I <b>D</b> ALL <b>L</b> Q <b>S</b> --R <b>L</b> T <b>K</b> L <b>Q</b> S <b>V</b> Q <b>A</b> L <b>T</b> E <b>I</b> Q <b>D</b> F <b>T</b> N <b>F</b> I <b>S</b> R <b>P</b> S <b>N</b> -L <b>S</b> S <b>Q</b> --A <b>S</b> L <b>K</b> R <b>L</b> L <b>R</b> I <b>W</b> T <b>N</b> R <b>Y</b> P                 | 3177        |
| CANARY       | S <b>S</b> I <b>D</b> S <b>L</b> L <b>Y</b> Q <b>S</b> --R <b>I</b> T <b>K</b> L <b>Q</b> S <b>V</b> Q <b>A</b> L <b>T</b> E <b>I</b> Q <b>D</b> F <b>I</b> N <b>F</b> M <b>T</b> K <b>R</b> S <b>N</b> -L <b>A</b> S <b>E</b> --A <b>S</b> L <b>K</b> R <b>L</b> L <b>R</b> T <b>W</b> T <b>S</b> R <b>Y</b> P        | 3178        |
| OSTRICH      | S <b>S</b> T <b>D</b> T <b>L</b> L <b>H</b> Q <b>S</b> --R <b>M</b> T <b>K</b> L <b>Q</b> S <b>V</b> Q <b>T</b> L <b>T</b> E <b>I</b> Q <b>D</b> F <b>I</b> H <b>F</b> M <b>T</b> K <b>T</b> S <b>N</b> -L <b>A</b> S <b>Q</b> --A <b>S</b> L <b>K</b> R <b>L</b> L <b>R</b> I <b>W</b> T <b>S</b> R <b>Y</b> P        | 3148        |
| TURTLE       | S <b>S</b> I <b>D</b> T <b>L</b> L <b>H</b> Q <b>S</b> --R <b>L</b> T <b>K</b> L <b>Q</b> S <b>V</b> Q <b>A</b> L <b>T</b> E <b>I</b> Q <b>E</b> F <b>I</b> N <b>F</b> I <b>S</b> K <b>P</b> S <b>S</b> -L <b>A</b> S <b>Q</b> --V <b>S</b> L <b>K</b> R <b>L</b> L <b>R</b> I <b>W</b> T <b>S</b> R <b>Y</b> P        | 3187        |
| ALLIGATOR    | S <b>S</b> I <b>D</b> ALL <b>H</b> Q <b>S</b> --R <b>L</b> T <b>K</b> L <b>Q</b> S <b>V</b> Q <b>A</b> L <b>T</b> E <b>I</b> Q <b>D</b> F <b>I</b> N <b>F</b> M <b>R</b> E <b>P</b> S <b>N</b> -L <b>A</b> S <b>Q</b> --A <b>S</b> L <b>K</b> R <b>L</b> L <b>R</b> I <b>W</b> T <b>S</b> R <b>Y</b> P                 | 3145        |
| SOFTCORAL    | S <b>G</b> L <b>D</b> S <b>I</b> M <b>T</b> S <b>S</b> --R <b>S</b> A <b>H</b> L <b>Q</b> S <b>L</b> Q <b>A</b> L <b>T</b> E <b>M</b> Q <b>E</b> FL <b>D</b> F <b>I</b> S <b>H</b> E <b>D</b> N <b>-</b> F <b>T</b> S <b>I</b> S <b>-</b> S <b>V</b> K <b>S</b> L <b>L</b> K <b>R</b> W <b>S</b> S <b>R</b> E <b>P</b> | 3187        |
| STONYCORAL   | A <b>G</b> L <b>D</b> S <b>N</b> L <b>R</b> S <b>S</b> --R <b>S</b> I <b>K</b> L <b>Q</b> S <b>L</b> Q <b>K</b> I <b>T</b> E <b>M</b> Q <b>E</b> FL <b>E</b> F <b>I</b> A <b>E</b> E <b>G</b> N <b>-</b> F--S <b>S</b> P <b>M</b> P <b>V</b> L <b>S</b> LL <b>N</b> K <b>W</b> Y <b>S</b> R <b>L</b> P                 | 3214        |
| ACORN_WORM   | S <b>G</b> T <b>D</b> T <b>L</b> M <b>G</b> T <b>I</b> --R <b>S</b> S <b>K</b> L <b>Q</b> C <b>V</b> Q <b>K</b> L <b>S</b> E <b>M</b> Q <b>E</b> FL <b>F</b> I <b>T</b> N <b>E</b> R <b>N</b> -F <b>D</b> E <b>H</b> K--P <b>V</b> S <b>D</b> L <b>I</b> S <b>K</b> W <b>T</b> K <b>R</b> L <b>P</b>                   | 3208        |
| LANCELET     | S <b>G</b> M <b>D</b> R <b>L</b> M <b>T</b> S <b>S</b> --R <b>A</b> A <b>K</b> L <b>Q</b> S <b>L</b> Q <b>K</b> L <b>T</b> E <b>M</b> Q <b>E</b> FL <b>E</b> L <b>I</b> S <b>N</b> D <b>R</b> N <b>-</b> F--E <b>T</b> P <b>W</b> P <b>V</b> T <b>R</b> L <b>L</b> E <b>K</b> W <b>S</b> S <b>R</b> Y <b>P</b>         | 3214        |
| SEA_URCHIN   | S <b>G</b> L <b>G</b> P <b>L</b> M <b>L</b> T <b>S</b> --R <b>L</b> S <b>K</b> L <b>Q</b> D <b>I</b> Q <b>K</b> L <b>T</b> E <b>A</b> E <b>Q</b> F <b>L</b> Q <b>L</b> A <b>N</b> K <b>P</b> F <b>S</b> -E <b>G</b> L <b>K</b> S--S <b>A</b> T <b>R</b> L <b>V</b> S <b>D</b> W <b>S</b> R <b>N</b> L <b>P</b>         | 3210        |
| STARFISH     | S <b>G</b> L <b>G</b> P <b>L</b> M <b>I</b> S <b>S</b> --R <b>R</b> A <b>K</b> L <b>Q</b> C <b>I</b> Q <b>R</b> L <b>T</b> E <b>K</b> Q <b>N</b> F <b>L</b> K <b>L</b> A <b>I</b> K <b>P</b> D <b>L</b> -Q <b>E</b> A <b>I</b> G <b>C</b> Q <b>S</b> L <b>E</b> L <b>L</b> D <b>R</b> W <b>S</b> G <b>C</b> H <b>L</b> | 3230        |

**FAT**

Supplementary Figure 2: CLUSTAL OMEGA DNA-PKcs METAZOA VERTEBRATE INVERTEBRATE

|              |                                                                  |             |
|--------------|------------------------------------------------------------------|-------------|
| TERMITE      | SA-FDSSLRWDIRAMYRKKFTNRIDQMLENT-----GA-----                      | 3127        |
| SHRIMP       | RIDDNPL-MTQCLASYRDLYLHLEKLPED-----S-----                         | 3179        |
| SCORPION     | DI-FDSVNIWDDIIMNRSLYMEKIVSKLQETFNQSTFSLEESMDTISVD-----S          | 3211        |
| ALVINELLA    | DPVVDPTTIWDDVMSYRILYLDQMAQHLKNI-----SK-----                      | 3152        |
| CAPITELLA    | DRLLDSVVIWDDNIILNRNVYMDHFAEHLTSI-----DA-----                     | 3191        |
| SPONGE       | DPKLDPVPIWDDIITTRWMMLRKISTKLQDS-----VLSQQCEYLLDDDG-----          | 3236        |
| OYSTER       | HPLLDTEAVWDDVVTNRMVFLDHSNRLSTS-----LV-----KKE                    | 3190        |
| SNAIL        | HVQLDLVDIWDVVTNRNVYMDKIRDQMLSS-----NL-----MEE                    | 3204        |
| TRICHOPLAX   | NEVIDPINVWDDVIVNRCMYLRKILLQYRVIQTAFT--STEDSME--IDGEDRVIYT---     | 3216        |
| SEA_ANEMONE  | NSKLRHPISVWDDVITNRRIFGLTVC-----V--YRPDSMD--VDGEWS-CPS---         | 3207        |
| PRIAPULA     | HPTLDPVSIWDDTVINRCLYMDHLSRHFHGN-----QP-----                      | 3244        |
| ESHARK       | DAKMDPMSIWDVITNRCFFLDKIQERLVSV-----QADESME--VDREGEVETRMEV        | 3239        |
| STERLET      | DAKMDPMNVWDDIITTRCFFLDKIQEKLTPS-----EADNSME--VDGGEDTGVKMEV       | 3244        |
| COELACANTH   | DAKMDPVNIWDDIITNRCFFLDKIQEHLCKV-----PADESME--VDGEGDASPRMDV       | 3238        |
| <b>HUMAN</b> | <b>DAKMDPMNIWDDIITNRCFFLSKIEEKLTPS-----PEDNSMN--VDQGDGDSRMEV</b> | <b>3220</b> |
| CAECILIAN    | DSKMDPMNVWDDIITNRCFFLDKIREKLPHF-----QADDSME--VDGGGDASDRMEL       | 3240        |
| PLATYPUS     | DAKMDPMNIWDDIITNRCFFLSKIQEKLQAGL-----QADDSME--MDGGDTPDRMEL       | 3228        |
| CANARY       | DAKMDPMNIWDDIITNRCFFLDKIQEKLPSD-----QANDSME--VDGEYSAGDQMEV       | 3229        |
| OSTRICH      | DAKMDPMNIWDDIITNRCFFLDKIQEKLPRD-----QANDSME--VDEKDDIGDQMEA       | 3199        |
| TURTLE       | DDKMDPMNIWDDIITNRCFFLGKIQEKLQNI-----QADDSME--VDGRGDVGDQMET       | 3238        |
| ALLIGATOR    | DAKMDPMNIWDDIITNRCFFLDKIQEKLQNV-----QADDSME--VVEAGDIGDEMEV       | 3196        |
| SOFTCORAL    | DPKLSVGVWDDVMTNRSVFLDKILLKFGQS-----SQ-----LHSEDSMEI              | 3230        |
| STONYCORAL   | HPILHPIGVWDDIVTNRVLFMSKFLQKFEAM-----GA-----EERSGIC---            | 3254        |
| ACORN_WORM   | DVKRDSNTNTWDDVITNRFVYLRKLFQKSGDA-----ME-----G--D-----            | 3243        |
| LANCELET     | DNRMDDPISVWDDIITNRCFLYLDKLNKDFEQM-----AA-----RGVLD--TEV          | 3255        |
| SEA_URCHIN   | DPKRPDISVWDDVTQYRCLYMDKLCNLLGDS-----GG-----GGGGGDSMET            | 3253        |
| STARFISH     | DSKKDPINIWDDVVSNRLLYMDKLGSRFIRS-----ES-----QQAGE-----            | 3268        |

**FAT**

|              |                                                                   |             |
|--------------|-------------------------------------------------------------------|-------------|
| TERMITE      | -----SNA----LSRTELAMVDSALYQENFYIARKYLREAREKMS---NSGTPMELQ         | 3172        |
| SHRIMP       | ----LDVSNLIKDTKNFTHRFVIRAAALHNRYHLANRHLKISSLSEDEYSKA----Q         | 3229        |
| SCORPION     | EPNSYFDESEKFLKEQRLKMKLKFVEAALLQGNLQVAVKHLKWSQQIAKE--LKADHHWIN     | 3269        |
| ALVINELLA    | ---ESGMDDDIFNEHKVFNRLKQAEANQNNFPVALKQMKATFNLVKGG--VKNKTLHIE       | 3207        |
| CAPITELLA    | ---KCI----DPFGKQRVVMSLAQVDAASLQGNHVSARKLLKSAKDLVKV--VDSEELSVL     | 3242        |
| SPONGE       | ---SSCVDSMMKNENINMFMRAADAARTQSNYPVAENYLIKIVEKSILKDFPDNYFIQLR      | 3293        |
| OYSTER       | EDAMEEDEEDLFLASKIHLRLKMDSSCHKRNHKLALNILADIHKNYRD--KENEILNLE       | 3248        |
| SNAIL        | ----DHDSSIFEDIKLRQQLKLAHSCQEQNNFNLTLRILKETYCKCR--EKSELLVVE        | 3257        |
| TRICHOPLAX   | ---FPALKKRIAEEVSLYLKLADTARLQSNYPVAIKHLRQTLYHINQELDKDELLTVK        | 3272        |
| SEA_ANEMONE  | ---VDALRERITREVALQLKMQAAREQSNFPVAHRYLRESLKSIED-----NLHVK          | 3257        |
| PRIAPULA     | -----AGSDPFLEQKFNFLAYQQSAMQRNPQVALKHLRTTNQLLK--KLDSDSLAVQ         | 3296        |
| ESHARK       | DK-EEEDINMAIRSCFNMKLMKMAESGTKQNNFVAMKLLKELHKES---KARDDWAVK        | 3294        |
| STERLET      | DE--PEDVGS MIRGCKFSMKLMMADSARKQNNFVATKLLKELHRES---KNQEDWLVR       | 3298        |
| COELACANTH   | DE--EPNISAMVQSCFNMKLMKMAESARKQNNFVATKLLKELHRES---KSRECLTR         | 3292        |
| <b>HUMAN</b> | <b>QE-QEEDISSLIRSCFNMKLMKMAESARKQNNFVATKLLKELHRES---KTRDDWLVS</b> | <b>3275</b> |
| CAECILIAN    | GG-EEEDITSMIKSCFNMKLMKMAESARKQNNFVAMKLLKDLHRES---KTRDDWSVR        | 3295        |
| PLATYPUS     | EK-QEDDIYSMIESCKFSMKMKMIESARSQNNFRVAMKLLKDLHRES---KTKDDWLVR       | 3283        |
| CANARY       | DQ-QGENIHSMIKSCFNMKMKMIESARKQNSFAVAKKLLKDLRKEA----RWREDWLVR       | 3284        |
| OSTRICH      | DQ-QGEDISSMIRSCFNMKMKMIESARKQNSFVAKKLLKYLHREA----KTREDWLVR        | 3254        |
| TURTLE       | DM-QEEDIHSMIRSCFNMKMKMIESARKQNSFVAMKLLKDLHRES---KTREDWLVR         | 3293        |
| ALLIGATOR    | DQ-QEDNIHSMIRSCFNMKMKMIESARKQNSFAVAKKLLKDLKRES---KTRDSWLVR        | 3251        |
| SOFTCORAL    | DGLNNTQLEEIFLRERVLFSRLSEVATGQVNFVAKKQLQSSLHLIRDRKNDSELEVL         | 3290        |
| STONYCORAL   | -L---DDIKDKFFKQEVLELKLCMANAQEQGNFYVAHRCLEALYKI---PQGNENLNIS       | 3307        |
| ACORN_WORM   | DG---QAMVNAISKDKLLMELKLVDSVVSQNNFVAKKYLKRNKADA----RDDDARLI        | 3296        |
| LANCELET     | GG---EPFSHRAQREQLLRVLVADSAREQANFPVALKHLKNTLKDF---TEDDPLRLR        | 3308        |
| SEA_URCHIN   | ED---QKFDDLVRRKVLKMKMADSACQANFCVAKHLKSTHRGL---VEFEDLRPA           | 3306        |
| STARFISH     | EE---TALEKRILRERLWLELKMADSACQGNFVAQKHLKATHGSL---SAHEDLKP          | 3321        |

**FAT**

Supplementary Figure 2: CLUSTAL OMEGA DNA-PKcs METAZOA VERTEBRATE INVERTEBRATE

|              |                                                                    |             |
|--------------|--------------------------------------------------------------------|-------------|
| TERMITE      | CSLAYSKAKWLQAQLK--NTTDEKLLKGLDWSVIEDQR-----FEQ                     | 3212        |
| SHRIMP       | FYFLMAETHILRGQGK----QTDRLKYLVEAWAKYLGRVSSM-----SILDQNPVVEIQ        | 3279        |
| SCORPION     | CIHLYCKIDLKAK---NQNYPEQLDTLCA-HKQLAKLDLH-----FPKKLDVSTMN           | 3318        |
| ALVINELLA    | CYHEWTRIQHKKCKVA-SLTTNEKIKALLET-MNVLEQ-----RAVDDSRVKCS             | 3254        |
| CAPITELLA    | FTHSHANANKRKCASG-SEP-SERLNLVVEV-KKRLDKCSES-----STLKLNAALLCD        | 3293        |
| SPONGE       | WLHSLIKVRLDRIH---QDPSPDTMEAVISL-TCQMDNFKGRLGGSGKGAISS-KPFISQ       | 3348        |
| OYSTER       | WSHLYAKTHQLSAMSADTDWTNDIFSSVIT-IDLKGFKDS-----SLFEREAGLR            | 3301        |
| SNAIL        | WSHLYATTHQKALSCSGIWSKDMLYNVLST-LDPLSKVAES-----KMLREKPALGMR         | 3310        |
| TRICHOPLAX   | WTHIYTKVHCDSL---LTPPDERLKTLLTA-NSQFEKVKDL-----SVILENTTLMRE         | 3322        |
| SEA_ANEMONE  | WTHAYAVTQQKKAH---GLMAIDAVQTALST-VSKLGKP-SI-----NTLANDPVIALR        | 3306        |
| PRIAPULA     | WTHSYVRTWQQIATGH-QRDSADRLHRLDIT-IKELDKHAGK-----AVLHQQRGLARE        | 3348        |
| ESHARK       | WHTYRSRLSHRRSQ---RQARPEQVVTVLKS-IPLLVEI-NV-----DYLNTHTRILRD        | 3343        |
| STERLET      | WVHSFRFSHTRSH---TQSSSEQILTVLKT-IPLLEER-KI-----DYTKATTRIVRD         | 3347        |
| COELACANTH   | WVHSYSRFGHSRSQ---SQSCPERIQVMKT-ISLLEES-KA-----DYLKNTALRLD          | 3341        |
| <b>HUMAN</b> | <b>WVQSYCRLSHCRSR---SQGCSEQVLTVLKT-VSLLDENNVS-----SYLSKNILAFRD</b> | <b>3325</b> |
| CAECILIAN    | WIHSYCHYTHRSRQ---SQTSPDQVLSVIKT-VSLEET-KA-----DYLRENTREFRN         | 3344        |
| PLATYPUS     | WNHNYCRCSSHSQSQ---SQSSPEKILTVLKT-VSLLDDN-LS-----SYLSKNIVASRN       | 3332        |
| CANARY       | WNYAYCRFTHSSSR---NLSCEPERVLSVLT-LSLEEDT-KS-----DYLKNIAMFRN         | 3333        |
| OSTRICH      | WNYAYCRFTHSSSR---NLSCEPERVLSVLT-LSLEEDT-KS-----DYLKNIAMFRN         | 3303        |
| TURTLE       | WNHSYCRFHSRSQ---SQNSPEQMLTVLKT-ISLLEES-KS-----DYLKNIAMFRN          | 3342        |
| ALLIGATOR    | WNHSYCHVSHSSCQ---TQSSPQQILTVLKT-VSLLDEN-VP-----DHLKSNIEILRN        | 3300        |
| SOFTCORAL    | WTHSYGDLNCKKCP---NLLPEAVDTAISA-LDQLDKIKDS-----KVLQENASTGIR         | 3340        |
| STONYCORAL   | WSHTYAEVHFRKIQ---TLTAVGAVETALLV-AGQLDKFSAS-----KILEIEPLRGIQ        | 3357        |
| ACORN_WORM   | WTLSYARLHQKCL---TLPPSKRVINLTT-LDQLGMFTG-----CEPSYRKQ               | 3342        |
| LANCELET     | WTHCYARLHQKAS---LLTGADKLNNTT-FEQLDKFSSC-----RVFEDLAVAKQ            | 3358        |
| SEA_URCHIN   | WTHSYVSMTQRKAL---LLKPYERTSLKA-LDHLGKLPVS-----HNLGSDLFLCD           | 3356        |
| STARFISH     | WTHSYVQMNQKIL---TIELKEQVMTLTT-FDPLAKLSNT-----PALTGDYCLTRH          | 3371        |

FAT

|              |                                                                  |             |
|--------------|------------------------------------------------------------------|-------------|
| TERMITE      | YPMLEHAETLQHVSVMAAGILQQLEQQPGVLTKLPA-----AEVKKLADRIG-APDCSQ      | 3264        |
| SHRIMP       | YKLESHLCLC-----ICRAIQDMGDDWTFEDNQYMQVL---SKFE-----NANGK          | 3322        |
| SCORPION     | HYLLQSEIIEEM-----AADIVKYNDVHA-----EKIQELTDTFSIQSK                | 3356        |
| ALVINELLA    | QHILQEQALFQ-----LISLLKDDIHVLEDEYRN-----EI---QNITH-CGTYDH         | 3295        |
| CAPITELLA    | QHLQGEHLVT-----MATILQNVKIDIDALDQ-----KLEKITESVG-SPALSH           | 3338        |
| SPONGE       | HHVLLGKLLNK-----MAEIFATPEDGMLALS-----LSNDGNTKLNLSLIGG-TPSTST     | 3397        |
| OYSTER       | HFVLLGQAFGL-----LVKGVQSENCFFSS-LSD-----KNSEKIMGISK-ASKLNP        | 3345        |
| SNAIL        | HMILESRTFDA-----VVTGLMSVGNLEE-LGD-----KTCEKLQYTK--SPLNK          | 3353        |
| TRICHOPLAX   | HLLLRSRLDM-----TSKILAESDASIL-----DLLNEKESLYQLANV-NQHDSK          | 3368        |
| SEA_ANEMONE  | HHILRSRCFDI-----LTDIAGAGRSTLATYKLIICLINQPVDKSYPCNV-CLQ---        | 3355        |
| PRIAPULA     | NLLKGRSIEA-----VAREVLTTRPASLHTLPA-----AT--REKLSLVAG-AREHDH       | 3393        |
| ESHARK       | QNTLLGSSYCI-----LADALNKEPTCLQRIKE-----DQ--AERVIEHSG-SSSEEI       | 3388        |
| STERLET      | QNILLGTTYHI-----MANALTRDGLALEHIGE-----DK--AGKVLDDLQ-TTSDNL       | 3392        |
| COELACANTH   | QNILLGTTYNI-----IANALNKTPSTLQDIGE-----EK--ARKIQDLGSG-AQSDHP      | 3386        |
| <b>HUMAN</b> | <b>QNILLGTTYRI-----IANALSSEPACLAIEIE-----DK--ARRILELSG-SSEDS</b> | <b>3370</b> |
| CAECILIAN    | QNILLGTTYSI-----IANALCKDPRCLQRIDK-----NK--ADKVLQLSG-TMSEN        | 3389        |
| PLATYPUS     | QKLLGTTYRI-----MANALSKEPASLEQIER-----NK--ARKVMELSG-ASFVNV        | 3377        |
| CANARY       | QNLLGTTYQI-----MANALSQDPRCLQIEK-----EK--ARKISLISG-ESLENP         | 3378        |
| OSTRICH      | QNLLGTTYRI-----MADALSHDPRCLQIEE-----EK--ARKVSVLSG-ESLESP         | 3348        |
| TURTLE       | QNLLGTTYHI-----LASALSKDPGCKLEKIEE-----EK--ARKVVMLSG-ERPENS       | 3387        |
| ALLIGATOR    | QNLLGTTYRI-----MAVALSKDPRCLVELEE-----DK--VRKVSMLSG-EKPDSP        | 3345        |
| SOFTCORAL    | HHLKSRNLDA-----ITNVLSIPGTW---DSLE-----KEAKEKLHGLCSS-KNPEQL       | 3385        |
| STONYCORAL   | HHILRSKTFDI-----LCKAMLDGGVVIATLES-----QAKN-ALVKLCRI-DETESQ       | 3403        |
| ACORN_WORM   | HEILSGRSCHL-----VAQTIQEAGDDIFDVIH-----LKCRKS-----LRSLIE          | 3382        |
| LANCELET     | HHTLTSLSYEI-----VAHALIQEGGAILTGLK-----DTRHAQLLTAAGV-SPDTSV       | 3405        |
| SEA_URCHIN   | HRIILTSKTYQS-----MASALQEEKGEMLTRLS-----DAGKLDKLLSKAE-CQESKP      | 3403        |
| STARFISH     | HHTLTSKSYDL-----VAITAIQKGGADILTGLR-----NVGKLDKLLGLVG-QNATRP      | 3418        |

FAT



Supplementary Figure 2: CLUSTAL OMEGA DNA-PKcs METAZOA VERTEBRATE INVERTEBRATE

|              |                                                                                                                                                                                                                                                                                                    |             |
|--------------|----------------------------------------------------------------------------------------------------------------------------------------------------------------------------------------------------------------------------------------------------------------------------------------------------|-------------|
| TERMITE      | DTLMQN <b>L</b> KQYGLSSSLKTAAEVVT-----RGNSEQAVAKAYLQVAKY <b>C</b> RAHSNTS                                                                                                                                                                                                                          | 3314        |
| SHRIMP       | ESWQRE <b>L</b> LSCSYKSLQLAVNCAEGKLVKS--DALNQDDSKKSDSDAHLALVKY <b>C</b> ECECVIKW                                                                                                                                                                                                                   | 3381        |
| SCORPION     | SKLEID <b>L</b> FCNKNEYKCRaidI IQEVEQK-----MIEFDQATIGETyFK <b>F</b> ANyCNKILRMQ                                                                                                                                                                                                                    | 3411        |
| ALVINELLA    | EKVIM <b>L</b> TEECYRQMKAAVVASDSSC-----SDDTKINMAHMA <b>L</b> VSYCDTYLRQS                                                                                                                                                                                                                           | 3346        |
| CAPITELLA    | QEIVAS <b>L</b> HEAAYNSFKSGVGAAS--Q-----PESVCVNKAYMS <b>L</b> VH <b>F</b> CDQVLRQR                                                                                                                                                                                                                 | 3387        |
| SPONGE       | KAISEG <b>L</b> WIQALSSFNAGVRSgTTLNP-----LTKDPVPTVQSLEEL <b>F</b> G <b>F</b> CDNALRQE                                                                                                                                                                                                              | 3450        |
| OYSTER       | RELAR <b>L</b> VEEGYNQMRKSLSYDGRG-----TRTCRYGLEEAYLALAQY <b>C</b> NKFLRMA                                                                                                                                                                                                                          | 3396        |
| SNAIL        | GD <b>L</b> IKELIHHGYESLRKVISEVPED-----SSRDAVCLQDDVQLALAKY <b>C</b> DKYLRLA                                                                                                                                                                                                                        | 3405        |
| TRICHOPLAX   | EKIAAK <b>L</b> TSHACQALHQAV-----KAS-----KEERGSSYIEAMMM <b>V</b> N <b>F</b> CDDILRHE                                                                                                                                                                                                               | 3417        |
| SEA_ANEMONE  | --IVS <b>L</b> Q <b>L</b> ITRSFTSLQEANKAAKQAATS-----SSDGSTTCMVEAMM <b>V</b> PFCDRALRRK                                                                                                                                                                                                             | 3408        |
| PRIAPULA     | TALV <b>S</b> GLISAGFRELREAVDVGDEEESSASLAS-----SPSAAHVAMAS <b>V</b> CDYFLRVR                                                                                                                                                                                                                       | 3446        |
| ESHARK       | QEVVIG <b>L</b> HRKTLHYLERAVRKAEEVQSL---AGEHVDIAGVIEAYVNLAN <b>F</b> CDRCLREK                                                                                                                                                                                                                      | 3445        |
| STERLET      | EQVVV <b>L</b> HRKALQHLQNAVKKAEELQSR---STEHDIPGAIEAYMT <b>L</b> VN <b>F</b> CDKRLREE                                                                                                                                                                                                               | 3449        |
| COELACANTH   | EQIVIS <b>L</b> YRKALSYLQTAAKKAEQVQSR---STEHDVAGVIEAYMT <b>L</b> V <b>F</b> CDKRLREV                                                                                                                                                                                                               | 3443        |
| <b>HUMAN</b> | <b>E</b> KVIAG <b>L</b> YQ <b>R</b> A <b>F</b> Q <b>H</b> L <b>S</b> E <b>A</b> V <b>Q</b> A <b>A</b> E <b>E</b> E <b>A</b> Q <b>P</b> P---S <b>W</b> S <b>C</b> G <b>P</b> A <b>A</b> G <b>V</b> I <b>D</b> A <b>Y</b> M <b>T</b> L <b>A</b> D <b>F</b> <b>C</b> D <b>Q</b> <b>L</b> R <b>K</b> E | <b>3427</b> |
| CAECILIAN    | DEVAAS <b>L</b> FKKSFHYLDSAVKKAEEVQSR---AMENVDTTGVIKAYMT <b>L</b> V <b>F</b> CDTHLLKK                                                                                                                                                                                                              | 3446        |
| PLATYPUS     | KQVIAG <b>L</b> HRRAFQYLTHAVRKAEEVQSH---SSEHVDTTGGVIDTYMT <b>L</b> V <b>F</b> CDKHLRNE                                                                                                                                                                                                             | 3434        |
| CANARY       | KKVLG <b>L</b> NKKAFQCFSCAVRKTEEEVQSS---SVDHVMVGVDAYLTL <b>I</b> S <b>F</b> CDQYLRE                                                                                                                                                                                                                | 3435        |
| OSTRICH      | EKVLG <b>L</b> NKKAFQCFSSAVRKSEEEVQSH---SMEHVDVAGVIDSYMT <b>L</b> V <b>G</b> FCDQHLRRE                                                                                                                                                                                                             | 3405        |
| TURTLE       | EKVIAG <b>L</b> NKKAFQYFSTAVRKAEEVQSH---SMEHVDLTGVIDAYM <b>L</b> V <b>F</b> CDKHLRKE                                                                                                                                                                                                               | 3444        |
| ALLIGATOR    | EKVIAS <b>L</b> NKQAFQYFSAVNRKAEEEMQSR---TMEHVNLTGVIDAYL <b>T</b> L <b>V</b> D <b>F</b> CDKHLHKE                                                                                                                                                                                                   | 3402        |
| SOFTCORAL    | DKILGH <b>L</b> TTKSFTTLQRAIKIAQTNNENN---QKNAESVRNLVTSMT <b>M</b> AN <b>F</b> CDRLLRMK                                                                                                                                                                                                             | 3441        |
| STONYCORAL   | KKVVS <b>D</b> LMTRSFVSLQSAIKAAKNAEGK-----CNTTQTSGTVDAMIAM <b>V</b> N <b>F</b> CDNCLRKK                                                                                                                                                                                                            | 3458        |
| ACORN_WORM   | ALIVN <b>G</b> LQNKAEHYFKKGVKLASDEEDA-----IDMDREGVIDAYV <b>S</b> M <b>A</b> T <b>F</b> CDKMLKQQ                                                                                                                                                                                                    | 3436        |
| LANCELET     | DQTISS <b>L</b> LQKGHACLQKAVKLASDEEKA---RQDTSLDKSGIVDAFMA <b>V</b> G <b>F</b> CDKILRHQ                                                                                                                                                                                                             | 3462        |
| SEA_URCHIN   | EKV <b>C</b> Q <b>S</b> L <b>F</b> M <b>K</b> S <b>K</b> Y <b>L</b> DDAVGTIKLDPASHLSSSAKREEQSMAKAHMA <b>L</b> V <b>S</b> FCDQLLRQQ                                                                                                                                                                 | 3463        |
| STARFISH     | EQIC <b>S</b> T <b>L</b> Y <b>S</b> KAYSELQAVSLADKDDA-----VTSQSERSMTEAYM <b>L</b> V <b>S</b> FCDRLRLK                                                                                                                                                                                              | 3472        |

**FAT**

|              |                                                                                                                                                                                                                                                      |             |
|--------------|------------------------------------------------------------------------------------------------------------------------------------------------------------------------------------------------------------------------------------------------------|-------------|
| TERMITE      | RE-----DNFGTDIVTSI <b>L</b> RAMRYGSK <b>D</b> AR <b>Q</b> L <b>F</b> P <b>R</b> L <b>L</b> Q <b>L</b> PGLDTS                                                                                                                                         | 3354        |
| SHRIMP       | KDH-----VDVSQYKSLMVSV <b>L</b> RAMANGSR <b>D</b> A <b>H</b> F <b>F</b> P <b>R</b> L <b>I</b> N <b>L</b> MNEDAS                                                                                                                                       | 3425        |
| SCORPION     | EEEEK <b>T</b> L <b>S</b> -----LSFETYPSVLTNS <b>L</b> N <b>A</b> L <b>K</b> NGNL <b>N</b> A <b>I</b> K <b>L</b> F <b>P</b> R <b>L</b> L <b>Q</b> I <b>I</b> EVYPD                                                                                    | 3460        |
| ALVINELLA    | ENDES <b>G</b> Q <b>K</b> -----ILPVLSSFPAAVTVSL <b>L</b> A <b>A</b> M <b>K</b> NNCS <b>E</b> AR <b>Q</b> R <b>F</b> P <b>R</b> L <b>L</b> Q <b>L</b> TEQYPE                                                                                          | 3397        |
| CAPITELLA    | ENDEIS <b>G</b> T-----KCESEDFPLALVTS <b>L</b> S <b>A</b> M <b>K</b> NS <b>S</b> K <b>D</b> AR <b>Q</b> L <b>F</b> P <b>R</b> L <b>L</b> Q <b>I</b> IERFPQ                                                                                            | 3438        |
| SPONGE       | DHDDE <b>G</b> S <b>T</b> -----GLDTKSFP <b>S</b> I <b>I</b> INHT <b>L</b> T <b>A</b> MS <b>L</b> G <b>S</b> S <b>K</b> ARE <b>L</b> F <b>P</b> R <b>L</b> L <b>Q</b> LVEAHPD                                                                         | 3500        |
| OYSTER       | EDDT <b>D</b> KES <b>L</b> N <b>L</b> S-----KECQKNFPETITVCL <b>L</b> N <b>A</b> M <b>K</b> LDS <b>M</b> EAR <b>Q</b> R <b>F</b> P <b>R</b> L <b>L</b> Q <b>L</b> VEMYPE                                                                              | 3450        |
| SNAIL        | EEND <b>G</b> L-----VA-----SESMEVFPATAVKCL <b>D</b> A <b>M</b> RAG <b>S</b> A <b>E</b> ALER <b>F</b> P <b>R</b> L <b>L</b> H <b>I</b> IEHYPD                                                                                                         | 3455        |
| TRICHOPLAX   | EDGRAN <b>Q</b> -----PKGL---IDTKIFPEV <b>I</b> RY <b>T</b> L <b>E</b> A <b>M</b> AYNS <b>M</b> DAR <b>Q</b> R <b>F</b> P <b>R</b> L <b>L</b> Q <b>I</b> VERNPN                                                                                       | 3469        |
| SEA_ANEMONE  | EDES <b>D</b> G <b>P</b> S <b>F</b> I <b>S</b> PFGLHYEFV <b>Q</b> R <b>F</b> PEFVV <b>R</b> Y <b>V</b> L <b>K</b> AMEHG <b>S</b> E <b>A</b> R <b>N</b> R <b>F</b> P <b>R</b> L <b>L</b> Q <b>I</b> VELYPH                                            | 3468        |
| PRIAPULA     | EDDG <b>T</b> TV-----LPTDGYAETVIT <b>S</b> L <b>R</b> A <b>M</b> ALGS <b>S</b> E <b>A</b> R <b>D</b> S <b>F</b> P <b>R</b> L <b>L</b> Q <b>L</b> VDLYPD                                                                                              | 3494        |
| ESHARK       | EESAT <b>A</b> IN-----FSEQQTFPACVVE <b>K</b> I <b>L</b> K <b>A</b> M <b>K</b> YNS <b>K</b> E <b>A</b> R <b>L</b> K <b>F</b> P <b>R</b> L <b>L</b> Q <b>I</b> VKLYSA                                                                                  | 3495        |
| STERLET      | EESAEV <b>S</b> T-----FSELPTFPVVVD <b>T</b> M <b>L</b> K <b>A</b> L <b>K</b> LNS <b>K</b> E <b>A</b> R <b>L</b> K <b>F</b> P <b>R</b> L <b>L</b> Q <b>I</b> IELYPA                                                                                   | 3499        |
| COELACANTH   | EESAEV <b>S</b> H-----FSELQTFPAVV <b>V</b> EN <b>L</b> R <b>A</b> L <b>K</b> LNS <b>R</b> E <b>A</b> R <b>L</b> K <b>F</b> P <b>R</b> L <b>L</b> Q <b>I</b> VELYPA                                                                                   | 3493        |
| <b>HUMAN</b> | <b>E</b> ENAS <b>V</b> I <b>D</b> -----S <b>A</b> EL <b>Q</b> A <b>Y</b> P <b>A</b> L <b>V</b> E <b>K</b> M <b>L</b> K <b>A</b> L <b>K</b> LNS <b>E</b> A <b>R</b> L <b>K</b> <b>F</b> P <b>R</b> L <b>L</b> Q <b>I</b> IERYPE                       | <b>3477</b> |
| CAECILIAN    | EDTT <b>A</b> VID-----HSHLQ <b>Q</b> FP <b>T</b> IVVE <b>K</b> M <b>I</b> K <b>S</b> L <b>K</b> LNS <b>K</b> DAR <b>L</b> K <b>F</b> P <b>R</b> L <b>L</b> Q <b>I</b> VELYPA                                                                         | 3496        |
| PLATYPUS     | EEG <b>T</b> S <b>V</b> I <b>D</b> -----AVVLQ <b>A</b> Y <b>P</b> A <b>L</b> VVE <b>K</b> M <b>K</b> A <b>L</b> K <b>L</b> NS <b>R</b> E <b>A</b> R <b>L</b> K <b>F</b> P <b>R</b> L <b>L</b> Q <b>I</b> IERYPE                                      | 3484        |
| CANARY       | EEGL <b>L</b> E <b>I</b> N-----TVDLQ <b>Q</b> FP <b>A</b> IVVE <b>K</b> M <b>I</b> K <b>A</b> L <b>K</b> LNS <b>R</b> E <b>A</b> R <b>L</b> R <b>F</b> P <b>R</b> L <b>L</b> Q <b>I</b> IERYPA                                                       | 3485        |
| OSTRICH      | EEGL <b>L</b> E <b>I</b> N-----TADLQ <b>L</b> FP <b>A</b> IVVE <b>K</b> M <b>I</b> K <b>A</b> L <b>K</b> LNS <b>R</b> E <b>A</b> R <b>L</b> R <b>F</b> P <b>R</b> L <b>L</b> Q <b>I</b> IERYPA                                                       | 3455        |
| TURTLE       | EEG <b>S</b> S <b>D</b> V <b>S</b> -----ALDLQ <b>T</b> FP <b>A</b> IVVE <b>K</b> M <b>I</b> K <b>A</b> L <b>K</b> LNS <b>R</b> DAR <b>L</b> K <b>F</b> P <b>R</b> L <b>L</b> Q <b>I</b> IERYPA                                                       | 3494        |
| ALLIGATOR    | REG <b>L</b> S <b>D</b> I <b>S</b> -----AVDLQ <b>T</b> FP <b>T</b> IVVE <b>K</b> M <b>I</b> K <b>A</b> L <b>K</b> LNS <b>R</b> E <b>A</b> R <b>L</b> K <b>F</b> P <b>R</b> L <b>L</b> Q <b>I</b> IERYPA                                              | 3452        |
| SOFTCORAL    | EED <b>S</b> E <b>Q</b> T <b>P</b> -----RLDM <b>K</b> LP <b>G</b> I <b>V</b> IR <b>F</b> V <b>L</b> K <b>S</b> M <b>A</b> F <b>S</b> A <b>E</b> AR <b>Q</b> K <b>F</b> P <b>R</b> L <b>L</b> Q <b>L</b> VELYPG                                       | 3491        |
| STONYCORAL   | EVS <b>V</b> AP <b>V</b> E-----VDTK <b>L</b> FP <b>G</b> IV <b>V</b> RY <b>M</b> L <b>K</b> S <b>M</b> C <b>Y</b> S <b>S</b> K <b>E</b> AR <b>Q</b> K <b>F</b> P <b>R</b> L <b>L</b> Q <b>I</b> VHKYPD                                               | 3507        |
| ACORN_WORM   | EQNE <b>D</b> G <b>A</b> V-----SRSS <b>K</b> SP <b>S</b> FR <b>S</b> V <b>V</b> F <b>H</b> L <b>L</b> K <b>A</b> L <b>K</b> LNS <b>V</b> E <b>A</b> I <b>Q</b> R <b>F</b> P <b>R</b> L <b>L</b> Q <b>I</b> VETYPD                                    | 3488        |
| LANCELET     | EDDE <b>E</b> G <b>T</b> E-----LSS <b>I</b> P <b>L</b> AA <b>A</b> V <b>S</b> N <b>L</b> Q <b>A</b> L <b>R</b> H <b>D</b> SP <b>E</b> AR <b>Q</b> R <b>F</b> P <b>R</b> L <b>L</b> Q <b>L</b> VEIYPD                                                 | 3512        |
| SEA_URCHIN   | DDDD <b>C</b> N <b>P</b> D-----Y <b>L</b> P <b>L</b> M <b>E</b> A <b>Y</b> P <b>S</b> T <b>V</b> V <b>N</b> S <b>T</b> L <b>Q</b> A <b>M</b> N <b>L</b> NS <b>P</b> E <b>A</b> R <b>Q</b> H <b>F</b> P <b>R</b> L <b>L</b> Q <b>L</b> VEKYPD         | 3514        |
| STARFISH     | ESDEV <b>P</b> M <b>T</b> -----Y <b>L</b> P <b>Q</b> T <b>D</b> N <b>F</b> S <b>Q</b> T <b>V</b> V <b>H</b> Y <b>T</b> L <b>K</b> A <b>M</b> H <b>Y</b> S <b>S</b> Q <b>E</b> AR <b>Q</b> R <b>F</b> P <b>R</b> L <b>L</b> Q <b>L</b> VEACP <b>D</b> | 3523        |

**FAT**

Supplementary Figure 2: CLUSTAL OMEGA DNA-PKcs METAZOA VERTEBRATE INVERTEBRATE

|              |                                                                       |             |
|--------------|-----------------------------------------------------------------------|-------------|
| TERMITE      | -LSELFHKESSAVVWVWFLGWVNLACLGTPVGPVLDHIILRLAETYPQSLIYAFQLSR            | 3413        |
| SHRIMP       | -LLSSFKEEYEKVPWVWFLWLSHLIYVDKVPGLAQPVVERLAAEYYPQAVIYYPFGISK           | 3484        |
| SCORPION     | -TIPEFIAKSKVVPWVWFLSWINQLLTLDDKPEATAVQYI IKEIGTNFPNALVYYPFKLSY        | 3519        |
| ALVINELLA    | -NMSLFIQKTSSVPTWVWFLGWISQITALLDDKPESPAIQDILKRLAVEYYPQAVVYYPFKMSC      | 3456        |
| CAPITELLA    | -TREVIRKSRDIPWVWFLGWVSVQICAILDDKPESSAIEHILLNADIYPNALVYYPFKLSN         | 3497        |
| SPONGE       | -TMDLMINKSSTIPWVWFLGWINQMIALVDKPEASRAVHDILIRIADTYYPQSLIYAFRMS         | 3559        |
| OYSTER       | -IRSTFVEKSGQVPCWVWFLWISQMMALLDDKPEGSTVHHILTELAETYPQAVVYYPFKLSS        | 3509        |
| SNAIL        | -TTDMFLKKSETIPWVWFLWISQMMALLDDKHQAHAVRPIILRIATEYYPQAVIYYPFHISQ        | 3514        |
| TRICHOPLAX   | -TIDGFMKSSAIWVWFLWISQMMALLDDKPEARAVQEIILFRIADEYYPQAVIYAFKVS           | 3528        |
| SEA_ANEMONE  | -TLDSFVKKVETVPCWVWFLGWINQMVALMDKKEARAVHGI VTEIAKNYPQALCYAFKVS         | 3527        |
| PRIAPULA     | -TLPLLTskVESVPCWVWFLWISQMVALLDDKREARAVQGILLSIAESYYPQAVIYPLNLSR        | 3553        |
| ESHARK       | ETLDDLKKEVSSVPCWVWFLGWINQMMAELDDKKEAVVQHIIEEIAADSYYPQAVIYPLMISS       | 3555        |
| STERLET      | ETLDDLMAKESVPCWVWFLWISQMMALLDDKKEAVAVQHVKEIAEYYPQAVIYPLFMISS          | 3559        |
| COELACANTH   | ETLDDLMAKMGSSVPCWVWFLWISQMMALLDDKKEAVAVQHIIEEIAEYYPQAVIYVNFMISS       | 3553        |
| <b>HUMAN</b> | <b>ETLSLMTKEISSVPCWVWFLWISQMMALLDDKQAVAVQHSVEEITDNYYPQAVIYVYPIISS</b> | <b>3537</b> |
| CAECILIAN    | ETLDMTREVSSVPCWVWFLWISQMMALLDDKKEAVAVQHIIEEIAADSYPEALVYYPFMISS        | 3556        |
| PLATYPUS     | ETLDMTQEISSIPWVWFLWISQMMALLDDKKEAVAVQHTIEEIAADNYYPQAVIYVYFMISS        | 3544        |
| CANARY       | ETLGLVTQELSSVPCWVWFLWISQMMALLDDKDEAVAVQHTVEEIANYPQAVIYVYFMISS         | 3545        |
| OSTRICH      | ETLGLVTRELSSVPCWVWFLWISQMMALLDDKDEAVAVQHTVEEIANYPQAVIYVYFMISS         | 3515        |
| TURTLE       | ETLGLMAREISSVPCWVWFLWISQMMALLDDKDEAVAVQHTVEEIANYPQAVIYVYFLISS         | 3554        |
| ALLIGATOR    | ETLSLMAQEISTVPCWVWFLWISQMMALLDDKDEAVAVHHTVEEIAHNYYPQAVIYVYFMISS       | 3512        |
| SOFTCORAL    | GDIEAFKRKSSDVPCWVWFLWISQMMALLDDKRESHAVQGIQLQDLAKHYYPQALLYPLKISA       | 3551        |
| STONYCORAL   | -TLEAFVKKAADVPCWVWFLGWINQMMAIDKPEGKAVHGI VSEIAKRYYPQALWYYPFKISS       | 3566        |
| ACORN_WORM   | -TMDTVELTSETPCWVWFLWIGQMLLALDDKVESISVQGILLEIANYPQALVYYPFKVSS          | 3547        |
| LANCELET     | -TMDLFIKVVSHVPSWVWFLWISQMMALLDDKPEAVAVHGI LTRIAEQYYPQALVYVPLKISS      | 3571        |
| SEA_URCHIN   | -TMQSLVKKASIIWVWFLWISQMMALLDDKPESLAVQGI LKAIKADYYPQALVYYPFKISS        | 3573        |
| STARFISH     | -TMQLMIKEVSDVPCWVWFLWISQMMALLDDKPEGPAVHGILTDIAYEYPQALCFYYPFKISS       | 3582        |

**FAT**

|              |                                                                     |             |
|--------------|---------------------------------------------------------------------|-------------|
| TERMITE      | EKYNLESGHV--SLKALVDQLASLLFTD---PVIDIFLRAFSCLGQPRKMLYHFVEKLEQ        | 3468        |
| SHRIMP       | QQYNFSS-HEGKLAKAMCDKVEALLSSH---KLLHQFVSAMSLMVVPSIACKDAIQNVLQ        | 3540        |
| SCORPION     | EMYKFPDTLQGENKEFVVKLSSLSQL---KLVDQFVNALDLSVPELLYKEYFKEILQ           | 3576        |
| ALVINELLA    | DGYKFSNDEQGKAKAVMIRVNEELSKN---PLIGKFINALEQLGQPDLSLFDWYQNLEW         | 3513        |
| CAPITELLA    | HNKFTSDAVSSKSKSVCDRLHQMLSKN---PLIDRLIFSLMMHEPAVLIKDWIMDMKN          | 3554        |
| SPONGE       | SGYKFGHNS--EGKELFEKLEKLSQ---QLMDEFIAALEQLNSPELAWKDWYDNEK            | 3613        |
| OYSTER       | EGYKFTNKD---EAFVTKLSTLQDE-QLPLVPKFISALEHMSQPDQIFKDWFDTRL            | 3564        |
| SNAIL        | ESFTFGSTAEDRRNKQIEELDALLSEE-RVPLVRTFISALEQFSQPVMQFDWSDRITK          | 3573        |
| TRICHOPLAX   | EQYTFEETSVGRQNKTAVKLSKLSQL---PLIESFVRALEQLSQPDLVFKDWVDEVKG          | 3584        |
| SEA_ANEMONE  | EQVFDSSPEGNTNRKAVERIRKLLS---PLMDSFIAALEQLHNPMAFKDWCDGEIK            | 3583        |
| PRIAPULA     | EHYFTVDAAGAEAEAYLHRLLATLSTCMDMSQLQLVVALEQLSSPHMLFSDVADARP           | 3613        |
| ESHARK       | ESYTFEQTARGNTNKEFVERIKNKLDKG---GMVEVFINSLEQLSNPDMFLKDWVDNFRS        | 3612        |
| STERLET      | ENYVFEDSATGHRNKEFVARLKSQLDKG---GVVKNFIDALQQLTNPMLFKDWVEDVKK         | 3616        |
| COELACANTH   | ESYFEESSPKGKKNKEFVARLKSQLDKG---AVVEDFIHALEQLTNSDMI FKDWVDVNRN       | 3610        |
| <b>HUMAN</b> | <b>ESYFPKDTSTGHKNKEFVARIKSKLDQG---GVIQDFINALDQLSNPELLFKDWSNDVRA</b> | <b>3594</b> |
| CAECILIAN    | ENYSFEDTATGHKNKEFMLRIKSKLDKG---GMVQDFIQSLEQLSNPDMIFKDWIEDMKN        | 3613        |
| PLATYPUS     | ENYSFKDTSAGHKNKEFVTRIKSKLDKG---GVVQDFIQALEQLSNPEMLFKDWVEDIKI        | 3601        |
| CANARY       | ESYCFKDTAAGCKNKEFVERIKNKLDRG---GVVQDFVHSLQLSNPVMI FKDWAEVDRN        | 3602        |
| OSTRICH      | ESYFPKDVTGCKNKEFVERIKKLDRG---GVVQDFVHSLQLSNPMMFLKDWTEVDRN           | 3572        |
| TURTLE       | ENYSFKDTATGHKNKEFVARIKSKLDRG---GVIQDFVHALEQLSNPVMLFKDWVEDVKN        | 3611        |
| ALLIGATOR    | ENYSFKDTATGHKNKEFVTRIKSKLDRG---GVIQDFVQALEQLSNPEMLFKDWVDVNRN        | 3569        |
| SOFTCORAL    | EQFKFGGSIEEQKNKFVESLNSLSF---PASDDLQALEQLTNPPEMVFKDWMDVVKV           | 3607        |
| STONYCORAL   | EHFVFENSEDGKANEAVKRLRSSLEH---PLLDDFIAALEMLTNPPEMVF RDWCEGPMK        | 3622        |
| ACORN_WORM   | ENFSFENTVTGKRNKEKVSQLAAILDNV---PLVMHFICALQQLTNPHEICKDFTDDVLV        | 3604        |
| LANCELET     | ENFEPEDSVTGRNRQEAVTSLKKTLVSIY--SLVDKLIIGGLEQLSHPDQLFKDWGDDADL       | 3629        |
| SEA_URCHIN   | EDFKLGDKSKEKQRKDAVKEIEDILSTV---PLVENLTLALQRLTHPGFIKDWISVIN-         | 3629        |
| STARFISH     | ESFTFDESNTGRKNASARKIGAILESI---PLLDDFICALQQLNPEFVFKDWADDVMK          | 3639        |

**FAT**

FRB 3582-3675

Supplementary Figure 2: CLUSTAL OMEGA DNA-PKcs METAZOA VERTEBRATE INVERTEBRATE

|              |                                                              |             |
|--------------|--------------------------------------------------------------|-------------|
| TERMITE      | LLN-----AKRPNCDLHMHYDTMMKELFPSSYKGIHG---AL-----FKDI          | 3507        |
| SHRIMP       | EKD-----KQKMEEGLSEIVSEFLKVQNRSSKGNAE-----EKGEA               | 3576        |
| SCORPION     | MKK-----DKGDKNEIVKLYKKLCHLELFNYNPRDKMK-----E                 | 3609        |
| ALVINELLA    | KECFSQ---PEK--NKTHILTMKYKMYDQLLATET-----NDK                  | 3546        |
| CAPITELLA    | AKGPGG---SSQSLSMAYVKERYQELYKELLCIESEDGSL-----Y-----SDSADCSM  | 3600        |
| SPONGE       | PLVGS---VTVPKRDKNAIKRVWEQMYSQLLETRSGGLGDK---SLYG-----GSPSLQK | 3661        |
| OYSTER       | KFM-----KMKPKKAMKEEYQIMYKKVLEFTEVGRGASQ---RSQTEETLSMVDK      | 3613        |
| SNAIL        | ILE-----KRP-AAEIKKKYKEIYDMLLEMPHKGEQSGTQ-----AQQTSTFGAVSM    | 3618        |
| TRICHOPLAX   | L-----KKSIGSIAESIRICYQKLRDGLLDVSNSESE-----AASLSTSGELIEF      | 3629        |
| SEA_ANEMONE  | QLL-----QTKNKAKEAFRSIYKQLFDSSVNRATDSSQ-----PAAEEM            | 3624        |
| PRIAPULA     | LLM-----TRRADPARFRKIYASLFDTRRSQEE-----PGGR                   | 3647        |
| ESHARK       | KLE-----KK-ENKTQLKNLYSEMYSNLANAG-----APGI                    | 3642        |
| STERLET      | ELE-----KPKTDKLLKNMYEEMYSALGNPR-----CQGI                     | 3647        |
| COELACANTH   | ELD-----KPQRNKANLKRMYEEMYANLGNLR-----APGL                    | 3641        |
| <b>HUMAN</b> | <b>ELA-----KTPVNKKNIEKMYERYMAYALGDPK-----APGL</b>            | <b>3625</b> |
| CAECILIAN    | ELA-----KSQRNKNNIKLYEEMYNLGNLK-----APGI                      | 3644        |
| PLATYPUS     | ELT-----KTPINKNNLKRMYEGMYKTLGNLK-----APGL                    | 3632        |
| CANARY       | ELS-----KPQRNKKLKEMYERYMKNLGNLE-----SPGL                     | 3633        |
| OSTRICH      | ELV-----KTQRNKNLQDMYERYMYRNLGNLE-----APGL                    | 3603        |
| TURTLE       | ELG-----KTQRNKNLKEMYEGMYRNLGDLQ-----APGL                     | 3642        |
| ALLIGATOR    | ELG-----KAQKNKALKEMYEGMYRNLGNLQ-----ASGL                     | 3600        |
| SOFTCORAL    | LLS-----TKGNAVKIRESYGEMSKLLLNVKKR-----GTNSDGLF               | 3644        |
| STONYCORAL   | QLLED---QIKRNDSQAVKQCFGAMFQLLMDCRKRTKS-----GSQTRGTES         | 3666        |
| ACORN_WORM   | PALRAR-----NPTAVKKAVERGLYTRVFDSCRQSSQD---SLF-SESDAVTQSLPF    | 3652        |
| LANCELET     | KRLKLVDPKRTKEDKVTIKRLYDEMYDSLDFRSASQDSSMSLFGSQSSDLESQSVGF    | 3689        |
| SEA_URCHIN   | SXM-----NSKERDHPAIKQEQYQQLYQQLFES-----GGR---QGGPSSSSQTVEP    | 3672        |
| STARFISH     | PLL-----NVAKRDKNKIRQACHEIYMNLINHRSTVTDGTAG---SSQDSQSSPSVGF   | 3689        |

**KINASE**

FRB 3582-3675

|              |                                                               |             |
|--------------|---------------------------------------------------------------|-------------|
| TERMITE      | QEYRKRLEKAES---NIKCG--NKKVL----KDICFIKEKLYI-----IQD           | 3545        |
| SHRIMP       | YTRQDRAKKQMAEAFTKAFGENLKKAKLSI-RDIQRELGSMGRVLQ-----LSPEEM     | 3628        |
| SCORPION     | RKLHLKVAKVCVSVVSEFGKDGKILSMPL-KEASVKYETLLKKITT-----MSE        | 3659        |
| ALVINELLA    | GPYRTRFAEKYRRDFNHAFGTGGKELQOFTY-AKFQEEGNKILQ--KI-----NNF      | 3594        |
| CAPITELLA    | GPYRSDFVKQFISQFDEYFGKMGSKLPLGTF-MKVLSWLSDKSEKVKK-----AFS      | 3650        |
| SPONGE       | GARQKTFQAQYAKNIEDKFGKGGAKIISMSG-TQLASAFNEVYNKMR-----LNK       | 3712        |
| OYSTER       | GKYPKFAERFKKDVDSFCFKNGEKILLDMSF-SKLAGAYKKVYKMDM-----FEVKEKN   | 3666        |
| SNAIL        | GEFHRRFQAEVFNEDNHFGVDGSKLVTMTA-KEFSGILRNLQ--AQ-----FEKHKAD    | 3669        |
| TRICHOPLAX   | GSHKRRFIQHFQKVIQYFGKDGSKLQSMKA-SDFEKIASRLIQEIS-----GKI        | 3678        |
| SEA_ANEMONE  | GPFRKFSKEHASRFENIFGKDGEKLVNMSL-KTAK-----L--KQ-----QMV         | 3665        |
| PRIAPULA     | GRYWSVFTRTWAREVEEKCGRDGSKLLAMAA-ADANQVLSALGKEMK-----TKA       | 3696        |
| ESHARK       | GAFFFFRVTFGKFKKIDQHFQKDGLLLLNMMNL-KAFNVAVGQIMET-----QK        | 3688        |
| STERLET      | GAFRKKFAQHFQKFDKTFGKGGAKLFDMKH-DAFRKASDSLWGSISE-----EQKK      | 3698        |
| COELACANTH   | GSFRSNFVKAYGKEFERVYGRGKELLDKMS-SDFFKVSDQLLTSMR-----KF         | 3689        |
| <b>HUMAN</b> | <b>GAFRRFIQTFGKFEFDKHFGRGGSKLLRMKL-SDFNDITNMLLLKMN-----KD</b> | <b>3673</b> |
| CAECILIAN    | GEFRFRFVQAHAKDLDTHFQKGGSKLVDMKE-DAFAKTAYSLFNNMR-----GS        | 3692        |
| PLATYPUS     | GAFRKRFIQAFGNFDDHFFGRGGSKLLQMKL-SDFTSITNSLNSKMK-----ES        | 3680        |
| CANARY       | GMMRKRFIQAFGKDLDDHFFGRGGSELLNMKT-SDFDAIANSLSKMI-----KT        | 3681        |
| OSTRICH      | GLLRRRFIQAFGKDFDHFQKRGSKLLNMKA-SDFDAITSALLSKMT-----KS         | 3651        |
| TURTLE       | GLFRKRFVQTFGKDFSSHFGKGGSKLLDMKA-DDFNRIAFSLLSKMK-----D-        | 3689        |
| ALLIGATOR    | GLFRFRFIQAYGKEFDTFQFGKGGSKLLDMKD-NEFKIVNALLAKMR-----DG        | 3648        |
| SOFTCORAL    | GSIRRFQAEFSGNVVVCVEDGSKIIDMSI-KAFESAMKTTNEKM-----KA           | 3691        |
| STONYCORAL   | GPFRKFAQEFANVQRIFGKEGEKLVGVKM-TDFSKWCRDIQQKMKVFK-----RNR      | 3717        |
| ACORN_WORM   | GPFPKQKFAQFVQKQKRFGERGCKILSMQHQKFMNFRNEVDQLMR-----KKK         | 3702        |
| LANCELET     | GPFRFRFAQQFAKECEKMFQKDGSRILDMKE-KEFMKLSGLQNMMDGFYRKAFFPREKAN  | 3748        |
| SEA_URCHIN   | GPYWKKFGREWQKRFDSFQDGSKLAAMDY-KTWSKLRQDI-----CAKMT-----G      | 3720        |
| STARFISH     | GNFRFRFAQEQKKEFAAFQKDGTKVIDMQL-KTFSEHYGKL-----YKEMAAK---R     | 3738        |

**KINASE**

FRB 3582-3675

Supplementary Figure 2: CLUSTAL OMEGA DNA-PKcs METAZOA VERTEBRATE INVERTEBRATE

|              |                                                                     |             |
|--------------|---------------------------------------------------------------------|-------------|
| TERMITE      | IKPPVQLKDYSPWLSFQGGKHCFLLELEIPGQYTGESKPLIQHHVKIAGFKQTVVPMKTL        | 3605        |
| SHRIMP       | RKLPRQLKAYSFWLANFQASKY-SEVLELPGQYTGMSKPLPEYHVKISSFDENVLLMSSM        | 3687        |
| SCORPION     | MNKEAKLRDFSDWLSFHSIKY-SELEIPGQYTGKRKPIPEHHVKICNFQDKVDLSSSL          | 3718        |
| ALVINELLA    | EKPPEDIAEYSEWLANFQGCEF-DQEIEIPGQYIGKAKPLPQYHTKISSFHSVVKTLQSM        | 3653        |
| CAPITELLA    | NKQPRKLKEYSQWLAEFQAGNH-EASLEIPGQYTGVEVCPLEHYHAKISSFDSQVTVLRSL       | 3709        |
| SPONGE       | FSSSALLKDYSPWLDTFRQEDY-LQVIEVPGLYDGRSKPLPEYHAKITRFDAKVLILSSSL       | 3771        |
| OYSTER       | LKPPANLKDYCQWLANFNPSIQ-GKDLIEIPGQYDGVKPKMPEYHVKVVGFDQRVKVMTSI       | 3725        |
| SNAIL        | LTPPTNIGKYCSWMANFNPNHE-SRELEIPGQYDGLRKPMPYHVVKVAGFDERVLMVSSSL       | 3728        |
| TRICHOPLAX   | KNRPENLKEYCPWLSNFQAANF-TYSIEVPGQYTGGRSKPLPEYHLKIASFGERLLVLKSI       | 3737        |
| SEA_ANEMONE  | SKPPGNLKEYSPWLTNFQADSH-AQKLEVPQYTGQSKMPPEYHVNIAGFDEKVLVLASI         | 3724        |
| PRIAPULA     | ADSPGNLKEYSTWLTDFHSSPA-TCQIEIPGQYRGRSKMPPEYHVKIAGFDEKVLVMKSL        | 3755        |
| ESHARK       | PEPPGNLKEYSPWMSNFKPQFL-GNELEIPGQYDGGKCKPLPEYHAKITGFDERVKVMSI        | 3747        |
| STERLET      | EKEPGNLKEYSPWMSNFKPEVL-RNELEIPGQYDGGKCKPLPEYHAKITGFDERIKVMSM        | 3757        |
| COELACANTH   | QREPGNLKEYSPWMSQFPEFL-RNELEIPGQYDGGKSKMPPEYHAKITGFDERIKVMAI         | 3748        |
| <b>HUMAN</b> | <b>SKPPGNLKECSPWMSDFKVEFL-RNELEIPGQYDGRGKPLPEYHVRIAGFDERVTVMASL</b> | <b>3732</b> |
| CAECILIAN    | QPEPGNLKEYSPWMSNFKPEFL-RHELEIPGQYNGRSKPLPEYHVKISGFNERVKVMSI         | 3751        |
| PLATYPUS     | SKPPGNLKECSPWLSDFRVEFL-RSELEIPGQYDGGKPLPEYHAKITGFDERVKVMAI          | 3739        |
| CANARY       | HKEPGNLKECSPWMSDFKAEFL-RSELEVPQYDGGKPLPEYHAKISGFDERISVMESL          | 3740        |
| OSTRICH      | HKEPGNLKECSPWMSDFKAEFL-RNEIEVPGQYDGGKPLPEYHVRIISGFDERIKVMESM        | 3710        |
| TURTLE       | QKEPGNLKECSPWMSDFKAEFL-RNELEIPGQYDGGKSKPLPEYHAKISGFDERIKVMESI       | 3748        |
| ALLIGATOR    | QKEPGNLKEYSPWLSDFKAEFW-RNELEIPGQYDGGKPLPEYHAKISGFDERIKVMESL         | 3707        |
| SOFTCORAL    | KKFVGNLKDYSPWLANFQTSQE-TIQLEIPGQYDGGKSKPLPEYHVKIVAGFGEKVKAMSSL      | 3750        |
| STONYCORAL   | TPPPGNLKEYSPWLSRFQSNF-THTLEIPGQYKGGKTKPLPEYHVKIVGFDEKVVQLPSI        | 3776        |
| ACORN_WORM   | MSAPGNLREYSPWLSDFQPINY-EKLEIPGQYKGRSKPLPEYHVKIAGFDEKVKVMSL          | 3761        |
| LANCELET     | CYAPGLLKDYCPWLSDFNPLDY-DRELEIPGQYTGKVKPLMQYHAKIAGFDQRVKVMSL         | 3807        |
| SEA_URCHIN   | KDDPGNLKEYSPWTFATQTLR--GDELEIPGQYDGGKSKPLPAYHVKIAGFDETVLTLSSSL      | 3778        |
| STARFISH     | RDPPGNLKEYSTWFSDFQQLSY-DRELEIPGQYGGKSKPLPEYHVKIAGFDEQVKVLSM         | 3797        |
|              | : . *: * . :*: * * * *: * : * : * : : :                             |             |

**KINASE**

|              |                                                                  |             |
|--------------|------------------------------------------------------------------|-------------|
| TERMITE      | RLPLQVTIFGSDAKEHQYLKVFGEGLRQDQRIEQLFNLMNKILDQDPTCRHRN--LSITT     | 3663        |
| SHRIMP       | RVPMRIIRGDDKEEYKFLVKGEDLRDQRMQMFVTLMNSIYARSPLCTKASSVPSLDT        | 3747        |
| SCORPION     | TKPRCLTIRGNDQKDYKFLVKSGEDLRQDSRIEQLFDVMNDIYQCNAIQFNK--LKLET      | 3776        |
| ALVINELLA    | RKPKRIVIRGNDQKEYPFLVKGEDLRDQRIQQLFGLMNEIFSHASKCHQYN--LQLRT       | 3711        |
| CAPITELLA    | RMPKSIVIRGNDKEEYKFLVKGEDLRDQRVQVFNLMNEIYANDANCHARR--LQLKT        | 3767        |
| SPONGE       | RKPKRLTIIGDDTREYMFVKGEDLRDQRIEQLFETMNVKLSDDPICSQRR--LNLRT        | 3829        |
| OYSTER       | RKPKRITIRGNDEREYHYLVKGGEDLRDQRIEQLFVLMNQALSDPACQQRN--LKIKT       | 3783        |
| SNAIL        | RRPKRITIRGNDKDYHYLVKGGEDLRDQRIEQLFVLMNVKLEKDPVCKARR--LVLKT       | 3786        |
| TRICHOPLAX   | RKPLRLTVQGDDEEYKFLVKGEDLRDQRIEQLFCVMNEILAQDSICSQQD--LRLRT        | 3795        |
| SEA_ANEMONE  | RKPKRVTIRGDDDERDHMFLVKGEDLRDQRIEQLFCMMNEVMSDPAACSQRN--LRLRT      | 3782        |
| PRIAPULA     | RLPKRITIRGHDENEYMFLVKGEDLRDQRIEQLFDIMNRSLDADAACRQRA--LRLRT       | 3813        |
| ESHARK       | RKPKRLIRGNDKEEYKFLVKGEDLRDQRIEQLFEVMNIIILSRDAACSQRS--LQLKT       | 3805        |
| STERLET      | RKPKRLIMRNDEREYKFLVKGEDLRDQRIEQLFDVMNIIILSRDATACSQRN--LQLKT      | 3815        |
| COELACANTH   | RKPKRLIQGNDEREHPFLVKGEDLRDQRIEQLFEVMNIIILSQDAACSQRN--LQLKT       | 3806        |
| <b>HUMAN</b> | <b>RRPKRIIRGHDEREHPFLVKGEDLRDQRIEQLFQVMNGILAQDSACSQRA--LQLRT</b> | <b>3790</b> |
| CAECILIAN    | RKPKRIIILGNDEEYKFLVKGEDLRDQRIQQLFDVMNIIILSQDAACSQRN--MQIKT       | 3809        |
| PLATYPUS     | RKPKRIIRGHDEREYKFLVKGEDLRDQRIEQLFDIMNIIILSQDAACSQRN--MQLKT       | 3797        |
| CANARY       | RKPKRITIRGSDEREYKFLVKGEDLRDQRIEQLFDVMNIIILSQDATACSQRN--MQLKT     | 3798        |
| OSTRICH      | RKPKRITIRGSDEREYKFLVKGEDLRDQRIEQLFDVMNIIILSQDAACSQRN--MQLKT      | 3768        |
| TURTLE       | RKPKRINIRGSDEREHPFLVKGEDLRDQRIEQLFDVMNIIILSQDAACSQRN--MQIKT      | 3806        |
| ALLIGATOR    | RKPKRIIRGSDEREYKFLVKGEDLRDQRIEQLFDVMNIIILSQDASACSQRN--MQIKT      | 3765        |
| SOFTCORAL    | RAPKRITILGNDEREHTFLVKGEDLRDQRIQQLFGLMNDVMRDDAACQQRN--LSLKT       | 3808        |
| STONYCORAL   | RKPKCLIRGDDKEDHMFLVKGEDLRDQRIEQLFGLMNDIMANDSACSQRG--LRLRT        | 3834        |
| ACORN_WORM   | RKPKRLTIRGNDKEHNFVKGEDLRDQRIEQLFGIMNDILALDAACSQRS--LKLVT         | 3819        |
| LANCELET     | RKPKRVTIRGDDDERDHMFLVKGEDLRDQRIQQLFDIMNDILTLPACSQRQ--LRIRT       | 3865        |
| SEA_URCHIN   | RKPKCITIRGNDMDYKFLVKGEDLRDQRIEQLFCIMNSILAQDAACSQRG--LTLTT        | 3836        |
| STARFISH     | RKPKRIVIRGNDHEHYSFLVKGEDLRDQRIEQLFRIMNSILEQDSTCSQQG--LQLVT       | 3855        |
|              | * : : * * : : : * * * * * * * : : : : * * : *                    |             |

**KINASE**



Supplementary Figure 2: CLUSTAL OMEGA DNA-PKcs METAZOA VERTEBRATE INVERTEBRATE

|              |                                                                     |             |
|--------------|---------------------------------------------------------------------|-------------|
| TERMITE      | YQVVPPLSSHLGIIQWVDGTEALKGLMLGVLDKNEKESYK-----KSCEEHCKWISKPCN        | 3717        |
| SHRIMP       | YQVPIPLSRVGIQWVDSTQPLKDFINDSYRENETKCYGE-----ARALY-----              | 3792        |
| SCORPION     | YQVIPLETTKIGLIEWVDNTNVLGSLFKDAMDKEKESFR----ESDPKMTFYKFLLSKTN        | 3832        |
| ALVINELLA    | YQVIPMTTRIGLIEWMKNKTKLKEILYETFTKEEK---EFFISPNGPRYDYAKWMGVPIR        | 3768        |
| CAPITELLA    | FQVIPMTPRLGMIEWLKNNSCTLKDFLRQGCSDVSWEQIQNKLPNPNANLLCQWIGDSSN        | 3827        |
| SPONGE       | YSVIPVTPRVGLIEWVRNMTPLKDFIQLSDPEKKSIPA-----ASKMNQKWLEQKFG           | 3881        |
| OYSTER       | YQVIPMTRVGLIEWMNDTIPLKEFLICNLTEQEAKFVS-----GNLHNSWIMKLSK            | 3835        |
| SNAIL        | YQVIPMNTRVGLIEWMSNTIPLKEFLNAMTEKERTAYF---GENGPSQLHYKWLPLKLPK        | 3843        |
| TRICHOPLAX   | YQVIPITQRLGLIEWMKNITLKEFLVTDAMEDHEKQHYL--SSQNSPHQLYSKWLKGFSG        | 3853        |
| SEA_ANEMONE  | YQVIPMTQRVGLIEWLKNKTKPLKELHIAATESEKQAMV--VRRKTKNMLDL-----           | 3832        |
| PRIAPULA     | YAVVPMSTRGLLEWVPRTKPLKQLLQEAMTQQQYDAYY--SYSMNPVEHFNKWAATALT         | 3871        |
| ESHARK       | YQVIPMSTRGLIEWLDNTCTLKDFLSSNITTEETQSRRQ----QEVLPKYREWLOKMG          | 3860        |
| STERLET      | YQVIPMTARIGLIEWLENTCTLKEFLFDRMTEEERKHCK-----RPAESYMEWLSKVAG         | 3869        |
| COELACANTH   | YQVIPMTRIGLIEWLENTCTLKEFLSNAMTEEERTNYETLSPKKGPKAQNEWLTKMAG          | 3866        |
| <b>HUMAN</b> | <b>YSVVPMTSRLGLIEWLENTVTLKDLLLNTMSQEEKAAYL--SDPRAPPCEYKDWLTKMSG</b> | <b>3848</b> |
| CAECILIAN    | YQVIPMTRRLGLIEWLEATNTLKDFLYNSMSEAEQENCS--S---TTKHYKDWIQKMG          | 3863        |
| PLATYPUS     | YQVIPMTRRLGLIEWLENTCTLKEFLKSMSEGEKAAYE--SNPKGPVHEYSWLYKMSK          | 3855        |
| CANARY       | YQVIPMTRRLGLIKWLENTCTLKEFLKNSMSEEDINYY---SPRGPRTATYSEWLSRMGG        | 3855        |
| OSTRICH      | YQVIPMTRRLGLIKWLENTCTLKEFLKNSMSEEDFNYS---SKKGPRTATYNEWLSKMG         | 3825        |
| TURTLE       | YKVIPMTRRLGLIEWLENTCTLKNFLMESMSEEEKDDYH---SRKGPRTATYSDWLSKMG        | 3863        |
| ALLIGATOR    | YQVIPMTRRLGLIEWLPNTCTLKNFLHSNMSEEEKADYC---SEKGPLFAYNEWLSKMG         | 3822        |
| SOFTCORAL    | YKVIPMTRIGLIEWLENTVTLKEFLRNGLSETENETFD--TI----GYKHNKWIVEKFP         | 3862        |
| STONYCORAL   | YQVIPMTPRVGLIEWMNNKTKPLKGVLSAMTKAENDHYI--GP-NGAGACYRNWIDKFKG        | 3891        |
| ACORN_WORM   | YEVIPMTPRIGLIEWVDHCLPLKVFVSEAMTKNERSHYA--NT---RLDHTTWVDMVK          | 3873        |
| LANCELET     | YQVIPMTRVGLIEWMONTTPLAGFLENAMTTREQEAFV--HQ-RLPLIDFDAYVHRLGG         | 3922        |
| SEA_URCHIN   | YQVVPMTPRGLIEWVKRTTTLKDFITRSMTEAEHKVYT--SRTTGPVALFTTWLQKFCQ         | 3894        |
| STARFISH     | YEVIPMTPRLGMIEWAQNTTTLKEFLHLAMTEQEGNAYN--SR-HGPRYQHSEWVDKYAK        | 3912        |
|              | : *:*. :*:*** * ..                                                  |             |

**KINASE**

|              |                                                                   |             |
|--------------|-------------------------------------------------------------------|-------------|
| TERMITE      | P-----QCSFYEKYGEAHMKYSPEETSAEFRKKNVMIIPWDIRRALQRLSVSPESYFILR      | 3772        |
| SHRIMP       | -----GKNENYTVAKKAKRDRVIKAYEEVVKIPWDLRRGLVVRMSSTEGFFSLR            | 3843        |
| SCORPION     | S-----RDKSIPLLYENIYKI--ADTEVNKKFTECINMIIPWDLRRAFLKFSSSLAEFVILR    | 3887        |
| ALVINELLA    | D-----IGKPKPYQVSYSKNTRSDAITNFKRENLPVWNLARRAYQTMVAVSPAEAFVFLK      | 3822        |
| CAPITELLA    | T-----RQMIENYRKYQKYSRNETLNAFKKREAMVPWDLRKSQKCLASSPESYFVLR         | 3881        |
| SPONGE       | G-----SNYVNWYEMKYLKKADEVKKEYRRIVSAVPWDLRRSLISLASTSEFLLLR          | 3935        |
| OYSTER       | D-----PRDVQQGYMQMYLKYNMTETRRELQKKNIPWDLRRAFHKMSVSPAEFHVLR         | 3890        |
| SNAIL        | K-----TDWGLIYGQVYQNYSKTETMKEFRIKESKVPWDLRRAQLHLSVSPAEFHFVR        | 3897        |
| TRICHOPLAX   | A-----GGPVYMYQSMYRKAKRSEVENHFKFRENVPWDLRRRGFVALSASSAEYMLLR        | 3907        |
| SEA_ANEMONE  | -----TLRILFDIIISREANRDTSESEFKKQAQVPWDLRRRAFQQLAASPEAYLTLR         | 3885        |
| PRIAPULA     | ASESKRAASHVKLYARTFVQCSKSDTVRSFRERESMVPDRLRQAFRLRSASPFAFLALR       | 3931        |
| ESHARK       | R-----KDMFLRYPYMYLKSARTEVTAFRTHEQAI PGDLRRRAFIKMSVTPAEFLALR       | 3914        |
| STERLET      | K-----EKGI AQYITMYKTAKRTEVTRAFRNVHEHVPEDLLRRAFMKMSVTPAEFLSLR      | 3923        |
| COELACANTH   | G-----SVGPQRYGSMYKRASRTEVMAFRSVESLVSRLRRRAFTKMSVSPAEFLTLR         | 3920        |
| <b>HUMAN</b> | <b>K-----HDVGAYMLMYKGANRTEVTVSFRKRESKVPADLLKRAFVRMSVSPAEFLALR</b> | <b>3901</b> |
| CAECILIAN    | C-----DNISRYEYMYRRASYTEVVAFKARENLPVGDLLRRRAFTKMSVTPAEFLTLR        | 3916        |
| PLATYPUS     | K-----QDFGAYMLMYKHASRTEAVTAFNRNENRVPGDLLRRRAFVKMSVTRPEAFALR       | 3908        |
| CANARY       | K-----AQGISRYHAMRYNASRTEAVTSFKSRESSVPEDLLRRRAFVKMSVSPAEFLALR      | 3909        |
| OSTRICH      | K-----AQGVPRYHVMYRNANRTEVTVMSFKSRESSVPEDLLRRRAFVKMSVSPAEFLSLR     | 3879        |
| TURTLE       | K-----ENGIARYKTMYSRANRTEVTVLSFRNRETSVPGDLLRRRAFVKMSVSPAEFLSLR     | 3917        |
| ALLIGATOR    | G-----KIEDFARYMPMYKRASRTEVTVMSFRNRENVPEDLLRRRAFVKMSVSPAEFLSLR     | 3877        |
| SOFTCORAL    | V---NGNKHIINNYYPMFKKASREVIERKPRELQNLMPHDALRRSFMRLASSPFAFLTLR      | 3919        |
| STONYCORAL   | D-----PRNPSRFYGEFMFKKANRTEVTSFTQKQALVPWDLRRRAFQLAVSPAEFFILR       | 3946        |
| ACORN_WORM   | HV---GDRTSHCVRYGELYKVASRTEILKKFQDLHTQVPWDALRRAFQRLSSSPFAFLTLR     | 3931        |
| LANCELET     | TV---K-NDPWGKVGSLYQKASRTDVTLAFRQVQSKVTWIMRRGYLQMSVSPAEFLTLR       | 3979        |
| SEA_URCHIN   | T---D-G-NITKLFTEAYKKANETETIKAFREREAKLPWDLRRRFQMSVSPAEFLTLR        | 3949        |
| STARFISH     | G---N-QSNHGVRVYGAVYRHANYTDTVKCFRSWEALVPWDLRRRAFIQLSASPFAFLTLR     | 3968        |
|              | : : :.. :. : *.: *                                                |             |

**KINASE**



Supplementary Figure 2: CLUSTAL OMEGA DNA-PKcs METAZOA VERTEBRATE INVERTEBRATE

|             |                                                                |      |
|-------------|----------------------------------------------------------------|------|
| TERMITE     | QSFACSYAVLCTIAHWLLGIGDRHLSNLLVSVKDGRCVGIIDFGSAFGTAT--QFLPVPELM | 3830 |
| SHRIMP      | SAFAVSYAALCISQWLLGIGDRHCSNSLVSLKTGRVIGIDFGHHFESAV--QFLPVPELM   | 3901 |
| SCORPION    | YNFITSHAVLCISQWLLGIGDRHTGNFLVSTTTGIEVGIIDFGHAFGTAT--QFLPIPELV  | 3945 |
| ALVINELLA   | TNFTTSHAQLCVCHYILGIGDRHLSNFMVDLQSGRMIGIDFGYAFGSAT--QFLPIPELM   | 3880 |
| CAPITELLA   | GNCATSHALNCISAYIMGIGDRHLSNHMVDLNGKMIADFGHAFGSAT--QFLDIPELI     | 3939 |
| SPONGE      | CTFIQSLSVINICQYILGIGDRHLSNFMVDMETGQLVGIIDFGHAFHSAT--QFLPLPELM  | 3993 |
| OYSTER      | CKCASTHALISICQYVLLGIGDRHLSNFMINLKNEMVGIIDFGHAFGSAT--QFLPIPELI  | 3948 |
| SNAIL       | CEMLTSHAVLCICHYLLGIGDRHLSNFMVNGRTGHHVGIIDFGHAFGSAT--QFIPVPELM  | 3955 |
| TRICHOPLAX  | SHFARTHATVSIICHYLLGIGDRHLSNFMIDRLTGGMIGIDFGHAFGSAT--QFLPLPELM  | 3965 |
| SEA_ANEMONE | THFARTHACICICQYVLLGIGDRHLSNFLVDMRTGGLIGIDFGHSFGSAT--QFLPVPELV  | 3943 |
| PRIAPULA    | THFIKSHATLSVCHYVVGVDGRHLSNFMVSEQEDGGMVGIIDFGHAFGHSHPRCCLPIPELM | 3991 |
| ESHARK      | SHFASSHALMCISHWILGIGDRHLSNFMVNLETGGMVGIDFGHAFGSAT--QFLPVPELM   | 3972 |
| STERLET     | SHFTCSHALMCVSHWILGIGDRHLSNFMINMETGGMVGIDFGHAFGSAT--QFLPVPELM   | 3981 |
| COELACANTH  | SHFASSHALMCISHWILGIGDRHLSNFMINMETGGMVGIDFGHAFGSAT--QFLPVPELM   | 3978 |
| HUMAN       | SHFASSHALICISHWILGIGDRHLNFMVAMETGGVIGIDFGHAFGSAT--QFLPVPELM    | 3959 |
| CAECILIAN   | SHFASSHALICISHWILGIGDRHLSNFMINMETGGMVGIDFGHAFGSAT--QFLPVPELM   | 3974 |
| PLATYPUS    | SHFARSHALLCVSHWILGIGDRHLSNFMINLETGGMVGIDFGHAFGSAT--QFLPVPELM   | 3966 |
| CANARY      | SHFASSHALMCISHWILGIGDRHLSNFMINKETGGMVGIDFGYAFGAAT--QFLSVPELM   | 3967 |
| OSTRICH     | SHFASSHALMCISHWILGIGDRHLSNFMINKETGGMVGIDFGHAFGSAT--QFLPVPELM   | 3937 |
| TURTLE      | SHFASSHALMCISHWILGIGDRHLSNFMINMETGGMVGIDFGHAFGSAT--QFLQVPELM   | 3975 |
| ALLIGATOR   | SHFTSSHALICISHWILGIGDRHLSNFMINTETGGIIGIDFGYAFGSAT--QMLPVPELM   | 3935 |
| SOFTCORAL   | AYFARTYGCMTICHYILGIGDRHLSNSMVDLQGRVIGIDFGHAFGSAT--QFLPLPELM    | 3977 |
| STONYCORAL  | SHFASSHACLICQYILGIGDRHLSNFLVDMETGGMIGIDFGHAFGSAT--QFQPLPELM    | 4004 |
| ACORN_WORM  | GHFATSHALLCICQYILGIGDRHLSNFMISLDTGAMVGIDFGHAFGSAT--ELLPVPELM   | 3989 |
| LANCELET    | SHFTTTHATLCAQYVLLGIGDRHLGNFMIDLESGGMVGIDFGHAFGSAT--QHLPVPELM   | 4037 |
| SEA_URCHIN  | AHFARSHAVLCICQYILGIGDRHLSNFLVSLKETGGMVGIDFGHSFGSAT--QFLPIPELI  | 4007 |
| STARFISH    | SHFARSHAVICICQYILGIGDRHLSNFLISLKTGGMIGIDFGHAFGSAT--QFLPVPELM   | 4026 |

. . . : : : : : \* \* \* \* \* . \* : : \* : . \* \* \* \* \* \* : : : \* \* \* :

**KINASE**

**G(I)GDRHXXN IDFG T3950**

Supplementary Figure 2: CLUSTAL OMEGA DNA-PKcs METAZOA VERTEBRATE INVERTEBRATE

|              |                                                                    |             |
|--------------|--------------------------------------------------------------------|-------------|
| TERMITE      | PFRLTPHIVSLLQPLE--ETGLFRETMIHCLRTRLRNNYDMLLATMEVVFVQEPSIDWLEFA     | 3888        |
| SHRIMP       | PFRLSPQIVNVFQPIG--QVGLMKEIMVSALGALQESRHVLTAVLEAFVKEPTKDWLDFV       | 3959        |
| SCORPION     | PFRLTNQYLNLMPLK--EKGVIEATMISALSALRDNADILLNTMDIFIKEPTVNWQENA        | 4003        |
| ALVINELLA    | PFRLTCQLRNLMPLR--EKGLFESTMIHVLRALRDNQDI IINTMDVFIKEPSLDWKQNA       | 3938        |
| CAPITELLA    | PFRLTRQLRNLLLPLR--EKGVIEGTMVHSLRALRQHKQELISTMDVFIKEPSLDWQNA        | 3997        |
| SPONGE       | PFRLTPQFVNLLLPHK--VSGQLRSCMIHTLRALRHSPDLLNTMDVFIKEPSLEWESNA        | 4051        |
| OYSTER       | PFRLTRQLRNLMPLQ--VHGLMESTMIHTLRALRNNCDLLNTMDIFVKEPSVDLWNA          | 4006        |
| SNAIL        | VFRLTRQIVNLGLPFK--VKGLLENTMIHVLHALRQNHDLNLLSTMDVVFVKEVSLDWLQFA     | 4013        |
| TRICHOPLAX   | PFRLTRQMLNLMPLR--ENGQLKCSMVHTLRALRNKPDLLVNTMDVFIKEPSLDWQNA         | 4023        |
| SEA_ANEMONE  | PFRLTRQFTNLLLPLK--ESGLVRNTMIHVMRALRGNHELLNNTMDVVFVKEPSLDWQNA       | 4001        |
| PRIAPULA     | PVRLTRQFLQLLLPHQQRRLLYQTMVHTLRALRDNHRLNLLNTLDVFIKEPSIDWKATA        | 4051        |
| ESHARK       | PFRLTRQILNLMPLK--ESGLIRSIMVHGLRALRDPDLLSTMDIFVKEPSLDWKNLE          | 4030        |
| STERLET      | PFRLTRQFLNLMPLR--ESGLIYSVMVHSLRAYRADPDLLINTMDVVFVKEPSLDWKNFE       | 4039        |
| COELACANTH   | PFRLTSQFLNLMPLK--EQGLLYSVMVHALRAYRANPDLLNNTMDVVFVKEPSLDWKNFE       | 4036        |
| <b>HUMAN</b> | <b>PFRLTRQFINLMPLK--ETGLMYSIMVHALRAYRSDPGLLNTMDVVFVKEPSFDWKNFE</b> | <b>4017</b> |
| CAECILIAN    | PFRLTRQFVQMLPMK--ESGLIESVMVHALRAYRTPDLLITMDVVFVKEPCLDWNFM          | 4032        |
| PLATYPUS     | PFRLTRQILNLMSPMK--ESGLVYSVMVHALHAFRTDPDLLNTMDVVFVKEPSLDWKNFE       | 4024        |
| CANARY       | PFRLTRQFVNLMMPVK--EWGLIYSVMVHALRAYRSDPDLISTMDVVFVKEPSLDWKNFE       | 4025        |
| OSTRICH      | PFRLTRQFVNLMMPVK--EWGLIYSVMVHALRAYRADPDLLISTMDVVFVKEPSLDWKNFE      | 3995        |
| TURTLE       | PFRLTRQFINLMPLK--ESGLIYSVMVHSLRAYRTEPDLLVSTMDVVFVKEPSLDWQNA        | 4033        |
| ALLIGATOR    | PFRLTRQFINLMPLK--ESGLIYSIMTHALRAYRKDPDLLINTMDVVFVKEPSLDWKNFE       | 3993        |
| SOFTCORAL    | PFRLTRQICNMEPLR--VSGQLQSTMVYTRALRNNHEILLNTMDVVFVKEPSLDWQNA         | 4035        |
| STONYCORAL   | PFRLTQQFVNLMPLK--KSGTLQSVMIHTLRALRNSHDLNLLNTMDVFIQEPSLDWQVYA       | 4062        |
| ACORN_WORM   | PIRLTRQIVNLMPLK--EDGLILSTMVHGLRALRNNPDLLNNTMDVVFVKEPHLDWQKRA       | 4047        |
| LANCELET     | PFRLTRQMLNLLLPLK--ESGLLQSTMVHVLRALRSPNVLLINTMDVFIKEPHLDWKNFA       | 4095        |
| SEA_URCHIN   | PFRLTRQFINLMPLK--IDGVLQSTMVHTLRALRQNHELLVNTMDVVFVKEPSLDWKNFA       | 4065        |
| STARFISH     | PFRLTRQIVNLMPLK--KEGILQSSMVHTLRALRQNHELLINTMDVFIKEPSLDWKTNA        | 4084        |
|              | .*:: : .: * * . * : : : : : .: : *::* :*                           |             |

**KINASE**

|              |                                                             |             |
|--------------|-------------------------------------------------------------|-------------|
| TERMITE      | SRHESLNKK-----SHEESQTWYPQKLDLAKLKEGANPVTI                   | 3926        |
| SHRIMP       | QKQEGDT-----QDSKVELFSSKRIELLNDKLSDINPAYI                    | 3994        |
| SCORPION     | LKQKRIIGKVDENVSDINIPGNTESDDPNHSECFNWPQKRI LFAKRKLEGINPCYI   | 4063        |
| ALVINELLA    | MRELNQMQSCDENHED-IGIRCTVAVVICPELMTDPHWYPKAKVAFACRKLNGHNPAAH | 3997        |
| CAPITELLA    | KKEIQAMSNRKEDT-----SKLTLD SQWFPKEKVNIVRQKLEGSNPSHV          | 4041        |
| SPONGE       | KKQALAQ-----KINTDDNTWYPKEKVNICRKLKLGFNSSHL                  | 4088        |
| OYSTER       | EKQNMENKVE-----VSPEDVQWYPKEKIEYVKRKLKRGDNPVCI               | 4046        |
| SNAIL        | ERQMRGGMGP-----KDADEDMRWYPKQKIETAARKLKGDNPSYI               | 4053        |
| TRICHOPLAX   | NRQNAKQGL-----KTESDDFSWYPREKVTFAKRKLKGANPAFV                | 4062        |
| SEA_ANEMONE  | RKQAEQDQME-----IGMYEDLTWYPREKVLTAQRKLKGANPAFV               | 4042        |
| PRIAPULA     | ERLADKDIHSN-----ESDQEQVQEWYPKQTI GVARSKLIGANPAHI            | 4094        |
| ESHARK       | LKQMKKGGTW-----NKDVNTREIHWYPMQKVRYARRKLEGANPAAI             | 4072        |
| STERLET      | LKQMKKAGSW-----SEAVNTNEINWYPMQKVNFAARRKLEGANPAVI            | 4081        |
| COELACANTH   | LKQLKKGGSW-----TKEVNTKEVNWYPVQKVKCGRQKLEGVNPIVI             | 4078        |
| <b>HUMAN</b> | <b>QKMLKKGGSW-----IQEINVAEKNWYPQKICYAKRKLKGANPAVI</b>       | <b>4059</b> |
| CAECILIAN    | LKQLKKGQGW-----TKKVNTAEKNWYAVQKVNCAARRKLAGTNPAAI            | 4074        |
| PLATYPUS     | TKMLKKGQGW-----TRAVNTADTNWYPLQKI SYAKRKLKGTNPAAI            | 4066        |
| CANARY       | QRQLKKGQGW-----IKEINTSEVNWYPLQKVNYVRRKLTGANPAII             | 4067        |
| OSTRICH      | QRQLKKGQGW-----IQEINTSEVNWYPLQKVSYVVKRKLKGTGNPGRI           | 4037        |
| TURTLE       | LKQLKKGQGW-----SKEVNTAEINWYPLQKVNCAAKRKLKGANPAVL            | 4075        |
| ALLIGATOR    | LRLKKGQGW-----LKEVNTAEVNWYPLQKVNCAKVRKLAGSNPAAI             | 4035        |
| SOFTCORAL    | RKQAEKQKLN-----LNDMTDLAWYPKEKINSAKRKLKGENPAEI               | 4075        |
| STONYCORAL   | RKQAKTQGIN-----EEEQKADWYPKQKVQSAWRKLEGFNPAYV                | 4101        |
| ACORN_WORM   | KSDASKYGDA-----AEDANEMIERYAKDRINNARRKLQGANPCHI              | 4088        |
| LANCELET     | AKQMDKG-----M-----VGEDDDLDISWYPREKIKFAAKKLQGVNPTHI          | 4136        |
| SEA_URCHIN   | VKQADYQKLS-----EDSREDISWYPKKKIKFAKMLQGVNSTYI                | 4105        |
| STARFISH     | SKQAKAQKDAGRVLEG-Q-----SDPDGNSLDESWYPREKVNFAQKLEGANPSDI     | 4134        |
|              | : : * . * :                                                 |             |

**KINASE**

Supplementary Figure 2: CLUSTAL OMEGA DNA-PKcs METAZOA VERTEBRATE INVERTEBRATE

|              |                                                                                                                  |             |
|--------------|------------------------------------------------------------------------------------------------------------------|-------------|
| TERMITE      | TTEELKAGFKDSK----YLAKFLECVKGH--NSVRSQMPSYQLLP <sup>EE</sup> QVDSLLDQATDYN                                        | 3980        |
| SHRIMP       | TLWAVSQN--KFVAKQKAYENLKQAVL <sup>GDRGESV</sup> RASVGERGLSTH <sup>QQ</sup> VDILLEQATDPN                           | 4052        |
| SCORPION     | TKEELRLGHSNKP----IFQRLTDVCL <sup>GDRK-SL</sup> RQNLPKNGLSVK <sup>QQ</sup> VKSLIDQATDSG                           | 4118        |
| ALVINELLA    | TRDELVQGHKGT----YCCKAAKVVL <sup>GDP</sup> EHDIRAKLPPKCLTVE <sup>EE</sup> QVACLINQATDGN                           | 4053        |
| CAPITELLA    | MRAELALGQLGSY----LKYFVIVLM <sup>GDKQADIR</sup> ARLPADGLSSEE <sup>QV</sup> AALLNLATDPN                            | 4096        |
| SPONGE       | MLIDL <sup>EHGF</sup> KNKP----EFKYLKILL <sup>GDSSTNLR</sup> ARVGRKCD <sup>SVE</sup> DQVCLIDHATDSN                | 4144        |
| OYSTER       | SREELKLGHSKPP----AFPALERV <sup>LQGDKRENVR</sup> AQLPASGLTVE <sup>QQ</sup> VAAALIDQATDPN                          | 4102        |
| SNAIL        | TRDELRI <sup>GHLRNQ</sup> ----ALKDFEKVAL <sup>GVDQDNIR</sup> ARLKEKGLTE <sup>EQ</sup> VAAALIDQATDPN              | 4109        |
| TRICHOPLAX   | TRDELRLCHHL-----SILESFAL <sup>GDKQYNER</sup> ARMPADNLSVE <sup>DQ</sup> VTC <sup>LI</sup> DQATDPN                 | 4114        |
| SEA_ANEMONE  | TRQEL <sup>ELGH</sup> RRRS----WFRNLQSACL <sup>GDRRHNVRA</sup> QKEENELTSE <sup>EA</sup> QVCLIDQATD <sup>VN</sup>  | 4098        |
| PRIAPULA     | TKAELALGHRKHE----ALKQMTNVVL <sup>GDRS<sup>DL</sup>RA</sup> QLPPEGLTVE <sup>QQ</sup> VQCII <sup>EQ</sup> ATEPS    | 4150        |
| ESHARK       | TRDELQ <sup>LGHETTE</sup> ----AYKSYVAVAM <sup>GDK</sup> EHNIRARVPEDGLSVE <sup>IQ</sup> VCLIDQATDPN               | 4128        |
| STERLET      | TSEELRLG <sup>F</sup> EKSP----AYQSI <sup>I</sup> AVAQ <sup>GE</sup> KEHNVRAREAPQLSVE <sup>TQ</sup> VECLIDQATDPN  | 4137        |
| COELACANTH   | TCNEL <sup>QLGHEKLS</sup> ----AYQSYLAVVK <sup>GDPDHNVR</sup> AREVKEDLPVET <sup>QV</sup> ACLIDQATDPN              | 4134        |
| <b>HUMAN</b> | <b>TCDEL<sup>LLGHEKAP</sup>----AFRDYVAVAR<sup>GSKDHNIR</sup>AQEPE<sup>SGLSE</sup>ET<sup>QV</sup>KCLMDQATDPN</b>  | <b>4115</b> |
| CAECILIAN    | TCDEL <sup>ELGHEKSV</sup> ----AYKEMKAVAM <sup>GDKTHNVRA</sup> REPDKGLTE <sup>EQ</sup> VKCLLDQATDPN               | 4130        |
| PLATYPUS     | TCDELRLG <sup>HEKVP</sup> ----AFGDYISVAR <sup>GSKDHNVR</sup> ARQPEGLSE <sup>EQ</sup> VQCLIDQATDPN                | 4122        |
| CANARY       | TCDELRLG <sup>H</sup> ERSP----AYNDFAAVAR <sup>GNSNHDIR</sup> AKEPEDGLSE <sup>ET</sup> QVRC <sup>LI</sup> DQATDPN | 4123        |
| OSTRICH      | TCDELRLG <sup>HEKSP</sup> ----FFSDFVAVAR <sup>GNAAHNTR</sup> AKEPEDGLSE <sup>ET</sup> QVCLIDQATDPN               | 4093        |
| TURTLE       | TCDELRLG <sup>HEKSP</sup> ----AYKEYVAVAR <sup>GSRDHNIR</sup> AKEPEDGLSE <sup>EQ</sup> VRC <sup>LI</sup> DQATDPN  | 4131        |
| ALLIGATOR    | TCEELRLG <sup>HEKSL</sup> ----AYRDYVAVAR <sup>GTRDQNI</sup> RAKEPEDGLTE <sup>EQ</sup> VKCLIDQATDPN               | 4091        |
| SOFTCORAL    | MKQDL <sup>ESGHKAG</sup> ----YYEMLSVLL <sup>GDKQHNR</sup> ARHYV--NTVEN <sup>QV</sup> ACLIDQATDPN                 | 4129        |
| STONYCORAL   | MRDDL <sup>QLGHSKQS</sup> ----WYQMESVCL <sup>GDRNANVR</sup> AREPESGLSVE <sup>SQ</sup> VSC <sup>LI</sup> DQATDAN  | 4157        |
| ACORN_WORM   | TRDELKMN <sup>MNI</sup> KK---HYCTGYIDVCM <sup>GDKKYSM</sup> TREPATGLSVE <sup>EK</sup> QVACLVDQ <sup>AI</sup> DPN | 4145        |
| LANCELET     | TKAEL <sup>QLGHK</sup> NLP----WFKSFCLVAM <sup>GDDGK<sup>DV</sup>RA</sup> QKPAEGLSVE <sup>DQ</sup> VACLIDQATDPN   | 4192        |
| SEA_URCHIN   | TKAEL <sup>EMGPHSKDARDAPFLKAL</sup> KSTC <sup>GGNTE<sup>SK</sup>RA</sup> QSKSKGLSVE <sup>DQ</sup> VACLIDQATDPN   | 4165        |
| STARFISH     | TQRELALG <sup>HSRNP</sup> ----AFSAI <sup>KEVVK</sup> GDRSQNIRASSPKSGLSVE <sup>TQ</sup> VECLIDQATDPN              | 4190        |
|              | : * . *                                                                                                          |             |

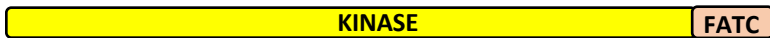

|              |                      |             |
|--------------|----------------------|-------------|
| TERMITE      | ILGKTWQGWEPWM        | 3993        |
| SHRIMP       | ILGRSWIGWDPFL        | 4065        |
| SCORPION     | ILSRIYFGWDPWF        | 4131        |
| ALVINELLA    | ILSRVFCGWEPWM        | 4066        |
| CAPITELLA    | ILGRTFAGWEPWV        | 4109        |
| SPONGE       | VLGRTYGGWEAWV        | 4157        |
| OYSTER       | IVGRVWGGWEPWM        | 4115        |
| SNAIL        | ILGRAWGGWEPWL        | 4122        |
| TRICHOPLAX   | ILGRTWQGWEPWM        | 4127        |
| SEA_ANEMONE  | ILGRAWEGWEAWV        | 4111        |
| PRIAPULA     | LLGRTWVGGWEPWM       | 4163        |
| ESHARK       | ILGRVWEGWEPWM        | 4141        |
| STERLET      | ILGRVWVWGESWV        | 4150        |
| COELACANTH   | ILGRVWEGWEPWM        | 4147        |
| <b>HUMAN</b> | <b>ILGRTWEGWEPWM</b> | <b>4128</b> |
| CAECILIAN    | ILGRVWEGWEPWM        | 4143        |
| PLATYPUS     | ILGRTWIGWEPWM        | 4135        |
| CANARY       | ILGRVWEGWEPWM        | 4136        |
| OSTRICH      | ILGRAWEGWEPWM        | 4106        |
| TURTLE       | LLGRVWEGWEPWM        | 4144        |
| ALLIGATOR    | ILGRVWAGWESWM        | 4104        |
| SOFTCORAL    | ILGRTYHGWEPWV        | 4142        |
| STONYCORAL   | ILGRTWQGWEPWV        | 4170        |
| ACORN_WORM   | ILGRAYEGWEAWV        | 4158        |
| LANCELET     | ILGRTWQGWQSFM        | 4205        |
| SEA_URCHIN   | ILGKTYQGWEPWV        | 4178        |
| STARFISH     | ILGRVYAGWEAWM        | 4203        |
|              | ::: : ** : .         |             |

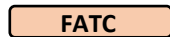

Supplement: NIHMS1638735-supplement-3.pdf [file NIHMS1638735-supplement-3.pdf]
