# Supplementary material for: Uncovering DNA-PKcs ancient phylogeny, unique sequence motifs and insights for human disease
Source: PubMed Central journal article supplement — Prog Biophys Mol Biol. Author manuscript; Available in PMC 2022 Aug 1. (PMC8021618; doi:10.1016/j.pbiomolbio.2020.09.010), 2020-10-06
Supplement: NIHMS1638735-supplement-2.pdf [file NIHMS1638735-supplement-2.pdf]

**Supplementary Figure 1. Alignment of DNA-PKcs from selected jawed vertebrates.**

Full-length DNA-PKcs sequences from selected jawed vertebrates (panel A and Supplementary Table 1), were aligned using Clustal Omega using default settings (1). The percent identity from the percent identical matrix feature is shown in panel A. Panel B shows the full sequence alignment. The human sequence is highlighted in yellow. Identical amino acids are indicated by the asterisks (\*) and shown in blue/bold font. Highly conserved amino acids are indicated by the double dots (:) and shown in blue. Similar amino acids are shown in purple, indicated by single dots (.). Identified DNA-PKcs phosphorylation sites referenced from humans are highlighted in green. The catalytic amino acids DXXXXN and DFG are in red/bold font. See also, Figure 3.

**A. Percent identity with human DNA-PKcs from Clustal Omega.**

| SEQUENCE                             | % ID  |
|--------------------------------------|-------|
| HUMAN                                | 100   |
| MOUSE                                | 79.3  |
| TASDEVIL (Tasmanian Devil)           | 76.76 |
| PLATYPUS                             | 75.02 |
| TURTLE                               | 71.88 |
| ALLIGATOR                            | 70.21 |
| OSTRICH                              | 69.71 |
| GECKO                                | 68.56 |
| CANARY                               | 67.87 |
| CAECIL (amphibian)                   | 67.78 |
| SNAKE                                | 66.5  |
| LATIMERIA (coelacanth)               | 65.32 |
| STERLET (fish)                       | 64.8  |
| XENOPUS                              | 64.31 |
| BAMBOO (Banded Bamboo Shark, bshark) | 62.27 |
| MILII (Elephant shark, eshark)       | 62.14 |
| GAR (fish)                           | 61.77 |
| DANIO                                | 58.42 |

**Panel B: Clustal Omega alignment of DNA-PKcs/PRKDC in selected jawed vertebrates.**

CLUSTAL O(1.2.4) multiple sequence alignment

|              |                                                            |           |
|--------------|------------------------------------------------------------|-----------|
| DANIO        | -----MAADTSTVGGIQGYLLKLHSSLEDTVSTNVAIVCHDIIGDLGQ           | 43        |
| MILII        | -----MAGPRGAAADTLSAFSLHLLSLSDVKSAAEESHSAVGSISR             | 43        |
| BAMBOO       | -----MADGMRRHGAGVGLVEERRLQQLQLLSAQDSRSAAVESHIVANLTH        | 48        |
| XENOPUS      | MLLAGAGGSSGDGQDGVASGPAESAAGILGRLHLHGLLSLE-SGVAEGAHSLLHNLAE | 59        |
| STERLET      | -----MAQPGSCSVGAGGIQGNLHKLHSLFNATDAKSAAVESHNLIGNLGQ        | 46        |
| GAR          | -----MAGSGGGIQGYLQKLHSLCGAGETKQTALECHSVIGDLGQ              | 40        |
| LATIMERIA    | -----MAEEGGSPSAVEGVSYLLKIHSSLTVDTKSAAIEISNIFGNLRQ          | 46        |
| CAECIL       | -----MSVPGVGGDSAVGVQGSLLRRLHASLSSKDPGLEAPVAQSLIRSLGE       | 46        |
| SNAKE        | -----MASSL-VVP---GGGLQGFLQLHDLRSDASSAALRGCSLIRSVAE         | 44        |
| CANARY       | -----MAGVQQCLLQLHRCLQPGDAGGSALHGYSLLRSLAE                  | 36        |
| OSTRICH      | -----MCS-----ERKDVQA                                       | 10        |
| GECKO        | -----MAISLPVA---GGGLQGLLQLHGTLQSPDPASAALHGHSLIRSMAE        | 44        |
| TURTLE       | -----MAAALPVG---GGGIQGSLLHQLSCALQDPDPGTAALRGYHLIRGVGE      | 45        |
| ALLIGATOR    | -----MAALV                                                 | 5         |
| PLATYPUS     | -----MAGSVPGPQGSLLRRLQRFLEAEDAGVSAVAAYQLIRGLGQ             | 40        |
| TASDEVIL     | -----MSGAGGGGLQGSLLQLQELLSSGGDPGSAALAAAYHLIRAVGQ           | 41        |
| <b>HUMAN</b> | <b>-----MAGSGAGVRCSSLRLQETLSAADRCGAALAGHQIRGLGQ</b>        | <b>40</b> |
| MOUSE        | -----MAEEGTGVRWLLQLQEFLSAADRCGAAGASYQLIRSLGQ               | 40        |

**N-TERMINAL UNIT**

|              |                                                                                                |           |
|--------------|------------------------------------------------------------------------------------------------|-----------|
| DANIO        | ECMITK-NENELV <b>LQTSLLFAKEEGLLSFLRRSL</b> STEKLGTTGVEIL <b>RETRVEIMN</b> FLGA                 | 102       |
| MILII        | DFRCSSSSDSQLAL <b>QSSMVF</b> SKDT <b>GLLVFLRKSL</b> RFEE-----FRD <b>SRE</b> DVLKLLSE           | 95        |
| BAMBOO       | DLH-NTHESRLAL <b>HSLSL</b> VFSKDE <b>GLLI</b> FLRK <b>SL</b> SNEE-----FRD <b>CREE</b> VLKLLITA | 99        |
| XENOPUS      | ECLVSA <b>L</b> GSSALD <b>LNTSL</b> IFSKE <b>FGLLAFVRK</b> SLSSDE-----FKD <b>CREE</b> ALKFLYT  | 111       |
| STERLET      | ECMVSK-NENELV <b>LQTS</b> LIFSKE <b>GLLAFVRK</b> SLNIED-----FRD <b>TREE</b> ALKLLT             | 97        |
| GAR          | ECLVVR-NENELV <b>LRSSLL</b> FSKED <b>GLLSFLRK</b> SLSSD-----FRD <b>VREE</b> VLKLLST            | 91        |
| LATIMERIA    | ECLVTS-DENELAL <b>HISL</b> IFSKE <b>I</b> GLLI <b>FLRK</b> SLSSEE-----FRD <b>NREE</b> ILKFLTA  | 97        |
| CAECIL       | ECVTSS-GDSVLAL <b>QTS</b> LIFSKE <b>HGLLAFI</b> HK <b>SL</b> GIIE-----FRD <b>CREE</b> TLKFLCI  | 97        |
| SNAKE        | SCVTSS-GDDILAL <b>QISL</b> VFSKEN <b>GLLSFI</b> YK <b>SL</b> SVED-----FR <b>ECRE</b> EALKFLILA | 95        |
| CANARY       | TCLASL-ASGEQAL <b>HLSL</b> VFSQ <b>EYGLLVFI</b> HR <b>SL</b> TIEE-----FRD <b>CREE</b> ALKFLCV  | 87        |
| OSTRICH      | DCVF----ALPAAL <b>HISL</b> VFSQ <b>EYGLLVFI</b> HK <b>SL</b> GIIE-----FRD <b>CREE</b> ALKFLCA  | 58        |
| GECKO        | TCVTSS-GDVARAL <b>QTS</b> LVSF <b>SKEDGLLAFI</b> HK <b>SL</b> STEE-----FR <b>ECRE</b> EILKFLCA | 95        |
| TURTLE       | ACVTST-GDGARAL <b>QTS</b> LVSF <b>SKDNGLLVFVRK</b> SLSMEE-----FR <b>ECRE</b> EALKFLCA          | 96        |
| ALLIGATOR    | PVVIRT-GDSAQAL <b>QSSL</b> VFSK <b>DQGLLVFI</b> RK <b>SL</b> SIEE-----FRD <b>CREE</b> ALKFLCT  | 56        |
| PLATYPUS     | ECVLSA-GPAVQAL <b>HTSL</b> VFSKE <b>FGLPVFI</b> RK <b>SL</b> DIEE-----FRD <b>CREE</b> ALKFLCI  | 91        |
| TASDEVIL     | EGVLCT-SPAVLAL <b>QTS</b> LIFSKE <b>FGLLVFI</b> RES <b>LS</b> SIEE-----FRD <b>CREE</b> ALKFLCI | 92        |
| <b>HUMAN</b> | <b>ECVLSS-SPAVLALQTS</b> LVSF <b>SRDFGLLVFVRK</b> SLNSIE-----FR <b>ECRE</b> EILKFLCI           | <b>91</b> |
| MOUSE        | ECVLST-SSAVQAL <b>QISL</b> VFSR <b>DFGLLVFI</b> RK <b>SL</b> SIED-----FRD <b>CREE</b> ALKFLCV  | 91        |

\* . \* : \* : : \* \* \* : \* : \* \* . : : : \* : : : :

**N-TERMINAL UNIT**

Supplementary Figure 1. DNA-PKcs, jawed vertebrates

|           |                         |                              |                             |                  |                 |         |    |
|-----------|-------------------------|------------------------------|-----------------------------|------------------|-----------------|---------|----|
| DANIO     | FLQRMSATVRGWEKNYAVELKDT | CIVVYTKDKSAKCRNPALDLLIKILYLT | TKDSSITQNL                  | 162              |                 |         |    |
| MILII     | VVERIGEAVG----          | RYACDIKGT                    | CVVVYTKDKAAKCKAAALDLLITLLH  | SKLSSSCLQQF 151  |                 |         |    |
| BAMBOO    | FVEKIKETVG----          | PYALDIKDV                    | CLVIYTKDKAAKCKVAAALDLLLVLL  | HSK---VCLQEF 152 |                 |         |    |
| XENOPUS   | FLEKIGSNVQ----          | PYAMDIKTLC                   | VIVYTKDRAAKCKIPSELELLIKLL   | QLLKNSIIEEF 167  |                 |         |    |
| STERLET   | FLDRIAHKVN              | GWENYACDIKDT                 | CLVVYTKDRAAKCKVSALELLIKLL   | HITS-PCLLQEF 156 |                 |         |    |
| GAR       | FLQRITQSVK              | GWERNYAVDIK                  | ETCLVVYTKDKAAKCRVPAL        | SLLIQLLHG        | TKSSGVAQDF 151  |         |    |
| LATIMERIA | FVEKIGQKLN----          | PYACNVKL                     | LILFPVFFF-----FIFIF         | FTYLQLLQ         | STKSPHCIEEF 148 |         |    |
| CAECIL    | FLEKIGQKVQ----          | PYACDIKNT                    | CVVVYTKDKAAKCKVPALELLIKVL   | QILKNSYEIEEL 153 |                 |         |    |
| SNAKE     | FVEKIGPKIQ----          | PYAQDVKR                     | ICVTAYTKDRSAKCGIPALELLIKLL  | QKLQSSYAMVDM 151 |                 |         |    |
| CANARY    | FMEKVGDKIH----          | PYACNIKQ                     | TCLSVYIKERTAKCKISALELLIKLL  | HQLQR            | SCLMEEM 143     |         |    |
| OSTRICH   | FLEKIGEKVH----          | PYACNVKQ                     | TCSIVYTKERAACKIPALELLIKLL   | QNLRR            | SCLMEEM 114     |         |    |
| GECKO     | FLEKIGEKIH----          | LYAHDVKR                     | TCTIIVYTKDKSAKCRIPALELLIKLL | QNVRS            | ACVMEEM 151     |         |    |
| TURTLE    | FLEKIGQQVH----          | PYAHDIKQ                     | TCSIVYTKDKAAKCKIPALELLIKLL  | QNLRS            | SFLMEEL 152     |         |    |
| ALLIGATOR | FLEKIGQGVH----          | PYACDIKQ                     | TCSIVYTKDKMAKCKIPALELLIKLL  | QNVQC            | SSLMGEL 112     |         |    |
| PLATYPUS  | FLEKIGQKIE----          | PYSYDIK                      | SVCSIVYTKDRAAKCKIPALELLIKLL | QTLRSS           | RMEEL 147       |         |    |
| TASDEVIL  | FLEKIGQKIE----          | PYSLGIK                      | SVCTSVYTKDKAAKCKIPALELLIKLL | QTLRSS           | RYMEEF 148      |         |    |
| HUMAN     | FLEKMGQKIA----          | PYSVEIKNT                    | CCTSVYTKDRAAKCKIPALDLLIKLL  | QTFRSS           | RMLDEF 147      |         |    |
| MOUSE     | FLEKIDQKVM----          | HYSLDIKNT                    | CCTSVYTKDR                  | TAKCKIPALDLLIKLL | QILRSTR         | LMD 147 |    |
|           | ..:..:                  | :                            | *: *                        | :                | :               | : *     | :: |

**N-TERMINAL UNIT**

|           |          |           |         |         |        |          |        |        |        |        |        |            |     |            |            |
|-----------|----------|-----------|---------|---------|--------|----------|--------|--------|--------|--------|--------|------------|-----|------------|------------|
| DANIO     | RIGDMFNK | FYGELCQKH | KIPDTV  | LGCIYEL | LGVLE  | GEVHPSEM | VNNSDK | LYKAY  | L      | GELK   | Q      | 222        |     |            |            |
| MILII     | KIGELFN  | KFYGDL    | SQSKFP  | DTVLE   | KVYEL  | LGVLA    | EVQPT  | EMLHN  | SEKLF  | CAYL   | NEL    | RVQ 211    |     |            |            |
| BAMBOO    | KIGDMFN  | KFYGEL    | AQSKLP  | DTVLE   | KVYEL  | LGVLA    | EVQPT  | EMLDN  | SEKLF  | RAYL   | NEL    | KIQ 212    |     |            |            |
| XENOPUS   | KIGEIFN  | KFYGEL    | ATKSL   | SDTVLE  | KVYEL  | LGVLE    | GEVQ   | CEMTY  | NSEKLF | KAF    | L      | GELKAQ 227 |     |            |            |
| STERLET   | KVGD     | MFNK      | FYGDL   | AQSKIP  | DTVLE  | KIYEL    | LGVLE  | GEVQ   | SDMLN  | NSEKLF | RAYL   | SELKSQ 216 |     |            |            |
| GAR       | RVGD     | MFNK      | FYGEL   | SQSRIP  | DTVLE  | GNIE     | LGVLA  | EVQ    | SDMTD  | NSEKLF | RAYL   | GELKSQ 211 |     |            |            |
| LATIMERIA | KVSEM    | MFNK      | FYGEL   | AQRSKLP | DTVLE  | KVYEL    | LGVLE  | GEVQ   | SEM    | LHN    | SEKLF  | RAF        | L   | GELKTQ 208 |            |
| CAECIL    | KVKEIFN  | KFYSEL    | GVKSKVP | DTVLE   | KVYEL  | LGVLE    | GEVQ   | SDMLD  | NSEKLF | RAYL   | GEL    | KKQ 213    |     |            |            |
| SNAKE     | KVGEIFN  | KFYGEI    | AIKSKVP | DTVLE   | KIYEL  | LGVLE    | GEVQ   | SEM    | IDN    | SEKLF  | FRAYL  | LE         | L   | KVQ 211    |            |
| CANARY    | KVGEIFN  | KFYEEL    | AARSRI  | DTVLE   | KIYEL  | LGVLE    | GEVQ   | SDM    | INN    | SEKLF  | FRAYL  | REL        | K   | TQ 203     |            |
| OSTRICH   | KVGEIFN  | KFYGEL    | ATRSKVP | DTVLE   | KIYEL  | LGVLE    | GEVQ   | SDM    | INN    | SEKLF  | FRAYL  | GEL        | K   | TQ 174     |            |
| GECKO     | KVGEIFN  | KFYGEL    | AVKSKVP | DTVLE   | RIYEL  | LGVLE    | GEVQ   | SDML   | E      | NSEKLF | FRAYL  | GEL        | K   | TQ 211     |            |
| TURTLE    | KVGEIFN  | KFYGEL    | AARSKVP | DTVLE   | KLIE   | LGVLE    | GEVQ   | SDM    | V      | D      | NSEKLF | RAF        | L   | GELKTQ 212 |            |
| ALLIGATOR | KVGEIFN  | KFYGEL    | AGSRVP  | DTVLE   | KIYEL  | LGVLE    | GEVQ   | SDML   | D      | NSEKLF | FRAYL  | GEL        | K   | TQ 172     |            |
| PLATYPUS  | KVGGIFN  | KFYEEL    | ALKTKIT | DTVLE   | KIYEL  | LGVLE    | GEVHP  | SEM    | LCN    | SEKLF  | FRAYL  | GEL        | K   | MQ 207     |            |
| TASDEVIL  | QLGEL    | FSK       | FYGEL   | ALKTKI  | ADTVLE | KIYEL    | LGVLE  | GEVHP  | SVM    | VHN    | SEKLF  | RAF        | L   | GELKTQ 208 |            |
| HUMAN     | KIGEL    | FSK       | FYGEL   | ALKKIP  | DTVLE  | KVYEL    | LGLL   | GEVHP  | SEM    | INNA   | ENL    | RAF        | L   | GELKTQ 207 |            |
| MOUSE     | KIGEL    | FNK       | FYGEL   | ASKSKLP | DTVLE  | KVYEL    | LGVLE  | GEVHP  | SEM    | INH    | SEN    | L          | RAF | L          | GELKTQ 207 |
|           | ::       | :*        | ***     | ::      | :      | :        | ****   | :***** | :***   | *      | ::**   | :*         | *** | :          |            |

**N-TERMINAL UNIT**

Supplementary Figure 1. DNA-PKcs, jawed vertebrates

|              |                                                                                                                     |            |
|--------------|---------------------------------------------------------------------------------------------------------------------|------------|
| DANIO        | <b>MTSTTKEPKLPVVGCLKGLAALMVNFTKSV</b> <b>EDP</b> AASKEIFDYALKAI <b>SPQTDIKRYAV</b>                                  | 282        |
| MILII        | <b>MTSATREPKFLVVGCLRGLTALMINFTKSM</b> <b>EDP</b> KASKDIFDYALKAINPQIDL <b>KRYAV</b>                                  | 271        |
| BAMBOO       | <b>MTSATRQPKFLVVGCLRGLIALMVNFTKS</b> <b>IEDP</b> RTSKEIFDCAVKAINLKID <b>KRYAV</b>                                   | 272        |
| XENOPUS      | <b>MNSSTRNPKFPVIAGCLKGLSALMINFTK</b> <b>ME</b> DPRTSKEIFDYTVKAI <b>SPQVEMKRYAV</b>                                  | 287        |
| STERLET      | <b>MTSATREPKLPVVGCLKGLTALMINFTK</b> <b>SM</b> EDPKSSKEIFDFALKAI <b>SPQTEFKRYAV</b>                                  | 276        |
| GAR          | <b>MTSTTREP</b> <b>KLPVAGCLKGLTALLVNFTK</b> <b>SM</b> EDPKTSKEIFDYALK <b>SI</b> SPQTE <b>FKRYAV</b>                 | 271        |
| LATIMERIA    | <b>MRSTTKEPKLSVVGCLRGLTALMINFTK</b> <b>SV</b> EDPKTSKEIFDYAVMAI <b>SPQVDL</b> <b>KRYAV</b>                          | 268        |
| CAECIL       | <b>MTSTTREP</b> <b>KLSVVGCLKGLTSLMINFTK</b> <b>MD</b> EDPKVSKEIFDYSVKAI <b>SPQVEL</b> <b>KRYAV</b>                  | 273        |
| SNAKE        | <b>MTSATRQTKFPVIVAGCLKGLTALMYN</b> <b>FTK</b> <b>SM</b> EDPRTSKEIFDFAVKAI <b>SPKIDL</b> <b>KRYAV</b>                | 271        |
| CANARY       | <b>MTSATRGP</b> <b>KLPVAGCLRGLV</b> ALMYNFTK <b>SV</b> EDPQT <b>AKE</b> IFDFAMKAINPQVD <b>Q</b> <b>KRYAV</b>        | 263        |
| OSTRICH      | <b>MTSTTRVP</b> <b>KLPVAGCLRGLAALMYN</b> <b>FTK</b> <b>SE</b> EDPQTSKEIFDFAMKAI <b>RPQID</b> <b>Q</b> <b>KRYAV</b>  | 234        |
| GECKO        | <b>MTSSSTREP</b> <b>KFPVVGCLKGLTALMYN</b> <b>FTK</b> <b>SM</b> EDPQTSKEIFDFAVKAI <b>NPQVDL</b> <b>KRYAV</b>         | 271        |
| TURTLE       | <b>MTSATREPKLPVVGCLKGLTALMYN</b> <b>FTK</b> <b>SM</b> EDPHTSKEIFDFAVKAINPQVDL <b>KRYAV</b>                          | 272        |
| ALLIGATOR    | <b>MTSATREPKLPVVGCLKGLTALLYN</b> <b>FTK</b> <b>SM</b> EDPRTSKEVDFSVKAINPQVDL <b>KRYAV</b>                           | 232        |
| PLATYPUS     | <b>MTSSSTREP</b> <b>KLPVVGCLKGLSALMCN</b> <b>FTK</b> <b>SM</b> EDPQTSKEIFDFAVKAI <b>SPQVDL</b> <b>KRYAV</b>         | 267        |
| TASDEVIL     | <b>MTSTTREP</b> <b>KLPVVGCLKGLSSLMYN</b> <b>FTK</b> <b>SM</b> EDPQMSKEIFDFALKAI <b>SPQVDL</b> <b>KRYAV</b>          | 268        |
| <b>HUMAN</b> | <b>MTSAVREP</b> <b>KLPVLAGCLKGLSLLCN</b> <b>FTK</b> <b>SM</b> EDPQTS <b>REIF</b> NFVLKAI <b>RPQIDL</b> <b>KRYAV</b> | <b>267</b> |
| MOUSE        | <b>MTSTVREP</b> <b>KFPVLAGCLKGLSLLCN</b> <b>FTK</b> <b>SM</b> EDPQTSKEIFGFTFKAI <b>RPQIEM</b> <b>KRYAV</b>          | 267        |

**N-TERMINAL UNIT**

|              |                                                                                                                             |            |
|--------------|-----------------------------------------------------------------------------------------------------------------------------|------------|
| DANIO        | IF <b>AGL</b> KL <b>FAKHSSQ</b> FGSCLMDHYISIFDV <b>MSK</b> <b>HCGH</b> INAELKKS <b>SYTALES</b> FLKQVATLV                    | 342        |
| MILII        | PL <b>AGL</b> RL <b>FTLHSSQ</b> FGTCLMDNYRTVFEKMK <b>KSCGH</b> TNSEMKKASYS <b>SALES</b> FLKQVAIQV                           | 331        |
| BAMBOO       | PL <b>AGL</b> RL <b>FTLHANQ</b> FKTCLLD <b>SYQVLF</b> FETMS <b>KWCGH</b> TNIEMKKAGYA <b>SALES</b> FLKEIALQV                 | 332        |
| XENOPUS      | PS <b>AGL</b> NLLAL <b>HASQ</b> FSSYLMDDYQSLFEV <b>ISKWCGH</b> TNGEMKKLAF <b>AALES</b> FLKQIAHLV                            | 347        |
| STERLET      | LL <b>AGL</b> RL <b>FAKHAGQ</b> FSSCLMDNYRSLYEV <b>MSK</b> <b>WCGH</b> TNIEMKKAGYH <b>ALES</b> AF <b>FLKQV</b> ALLV         | 336        |
| GAR          | LF <b>AGL</b> KL <b>FARHAEQ</b> FSSCLIDNYRSIFEV <b>MSK</b> <b>WCGH</b> TNAELKRAGHS <b>SALES</b> FLKQVAVLV                   | 331        |
| LATIMERIA    | PL <b>AGL</b> RMFAL <b>HANQ</b> FNTCLMDNYRSLFETMS <b>KCCGH</b> ANGELKRAGYA <b>ALEN</b> FLKQV <b>AMV</b>                     | 328        |
| CAECIL       | PL <b>AGL</b> HMLAI <b>HASQ</b> FGSCLMDNYRSLYEV <b>MSK</b> <b>WCGH</b> TNADLKKAGHL <b>ALES</b> FLKQIASIV                    | 333        |
| SNAKE        | PL <b>AGL</b> HLF <b>SKHAEQ</b> FSTCLLDNYVSLFHT <b>MAK</b> <b>WCGH</b> QNAELKKAGHS <b>ALDS</b> FLKQVSSMV                    | 331        |
| CANARY       | PL <b>AGL</b> QLFI <b>WHSAQ</b> FGALLDNYVSLYEV <b>MCKWCGH</b> THPELKKASYS <b>ALDS</b> FLKQISLMV                             | 323        |
| OSTRICH      | QL <b>AGL</b> QLF <b>GRHAAQ</b> FTFLLD <b>SYVSL</b> FET <b>MCKWCGH</b> TNQELKKAGHS <b>ALDS</b> FLKQISLMV                    | 294        |
| GECKO        | PL <b>AGL</b> HLF <b>SVHAVQ</b> FSTCLLDNYVSLFEV <b>MSK</b> <b>WCGH</b> QNAELRKVSNS <b>ALDA</b> FLKQVSEMV                    | 331        |
| TURTLE       | PL <b>AGL</b> HLF <b>SMHAAQ</b> FTFLLDNYISLFEV <b>L</b> <b>SKWCGH</b> TNAELKKGGHS <b>ALDS</b> FLRQISLMV                     | 332        |
| ALLIGATOR    | PL <b>AGL</b> RMF <b>GLHAAQ</b> FTCLLDNYVMLFEV <b>MSK</b> <b>WCGH</b> TNVDLKKAGHS <b>ALDS</b> V <b>FLKQ</b> ISLMV           | 292        |
| PLATYPUS     | PL <b>AGL</b> HLF <b>TVHASQ</b> FTNLLDNYVYLF <b>EVMAK</b> <b>WCGH</b> TNGELKKVAHS <b>ALDS</b> FLKQISLMV                     | 327        |
| TASDEVIL     | PL <b>AGL</b> RL <b>FTLHASQ</b> FSTCLLDNYISLFEI <b>MSK</b> <b>WCGH</b> TNGELKKIAHS <b>ALDS</b> FLKQVSLMV                    | 328        |
| <b>HUMAN</b> | <b>PSAGL</b> RL <b>FALHASQ</b> FSTCLLDNYVSLFEV <b>LLK</b> <b>WCAH</b> TNVELKKA <b>ALS</b> <b>SALES</b> FLKQVSNMV            | <b>327</b> |
| MOUSE        | PL <b>AGL</b> RL <b>LTLHASQ</b> F <b>TACL</b> LDNYITLFEV <b>L</b> <b>SKWCSH</b> TNVELKKA <b>AAHS</b> <b>SALES</b> FLRQISFTV | 327        |

**N-TERMINAL UNIT**

Supplementary Figure 1. DNA-PKcs, jawed vertebrates

|           |                                                                                                                                                                                                                                                                                                                                                |     |
|-----------|------------------------------------------------------------------------------------------------------------------------------------------------------------------------------------------------------------------------------------------------------------------------------------------------------------------------------------------------|-----|
| DANIO     | AENIELHKS <del>KL</del> FFMQ <del>Q</del> FC <del>AI</del> IR <del>TM</del> D <del>ST</del> NKEL <del>S</del> I <del>AIR</del> G <del>Y</del> G <del>L</del> F <del>FA</del> AP <del>CK</del> V <del>V</del> CP <del>QD</del> V <del>DL</del> MYTE                                                                                             | 402 |
| MILII     | AEN <del>A</del> HL <del>H</del> KD <del>K</del> LE <del>Y</del> IM <del>Q</del> Q <del>F</del> Y <del>D</del> IIR <del>T</del> P <del>ES</del> SMKEL <del>S</del> I <del>AIR</del> G <del>Y</del> G <del>L</del> F <del>FA</del> AP <del>CK</del> AV <del>NS</del> ND <del>V</del> DFMYIE                                                     | 391 |
| BAMBOO    | AEDAHL <del>H</del> KD <del>K</del> LQ <del>Y</del> FM <del>Q</del> Q <del>F</del> YS <del>I</del> IR <del>T</del> M <del>ES</del> STKEL <del>S</del> I <del>AIR</del> G <del>Y</del> G <del>L</del> F <del>FA</del> AP <del>CK</del> AV <del>D</del> SH <del>H</del> V <del>D</del> FM <del>Y</del> TE                                        | 392 |
| XENOPUS   | ASDAETH <del>H</del> KN <del>K</del> LH <del>FF</del> ME <del>Q</del> F <del>Y</del> E <del>I</del> IR <del>K</del> M <del>D</del> SSNKEL <del>S</del> I <del>AIR</del> G <del>Y</del> G <del>L</del> F <del>FA</del> AP <del>CK</del> AV <del>NA</del> KN <del>V</del> DL <del>M</del> YIE                                                    | 407 |
| STERLET   | AENAELHKS <del>K</del> LE <del>FF</del> MR <del>Q</del> F <del>Y</del> T <del>V</del> IR <del>T</del> LD <del>S</del> STKEL <del>S</del> I <del>AIR</del> G <del>Y</del> G <del>L</del> F <del>FA</del> AP <del>CK</del> AV <del>CL</del> GD <del>V</del> DFMYTE                                                                               | 396 |
| GAR       | AENAELHKS <del>K</del> KL <del>FF</del> MQ <del>Q</del> FC <del>S</del> I <del>K</del> T <del>T</del> D <del>ST</del> NKEL <del>S</del> I <del>AIR</del> G <del>Y</del> G <del>L</del> F <del>FA</del> AP <del>CK</del> AV <del>CP</del> Q <del>D</del> V <del>DL</del> MYTE                                                                   | 391 |
| LATIMERIA | AENAELH <del>K</del> N <del>K</del> L <del>E</del> Y <del>F</del> MK <del>Q</del> F <del>Y</del> GI <del>IR</del> TL <del>D</del> SSNKEL <del>S</del> I <del>AIR</del> G <del>Y</del> G <del>L</del> F <del>FA</del> AP <del>CK</del> AV <del>CP</del> ED <del>V</del> DL <del>M</del> YTE                                                     | 388 |
| CAECIL    | THDAETH <del>H</del> KS <del>K</del> LQ <del>FF</del> MD <del>Q</del> F <del>Y</del> R <del>I</del> IR <del>K</del> L <del>D</del> SSNKEL <del>S</del> I <del>AIR</del> G <del>Y</del> G <del>L</del> F <del>FA</del> AP <del>CK</del> V <del>I</del> NA <del>K</del> D <del>V</del> DFMYIE                                                    | 393 |
| SNAKE     | AKD <del>V</del> EM <del>H</del> KS <del>K</del> L <del>R</del> FF <del>M</del> E <del>E</del> F <del>Y</del> GI <del>IR</del> N <del>M</del> D <del>A</del> SNKEL <del>S</del> I <del>AIR</del> G <del>Y</del> G <del>L</del> F <del>FA</del> AP <del>CK</del> V <del>I</del> NP <del>K</del> D <del>V</del> DFMYE                            | 391 |
| CANARY    | AKDAELH <del>H</del> KS <del>K</del> L <del>R</del> FF <del>M</del> E <del>Q</del> F <del>Y</del> GI <del>IR</del> R <del>M</del> D <del>S</del> SSKEL <del>S</del> I <del>AIR</del> G <del>Y</del> G <del>L</del> F <del>FA</del> SP <del>CK</del> AI <del>H</del> P <del>E</del> D <del>V</del> DN <del>M</del> YVE                          | 383 |
| OSTRICH   | AKDAELH <del>H</del> KS <del>K</del> LQ <del>FF</del> MD <del>Q</del> F <del>Y</del> GI <del>IR</del> R <del>M</del> D <del>S</del> SNREL <del>S</del> I <del>A</del> I <del>H</del> G <del>Y</del> G <del>L</del> F <del>FA</del> AP <del>CK</del> AI <del>R</del> SK <del>D</del> V <del>D</del> Y <del>M</del> YVE                          | 354 |
| GECKO     | AKDAEM <del>H</del> KS <del>K</del> LN <del>Y</del> FM <del>Q</del> Q <del>F</del> YS <del>I</del> IR <del>K</del> M <del>D</del> SSNKEL <del>S</del> I <del>AIR</del> G <del>Y</del> G <del>L</del> F <del>FA</del> AP <del>CK</del> AI <del>NS</del> K <del>D</del> V <del>DF</del> MYVE                                                     | 391 |
| TURTLE    | AKDAEM <del>H</del> KS <del>K</del> LQ <del>FF</del> ME <del>K</del> F <del>Y</del> D <del>I</del> IR <del>K</del> M <del>D</del> SSNKEL <del>S</del> I <del>AIR</del> G <del>Y</del> G <del>L</del> F <del>FA</del> AP <del>CK</del> AI <del>NS</del> K <del>D</del> V <del>DF</del> MYVE                                                     | 392 |
| ALLIGATOR | AKDAEM <del>H</del> KS <del>K</del> KL <del>FF</del> ME <del>Q</del> F <del>Y</del> S <del>I</del> IR <del>K</del> M <del>D</del> SSNKEL <del>S</del> I <del>AIR</del> G <del>Y</del> G <del>L</del> F <del>FA</del> AP <del>CK</del> AI <del>NS</del> K <del>D</del> V <del>D</del> I <del>M</del> YIE                                        | 352 |
| PLATYPUS  | AKD <del>V</del> EL <del>H</del> RS <del>K</del> LQ <del>Y</del> F <del>M</del> E <del>Q</del> F <del>Y</del> E <del>I</del> IR <del>K</del> I <del>D</del> STNKEL <del>S</del> I <del>AIR</del> G <del>Y</del> G <del>L</del> F <del>FA</del> AP <del>CK</del> V <del>I</del> NP <del>N</del> D <del>V</del> D <del>I</del> M <del>Y</del> IE | 387 |
| TASDEVIL  | AKDAEA <del>H</del> TS <del>T</del> L <del>R</del> Y <del>F</del> TE <del>Q</del> F <del>Y</del> GI <del>IR</del> N <del>V</del> D <del>S</del> SSKEL <del>S</del> I <del>AIR</del> G <del>Y</del> G <del>M</del> F <del>AG</del> P <del>CK</del> S <del>I</del> NA <del>K</del> D <del>V</del> DFMYIE                                         | 388 |
| HUMAN     | AKNAEM <del>H</del> KN <del>K</del> LQ <del>Y</del> F <del>M</del> E <del>Q</del> F <del>Y</del> GI <del>IR</del> N <del>V</del> D <del>S</del> NNKEL <del>S</del> I <del>AIR</del> G <del>Y</del> G <del>L</del> F <del>AG</del> P <del>CK</del> V <del>I</del> NA <del>K</del> D <del>V</del> DFMYVE                                         | 387 |
| MOUSE     | AEDAELH <del>K</del> S <del>R</del> L <del>K</del> Y <del>F</del> M <del>E</del> Q <del>F</del> Y <del>G</del> I <del>IR</del> N <del>T</del> D <del>S</del> NNKEL <del>A</del> I <del>AIR</del> G <del>Y</del> G <del>L</del> F <del>AG</del> P <del>CK</del> V <del>I</del> NA <del>K</del> D <del>V</del> DFMYVE                            | 387 |
|           | : : . * . * . : : * : : : : * : : * : : * : : * : : * : : * : : * : : * : : * : : *                                                                                                                                                                                                                                                            |     |

**N-TERMINAL UNIT**

|           |                                                                                                                                                                                                                                                                                                                                                                                                                                                       |     |
|-----------|-------------------------------------------------------------------------------------------------------------------------------------------------------------------------------------------------------------------------------------------------------------------------------------------------------------------------------------------------------------------------------------------------------------------------------------------------------|-----|
| DANIO     | LI <del>Q</del> R <del>C</del> K <del>Q</del> MYL <del>T</del> E <del>S</del> DR <del>DD</del> D <del>N</del> VY <del>Q</del> L <del>P</del> S <del>F</del> L <del>D</del> S <del>I</del> A <del>S</del> V <del>L</del> V <del>H</del> L <del>D</del> R <del>I</del> P <del>E</del> V <del>Y</del> T <del>P</del> V <del>L</del> ER <del>L</del> L <del>V</del> V <del>Q</del> D <del>S</del> F <del>P</del>                                          | 462 |
| MILII     | LI <del>Q</del> R <del>C</del> K <del>Q</del> MYL <del>T</del> E <del>A</del> D <del>T</del> E <del>D</del> D <del>N</del> VY <del>Q</del> L <del>P</del> S <del>F</del> L <del>D</del> S <del>I</del> A <del>S</del> V <del>I</del> F <del>H</del> L <del>D</del> K <del>I</del> P <del>G</del> V <del>Y</del> T <del>P</del> V <del>L</del> ER <del>L</del> L <del>V</del> V <del>Q</del> I <del>D</del> S <del>F</del> P                           | 451 |
| BAMBOO    | LI <del>Q</del> R <del>C</del> K <del>Q</del> MYL <del>T</del> E <del>A</del> D <del>T</del> E <del>D</del> D <del>N</del> IY <del>Q</del> L <del>P</del> S <del>F</del> L <del>D</del> S <del>I</del> A <del>S</del> V <del>I</del> F <del>H</del> M <del>D</del> K <del>I</del> P <del>D</del> I <del>Y</del> T <del>S</del> V <del>L</del> ER <del>L</del> L <del>V</del> V <del>Q</del> I <del>D</del> S <del>F</del> P                           | 452 |
| XENOPUS   | LI <del>Q</del> R <del>C</del> K <del>Q</del> MYL <del>T</del> E <del>A</del> D <del>T</del> E <del>D</del> D <del>N</del> VY <del>Q</del> L <del>P</del> N <del>F</del> L <del>Q</del> S <del>V</del> A <del>S</del> V <del>I</del> L <del>H</del> M <del>D</del> S <del>I</del> P <del>E</del> V <del>Y</del> T <del>P</del> I <del>L</del> ER <del>L</del> L <del>V</del> V <del>Q</del> I <del>D</del> S <del>F</del> P                           | 467 |
| STERLET   | LI <del>Q</del> R <del>C</del> K <del>Q</del> MYL <del>T</del> E <del>T</del> D <del>T</del> E <del>D</del> D <del>N</del> VY <del>Q</del> L <del>P</del> S <del>F</del> L <del>D</del> S <del>I</del> A <del>S</del> V <del>I</del> F <del>H</del> L <del>D</del> R <del>I</del> P <del>E</del> V <del>Y</del> T <del>P</del> V <del>L</del> ER <del>L</del> L <del>V</del> V <del>Q</del> I <del>D</del> S <del>F</del> P                           | 456 |
| GAR       | LI <del>Q</del> R <del>C</del> K <del>Q</del> MYL <del>T</del> E <del>T</del> D <del>T</del> E <del>D</del> D <del>N</del> VY <del>Q</del> L <del>P</del> S <del>F</del> L <del>D</del> S <del>I</del> A <del>S</del> V <del>L</del> F <del>H</del> L <del>D</del> R <del>I</del> P <del>E</del> V <del>Y</del> T <del>P</del> V <del>L</del> ER <del>L</del> L <del>V</del> V <del>Q</del> I <del>D</del> S <del>F</del> P                           | 451 |
| LATIMERIA | LI <del>Q</del> R <del>C</del> K <del>Q</del> MYL <del>T</del> E <del>T</del> D <del>T</del> E <del>D</del> D <del>N</del> VY <del>Q</del> L <del>P</del> S <del>F</del> L <del>Q</del> S <del>I</del> A <del>S</del> V <del>L</del> F <del>H</del> I <del>D</del> R <del>I</del> P <del>E</del> V <del>Y</del> T <del>P</del> V <del>L</del> ER <del>L</del> L <del>V</del> V <del>Q</del> I <del>D</del> S <del>F</del> A                           | 448 |
| CAECIL    | LI <del>Q</del> R <del>C</del> K <del>Q</del> MYL <del>T</del> E <del>A</del> E <del>T</del> E <del>D</del> D <del>N</del> MY <del>Q</del> L <del>P</del> H <del>F</del> L <del>Q</del> S <del>I</del> A <del>S</del> V <del>I</del> V <del>H</del> M <del>D</del> S <del>I</del> P <del>E</del> V <del>Y</del> T <del>P</del> V <del>L</del> ER <del>L</del> L <del>V</del> V <del>Q</del> I <del>D</del> S <del>F</del> S                           | 453 |
| SNAKE     | LL <del>Q</del> R <del>C</del> K <del>Q</del> MYL <del>T</del> E <del>A</del> E <del>T</del> I <del>D</del> D <del>H</del> VY <del>Q</del> L <del>P</del> S <del>F</del> L <del>Q</del> S <del>I</del> A <del>S</del> V <del>I</del> F <del>H</del> L <del>D</del> T <del>I</del> P <del>E</del> I <del>Y</del> T <del>P</del> V <del>L</del> ER <del>L</del> M <del>I</del> V <del>Q</del> I <del>D</del> S <del>F</del> S                           | 451 |
| CANARY    | LL <del>Q</del> R <del>C</del> K <del>Q</del> M <del>F</del> L <del>T</del> E <del>A</del> E <del>T</del> I <del>D</del> D <del>H</del> L <del>Y</del> Q <del>L</del> P <del>S</del> F <del>L</del> Q <del>S</del> I <del>A</del> S <del>V</del> I <del>F</del> H <del>I</del> D <del>K</del> V <del>E</del> V <del>Y</del> T <del>P</del> V <del>L</del> E <del>H</del> L <del>V</del> V <del>L</del> Q <del>I</del> N <del>S</del> F <del>P</del>   | 443 |
| OSTRICH   | LL <del>Q</del> R <del>C</del> K <del>Q</del> MYL <del>T</del> E <del>A</del> E <del>T</del> V <del>D</del> D <del>H</del> IY <del>Q</del> L <del>P</del> S <del>F</del> L <del>Q</del> S <del>I</del> A <del>S</del> V <del>I</del> F <del>H</del> L <del>D</del> T <del>I</del> P <del>E</del> V <del>Y</del> T <del>P</del> V <del>L</del> ER <del>L</del> V <del>V</del> V <del>Q</del> I <del>D</del> T <del>F</del> P                           | 414 |
| GECKO     | LL <del>Q</del> R <del>C</del> K <del>Q</del> MYL <del>T</del> E <del>A</del> E <del>T</del> M <del>D</del> D <del>H</del> VY <del>Q</del> L <del>P</del> S <del>F</del> L <del>Q</del> S <del>I</del> A <del>S</del> V <del>I</del> F <del>H</del> L <del>D</del> T <del>I</del> P <del>E</del> V <del>Y</del> S <del>P</del> V <del>L</del> ER <del>L</del> I <del>V</del> V <del>Q</del> I <del>D</del> S <del>F</del> P                           | 451 |
| TURTLE    | LL <del>Q</del> R <del>C</del> K <del>Q</del> M <del>F</del> L <del>T</del> E <del>A</del> E <del>T</del> A <del>D</del> E <del>H</del> VY <del>Q</del> L <del>P</del> S <del>F</del> L <del>Q</del> S <del>I</del> A <del>S</del> V <del>I</del> F <del>H</del> I <del>D</del> T <del>I</del> P <del>E</del> V <del>Y</del> T <del>P</del> V <del>L</del> ER <del>L</del> I <del>V</del> V <del>Q</del> I <del>D</del> S <del>F</del> P              | 452 |
| ALLIGATOR | LL <del>Q</del> R <del>C</del> K <del>Q</del> MYL <del>T</del> E <del>A</del> E <del>T</del> A <del>D</del> D <del>N</del> VY <del>Q</del> L <del>P</del> S <del>C</del> L <del>Q</del> S <del>I</del> A <del>S</del> V <del>I</del> F <del>H</del> L <del>D</del> T <del>L</del> P <del>E</del> V <del>Y</del> T <del>P</del> V <del>L</del> E <del>H</del> L <del>I</del> V <del>M</del> Q <del>I</del> D <del>S</del> F <del>P</del>               | 412 |
| PLATYPUS  | LI <del>Q</del> R <del>C</del> K <del>Q</del> M <del>F</del> L <del>T</del> E <del>A</del> E <del>T</del> I <del>D</del> D <del>H</del> L <del>F</del> Q <del>L</del> P <del>S</del> F <del>L</del> Q <del>S</del> I <del>A</del> S <del>V</del> L <del>L</del> H <del>L</del> D <del>K</del> V <del>E</del> V <del>Y</del> T <del>P</del> V <del>L</del> ER <del>L</del> L <del>V</del> V <del>Q</del> I <del>D</del> S <del>F</del> P               | 447 |
| TASDEVIL  | LI <del>Q</del> R <del>C</del> K <del>Q</del> M <del>F</del> L <del>T</del> E <del>T</del> D <del>T</del> I <del>D</del> D <del>H</del> M <del>Y</del> Q <del>L</del> P <del>S</del> F <del>L</del> Q <del>S</del> I <del>A</del> S <del>I</del> L <del>L</del> H <del>L</del> D <del>T</del> V <del>P</del> E <del>V</del> Y <del>T</del> P <del>V</del> L <del>E</del> R <del>L</del> I <del>V</del> V <del>Q</del> I <del>D</del> N <del>F</del> P | 448 |
| HUMAN     | LI <del>Q</del> R <del>C</del> K <del>Q</del> M <del>F</del> L <del>T</del> Q <del>T</del> D <del>T</del> G <del>D</del> D <del>R</del> VY <del>Q</del> M <del>P</del> S <del>F</del> L <del>Q</del> S <del>V</del> A <del>S</del> V <del>L</del> L <del>Y</del> L <del>D</del> T <del>V</del> P <del>E</del> V <del>Y</del> T <del>P</del> V <del>L</del> E <del>H</del> L <del>V</del> V <del>M</del> Q <del>I</del> D <del>S</del> F <del>P</del>  | 447 |
| MOUSE     | LI <del>Q</del> R <del>C</del> K <del>Q</del> M <del>F</del> L <del>T</del> H <del>A</del> D <del>A</del> S <del>E</del> D <del>H</del> VY <del>Q</del> M <del>P</del> S <del>F</del> L <del>Q</del> S <del>I</del> A <del>S</del> V <del>L</del> L <del>Y</del> L <del>D</del> T <del>V</del> P <del>E</del> V <del>Y</del> T <del>P</del> V <del>L</del> E <del>H</del> L <del>M</del> V <del>V</del> Q <del>I</del> D <del>S</del> F <del>P</del>  | 447 |
|           | * : * : * : * : * : * : * : * : * : * : * : * : * : * : * : * : * : * : * : * : * : *                                                                                                                                                                                                                                                                                                                                                                 |     |

**N-TERMINAL UNIT**

Supplementary Figure 1. DNA-PKcs, jawed vertebrates

|           |         |                                           |                  |                   |
|-----------|---------|-------------------------------------------|------------------|-------------------|
| DANIO     | QYSQRMQ | HATCRSIVKVFVAMAVRGPVLWSFTSSVVHQGLIRVCSKPV | LQSDERGVSSGV     | 522               |
| MILII     | LYSARMQ | PICCRSIVKVFVALAGKGPVLWNFI                 | STVVHQGLIRVCSKPV | LLPGEGTGRSES 511  |
| BAMBOO    | LYSVRMQ | PVCCHSIIKLFIALAGKGPVLWSFI                 | STVVHQGLIRVCSKPV | LLPGEEMTKAEP 512  |
| XENOPUS   | QYSLKMQ | SSCCKAVLKVFLSLAGKGPVLWSLI                 | STVVHQGLIRVCSKPV | VLAQDG--KEGS 525  |
| STERLET   | QYSQRMQ | PVCCRSILKVFLALAGKGPVLWSFI                 | STVVHQGLIRVCSKPV | VLTGEEGG---Q 513  |
| GAR       | QYSQRMQ | PACCRAIVKVFVAMAGKGPALWSFI                 | STVVHQGLIRVCSKPV | LLTEEGAAQGA 511   |
| LATIMERIA | QYSQKMQ | PTCCRSIVKVFALAGKGPVLWSFI                  | STVVHQGLIRVCSKPV | PLSTEGIGKGG 508   |
| CAECIL    | QYSVKMQ | SVCCRSIIKVFALAGKGPVLWNFI                  | STVVHQGLIRVCSKPV | TLGKEGSGKGGSP 513 |
| SNAKE     | QYSARMQ | TACCRSIVKVFALAGKGPVLWSFM                  | STVVHQGLIRVCSKPL | VFSMDFGGKNIS 511  |
| CANARY    | QYTEKMQ | PVCCRSIIKVFLSLGGKGPVLWSFI                 | STVVHQGLIRVCSKPI | TFSKDFSVKETS 503  |
| OSTRICH   | QYSEKMQ | SVCCRSIVKVFALAGKGPILWSFI                  | STVVHQGLIRVCSKPI | TFKEYFGKKT 474    |
| GECKO     | QYSIKMQ | STCHKSIVKVFALAGKGPVLWSIM                  | STVVHQGLIRVCSKPL | AFLENSGTGVS 511   |
| TURTLE    | QYSVKMQ | SACCKSIVKVFALAGKGPVLWSFI                  | STVVHQGLIRVCSKPI | TFREIFGKEVS 512   |
| ALLIGATOR | RYSEKMQ | PVCCRSIVKVFALAGKGPVLWNFI                  | STVVHQGLIRVCSKPI | VFSREFDGGKAS 472  |
| PLATYPUS  | QYSIKMQ | SACCKAIVKVFALAGKGPVLWNFI                  | STVVHQGLIRVCSKPV | PFLKEAYGRDAS 507  |
| TASDEVIL  | QYSIKMQ | TICCRAIKVFALAEKGPILWNFI                   | STVVHQGLIRVCSKPV | ILQKEAFGKEVS 508  |
| HUMAN     | QYSPKMQ | LVCCRAIVKVFALAAKGPVLRNCI                  | STVVHQGLIRVCSKPV | VLPKGP----ES 503  |
| MOUSE     | QYSPKMQ | LVCCKAIKLFALAEKGPVHWNCI                   | SAVVHQGLIRVCSKPV | VLQKDV----ES 503  |

**N-TERMINAL UNIT**

|           |         |              |       |        |        |            |        |        |                     |                         |
|-----------|---------|--------------|-------|--------|--------|------------|--------|--------|---------------------|-------------------------|
| DANIO     | -----SQ | SEdstlvrsgk  | wkvps | skdyle | lfgll  | dcenlk     | dtgfvd | gapaak | nynlrdl             | 577                     |
| MILII     | --GL-   | QQSASEVMWTG  | kwr   | rvps   | kydyle | lfrsll     | ncgk   | mkef   | glv-dtl             | qminlpqsl 567           |
| BAMBOO    | WSSA-   | QQSLNNGMGTG  | kwr   | rvps   | kydyle | lfrsll     | dcmk   | esg    | liyetf              | qmfdsplksl 571          |
| XENOPUS   | EAE---  | TAAATGEVRAG  | k     | wk     | vpty   | kydyle     | lfrnll | rcdq   | lkdsif              | sdeifstvnspqsl 582      |
| STERLET   | GGG---  | QVKEGQVHTG   | k     | wk     | vpsyr  | dyldlfrnll | ecdk   | mdt    | gfvd                | gafdvrssslhsl 570       |
| GAR       | EGG---  | RSAGAGQVRTG  | k     | wk     | vpsyr  | dyldlfrsll | dcdl   | mkdf   | gfleg               | vfesqsapqsl 568         |
| LATIMERIA | QSEEEAD | PAAPGEVRTG   | k     | wk     | vpsyr  | kydyle     | lfrnll | ecdk   | lkqsal              | vdetfgvvnspqsl 568      |
| CAECIL    | GSE---  | EPPVAEEVRIG  | k     | wk     | vpty   | kydyle     | lfrsll | dcmk   | esif                | sdevf-svnspqsl 569      |
| SNAKE     | KSE---  | EYDSSGEVRTG  | k     | wk     | vpty   | kydyle     | lfrtll | gcdt   | mknil               | ladevclteysplqsl 568    |
| CANARY    | GTE---  | EAFEAGEVGTQ  | r     | s      | klpty  | kydyle     | lfrsll | scdt   | mk                  | esvfedanfltekaqlqsl 560 |
| OSTRICH   | GSE---  | ESPAAGEAGAG  | k     | wk     | vpty   | kydyle     | lfrsll | ncdt   | mk                  | esvledenflaansalksl 531 |
| GECKO     | ASE---  | EHPASGEVRSG  | k     | wk     | vpty   | kydyle     | lfrsll | scdt   | mk                  | dsladeetclmansplqsl 568 |
| TURTLE    | KLE---  | ESTTAGEVRTG  | k     | wk     | vpty   | kydyle     | lfrsll | ncdt   | mk                  | esvadeetfliansplls 569  |
| ALLIGATOR | KSE---  | EPPAVGEVRTG  | k     | wk     | vpsyr  | dyldlfrsll | ncdam  | kesv   | fadenfltvnspqsl 529 |                         |
| PLATYPUS  | ESD---  | DSSAFGEVRVGR | k     | wk     | vpty   | kydyle     | lfrsll | ncdem  | kdsq                | -detflivnspqsl 563      |
| TASDEVIL  | ESE---  | EYPSSGEVKTG  | k     | wk     | vptck  | kydyle     | lfrnll | scdq   | mk                  | dsladeetflvnspqsl 565   |
| HUMAN     | ESE---  | DHRASGEVRTG  | k     | wk     | vpty   | kydyle     | lfrhll | ssdq   | mm                  | dsiladeaffsvnssesl 560  |
| MOUSE     | RSD---  | NRSASEEVRTG  | r     | wk     | vpty   | kydyle     | lfrhll | gcdq   | medf                | ilgdetflfvnsslksl 560   |

**N-TERMINAL UNIT**





Supplementary Figure 1. DNA-PKcs, jawed vertebrates

|              |                                                                                                |
|--------------|------------------------------------------------------------------------------------------------|
| DANIO        | <b>QYFQ</b> QDKQCP-KQVGGSTMEN <b>ACFSL</b> LAKFGKE----- <b>VCVR</b> MKQYKDELLAACLMF 746        |
| MILII        | <b>NYFK</b> GVSTNTWKQCHTDPEK <b>CACF</b> ALFGKFGKE----- <b>VTIR</b> MKQYKDELLVSCLNF 739        |
| BAMBOO       | <b>KYFEG</b> VNPKTRKQCPKNPEK <b>ACF</b> ALFGKFGKE----- <b>VAIR</b> MKQYKDELLASCLTF 742         |
| XENOPUS      | <b>RYFEG</b> FTSKIYKKAPEDPER <b>LSCF</b> ALFAKFGKE----- <b>VSSK</b> IRQFKDELLASCLTF 753        |
| STERLET      | <b>KYFQ</b> GVSPRSCKTSPEDPKY <b>ACF</b> ALFAKFGKEVSTILGKE <b>VSVR</b> MKQYKDELLASCLTF 750      |
| GAR          | <b>KYFK</b> GVSPKSFQPNQDPEKY <b>ACF</b> ALFAKFGKE----- <b>VSVR</b> MKQYKDELLASCLTF 739         |
| LATIMERIA    | <b>KYFEG</b> VSSKSKQNSLDPEKY <b>ACF</b> ALFAKFGKE----- <b>VCAR</b> MKQYKDELLASCLGF 740         |
| CAECIL       | <b>KYFEG</b> VSPKSHKKCPKDPER <b>ACF</b> ALFAKFGKE----- <b>VSAR</b> MKQYKDELLASCLIF 741         |
| SNAKE        | <b>KYFAG</b> VSPSTKKYPEDPER <b>SSCF</b> ALFSKFGKE----- <b>VTTK</b> MKQYKDELLASCLTF 740         |
| CANARY       | <b>KYFED</b> ISPRSLRRCPEDPEK <b>SSCF</b> ALFVFKGKE----- <b>VAAK</b> MKQYKDELLASCLIF 731        |
| OSTRICH      | <b>KYFEG</b> VSPKSLRKC PEDPEK <b>SSCF</b> ALFLFKGKE----- <b>VTAK</b> MKQYKDELLASCLSF 702       |
| GECKO        | <b>KYFEG</b> VAPKSKKCPENPEK <b>SSCF</b> ALFAKFGKE----- <b>VTAK</b> MKQYKDELLASCLIF 740         |
| TURTLE       | <b>KYFEG</b> VSPKSYQKCPDDPEK <b>SSCF</b> ALFAKFGKE----- <b>VTAK</b> MKQYKDELLASCLTF 740        |
| ALLIGATOR    | <b>KYFED</b> VSPGTQKKYPEDPEK <b>SSCF</b> ALFAKFGKE----- <b>VAAK</b> MKQYKDELLASCLTF 700        |
| PLATYPUS     | <b>KYFEG</b> VSPRSLKSPEDPEKY <b>SCF</b> ALFAKFGKE----- <b>VAVK</b> MKQYKDELLASCLTF 734         |
| TASDEVIL     | <b>RYFEG</b> LSPKSHKKSPEDPEKY <b>SCF</b> ALFAKFGKE----- <b>VSIK</b> MKQYKDELLASCLNF 737        |
| <b>HUMAN</b> | <b>KYFEG</b> VSPKSLKHSPEDPEKY <b>SCF</b> ALFVFKGKE----- <b>VAVK</b> MKQYKDELLASCLTF <b>732</b> |
| MOUSE        | <b>KYFEG</b> ISPKSLKHSPEDTEKY <b>SCF</b> ALFAKFGKE----- <b>VSVK</b> MKQYKDELLASCLTF 731        |
|              | . ** .. : . . :***: ***** * :::*:*****:*** *                                                   |

**N-TERMINAL UNIT**

|              |                                                                                                  |
|--------------|--------------------------------------------------------------------------------------------------|
| DANIO        | <b>ILSL</b> HPGMVALDIKAYIPALQ <b>AALR</b> LGLSHAPLATAALDALESWSF <b>IPAI</b> LQPHYTDI 806         |
| MILII        | <b>VLSP</b> HDIIELDIKAYIPALQ <b>AAFK</b> LGLSHTPLADAGLDALEDWSAH <b>IPKH</b> IQPHYKDI 799         |
| BAMBOO       | <b>VLSP</b> PYDIIELDIKTFIPALQ <b>TAFK</b> LGLSHIPLADAGLDALEHWS <b>TRIS</b> KHVIIEPYKDI 802       |
| XENOPUS      | <b>VLHL</b> PHDIIIMDIKAYIPALQ <b>TAFK</b> LGLSCPPLADVGLNALQYWS <b>TNIP</b> SDILKPYKDI 813        |
| STERLET      | <b>VLSP</b> PHDIVALDIKAYIPALQ <b>NSFK</b> LGLSHTPLANTGLYALENWS <b>QFIP</b> KYVMQPHYKDI 810       |
| GAR          | <b>VLSP</b> HHDIVALDIKAYVPALQ <b>TALK</b> LGLSHTPLASAALDALEEWS <b>SRI</b> SQPLIQPLYRDV 799       |
| LATIMERIA    | <b>ILSL</b> PHTIIVELDVKAYIPALQ <b>MAFK</b> LGLSYTPLADSGLDALEEWS <b>NRIP</b> KWVLPQYYKEI 800      |
| CAECIL       | <b>ILSL</b> PHDIIIMLDIKAYIPALQ <b>TAFK</b> LGLSYSPLADAGLDALEDWS <b>AYIP</b> QYVIQPHYSEI 801      |
| SNAKE        | <b>VLSP</b> PYNIIMLDIKAYIPALQ <b>NAFK</b> LGLSYTPMADVALDALEDWS <b>SYIP</b> RNIIQPYKDI 800        |
| CANARY       | <b>LLSP</b> PHDIIIMLDIKAYIPALQ <b>NAFK</b> LGLSCTPMADLGLDALEDWS <b>AHIP</b> RHMQPYKDV 791        |
| OSTRICH      | <b>LLSP</b> PPDIIIMLDIKAYIPALQ <b>NAFK</b> LGLSCIPMADLGLDALEDWS <b>AHIP</b> KHMQPYKDV 762        |
| GECKO        | <b>VLSP</b> PHDIIIMLDIKAYIPALQ <b>NAFK</b> LGLSYTPMAEVALDALEDWS <b>AHIP</b> RYTMQPYKDI 800       |
| TURTLE       | <b>VLSP</b> PHDIIIMLDIKAYIPALQ <b>NAFK</b> LGLSYTPMADEGLDALEDWS <b>AYIP</b> KHMQPYKDV 800        |
| ALLIGATOR    | <b>VLSP</b> PHDIIIMLDIKAYVPALQ <b>NAFK</b> LGLSYTPMADVALSALEDWS <b>SHIP</b> KNMQPYKDV 760        |
| PLATYPUS     | <b>VLCL</b> PHDIIIMLDIKAYIPALQ <b>MAFK</b> LGLSYPLADVGLNALEEWS <b>IYIP</b> RHVIQPYKDI 794        |
| TASDEVIL     | <b>VLCL</b> PHDIIELDIKAYVPALQ <b>MAFK</b> LGLSYTPLAEVGLNALEEWS <b>LYIP</b> KHTIQPYKDI 797        |
| <b>HUMAN</b> | <b>LLSP</b> PHNIIELDVRAYVPALQ <b>MAFK</b> LGLSYTPLAEVGLNALEEWS <b>IYID</b> RHVMQPYKDI <b>792</b> |
| MOUSE        | <b>VLSP</b> PHDIIELDVRAYVPALQ <b>MAFK</b> LGLSHMPLAEIGLHALKEWS <b>VHID</b> KSILQPYKDI 791        |
|              | :* * :: :*:::***** :***** :* . * **: ** * :::* * :                                               |

**N-TERMINAL UNIT**



Supplementary Figure 1. DNA-PKcs, jawed vertebrates

|              |                                                                                                                                                                                                                                                                           |            |
|--------------|---------------------------------------------------------------------------------------------------------------------------------------------------------------------------------------------------------------------------------------------------------------------------|------------|
| DANIO        | <b>LP</b> HL <b>DGYL</b> K <b>T</b> TS <b>SSEK</b> DD <b>S</b> N <b>MEV</b> TF <b>V</b> ST <b>GSS</b> <b>KGY</b> Q <b>V</b> LL <b>RLL</b> <b>KK</b> S <b>KRF</b> SL <b>GDE</b> S <b>PIA</b> AV <b>R</b>                                                                   | 866        |
| MILII        | <b>LP</b> HL <b>DGYL</b> K <b>T</b> AA <b>F</b> - <b>NEA</b> Q <b>NN</b> W <b>EG</b> M <b>N</b> I <b>NN</b> PS <b>R</b> <b>KG</b> S <b>KV</b> LF <b>HHT</b> <b>KK</b> S <b>K</b> E <b>FL</b> VE <b>SD</b> SA <b>IT</b> AV <b>R</b>                                        | 858        |
| BAMBOO       | <b>LP</b> HL <b>DGYL</b> K <b>T</b> AA <b>S</b> - <b>NEF</b> ES <b>N</b> W <b>EM</b> M <b>NT</b> - <b>SS</b> <b>KG</b> N <b>KV</b> L <b>IR</b> RL <b>KN</b> AR <b>DL</b> SM <b>SE</b> ET <b>PA</b> AA <b>V</b> <b>K</b>                                                   | 860        |
| XENOPUS      | <b>IP</b> LL <b>DGYL</b> T <b>N</b> LS <b>ST</b> NE <b>SL</b> ST <b>LD</b> M <b>V</b> RI <b>S</b> RL <b>H</b> <b>KG</b> F <b>N</b> K <b>Q</b> LI <b>Q</b> QL <b>KRM</b> K <b>T</b> SV <b>KE</b> ES <b>SL</b> T <b>AV</b> <b>R</b>                                         | 873        |
| STERLET      | <b>LP</b> Y <b>LDG</b> FL <b>K</b> T <b>AS</b> N <b>DEE</b> Q <b>NN</b> W <b>EV</b> MS <b>LS</b> R <b>ST</b> E <b>KGY</b> GR <b>V</b> LM <b>RLL</b> <b>KK</b> A <b>KRF</b> SL <b>TED</b> S <b>P</b> T <b>AL</b> V <b>R</b>                                                | 870        |
| GAR          | <b>LP</b> CL <b>DGYL</b> K <b>T</b> AA <b>S</b> NG <b>SD</b> Q <b>NT</b> W <b>EV</b> M <b>CL</b> SS <b>GAE</b> <b>KGY</b> GR <b>V</b> LL <b>RLL</b> <b>KRT</b> K <b>HLS</b> MA <b>ED</b> SP <b>SA</b> V <b>R</b>                                                          | 859        |
| LATIMERIA    | <b>LP</b> CL <b>DGYL</b> K <b>T</b> SI <b>SAG</b> DT <b>PS</b> S <b>WE</b> VL <b>RL</b> S <b>RAS</b> Q <b>KG</b> D <b>H</b> K <b>V</b> L <b>IR</b> LL <b>KK</b> A <b>KAV</b> SL <b>NED</b> SS <b>L</b> G <b>AV</b> <b>R</b>                                               | 860        |
| CAECIL       | <b>LP</b> Y <b>LDG</b> Y <b>L</b> K <b>T</b> ASS <b>AD</b> E <b>Y</b> Q <b>NS</b> W <b>EV</b> M <b>RL</b> S <b>R</b> AA <b>Q</b> <b>KG</b> F <b>N</b> R <b>FL</b> V <b>Q</b> RL <b>KK</b> T <b>KT</b> LS <b>L</b> D <b>Q</b> D <b>V</b> SL <b>AS</b> <b>IR</b>            | 861        |
| SNAKE        | <b>VP</b> CL <b>DS</b> Y <b>L</b> K <b>T</b> S <b>AST</b> DE <b>S</b> Q <b>NN</b> LE <b>V</b> KK <b>LS</b> K <b>AI</b> Q <b>KG</b> M <b>N</b> K <b>V</b> V <b>I</b> Q <b>HL</b> <b>KK</b> S <b>KN</b> LE <b>AD</b> PS <b>LE</b> AV <b>R</b>                               | 860        |
| CANARY       | <b>LP</b> LL <b>DGYL</b> K <b>S</b> ST <b>ST</b> VE <b>S</b> Q <b>NN</b> W <b>EV</b> R <b>K</b> LS <b>Q</b> AA <b>Q</b> <b>KGR</b> N <b>K</b> V <b>V</b> I <b>Q</b> R <b>IR</b> RA <b>K</b> T <b>LS</b> V <b>D</b> NS <b>PS</b> L <b>Q</b> AV <b>R</b>                    | 851        |
| OSTRICH      | <b>LP</b> LL <b>DGYL</b> K <b>N</b> S <b>AST</b> VE <b>P</b> Q <b>D</b> N <b>W</b> EV <b>R</b> K <b>I</b> S <b>R</b> AA <b>Q</b> <b>KG</b> F <b>N</b> K <b>V</b> V <b>I</b> Q <b>HL</b> RR <b>A</b> K <b>T</b> SL <b>-</b> VG <b>D</b> PS <b>LE</b> AV <b>R</b>           | 821        |
| GECKO        | <b>LP</b> CL <b>DGYL</b> K <b>T</b> ST <b>ST</b> DD <b>S</b> Q <b>NN</b> W <b>EV</b> KK <b>LS</b> Q <b>AV</b> Q <b>KS</b> N <b>K</b> V <b>V</b> I <b>Q</b> RL <b>KK</b> A <b>K</b> SL <b>A</b> LE <b>ED</b> H <b>S</b> LE <b>A</b> <b>IR</b>                              | 860        |
| TURTLE       | <b>LP</b> PL <b>FD</b> G <b>Y</b> L <b>K</b> T <b>T</b> GS <b>AD</b> ES <b>Q</b> NN <b>W</b> EV <b>R</b> K <b>LS</b> R <b>AA</b> Q <b>KG</b> F <b>N</b> K <b>V</b> V <b>I</b> Q <b>RL</b> <b>KK</b> A <b>K</b> T <b>LS</b> L <b>ED</b> N <b>L</b> S <b>LE</b> AV <b>R</b> | 860        |
| ALLIGATOR    | <b>LP</b> LL <b>DGYL</b> K <b>T</b> AT <b>SP</b> DE <b>F</b> Q <b>NN</b> W <b>EV</b> KK <b>LS</b> Q <b>AV</b> Q <b>KG</b> F <b>N</b> K <b>V</b> V <b>I</b> Q <b>RL</b> <b>KK</b> A <b>K</b> AL <b>SL</b> N <b>ED</b> L <b>S</b> LE <b>AM</b> <b>R</b>                     | 820        |
| PLATYPUS     | <b>LP</b> CL <b>DS</b> Y <b>L</b> K <b>T</b> T <b>AL</b> S <b>DE</b> T <b>K</b> N <b>ME</b> V <b>T</b> ML <b>S</b> R <b>AT</b> Q <b>KG</b> F <b>N</b> K <b>V</b> V <b>R</b> HL <b>KK</b> A <b>K</b> AT <b>AP</b> VE <b>D</b> L <b>S</b> LE <b>S</b> V <b>R</b>            | 854        |
| TASDEVIL     | <b>LP</b> CL <b>DS</b> Y <b>L</b> K <b>T</b> T <b>AL</b> S <b>DD</b> N <b>K</b> D <b>NE</b> EV <b>T</b> VL <b>S</b> R <b>AA</b> Q <b>KG</b> F <b>N</b> K <b>V</b> V <b>I</b> K <b>HL</b> <b>KK</b> S <b>K</b> T <b>IL</b> S <b>DA</b> EM <b>S</b> LE <b>AV</b> <b>R</b>   | 857        |
| <b>HUMAN</b> | <b>LP</b> CL <b>DGYL</b> K <b>T</b> S <b>ALS</b> DE <b>T</b> K <b>NN</b> W <b>EV</b> S <b>ALS</b> R <b>AA</b> Q <b>KG</b> F <b>N</b> K <b>V</b> V <b>L</b> K <b>HL</b> <b>KK</b> T <b>KN</b> L <b>SS</b> NE <b>A</b> IS <b>LE</b> E <b>IR</b>                             | <b>852</b> |
| MOUSE        | <b>LP</b> CL <b>DGYL</b> N <b>T</b> ST <b>L</b> S <b>DE</b> T <b>K</b> SH <b>W</b> GL <b>S</b> ALS <b>R</b> AA <b>Q</b> <b>KG</b> F <b>N</b> R <b>H</b> V <b>V</b> K <b>HL</b> <b>KR</b> T <b>R</b> NS <b>SP</b> DE <b>AL</b> S <b>LE</b> E <b>IR</b>                     | 851        |
|              | : * : * : * . . : : * * : : : : : : : :                                                                                                                                                                                                                                   |            |

**N-TERMINAL UNIT**

|              |                                                                                                                                                                                                                                                                              |            |
|--------------|------------------------------------------------------------------------------------------------------------------------------------------------------------------------------------------------------------------------------------------------------------------------------|------------|
| DANIO        | RR <b>V</b> VR <b>LL</b> GH <b>L</b> GG <b>Q</b> L <b>NR</b> SL <b>V</b> T <b>AV</b> SA <b>ED</b> MM <b>K</b> R <b>F</b> VA <b>W</b> DC <b>E</b> K <b>R</b> LS <b>F</b> AV <b>PF</b> K <b>D</b> M <b>K</b> P <b>V</b> I <b>Y</b> L <b>D</b> S <b>F</b> LP                    | 926        |
| MILII        | RR <b>V</b> VR <b>LL</b> GS <b>L</b> GG <b>Q</b> N <b>NR</b> SL <b>V</b> T <b>AV</b> SA <b>E</b> EM <b>K</b> R <b>C</b> I <b>AW</b> VT <b>E</b> K <b>PL</b> S <b>F</b> AV <b>PF</b> M <b>D</b> M <b>K</b> P <b>I</b> I <b>Y</b> L <b>D</b> S <b>F</b> IP                     | 918        |
| BAMBOO       | KR <b>V</b> VR <b>LL</b> GS <b>L</b> GG <b>Q</b> I <b>NR</b> SL <b>V</b> A <b>AT</b> S <b>SE</b> EM <b>K</b> C <b>V</b> AW <b>VA</b> ER <b>PL</b> S <b>F</b> AV <b>PF</b> AD <b>M</b> K <b>P</b> V <b>I</b> Y <b>L</b> D <b>S</b> FL <b>P</b>                                | 920        |
| XENOPUS      | NR <b>V</b> VR <b>IL</b> GS <b>L</b> GG <b>Q</b> I <b>NR</b> SL <b>V</b> T <b>AA</b> ST <b>EE</b> M <b>I</b> K <b>R</b> H <b>V</b> SW <b>D</b> T <b>E</b> K <b>RL</b> R <b>F</b> D <b>V</b> PF <b>K</b> D <b>L</b> K <b>P</b> V <b>I</b> Y <b>L</b> D <b>M</b> FL <b>P</b>   | 933        |
| STERLET      | RR <b>V</b> VR <b>LL</b> GH <b>L</b> GG <b>Q</b> I <b>NR</b> SL <b>V</b> T <b>AT</b> SA <b>E</b> EM <b>M</b> K <b>F</b> VA <b>W</b> D <b>S</b> E <b>K</b> RL <b>N</b> F <b>AV</b> PF <b>AD</b> M <b>K</b> P <b>V</b> I <b>Y</b> L <b>D</b> T <b>F</b> LP                     | 930        |
| GAR          | RR <b>V</b> VR <b>LL</b> GH <b>L</b> GG <b>Q</b> L <b>NR</b> SL <b>V</b> T <b>AA</b> SA <b>E</b> EM <b>M</b> K <b>F</b> VA <b>W</b> D <b>S</b> E <b>K</b> RL <b>T</b> F <b>AV</b> PF <b>AD</b> M <b>K</b> P <b>V</b> I <b>Y</b> L <b>D</b> A <b>F</b> LP                     | 919        |
| LATIMERIA    | GR <b>V</b> VR <b>VL</b> GS <b>L</b> GG <b>Q</b> V <b>NR</b> SL <b>V</b> T <b>AA</b> SS <b>E</b> EM <b>M</b> K <b>F</b> V <b>SW</b> D <b>T</b> E <b>K</b> RL <b>S</b> F <b>AV</b> PF <b>AD</b> M <b>K</b> P <b>V</b> I <b>Y</b> L <b>D</b> S <b>F</b> LP                     | 920        |
| CAECIL       | NR <b>V</b> V <b>Q</b> IL <b>GS</b> L <b>GG</b> Q <b>I</b> N <b>Q</b> SL <b>V</b> T <b>AS</b> CA <b>E</b> EM <b>M</b> K <b>K</b> V <b>SW</b> D <b>T</b> E <b>K</b> RL <b>S</b> F <b>AV</b> PF <b>V</b> D <b>M</b> K <b>P</b> I <b>I</b> Y <b>L</b> D <b>S</b> FL <b>P</b>    | 921        |
| SNAKE        | AR <b>V</b> VR <b>LL</b> GT <b>L</b> GG <b>Q</b> I <b>NR</b> HL <b>I</b> T <b>GT</b> SA <b>E</b> E <b>M</b> K <b>K</b> F <b>V</b> SW <b>D</b> I <b>E</b> K <b>HL</b> N <b>F</b> AV <b>PF</b> V <b>D</b> M <b>K</b> P <b>I</b> I <b>Y</b> L <b>D</b> L <b>F</b> LP            | 920        |
| CANARY       | TR <b>V</b> AR <b>LL</b> GS <b>L</b> GG <b>Q</b> I <b>N</b> HN <b>L</b> I <b>T</b> AT <b>SA</b> E <b>E</b> M <b>M</b> K <b>K</b> C <b>V</b> SW <b>D</b> T <b>E</b> K <b>H</b> LS <b>F</b> AV <b>PF</b> AD <b>M</b> K <b>P</b> V <b>I</b> Y <b>L</b> D <b>L</b> FL <b>P</b>   | 911        |
| OSTRICH      | TR <b>V</b> AR <b>LL</b> GS <b>L</b> GG <b>Q</b> I <b>N</b> HN <b>L</b> I <b>T</b> AT <b>SA</b> E <b>E</b> M <b>M</b> K <b>K</b> C <b>V</b> SW <b>D</b> T <b>E</b> K <b>RL</b> S <b>F</b> AV <b>PF</b> AD <b>M</b> K <b>P</b> V <b>I</b> Y <b>L</b> D <b>L</b> FL <b>P</b>   | 881        |
| GECKO        | MR <b>V</b> AC <b>LL</b> GS <b>L</b> GG <b>Q</b> I <b>NR</b> N <b>L</b> V <b>T</b> AA <b>SA</b> E <b>E</b> R <b>M</b> K <b>K</b> F <b>V</b> SW <b>D</b> T <b>E</b> K <b>H</b> LS <b>F</b> AV <b>PF</b> AD <b>M</b> K <b>P</b> V <b>I</b> Y <b>L</b> D <b>V</b> FL <b>P</b>   | 920        |
| TURTLE       | TR <b>V</b> VR <b>LL</b> GS <b>L</b> GG <b>Q</b> I <b>NR</b> N <b>LL</b> T <b>AA</b> ST <b>EE</b> M <b>M</b> K <b>K</b> F <b>V</b> SW <b>D</b> T <b>E</b> K <b>H</b> LS <b>F</b> AV <b>PF</b> AD <b>M</b> K <b>P</b> V <b>I</b> Y <b>L</b> D <b>L</b> FL <b>P</b>            | 920        |
| ALLIGATOR    | SR <b>V</b> V <b>Q</b> LL <b>GS</b> L <b>GG</b> Q <b>V</b> NR <b>SL</b> V <b>T</b> AA <b>SS</b> E <b>E</b> EM <b>M</b> K <b>K</b> F <b>V</b> SW <b>D</b> S <b>E</b> K <b>HL</b> N <b>F</b> AV <b>PF</b> V <b>D</b> M <b>K</b> P <b>V</b> I <b>Y</b> L <b>D</b> I <b>F</b> LP | 880        |
| PLATYPUS     | TR <b>V</b> VR <b>LL</b> GS <b>L</b> GG <b>Q</b> I <b>NR</b> N <b>I</b> V <b>T</b> AA <b>SA</b> DE <b>M</b> M <b>K</b> C <b>V</b> AW <b>D</b> T <b>E</b> K <b>RL</b> S <b>F</b> AV <b>PF</b> A <b>E</b> M <b>K</b> P <b>V</b> I <b>Y</b> L <b>D</b> V <b>F</b> LP            | 914        |
| TASDEVIL     | A <b>Q</b> V <b>IR</b> VL <b>GS</b> L <b>GG</b> Q <b>I</b> NR <b>N</b> L <b>V</b> T <b>AA</b> SS <b>D</b> E <b>I</b> M <b>K</b> CL <b>AW</b> D <b>S</b> E <b>K</b> KL <b>S</b> F <b>AV</b> PF <b>A</b> E <b>M</b> K <b>P</b> V <b>I</b> Y <b>L</b> D <b>V</b> FL <b>P</b>    | 917        |
| <b>HUMAN</b> | <b>IR</b> V <b>V</b> Q <b>ML</b> GS <b>L</b> GG <b>Q</b> I <b>N</b> KN <b>LL</b> T <b>V</b> T <b>SS</b> DE <b>M</b> K <b>S</b> Y <b>VA</b> W <b>D</b> R <b>E</b> K <b>RL</b> S <b>F</b> AV <b>PF</b> R <b>E</b> M <b>K</b> P <b>V</b> I <b>F</b> L <b>D</b> V <b>F</b> LP    | <b>912</b> |
| MOUSE        | I <b>K</b> V <b>V</b> Q <b>IL</b> GS <b>L</b> GG <b>Q</b> I <b>N</b> K <b>SL</b> V <b>T</b> AT <b>S</b> - <b>GER</b> M <b>K</b> K <b>Y</b> VA <b>W</b> DA <b>ER</b> RL <b>S</b> F <b>AV</b> PF <b>R</b> E <b>M</b> K <b>P</b> V <b>I</b> Y <b>L</b> D <b>V</b> FL <b>P</b>   | 910        |
|              | : : : * * * * * * : : : . : : * : * * * * * : : * * * * * * * * :                                                                                                                                                                                                            |            |

**N-TERMINAL UNIT**      **FOREHEAD**

Supplementary Figure 1. DNA-PKcs, jawed vertebrates

|              |                                                                     |            |
|--------------|---------------------------------------------------------------------|------------|
| DANIO        | RVTELALSSSDRQTKVAACELLHSLVIYMGKGAQMTEDD-KSAPPMYNLHRKVFVPLL          | 985        |
| MILII        | RISELALSASDRQTKVAACELLHSVVAYTLGKGSQISEGQ---QETLYKLNRLFPVLL          | 975        |
| BAMBOO       | RITELALSASDRQTKVAACELLHSVVAYMLGKGSQIAEGQ---QETMYKLNRLHLYPVLL        | 977        |
| XENOPUS      | HITELALSTSDRQTKVAACELLHSIVAFMLGKATQMPDDKKTGSSPMYKIYKRTFPVLL         | 993        |
| STERLET      | RITELALSTNDRQTKVAACELLHSVVVFMFLGKGSQIPEGE-KSTPPMYRLYKRIFPVLL        | 989        |
| GAR          | RITELALSTSDRQTKVAACELLHSVVVCMFLGKGSQIPEGE-KSSPPMYKLHKRIFPVLL        | 978        |
| LATIMERIA    | RIAEALALSSSDRQTKVAACELLHSVVVYMLGKGSQIPERC-GGVPPMYRLYKRIFPVLL        | 979        |
| CAECIL       | RVTELALSTSDRQTKVAACELLHSMVVYMLGKASQMPEKD-QSLPPMYQLYKRTFPVLL         | 980        |
| SNAKE        | RVTELALCASDRQTKVAACELLHSIVMFMLGKAAQIPEGH-KNSPPLFHLYKRMFPVLL         | 979        |
| CANARY       | HVTELALSASDRQTKVAACELLHGIVTYMLGKASQMPEGC-QGPPPMYHLHKRVPVLL          | 970        |
| OSTRICH      | RVTELALSASDRQAKVAACELLHSIVAYMLGKASQMPEGC-QGPPPMYQLYKRIFPVLL         | 940        |
| GECKO        | RVTELALSASDRQTKVAACELLHSMVMYVLGKAAQIPEGQ-EVSQPMSHLYKRTFPILL         | 979        |
| TURTLE       | RVTELALSASDRQTKVAACELLHSIVMYMLGTASQMPDGP-PGSPPMYQLYKRMFPVLL         | 979        |
| ALLIGATOR    | RVTELALSASDRQTKVAACELLHGLVMFMLGKASQMPEGR-QGSSPMYQLYKRTFPVLL         | 939        |
| PLATYPUS     | RITELALSASDRQTKVAACEVLHSIVMFMLGKASQIPEGN-QGSPPMYQLYKRTFPVLL         | 973        |
| TASDEVIL     | RVTELALSSSDRQTKIAACELLHSMVMFMLGKASQIPEGK-LGPPPMYQLYKRTFPVLL         | 976        |
| <b>HUMAN</b> | <b>RVTELALTASDRQTKVAACELLHSMVMFMLGKATQMPGEGG-QGAPPMYQLYKRTFPVLL</b> | <b>971</b> |
| MOUSE        | RVTELALSASDRQTKVAACELLHSMVMFMLGRATQMPGEGG-QGLPPMYQLYKHTFPVLL        | 968        |
|              | :::**** :.***:*:*:*:*:*:*:* :* :*:: : :. : : :*:*:                  |            |

FOREHEAD

|              |                                                                     |             |
|--------------|---------------------------------------------------------------------|-------------|
| DANIO        | LACDQVTRQLFEPVLMQLIHWFNTNRRKFESQDTVAVLEAILDGIVDPLDSTLRDFSGT         | 1045        |
| MILII        | LGCDVDTVTRQLFEPVLMQLIHWFNTNRRKFESRDTVAMLEAILDGIVDPVDSSTLRDFCGQ      | 1035        |
| BAMBOO       | LGCDVDKVTNQLFEPVLMQLIHWFNTNRRKFESRDTVAMLEAILDGIVDPVDSSTLRDFCGN      | 1037        |
| XENOPUS      | LACDQVTRQLYKPLVMSLIHWFTNRRKFESQDTVAMLEAILTGIVDPVDSSTLRDFCGQ         | 1053        |
| STERLET      | LACDQVTRQLYEPVLMQLIHWFNTNRRKFESQDTVAMLEAILDGIVDPVDSSTLRDFCGQ        | 1049        |
| GAR          | LACDQVTRQLYEPVLMQLIHWFNTNRRKFESQDTVAILEAILDGIVDPVDSSTLRDFCGQ        | 1038        |
| LATIMERIA    | LACDQVTRQLYEPVLMQLIHWFNTNRRKFESQDTVAMLEAIMDGIVDPIDSTLRDFCGL         | 1039        |
| CAECIL       | LACDQVTRQLYEPVLMGLIHWFNTNRRKFESQDTVAMLEAILDGIVDPVDSSTLRDFCGH        | 1040        |
| SNAKE        | LACDQVTRQLYGTLMELIHWFNTNRRKFESQDTVTLLEAILDGIVDPVDSSTLRDFCGQ         | 1039        |
| CANARY       | LACDIDQVARQLYEPVLMQLIHWFNTNRRKFESQDTVAFLEAMLSGIVDPVDSSTLRDFCGQ      | 1030        |
| OSTRICH      | LACDQVTRQLYEPVLMQLIHWFNTNRRKFESQDTVAFLEAILGGITDPVDSSTLRDFCGQ        | 1000        |
| GECKO        | LACDQVTRQLYEPVLMQLIHWFNTNRRKFESQDTVTLLEAILDGIVDPVDSSTLRDFCGR        | 1039        |
| TURTLE       | LACDQVTRQLYKLLVMEIHWFNTNRRKFESQDTVAMLEAILDGIVDPVDSSTLRDFCGQ         | 1039        |
| ALLIGATOR    | LACDQVTRQLYEPVLMQLIHWFNTNRRKFESQDTVAMLEAILDGIVDPVDSSTLRDFCGQ        | 999         |
| PLATYPUS     | LACDQVTRQLYEPVLMQLIHWFNTNRRKFESQDTVAMLEAILDGIVDPVDSSTLRDFCGQ        | 1033        |
| TASDEVIL     | LACDQVTRQLYEPVLMQLIHWFNTNRRKFESQDTMTLLETILDGIVDPVDSSTLRDFCGQ        | 1036        |
| <b>HUMAN</b> | <b>LACDQVTRQLYEPVLMQLIHWFNTNRRKFESQDTVAMLEAILDGIVDPVDSSTLRDFCGR</b> | <b>1031</b> |
| MOUSE        | LACDQVTRQLYEPVLMQLIHWFNTNRRKFESQDTVAMLEAILDGIVDPVDSSTLRDFCGR        | 1028        |
|              | *.***: *.:*:*: **: ****:*:* ****:*:*:*:*:*:*:*: *.:***:*:*:*:*:*.*  |             |

FOREHEAD

Supplementary Figure 1. DNA-PKcs, jawed vertebrates

|              |                                                                     |             |
|--------------|---------------------------------------------------------------------|-------------|
| DANIO        | CIQEFVKWSIKQTPPKQEEKSPANMKSFLFKRILYSLALHPSVFKRLGAALAFNSMYRQFRE      | 1105        |
| MILII        | CVREFLKWSIKQTPPEQQAKSPANTKSLFKRLYSLALHPNTFKRLGAALAFNSLYREFRQ        | 1095        |
| BAMBOO       | CVREFLKWSIKQTPPEQQQKSPVNTKSLFKRLYSLALHPNTFKRLGAALAFNSLYREFRE        | 1097        |
| XENOPUS      | CIQEFLRWSIKQTPDQQAQKSPVNTTSLFKRLYSLALHPNAFKRLGAALAFNNIYRDFRE        | 1113        |
| STERLET      | CVQEFMLWSIKQTPPKQEEKSPANTKSLFKRLYSLALHPNVFKRLGAALSFNSIYRQFRE        | 1109        |
| GAR          | CIQEFVKWSIKQTPPKQEEKSPANTKSLFKRLYSLALHPNVFKRLGAALAFNNIYKQFRE        | 1098        |
| LATIMERIA    | CIQEFVKWSIKQTPPKQESTPANTKSLFKRLYSLALHPGAFKRLGAALAFNNLYKEFRE         | 1099        |
| CAECIL       | CIREFLKWSIKQKTPQQMEKSPVNTKSLFKRLYSLALHPNAFKRLGAALAFNNIYREFRE        | 1100        |
| SNAKE        | CVHEFLKWSIKQTPPQQEEKSPVNTKSLFKRLYSLALHPNAFKRLGASLAFNNIYQEFRE        | 1099        |
| CANARY       | CIREFLKWSIKQTPRQQEESPANTKSLFKRLYSLALHPSAFKRLGAALAFNSIYREFRE         | 1090        |
| OSTRICH      | CVREFLKWSIKQTPPKQEEKSPVNTKSLFKRLYSLALHPSAFKRLGAALAFNSIYREFRE        | 1060        |
| GECKO        | CVREFLKWSIKQTPPQQERSPVNTKSLFKRLYSLALHPNAFKRLGAALAFNSIYREFRE         | 1099        |
| TURTLE       | CVREFMKWSIKQTPPQQEEKSPVNTKSLFKRLYSLALHPNALKRLGAALAFNNIYREFRE        | 1099        |
| ALLIGATOR    | CIREFMKWSIKQTPPQQEEKSPVNTKSLFKRLYSLALHPNAFKRLGAALAFNNIYREFRE        | 1059        |
| PLATYPUS     | CVREFLKWSIKQTPPEQQEEKSPVNTKSLFKRLYSLALHPNPFKRLGAALAFNNIYREFRE       | 1093        |
| TASDEVIL     | CVREFLKWSIKQTPPQQEEKSPVNTKSLFKRLYSLALHPNAFKRLGAALAFNNIYREFRE        | 1096        |
| <b>HUMAN</b> | <b>CIREFLKWSIKQITPQQEEKSPVNTKSLFKRLYSLALHPNAFKRLGASLAFNNIYREFRE</b> | <b>1091</b> |
| MOUSE        | CVQEFVKWSIKQTPPQQEEKSPVNSKSLFKRLYSLALHPNAFKRLGAALAFNNHIYKEFRE       | 1088        |

\*:\*\*\*: \*\*\*\*\* \*\* \* :\*. \* .\*\*\*\*\*:\*\* \*\*\*\*. :\*\*\*\*\*:\*\*\* :\*:\*\*\*:

FOREHEAD

|              |                                                                       |             |
|--------------|-----------------------------------------------------------------------|-------------|
| DANIO        | ESSLVEQFVFEVLVVVFVESLALAHFDEKSVGTVQQCCSSLDHLKRRIIKHKADSLN--INS        | 1163        |
| MILII        | ESALVDQFIFEVLVVYVESLALAHADDNSLGTVQQCCDAIDHLNRRIIKQKASALN--KPI         | 1153        |
| BAMBOO       | ESALVEQFVFEVLVVYVESLALAHADDKSLGTIQQCCDCINHLKRRIIKQKAHELN--KPV         | 1155        |
| XENOPUS      | ETALVENFVFEVLVIYMESLALASHADEKSLGTQQCCSDAVDHLKRRIIRKAASLN--KAT         | 1171        |
| STERLET      | ESTLVDQFIFELLVIFVESLALAHHTDEKSLGTLQQCCDAIDHLKRRIIKQKAASLNAEKT         | 1169        |
| GAR          | ESSLVDMFVFEALVIFVESLALAHSDKSLGTLQQCCSGAIDHLKRRIIKHKAATLN--KSS         | 1156        |
| LATIMERIA    | ESALVDKFVFEITLVVYVESLALAHMDEKSLGTVQQCCDAIDHLKRRIIEQKAPSLN--KAA        | 1157        |
| CAECIL       | ENALVDQFVFEILVVYLESALASHQDEKSLGTVQQCCDAIDHLKRRIIHKAPSLN--KTL          | 1158        |
| SNAKE        | ENALVDQFVFEALVVYLESALATHGDEKSLGTIQQCCDAIDHLKRRIIKHKASTLN--QKS         | 1157        |
| CANARY       | ENSLVEQFVFEALVVFLSALAHHTDEKSLGTAQQCCDAINHLKRRIIKHKAPSLN--KEG          | 1148        |
| OSTRICH      | ENSLVEQFVFEALVVFLSALATHADEKSLGTQQCCDTINHLKRRIIKHKAPSLN--RAG           | 1118        |
| GECKO        | ENALVDQFVFEALVLYLESALATHGDEKSLGTQQCCDAVDHLKRRIIKHKASTLN--KES          | 1157        |
| TURTLE       | ENSLVEQFVFEVLVVYLESALATHHTDEKSLGTVQQCCDAIDHLKRRIIKHKASSLN--KAE        | 1157        |
| ALLIGATOR    | ENSLVEQFAFEALVIFIESLALHTHTDEKSLGTQQCCDAIDHLKRRIIKHKAPSLN--KAE         | 1117        |
| PLATYPUS     | EDSLVDQFTFEALVIFLESALATHADEKSLGTIQQCCDAIDHLKRRIIEKKHISFN--EEK         | 1151        |
| TASDEVIL     | EEALVEQFVFEALVIYMESLALATHADEKSLGTIQQCCDAIDHLTRRIIEKKHITLN--KPK        | 1154        |
| <b>HUMAN</b> | <b>EESSLVEQFVFEALVIYMESLALAHADEKSLGTIQQCCDAIDHLKRRIIEKKHVSLN--KAK</b> | <b>1149</b> |
| MOUSE        | EGSLVEQFVFEALVTYMESLALAHHTDEKSLGTVQQCCDAIDHLKRRIIEKKHVSLN--KAK        | 1146        |

\* :\*\*\*: \* \*\* \* : :\*\*\*\*\*:\* \*:\*:\* \*\* .. :\*\*\* \*\* \* : \* :\*

FOREHEAD

Supplementary Figure 1. DNA-PKcs, jawed vertebrates

|              |                                                                        |             |
|--------------|------------------------------------------------------------------------|-------------|
| DANIO        | KR <b>RIPRGF</b> PADQ-SVCLSNVVLWLLTQCGRPQTECRHKSMELFFEFVPLLPGNSSPAMWL  | 1222        |
| MILII        | KG <b>RVPRGF</b> PPDQ-PVSLKEVVMWLLTQCGRPQTECRHKCMVLFYELVPLLPGNKTPSCWL  | 1212        |
| BAMBOO       | KR <b>RVPRGF</b> PADQ-MVCLTDVVMWLLTQCGRPQTECRHKCMELFYEFVPLLPGARTASLWL  | 1214        |
| XENOPUS      | KR <b>RIPRGF</b> PQGN-TVCLFDIVLWLLQCGRPQTECRHKAMQLFFEFVPLLPGNKPLTAWL   | 1230        |
| STERLET      | RR <b>RVPRGF</b> PPDK-PVCLLDVIMWLLVQCGRPQTECRHKCMELFYEFVPLLPDNKSPASWL  | 1228        |
| GAR          | RR <b>RVPRGF</b> PPDK-PVSLTDVVMWLLVQCGRPQTECRHKCMELFYEFVPLLPGGKNPAVWL  | 1215        |
| LATIMERIA    | TR <b>RVPRGF</b> SPDK-VFCLSDVVMWLLVQCGRPQTACGHKAMELFYEFVPLLPGKKSPAAWL  | 1216        |
| CAECIL       | KR <b>RLPRGF</b> PSTKSSFCLSDLVWLLGQCGRPQTECRHKATDLFCFKFIPLLPGNKSPSSWL  | 1218        |
| SNAKE        | TR <b>RLPRGF</b> PS-R-SICLEDIVMWLLRQCGQPQTECRHKVMELEFFEFVPLLPGNPSPSSWL | 1215        |
| CANARY       | KR <b>RVPRGF</b> PPTK-SVCLLEDIVMWLLVQCGRPQTECRHKAMELFYEFVPLLPGNKSPSSWL | 1207        |
| OSTRICH      | ER <b>RVPRGF</b> PATK-TVCLLDIVMWLLVQCGRPQTECRHKSMELFYEFVPLLPGNKSPSSWL  | 1177        |
| GECKO        | QR <b>RLPRGF</b> PAPAK-SICLEDIVMWLFQCGRPQTECRHKAMELFFEFIPLLPGSKSPSLWL  | 1216        |
| TURTLE       | KR <b>RIPRGF</b> PNAK-SVCLLDIVMWLLVQCGRPQTECRHKSMELFYEFVPLLPGNQSPSLWL  | 1216        |
| ALLIGATOR    | KR <b>RLPRGF</b> QPAE-SLCLLDIVMWLMMQCGRPQTECRHKSMELFYEFVPLLPGNKSPSSWL  | 1176        |
| PLATYPUS     | NR <b>RLPRGF</b> PNAR-SVRLLDIVWLLGQCGRPQTECRHKSIELFYKQVPLLPGNKSPASWL   | 1210        |
| TASDEVIL     | KR <b>RLPRGF</b> PPVQ-TLCLLDIVWLLAQCGRPQTECRHKSIELFYKQVPLLPGNRSPSCWL   | 1213        |
| <b>HUMAN</b> | <b>KRRLPRGFPPSA-SLCLLDLVKLLAHACGRPQTECRHKSIELFYKQVPLLPGNRSPNLWL</b>    | <b>1208</b> |
| MOUSE        | KR <b>RLPQGF</b> PPLT-SLCLLDLVEWLLAHACGRPQTECRHKSMELFYKQVPLLPGNKSPSLWL | 1205        |

\*::\*\* . \* :: \*\* : \*\* : \* \* \* : \* : ::\*\*:\* \*\*

FOREHEAD

|              |                                                                                                                                                                        |             |
|--------------|------------------------------------------------------------------------------------------------------------------------------------------------------------------------|-------------|
| DANIO        | DEQLKQ <b>R</b> GP <b>GFL</b> IS <b>C</b> LEGGG-----LLSQPTLREIEAPFSIRGTLQWMDLLLAALDC                                                                                   | 1274        |
| MILII        | ADV <b>LKER</b> GV <b>SFL</b> IG <b>KF</b> ESAGSDHAKCSGIYQPTLKD <b>LQ</b> EPFSVRAALQWMDMLLAALDC                                                                        | 1272        |
| BAMBOO       | EE <b>ILKRN</b> GV <b>SFL</b> V <b>NK</b> FEGAGSDHDNCSGI <b>ICH</b> PTL <b>QAL</b> KEPFSVRAALQWMDMLLAALDC                                                              | 1274        |
| XENOPUS      | DD <b>QVEKE</b> G <b>II</b> FLIN <b>RF</b> EGAGHS <b>DGMHTG</b> IFNIPALHDLHEPFSMHAVLQWMDMLLAALDC                                                                       | 1290        |
| STERLET      | DD <b>ILKQ</b> GV <b>AFL</b> IS <b>RF</b> ESAGREDGGCSG <b>IL</b> SQPTLHDL <b>Q</b> EPFSLRAVLQWMDMLLAALDC                                                               | 1288        |
| GAR          | ED <b>ILKDE</b> GE <b>GFL</b> IR <b>RF</b> EGAGRC <b>DGDSSGL</b> LSQATL <b>RDLQ</b> GSFSVRAALQWMDLLLAALDC                                                              | 1275        |
| LATIMERIA    | DEV <b>LKKQ</b> GV <b>SFL</b> I <b>QK</b> FE <b>GGG</b> NTD <b>DR</b> LSG <b>IL</b> SQPTL <b>CDLQ</b> EPFSLRAV <b>QW</b> MDMLLAALDC                                    | 1276        |
| CAECIL       | ND <b>H</b> LKEEG <b>ISF</b> I <b>S</b> RFEGGGSDGDHQ <b>SGL</b> IAQPTL <b>CDL</b> KEPFSLRAV <b>QW</b> MD <b>FLA</b> ALDC                                               | 1278        |
| SNAKE        | GD <b>V</b> L <b>QKE</b> GI <b>YFL</b> I <b>KK</b> FE <b>GGG</b> CEGENVSG <b>IL</b> SHPTL <b>YELQ</b> GSFS <b>LQAV</b> QWMDMLLAALDC                                    | 1275        |
| CANARY       | AD <b>T</b> L <b>KKRT</b> VT <b>FL</b> IN <b>K</b> FE <b>GGG</b> TDAKSPSG <b>IL</b> SQPTL <b>HGMQ</b> EPFS <b>LQAV</b> QWMD <b>FLA</b> ALDC                            | 1267        |
| OSTRICH      | ADV <b>LKEK</b> GCS <b>FL</b> IN <b>K</b> FE <b>GGG</b> RDADSPSG <b>IF</b> SRPTL <b>HGIQ</b> EPFSLRT <b>VMQ</b> WMD <b>FLA</b> ALDC                                    | 1237        |
| GECKO        | DD <b>ILRKQ</b> E <b>ISFL</b> I <b>KK</b> FE <b>GGG</b> DEGKSVSG <b>IL</b> SHPTL <b>SGLQ</b> DNFSLRAV <b>QW</b> MDMLLAALDC                                             | 1276        |
| TURTLE       | GD <b>L</b> L <b>KKQ</b> G <b>ISFL</b> IN <b>K</b> FE <b>GGG</b> NDGDNLSG <b>IL</b> SQPTL <b>CDM</b> QEPFSLRAV <b>QW</b> MD <b>FLA</b> ALDC                            | 1276        |
| ALLIGATOR    | GD <b>V</b> L <b>KKQ</b> D <b>SSFL</b> IN <b>K</b> FE <b>GGG</b> NQDDNLSG <b>IL</b> SYPTL <b>HHLQ</b> EPF <b>SVRAV</b> QWMDMLLAALDC                                    | 1236        |
| PLATYPUS     | ND <b>ILKEE</b> GV <b>SFL</b> IS <b>RF</b> EGAGTGDNDHLSG <b>IL</b> VWPTL <b>LDLE</b> GFSLRAV <b>QW</b> MDMLLASLE <b>C</b>                                              | 1270        |
| TASDEVIL     | TD <b>ILKKE</b> DIS <b>FL</b> IN <b>RF</b> EGAG <b>NASE</b> HLSG <b>IL</b> AQPTL <b>FDLQ</b> GF <b>TLRAV</b> QWMDMLLAAL <b>E</b> C                                     | 1273        |
| <b>HUMAN</b> | <b>KDVLKEE</b> GV <b>SFL</b> IN <b>TF</b> EGGC <b>--GQ</b> PSG <b>IL</b> AQPTL <b>LYLR</b> GP <b>FSLQAT</b> LC <b>WLDLLAAL</b> E <b>C</b>                              | <b>1266</b> |
| MOUSE        | KD <b>L</b> I <b>KKK</b> G <b>ISFL</b> IN <b>TF</b> EGG <b>ASS</b> SDQ <b>PAG</b> IL <b>AQ</b> PTL <b>VYLQ</b> GP <b>ISLR</b> GV <b>LQ</b> W <b>LDLLAAL</b> E <b>C</b> | 1265        |

: . . \*:: :\*... :: :\* .. :::: .. \*::\*\*:\*\*

FOREHEAD

Supplementary Figure 1. DNA-PKcs, jawed vertebrates

|              |                                                                                                               |             |
|--------------|---------------------------------------------------------------------------------------------------------------|-------------|
| DANIO        | <b>YNTFTNLRLQLQRILGTCE-KSSFLPAVHFFLTEL</b> SMQDIQAARACFRLGNAGQSHF <b>SP</b>                                   | 1333        |
| MILII        | <b>YNTFVRLAMVKPSELLGTSQ-ETGFMKAMNFFLKT</b> LARHDITAAEECF <b>TLGVKGVLFSP</b>                                   | 1330        |
| BAMBOO       | <b>YNTFIGLHLVKPSKIMGTSE-NSSFLKALNFFL</b> TNLARHDVTAAEES <b>FAYGIKGI-LFSP</b>                                  | 1332        |
| XENOPUS      | <b>YNTFIGMRFLKANTVLGKNAEKSSFLKA</b> AF <b>FFIT</b> SLSMENIKAAEQ <b>CMGSKS-S-VFSP</b>                          | 1347        |
| STERLET      | <b>YNTFIGLHLVKPHEVLGAKV-QSGFLK</b> AI <b>FFIT</b> ELAVQDISAAELCF <b>SVGPKGAL-FSP</b>                          | 1346        |
| GAR          | <b>YNTFIGLHFVKPQQILGTQE-KSSFLK</b> AI <b>FFIA</b> ELTMQDISAAE <b>RCFSSGSEGL-FSP</b>                           | 1333        |
| LATIMERIA    | <b>YNTFIELRMINPREIFGTTS-VSGFLRA</b> VE <b>FFL</b> TRLATQDITAAEQ <b>CF</b> TAGSKDTM <b>-FSP</b>                | 1334        |
| CAECIL       | <b>YNTFIWMRAIKPNEILSTTT-QSSFLRT</b> CE <b>FFL</b> QKLC <b>LHDITAAEQCFRTG</b> PSGNI <b>-ASP</b>                | 1336        |
| SNAKE        | <b>YNTFIEPGMIKPSEIFASNT-GSSFLK</b> SL <b>EFFL</b> GKIALY <b>NISGAEQCFSS</b> ASKGDM <b>LLSP</b>                | 1334        |
| CANARY       | <b>YNTFFELQMIKPDEV</b> LG <b>VNE-SSLFLKAVQFFL</b> DTIALHD <b>IAAEQCFD</b> SSSKGSM <b>-FSP</b>                 | 1325        |
| OSTRICH      | <b>YNTFFELRMIKPHEILGVNE-RSSFLK</b> AV <b>FFLE</b> TIALHD <b>IAAEQCFD</b> CGLKGS <b>V-FSP</b>                  | 1295        |
| GECKO        | <b>YNTFIEQGMIKPNEIVATNT-ESSFMT</b> S <b>VEFFL</b> EKLAL <b>KDVSGAEQCFNT</b> ASKGNI <b>-FSP</b>                | 1334        |
| TURTLE       | <b>YNTFIEQGMIKPNEILGTM-RSSFLRA</b> VE <b>FFLKT</b> IVLHD <b>ISAAE</b> RC <b>FD</b> TGSKGNM <b>-FSP</b>        | 1334        |
| ALLIGATOR    | <b>YNTFIEQRMFKPEN</b> VL <b>GTN---SSFLRA</b> VE <b>FFLE</b> TIALHD <b>IAAEQCFY</b> TKSKDN <b>V-FSP</b>        | 1292        |
| PLATYPUS     | <b>YNTFIEEKT</b> VKAHE <b>ILGTQA-KSSFLRA</b> IS <b>FFLE</b> RIA <b>FDITAAEQCF</b> TGSKGSM <b>-FSP</b>         | 1328        |
| TASDEVIL     | <b>YNTFIEERA</b> TKAQE <b>ILGTKA-KSSFLK</b> AV <b>FFLE</b> NIALHD <b>IRAAEKCF</b> GTIKGN <b>V-FSP</b>         | 1331        |
| <b>HUMAN</b> | <b>YNTFIGERT</b> V <b>GALQVLGTEA-QSLLK</b> AV <b>AFPLE</b> SIAM <b>HDIIAAEKCF</b> GTGAAG <b>NR-TSP</b>        | <b>1324</b> |
| MOUSE        | <b>YNTFIEKET</b> VQ <b>QEV</b> LGA <b>EV-QSLLK</b> SVA <b>FFLE</b> SIATH <b>SARAVEQ</b> RFSGGAP <b>GP--SL</b> | 1322        |

\*\*\*\* . :.. : :: : \*\*: : . ... :

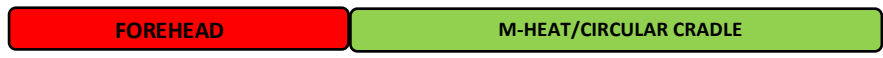

|              |                                                                                                                                                                                                                     |             |
|--------------|---------------------------------------------------------------------------------------------------------------------------------------------------------------------------------------------------------------------|-------------|
| DANIO        | <b>RETEQ</b> YNYS <b>KCSII</b> VR <b>LM</b> EF <b>STM</b> VLQKCPQDL <b>WKL</b> MEK <b>DVF</b> NS <b>SLFTLV</b> V <b>LAV</b> CEP <b>SSIG</b>                                                                         | 1393        |
| MILII        | <b>RE</b> EE <b>YN</b> Y <b>CKCTII</b> VR <b>IME</b> F <b>ACL</b> ILEGLQDC <b>W</b> K <b>VLE</b> KD <b>LLNS</b> DL <b>FEL</b> IA <b>MV</b> VID <b>P</b> TS <b>IG</b>                                                | 1390        |
| BAMBOO       | <b>RERED</b> YN <b>FN</b> K <b>CTII</b> VR <b>IME</b> F <b>VSM</b> VL <b>EDC</b> QDF <b>LK</b> M <b>LEK</b> Y <b>LLNST</b> LFELVAT <b>V</b> VID <b>P</b> PS <b>IG</b>                                               | 1392        |
| XENOPUS      | <b>HE</b> IE <b>AY</b> NYS <b>KCTII</b> VR <b>IME</b> F <b>ITM</b> F <b>IDIC</b> Q <b>QD</b> SL <b>KIL</b> ENS <b>VFN</b> EP <b>MWEL</b> IA <b>ITV</b> CD <b>P</b> SS <b>IG</b>                                     | 1407        |
| STERLET      | <b>KE</b> RED <b>YN</b> Y <b>SKGTII</b> VR <b>ME</b> F <b>VSM</b> VL <b>ENC</b> Q <b>PE</b> F <b>W</b> K <b>LLE</b> Q <b>NIL</b> N <b>P</b> TF <b>FEL</b> I <b>TTV</b> CD <b>P</b> SS <b>IG</b>                     | 1406        |
| GAR          | <b>RERED</b> YN <b>Y</b> CK <b>GTII</b> VR <b>LM</b> EF <b>V</b> TM <b>VL</b> DKCS <b>QDL</b> W <b>KV</b> L <b>ERD</b> IL <b>H</b> L <b>TFF</b> ELI <b>ATT</b> V <b>CE</b> P <b>SSIG</b>                            | 1393        |
| LATIMERIA    | <b>RERED</b> YS <b>Y</b> SK <b>CTII</b> VR <b>IL</b> TF <b>VSM</b> VL <b>E</b> K <b>CPDL</b> W <b>KV</b> L <b>EK</b> D <b>LLTP</b> ALLE <b>LTV</b> RT <b>VCE</b> P <b>ASIG</b>                                      | 1394        |
| CAECIL       | <b>QERED</b> YN <b>Y</b> SK <b>CTII</b> VR <b>IME</b> F <b>VSM</b> IL <b>ENC</b> Q <b>DFWR</b> L <b>L</b> E <b>KD</b> LL <b>NNN</b> L <b>VEL</b> TV <b>LTV</b> CD <b>P</b> SS <b>IG</b>                             | 1396        |
| SNAKE        | <b>HE</b> REE <b>YN</b> Y <b>SKCTII</b> VR <b>IM</b> V <b>F</b> GSM <b>ILE</b> TH <b>Q</b> H <b>VW</b> K <b>LLE</b> K <b>EL</b> LN <b>EN</b> L <b>IK</b> L <b>V</b> V <b>KTI</b> CD <b>P</b> ES <b>VIG</b>          | 1394        |
| CANARY       | <b>QERDK</b> YN <b>Y</b> SK <b>CTII</b> VR <b>ILE</b> F <b>V</b> TV <b>I</b> LE <b>MC</b> Q <b>DFW</b> K <b>LLE</b> K <b>EL</b> LN <b>AS</b> F <b>IEL</b> V <b>V</b> MT <b>VCD</b> P <b>SHVG</b>                    | 1385        |
| OSTRICH      | <b>QEREV</b> YN <b>Y</b> SK <b>CTII</b> VR <b>S</b> ME <b>F</b> VT <b>M</b> VL <b>ESC</b> Q <b>DFW</b> K <b>LLE</b> K <b>EL</b> LN <b>AS</b> F <b>IEL</b> L <b>V</b> MT <b>VCD</b> P <b>SHVG</b>                    | 1355        |
| GECKO        | <b>QEKED</b> YN <b>Y</b> SK <b>CTII</b> VR <b>IM</b> V <b>F</b> SM <b>ILE</b> TC <b>Q</b> DF <b>W</b> K <b>LLE</b> R <b>EL</b> LN <b>KN</b> L <b>IEL</b> TV <b>RTV</b> CD <b>P</b> KS <b>IG</b>                     | 1394        |
| TURTLE       | <b>QEREE</b> YN <b>Y</b> SK <b>CTII</b> VR <b>IM</b> A <b>F</b> V <b>SM</b> IL <b>ETC</b> Q <b>DFW</b> K <b>LLE</b> K <b>EL</b> LN <b>AN</b> L <b>IEL</b> L <b>V</b> RI <b>VCD</b> P <b>ANIG</b>                    | 1394        |
| ALLIGATOR    | <b>QEREE</b> YS <b>Y</b> SK <b>CTIV</b> VR <b>I</b> IR <b>F</b> V <b>SM</b> IL <b>ETC</b> Q <b>DFW</b> K <b>LLE</b> K <b>EL</b> LN <b>LN</b> L <b>IEL</b> L <b>V</b> VT <b>VCD</b> P <b>SAVG</b>                    | 1352        |
| PLATYPUS     | <b>QEREE</b> YN <b>Y</b> SK <b>CTII</b> VR <b>IME</b> F <b>AT</b> ML <b>L</b> N <b>TYQ-D</b> T <b>W</b> K <b>LLE</b> K <b>D</b> LL <b>NAT</b> F <b>MEL</b> V <b>VEI</b> V <b>CD</b> P <b>SSIG</b>                   | 1387        |
| TASDEVIL     | <b>QEREE</b> YN <b>Y</b> SK <b>CTIV</b> VR <b>IME</b> F <b>SS</b> ML <b>L</b> N <b>TCQ-D</b> V <b>W</b> K <b>LLE</b> K <b>D</b> LL <b>NAY</b> F <b>MEL</b> L <b>V</b> KT <b>LCD</b> P <b>SSIG</b>                   | 1390        |
| <b>HUMAN</b> | <b>QEGERY</b> YN <b>Y</b> SK <b>CTV</b> V <b>VR</b> IME <b>F</b> TT <b>LL</b> N <b>TSP-EGW</b> K <b>LL</b> K <b>D</b> L <b>CN</b> TH <b>LMR</b> V <b>L</b> Q <b>T</b> L <b>CE</b> P <b>ASIG</b>                     | <b>1383</b> |
| MOUSE        | <b>HEE</b> E <b>K</b> YN <b>Y</b> SK <b>CTV</b> L <b>VR</b> IME <b>F</b> TT <b>LL</b> L <b>IASP-ED</b> CK <b>LLE</b> K <b>D</b> L <b>CN</b> T <b>N</b> LM <b>Q</b> V <b>L</b> V <b>KM</b> I <b>CE</b> P <b>MSLG</b> | 1381        |

: \* : \* : \* : \* : \* : \* : \* : \* : \* : \* : \* : \* : \* : \* : \* : \* : \* : \* : \* : \*

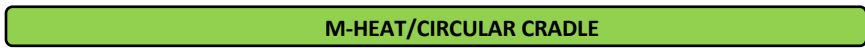



Supplementary Figure 1. DNA-PKcs, jawed vertebrates

|              |                                                                                                                                                                |             |
|--------------|----------------------------------------------------------------------------------------------------------------------------------------------------------------|-------------|
| DANIO        | <b>FN</b> MADLEVMTHL <b>PE</b> VCFPL <b>LK</b> ALASAPYRT <b>QL</b> ESCIRMRIT <b>KQ</b> SVEELCAIDLYETDTRN                                                       | 1453        |
| MILII        | <b>FN</b> MADVQVMKN <b>LP</b> NVCVK <b>LL</b> NAVMKSPFKET <b>LV</b> DSVRKRIT <b>QA</b> SIEALCNVDLYSPGART                                                       | 1450        |
| BAMBOO       | <b>FN</b> MADVQVM <b>KGL</b> PDICVRL <b>LM</b> KAA <b>LR</b> SPY <b>QES</b> LECS <b>MK</b> KRL <b>K</b> SQ <b>SIE</b> DL <b>CN</b> VDLYSQ---S                  | 1449        |
| XENOPUS      | <b>FN</b> TADVEVIN <b>LN</b> PNICIK <b>LM</b> KALGNTSYR <b>SS</b> LEVSL <b>KK</b> RVT <b>LQ</b> SIEELCSVDLYDPGARF                                              | 1467        |
| STERLET      | <b>FN</b> MADVEVMKN <b>LP</b> DICVRL <b>LK</b> ALAKSPY <b>KG</b> Q <b>LE</b> ISM <b>KR</b> RI <b>SY</b> K <b>SVE</b> ELCGVDLCNV <b>DARS</b>                    | 1466        |
| GAR          | <b>FN</b> MADMEVM <b>TN</b> LPEV <b>CV</b> H <b>IL</b> KALLKSPY <b>KT</b> Q <b>LE</b> Q <b>SIR</b> RR <b>VS</b> Q <b>Q</b> N <b>VE</b> Q <b>LCA</b> VDLYGSEARS | 1453        |
| LATIMERIA    | <b>FN</b> TADVQVMKN <b>LP</b> ICVRL <b>LK</b> ALMKSPY <b>KD</b> TL <b>EAS</b> IRKRIT <b>ARS</b> IKELCSVDLYNP <b>DARL</b>                                       | 1454        |
| CAECIL       | <b>FN</b> VADVQVMKN <b>LP</b> DVCIK <b>LL</b> KGLMKSPFK <b>ND</b> LE <b>FS</b> IKKRIT <b>SES</b> IKDLCDVDLYNQ <b>DARH</b>                                      | 1456        |
| SNAKE        | <b>FN</b> IADVQVM <b>EN</b> LPSICVRL <b>VK</b> ALMKTPY <b>NE</b> SL <b>ENS</b> IK <b>EI</b> IT <b>MK</b> SIEELCTVDLYNP <b>EARL</b>                             | 1454        |
| CANARY       | <b>FN</b> TADVQVM <b>KL</b> PDISVRL <b>MK</b> ALMKSPY <b>QES</b> L <b>KL</b> CLKERIT <b>PQ</b> SLE <b>DL</b> CSVDLFN <b>SEARL</b>                              | 1445        |
| OSTRICH      | <b>FN</b> TADVQVMKN <b>LP</b> DISVRL <b>MK</b> ALMKSPY <b>KES</b> L <b>KL</b> SLKERIT <b>PQ</b> SLE <b>DL</b> CSVDLFN <b>SDARF</b>                             | 1415        |
| GECKO        | <b>FN</b> TADVQVM <b>EK</b> LPDICVRL <b>IK</b> ALMRSPY <b>KES</b> L <b>V</b> T <b>SM</b> K <b>V</b> IT <b>PES</b> IE <b>EF</b> Y <b>G</b> VELYN <b>PDSRL</b>   | 1454        |
| TURTLE       | <b>FN</b> TADVQVMKN <b>LP</b> DVSVRL <b>LK</b> ALMKSPY <b>KES</b> L <b>EL</b> SLIKDRIT <b>SQ</b> SIEELCSVELYN <b>PDARF</b>                                     | 1454        |
| ALLIGATOR    | <b>FN</b> TADVQVMKN <b>LP</b> DNTVRL <b>MK</b> ALAKTPY <b>KES</b> L <b>EL</b> SLIKKRIT <b>SH</b> SIQ <b>EL</b> CSVDLYDP <b>DARF</b>                            | 1412        |
| PLATYPUS     | <b>FN</b> VADVQVM <b>SN</b> LPDVCV <b>VM</b> KAL <b>KK</b> SPY <b>KDA</b> LE <b>GN</b> IKR <b>VT</b> QA <b>SIE</b> ELCTVDLY <b>KPDARF</b>                      | 1447        |
| TASDEVIL     | <b>FN</b> IADVQVM <b>MN</b> LPNVCV <b>LL</b> KAL <b>KK</b> SPY <b>KES</b> L <b>E</b> INIKKRIT <b>PQ</b> SIE <b>VI</b> CAVNL <b>YNSDARF</b>                     | 1450        |
| <b>HUMAN</b> | <b>FN</b> IGDVQVM <b>AH</b> LPDVCV <b>NL</b> MKAL <b>KM</b> SPY <b>KD</b> IL <b>ETH</b> LREK <b>IT</b> QA <b>SIE</b> ELCAVNL <b>YGPDAQV</b>                    | <b>1443</b> |
| MOUSE        | <b>FN</b> IGDVQVM <b>NH</b> LPSICV <b>NL</b> LKAL <b>RK</b> SPY <b>RD</b> ML <b>ETH</b> LKEK <b>VT</b> VQ <b>SVE</b> ELCSINL <b>CSSGARQ</b>                    | 1441        |

**M-HEAT/CIRCULAR CRADLE**

|              |                                                                                                                                                                                                                                 |             |
|--------------|---------------------------------------------------------------------------------------------------------------------------------------------------------------------------------------------------------------------------------|-------------|
| DANIO        | SHAS <b>MN</b> LL <b>SACR</b> QLHQ <b>SGL</b> LN <b>SV</b> LHSQDAS <b>YG</b> CSL <b>GSK</b> LL <b>TS</b> VY <b>KSI</b> AP <b>GT</b> DRK <b>SL</b> PS <b>M</b>                                                                   | 1513        |
| MILII        | DHAG <b>LR</b> S <b>ILSAC</b> QQL <b>HK</b> AD <b>LL</b> NSAID <b>CE</b> AGSL <b>SS</b> SL <b>SLK</b> LL <b>SV</b> VY <b>KGI</b> AP <b>GD</b> ERK <b>SL</b> PS <b>I</b>                                                         | 1510        |
| BAMBOO       | DHAK <b>LN</b> S <b>ILLAC</b> KQL <b>HK</b> AG <b>LL</b> NSVL <b>KC</b> IG <b>SIV</b> P <b>PL</b> N <b>LK</b> LL <b>ST</b> VY <b>KGI</b> AP <b>GD</b> ERK <b>SL</b> PT <b>M</b>                                                 | 1509        |
| XENOPUS      | NRV <b>KL</b> GS <b>VLSAC</b> KQL <b>YK</b> A <b>EFF</b> NS <b>IV</b> PE <b>Q</b> VG <b>Q--</b> RF <b>GSK</b> LL <b>SV</b> VY <b>KGI</b> AP <b>TN</b> ERK <b>SL</b> PS <b>L</b>                                                 | 1525        |
| STERLET      | DRAR <b>L</b> V <b>VLSAC</b> KQL <b>HK</b> AG <b>LL</b> NSAL <b>QS</b> QA <b>AS</b> F <b>GL</b> SL <b>GSK</b> LL <b>SV</b> VY <b>KGI</b> AP <b>GD</b> ERK <b>SL</b> PS <b>M</b>                                                 | 1526        |
| GAR          | EHAR <b>LAL</b> V <b>L</b> S <b>ACK</b> QL <b>HR</b> AG <b>LL</b> NST <b>LQ</b> SQA <b>AS</b> F <b>GL</b> SL <b>GSK</b> LL <b>SV</b> VY <b>KGI</b> AP <b>GD</b> E <b>KK</b> SL <b>PSM</b>                                       | 1513        |
| LATIMERIA    | DHIR <b>L</b> GS <b>ILSAC</b> KQL <b>YD</b> AG <b>LL</b> NSAV <b>QY</b> Q <b>SG</b> DF <b>NL</b> Q <b>L</b> GS <b>TLL</b> SV <b>VY</b> K <b>GI</b> AP <b>GD</b> ERK <b>SL</b> PS <b>I</b>                                       | 1514        |
| CAECIL       | YHAR <b>IG</b> S <b>ILSAC</b> KQL <b>HK</b> AG <b>LL</b> NSVL <b>QS</b> Q <b>TAG</b> L <b>Q</b> FT <b>V</b> G <b>SK</b> LL <b>SV</b> VY <b>KGI</b> AP <b>GD</b> ERK <b>SL</b> PS <b>L</b>                                       | 1516        |
| SNAKE        | DHV <b>RY</b> IA <b>ILSAC</b> RQL <b>HK</b> AG <b>V</b> L <b>H</b> CIL <b>Q</b> SK <b>GAD</b> L <b>Q</b> F <b>ET</b> G <b>SK</b> LI <b>L</b> V <b>VY</b> K <b>GI</b> AP <b>GD</b> E <b>GR</b> S <b>SL</b> PS <b>L</b>           | 1514        |
| CANARY       | DQ <b>V</b> RF <b>GAV</b> L <b>SAC</b> KQL <b>Q</b> K <b>SGL</b> L <b>H</b> SVL <b>HG</b> Q <b>DE</b> GS <b>H</b> FS <b>V</b> G <b>SK</b> LL <b>SV</b> VY <b>KGI</b> AP <b>GG</b> E <b>R</b> M <b>S</b> L <b>PCL</b>            | 1505        |
| OSTRICH      | DQ <b>V</b> K <b>YSA</b> IL <b>SAC</b> KQL <b>Q</b> K <b>AG</b> LL <b>H</b> SVL <b>HN</b> Q <b>DE</b> V <b>PH</b> FS <b>L</b> G <b>CK</b> LL <b>SV</b> I <b>Y</b> K <b>GI</b> AP <b>GA</b> E <b>R</b> L <b>CL</b> PS <b>L</b>   | 1475        |
| GECKO        | DHV <b>RL</b> G <b>AIL</b> S <b>ACK</b> QL <b>HR</b> V <b>GL</b> L <b>H</b> CTL <b>Q</b> S <b>Q</b> GV <b>L</b> H <b>CE</b> AG <b>SK</b> LL <b>L</b> V <b>IY</b> K <b>GI</b> AP <b>GD</b> ERK <b>SL</b> PS <b>L</b>             | 1514        |
| TURTLE       | DHV <b>RL</b> SS <b>ILSAC</b> RQL <b>HK</b> AG <b>LL</b> H <b>ST</b> L <b>Q</b> S <b>Q</b> GS <b>L</b> H <b>FT</b> V <b>G</b> SK <b>LL</b> SV <b>VY</b> K <b>SI</b> AP <b>GD</b> ERK <b>SL</b> PS <b>L</b>                      | 1514        |
| ALLIGATOR    | DR <b>V</b> RISS <b>ILSAC</b> KQL <b>HK</b> AG <b>V</b> L <b>H</b> SVL <b>QS</b> Q <b>GS</b> L <b>H</b> FT <b>V</b> G <b>SQ</b> LL <b>SV</b> VY <b>KGI</b> AP <b>GD</b> ERK <b>CL</b> PS <b>L</b>                               | 1472        |
| PLATYPUS     | DR <b>P</b> RLAS <b>ILSAC</b> KQL <b>Q</b> R <b>AG</b> LL <b>HA</b> AV <b>HP</b> Q <b>ASH</b> L <b>Q</b> R <b>P</b> G <b>ST</b> K <b>LL</b> SV <b>VY</b> K <b>GI</b> AP <b>GD</b> ER <b>Q</b> S <b>SL</b> PS <b>L</b>           | 1507        |
| TASDEVIL     | DRAN <b>L</b> AS <b>LLSAC</b> KQL <b>HK</b> AG <b>LL</b> H <b>ST</b> V <b>ES</b> Q <b>AT</b> DL <b>PH</b> PI <b>GT</b> K <b>LL</b> SV <b>VY</b> K <b>GI</b> AP <b>GD</b> E <b>R</b> T <b>AL</b> PS <b>L</b>                     | 1510        |
| <b>HUMAN</b> | DR <b>S</b> RLAA <b>V</b> S <b>ACK</b> QL <b>HR</b> AG <b>LL</b> H <b>N</b> IL <b>PS</b> Q <b>ST</b> DL <b>H</b> HS <b>V</b> G <b>TE</b> LL <b>SL</b> VY <b>KGI</b> AP <b>GD</b> E <b>R</b> Q <b>CL</b> PS <b>L</b>             | <b>1503</b> |
| MOUSE        | ER <b>S</b> K <b>LL</b> S <b>ILSAC</b> KQL <b>HK</b> AG <b>F</b> SH <b>V</b> I <b>SP</b> S <b>Q</b> ST <b>AL</b> N <b>HS</b> SV <b>GM</b> RL <b>LL</b> SV <b>VY</b> K <b>GI</b> V <b>PA</b> E <b>ER</b> Q <b>CL</b> Q <b>SL</b> | 1501        |

**M-HEAT/CIRCULAR CRADLE**



Supplementary Figure 1. DNA-PKcs, jawed vertebrates

|           |                                 |                                  |      |
|-----------|---------------------------------|----------------------------------|------|
| DANIO     | DVGSRKLADRLVQLSFLGQDQSEQTVGLLLN | TITLSVPLSGSLNPHFLSFHGEYFYSLF     | 1573 |
| MILII     | DVSSKQLADGLLQLSFLGQCEELVSLLLN   | TMELSVPLSGATQKNFITFSHGGEYFYSLF   | 1570 |
| BAMBOO    | DVSSKMLADGLLQLSFLGQCEELVSLLLN   | TVELSVPLSGASQRHFISFSHGGEYFYSLF   | 1569 |
| XENOPUS   | DISSKRLAEGLELAFMFGGQCEELVSLLLN  | TVILSVPLPGTSQRNIINFSHGGEYFYTLF   | 1585 |
| STERLET   | DVSSRKLADGLLQLAFSLGGQCEELVDLLLN | SIMLSVPLSDTSQKNFITFSHGGEYFYSLF   | 1586 |
| GAR       | DVSSRRLADGLLQLAFSLGGQSEQLVSLLLN | TIMLSVPLSGTSDKNFISFSHGGEYFYSLF   | 1573 |
| LATIMERIA | DISSKRLADGLLQLAFSLGQSGELVCLLLN  | RVTLVPLSGTSGQRNFITFSHGGEYFYSLF   | 1574 |
| CAECIL    | DISSKRLADGLLQLAFDLGGQCEELVSLLLN | TVKLSVPLSGTSGQRNIISFSHGGEYFYSLF  | 1576 |
| SNAKE     | DIGSKRLAEGLLHLAFAGVRCTELVSLLLN  | TLMLFVPLSGAAQESLINFSHGGEYFYSLF   | 1574 |
| CANARY    | DLSRKRLADSLQLAFIDEQCEELVSLLLN   | TVVLSVPLSEASQNLNMFSGHGEYFYSLF    | 1565 |
| OSTRICH   | DISKRLADGLLQLAFIDGQCEELVSLLLN   | TVVLTVPPLGASRKNLVNFSHGGEYFYSLF   | 1535 |
| GECKO     | DMSSKRLAEGLLQLAFAGVQCKELVSLLLN  | SLMLSVPLSGVSRNLIISFSHGGEYFYSLF   | 1574 |
| TURTLE    | DISSKRLADGLLQLAFAGGQCEELVSLLLN  | TMMLSVPLSGTSGQRSLISFSHGGEYFYSLF  | 1574 |
| ALLIGATOR | DISSKRLADGLLQLAFAGGQSEELVSLMLN  | TAMLSVPLSEAAPRNLLSFSHGGEYFYSLF   | 1532 |
| PLATYPUS  | EISSKQLASGLELAFAGGLCEELVSLLLN   | TVVLSVPLAGTSGQRNLIISFSHGGEYFYSLF | 1567 |
| TASDEVIL  | EISSKRLASGLELAFAGGLCEELVNLLLN   | TVVLSVPLSGTCQKNLINFSHGGEYFYSLF   | 1570 |
| HUMAN     | DLCKQLASGLELAFAGGLCERLVSLLLN    | PAVLSTASLGSSQGSVIHFSHGGEYFYSLF   | 1563 |
| MOUSE     | DPCKSLANGLLELAFAGGLCDHLVSLLLN   | SAMLSVPLSGTSGQRNLIISFSHGGEYFYSLF | 1560 |

: . : \*\* . \* : \* \* : . . . \* \* : \* \* \* . \* . : \* \* \* \* \* . \* .

M-HEAT/CIRCULAR CRADLE

|           |                                  |                                 |      |
|-----------|----------------------------------|---------------------------------|------|
| DANIO     | QTSLNTELLRSVDRSVPLLLSSANQNPSMVS  | VLLNGMLDHSFRERSVRKSSQGSQLAEQVL  | 1633 |
| MILII     | SETINAELLKSLKSAVTQLMRSASENPKMVS  | TVLNGMLDQSFDRHTVRKKTQGVLLVSAVL  | 1630 |
| BAMBOO    | PETINSELLRNLSAVAQLMTSARENPKMVS   | AVLNGMLDHSFRDHTVRKKTQGIYLVSAVL  | 1629 |
| XENOPUS   | AETINTELLNNDTIVVELMKSLEDPKMVSC   | VLNGMLDQSFQRORTIRKQGVKLVNAVL    | 1645 |
| STERLET   | QETINSELLKNLDTTVAQLMKSAENPKMVS   | MVLNGMLDQSFRRERSVRKTSQGSQLVGGVL | 1646 |
| GAR       | QQTINIELLGSLDSTVPQLMSLAAENPKMVS  | AVLNGMLDQSFRRDRSVRESQGRQLVKRVT  | 1633 |
| LATIMERIA | METTINSELLRNLSAVSQLMNSAAENPKMV   | GAILNGLLDQSFRRNRTVRKQGSQLVDTVL  | 1634 |
| CAECIL    | SETINTELLKNLNTAILQLMKSSVDNPRMVG  | TILNGLDQCFRDRTVRKQGVKMLVIAVL    | 1636 |
| SNAKE     | LEIINRELLKNLEIAVLELMKSALDSPKMVS  | TVLNGMLDQSFKDRATCKQGVKLVAAIL    | 1634 |
| CANARY    | SETINQQLKNLDVFIIVRLMKSISINPQMVGS | ILNGLDQSFDRDRAVRKQGAKLVTAVL     | 1625 |
| OSTRICH   | SETINEQLLKNLDVILQLMESVSINPQMVGS  | ILNGLDQSFRRERTIRKQGVKLVTAVL     | 1595 |
| GECKO     | SDTINRELLKNLDVAVLHLLKSSLDSPKMVG  | TILNGLDQSFDRDRAVHKQGVKLVNAIL    | 1634 |
| TURTLE    | SETINQELLKDLDAVILQLMKSSVDSPKMVG  | TILNGLDQSFRRERAVRQGIKLVTAVL     | 1634 |
| ALLIGATOR | SETINHELLKNLDVAILQLMKSAVDNPRMVG  | TILNGLDQSFRRERTVRKQGMKLVTAVL    | 1592 |
| PLATYPUS  | SATINTELLKNLDTAVLELMKSSVDNAKMG   | TILNGLDQSFRRDRIVRQGEKLVDAIL     | 1627 |
| TASDEVIL  | SEVINTELLKNLDTAILELMKSSVDNAKMG   | GAILNGLDQSFRRDRAVRKQGMKLVATIL   | 1630 |
| HUMAN     | SETINTELLKNLDLAVLELMQSSVDNPKMVS  | AVLNGMLDQSFRRERANQKHQGLKLATTIL  | 1623 |
| MOUSE     | SEVINSELLKNLDIAVSRLMESSSDNPKMVS  | TVLNGMLDTSFRDRAVQKHQGLKLATAIL   | 1620 |

\* : \* \* . : . : \* : : . . \* \* . : \* \* \* \* \* . \* : : : : \* \* . : .

M-HEAT/CIRCULAR CRADLE

Supplementary Figure 1. DNA-PKcs, jawed vertebrates

|              |                                                                                         |             |
|--------------|-----------------------------------------------------------------------------------------|-------------|
| DANIO        | KGWDLRLPWWDGPAAATPESKTSVLSLLAKVLQIDSSVCSNTSHPAFNAVFTTFTALLTDV                           | 1693        |
| MILII        | TNWRRLLESWSENS-SAESKMAVLTLLSKVLQIDSSVSFSSNHEAFAMVFHTYTTILTDS                            | 1689        |
| BAMBOO       | SNWAKLDSWWSVKS-SPESKMAVLTLLSKVLQIDSSVSFGNSHDAFSMVFQTYTTILTDS                            | 1688        |
| XENOPUS      | ENWRRLDSWYKDS-PEESKMAVLTLLAKVLQIDSSVCFDINHSAFAEVEFKYTSILTDQ                             | 1704        |
| STERLET      | GSWTSLSQSWASSS-SAESKMAALTTLLSKVLQIDSSVSFNTHLAFAVVFSTYTTLVTDQ                            | 1705        |
| GAR          | QAWSSLSGWWSSPASTSESKMATLTLLSKVLQIDSSVCFNVNHEAFEAVFTTYTALITDS                            | 1693        |
| LATIMERIA    | QNWTKLSSWIRSS-SPESKMAALTTLLSKVLQIDSSVSFNPNHAAFPAVFNTYTTLLTDQ                            | 1693        |
| CAECIL       | QNWKKLDSWWDKNS-APESKMAVLTLLAKVLQIDSSVSSNAHHEAFSAVFNTYTSILTDQ                            | 1695        |
| SNAKE        | KNWGHLDHWAKDA-SPESKMSVLTLLAKVLQIDSSVSFT-HEAFPNVFNTYTCLLMDQ                              | 1692        |
| CANARY       | RNWEKLDGWAKGS-SAESKMAALTTLLAKVLQIDSSVSFNTNHEAFVAVFNTYTSLLTDQ                            | 1684        |
| OSTRICH      | RNWKRLDSWAKGS-APESKMAVLTLLAKVLQIDSAVSFNTNHEAFVAVFNTYTSLLIDQ                             | 1654        |
| GECKO        | KNWVHLDNWRTRDS-APESKMAVLTLLAKVLQIDSSVSFSTQHEAFSDVFNTYTSLLTDQ                            | 1693        |
| TURTLE       | RNWMRLDSWAKDS-APESKMAVLTLLAKVLQIDSSVSFNTNHEAFSAVFNTYTSLLIDR                             | 1693        |
| ALLIGATOR    | RNWMRLDTWAKDS-APESKMAVLTLLAKVLQVDSSVSFNTKHEAFFAVFNTYTSLLVDQ                             | 1651        |
| PLATYPUS     | QNWKRLDTWVAEDS-TPESKIAVLTLLAKVLQIDSSVSNNTNHAAFSAVFNTYTSLLIDK                            | 1686        |
| TASDEVIL     | QNWKKLDTWAKDS-VPESKMAVLTLLAKILQIDSSVSFSINHGAFLDVFNTYTSLLDDP                             | 1689        |
| <b>HUMAN</b> | <b>QHKKKCDSSWAKDS-PLETRMAVLTLLAKILQIDSSVSFNTHSGSFPEVFTTYISLLADT</b>                     | <b>1682</b> |
| MOUSE        | QNWKRCDSWVAPDS-APESKTTVLSLLAKMLQIDSALSFDTNHSSFSEIFTTYASLLADT                            | 1679        |
|              | * * : * : * : * : * : * : * : * : * : * : * : * : * : * : * : * : * : * : * : * : * : * |             |

**M-HEAT/CIRCULAR CRADLE**

|              |                                                                                         |             |
|--------------|-----------------------------------------------------------------------------------------|-------------|
| DANIO        | SMPLNLKSQALIMLPFFFTALPSPMLEELRRALSIVATHFPMQSEDEFPRGSLQCNNYMDC                           | 1753        |
| MILII        | TLALNLKSQAMIILPFFFAHLPEENLAVLRHALDQFVAHFPMKSEDEFPGKTLKYNNYVDA                           | 1749        |
| BAMBOO       | TLALNLKTKAVIILPFFFTQLPEENLVTLKNALNHFIASHFPMKSEDEFPGKTLRYNNYVDC                          | 1748        |
| XENOPUS      | KLGLNLKSQAIILPFFFTKLTGKELTELKNTLDQFVASNFPKSEDEFPGKTLKFNNYVDC                            | 1764        |
| STERLET      | TLPLNLKSQALIILPFFFTNLGSLADLHNALEVLVASHFPMQSEDEFPGKTLRYNNYIDS                            | 1765        |
| GAR          | ALPLNLKNHGLIILPFFFTNLPESTLAELQRALEMLVASHFPISSDEFPGKTLRYNNYVDT                           | 1753        |
| LATIMERIA    | TLALNLKSQAVIVLPFFFTNLPESTLADLKNALDQLVAFNFPKSEDEFPGKTLKYNNYVDC                           | 1753        |
| CAECIL       | KLGLNLKSQAIILPFFFTNLTGDSLNDLKNALDQLVAFNFPKSEDEFPGKTLKYNNYVDC                            | 1755        |
| SNAKE        | KLGLHLKSQAIILPFFFTNLVGEGLHKLKHALDQLVAYNFPKSEDEFPGKTLKYNNYVDC                            | 1752        |
| CANARY       | NLGLNLKGQAVIILPFFFTNLGKELNLDLKNALDQLVAFNFPKSEDEFPGKTLKHNNYVDC                           | 1744        |
| OSTRICH      | NLDNLKSQAMIILPFFFTNLGKELNLDLKNALDQLIAFNFPKSEDEFPGKTLKHNNYVDC                            | 1714        |
| GECKO        | NLGLNLKSQAVIILPFFFTNLVGERLVDLKNVLDQFVAFNFPKSEDEFPGKTLRYNNYVDC                           | 1753        |
| TURTLE       | NLGLNLKSQAVIILPFFFTNLGDRISELKNALDQLVAFNFPKSEDEFPGKTLRYNNYVDC                            | 1753        |
| ALLIGATOR    | NLGLNLKSQAVVILPFFFTNLGKELNLDLKNALDQLVAFNFPKSEDEFPGKTLRYNNYVDC                           | 1711        |
| PLATYPUS     | KLGLNLKSQAVLILPFFFTNLGDRILELKNALDQLVAFNFPKSEDEFPGKTLRYNNYVDC                            | 1746        |
| TASDEVIL     | KLGLNLKGQALIILPFFFTNLGKELNLDLKNALDQLVAFNFPKSEDEFPGKTLRYNNYVDC                           | 1749        |
| <b>HUMAN</b> | <b>KLDLHLKGQAVTLLPFFFTSLTGGSLLEELRRVLEQLIVAHFPMQSEDEFPPGTPRFNNYVDC</b>                  | <b>1742</b> |
| MOUSE        | KLGLHLKGQAVIILPFFFTSLREGSLENLKHILEKLIVCNFPKSEDEFPPDSLKYNNYVDC                           | 1739        |
|              | : * : * : * : * : * : * : * : * : * : * : * : * : * : * : * : * : * : * : * : * : * : * |             |

**M-HEAT/CIRCULAR CRADLE**

Supplementary Figure 1. DNA-PKcs, jawed vertebrates

|              |                                                                       |             |
|--------------|-----------------------------------------------------------------------|-------------|
| DANIO        | IRKFLEALQLSQSPLLLKLMARVLCRDKKHIMEELFQACFQKIAHQSYLGKQVLLLSSTY          | 1813        |
| MILII        | IKKLLDALELSQSPMLLKLMIAILCRDSRHVMEEGFQVCFQRLAKTGSCEKQVALLEAVY          | 1809        |
| BAMBOO       | VKKLLDALELSQSPMLLQILTEVLCRDNRHVMEAEFQICFQNIAKRGTCCEKQVALLEAY          | 1808        |
| XENOPUS      | IKKFLLDALELSQSPMLLQLMTEILCRDNRFHMEELFQSSFKKVIKRSSCDTQVILLNTLH         | 1824        |
| STERLET      | IKKFLLDALELSQSPMLLKLMTEGILCRDNKHVMEELFQTCFKRIARRGSCEKQVSLLDTVY        | 1825        |
| GAR          | IKKFLLDALELSQNPMLLKLMAEILCRDKKHVTEELFQACFKRIARRSGCERQVVLETVY          | 1813        |
| LATIMERIA    | IKKFLLDALELSQSPMLLRLMTEILCRDSKHCEELFLRCFKKIVRRGSCDRQVTLLEDTVY         | 1813        |
| CAECIL       | VKKFLDALELSQSTMLLKLMTTEILCRDTHFMEELFLTSFKRIARRGNCDKQVALLETVH          | 1815        |
| SNAKE        | VKKFLDALELSQNSTLLELMTEILCRDNKHIMEELFEINLKRIAKRGSCERQVLLLDTVH          | 1812        |
| CANARY       | TKKFLLDALELSQSPMLLQLMTEILCRDNRFHMEEDLFQASFKRISRRSPDKQVLLLDTVH         | 1804        |
| OSTRICH      | TKKFLLDALELSQSPMLLQLMTEVLCRDHRHFMEGLFQASFKRISRRSNSDRQVLLDVT           | 1774        |
| GECKO        | TKKFLLDALELSQSPMLLQLMTEILCRDHRHIMEEQFEISFIRIARRGSCYKQVLLDVT           | 1813        |
| TURTLE       | TKKFLLDALELSQSPMLLQLMTEILCRDHRHFMEEDLFQTSFKRISRRSSYEKQVLLDVT          | 1813        |
| ALLIGATOR    | TKKFLLDALELSQSPMLLQLMTEILCRDHRHMEEDLFQTSFKRVIKRSDCNKQVLLDVT           | 1771        |
| PLATYPUS     | TKKFLLDALELSQSPMLLQLMTEILCRDQRHFMEELFQMSFKRIARRSGSAKQVALLEAVY         | 1806        |
| TASDEVIL     | TKKFLLDALELSQSPMLLQFMTEILCRDQRHVIIEELFQTTFQRISKRSSATQVALLDVT          | 1809        |
| <b>HUMAN</b> | <b>MKKFLDALELSQSPMLLELMTEVLCREQQHVMEEELFQSSFRRRIARRGSCVTQVGLLESVY</b> | <b>1802</b> |
| MOUSE        | MKKFLDALELSQSPMLFQLMTEILCREQRHIMEELFQTTFKRIARQSPCVTQLNLLSVY           | 1799        |

M-HEAT/CIRCULAR CRADLE

|              |                                                                   |             |
|--------------|-------------------------------------------------------------------|-------------|
| DANIO        | QSFOAKEVPSNFMLMGLIDRVLLPLASHCSPOALSQFFISNIADIMTTLQTRFTKSVESV      | 1873        |
| MILII        | GMFENEGGLSNARQSVMDRSLTLITHCSLDALKEFISKIKDAMGILQSRFTKTSSESS        | 1869        |
| BAMBOO       | EMFRNEEMLPNATRQAFAMDRSLTLIGHCSPDALREFFCKIVKDAMEILQSRFTKTNESS      | 1868        |
| XENOPUS      | NMFKSESMLNGTLQSLIDRCLLTLWNCSLDAMISFFTNIISLAMDTLKSFRFTKVPAA        | 1884        |
| STERLET      | QMFQNDDELHNTARQAVLDRSLTLTLHCSSDALKEFFCTTVGDMGTLQARFTKSSEST        | 1885        |
| GAR          | EMFQAGELASGAMRQAVLDRVLLTLVLHCSSDALRGFFCKTIASVMETLQARFTKLNEM       | 1873        |
| LATIMERIA    | KMFQDEGLLSNTRQAIMDRFTLIMLNCSDALKEFLCKNILDVMGTLQARFTKSNESA         | 1873        |
| CAECIL       | DMFKTENLWSNTRQTIIVDKSLLILWHCSDALKEFFCKI IHTMDTLKGRFTKSNELA        | 1875        |
| SNAKE        | QMFQSETLHNSNITRQAYVDRCLLILLHCSLDALKEFLSKIIIEAMDTLKSFRFTKSNETS     | 1872        |
| CANARY       | KMFQSEELLSNAARQAFVDRSLLTLWHCSDALRVFFGKIIIEAMDTLNSFRFTKSHHT        | 1864        |
| OSTRICH      | KMFQSEDLRSNVTRQAFVDRSLLTLLHCSLDALREFFGTIIVQAMDTLNSFRFTKSNEST      | 1834        |
| GECKO        | KMFQSETLLSATRQAYVDRSLLTLLHCSLDALDDFFCKIIVEAMDSLTSFRFTKSNETM       | 1873        |
| TURTLE       | KMFQSEALLSNATRQAFVDRSLLTLLHCSLDALKDFFSKIVLEAMDTLKTFRFTKSNESA      | 1873        |
| ALLIGATOR    | KMFQSESLLSNVTRQAFVDRSLLTLLHCSLDALKEFFSKIVVEAMDTLKSFRFTKSNETV      | 1831        |
| PLATYPUS     | GMFLRDDHLSSTTRQAFVDRSLLTLLHCSLDALKEFFYRIIVGAMDMLKSFRFTKSNEST      | 1866        |
| TASDEVIL     | RMFQKDD-LSNIPRLACVDRCLLTLWHCSDALREFFSIIIVEALDVLSFRFTKLSSEST       | 1868        |
| <b>HUMAN</b> | <b>EMFRKDDPRLSFTRQSFVDRSLLTLWHCSDALREFFSTIVVDAIDVLSFRFTKLNEST</b> | <b>1862</b> |
| MOUSE        | TMFRKADLPNSVTRQAFVDRSLLTLWHCSDALKEFFSRIVVDAIDVLSFRFTKLNFT         | 1859        |

M-HEAT/CIRCULAR CRADLE

NUC194

Supplementary Figure 1. DNA-PKcs, jawed vertebrates

|              |                                                                      |             |
|--------------|----------------------------------------------------------------------|-------------|
| DANIO        | FESQIMMKIGCCKLLLEVLYSRLPKKEEVYSKNSAINQAFCGTGC-AEGNEL-SKNLLKSCF       | 1931        |
| MILII        | FDNQLTRKIGCYKLEEVYIRLPKDDIYSEDSKINRAFHSASN-MEGNKLLSKSLLKLCY          | 1928        |
| BAMBOO       | FDNQLTKKIGCYKLFVEMYRLPKNDVYTDGSKIQAFAHSAAGN-IEGNKL-SKTLLKSCY         | 1926        |
| XENOPUS      | FDSQITKKMGYYKMLEVQYSRLSKDEIYST---VNNAYHVSSK-PEGNEL-TKALIKLCY         | 1939        |
| STERLET      | FETQLTKKNGCYKLEEVLYSRLPKEDVYSKESLINQAFCRPNK-AEGNEL-SKSLLKSCF         | 1943        |
| GAR          | FEGQLIKKNGCYKLEEVLYSRLPKKEEVYSKESKINQGF CGPSRAAEGNEL-SKTLLKSCF       | 1932        |
| LATIMERIA    | FDTQVTTKTGTCYKLLVEMCSRLPKDDIYSEQSRINQAFHGSCS-AQRNGL-SKTLLKLCY        | 1931        |
| CAECIL       | FDAQIMMKMSYYKMLEVMYSRLTKEDIYSKGRINQAFHGSSN-AEGNEL-TKILVKSCY          | 1933        |
| SNAKE        | FETQLIKKISYYKILEVMYSRLSKEDVHSKDSRINQVFQRSTH-VEGNEL-TKLLIKSCY         | 1930        |
| CANARY       | FDTQVTKKMGYYKLEVMYVRLSKEDVYSKDSKINQAYRGSMS-VEGNEL-TKTLLIKSCY         | 1922        |
| OSTRICH      | FDTQVTTKTGYYKVLEVMYVRLSKEDVYSKDSKINQAYCGSIS-VEGNEL-TKTLLIKSCY        | 1892        |
| GECKO        | FDTQLTKKMSYYKILEVMYSRLSKEDVYSKDSRINQAFLRSTC-VEGNEL-TKTLLIKSCY        | 1931        |
| TURTLE       | FDTQVTKKMGYYKILEVMYSRLSKEDIYSKDSRINQAYQGSTN-VEGNEL-TKTLLIKSCY        | 1931        |
| ALLIGATOR    | FNTQVIKMGYYKILEVLYSRVSKEDVHSKDSQINQAYQGTN-VEGNEL-TKMLIKSCY           | 1889        |
| PLATYPUS     | FDTQVTTKLGYKMLEMMYSRLPKDDVHSKESRINRAFHGSSV-IEGNEL-TKTLLIKSCY         | 1924        |
| TASDEVIL     | FDTQVTTKLGYKMLEVLYSRLPKDDVHSKESRINQVPHGSSI-VEGNEL-TKTLLIKLCY         | 1926        |
| <b>HUMAN</b> | <b>FDTQITTKMGYYKILDVMYSRLPKDDVHAKESKINQVPHGSCI-TEGNEL-TKTLLIKLCY</b> | <b>1920</b> |
| MOUSE        | FDTQITTKMCYYKMLAVMYSRLPKDDVHSKEAKINQAFHGSRV-AEGNEL-TKTLLKLCY         | 1917        |

\*: \*: \*    \*: :    \*: \*:::    : . :    : \* \* \* \* \* \*

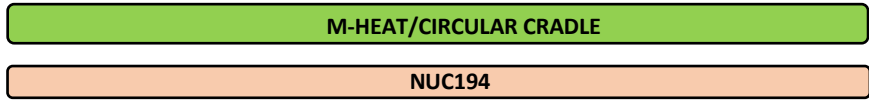

|              |                                                                       |             |
|--------------|-----------------------------------------------------------------------|-------------|
| DANIO        | EAFTEENMTGEMVLLLELRRQFHCAAYNCAIALISCSFNETKQFYQGFLFTEKPKNQFIFDN        | 1991        |
| MILII        | DAFTEENMTGEKQLEKRRQYHCAAYNCIMAVVTCIFTEAKFYQGFLFSEKAEKNIFIFEN          | 1988        |
| BAMBOO       | DTVTEENMTGETQLEKRRQYHCAAYNCMIAILCCIFTEAKFYQGFLFSEKPEKNIFILEN          | 1986        |
| XENOPUS      | DTFTEENMCGETQLEKRRQYHCAAYNCAISLISCVFSELKQFYQGFLFTEKKEKNLLIFEN         | 1999        |
| STERLET      | DTFTEENMAGETQLEKRRQYHCAAYNCAITVISCFSFNETKQFYQGFLFSEKPEKNQFIFEN        | 2003        |
| GAR          | EAYTENMAGETQLEERRQYHCAAYNCAIAVISCFSFNETKQFYQGFLFTEKPEKNQFIFEN         | 1992        |
| LATIMERIA    | DEFTEENMAGETQLEKRRQYHCAAYNCAIAVISCIFTESKFYQGFLFSEKPEKSLYILEN          | 1991        |
| CAECIL       | DSFSEENMAGETQLFEKRRQYHCAAYNCAIAVISRAFTDAKFYQGFLFTEKTEKNLLIFEN         | 1993        |
| SNAKE        | DAFTEENMAGETQLEENRRQYHCAAYNCAIAVISCVFNENKFYHGFLFTEKPKNLLIFEN          | 1990        |
| CANARY       | DAFTEENMAGESQLEKRRQYHCAAYNCAIAVISCVFTESKFYQGFLFSEKSEKNLLIFEN          | 1982        |
| OSTRICH      | DAFTEENMAGESQLEKRRQYHCAAYNCAIAVISCVFTESKFYQGFLFTEKTEKNLLIFEN          | 1952        |
| GECKO        | DAFTEENMAGETQLEKRRQYHCAAYNCAIAVISCVFNESKFYQGFLFTEKPKNLLIFEN           | 1991        |
| TURTLE       | DAFTEENMAGESQLEKRRQYHCAAYNCAIAVISCVFTESKFYQGFLFTEKPEKNLFIFEN          | 1991        |
| ALLIGATOR    | DAFTEENMAGESHLLGKRREYHCAAYNCAIAVISCVFTESKFYQGFLFTEKPEKNLLIFEN         | 1949        |
| PLATYPUS     | DAFTEENMAGETQLEKRRQYHCAAYNCAIAVISCVFNETKQFYQGFLFTEKPEKNLFIFEN         | 1984        |
| TASDEVIL     | DAFTEENMAGETQLEKRRLYHCAAYNCAIAILCRVFSSEMKFYQGFLFTEKPEKNLFIFEN         | 1986        |
| <b>HUMAN</b> | <b>DAFTEENMAGENQLLEERRLYHCAAYNCAISVICCVFNELKQFYQGFLFSEKPEKNLLIFEN</b> | <b>1980</b> |
| MOUSE        | DAFTEENMAGESQLEKRRLYHCAAYNCAISLISCVFNELKQFYQGFLFNEKPEKNLFIFEN         | 1977        |

: : \* \* \* \* \* \* \* : \* \* : \* \* \* \* \* \* \* : : : \* : \* \* \* \* \* \* \* \* \* \* \* \* \* \* \* \*

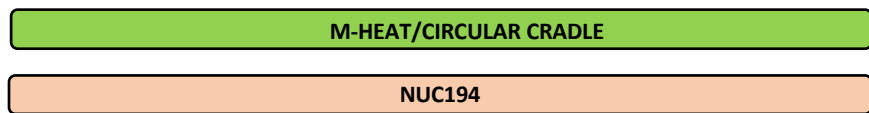

Supplementary Figure 1. DNA-PKcs, jawed vertebrates

|              |                                                                                                                                     |             |
|--------------|-------------------------------------------------------------------------------------------------------------------------------------|-------------|
| DANIO        | LIDSQRVY <b>NFP</b> IEIDVPIERK <b>KKY</b> VMIRKEVSG---ENGDA <b>PVY</b> LSQS <b>SYMAD</b> SS <b>LSSEEM</b>                           | 2048        |
| MILII        | LIEAHRTY <b>NFP</b> VEIEVPLEK <b>RRF</b> ISIRKEAREAGDGS <b>EPQ</b> YLSSQS <b>SYMAD</b> SS <b>LSSEEM</b>                             | 2048        |
| BAMBOO       | LIDSQRAY <b>NFP</b> VEIEV <b>PVEK</b> RRYFAIRKEARESAEGDS <b>DEPH</b> YLSQS <b>SYMV</b> SS <b>LSSEEM</b>                             | 2046        |
| XENOPUS      | LIDLQRNY <b>TFP</b> VEIEV <b>PMER</b> KKYFAIRKEARDAS <b>TESDEP</b> SYLSSQS <b>SYMAD</b> SS <b>LSSEEM</b>                            | 2059        |
| STERLET      | LIDAKHTY <b>SFP</b> VEIEVPLER <b>KKY</b> VAIRKEARQGGEGDS <b>DEPH</b> YLSQS <b>SYMAD</b> SS <b>LSSEEM</b>                            | 2063        |
| GAR          | IIDAQQT <b>YRFP</b> VEIEVALER <b>KAKY</b> VAIRKEAREAGDRDA <b>EEPH</b> YLSQS <b>SYMAD</b> SS <b>LSSEEM</b>                           | 2052        |
| LATIMERIA    | LIDMKCSY <b>NFP</b> IEIEVPIEK <b>KKRY</b> VAIRKEARGSTIGDL <b>DEPQ</b> YMSQS <b>SYMAD</b> SS <b>LSSEEM</b>                           | 2051        |
| CAECIL       | LIDLQRCT <b>YTFP</b> VEIEVPLER <b>KKY</b> VAIRQEARNTANGES <b>DAPH</b> YLSQS <b>SYMAD</b> SS <b>LSREEM</b>                           | 2053        |
| SNAKE        | LLDLQHRY <b>SFP</b> IEIEVPLEK <b>KKRY</b> ITIRKEARQ <b>TM</b> SGDS <b>AEPR</b> YLAS <b>ASYM</b> VSS <b>LSSEEM</b>                   | 2050        |
| CANARY       | LIDLKREY <b>TFP</b> VEIEVPLER <b>KKRY</b> IAIRKEARDAGN <b>SSQDEP</b> KYLASS <b>SYM</b> DSS <b>LSSEEM</b>                            | 2042        |
| OSTRICH      | LIDLKRQY <b>SFP</b> VEIEVPLER <b>KKRY</b> IAIRKEARD <b>SG</b> NGNE <b>DEPK</b> YLP <b>SASYM</b> DSS <b>LSSEEM</b>                   | 2012        |
| GECKO        | LLDLQHRY <b>SFP</b> IEIEVPLER <b>KKRY</b> IAIRK <b>DARE</b> AMSVDS <b>AEPH</b> YLAS <b>ASYM</b> ADSS <b>LSSEEM</b>                  | 2051        |
| TURTLE       | LLDLKHRY <b>SFP</b> VEIEV <b>PMER</b> KKRYITIRKEARD <b>AV</b> NRDS <b>DEPQ</b> YLP <b>SASYM</b> VSS <b>LSSEEM</b>                   | 2051        |
| ALLIGATOR    | LIDLKHQY <b>SFP</b> VEIEV <b>PMER</b> KKRYIAIRKEARD <b>TV</b> NGGP <b>DEPQ</b> YLP <b>SASYM</b> VSS <b>LSSEEM</b>                   | 2009        |
| PLATYPUS     | LIDLKRCY <b>TFP</b> VEIEV <b>PMER</b> KKRYIAIRKEARD <b>SV</b> NDNS <b>DEPH</b> YLS <b>SLSSM</b> ADSS <b>LSSEI</b>                   | 2044        |
| TASDEVIL     | LIDLKHCT <b>YTFP</b> VEIEV <b>PMER</b> KKRYIAIRKEARD <b>AANG</b> DSE <b>GP</b> HYLS <b>SLSYM</b> ADSS <b>LSSEEM</b>                 | 2046        |
| <b>HUMAN</b> | <b>LIDLKRRY<b>NFP</b>VEIEV<b>PMER</b>KKRY<b>IE</b>IRKEARE<b>AANG</b>DS<b>DG</b>PS<b>YMS</b>SL<b>SYLAD</b>ST<b>LSSEEM</b></b>        | <b>2040</b> |
| MOUSE        | LIDLKRCY <b>TFP</b> VEIEV <b>PMER</b> KKRY <b>IE</b> IRKEARD <b>AANG</b> AS <b>GS</b> PH <b>YMS</b> SL <b>SYL</b> TSS <b>LSSEEM</b> | 2037        |

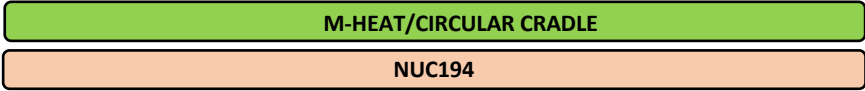

|              |                                                                                                                                                                                 |             |
|--------------|---------------------------------------------------------------------------------------------------------------------------------------------------------------------------------|-------------|
| DANIO        | <b>SQ</b> FD <b>FST</b> GV <b>QSF</b> SY <b>NS</b> DPSPG <b>VSS</b> SS <b>SR</b> MR <b>E</b> -RKEVLSQ <b>DE</b> T <b>VE</b> LEMDEL <b>NQ</b> HEC <b>MAN</b> MTA                 | 2107        |
| MILII        | <b>SQ</b> FD <b>FST</b> GV <b>QSF</b> SY <b>NS</b> DP <b>RG</b> HAVRS <b>RR</b> KEQ <b>AEL</b> SVVQ <b>S</b> D <b>IME</b> LEMDEL <b>NQ</b> HEC <b>MP</b> AMIA                   | 2108        |
| BAMBOO       | <b>SQ</b> FD <b>FST</b> GV <b>QSF</b> SY <b>SS</b> DPKVSVL <b>TR</b> KT <b>E</b> WTES <b>NIM</b> LND <b>DIVE</b> LEMDEL <b>NQ</b> HEC <b>MA</b> TMTA                            | 2106        |
| XENOPUS      | <b>SQ</b> FD <b>FST</b> GV <b>QSF</b> SY <b>SS</b> SK <b>ML</b> SQ <b>SAS</b> RR <b>KE</b> Q <b>ITE</b> GK <b>TF</b> DD <b>VME</b> FEMDEL <b>NQ</b> HEC <b>MA</b> AMTG          | 2119        |
| STERLET      | <b>SQ</b> FD <b>FST</b> GV <b>QSF</b> SY <b>SS</b> DP <b>SARA</b> ARG <b>RR</b> E-RVESL <b>VQ</b> DD <b>VVE</b> LEMDEL <b>NQ</b> HEC <b>MA</b> SMTA                             | 2122        |
| GAR          | <b>SQ</b> FD <b>FST</b> GV <b>QSF</b> SY <b>GS</b> DP <b>STR</b> PMPS <b>RR</b> RD-GAE <b>AAL</b> QDD <b>VVV</b> LEMDEL <b>NQ</b> HEC <b>MA</b> SM <b>TV</b>                    | 2111        |
| LATIMERIA    | <b>SQ</b> FD <b>FST</b> GV <b>QSF</b> SY <b>SS</b> NR <b>AA</b> AVVH <b>S</b> RR <b>KE</b> -R <b>TES</b> SVVQDD <b>VME</b> FEMDEL <b>NQ</b> HEC <b>MA</b> AMTA                  | 2110        |
| CAECIL       | <b>SQ</b> FD <b>FST</b> GV <b>QSF</b> SY <b>SS</b> DP <b>TAA</b> Q <b>FHS</b> RR <b>KE</b> -H <b>PE</b> FT <b>VQ</b> ED <b>VME</b> FEMDEL <b>NQ</b> HEC <b>MA</b> AMTG          | 2112        |
| SNAKE        | <b>SQ</b> FD <b>FST</b> GI <b>QSF</b> RS <b>SED</b> PT <b>SS</b> GSHIR <b>KE</b> -I <b>TD</b> T <b>VV</b> PG <b>DM</b> MELEMDEL <b>NQ</b> HEC <b>MT</b> SM <b>TT</b>            | 2109        |
| CANARY       | <b>SQ</b> FD <b>FST</b> GV <b>QGF</b> SY <b>SS</b> DP <b>TAS</b> STR <b>FR</b> KE-P <b>TE</b> Y <b>KV</b> LN <b>DE</b> MELEMDEF <b>NQ</b> HEC <b>MA</b> SM <b>TS</b>            | 2101        |
| OSTRICH      | <b>SQ</b> FD <b>FST</b> GV <b>QGF</b> SY <b>SS</b> DP <b>TAS</b> SP <b>FR</b> KE-P <b>TE</b> Y <b>MA</b> LDD <b>DTE</b> LEMDEL <b>NQ</b> HEC <b>MA</b> SM <b>TT</b>             | 2071        |
| GECKO        | <b>SQ</b> FD <b>FST</b> GV <b>QSF</b> SY <b>NS</b> DP <b>TAS</b> ASH <b>FR</b> KE-P <b>TE</b> SM <b>GL</b> DI <b>ME</b> LEMDEL <b>NQ</b> HEC <b>MA</b> SM <b>TT</b>             | 2110        |
| TURTLE       | <b>SQ</b> FD <b>FST</b> GV <b>QSF</b> SY <b>NS</b> DP <b>TAS</b> SI <b>H</b> FR <b>KE</b> -P <b>TE</b> SM <b>DP</b> DD <b>LME</b> LEMDEL <b>NQ</b> HEC <b>MA</b> SM <b>TT</b>   | 2110        |
| ALLIGATOR    | <b>SQ</b> FD <b>FST</b> GV <b>QSF</b> SY <b>NT</b> DP <b>TAT</b> SAR <b>FR</b> KE-S <b>TE</b> SM <b>VL</b> DD <b>EME</b> LEMDEL <b>NQ</b> HEC <b>MA</b> SM <b>TT</b>            | 2068        |
| PLATYPUS     | <b>SQ</b> FD <b>FST</b> GV <b>QSY</b> SY <b>SS</b> DP <b>VK</b> STGY <b>H</b> FR <b>KE</b> -Y <b>RD</b> P <b>V</b> TQ <b>S</b> D <b>VLE</b> LEMDEL <b>NQ</b> HEC <b>MA</b> TMTA | 2103        |
| TASDEVIL     | <b>SQ</b> FD <b>FST</b> GV <b>QSY</b> SY <b>ST</b> DP <b>SK</b> AT <b>VV</b> H <b>FR</b> RE-R <b>IDS</b> M <b>VQ</b> DD <b>VME</b> LEMDEL <b>NQ</b> HEC <b>MT</b> TMTA          | 2105        |
| <b>HUMAN</b> | <b>SQ</b> FD <b>FST</b> GV <b>QSY</b> SY <b>SS</b> DP <b>PR</b> PAT <b>GR</b> FR <b>RE</b> -Q <b>RD</b> P <b>T</b> V <b>H</b> DD <b>VLE</b> LEMDEL <b>NR</b> HEC <b>MA</b> PLTA | <b>2099</b> |
| MOUSE        | <b>SQ</b> FD <b>FST</b> GV <b>QSY</b> SY <b>SS</b> DP <b>RK</b> PT <b>TGH</b> FR <b>RE</b> -H <b>Q</b> DS <b>M</b> TQ <b>DD</b> IMELEMDEL <b>NQ</b> HEC <b>MA</b> PMIA          | 2096        |

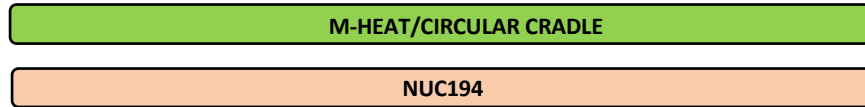

S2056



Supplementary Figure 1. DNA-PKcs, jawed vertebrates

|              |                                                                       |             |
|--------------|-----------------------------------------------------------------------|-------------|
| DANIO        | <b>LLRHMQRNNITPKVEEGVVRPSDLPPWMKFLQGKLDNPSTPLNIRLFIAKLIINTEEIFRP</b>  | 2167        |
| MILII        | <b>LINHMQRNNITPKVEEGKTPQELPPWMKFLHGKLGNSSIPLNIRLFIAKLIVNSEEVFRP</b>   | 2168        |
| BAMBOO       | <b>LIKHMQKTNITPKVEEGKTPHELPPWMKFLHGKLGNSATPLNIRLFIKLIIVNTEEIFQP</b>   | 2166        |
| XENOPUS      | <b>LIKHMNRSEITPKVDEEDASPQELPSWMKFLHVKLGNTSTPLNIRLFIKLIIVNTEEVFRP</b>  | 2179        |
| STERLET      | <b>LLNHMQRNNITPKVDEGTVPADLPPWMKFLHGKFGNASTHLNFKLFIKLIINTEEVFRP</b>    | 2182        |
| GAR          | <b>LINHMQRNNITPEVEEGTVPSDLPPWMKFLQGKLGNPSTQLNIRLFIKLIIVNKEEVFRP</b>   | 2171        |
| LATIMERIA    | <b>LINHMQRNKITPKVEEESGPVELPPWMKFLSHKLANPATPLNIRLFIKLIIVNTEEVFRP</b>   | 2170        |
| CAECIL       | <b>LIKYMQKTQITPKVEEGTVPQDLPPWMKFLHGKLGNTSTPLNIRLFIKLIANTEDVFRP</b>    | 2172        |
| SNAKE        | <b>LLKHMHRNNITPVVEKDTNSPELPPWMKFLHNKLGNTSTVPLNIRLFIKLIIVNTEEVFQP</b>  | 2169        |
| CANARY       | <b>LIKHMERNQITPKVEEGTVPADLPLWMKFLHGKLGNPSPVPLNIRLFIKLIIVNTEEVFRP</b>  | 2161        |
| OSTRICH      | <b>LIKHMQRNQITPKVEDGTVPVDLPLWMKFLHGKLGNPSPVPLNIRLFIKLIANTEDVFRP</b>   | 2131        |
| GECKO        | <b>LIKHMHRNNITPTVEKGAVLPDLPPWMKFLHSHKLGNPSPVPLNIRLFIKLIIVNTEEVFQP</b> | 2170        |
| TURTLE       | <b>LIKHMQRNQITPKVDEGIVPRDLPPWMKFLHGKLGNPSPMLNIRLFIKLIIVNTEEVFRP</b>   | 2170        |
| ALLIGATOR    | <b>LIKHMQRNQITPKVDEGAVSVALPPWMKFLHSHKLGNPSPVPLNIRLFIKLIIVNTEEVFRP</b> | 2128        |
| PLATYPUS     | <b>LIKHMQRNQITPKVEEGSGSTNLPWMKFLHGKLANPLGALNIRLFIKLIANTEDVFRP</b>     | 2163        |
| TASDEVIL     | <b>LIKHMQRNHITPHVKEGSEPPSLPPWMKFLHNKLENPSTPLNIRLFIKLIINTEEVFRP</b>    | 2165        |
| <b>HUMAN</b> | <b>LVKHMHRSLGPPQGEEDSVPRDLPSWMKFLHGKLGNPVPLNIRLFIKLIIVNTEEVFRP</b>    | <b>2159</b> |
| MOUSE        | <b>LIKHMQRNVIAPKGEEGSIKDLPPWMKFLHDKLGNASVSLNICLFIKLIIVNTEEVFRP</b>    | 2156        |

\*.:\*:\*... \* .. \*\* \*\*\*\*: \*: \* \*\*\* \*\*:\*:\*: \*.:\*:\*:

M-HEAT/CIRCULAR CRADLE

NUC194

|              |                                                                       |             |
|--------------|-----------------------------------------------------------------------|-------------|
| DANIO        | <b>YAKHWLGPMLQLVVSSSNGGEGIHFMVVDIVVTVLSWASVASPKGNTRDEVLVNRLLEGFL</b>  | 2227        |
| MILII        | <b>YAKEWLGPLLQLVVSNGNGDGIHYMVVEIVVTVLSWTSVATPKGNMKDEILANRLLLEFL</b>   | 2228        |
| BAMBOO       | <b>YAKEWLGPLLQLVVSNGNGDGIHYMVVEIVVTVLSWISVATPKGDLKNEILANRLLLEFL</b>   | 2226        |
| XENOPUS      | <b>YARFWIGPILQLIVSGNNGGTGIHYMVVELVVTILSWSSIATPNGQAKEEILANRLLLEFL</b>  | 2239        |
| STERLET      | <b>YARHWLGPMLQLVVSNGNGGEGIHFMVVEIVVTVLSWTSLASPKGNTRDEILANRLLLEFL</b>  | 2242        |
| GAR          | <b>YAKHWLWPLLQLVVSNGNGGEGIHFMVVEIVVTVLSWASVATPKGDTKDEVLANRLLLEFL</b>  | 2231        |
| LATIMERIA    | <b>YAKHWLGPFLQLVVSNGNGGEGIHFMVVDIVVTVLSWANIAAPKGNTRDEILANRLLLEFL</b>  | 2230        |
| CAECIL       | <b>YAKQWLGPLLQLVVSNGNGDGIHYMVVEIVVTVLSWANVATPAGLAKDEILANRLLLEFL</b>   | 2232        |
| SNAKE        | <b>YAKWWLGPLLQLVVSNGNGGEGIHFMVVEIVVTLLSWTNVATPKGNIKDEVLANRLLLEFL</b>  | 2229        |
| CANARY       | <b>YAKHWLGPMLQLVVSNGNGGEGIHFMVVEIVVTILSWTSVATPKGNIKDEILANRLLLEFL</b>  | 2221        |
| OSTRICH      | <b>YAKQWLGPLLQLVVSNGNGGEGIHFMVVEIVVTLLSWTSVATPKGNIKDEILANRLLLEFL</b>  | 2191        |
| GECKO        | <b>YAKQFLGPLLQLIVSGDNGGEGIHFMVVEIVVTLLSWTSIATPKENIKDEILANRLLLEFL</b>  | 2230        |
| TURTLE       | <b>YARQWLGPLLQLVVSRDNGGEGIHFMVVEIVVTLLSWTSVAAPKGNIKDEILANRLLLEFL</b>  | 2230        |
| ALLIGATOR    | <b>YARHWLGPMLQLVVS RDNGGEGIHFMVVEIVVTLLSWTSVASPKGNVKDEILANRLLLEFL</b> | 2188        |
| PLATYPUS     | <b>YARHWLGPMLQLVVSNGNGGEGIHFMVVEIVATVLSWTSIATPTGVTKDELLANRLLLEFL</b>  | 2223        |
| TASDEVIL     | <b>YAKHWLNPMLQLVVS ENNGGEGIHFMVVEIVVVVLSWTSIATPKGVPKDELLANRLLQFL</b>  | 2225        |
| <b>HUMAN</b> | <b>YAKHWLSPLLQLAASENNGGEGIHFMVVEIVATILSWTGLATPTGVPKDEVLANRLLNLF</b>   | <b>2219</b> |
| MOUSE        | <b>YAKHWLSPLLQLAVCEN-NREGIHFMVVEIVATILSWTGLATPTGVPKDEVLANRLLRFL</b>   | 2215        |

\*\*: :: \*:\*:\* .. . \*:\*:\*:\*: :\*:\*:\* \*:\*:\* :\*:\*:\*.\*\*\* \*

M-HEAT/CIRCULAR CRADLE

NUC194



Supplementary Figure 1. DNA-PKcs, jawed vertebrates

|              |                                                                       |             |
|--------------|-----------------------------------------------------------------------|-------------|
| DANIO        | FKNCFHSKRAVFRHNLEIIRTVEECWKDCLTIPYDLIYERFAGTDPNSKDNSVGIQLLGI          | 2287        |
| MILII        | MKNSFHEKTAVFRHNLEIIKTVVEECWKDCLSVPYSLIFSRFSTDPNSKDNSVGIQLLGI          | 2288        |
| BAMBOO       | MKNCFHEKRVVFRHNLEIIKTVVEECWKDCLSIPIYSLIFDRFAGRDPNTKDNSVGIQLLGI        | 2286        |
| XENOPUS      | MKNVFHEKRAVFRHNLEIIKTVLECWKECLSIPIYRLIYEGFSGTDPNTKDNSVGIQLLGL         | 2299        |
| STERLET      | MKNAFYDKRAVFRHNLEIIKTVIECWKDCCLAVPYSLIFDRFSGKDPNSKNNSVGIQLLGI         | 2302        |
| GAR          | MRNAFHEKRAVFRHNLEIIKTVVEECWKDSLMPYSLIFDRFAGSDPNSKDNSVGIQLLGI          | 2291        |
| LATIMERIA    | MKNTYHEKRAVFRHNLEIIKTVVEECWKDCCLAVPYSLLYQRFSGKDPNTKDNTVGIQLLGI        | 2290        |
| CAECIL       | VTHSFHEKRAVFRHNLEIIKTVVEECWKDCLSIPIYRLIFERFSNGTNSKDNSVGIQLLGL         | 2292        |
| SNAKE        | MKNVVFHQKRAVFRHNLEIIKTVIECWKDCCLSIPIYRIIFQLFS-GDPNTKDNSVGIQLLGI       | 2288        |
| CANARY       | MKNAFHPKRAVFRHNLEIIKTVIECWKDCCLSIPIYSLIFQRFSSGDPDTKDNSVGIQLLGI        | 2281        |
| OSTRICH      | MKNAFHPKRAVFRHNLEIIKTVIECWKDCCLSIPIYSLIFEKFSGGDPNTKDNSVGIQLLGI        | 2251        |
| GECKO        | MKNAFHQKRAVFRHNLEIIKTVVEECWKDCCLSIPIYRIIFERFSGGDPNTKDNSVGIQLLGI       | 2290        |
| TURTLE       | MKNVVFHQKRAVFRHNLEIIKTVVEECWKDCCLSIPIYRLIFEQFSGGDPNTKDNSVGIQLLGI      | 2290        |
| ALLIGATOR    | MKNTFHQKRAVFRHNLEIIKTVVEECWKDCLTVPIYRLIFEQFSGGDPDTKDNSVGIQLLGI        | 2248        |
| PLATYPUS     | MKHVFHQKRAVFRHNLEIIKTVVEECWKDCCLSIPIYRLIFEKFAFGDPNTKDNSVGIQLLGI       | 2283        |
| TASDEVIL     | MKHVFHPKRAVFRHNLEIIKTVVEECWKDCCLSIPIYRIIFEKFSNRDPNSKDNSVGIQLLGI       | 2285        |
| <b>HUMAN</b> | <b>MKHVFHPKRAVFRHNLEIIKTVLECWKDCCLSIPIYRLIFEKFSGKDPNSKDNSVGIQLLGI</b> | <b>2279</b> |
| MOUSE        | MKHVFHPKRAVFRHNLEIIKTVLECWKECLSIPIYRLIFEKFSHKDPNSKDNSVGIQLLGI         | 2275        |
|              | . : : * . *****:*:****:* ** :. : * : : :*:*****:                      |             |

M-HEAT/CIRCULAR CRADLE

|              |                                                                    |             |
|--------------|--------------------------------------------------------------------|-------------|
| DANIO        | VMANNLPPYDAACGIEHdryfQSLANNSLFIryKEVYSAAAeVIGLILNyMTERENQIEG       | 2347        |
| MILII        | VLANNLSPYVPKCEIGYERfQRLVYNIslTRYKEVYAAAeVLGLVLHYFAENEKQVDG         | 2348        |
| BAMBOO       | VLANNLPPYDCKCEIDSERFFQRLVHNIslTRYKEVYAAAeVLGLVLQYLAG--KPMDC        | 2344        |
| XENOPUS      | ALANNFSLDPKCGIDPERYfQSLANNLGLTRfKEVYIAAAeVIGLVLRYIVQNEKRTEA        | 2359        |
| STERLET      | VLANNLPPYDPKCGIDSESfYQALATNIsfGRfKDIYAAAeVIGLIMQYLAKNEKQLEG        | 2362        |
| GAR          | VLANNLPPYDPSCGIEHERYfKSLANNIsfVRYKDIHVAaAeVIGLVMQYMAEKEKQSEG       | 2351        |
| LATIMERIA    | ILANNLPHDPTCSIDMESVVKALANNSLFIryKEVYAAAeVLGLVLQYRAEKEKELGG         | 2350        |
| CAECIL       | ILANNLPPYDPKCGIDVERfYQALANNIALTKYKDIYLAaAeVLGLALHYVAEKEKTLEG       | 2352        |
| SNAKE        | VLANNLPPYDPKCEIDSIrYfQALSNNIALIRYKEVYVAaAeVLGLILQYIAEKENTFEG       | 2348        |
| CANARY       | VLANNLPPYDPKCEIDRVRfYQALTSNMGLLKYREVYAAAeVLGLALQYIAERENILED        | 2341        |
| OSTRICH      | VLANDLPPYDPKCEIDRVRfYQALISNMGLLKYKEVYAAAeVLGLALRYVAERENILED        | 2311        |
| GECKO        | VLANNLPPYDPKCEIDNVRfYQALANNMALVRYKEVYAAAeVLGLVLQYIAEKENIYES        | 2350        |
| TURTLE       | VLANNLSPYDPKCEIDSVrYfQDLANNMSLIRYKEVYAAAeVLGLILQYMAEKENIFEG        | 2350        |
| ALLIGATOR    | VLANNLPPYDPKCEIDSTRfYQALVNNMALLKYKEVYAAAeVLGLTLRYIAEKENITEG        | 2308        |
| PLATYPUS     | VLANNLPPYDPKCGIDSARfYQALANNSLlVRYKEVYAAAeVLGLTLQYVSEKETMLED        | 2343        |
| TASDEVIL     | IMANNLPPYDSKSGIESTrYfQALVNNMSfIKYKEVYAAAeVLGLILQYIAKKNVLED         | 2345        |
| <b>HUMAN</b> | <b>VMANDLPPYDPQCGIQSSEfYQALVNNMSfVRYKEVYAAAeVLGLILRYVMERKNILEE</b> | <b>2339</b> |
| MOUSE        | VIANNLPPYDPNCDITSAMfYfEALVNNMSfVRYKEVYAAAeVLGLILQYITERKHVIAE       | 2335        |
|              | :*:* * . * :. : * *:. : :*:*****:* .*                              |             |

M-HEAT/CIRCULAR CRADLE



Supplementary Figure 1. DNA-PKcs, jawed vertebrates

|           |                                                                |      |
|-----------|----------------------------------------------------------------|------|
| DANIO     | VTAFASHPSVPCREMYDILMWIQDNYSDSESRDSTSVSVARETLLOGLTDENYGL        | 2526 |
| MILII     | VIAFISHPSVPCREMYDILMWIYDNYRDAESQSDPDSKAVFVTTKDTLLQGLTDDNPAL    | 2527 |
| BAMBOO    | VVAFISHPSPICREMYDILMWIYDNYRDPESQSDPDSKEIYETSDALLQGLTDENPAL     | 2522 |
| XENOPUS   | VTAFSSHSFPVCREMYDIFMWIYDNYRDHESQNSKSVFVFNMAKEGLLOGLVDENTEL     | 2538 |
| STERLET   | VTAFTHPSVPCREMYDILMWIHDNYRDPESQSDSVSTEVFNLAKEVLLQGLTDENQGL     | 2540 |
| GAR       | VTSFVTHPSVPCREMYDILMWIHDNYRDESESDSDSLEMLNVAKEVLLQGLVDENQGL     | 2529 |
| LATIMERIA | VTGFISHPSTVPCREMYEILMWIHDNYRQESQANNESREVLKLAASEVLLQGLTDENPGL   | 2528 |
| CAECIL    | VVTFSSHPSPMCREMYDILMWIYDNYRDPESQANDDSQEVFSRANDVLLQGLIDENAGL    | 2530 |
| SNAKE     | VTGFISHPSPLCRGQMYDVLMWIYDNYSDSESQADEESSQLLKVAKESLLQGLIDENSGL   | 2526 |
| CANARY    | VTGFISHPSVMCRQRMIDILMWIYDNYSDPESQADDDREILKVAKEVLLQGLIDENAEL    | 2519 |
| OSTRICH   | VTGFISHPTVICRQRMIDILMWIYDNYSDPESQADGDSQEVFLKLAKEILLQGLTDENAEL  | 2489 |
| GECKO     | VTGFITHPSPLCRGRMYDILMWIYDNYRDPESQADEKSSSEVFKLAKEVLLQGLIDENSGL  | 2528 |
| TURTLE    | VTGFISHPSVPCREMYDILMWIYDNYRDPESQAEESQEVFKLAKEMLLQGLMDENSGL     | 2528 |
| ALLIGATOR | VTGFISHPSVPCREMYDILMWIYDNYRNSSESQADEDSQEVFKVAKEMLLQGLTDEISEL   | 2486 |
| PLATYPUS  | VVEFISHPSVPCREMYNILMWIHDNYRDPESQADEESREVFKLAKEILLQGLVDENHGL    | 2521 |
| TASDEVIL  | VVEFISHPSVPCREKMYNILMWIHDNYRDLSESQTDEVSQEVFLKLAKEVLLQGLMDDNLGL | 2523 |
| HUMAN     | VVEFVSHPSPTCREQMYNILMWIHDNYRDPESQETDNDSQEIFKLAQVLIQGLIDENPGL   | 2517 |
| MOUSE     | VVEFVSHPSPTCREQMYNILMWIHDNYRDPESQONDEDSQEIFKLAQVLIQGLIDENVGL   | 2513 |

\* \* : \* \*\* : \* : \* \* \* \* \* \* : \* \* : \* : : \* : \* \* \* \* \* \*

**M-HEAT/CIRCULAR CRADLE**

|           |                                                               |      |
|-----------|---------------------------------------------------------------|------|
| DANIO     | QLYVRNFWSHESRLPETLERMLVVLSKSLYSRIEEQFLSLATDLLLLLEMTSHSPDFTRNM | 2586 |
| MILII     | QLYVRNFWGHENRLPTGTHDRMLAILRSMYSNKIETQYLSIATNLLLEMTSRSPDYTRE   | 2587 |
| BAMBOO    | QLYVRNFWSHENRLPTGTLDRMLASLGSLYCNKIETQYLSIATNVLLEMTSHSPDYSRE   | 2582 |
| XENOPUS   | QLIVRNFWSDETRLPSNTTERMLAILSSLYSPKIEKHYSLATNLLLEMTSKSPDYIRKM   | 2598 |
| STERLET   | QLYVRNFWSHESRLPTSTLERMLVVLRSLYSKIEAHYLSLATNLLLEMTSRSPDYTRDM   | 2600 |
| GAR       | QLYVRNFWSHETRLPTTTLERMLVILRSLYSKIEAQYLSLATNLLLEMTSRSPDYSRAI   | 2589 |
| LATIMERIA | QLYVRNFWSDENRLPVGTDRMLVILKAFYCNKIETQYLSLATNLMLEMTSRSPDYTREI   | 2588 |
| CAECIL    | QLTVRNFWSDETRLPVVTTDRMLALLNSFYSPKIESHYLSLATNFLEMTSKSPDYTRE    | 2590 |
| SNAKE     | QLIVRNFWSDETRLPTNTLDRMLSLRGLYSKIEQYLSLATNFLEMTSKSPDYSRKM      | 2586 |
| CANARY    | QLIVRNFWSHETRLPTNTLDRMLSLSSFYSTKIEHYLSLATNFLEMTSKSPDYSRKI     | 2579 |
| OSTRICH   | QLIVRNFWSDETRLPANILDRMLALLNSFYSTKIEQYLSLATNFLEMTSKSPDYSRKM    | 2549 |
| GECKO     | QLIVRNFWGDETRLPGNLDRMLTLLSSLYSTKIEQYLSLATNFLEMTSKSPDYSRKM     | 2588 |
| TURTLE    | QLIVRNFWSDETRLPTNTLDRMLALLNSFYSTKIEQYLSLATNFLEMTSKSPDYSRKM    | 2588 |
| ALLIGATOR | QLVVRNFWSDETRLPTNTLDRMLALLNSFYSTKIEQYLSLATNFLEMTSKSPDYSRKI    | 2546 |
| PLATYPUS  | QLIVRNFWSDNETRLPSNILDRLA-LNSFYSTKIEMHYLSLATNFLEMTSKSPDYSRHI   | 2580 |
| TASDEVIL  | QLIIRNFWSHETRLPSNILDRLA-LRSLYSTKIEMHFLSLATNFLEMTSKSPDYSRHI    | 2582 |
| HUMAN     | QLIIRNFWSHETRLPSNTLDRLLA-LNSLYSPKIEVHFSLATNFLEMTSMSPDYPNPM    | 2576 |
| MOUSE     | QLIIRNFWSHETRLPSNTLDRLLA-LNSLYSPKIEVHFSLATNFLEMTSMSPDYLNPI    | 2572 |

\*\* : \* \* \* \* . \* . \* \* \* : \* : \* \* : \* . : \* : \* : \* : \* : \* : \* \* \* \* \* \* \* \* : . :

**M-HEAT/CIRCULAR CRADLE**

Supplementary Figure 1. DNA-PKcs, jawed vertebrates

|              |                                                                                                                                                                   |      |
|--------------|-------------------------------------------------------------------------------------------------------------------------------------------------------------------|------|
| DANIO        | <b>FEFPLSECKFQDY</b> TIDSNWRMRSTVLT <b>PMFVETQ</b> ATOGAEAGS <b>Q</b> -----AATVRGQ <b>IR</b>                                                                      | 2640 |
| MILII        | <b>FEYPLSECKFQD</b> YNIDSS <b>WQQR</b> STILTPMFVET <b>Q</b> ATQNSRSRS <b>Q</b> SEGLTAQGTIGGL <b>VR</b>                                                            | 2647 |
| BAMBOO       | <b>FEYPLSECKFQD</b> YSIDSS <b>WHQ</b> RSRILTP <b>PLFVETQ</b> ASAGSIKRSS <b>Q</b> EASTVDQNTIGGQ <b>IR</b>                                                          | 2642 |
| XENOPUS      | <b>FEHPLSECKFQD</b> YTVDS <b>SWRFR</b> STVLT <b>PMFVETQ</b> LSQSMQRSRA <b>Q</b> -GTIEADEPIGGQ <b>LR</b>                                                           | 2657 |
| STERLET      | <b>FEYPLSDCKFQD</b> YIIDS <b>NWRHR</b> STVLT <b>PMFVETQ</b> VTOGGTQYH <b>T</b> OD---SPQGTIGGQ <b>VR</b>                                                           | 2657 |
| GAR          | <b>FEYPLSECKFH</b> DYIIDSS <b>WHHR</b> NTVLT <b>PMFVETQ</b> ASQGGSR <b>YQ</b> SRGGSASAQ <b>Q</b> SLGGQ <b>LR</b>                                                  | 2649 |
| LATIMERIA    | <b>FEHPLSECKFQD</b> YIIDSN <b>WRHR</b> STVLT <b>PMFVETQ</b> ASQ <b>S</b> TARFR <b>S</b> QEGPEQ <b>VQ</b> QSLGGQ <b>VR</b>                                         | 2648 |
| CAECIL       | <b>FEHALSECKFQD</b> YTI <b>DSNWR</b> YHSTVLT <b>PMFVETQ</b> ASLSASR <b>YRS</b> QEGSFPAQ <b>S</b> SLGGQ <b>VR</b>                                                  | 2650 |
| SNAKE        | <b>FEYPLSECKFQD</b> FVIDSN <b>WR</b> YRSTILTP <b>MFVETQ</b> ASQSA-----ITQEGYLG <b>Q</b> LR                                                                        | 2637 |
| CANARY       | <b>FEHPLSECKFQD</b> FVVDSS <b>WR</b> YRSTVLT <b>PMFVETQ</b> ASPSTHR <b>NLS</b> QERSLSPSG <b>S</b> VRGQ <b>VR</b>                                                  | 2639 |
| OSTRICH      | <b>FEHPLSECKFQD</b> FVIDSS <b>WR</b> YRSTVLT <b>PLFVETQ</b> ASQSTNR <b>SLL</b> QERSPSTSG <b>S</b> GGGR <b>VR</b>                                                  | 2609 |
| GECKO        | <b>FEYPLSECKFQ</b> EFAVDSS <b>WRFR</b> STVLT <b>PMFVETQ</b> ASQ <b>N</b> PSRHR <b>P</b> GGSL <b>L</b> THGSMG <b>Q</b> LR                                          | 2648 |
| TURTLE       | <b>FEHPLSECKFQD</b> FTIDSN <b>WR</b> YRSTVLT <b>PMFVETQ</b> ATQSAK <b>RNR</b> SQEGSL <b>S</b> TQGS <b>L</b> GGQ <b>VR</b>                                         | 2648 |
| ALLIGATOR    | <b>FEHPLSECKFQD</b> FIIDS <b>NWR</b> YRSTILTP <b>MFVETQ</b> ASQ <b>S</b> ASR <b>KRS</b> QEGSL <b>S</b> TPGS <b>Q</b> GAQ <b>VR</b>                                | 2606 |
| PLATYPUS     | <b>FEHPLSECKFQ</b> EYTI <b>DSNWR</b> FRSTVLT <b>PMFVETQ</b> ASQ <b>S</b> ALRS <b>S</b> QEGLL <b>P</b> QG <b>L</b> LL <b>Q</b> LR                                  | 2640 |
| TASDEVIL     | <b>FEHPLSDCKFQ</b> EYSID <b>SDWR</b> YRSTVLT <b>PMFVETQ</b> ASQ <b>N</b> S <b>T</b> RNR <b>S</b> QEGSL <b>S</b> LR <b>P</b> RL <b>L</b> TK <b>Q</b> IR            | 2642 |
| <b>HUMAN</b> | <b>FEHPLSECKFQ</b> EYTI <b>DS</b> DWRFRSTVLT <b>PMFVETQ</b> ASQ <b>G</b> TL <b>Q</b> TR <b>T</b> QEGSL <b>S</b> AR <b>W</b> PV <b>A</b> G <b>Q</b> IR <b>2636</b> |      |
| MOUSE        | <b>FEHPLSECKFQ</b> EYTI <b>D</b> PDWRFRSTVLT <b>PMFVETQ</b> AS <b>P</b> SILHT <b>Q</b> TQEGPL <b>S</b> D <b>Q</b> R <b>Q</b> K <b>P</b> G <b>Q</b> VR             | 2632 |

\*\* . \*\*:\* :\*:: :\* .\*: :. :\*\*\*:\*:\* : : .  
T2609  
S2612 T2620

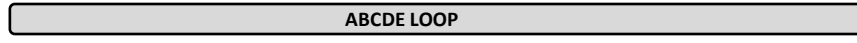

|              |                                                                                                                                                                                                                                                                                    |      |
|--------------|------------------------------------------------------------------------------------------------------------------------------------------------------------------------------------------------------------------------------------------------------------------------------------|------|
| DANIO        | A <b>Q</b> TSLE <b>F</b> S <b>Q</b> LAPGAGR <b>S</b> AY <b>N</b> W <b>L</b> TG <b>S</b> S <b>V</b> D <b>T</b> LADYSLSS---DSLSS <b>L</b> L <b>V</b> FDK <b>K</b> R <b>S</b> ERP                                                                                                     | 2697 |
| MILII        | G <b>Q</b> THY <b>E</b> F <b>T</b> P <b>Q</b> Q <b>N</b> --PDAR <b>-</b> FN <b>W</b> L <b>T</b> G <b>N</b> S <b>L</b> D <b>T</b> FAEYSLPSLASEPGSS <b>S</b> L <b>L</b> V <b>F</b> S <b>R</b> W <b>S</b> ER <b>L</b>                                                                 | 2704 |
| BAMBOO       | A <b>L</b> THY <b>E</b> F <b>T</b> P <b>Q</b> Q <b>N</b> --SGAR <b>-</b> FN <b>W</b> L <b>T</b> G <b>S</b> S <b>L</b> D <b>T</b> FAEYTL <b>P</b> S <b>-</b> ESASS <b>L</b> L <b>V</b> Y <b>S</b> K <b>R</b> S <b>E</b> R <b>L</b>                                                  | 2697 |
| XENOPUS      | A <b>Q</b> QHY <b>Q</b> F <b>T</b> P <b>Q</b> Q <b>N</b> --IGGR <b>S</b> S <b>F</b> N <b>W</b> L <b>T</b> G <b>S</b> S <b>M</b> D <b>T</b> LADY <b>S</b> V <b>E</b> S <b>-</b> PESLPS <b>A</b> L <b>L</b> F <b>V</b> N <b>K</b> R <b>N</b> ENV                                     | 2713 |
| STERLET      | A <b>Q</b> QA <b>L</b> E <b>F</b> T <b>Q</b> Q <b>A</b> --AGR <b>R</b> S <b>S</b> F <b>N</b> W <b>L</b> T <b>G</b> S <b>I</b> D <b>T</b> LSEYSL <b>P</b> S <b>-</b> ADSVSS <b>S</b> L <b>L</b> V <b>F</b> G <b>K</b> R <b>G</b> D <b>K</b> S                                       | 2714 |
| GAR          | A <b>Q</b> STLE <b>F</b> T <b>P</b> Q <b>D</b> --PGR <b>R</b> A <b>S</b> F <b>N</b> W <b>L</b> T <b>G</b> S <b>S</b> V <b>D</b> T <b>L</b> SEYAL <b>P</b> A <b>T</b> -SDSLSS <b>S</b> L <b>L</b> V <b>F</b> G <b>K</b> W <b>G</b> E <b>K</b> Q                                     | 2706 |
| LATIMERIA    | A <b>Q</b> V <b>Q</b> F <b>D</b> F <b>T</b> P <b>Q</b> Q <b>N</b> --TGIR <b>S</b> S <b>F</b> N <b>W</b> L <b>T</b> G <b>S</b> S <b>V</b> D <b>T</b> FAEYSL <b>P</b> S <b>-</b> SESLASS <b>L</b> L <b>A</b> Y <b>G</b> K <b>R</b> S <b>E</b> K <b>S</b>                             | 2705 |
| CAECIL       | A <b>Q</b> Q <b>Q</b> Y <b>E</b> F <b>T</b> P <b>Q</b> Q <b>N</b> --IGGR <b>S</b> S <b>F</b> N <b>W</b> L <b>T</b> G <b>S</b> S <b>I</b> D <b>T</b> LAEYGV <b>P</b> S <b>-</b> SESLSS <b>S</b> L <b>L</b> F <b>A</b> S <b>K</b> K <b>S</b> E <b>K</b> S                            | 2707 |
| SNAKE        | A <b>Q</b> Q <b>Q</b> F <b>E</b> F <b>T</b> P <b>Q</b> Q <b>N</b> --ISGR <b>S</b> S <b>F</b> N <b>W</b> L <b>I</b> G <b>N</b> S <b>V</b> D <b>T</b> FT <b>N</b> ST <b>V</b> P <b>S</b> S <b>-</b> SESV--S <b>M</b> L <b>L</b> I <b>K</b> R <b>T</b> D <b>R</b> S                   | 2692 |
| CANARY       | A <b>Q</b> QR <b>Q</b> Y <b>E</b> F <b>T</b> P <b>Q</b> Q <b>H</b> --GSGR <b>S</b> S <b>F</b> N <b>W</b> L <b>T</b> G <b>S</b> S <b>I</b> D <b>T</b> LAEYAV <b>P</b> S <b>-</b> SESLSS <b>S</b> M <b>L</b> L <b>V</b> S <b>K</b> R <b>S</b> E <b>K</b> F                           | 2696 |
| OSTRICH      | V <b>Q</b> Q <b>Q</b> Y <b>E</b> F <b>T</b> P <b>Q</b> Q <b>N</b> --ISGR <b>S</b> S <b>F</b> N <b>W</b> L <b>T</b> G <b>N</b> S <b>I</b> D <b>T</b> LAEY <b>M</b> V <b>P</b> S <b>F</b> -SESLSS <b>S</b> M <b>L</b> L <b>V</b> S <b>K</b> R <b>S</b> E <b>K</b> F                  | 2666 |
| GECKO        | A <b>Q</b> Q <b>Q</b> Y <b>E</b> F <b>T</b> P <b>Q</b> Q <b>T</b> --IGGR <b>S</b> S <b>F</b> N <b>W</b> L <b>L</b> G <b>N</b> S <b>V</b> D <b>T</b> FAEY <b>S</b> V <b>T</b> S <b>-</b> SESLSS <b>S</b> M <b>L</b> L <b>T</b> H <b>K</b> H <b>A</b> D <b>R</b> S                   | 2705 |
| TURTLE       | A <b>Q</b> Q <b>Q</b> Y <b>E</b> F <b>T</b> P <b>Q</b> Q <b>N</b> --VNGR <b>S</b> S <b>F</b> N <b>W</b> L <b>T</b> G <b>S</b> S <b>I</b> D <b>T</b> LAEY <b>T</b> V <b>P</b> S <b>-</b> SESLSS <b>S</b> M <b>L</b> F <b>V</b> S <b>K</b> R <b>S</b> E <b>K</b> S                   | 2705 |
| ALLIGATOR    | A <b>Q</b> Q <b>Q</b> Y <b>E</b> F <b>T</b> P <b>Q</b> Q <b>N</b> --MSGR <b>S</b> S <b>F</b> N <b>W</b> L <b>T</b> G <b>S</b> S <b>I</b> D <b>T</b> L <b>T</b> EY <b>T</b> V <b>P</b> S <b>-</b> SESLSS <b>S</b> M <b>L</b> F <b>V</b> N <b>K</b> R <b>S</b> E <b>K</b> S          | 2663 |
| PLATYPUS     | A <b>Q</b> - <b>Q</b> Y <b>E</b> F <b>T</b> P <b>Q</b> Q <b>N</b> --TDGR <b>N</b> S <b>F</b> N <b>W</b> L <b>T</b> G <b>S</b> S <b>V</b> D <b>T</b> FD <b>Y</b> P <b>G</b> P <b>T</b> S <b>-</b> SESL <b>S</b> - <b>T</b> L <b>L</b> F <b>T</b> H <b>K</b> K <b>S</b> R <b>T</b>   | 2695 |
| TASDEVIL     | A <b>Q</b> Q <b>Q</b> Y <b>E</b> F <b>T</b> P <b>Q</b> Q <b>N</b> --IAGR <b>N</b> S <b>F</b> N <b>W</b> L <b>T</b> G <b>S</b> S <b>I</b> D <b>T</b> LADY <b>T</b> I <b>P</b> S <b>L</b> -SESLSS <b>S</b> L <b>L</b> F <b>V</b> H <b>K</b> R <b>T</b> D <b>K</b> P                  | 2699 |
| <b>HUMAN</b> | A <b>Q</b> Q <b>Q</b> H <b>D</b> F <b>T</b> L <b>Q</b> T <b>-</b> ADGR <b>S</b> S <b>F</b> D <b>W</b> L <b>T</b> G <b>S</b> S <b>T</b> D <b>L</b> V <b>D</b> H <b>T</b> S <b>P</b> S <b>-</b> -----SD <b>S</b> L <b>L</b> F <b>A</b> H <b>K</b> R <b>S</b> ER <b>L</b> <b>2688</b> |      |
| MOUSE        | A <b>Q</b> Q <b>Q</b> Y <b>D</b> F <b>T</b> P <b>Q</b> Q <b>A</b> --SVER <b>S</b> S <b>F</b> D <b>W</b> L <b>T</b> G <b>S</b> S <b>I</b> D <b>L</b> LAD <b>H</b> T <b>V</b> F <b>S</b> --SETLSS <b>S</b> L <b>L</b> F <b>S</b> H <b>K</b> R <b>T</b> E <b>K</b> S                  | 2688 |

\* :\* : \* \* :\*\*\* \* \* \* : : : : :  
T2638 T2647

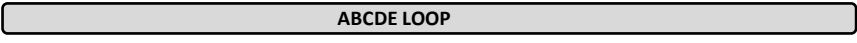

Supplementary Figure 1. DNA-PKcs, jawed vertebrates

|              |                                                                                            |             |
|--------------|--------------------------------------------------------------------------------------------|-------------|
| DANIO        | Q-----AAWRAV <b>GAGFGSKRLTATSDDT</b> DSRTAAERERRAD <b>ILRLRRRFLKDKEKESIKF</b>              | 2752        |
| MILII        | HR----PAKK <b>PVGPDFGKKRLALPGDEV</b> DSKTKGIVDQ <b>ADILRLRRRFLKDREKVSILF</b>               | 2760        |
| BAMBOO       | QK----P-M <b>KPVGPDFGQKRLAIPGDEV</b> DAKTKAVADQ <b>ADILRLRRRFLKDRQKENLIF</b>               | 2752        |
| XENOPUS      | RR----V <b>PLKPLGPNFGMRRLLGLPGDV</b> TDSTTK-SMEDR <b>SDILRLRRRFLKDREKLSLIY</b>             | 2768        |
| STERLET      | QQ----A <b>ARKPVGSDFGKKRLGLPGDEV</b> DSRTK-VKDQ <b>ADILRLRRRFLKDQEKVSILY</b>               | 2769        |
| GAR          | QQQQ <b>QRGPKPVGADFGKKRLALPGDEV</b> DSRKKAVNDQ <b>ADILRLRRRFLKDQEKVSLQF</b>                | 2766        |
| LATIMERIA    | QR----A <b>AMKPVGPDFGKKRLALPGDEV</b> DSRTK-VADQ <b>RLDILRLRRRFLKDQEKVSILY</b>              | 2760        |
| CAECIL       | RR----T <b>SLKPLGPNFGKKRLGLPGDEV</b> DSKAK-GIDDR <b>SDILRLRRRFLKDQGQISKIF</b>              | 2762        |
| SNAKE        | YK----T <b>AFKPLSPNFGKKRQGLPGDEV</b> DNKSK-DTDE <b>HTEILRLRRRFLKDKEKLSLIY</b>              | 2747        |
| CANARY       | KQ----A <b>TFKPVGPDFGKKRLGLPGDEV</b> DSKTK-GIEER <b>AELRLRRRFLKDQDKLSLIY</b>               | 2751        |
| OSTRICH      | KQ----S <b>AFKPVGPDFGKKRLGLPGDEV</b> DSKIK-GIDER <b>AELRLRRRFLKDQEKLSLIY</b>               | 2721        |
| GECKO        | QR----A <b>AFKPLGPNFGKRLGLPGDEV</b> DSKTK-GIDER <b>AELRLRRRFLKDQEKLSLIY</b>                | 2760        |
| TURTLE       | QR----A <b>TLKPLGPNFGKKRLGLPGDEV</b> DSKAK-GIDER <b>AELRLRRRFLKDQEKLSLIY</b>               | 2760        |
| ALLIGATOR    | QR----G <b>TLKPVGPNFGKKRLGLPGDEV</b> DSKTK-DINER <b>AELRLRRRFLKDQEKLSVIY</b>               | 2718        |
| PLATYPUS     | QK----A <b>GFKPLGPNFGKKRVGLPGDEV</b> DSKTK-GIEER <b>TEILRLRRRFLKDQEKLSLIY</b>              | 2750        |
| TASDEVIL     | QR----A <b>AWKSVGPNFGKKRLGLPGDEV</b> DNKTK-GIDER <b>AELRLRRRFLKDQEKLSLIY</b>               | 2754        |
| <b>HUMAN</b> | <b>QR----APLKS</b> <b>VGPDFGKKRLGLPGDEV</b> <b>DNKVK-GAAGR</b> <b>TDILRLRRRMRDQEKLSLMY</b> | <b>2743</b> |
| MOUSE        | QR----M <b>SKSVGPDFGTTKRLGLPDDEV</b> DNQVKS <b>GTSPQADILRLRRRFLKDREKLSLLY</b>              | 2744        |

: . . . \* \* : : . \* . \* : : \* : \* \* \* \* \* : : . . :

ABCDE LOOP

|              |                                                                                                                                                                                                                                                                                     |             |
|--------------|-------------------------------------------------------------------------------------------------------------------------------------------------------------------------------------------------------------------------------------------------------------------------------------|-------------|
| DANIO        | <b>AKKEIHSQ</b> <b>TERERRADL</b> <b>KIRQDAQV</b> <b>TLYRSYRV</b> <b>GDL</b> <b>PD</b> <b>IQI</b> <b>QFSS</b> <b>LI</b> <b>AP</b> <b>LQ</b> <b>ALA</b> <b>QR</b> <b>DAT</b>                                                                                                          | 2812        |
| MILII        | <b>AKRGIREQ</b> <b>RAEQ</b> <b>KIKTEK</b> <b>RMER</b> <b>DAKVT</b> <b>LYRSYRF</b> <b>GDL</b> <b>PD</b> <b>IQI</b> <b>KYSS</b> <b>LI</b> <b>AP</b> <b>LQ</b> <b>ALA</b> <b>Q</b> <b>KD</b> <b>H</b> <b>S</b>                                                                         | 2820        |
| BAMBOO       | <b>ARKSIQEK</b> <b>H</b> <b>LAKEM</b> <b>KTEQL</b> <b>KKR</b> <b>DAQV</b> <b>TLYRCYRV</b> <b>GDL</b> <b>PD</b> <b>IQI</b> <b>KFSS</b> <b>LI</b> <b>AP</b> <b>LQ</b> <b>AVA</b> <b>Q</b> <b>KD</b> <b>H</b> <b>S</b>                                                                 | 2812        |
| XENOPUS      | <b>ARKGTAEQ</b> <b>KREK</b> <b>AIKIE</b> <b>QKMK</b> <b>QDAQ</b> <b>ITLYRN</b> <b>YRQ</b> <b>GEL</b> <b>PD</b> <b>IQI</b> <b>SYSN</b> <b>LI</b> <b>AP</b> <b>LQ</b> <b>ALA</b> <b>QR</b> <b>D</b> <b>P</b> <b>T</b>                                                                 | 2828        |
| STERLET      | <b>AKKGVREQ</b> <b>QAKEN</b> <b>VAEQ</b> <b>KLKRE</b> <b>AQV</b> <b>TLYRSYRQ</b> <b>GDL</b> <b>PD</b> <b>IQI</b> <b>QHSS</b> <b>LI</b> <b>AP</b> <b>LQ</b> <b>ALA</b> <b>QR</b> <b>D</b> <b>P</b> <b>T</b>                                                                          | 2829        |
| GAR          | <b>ARKGIQAQ</b> <b>RQEK</b> <b>ERAAE</b> <b>QTLR</b> <b>REAQV</b> <b>TLYRRYR</b> <b>HGDL</b> <b>PD</b> <b>IQI</b> <b>PYSS</b> <b>LI</b> <b>V</b> <b>PLQ</b> <b>ALA</b> <b>QR</b> <b>D</b> <b>S</b> <b>T</b>                                                                         | 2826        |
| LATIMERIA    | <b>ARKGVQIQ</b> <b>KEEQ</b> <b>KMAEL</b> <b>KMK</b> <b>QDAQV</b> <b>TLYRRYRQ</b> <b>GDL</b> <b>PD</b> <b>IQI</b> <b>HYSS</b> <b>LI</b> <b>AP</b> <b>LQ</b> <b>ALA</b> <b>QR</b> <b>D</b> <b>P</b> <b>T</b>                                                                          | 2820        |
| CAECIL       | <b>VRKGVAEQ</b> <b>KREK</b> <b>EITA</b> <b>ERK</b> <b>M</b> <b>KRD</b> <b>SEV</b> <b>TLYRSYRH</b> <b>GDL</b> <b>PD</b> <b>IQI</b> <b>AYS</b> <b>N</b> <b>LI</b> <b>AP</b> <b>LQ</b> <b>AVA</b> <b>QR</b> <b>D</b> <b>P</b> <b>T</b>                                                 | 2822        |
| SNAKE        | <b>ARKGVAEQ</b> <b>KQEK</b> <b>EIKT</b> <b>QLK</b> <b>I</b> <b>KH</b> <b>DAQ</b> <b>ITLYR</b> <b>KYRQ</b> <b>GDL</b> <b>PD</b> <b>IQI</b> <b>EYSS</b> <b>LI</b> <b>T</b> <b>PLQ</b> <b>AVA</b> <b>Q</b> <b>KD</b> <b>P</b> <b>T</b>                                                 | 2807        |
| CANARY       | <b>ARKSLAEQ</b> <b>KREK</b> <b>EIK</b> <b>SEL</b> <b>KMK</b> <b>YDAQV</b> <b>TLYRSYRV</b> <b>GDL</b> <b>PD</b> <b>IQI</b> <b>EYCS</b> <b>LI</b> <b>AP</b> <b>LQ</b> <b>G</b> <b>L</b> <b>A</b> <b>Q</b> <b>KD</b> <b>P</b> <b>T</b>                                                 | 2811        |
| OSTRICH      | <b>ARKGVAEQ</b> <b>KREK</b> <b>EMK</b> <b>SEL</b> <b>KMK</b> <b>H</b> <b>D</b> <b>Q</b> <b>V</b> <b>ILYRSYRV</b> <b>GDL</b> <b>PD</b> <b>IQI</b> <b>EYSS</b> <b>LI</b> <b>AP</b> <b>LQ</b> <b>G</b> <b>L</b> <b>A</b> <b>Q</b> <b>KD</b> <b>A</b> <b>T</b>                          | 2781        |
| GECKO        | <b>ARKGVAEL</b> <b>QEK</b> <b>EL</b> <b>KTE</b> <b>L</b> <b>KMK</b> <b>H</b> <b>DAQV</b> <b>TLYRRYRQ</b> <b>GDL</b> <b>PD</b> <b>IQI</b> <b>EYSS</b> <b>LI</b> <b>T</b> <b>PLQ</b> <b>G</b> <b>L</b> <b>A</b> <b>Q</b> <b>R</b> <b>D</b> <b>S</b> <b>T</b>                          | 2820        |
| TURTLE       | <b>ARKGVAEQ</b> <b>KREK</b> <b>EIK</b> <b>SEL</b> <b>KMK</b> <b>H</b> <b>DAQV</b> <b>TLYRSYRQ</b> <b>GDL</b> <b>PD</b> <b>IQI</b> <b>EYSS</b> <b>LI</b> <b>T</b> <b>PLQ</b> <b>G</b> <b>V</b> <b>A</b> <b>Q</b> <b>R</b> <b>D</b> <b>P</b> <b>P</b>                                 | 2820        |
| ALLIGATOR    | <b>ARKGVAEQ</b> <b>KREK</b> <b>EIK</b> <b>T</b> <b>E</b> <b>L</b> <b>T</b> <b>M</b> <b>K</b> <b>R</b> <b>DAQV</b> <b>TLYRSYRQ</b> <b>GDL</b> <b>PD</b> <b>IQI</b> <b>EYSS</b> <b>LI</b> <b>T</b> <b>PLQ</b> <b>G</b> <b>V</b> <b>A</b> <b>Q</b> <b>R</b> <b>D</b> <b>P</b> <b>T</b> | 2778        |
| PLATYPUS     | <b>AKKGVVEQ</b> <b>KREK</b> <b>EIK</b> <b>SEL</b> <b>KMK</b> <b>H</b> <b>DAQ</b> <b>ITLYRSYRQ</b> <b>GDL</b> <b>PD</b> <b>IQI</b> <b>IEHSS</b> <b>LI</b> <b>T</b> <b>PLQ</b> <b>AVA</b> <b>Q</b> <b>R</b> <b>D</b> <b>P</b> <b>T</b>                                                | 2810        |
| TASDEVIL     | <b>ARKGVVEQ</b> <b>KREK</b> <b>EM</b> <b>K</b> <b>NEL</b> <b>KMK</b> <b>H</b> <b>DAQV</b> <b>TLYRSYRQ</b> <b>GDL</b> <b>PD</b> <b>IQI</b> <b>EYSS</b> <b>LI</b> <b>N</b> <b>PLQ</b> <b>AVA</b> <b>Q</b> <b>R</b> <b>D</b> <b>P</b> <b>V</b>                                         | 2814        |
| <b>HUMAN</b> | <b>ARKGVAEQ</b> <b>KREK</b> <b>EIK</b> <b>SEL</b> <b>KMK</b> <b>QDAQV</b> <b>VLYRSYRH</b> <b>GDL</b> <b>PD</b> <b>IQI</b> <b>KHSS</b> <b>LI</b> <b>T</b> <b>PLQ</b> <b>AVA</b> <b>Q</b> <b>R</b> <b>D</b> <b>P</b> <b>I</b>                                                         | <b>2803</b> |
| MOUSE        | <b>AKRGLMEQ</b> <b>KLEK</b> <b>DIK</b> <b>S</b> <b>E</b> <b>F</b> <b>K</b> <b>M</b> <b>QDAQV</b> <b>VLYRSYRH</b> <b>GDL</b> <b>PD</b> <b>IQI</b> <b>QHSG</b> <b>LI</b> <b>T</b> <b>PLQ</b> <b>AVA</b> <b>Q</b> <b>KD</b> <b>P</b> <b>I</b>                                          | 2804        |

.: : : : : . : : : \* \* \* \* \* : : \* \* \* \* \* : : \* \* \* \* \* :

ABCDE LOOP



Supplementary Figure 1. DNA-PKcs, jawed vertebrates

|           |                                                                 |      |
|-----------|-----------------------------------------------------------------|------|
| DANIO     | LAKQLFSSLFAGVLVEMERLKSNETADILKELVQTLNAFLNKSTVYFPPFISCIQDMSY     | 2872 |
| MILII     | LAKQLFSALFSGILEEVHKSHTA-ETKDISKQLVENFNYLKATTLNFPPFVACIQDMSY     | 2879 |
| BAMBOO    | LAKQLFSSLFSGILEEVRKSKTAAEMSGIGKELLKHFTFLNNTTLCFPPFVTCIQDMSY     | 2872 |
| XENOPUS   | MAKLLFSSLFSGILTDTAS-----DISVTDKLLKQFNFLSNLSYFPPFIACVQDMCY       | 2882 |
| STERLET   | LAKQLFSSLFSGILIEMEKSKSQSEKKRI TEELLQDMNHFNLKSTLYFPPFVTCVQDMSY   | 2889 |
| GAR       | LAKQLLSTLFCGILAQMEGSKNEAEKRRITEELLQDMNHFNLKSTLYFPPFVTCVQDMSY    | 2886 |
| LATIMERIA | LAKQLFSNLFTGILTEMEKSRSDSERKTI LLELLGNFNGFLSNNTTVYFPPFVTCIQDMSY  | 2880 |
| CAECIL    | LAKQLFSSLFSGIMKEMDKLKSSEMKDI TQKLLADFNRFLNITTSYFPPFVACIQDMSY    | 2882 |
| SNAKE     | LAKQLFSSLFSGILEQMKSPLAERNNI IQQLLHDFNHFLLTTSVLYFPPFIACILEMTY    | 2867 |
| CANARY    | FAKQLFSSLFSGIFHEVKKSKHPSEKNAI VQKLLNDFNFLSMLSYSYFPPFIACIQEMSY   | 2871 |
| OSTRICH   | FAKQLFSSLFSGILREVEKSKTPSEKKI I IQQLLKDFNQFLSMLSYSYFPPFIACIQEMSY | 2841 |
| GECKO     | LAKVLFSSLFAGILEEMRKSQSEKNSI IQQLVQDFNCFLLTTSVLYFPPFIACVQEMSY    | 2880 |
| TURTLE    | LAKQLFSSLFSGILKEMNFKNPSEKNCI TQELLQNFNRFLSMTVSYFPPFIACIQEMSY    | 2880 |
| ALLIGATOR | LAKQLFSSLFSGILKEMENSKSPLEKTHI VQKLLQNFNDFLSISVSYFPPFISCIQEMSY   | 2838 |
| PLATYPUS  | LAKQLFSSLFAGILKEIDKFKSQSEKRNITL KLLQDFNHFLLSSTVVSFPPFISCIQEMSF  | 2870 |
| TASDEVIL  | LAKQLFGSLFAGILKEMDKFKSPSEKSI TEKLLLDNFNYFLSSTMLFPPFISCIQEMSY    | 2874 |
| HUMAN     | I AKQLFSSLFSGILKEMDKFKTLSEKNNITQKLLQDFNRFLLNTTFSFPPFVSCIQDISC   | 2863 |
| MOUSE     | I AKQLFSSLFSGILKEMNKFKTSEKNIITQNLQDFNRFLLNTTFLFPPFVSCIQEI SC    | 2864 |

FAT

|           |                                                               |      |
|-----------|---------------------------------------------------------------|------|
| DANIO     | HHKALLGVEPSLVSATCLASLQQPMGILLLEESLLHGAGASEPPLKRARG---KRELPP   | 2929 |
| MILII     | QHKDLLGLDSTSVRSTSLASLQQPMGILLLEKSLIHSTN-EPPTKKARG---RQELPP    | 2935 |
| BAMBOO    | KHPDLLNLDPSIVSSTALVSLQQPMGIMLLESLMHLSLP-EPPAKRSRG---RTQLPP    | 2928 |
| XENOPUS   | QHDELLHLNPNANISTSCLASLQQPLGILLLEKGLLHMKVP-DEPPAKMRKEKEKAEIPP  | 2941 |
| STERLET   | RHKELLNIEPSSVSSSSCLASLQQPMGILLLEESLIKGLVP-EPPAKRARG---RRELPP  | 2945 |
| GAR       | QYKELLKVDPSAVSSSSCLASLQQPMGILLLEESLIRGSVP-DEPPSKRARG---HRELPP | 2942 |
| LATIMERIA | QHAELNLDPASVSASCLASLQQPMGVLLLEQGLIQLLAA-EPPAKRARG---RKELPP    | 2936 |
| CAECIL    | HTELLNLDPSNVSTSCLASLQQPVGILLLEERSLMSLVDI-EPPRKKMRG---KTELSP   | 2938 |
| SNAKE     | LHEELLDLNCYSVSTSCLASLQQPMGILLLEQALVHLFPVEQPPSKMRG---KTELSP    | 2924 |
| CANARY    | QHRELELDSANVSTSCLASLQQPMGILLLEERLALMALSPA-EPPSKMRG---RTELPP   | 2927 |
| OSTRICH   | QHRELELDSANVSTSCLASLQQPVGILLLEHALISLSPA-EPPSKRVCG---RAELPP    | 2897 |
| GECKO     | QHKELLDLNPSSVSTSCLASLQQSVGILLLEQALVHLSSEEEPPAKMRG---KTDLSP    | 2937 |
| TURTLE    | QHRELLDLSATVSTSCLASLQQPVGILLLEQALTRLSE-EPLSKMRG---RAALSP      | 2936 |
| ALLIGATOR | QHKELLDIDSTSVSTSCLASLQQPVGILLLEQALIHLSI-EPPAKRMRG---RTELSP    | 2894 |
| PLATYPUS  | QHTELLNLDANCVSTSCLASLQQPVGILLLEQALIRLGPP-EPPSKKRRG---KPQLPP   | 2926 |
| TASDEVIL  | QHSELLSLDSTTVSTSCVLSLQQPVGILLLEKALIHLSI-EPPSKMRG---KPQLSP     | 2930 |
| HUMAN     | QHAALLSLDPAAVSAGCLASLQQPVGIRLLEEALLRLLPA--ELPAKVRG---KARLPP   | 2918 |
| MOUSE     | QHPDFLLDPAVVRVGCASLQQPGGIRLLEEALLRLLMPK--EPPTKVRG---KTCLPP    | 2919 |

FAT



Supplementary Figure 1. DNA-PKcs, jawed vertebrates

|              |                                                                     |             |
|--------------|---------------------------------------------------------------------|-------------|
| DANIO        | DT--ERWIHLAKLYRSLGDYDVVRGIFSGKIGTKSITFTALQAEAKSDYAEAVKLYNEAL        | 2987        |
| MILII        | DTDVARWIELATLYRSLGDYDVLRGIFSEKIGTKPLTHTALLAEAKSDYAEAVRLYDQAL        | 2995        |
| BAMBOO       | DT--ARWIELAKLYRSLGDYDVLRGIFSEKIGTKSTQKALLAEAKSDYAEAVQLYDQAL         | 2986        |
| XENOPUS      | DI--VRWIELAKLYRSIGDYDVLRGIFSGKIGAKSITQCALNAEAKSDYAKAAKLYDEAL        | 2999        |
| STERLET      | DT--ARWIHLAKLYRSLGDYDVLRGIFSGKIGAKSITSMALQAEAKSDYAEAVKLYNEAL        | 3003        |
| GAR          | DT--ERWIHLAKLYRSLGDYDVLRGIFSGKIGAKPVTSALQAEAKNDYSQAVKLYNEAL         | 3000        |
| LATIMERIA    | DT--IRWIELAKLYRSLGDYDVLRGIFSGMIGTKQVTKQKALLAEAKSDYSEAVRLYDEAL       | 2994        |
| CAECIL       | DV--VRWIELAKLYRSLGDYDVLRGIFSGKIGTKPHTKDALLAEAKSDYATAAKLYDEAL        | 2996        |
| SNAKE        | DV--TRWIELARLYRSVGDYDVLRGIFSGKIGTNEIHNALLAEAKSDYAEAAKLYDKAL         | 2982        |
| CANARY       | DV--IRWIELAKLYRSLGDYDALRGIFSGKIGTKEITQKALLAEARNDYAEAAQYDKAL         | 2985        |
| OSTRICH      | DV--IRWIELAKLYRSLGSDVLRGIFSGKIGTKEITQKALLAEARSDYATAAKHYDEAL         | 2955        |
| GECKO        | DV--IRWIELAKLYRSVGDYDVLRGIFSGRIGTKEVTQKALLAEANSDYAEAAKQYDEAL        | 2995        |
| TURTLE       | DV--IRWIELAKLYRSVGDYDVLRGIFSGKIGTKEITQKALLAEARSDYAEAAKQYDEAL        | 2994        |
| ALLIGATOR    | DV--IRWIELAKLYRSVGDYDVLRGIFSGRIGTKEITQKALLAEAKSDYVEAVKQYDEAL        | 2952        |
| PLATYPUS     | DV--VRWIELAKLYRSVGEYDVLRGIFSGEIGTKHVQIALLAESKSDYSEAAKQYNEAL         | 2984        |
| TASDEVIL     | DV--IKWIELAKLYRSIGEYDVLRGIFSGEIKTKPVTONALLAEAKNDYSEAAKQYNEAL        | 2988        |
| <b>HUMAN</b> | <b>DV--LRWVELAKLYRSIGEYDVLRGIFTSEIGTKQITQSALLAEARSDYSEAAKQYDEAL</b> | <b>2976</b> |
| MOUSE        | DV--LRWVELAKLYRSIGEYDVLRGIFSGSELGTTQDTQKALLAEARSDYCCAAKLYDEAL       | 2977        |

\* :.:\* \*::\*: :.:\*::: : :. \* \*\* \*::..\*\* \*.:\*::\*\*

FAT

|              |                                                                     |             |
|--------------|---------------------------------------------------------------------|-------------|
| DANIO        | NKEDWDDGEPITTEKDFWEIAALEAYNHLTEWKSLEYCATVNIIDDSSPIRLDRMWTETFY       | 3047        |
| MILII        | NTEEWMDGNPMEATEKDFWEIAALECYNHLTEWKALEYCS TVNIDDKTPADIEINIWSDTFY     | 3055        |
| BAMBOO       | NTEEWVDGNPTDAEKDFWELAALECYSHLTEWKSLEYCS TVNISDKTPVDLEIDIWDPFY       | 3046        |
| XENOPUS      | T-ETFSGDPTDAEKDFWELASLECYNHLTEWKPLEYCS TVNIDTGKPPDLNKMWSDPFY        | 3058        |
| STERLET      | NTEEWTDGEPAAEAEKDLWEIAALESYSHLTEWKSLOQCS TVNIDSSPADLEKIWGDPFY       | 3063        |
| GAR          | NTEEWMDGEPTEKDFWEIAALECYNHLSEWKSLOQCATVNIIGDSSPVDLEKMWSDPFY         | 3060        |
| LATIMERIA    | NVEEWPDGEPTEAEKDFWELAALECYSHLTEWKALEYCS TVNIDDKTPADLENIWNDPFY       | 3054        |
| CAECIL       | NMPDWSNDEPTEAEKDFWEVAALECYNRLTEWKPLEYCS TVNIDSSKPADLNKIWNDFY        | 3056        |
| SNAKE        | SIQDWPGEPTAEAEKDFWKIASLECYNHLTEWKSLEYRLTVNIDNGQPADLNKIWSDPFY        | 3042        |
| CANARY       | SQEDWQDGEPTAEAEKDFWELASLECYDHLTEWKSLEYCATVNIIDSGKPPDLSKTWNDPFF      | 3045        |
| OSTRICH      | SKEDWQDGEPTAEAEKDFWELASLECYDHLTEWKSLEYCATVNIIDSGQPPDLNKTWNDPYY      | 3015        |
| GECKO        | SKQDWPDEEPIEAEKDFWELASLECYDHLTEWKSLEYCS TVNIDDKQPPDLNKTWSNPFY       | 3055        |
| TURTLE       | SKQDWPGEPTAEAEKDFWELASLECYNHLTEWKSLEYCS TVNIIDSGQPPDLNKTWSDPFY      | 3054        |
| ALLIGATOR    | SKQDWSDEGPSEAEKDFWELASLECYDHLTEWKSLEYCS TLNIDSEQPADLNKTWSDPFF       | 3012        |
| PLATYPUS     | NMQHWEDGEPSEAEKDFWELAVLECYNHLTEWKSLEYCS TVNIDSESPDLNKIWNDFY         | 3044        |
| TASDEVIL     | NTQEWLEGDPTEAEKDFWELAALECYNHLTEWKSLEYCS TINVDSENPPDLSKMWSEPFY       | 3048        |
| <b>HUMAN</b> | <b>NKQDWDGEPTEAEKDFWELASLDCYNHLAEWKSLEYCS TASIDSENPPDLNKIWSEPFY</b> | <b>3036</b> |
| MOUSE        | NKLEWVDGEPTEAEKEFWELASLDCYNHLSEWKSLEYCS TVNIVSENSLDLKMWSEPFY        | 3037        |

. : \* ::::\*. \*::\*::: \*\* \*\* \* :. :. \* : : :

FAT

Supplementary Figure 1. DNA-PKcs, jawed vertebrates

|           |                                                                  |      |
|-----------|------------------------------------------------------------------|------|
| DANIO     | VETYLQYMMRSMKQLQMGETNQDLLSFVDAAMKTEEHIIMETHYSQELSLLYIQLQEDY      | 3107 |
| MILII     | QETYLASYMIRSKVKLLQSGEVDQSLLLTFVDRAMKVEQRKAVIETYSQELSLLYIQLQDDV   | 3115 |
| BAMBOO    | MEAYLPHMMRSKVKLLQLGENDQSLLLTFVDNAMKVDQRKTVIETRYSQELSLLYIQLQDDF   | 3106 |
| XENOPUS   | QETYLPYMIRSKLKLMLLGGNNDQSLLLTFVDEAMKVEQRKVLMEFTFYSQELSLLYIQLQDDF | 3118 |
| STERLET   | QEAYLPHYVMSKVKLLQLGEPDQSLLLTFVDNAMKVEERKSIETSYQELSLLYIQLQDDF     | 3123 |
| GAR       | QEAYLPHYVVRGMVKQLQLGGDQSLLLTFVDNAMKVEERKSVMETNYSQELSLLYIQLQDDY   | 3120 |
| LATIMERIA | QETYLPYLMRSKVKLLLLQGDDQSLLLTFIDNAMKVEERKALLETHYSQELSLLYIQLQDDF   | 3114 |
| CAECIL    | QETYLPYMIRSKVKLLLQGGDDQSLLLTFIDNAMKVEQRKALLETNYNQELSLLYIQLQDDF   | 3116 |
| SNAKE     | QEAYLPYVIRSKLKLFLHGGSDQSLLLTFIDEAMKAEKKALIEMYYSQELSLLYIQLQDDF    | 3102 |
| CANARY    | QETYLPYIIRSKLKLMLLGGENDQSLLLTFIDEAMKTEQKKALIEMHYSQELSLLYIQLQDDF  | 3105 |
| OSTRICH   | QETYLPYIIRSKLKLMLLGGENDQSLLLTFIDEAMKTEQKKALIEMRYSQELSLLYIQLQDDF  | 3075 |
| GECKO     | QETYLPYIIRSKLKLMLLHGGDDQSLLLTFIDEAMKTEQKKALIEMYYSQELSLLYIQLQDDF  | 3115 |
| TURTLE    | QETYLPYIIRSKLKLMLLHGGDDQSLLLTFIDEAMKIEQRKALIEMYYSQELSLLYIQLQDDF  | 3114 |
| ALLIGATOR | QETYLPYIIRSKLKLMLLHGGSDQSLLLTFIDEAMKIEQRKALIEMHYSQELSLLYIQLQDDF  | 3072 |
| PLATYPUS  | QETYLPYIIRSKLKLMLLHGGSDQSLLLTFIDEAMKKEKQKTLIEHYSQELSLLYIQLQDDF   | 3104 |
| TASDEVIL  | QETYLPYIIRSKLKLMLLHGGSDQSLLLTFIDEAMKKEPQKTLIEVHYSQELSLLYIQLQDDF  | 3108 |
| HUMAN     | QETYLPYIIRSKLKLMLLHGGSDQSLLLTFIDEAMKKEPQKTLIEVHYSQELSLLYIQLQDDV  | 3096 |
| MOUSE     | QETYLPYVIRSKLKLMLLHGGSDQSLLLTFIDEAMKKEPQKTLIEVHYSQELSLLYIQLQDDI  | 3097 |

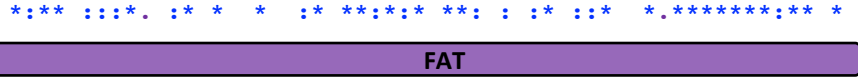

|           |                                                                |      |
|-----------|----------------------------------------------------------------|------|
| DANIO     | DRAKYYANNCMQVFMQNYSSIDPLLNSRSLTVLQSVQALTEIQDFLNYITGDV---SVNS   | 3164 |
| MILII     | DRAKYYINNMEVFMQNYSSIDTLLHRSRLTKLQSLQAVTEMQDFLHFISKEYNFISEVP    | 3175 |
| BAMBOO    | DRAKYYVNNSIQSFMQNYSSIDPLLHRSRLTKLQSLQTLTEIQDFLHFITKGSNLTSEVP   | 3166 |
| XENOPUS   | DRAKYYINNGIQVFMQNYSSIDCLLYQSRSLTKLQSVQALTEIQDFISFIRKPGNVSS--SS | 3177 |
| STERLET   | DRAKYYVNNCMQVFMQNYSSIDTLLPGSRSLTKLQSVQALTEIQDFLNFMTKDV---SQTS  | 3180 |
| GAR       | DRAKFYINNSMQVFIQNYSSIDALLYGSRLAKLQSVQALTEIQDFLYFITKDV---STAS   | 3177 |
| LATIMERIA | DRAKYYVGNCMQVFMQNYSSIDTLQHKSRLTKLQSVQALTEMQDFLGFISKPDHLNSRAS   | 3174 |
| CAECIL    | DRAKYYIDNGIQVFMQSHSSIDTLLNKSRLTKLQSVQALTETKDFIHFIKPSNLTSSQTS   | 3176 |
| SNAKE     | DRARYYVKNAMQVFMQNYSSIDSLFNRSRMIKQSVQALTEIQDFINFMSKESLTFQAS     | 3162 |
| CANARY    | DRAKYYISNGMQIFMQSYSSIDSLLYQSRITKLQSVQALTEIQDFINFMTRKSNLASEAS   | 3165 |
| OSTRICH   | DRAKYYISNGLQIFMQSYSSIDTLLHQSRMTKLQSVQTLTEIQDFIHFMTRKSNLASQAS   | 3135 |
| GECKO     | DRAKYYISNAMQVFMQNYSSIDSVLHQSRSLTKLQSVQALTEIQDFVNFISRSNGIASQAS  | 3175 |
| TURTLE    | DRAKYYISSGMQAFMQNYSSIDTLLHQSRSLTKLQSVQALTEIQDFINFIKPSNLASQAS   | 3174 |
| ALLIGATOR | DRARYYISNGMQVFMQNYSSIDALLHRSRLTKLQSVQALTEIQDFINFMREPSNLASQAS   | 3132 |
| PLATYPUS  | DRAKYYIDYCIQIFMQNYSSIDALLQSRSLTKLQSVQALTEIQDFTNFISRPSNLSSQAS   | 3164 |
| TASDEVIL  | DRAKYYIENSIQVFMQNYSSIDALLHQSRSLTKLQSVQALTEIQDFVNFMSKQGNLSSQAP  | 3168 |
| HUMAN     | DRAKYYIQNGIQSFMQNYSSIDVLLHQSRSLTKLQSVQALTEIQDFISFISKQGNLSSQVP  | 3156 |
| MOUSE     | DRATYYIKNGIQIFMQNYSSIDVLLYRSRLAKLQSVQTLAEIEEFLSFICKHGDLSLGP    | 3157 |

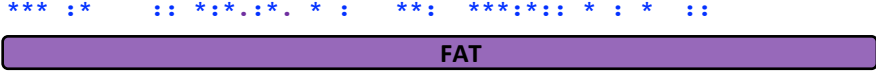

Supplementary Figure 1. DNA-PKcs, jawed vertebrates

|           |                                                                |      |
|-----------|----------------------------------------------------------------|------|
| DANIO     | LKFMIRRWTSHPYDAKLDPMNWDDIITSRCFFLDKILKRLKST---PENMEVDGADQG     | 3221 |
| MILII     | LRKLLRTWTGRYPDAKMDPMNIWDDVITNRCFFLDKIQRERLVSV--QADESMVDREGEV   | 3233 |
| BAMBOO    | LRKLVRTWIGRYPESKLDPMSVWDDVITNRCFFLDKIKERLSSL--QADDSMEVDDEGA-   | 3223 |
| XENOPUS   | LRKLFQGWMKRYPDSKMDPMNIWDDIISNRCFFLDKIQDVAVGHPQLVDESMVDDLDAG    | 3237 |
| STERLET   | LKSLIRIWTDRYPDAKMDPMNVWDDIITNRCFFLDKIAGKLTNS--EADNSMEVDGGEDT   | 3238 |
| GAR       | LKTLIRTWTHRYPDDRMDPMNVWDDVITNRCFFLDKISEKLVSS--VAGDSMEVEEDGDK   | 3235 |
| LATIMERIA | LRLLLNRWSDRYPDAKMDPMNIWDDIITNRCFFLDKIQEHLCKV--PADESMVDGEGDA    | 3232 |
| CAECIL    | LKRLRLRIWSSRYPDSKMDPMNVWDDIITNRCFFLDKIREKLPHF--QADDSMEVDGGGDA  | 3234 |
| SNAKE     | LKRLRLNIWRSRYPDTKMDPMNIWDDIITNRCFFLDKIQEKFSSST--HLDDSMELDGDAT- | 3219 |
| CANARY    | LKRLRLRTWTSRYPDAKMDPMNIWDDIITNRCFFLDKIQEKLPSD--QANDSMVEVDGEYSA | 3223 |
| OSTRICH   | LKRLRLRIWTSRYPDAKMDPMNIWDDIITNRCFFLDKIQEKLPRD--QANDSMVEVDEKDDI | 3193 |
| GECKO     | LKRLISISIMSRYPDSKMDPMNIWDDIITNRCFFLNKIQERLPNT--HLEDSMVDGGGDA   | 3233 |
| TURTLE    | LKRLRLRIWRSRYPDDKMDPMNIWDDIITNRCFFLGKIQEKLPI--QADDSMEVDGRGDV   | 3232 |
| ALLIGATOR | LKRLRLRIWTSRYPDAKMDPMNIWDDIITNRCFFLDKIQEKLNV--QADDSMEVVEAGDI   | 3190 |
| PLATYPUS  | LKRLRLRIWTSRYPDAKMDPMNIWDDIITNRCFFLNKIQEKLGL--QADDSMEVDGGGDT   | 3222 |
| TASDEVIL  | LKRLRLRIWTSRYPDAKMDPMNIWDDIITNRCFFLNKIQEKLNCL--QLDDSMVEVDGDF   | 3226 |
| HUMAN     | LKRLRLNTWTSRYPDAKMDPMNIWDDIITNRCFFLSKIEEKLTP--PEDSMNVVDQDGP    | 3214 |
| MOUSE     | LRLLLKTWTSRYPDVVTDPMHIWDDIITNRCFFLSKIEERLTAP--SGDHSMSVDEDEES   | 3215 |

\*: .: \* :\*: \*\*: :\*:\*: :\*:\*:\*: :\*:\*:\*:  
3205

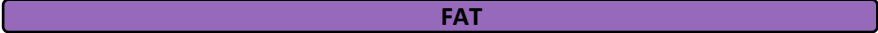

|           |                                                               |      |
|-----------|---------------------------------------------------------------|------|
| DANIO     | -----SGEELGVLVKTCKFNMKLQMAWSAWKQNNFPVASKLLKELHRHAKIDRARLL     | 3273 |
| MILII     | ETRMEVDKKEEDINMAIRSCKFNMKLKMESGTKQNNFVAMKLLKELHKESKARDWAV     | 3293 |
| BAMBOO    | ETQMDIDKEEDITMLIRSCKFNMKLKMLESARKQNNFSVSTKLLKELHKESNIRIDWRV   | 3283 |
| XENOPUS   | NEAMEVDR-QEDIAVMINKCRFTMKMKMVSARKQNNFSVAMKLLKDLHRESKTNEDWSV   | 3296 |
| STERLET   | GVKMEVDE-PEDVSGMIRGCKFSMKLMMADSARKQNNFSVATKLLKELHRESKNQEDWLV  | 3297 |
| GAR       | EIKTEAGE-WEDPDFLIKDKISMLKMAESARKQNNFSVAAKLLKALHKECKARSHWNL    | 3294 |
| LATIMERIA | SPRMDVDE-EPNISAMVQSCFNMKLKMESARKQNNFSVATKLLKELHRESKSREECLT    | 3291 |
| CAECIL    | SDRMELGGEEDITSMIKSCKFNMKLKMVESARKQNNFSVAMKLLKDLHRESKTRDDWSV   | 3294 |
| SNAKE     | -FSMEIDNENQDTHMTIKNCKFAMKMKMIECARKQNSFVALKLLKDLHGDSKTCEDWRV   | 3278 |
| CANARY    | GDQMEVDQQGENIHSMIKSCKFNMKMKMIESARKQNSFAVAKLLKDLRKEARWREDWLV   | 3283 |
| OSTRICH   | GDQMEADQQGEDISSMIRSCKFNMKMKMIESARKQNSFVAKLLKYLHREKTRDWDLV     | 3253 |
| GECKO     | NDNIEGGNEKEDIHSMIRNCKFSMKMKMIESARKQNSFVAIKLLKDLHRDSTREDWLV    | 3293 |
| TURTLE    | GDKMETDMQEEDIHSMIRSCKFNMKMKMIESARKQNSFVAMKLLKDLHRESKTRDWDLV   | 3292 |
| ALLIGATOR | GDEMEVDQQEDNIHSMIRSCKFNLMKMKMIESARKQNSFAVAKLLKDLKRESKTRDWSLV  | 3250 |
| PLATYPUS  | TDRMELEKQEDDIYSMIESCKFSMKMKMIESARSQNNFVAMKLLKDLHRESKTKDDWLV   | 3282 |
| TASDEVIL  | IDKVEVEKQEEDIYSMIRSCKFSMKMKMIESARKQNNFVAMKLLKDLHRESKTRDWDLV   | 3286 |
| HUMAN     | SDRMEVQEQEEDISSLIRSCKFSMKMKMIDSARKQNNFSLAMKLLKELHKESKTRDDWLV  | 3274 |
| MOUSE     | IDR-EVYEPKEDVRCMLQSCRFMTMKMKMIESAWKQNSFSLSMKLLKEMHKESKTRDIWRV | 3274 |

: .: \* :\*: \*\*: :\*:\*: :\*:\*:\*: :\*:\*:\*:  
FAT

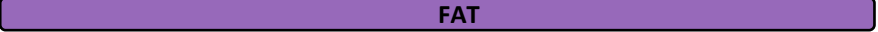

Supplementary Figure 1. DNA-PKcs, jawed vertebrates

|           |                                                                                                    |      |
|-----------|----------------------------------------------------------------------------------------------------|------|
| DANIO     | RWVHSFSRFTHKRIARLGPSEKINALLKTVP <del>LLK</del> -DAERQSEALSARMLRDQRILLGTTY                          | 3332 |
| MILII     | KWTHTYSRLSHRRSQRQARPEQVVTVLKSIP <del>LLV</del> -EINVLYLNTHTRILRDQNTLLGSSY                          | 3352 |
| BAMBOO    | RWIQSYSRFSHKRSRSMKRAEQIVTMKTI <del>P</del> LLG-EIDVGNLNIQRHAFRDQNTLLGTTY                           | 3342 |
| XENOPUS   | KWIHSYSRYSHSRSDLTCSSEQILTALKTI <del>P</del> LL-E <del>SKTEYLTKNTKACRY</del> QNM <del>LLG</del> DTY | 3355 |
| STERLET   | RWVHSFSRFSHTRSHTQSSSEQILTVLKTIP <del>L</del> LE-ERKIDYTKATTRIVRDQNI <del>LLG</del> TTY             | 3356 |
| GAR       | RWAHGFCRFKHLYSQAQDSA <del>EQILNVLKTVDVLE</del> -DSKTDPEKETAQNFRNQK <del>LLG</del> TTY              | 3353 |
| LATIMERIA | RWVHSYSRFGHSRSQSQSCPERIQTVMKTI <del>S</del> LL-E <del>SKADYLNKNTRALRD</del> QNI <del>LLG</del> TTY | 3350 |
| CAECIL    | RWIHSYCHYTHSRSQSQTSPDQVLSVIKTV <del>S</del> LL-E <del>TKADYLRNTRREFRN</del> QNI <del>LLG</del> TTY | 3353 |
| SNAKE     | KWNHSYCCFHSRSRSQSN <del>AEQILTVLKTVFLD</del> -EIKLSSVSNNAITFRNQNI <del>LLG</del> TTF               | 3337 |
| CANARY    | RWNYAYCRFTHSSSRNLSCPERVLSVLKTI <del>S</del> LL-D <del>TKSDYLSKNIMAFRN</del> QNI <del>LLG</del> TTY | 3342 |
| OSTRICH   | RWNYAYCRFTHSCSRNQSCPEQVCSVLKTI <del>S</del> LL-D <del>TKSDYLSKKTAFRN</del> QNI <del>LLG</del> TTY  | 3312 |
| GECKO     | RWNHSYCRFHSRSRSQSNPEQILTVLKTV <del>S</del> LL-E <del>ASSGTLKDRLAFRN</del> QNI <del>LLG</del> TTF   | 3352 |
| TURTLE    | RWNHSYCRFHSRSQSQNSPEQMLTVLKTI <del>S</del> LL-E <del>SKSDYLSKNIVAFRN</del> QNI <del>LLG</del> TTY  | 3351 |
| ALLIGATOR | RWNHSYCHVSHSSCQTQSSPQIILTVLKTV <del>S</del> LL-E <del>NVPDHLKSNIEILRN</del> QNI <del>LLG</del> TTY | 3309 |
| PLATYPUS  | RWNHNYCRCSHSQSQSQSSPEKILTVLKTV <del>S</del> LL-D <del>NLSSYLSKNIVASRN</del> QK <del>LLG</del> TTY  | 3341 |
| TASDEVIL  | KWNHSYCRFHSRCQIQSSSEQILTVLKTV <del>S</del> LLADENLSSYQSRNSLAFRNQNI <del>LLG</del> ITY              | 3346 |
| HUMAN     | SWVQSYCRLSHCRSRSQGCSEQVLTVLKTV <del>S</del> LLDENNVSSYLSKNILAFRDQNI <del>LLG</del> TTY             | 3334 |
| MOUSE     | QWLHSYSQLNHCRSHTQSPREQVLT <del>TKTI</del> TLLDES <del>DISNYLNKNIQASCDQ</del> SILLGTTTC             | 3334 |

FAT

|           |                                                                                                                                           |      |
|-----------|-------------------------------------------------------------------------------------------------------------------------------------------|------|
| DANIO     | DLMAGAADRSPFALETLGEEKVQKILQLSQAS--SIAQVVEGLQIQALELLRSAA <del>CKAEE</del>                                                                  | 3390 |
| MILII     | CILADALNKEPTCLQRIKEDQ <del>AE</del> R <del>V</del> IEHSGSSSEEIQEVVIGLHRKTLHYLER <del>AVR</del> KAAE                                       | 3412 |
| BAMBOO    | YIMANALNKDPSCLYIEEERAKNVK <del>KL</del> SGATSDNPVQVSI <del>GLYRKAHEYLQS</del> AV <del>KKAAE</del>                                         | 3402 |
| XENOPUS   | RIMADAVCKEPDCLYKIEDGKAGVK <del>DLS</del> ----ESPENVVGGLYR <del>KSLHYFTN</del> AV <del>RKATE</del>                                         | 3411 |
| STERLET   | HIMANALTRDGLALEHIGEDKAGK <del>VLDLLGTTSDNLEQVVVGLHRKALQHLQ</del> AV <del>KKAAE</del>                                                      | 3416 |
| GAR       | HIMASAVSRDPSVLEKIGPEKAGRV <del>LKLSGASSNPQQVTAGFHKRALGLMQS</del> AV <del>KKVED</del>                                                      | 3413 |
| LATIMERIA | NI <del>I</del> ANALNKTP <del>TSLQD</del> IGEEKARKIQ <del>DL</del> SGAQSDHPEQIVIS <del>LYRKALS</del> YLQ <del>TAA</del> KKAAE             | 3410 |
| CAECIL    | SIIANALCKDPRCLQRIDKNKADK <del>V</del> LQLSGTMS <del>ENPDEVAASLFKKS</del> FHYLDS <del>AV</del> KKAAE                                       | 3413 |
| SNAKE     | HIMANALSKERSCLNQIGEEKARKV <del>F</del> MLSEERSDNVEKVIAGL <del>NKRAF</del> LCFSG <del>AV</del> KKAAE                                       | 3397 |
| CANARY    | QIMANALSQDPRCLEQIEEKEKARKI <del>S</del> LISGESLENPKKVL <del>AGLNKKA</del> FQCF <del>S</del> AV <del>RKTEE</del>                           | 3402 |
| OSTRICH   | RIMADALSHDPRCLEQIEE <del>E</del> KARKVSVLSGESLESPEKVL <del>AGLNKRAF</del> QCFSS <del>AVR</del> KSEE                                       | 3372 |
| GECKO     | HIMANALSKDPRCLEQIV <del>E</del> EKARKV <del>L</del> VLSGEKTD <del>DDIGKVIAGLNTRAF</del> QCFSS <del>AVR</del> KAAE                         | 3412 |
| TURTLE    | HILASALSKDPGLEKIEE <del>E</del> KARKV <del>V</del> MLSGERPENSEKVIAGL <del>NKKA</del> FQYF <del>ST</del> AV <del>RKAAE</del>               | 3411 |
| ALLIGATOR | RIMAVALS <del>KDPRCLVELEEDKVRK</del> VMSLSGK <del>PDSPEKVIASLNKQAFQYF</del> SN <del>AVR</del> KAAE                                        | 3369 |
| PLATYPUS  | RIMANALSKEPASLEQIER <del>N</del> KARKV <del>M</del> ELSGASFDNVQKVIAGL <del>HRRAFQYLTH</del> AV <del>RKAAE</del>                           | 3401 |
| TASDEVIL  | NI <del>I</del> ANALSNEPTCLAQIEE <del>S</del> KAKK <del>V</del> LELSGASSED <del>AE</del> MVIGGL <del>HKKAF</del> ECLFKA <del>ARRAED</del> | 3406 |
| HUMAN     | RI <del>I</del> ANALSSEPA <del>CLA</del> EIEEDKARRI <del>LE</del> LSGSSSE <del>SEKVIAGLYQRAFQHLSE</del> AV <del>QAAE</del>                | 3394 |
| MOUSE     | RIMADALSREPA <del>CLSDLEENK</del> VNSIL <del>T</del> LSGNSAENTETVIT <del>GLYQRAFHHLSK</del> AV <del>QSAE</del>                            | 3394 |

FAT

Supplementary Figure 1. DNA-PKcs, jawed vertebrates

|           |                                                                                                                                             |      |
|-----------|---------------------------------------------------------------------------------------------------------------------------------------------|------|
| DANIO     | EEQSF SQHV NTHGIVEAYMTMANFCD RRLRESE QKEEI-SSKLQSLPEHVVKMMLKAL                                                                              | 3449 |
| MILII     | EVQSLAGEHV DIAGVIEAYVNL ANFCD RCLREKEESATAINFSEQQTFPACVVEKILKAM                                                                             | 3472 |
| BAMBOO    | EVQSLSEEHVDTVGVIKAYMTLANFCD RCLREEEEESENINNFP ELQTYPASVVENMLKAL                                                                             | 3462 |
| XENOPUS   | EEQSHSTDQIDVRGIIKAYMTLVDFCD SHLRKVEEESAVMDRADYQNFPEIMVEKMIKAL                                                                               | 3471 |
| STERLET   | ELQSRSTEHIDIPGAIEAYMTLVNFCD KRLREEEEEESAEVSTFSELPTFP AVVVDTMLKAL                                                                            | 3476 |
| GAR       | EVQSRADHVDTAGAI EAHMTLANFCD KRLREEEEEENDQVSEFSELPTFP AVVVEQVLKAL                                                                            | 3473 |
| LATIMERIA | QVQSRSTEHIDVAGVIEAYMTLVDFCD KRLREVEEESAEVSHFSELQTFP AVVVENLLRAL                                                                             | 3470 |
| CAECIL    | EVQSRAMENVDTGVIKAYMTLVDFCD THLLKKEDTTAVIDHSHLQQFP TIVVEKMIKSL                                                                               | 3473 |
| SNAKE     | EVQSSVFDHIDISGII DAYMTLANFCD SHLRKEEQNSADVN NEDLQIFPAI VVEKVIKAL                                                                            | 3457 |
| CANARY    | EVQSSVDHVD MVGVVDAYLTLISFCD QYLRREEEGLEINTVDLQQFP AVVVEKMIKAL                                                                               | 3462 |
| OSTRICH   | EVQSHSMEHV DVAGVIDSYMTLVGFCD QHLRREEEGLEINTADLQLFPAI VVEKMIKAL                                                                              | 3432 |
| GECKO     | EIQSL SFDHINTKSIIDAYMILANFCD THLRKKEEGSADINAVDLQMFPAI VVEKVIKAL                                                                             | 3472 |
| TURTLE    | EVQSHSMEHVDL TGVIDAYMTLVDFCD KHLRKEEGSSDVSALDLQTFP AVVVEKMIKAL                                                                              | 3471 |
| ALLIGATOR | EMQSR TMEHV NLTGVIDAYLTLVDFCD KHLRKEEGLSDISAVDLQTFP TIVVEKMIKAL                                                                             | 3429 |
| PLATYPUS  | EEQSHSSEHVDTGGVIDTYMTLVDFCD KHLRNEEGT SVIDAVVLQAYPALVVEKMMKAL                                                                               | 3461 |
| TASDEVIL  | EVQSH TTEHV DIAGVIDAYMTLVDFCD RHLRKEEESTSVIHTVELQTYPALVVDKMLKAL                                                                             | 3466 |
| HUMAN     | EAQPPSWSCGPAAGVIDAYMTLADFC DQQLRKEEENASVIDSAELQAYPALVVEKMLKAL                                                                               | 3454 |
| MOUSE     | ETQLSCWGH EAAA ERAHAYMTLVGFCD QQLR KVEESASQKTS AEMEAYPALVVEKMLRAL                                                                           | 3454 |
|           | : *                                            . : : : . * * *   *   *   . : :                                            *   : * . : : : : |      |

**FAT**

|           |                                                                                       |      |
|-----------|---------------------------------------------------------------------------------------|------|
| DANIO     | KLSS EEARLKFPRLLQ LVEVYPAETL DLMVREVVSVPCWLLIGWISQMMALLDKPQATAV                       | 3509 |
| MILII     | KYNSKEARLKFPRLLQ IIVKLYSAETL DLMKKEVSVPCWQFIGWINQMMAE LDKKEAVVV                       | 3532 |
| BAMBOO    | QYNSREARLKFPRLLQ IVELYPVETQDVM TRGVSTIPCWQFIGWINQMMASLDKKEACVI                        | 3522 |
| XENOPUS   | KLNSSEARLKFPRLLQ IIEQYPS ETLDLMARENCTVPCWQFIGWISQMMAM LDKKESIAV                       | 3531 |
| STERLET   | KLNSKEARLKFPRLLQ IIEELYPAETL DLMKKEVSVPCWQLIGWISQMMALLDKKEAVAV                        | 3536 |
| GAR       | KLNSSEARLKFPRLLQ IIVELYSAETL DLMKEMSSVPCWQLIGWISQMMALLDKKEAVAV                        | 3533 |
| LATIMERIA | KLNSREARLKFPRLLQ IIVELYPAETL DLMKMGGSVPCWQFIGWISQMMALLDKKEAVAV                        | 3530 |
| CAECIL    | KLNSKDARLKFPRLLQ IIVELYPAETL DLMTREVSVPCWQFIGWISQMMAM LDKKEAVAV                       | 3533 |
| SNAKE     | KLNSNEARLKFPRLLQ IIVEKYPEKILRLMAQEISSVPCWQFIGWISQLMAM LDKNEPAV                        | 3517 |
| CANARY    | KLNSREARLKFPRLLQ IIERYP AETLGLVTQELSSVPCWQFIGWISQMMALLDKDEAVAV                        | 3522 |
| OSTRICH   | KLNSREARLKFPRLLQ IIERYP AETLGLVTRELSSVPCWQFIGWISQMMALLDKDEAIAV                        | 3492 |
| GECKO     | KLDSKEARLKFPRLLQ IIVEKYPETLGLMAQEISSVPCWQFIGWISQLMAM LDKKEALAV                        | 3532 |
| TURTLE    | KLNSRDARLKFPRLLQ IIERYP AETLGLMAREISSVPCWQFIGWISQLMAM VLDKKEAVAV                      | 3531 |
| ALLIGATOR | KLNSREARLKFPRLLQ IIERYP AETLSLMAQEISTVPCWQFIGWISQMMAM VLDKDEAVAV                      | 3489 |
| PLATYPUS  | KLNSREARLKFPRLLQ IIERYP EETL DLMTQEISSIPCWQFIGWISQMMAM VLDKKEAVAV                     | 3521 |
| TASDEVIL  | KLNSKEARLKFPRLLQ IILERYPEETL NLMKEMSSIPCWQFIGWISQMMALLDKKEAVAV                        | 3526 |
| HUMAN     | KLNSNEARLKFPRLLQ IIERYP EETLSLMTKEISSVPCWQFISWISHMVAL LDKDQAVAV                       | 3514 |
| MOUSE     | KLNSSEARLKFPRLLQ IIEQYSEETL NIMTK EISSIPCWQFIGWISHMMALLDKKEAIAV                       | 3514 |
|           | : . * : * * * : * * * : * * * : : * :    : : :    : * * * : . * . * . : : * * * : : : |      |

**FAT**



Supplementary Figure 1. DNA-PKcs, jawed vertebrates

|              |                                                                       |             |
|--------------|-----------------------------------------------------------------------|-------------|
| DANIO        | OHVIEEIAECYPQALIYPYMISSENYTFEESASGQRNREFVEKLESLLDKGGVIQGFVDA          | 3569        |
| MILII        | QHIIEEIADSYPQAIIVYPLMISSESYTFEQTAGNTNKEFVERLKNKLDKGGMVEVFINS          | 3592        |
| BAMBOO       | QPIIEKIADSYPQAIIVYPFKISSENYTFEPSANGNKNKEFVERLKTLDKGGVVEVFIHS          | 3582        |
| XENOPUS      | QHIIEEIAENYPQALVYPFMVSGESYNFEDTVVGHKNREYVNRISKSLDKDNVAQDFIRA          | 3591        |
| STERLET      | QHVIKEIAEYYPQAILYPFMISSENYVFEDSATGHRNKEFVARLKSQLDKGGVVKNFIDA          | 3596        |
| GAR          | QHVIQGLAESYPQAVVYPFMISSEYQFEDSATGHRNKEFVTRLKDQLDKGGVVKDFVEA           | 3593        |
| LATIMERIA    | QHIVEKIAESYPQAIIVYVNFMISSESYTFEESPKGKNKEFVARLKSELDKGAIVEDFIHA         | 3590        |
| CAECIL       | QHIIEEDIADAYPEALVYPFMISSENYSFEDTATGHRNREFMLRIKSKLDKGGMVQDFIQS         | 3593        |
| SNAKE        | QHTVEEIIASSYPQAIIVYPFMISSESFSPETAIIGHKNKEFVKRVKSKLYEGGVIQDFAHS        | 3577        |
| CANARY       | QHTVEEIIANTYPQALVYPFMISSESYCFKDTAAGCKNKEFVERIKNKLDKGGVVDVHVS          | 3582        |
| OSTRICH      | QHTVEEIIANTYPQAIIVYPFMISSESYCFKDTVTVGCKNKEFVERIKKKLDRGGVVDVHVS        | 3552        |
| GECKO        | QYTVEEIIANSYPQAIIVYPFMISSESFQDTIIGHKNKEFVARVSKSLDREGVVDVQVQA          | 3592        |
| TURTLE       | QHTVEEIIANSYPQAIIVYVFLISSENYCFKDTATGHRNKEFVARIKSKLDRGGVIQDFVHA        | 3591        |
| ALLIGATOR    | HHTVEEIIAHNYPQAIIVYPFMISSENYCFKDTATGHRNKEFVTRIKSKLDRGGVIQDFVQA        | 3549        |
| PLATYPUS     | QHTIEEIIADNYPQAIIVYPFMISSENYCFKDTAGHRNKEFVTRIKSKLDRGGVVDVFIQA         | 3581        |
| TASDEVIL     | QHTVAEIIADNYPQAIIVYPFMISSENYCFKDTAGHKKKEFVLRISKSLDQGGVVDVFIQA         | 3586        |
| <b>HUMAN</b> | <b>QHSVEEITDNYPQAIIVYVFFIISSESYCFKDTSTGHKNKEFVARIKSKLDQGGVIQDFINA</b> | <b>3574</b> |
| MOUSE        | QHTVEEIIADNYPQAIIVYVFFIISSESYCFKNTSSGHNNKAFVERIKSKLDHGEVIHVSFINA      | 3574        |

**FAT**

|              |                                                                      |             |
|--------------|----------------------------------------------------------------------|-------------|
| DANIO        | LQQLSNPEMLFKDWWEVKNQLDKPNLDKKKMKLQY--MTELLGDAKSPRFGSYRRKFIQ          | 3627        |
| MILII        | LEQLSNPDMLFKDWVDNFRSKLEKKE-NKTQLKNLYSEMYSNLANAGAPGIGAFRRRFVT         | 3651        |
| BAMBOO       | LEQFSNPDLLFKDWANDFKTELEKPKVKDKLLKNMDEMYSNLASLQFPGIGAFRRRYVQ          | 3642        |
| XENOPUS      | LEQLSNPPMIFQDWWEDVSNELSKPNVNKNKIKELYKEMYTNLGNPKDHFMGAFRRRFCE         | 3651        |
| STERLET      | LQQLTNPEMLFKDWVEDVKKLEKPKTKDKLLKNMDEMYALGNPRCQGIGAFRRKFAQ            | 3656        |
| GAR          | LQQLSNPEMLFKDWLEDARNTLSKPKTKDKDAKKMYEEIISVLGNAKAAGIGRFRRKFFVE        | 3653        |
| LATIMERIA    | LEQLTNSDMIQDWWEDVVDVSNELDKPQRNKANLKRMYEEMYANLGNLRAPGLGFSRNFVK        | 3650        |
| CAECIL       | LEQLSNPDMIQDWWEDVVDVSNELAKSQRNKNKIKKLYEEMYNLGNLKPAPGIGEFRRRFVQ       | 3653        |
| SNAKE        | LEQLSNPAMLFKDWIGDVQNELGKTKKNTNNIQQLYDGMVQNLGNLEAPGLGWYRKFQIK         | 3637        |
| CANARY       | LEQLSNPVMIQDWWEDVVDVSNELSKPQRNKKKLEMYERYMKNLGNLESPGLGMMRRRFIQ        | 3642        |
| OSTRICH      | LEQLSNPMMLFKDWTEVDVSNELVKTQRNKNKLDQDMYERMYRNLGNLEAPGLGLLRRRFIQ       | 3612        |
| GECKO        | LEQLSNPVMLFKDWTDDMKNELGKTKRKNENILKLYDGMVQNLGNVHASGLGLFRKRFIE         | 3652        |
| TURTLE       | LEQLSNPVMLFKDWVEDVKNELGKTKQRNKNKLEMYEGMYRNLGDLQAPGLGLFRKRFVQ         | 3651        |
| ALLIGATOR    | LEQLSNPEMLFKDWVDAVRNELGKAQKNKAKLKEMYEGMYGNLGNLQASGLGLFRRRFIQ         | 3609        |
| PLATYPUS     | LEQLSNPEMLFKDWVEDIKIELTKTPINKNNLKRMYEGMYKTLGNLKPAPGLGAFRRRFIQ        | 3641        |
| TASDEVIL     | LEQLSNPELLFKDWVDDVRGILMQTPVNKKKLEKMYEEMYAILGTLVPGIGAFRRKFIQ          | 3646        |
| <b>HUMAN</b> | <b>LDQLSNPELLFKDWSNDVRAELAKTPVNKKKIEKMYERYMAYALGDPKAPGLGAFRRKFIQ</b> | <b>3634</b> |
| MOUSE        | LDQLSNPDLLFKDWVSDTKDELGKNPVNKKKIEKLYERYMAYALGDLRAPGLGPFRRRFIQ        | 3634        |

**FAT** **KINASE**



Supplementary Figure 1. DNA-PKcs, jawed vertebrates

|              |                                                                       |                 |             |
|--------------|-----------------------------------------------------------------------|-----------------|-------------|
| DANIO        | KFSKEVE---KLLGAGGSKLYERKDKDFLQQVDRMVQSM-----RGFQKE                    | <b>PGNMKEYS</b> | 3678        |
| MILII        | GFKKKID---QHF <del>G</del> KDGLLLNLMN-LKAFNVAVGQIMET-----QKPEP        | <b>PGNLKEYS</b> | 3699        |
| BAMBOO       | VFKAFD---QYYGKEGSRLLDMN- <del>IK</del> IFDEATKKILETV-----CKKQQAP      | <b>PGNLKEYS</b> | 3693        |
| XENOPUS      | KYTKDFD---KAFGPEGSKLLNIK- <del>CD</del> GFNKTVGPLITKM-----KEQQKE      | <b>PGNLKEYS</b> | 3701        |
| STERLET      | HFSKEFD---KTFGKGGAKLFDMK-HDAFRKASDSLWGSISEE---QKKEKE                  | <b>PGNLKEYS</b> | 3709        |
| GAR          | TYAKRIEEIVKELGKDGSKLWDKR-KD-----EKF <del>W</del> QKLTTSIRSMDSIAL      | <b>PGNLKEYS</b> | 3706        |
| LATIMERIA    | AYGKEFE---RVYGKRGSKLLDMK-SSDFFKVSDQLLTSM-----RKQRE                    | <b>PGNLKEYS</b> | 3700        |
| CAECIL       | AHAKDLLD---THFGKGGSKLVDMK-EDAFKATAYSLFNNM-----RGSQPE                  | <b>PGNLKEYS</b> | 3703        |
| SNAKE        | EFGKELD---IHF <del>G</del> KGGSKLLGMN-ASVFIKVANSLSEKM-----KKCEKE      | <b>PGNLKEYS</b> | 3687        |
| CANARY       | AFGKDLLD---HHFGRGGSELLNMK-TSDFDAIANS <del>L</del> HSKM-----IKTHKE     | <b>PGNLKEYS</b> | 3692        |
| OSTRICH      | AFGKDFD---HQFGKRGSKLLNMK-ASDFDAITSALLSKM-----TKSHKE                   | <b>PGNLKEYS</b> | 3662        |
| GECKO        | KFGKEFD---SHFGKRGSKLLDMK-ASGFNTIADSLLLKM-----KECHQE                   | <b>PGNLKEYS</b> | 3702        |
| TURTLE       | TFGKDFS---SHFGKGGSKLLDMK-ADDFNRIAFSLLSKM-----KD-QKE                   | <b>PGNLKEYS</b> | 3700        |
| ALLIGATOR    | AYGKEFD---TQFGKGGSKLLDMK-DNEFIKIVNALLAKM-----RDGQKE                   | <b>PGNLKEYS</b> | 3659        |
| PLATYPUS     | AFGNEFD---HHFGKGGSKLLQMK-LSDFTSITNSLNSKM-----KESKPP                   | <b>PGNLKEYS</b> | 3691        |
| TASDEVIL     | TYGKEFD---RHF <del>G</del> KRGSKLLVMK-LSDFNNTTTLLNKM-----REDSKP       | <b>PGNLKEYS</b> | 3696        |
| <b>HUMAN</b> | <b>TFGKEFD---KHFGKGGSKLLRMK-LSDFN<del>DI</del>TNMLLLKM-----NKDSKP</b> | <b>PGNLKEYS</b> | <b>3684</b> |
| MOUSE        | AFGKEFV---KSF <del>G</del> NGGSKLLTMK-VDDFCKITGSLLVRM-----KKDSKL      | <b>PGNLKEYS</b> | 3684        |

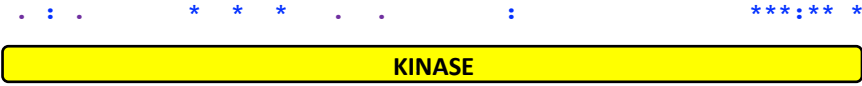

|              |                                                                                                                 |             |
|--------------|-----------------------------------------------------------------------------------------------------------------|-------------|
| DANIO        | PWLS <del>S</del> FKAETLKNEL <del>E</del> VP <del>G</del> QYD <del>G</del> SKPLPEYHAKITGFDERVKVMTSIRRPKRIIIRGDD | 3738        |
| MILII        | PWMSNFKPQFLGNELEIPGQYD <del>G</del> KCKPLPEYHAKITGFDERVKVMSIRKPKRLIIRGND                                        | 3759        |
| BAMBOO       | PWMSEFKPEYLRN <del>D</del> LEIPGQYD <del>G</del> SKKPMPEYHAQITGFDERIKVMSIRKPKRLIIRGND                           | 3753        |
| XENOPUS      | PWMS <del>E</del> FKPEFLRNELEIPGQYD <del>G</del> SKKPMPEYHVKISGFDERVSVMASIRKPKRIIVRGND                          | 3761        |
| STERLET      | PWMSNFKPEVLRN <del>E</del> LEIPGQYD <del>G</del> KCKPLPEYHARITGFDERIKVMSMRKPKRLIMRGND                           | 3769        |
| GAR          | SWLSNFRPETLRNELEVP <del>G</del> QYD <del>G</del> RSKPLPEYHVKITGFDERVQSLRSIRKPKRLIIRGSD                          | 3766        |
| LATIMERIA    | PWMSQFKPEFLRNELEIPGQYD <del>G</del> SKKPMPEYHAKITGFDERIKVMASIRKPKRLIIQND                                        | 3760        |
| CAECIL       | PWMSNFKPEFLRHELEIPGQYD <del>G</del> SKKPLPEYHVKISGFNERVKVMSIRKPKRIIILGND                                        | 3763        |
| SNAKE        | PWMS <del>E</del> FKPEFLRTELEIPGQYD <del>G</del> KKPLPEYHAKISGFDERIKVMQSMR <del>K</del> PKRIVIRGND              | 3747        |
| CANARY       | PWMS <del>E</del> FKAEFLRSELEVP <del>G</del> QYD <del>G</del> KKPLPEYHAKISGFDERISVMSLRKPKRITIRGSD               | 3752        |
| OSTRICH      | PWMS <del>E</del> FKAEFLRNEIEVP <del>G</del> QYD <del>G</del> KKPLPEYHVRISGFDERIKVMESMRKPKRITIRGSD              | 3722        |
| GECKO        | PWMS <del>E</del> FKPEFLKHELEIPGQYD <del>G</del> KKPLPEYHAKIAGFDERIKVMSIRKPKRIIIRGSD                            | 3762        |
| TURTLE       | PWMSDFKA <del>E</del> FMRNELEIPGQYD <del>G</del> SKKPLPEYHAKISGFDERIKVMESIRKPKRINIRGSD                          | 3760        |
| ALLIGATOR    | PWLS <del>E</del> FKAEFWRNELEIPGQYD <del>G</del> KKPLPEYHAKISGFDERIKVMESLRKPKRIIIRGSD                           | 3719        |
| PLATYPUS     | PWLSDFRVEFLRSELEIPGQYD <del>G</del> KKPLPEYHAKITGFDERVKVMASIRKPKRIIRGHD                                         | 3751        |
| TASDEVIL     | PWMSNFKVEFLRNELEVP <del>G</del> QYD <del>G</del> RGKPLPEYHAKITGFDERVKVMASIRKPKRITIRGND                          | 3756        |
| <b>HUMAN</b> | <b>PWMSDFKVEFLRNELEIPGQYD<del>G</del>RGKPLPEYHVR<del>I</del>AGFDERVTVMASLR<del>R</del>PKRIIIRGHD</b>            | <b>3744</b> |
| MOUSE        | PWMS <del>E</del> FKAQFLKNELEIPGQYD <del>G</del> SKKPLPEYHVRISGFDERVKVMSLRKPKRIVIRGHD                           | 3744        |

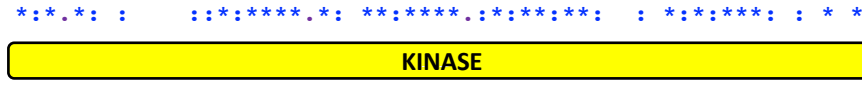

Supplementary Figure 1. DNA-PKcs, jawed vertebrates

|              |                                                                        |             |
|--------------|------------------------------------------------------------------------|-------------|
| DANIO        | ERDYPFLVKGGEDLRQDQRIEQLFQVGMN MILS QDTACSQRSLALR TYQVIPITSRIGLIE       | 3798        |
| MILII        | EKEYPFLVKGGEDLRQDQRIEQLFQVGMN ILSRDAACSQRSLQLKTYQVIPM TSRLGLIE         | 3819        |
| BAMBOO       | EKEYPFLVKGGEDLRQDQRIEQLFQVGMN ILSRDAACSQRNLQLKTYQVIPM TSRLGLIE         | 3813        |
| XENOPUS      | EREYPFLVKGGEDLRQDQRIEQLFQVGMN ILSQDAACSQRHMLKTYQVIPM TRIGLIE           | 3821        |
| STERLET      | EREYPFLVKGGEDLRQDQRIEQLFQVGMN ILSR DATCSQRNLQLKTYQVIPM TARIGLIE        | 3829        |
| GAR          | ERDYPFLVKGGEDLRQDQRIEQLFQVGMN ILSQDAACSQRNLGLR TYQVIPM TRIGLIE         | 3826        |
| LATIMERIA    | EREHPFLVKGGEDLRQDQRIEQLFQVGMN ILSQDAACSQRNLQLKTYQVIPM TRIGLIE          | 3820        |
| CAECIL       | EKEYPFLVKGGEDLRQDQRIEQLFQVGMN ILSQDAACSQRNMQIKTYQVIPM TRIGLIE          | 3823        |
| SNAKE        | EREYPFLVKGGEDLRQDQRIEQLFQVGMN ILSRDAACSQRNMQIKTYQVIPM TRIGLIE          | 3807        |
| CANARY       | EREYPFLVKGGEDLRQDQRIEQLFQVGMN ILSQDATCSQRNMQLKTYQVIPM TRIGLIE          | 3812        |
| OSTRICH      | EQEYPFLVKGGEDLRQDQRIEQLFQVGMN ILSQDAACSQRNMQLKTYQVIPM TRIGLIE          | 3782        |
| GECKO        | EREYPFLVKGGEDLRQDQRIEQLFQVGMN TVLLQDAACSQRSMQLKTYQVIPM TRIGLIE         | 3822        |
| TURTLE       | EREHPFLVKGGEDLRQDQRIEELFDVMN ILSQDAACSQRNMQIKTYQVIPM TRIGLIE           | 3820        |
| ALLIGATOR    | EREYPFLVKGGEDLRQDQRIEQLFQVGMN ILSQDASCSQRNMQIKTYQVIPM TRIGLIE          | 3779        |
| PLATYPUS     | EREYPFLVKGGEDLRQDQRIEQLLDIMN ILSQDAACSQRNMQLKTYQVIPM TRIGLIE           | 3811        |
| TASDEVIL     | EKEYPFLVKGGEDLRQDQRIEQLFQVGMN ILSQDAACSQRNMQLKTYHVIPM TRIGLIE          | 3816        |
| <b>HUMAN</b> | <b>EREHPFLVKGGEDLRQDQRIEQLFQVGMN ILSQDAACSQRALQLR TYSVVPM TSRLGLIE</b> | <b>3804</b> |
| MOUSE        | EKEYPFLVKGGEDLRQDQRIEQIFQVGMN AILSQDAACSQRNMQLR TYRVPM TSRLGLIE        | 3804        |

**KINASE**

|              |                                                                      |             |
|--------------|----------------------------------------------------------------------|-------------|
| DANIO        | WMEN TCTLKDFLSSRRTEQE QKT-----ITRPNEFYDEWISKVAG-KVEGIRRYAELYK        | 3851        |
| MILII        | WLDN TCTLKDFLSSNITEETQSR RQ-----QEVLPKYREWLQK MAGRK-DMFLRYPTMYL      | 3873        |
| BAMBOO       | WLDN TCVVKDFLLSNMTEDEHKRPS-----P--KELFSEWLQRISGSKSDVT TLYGQMYM       | 3866        |
| XENOPUS      | WLEN TCTLKEFILNTMTEDEAKIYNSKT-TNGPLYHYNAWLDKKEK--VGDARQHVTSYT        | 3878        |
| STERLET      | WLEN TCTLKEFLFDRMTEEERKH-----CKRPAESYMEWL SKVAG-KEKGIAQYITMYK        | 3882        |
| GAR          | WLEN TCTLKDFLDSRRTEPEEK S-----SPSPQDMYSAWLEKISR-RSKGQE QYHEVYK       | 3879        |
| LATIMERIA    | WLEN TCTLKEFLSNAMTEEERTNYETLSPKKGPKAQYNEWLTKMAGG-SVGPQR YGSMYK       | 3879        |
| CAECIL       | WLEA NTTLKDFLYNSMSEAEQENCS--S-T---TKHYKDWIQMGR--CDNISRYEYMYR         | 3875        |
| SNAKE        | WLEN TYTLKEFL LKNMSEQEKN CYN--S-SQGPFADYKDWLCKMGE--RNRIECYMTMFK      | 3862        |
| CANARY       | WLEN TCTLKEFLKNSMSEEDINYY--S-PRGPRATYSEWLSRMGG-KAQGISRYHAM YR        | 3868        |
| OSTRICH      | WLEN TCTLKEFLKNSMSEEDFNYS--S-KKGPRATYNEWLSKMGG-KAQGVPRYHV MYR        | 3838        |
| GECKO        | WLGN TCTLKEFL LQNMSEQEKN DYN--S-SKGPRADYNEWLSKMGD-RNAGLVN YVSMYK     | 3878        |
| TURTLE       | WLEN TCTLKNFLMESMSEEEKD DYH--S-RKGPRIMYSDWLSKMAGK-ENGIARYK TMYK      | 3876        |
| ALLIGATOR    | WLPN TCTLKNFLHSNMSEEEKADY C--S-EKGPLFAYNEWLSKMAGGKIEDFARYM PMYK      | 3836        |
| PLATYPUS     | WLEN TCTLKEFLILKSMSEGEKAA YE--SNPKGPVHEYSEWLYKMSK--KQDFGAYMLMYK      | 3867        |
| TASDEVIL     | WLEN TCTLKEFL LNNMSEEEKAA YE--SGPKAPQLEYSTWLT KITG--KQDISAYMLMYR     | 3872        |
| <b>HUMAN</b> | <b>WLEN TVTLKDLLNTMSQEEKAA YL--SDPRAPPCEYKDWLTKMSG--KHDVGAYMLMYK</b> | <b>3860</b> |
| MOUSE        | WLEN TMLKDLLSNMSQEEKVANN--SDPKAPIRDYKDWLKVSG--KSDAGAYVLM YS          | 3860        |

**KINASE**

Supplementary Figure 1. DNA-PKcs, jawed vertebrates

|              |                                                                                                           |             |
|--------------|-----------------------------------------------------------------------------------------------------------|-------------|
| DANIO        | KAKRVDTVNNFRRIEQMVPD <b>LLKRAF</b> VRMSTT <b>PEAF</b> LSLRSHFSSSHAVLCISHWILGI                             | 3911        |
| MILII        | KASRTETVTA <b>FR</b> THEQAI <b>PGDLLRRAF</b> IKMSTT <b>PEAF</b> LALRSHFASSHALMCISHWILGI                   | 3933        |
| BAMBOO       | KASRTETVKA <b>FR</b> Q <b>CE</b> RAVPP <b>DLLRRAF</b> TKMSTT <b>PEAF</b> LALRSHFASSHALMCVSHWILGI          | 3926        |
| XENOPUS      | RCDRTNTVAS <b>FR</b> ER <b>EAL</b> VP <b>DKLLRRAF</b> VKMSTT <b>PEAF</b> LSLRSHFARSHALLCVSHWIVGI          | 3938        |
| STERLET      | TAKRTETVRA <b>FR</b> N <b>VE</b> HHV <b>PEDLLRRAF</b> MKMSTT <b>PEAF</b> LSLRSHFTCSHALMCVSHWILGI          | 3942        |
| GAR          | KASRTETVAN <b>FQ</b> SI <b>EKL</b> VP <b>QDLLRRAF</b> IQLSTT <b>PE</b> SFLSLRSHF <b>ASTHAL</b> ICVSHWILGI | 3939        |
| LATIMERIA    | RASRTETVMA <b>FR</b> SV <b>ESL</b> VR <b>DLLRRAF</b> TKMSTT <b>PEAF</b> LTLRSHFASSHALMCISHWILGI           | 3939        |
| CAECIL       | RASYTETVVA <b>FK</b> AREN <b>LVPGDLLRRAF</b> TKMSTT <b>PEAF</b> LTLRSHFASSHALMCISHWILGI                   | 3935        |
| SNAKE        | RASRTETVMS <b>FQ</b> HREN <b>RVPEDLLRKAF</b> VKMSTT <b>PEALL</b> SLRSHF <b>ASTHAL</b> ICISHWILGI          | 3922        |
| CANARY       | NASRTEAVTS <b>FK</b> SRESS <b>VPEDLLRRAF</b> VKMSTT <b>PEAF</b> LALRSHFASSHALMCISHWILGI                   | 3928        |
| OSTRICH      | NANRTEVMS <b>FK</b> SRESS <b>VPEDLLRRAF</b> VKMST <b>PEAF</b> LSLRSHFASSHALMCISHWILGI                     | 3898        |
| GECKO        | KASRIETVTS <b>FQ</b> QREN <b>LVPEDLLRRAF</b> VKMSTT <b>PEAF</b> LSLRSHFASSHALMCISHWILGI                   | 3938        |
| TURTLE       | RANRTEVLS <b>FR</b> NRETS <b>VPD</b> LLRRAFV <b>KMST</b> PEAFLSLRSHFASSHALMCISHWILGI                      | 3936        |
| ALLIGATOR    | RASRTETVMS <b>FR</b> NREN <b>RVPEDLLRRAF</b> VKMST <b>PEAF</b> LSLRSHFTSSHALICISHWILGI                    | 3896        |
| PLATYPUS     | HASRTEAVTA <b>FR</b> NREN <b>RVPGDLLRRAF</b> VKMST <b>PEAF</b> LALRSHFARSHALLCVSHWILGI                    | 3927        |
| TASDEVIL     | RANRTEITTS <b>FR</b> NRESK <b>VPADLLRRAF</b> VKMSTT <b>PEAF</b> LALRSHFASSHALMCISHWILGI                   | 3932        |
| <b>HUMAN</b> | <b>G</b> ANRTEVTS <b>FR</b> K <b>RESK</b> VP <b>ADLLKRAF</b> VRMST <b>PEAF</b> LALRSHFASSHALICISHWILGI    | <b>3920</b> |
| MOUSE        | RANRTEVVA <b>FR</b> RES <b>QVPPDLLKRAF</b> VKMST <b>PEAF</b> LALRSHFASSHALMCISHWLLGI                      | 3920        |

**KINASE**

|              |                                                                                       |             |
|--------------|---------------------------------------------------------------------------------------|-------------|
| DANIO        | <b>GDRHLSNFMI</b> NT <b>ETGGMIGIDFGHAFGSA</b> <b>QFLVPPELMPFRLTRQFINLMRPLAESGLI</b>   | 3971        |
| MILII        | <b>GDRHLSNFMV</b> N <b>LETGGMVIGIDFGHAFGSA</b> <b>QFLVPPELMPFRLTRQILNLMMPKESGLI</b>   | 3993        |
| BAMBOO       | <b>GDRHLSNFMIN</b> LET <b>ETGGMVIGIDFGHAFGSA</b> <b>QFLVPPELMPFRLTRHQLNLMMPKESGLI</b> | 3986        |
| XENOPUS      | <b>GDRHLSNFMIN</b> ET <b>ETGGMIGIDFGHAFGTA</b> <b>QFLVPPELMPFRLTRQIVNLMMPKDSGLF</b>   | 3998        |
| STERLET      | <b>GDRHLSNFMIN</b> ET <b>ETGGMVIGIDFGHAFGSA</b> <b>QFLVPPELMPFRLTRQFLNLMMPRESGQI</b>  | 4002        |
| GAR          | <b>GDRHLSNFMV</b> N <b>ETGGMVIGIDFGHAFGSA</b> <b>QFLTVPELMPFRFTRQFLNLMMPGVSGLI</b>    | 3999        |
| LATIMERIA    | <b>GDRHLSNFMIN</b> ET <b>ETGGMVIGIDFGHAFGSA</b> <b>QFLVPPELMPFRLTSQFLNLMMPKEQGLL</b>  | 3999        |
| CAECIL       | <b>GDRHLSNFMIN</b> ET <b>ETGGMVIGIDFGHAFGSA</b> <b>QFLVPPELMPFRLTRQFVQLMMPKESGLI</b>  | 3995        |
| SNAKE        | <b>GDRHLSNFMI</b> ST <b>ETGGLVIGIDFGYAFGSA</b> <b>QFLQPELMPFRLTRQFVNLMMPKESGLM</b>    | 3982        |
| CANARY       | <b>GDRHLSNFMIN</b> K <b>ETGGMVIGIDFGYAFGAA</b> <b>QFLSVPELMPFRLTRQFVNLMMPVKEWGLI</b>  | 3988        |
| OSTRICH      | <b>GDRHLSNFMIN</b> K <b>ETGGMVIGIDFGHAFGSA</b> <b>QFLVPPELMPFRLTRQFVNLMMPVKEWGLI</b>  | 3958        |
| GECKO        | <b>GDRHLSNFMV</b> N <b>ETGGMVIGIDFGHAFGSA</b> <b>QFLVPPELMPFRLTRQFINLMMPKETGLI</b>    | 3998        |
| TURTLE       | <b>GDRHLSNFMIN</b> ET <b>ETGGMVIGIDFGHAFGSA</b> <b>QFLQVPELMPFRLTRQFINLMMPKESGLI</b>  | 3996        |
| ALLIGATOR    | <b>GDRHLSNFMIN</b> ET <b>ETGGIIGIDFGYAFGSA</b> <b>QMLVPPELMPFRLTRQFINLMMPKESGLI</b>   | 3956        |
| PLATYPUS     | <b>GDRHLSNFMIN</b> LET <b>ETGGMVIGIDFGHAFGSA</b> <b>QFLVPPELMPFRLTRQLINLMSPKESGLV</b> | 3987        |
| TASDEVIL     | <b>GDRHLSNFMIN</b> ET <b>ETGGMIGIDFGHAFGSA</b> <b>QFLVPPELMPFRLTRQFINLMMPKETGLI</b>   | 3992        |
| <b>HUMAN</b> | <b>GDRHLN</b> N <b>FVAMETGGVIGIDFGHAFGSA</b> <b>QFLVPPELMPFRLTRQFINLMMPKETGLM</b>     | <b>3980</b> |
| MOUSE        | <b>GDRHLN</b> N <b>FVAMETGSVIGIDFGHAFGSA</b> <b>QFLVPPELMPFRLTRQFVSLMMPKETGLM</b>     | 3980        |

**KINASE**

T3950

Supplementary Figure 1. DNA-PKcs, jawed vertebrates

|              |                     |                 |                   |                        |                         |             |
|--------------|---------------------|-----------------|-------------------|------------------------|-------------------------|-------------|
| DANIO        | QSMVHSLRAFR         | AEPDLLLN        | TMDVVFVKEP        | SLDWKNFELKQLKKG        | GTWTESVNTKEINWFP        | 4031        |
| MILII        | RSIMVHGLRAFR        | LDPDLLLS        | TMDIFVKEP         | SLDWKNLELKQMKKG        | GTWNKDVNTREIHWYP        | 4053        |
| BAMBOO       | YSTMVHGLRAFR        | LDPDLLLN        | TMDVVFVKEP        | SLDWKNFELKQLKKE        | GSWSKDVNINEINWYP        | 4046        |
| XENOPUS      | DSVMVHSLRAYR        | SDPGLLVT        | TMDVFIKEP         | SLDWKNLELKQMKKG        | GEWKAVDVTSHNWHYP        | 4058        |
| STERLET      | YSVMVHSLRAYR        | ADPDLLIN        | TMDVVFVKEP        | SLDWKNFELKQMKK         | AGSWEAVTNEINWYP         | 4062        |
| GAR          | SSVMAHALRAYR        | AEPDLLLN        | TMDVVFVKEP        | SLDWKNFELKQLKKG        | GTWKEVNTKEIDWYP         | 4059        |
| LATIMERIA    | YSVMVHALRAYR        | RANPDLLLN       | TMDVVFVKEP        | SLDWKNFELKQLKKG        | GSWTKEVNTKEVNWYP        | 4059        |
| CAECIL       | ESVMVHALRAYR        | TDPSELLIT       | TMDVVFVKEP        | CLDWNFMFLKQLKKG        | QGTWTKKVNTAEKNWYA       | 4055        |
| SNAKE        | YSVMVHSLRAYR        | INQDVLIN        | TMDIFVKEP         | SLDWKNFELKQLRKG        | GTWKEINTDEVNWYP         | 4042        |
| CANARY       | YSVMVHALRAYR        | SDPDLLIS        | TMDVVFVKEP        | SLDWKNFEQRQLKKG        | GTWIKINTSEVNWYP         | 4048        |
| OSTRICH      | YSVMVHALRAYR        | ADPDLLIS        | TMDVVFVKEP        | SLDWKNFEQRQLKKG        | GTWIQEINTSEVNWYP        | 4018        |
| GECKO        | YSVMVHSLKAYR        | VYPDLLIN        | TMDIFVKEP         | SLDWKNFELKQLKKG        | GTWTKDINMDEVNWYP        | 4058        |
| TURTLE       | YSVMVHSLRAYR        | TEPDLLVS        | TMDVVFVKEP        | SLDWQNFELKQLKKG        | GTWSKEVNTAEINWYP        | 4056        |
| ALLIGATOR    | YSIMTHALRAYR        | KDPDLLIN        | TMDVVFVKEP        | SLDWKNFELRLKKG         | GTWLEKVNTEVNWYP         | 4016        |
| PLATYPUS     | YSVMVHALHAFR        | TDPDLLLN        | TMDVVFVKEP        | SLDWKNFETKMLKRG        | GTWTRAVNTADTNWYP        | 4047        |
| TASDEVIL     | YSVMVHALRAFR        | LDPGLLIS        | TMDVVFVKEP        | SLDWKNFEQKMLKKG        | GSWTREVNMTMNWYP         | 4052        |
| <b>HUMAN</b> | <b>YSIMVHALRAFR</b> | <b>SDPGLLTN</b> | <b>TMDVVFVKEP</b> | <b>SFDWKNFEQKMLKKG</b> | <b>GSWIQEINVAEKNWYP</b> | <b>4040</b> |
| MOUSE        | CTVMVHALRAFR        | SCAGLLTD        | TMEIFVKEP         | SFDWKSFEQTMLRKG        | GSWIQEINVTEKNWYP        | 4040        |

**KINASE**

|              |             |              |           |              |                |           |             |              |             |           |            |             |          |           |          |            |            |          |          |           |             |      |      |      |
|--------------|-------------|--------------|-----------|--------------|----------------|-----------|-------------|--------------|-------------|-----------|------------|-------------|----------|-----------|----------|------------|------------|----------|----------|-----------|-------------|------|------|------|
| DANIO        | LQKVN       | FARRKLE      | GTNP      | SVITSEEL     | CLGF           | EKMP      | EYKGLL      | AVARG        | EEQHN       | I         | RARLADKDL  | TV          | 4091     |           |          |            |            |          |          |           |             |      |      |      |
| MILII        | MQKVR       | YARRKLE      | GANP      | AAITRDEL     | QLGHE          | TTEAY     | KSYVAV      | AMGD         | KEHN        | I         | RARVPEDGL  | SV          | 4113     |           |          |            |            |          |          |           |             |      |      |      |
| BAMBOO       | RQKVN       | YAKR         | LEGANP    | SAITRDEL     | QLGHE          | KSKAY     | ASYVAV      | AMGD         | KDHN        | V         | RARESEGL   | SV          | 4106     |           |          |            |            |          |          |           |             |      |      |      |
| XENOPUS      | QQKI        | HCAKR        | LDGANP    | CEIT         | CEEL           | RLGHE     | SAPEY       | KDFI         | AVARG       | DKKH      | NRRT       | NEPPDGL     | TE       | 4118      |          |            |            |          |          |           |             |      |      |      |
| STERLET      | MQKVN       | FARRKLE      | GANP      | AVITSEEL     | KLGF           | EKSPAY    | QSII        | AVAQ         | GEKEHN      | V         | RAREAPQGL  | SV          | 4122     |           |          |            |            |          |          |           |             |      |      |      |
| GAR          | RQKV        | QFAQR        | LEGANP    | AAITSEEL     | KLGF           | EKESWC    | RAAAL       | AMAQ         | GEQGN       | V         | RASQA      | AEG         | LAV      | 4119      |          |            |            |          |          |           |             |      |      |      |
| LATIMERIA    | VQKV        | KCGR         | QLE       | GVNPI        | TCNEL          | QLGHE     | KLSAY       | QSYL         | AVVKG       | DPDH      | N          | VRA         | REV      | KEDLPV    | 4119     |            |            |          |          |           |             |      |      |      |
| CAECIL       | VQKVN       | CARRK        | L         | GTNP         | AITCDE         | LE        | LGHE        | KSVAY        | KEMK        | AV        | AMGDK      | THN         | V        | RAREPKDGL | TE       | 4115       |            |          |          |           |             |      |      |      |
| SNAKE        | LQKV        | KIARRK       | L         | AGANP        | AVITCDE        | LR        | LGHE        | KSEAF        | REYV        | S         | V          | AQ          | SKQFN    | I         | RARQ     | PQDGL      | AE         | 4102     |          |           |             |      |      |      |
| CANARY       | LQKVN       | YVRRK        | L         | TGANP        | AITCDE         | LR        | LGHE        | KSPAY        | NDF         | A         | V          | ARGNS       | NHDI     | R         | A        | KEP        | DGL        | SE       | 4108     |           |             |      |      |      |
| OSTRICH      | LQKV        | SYV          | KRKL      | TGNP         | GRITCDE        | LR        | LGHE        | KSPFF        | SDFV        | AV        | ARG        | NAAHN       | T        | R         | A        | KEP        | DGL        | SE       | 4078     |           |             |      |      |      |
| GECKO        | LQKVN       | FARRK        | L         | AGANP        | AVITSEEL       | RL        | LGHE        | KSSAY        | RYV         | S         | V          | ARG         | SKEHN    | I         | R        | A          | KEA        | DGL      | SE       | 4118      |             |      |      |      |
| TURTLE       | LQKVN       | CAKR         | KL        | AGANP        | AVLTCDE        | LR        | LGHE        | KSPAY        | KEYV        | AV        | AQ         | SRDH        | N        | R         | A        | KEP        | DGL        | SE       | 4116     |           |             |      |      |      |
| ALLIGATOR    | LQKVN       | CV           | KRKL      | AGSNP        | AAITCDE        | LR        | LGHE        | KSLAY        | RDYV        | AV        | ARG        | TRDQ        | N        | R         | A        | KEP        | DGL        | TE       | 4076     |           |             |      |      |      |
| PLATYPUS     | LQKI        | SYAKR        | KL        | TGNP         | AITCDE         | LR        | LGHE        | KVPA         | FGDY        | I         | S          | V           | ARG      | SKDH      | N        | V          | R          | A        | RQPE     | EGL       | SE          | 4107 |      |      |
| TASDEVIL     | LQKIN       | YAKR         | KL        | AGANP        | AAITCDE        | LR        | LGHE        | KVPA         | FE          | CV        | S          | V           | AQ       | GNR       | DH       | N          | F          | R        | A        | QQP       | DDGL        | SE   | 4112 |      |
| <b>HUMAN</b> | <b>ROKI</b> | <b>CYAKR</b> | <b>KL</b> | <b>AGANP</b> | <b>AVITCDE</b> | <b>LL</b> | <b>LGHE</b> | <b>KAPAF</b> | <b>RDYV</b> | <b>AV</b> | <b>ARG</b> | <b>SKDH</b> | <b>N</b> | <b>R</b>  | <b>A</b> | <b>QEP</b> | <b>PES</b> | <b>G</b> | <b>L</b> | <b>SE</b> | <b>4100</b> |      |      |      |
| MOUSE        | QHKIR       | YAKR         | KL        | AGANP        | AVITCDE        | LY        | LGHE        | A            | SSAF        | RSY       | T          | AV          | ARG      | NR        | DY       | N          | R          | A        | QEP      | PES       | G           | L    | SE   | 4100 |

**KINASE**

Supplementary Figure 1. DNA-PKcs, jawed vertebrates

|              |                                     |             |
|--------------|-------------------------------------|-------------|
| DANIO        | EDQVDCLLDQATDPNILGRVWIGWEPWI        | 4119        |
| MILII        | EIQVDCLIDQATDPNILGRVWEGWEPWM        | 4141        |
| BAMBOO       | ECQVDCLIDQATDPNILGRVWIGWEAWM        | 4134        |
| XENOPUS      | ETQVQCLIDQATDPNILGRVWKGWEPWI        | 4146        |
| STERLET      | ETQVECLIDQATDPNILGRVWVGWESWV        | 4150        |
| GAR          | EIQVECLLDQATDPNILGRVVMGWEPWI        | 4147        |
| LATIMERIA    | ETQVACLIDQATDPNILGRVWEGWEPWM        | 4147        |
| CAECIL       | EIQVKCLLDQATDPNILGRVWEGWEPWM        | 4143        |
| SNAKE        | EIQVKCLIDQATDPNILGRVWEGWEPWM        | 4130        |
| CANARY       | ETQVRCLIDQATDPNILGRVWEGWEPWM        | 4136        |
| OSTRICH      | ETQVKCLIDQATDPNILGRAWEGWEPWM        | 4106        |
| GECKO        | EIQVKCLIDQATDSNILGRVWEGWEPWM        | 4146        |
| TURTLE       | EIQVRCLLDQATDPNILGRVWEGWEPWM        | 4144        |
| ALLIGATOR    | ETQVKCLIDQATDPNILGRVWAGWESWM        | 4104        |
| PLATYPUS     | EQQVQCLIDQATDPNILGRVWIGWEPWM        | 4135        |
| TASDEVIL     | ETQVKCLMDQATDPNVLGRVWIGWEPWM        | 4140        |
| <b>HUMAN</b> | <b>ETQVKCLMDQATDPNILGRVWEGWEPWM</b> | <b>4128</b> |
| MOUSE        | ETQVKCLVDQATDPNILGRVWEGWEPWM        | 4128        |

\* \* \* \*:\*\*\*\*\* \*:\*\*\*.: \*\*\* \*:  
FATC

**Reference Supplementary Figure 1.**

1. **Sievers F, Wilm A, Dineen D, Gibson TJ, Karplus K, Li W, Lopez R, McWilliam H, Remmert M, Soding J, Thompson JD, Higgins DG. 2011. Fast, scalable generation of high-quality protein multiple sequence alignments using Clustal Omega. Mol Syst Biol 7:539.**
