# Supplementary material for: Uncovering DNA-PKcs ancient phylogeny, unique sequence motifs and insights for human disease
Source: PubMed Central journal article supplement — Prog Biophys Mol Biol. Author manuscript; Available in PMC 2022 Aug 1. (PMC8021618; doi:10.1016/j.pbiomolbio.2020.09.010), 2020-10-06
Supplement: NIHMS1638735-supplement-4.pdf [file NIHMS1638735-supplement-4.pdf]

Supplementary Figure 3: DNA-PKcs COBALT Metazoa Vertebrate Invertebrate

**Supplementary Figure 3.** Results of COBALT alignment of DNA-PKcs sequences from selected vertebrate and invertebrate species. DNA-PKcs amino acid sequences from the organisms listed below were analyzed by COBALT using the default settings (conservation setting 2). For additional information on sequences and phyla please see Supplementary Table 1. For graphical image, please see Figure 4A.

|             |     |    |                                                                                 |     |
|-------------|-----|----|---------------------------------------------------------------------------------|-----|
| TERMITE     | 1   | MM | GSELI---GFVEVINSICISGNHLNKYIEAKSNISNIISYfeDKRRKRTDLG---AFTVLFDDKKTGILQFIQKALK   | 71  |
| SHRIMP      | 1   | MA | [5]EELDL---LLGKLSQSPGPNQGDDPAADKVIDIAELL--AVDLTPAQY-DLYISQVLG-EKGIITFGRSVSK     | 74  |
| SCORPION    | 1   | MN | [1]ITNSL-HENILKLNDFIKY--QKDEGHSSIVIKDISEI--CLRGLTSEKDrSYVCSLILRKEDGFLHFLAEAVN   | 73  |
| ALVINELLA   | 1   | ME | -----NLGCC-----CALLFSKETGITNFKKKVQ                                              | 27  |
| CAPITELLA   | 1   | MA | --RAL-QEQLAGLVSDTRGQPGVNVARISHESIGNIGAI--CLNDVNASDV-DLAYSVIFNHETGLIKFLKKIQQ     | 71  |
| SPONGE      | 1   | ME | -----SRIEHLWESLHSSSPQRYSY-AVEVASDLYSL--CVEQITESEL-AYSSSVLFPNDGILKFLHDVVT        | 66  |
| OYSTER      | 1   | MA | AS---LLEDNLRSLN-ECLTTADNSSKQADSIIVADISQI--CINESTDKDI-DLCCSVLFDKRRGLVFLSETVT     | 71  |
| SNAIL       | 1   | MA | AT---L-EETLRSLH-D---QSGASAYNLANGLIADIRQI--CLHEISEKDR-DYCCSALFDKDIIGLIAFLQKVA    | 67  |
| TRICHOPLAX  | 1   | MA | --SNL-SQLLIDLHALLNL-QSLHRGSNACDIASDIIVL--CLQTASDAEK-AYCSALFSGQYGVVTFLRKSLG      | 70  |
| SEA_ANEMONE | 1   | MT | --DAI--SSRLQLNELVAE-ESPLRQGESABIARDLRAH--CSQLRDESELGARCSSLILFDKDTGIIRFLHKTIA    | 71  |
| PRIPAPULA   | 1   | MA | RTVRI-EDHVQTLLESLPSDDREADPETAHSAVADLAHK--CLQDISKRDV-DLTCVSLFSEDRGVLIFLRRRAIP    | 73  |
| ESHARK      | 1   | MA | [4]AAADT-LSAFSKLHLLSLSDVKSAAAEHSASVGSISRDrCS-SSSDSQL-ALQSSMVFSKDTGLLVFLRKSRLR   | 78  |
| STERLET     | 1   | MA | [7]GAGGI-QGNLHKLHSFLNADAKSAAVESHNLIGNLQGE--CMVSKNENEL-VLQTSLIFSKENGLLAFVRKSLN   | 80  |
| COELACANTH  | 1   | MA | [7]AVEGV-SGYLLKIHSSLTVDTKSAAEISNIFGNLRQE--CLVTSDENEL-ALHISLIFSKETGILLIFLRKSLG   | 80  |
| HUMAN       | 1   | MA | [1]SGAGV-RCSSLRLQETLSAADRCGAALAGHQLIRGLQGE--CVLSSSPAVL-ALQTSLVFSRDFGLLVFVRKSLN  | 74  |
| CAECILIAN   | 1   | MS | [7]SAVGV-QGSLRLHSLSSKDPGLEAPVAQSLIRSLGEE--CVTSSGDSVL-ALQTSLIFSKHEGLLAFIHKSLG    | 80  |
| PLATYPUS    | 1   | MA | [4]---GP-QGSLRLRQFLAEADAGVSAVAAYQILRGLQGE--CVLSAGPAVQ-ALHSTLVFSEKFGPLVPIRKSRLR  | 74  |
| CANARY      | 1   | MA | ---GV-QQCLLQLHRCLQPGDAGGSALHGYSLLRSLAET--CLASLASGEQ-ALHLSLVFSQYGLLVFIRHSLT      | 70  |
| OSTRICH     | 1   | MC | ---SE-R-----KDVQAD--CVFALPA---ALHISLVFSQYGLLVFIRHSLG                            | 41  |
| TURTLE      | 1   | MA | [6]GGGGI-QGSLHLQSCALQDPDPGTAALRGYHLIRGVGEA--CVTSTGDCGAR-ALQTSLVFSKDNGLLVFVRKSLN | 79  |
| ALLIGATOR   | 1   | MA | [5]-----VIRTGDSAQ-ALQSSLVFSKDNGLLVFIRKSLN                                       | 39  |
| SOFTCORAL   | 1   | MT | --EVI-DRYLNQLNSCLKT-LSSSRGREAADICRDLRLY--CIENINETQL-AYCSLFLNQDGLLITFVKAIVQ      | 70  |
| STONYCORAL  | 1   | MS | --DLL-NRYLPHLHSLPDL-DAPHCHGLDASNTVVDLGSF--CLENVSSSEQ-AYSSLFLSGETSIVSFLRKKVIT    | 70  |
| ACORN_WORM  | 1   | MP | SS-EL-QSKLAELELLEDETPSQHTVEKCNLIGEIQLI--CLRTTSENEL-AYHCSVVFHKTGILLFLKKTIT       | 72  |
| LANCELET    | 1   | MA | GSGL-EARLSELHALLESDHGHGAVEAHLNVDIAQI--CLRHTAERDV-AYCSVLFQESTGITAFLRKTVT         | 73  |
| SEA_URCHIN  | 1   | MA | AA-EL-QRHLAELHEVIDSGGTAHPETAQDLVVDIAQL--CLNQIRENEL-AFCRSSELPQKGTGITIFLQKAVS     | 72  |
| STARFISH    | 1   | MA | TA-DL-PVKLSELNGLISTKSGLHVAKAQLLVLDLGHLL--CLRQISENEL-AYCSQFLNKDNGLLVFLNKAIP      | 72  |
| TERMITE     | 72  |    | QDAFTEAIKESFVLLKQLIDVFKERMSC                                                    | 144 |
| SHRIMP      | 75  |    | DQSFVEAKKSTLDVLTLLDKEAQKINK                                                     | 150 |
| SCORPION    | 74  |    | TPSLKDSLIEALQFLNLFNIGNKVVQ                                                      | 149 |
| ALVINELLA   | 28  |    | KDEFDLCKVDALKMMLALVVKYDKLLS                                                     | 103 |
| CAPITELLA   | 72  |    | NDEFEGCKCELELLKTFISKPPGVHP                                                      | 147 |
| SPONGE      | 67  |    | LEEFASCKEELKLLSNFVKNLSRRVLS                                                     | 142 |
| OYSTER      | 72  |    | KEEFQTCQKLELFLSEFVQRIGKKIIP                                                     | 147 |
| SNAIL       | 68  |    | KDEFQSTKTNLLDIFGDFLQKVGKLLP                                                     | 143 |
| TRICHOPLAX  | 71  |    | LDDLDKREDLLKLIATYMEKIGGKISP                                                     | 146 |
| SEA_ANEMONE | 72  |    | NQEFVECKTELKFLQSYLQGLNTRVNP                                                     | 147 |
| PRIPAPULA   | 74  |    | LDEFKLAKEELKQLLHSHFNKQGRILT                                                     | 149 |
| ESHARK      | 79  |    | FEFPRDSRELVKLLSEVVERIGEAVGR                                                     | 154 |
| STERLET     | 81  |    | IEDFRDREELKLLTFLDRIAHKVN[4]                                                     | 159 |
| COELACANTH  | 81  |    | SEFPRDNEELKFLFAVFKIGQKLN                                                        | 151 |
| HUMAN       | 75  |    | SIEFRECREEILKFLCIFLEKMGQKIAP                                                    | 150 |
| CAECILIAN   | 81  |    | IEEFPRDREELKFLCIFLEKMGQKIVP                                                     | 156 |
| PLATYPUS    | 75  |    | IEEFPRDREELKFLCIFLEKMGQKIEP                                                     | 150 |
| CANARY      | 71  |    | IEEFPRDREELKFLCFMEKVGDKIHP                                                      | 146 |
| OSTRICH     | 42  |    | IEEFPRDREELKFLCFMEKVGDKIHP                                                      | 117 |
| TURTLE      | 80  |    | MEEFPRDREELKFLCFMEKVGDKIHP                                                      | 155 |
| ALLIGATOR   | 40  |    | IEEFPRDREELKFLCFMEKVGDKIHP                                                      | 115 |
| SOFTCORAL   | 71  |    | LDEFQAKIEELKFLQSYVMKMGKINP                                                      | 146 |
| STONYCORAL  | 71  |    | LDEFQAKIEELKFLQSYVMKMGKINP                                                      | 146 |
| ACORN_WORM  | 73  |    | IDQYVSSKERLEFVYVFMIRADKKIVT                                                     | 148 |
| LANCELET    | 74  |    | LQDYLPKAVTEFLSFLAFLEKIGRKIVP                                                    | 149 |
| SEA_URCHIN  | 73  |    | KDEYGGSKVQLEFLFGFVQKAKELVLD                                                     | 149 |
| STARFISH    | 73  |    | KDELKGSQEQLLEFLHAPLKLKAGSRLLA                                                   | 148 |
| TERMITE     | 145 |    | ELFDKLNIPFKSNKsNTMPAKVQKHLHLGLIIVHKYPECLRPe-ETRLLLRILYSELEMQ                    | 219 |
| SHRIMP      | 151 |    | QFIERLCIDIRSAK---GSTVLQHQLQTLGMLMYSYPQNLRHq--SPILIKIFKQGLVKH                    | 218 |
| SCORPION    | 150 |    | KIVNKIIEYL-AQASKIIPTPVKQAYYLLGSSRHYPDQMCLc--SERLLNWLKDLKPH                      | 222 |
| ALVINELLA   | 104 |    | GIAEKLFYGLD--VHsSRHPSVQQRMYQLLGVIAEMYPPELMVR--HADRLVNVYVTTIKQ                   | 176 |
| CAPITELLA   | 148 |    | GMIERLFKEL--IKsPKPAAVKAHIFHLLGVIAELFPEKMRVg--SDKLLNLYMTTLKQE                    | 220 |
| SPONGE      | 143 |    | KIADKFFQAA-LLP-TKHSATIRGGYHLLGVLCWFFPEHLVKi--SSRLIDIYMSNLKSE[1]                 | 216 |
| OYSTER      | 148 |    | KMINKFFMEL-TKSvSKLPASVKESIVYLLGLLAEIYPEHMTQ--YAGKLVDIYLRALKAE                   | 221 |
| SNAIL       | 144 |    | NLVEKLFREL--TKT-SKLVPTVKGNIYFLLGVIAEVYPEDITQ--DSDRLVGLYVSAKAE                   | 216 |
| TRICHOPLAX  | 147 |    | KLVDKYSAC-QQP-TKSYSTVKSVMYLLGIAIEKFPPEYIMP--HAQOLLTIYINLLKSO                    | 219 |
| SEA_ANEMONE | 148 |    | KLIDRYFKAC-LQS-SKQSTVRFWLYTILGVFAEVPPEHMLG--NADRLISYINLNSE[1]                   | 221 |
| PRIPAPULA   | 150 |    | KLIDRYFNEL-TQS-SRLTSTVKGYYHLLGVIAESYPELMVA--YADKLIISYVNELKNO                    | 222 |
| ESHARK      | 155 |    | EIPNKFYGLD-SQK-SKFPDVLKVEYELLLGVIAEVQPTMELH--NSEKLFRAFLNLRVSG                   | 227 |
| STERLET     | 160 |    | DMFNKFYGLD-AQK-SKIPDVLKVEYELLLGVIEVQPSDMLN--NSEKLYRAYLSELKSO                    | 232 |
| COELACANTH  | 152 |    | EMFNKFYGLD-AQR-SKLPDVLKVEYELLLGVIEVQPSMELH--NSEKLFRAFLGELKTO                    | 234 |
| HUMAN       | 151 |    | ELFSKFYGLD-ALK-KKIPDVLKVEYELLLGVIEVQPSMELN--NAENLFRAYLSELKTO                    | 223 |
| CAECILIAN   | 157 |    | EIPNKFYSEL-GVK-SKVPDVLKVEYELLLGVIEVQPSDMLD--NSEKLFRAFLGELKTO                    | 229 |
| PLATYPUS    | 151 |    | GINVEKLYEL-ALK-TKIIDTVLEKIEYELLLGVIEVQPSMELC--NSEKLFRAFLGELKTO                  | 223 |
| CANARY      | 147 |    | EIPNKFYSEL-AAR-SKIPDVLKVEYELLLGVIEVQPSDMLN--NSEKLFRAFLRELKTO                    | 219 |
| OSTRICH     | 118 |    | EIPNKFYSEL-ATR-SKVPDVLKVEYELLLGVIEVQPSDMLN--NSEKLFRAFLGELKTO                    | 190 |
| TURTLE      | 156 |    | EIPNKFYSEL-AAR-SKVPDVLKVEYELLLGVIEVQPSDMLD--NSEKLFRAFLGELKTO                    | 228 |
| ALLIGATOR   | 116 |    | EIPNKFYSEL-AGK-SRVPDVLKVEYELLLGVIEVQPSDMLD--NSEKLFRAFLGELKTO                    | 188 |
| SOFTCORAL   | 147 |    | NIVEKLYEL-SQS-TKKKSSVSYGIYSLLGVIAEYPEYIMP--KADRLVQIYVGLKAE                      | 218 |
| STONYCORAL  | 147 |    | KIPDKYFAGL-IQP-VKHSSTVYKWLFSLLGIAKVPPECVIS--HSDHLVKNYVSLKLE[6]                  | 225 |
| ACORN_WORM  | 149 |    | KLIDKYSQ-LMQP-SKLAATVVKHGIVYHLLGVFAQYVPELMTK--YSDRLLVNVMKALKSO                  | 221 |
| LANCELET    | 150 |    | DMVDRMFLLEL-TMK-SQTTATVKSAGSLLGVISEVYVPELMTKdHPDRLLKVIYSMLKBEQ                  | 224 |
| SEA_URCHIN  | 150 |    | AMKLFKFFGEL-GQP-SKLSQSVKLGQYTLGAFGEYIYPLMMH--YSDRLFNVLVSTLQKQ                   | 222 |
| STARFISH    | 149 |    | KMLLYFQEQL-MQP-SKLSQTVKQYICLLGVIAEYIYVPLMSG--YSERLLSVYIATLNQO                   | 221 |

Supplementary Figure 3: DNA-PKcs COBALT Metazoa Vertebrate Invertebrate

|             |     |                                               |                                                     |        |     |
|-------------|-----|-----------------------------------------------|-----------------------------------------------------|--------|-----|
| TERMITE     | 220 | LNGLTEFLYVFPKLPQE--KEARRIYDCVTAVARK [ 2 ]---- | EMRVAPRCALGLIQAHGGLAKFLYDEYKFw----                  | HEFL   | 289 |
| SHRIMP      | 219 | LRGLALYLHHPPEIGDDPQLFTELYKHIIKVLNP            | DLNLPRRDAQRAALELIHTHGAKFSQQLFEDCTQ----              | VFQWF  | 292 |
| SCORPION    | 223 | LQGLNEFMYPPLQDEDTKAYQLFKFIRIILSK [ 1 ]--      | DVKTYDMAKASLTLSSHASLLAQFLYEDSMN----                 | YKII   | 295 |
| ALVINELLA   | 177 | LRGLCHLLVHFTQSAEEAAHSCDIKYKCAAIK [ 2 ]        | NEKLSKYEMAESGLKLLAKHASQFNKFLDEYKI----               | MYERL  | 252 |
| CAPITELLA   | 221 | LQGLTHFMVNFQSADEGAEHAYSIIKYCVKTMDO            | NIKKRYEMPKASLGLMAKHASQMSDYLLDDFKD----               | LYETL  | 294 |
| SPONGE      | 217 | LYGLTAYLNNFSQSAEGSGVYQDIYKYTRMAIDP [ 1 ]      | ANLTRYEVPRAGLSLSRHAQFREYLKDSH----                   | MYESL  | 290 |
| OYSTER      | 222 | LEGLASCLVNFTE--DEDSQNSYETFKFARMADP            | DINTRYDVPFRAGLKLFRSRSQAQFSQLADDYQG----              | MYQKL  | 293 |
| SNAIL       | 217 | LQGLTAYLVNFQSSDEGSSHSYEIFNYARMAIDH            | KVEFSKYDVPKAGLQLFARHAGQFSQFLVDDYEN----              | MYTKL  | 290 |
| TRICHOPLAX  | 220 | LRGLTAYLVNFQSSVEESKYAADIYKARLAIDP             | KVELPRYDLPKAGLNLAKHAAQFCDYISREAEA----               | LYEVI  | 293 |
| SEA ANEMONE | 222 | LKGLSSYLNVFQSAEESKPFARDIYEFTRMAIDV            | QGLTQRYDVPFRAGLNLSSRHAGQFQEYICTEHNVsliVPAI          |        | 298 |
| PRIAPULA    | 223 | LRGLTCYLNFTFSQSADEGSGYARDVYDCVMRCTGQ [ 1 ]    | LSEIRRYDVAKSALWLLAKHAAQLDRFLLDYKA----               | VYSC L | 297 |
| ESHARK      | 228 | LRGLTALMINFTKSMEDPKASKDIFDYALKAINP            | QIDLKRYAVPLAGLRLFTLHSSQFGTCLMDNYRT----              | VFEKM  | 301 |
| STERLET     | 233 | LRGLTALMINFTKSMEDPKSKEIFDFALKAISP             | QTEFKRYAVPLAGLRLFAKHAGQFSCLMDNYRS----               | LYEVM  | 306 |
| COELACANTH  | 225 | LRGLTALMINFTKSVDEDPKTSKEIFDYAVMAISP           | QVDLKRYAVPLAGLRFALHAGQFNCTCLMDNYRS----              | LFEFM  | 298 |
| HUMAN       | 224 | LKGLSSLLCNFTKSMEDDPQTSREIFNFVLKAIRP           | QIDLKRYAVPSAGLRLFLALHASQFSTCLLDNYVS----             | LFEVL  | 297 |
| CAECILIAN   | 230 | LRGLTALMINFTKSMEDDPKVSKEIFDYSVKAISP           | QVELKRYAVPLAGLHMLAIHASQFSGCLMDNYRS----              | LYEVM  | 303 |
| PLATYBUS    | 224 | LKGLSALMCFNFTKSMEDDPQTSKEIFDFAVKAISP          | QVDLKRYAVPLAGLHLFTVHASQFGTALLLDNYVY----             | LFEVM  | 297 |
| STONYCORAL  | 226 | LRGLTALMINFTKSMEDDPQTAKEIFDFAMKAISP           | QVDQKRYAVPLAGLQLFWHSAQFGLLDLDNYVS----               | LYEVM  | 293 |
| CANARY      | 220 | LRGLTALMINFTKSMEDDPQTSKEIFDFAMKAISP           | QIDQKRYAVPLAGLQLFGRHAAQFGTFLLDSDYVS----             | LFEFM  | 264 |
| OSTRICH     | 191 | LRGLTALMINFTKSMEDDPQTSKEIFDFAMKAISP           | QVDLKRYAVPLAGLHLFMSHAAQFGTFLLDNYIS----              | LFEVL  | 302 |
| TURTLE      | 229 | LKGLTALMINFTKSMEDDPKTSKEIFDFAVKAISP           | QVDLKRYAVPLAGLRFGLHAAQFGTCLLDNYVM----               | LFEVM  | 262 |
| ALLIGATOR   | 189 | LKGLTALMINFTKSMEDDPKTSKEIFDFAVKAISP           | KINRYAVDVPFRAGLFLARHAGQFKEYLTKDYES----              | VYNTL  | 292 |
| SOFTCORAL   | 219 | IRGLDSTLVNFQSSVNEGSIYAKNIYSFLRSAIDS           | QVLSRYEVKAGLRLFAKHSAGQFKEYIAKDYEV----               | MYGDL  | 299 |
| STONYCORAL  | 226 | LRGLTALMINFTKSMEDDPKTSKEIFDFAMKAISP           | STQLLRYGVPKAGLWLLAKHAAQFKNYLLDDHEE----              | MYDKL  | 295 |
| ACORN WORM  | 222 | LRGLTALMINFTKSMEDDPKTSKEIFDFAMKAISP           | QVEMARYDVPKAGLWLLAKHAAQFNEYLMDYED----               | MYRKL  | 298 |
| LANCELET    | 225 | LRGLTALMINFTKSMEDDPKTSKEIFDFAMKAISP           | SGTKPRYEIPKAGLNLIRRHADQFNEYLKRDHEM----              | VYNRL  | 300 |
| SEA URCHIN  | 223 | LMGLSHLLVNFQSSVEENSKHKDIYQVYTMVSDP [ 4 ]      | TVDHTRYELNKAGLNFMAKHSAGQFPLYSDHQD----               | LHEAF  | 295 |
| STARFISH    | 222 | LRGLTALMINFTKSMEDDPKTSKEIFDFAMKAISP           |                                                     |        |     |
| TERMITE     | 290 | LKWINSACED--HKAGVSALDVFYVQVASILKDN--TSETG---- | HHVFLYFINFFKNKMLSSSTSSYDMKLVKAFGLFA                 |        | 362 |
| SHRIMP      | 293 | VKWCGRNRDDHKAALPAMDTFIVVIANMLELQ--AMED--      | DKRGVKIFKYLLEQYKNKMLTSESTSK--LSLAVKGYGLLS           |        | 368 |
| SCORPION    | 296 | EIWTNHSNREVRSLGYNALDAVFKQISD--MLEQ--NYE       | DS--CKAEI--FKPFIEKQMLIKCSE--NIRRVSTAIRGFGYFA        |        | 329 |
| ALVINELLA   | 253 | AFWCHHNRVMMHGLFSAMEAFFKQISAHVLL--ANEG--       | RKERSIFMFMEEFRKIMDNPESSSKEISLAIHGCGYFA              |        | 368 |
| CAPITELLA   | 295 | SYWTHNNNREMAHIGMLALEDFLVQISSALVTK--           | VKEG--NRKEGAVFKFPIQKFRDMDNNSGSKETAIAIKGCGYFA        |        | 371 |
| SPONGE      | 291 | SSWSNHNKMKCRVAVNAIGSFFREVSTQISDP--SIS--       | RELGISNYKFKMCKFRSLMNDPDIHNRLLSIAVKGYGHPA            |        | 366 |
| OYSTER      | 294 | KSWSKHNNRELLHLGTAAMEAFLTQISEVLVTK--AREG--     | KKEAAMFKFVTRFKIEMENSSASAKEMSLAIRGYGLLA              |        | 369 |
| SNAIL       | 291 | QAWSKHQNRDVLHGHVAAAMDALRQIAEAITEK--AKRG--     | IKEGGIFKPFVQVFTTMQNSSASSKEVSMVAVRGYGLFA             |        | 366 |
| TRICHOPLAX  | 294 | YRWCHHNRVMMHGLFSAMEAFFKQISAHVLL--ANEG--       | NINIFKFLKPKFRSIISSGSSDAKELAIKIRGYGYP                |        | 367 |
| SEA ANEMONE | 298 | YRWCHHNRVMMHGLFSAMEAFFKQISAHVLL--ANEG--       | FIQRFRAIIDSSTTQMSIAIRGYGYP                          |        | 371 |
| PRIAPULA    | 299 | RSWSNHNKMKCRVAVNAIGSFFREVSTQISDP--SIS--       | RQRDTIVFTVFREFTIIE--AGTDRDVAIAVRYGGSFA              |        | 373 |
| ESHARK      | 302 | KKSCGHTNSEMKKASYSALESFLKQVAI--QVAE--NAHL--    | HKDKL--EYIMQFYDIIRTPESMKELSAIRGYGLFA                |        | 374 |
| STERLET     | 307 | SKWCGHNTNEMKKAGYHALEAFLKQVAL--LVAE--NAEL--    | HKSKL--EYFMRQFYTVIRTLDSSTKELSAIRGYGLFA              |        | 379 |
| COELACANTH  | 299 | YRWCHHNRVMMHGLFSAMEAFFKQISAHVLL--ANEG--       | HKNKL--EYFMKQFYGIIRTLDSNNKELSAIRGYGLFA              |        | 371 |
| HUMAN       | 298 | LKWCAGHTNDELKKAALSALESFLKQVSN--MVAK--NAEM--   | HKNKL--EYFMEQFYGIIRNVDSNNKELSAIRGYGLFA              |        | 370 |
| CAECILIAN   | 304 | SKWCGHNTNDELKKAAGHSALESFLKQIAS--IVTH--DAET--  | HKSKL--EYFMQFYRIIRKLDSSNNKELSAIRGYGLFA              |        | 376 |
| PLATYBUS    | 298 | AKWCGHNTNDELKKAAGHSALESFLKQIAS--IVTH--DAET--  | HKSKL--EYFMEQFYRIIRKIDSTNNKELSAIRGYGLFA             |        | 370 |
| CANARY      | 294 | KWCGHNTNDELKKAAGHSALESFLKQIAS--IVTH--DAET--   | HKSKL--EYFMEQFYGIIRRMDSNNKELSAIRGYGLFA              |        | 366 |
| OSTRICH     | 265 | SKWCGHNTNDELKKAAGHSALESFLKQIAS--IVTH--DAET--  | HKSKL--EYFMEQFYGIIRRMDSNNKELSAIRGYGLFA              |        | 337 |
| TURTLE      | 303 | SKWCGHNTNDELKKAAGHSALESFLKQIAS--IVTH--DAET--  | HKSKL--EYFMEQFYDIIRKMDSSNNKELSAIRGYGLFA             |        | 375 |
| ALLIGATOR   | 263 | SKWCGHNTNDELKKAAGHSALESFLKQIAS--IVTH--DAET--  | HKSKL--EYFMEQFYDIIRKMDSSNNKELSAIRGYGLFA             |        | 335 |
| SOFTCORAL   | 293 | FDWCKRKNKELRVKGFALAEFLKQVAECLVTE--DFETT       | VECGDI--FKYFIKFRRIINSNESLREISIAIRGYGYP              |        | 369 |
| STONYCORAL  | 300 | YRWCHHNRVMMHGLFSAMEAFFKQISAHVLL--ANEG--       | KSDLAMFMYFIKTFRRIIDSVLSDTRQMAIAVRYGYP               |        | 374 |
| ACORN WORM  | 296 | FSWCCHHNRVMMHGLFSAMEAFFKQISAHVLL--ANEG--      | TKKDKR--NKT--TIFKAFIRKFRSIIIDNRESGTRICIAIKGYGLFA    |        | 372 |
| LANCELET    | 299 | YEWQHPNRDLKQAGYAALESFLKQISDMLVARHEKEN--       | NKADLAVFKFPIREFTIITDTTEAGTREMIAVRYGYP               |        | 376 |
| SEA URCHIN  | 301 | KYWSHSHNSEMKNAGYDALQAFKVVSH--MLVE--RAKK--     | RSDVAVLVKVFYKSFRTIDDASSSSKSLSTAIRGYGYP              |        | 377 |
| STARFISH    | 296 | NKWSAHNPAVKAVGFAAQEAFLLQIAEILV--E--RAAK--     | DASDMAVFRFVVKFRDIIDNPQSDTRALSSAVRYGYP               |        | 372 |
| TERMITE     | 363 | APCRVYMPQDVLVYMFVVMQRAEQIYF                   | KEG--DISNADLQNLDPYIESLSSIMRQLSAVTNEQLVALQCLTVQLIEN  |        | 438 |
| SHRIMP      | 369 | GACRQFLSPVEVHFMFSQVLTAHQHAFY                  | -QsGDMLNENKLTNLPYSYIESLAIISNMVDVNSGILENVQQLSSALVEH  |        | 444 |
| SCORPION    | 370 | KVKCLYLTEKDVKYMNDVIKSEQHCL                    | NEE--KILDERITILPFLDLSLSSIVLQQLQEISESSLNLYEKLAVFQIQN |        | 445 |
| ALVINELLA   | 329 | TPCRIFLSDQDVKFMFTEVMQRSEQMLI                  | VQA--EYLLDDRITSLPHFLALASIKELSEVDTLILLVEKLLILLVEH    |        | 404 |
| CAPITELLA   | 372 | APCKLYLTPKDVLFMFMNEMLRSEQLFL                  | -SGaEQNDDRIIGLHSLGALASIVEELDQFSETFLFSLERLVVLMQV     |        | 447 |
| SPONGE      | 367 | KPCRLYGSMEDLHFMFMGEMVQRSEQLFL [ 6 ]           | -TSSsSVAPEERFLLPTFIEALANISKEIQNLDPVCSLSSQLSVLPHC    |        | 449 |
| OYSTER      | 370 | APCRREFLQKDVQFMFSEMITKSEQLYL                  | SSDKEDIEDKLYSLPSYLEALGNIRQLDHPETAYATSIERLMIILAEN    |        | 446 |
| SNAIL       | 367 | APCSIFLEPADVTFMFMSEMITKCEQEF                  | RTN--BPVHEKLSLDPYLHALASIKVVTKVSEVYALTLELRLVLLLEN    |        | 442 |
| TRICHOPLAX  | 368 | APCKTLKDKDVRFMFMDLLQRSEQLFF                   | --I--DVNVDKIQYLPSPLEAFASILNLDVNDTFFTRSEKLTIVLFPEN   |        | 441 |
| SEA ANEMONE | 372 | KPKCLFMTAEDVDFMFMTEMMQRSEQLFF                 | RQS--EMQEDRVQPNFLALASIFIEELDDISDGLVLSLERLIVLFPES    |        | 447 |
| PRIAPULA    | 374 | TPCKLFLSEADVQYMFTEMMVRSRQIFH                  | -SGeEMIDSRMVELPPLLEALASIVTELDQVSEFLASLQVLVLLFGN     |        | 449 |
| ESHARK      | 375 | APCKA--VNSNDVDFMFIELIQRCKQMYL                 | TEA--DTEDDNVYQLPSFLDSIASVIFHLDKIPGVYTPVLERLIVVQIDS  |        | 449 |
| STERLET     | 380 | APCKA--VCLGDVDFMFIELIQRCKQMYL                 | TET--DTEDDNVYQLPSFLDSIASVIFHLDRIPEVYTPVLERLIVVQIDS  |        | 454 |
| COELACANTH  | 372 | APCKA--VCPEDVDFMFIELIQRCKQMYL                 | TET--DTEDDNVYQLPSFLDSIASVIFHLDRIPEVYTPVLERLIVVQIDS  |        | 446 |
| HUMAN       | 371 | GPCKV--INAKDVFDFMFIELIQRCKQMYL                | TQT--DTGDDRVYQMPSPFLQSVASVLLYDTPVEVYTPVLEHLVVMQIDS  |        | 445 |
| CAECILIAN   | 377 | APCKV--INAKDVFDFMFIELIQRCKQMYL                | TEA--ETEDDNYQLPHFLQSIASVIVHMSDIPVEVYTPVLERLIVVQIDS  |        | 451 |
| PLATYBUS    | 371 | APCKV--INPNDVDFMFIELIQRCKQMYL                 | TEA--ETIDHDLFQLPSFLQSIASVILHLDKIPGVYTPVLERLIVVQIDS  |        | 445 |
| CANARY      | 367 | SPCKA--IHPEDVDNMYVELLQRCKQMYL                 | TEA--ETIDHDLFQLPSFLQSIASVIFHLDKIPGVYTPVLEHLVVLQIDS  |        | 441 |
| OSTRICH     | 338 | APCKA--IRSKDVFDFMFIELIQRCKQMYL                | TEA--ETVDDHIYQLPSFLQSIASVIFHLDKIPGVYTPVLERLIVVQIDS  |        | 412 |
| TURTLE      | 376 | APCKA--INSKDVFDFMFIELIQRCKQMYL                | TEA--ETADEHYQLPSFLQSIASVIFHLDKIPGVYTPVLERLIVVQIDS   |        | 450 |
| ALLIGATOR   | 336 | APCKA--INSKDVFDFMFIELIQRCKQMYL                | TEA--ETADDNVYQLPSFLQSIASVIFHLDKIPGVYTPVLEHLVVMQIDS  |        | 410 |
| SOFTCORAL   | 370 | KPKCLFLKDEDIKYMFTSIIQMSQMYF                   | NDS--ELKKEKLNLPSPLEALGFVIEEDIEPPAFSLFLERLIVVLEIK    |        | 445 |
| STONYCORAL  | 375 | KPKCLFMQADDVDFMFMSEMITKSEQLYL                 | SQS--DLSBDRQHLPPTLEALSSIEELDKISDSVFLACMERIVVLPDK    |        | 450 |
| ACORN WORM  | 373 | APCKLFLSEDDVDFMFMSEMITKSEQLYL                 | SON--ELVDETIPLHPSFLALACIVRELDVSDTFLSSLETMTVILMEN    |        | 448 |
| LANCELET    | 377 | APCKMFLSESDVDFMFMSEMITKSEQLYL                 | GTA--EMEDKVHLLPSFLALASIVQLDQSDMFPVTSLERLIVVLPEN     |        | 452 |
| SEA URCHIN  | 378 | APCKAFMKEADVDFMFMSEMITKSEQLYL                 | VQG--EERLSQLPTYLEALASIVGQLDVTSDTFLTSLEKLVVLPFGS     |        | 450 |
| STARFISH    | 373 | APCKLFMDDVDFMFMSEMITKSEQLYL                   | -QqGEVSDDKLNQLPNFLALASIMRQLDVLSDSFQAALERLIVVQVSS    |        | 448 |

Supplementary Figure 3: DNA-PKcs COBALT Metazoa Vertebrate Invertebrate

|             |     |                                                                                      |     |
|-------------|-----|--------------------------------------------------------------------------------------|-----|
| TERMITE     | 439 | FPK--LPKPFHWAIRAITVTLSSLAESGGTfLEEFLSNVVYQGIIRSCKHQIAIDV-----ELQKq-----              | 498 |
| SHRIMP      | 445 | FPL--VSSFRFLAYRALFRFFVYVYKPGY-PHEPLHTFVYKAVLSCSHAPEVES--SPGEGSSWRG--KAGGGEW          | 517 |
| SCORPION    | 446 | FPY--LSPPYHFLCYNSLKLFLVAHVSXGPO-FKGLNKKIIVYQGIIRTCSPYVRFELI-----EAreENMSSGDLN        | 511 |
| ALVINELLA   | 405 | SPK--LPKPLHYIFVVFILKVCFSLTPKGSV-FRSPISRFFVYQALLRTRCSHPAVTTT--FDDDGQELDPe-----        | 469 |
| CAPITELLA   | 448 | LPR--LHVKLHNQCYIALIRLFLGLALKGSII-FKGFLEIRIYQSLIRSCSHPIVLESqEAKSENVDENVLk-----        | 515 |
| SPONGE      | 450 | YPF--LSSHVRYQGSVSLKLIMAVSS IPTS-FKQFLSHIVYQGVIRSCSLPVVIEA--VQGDSDAVVTA-----APL       | 517 |
| OYSTER      | 447 | FP--tIHQKQHFPSVSKSLLWVLTITMPKGEV-FSQVLSGFVQMLIRTCSSHPPLIET-----ED--MTESNQSE          | 510 |
| SNAIL       | 443 | IP--tIYRGHFHTCLRGILHLILVLSQKGSF-PNKVLSGFVYQGLIRTCSSHPVMA-----DE--NQEISTAE            | 506 |
| TRICHOPLAX  | 442 | FPY--VINELHSLCYKSLPELLLALHSGAA-LKNFLSRVVYQGLIRTCSSHPVYV-E-T--DSDLNISQ-----DSV        | 506 |
| SEA ANEMONE | 448 | FPR--LSKSAKYLCHKALVKMLINISAKGSV-LKNFLSRVVYQGLIRTCSSHPVLL-D-E--GPDVVKQV-----GVV       | 512 |
| PRIAPULA    | 450 | VPLlrRESRLDHRACGAVRVLLALRSKRAT-QRSLVKKRVVQGLLSTCSHPVAMET----SSVFSQNA--DDVDDDFQ       | 521 |
| ESHARK      | 450 | FPL--YSARMQPICCRSIVKVFVALAGKGPV-LWNFIISTVVHQGLIRVCSKPVLLPG-EGTGRSESGLQ-----QQSASEVM  | 522 |
| STERLET     | 455 | FPQ--YSQRMQPVCCRSILKVFIALAGKGPV-LWSFISTVVHQGLIRVCSKPVVLTG-EEGQGGGGQ-----PVEKGGV      | 524 |
| COELACANTH  | 447 | FAQ--YSKMLHYTCCKSIVKVFALAGKGPV-LRNFISTVVHQGLIRVCSKPVVLTG-EGIKGGLQSEeEadPAPGEV        | 522 |
| HUMAN       | 446 | FPQ--YSKMLQVCCRAIVKVFALAAAGKGPV-LRNCISTVVHQGLIRVCSKPVVLTG-G---PESESE--DHRASGEV       | 514 |
| CAECILIAN   | 452 | FSQ--YSVKMQSVCCRSIIKVFALAGKGPV-LWNFIISTVVHQGLIRVCSKPVVLTG-EGSGKSGPGESE--EPPVAEEV     | 524 |
| PLATYBUS    | 446 | FPQ--YSVKMQACCAIVKIFLALAGKGPV-LWNFIISTVVHQGLIRVCSKPVVLTG-EAYGRDASESD--DSSAFGEV       | 518 |
| CANARY      | 442 | FPQ--YTEKMQPVCCRSIIKVFLSLXGKGPV-LWSFISTVVHQGLIRVCSKPVVLTG-DFSVKETSQTE--EAFEAGEV      | 514 |
| OSTRICH     | 413 | FPQ--YSKMLHYTCCKSIVKVFALAGKGPV-LRNFISTVVHQGLIRVCSKPVVLTG-EYFGKGLQSE--ESPAGEA         | 485 |
| TURTLE      | 451 | FPQ--YSVKMQSACCSIVKVFALAGKGPV-LWSFISTVVHQGLIRVCSKPVVLTG-EIFGKEVSKLE--ESTTAGEV        | 523 |
| ALLIGATOR   | 411 | FPR--YSKMQPVCCRSIVKVFALAGKGPV-LWNFIISTVVHQGLIRVCSKPVVLTG-EFDGKGASKSE--EPPAVGEV       | 483 |
| SOFTCORAL   | 446 | FPE--LGRGPFQICLAKMLKFLALTRRAS-LKFLSEIVYQGLIRTCSSHPVLL-D-E--GVDAME-----G-V            | 507 |
| STONYCORAL  | 451 | FAI--LNRGGKFLCCRALIRVFLHLSXKAT-LRNFISTVVHQGLIRTCSSHPVLL-K-EVNGESTIMEE-----REV        | 517 |
| ACORN WORM  | 449 | FP--fYKMLHYTCCKSIVKVFALAGKGPV-LRNFISTVVHQGLIRTCSSHPVLEG-----EMYDVSQ--DETSDELL        | 517 |
| LANCELET    | 453 | FP--LQKMLHLCQKAILKVLALVPKAT-LRNFISTVVHQGLIRTCSSHPVLEG-GTAEDELPVAGS--EGEGQQP          | 527 |
| SEA URCHIN  | 451 | YP--hQARSSQWTSASHAILQILIALSAGTS-LQKFLSRVVYQGLIRTCSSHPVLLS--GGDE----GE--EQRSDEME      | 518 |
| STARFISH    | 449 | YP--fVPNKYQYLSHQAILLVLIALSSKAT-LQKFLSRVVYQGLIRTCSSHPVLLS--SPSIDHPVLGN--DDQDTEAD      | 521 |
| TERMITE     | 499 | -QFHEENVFYKDYIPLWKELLSVNPFQKRSTSL-----TQTQLIVKVVYDKLVNIVLVLMKKLDLSTRKKTNiaL--        | 568 |
| SHRIMP      | 518 | KGLKNEVVTFSYIPLWALMPEKVANIKVSG-----MPATVMTEMSNFIYSEFISCIILEISEKLDLTYKQNELqqQ--       | 591 |
| SCORPION    | 512 | ELKNPREITSKSYSSLWENLLYIVRNKELNHIG-----ISLEDRHNLQLIYDEIISVVLTLKKLDLATTHSMQdseI--      | 585 |
| ALVINELLA   | 470 | --YRTRRTYKDYILNMWCKLLTCSRFEKELKHLG-----VGVVECAQFTEILYDELVSILRVLDRDLTCRDIVV-----      | 530 |
| CAPITELLA   | 516 | -----VDVYQDYLPWKKALLTAGLKLALGGYQY-----ITAEQHRVLAASAIYDELLSAMLKMIIRLDSNSTDS-----      | 587 |
| SPONGE      | 518 | ADSNDKVMSYLDVYVQLWQIQLIDYKYLKGMGMDFDL-----ELRQSIHQLVYSEFIQSLNLRKLDLFTTASTTEdgim-a    | 591 |
| OYSTER      | 511 | Q--TGTKTVTFKFDIELWDTLFSNPRIKESFVAD-----ISVVEVRLALTEAVYDELINSVRLMKLDLTSQSSTEvaqQ--    | 582 |
| SNAIL       | 507 | TDLTVKQITYKDYLEVWVSGLLESKIKDLIQDG-----IGFAERDQLTHAVYNELMQAILKVIISKLDLSTT-----Q--     | 574 |
| TRICHOPLAX  | 507 | ILETGPRISYKDYISLWKNLIQATEIKGL-----TLITTDREHIIVYQSLYNELHSLQRIILKLDLTSQQT--i           | 577 |
| SEA ANEMONE | 513 | TGSRSDQVTKDYILPWRHLLDKTKFKMYLLFQSLSLSDIEKRESLHELVDLVCALIRIIEKLDLTSKHG--qQdl          | 589 |
| PRIAPULA    | 522 | -ERDRPNTIYIDYDMWRHLLGSDMKGLNELG-----VMSDRKALTCVYDEIVTSLMKIVGKLDLSTSKSTDPsqV--        | 594 |
| ESHARK      | 523 | WTGKWRVPSYKDYLDLFRSLLNCGMKKEFGLVD-TLGMINLPLQSLNRLLYDEFIKSIKILIEKLDLTSVEKQNO-----     | 595 |
| STERLET     | 525 | HTGKWKVPSYRDYLDLFRNLLCEDMKDTPGVDFADVRSSLSLNLRLLYDELIKSIKILIEKLDLTSVQKQA-----         | 598 |
| COELACANTH  | 523 | RTGKWKVPSYKDYLDLFRNLLCEDKRLQKALVDETFGVNPSLQSLNRLLYDELIKSIKILIEKLDLTSVQKQV-----       | 596 |
| HUMAN       | 515 | RTGKWKVPTKYDYLDLFRHLLSDQMDLADAEAFSVMSSSELNHLLYDEFKSVLKIIEKLDLTSVQKQV-----            | 588 |
| CAECILIAN   | 525 | RTGKWKVPTKYDYLDLFRSLLNCDKMKESIFSDVEF--SVNSPLQSLNRLLYDELIKSVLKIIEKLDLTSVQKQV-----     | 597 |
| PLATYBUS    | 519 | RVGRWKVPTKYDYLDLFRSLLNCDKMKESVDFANFLTEKAQLQSLRVLVYDELIKSVLKIIEKLDLTSVQKQV-----       | 588 |
| CANARY      | 515 | GTQRSKLPKYDYLDLFRSLLNCDKMKESVDFANFLTEKAQLQSLRVLVYDELIKSVLKIIEKLDLTSVQKQV-----        | 588 |
| OSTRICH     | 486 | GAGKWKVPTKYDYLDLFRSLLNCDKMKESVLEDENFLAANSALKLSRLLYDELLKSVLKIIEKLDLTSVQKQV-----       | 559 |
| TURTLE      | 524 | RTGKWKVPTKYDYLDLFRSLLNCDKMKESVLADETFLIANSPLLSLNLRLLYDELIKSIKILIEKLDLTSVQKQV-----     | 599 |
| ALLIGATOR   | 484 | RTGKWKVPTKYDYLDLFRSLLNCDKMKESVDFANFLTEKAQLQSLRVLVYDELIKSVLKIIEKLDLTSVQKQV-----       | 557 |
| SOFTCORAL   | 508 | TEFDVRIHSYKDYLEWCEFLDGGQYKD-----QSImpKVSILTQDIHRAIYDELIQAAILKVAHKLNLSSFRDVEtdqEdl    | 583 |
| STONYCORAL  | 518 | YEGSTPNTSLKDYLELWEYLLDKDKLKD-----ESLgKQLERKVMHGLVYDEMIRGILRIIIEKLDLSSKGSsaqeGdi      | 593 |
| ACORN WORM  | 518 | ID--ARKVSYKDYLDLWNLHLLDSSQLR-ITDYG-----LSPQDCKVLHNIYVDELIQAAIRILGKLDLSSNKDGGqlgnE-l  | 589 |
| LANCELET    | 528 | QQPPVWRVPSYRDYLDLWNLHLLDSSQLR-ITDYG-----VAVADRQAMHRLVYDELVTSLVKIIEKLDLTSKQVETgnEel   | 603 |
| SEA URCHIN  | 519 | IEQDSRRVSYKSPMDLWTRLLDSKFIKTSEAHG-----SSYAERLNIHTMIYNELIGGILKVLKLDLSSNKHNEeaS--      | 592 |
| STARFISH    | 522 | ILADARHTYKDYVVKLWASLLDSTHVKEVQAMG-----MNYADRRKIHTIYDELIQFISILKILSKLDLTSNK-DtTelq--   | 594 |
| TERMITE     | 569 | -----STSGGASEADI -PV--LDPESGLEANNRKFQVFINLVDLTRDVLMSVDCSQFEKWIQPFYKVISSESNK          | 636 |
| SHRIMP      | 592 | -----EEVSGSDE [2] -PA-tSDPVSGLKAKVPKDFQVYMNVSLEKVLPLQSEDLPHIPRLVWFFVQSSIQ            | 659 |
| SCORPION    | 586 | ---KDSNLQFETSEL [2] -T-VSDPFYGLQSKPKDFRVMNIVDFCKDLFISKHNELEKWIIFGLEIIFQFNKN          | 657 |
| ALVINELLA   | 538 | --dkDQDQDFEASEDSV ISN-----KKQAPKPKDYIVFINLVDFCQDLPLSPVHKELFHKWLFTFGHQLIVHSTMH        | 605 |
| CAPITELLA   | 581 | -----ESQPS TSEPAL [2] -PS--SDPLRGLHAVCPEDFILLNLVLSRDLPLVPTQKQFSSVWVFPFHQLLQSSKL      | 650 |
| SPONGE      | 592 | N---EGEGGGGSGGDDP VIT--SDPVLGRQFVAVPKDFQFINLVDELAKKIVPSVLSLFTPWILTFSQEVVSLATRY       | 663 |
| OYSTER      | 583 | -----QEGPTSSNESE- [1] -V--sSDPLHGMQPKPKDFQFINLVDFCQDLPLSPVHKELFHKWLFTFGHQLIVHSTMH    | 651 |
| SNAIL       | 575 | -----RESESTGTSEEK [2] -ITqSGDPVHEIEANRPMDFQVFINLVDFCQDLPLSPVHKELFHKWLFTFGHQLIVHSTMH  | 642 |
| TRICHOPLAX  | 578 | E---EETQSS-----GT--SNPVAGLKNVVPKDFQVFINLVDFCQDLPLSPVHKELFHKWLFTFGHQLIVHSTMH          | 642 |
| SEA ANEMONE | 590 | Q---VRDQPQE----- [3]ETT--SDPVALGRQFVAVPKDFQVFINLVDFCQDLPLSPVHKELFHKWLFTFGHQLIVHSTMH  | 658 |
| PRIAPULA    | 595 | -----HDGSGGASSESP [2] -YSggSDFADGLVPCRPKDFLVPFNLFVFTKDLSTNQALFRNRIYTYGHEVILLSTRW     | 667 |
| ESHARK      | 596 | R---EEEGSGDVSNNGV IPT--SDPAADLQFVAVPKDFQVFINLVDFCQDLPLSPVHKELFHKWLFTFGHQLIVHSTMH     | 667 |
| STERLET     | 599 | D---EQEGRS DASSML IPS--SDPAANLQFVAVPKDFQVFINLVDFCQDLPLSPVHKELFHKWLFTFGHQLIVHSTMH     | 670 |
| COELACANTH  | 597 | G---DQEGEDTPSSTII IPT--SDPAANLQFVAVPKDFQVFINLVDFCQDLPLSPVHKELFHKWLFTFGHQLIVHSTMH     | 668 |
| HUMAN       | 589 | G---EQEGEDAPGVMM IPT--SDPAANLQFVAVPKDFQVFINLVDFCQDLPLSPVHKELFHKWLFTFGHQLIVHSTMH      | 660 |
| CAECILIAN   | 598 | G---EQQDASDEDSALV IPT--SDPAANLQFVAVPKDFQVFINLVDFCQDLPLSPVHKELFHKWLFTFGHQLIVHSTMH     | 669 |
| PLATYBUS    | 592 | G---EK-DESEVSNLWV IPT--SDPVALHPSKPKDFQVFINLVDFCQDLPLSPVHKELFHKWLFTFGHQLIVHSTMH       | 662 |
| CANARY      | 589 | S---EQ-DGNAGDSALV GPS--SDPASNLQFVAVPKDFQVFINLVDFCQDLPLSPVHKELFHKWLFTFGHQLIVHSTMH     | 659 |
| OSTRICH     | 560 | N---EQ-DEDETDLSALV VPT--SDPASNLQFVAVPKDFQVFINLVDFCQDLPLSPVHKELFHKWLFTFGHQLIVHSTMH    | 630 |
| TURTLE      | 598 | S---EQ-DENEAGSDLV VPT--SDPASNLQFVAVPKDFQVFINLVDFCQDLPLSPVHKELFHKWLFTFGHQLIVHSTMH     | 668 |
| ALLIGATOR   | 558 | S---EQ-AESESGDVM IPT--SDPASNLQFVAVPKDFQVFINLVDFCQDLPLSPVHKELFHKWLFTFGHQLIVHSTMH      | 628 |
| SOFTCORAL   | 584 | Q---TEQSPSPDAPLTL [2] GGT--TDPISGLQFVAVPKDFQVFINLVDFCQDLPLSPVHKELFHKWLFTFGHQLIVHSTMH | 657 |
| STONYCORAL  | 594 | L---GKSSASDVASAT [4] VSL--SDPVLGRQFVAVPKDFQVFINLVDFCQDLPLSPVHKELFHKWLFTFGHQLIVHSTMH  | 669 |
| ACORN WORM  | 590 | SadpEPGTSDDGRSSPVT [1] -LS--SDPSSGLTPKPKDFQVFINLVDFCQDLPLSPVHKELFHKWLFTFGHQLIVHSTMH  | 664 |
| LANCELET    | 604 | TadvS-GSQDGTTS-----DPAFAGLQAAPKDFQVFINLVDFCQDLPLSPVHKELFHKWLFTFGHQLIVHSTMH           | 670 |
| SEA URCHIN  | 593 | -----TSGGGLQFVAVPKDFQVFINLVDFCQDLPLSPVHKELFHKWLFTFGHQLIVHSTMH                        | 661 |
| STARFISH    | 595 | -----DQVAVDSST [2] -AS--SDPLHGLHATPKPKDFQVFINLVDFCQDLPLSPVHKELFHKWLFTFGHQLIVHSTMH    | 663 |

Supplementary Figure 3: DNA-PKcs COBALT Metazoa Vertebrate Invertebrate

|             |     |                                                                                   |                                |                                |         |     |
|-------------|-----|-----------------------------------------------------------------------------------|--------------------------------|--------------------------------|---------|-----|
| TERMITE     | 637 | PLVSGFYKLLTVALQCLDRHLYFS-----D[ 2]DMLNQP                                          | TEQKASYSLLCRFLOELLI            | RLQQYKN                        | 695     |     |
| SHRIMP      | 660 | PLVSAHYNATTIVLTCRSRQTQFFS-----[ 3]D----                                           | PEVETSIHLLMSYVRELLQ            | RCRQYRD                        | 713     |     |
| SCORPION    | 658 | PYISGFYKLLTIVLCTTICKKTRFYQ-----HVKKLKT[ 2]EISMSE[ 1]-DCLIAFELFAKFSREVI[ 1]-LQQFKD |                                |                                | 722     |     |
| ALVINELLA   | 606 | PVVSFGYKLLSVMSTVASRIDYFQ-GIGKKIEREDAN[ 11]DMEIDS[ 6]SQREASFMFSKFTKEVLV            |                                | KLKQSKD                        | 690     |     |
| CAPITELLA   | 651 | PLVSGLYKMLTVMCQVASQISYFK-EMNRQLKIETSD[ 6]DEEFRT[ 2]AQEEACFMFLTFKFAKAVMT           |                                | RLRQYKD                        | 726     |     |
| SPONGE      | 664 | PLVSGFYKLLTIVLCSICNKTHFFD--VHDLSSGQGTGD[ 1]DVAMET[ 3]TDRQSCYFLFSSFIKEVVV          |                                | QMQQYKD                        | 734     |     |
| OYSTER      | 652 | PLVSGYKLLAVSMKIANKLNIFYQ-GMVSLL-----[ 11]DSDQKA[ 2]HQRATCFQLIQKFTKEVLV            |                                | RMKQYKD                        | 725     |     |
| SNAIL       | 648 | PLVSGFYKLLAVTMKIANKLYFK-DIAVE-----[ 11]DETGID[ 2]TEKHLTYLILKFFSEEVLV              |                                | RMKFFHD                        | 721     |     |
| TRICHOPLAX  | 643 | PLVSGFYKLLICMTIISLSYFE-DLNIEFTVTKCTI                                              | NAAAEA[ 2]IDKYLCLLYKFKYKEVLV   | RLKQYKD                        | 712     |     |
| SEA ANEMONE | 659 | PVVSFGYKLLLEVCMKICKRFRFFQyEVTAD-----                                              | --DMEI[ 3]SDCTNCFLLFRKFKIKEVLI | KMKQFKE                        | 721     |     |
| PRIAPULA    | 668 | PVVSGLYKLLTIVLCSICSSLYQFK-AMRKNVDSQL--[ 7]DSPDAV[ 2]AEILNCFTLFKKFSKEVLV           |                                | KLKMFGR                        | 742     |     |
| ESHARK      | 668 | PLVSGFYKLLSATMKIAKKINIFYK-GVSTNTWQOCHT                                            | D-----                         | PEKACCFALFGKFGKEVTI            | RMKQYKD | 730 |
| STERLET     | 671 | PLVSGFYKLLSVMKIAKRIKYFQ-GVSPRSCKTSPS                                              | D-----                         | PDKYACFALFAKFGKEVST[ 8]RMKQYKD | 741     |     |
| COELACANTH  | 669 | PLVSGFYKLLSVMKIAKRIKYFQ-GVSSKSKQNSL                                               | D-----                         | PEKYACFALFAKFGKEVCA            | RMKQYKD | 731 |
| HUMAN       | 661 | PLISGFYKLLSITVRNAKKIKYFE-GVSPKSLKHSPE                                             | D-----                         | PEKYSFCALFVKFGKEVAV            | KMKQYKD | 723 |
| CAECILIAN   | 670 | PLISGFYKLLSVMKNAKRIKYFE-GVSPKSHKCKPK                                              | D-----                         | PERFACFALFAKFGKEVSA            | KMKQYKD | 732 |
| PLATYBUS    | 663 | PLISGFYKLLSIAIRNAKMKYFE-GVSPRSLLKXSE                                              | D-----                         | PEKYSFCALFAKFGKEVAV            | KMKQYKD | 725 |
| CANARY      | 660 | PLISGFYKLLSVMKIAKRIKYFE-DISPRSLRRPCE                                              | D-----                         | PEKSSCFALFVKFGKEVAA            | KMKQYKD | 722 |
| OSTRICH     | 631 | PLISGFYKLLSVMKIAKRIKYFE-GVSPKSLKCPSE                                              | D-----                         | PEKSSCFALFVKFGKEVTA            | KMKQYKD | 693 |
| TURTLE      | 669 | PLISGFYKLLSVMKIAKRIKYFE-GVSPKSYKCPD                                               | D-----                         | PEKSSCFALFAKFGKEVTA            | KMKQYKD | 731 |
| ALLIGATOR   | 629 | PLISGFYKLLSVMKIVKIKYFE-DVSPGTQKKYPE                                               | D-----                         | PEKSSCFALFAKFGKEVAA            | RMKQYKD | 691 |
| SOFTCORAL   | 658 | PLVSGFYKLLDVMKISRKLDFYK-GMTLKDVTSTGCV                                             | D-DMET[ 5]SDCRNCFLLFHKFAMEVVV  | RMKQYKD                        | 729     |     |
| STONYCORAL  | 670 | PVVSFGYKLLLEVCMKCKECLSFYK-NIKAEPDLKNE                                             | NLNLEI[ 3]SDCMKCFVLFHKFTKEIVV  | RMQQYKD                        | 740     |     |
| ACORN WORM  | 665 | PLVSGFYKLLSVMCTISQNIQYFQ-GINENAKVAPR[ 8]KDMCTL                                    | ADKVAAPHLKKFTKEVLI             | RLKQYKD                        | 740     |     |
| LANCELET    | 671 | PLVSGFYKLLSVMCTICTKVKYFQ-DLDTK----LLS[ 8]EGRDRP                                   | SEQQACFTLFRKFKYKEVLV           | RLKQYKD                        | 742     |     |
| SEA URCHIN  | 662 | PLVSGFYKLLSVMCTISQNIQYFQ-EVNPVNTFRTEV[ 8]DDSES[ 12]SDKQACFTLFRKFKYKEVLI           |                                | RLKQYKD                        | 749     |     |
| STARFISH    | 664 | PLVSGFYKLLTVMCMNICTQIQFFK-CIKPDSLDS----[ 8]DLNFSS[ 7]SDRCICFTLFAKFSKEVLV          |                                | RLKQYKD                        | 742     |     |
| TERMITE     | 696 | DLQVACLETVIAAPVALVPLLPHPAVAFEVIFRVGRSMLPARLGLSALDKWYCTLPS                         | HLVTPLLMQVLPYLDPPFL            | 772                            |         |     |
| SHRIMP      | 714 | ELLASCLFLIHLPLCIVQEIFPQLVSPLOALQVGSVYPLAEVFCILALQLWTKLSLQ                         | EILSEHPHVLPLLLPYL              | 790                            |         |     |
| SCORPION    | 723 | ELLASCEVILSLPTEIVSEINILIPAVQISLQLGSLPLAMSCDALETWLYSLPS                            | ELLKEHYCKLLPSLNDYF             | 799                            |         |     |
| ALVINELLA   | 691 | DLASCLFLLSLPTEIVTELHVAIPALQALQIGYSYPLANAALDALDTSWQKIPD                            | SMMKFPYTDILQYLDPYL             | 767                            |         |     |
| CAPITELLA   | 727 | DLASCLGFLLALPHEI IALDVTTFVPALORSELEIGRYSPLARTSLNTLESWSKSLPP                       | DVMKPFYEQLLPYLDAYL             | 803                            |         |     |
| SPONGE      | 735 | DLASCLHLLVLVLPKEMVSDFKELIPAIKALRIGMGLYPLAKSVMEALEKWTLYIVE[ 4]DTLQCLVNEILPDLADYL   |                                | 815                            |         |     |
| OYSTER      | 726 | DLAACLFTLITLTPKEIIAQQMSKIVPAIQLTFSVGLSYPLAEVGLDLSLVWWSQVLP                        | SVIRPFYQILPCLDSYL              | 802                            |         |     |
| SNAIL       | 722 | DLASCLTLLITLTPKEIIAQQMSKIVPAIQLTFSVGLSYPLAEVGLDLSLVWWSQVLP                        | EVLPAPHYANILPCLDSYL            | 798                            |         |     |
| TRICHOPLAX  | 712 | DLHVSCSLILALPYQLIQDDMALIIPAIKVMNIGLSYPLANAADALERSWSDLPQ                           | NIIGPYFSDILPCFDDYL             | 789                            |         |     |
| SEA ANEMONE | 723 | ELLASCLFLLSLPTEIVADVAAVPALELTPFKLGLSYPLAQAGLALEEWNASLPG                           | DVLRRLRNILPCLDGYL              | 798                            |         |     |
| PRIAPULA    | 743 | DLVACLQVLMALPYEIVDVIPEIVPAVQVALKIGLSYPPMAHTLDALEMMWANLPA                          | DVMQPYKQILPHLDGYL              | 819                            |         |     |
| ESHARK      | 731 | ELLVSCLEFVILSLPHDIIMLDIKAYIPALQAFKGLSHTPLADAGLDALEDWSAHPK                         | HIIPHYKIDILPHLDGYL             | 807                            |         |     |
| STERLET     | 742 | ELLASCLFVILSLPHDIIMLDIKAYIPALQAFKGLSHTPLANTGLYALENWSQFIPK                         | YVMQPHYKIDILPYLDGFL            | 818                            |         |     |
| COELACANTH  | 732 | ELLASCLGFLLSLPTEIVELDVKAYIPALQAFKGLSHTPLADAGLDALEEWNSRIPK                         | WVLPQYKIDILPCLDGYL             | 808                            |         |     |
| HUMAN       | 724 | ELLASCLFVILSLPHDIIMLDIKAYIPALQAFKGLSHTPLAEVGLNALEEWESIYIDR                        | HVMQPYKIDILPCLDGYL             | 800                            |         |     |
| CAECILIAN   | 733 | ELLASCLFLLSLPHDIIMLDIKAYIPALQAFKGLSHTPLADAGLDALEDWSAYIPQ                          | YVIQPHYSIILPCLDGYL             | 809                            |         |     |
| PLATYBUS    | 726 | ELLASCLFVILSLPHDIIMLDIKAYIPALQAFKGLSHTPLADAGLDALEDWSIYIPR                         | HVIQPYKIDILPCLDSYL             | 802                            |         |     |
| CANARY      | 723 | ELLASCLFLLSLPHDIIMLDIKAYIPALQAFKGLSHTPLADAGLDALEDWSAHPK                           | HMMQPYKIDVLPCLDGYL             | 799                            |         |     |
| OSTRICH     | 694 | ELLASCLFLLSLPDPDIIMLDIKAYIPALQAFKGLSHTPLADAGLDALEDWSAHPK                          | HIMQPYKIDVLPCLDGYL             | 770                            |         |     |
| TURTLE      | 732 | ELLASCLFVILSLPHDIIMLDIKAYIPALQAFKGLSHTPLADAGLDALEDWSAYIPK                         | HIMQPYKIDVLPCLDGYL             | 808                            |         |     |
| ALLIGATOR   | 692 | ELLASCLFVILSLPHDIIMLDIKAYIPALQAFKGLSHTPLADAGLDALEDWSAHPK                          | NIMQPYKIDVLPCLDGYL             | 768                            |         |     |
| SOFTCORAL   | 730 | DLKSSCLFVILSLPNEVLCDIDIIIPTLTKFVFLKGLGFLPLAEALDALDTSWTAELPS                       | EILHPYLEREVLQCLDGYL            | 806                            |         |     |
| STONYCORAL  | 741 | DLVSCLEFVILSLPTEIVLTDLVVSSVAALKLTPFKLGLSHTPLAEAGLDALESWTALPA                      | DKLKPFLREILQCLDGYL             | 817                            |         |     |
| ACORN WORM  | 741 | DLASCLFLVIALPHEI IASDVAAVPALELTPFKLGLSYPLAHAGLDALETWAFRLQH                        | NALQPYKIDILPCLDGYL             | 817                            |         |     |
| LANCELET    | 743 | DLASCLFVILSLPHDIIMLDIKAYIPALQAFKGLSHTPLADAGLDALEERWLLNLP                          | SALPHPHHILPYLDGYL              | 819                            |         |     |
| SEA URCHIN  | 750 | DLASCLFLLSLPHQVVENQVHDVPAKLPFKLGLSHTPLAEAGLDALEWIRYIP                             | DVLKPYQAQVLPCLDGYL             | 826                            |         |     |
| STARFISH    | 743 | DLASCLLVLVSLPHEIVQAEVAHLVPALELTPFKLGLSHTPLAEAGLDALEERWMLHLLP                      | DSLQPHLKVILPCLDGYL             | 819                            |         |     |
| TERMITE     | 773 | RSQGVASGDV-----IIEKELMVLGRRNRTNYSQNK--VARKKIEHPESLSQLQHEIISFLGQLDSTTCLAL          |                                | 841                            |         |     |
| SHRIMP      | 791 | RSQETGGEAEV-----HTRVITVKMAFARQRKVDQKKMKE-----SKRVEETAMQKIQMLIRLIGSLDPLLR--L       |                                | 855                            |         |     |
| SCORPION    | 800 | LASDNIISLQPLk-----NIHTFTKQSLVVKKLPKLSIQY--KKIKQTDLHESSELIKVQHRIIRLRFGLSVGNQYNFAM  |                                | 869                            |         |     |
| ALVINELLA   | 768 | KSATDTPFSA--aATDQMIILSTTKSNHFKGRRKIPKVLKQ--kRKTLSERNQESQLAEIRRRCVLLGLSGGIVNML     |                                | 844                            |         |     |
| CAPITELLA   | 814 | TSSADEKNDTl-----SLVQKDPMKKQKPKIPVLLKQ--TMFDAEKGESELEIQKRCVLLGLSGGINSNAL           |                                | 872                            |         |     |
| SPONGE      | 806 | KATSVQLKEEe-----DGGRGQYATRYARM--KMVEK--WSEGLHQSRRDITSVRRRIILLLGLSGGVNNE           |                                | 882                            |         |     |
| OYSTER      | 803 | KTMD--QGADD--vSENTM--EMNKS--GKGRKLPVRLKQ--pK--TDSKQVETQLAKVQRVMTYGLRGLGGEVNFAL    |                                | 873                            |         |     |
| SNAIL       | 799 | KTVD--TGAED--vSVETLVTVSSSKS--KYRGGKLPVRLKQ--rKPVDLDKQYESQLSVVKQKIVTYLGLSGGSMNFAL  |                                | 871                            |         |     |
| TRICHOPLAX  | 790 | KSSADDTTET---LVEDSSKALKARTGKAK---KLPVKNVNP-----TGSKDSPLAQVRLRIVQLLGRGLGNTNSLV     |                                | 856                            |         |     |
| SEA ANEMONE | 799 | KSATDAVEEE---QQQVSRRTATLRSYSLRGLKLSLYIDFvsKRNILPQVGESSLVTVIRVQLIRLLGLGGLGHTNLC    |                                | 874                            |         |     |
| PRIAPULA    | 820 | KTTE--GADS--vpT--PTVAITSANAT--RGRKKIPVLLKQ--sGRK---MAEDSALTARMRIVRFLGGLGANNISL    |                                | 887                            |         |     |
| ESHARK      | 808 | KTAAF---D---EAQNNWEGMNNINPSRKGSKVLFHHTTK---SKEFLVSEDSAITAVRRRIVRLLGLSGGQNNRSL     |                                | 876                            |         |     |
| STERLET     | 819 | KTASN---D---EEQNNWVMSLSRSTKGYGRVLMRLK---AKRFLTEDSPTALVRRRIVRLLGLGGLGQNNRSL        |                                | 888                            |         |     |
| COELACANTH  | 809 | KTSSISA---G---DTPSSWEVRLSRAAQKGDHVKVILRLK---AKAVSLNEDSSLGAVRGRVVRVLLGLSGGQNNRSL   |                                | 878                            |         |     |
| HUMAN       | 810 | KTSSALS---D---ETKNNWVSALSRAAQKGNPKVVLKHLK---TKNLSSENAISLEEIRRVVQMLGSLGGQNNKSL     |                                | 870                            |         |     |
| CAECILIAN   | 801 | KTASSA---D---EYQNSWVMSLSRAAQKGNPKVVLKHLK---TKTSLDQDVSLASIRNRVVQILGSLGGQNNQSL      |                                | 879                            |         |     |
| PLATYBUS    | 803 | KTALS---D---ETKNNWVMSLSRAAQKGNPKVVRHLK---AKATAPVEDLSLESVTRVVRVLLGLSGGQNNRSL       |                                | 872                            |         |     |
| CANARY      | 800 | KSSTST---V---ESQNNWVMSLSRAAQKGNPKVVIQRIR---AKTSLVNSPSLQAVRTRVARLLGLSGGQNNHNL      |                                | 869                            |         |     |
| OSTRICH     | 771 | KNSAST---V---EPQNNWVMSLSRAAQKGNPKVVIQHLRR---AKT--SLVGDPSLEAVRTRVARLLGLSGGQNNHNL   |                                | 839                            |         |     |
| TURTLE      | 809 | KTGSA---D---ESQNNWVMSLSRAAQKGNPKVVIQHLRR---AKTSLDNLSEAVRTRVVRVLLGLSGGQNNRNL       |                                | 878                            |         |     |
| ALLIGATOR   | 769 | KTATSP---D---EFQNNWVMSLSRAAQKGNPKVVIQHLRR---AKALSLNEDLSLEAMSRVVQILGSLGGQNNRSL     |                                | 838                            |         |     |
| SOFTCORAL   | 807 | KTASEL---ET---SNEKETLRSRKSQKTKA---SKS--SKRNPEEN--SPLNKVHRILILLGLGGLGKCNLGL        |                                | 870                            |         |     |
| STONYCORAL  | 818 | TLGLDI---QL---HNECNTIVLITSSHTSRGKRLPLKLLK---KPSQSQMTELTPLAKVRKILRMFGLGGETNILL     |                                | 889                            |         |     |
| ACORN WORM  | 818 | KTVSDTNAEN--asS--QTVSLTMTRTG--KRRNKIPRLKLP--aTQD--GS--DESPITIVLKIIVHLLGLLGGSTNGYL |                                | 887                            |         |     |
| LANCELET    | 820 | QTAADTGSSS--ssDGFQTVSLTAASS--RGRKKIPVLLKLA--aAER--NQVQESDLVKARLIRVRLGLSGGLGHTNACL |                                | 892                            |         |     |
| SEA URCHIN  | 827 | GAG--SGSED--egSRPEVLVQTASS--RGRRRIPSKLLK--aKDN--DQSDPSLRSVQLIRLIRLLGLSGGQNNVGL    |                                | 897                            |         |     |
| STARFISH    | 820 | RGTI--TQGS--aadVVQTVTMASASSGRAGKRLPAKLKIG--aSTT--CQTQDPSLRSVQLIRLIRLLGLSGGQNNAYL  |                                | 893                            |         |     |

Supplementary Figure 3: DNA-PKcs COBALT Metazoa Vertebrate Invertebrate

|             |      |                                                                                     |      |
|-------------|------|-------------------------------------------------------------------------------------|------|
| TERMITE     | 842  | LKDPQQ-EED---VIPWATCLqqPLVFPPLPFKDMKLNINLEKLIIPRVVELAMTSSDRYTRFTACELLHGI VMLILGSGQE | 917  |
| SHRIMP      | 856  | HTIPQDpDTIASAAVRWNVQK1--VKFATPFHEHKID IYLDLPHVVDLAVNSSDRQTKVAASELLHSI IILMI GTGAQ   | 933  |
| SCORPION    | 870  | ISA-DK-IKIHVEVAWVDINKqHLKFLYLPIDVKLEIFLDKFLPRIVLSTASQRTKVAACELLHAVVTFMVGGCAQ        | 947  |
| ALVINELLA   | 845  | VKSSTE--QVTKSAMAWDNVK--HLKFHVFPVDIKPVIYLDVFLPRVVEIATTSSECQTKAAACELLHSFVLYMLGRSSQ    | 920  |
| CAPITELLA   | 873  | VFGQTA--NPPDLVAWDSQD--HLKFDLPFLDIKTPIYFDALPKVVTLATVSSDRQTKVAACELLHSLVLLMLGRSSA      | 947  |
| SPONGE      | 883  | SKVPS----QHSLVSWSDSR--RLGFVFPFDLKEIYLDPLPVTVCCELALSSSDRQTKVAACEFLHAAMLVFIKGTQ       | 955  |
| OYSTER      | 874  | LSG----SDVCEAIWADEAQ--HLRFDPVFPMDMKPIYDFPFLPRIVELATKSGDRQTKVAACELLHSLILLCVGRSAT     | 947  |
| SNAIL       | 872  | LAR-RE-EEISRRAIWADTEQ--HLRFDIPFDMKPSIYDFPFLPHVVELATQSSNRQTKVSAACELLHSLILYTLGRSAQ    | 947  |
| TRICHOPLAX  | 857  | IRKGN-DGS-SQAVAWDNHK--RLPFAIPFQDMKPIIHLDPFLPRVVELATSSDRQTKIAACELLHALVLYMLGRGAQ      | 932  |
| SEA ANEMONE | 875  | LGSDDG-VDS-GSAVAVDTPV--HLPFAVFPQDMKPIYLDVFLPRVVELATSSNRQTKVAACELLHSLVLYMLGKGV       | 950  |
| PRIAPULA    | 888  | ISC-DA-EDIKAVVAWDAEK--NLKFGVFPDMKPIYDFVFLPRVTDLALSSSDRQTKVACELLHALLLYILGTGAQ        | 963  |
| ESHARK      | 877  | VTAVSA-EEMMKRCIAWVTEK--PLSFVFPFMDMKPIIYLDSPFIPRISELALSASDRQTKVAACELLHSVAYTLGKGSQ    | 953  |
| STERLET     | 889  | VTATSA-EEMMKKFAVDSEK--RLNFAVFPDMKPIYLDLFLPRITELALSTNDRQTKVAACELLHSVVFMFLGKGSQ       | 965  |
| COELACANTH  | 879  | VTAAS-EEMMKKFAVSDTEK--RLSFVFPFMDMKPIYLDVFLPRVVELATSSDRQTKVAACELLHSVVVYMLGKGSQ       | 955  |
| HUMAN       | 871  | LVTSS--DEMMKSVAVDREK--RLSFVFPFDMKPIYLDVFLPRVTEALATASDRQTKVAACELLHSMVMFMLGKATQ       | 947  |
| CAECILIAN   | 880  | VTASCA-EEMMKKFAVSDTEK--RLSFVFPFMDMKPIIYLDVFLPRVTEALATSSDRQTKVAACELLHSMVVYMLGKASQ    | 956  |
| PLATYBUS    | 873  | VTAASA-DEMMKCVAVDTEK--RLSFVFPFMDMKPIYLDVFLPRITELALSASDRQTKVAACEVLSI VFMFLGKASQ      | 949  |
| CANARY      | 870  | VTATSA-EEMMKKCVSDTEK--HLSFVFPFMDMKPIYLDLFLPHVTEALALSASDRQTKVAACEVLSI VTYMLGKASQ     | 946  |
| OSTRICH     | 840  | VTATSA-EEMMKKCVSDTEK--HLSFVFPFMDMKPIYLDLFLPRVTEALALSASDRQAKVAACEVLSI VAYMLGKASQ     | 916  |
| TURTLE      | 879  | LTAAS-EEMMKKFAVSDTEK--HLSFVFPFMDMKPIYLDLFLPRVTEALALSASDRQTKVAACEVLSI VMYMLGASQ      | 955  |
| ALLIGATOR   | 839  | VTAAE-EEMMKKFAVSDSEK--HLNFAVFPDMKPIYLDLFLPRVTEALALSASDRQTKVAACEVLSI VMLGKASQ        | 915  |
| SOFTCORAL   | 871  | LEGGEG-SVA-SSGIWADTKQ--HLSFVFPFMDMKPIYLDLFLPRVVELATSSDRQTKVAASEVPHSLVFLMLGKSVQ      | 946  |
| STONYCORAL  | 890  | LNDTG--INS-SNAVVDWTEK--HLTFVFPFMDMKPIYLDLFLPRVVELAASDRQTKVAACEVLSI VHYMLGKSVT       | 964  |
| ACORN WORM  | 888  | LES-SK-EEIAKKA VAWDTEK--HLQFPVFPMDMKPIYLDLFLPRVVELATSSDRQTKVAACEVLSI VLYMLGKGSQ     | 963  |
| LANCELET    | 893  | VTGLTA-EDLAKRAVAVDTPQ--HLQFAVFPMDMKPIYLDLFLPRVTEALATSSDRQTKVAACEVLSI VLYMLGKGSQ     | 969  |
| SEA URCHIN  | 898  | LET-SA-QEELNVAWDSQP--RLNFPVFPDMKPIYLDLFLPRVTEALATSSDRQTKVAACEVLSI VLYMLGKGSQ        | 973  |
| STARFISH    | 894  | LET-SA-EEIAKVA VAWDTPQ--RLQFAVFPDMKPIYLDLFLPRVTEALATSSDRQTKVAACEVLSI VLYMLGKGSQ     | 969  |
| TERMITE     | 918  | AQT--SHP-DKYSLEFRKLSLPLLLKGCDDPDAIHRLLNLLVLQVHVYSSKFKLKSKEVEILIQTLMDGITHTPTDIALR    | 994  |
| SHRIMP      | 934  | KSQETQLK-EPMYLYRHLFSAMLRLACDPDHDVTRQLFLTLSTYQTIHWFTNRRNFENVDIMVLEALMEGIVTANDPALR    | 1012 |
| SCORPION    | 948  | QQPELQAI-YSMKKLYKNVLPALLQLACDVEVARKLFEPPTFQLIHWFTTKRMINSDETKQFVQVIWDLGVQSKDAVFR     | 1026 |
| ALVINELLA   | 921  | QPKTKAARgEMDKLYQKLFVPLLQLACDTEQVARGFPLVMQLIHWFTSVMFQSGEGTKILLECIMDGLVDPNTALR        | 1000 |
| CAPITELLA   | 948  | QPT---G-PMMAAIYRKLFPQMLKLA TDVQVSRQLFPEPLMLQI IHWFTKSNNSHRPDEALLNSLMDGIVSPSDSAVR    | 1022 |
| SPONGE      | 956  | QSV---QKK-NPMTKLYQKLPVALLQLACDVRVAEQLFRPLVQMIHWFTTRNTQYESPDTVTLLAEALLEGIEHPTNASLR   | 1032 |
| OYSTER      | 946  | QPA--RER-YSMAPLYKMFPSILQLACDVPDLVTQQLFEPLVQLIHWFTGNKNKAES EESMALLDAIYDGIQPNDTALR    | 1024 |
| SNAIL       | 948  | QPGEIQRK-NPMDLSYRKLFPALLSLSCDVEQVCRQLFEPLVQKLIHWFTGNKNKAES PESMALLDSIFDGLVQQDNTMLR  | 1026 |
| TRICHOPLAX  | 933  | QDGGTGSV-TYGNLYKRIIPALLTLASDVEQVSQLFQPLVQYLIHWFTGNSNYESVETIALLNALLDGVIHSTDSALR      | 1011 |
| SEA ANEMONE | 951  | QPDGKKA-LPMQNLWKLIIPVLLQLACDVEQVSRQLFPEPLVQKLIHWFTNRRKYESPETIALLDALLEGVHPTDTSLR     | 1029 |
| PRIAPULA    | 964  | QDSTKSK-RPMSALYSRFLPVLRLQLACDVEQVAVQQLFEPLVQMIHWFTNRRMFESPETMCLLDAIMEGIVDATDAALR    | 1042 |
| ESHARK      | 954  | ISEGQQ---ETFLYKLNRLFPVLLRLGCDVDTVTRQLFEPLVQKLIHWFTSNRRKYES EESMALLDAIYDGIQPNDTALR   | 1030 |
| STERLET     | 966  | IPERGEKST-PPMYRKYRIFPVLLRLACDVDQVTRQLYEPLVQKLIHWFTNRRKYESQDVTAMLEAILDGVIVDPVDTSLR   | 1044 |
| COELACANTH  | 956  | IPERCGGV-PPMYRKYRIFPVLLRLACDVDQVTRQLYEPLVQKLIHWFTNRRKYESQDVTAMLEAILDGVIVDPVDTSLR    | 1034 |
| HUMAN       | 948  | MPGEGQA-PPMYQLYKRIFPVLLRLACDVDQVTRQLYEPLVQKLIHWFTNRRKYESQDVTAMLEAILDGVIVDPVDTSLR    | 1026 |
| CAECILIAN   | 957  | MPKQDQL-PPMYQLYKRIFPVLLRLACDVDQVTRQLYEPLVQKLIHWFTNRRKYESQDVTAMLEAILDGVIVDPVDTSLR    | 1035 |
| PLATYBUS    | 950  | IPGNGQS-PPMYQLYKRIFPVLLRLACDVDQVTRQLYEPLVQKLIHWFTNRRKYESQDVTAMLEAILDGVIVDPVDTSLR    | 1028 |
| CANARY      | 947  | MPGCGQP-PPMYHLKRVFPVLLRLACDIDQVARQLYEPLVQKLIHWFTNRRKYESQDVTAMLEAILDGVIVDPVDTSLR     | 1025 |
| OSTRICH     | 917  | MPGCGQP-PPMYQLYKRIFPVLLRLACDVDQVTRQLYEPLVQKLIHWFTNRRKYESQDVTAMLEAILDGVIVDPVDTSLR    | 995  |
| TURTLE      | 956  | MPDGGQA-PPMYQLYKRIFPVLLRLACDVDQVTRQLYEPLVQKLIHWFTNRRKYESQDVTAMLEAILDGVIVDPVDTSLR    | 1034 |
| ALLIGATOR   | 916  | MPGGRQS-PPMYQLYKRIFPVLLRLACDVDQVTRQLYEPLVQKLIHWFTNRRKYESQDVTAMLEAILDGVIVDPVDTSLR    | 994  |
| SOFTCORAL   | 947  | IPDASSQS--PLEKLKRVFPVLLQLACDVEQVSRQLFPEPLVQKLIHWFTNRRKYESPDTIILLETLLDGIHPTDTSALR    | 1024 |
| STONYCORAL  | 965  | QPQGFKS--PMEHLKRVFPVLLQLACDVEQVSEQLFKPLVQKLIHWFTNRRKYESPDTMALLDAIYDGIHPTDTSALR      | 1042 |
| ACORN WORM  | 964  | QDSTQAR-APMEKLYKRVLPALLQLSCDVEQVARGQLFPEPLLSQLIHWFTNRRKYESPETIALLDAIYDGIHPTDTSALR   | 1042 |
| LANCELET    | 970  | QPGEMQK-NPMTRLYKRVFPVLLQLACDVEQVARGQLFPEPLVQKLIHWFTNRRKYESPETIALLDAIYDGIHPTDTSALR   | 1048 |
| SEA URCHIN  | 974  | QDQREAR-SPMQLYKRVFPVLLQLACDVEQVARGQLFPEPLVQKLIHWFTNRRKYESDETSLLNAILAGVHPTDTSALR     | 1052 |
| STARFISH    | 970  | QPQRQAK-SPMQLYRVPVLLRLACDVEQVARGQLFPEPLVQKLIHWFTNRRKYESDETTALLNAILAGVHPTDTSALR      | 1048 |
| TERMITE     | 995  | DFSARCLHEFVWSVKQ-----SHVNIKVMKQIYSFCLHPCSKRLGAALVLSVYTVLREEESVNVQFWLELLYH           | 1067 |
| SHRIMP      | 1013 | DVSAQCLAEFVWKRQCC--RQNSVSNIKSI IKRIFSFCKHPSAFKRLGALAWNSIYREIREDDQAVD IWTLLLAH       | 1090 |
| SCORPION    | 1027 | DFSARCLREFVQWSIKQTSVREQEENPIGMNVNLCLNYSLHPNPKYRLLGALAFNSIYTFREEESLVDKFTLEIAVH       | 1106 |
| ALVINELLA   | 1001 | DFSALCVHEFLQWAIKQTTKKQLESSPNVEMLMNWIYNLARHPSAFKRLGASLAFNSIYTFREEDSLVDIFTFEIMVV      | 1080 |
| CAPITELLA   | 1023 | DFSACIREFLAWSIKQTSPEKMEAGANPKRLLKRMYSLEBHPSSMRLGALAFNSIYVSVFREDALVDQFSLQILSV        | 1102 |
| SPONGE      | 1033 | DPSAQCIKEFLVWSIKQTSKQKERSPNTKSLKRLYSALHPSAGHPSAKRLLGALAFNSIYTVLREEESLVDVFIIEILVV    | 1112 |
| OYSTER      | 1025 | DFCAVCLREFLKWSIKQTT--KNVEKSPINAKSLKRLYSALHPSAFKRLGALAFNSIYTVFREDNAMVNLVTFQILVH      | 1102 |
| SNAIL       | 1027 | DFAAQCLREFLKWSIKQTSKAMEETNPRNVTSLKRMQSFALHPSAFKRLGALAFNSIYVMVFREEQSLVDRTFQILVL      | 1106 |
| TRICHOPLAX  | 1012 | DFCAKSLREYLHWSIKQTTKKQEKSTNNAKSLKRLYSALHPSAFKRLGALAFNSIYVVLREEESTLVDTFIFEILVN       | 1091 |
| SEA ANEMONE | 1030 | DPSAQCIREFLQWSIKQTSKQLEKSPINIKSLKRLYSALHPSAFKRLGALAFNSIYTVFREDSLVDVFIIEILVT         | 1109 |
| PRIAPULA    | 1043 | DFCGCIREFLIWSIKQTTVRRQERSPNTKSLKRLYSALHPSAAKRRGATLVFNPIYTVLREEEMLVDTFIIEILVT        | 1122 |
| ESHARK      | 1031 | DFCGCVREFLKWSIKQTTPEQQAESPANTKSLFKRLYSALHPSAFKRLGALAFNSIYREFREESALVDQFIFEVLVV       | 1110 |
| STERLET     | 1045 | DFCGCQREFLQWSIKQTTTPKQEKSPANTKSLFKRLYSALHPSAFKRLGALAFNSIYRQFREESTLVDQFIFEILLVI      | 1124 |
| COELACANTH  | 1035 | DFCGLCIQEFLKWSIKQTTTPKQEKSPANTKSLFKRLYSALHPSAFKRLGALAFNSIYKREFREESALVDKVFVFEALVV    | 1114 |
| HUMAN       | 1027 | DFCGCIREFLKWSIKQITPQQEKSPVNTKSLFKRLYSALHPSAFKRLGALAFNSIYREFREESLVEQVFVFEALVI        | 1106 |
| CAECILIAN   | 1036 | DFCGHCIREFLKWSIKQITPQQEKSPVNTKSLFKRLYSALHPSAFKRLGALAFNSIYREFREESLVEQVFVFEALVV       | 1115 |
| PLATYBUS    | 1029 | DFCGCQVREFLKWSIKQTTPEQQAESPVNTKSLFKRLYSALHPSAFKRLGALAFNSIYREFREESLVDQFIFEALVI       | 1108 |
| CANARY      | 1026 | DFCGCQIREFLKWSIKQTTTPRQEEESPANTKSLFKRLYSALHPSAFKRLGALAFNSIYREFREESLVEQVFVFEALVV     | 1105 |
| OSTRICH     | 996  | DFCGCQVREFLKWSIKQTTTPKQEKSPVNTKSLFKRLYSALHPSAFKRLGALAFNSIYREFREESLVEQVFVFEALVV      | 1075 |
| TURTLE      | 1035 | DFCGCQVREFMKSQIKQTTTPQQEKSPVNTKSLFKRLYSALHPSAFKRLGALAFNSIYREFREESLVEQVFVFEALVV      | 1114 |
| ALLIGATOR   | 995  | DFCGCQIREFLKWSIKQTTTPQQEKSPVNTKSLFKRLYSALHPSAFKRLGALAFNSIYREFREESLVEQVFVFEALVI      | 1074 |
| SOFTCORAL   | 1025 | DLSALALEEFLRWSIKQATKQLEKSPINIKSLFKRLYSALHPSAFKRLGALAFNSIYRVFREESLVENFTIEILVT        | 1104 |
| STONYCORAL  | 1043 | DPSAQCIREFLQWSIKQTSKQEKSPINIKSLKRLYSALHPSAFKRLGALAFNSIYTVFREESLVDIFVLEILVN          | 1122 |
| ACORN WORM  | 1043 | DPSACVREFLQWSIKQTSKQTEKSPINIKSLKRLYSALHPSAFKRLGALAFNSIYTVVREESLVDQFVLEILVI          | 1122 |
| LANCELET    | 1049 | DFSSRCVREFLQWSIKQTTTPKQEKSPINIKSLKRLYSALHPSAFKRLGALAFNSIYRDFREESLVDQFVLEILVI        | 1128 |
| SEA URCHIN  | 1053 | DFCARCISEFLRWSIKQTSKQEKSPINIKSLKRLYSALHPSAFKRLGALAFNSIYTFREEESLVDQFIFEILLVV         | 1132 |
| STARFISH    | 1049 | DPSACCLREFLKWSIKQTSKQEKSPINIKSLKRLYSALHPSAFKRLGALAFNSIYTVFREESLVDQFVLEILVT          | 1128 |

Supplementary Figure 3: DNA-PKcs COBALT Metazoa Vertebrate Invertebrate

|             |      |                                                                                       |      |
|-------------|------|---------------------------------------------------------------------------------------|------|
| TERMITE     | 1068 | MVMNLSLSEETDSILGGQEVVAVNHIERVLKEKASLFN--KEDNIRRKPEFEG---ILLKDAVSWLLKCGTVQVEC          | 1142 |
| SHRIMP      | 1091 | LMTSLDLAQVDDPALGTHTQTKSAINHIERIIRVKSDLFQ--KKSQRRLPPGFGDGT---LVDVLKWLFPQCGRPKALV       | 1165 |
| SCORPION    | 1107 | FIESLAIHAYDDKILGTQDKCKQALNHLIERIMEVKAALLS--KTSKRRRLPRNINDS---ILPEVVEWILKNCGLQTEC      | 1181 |
| ALVINELLA   | 1081 | FVESLAIHAGDDKSLGTQKQAKQALSHLDRIIKKADLLS--CASKRRKPKYKWEAT---LQICLWLVRQCGRPQTEC         | 1155 |
| CAPITELLA   | 1103 | LVNSLALAHRRDCKSLGTQEQCKSALLHVERILIKKQVTFN--KDSQRIRKPRGRDAN---MTTAVRWLLRQCGRPQTEC      | 1177 |
| SPONGE      | 1113 | MVNSLKLAKHQDAQSIGTVQCCSLSDHMSRIIKAKSSTCLsKANKNRVPRGLKASAD---LSILTAWLLAQCGSIETEA       | 1188 |
| OYSTER      | 1103 | FVESLAIHAEDESSMGTTQCKMVLDMHMERIKKKNVLS--KEDKNRTEPKQVSW---VKLDIAVRWLMRQCGRPQTEC        | 1177 |
| SNAIL       | 1107 | FVESLGIHAGDEASLGTQEQCKKALEHVEKIVCKRVDILR--KPSPHRKEPSEWSK---QTLDIIVRWLVRQCGRPQTEC      | 1181 |
| TRICHOPLAX  | 1092 | YVNSLALSHTDEKSLGTQEQLSKALAHIERIKKASTLN--KESKNRRTPTGFMT--K-TVTLHHVWNWLVQCGRPQTEC       | 1168 |
| SEA ANEMONE | 1110 | YLESLALAHHTDDPAQGTQEQCSQVISHLERIKTKATLLD--KENQRRIIPRGFQMLD-SITLSSHLLPLLIKLQCGRPQTEC   | 1187 |
| PRIAPULA    | 1123 | FVDSLALAHNDKESLGTQEQCAQALDHIERILRGAHLLN--KDKKSRRRPKEFTD---ATLFTTVGWLLQCGRPQTEC        | 1197 |
| ESHARK      | 1111 | YVESLALAHADNDSLGTQVQCCDAIDHLNRIIKQKASALN--KPIKGRVPRGFPPDQ--PVSLKEVVMWLLTQCGRPQTEC     | 1187 |
| STERLET     | 1125 | FVESLALAHHTDEKSLGTQEQCCDAIDHLKRIIKKASALN--KAKKRRRPRGFPDQ--PVCLLDVIMWLLVQCGRPQTEC      | 1203 |
| COELACANTH  | 1115 | YVESLALAHHTDEKSLGTQEQCCDAIDHLKRIIKKASALN--KAAKTRVPRGFSPDK--VFCVLDVIMWLLVQCGRPQTEC     | 1191 |
| HUMAN       | 1107 | YVESLALAHADKESLGTQEQCCDAIDHLKRIIEKKSALN--KAKKRRRPRGFPDQ--SLCLLDLVKWLHACGRPQTEC        | 1183 |
| CAECILIAN   | 1116 | YLESLALSHQDEKSLGTQEQCCDAIDHLKRIIHKKAPSLN--KTLKRRRPRGFPSTKsSFCVLDVIMWLLVQCGRPQTEC      | 1193 |
| PLATYBUS    | 1109 | FVESLALAHHTDEKSLGTQEQCCDAIDHLKRIIEKKSALN--EENKRRRPRGFPNAR--SVRLLDVIMWLLVQCGRPQTEC     | 1185 |
| CANARY      | 1106 | FVESLALAHHTDEKSLGTQEQCCDAIDHLKRIIHKKAPSLN--KEGKRRVPRGFPPTK--SVCLLDVIMWLLVQCGRPQTEC    | 1182 |
| OSTRICH     | 1076 | FVESLALAHHTDEKSLGTQEQCCDAIDHLKRIIEKKSALN--RAGERRVPRGFPAK--TVCLLDVIMWLLVQCGRPQTEC      | 1152 |
| TURTLE      | 1115 | YLESLALAHHTDEKSLGTQEQCCDAIDHLKRIIHKKAPSLN--KAEKRRRPRGFPNAR--SVCLLDVIMWLLVQCGRPQTEC    | 1191 |
| ALLIGATOR   | 1075 | FVESLALHTHTDEKSLGTQEQCCDAIDHLKRIIHKKAPSLN--KAEKRRRPRGFPQAE--SLCLLDVIMWLLVQCGRPQTEC    | 1151 |
| SOFTCORAL   | 1105 | YLESLEMAHEDEISLGTQEQCEVISHLERIIVSKAPSVLL--NVNKKRRVPRGFSA--D-TTTLRHLIPWLVKCGCQTEC      | 1181 |
| STONYCORAL  | 1123 | YLECCLSHGDEEARGTQEQCVIHLIERIHSRAQLLV--KENHRRRIPRGFASQ--SITLIHMIPLWLVKCGRPSSEC         | 1200 |
| ACORN WORM  | 1123 | YNSLALAHHTDEKSLGTQEQCVRVVDHLIERIKKAPSLN--RTSKTRRVRPRFNRRD--CPTLSHVTVWLLVQCGRPQTEC     | 1200 |
| LANCELET    | 1129 | FVESLALAHHTDEKSLGTQEQCVAVLTHLDIRITKADLLN--KHSKRRRPRGFDRES--PPTLPDLVTVWLLVQCGRPQTEC    | 1206 |
| SEA URCHIN  | 1133 | FVESLALAHHTDEKSLGTQEQCVSEVLKHLIERIMRVKAPSLN--KESKNRVRPRGLPDC--SPTLSHMVWLLVQCGRPQTEC   | 1210 |
| STARFISH    | 1129 | FVNSLALAHHTDEKSLGTQELHGVVNLHLIERIKKADMLN--KESKIRRIIPREFPAGV--CPTLSMLVIMWLLVQCGRAQTEC  | 1206 |
|             |      |                                                                                       |      |
| TERMITE     | 1143 | RHKCMELVYVLA---PLLVPCKSGSEFVSWAATHSw---TSIIRICEGSKES----GGIT-VTPTLKHRLNEVALVYVV       | 1211 |
| SHRIMP      | 1166 | RHTCMELLASLA---PQVKGCAVSRDFIEKYVWYVTSKIL--SEIVDILEGGGEA--KMGISYVK---NPTASSKHIGSSLDKIN | 1237 |
| SCORPION    | 1182 | RHKCMELVYVLA---PCLSGFNGCKDYFSLHLETKGK--KFFLNCFESEMSN-----TVPSFNQNDGLKPII              | 1243 |
| ALVINELLA   | 1156 | RHACMELVYVLSstS---LPGVKRPHDFPSALIKGDKK---YLLQRFESGMYCLKEEQHGIS--KRPKVTDMDCRFALKSAL    | 1228 |
| CAPITELLA   | 1178 | RHVCMLRVYVLA---PCVHEINGARELFSVLLSQGNS--EYFIQRFEFGMYS--SARMGLN--QKPTMSRVQENFSLNAVL     | 1249 |
| SPONGE      | 1189 | RKMCRLVYVLA---PPSSNVNIRMWIRKTYIESEGG---NYFVTRFESHGHS-----GIL--KAPTLPAP---NINIAI       | 1253 |
| OYSTER      | 1178 | RHACMLVYVLA---PCITGIKSTKDYFQFTYKESG---ASYFINRFEFGKQO---KYGLL--SCPEMTAVDSSFSVQNAV      | 1246 |
| SNAIL       | 1182 | RHACMLVYVLA---PLIPGISPPDYFKAALDIQN--ASYFVVRFEFGGQV--GDRGGLC--GHPTPSKVAENFSLKAVL       | 1253 |
| TRICHOPLAX  | 1169 | RHQCMLVYVLA---PQLSGVSTIQDWKTIIGSSS---VTFITRFEFGGGS---KY--GIG--RYQTALDISDTPNLRSMK      | 1237 |
| SEA ANEMONE | 1188 | RHQCMLVYVLA---PLLHGIGSAIWMKNTHK--EH--DSFFVRRFEFGGGR--GN---GIL--TYP--TLADMGAFFSLKETL   | 1256 |
| PRIAPULA    | 1198 | RHKCMELVYVLA---PQVKGCAVSRDFIEKYVWYVTSKIL--SEIVDILEGGGEA--KMGISYVK---NPTASSKHIGSSLDKIN | 1237 |
| ESHARK      | 1188 | RHKCMELVYVLA---PQVKGCAVSRDFIEKYVWYVTSKIL--SEIVDILEGGGEA--KMGISYVK---NPTASSKHIGSSLDKIN | 1237 |
| STERLET     | 1204 | RHKCMELVYVLA---PQVKGCAVSRDFIEKYVWYVTSKIL--SEIVDILEGGGEA--KMGISYVK---NPTASSKHIGSSLDKIN | 1237 |
| COELACANTH  | 1192 | RHKCMELVYVLA---PQVKGCAVSRDFIEKYVWYVTSKIL--SEIVDILEGGGEA--KMGISYVK---NPTASSKHIGSSLDKIN | 1237 |
| HUMAN       | 1184 | RHKCMELVYVLA---PQVKGCAVSRDFIEKYVWYVTSKIL--SEIVDILEGGGEA--KMGISYVK---NPTASSKHIGSSLDKIN | 1237 |
| CAECILIAN   | 1194 | RHKCMELVYVLA---PQVKGCAVSRDFIEKYVWYVTSKIL--SEIVDILEGGGEA--KMGISYVK---NPTASSKHIGSSLDKIN | 1237 |
| PLATYBUS    | 1186 | RHKCMELVYVLA---PQVKGCAVSRDFIEKYVWYVTSKIL--SEIVDILEGGGEA--KMGISYVK---NPTASSKHIGSSLDKIN | 1237 |
| CANARY      | 1183 | RHKCMELVYVLA---PQVKGCAVSRDFIEKYVWYVTSKIL--SEIVDILEGGGEA--KMGISYVK---NPTASSKHIGSSLDKIN | 1237 |
| OSTRICH     | 1153 | RHKCMELVYVLA---PQVKGCAVSRDFIEKYVWYVTSKIL--SEIVDILEGGGEA--KMGISYVK---NPTASSKHIGSSLDKIN | 1237 |
| TURTLE      | 1192 | RHKCMELVYVLA---PQVKGCAVSRDFIEKYVWYVTSKIL--SEIVDILEGGGEA--KMGISYVK---NPTASSKHIGSSLDKIN | 1237 |
| ALLIGATOR   | 1152 | RHKCMELVYVLA---PQVKGCAVSRDFIEKYVWYVTSKIL--SEIVDILEGGGEA--KMGISYVK---NPTASSKHIGSSLDKIN | 1237 |
| SOFTCORAL   | 1182 | RHKCMELVYVLA---PQVKGCAVSRDFIEKYVWYVTSKIL--SEIVDILEGGGEA--KMGISYVK---NPTASSKHIGSSLDKIN | 1237 |
| STONYCORAL  | 1201 | RHKCMELVYVLA---PQVKGCAVSRDFIEKYVWYVTSKIL--SEIVDILEGGGEA--KMGISYVK---NPTASSKHIGSSLDKIN | 1237 |
| ACORN WORM  | 1201 | RHKCMELVYVLA---PQVKGCAVSRDFIEKYVWYVTSKIL--SEIVDILEGGGEA--KMGISYVK---NPTASSKHIGSSLDKIN | 1237 |
| LANCELET    | 1207 | RHKCMELVYVLA---PQVKGCAVSRDFIEKYVWYVTSKIL--SEIVDILEGGGEA--KMGISYVK---NPTASSKHIGSSLDKIN | 1237 |
| SEA URCHIN  | 1211 | RHKCMELVYVLA---PQVKGCAVSRDFIEKYVWYVTSKIL--SEIVDILEGGGEA--KMGISYVK---NPTASSKHIGSSLDKIN | 1237 |
| STARFISH    | 1207 | RHKCMELVYVLA---PQVKGCAVSRDFIEKYVWYVTSKIL--SEIVDILEGGGEA--KMGISYVK---NPTASSKHIGSSLDKIN | 1237 |
|             |      |                                                                                       |      |
| TERMITE     | 1212 | RWLRMVLTSFDCYVWLFGEELVKPSVLWGTEGLDNTSETRIFEAAVYFIQHVCHRDASSVTCLLST---dtKDVLEITP       | 1287 |
| SHRIMP      | 1238 | IFLEALSASLDGYCWLIGQIVPAKLLNHSSEL---QLFSATYFINEMALLTVSEYMKNHDAf-----QNAVATP            | 1305 |
| SCORPION    | 1244 | NWLEGLHTMLDCYVWVFGQSVLKLSDIFNDASN--RES--KFFPSIEFFLKTLCI--DFDQVQAFPT---hesVKKQIFSP     | 1316 |
| ALVINELLA   | 1229 | TWFDYLLCTLDYTWIFQGLNINPSRILVVPDE--KGT--VLFVLSYFFDKLAQGDIEKAAVLFQDk-----PQQIFTP        | 1299 |
| CAPITELLA   | 1250 | TWFDVLAALDCYTWVFGRLMSPNQILIASNN--KGT--IIFQVLLHFMELAQEDIISAAVLFPKv-----aDGSSIFTP       | 1322 |
| SPONGE      | 1254 | NWLQSLQAADVNRWLLKEQYVSPREIFSSSTSS---S-NLFKSIDHFLKCIALVIGEVNPSPEV-----AMATSI           | 1320 |
| OYSTER      | 1247 | SWFDHYLAALDCYIWFVGSLLNPDIF--SGEG--RQGS--KLLQAMQHFLSVQVMDMDEVGKMFRR---epL--TDVYTP      | 1318 |
| SNAIL       | 1254 | SWFDMLAVLDCYCWVFGGLSPAKMF--ESSG--FKGT--RVFSLQYVFTEMALGLDLSVAAKQFQR---kaE--AVFPTP      | 1325 |
| TRICHOPLAX  | 1238 | NWYDYFLAALDCYVWVFGKMMSPQIIGD--KaQLGSC--KIFGSIEFPLSKLCHSLDTEVKLLYS---kSTLQFTP          | 1310 |
| SEA ANEMONE | 1257 | LWFDHYLAALDCYTWVFGQLLPADLLRS---KYSS--VLFVLSYFSLNLAALGIQAIAKCPK---tHITDVTAP            | 1327 |
| PRIAPULA    | 1270 | SWFDHMLAALDCYTWVFSKLLQPTALFAGGTG--KREEt--TCFAMVSDFMPSGEERRRRRWADR---h---VHP           | 1338 |
| ESHARK      | 1261 | QWMDMLAALDCYNTFVRLAMVKSPELLT---SQET--GFMKAMNFFLKTARHDIATAEBCFTL--G---VKGVLFSF         | 1330 |
| STERLET     | 1277 | QWMDMLAALDCYNTFVRLAMVKSPELLT---SQET--GFMKAMNFFLKTARHDIATAEBCFTL--G---VKGVLFSF         | 1330 |
| COELACANTH  | 1265 | QWMDMLAALDCYNTFVRLAMVKSPELLT---SQET--GFMKAMNFFLKTARHDIATAEBCFTL--G---VKGVLFSF         | 1330 |
| HUMAN       | 1255 | CWLDLALLAALDCYNTFVRLAMVKSPELLT---SQET--GFMKAMNFFLKTARHDIATAEBCFTL--G---VKGVLFSF       | 1330 |
| CAECILIAN   | 1267 | QWMDMLAALDCYNTFVRLAMVKSPELLT---SQET--GFMKAMNFFLKTARHDIATAEBCFTL--G---VKGVLFSF         | 1330 |
| PLATYBUS    | 1259 | QWMDMLAALDCYNTFVRLAMVKSPELLT---SQET--GFMKAMNFFLKTARHDIATAEBCFTL--G---VKGVLFSF         | 1330 |
| CANARY      | 1256 | QWMDMLAALDCYNTFVRLAMVKSPELLT---SQET--GFMKAMNFFLKTARHDIATAEBCFTL--G---VKGVLFSF         | 1330 |
| OSTRICH     | 1226 | QWMDMLAALDCYNTFVRLAMVKSPELLT---SQET--GFMKAMNFFLKTARHDIATAEBCFTL--G---VKGVLFSF         | 1330 |
| TURTLE      | 1265 | QWMDMLAALDCYNTFVRLAMVKSPELLT---SQET--GFMKAMNFFLKTARHDIATAEBCFTL--G---VKGVLFSF         | 1330 |
| ALLIGATOR   | 1225 | QWMDMLAALDCYNTFVRLAMVKSPELLT---SQET--GFMKAMNFFLKTARHDIATAEBCFTL--G---VKGVLFSF         | 1330 |
| SOFTCORAL   | 1252 | HWFDLVLAALDCYIWFVGSLLNPDIF--SGEG--RQGS--KLLQAMQHFLSVQVMDMDEVGKMFRR---epL--TDVYTP      | 1318 |
| STONYCORAL  | 1271 | LWFEFVLAALDCYIWFVGSLLNPDIF--SGEG--RQGS--KLLQAMQHFLSVQVMDMDEVGKMFRR---epL--TDVYTP      | 1318 |
| ACORN WORM  | 1276 | NWFDLVAALDCYIWFVGSLLNPDIF--SGEG--RQGS--KLLQAMQHFLSVQVMDMDEVGKMFRR---epL--TDVYTP       | 1318 |
| LANCELET    | 1280 | SWFDLVAALDCYIWFVGSLLNPDIF--SGEG--RQGS--KLLQAMQHFLSVQVMDMDEVGKMFRR---epL--TDVYTP       | 1318 |
| SEA URCHIN  | 1280 | TWLEVLVAALDCYIWFVGSLLNPDIF--SGEG--RQGS--KLLQAMQHFLSVQVMDMDEVGKMFRR---epL--TDVYTP      | 1318 |
| STARFISH    | 1280 | SWFDLVAALDCYIWFVGSLLNPDIF--SGEG--RQGS--KLLQAMQHFLSVQVMDMDEVGKMFRR---epL--TDVYTP       | 1318 |



Supplementary Figure 3: DNA-PKcs COBALT Metazoa Vertebrate Invertebrate

|             |      |                                                                                    |      |
|-------------|------|------------------------------------------------------------------------------------|------|
| TERMITE     | 1508 | SSV-----LHGDFYFVTFRSAILEHMLACFEHVSCLIKDISANNVQwVISVTEILQYAKIRKSKHQDSTT [3] FER     | 1581 |
| SHRIMP      | 1523 | TSQGEV---EKGSVHVLISILGPKLIPQFLESPPDALSRCVEMIREGRFLDAMGFASALLTCLIRNADIRKYSVK        | 1596 |
| SCORPION    | 1536 | TKTRR-----GLIMFSTYQOEISLFPAGINSKHFISLMMNINKSKTT-VLKLIVGLDLSIGVKVEFRYRYGKD          | 1605 |
| ALVINELLA   | 1488 | SSS-----DHGAMFYACFKSTVNQHLVANCAEFLDHLKWAHDETTT-VGCILISMLEYIRQDRQLRKNLGS            | 1557 |
| CAPITELLA   | 1541 | VST-SvqCSPHGTLYFAAFKSVVNLNFVKSVEKFPVLLMKRHEANGET-LSSVLIGIAESVISDRPLRKSCHKM         | 1615 |
| SPONGE      | 1555 | AAQ-----DGLLYITYSGLINNKLLHAKMAIDVLLKNAKTHPQQ--VSVILMLLLEYVQKDFKINNNNNK [5] LCT     | 1628 |
| OYSTER      | 1540 | YSQ-S-----GELMFLFAFKTTSVHLAKAMAQAVPVLCEHAQKCYR-VMSILVMVDTVSKDKNLRKQISAN            | 1609 |
| SNAIL       | 1548 | IEY-M-----LGDHFFFLFKTPISSHVA-ASSDVSLLMKNKATVDPHR-VCNVLMAMLENVAQDRIRKSNGR           | 1616 |
| TRICHOPLAX  | 1534 | ATA-----TLGMFLYTFNSNINAFKAVSNRCLPMLDLAASKSFM-ISGILSGLLDFILRDRGLRQSKGIH             | 1603 |
| SEA ANEMONE | 1542 | FSD---GSSVGAVFYTFQASINTYLKNAQSHIPQLVSMATSYSSH-VCSILNSILDQFNDRKTRKRYGSV             | 1613 |
| PRIAPULA    | 1554 | VSA---kQTTKGSMPFYSTFGHEINHLVGMATVLPKVLDRINRESV-VMTILTDLLDQVQKDRTRKRYGSG            | 1626 |
| ESHARK      | 1552 | ATQKNfITFSHGGEYFSLFSETINAEELLKSLKSAVTLMRSAENPKM-VSTVLNGMLDQSPFRDHTVRKTQGV          | 1627 |
| STERLET     | 1568 | TSQKNfITFSHGGEYFSLFQETINSELLKNLDTTVAOLMKSAAENPKM-VSMVLNGMLDQSPFRERVRKTQGSQ         | 1643 |
| COELACANTH  | 1556 | TSGRNLfITFSHGGEYFSLFMETINSELLRNLNLTAVLMLKSSAAENPKM-VGAILNGLDQSPFRNRTRKQGSQ         | 1631 |
| HUMAN       | 1545 | SSQGSVfHFSHGGEYFSLFSETINTELLKNLDAVLELMQSSVDNTKM-VSAVLNGLMDQSPFRERANRKHQGLK         | 1620 |
| CAECILIAN   | 1558 | TSQRNifSFSHGGEYFSLFSETINTELLKNLNTAIVLQMKSSVDNPRM-VGILNGLMDQCFRDRTRKQGVK            | 1633 |
| PLATYPUS    | 1549 | TSQRNifSFSHGGEYFSLFSATINTELLKNIDTAIVLQMKSSVDNAKM-VGILNGLMDQCFRDRTRKQGEK            | 1624 |
| CANARY      | 1547 | ASQNLfMNFSGQYFSLFSETINQQLKNLQVIVLRLMKSSISNPQM-VGILNGLMDQSPFRDRVRKQGAQK             | 1622 |
| OSTRICH     | 1517 | ASRKNfLVNFSHGGEYFSLFSETINEQLKNLQVIVLQMLMSSVSNPQM-VGILNGLMDQCFRDRTRKQGVK            | 1622 |
| TURTLE      | 1556 | TSQRNifSFSHGGEYFSLFSETINQELKDLDAVILQMKSSVDSPKM-VGILNGLMDQCFRDRVRKQGIK              | 1631 |
| ALLIGATOR   | 1514 | AAPRNfLFSHGGEYFSLFSETINHELLKNLDAVILQMKSSVDNPRM-VGILNGLMDQCFRDRTRKQGMK              | 1624 |
| SOFTCORAL   | 1554 | SST-----VGMVFYQTFHNTIEHLLIKNSSEHLPILEYNRDEAQW-VSSTVIALDLSMVKDKELRKMGRK             | 1622 |
| STONYCORAL  | 1568 | SNDNP---GSSCCCTFYRIFQTSINGFFIERANIHMANLMAKASSPFL-VLSLNGLDQVIRDKILTRNGSS            | 1641 |
| ACORN WORM  | 1576 | SSA-----GYCGLSFFSHKVPINTQLAQHGQVIVLRLMSSVSNPQM-VGILNGLMDQCFRDRVRKQGMK              | 1622 |
| LANCELET    | 1576 | KSS----TFQGMVFFSTFKSCICQQLIKTCAESVPLLQQLTAEVPV-VGILHGLLDHLAKDKTRKKEGMA             | 1646 |
| SEA URCHIN  | 1572 | TSKLSasQTLGLVFLTTYKQIMDQLVKHGQVIMDQVLRNVRDRGT-IGMIYGLEHVAVGNREIRKRYGMA             | 1647 |
| STARFISH    | 1585 | TSK-----GAVFYTFKTKLNGEMVAQKQVIVPLLVREGGKDVTV-VSSVLNGLLDVLTSSRVRRTHTGMS             | 1652 |
| TERMITE     | 1582 | SIVNHNKLSFFV---EGNSEQVYQLGLVNLARIMPQ--PDRG-LARCEALQKWVITQLTSRDLQLHYKSRALDVLVC      | 1655 |
| SHRIMP      | 1597 | SFLKHWPTLAAQA---GKTSLHQSDVLSLLSFLDIREGTIKSHcTSSRSDMVYFNGLLADAKVELQAKIKVLKLLPF      | 1673 |
| SCORPION    | 1606 | SIMCQWSRLQQL---EESCDIDLQNDITLITKMLDIDSSFIKGNV-NYDSNSIFPSFITLQKSEMSLEFKICVLDLLPF    | 1683 |
| ALVINELLA   | 1558 | ALLDRVFRILHAWHGASATKETQSMALNLLTKMLIDSKAVCNVQ-QKGFSHMFDMLNMLVDKRLSLSFKSNVLDLAF      | 1636 |
| CAPITELLA   | 1616 | AITYQWSSLSVWWSFESTASLDTKMVAITLLTKLQIDSTVIIDVK-NKSFYFVKMFLGLISDKNNTLQFKTRVLDLIF     | 1694 |
| SPONGE      | 1629 | ELLSHWQDLSLW---EDGSKDLKSAAVTLQKIALKPKLLKSA-DVS-KPLVDMYFAMIGDEKLELNFKAVMIDLLPS      | 1704 |
| OYSTER      | 1610 | SVVEKWRISSTWC---LA-TPELHSMAMLLTLKVLQIDSKVVTSS-SGHFPEVFTYLSLMTKKTLSVKCKILELPP       | 1685 |
| SNAIL       | 1617 | MVASKWHLESW---QAGSSDLQGLAVLLTLKLLVDSKAVLNVE-KSHFTTVPFSTYCTILAEKKTNLAFKNRALDVLFP    | 1693 |
| TRICHOPLAX  | 1604 | KILSSWNSLKCW---LTPDAQDQLQISVNLNKLTLDPQFATQSN-DSSFETVFNFLSLLSGTSTLAFKKYVLDLHF       | 1681 |
| SEA ANEMONE | 1614 | SIVNSWEVFLDSW---AKDSPLETKMAVLLAKLQIDSSVSNPNTS-HGSPFVFTTYISLADTKLHLKQAVTLFPY        | 1698 |
| PRIAPULA    | 1627 | TVLQCWGHRLDLW---VASTPDRKDMMLLRLKLLIDSSVATKGS-HSAHRDVTYCYCLLVDAQSTLAFKTRVMELLP      | 1704 |
| ESHARK      | 1628 | SIVQKWRISSTWC---SENSAESKMAVTLKVLQIDSSVSNPNTS-HEAFMVFHTYTYTLLTDLALNLKQAMILFP        | 1705 |
| STERLET     | 1644 | GVLGSWTSLQSW---ASSSAESKMAALTLKVLQIDSSVSNPNTS-HLAFVAVFTYTYTLLTDLALNLKQAMILFP        | 1721 |
| COELACANTH  | 1632 | TVLQNTKLSW---IRSSSPESKMAALTLKVLQIDSSVSNPNTS-HAFAVAVFTYTYTLLTDLALNLKQAMILFP         | 1709 |
| HUMAN       | 1621 | TVLQNTKLSW---AKDSPLETKMAVLLAKLQIDSSVSNPNTS-HGSPFVFTTYISLADTKLHLKQAVTLFPY           | 1698 |
| CAECILIAN   | 1634 | AVLQNTKLSW---DKNSAPESKMAVTLKVLQIDSSVSNPNTS-HEAFSAVFTYTYTLLTDLALNLKQAMILFP          | 1711 |
| PLATYPUS    | 1625 | AVLQNTKLSW---AEDSTPEKIAVTLKVLQIDSSVSNPNTS-HEAFSAVFTYTYTLLTDLALNLKQAMILFP           | 1702 |
| CANARY      | 1623 | AVLRNWEKLDGW---AKGSSAESKMAALTLKVLQIDSSVSNPNTS-HEAFSAVFTYTYTLLTDLALNLKQAMILFP       | 1700 |
| OSTRICH     | 1593 | AVLRNWEKLDGW---AKGSSAESKMAVTLKVLQIDSSVSNPNTS-HEAFSAVFTYTYTLLTDLALNLKQAMILFP        | 1670 |
| TURTLE      | 1632 | AVLRNWEKLDGW---AKGSSAESKMAVTLKVLQIDSSVSNPNTS-HEAFSAVFTYTYTLLTDLALNLKQAMILFP        | 1709 |
| ALLIGATOR   | 1590 | AVLRNWEKLDGW---AKGSSAESKMAVTLKVLQIDSSVSNPNTS-HEAFSAVFTYTYTLLTDLALNLKQAMILFP        | 1667 |
| SOFTCORAL   | 1623 | VLLSEWRISLHW---E-NGGELKRSTAILRINILVDPKCLSEVK---SSRGMFKTYNGLLTKTITLVKIQCLELPC       | 1697 |
| STONYCORAL  | 1642 | VLLNNWTSFEIFW---RTHSAMDLRHSILMILKMLLDPKAVTDCN-RLTFPSLFEMYLKLDKSTTLAFKGVLELPPY      | 1719 |
| ACORN WORM  | 1647 | AILSNWSSLKSW---SEGATHDQRSSSTLILKLLKQIDSKFASDPT-HAFAKPVDMYLMVMTDSNTSLAFKSRVLEILFY   | 1724 |
| LANCELET    | 1647 | SLLQSWPKLAPW---EAGALQDSKSTALTLRKLILIDSQVSRDPA-HPAFQPVFTMYLDMTLTSTLTPFKSQVLDLFP     | 1724 |
| SEA URCHIN  | 1648 | AVLTQWDTLSNLG-QE-----DDFMLNLMKVLQIDSKFATDPT-HPFTRPVFNQVLSMLRDSKSLAWKTQVLDVLYF      | 1719 |
| STARFISH    | 1653 | AILTQWDTLSNLG-QE-----DDFMLNLMKVLQIDSKFATDPT-HPFTRPVFNQVLSMLRDSKSLAWKTQVLDVLYF      | 1730 |
| TERMITE     | 1656 | LAGPq---EDTNQELRSALQTLREQHFPQLSTELHSGSVGVNFRKILRGLSESGSCVILLSVVAASAES-QHVLE        | 1732 |
| SHRIMP      | 1674 | FFTMg---EDIAKSVSEALEMLSLHNFPLHSTEFSEGGARDREYHQAICEILTLELSELSPIQLQVFNLFQRED-KHRYE   | 1750 |
| SCORPION    | 1684 | FLCDA---FLCKVQALNLDLFTNHFFLYSSELKPGSSQNDYHLAFTKLLIALELTGNEMLLKFKVQIMCRES-THLLE     | 1758 |
| ALVINELLA   | 1637 | FCSL---PEDYIWLQKELERFVDNPNPQKSDQYRKGSPKYNEYIISFNKILSALELSGNLMLLELLISICKEE-AHAE     | 1713 |
| CAPITELLA   | 1695 | FCNL---PAEENKQLESLNQFVADCFPMSSLEFHAAGSQQKCYITADRLLELAMELSSGSLMLNLIISVICKEV-KHTE    | 1771 |
| SPONGE      | 1705 | FLLSs---SPEHQSQLKGLNRLVSLQPLTSELPAAGPLLENYTNIIEKLCNSLVASGSLVLELIIINIMCREV-RHVCE    | 1782 |
| OYSTER      | 1686 | FATL---PEPHLKLKRLDLRLVADHFPKISTDLPESSPHFKDYIAADRLLTSELSSGSEMELLEISIFCREP-KHVYE     | 1762 |
| SNAIL       | 1694 | FAAV---PDA---KLKDLVLDGLVADNFPKRSSELTKGTPRFVVDYISAIDKLLSALELSLVLLELISIFCREG-RHVHE   | 1768 |
| TRICHOPLAX  | 1682 | FLVSs---DKRIRELREHLDRIIVDKFPLKSAEFVVGSPDYNDYVACIDKLLANLKSGLNMLLELIVSMCREK-KHAYE    | 1758 |
| SEA ANEMONE | 1692 | FKNL---PDNYQSQLKSCIDTLVTDNPLKSTEFIPGSPRYNDYIATLDKLLVMVTSGLVLVQIVAVLCREE-RHVHE      | 1768 |
| PRIAPULA    | 1705 | YCEL---PEQETTCLRNLDRMVADFPPLRSSDFIVGSPKYHDYVAAMSQLLDMVEVSGTMLLRVIVCREG-KHAMH       | 1781 |
| ESHARK      | 1706 | FAHL---PEENLAVLRHALDQFVAHFPMKSEDFPKGTLKYNVDAIKKLLDALELSQSPMLLKMIAILCRDS-RHVME      | 1782 |
| STERLET     | 1722 | FTNL---LGSSTLADLHNALEVLVAFHFMQSEDFPKGTLKYNVYDYSIKKFLDALELSQSPMLLQMTGILCRDN-KHVME   | 1798 |
| COELACANTH  | 1710 | FTNL---PEDHLADLKNALDQLVAFNPMKSEDFPKGTLKYNVYDYSIKKFLDALELSQSPMLLQMTGILCRDS-KHCLE    | 1786 |
| HUMAN       | 1699 | FTSL---TGGSLLELRRVLEQLIVAFHFMQSEDFPKGTLKYNVYDYSIKKFLDALELSQSPMLLQMTGILCRDQ-QHVME   | 1775 |
| CAECILIAN   | 1712 | FTNL---TGDLSNLDLKNALDQLVAFNPMKSEDFPKGTLKYNVYDYSIKKFLDALELSQSPMLLQMTGILCRDQ-KHFME   | 1788 |
| PLATYPUS    | 1703 | FTNL---TGDRLNDLKNALDQLVAFNPMKSEDFPKGTLKYNVYDYSIKKFLDALELSQSPMLLQMTGILCRDQ-RHFME    | 1779 |
| CANARY      | 1701 | FTNL---TGEKLLNDLKNALDQLVAFNPMKSEDFPKGTLKYNVYDYSIKKFLDALELSQSPMLLQMTGILCRDN-RHFME   | 1777 |
| OSTRICH     | 1671 | FTNL---TGEKLLNDLKNALDQLVAFNPMKSEDFPKGTLKYNVYDYSIKKFLDALELSQSPMLLQMTGILCRDN-RHFME   | 1747 |
| TURTLE      | 1710 | FTNL---TGDRISELKNALDQLVAFNPMKSEDFPKGTLKYNVYDYSIKKFLDALELSQSPMLLQMTGILCRDN-RHFME    | 1786 |
| ALLIGATOR   | 1668 | FTNL---TGERLKLKDALDQLVAFNPMKSEDFPKGTLKYNVYDYSIKKFLDALELSQSPMLLQMTGILCRDN-RHCEM     | 1744 |
| SOFTCORAL   | 1698 | FTSAtIPSEYTLALRSALKTLIADNFPKSSKFEFNNPNKSYDYIAALDKILSALVIGSGLMLLLELISIVCREE-SHSHE   | 1776 |
| STONYCORAL  | 1720 | FTKS---TEBYLRRLKGLNAFVFNNTNPKSTEFNFGPYNDYVQIDRKLAAFNNSRSLLEVLIAIFCRER-QHVHE        | 1796 |
| ACORN WORM  | 1725 | FTRI---PEQELSLQGRNLRIADNFPKSSKFEFNNPNKSYDYIAALDKILSALVIGSGLMLLLELISIVCREE-KHVCE    | 1801 |
| LANCELET    | 1725 | FTVL---PQTLAELKARLDRMVADNFPKSAEFPAGSSKYNDYVAVTKLLSALELSLMLLELISIVMCREA-KHVME       | 1801 |
| SEA URCHIN  | 1720 | FANV---PEREEKELKSDLDLVANFPKSTDLFAGSPRYNDYIMALNKLITLSVMSSGSLMLLELISIVCREE-KHSYE     | 1796 |
| STARFISH    | 1731 | FTSL---PDGEQTKLRSALDRLVADNFPKSSKFEFNNPNKSYDYIAALDKILSALVIGSGLMLLLELISIVMCREE-KHAYE | 1807 |

Supplementary Figure 3: DNA-PKcs COBALT Metazoa Vertebrate Invertebrate

|             |      |                                                                                    |      |
|-------------|------|------------------------------------------------------------------------------------|------|
| TERMITE     | 1733 | DQIQKSLQIFIKRRL--EDKQVKAIEAVFKV-FV-DDQ-YDPSVRLGCAQRFVVRPLLQGCRRSAAREFYRHCIQDLQGLM  | 1807 |
| SHRIMP      | 1751 | EVMHESLEKFMKRL--PLLKQETLKHIDYDM-YN-DPTCKQNLRYNIMDLVPLPLQQAEAVPTQNFLLTVISAVMAGM     | 1826 |
| SCORPION    | 1759 | ENIQKCLKLLKCRRT--DSNKERLIAEVPLKM-FL-EDELYPSDMRTHIEKVFVRVILGMISKITLKYFFIDHIKEIMQIV  | 1834 |
| ALVINELLA   | 1714 | EHIQKFLTKMAKRL--PVDKQPAIEVPIYRI-FC-NESTFKNAHRRRAALERVCVTLRLRAVSVPALKEFFYDHKIDIMFSI | 1789 |
| CAPITELLA   | 1772 | NAIQSAFQRFIKRRL--PKDKHKLALDVPYKI-FS-QEGRFTNNQRRAAACEKVSLSMLRHLVSSALTEFYCEHIKEIMKII | 1847 |
| SPONGE      | 1783 | EKIQTSLHQFISKL--SEGDVALKFVYEM-FK-NDKDFVAAVKGIGERLCVPLFTECSSAVLLEFFVVKISDVMCIM      | 1857 |
| OYSTER      | 1763 | TKILESINRFRTRV--PAAKQKSMVDVAYNI-FC-QEDLYPGEVRRTTIEKVALPIRLRHVKSALLEFFTDHMGDLRTTV   | 1838 |
| SNAIL       | 1769 | DAIQQSLNFTTARL--PAEKQKDALDVPYKIFC-ESG-FQDMIRRTTLERVCPLPIRLCVHKAALTEFFLDHLLDMRIV    | 1844 |
| TRICHOPLAX  | 1759 | EIQKSLLLFISLSpk--DALGALDVPFKM-FV-DDKSYRPIRRAAIERVCLPMLQKASLKITKDFYVSHIKEIMDII      | 1834 |
| SEA ANEMONE | 1769 | EIQKSLAAFIQRLapSSSLVKGAVDVTYRI-FT-NERDHTSNVRLAVLDRVSVTLTLCNASKAGVSEFFSSHVKEIMEII   | 1846 |
| PRIAPULA    | 1782 | DQLQTSLSRFIHRLL--SADKQKLAADSGYSI-LA-EEGNFPEIRRSCLDNVVLRLRQCCHHAVVEFFRCHLVEIIGII    | 1857 |
| ESHARK      | 1783 | EGFQVCFQRLAKTG--SCEKQVALLAVYGM-FE-NEGGLSNIRARQSVMDRSLTLITHCSLDALKEPISKIKDAMGIL     | 1858 |
| STERLET     | 1799 | ELFQTCFKRIARRG--SCEKQVLLDVTYQM-FQ-NDELHNTARQAVLDRSLLTLTHCSLDALKEFFCTVGDIMGTL       | 1874 |
| COELACANTH  | 1787 | ELFLQSFKRIARRG--SCDRQVTLDDTVYKM-FC-SEDLRSNTROAIMDRFTLITMLNCSIDCKEFLCKNILDVMTL      | 1862 |
| HUMAN       | 1776 | ELFQSSFRRIARRG--SCVTQVGLLESVYEM-FR-KDDPRLSFTROSFVDRSLLTLLWHCSLDALREFFSTIVDAIDVL    | 1851 |
| CAECILIAN   | 1789 | ELFLTSFKRIARRG--NCDKQVALLTVHDM-FK-TENLWNTTRQTIIVDKSLLLIWHCSLDALKEFFCKIIHMTDITL     | 1864 |
| PLATYBUS    | 1780 | ELFQMSFKRIARRS--GSAKQVALLAVHGM-FL-RDHLSSSTRQAFVDRSLLTLHCSLDALKEFFYRIIVGAMDML       | 1855 |
| CANARY      | 1778 | DLFQASFKRISRRS--PTDKQVLLDVTYHKM-FQ-SEELLSNAARQAFVDRSLLTLLWHCSLDALRVFFGKIIIVAMDITL  | 1853 |
| OSTRICH     | 1748 | DLFQASFLIFKIRRL--NSDRQVLLDVTYHKM-FQ-SEELLSNVTRQAFVDRSLLTLLWHCSLDALRVFFGKIIIVAMDITL | 1823 |
| TURTLE      | 1787 | DLFQTSFKRISRRS--SYEQVQVLLDVTYHKM-FQ-SEALLSNARQAFVDRSLLTLLWHCSLDALRVFFGKIIIVAMDITL  | 1862 |
| ALLIGATOR   | 1745 | DLFQTSFKRISRRS--DCNKQVLLDVTYHKM-FQ-SEELLSNVTRQAFVDRSLLTLLWHCSLDALRVFFGKIIIVAMDITL  | 1820 |
| SOFTCORAL   | 1777 | EEIQIQAFKFIKRL--KLQARKALDICFDV-FTKKDTYRNLRRAAIDKVCVLLRASSTVVFREFYVDHIKIMEII        | 1853 |
| STONYCORAL  | 1797 | DQIQQSFIAFIQRLhpPQAKAAMDVCLSI-FF-NERDVTQTHSRRAVIERICTITFLKTKSTARRAFYQDQIKLMSVL     | 1874 |
| ACORN WORM  | 1802 | DLFQASFLIFKIRRL--PADKQKPAVDVAFDV-FH-KENVDYNDIRRAALERVGLPLRLRVDIPITLSTFFISHVQIMNTI  | 1877 |
| LANCELET    | 1802 | DDIQTSLSRFIKGM--GADRQKPALDIPYGI-FR-REGSFPNEIRRSALERVCLPMLRLVHPALTEFFTDHIREIMDII    | 1877 |
| SEA URCHIN  | 1797 | DIQKGLSSFAKRL--PSEKQSAANIPFEI-FK-QDNYSKEIRRAAIAQRVCIPLLRQASRDATVTFYKGIHDIISVL      | 1872 |
| STARFISH    | 1808 | DEIQESLAAFIKRL--PEEKQTAAGVAYQI-FC-QDNYSFKEIRRAAIAERVCIPLRLRQASRDATVTFYKGIHDIISVL   | 1883 |
| TERMITE     | 1808 | NVTLDRCRGLQTEHQLVGRIGAWNILEPLFVHLESSELESKECVITAAAFPGAV--KTGKE-LISDLTSTRAYKYRSE [4] | 1885 |
| SHRIMP      | 1827 | SAPVHGRSDEQHKTLVT-KVGSFMILQIMYKFLRKLFPAGEISINAAFRPGDQ----SGKeLTKELIFRYAAKISKG      | 1898 |
| SCORPION    | 1835 | KSKRKSNE----IQLVSKIGAFQLIEILYTYLSKEEV-SKESQINCSYKELT-----REATGFATAARKE             | 1896 |
| ALVINELLA   | 1790 | ELQFSQL--SVSESQMTKLCNFELLEVMSRLTRREVRSKNTINQKCYPKT-dVEGKE-LTAAITKAAHHTKRE          | 1862 |
| CAPITELLA   | 1848 | EAKPTKAPEHAFEAQLTKSKIGCFELLEVMSRLPNTDVSNDKSSINKSFCBPKI--PDTGKeMNLITKVSNTATKE       | 1922 |
| SPONGE      | 1858 | EAKLARVTDPLCEQLVHKSCCFQFTEILYTRLPSSLSMSSTVNTAYCNGSP--QTGKE-LTQAITKCHGAKSE          | 1931 |
| OYSTER      | 1839 | EAKLVK--SGLENQLTKLCCPQLLELMYGRLSKEEDVHSGKSVINNKKFCVGSVnVDTGKeMTQIMRTAHEAKGE        | 1913 |
| SNAIL       | 1845 | EQLNLAGPESILKTLTKSVCCPQLLEVMSRSLREEVNSLSSEINKKVCFGKP--ETGKeMTQIKIKAANNAKSE         | 1918 |
| TRICHOPLAX  | 1835 | ETKLVT--ADLENQLISKLGKYLKMLKMYSKLQKDVNTAESIVKAYTGRPT--EDGKE-ITKSIKAAHACKSD          | 1906 |
| SEA ANEMONE | 1847 | EAKPQTYDPPGFESQLTKKMGYKILEVMYSRLKQKABLNPSQSSINLAYCPNDN--TGKE-LTKAITKSAHAAKSE       | 1919 |
| PRIAPULA    | 1858 | EAKVVKLPERQYESQLISKISLKLLELMYACLPKEDVYKGDALGOVFLASRP--AGSKE-LTPVITRLCYDACRE        | 1931 |
| ESHARK      | 1859 | QARFTKTESSEFDNLQTRKIGCYKLEVTYIRLPKEDVHSGKSVINNKKFCVGSVnVDTGKeMTQIMRTAHEAKGE        | 1933 |
| STERLET     | 1875 | QARFTKTESSEFDNLQTRKIGCYKLEVTYIRLPKEDVHSGKSVINNKKFCVGSVnVDTGKeMTQIMRTAHEAKGE        | 1948 |
| COELACANTH  | 1863 | QARFTKSNESAFDQVTKTKGKYLKMLKMYSKLQKDVNTAESIVKAYTGRPT--EDGKE-ITKSIKAAHACKSD          | 1906 |
| HUMAN       | 1852 | KSRFTKSNESAFDQVTKTKGKYLKMLKMYSKLQKDVNTAESIVKAYTGRPT--EDGKE-ITKSIKAAHACKSD          | 1926 |
| CAECILIAN   | 1865 | KGRFTKSNELAFDAQIMMKMSYKMLKMYSKLQKDVNTAESIVKAYTGRPT--EDGKE-ITKSIKAAHACKSD           | 1938 |
| PLATYBUS    | 1856 | KSRFTKSNESAFDQVTKTKGKYLKMLKMYSKLQKDVNTAESIVKAYTGRPT--EDGKE-ITKSIKAAHACKSD          | 1929 |
| CANARY      | 1854 | NSRFTKSHHTFDQVTKTKGKYLKMLKMYSKLQKDVNTAESIVKAYTGRPT--EDGKE-ITKSIKAAHACKSD           | 1927 |
| OSTRICH     | 1824 | NSRFTKSNESAFDQVTKTKGKYLKMLKMYSKLQKDVNTAESIVKAYTGRPT--EDGKE-ITKSIKAAHACKSD          | 1897 |
| TURTLE      | 1863 | KTRFTKSNESAFDQVTKTKGKYLKMLKMYSKLQKDVNTAESIVKAYTGRPT--EDGKE-ITKSIKAAHACKSD          | 1936 |
| ALLIGATOR   | 1821 | KSRFTKSNETVFNQVTKTKGKYLKMLKMYSKLQKDVNTAESIVKAYTGRPT--EDGKE-ITKSIKAAHACKSD          | 1894 |
| SOFTCORAL   | 1854 | ENTRFSKATDSVFESQLVSKLCCPKLLALLYARLEKTDVHSGKSVINNKKFCVGSVnVDTGKeMTQIMRTAHEAKGE      | 1926 |
| STONYCORAL  | 1875 | EAKELKPTDPNFESQVTSKLCCKPFLVILYQFSKSELNLTLESTINKAYVGGDV--KTGKE-LTLAITKAAHAASE       | 1948 |
| ACORN WORM  | 1878 | EAKQIKVPESSEFTQLVSKIGCFELLEVMSRMTKEELNTPQSKVNIKYCRDSV--KSGKE-MTMALTKIAHAAKGE       | 1951 |
| LANCELET    | 1878 | GAQPTKAGEASLRQLVTKNKLCCPQLLELMYGRLSKEEDVHSGKSVINNKKFCVGSVnVDTGKeMTQIMRTAHEAKGE     | 1951 |
| SEA URCHIN  | 1873 | EARLTKNVPAPFENQLVSKICYFELLEVMSRSLKDDLNKSDSALNREYRHGNV--EKGNE-MSTALTKAALGARNE       | 1946 |
| STARFISH    | 1884 | DAKTIKAPETVFNQVLSKTCPPQLVLMYSRLVKEDLFSMDSAINKAYTND-V--KTGKE-MTQALTKACHAAKSE        | 1956 |
| TERMITE     | 1886 | NLTGNVQLVELFRSQCAAFNTLVAIISNVKCELRFPTGLLFSENKAK-EVPWGLVNCNKEYALALDWEIPARRKQLV      | 1964 |
| SHRIMP      | 1899 | ELRHDTAEALRRLCACAAYNAIIVLAVCVQNDLRFYTNFLSANPTKGEVIWECLVDCSRNLEFDVEINFKPASKRRFV     | 1978 |
| SCORPION    | 1897 | NLEGESITAEALRRLCACAAYNAIIVLAVCVQNDLRFYTNFLSANPTKGEVIWECLVDCSRNLEFDVEINFKPASKRRFV   | 1975 |
| ALVINELLA   | 1863 | NLQGEVPLELQRQYCAAYNTLIVAVICTQTEIKFYNGFLFSENINMGECGLWDLVDQKQKEYFPPVELQNP--HHKKLV    | 1940 |
| CAPITELLA   | 1923 | NMNGETLLIPLRRALHCAAYNTLIVAVICTQTEIKFYNGFLFSENINMGECGLWDLVDQKQKEYFPPVELQNP--HHKKLV  | 2002 |
| SPONGE      | 1932 | DLHGDRTHYETRRQYHCHAYNTLMSVICTQSKPQFPVFLFKEDVVKQGLLWDLNIDCEKQYEFQVDFEAPLKRKQIT      | 2011 |
| OYSTER      | 1914 | DVRGETSMVELRRQYHCAAYNTLIVAVLSSTQTDKAFYTAFLFKEDVVKQGLLWDLNIDCEKQYEFQVDFEAPLKRKQIT   | 1993 |
| SNAIL       | 1919 | DLRGETSMVELRRQYHCAAYNTLIVAVLSSTQTDKAFYTAFLFKEDVVKQGLLWDLNIDCEKQYEFQVDFEAPLKRKQIT   | 1998 |
| TRICHOPLAX  | 1907 | DLRGETSMVELRRQYHCAAYNTLIVAVLSSTQTDKAFYTAFLFKEDVVKQGLLWDLNIDCEKQYEFQVDFEAPLKRKQIT   | 1986 |
| SEA ANEMONE | 1920 | DMRGETVAFELRRQLHCAAYNTLIVAVLSSTQTDKAFYTAFLFKEDVVKQGLLWDLNIDCEKQYEFQVDFEAPLKRKQIT   | 1999 |
| PRIAPULA    | 1932 | DMRGERALLELRQYHCAAYNTLIVAVLSSTQTDKAFYTAFLFKEDVVKQGLLWDLNIDCEKQYEFQVDFEAPLKRKQIT    | 2011 |
| ESHARK      | 1934 | NMTGEKQLEKRRQYHCAAYNCIMAVVTCIFTEAKFYQGLFSEKAEKNLIFENLLEAHTYVFPVEIEVPLERKKRYV       | 2013 |
| STERLET     | 1949 | NMAGETQLEKRRQYHCAAYNCIAVIVISCVFTESKFYQGLFSEKPEKNLIFENLIDAKHTYVFPVEIEVPLERKKRYV     | 2028 |
| COELACANTH  | 1937 | NMAGETQLEKRRQYHCAAYNCIAVIVISCVFTESKFYQGLFSEKPEKNLIFENLIDAKHTYVFPVEIEVPLERKKRYV     | 2016 |
| HUMAN       | 1926 | NMAGENQLLEKRRQYHCAAYNCIAVIVISCVFTELKFYQGLFSEKPEKNLIFENLIDAKHTYVFPVEIEVPLERKKRYV    | 2005 |
| CAECILIAN   | 1939 | NMAGETQLEKRRQYHCAAYNCIAVIVISCVFTESKFYQGLFSEKPEKNLIFENLIDAKHTYVFPVEIEVPLERKKRYV     | 2018 |
| PLATYBUS    | 1930 | NMAGETQLEKRRQYHCAAYNCIAVIVISCVFTELKFYQGLFSEKPEKNLIFENLIDAKHTYVFPVEIEVPLERKKRYV     | 2009 |
| CANARY      | 1928 | NMAGESQLEKRRQYHCAAYNCIAVIVISCVFTESKFYQGLFSEKPEKNLIFENLIDAKHTYVFPVEIEVPLERKKRYV     | 2007 |
| OSTRICH     | 1898 | NMAGESQLEKRRQYHCAAYNCIAVIVISCVFTESKFYQGLFSEKPEKNLIFENLIDAKHTYVFPVEIEVPLERKKRYV     | 1977 |
| TURTLE      | 1937 | NMAGESQLEKRRQYHCAAYNCIAVIVISCVFTESKFYQGLFSEKPEKNLIFENLIDAKHTYVFPVEIEVPLERKKRYV     | 2016 |
| ALLIGATOR   | 1895 | NMAGESHLLGKRRQYHCAAYNCIAVIVISCVFTESKFYQGLFSEKPEKNLIFENLIDAKHTYVFPVEIEVPLERKKRYV    | 1974 |
| SOFTCORAL   | 1927 | NMQGETVLELPLRRYHCAAYNTLIVAVLSSTQTDKAFYTAFLFKEDVVKQGLLWDLNIDCEKQYEFQVDFEAPLKRKQIT   | 2006 |
| STONYCORAL  | 1949 | DMRGETSMVELRRQYHCAAYNTLIVAVLSSTQTDKAFYTAFLFKEDVVKQGLLWDLNIDCEKQYEFQVDFEAPLKRKQIT   | 2027 |
| ACORN WORM  | 1952 | DIRGESVLELRRQYHCAAYNTLIVAVLSSTQTDKAFYTAFLFKEDVVKQGLLWDLNIDCEKQYEFQVDFEAPLKRKQIT    | 2031 |
| LANCELET    | 1952 | DLRGETGLLDRRFHCAAYNTLIVAVLSSTQTDKAFYTAFLFKEDVVKQGLLWDLNIDCEKQYEFQVDFEAPLKRKQIT     | 2031 |
| SEA URCHIN  | 1947 | DCRGETVAFELRRQYHCAAYNCIAVIVISCVQDMKIFYNLFSENHAKQGLLWDLNIDCEKQYEFQVDFEAPLKRKQIT     | 2026 |
| STARFISH    | 1957 | DIRGETVAFELRRQYHCAAYNTLIVAVLSSTQTDKAFYTAFLFKEDVVKQGLLWDLNIDCEKQYEFQVDFEAPLKRKQIT   | 2036 |

Supplementary Figure 3: DNA-PKcs COBALT Metazoa Vertebrate Invertebrate

|             |      |                       |                          |                                        |                                 |                         |                   |      |
|-------------|------|-----------------------|--------------------------|----------------------------------------|---------------------------------|-------------------------|-------------------|------|
| TERMITE     | 1965 | SIRCOARAQRRETLGFASQS  | VRYIPSA[1]               | QYLFDSLNLNEDVTLDFD                     | --STSVVSTEARPG                  | -----HDEKTP             | 2027              |      |
| SHRIMP      | 1979 | AVRQKLRREAREEGAVVAGT  | VQYMAASH                 | --YLDSSSLREDMSQDFD                     | n-----NSVVLAMS                  | ---QTEKSSSERVGTGAN      | 2043              |      |
| SCORPION    | 1976 | SVRHENRELNNSKNTLNASS  | LKYAPASQ                 | --YLDSSSLSDVVSQDFD                     | --SSSELAFSQDMKknkRKEE           | IDSNSPNEA               | 2046              |      |
| ALVINELLA   | 1941 | AIRSEHRESENFDSSLPVSN  | --YLASQ                  | --YLDSSSLMDDVVSQDFD                    | --TVSVQTSSTYTS                  | ---PSSKHKHSRLTK         | 2006              |      |
| CAPITELLA   | 2003 | SIRTSVRDVPDDEPTGPAF   | [1]VHYLASQ               | --YLAGSSSLTDVVSQDFD                    | --GSSMVSSADSSF                  | -----DNQRSRESSIE        | 2069              |      |
| SPONGE      | 2012 | SIRDDLKQSTAAGNSSGSPS  | [6]PRYISSQ               | --YLDSSSLTDVVSQDFD                     | ---TLPHHHQYGSV                  | ---GGGASTESSSID         | 2083              |      |
| OYSTER      | 1994 | SIRNEVKE--SNQGEADEG   | [3]SLHLAS-               | QYLADSSLEDLQYDFD                       | --TATPQMSSEGSPrekLTVRKSSYT      | ----                    | 2062              |      |
| SNAIL       | 1999 | AIRSEMQE--KQS----     | DKDG[3]SYHLAS-           | QYLFESSLEDLSKYEF                       | --TVSGSAQNTSG                   | ----iPKTKASLRK          | 2060              |      |
| TRICHOPLAX  | 1987 | SLREQRSRSVSSADEADS    | [5]PSYHLS-[1]            | QYLADSSLENEISQDFD                      | n--SSTVQGYSENNSikqIPTRETGDSEKAK | ----                    | 2064              |      |
| SEA ANEMONE | 2000 | SIRINARVQSDQVEEALSQG  | [2]VRYLSS-               | QYLADSSLEEVVSQDFD                      | --STPVQVNIINYL                  | -krTKGPDQLGEDSYE        | 2071              |      |
| PRIAPULA    | 2012 | AIRTAVRE---IDRDADQGG  | [5]VHYLAS-               | QYLADSSLEDLSRYDF                       | nvSTQIRERGDPRaerkPEGEAEEQE      | EAAA                    | 2086              |      |
| ESHARK      | 2014 | SIRKEAREAGDGSSE       | ----                     | PQYLSQ                                 | SYMADSSLEEMSQDFD                | --STGVQSFYSNSQ          | ---DPRGHAVRSRRKE  | 2078 |
| STERLET     | 2029 | AIRKEARQGGEGDSDE      | ----                     | PHYLSQ                                 | SYMADSSLEEMSQDFD                | --STGVQSFYSNSQ          | ---DPSARAAARGRRRE | 2093 |
| COELACANTH  | 2017 | AIRKEARSTIGDLS        | ----                     | PQYMSQ                                 | SYMADSSLEEMSQDFD                | --STGVQSFYSNSQ          | ---NRAAAVVHSRRKE  | 2081 |
| HUMAN       | 2006 | EIRKEAREANGDSG        | ----                     | PSYMSL                                 | SYLADSSLEEMSQDFD                | --STGVQSFYSNSQ          | ---DPRPATGRFRRE   | 2070 |
| CAECILIAN   | 2019 | AIRQEARNANGESDA       | ----                     | PHYLSQ                                 | SYMADSSLEEMSQDFD                | --STGVQSFYSNSQ          | ---DPTAAQFHSRRKE  | 2083 |
| PLATYPUS    | 2010 | AIRKEARVNDNSDE        | ----                     | PHYLSL                                 | SSMADSSLEEMSQDFD                | --STGVQSFYSNSQ          | ---DVKSTGYHFRRE   | 2074 |
| CANARY      | 2008 | AIRKEARDAGNSQDE       | ----                     | PKYLASS                                | SYMDSSLEEMSQDFD                 | --STGVQSFYSNSQ          | ---DVTASSTRFRRE   | 2072 |
| OSTRICH     | 1978 | AIRKEARSTIGDLS        | ----                     | PKYLPAS                                | SYMDSSLEEMSQDFD                 | --STGVQSFYSNSQ          | ---DVTASSTRFRRE   | 2042 |
| TURTLE      | 2017 | TIRKEARDAVNRDSD       | ----                     | PQYLPAS                                | SYMDSSLEEMSQDFD                 | --STGVQSFYSNSQ          | ---DPTASSIHRFRRE  | 2081 |
| ALLIGATOR   | 1975 | AIRKEARDVNGGPD        | ----                     | PQYLPAS                                | SYMDSSLEEMSQDFD                 | --STGVQSFYSNTQ          | ---DPTATSAFRFRRE  | 2039 |
| SOFTCORAL   | 2007 | SIRKEARATVNMSSSENYEHG | [2]LRYLSS-               | QYLADSSLECEVSQDFD                      | --STPIQA--LSQS                  | -estEQDIAGGENSGT        | 2076              |      |
| STONYCORAL  | 2028 | --RMQARIPSPKENS       | ----                     | [2]SAGRTGL[7]                          | QYLADSSLEEDISQDFD               | --SSPIQVHSGTEA          | -rqPLYKLNESSSTAE  | 2101 |
| ACORN WORM  | 2032 | AIRKEVRD--ASEEDLQDS   | [9]VRYLSS-               | QYLADSSLEEMSQDFD                       | --NTGQLYWHNTL                   | Cmsi---FACMLHVLP        | 2106              |      |
| LANCELET    | 2032 | SIRQELRE--QDSPEA      | ----                     | [2]SRYMQS-                             | --YLAGSSLEDISQDFD               | --TSGTQVKHSQT           | FsstQERYSQASQGSRR | 2097 |
| SEA URCHIN  | 2027 | AIRTOARG--TNTPEESG    | --[4]PAHYLSS             | QYLADSSLEEDVQDFD                       | --SSSRHFGSSMSsq                 | -rDGSQGSQGSQR           | 2097              |      |
| STARFISH    | 2037 | SIRNQDQDTRGSSSQSDS    | [8]GRYLS-                | T--                                    | QYLADSSLEEDISQDFD               | --SGGVQFNASIDkq         | -SLSRQSSVPHIK     | 2114 |
| TERMITE     | 2028 | -KE---SGAESTEV        | ILESDDLNMHECMA           | TLGCVIEHMVDQGISPTPDAETKDA              | --ALPPWMESMRKCLS                | --DYSQPR                | 2096              |      |
| SHRIMP      | 2044 | EMGg---               | VLMFVHMDSQYNGHEVMANL     | TVINHMVDAEIMVLHKGDTVPKATDVPQWMTLVQKQLD | --SADTPR                        | ----                    | 2113              |      |
| SCORPION    | 2047 | KDD---                | DLVSNITVELEIDDLNQHECMNSL | TMLVQHMEKIQL                           | ----LSSSPK--EIPKWL              | DLNLCCKLE--DYSVHR       | 2111              |      |
| ALVINELLA   | 2007 | [7]DVLdteVTVQGDYVE    | IEMDELNKHCEMPL           | IGLKLHMARNNITPSVTKGETPA                | --SLPTWMSN                      | IKNKLQ--CPSSTR          | 2086              |      |
| CAPITELLA   | 2070 | [1]VDP---             | VVLKEHYIEMEDALNQHECMAL   | SALLQHKLNQITPEVEKGSKS                  | ----                            | EMPTWKNLHDKIK--NSDTQL   | 2139              |      |
| SPONGE      | 2084 | [5]SQEassYVVEE        | --QLEEDLNIHECMT          | PLMKLDHMIINKITPAPSGDSP                 | ----                            | EMPPWMTPLHKRMT--DSRTRG  | 2157              |      |
| OYSTER      | 2063 | [3]DDTdtkVMVDYVE      | LEMDELNQHECMANM          | ALLKHMQRAKIPLVSEGVVP                   | ----                            | ELPAMWKNLNDKLR--SPRTHN  | 2137              |      |
| SNAIL       | 2061 | [3]YGGdnkVRLDGDYVE    | LEMDELNSHECMA            | PLVALLKHIIKNNIFPAAQSDASSQ              | ----                            | DMPQWVFLHDKMTknTGSDDL   | 2138              |      |
| TRICHOPLAX  | 2065 | TTI----               | NKFADEE                  | LELDDLNKHCEMALLTLLDHMAVNKINPAIEKDTTPS  | ----                            | EMPSWVALRKKAS--DHTNTR   | 2132              |      |
| SEA ANEMONE | 2072 | IGLg---               | D-----                   | VEMDELNSHECLTKICSLTLMKESNI             | SPQDKGALP                       | --DMPSSALHKKLT--NFETHL  | 2133              |      |
| PRIAPULA    | 2087 | [4]EESgsATLADYVE      | MEMDELNQHECMA            | SMVALINHLATVVCPIQA                     | --ASSPA--HMPAWMELLHGKFS         | --HVEITPL               | 2161              |      |
| ESHARK      | 2079 | QAE---                | SVVQSDVLEEMDELNQHECMA    | PMIALINHMQRNNITPQVEEGKTPQ              | ----                            | ELPAMWFLHGKLG--NSSIPL   | 2149              |      |
| STERLET     | 2094 | RVE---                | SLVQDDVVELEMDELNQHECMA   | SMTALLNHMQRNNITPKVDEGTVPA              | ----                            | DLPPWPKFVHGKFG--NASTHL  | 2163              |      |
| COELACANTH  | 2082 | RTB---                | SVVQDDVMEFEMDELNQHECMA   | AMTALLNHMQRNNITPKVDEEGTVPA             | ----                            | ELPPWPKFLSHKLA--NPATPL  | 2151              |      |
| HUMAN       | 2071 | QRD---                | YVHDDVLEEMDELNRHECMA     | SMTALLNHMQRNNITPKVDEEGTVPA             | ----                            | DLPPWPKFLHGKLG--NPVPL   | 2140              |      |
| CAECILIAN   | 2084 | HPE---                | FTVQDDVMEFEMDELNQHECMA   | AMTGLIKYMQKTIPTPKVEEGTVPA              | ----                            | DLPPWPKFLHGKLG--NTSTPL  | 2153              |      |
| PLATYPUS    | 2075 | YRD---                | PVTQSDVLEEMDELNQHECMA    | TMTALLNHMQRNNITPKVDEEGTVPA             | ----                            | DLPPWPKFLHGKLG--NPLGAL  | 2144              |      |
| CANARY      | 2073 | PTE---                | YKVLNDEMELEMDEFNQHECMA   | SMTSLIKHMERNQITPKVDEEGTVPA             | ----                            | DLPLWPKFLHGKLG--NPSVPL  | 2142              |      |
| OSTRICH     | 2043 | PTB---                | YMALDDDTVELEMDELNQHECMA  | SMTLLKHMQRNNITPKVDEEGTVPA              | ----                            | DLPLWPKFLHGKLG--NPSVPL  | 2112              |      |
| TURTLE      | 2082 | PTB---                | SMDDDLMELEMDELNQHECMA    | SMTLLKHMQRNNITPKVDEEGTVPA              | ----                            | DLPPWPKFLHGKLG--NPSMPL  | 2151              |      |
| ALLIGATOR   | 2040 | STB---                | SMVDDDEMELEMDELNQHECMA   | TMTLLKHMQRNNITPKVDEEGTVPA              | ----                            | ALPPWPKFLHSLKLG--NPSVPL | 2149              |      |
| SOFTCORAL   | 2077 | PASpkESDSISSE         | LEMDELNRHDCMT            | TVGLINHLVKNKISPPQEQKEAN                | ----                            | EMPPWMSYLHKKLS--HSSSEL  | 2109              |      |
| STONYCORAL  | 2102 | QTD---                | DWYEVSEDTLEMDDLNRHESMA   | KMISLLKHLVKKISPEQVKDVPP                | ----                            | DMPAWMAPLHKKIA--SSSTHL  | 2171              |      |
| ACORN WORM  | 2107 | [4]SLLppsAFVKGDYLE    | MEMDELNLHCECMS           | NMTALLKHMQRNNITPKVDEEGTVPA             | ----                            | ELPGYMSYLQKCLS--GPSNTP  | 2183              |      |
| LANCELET    | 2098 | [4]QQQdssVNIHGDFLE    | IEMDELNQHECMS            | MSAVALKHMQRNNITPKVDEEGTVPA             | ----                            | DMPWMSCLNKKLG--GSSTHK   | 2174              |      |
| SEA URCHIN  | 2098 | [7]QDSkpVSPGGEYLE     | EMBEDALNQHECMA           | AMTGLVLMQRNNITPKVDEEGTVPA              | ----                            | EMPPWMSGLQKCLS--SQSTEH  | 2177              |      |
| STARFISH    | 2115 | [4]NEBtpVTVVQGEYIE    | MESDALNQHECMA            | SLTAVLKHMQANKITPEIPEGKAS               | ----                            | EMPPWMSLQKCLT--SQSTHV   | 2191              |      |
| TERMITE     | 2097 | NIRLFLKILINLVESKFPY   | AHHMNSILKAIT             | DGVV                                   | --GRAPNYLLSDTVAMLADWCRKT        | TSLPAKSDHHL-V           | 2167              |      |
| SHRIMP      | 2114 | NVKLFLLRVMNNA         | RIPEYAAHFVSTILTCV        | DGTI                                   | --GDKINYFFCDVMVMVWGSKA          | VPQDVTMGRNI-V           | 2184              |      |
| SCORPION    | 2112 | NIKLFLTKFLINNAE       | IFKPYAVFLQLPLINLIL       | NATF                                   | --GREINYLFLDLMLVLLSWSSIA        | IPEDSSIGRHA-A           | 2182              |      |
| ALVINELLA   | 2087 | NTRLFLVKLIINTE        | EVFKPYAKDWFGLVQIIT       | RGDL                                   | G--TNGINYMISDLTITLLSWHTVA       | IPEDNSADKAM-A           | 2158              |      |
| CAPITELLA   | 2140 | NIRLFLAKVILNG         | ESVFRPYASFQPLVALAT       | --NM                                   | G---GLNYFSLDIIVTLLSWHEIA        | IPETTVDIAM-T            | 2207              |      |
| SPONGE      | 2158 | NIKLFLVRLITNR         | PKIFQPYAKHWLPLVTFQIL     | SGDS[9]                                | GgENGLDYFTVDAIATMLSWSSIA        | ----IEDRFL-G            | 2235              |      |
| OYSTER      | 2138 | NIKYFITKLIINT         | AEIFRYPYARDWIRPLTQIIL    | SG--                                   | L--FTGLNYFVIDVITMSHWQVA         | IPQDVTEDRAM-S           | 2207              |      |
| SNAIL       | 2139 | NIRLFLAKLIINT         | SEIFQPFARLWLRPLCQIIL     | STSL                                   | C--DNGINYFIMDLLVTLMSWSSIA       | TVAPQNSSTERAM-A         | 2210              |      |
| TRICHOPLAX  | 2133 | NIKLFLIAKLIINR        | PKIFRYPYAKFWLPLIQLIV     | -EGK                                   | E--SDGIHYFIVDLMIILLSWADVA       | IPKDV--DEILqA           | 2202              |      |
| SEA ANEMONE | 2134 | NIQLFIAKVIINQ         | SQVFEYARFWSPLMELIL       | [4]EEGE                                | N--KRLNYFVVDLLVTLWSWATTA        | IPEDSYGRHL-A            | 2209              |      |
| PRIAPULA    | 2162 | NVRVFIARLVVLC         | AHAFRCPAASWLAPMLHLV      | NGNC                                   | GVAIAIHSLTADVVVVLWSWTPV         | ARPQDNMTERSL-A          | 2234              |      |
| ESHARK      | 2150 | NIRLFLIAKLIINTE       | EEVFRPYAKEWLGPLLQVIV     | SGNN                                   | G--GDGIHYMVVEIVVTVLSWTSVA       | TPKGNMKDEIL-A           | 2221              |      |
| STERLET     | 2164 | NIKLFLIAKLIINTE       | EEVFRPYAKHWLGPLLQVIV     | SGNN                                   | G--GEGIHYMVVEIVVTVLSWTSVA       | TPKGNTRDEIL-A           | 2235              |      |
| COELACANTH  | 2152 | NIRLFLIAKLIINTE       | EEVFRPYAKHWLGPLLQVIV     | SGNN                                   | G--GEGIHYMVVEIVVTVLSWANIA       | PAKGNTRDEIL-A           | 2223              |      |
| HUMAN       | 2141 | NIRLFLAKLIVINTE       | EEVFRPYAKHWLGPLLQVIA     | SENN                                   | G--GEGIHYMVVEIVATILSWTGLA       | TPTGVPKDEVL-A           | 2212              |      |
| CAECILIAN   | 2154 | NIRLFLIAKLIANT        | EDVFRPYAKQWGLPLLQVIV     | SGNN                                   | G--GDGIHYMVVEIVVTVLSWANVA       | TAPAGLAKDEIL-A          | 2225              |      |
| PLATYPUS    | 2145 | NIRLFLAKLIANT         | EEVFRPYAKHWLGPLLQVIV     | SGEN                                   | G--GEGIHYMVVEIVATVLSWTSIA       | TPTGVTKDELL-A           | 2216              |      |
| CANARY      | 2143 | NIRLFLIAKLIINTE       | EDVFRPYAKHWLGPLLQVIV     | SGNN                                   | G--GEGIHYMVVEIVVTVLSWTSVA       | TPKGNIKDEIL-A           | 2214              |      |
| OSTRICH     | 2113 | NIRLFLIAKLIANT        | EDVFRPYAKQWGLPLLQVIV     | SGNN                                   | G--GEGIHYMVVEIVVTVLSWTSVA       | TPKGNIKDEIL-A           | 2184              |      |
| TURTLE      | 2152 | NIRLFLAKLIVINTE       | EEVFRPYARQWGLPLLQVIV     | SRDN                                   | G--GEGIHYMVVEIVVTVLSWTSVA       | APKGNIKDEIL-A           | 2223              |      |
| ALLIGATOR   | 2110 | NIRLFLAKLIVINTE       | EEVFRPYAKHWLGPLLQVIV     | SRDN                                   | G--GEGIHYMVVEIVVTVLSWTSVA       | SPKGNVDEIL-A            | 2181              |      |
| SOFTCORAL   | 2150 | NVRLFLIAKLIINTE       | PEVFEYAKFWLDSLMELIL      | LPTF                                   | K--NSLNYFVIDVITMSHWSSV          | TIPEDSYSSRRL-T          | 2221              |      |
| STONYCORAL  | 2172 | NIRLFLIAKLIINTE       | AKIFEAHAKFWNPLMELIL      | [4]TEPA                                | G--TEGINYFIVDLVTVLSWSTAI        | IPEDSHNDRHL-A           | 2247              |      |
| ACORN WORM  | 2184 | NVKLFLIAKLIINTE       | EEVFRPYAKFWLAPLMEWIL     | GGQT                                   | G--GDGIHYMIGDIVVLMVLSWATTA      | IPEDSAMGRAL-A           | 2253              |      |
| LANCELET    | 2175 | NVKLFLAKLIVINTE       | EEVFRPYARFWSPLMELIL      | RGEA                                   | S--GEGINYFIVDLVTVLSWGPVA        | IPEDSAMGRAL-T           | 2246              |      |
| SEA URCHIN  | 2178 | NIKLFLIAKLIINTE       | EEVFRPYARFWSPLMQFLA      | GGQQ                                   | G---GINYMLDMLVMLSWSTVA          | PE---DNRL-A             | 2243              |      |
| STARFISH    | 2192 | NIKLFLIAKLIINTE       | EEVFRPYARFWSGLLQVILI     | SGNT                                   | G--GEGIHYMVVDVVVLLGWVVA         | PE---DKRL-A             | 2259              |      |

Supplementary Figure 3: DNA-PKcs COBALT Metazoa Vertebrate Invertebrate

|             |      |                                                                                    |      |
|-------------|------|------------------------------------------------------------------------------------|------|
| TERMITE     | 2168 | SQLLYLLISKVHDDRDRVFKHNLELIRTVVLELWKNPFDIPVQLLYDMIMKH--RKDPTVsepGIQVAAILANRLEPWS    | 2245 |
| SHRIMP      | 2185 | GRVLYRLCMNTPQTRADIFKYNLDVVRVSVVECKWSLLTPVYTVIYSLMEVKGDAEREVBA---GLQLLGIILANGLPPYT  | 2261 |
| SCORPION    | 2183 | SGLLEFLMSKCFHIRRDRVFRNNLEMIKTVQVCWKERLDIPTIYIFESMRNLDTKVKDNIV---GIQLFGIVVSNGLDPPYQ | 2259 |
| ALVINELLA   | 2159 | CQLLKVLVASCHHDSQQILKNNLELLKVLVEVWKPRLVPTNIIYENFSDYDLKTKRNM---GIQMTGVILANGLSPYR     | 2235 |
| CAPITELLA   | 2208 | SHLVKIVYQNCYHQNRQIMRNNLEVLKTLVEAKWSTRIPTQDIYENFIDREDKGRKRVV---GLQIVGVFLANGLSPWQ    | 2284 |
| SPONGE      | 2236 | SQLEIYMLRSNHNKRSILRNNLEIVRTMVELWKKDIDIPTRVLYDQFNSDKSTVSNLS---GIQLVGIIVANGLNPPYD    | 2312 |
| OYSTER      | 2208 | SRLVEFVMGYFYNDTRPVYRNNLELLKTLQVWKRDEIPYNIIVYKHLKQDDETKKESCV---GIQLMGVVLSAKFPFYA    | 2284 |
| SNAIL       | 2211 | SRLVEFLVVRNHHETRAIRNNLEMLKTLLECWKDCIEIPYQEVYNQLKMPDPSKSSLI---GIQLVGVIMTNCNYPYQ     | 2287 |
| TRICHOPLAX  | 2203 | NRLMEFLMRNAFYPNRSVLRNNEIEIKTAVELWKNHIEIPYRIYKNFSGPKDKKDNST---GIQCLGLVAVANGLSPYR    | 2279 |
| SEA ANEMONE | 2210 | SRLQVTMRTRHHENRVAVKNNLEIVKTMVEVWRERVTVPKVIYEALSNPHDKKDNAT---GIQLLGVVLANKIHPPS      | 2286 |
| PRIAPULA    | 2235 | SRLLEFLMRNARHATMVFRRNNEIEIKTLVECWDRDVPVQVIYENMCAGDITMRDNSV---GVQLLGVVAVANGLNPPYS   | 2311 |
| ESHARK      | 2222 | NRLLEFLMKNSFHEKTAVFRHNLEIKTVEVCKWDCLSVPSYSLIFSRFSSDTPNSKDNV---GIQLLGIIVLANGLSPYV   | 2298 |
| STERLET     | 2236 | NRLLEFLMKNAFYDKRAVFRHNLEIKTVEVCKWDCIAPVYSLIFDRFSGKDPNSKNSV---GIQLLGIIVLANGLNPPYD   | 2312 |
| COELACANTH  | 2224 | NRLLEFLMKNAFYDKRAVFRHNLEIKTVEVCKWDCIAPVYSLYQRFSGKDPNTKDNV---GIQLLGIIVLANGLNPPH     | 2300 |
| HUMAN       | 2213 | NRLLEFLMKNVFHKRAVFRHNLEIKTVEVCKWDCIAPYRILFEKFSGKDPNSKNSV---GIQLLGIIVMANGLNPPYD     | 2289 |
| CAECILIAN   | 2226 | NRLLEFLVTHSFHEKRAVFRHNLEIKTVEVCKWDCIAPYRILFIFERFSGNTNSKNSV---GIQLLGLIIVANGLNPPYD   | 2302 |
| PLATYPUS    | 2217 | NRLLEFLMKNVFHKRAVFRHNLEIKTVEVCKWDCIAPYRILFIFERFSGDPTKDNV---GIQLLGIIVANGLNPPYD      | 2293 |
| CANARY      | 2215 | NRLLEFLMKNAFHKRAVFRHNLEIKTVEVCKWDCIAPYSLIFQRFSSGDPDKDNV---GIQLLGIIVANGLNPPYD       | 2291 |
| OSTRICH     | 2185 | NRLLEFLMKNAFHKRAVFRHNLEIKTVEVCKWDCIAPYRILFIFERFSGDPTKDNV---GIQLLGIIVANGLNPPYD      | 2261 |
| TURTLE      | 2224 | NRLLEFLMKNVFHKRAVFRHNLEIKTVEVCKWDCIAPYRILFEQFSGDPTKDNV---GIQLLGIIVANGLNPPYD        | 2300 |
| ALLIGATOR   | 2182 | NRLLEFLMKNTFHQKRAVFRHNLEIKTVEVCKWDCITVVPYRILFIEQFSGDPTKDNV---GIQLLGIIVANGLNPPYD    | 2258 |
| SOFTCORAL   | 2222 | SRLLEYLMECTNHPTRSIFKNNLEIKTVEVWKEIDVPYKLIYERFNSAVMTKNSV---GIQLMGVIVANKITPPK        | 2298 |
| STONYCORAL  | 2248 | SRLLEFLMSRTRHRSLFRNNLEIVKSVVEIKWSILHVAEVIENSFSDPVPKKNVAV---GIQLLGVVAVANGLFPYT      | 2324 |
| ACORN WORM  | 2254 | SRLVEFLMHHTHSNRQVLRNNEIMVKTVEVWKRDEIPVSRVIFEFASGDKPKKENAT---GIQLLGVILSNQLPPYR      | 2330 |
| LANCELET    | 2247 | SRLLEFLMANAFHKRAVFRHNLEIKTAVECWKTRVVEPTKVIHQDLQCGSDASKANSV---GIQLLGVVAVANGLNPPYD   | 2323 |
| SEA URCHIN  | 2244 | SGVLFRLMKNSYHERKAVMKNLEVIKTLVECWKEIISVPTSVIYRIIATPDPDKDSSV---GIHLGLVILANGLHPLS     | 2320 |
| STARFISH    | 2260 | NRLLEFLMHFCHHSNRQVLRNNEIMIKTLVECWKEIISVPTSVIYRIIATPDPDKDSSV---GIQLLGIIVANGLHPLD    | 2336 |
| TERMITE     | 2246 | STGKl----QFLRALLRNIDT-EKRSIFQSSAEVAGMALELLAANGSGMLEGD[2]EPLSGIVDKLNLTKDQs---KDK    | 2315 |
| SHRIMP      | 2262 | VDSEt---EKKRCSLVIRLLGahYASVYGAAEVMGLLKYTSQ-KDGSVEAL[1]---DAVVKRVTELVTKm---QQQ      | 2329 |
| SCORPION    | 2260 | NTSR--IDKISYKTLTVNLKN-KYKEIYESASEVCGMSMKYYP-KDDVYSE -FKIKVKTEISSLNAK----DQ         | 2326 |
| ALVINELLA   | 2236 | PNSG--VDKDRFYKNAKMNQH-TSKAVYMSAEVVGMAKHMTE-TEKEEDDK[4]EPIFDHISSSLIGFQSN---KPRD     | 2309 |
| CAPITELLA   | 2285 | PDAE--VSKDRFYQYLAMNMQ-PDKQVYASAEVVGMAKSSLQNT-TESDKEWC[1]AYGDNIQKMLLGIHGN---KPPQ    | 2355 |
| SPONGE      | 2313 | TNTAgsLDQGLYKYIFVNNLTF-KYKLIYAAAAEVLGMKMRMAESYDPPFLDR[1]---EMVGEQLFKLSQPLekSSEK    | 2386 |
| OYSTER      | 2285 | PTAP--VDQEKFFTTVAQYMRN-RYKAVYATAAEVVGMIFFKHLAE-KDRQTEGT -FHDVYVNLMMNSLQ--q-sNPGN   | 2353 |
| SNAIL       | 2288 | PSAS--VDRNRYFTTLASSMTN-SSKMIFAAAAEVVGMYFAYLAD-KENETDGO -FHSVHVESVLGKVA-----PHN     | 2353 |
| TRICHOPLAX  | 2280 | YDVE--VDE---MLATAENLQF-KYKEVYEAVAEVLGMKMLHLS-VKKELEG -PIFDYVTQHLSSMVSAGrmDVAR      | 2348 |
| SEA ANEMONE | 2286 | PDSS--VDENRYFYTAISDNLTF-KYKDVHAAAEVVGMLMKYLIIE-ERKVTEC- SLIALVEAKLSPMATKggkDIGK    | 2358 |
| PRIAPULA    | 2312 | HTTA--VDSEKFFQALVRCLAN-KYKEVYAAAAEVLGMLLHRMVEEEDDEAEGA -LRDAVVTAMSTLH--a-dAKNQ     | 2381 |
| ESHARK      | 2299 | PKCE--IGYERYFQRLVYNIISLTRYKEVYAAAAEVLGMLLHYFAE-NEKQVDDG- LVHDLIAKELKQLQSS---KEDK   | 2368 |
| STERLET     | 2313 | PKCG--IDSESYFQALATNISFgRFKDIYAAAAEVLGLIMQYLAKE-NEKQLEG- PIFDPTVKELKHLQNT---KEDK    | 2382 |
| COELACANTH  | 2301 | PTCS--IDMESYKALANNSLFTRYKEVYAAAAEVLGLVLYRAE-KEKELGG- PIIDSVVRELKQLQSI---KEDK       | 2370 |
| HUMAN       | 2290 | PCGG--IQSSEYFQALVNNMSFVRYKEVYAAAAEVLGMLLRYVME-RKNILEE- SLCELVAQQLKQHNT---MEDK      | 2359 |
| CAECILIAN   | 2303 | PKCG--IDVERYFQALANNIALTKYKDIYAAAAEVLGLALHYVAE-KEKTELEG- PLFDCVVKELKQHNA---KEDK     | 2372 |
| PLATYPUS    | 2294 | PKCG--IDSARYFQALANNSLVKYKEVYAAAAEVLGMLLQYVSE-KETMLD- SICEILIVKQLKQHNS---REDK       | 2363 |
| CANARY      | 2292 | PKCE--IDRVRYFQALTSNMLKYREVYAAAAEVLGLALQYIAE-RENILED- PVYDCVVKQLKQHNT---QHDK        | 2361 |
| OSTRICH     | 2262 | PKCE--IDRVRYFQALISNMLKYREVYAAAAEVLGLALRYVAE-RENILED- PAYDCVVKQLKQHNT---QDDK        | 2331 |
| TURTLE      | 2301 | PKCE--IDSVRYFQALANNSLRYKEVYAAAAEVLGMLLQYMAE-KENIFEG- PVYDCVVKRIEQHNT---KEDK        | 2370 |
| ALLIGATOR   | 2259 | PKCG--IDSTRYFQALVNNMALKYREVYAAAAEVLGMLLRYIAE-KENITEG- PIYDCVVKQLKQHNT---KEDK       | 2328 |
| SOFTCORAL   | 2299 | PCGG--VDEKRFYQDLVKNLSF-KYKDVHAAAAEVLGMLLKYLSE-END-KESC[1]GLSGLLNEKLSMT---kDLK      | 2367 |
| STONYCORAL  | 2325 | SDST--IDEDRFYGLVNNLTF-KYKDVHAAAAEVLGLMMQLAK-VKKIFDG- PLHDMVQGLKLSLVNRakpELDK       | 2396 |
| ACORN WORM  | 2331 | DTCC--IDKDRFYTTLSANLSF-KYKDVYAAAEVVG-VMKYMAE-KEKVTDGT -FHDNVFREISSQ--s-sRPEV       | 2398 |
| LANCELET    | 2324 | PSTsgnIDREQFFSAVAKNLQLTRYKDVYAAAEVVGMLMKYMAE-VEKVTEGS -FHTQVERYLLPLQ--v-nQQDV      | 2395 |
| SEA URCHIN  | 2321 | PTCD--VDADRIFYSALASNIDN-RYKAVHAAAAEVLGMAMKQMAE-NDKITDGR -LHEVTYKELSQLHLSg-gKEVI    | 2391 |
| STARFISH    | 2337 | KASD--IDEEFYAALSYNLKN-RYKMHAAAAEVLGMAMKQKAD-VDKVTDGF -LHSIVTSELTKI--Se-ikPDV       | 2405 |
| TERMITE     | 2316 | FLTCLFAVQYYPRIVDA -FMNHVLFHLPKTYGIFRTMCKLIVYSRLEILgDDTYAEMKSKNLFKTLSDRDPDQQN       | 2390 |
| SHRIMP      | 2330 | GLTCIYNIHKHYPFVFR -LINKLNLPLKLYGHRKNVLECLIAHSATM-EDIYHLKQNLLDILAKKEASTQL           | 2403 |
| SCORPION    | 2327 | YLTCLYKINHTHPIFIDS[1]-FLNKILYMLPNEVHGLFRKQILEIINSHVENI-ENAFELKNQNLNMLHRDESIFQ      | 2401 |
| ALVINELLA   | 2310 | FISCVYGMQLHPPTIADG -FLAKVLFILPKVHGFEKTHSLEILQNRISQI-DNAFLEMKSGISDILSRNEANQH        | 2383 |
| CAPITELLA   | 2356 | FLTCVHCIQKHFSAFVER -FIHKVLFMLPGLYGVFRYALBIIAAGIENI-EGAFVEIKNNKIGILRERDELSQL        | 2429 |
| SPONGE      | 2387 | FITCLHKITLCKYKNIIVPR -FVEKLLFLLPSLQGVFRSSCLEILDTQADVQ-PQFYLKLDKGFHTMI SHRDEATQT    | 2460 |
| OYSTER      | 2354 | FLLCIHRMHLHYPPIADR -FMNRLFLVLPNLHAEFRNRNLEIVLTRIDTL-ENVVYELKSGKGLAFILTHRDEATQV     | 2427 |
| SNAIL       | 2354 | FLLCVHCIIHRHYPPMADR -FLNKLFLMPLGLHGEFRVQCLEVIMGCIEQL-DDAFRELQSKGLLNLFRDEDTQI       | 2427 |
| TRICHOPLAX  | 2349 | FILCLYRVQLHYPIIAD- RFVNKVLFLMPSLYGFEKTKCLEIILARADHI-KELYTELNRNGLKDMFLHRDESKOQ      | 2422 |
| SEA ANEMONE | 2359 | FITCVHRLQLNYPRIVD- RFMKHIMFHLPTIHGVFKAQCLEIVLSRVSDI-PDLFTELRSKGLNVMFHRDEGVQV       | 2432 |
| PRIAPULA    | 2382 | FIVCLQKMTLHYPAIADR[17]RLMSKLLFMLPSLQGSFRSQCLEVILTRVAHT-QNLFLELKSGLFLGMITHRDEATQL   | 2473 |
| ESHARK      | 2369 | FIVCLSKIVKNYPPFADR RFLNQVFYLLPKLHGVLKTHCLEVVMHRAETI-IDIFQELKNKNFVQIMSYSDERQR       | 2443 |
| STERLET     | 2383 | FVECLSKVKNYPPFLVD- RFLNAVFLFLPKLHGVLKTHCLEVIMHRAEVE-TDIYQLKSKDFQAQIMSHRDEMRQR      | 2456 |
| COELACANTH  | 2371 | FIVCLSKIVKNFALLAD- RFMSVVFLLPKLHGVLKTHCLEVVMHRAEVEI-PDIFLQKSKDFIQLMNRDARQR         | 2444 |
| HUMAN       | 2360 | FIVCLNKVTKSPPLAD- RFMNAVFFLLPKLHGVLKTHCLEVVMHRAEVEI-TDYFLQKSKDFVQVMRHRDDEQR        | 2433 |
| CAECILIAN   | 2373 | FIMCLNKVKNFSPPLAD- RFMTVVFLPKLHGVLKTHCLEVVMHRAEVEI-PDYIQLKSKDFNQIMSHRDDRQK         | 2446 |
| PLATYPUS    | 2364 | FIVCLNKVKNFSPPLAD- RFLNAVFFLLPKLHGVMKTFCLEVVMHRAEVEI-TDYIQLKSKDFQAQVMRHRDDEQR      | 2437 |
| CANARY      | 2362 | FIVCLNKVKNFSPPLAD- RFMNAVFFLLPKLHGVMKTYCLEVIMHRAEVEI-PDLHLQKSKDFIQLMNRDDEQR        | 2435 |
| OSTRICH     | 2332 | FIVCLSKVKNFSPPLAD- RFMSAVFFLLPKLHGVMKTHCLEVIMHRAEVEI-TDLHLQKSKDFIQLMNRDDEQR        | 2405 |
| TURTLE      | 2371 | FIVCLNKVKNFSPPLAD- RFMNAVFFLLPKLHGVLKTYCLEVVMHRAEVEI-TDYIQLKSKDFIQLMNRDDEQR        | 2444 |
| ALLIGATOR   | 2329 | FIVCLNKVKNFSPVAD- RFINAVFFLLPKLHGVLKTHCLEVVMHRAEVEI-TDYIQLKSKDFMQVMNRDDEQR         | 2402 |
| SOFTCORAL   | 2368 | FILCVHQLQIHPPYIVD- GFINQILFVQVHVAQFKTLCLEIILSRVGI-PNLFLELTKGFLNLTTHRDEATQV         | 2441 |
| STONYCORAL  | 2397 | FITCVHKLKNYPPIADR- RFVNQILFLLPSVHGDFKSYCLEILCSRVHI-PNLFTELKGRGLKEMLSQRDDGIQI       | 2470 |
| ACORN WORM  | 2399 | FITCIYKVOQLYKFPTR- -FINKLFLMPLQIHGQPKTYALEVVLGRVDSI-DKIFLEMKNKRIEMLRHRDETITQL      | 2472 |
| LANCELET    | 2396 | FLTCVHKIHLHPPFADR- -FVSKLFLMPLKHLGFRTHCLEVIRGRVNI-DNLFLELTKRNLFLMGLTHRDDGLQA       | 2469 |
| SEA URCHIN  | 2392 | FITCLHKIHLHYPPFTR- -FMNKLFLMPLSHHGQPKTECLQITARIEHI-DNAFLEMKNKILALLTHKDEADQL        | 2465 |
| STARFISH    | 2406 | FVTCIHKIHLHYFPEADR- -FTNKLFLMPLSHHGQPKTLCLEVVASRVSHI-PNIFLEMKSKGIVELLTHRDEGTQL     | 2479 |

Supplementary Figure 3: DNA-PKcs COBALT Metazoa Vertebrate Invertebrate

|             |      |                                                                                        |      |
|-------------|------|----------------------------------------------------------------------------------------|------|
| TERMITE     | 2391 | LALSIVHKMVPHLKPEQLEELVHE-ICKFETQRSVKCRSVMYBILKWIYDHC-----QDi--GGVLEIEAKGILLK           | 2458 |
| SHRIMP      | 2404 | VALQLVNAVMPRLTPSQQLYFMPG-VVAFASHAPASCRTMYDVLFWVYDNF-----SNNDTE--GGHQLSEQARGVLLR        | 2475 |
| SCORPION    | 2402 | SSLNIIQKLLKELDIKMLNVFPI-ISKVHKSABETICRKYMYEIMMHAYEKF-----NTKNGik-EKEISRYAKEMLLH        | 2473 |
| ALVINELLA   | 2384 | AALRLVKGLCNQKPKPAEILYLLPV-LTEFASHPSASCRAQMYNMLMWIYDNY-RDDGDTDEQ-----IIQSVKETLLR        | 2455 |
| CAPITELLA   | 2430 | MSLKIIRLLEKLEASQLLYLLPA-ICEISDLSSVLCRRMYQLMWCYDNY--KDEAQSESr---DEIITLTKDVLRLR          | 2502 |
| SPONGE      | 2461 | ASLSIVQKLLVQLTNDQLSEIVPILIASFSKHGSIQCRIVLYNLMRVYNKLCtDDQSESDDsv---KMIRSIIRDQLLL        | 2537 |
| OYSTER      | 2428 | IALKIVKSIQSLQPSVSELLPL-TCGFSVSPSPICRQVMYDILMWIYDNY-REDESET--A-----DTIMQQTKESSLK        | 2499 |
| SNAIL       | 2428 | VALGIVNAVMPKLSATLQTFLLPA-ITGFSNHPSVTCRQIMMKILMWIYDNY-RDNESKE--G----QEIMKVQTESLLQ       | 2499 |
| TRICHOPLAX  | 2423 | VSLDLVRAMLKNDISQILYLAEI-VATFKTNPSAACRQKMYGIFMWIYDTF-RQEDKNDKDE---TKQLINFCKDQLLQ        | 2496 |
| SEA ANEMONE | 2433 | ALLKIIQGLLEKLMSEIEYVVPV-IATMATSSSTACRELIIYDIFMWVYDTY-RSDETFRNE--egSEEILATAKDYLLR       | 2508 |
| PRIAPULA    | 2474 | ASLHITNALLSSLSPEGLLFLPA-VTSGTHPRAPCRQLMYDILMWVYDYSV-RDSEGEeE-----DKLASLARDSLLO         | 2545 |
| ESHARK      | 2444 | ICLDIVYKIIAKLKAEEVKVFLVP-VIAFISHPSVPCRERMYDILMWIYDNY-RDAESQSDPD---SKAVFVTTKDTLLQ       | 2518 |
| STERLET     | 2457 | VCLDIVHKILAKLKFVVKELLIS-VTAFITHTPSVPCRERMYDILMWIHDNY-RDPESQSDSV---STEVFNLAKEITLLO      | 2531 |
| COELACANTH  | 2445 | VSLDIVYKMLKPKPELRELLNP-VTGFISHPSVPCRERMYDILMWIHDNY-RDPESQANNE---SREVFLKASEVLLQ         | 2519 |
| HUMAN       | 2434 | VCLDIIYKMKPKLKPVELRELLNP-VVEFVSHPSVTCRQMYNMLMWIHDNY-RDPESQDND---SQEIFKLAKDVLIO         | 2508 |
| CAECILIAN   | 2447 | VCLDIIYKMLKPKPELRELLNP-VVTFSSHPSVPCRERMYDILMWIYDNY-RDPESQANDD---SQEVFSRANDVLLQ         | 2521 |
| PLATYPUS    | 2438 | VCLDIIYKMLKPKPELRELLNP-VVEFISHPSVPCRERMYNMLMWIHDNY-RDPESQADEE---SREVFLKAKEILLQ         | 2512 |
| CANARY      | 2436 | VCLDIVYKMLKPKPELRELLNP-VTGFISHPSVPCRERMYDILMWIYDNY-RDPESQADD---SREILKVAKEVLLQ          | 2510 |
| OSTRICH     | 2406 | VCLDIVYKMLKPKPELRELLNP-VTGFISHPTVPCRERMYDILMWIYDNY-RDPESQADGD---SQEVFLKAKEILLQ         | 2480 |
| TURTLE      | 2445 | VCLDIVYKMLKPKPELRELLNP-VTGFISHPSVPCRERMYDILMWIYDNY-RDPESQAEeE---SQEVFLKAKEMLLO         | 2519 |
| ALLIGATOR   | 2403 | VCLDIIYKMLKPKPELRELLNP-VTGFISHPSVPCRERMYDILMWIYDNY-RNSESQADE---SQEVFKVAKEMLIO          | 2477 |
| SOFTCORAL   | 2442 | ACLRIILGRLSQMSVGDIIQTLLPS-VTDFLSSKSVACRGLMFDILWIYDTY-RFDETFKNEDEsegSEdVLCRTKNVLLQ      | 2519 |
| STONYCORAL  | 2471 | GVLRILKMLKLPITPELKFIFPL-LTSFVSHPLNLCRDLMYDIFWIYDYSV-RAEAFQAE--egSADILADAKDHLLO         | 2546 |
| ACORN WORM  | 2473 | VSLKIVNSMLKPKPELRELLNP-VVFSKHLSPACRETYMIDILTWIYDNY-KDEESS--TA---A-EVLSMTKEILLQ         | 2544 |
| LANCELET    | 2470 | IVLQIYVALLQKLVKVELLYLLPS-VAAFASHAPECRRTMYDILMWIYDNY-REEASQQAESA---G-RVLTAKDCLLO        | 2543 |
| SEA URCHIN  | 2466 | VSLKLVDMGLPKPELRELLNP-VKDFVSHPSVPCRERTMYSILMWIYDNY-RDEDKREGQD---GDEALSIKADTLLQ         | 2540 |
| STARFISH    | 2480 | VSLKLVNAMLPNPKPELRELLNP-VRTVFNLPSVPCRERMYDILMWIYDNF-RDEESRTEDG---ADDLCMAKDTLLQ         | 2554 |
| TERMITE     | 2459 | GLRDDDPLQDSIFeYfnwSDAQORDASTDRLLFLITLDLYCPATEHIF                                       | 2534 |
| SHRIMP      | 2476 | AVKEEDAALRQIVLNFV--LQGARSMTLQCLLHILKRMYSPESEDSF                                        | 2549 |
| SCORPION    | 2474 | GLADSDLTRLRVHNFV--SQNNHLPAAETFSRIKAVLQKMYSPeIEHMF [39]                                 | 2587 |
| ALVINELLA   | 2456 | GLSDDKIKNRVTLQNFV--SHSTRLPDSTVDRIVALLEMTYSPASEHOY                                      | 2537 |
| CAPITELLA   | 2503 | GLSDDDLNRLLTVQNFV--SHETRLPGETVERIVAMLEAMYPSTELHY                                       | 2570 |
| SPONGE      | 2538 | GLGDESNEVKLKMYYEYV--NQESNLSNTLDRITQLLVLYSKKTETQF                                       | 2612 |
| OYSTER      | 2500 | GLGDEDMQCRLLVQNFV--SSETRVPGNTLDRIVAMLEAMYSVPEKQF                                       | 2574 |
| SNAIL       | 2500 | GLCDDNLHCRLLTMQNFV--SSESRLPDGTVDRMISILEAMYPGSECNY                                      | 2574 |
| TRICHOPLAX  | 2497 | GLNDSSEENRLQLNFV--SNNRRLPSTGLTERLSSVLYALYSNAESeF                                       | 2571 |
| SEA ANEMONE | 2509 | GLADDDNLRLKLVQNFV--SDETRLPNTTLERLVLVLRAMYSTNTEQOY                                      | 2583 |
| PRIAPULA    | 2546 | GLNDSDDSLRMVRFNFV--SHATRLPQTLLPRLLAIAQTLYSAPATEPHF                                     | 2620 |
| ESHARK      | 2519 | GLTDDMQLRLVQNFV--GHENRRLPTGTHDRIVAMLEAMYSNKIETQY                                       | 2593 |
| STERLET     | 2532 | GLTDENQGLQLVVRNFV--SHESRLPTSTLERMLVLRSLYSSKIEAHY                                       | 2606 |
| COELACANTH  | 2520 | GLTDENPGLQLVVRNFV--SDENRRLPVTGLDRMLVLLKAFYCNKIEQY                                      | 2594 |
| HUMAN       | 2509 | GLIDENPGLQLVVRNFV--SHETRLPNTLDRLLAL--NSLYSPKIEVHF                                      | 2582 |
| CAECILIAN   | 2522 | GLIDENAGQLVVRNFV--SDETRLPVVTTDRMLALLNSFYSPKIESHY                                       | 2596 |
| PLATYPUS    | 2513 | GLVDENMQCRLLVQNFV--SNETRLPNSILDRMLAL--NSFYSTKIEMHY                                     | 2586 |
| CANARY      | 2511 | GLIDENAEQLVVRNFV--SHETRLPNTLDRMLSLSSFYSTKIEIETHY                                       | 2585 |
| OSTRICH     | 2481 | GLTDENAEQLVVRNFV--SDETRLPANILDRMLALLNSFYSTKIEQY                                        | 2555 |
| TURTLE      | 2520 | GLMDENSGLQLVVRNFV--SDETRLPNTLDRMLALLNSLYSTKIEQY                                        | 2584 |
| ALLIGATOR   | 2478 | GLTDEISEQLVVRNFV--SDETRLPNTLDRMLALLNSFYSTKIEQY                                         | 2552 |
| SOFTCORAL   | 2520 | GLADENMQCRLLVQNFV--SDETRLPNSTLERLVLVLRAMYSPIESeY                                       | 2594 |
| STONYCORAL  | 2547 | GLADDDHRDLQLVVRNFV--SDEARLPSTGLTERLVEVLRALYSTTTEIY                                     | 2621 |
| ACORN WORM  | 2545 | GLSDEESYLRLVQNFV--SHETRLPVTGLDRMVSLECMYSPDAENQF                                        | 2619 |
| LANCELET    | 2544 | GLSDEESYLRLVQNFV--SHETRLPVTGLTERLVMLECMHSPTEPOY                                        | 2618 |
| SEA URCHIN  | 2541 | GLSDQDNYLRLVQNFV--SHETRLPKETLERLISMLGCMYSPGTENRY                                       | 2615 |
| STARFISH    | 2555 | GLSDEEASHRLVQNFV--SHETRLPVTGLTERLVMLECMYSPGTEHOY                                       | 2629 |
| TERMITE     | 2535 | KCQFEDF--RMLLSWRAQNAV--APMFADTLASQ----LIQTQ--SLSGTGEHT[5]--LRATQ--ASLAFQPTIE-----      | 2599 |
| SHRIMP      | 2550 | ECKFREEM--KVSTAWRARHASM--IPMFAETQASN--DTSLSNLLSYTQGSDTNME[4]AGVQATQ--ANVFSATQA-----PGA | 2622 |
| SCORPION    | 2588 | TCAFQNY--AISSSWKRRAHATL--TPWFVDSLSSA-----ASFSDTSVKN[3]--QIRSTV--DVREFDPTQD----QA       | 2649 |
| ALVINELLA   | 2531 | DKCFKDF--HVRQSWQRHSTM--TPMFVDTQSTQ-----TSSDGSDDGGSTSP[1]--QLRATQ--DVQQFTATQG---VGT     | 2595 |
| CAPITELLA   | 2578 | ECKFQDF--AVSSTWYQRHAAM--TPMFLDTQSSQ-----SNDSPDAGLS[1]GQLRATQ--DAAQFTATQA---DG          | 2638 |
| SPONGE      | 2613 | ECRFEDYkEIDLQSWQRHLQ--TPLFAATQLSQ-----TQSDTGSIG[1]GMLRATVqQSLAFTPTQD-----              | 2672 |
| OYSTER      | 2575 | DKCFQDY--NVKSSWQRHAAM--TPLFANTMATQ-----SMMD--DDESYSGE-- --IRATQ--DAQQFTATLD---A--      | 2633 |
| SNAIL       | 2575 | ECKFRDY--SVQSSWQRHAAM--TPLFAVTQGSQ-----TMED--VEDSLRGG-- --VRATV--DVEQFTATME---TG-      | 2634 |
| TRICHOPLAX  | 2572 | ECKFHDY--NVNYSWQYRHAMM--TPLFAATQLGS--QGSMA--SFLSGSSSTDE HLLRATQsTNLQFTPTQD---TDA       | 2640 |
| SEA ANEMONE | 2584 | ECKFBEEY--PIDYSWQRHVVM--TPLFAATQGS-----TQSHSQGGSLEP GALRATQ--LRVEFSPTMD---QSL          | 2645 |
| PRIAPULA    | 2621 | DKCFQDY--NIATSWQSRHAAL--TPLFTETQASQ-----ASSTQQTVA[5]GEIRATQ--VVPEFTATQD---VAG          | 2685 |
| ESHARK      | 2594 | ECKFQDY--NIDSSWQQRSTIL--TPMFVETQATQ--NSSRSQSEGLTAQGTIG GLVVRGTO--THYEFTPTQN---PDA      | 2663 |
| STERLET     | 2607 | DKCFQDY--IIDSNNWRHRSHTV--TPMFVETQVTV--GGTQYHTQDSP-- --QGTIG GQVRATQ--AQLEFTPTQA---AGR  | 2673 |
| COELACANTH  | 2595 | ECKFQDY--IIDSNNWRHRSHTV--TPMFVETQASQ--STARFRSQEGPEQVQGSILG GQVRATQ--VQFDFTPTQN---TGI   | 2664 |
| HUMAN       | 2583 | ECEFBQY--TIDSDWRFRSTV--TPMFVETQASQ--GTLQTRTQEGSLARWPVA GQIRATQ--QQHDFTLTQT---ADG       | 2652 |
| CAECILIAN   | 2597 | ECKFQDY--TIDSNWRYHSTV--TPMFVETQASL--SASRYRSQEGSFPAQSSLG GQVRATQ--QQYEFTPTQN---IGG      | 2666 |
| PLATYPUS    | 2587 | ECKFQDY--TIDSNWRFRTV--TPMFVETQASQ--SALRSRSQEGLLPQGQLL GQLRATQ--QYEFTPTQN---TDG         | 2655 |
| CANARY      | 2586 | ECKFQDF--VVDSSWRYRSTV--TPMFVETQASQ--STHRNLSQERSLSPSGSVR GQVRATQ--RQYEFTPTQH---GSG      | 2655 |
| OSTRICH     | 2556 | ECKFQDF--VIDSSWRYRSTV--TPLFVETQASQ--STHRNLSQERSLSPSGSGG GRVVRTQ--QQYEFTPTQN---ISG      | 2625 |
| TURTLE      | 2595 | ECRFQDF--TIDSNWRYRSTV--TPMFVETQATQ--SAKRNRSQEGSLSTQGSILG GQVRATQ--QQYEFTPTQN---VNG     | 2664 |
| ALLIGATOR   | 2553 | ECRFQDF--IIDSNNWRYRSTV--TPMFVETQASQ--SASRYRSQEGSLSTPGSQG AQRVATQ--QQYEFTPTQN---MSG     | 2622 |
| SOFTCORAL   | 2595 | ECKFQDY--EINFAWQQRNSTM--TPLFVSTLMP--GSSQS--SFGSHSMDIT--DG GQLRATQ--NPQFSMTQT---AGA     | 2661 |
| STONYCORAL  | 2622 | ECKFBEEY--QIDYSWQQRHLAIsTPMFVETQST-----QIGSDSQSFIETIG G--LRATQ--NLQFTPTQD---QRR        | 2687 |
| ACORN WORM  | 2620 | ECKFBEEY--QIDHSWKRRAHAAIsTPMFVETQST-----QIGSDSQSFIETIG NQVRATQ--DV--QFSATQE---VDG      | 2683 |
| LANCELET    | 2619 | ECRFQDY--QIDHSWKRRAHAAIsTPMFVETQST-----QIGSDSQSFIETIG GQLRATQ--DVLQFTATQA---SAA        | 2689 |
| SEA URCHIN  | 2616 | ACKFEGV--QIDHSWKRRAHAAIsTPKFVETQVQ-----SQSIRGSPSSQMSSTSSG[6]GQLRATQ--ATQNFATQD--naASS  | 2693 |
| STARFISH    | 2630 | ECRFQDY--TIDHSWQQRHLAIsTPMFVETQSSQ--ASSGSQSPPDSSLSR-- GEIRATQ--DAHQFIATQ1daVAS         | 2701 |

Supplementary Figure 3: DNA-PKcs COBALT Metazoa Vertebrate Invertebrate

|             |      |       |                                                            |                                                  |                    |                    |      |      |
|-------------|------|-------|------------------------------------------------------------|--------------------------------------------------|--------------------|--------------------|------|------|
| TERMITE     | 2600 | Q     | -----S-GSSIGSLP-FSLS                                       | -----SLLFTTGSFENQRKSY                            | KM                 | -GPGFGSSKLQ[3]EVS  | 2650 |      |
| SHRIMP      | 2623 | T     | --YNNVVT-DSTFTTLaDMEYE[2]                                  | HaPTQGSSTGLFNVGASGGQDRRRF[1]RP                   | ---                | GIGNSRMR -PA       | 2683 |      |
| SCORPION    | 2650 | S[1]  | KAFNWLT-QTSIDTLG-DWGSS                                     | -----STSSLLFTIGSDTKKINPID[4]NS                   | ---                | NQDTSKNKIE ---     | 2708 |      |
| ALVINELLA   | 2596 | S[1]  | GPYDWLT-QSSIDTFA-DSDVN                                     | --MSTETSSLLFTIGATSSKSPASH[1]QR[4]                | PGPRFQKHSLO[2]KAG  |                    | 2664 |      |
| CAPITELLA   | 2639 | S[2]  | GPYNWLT-QSSDLTFS-DSONL                                     | TlATQs-ESSLMFTVGSRIKSSKKT                        | -P                 | -GSEFGQKVR[3]---   | 2700 |      |
| SPONGE      | 2673 | Q[1]  | SSYNWMT--PSAQSV--DYSVP[2]                                  | TvGATPTSDSSLLFTRPT---MRPPL[1]NP[2]               | ---                | I SAERLG[4]SEG     | 2736 |      |
| OYSTER      | 2634 | S[1]  | JAFNWLT-GSSVDTFT-DY--S                                     | TvGSET-SSSLLFTVGTQDMALRTGL[4]K-                  |                    | PGPGFGRP---        | RAG  | 2694 |
| SNAIL       | 2635 | S[1]  | JAFNWLT-QSSDLTFA-DA--S                                     | LmETNS-LSSLLFTVGSSSKGDASKT[4]RH[4]               |                    | TGNSFNCKQMAR[2]RTG | 2705 |      |
| TRICHOPLAX  | 2641 | R     | ---NWLD-PSSVDKSIqSYAAF[5]                                  | SsTSETSSLLFLSSKSPRQRLQK                          | KP                 | LSKDFGQKLS[2]-TA   | 2707 |      |
| SEA ANEMONE | 2646 | S     | QAFDWLN-PSS-QAD--SV--[3]                                   | TvGSSSEAOSSLLFTGKPRASQRS--L                      | KP                 | VPHDFGSRRLA[2]-QS  | 2705 |      |
| PRIAPULA    | 2686 | G[1]  | STYNWLTqSSSIDTFA-DQSL                                      | SvSSISSSSSSPYSSPADHHEPT[1]--                     | ---                | AKRRG[4]EPR        | 2747 |      |
| ESHARK      | 2664 | R     | NFNWLT-GNSLDTFA-EYSLP                                      | SlASEPSSSSLLVFSRWSERLHRPAK                       | KP                 | VGPDFGKKRLA        | LPG  | 2745 |
| STERLET     | 2674 | R     | SSFNWLT-GSSIDTFS-EYSLP                                     | S-SADSVSSSSLLVFGKRDKSQAAR                        | KP                 | VGSDFGKKRLG        | LPG  | 2735 |
| COELACANTH  | 2665 | R     | SSFNWLT-GSSVDTFA-EYSLP                                     | S-SSESLSSLLAYGKRSEKSRAM                          | KP                 | VGPDFGKKRLA        | LPG  | 2726 |
| HUMAN       | 2653 | R     | SSFDWLT-GSSDPLV-DHTSP                                      | S-S-----DSSLFAHKRERLQRAPL                        | KS                 | VGPDFGKKRLG        | LPG  | 2709 |
| CAECILIAN   | 2667 | R     | NSFNWLT-GNSIDTFA-EYVGP                                     | S-SSESLSSLLFASKSEKSRRTSL                         | KP                 | LGNFVGKKRLG        | LPG  | 2728 |
| PLATYPUS    | 2656 | R     | NSFNWLT-GSSVDTFT-DYPGP                                     | T-SSESL--STLLFTHKKSRTQKAGF                       | KP                 | LGPNFVGKKRVG       | LPG  | 2716 |
| CANARY      | 2656 | R     | SSFNWLT-GSSIDTFA-EYAVP                                     | S-SSESLSSMLLVSKRSEKFKQATF                        | KP                 | VGPDFGKKRLG        | LPG  | 2717 |
| OSTRICH     | 2626 | R     | SSFNWLT-GNSIDTFA-EYMVP                                     | S-SSESLSSMLLVSKRSEKFKQSAF                        | KP                 | VGPDFGKKRLG        | LPG  | 2687 |
| TURTLE      | 2665 | R     | SSFNWLT-GSSIDTFA-EYTVP                                     | S-SSESLSSMLLVSKRSEKSRATL                         | KP                 | LGNFVGKKRLG        | LPG  | 2726 |
| ALLIGATOR   | 2623 | R     | KSFNWLT-GSSIDTFT-EYTVP                                     | S-SSESLSSMLLVFNKRSEKSRQRTL                       | KP                 | VGPNFVGKKRLG       | LPG  | 2684 |
| SOFTCORAL   | 2662 | T[4]  | QYYDWLN-PSSLDTS--QSS--[4]                                  | SvGSGQP--SSLLFKSNPNMRRFKT-L                      | RP                 | QSEQPSSTSA[3]DPS   | 2729 |      |
| STONYCORAL  | 2688 | S     | TAFDWLN-PTQ-ESNL-QPS--[3]                                  | AmASTQTSQSLLFSTQSHKRRKM-L                        | KP                 | VPDGFQSKLS[2]-SS   | 2750 |      |
| ACORN WORM  | 2684 | K[1]  | JAYNWLT-GSQ-DTFS-EFS-S                                     | StGTETSSLLFTIGTTKKAITR--                         | KP[1]              | -SSGFGDKMG[1]-GK   | 2744 |      |
| LANCELET    | 2690 | P[1]  | JAYNWLT-QSSDLTFA-DYS-V                                     | PlGTET-QSSLLFTTADSKKAKARR[1]KP[1]                |                    | -GPGFGSRLS[1]-GR   | 2752 |      |
| SEA URCHIN  | 2694 | H[1]  | JNGYNWLT-GSQ-DTFA-DYS-S                                    | S--SSASESSLLFTMGSLPK--RTAQ[3]GV[1]               | QDAGAGCS--         | RDK                | 2752 |      |
| STARFISH    | 2702 | R[1]  | JAYNWLT-GSQ-DTFA-DYS-T                                     | S--SASDQSSLLFTLGASKKMGRGQ[3]KT[1]                | TDAGFGKEKLQ[4]RGR  |                    | 2769 |      |
| TERMITE     | 2651 | DEVDS | -----RSDRLAPNLHRRFLRrD-                                    | DQKRIPHASREIQRSARQOELEQERGRLEANIASFREYRSGDFPDIEI |                    |                    | 2721 |      |
| SHRIMP      | 2684 | DEPDG | ----NdADTMQSKLIRRRFVKnQdREKQSIYFAKIEBRKSLREKLEKERKFRREAVQV | MYRQYRVGELPDVQI                                  |                    |                    | 2759 |      |
| SCORPION    | 2709 | -KLS  | -----SNTFHLRRRFLK-D-REKSLRHFIRMERKQQLRQEREKQKQREGQV        | TIYRQYIGDLPDIEI                                  |                    |                    | 2775 |      |
| ALVINELLA   | 2665 | NRNDS | -----DDGLEILQLKRRFLK-D-SGQSTAYFARREARQRAIREEIAQEQRR        | RENQVILYRKYRIGDLPDIEI                            |                    |                    | 2735 |      |
| CAPITELLA   | 2701 | -RVA  | -----MGEANKEIMRLKRRFLK-D-QBSTARFPMKRNVRMKMREIQREQKMKREH    | QVTVMYRQYRTGDFPDIEI                              |                    |                    | 2772 |      |
| SPONGE      | 2737 | GETPK | -----EKRRQVLQKRRALK-D-EMVTSFPMNREARMKMREELKQKRAARQS        | YVVMYRKYRMGELPDIEI                               |                    |                    | 2807 |      |
| OYSTER      | 2695 | ASSK  | PaERSRnEDQDSEMYLRRRFLR-D-EEQTKTYFIKRTRLEKMRREALREQKSRREH   | QVTVMYRKYRIGDLPDIEI                              |                    |                    | 2772 |      |
| SNAIL       | 2706 | NSAG  | PRNDNNTpDDEDN-VWKLRRRFLK-D-RSTASKYFARREIKKSKREERLQKQRL     | LRRENQVTLYRKYRIGDLPDIEI                          |                    |                    | 2782 |      |
| TRICHOPLAX  | 2708 | SQPS  | -QSVSQ--PSSSLNHLRRYIK-S-EMANNAYAKRERKQKQLEREEILKQKQI       | ARENQVTLYRKYRIGDLPDIEI                           |                    |                    | 2807 |      |
| SEA ANEMONE | 2706 | DSQA  | -TPAMG-SQQQEILRLKRRFLK-DsQTKDRQYFIRMHEKQRMLQQTOSRLKA       | ARESQVVMYRKYRAGDLPDIEI                           |                    |                    | 2782 |      |
| PRIAPULA    | 2748 | EESA  | -----agGGDVMLRRRFLK-D-EQKTRVFAARREARRKORREAEATLSR          | QREGQVVMYRKYRIGDLPDIEI                           |                    |                    | 2819 |      |
| ESHARK      | 2726 | DEVDS | -KTKGIvDQRADILRLRRRFLK-D-REKVSILFAKRGIREQRAEQKIKTEKMR      | ERDAKVTLYSYRFGDLPDIEI                            |                    |                    | 2802 |      |
| STERLET     | 2736 | DEVDS | -RTKVK-DQRADILRLRRRFLK-D-QEKVSLIYAKKGVREQKAKENVAEQ         | LKREAQVTLYSYRQDLPDIEI                            |                    |                    | 2811 |      |
| COELACANTH  | 2727 | DEVDS | -KIKGI-DQRADILRLRRRFLK-D-QEKVSLIYAKKGVREQKAKENVAEQ         | LKREAQVTLYSYRQDLPDIEI                            |                    |                    | 2802 |      |
| HUMAN       | 2710 | DEVDN | -KVGGA-AGRDLRLRRRFLK-D-QEKVSLIYAKKGVREQKAKENVAEQ           | LKREAQVTLYSYRQDLPDIEI                            |                    |                    | 2805 |      |
| CAECILIAN   | 2729 | DEVDS | -KARGI-DDRSDILRLRRRFLK-D-QEKVSLIYAKKGVREQKAKENVAEQ         | LKREAQVTLYSYRQDLPDIEI                            |                    |                    | 2784 |      |
| PLATYPUS    | 2717 | DEVDS | -KTKGI-EERTEILRLRRRFLK-D-QEKVSLIYAKKGVREQKAKENVAEQ         | LKREAQVTLYSYRQDLPDIEI                            |                    |                    | 2792 |      |
| CANARY      | 2718 | DEVDS | -KTKGI-EERABILRLRRRFLK-D-QEKVSLIYAKKGVREQKAKENVAEQ         | LKREAQVTLYSYRQDLPDIEI                            |                    |                    | 2793 |      |
| OSTRICH     | 2688 | DEVDS | -KIKGI-DEABILRLRRRFLK-D-QEKVSLIYAKKGVREQKAKENVAEQ          | LKREAQVTLYSYRQDLPDIEI                            |                    |                    | 2763 |      |
| TURTLE      | 2727 | DEVDS | -KARGI-DEABILRLRRRFLK-D-QEKVSLIYAKKGVREQKAKENVAEQ          | LKREAQVTLYSYRQDLPDIEI                            |                    |                    | 2802 |      |
| ALLIGATOR   | 2685 | DEVDS | -TTKDI-NERABILRLRRRFLK-D-QEKVSLIYAKKGVREQKAKENVAEQ         | LKREAQVTLYSYRQDLPDIEI                            |                    |                    | 2760 |      |
| SOFTCORAL   | 2730 | NENSS | -----QLQNIRLRRRFLK-D-RKETDVFYAKKIEARQKLRTE                 | SVQRQKVAARENQVTLYSYRQDLPDIEI                     |                    |                    | 2799 |      |
| STONYCORAL  | 2751 | SRSS  | -HQSDpNEKKEILKLRFLK-D-QSQSFAFFAKQALKRNFREALQKRA            | AREGAVVMYRKYRSGDLPDIEI                           |                    |                    | 2827 |      |
| ACORN WORM  | 2745 | QDQD  | -STEDTSQDRDILRLRRRFLK-D-QEASRFAFFARREIRLKKMREEAQKQ         | LRRHNMVTLYSYRQDLPDIEI                            |                    |                    | 2820 |      |
| LANCELET    | 2753 | QDQD  | GAAEDSgQS--EIMRLKRRFLK-D-QDVTKAYHARRQIRMOKMREEV            | KQRAKRGNLVTLYSYRQDLPDIEI                         |                    |                    | 2828 |      |
| SEA URCHIN  | 2753 | EARKA | -----PSeEG-KEVQLKRRFLK-D-QSSQSAFFAKRATRQKELRE              | EVQKSORREAVQVTVMYRQYRTGDPDIEI                    |                    |                    | 2828 |      |
| STARFISH    | 2770 | DEVDA | ----KQsGEDKKINRLRRRFLK-D-HSSQAYFARREMKRQKLEKILE            | EQREKFSVTVMYRKYRIGDLPDIEI                        |                    |                    | 2843 |      |
| TERMITE     | 2722 | SYS   | AIKPMQELAKRDAVARHLFVLLFDGLGELYD----                        | EKEYTQKVQKMGSIVSTTKDYTTVMYGAVMEIALCH             |                    |                    | 2796 |      |
| SHRIMP      | 2760 | PHRAL | IGLQALSQRDEKVARLLFVLAQGVINSAGTAMHHR                        | EEQWQELHEALNGILSSYMCCPQMLR                       | TVLHLMIN           |                    | 2839 |      |
| SCORPION    | 2776 | NYS   | SIIVPLQALAHDDIEICRMLFQSLILSVCCYKSNQV-                      | TEYSEFCRSLSSALNEILKKS                            | VHYHPQLVAFCEYCLNCD |                    | 2854 |      |
| ALVINELLA   | 2766 | EYFN  | IAPLQALQKSRMAMLLSLTFAIHAELVTVCA--                          | DNRSIHARISNSLNTMLSTTNQY                          | YAPFINCILHMAYS     |                    | 2813 |      |
| CAPITELLA   | 2773 | KYS   | FLIAPLQALQKSDTIKLLFVAVFQAIPTQIESEKTERE                     | SQSLVAKIESSLNKILETSTQY                           | SPFPGVLEIAYLF      |                    | 2852 |      |
| SPONGE      | 2808 | KHSE  | LIRPLQALAQKSDSLARLLFCSLFNSIFSQDLHTE                        | DAATKGVIEGNINTILDCSTQY                           | YPPFISGLDICYE      |                    | 2887 |      |
| OYSTER      | 2773 | KYS   | IAPLQAVAHDRSSVAKLLFCAIFKGFIPKMDVEK                         | TEREVQETIQIQKSGVVLTSIQY                          | TPFISCLLDVLYSL     |                    | 2852 |      |
| SNAIL       | 2783 | KYS   | IAPLQALAHDRNTIAKLLFCAIFKGFIPKMDVEK                         | TEREVQETIQIQKSGVVLTSIQY                          | TPFISCLLDVLYSL     |                    | 2852 |      |
| TRICHOPLAX  | 2783 | KHSE  | LIRPLQALQKSDSLARLLFCSLFNSIFSQDLHTE                         | DAATKGVIEGNINTILDCSTQY                           | YPPFISGLDICYE      |                    | 2887 |      |
| SEA ANEMONE | 2783 | KHSE  | LIRPLQALQKSDSLARLLFCSLFNSIFSQDLHTE                         | DAATKGVIEGNINTILDCSTQY                           | YPPFISGLDICYE      |                    | 2887 |      |
| PRIAPULA    | 2820 | QFCH  | LIRPLQALQKSDSLARLLFCSLFNSIFSQDLHTE                         | DAATKGVIEGNINTILDCSTQY                           | YPPFISGLDICYE      |                    | 2899 |      |
| ESHARK      | 2803 | KYS   | LIRPLQALQKSDSLARLLFCSLFNSIFSQDLHTE                         | DAATKGVIEGNINTILDCSTQY                           | YPPFISGLDICYE      |                    | 2881 |      |
| STERLET     | 2812 | QHS   | LIRPLQALQKSDSLARLLFCSLFNSIFSQDLHTE                         | DAATKGVIEGNINTILDCSTQY                           | YPPFISGLDICYE      |                    | 2891 |      |
| COELACANTH  | 2803 | HYS   | LIRPLQALQKSDSLARLLFCSLFNSIFSQDLHTE                         | DAATKGVIEGNINTILDCSTQY                           | YPPFISGLDICYE      |                    | 2882 |      |
| HUMAN       | 2786 | KHS   | LIRPLQALQKSDSLARLLFCSLFNSIFSQDLHTE                         | DAATKGVIEGNINTILDCSTQY                           | YPPFISGLDICYE      |                    | 2865 |      |
| CAECILIAN   | 2805 | AYS   | LIRPLQALQKSDSLARLLFCSLFNSIFSQDLHTE                         | DAATKGVIEGNINTILDCSTQY                           | YPPFISGLDICYE      |                    | 2884 |      |
| PLATYPUS    | 2793 | EHS   | LIRPLQALQKSDSLARLLFCSLFNSIFSQDLHTE                         | DAATKGVIEGNINTILDCSTQY                           | YPPFISGLDICYE      |                    | 2872 |      |
| CANARY      | 2794 | EYS   | LIRPLQALQKSDSLARLLFCSLFNSIFSQDLHTE                         | DAATKGVIEGNINTILDCSTQY                           | YPPFISGLDICYE      |                    | 2873 |      |
| OSTRICH     | 2764 | EYS   | LIRPLQALQKSDSLARLLFCSLFNSIFSQDLHTE                         | DAATKGVIEGNINTILDCSTQY                           | YPPFISGLDICYE      |                    | 2843 |      |
| TURTLE      | 2803 | EYS   | LIRPLQALQKSDSLARLLFCSLFNSIFSQDLHTE                         | DAATKGVIEGNINTILDCSTQY                           | YPPFISGLDICYE      |                    | 2882 |      |
| ALLIGATOR   | 2761 | EYS   | LIRPLQALQKSDSLARLLFCSLFNSIFSQDLHTE                         | DAATKGVIEGNINTILDCSTQY                           | YPPFISGLDICYE      |                    | 2840 |      |
| SOFTCORAL   | 2800 | KHS   | LIRPLQALQKSDSLARLLFCSLFNSIFSQDLHTE                         | DAATKGVIEGNINTILDCSTQY                           | YPPFISGLDICYE      |                    | 2879 |      |
| STONYCORAL  | 2828 | KYSE  | LIRPLQALQKSDSLARLLFCSLFNSIFSQDLHTE                         | DAATKGVIEGNINTILDCSTQY                           | YPPFISGLDICYE      |                    | 2907 |      |
| ACORN WORM  | 2821 | KHM   | LIRPLQALQKSDSLARLLFCSLFNSIFSQDLHTE                         | DAATKGVIEGNINTILDCSTQY                           | YPPFISGLDICYE      |                    | 2900 |      |
| LANCELET    | 2829 | KYS   | LIRPLQALQKSDSLARLLFCSLFNSIFSQDLHTE                         | DAATKGVIEGNINTILDCSTQY                           | YPPFISGLDICYE      |                    | 2908 |      |
| SEA URCHIN  | 2826 | KHS   | LIRPLQALQKSDSLARLLFCSLFNSIFSQDLHTE                         | DAATKGVIEGNINTILDCSTQY                           | YPPFISGLDICYE      |                    | 2905 |      |
| STARFISH    | 2844 | KYSD  | LIRPLQALQKSDSLARLLFCSLFNSIFSQDLHTE                         | DAATKGVIEGNINTILDCSTQY                           | YPPFISGLDICYE      |                    | 2923 |      |

Supplementary Figure 3: DNA-PKcs COBALT Metazoa Vertebrate Invertebrate

|             |      |                                                                                    |      |
|-------------|------|------------------------------------------------------------------------------------|------|
| TERMITE     | 2797 | SRYSITLQAEDITTVSRFSGLLALGCLSLLEEILIQKdTVSEAGSSKRKST---FEPSTeEILWLSLADLYKHMDEWVVVRG | 2873 |
| SHRIMP      | 2840 | D--VRNPESLTAACLGSRLEALGILVLERQALLSKRGEPPHARKMRKDAEALSQdDSLWLSIAEMYKLNMMWVVVRG      | 2917 |
| SCORPION    | 2855 | VKEMDDYDQICTASQASHKQSLGILLLEDDHLICynFKSSNPAAKRIKLNKFLISD-eLSIWLKMAEIKYKSLSDYDVSVHG | 2933 |
| ALVINELLA   | 2814 | IHNLTLEPNSISSACLGLQOPMGIMLLEKMLIHAeNPtCQPSKHHRTIGPQVSRD--INVWLELAKLYKSLGIDYDVLKG   | 2891 |
| CAPITELLA   | 2853 | PKQLKQPQGVSTVNCMSDQOPLGILLLEEGLLHS-PEDQSPAKSRSRDRSSRTQdTEPWELELAKLYKSLSDYDVLHG     | 2931 |
| SPONGE      | 2888 | NS-LKIKPPSITTSLSASKQEFTEGIMLLEKQLLNL--VDSKSAKRRTNKSNEVTE---TWIELARLYKSLSDYDVLHG    | 2961 |
| OYSTER      | 2853 | RSKLKVDVSDVSSAAMPNGIPLGICVLEEQLISQdED--ERPSKRGRSDNAV-VSTdTLWIELARLYKSLVKEVDVLLG    | 2929 |
| SNAIL       | 2863 | RSSLKVEVSELSIAAKISNLQPLGIEVEERLITEdSGG-ARPSKRSRVDVTP-VTKdMQWIELAKLYKSLGDFDVLHG     | 2940 |
| TRICHOPLAX  | 2860 | KELS-TQSSFASVASLASSQOPGILLLEKQIMHL--DTEEPPSKRIKTSASEATS-N--WIELSKLYKSLGIDYDVLHG    | 2933 |
| SEA ANEMONE | 2863 | SMLK-VQPSVSTASLASSQOPMGILLLEKQLLSQ-EAEPK-SHKRMRTEHSPSDT-TAAWLELAKLYKSLVEEFDVLHG    | 2938 |
| PRIAPULA    | 2900 | ISILRLDPAVTVTSQTSMQQNLGIVLLEKMLMQCaDDESRPAKMRAGSGMGVShTDTWIELARLYKSLGIDYDVLHG      | 2979 |
| ESHARK      | 2882 | KDLLGLDSTSVRSTSLASSQOPMGILLLEKSLIHS-TTNEEPPTKARGRQELPPDtdVARWIELATLYRSLGIDYDVLHG   | 2960 |
| STERLET     | 2892 | KELLNTEPSSVSSCLASSQOPMGILLMEESLIKG-LVPEEPPAKRARGRLELPPD--TARWIHLAKLYRSLGIDYDVLHG   | 2968 |
| COELACANTH  | 2883 | AELLMLDASVSTASLASSQOPMGILLLEKQLISQ-EAEPK-SHKRMRTEHSPSDT-TIRWLELAKLYRSLGIDYDVLHG    | 2959 |
| HUMAN       | 2866 | AALLSLDPAVTSAGCLASSQOPMGILLLEKQLLSQ-LPAELP-AKRVRGARLPPD--VLRWLELAKLYRSLGIDYDVLHG   | 2941 |
| CAECILIAN   | 2885 | TELLNLDPNSVSTASLASSQOPMGILLLEKSLIHS-LVPEEPPAKRARGRLELPPD--VVRWLELAKLYRSLGIDYDVLHG  | 2961 |
| PLATYBUS    | 2873 | TELLNLDPNSVSTASLASSQOPMGILLLEKQLISQ-EAEPK-SHKRMRTEHSPSDT-VVRWLELAKLYRSLGIDYDVLHG   | 2949 |
| CANARY      | 2874 | RELELDSANVSTASLASSQOPMGILLLEKQLISQ-EAEPK-SHKRMRTEHSPSDT-VIRWLELAKLYRSLGIDYDVLHG    | 2950 |
| OSTRICH     | 2844 | RELELDSANVSTASLASSQOPMGILLLEKQLISQ-EAEPK-SHKRMRTEHSPSDT-VIRWLELAKLYRSLGIDYDVLHG    | 2920 |
| TURTLE      | 2883 | RELELDSANVSTASLASSQOPMGILLLEKQLISQ-EAEPK-SHKRMRTEHSPSDT-VIRWLELAKLYRSLGIDYDVLHG    | 2959 |
| ALLIGATOR   | 2841 | KELLIDDSVSTASLASSQOPMGILLLEKQLISQ-EAEPK-SHKRMRTEHSPSDT-VIRWLELAKLYRSLGIDYDVLHG     | 2917 |
| SOFTCORAL   | 2880 | GKLS-LEAGKVTTASIGSLQOPTGIMLLEKQLISQ-EAEPK-SHKRMRTEHSPSDT-TATWIELSKLYKSLVEDFDVLHG   | 2957 |
| STONYCORAL  | 2908 | CKLRSVDSASVSTASLASSQOPMGILLLEKQLISQ-EAEPK-SHKRMRTEHSPSDT-TTCWIELSKLYKSLVEDFDVLHG   | 2985 |
| ACORN WORM  | 2901 | AELLMLDASVSTASLASSQOPMGILLLEKQLISQ-EAEPK-SHKRMRTEHSPSDT-ISTWIELSKLYKSLVEDFDVLHG    | 2978 |
| LANCELET    | 2909 | PRKLSVDSASVSTASLASSQOPMGILLLEKQLISQ-EAEPK-SHKRMRTEHSPSDT-ISTWIELSKLYKSLVEDFDVLHG   | 2986 |
| SEA URCHIN  | 2906 | SEQLTLDPAVTSAGCLASSQOPMGILLLEKQLISQ-EAEPK-SHKRMRTEHSPSDT-ISTWIELSKLYKSLVEDFDVLHG   | 2983 |
| STARFISH    | 2924 | SEQLTLDPAVTSAGCLASSQOPMGILLLEKQLISQ-EAEPK-SHKRMRTEHSPSDT-ISTWIELSKLYKSLVEDFDVLHG   | 3001 |
| TERMITE     | 2874 | IFHKYLNLC-GENVHKALKWETS GHWDKARMEYEAALSSMDQDGL-----SDYVEALYKCLAHLSDWKGLNNQVRRQ     | 2945 |
| SHRIMP      | 2918 | VVQKLGAIKEBTQKALEAEATNNHVKAFLLYRQSLDTDWEEEP---LAAENRLEWEYNSCAAILGQWSELENFVEKR      | 2994 |
| SCORPION    | 2934 | IFNSNLNI-QEETKQALEFESRGEYLLAVKIYKSLYDQTEWSAE-P-NQAEIDLWDNAILQCYDYLTQWDLQLSINR      | 3010 |
| ALVINELLA   | 2892 | IFGSKLGT-KEITLAEAEASGSDYQAVQLYKALVCTDWEDEP---DELEKDFWADSLHCYEHLTQWKLLECTLTN        | 2967 |
| CAPITELLA   | 2932 | IFSSQIGS-KPATRLAEAEARGDYRSALQYNEAMSQDDEhP-TEAEINMWDSSRIECAENLTQWRDVELTSTSD         | 3009 |
| SPONGE      | 2962 | IFNLDLDT-KDVTKALEAEERGDYLTALNLYKKAIDF-DWQGES-P-QVEEEDLWEDSLNAYSHLTQWKLKASTCN       | 3038 |
| OYSTER      | 2930 | IFSGRIGT-KDITKAEVQMEARGDYKAVKLYNQALSCNDWEN-P-PTIEVDMWDESRMECLDNLISQWKELEGVAMS      | 3005 |
| SNAIL       | 2941 | IFSGMLKT-KEVTQLALIEESHSEYKAAIALYNKALAESADHDP--P-LEAEIDLWDESRMECLNRLTEWTKLEMTTDA    | 3016 |
| TRICHOPLAX  | 2934 | IFSGHLGT-KDITQALAEASRHDYAAAVKYINQAMDCSSWDPGE-P-QAEEDLWESIRLECLYNLTQWDLKLEYLSLVN    | 3010 |
| SEA ANEMONE | 2939 | IFSDHIGT-KPITRLAEAEARGDYAAQALKYNEAMSQDDE-WSSK-P-QQEEEDLWDDARMQCFANLAKWGLDEYKSTG    | 3014 |
| PRIAPULA    | 2980 | IFNDKIGT-QTCTQALQAEASCDYKLARKLYQALAE-EGWESegP-QGGERDLWDISLMQCLDRDWTALDAHTKEC       | 3056 |
| ESHARK      | 2961 | IFSGRIGT-KDITKAEVQMEARGDYKAVKLYNQALSCNDWEN-P-METEKFDFWEIAALECYNHLETEWKALEYCVSTN    | 3037 |
| STERLET     | 2969 | IFSGKIGA-KSITSMALQAEAKSDYAEAVKLYNEALNTEEWTDPGE-P-AEAEKDLWEIAALESYHLETEWKSLEYCVSTN  | 3045 |
| COELACANTH  | 2960 | IFSGMIGT-KQVTKALLAEAKSDYSEAVRLYDEALNVEEWPDPGE-P-TEAEKDFWELAELECYSHLETEWKSLEYCVSTN  | 3036 |
| HUMAN       | 2942 | IFSDHIGT-KPITRLAEAEARGDYAAQALKYNEAMSQDDE-WSSK-P-QQEEEDLWDDARMQCFANLAKWGLDEYKSTG    | 3018 |
| CAECILIAN   | 2962 | IFSGKIGT-KPHTKALLAEAKSDYATAAKLYDEALNPDWSDNDE-P-TEAEKDFWELAELECYSHLETEWKSLEYCVSTN   | 3038 |
| PLATYBUS    | 2950 | IFSGRIGT-KDITKAEVQMEARGDYKAVKLYNQALSCNDWEN-P-PTIEVDMWDESRMECLDNLISQWKELEGVAMS      | 3026 |
| CANARY      | 2951 | IFSGKIGT-KEITQKALLAEARNDYAEAAQYDKALSQEDWQDGE-P-TEAEKDFWELAELECYDHLTMWKSLEYCATVN    | 3027 |
| OSTRICH     | 2921 | IFSGKIGT-KEITQKALLAEARNDYATAAKHYDEALSKEDEWQDGE-P-TEAEKDFWELAELECYDHLTMWKSLEYCATVN  | 2997 |
| TURTLE      | 2960 | IFSGRIGT-KDITKAEVQMEARGDYKAVKLYNQALSCNDWEN-P-PTIEVDMWDESRMECLDNLISQWKELEGVAMS      | 3036 |
| ALLIGATOR   | 2918 | IFSGRIGT-KEITQKALLAEAKSDYVEAVKYQDEALSQDWSDPGE-P-SEAEKDFWELAELECYDHLTMWKSLEYCATVN   | 2994 |
| SOFTCORAL   | 2958 | IFNSHIGT-QSITKDAEAEARGDYTEALKLYNQALSCNDWEN-P-PTIEVDMWDESRMECLDNLISQWKELEGVAMS      | 3035 |
| STONYCORAL  | 2986 | IFTHGIGT-KDITREAMEAEARGDYQAALKLYNEAIGTDDVVIKE-ELRQEEEDLWDSVRLQCLADLTQWKELEKCSVES   | 3063 |
| ACORN WORM  | 2979 | IFSGKIGT-QVYTRAEAEASANYQKAAANLYDEALNVEEWPDPGE-P-EQVEEDLWDDCLRCYQELTDQWKLQASTIN     | 3055 |
| LANCELET    | 2987 | IFSRKIGT-QVYTRAEAEARGDYKAVKLYNQALSCNDWEN-P-PTIEVDMWDESRMECLDNLISQWKELEGVAMS        | 3063 |
| SEA URCHIN  | 2984 | IFGALIKT-KDVTQEAQAEARGDYSALELYSKAISSDWGPDP--V-AREEEDFWEARLQCCNQLTKWDMESFSTDO       | 3059 |
| STARFISH    | 3002 | VFSACIGT-HEITKTALEAEARGDYSTALKLYNQAFEM-DWDEGA-V-SQVEEDLWDESRNLCCNQLTKWKLQNYSTVN    | 3077 |
| TERMITE     | 2946 | V--ENN----LDQLWTDEWLQEKLLPQILLSEIQMMLDKGVDskREQFLQVDRWRDRDKSDYLSH-YCEELAAIFL       | 3017 |
| SHRIMP      | 2995 | FlgDDD-GEVDLNRVWLLPKPTATALPALVHVSKLMLNILD-GSET-DGNLIAFIDQSMGDHRRMSLEGD-LPLQLGLVLA  | 3070 |
| SCORPION    | 3011 | L--DENqKQPNLNKIWEPPYQENYLPFLIKSKLKLIE-NRN--DQSLLCFIDSALKEENKKKYLEEN-FSEELALLYI     | 3084 |
| ALVINELLA   | 2968 | L--DDV-RSANDLRIWEDTYQDTPYLYIHSKLLKLLnGEG--QDDLATFIDNAMKVTERRALLESQ-YVSELALLYI      | 3041 |
| CAPITELLA   | 3010 | L--EGS----SLAVWDSYHQEVYLPMLRSKLLILN-GDTs-QDNLLSFIIESLTPVHKAFTEGS-FSSELALVCI        | 3080 |
| SPONGE      | 3039 | IgeETN---SKLEQLWKDSYQEHYLPFVLSKLLKWC-TDSS--DHGLASFLDKSLSEANRSVLESH-YPQELTLYS       | 3111 |
| OYSTER      | 3006 | I--SSN---SISQVWKDTYQEHYLPYIIRSKVKLLMLQ-GDGD-QQPLLTFFIDCMQTEQKALIESR-YSEELALLYI     | 3076 |
| SNAIL       | 3017 | L--SQE-GEISLASVWDDTYMYETYPYLIIRSKLKLILLH-GDEK-QQSLLSFIDSMKNPQRAHLESR-YCEDLALMYV    | 3090 |
| TRICHOPLAX  | 3011 | V--DNN-DPPSFDKIWDNYQENYLPFLFKSKAKVMCE-NLagSDDFIQVNLKSLANDEHLSVLENRhdC-CLALIHV      | 3085 |
| SEA ANEMONE | 3015 | V--DDEgNPPDLKTIWDTYQEHYLPFIMRSSIKLICE-GE--eRPCFLEFLRSMNNEKAFLESR-YGDDLALLFI        | 3088 |
| PRIAPULA    | 3057 | LipEGS-SEADQLLWEDTYEENHLPFVPMARLKRLLV-EGAr-DQTLFSVDAATGHDPDRAVIETW-HGEELALLYI      | 3132 |
| ESHARK      | 3038 | I--DDK-TPADENIWNDFYQETYPYLYMIRSKVLLQL-GEV--DQSLLTfVDRAKMKVQRKALIESR-YSEELALLYI     | 3110 |
| STERLET     | 3046 | I--DDS-SPADLEKIWDPPYQAYLYPYMRSVSKLLQL-GEV--DQSLLTfVDNAMKVEERKSIETS-YSQELSLLYI      | 3118 |
| COELACANTH  | 3037 | I--DDK-TPADENIWNDFYQETYPYLYMIRSKVLLQL-GEV--DQSLLTfVDNAMKVEERKSIETS-YSQELSLLYI      | 3109 |
| HUMAN       | 3019 | I--DSE-NPPDLNKIWSPPYQETYPYLYMIRSKVLLQL-GEV--DQSLLTfVDNAMKVEERKSIETS-YSQELSLLYI     | 3091 |
| CAECILIAN   | 3039 | I--DSE-NPPDLNKIWSPPYQETYPYLYMIRSKVLLQL-GEV--DQSLLTfVDNAMKVEERKSIETS-YSQELSLLYI     | 3111 |
| PLATYBUS    | 3027 | I--DSE-NPPDLNKIWSPPYQETYPYLYMIRSKVLLQL-GEV--DQSLLTfVDNAMKVEERKSIETS-YSQELSLLYI     | 3099 |
| CANARY      | 3028 | I--DSG-KPPDLKTIWDPFYQETYPYLYMIRSKVLLQL-GEV--DQSLLTfVDNAMKVEERKSIETS-YSQELSLLYI     | 3100 |
| OSTRICH     | 2998 | I--DSG-QPPDLNKIWSPPYQETYPYLYMIRSKVLLQL-GEV--DQSLLTfVDNAMKVEERKSIETS-YSQELSLLYI     | 3070 |
| TURTLE      | 3037 | I--DSE-NPPDLNKIWSPPYQETYPYLYMIRSKVLLQL-GEV--DQSLLTfVDNAMKVEERKSIETS-YSQELSLLYI     | 3109 |
| ALLIGATOR   | 2995 | I--DSE-NPPDLNKIWSPPYQETYPYLYMIRSKVLLQL-GEV--DQSLLTfVDNAMKVEERKSIETS-YSQELSLLYI     | 3067 |
| SOFTCORAL   | 3036 | F--DEANGLNQLWDDYQEHYLPFLLSKLLKFLI-GD--rDEVFNFIKDSLKNKRVYLENK-YSDILALLFI            | 3109 |
| STONYCORAL  | 3064 | I--DDK-NPPDLKTIWDPFYQEHYLPFLLSKLLKFLI-GD--gDMTINEFVAKAMKTSERAAALRSR-YSDSLALMYV     | 3136 |
| ACORN WORM  | 3056 | I--DDN-DPPDLKTIWDDYQEHYLPYVYKSKLKLME-DDDtdDQSLLTfIDKSMQHKERKALIENR-YSEALAMLYL      | 3130 |
| LANCELET    | 3064 | I--DED-SPPDLKTIWDDYQEHYLPYVYKSKLKLME-DDDtdDQSLLTfIDKSMQHKERKALIENR-YSEALAMLYL      | 3136 |
| SEA URCHIN  | 3060 | I--EGK-GSNDLSQIWNDDYQEIYLYPYMRSKLRKLE-GEV--DQSLLTfIDKSMQHKERKALIENR-YSEALAMLYL     | 3132 |
| STARFISH    | 3078 | I--DDN-SPHDLKTIWDDYQEHYLPYVYKSKLKLME-DDDtdDQSLLTfIDKSMQHKERKALIENR-YSEALAMLYL      | 3150 |

Supplementary Figure 3: DNA-PKcs COBALT Metazoa Vertebrate Invertebrate

|             |      |                                                                                    |                            |                          |      |
|-------------|------|------------------------------------------------------------------------------------|----------------------------|--------------------------|------|
| TERMITE     | 3018 | IQDKLDQAQHQVEHSLTMFLDWSAALN--PSSHNLRTRKQLLDLQKTAELKACLAFAATNGEHSKQ---ELLAKELVKRWNK | 3092                       |                          |      |
| SHRIMP      | 3071 | HQEKFEQANVYANTATSMFLTLTSLQYS--VLTNPPLDQLQNVQLLTELSDCLNNVYADRDFY---SSKVKQTVTSWKK    | 3145                       |                          |      |
| SCORPION    | 3085 | IQENYDRAQYYSQCLQDFLKEWSSLN--VLMPDIRKTKLQSLQKHIELEQELNFDITRYRIDE---YHFKNLTRDWLK     | 3158                       |                          |      |
| ALVINELLA   | 3042 | WQEEYDRAMSHVDQAIQLFLQNWAGLD--ALMSNRLHLRLTQKLTMEHEFLQFMKNKHSISF--MQSVIQANAWMR       | 3116                       |                          |      |
| CAPITELLA   | 3081 | HQELYDKAKHYANMSLQAFIQDWNALS--TRTSTRATKQLKLEFFTEMQEFLSVIKTTSGEDFPr---QIDRTLHKWEA    | 3155                       |                          |      |
| SPONGE      | 3112 | LRDDYDRARYYSLSLKAKQQIWSVQDgiSSSTGAVSSVQSLQRLTEMNEFITFMKSNDFSSPg---PVNNLLRKRK       | 3188                       |                          |      |
| OYSTER      | 3077 | WQADYDRARYHSTLATQFFLLDWSST--SLSVSRKSLQRLQPLVELQEFLSFMASEGNFTS---VTPANSLIERWQA      | 3151                       |                          |      |
| SNAIL       | 3091 | WQKNFDLARHYARLAVQSPFDQWSSD--SLMTASRTHCLQRLQLLELQEFLLDFVADKNFTS---FEPHQIARWQ        | 3165                       |                          |      |
| TRICHOPLAX  | 3086 | LLEKYDRARYYLDPSIQFLQDWSALD--SLLYSRASKLQSLQTLTEMQEFLLQFMDGGRNFES---VTPVLSLISKWST    | 3160                       |                          |      |
| SEA ANEMONE | 3089 | LRDDYGRARYHVNTCFQAFKLDWSSGLS--SMVSSRSASKLQSIQKITEMQEFLEFVVKEGKLLK--KT--LEDLFSRWSV  | 3162                       |                          |      |
| PRIAPULA    | 3133 | VQGDYTRARHHAARCLQAFRLDWSALD--ALMLASRARLRSLOKLTTEMNEFLDAITATPDAFT--rNDTARALVDRWMD   | 3208                       |                          |      |
| ESHARK      | 3111 | LQDDVDRAKYIINNCFEVMQNYSSID--TLLHQSRLLTKLQSLQAVTEMQDFLHFISKEYNFIS---EVPRLKLLRRTWTF  | 3185                       |                          |      |
| STERLET     | 3119 | LQGDVDRAKYIYVNNCQVFMQNYSSID--TLLPGSRLLTKLQSVQALTEIQDFLNFMTKDV---S---QTSLKSLIRIWTDF | 3190                       |                          |      |
| COELACANTH  | 3110 | LQDDVDRAKYIYVNNCQVFMQNYSSID--TLLHQSRLLTKLQSVQALTEIQDFLGFISKPDHLNS---RASLRLRLNWS    | 3184                       |                          |      |
| HUMAN       | 3092 | LQDDVDRAKYIQNGIQSFMQNYSSID--VLLHQSRLLTKLQSVQALTEIQEFLSFIISKQGNLSS---QVPLKRLNLTWTF  | 3166                       |                          |      |
| CAECILIAN   | 3112 | LQDDVDRAKYIYDNGIQVFMQSHSSID--TLLNKSRLTKLQSVQALTEIKDFIHFISKPSNLTS---QTSLKRLRIWSS    | 3186                       |                          |      |
| PLATYPUS    | 3100 | LQDDVDRAKYIIDYCIQFMQNSID--ALLQSRLLTKLQSVQALTEIQDFNFISRPSNLSS---QASLKRLLRIWTF       | 3174                       |                          |      |
| CANARY      | 3101 | LQDDVDRAKYIYISNGIQFMQSYSSID--SLLYQSRITKLQSVQALTEIQDFNFMTKRSNLAS---EASLKRLLRTWTF    | 3175                       |                          |      |
| OSTRICH     | 3071 | LQDDVDRARYYISNGIQFMQSYSSID--TLLMGTIRSSKLQSVQALTEIQDFIHFMTKTSNLAS---QASLKRLLRIWTF   | 3145                       |                          |      |
| TURTLE      | 3110 | LQDDVDRARYYISNGIQFMQNYSSID--TLLHQSRLLTKLQSVQALTEIQEFLNFISKPSNLAS---QVSLKRLRIWTF    | 3184                       |                          |      |
| ALLIGATOR   | 3068 | LQDDVDRARYYISNGIQFMQNYSSID--ALLHQSRLLTKLQSVQALTEIQDFINFMRPSNLAS---QASLKRLLRIWTF    | 3142                       |                          |      |
| SOFTCORAL   | 3110 | LQDDYDRARYYISLCLQAFLEDWSSGLD--SISMTSSRAHLSLQALTEMQEFLLDFISHEDNFST---ISSVKSLKRWSS   | 3184                       |                          |      |
| STONYCORAL  | 3137 | LQDNCDSASYAALSQSPFLSDWAGLD--SNLRSRSIKLQSLQKITEMQEFLEFAEENFSS---PMPVLSLKNWYS        | 3211                       |                          |      |
| ACORN WORM  | 3131 | LQDDVDRARYYISNGIQSFLQDWSGTD--TLLMGTIRSSKLQSVQALTEMQEFLLFTITNERNFDE---HKPVSDLISKWTF | 3205                       |                          |      |
| LANCELET    | 3137 | YQDDYGRARYYVGNCTDAFLQDWSGMD--RLMTSSRAAKLQSLQKLTTEMQEFLELISNDRNFET---PWPVTRLEKWS    | 3211                       |                          |      |
| SEA URCHIN  | 3133 | LKEDYDRAMPYLANCTSSFLQDWSGLG--PLMITSRRALKQCIQRLTEKQNFLLKAIKPDLQEA1gcQKSLLE--LLDRWSG | 3207                       |                          |      |
| STARFISH    | 3151 | IQEDYDRAMPYLANCTSSFLQDWSGLG--PLMITSRRALKQCIQRLTEKQNFLLKAIKPDLQEA1gcQKSLLE--LLDRWSG | 3227                       |                          |      |
|             |      |                                                                                    |                            |                          |      |
| TERMITE     | 3093 | NVPSA--FDSLLRWDIRAMYRKKF--TNRIDQMLEN                                               | -----TGASNALSRTE           | -----LAMVD               | 3140 |
| SHRIMP      | 3146 | QKCRIDDDNPL--MTQCLASYRDLY--LHLMKELKPE                                              | -----DSDL                  | --VSNLIKDKTNFTHRFVIR     | 3199 |
| SCORPION    | 3159 | RYPDI--FDSVINWDDIIMNRSLY--MEKIVSKLQK [ 3 ]                                         | QSTFSFLEESMDTSIVDSEP [ 3 ] | FDSEKFLKEQRLKMKLKFVE     | 3236 |
| ALVINELLA   | 3117 | RSPDPVDPDTIWDVMSYRILY--LDQMAQHLKN                                                  | -----                      | [ 5 ]EGMDIFNEHKVNFRLKQAE | 3174 |
| CAPITELLA   | 3156 | RSPDLRLDSVIVDNIILNRRVY--MDHFAEHLTS                                                 | -----IDAKIM                | -----PFGKQVVMSSLAQVD     | 3209 |
| SPONGE      | 3189 | RFPDPKLDVPIWDDIITTRWMM--LRKISTKLQD [ 4 ]                                           | QCEYLLDDDGSSCSVDSDM        | -----KNENINMFMRAAD       | 3258 |
| OYSTER      | 3152 | RALHPLDTEAVDNNVTRNMVF--LDHISNRLST                                                  | -----SLVKKEEDAMEEDEE       | ---D--LFLASKIHLRLKMD     | 3215 |
| SNAIL       | 3166 | RYPHVQLDLVDIWDVVTNRNVY--MDKIRDQMLS                                                 | -----S-----NLMEEDHD        | -----SSIFEDIKRLQQLKLAH   | 3224 |
| TRICHOPLAX  | 3161 | RFPNVEIDPINWDDIIVNRCMY--LRKILLQYRV [ 5 ]                                           | TSTEDSMEIDGEDRVYITF--      | PALKKRIAEVEVSLYKLLAD     | 3237 |
| SEA ANEMONE | 3163 | RFPNSKLPISVWDDVITNRRIFgLTVCVYRP--                                                  | ---DSMDVDGEWSCPSV--        | DALRERITREVALQLKMWQ      | 3228 |
| PRIAPULA    | 3209 | HMPHTLDPVISWDDVTINRCLY--MDLHSRHF--                                                 | -----HGNQFAGSDP            | -----FLEQKFNFLFAYQ       | 3263 |
| ESHARK      | 3186 | RYPDAKMPMSIWDVITNRCFF--LDKIQERLVS                                                  | VQADESMEVDREGEVETRM [ 5 ]  | EDINMAIRSCFNMKLMKMAE     | 3263 |
| STERLET     | 3191 | RYPDAKMPMNWDDIITNRCFF--LDKIAGKLTN                                                  | SEADNSMEVDGGEDTGVKME [ 4 ] | EDVGSIMIRGCKFSMKLMMAD    | 3267 |
| COELACANTH  | 3185 | RYPDAKMPMNWDDIITNRCFF--LDKIQEHLCK                                                  | VPADESMEVDGEGDASPRMD [ 4 ] | PNISAMVQSCFNMKLMKMAE     | 3261 |
| HUMAN       | 3167 | RYPDAKMPMNWDDIITNRCFF--LSKIEEKLTP                                                  | LPEDNSMNVDDQGDPSDRME [ 5 ] | EDISSLIRSCFNMKMKMID      | 3244 |
| CAECILIAN   | 3187 | RYPDAKMPMNWDDIITNRCFF--LDKIREKLPH                                                  | QPADSMEVDGGGDASDRME [ 5 ]  | EDITSMIRSCFNMKLMKME      | 3264 |
| PLATYPUS    | 3175 | RYPDAKMPMNWDDIITNRCFF--LSKIQEKLQ                                                   | LQADDSMEVDGGGDTDRME [ 5 ]  | DDIYSMIESCKFSMKMKMIE     | 3252 |
| CANARY      | 3176 | RYPDAKMPMNWDDIITNRCFF--LDKIQEKLPS                                                  | QDANDSMEVDGEYSAGDQME [ 5 ] | ENIHSMIRSCFNMKMKMIE      | 3253 |
| OSTRICH     | 3146 | RYPDAKMPMNWDDIITNRCFF--LDKIQEKLPR                                                  | DQANDSMEVDKEDIDGDQME [ 5 ] | EDISSMIRSCFNMKMKMIE      | 3223 |
| TURTLE      | 3185 | RYPDAKMPMNWDDIITNRCFF--LGKIQEKLPN                                                  | IQADDSMEVDGRGDVGDQME [ 5 ] | EDIHSMIRSCFNMKMKMIE      | 3262 |
| ALLIGATOR   | 3143 | RYPDAKMPMNWDDIITNRCFF--LDKIQEKLNL                                                  | VQADDSMEVVEAGDIGDEME [ 5 ] | DNHSMIRSCFNMKMKMIE       | 3220 |
| SOFTCORAL   | 3185 | REPDPKLSHVGWEDVMTNRSVF--LDKILLKFGQ [ 4 ]                                           | HSSDSMEID--GLNT--          | TQLEEIFLRERVLFSLRLSE     | 3255 |
| STONYCORAL  | 3212 | RIPPHILHPIGWDDIIVTRNVLF--MSKFLQKF--                                                | ---EAMGAE--ERSGICL--       | DDIKDKFPKQVEVLKLCMAN     | 3275 |
| ACORN WORM  | 3206 | RIPDPKNDPNTWDDIIVTRNVYF--LRKLFQKSGD                                                | -----AMEGGDQAMVNAI--       | -----SKDKLMLKLVLD        | 3265 |
| LANCELET    | 3212 | RYPDKNDPISVWDDIIVANRCLY--L-----D                                                   | -----KLNDFEQMAARGVL [ 6 ]  | EPFSHRAQREQFLRLVLVLD     | 3277 |
| SEA URCHIN  | 3208 | NLPDKNDPISVWDDVTVQYRCLY--MDKLCNLLGD                                                | -----SGGGGGGDSMETED        | QKFDLVRREKVLKLSMKMAD     | 3275 |
| STARFISH    | 3228 | CHLDSKDPINWDDVVSNNRLY--MDKLGSRFIR                                                  | -----SES-----QAGGEE        | TALEKRILRERLWLEKMD       | 3290 |
|             |      |                                                                                    |                            |                          |      |
| TERMITE     | 3141 | SALYQENFYIARKYLREaREKMSNSGTDE--LQCSLAYSKAKWLQALKNTT--dEKLKLGLDSWSVIEDQr--FEQY      |                            |                          | 3213 |
| SHRIMP      | 3200 | AALHNSYHLANRHLK--ISLSEDEYS--KAQFYFLMAETHLIRGQKQTD---RLKYLVEAWAKYLGRV--SSMSI        |                            |                          | 3269 |
| SCORPION    | 3237 | AALLOGNLQVAVKHLK--SQQIAKELKADH--HWINCILHYCKIDLKAKKNQYNP---EQLDTLLCAHKQLAKL--DLHF   |                            |                          | 3308 |
| ALVINELLA   | 3175 | AANQONNFVVALKQMKa--TFNLVKGVNKT--LHIECYHEWTRIQHKKCKVASLT--tNEKIKALIE TMNVLEQRa----- |                            |                          | 3245 |
| CAPITELLA   | 3210 | AASLQGNHSVARKLLKS--AKDLVKVVDSE--LSVFLTHSHANANKRCKASGSEP--sERLNLLEVEVKRLLDKC--SESST |                            |                          | 3283 |
| SPONGE      | 3219 | AARTQSNYPVAENYLYKIVeKSIKLDPPDNYfIQRLWHLSLIKVRLDRIHQDPSPTdmeEAVISLTCQMDNFKGRlgSGSGK |                            |                          | 3338 |
| OYSTER      | 3256 | SSCHKRNHLKALNLLAD--IHKNYRDKENEI--LNLWSHLYAKTHQLSAMSADTDwtndIFSSVITIDRLGKF--KDSLL   |                            |                          | 3291 |
| SNAIL       | 3225 | SCQEONNFNLTRILKE--TYSKCKREKSEL--LVVEWSHLYATHQKALSCSGIwskDMLYNVLSLTDPLSKV--AESKM    |                            |                          | 3300 |
| TRICHOPLAX  | 3238 | TARLQSNYPVAIKHLRQtLYHINQELDKDELTVKWTHTIYTKVHCDKSLTPPD---ERLKTLLTANSQFEKV--KDSL     |                            |                          | 3312 |
| SEA ANEMONE | 3229 | AAREQSNFPVAHRYLREsLKSI--EDN--LHVKWTHAYAVTQKKAHGLMAT---DAVQTALSTVSKLQK--SINTL       |                            |                          | 3297 |
| PRIAPULA    | 3264 | SAMQQRNFPVALKHLRT--TNQLLKKLSDS--LAVQWTHSYVRTWQIATGHQRD--sadRLHRLDITIKELDKH--AGKAV  |                            |                          | 3338 |
| ESHARK      | 3264 | SGTKQRNFPVAMKLLKE--LHESKARDWA--VKWTHYSRSLSHRSRQARP---EQVTVLKSIPLLVEI--NVDY         |                            |                          | 3333 |
| STERLET     | 3268 | SARKQNNFVSATKLLKE--LHRESKNEEDWL---VRVHVSFRFSHTRSHTQSSS---EQLITVLTIPPLEER--KIDY     |                            |                          | 3337 |
| COELACANTH  | 3262 | SARKQNNFVSATKLLKE--LHRESKREBCL---TRVHVSFRFHSRSQSQSCP---ERIQVMKTIISLLES---KADY      |                            |                          | 3331 |
| HUMAN       | 3245 | SARKQNNFSLAMKLLKE--LHESKTRDDWL---VSVQSYCRLSHCRSRQGCCS---EQVLTVLTIVSLLEDN--NVSSY    |                            |                          | 3315 |
| CAECILIAN   | 3265 | SARKQNNFVSAMKLLK--LHRESKTRDDWS---VRVHVSCHYTHSRQSQTSP---DQVLSVITVSLLEET---KADY      |                            |                          | 3334 |
| PLATYPUS    | 3253 | SARSQNNFVAMKLLK--LHRESKTRDDWL---VRVHVSCHYTHSRQSQSSP---EKLLTVLTVSLLEDN--LSSY        |                            |                          | 3322 |
| CANARY      | 3254 | SARKQNSFAVAKLLK--LRKEARWEDWL---VRVNYACRFTTHSSRNLSCP---ERVLSVLTISLLEDT---KSDY       |                            |                          | 3323 |
| OSTRICH     | 3224 | SARKQNSFVAKLLKY--LHREAKTRDWL---VRVNYACRFTTHSSRNQSCP---EQVCSVLKTIISLLEDT---KSDY     |                            |                          | 3293 |
| TURTLE      | 3263 | SARKQNSFVAMKLLK--LHRESKTRDWL---LRVHVSCHYTHSRQSQNSP---EQMLTVLTIISLLEDN--KSDY        |                            |                          | 3332 |
| ALLIGATOR   | 3221 | SARKQNSFAVAKLLK--LHRESKTRDWSL---VRVHVSCHYTHSRQSQSSP---QQLLTVLTVSLLEDN--VPDH        |                            |                          | 3290 |
| SOFTCORAL   | 3256 | VATGQVNFPAVAKQLQSLHLIRDRLLKNDSELeVWTHSYGDLNCKKCPNLLPS---EAVDTAISALDQDKI--KDSKV     |                            |                          | 3330 |
| STONYCORAL  | 3276 | AAKEQGNVAVAHRCLEaLYKIPQGNEN--LNISSHTYAEVHFRKIQTTLAV---GAVETALLVAGQLDKF--SASKI      |                            |                          | 3347 |
| ACORN WORM  | 3266 | SVSQONNFVGAEKYLK--NCADAR--DDDA--WRLIWTLSYARLHQKCL--TLP--psKRVINLLTLDQLGMF--TEGC    |                            |                          | 3335 |
| LANCELET    | 3278 | SAREQANFPVALKHLKN--TLKDFP--EDDP--LRLRWTHCYARLHQKAS--LLT--gadKLNVLTFEQLDKF--SSCRV   |                            |                          | 3348 |
| SEA URCHIN  | 3276 | SACQONFVAVAKHLK--THRGLVEFED---LRPAWTHSYVSMTRKAL--LLK--pyERITSLKALDHLGKL--PVSHN     |                            |                          | 3346 |
| STARFISH    | 3291 | SACQGNFVAVAKHLK--THGSLSAHED---LKPKWTHSYVQMNQKIL--TIE--lkeQVMTLLTFDPLAKL--SNTPA     |                            |                          | 3361 |

Supplementary Figure 3: DNA-PKcs COBALT Metazoa Vertebrate Invertebrate

|             |      |                                                                                     |                                              |      |
|-------------|------|-------------------------------------------------------------------------------------|----------------------------------------------|------|
| TERMITE     | 3214 | PMLHAETLQHVSVMAAG---ILQLEQQPVL[1]-KLPAAEVKKLADR--IGAPdc---SQD                       | TLMQNLKQYGLSS                                | 3278 |
| SHRIMP      | 3270 | LDQNRPRVEIQYKLESHLCLCRAIQDMGDDW[3]NQYMQVLSKPFENA--NGKESw---QRE                      | -----LSSCYKS                                 | 3336 |
| SCORPION    | 3309 | PKKLDVSTMMHYLLQSEIEMAADIVKYNDVHA                                                    | -----EKIQEL--TDTFS--iQSKS                    | 3370 |
| ALVINELLA   | 3246 | -VDDSRVKCSQHILQQALFQLISLLKDDIHLV                                                    | -----DEYRNEIQNIthCGTYDh-----E                | 3309 |
| CAPITELLA   | 3284 | LKLNAAALCDQHLLQGEHLVMTATLQNQVKDI                                                    | DALDQKLEKITES--VGSALP---SHQ                  | 3352 |
| SPONGE      | 3339 | AISSKPFISQHHVLLGKLLNMAEIFATPEDGM[3]SALSNDGNTKLNLSL-iGTPS---TSTK                     | AISEGLWIQALSS                                | 3411 |
| OYSTER      | 3292 | FEREAGLGRHFVLLGQAFGLLVKGVQS-ENCF                                                    | SSLSDDKNSKIMGI--SKASK--LNPR                  | 3359 |
| SNAIL       | 3301 | LREKPALGMRHMLLERSRTFDAVVTGLMS-VGNL                                                  | EELGDKTCEKLOQY--TK-SP---LNKG                 | 3367 |
| TRICHOPLAX  | 3313 | ILENTTLRREHLLRSRLDMTSKILAESDASI                                                     | LDDLLEKKESLYQL-aNVNQH---DSKE                 | 3382 |
| SEA ANEMONE | 3298 | AN-DPVIALRHHLILRSRCPDILTDAIAGAG---                                                  | -----RSTLATYKLIcLINQP---VDKS[8]QIVSQLITRSFTS | 3367 |
| PRIAPULA    | 3339 | LHQQRGLARENLLKGRSIEAVAREVLTRPASL                                                    | HTLPAATREKLSLV--AGARE---HDHT                 | 3407 |
| ESHARK      | 3334 | LNTHTRILRDQNTLLGSSYCILADALNKPECTCL                                                  | QRIKEQDAERVIEH--SGSSS---BEIQ                 | 3402 |
| STERLET     | 3338 | TKATRTRIVRDQNTLLGTYHYIMANALTRDGLAL                                                  | EHIGEDKAGKVLDDL--LGTTS---DNLE                | 3406 |
| COELACANTH  | 3332 | LKNKTRAFRNQNTLLGTYTYRIANALNKPTFSL                                                   | QDIEEKARKIQDL--SGAQS---DHPE                  | 3400 |
| HUMAN       | 3316 | LSKNILAFRDQNTLLGTYTYRIANALSSEPAEL                                                   | AEIEEDKARRILEL--SGSSS---EDSE                 | 3384 |
| CAECILIAN   | 3335 | LRNTREFARNQNTLLGTYTYRIANALCKDPRCL                                                   | QRIDKNKADKVLQL--SGTMS---ENPD                 | 3403 |
| PLATYPUS    | 3323 | LSKNIVFRNQNLLGTYTYRIANALSKEPASL                                                     | EQIERNKARKVMEL--SGASF---DNVQ                 | 3391 |
| CANARY      | 3324 | LSKNITMAFRNQNLLGTYTYRIANALSQDPRCL                                                   | EQIEEKARKKISLI--SGESL---ENPK                 | 3392 |
| OSTRICH     | 3294 | LSKNTAFRNQNLLGTYTYRIADALSHDPRCL                                                     | EQIEEKARKKVSVL--SGESL---ESPE                 | 3362 |
| TURTLE      | 3333 | LSKNIVAFRNQNLLGTYTYRIASALSQDPRCL                                                    | EQIEEKARKKVSML--SGERP---ENSE                 | 3401 |
| ALLIGATOR   | 3291 | LSKNIEILRNQNLLGTYTYRIAMVALSKDPRCL                                                   | VELEEDKVRKVSML--SGEKP---DSPE                 | 3359 |
| SOFTCORAL   | 3331 | LQENASTGIRHHLKSRNLDAITNVLSIPGTW-                                                    | DSLEKEAKEKLHGL-cSSKNP---EQLD                 | 3399 |
| STONYCORAL  | 3348 | LEIEPLRGIQHHLILRSKTFDILCKAMLDGGVVI                                                  | ATLESQAKNALVKL-crIDET---ESQK                 | 3417 |
| ACORN WORM  | 3336 | ---EPSYRKKQHEIILSGRSCHLVAQTIQAGDDI[4]HLKCRKSLRSLIEA--LI-----                        | ---VNLGNQKAHY                                | 3396 |
| LANCELET    | 3349 | FEEEDLAVAKQHHTLTSLSYEIVAHALIQEGGAI[2]GLKDRHAQLLTA--GVSPP---TSVD                     | QTISSLLQKGHC                                 | 3419 |
| SEA URCHIN  | 3347 | LGSDFLCLDRHILTSKTYQSMASALQEGGEM[2]RLSDAG--KLDKL--LSKAECqesKPE                       | KVCQSLFMKSKY                                 | 3417 |
| STARFISH    | 3362 | LQGDYLLTRHHILTSKSYDLVAIAIQKGGADI[2]GLRNVGKLDKLLGL--VGQ---naTRPE                     | QICSTLYSKAYSE                                | 3432 |
| TERMITE     | 3279 | LKTAEEVTPRGNs-----eQAVAKAHLQVAKYCRASNTSREDNFGTDI                                    | -----VTSILRAMRYG                             | 3334 |
| SHRIMP      | 3337 | LQLAVNCAEGLVKSDALNQDD--skSDSDAHLALVKYCEECVIKWKDHDVDSQY                              | -----SKSLMVSILRAMANG                         | 3405 |
| SCORPION    | 3371 | KCRAIDI IQEVEQKMI EFDQAT-----IGETYPKFANYCNKILRMQEEEEKTSL                            | 3]--SFETYPVSLTNSLLNALKNG                     | 3440 |
| ALVINELLA   | 3310 | M-KAAVVFASDSSCSPTDKINM-----AHMALSYCYDTYLRQSENDESGQKI                                | 3]--LSSFPAAVTVSLLAAMKNN                      | 3377 |
| CAPITELLA   | 3353 | FKSGVGVAAASQPES-----V-----CVNKAYMSLVHFCQDQLRQRENDEISGTK[1]E                         | 1]EEDDFPLALVTSLLSAMKNS                       | 3418 |
| SPONGE      | 3412 | F-NAGVRSGLTFLNPLKDPVPT-----VQSLERLFGFCNDALRQEDHDEQSTG[1]                            | 1]-DTKSFPSPSIIINHLLTAMSGL                    | 3480 |
| OYSTER      | 3360 | MRKLSY--D-GRGTRTCRY----GLEEAAYLALAQYCNKFLRMAEDDTRKESL[4]                            | 4]ECQKNFPEITITVCLLNAMKLD                     | 3430 |
| SNAIL       | 3368 | LRKVISEVPED-SSRDVCLQ-----QDVLALAKYCDKYLRLAEBNDGL---[3]                              | 3]ESMEVFPATAVKCLLDAMRAG                      | 3435 |
| TRICHOPLAX  | 3383 | LHQAVKASK-----EE-RGG-----SSYIEAMMMVNFCDLILREHEEDGRAN---[5]                          | 5]IDTKIFPEVIRYTLIEAMAYN                      | 3449 |
| SEA ANEMONE | 3368 | LQEAANKAAK-QAATSSSD-GST--TCMVEAMMAMVFCDRALRKEDESDGSPF[10]                           | 10]FVQFPPEFVRYVLKAMEHG                       | 3448 |
| PRIAPULA    | 3408 | LREAVDVGDEEESASLASSP-----SAAHVAMASYCDYFLVRREDDGTT---[1]                             | 1]LPTDGYAETVITSLLRAMALG                      | 3474 |
| ESHARK      | 3403 | LREAVRKAEEEVQSHSAGEHVDI---AGVIEAYMLANFCDRCLRKEEESATAINF                             | SEQOTFPACVVEKILKAMKYN                        | 3475 |
| STERLET     | 3407 | LQNAVKKAEEELQSRSTEHDID---PGAIEAYMTLVNFCDKRLREEEESAEVSTF                             | SELPTFPVAVVDTMLKALKLN                        | 3479 |
| COELACANTH  | 3401 | LQTAAKKAAEQVQSRSTEHDIV---AGVIEAYMTLVNFCDKRLREVEESAEVSHF                             | SELQTFPAVVVENLLRALKLN                        | 3473 |
| HUMAN       | 3385 | LSEAVRKAEEEAQPPWSWCGPA---AGVIDAYMLVDFCDQLRKEEENASVIDS                               | AELQAYPALVVEKMLKALKLN                        | 3457 |
| CAECILIAN   | 3404 | LDSAVKKAEEEVQSRAMENVDT---TGVIKAYMTLVNFCDTLLKKEDTAVVIDH                              | SHLQFPPTIVVEKMIKALKLN                        | 3476 |
| PLATYPUS    | 3392 | LTHAVRKAEEEEEQSHSSEHVDI---GGVIDAYMLVDFCDKHLRNEEETSVIDA                              | VVLQAYPALVVEKMMKALKLN                        | 3464 |
| CANARY      | 3393 | FSCAVRKTTEEVEQSSVDHVDI---VGVVDAYMLVDFCDQLRREEEGLEINT                                | VDLQFPFAIVVEKMIKALKLN                        | 3465 |
| OSTRICH     | 3363 | FSSAVRKEEEVQSHSMEHVDI---AGVIDSYMTLVDFCDQLRREEEGLEINT                                | ADLQFPFAIVVEKMIKALKLN                        | 3435 |
| TURTLE      | 3402 | FSTAVRKAEEEVQSHSMEHVDI---TGVIDAYMLVDFCDKHLRKEEESDVSVA                               | LDLQTFPFAIVVEKMIKALKLN                       | 3474 |
| ALLIGATOR   | 3360 | LQNAVRKAEEESQSRMEHVN---TGVIDAYMLVDFCDKHLRKEEESGLSDISA                               | VDLQTFPTIVVEKMIKALKLN                        | 3432 |
| SOFTCORAL   | 3400 | FORAIKIAQTENNQKNA-ESV---RNLVTSMTLVNFCDRLLRMEEDSEQ---[3]                             | 3]LDMKLFPGIVIRFVLKSMAPF                      | 3471 |
| STONYCORAL  | 3418 | LQSAIKAAK-NAEGKNC-TQT---SGTVDAMIAMVNFCDNLRKKEVS-----[5]                             | 5]VDTKLFPFVIRYMLKSMCYS                       | 3487 |
| ACORN WORM  | 3397 | FKKGVKLASDEEDA---IDM---drEGVIDAYVSMATFCDKMLKQEQNEDGAVS[2]                           | 2]SKSPSPFRSrvPHLLKALKLN                      | 3468 |
| LANCELET    | 3420 | LQKAVQAAEEDKARQDTSL---dksGIVDAPAMVFCCKILRHQEDDEEG--T[2]                             | 2]SSIPGLAAAVVSNLLQALRHD                      | 3492 |
| SEA URCHIN  | 3418 | LDDAVGTIKLDPASHLSSSAKreeQSMAKAHMALVDFCDQLRQDDDDCN-PD[2]                             | 2]PLMEAYPSTVNVSTLQAMNLN                      | 3494 |
| STARFISH    | 3433 | LKQAVSLADKDDAVTSQS-----eRSMTEAYMALVFCDRMLRLKESDEVPTMT[2]                            | 2]PQTDNFSPQTVVHYTLKAMHYS                     | 3503 |
| TERMITE     | 3335 | SKDARQLFPCLLQPLDTS-LSSELFHKESSAVPVWMLFGWVNLACLGTVPVGLHDIILRLAETYPQSLIYAFQLSR        | 3413                                         |      |
| SHRIMP      | 3406 | SRDAHFHPRLINLMNEDA-SLSSFEKEEYKVPWMLLWLSHILYVDKVPQALQPVVERLAAEYPQAVIYPPGISK          | 3484                                         |      |
| SCORPION    | 3441 | NLNAKFPRLQLIIEVYP-DTIPEFIAKSKVPCWMLGSINQLLTLDDKPEATAVQYIIEIGTNFPNALVYPPKLSY         | 3519                                         |      |
| ALVINELLA   | 3378 | CSEARQRPRLQLTEQYP-ENMSLFIQKTSVPTWMLGWISQITALLDKPESPAIQDILKRLAVEYPPQAVVYPPKMSC       | 3456                                         |      |
| CAPITELLA   | 3419 | SKDARQLFPRLQLIIEVYP-QTRVFIKRSRDIIPAMWMLGWISQICALLDKPESPAIHEILINADIYPNALVYPPKLSN     | 3497                                         |      |
| SPONGE      | 3481 | SSKARELFPRLQLVEAHP-DTMDLINSKSTIPCWMLGWISQIMIALVVKPESRAVHDILIRIADTYPQSLIYAFRMS       | 3559                                         |      |
| OYSTER      | 3431 | SMEARQRPRLQLVEMYP-EIRSTFVBEKQVPCWMLMWISQIMALLDKPEGSTVHHILTELAETYPQAVVYPPKLS         | 3509                                         |      |
| SNAIL       | 3436 | SAEALERFPRLQLIIEHYD-DTDMFLKKSSTIPSWMLLWISQIMALLDKHQAHAVRPIILRIATEYPQAVIYPPHISQ      | 3514                                         |      |
| TRICHOPLAX  | 3450 | SMDARQRPRLQLIIEVYRNP-NTIDGFMKRSAPISWMLIGWISQIMALLDKPEARAVQBIILFRIADEYPAIYAFKVS      | 3528                                         |      |
| SEA ANEMONE | 3449 | SEEARNRPRLQLIIEVYRNP-TLDSFVVKVEVTPCWMLIGWISQIMVALMDKKEARAVHGIIVTEIAKNYPQALCYAFKVS   | 3527                                         |      |
| PRIAPULA    | 3475 | SSEARDSFPRLQLIIEVYRNP-DTLPPLTSKVESVPCWMLIGWISQIMVALMDKREARAVQGLLSIAESYPQALYPLNRS    | 3553                                         |      |
| ESHARK      | 3476 | SKEARLFPRLQLIIEVYRNP-ETLDMKKEVSVPCWQFVIGWISQIMVALMDKKEAVVQHIIEEIAESYPQAVIYVPLMIS    | 3555                                         |      |
| STERLET     | 3480 | SKEARLFPRLQLIIEVYRNP-ETLDMKKEVSVPCWQFVIGWISQIMVALMDKKEAVAVQHIIEEIAEYYPQAVIYVPMIS    | 3559                                         |      |
| COELACANTH  | 3474 | SREARLFPRLQLIIEVYRNP-ETLDMKMGVSVPCWQFVIGWISQIMALLDKKEAVAVQHIIEEIAESYPQAVIYVPMIS     | 3553                                         |      |
| HUMAN       | 3458 | SNEARLFPRLQLIIEVYRNP-ETLSLMTKEISSVPCWQFVIGWISQIMVALMDKQAVAVQHSVEEITDNPQAVIYVPMIS    | 3537                                         |      |
| CAECILIAN   | 3477 | SKDARLFPRLQLIIEVYRNP-ETLDMTKEISSVPCWQFVIGWISQIMVALMDKKEAVAVQHIIEEIAEYYPQAVIYVPMIS   | 3556                                         |      |
| PLATYPUS    | 3465 | SREARLFPRLQLIIEVYRNP-ETLDMTQEISSVPCWQFVIGWISQIMVALMDKKEAVAVQHIIEEIAEYYPQAVIYVPMIS   | 3544                                         |      |
| CANARY      | 3466 | SREARLFPRLQLIIEVYRNP-ETLGLVTOELSSVPCWQFVIGWISQIMVALMDKDEAVAVQHIIEEIAEYYPQAVIYVPMIS  | 3545                                         |      |
| OSTRICH     | 3436 | SREARLFPRLQLIIEVYRNP-ETLGLVTRVLSVPCWQFVIGWISQIMALLDKDEAVAVQHIIEEIAEYYPQAVIYVPMIS    | 3515                                         |      |
| TURTLE      | 3475 | SRDARLFPRLQLIIEVYRNP-ETLGLMAREISSVPCWQFVIGWISQIMVALMDKKEAVAVQHIIEEIAEYYPQAVIYVPMIS  | 3554                                         |      |
| ALLIGATOR   | 3433 | SREARLFPRLQLIIEVYRNP-ETLSLMAQEIISVPCWQFVIGWISQIMVALMDKDEAVAVHHTVEEIAHNPQAVIYVPMIS   | 3512                                         |      |
| SOFTCORAL   | 3478 | SAEARKFPRLQLIIEVYRNP-GDIEAFKRKSSVPCWQFVIGWISQIMVALMDKREHAVQGIQLDIAKHYYPQAVIYVPMIS   | 3551                                         |      |
| STONYCORAL  | 3482 | SKEARQFPRLQLIIEVYRNP-TLEAFVKKAADVPCWMLIGWISQIMVALMDKDEAVAVQHIIEEIAEYYPQAVIYVPMIS    | 3566                                         |      |
| ACORN WORM  | 3469 | SVEARQFPRLQLIIEVYRNP-DTMDTFVELTSETPCWMLIGWISQIMVALMDKVEISVQGIILIEIANYPQAVIYVPMIS    | 3547                                         |      |
| LANCELET    | 3493 | SPEARQFPRLQLIIEVYRNP-DTMDLFIKESVHPVSWLCSWGLQMVALLDKPEARAVHGIILTRIAEQYYPQAVIYVPMIS   | 3571                                         |      |
| SEA URCHIN  | 3495 | SPEARQFPRLQLIIEVYRNP-DTMOQLVKKASIIIPSWMLIGWISQIMVALMDKPESLAVQGLLKAIAKDYYPQAVIYVPMIS | 3573                                         |      |
| STARFISH    | 3504 | SQEARQFPRLQLIIEVYRNP-DTMOQLMIKESVPCWMLIGWISQIMVALMDKPEGPAVHGILTDIAEYYPQALCFPPKISS   | 3582                                         |      |

Supplementary Figure 3: DNA-PKcs COBALT Metazoa Vertebrate Invertebrate

|             |      |                                                                                       |                |      |
|-------------|------|---------------------------------------------------------------------------------------|----------------|------|
| TERMITE     | 3414 | EKYNLESGHVSL--KALVDQLASLFTD--PV--IDIFLRAFSCLGQPRKMLYHFVEKLEQLLNA                      | KRPNC---DSLH   | 3481 |
| SHRIMP      | 3485 | QQYNF--SSHEGKLAAMCDKVEALSSHk--L--LHQFVSAMSLMVPVSIACKDAIQNVLQEKDK                      | QKMEE----GLS   | 3552 |
| SCORPION    | 3520 | EMYKFPDPLQCKENKEFVVKMLKSSLSQk--L--VDFVNALDLSVPELLEYKEYFKEILQMKKD                      | -KGDG---NEIV   | 3588 |
| ALVINELLA   | 3457 | DGYKFSNDEQKKAAMVIRVNEELSKN--PL--IGKFINALEQLGQPDLSFKDWYQNLWEKECF [2]                   | PEKNK---THIL   | 3528 |
| CAPITELLA   | 3498 | HNYKFTSDAVSSKSKVCDRLHQMLSKN--PL--IDRLIFSLMMHPEPAVLIKDWIMDMKNKAGP [2]                  | SSQSL--smAYVK  | 3571 |
| SPONGE      | 3560 | SGYKFGHN--NSEGKELFEKLEKQLSQ--L--MDEFIAALEQLNSPELAWKDWYDNLKPLV [4]                     | PKRDK---NAIK   | 3630 |
| OYSTER      | 3510 | EGYKF--TNNKDEAFVTKLSTLGDqLPL--VPKFISALEHMSQPDQIFKDFDDTRLK--F [2]                      | NKPKD--ka--MK  | 3577 |
| SNAIL       | 3515 | ESFTFGSTAEARRNKQGIIEELDALLSEErVPL--VRTFTISALEQFSQVPMFQDWSRDTI-K--I [2]                | KRPAA--e---IK  | 3584 |
| TRICHOPLAX  | 3529 | EQYTFEETSVGRQNKFAVSKLSSKLQL--PL--IESFVRALEQLSQPDLVFKDWVDE--VKGL-K                     | KKSGS--iaESIR  | 3597 |
| SEA ANEMONE | 3528 | EQFVFDSSPEGNTNRKAVERIKRLLES--PL--MDSFIAALEQLHNPMAFKDWDCGEIKQLLQ                       | TKNKK----AIK   | 3595 |
| PRIAPULA    | 3554 | EHYTFVDAAGAEAEAYLHRLLATLSTC--mdMSqLQQLVASLEQLSSPHMLFSDFVADARPLM- [1]                  | RRADF--pa--RFR | 3627 |
| ESHARK      | 3556 | ESYTFEQTARGNTNKEFVRLKNDLKG--GM--VEVFINSLEQLSNPDLFKDWVDFNRSKLEK                        | KE--NK---TQLK  | 3624 |
| STERLET     | 3560 | ENYVFEEDSATGHRNKEFVARLKSQLDKG--GV--VKNFIDALQQLTNPMLFKDWVDEVKKLEK                      | PKTDC---KLLK   | 3629 |
| COELACANTH  | 3554 | ESYSFPEESPCKRQNKFAVSKLSSKLQL--PL--IESFVRALEQLSQPDLVFKDWVDE--VKGL-K                    | PQRNK---ANLK   | 3623 |
| HUMAN       | 3538 | ESYSFKDTSTGHNKEFVARIKSKLDQG--GV--IQDFINALDQLSNPELLFKDWSDVRLELAK                       | TPVNK---KNIE   | 3607 |
| CAECILIAN   | 3557 | ENYSFEDTATGHNKEFVARIKSKLDKG--GM--VQDFIQSLEQLSNPDMFKDWIEDMKNELAK                       | SQRNK---NNIK   | 3626 |
| PLATYBUS    | 3545 | ENYSFKDTSAGHNKEFVTRIKSKLDKG--GV--VQDFIQALEQLSNPEMLFKDWVDEIKIELTK                      | TPINK---NNLK   | 3614 |
| CANARY      | 3546 | ESYCFKDTAAGCKNKEFVERIKSKLDKG--GV--VQDFVHSLEQLSNPVMFKDWVDEVRNLSK                       | PQRNK---KLLK   | 3615 |
| OSTRICH     | 3516 | ESYSFPEETVTCGNKKEFVARIKSKLDQG--GV--VQDFVHSLEQLSNPMLFKDWVDEVRNLSK                      | TQRNK---NNLK   | 3624 |
| TURTLE      | 3555 | ENYSFKDTSAGHNKEFVARIKSKLDKG--GV--VQDFVHSLEQLSNPMLFKDWVDEVRNLSK                        | TQRNK---NNLK   | 3624 |
| ALLIGATOR   | 3513 | ENYSFKDTSAGHNKEFVARIKSKLDQG--GV--VQDFVHSLEQLSNPMLFKDWVDEVRNLSK                        | AQRNK---AKLK   | 3582 |
| SOFTCORAL   | 3552 | EQFKFGGSIIEQKNKEFVSLNESLSP---PA--SDDLQALEQLTNPMLFKDWVDE--VKVLLS                       | TKGNA---VKLR   | 3619 |
| STONYCORAL  | 3567 | EHFVFEEDSATGHRNKEFVARLKSQLDKG--GV--VKNFIDALQQLTNPMLFKDWVDEVKKLEK                      | PKTDC---KLLK   | 3629 |
| ACORN WORM  | 3548 | ENYSFPEETVTCGNKKEFVARIKSKLDQG--GV--VQDFVHSLEQLSNPMLFKDWVDEVRNLSK                      | TQRNK---NNLK   | 3624 |
| LANCELET    | 3572 | ENYFPEEDSVTCGNKKEFVARIKSKLDQG--GV--VQDFVHSLEQLSNPMLFKDWVDEVRNLSK                      | TQRNK---NNLK   | 3624 |
| SEA URCHIN  | 3574 | EDFKLGDKSKEKRDVAVKIEIDILSTV--PL--VENLITLALQRLTHPQFIFKDWISVINKMN- [2]                  | ERDHP--a--IK   | 3643 |
| STARFISH    | 3583 | ESFTFDESNTGRKNASARKIGAILLES I--PL--LDDFICALEQLNNPEFVKDWISVINKMN- [2]                  | AKRDK--nk--IR  | 3653 |
| TERMITE     | 3482 | HMVDTMMK-ELFPSS [1]--gkiHGALf-----KDIQYRKRLEK--AESNICKGNKKVLDKICFIKEKLYIIQ [2]        |                | 3546 |
| SHRIMP      | 3553 | EIVSEFLK--VQNR [3]NaekGEAYT-----RDRAKQMAEAFTKAFGENLKKASLS-IRDIQRELGSMDRVLQ [3]        |                | 3625 |
| SCORPION    | 3589 | KLYKKLCH-ELFNYN [1]RDkmkERKlhl-----KVAKCGSVVFPSEFGKDGKLIIMP-LKEASVYETLLKKIT [2]       |                | 3657 |
| ALVINELLA   | 3529 | THYKDMYD-QLLATE [1]-----ndKGPYTRFAEYRDRFNHAFGTGGEKQQFT-YAKFQEEGNKILQKIN [3]           |                | 3595 |
| CAPITELLA   | 3572 | ERYQELRY-KLLCIE [2]DgslYSDSAdcsMGPYRSDVVKQFISQFDEYFGKMGSKIPGLT----FMKVLWSLSDKSE [6]   |                | 3649 |
| SPONGE      | 3631 | RVNEQMS-QLLETR [6]SLyggSPSLq--KGARQTFPAQYAKNIEDKFGKGAKISMS-GTQLASAFNEVYNKMR [3]       |                | 3710 |
| OYSTER      | 3578 | QTeetLSMvd--KGYPKRFAERFKKDVSDCFGNKGEKILDMs---FSKLAGAYKVKYK [7]                        |                | 3663 |
| SNAIL       | 3585 | KKYKEIYD-MLEEM- [12]QT--sFgAVs--MGFHRRAEAVFKNEFDNHFGVDSKLVMT-----AKFSGILRNL-- [7]     |                | 3666 |
| TRICHOPLAX  | 3598 | ICYQLRDLGLVDAS [4]AasslTSGEliefGSHKRRFIQHFQKVIQYFQKDGSKLQMS-ASDFEKIASRLIQEIS [1]      |                | 3676 |
| SEA ANEMONE | 3596 | EAFRSIYK-ALGDFS [4]TDssqPAAE--emGPFRRFVSKHSHARFENIFGKDGKLVNMS-LKTAK----LQKQMV         |                | 3665 |
| PRIAPULA    | 3628 | KIYASLFD-TTRR-- [2]EE---PG-g--RGRYWSVTRTWAREVEEKCGRDGSKLLAMA-AADANQVLSALGKEMK         |                | 3693 |
| ESHARK      | 3625 | NLYSEMYS-NLANAG-----APGI---GAFRRRFTGFKKKIQDFHGKDLGLLNMN-LKAFNVAVGQIMETQ-              |                | 3687 |
| STERLET     | 3630 | NMYEMYS-ALGNPR-----CQGI---GAFRRKFAQHFSEKFDKTFGKGAKLFDK-HDAFRKASDSLWGSIS [2]           |                | 3695 |
| COELACANTH  | 3624 | RMYEMYA-NLGNLR-----APGL---GSFRSNFVKAYGKEFERYGKRGKLLDMK-SSDFPKVSDQLTSM-                |                | 3686 |
| HUMAN       | 3608 | KMYEMRY-ALGDPK-----APGL---GAFRRRFTGFKGKDFKHFGGSKLLRMK-LSDFNIDITNMLLLKM-               |                | 3670 |
| CAECILIAN   | 3627 | KIYEMYM-NLGNLK-----APGI---GAFRRRFTGFKGKDFKHFGGSKLLRMK-LSDFNIDITNMLLLKM-               |                | 3689 |
| PLATYBUS    | 3615 | RYEMMYK-TLGNLF-----APGL---GAFRRRFTGFKGKDFKHFGGSKLLRMK-LSDFNIDITNMLLLKM-               |                | 3677 |
| CANARY      | 3616 | MYERMYK-NLGNLE-----SPGL---GMMRKRFIQAFGKDLDFHFGGSELLNMK-TSDFDAIANSLSHSM-               |                | 3678 |
| OSTRICH     | 3586 | DMYERMY-NLGNLE-----APGL---GLLRRRFTGFKGKDFKHFGGSKLLRMK-LSDFNIDITNMLLLKM-               |                | 3648 |
| TURTLE      | 3625 | MYEMMYR-NLGLDQ-----APGL---GLLRRRFTGFKGKDFKHFGGSKLLRMK-LSDFNIDITNMLLLKM-               |                | 3687 |
| ALLIGATOR   | 3628 | MYEGMYG-NLGNLQ-----ASGL---GLLRRRFTGFKGKDFKHFGGSKLLRMK-LSDFNIDITNMLLLKM-               |                | 3645 |
| SOFTCORAL   | 3580 | ESYEGMSK-KLLNVK KRgtnSDGL--eFGSIRRRFAEFSGNVVKVCGEDGSKIDMS-IKAFESAMKTITNEKMK [1]       |                | 3691 |
| STONYCORAL  | 3639 | QCFGAMFQ-LLMDCR [3]KSgsqTRGT--eSGPFRTKFAQEFANEVQRIFGKEGKLVGVK-MTDFSKWCRDIQQK [2]      |                | 3714 |
| ACORN WORM  | 3621 | GLYTRVFD-S----- [12]DSdavTQSLp--FGPFQKFAFDVFKPFQKRFGERGCKLISMqHQKEFMNFRNEVDQLM [1]    |                | 3699 |
| LANCELET    | 3650 | LYDDEMYD-LLDLFR [15]SSdesQSVg--FGPFRFRFAQFQFAKECEKMFQKDGSRILDMK-LSDFNIDITNMLLLKM [10] |                | 3745 |
| SEA URCHIN  | 3644 | QYQQLYQ-QLF--- [11]SS-----QTVe--PGPYWKFGRWQKRFDSFQDGSKLAAMD-YKTWS---KLQDQIC [3]       |                | 3717 |
| STARFISH    | 3654 | QACHEIYM-NLINH [15]SS-----PSVg--FGNFRFRFAQEWQKFAAFGKDGTKVIDMQ-LKTFSEHYGKLYKEMA [3]    |                | 3738 |
| TERMITE     | 3547 | ---KPPVQLKDYSPWLSEFGgKHCFLLELEIPGQYTGESKPLIQHHVKIAGFKQTVVPMKTLRLPLQVTFIIGSDAKEHQ      |                | 3622 |
| SHRIMP      | 3626 | EBMRKLPRLQKAYSPWANFQA-SKYSVLELPGQYTGMSKPLPEYHVKISSFDENVLLMSMRVPMRIIRGDDEKEYK          |                | 3704 |
| SCORPION    | 3658 | -SEMNKELRLRDFSDLSEFHS-IKYSEIDIEIPGQYTGKRRKPIPEHHVKICNFQKVDLILSLTKPRCLTIRGNDQKDYK      |                | 3735 |
| ALVINELLA   | 3596 | ---KPPEDIAEYSEWANFQA-CEFDQIEIPGQYIGKAKPLPYHTKISSFHSVVKTLQSMRKPKRIVIRGNDQKEYP          |                | 3670 |
| CAPITELLA   | 3650 | --SNKQPRKLEYSQWLABFQA-GNHEASLEIPGQYTGVEVCLPEYHAKISSFDQVTVLRSRMPKSIIVIRGNDQKEYP        |                | 3726 |
| SPONGE      | 3711 | -NKFSSALLKDYSPWLDTRFQ-EDYLVQIEVPGYDGRSKPLPEYHAKITRFDKVLILSLRKPRLTIIGDDTREYM           |                | 3788 |
| OYSTER      | 3664 | EKNLPPANLKDYQWLANFNP-SIQGKLEIPGQYDGVKPMPEYHAKIVGFDQRVVMTSIRKPKRITIRGNDQKEYP           |                | 3742 |
| SNAIL       | 3667 | KADLTPPTNIGKYCSWMANFNP-NHESRELEIPGQYDGRSKPLPEYHAKIVGFDQRVVMTSIRKPKRITIRGNDQKEYP       |                | 3745 |
| TRICHOPLAX  | 3677 | -KIKNRPENLKEYCPWLSNFQA-ANFTYSIEVPGQYTGSRKPLPEYHAKISGFERLLVLSIRKPLRLTVQGDDEKEYL        |                | 3754 |
| SEA ANEMONE | 3666 | ---SKPPGNLKEYSPWLTNFQA-DSHAQKLEVPQYTGQSKPMPEYHVNIAGFDEKVLVLSIRKPKRVTIRGDDERDHY        |                | 3741 |
| PRIAPULA    | 3694 | TKAADSPGNLKEYSTWLTDFHS-SPATCQIEIPGQYDGRSKPMPEYHAKIAGFDEKVLVLSIRKPKRITIRGDDERDHY       |                | 3772 |
| ESHARK      | 3688 | -KPEPPGNLKEYSPWMSNFKP-QFLGNELEIPGQYDGVKPMPEYHAKITGFDERVKVMSIRKPKRITIRGNDQKEYP         |                | 3764 |
| STERLET     | 3696 | QKKEPEPNLKEYSPWMSNFKP-EVLRNELEIPGQYDGVKPMPEYHAKITGFDERVKVMSIRKPKRITIRGNDQKEYP         |                | 3774 |
| COELACANTH  | 3687 | RKFQREPGLKEYSPWMSQFKP-EFLRNELEIPGQYDGVKPMPEYHAKITGFDERVKVMSIRKPKRITIRGNDQKEYP         |                | 3765 |
| HUMAN       | 3671 | NKDSKPPGNLKEYSPWMSDFKV-EFLRNELEIPGQYDGVKPMPEYHVRIAGFDERVTVMASLRPKRITIRGDDERDHY        |                | 3749 |
| CAECILIAN   | 3690 | RGSQPEPNLKEYSPWMSNFKP-EFLRNELEIPGQYDGRSKPMPEYHAKISGFDERVKVMSIRKPKRITIRGNDQKEYP        |                | 3768 |
| PLATYBUS    | 3678 | KESSKPPGNLKEYSPWLSDFRV-EFLRSELEIPGQYDGVKPMPEYHAKITGFDERVKVMSIRKPKRITIRGDDERDHY        |                | 3756 |
| CANARY      | 3679 | IKTHKEPNLKEYSPWMSNFKP-EVLRNELEIPGQYDGVKPMPEYHAKISGFDERVKVMSIRKPKRITIRGDDERDHY         |                | 3757 |
| OSTRICH     | 3649 | TKSHKEPNLKEYSPWMSNFKP-EVLRNELEIPGQYDGVKPMPEYHVRIAGFDERVKVMSIRKPKRITIRGDDERDHY         |                | 3727 |
| TURTLE      | 3688 | KD-QKEPNLKEYSPWMSDFKA-EFMRNELEIPGQYDGVKPMPEYHAKISGFDERVKVMSIRKPKRITIRGDDERDHY         |                | 3765 |
| ALLIGATOR   | 3646 | RDGQREPGLKEYSPWLSDFKA-EFMRNELEIPGQYDGVKPMPEYHAKISGFDERVKVMSIRKPKRITIRGDDERDHY         |                | 3724 |
| SOFTCORAL   | 3692 | ---KPFVGNLKYSPWANFQT-QSETIQLEIPGQYSGQSKPLPEYHVKIVGFEKVKVMSLRAPKRITIRGDDERDHY          |                | 3767 |
| STONYCORAL  | 3715 | RNRTPPPGNLKEYSPWLSDFQS--NNFTHTLEIPGQYDGVKPMPEYHAKIVGFEKVKVMSLRAPKRITIRGDDERDHY        |                | 3793 |
| ACORN WORM  | 3700 | KKKMSAPGNLKEYSPWLSDFQP--INYEKELEIPGQYKGRSKPLPEYHVKIVGFEKVKVMSLRAPKRITIRGDDERDHY       |                | 3778 |
| LANCELET    | 3746 | KANCYAPGLLKYCPWLSDFNP-LDYDRELEIPGQYTGKVKPLMZYHAKIAGFDRVQVMSLRAPKRITIRGDDERDHY         |                | 3824 |
| SEA URCHIN  | 3718 | TPGKDDPNLKEYSPWTFATQT-LRGD-ELEIPGQYDGVKPMPEYHVKIVGFEKVKVMSLRAPKRITIRGDDERDHY          |                | 3795 |
| STARFISH    | 3739 | ---RDPGNLKEYSPWTFDFQ--LSYDRELEIPGQYDGVKPMPEYHVKIVGFEKVKVMSLRAPKRITIRGDDERDHY          |                | 3814 |



Supplementary Figure 3: DNA-PKcs COBALT Metazoa Vertebrate Invertebrate

|             |      |                                                              |                                                                |                     |      |
|-------------|------|--------------------------------------------------------------|----------------------------------------------------------------|---------------------|------|
| TERMITE     | 3848 | TGLFRETMIHCLRTLRLNNDYDMLLATMEVFVQEPSIDWLEFASRHESLNKKSHEESQT- | ---                                                            | WYPQKLDLAKLKE       | 3919 |
| SHRIMP      | 3919 | VGMLREIMVSLGALQESRHLVLTAVLEAFVKEPKDWLDFVQKQ-----EGDTQ[       | 2]                                                             | KVELFSSKRIELLNDKLS  | 3987 |
| SCORPION    | 3963 | KGVIEATMISALSAALRDNADILLNTMDIFIKEPTVNWQENALKQKRIIGKVDENVDSD[ | 18]                                                            | DFNWYPKQRILFAKRRKE  | 4056 |
| ALVINELLA   | 3898 | KGLFESTMIHVLRALRDNQDIIINTMDVFIKEPSLDWQANMRELNQMQSCDENHEDI[   | 17]                                                            | DPHWYPAKAVAFACRKLN  | 3990 |
| CAPITELLA   | 3957 | KGVIEGTMVHSLRALRQHKELISTMDVFIKEPSLDWQNAAKKEIQAMSNRKEBTSKL[   | 2]                                                             | DSQWFPKQKVNIVRQKLE  | 4034 |
| SPONGE      | 4011 | SGQLRSCMIHTLRLALRHSPTLLNTMDVFIKEPSLEWESNAKKQALA----QKINTD    |                                                                | DNTWYPKEKVNICRKKLL  | 4081 |
| OYSTER      | 3966 | HGLMESTMIHVLRALRNCDDLNTMDVFIKEPSLDWLVNAEKQMNEMKVEVSPEDDEV    |                                                                | --QWYPKEKIEYVRRKLR  | 4039 |
| SNAIL       | 3973 | KGLLENTMIHVLHALRQNHDDLSTMDVFIKEPSLDWLFQAFERQMRGGMGPKDAEDDM   |                                                                | --RWYPKQKIEAARAKLK  | 4046 |
| TRICHOPLAX  | 3983 | NGQLCSVMHVLRALRNPDDLNTMDVFIKEPSLDWQNFANRQNAKQG--LKTESD-      |                                                                | DFSWYPREKVTFAKRRKL  | 4055 |
| SEA ANEMONE | 3961 | SGLVNRTMIHVMRALRGNHELLNTMDVFIKEPSLDWQMFARKQAEDQHMEIGMYE-     |                                                                | DLTWYPREKVLTAQRKLE  | 4035 |
| PRIAPULA    | 4011 | RGLLYQTMVHTLRLALRDNHRLLLNTLDVFIKEPSIDWKATAERLADKDIHSNESDQGE[ | 1]                                                             | VQEWYPKQITIGVARSKLI | 4087 |
| ESHARK      | 3990 | SGLIRSIMVHGLRAFRLDPDLLSTMDVFIKEPSLDWKNLELQMKKGGTWNKDVNTR     |                                                                | EIHWYPMQKRVYARRKLE  | 4065 |
| STERLET     | 3999 | SGQIYSVMVHSLRAYRADPDLNTMDVFIKEPSLDWKNFELKQMKKAGSWEAVNTK      |                                                                | EINWYPMQKVNFAARRKLE | 4074 |
| COELACANTH  | 3996 | QGLIYSVMVHSLRAYRNPDDLNTMDVFIKEPSLDWKNFELKQLKKGGSWTKEVNTK     |                                                                | DFSWYPLQKVKCGRRKLE  | 4071 |
| HUMAN       | 3977 | TGLMYSIMVHALRAFRLSDPGLLNTMDVFIKEPSLDWKNFEQKMLKKGGSWQIEINVA   |                                                                | EKNWYPRQKICYARRKLA  | 4052 |
| CAECILIAN   | 3992 | SGLIYSVMVHALRAYRTPDPLNTMDVFIKEPSLDWKNFELKQLKKGGSWTKEVNTA     |                                                                | EKNWYAVQKVNCAARRKLA | 4067 |
| PLATYPUS    | 3984 | SGLVYSVMVHALRAFRLDPDDLNTMDVFIKEPSLDWKNFELKMLKKGGSWTKEVNTA    |                                                                | DTNWYPLQKISYARRKLT  | 4059 |
| CANARY      | 3985 | WGLIYSVMVHALRAYRSDPDLNTMDVFIKEPSLDWKNFEQKQLKKGGSWTKEINTS     |                                                                | EVNWYPLQKVNVRARRKLT | 4060 |
| OSTRICH     | 3955 | DGLIYSVMVHALRAYRNPDDLNTMDVFIKEPSLDWKNFEQKQLKKGGSWTKEINTS     |                                                                | EVNWYPLQKVNVRARRKLT | 4030 |
| TURTLE      | 3993 | SGLIYSVMVHSLRAYRTEPDLVSTMDVFIKEPSLDWQNFELKQLKKGGSWTKEVNTA    |                                                                | EINWYPLQKVNCAARRKLA | 4068 |
| ALLIGATOR   | 3953 | SGLIYSIMTHALRAYRNPDDLNTMDVFIKEPSLDWKNFELRLKKGGSWTKEVNTC      |                                                                | EVNWYPLQKVNCAARRKLA | 4028 |
| SOFTCORAL   | 3995 | SGQLQSTMVYTMRALRNNHEILLNTMDVFIKEPSLDWQNFARKQAQAEKQKLNLDNM-T- |                                                                | DLAWYPKKINSARRKLE   | 4068 |
| STONYCORAL  | 4022 | SGTLQSVMIHTLRLALRSHDDLNTMDVFIKEPSLDWQNYARKQAKTQG--INEEQ-     |                                                                | KADWYPKQKVSARRKLE   | 4094 |
| ACORN WORM  | 4007 | DGLIYSVMVHGLRALRNPDDLNTMDVFIKEPSLDWQ----KRAKSDASKYGDAA--[    | 5]                                                             | MIERYPKADRIINARRKLE | 4081 |
| LANCELET    | 4055 | SGLLQSTMVHVLRALRSPNVLNTMDVFIKEPHLDWK----NFAAKQMDKGMVGE--[    | 5]                                                             | DISWYPREKIKFAARRKLE | 4129 |
| SEA URCHIN  | 4025 | DGVLQSTMVHTLRLALRQHELLNTMDVFIKEPSLDWKNFAVKQADYQKLS-----[     | 5]                                                             | DISWYPKKIKFAARRKLE  | 4098 |
| STARFISH    | 4044 | BGILQSSMVHTLRLALRQHELLNTMDVFIKEPSLDWKNFASKQAQAKQKADAGRVLQEQ[ | 8]                                                             | DESWYPREKVNFAARRKLE | 4127 |
| TERMITE     | 3920 | GANPVTITTEELKAGF                                             | KDSKYLAKFLECVKG--HNSVRSQMPSYQLPEEQVDSLLDQATDYNILGKTWQGWEPWM    | 3993                |      |
| SHRIMP      | 3988 | DINPAYITLWAVSQNK[                                            | 2]AKQKAYENLQVVLGDRGESVRSVGERGLSTHQVDILLEQATDPNILGRSWIGWDFPL    | 4065                |      |
| SCORPION    | 4057 | GINPCYITKEELRIGH                                             | SNKPIFQRLTVDCLGDRK--SLRQNLPKNGLSVKQVKSLLIDQATDSDGILSRIFYGWDPWF | 4131                |      |
| ALVINELLA   | 3991 | GHNPAHITRDELVQGH                                             | KGKTYCCKAAKVVLGDPHEHDIRAKLPPKCLTVEEQVAACLINQATDGNILSRVFCGWEPWM | 4066                |      |
| CAPITELLA   | 4035 | GSNPSHVMRAELALGQ[                                            | 2]---SYLKYFVIVLMDGKQADIRARLPADGLSSEEQVAALLNLTADPNILGRTFAGWEPVW | 4109                |      |
| SPONGE      | 4082 | GFNSHMLMLIDLEHGF                                             | KNKPEFKYLKGLLGDSTNLRARVGRKCDSEVDQVDCLDHATDSNVLGRTYGWEAWV       | 4157                |      |
| OYSTER      | 4040 | GDNPCVISREBELKIGH                                            | SKKPAFPALEVRVLQGDKRENVRARQLPASGLTVEQVAALIDQATDPNIVGRVWGWEPWM   | 4115                |      |
| SNAIL       | 4047 | GDNPSYITRDELRLIGH                                            | LRNQAALKDFEVALGDVQDNIRARLKEKGLTEEQVAALIDQATDPNILGRVWGWEPWL     | 4122                |      |
| TRICHOPLAX  | 4056 | GANPAFVTRDELRLIGH                                            | H---LSILESALGDKQYNERARMPADNLSEVDQVTCCLIDQATDPNILGRWGWEPWM      | 4127                |      |
| SEA ANEMONE | 4036 | GANPAFVTRDELRLIGH                                            | RRRSWFRNLQSAACLDGRRHNVRAQKEENELTSEAQVDCCLIDQATDPNIVGRVWGWEPWM  | 4111                |      |
| PRIAPULA    | 4088 | GANPAHITKAEALALGH                                            | RKHEALQMTNVAVLGDRPSDLRAQLPPEGLTVEQVQVCIIEQATEPSLLGRTWGWEPWM    | 4163                |      |
| ESHARK      | 4066 | GANPAAITRDELRLIGH                                            | ETTEAYKSYVAVMGDKHEHNRARVPEGLSVEIQVDCCLIDQATDPNIVGRVWGWEPWM     | 4141                |      |
| STERLET     | 4075 | GANPAVITSEELKLG                                              | EKSPAYQSI IAVAQGEKHNVRAREAPQGLSVETQVECLIDQATDPNILGRVWGWESVW    | 4150                |      |
| COELACANTH  | 4072 | GVNPIVITCNELRLIGH                                            | EKLSAYQSYLAVVKGDPDHNVRAREVKEDLPVETQVACLIDQATDPNIVGRVWGWEPWM    | 4147                |      |
| HUMAN       | 4053 | GANPAVITCELELLGH                                             | EKAPAFRDYVAVARGSKDHNIRAEPESEGLSEETQVKCLMDQATDPNIVGRVWGWEPWM    | 4128                |      |
| CAECILIAN   | 4068 | GNPAAITCELELLGH                                              | EKSVAYKEMKAVAMGDKTHNVRAREPKDGLTEETIQVKCLLDQATDPNIVGRVWGWEPWM   | 4143                |      |
| PLATYPUS    | 4060 | GNPAAITCELELLGH                                              | EKVPAFGDYISVARGSKDHNVRARQPEEGLSEEQVQVCLIDQATDPNIVGRVWGWEPWM    | 4135                |      |
| CANARY      | 4061 | GANPAITCELELLGH                                              | ERSPAYNDFAAVARGNSNHDIRAKEPEDGLSEETQVRCCLIDQATDPNIVGRVWGWEPWM   | 4136                |      |
| OSTRICH     | 4031 | GCNPGRITCELELLGH                                             | EKSPFFSDFVAVARGNAAHNTRAKEPEDGLSEETQVKCLIDQATDPNIVGRVWGWEPWM    | 4106                |      |
| TURTLE      | 4069 | GANPAVITCELELLGH                                             | EKSPAYKEYVAVARGSRDHNIRAKEPEDGLSEETQVRCCLIDQATDPNIVGRVWGWEPWM   | 4144                |      |
| ALLIGATOR   | 4029 | GSNPAAITCELELLGH                                             | EKSLAYRDYVAVARGTRDQNIIRAKEPEDGLTEETQVKCLIDQATDPNIVGRVWGWESWM   | 4104                |      |
| SOFTCORAL   | 4069 | GNPAAITCELELLGH                                              | KKAGYIEMLSVLLGDRQNRARHYVN--TVENQVACLIDQATDPNIVGRVWGWEPVW       | 4142                |      |
| STONYCORAL  | 4095 | GFNPAYVMRDLDLQGH                                             | SKQSWYKQMESVCLGDRNANVRAREPESEGLSVESQVSCCLIDQATDANILGRWGWEPVW   | 4170                |      |
| ACORN WORM  | 4082 | GANPCHITRDELKLM--[                                           | 3]IKKHYCTGYIDVCMGDKKYSMRTREPATGLSVEKQVACLVDQATDPNIVGRVWGWEPVW  | 4158                |      |
| LANCELET    | 4130 | GVNPTHITKAEELQGH[                                            | 4]WFKSFCL----VAMGDGKDVRAQKPAEGLSVEDQVACLIDQATDPNIVGRWGWQSFM    | 4205                |      |
| SEA URCHIN  | 4099 | GVNSTYITKAEELMGP[                                            | 4]ARDAPFLKALKSTCGGNTESKRAQSKSKGLSVEDQVACLIDQATDPNIVGRVWGWEPVW  | 4178                |      |
| STARFISH    | 4128 | GANPSDITQRELLALGH                                            | SRNPAFSAIKEVVLGDRSQNIRASSPKSGLSVETQVECLIDQATDPNIVGRVWGWEPVW    | 4203                |      |
