# Supplementary material for: Uncovering DNA-PKcs ancient phylogeny, unique sequence motifs and insights for human disease
Source: PubMed Central journal article supplement — Prog Biophys Mol Biol. Author manuscript; Available in PMC 2022 Aug 1. (PMC8021618; doi:10.1016/j.pbiomolbio.2020.09.010), 2020-10-06
Supplement: NIHMS1638735-supplement-5.pdf [file NIHMS1638735-supplement-5.pdf]

**SUPPLEMENTARY FIGURE 4: Clustal Omega alignment of representative DNA-PKcs sequences from all major phyla (short list).** DNA-PKcs sequences from representative species from all major phyla were compiled and analysed by Clustal Omega using default settings. The % sequence ID is from Clustal Omega. In the alignment, identical amino acids are indicated by \* (blue/bold), highly conserved amino acids by : (blue), and similar amino acids by . (purple). The human sequence is highlighted in yellow. The catalytic amino acids are in red and the autophosphorylation sites and highlighted in blue. For additional information on organisms and scientific names please see Supplementary Table 1.

| Sequence      | Genus Species                     | Alternate name/identifier | Percent ID   |
|---------------|-----------------------------------|---------------------------|--------------|
| HUMAN         | <i>H. sapiens</i>                 |                           | <b>100</b>   |
| ESHARK        | <i>Callorhinchus milii</i>        | Elephant shark            | <b>62.31</b> |
| LANCELET      | <i>Branchiostoma belcheri</i>     |                           | <b>43.54</b> |
| STARFISH      | <i>Acanthaster planci</i>         |                           | <b>42.49</b> |
| STONYCORAL    | <i>Stylophora pistillata</i>      |                           | <b>41.25</b> |
| LINGULA       | <i>Lingula anatina</i>            | Brachiopod                | <b>39.64</b> |
| LIMPET        | <i>Lottia gigantea</i>            |                           | <b>39.55</b> |
| TRICHOPLAX    | <i>Trichoplax sp.</i>             | Placazoa                  | <b>38.78</b> |
| SPONGE        | <i>Amphimedon queenslandica</i>   |                           | <b>35.51</b> |
| SCORPION      | <i>Centruroides sculpturatus</i>  |                           | <b>34.07</b> |
| ROTIFER       | <i>Brachionus plicatilis</i>      |                           | <b>32.79</b> |
| TERMITE       | <i>Cryptotermes secundus</i>      |                           | <b>30.31</b> |
| SALPINGOECA   | <i>Salpingoeca rosetta</i>        | Choanoflagellate          | <b>30.18</b> |
| SHRIMP        | <i>Penaeus vannamei</i>           |                           | <b>29.76</b> |
| GLOMUS        | <i>Glomus cerebriforme</i>        | Fungus                    | <b>28.88</b> |
| HETEROSTELIUM | <i>Heterostelium album PN500</i>  | Amoeba                    | <b>27.87</b> |
| MOSS          | <i>Physcomitrella patens</i>      | Simple plant              | <b>27.39</b> |
| TRICHINELLA   | <i>Trichinella pseudospiralis</i> | Roundworm                 | <b>27.05</b> |
| FLATWORM      | <i>Macrostomum lignano</i>        | Platyhelminth             | <b>26.63</b> |
| STYLONCHIA    | <i>Stylonychia lemnae</i>         | Ciliate                   | <b>23.79</b> |
| APHANOMYCESe  | <i>Aphanomyces euteiches</i>      | Oomycete                  | <b>23.19</b> |

# Supplementary Figure 4: CLUSTAL All phyla small

CLUSTAL O(1.2.4) multiple sequence alignment

|               |                                                                    |            |
|---------------|--------------------------------------------------------------------|------------|
| APHANOMYCESE  | ----MNDKSNRFKELDRALHQLYNIASS-KD-----VEVDKDTI                       | 34         |
| FLATWORM      | -----MSS-----DDIRFV---IDKFLKD-----PELKES                           | 22         |
| STYLONCHIA    | -----MEQIDELLRQLHKFLFA-----DS                                      | 20         |
| TRICHINELLA   | -----MAYSTVDRIRDALNSLKDFIEG-----ADSDQA                             | 28         |
| HETEROSTELIUM | MFKMNMNVDISIYQRIDGYLVKHLQSVGGTTSTTATTATAAITSASGGNSNNFSAIDKD        | 60         |
| GLOMUS        | ----MSGL----DTLQKCLQELANCRQNIQV-----KSSFGEAVGEA                    | 34         |
| MOSS          | -----MDKQLGSCLASLRDAAD--SV-----RSSGGFVDL                           | 28         |
| TERMITE       | -----MMG-----SELIGFVEVINSCISG-----NHLNKYIEA                        | 28         |
| SALPINGOECA   | ----MAAAR--SELERLCRNLEEQRLS-----ASPRRFIAA                          | 30         |
| ROTIFER       | -----MNDLEKHIQNLPDLSL-----NSNVDA                                   | 23         |
| SHRIMP        | ----MAGGGREEELDLLGKLGQSFPGP-----NGQGDPA                            | 32         |
| SCORPION      | -----MNEITNSLHENILKLNDFIKYQKD-----EGHS----S                        | 29         |
| SPONGE        | -----MESRIESLWESLHSSSP-----QR-YSYA                                 | 23         |
| <b>HUMAN</b>  | <b>----MAGSG--AGVRCSLRLRQETLSA-A-----DRCGAALAG</b>                 | <b>31</b>  |
| ESHARK        | ----MAGPRGAAADTLSAFASKLHLLSL-S-----DVKSAAES                        | 34         |
| LIMPET        | ----MAS-----GLLEESLRDLHANLKD-----GGQSELDQI                         | 28         |
| LINGULA       | ----MA-----GNLQDLLCTLHSCVGGEEE-----DARGGR-KT                       | 29         |
| TRICHOPLAX    | ----MA-----SNLSQLLIDLHALL-N-LQ-----SLHRGS-NA                       | 27         |
| STONYCORAL    | ----MS-----DLLNRYLTHLHS-LPS-LD-----APHCGL-DA                       | 27         |
| STARFISH      | ----MAT-----ADLPVKLSENLGLIST-KS-----GLHVAE-KA                      | 29         |
| LANCELET      | ----MAGS-----GSLEARLSELHALLAE-SD-----HGHGAV-EA                     | 30         |
| :             |                                                                    |            |
| APHANOMYCESE  | ESAVTTLFRRATRNLSLESRAAAEKCCSRLFHGS-SGPTPSLLDILQLQDTGLRKYATLL       | 93         |
| FLATWORM      | KALFNVIFNEF--ASSNENFKHNKYLAIFDEP-EGLVYRLQSKE---VSE--DA----         | 69         |
| STYLONCHIA    | EQVVNELRIYI-LDESLKEADLAFISSKIFNSN-SLLEFLRENSLHNDKLISV----          | 73         |
| TRICHINELLA   | EDCVQQIFNHF-HKLNSEFNFGFCFNSLLSNDNSLLSILSSSIGKTAFAQT-----           | 80         |
| HETEROSTELIUM | GMLIEQLSNVV--LKELAEDIQVAASLFLHGD-HNLLKFLERSVLINTKDMIKL----         | 112        |
| GLOMUS        | LRYSDQIDHIV--SNDIEDQELGLATQLLFDPO-IGIIFLNDTSRVTDVSLAKA----         | 86         |
| MOSS          | APYVVDFSEL--KDLYSDEDISYAIIVFDED-TGIFSILESLLRVRDKSVVRA----          | 80         |
| TERMITE       | KSNISNIISYF--EDKRKRDTLDGAFVLFDDK-TGILQFIQKALKQDAFTEA-----          | 78         |
| SALPINGOECA   | AAIVADIAAYT--RTLTTPELALAASILGSD-QGVLDFLRQ-LGLELYEEC-----           | 79         |
| ROTIFER       | KSIVLDIVYLC--GENLNPQTITFCLSLFFKRE-KNLLTFLRKTITRDEFRC-----          | 73         |
| SHRIMP        | KDVIVDIAELL--AVDLTPAQYDLYISQVL-GE-KGIITFGRSVSKDQSFVEA-----         | 81         |
| SCORPION      | IYVIKDISEIC-LRGTLEKDRSYVCSLILRKE-DGFLHFLEEAVNTPSLKDS-----          | 80         |
| SPONGE        | TEVASDLYSLC--VEQITESELAYSSSVLFNPD-NGILKFLHDVTTLEEFASC-----         | 73         |
| <b>HUMAN</b>  | <b>HQLIRGLGQEC--VLSSSPAVLALQTSLVFSRD-FGLLVFVRKSLNSIEFREC-----</b>  | <b>81</b>  |
| ESHARK        | HSAVGSISRDF-RCSSSDSQLALQSSMVFSD-TGLLVFLRKLRFEEFRDS-----            | 85         |
| LIMPET        | DSIVPTLSQIC--LHEITEKDIDYCSSVLFDE-IGVTTFLQKISKKNEYQGSNA----         | 80         |
| LINGULA       | FDLVRDIANLC--LKETSRETDYCSSLFLNFKD-TGLVSVFVKKVVKQAEYDST-----        | 79         |
| TRICHOPLAX    | CDIASDITVLC--LQTASDAEKAYCSSALFGQD-YGVVTFLRKSIIGLDDLDKC-----        | 77         |
| STONYCORAL    | SNTVVDLGSFC--LENVSSEQAYSSLLFSGE-TSIVSFLRKVITLDEFQDA-----           | 77         |
| STARFISH      | QDLVVDLGHLC--LRQLESENLAYCCSOLFNDK-NGILVFLNKAIKDELKGS-----          | 79         |
| LANCELET      | HNLVADIAQIC--LRHTAERDVAYCCSVLFQES-TGITAFLRKTVTLDQYLP-----          | 80         |
| : . :         |                                                                    |            |
| APHANOMYCESE  | AFTLEHLVTFKDMHDTI-RQSLASHVETLVPTCCNVLTSSQMASKRSEAGYLVKYSVK         | 152        |
| FLATWORM      | ---KKGDLDFLTKLIAQSPALLATS-LPKVKCLAESLFPSSISSAKVRIASLNCISICFK       | 125        |
| STYLONCHIA    | ---KKKVYELIIDYLLKLR-SQEATPYLKLKLDL-CLRSFRSDHNSLVKESLQLLIKIE        | 128        |
| TRICHINELLA   | ---IVYGIDIIRLAIKAT-TSLSPSHRKAIMRF-TLRLKQDYLKGRREV----VLYLAN        | 131        |
| HETEROSTELIUM | ---KTSILNLSKLIKSF-KLQVADYVVPKSI-CISLFRDQSPVQAATFEPQKILH            | 167        |
| GLOMUS        | ---KIALLEFLFLYIRKI-QSDIEPYTEIKNV-HFGILNVDDAEFVKAASFPMAMLD          | 141        |
| MOSS          | ---RESCWSFLALFIKKI-GPRALHYAALLKEK-SLTFFRREDSKSVQAAALTPILIVLE       | 135        |
| TERMITE       | ---IKESFTLLKQLIDVF-KERMSCHVVQIKDL-CKTCILLEKKAEEKDKAFDVIQSVLE       | 133        |
| SALPINGOECA   | ---KVAALEFLAGFIQRLPADRLTPYAVRIKDT-CLTFC-RDKRAKVKSLSFKPLIALFS       | 134        |
| ROTIFER       | ---KVDLLQFLKFIKITS-A-EKKILPSPDIKDT-CILLFSSDKYSVDRCATFISIKILE       | 128        |
| SHRIMP        | ---KKSTLDVLTLLDKE-AQKINRYVDDIRKY-TLYLYNVEKSTKVQAAALEVFTLLA         | 136        |
| SCORPION      | ---LIEALQFLNLFINI-GNKVVQYGITVKDV-VFSIFLRNQLAKVKILALSALIKVLE        | 135        |
| SPONGE        | ---KEELLKLSNFVKNL-SRRVLSHIVPITDV-CVFIEMREKSAKVNATLNLINTLE          | 128        |
| <b>HUMAN</b>  | <b>---REEILKFLCIFLEKM-GQKIAPYSVEIKNT-CTSVYTKDRAAKKIPALDILLIKLQ</b> | <b>136</b> |
| ESHARK        | ---REDVLLKLSVVERI-GEAVGRYACIKGT-CVVVYTKKAAKKAALDILLITLLH           | 140        |
| LIMPET        | ---KYGLLELSDFIHKV-GKKALPYLVEIKEA-SLSNYMTRDPTKIKSSALPVLIKVLE        | 135        |
| LINGULA       | ---KTAILETLCLFMERA-EKKVLPYAVDIKDV-CITLFIREEKAAVKVVIPVLIKLE         | 134        |
| TRICHOPLAX    | ---KEDLLKLTAYMEKI-GGKISPYAVQIKDV-CISLFTDRKAAARVNATFPPLQLLS         | 132        |
| STONYCORAL    | ---KIELLFLQSYVMKM-GKKINPYVVEIKDI-CLKIFSQDHSNKAKAETLPLMAEILD        | 132        |
| STARFISH      | ---KEQLLEFLHAFLLKA-GSRLARTVEIKKI-CISAFMRDKSAKVKTKTFPVLIELLQ        | 134        |
| LANCELET      | ---KVETLSFLAFLEKI-GRKIQHAVVKEV-CMAVFSRDRLSRVKATFPVLKVLQ            | 135        |
| : . :         |                                                                    |            |

Supplementary Figure 4: CLUSTAL All phyla small

|               |                                                                      |            |
|---------------|----------------------------------------------------------------------|------------|
| APHANOMYCESE  | HYA-----PPSASFQLPRLIGRLLDELKS---SKTQTQVKGVILELLGALLQKYPQ             | 200        |
| FLATWORM      | HAV-----GS-SVDGNQLNVGQLCERLRLEVGQ---RQTSEGVTOGLYRALGSIICKHYPE        | 176        |
| STYLOMCHIA    | TFN-----SK--EIEEMIRPNDMMVLLDEIK---LRKPSATVKGTIWTLIGLLHEKYEQ          | 178        |
| TRICHINELLA   | ECIKYSSVSTSEELNFCYDELHLCCLALIDSL--KKLQNGVKKGLFIIIGSLCQEIPE           | 189        |
| HETEROSTELIUM | MKL-----TD-NINPEVFGVREMSDLLLQFT---CGKLTQTVKAELLETVGLFTEYFTG          | 218        |
| GLOMUS        | SSK-----RI--IDPEKLNVRDIISRYLEIFFVVRTKGTSGVKAKAGALDMLGIIAHRFPE        | 194        |
| MOSS          | LNM-----AR--LKPAMFVVDQELSTLLMFEFRK--AKTNSTLKNANIIQLGLDLIEYFRE        | 186        |
| TERMITE       | NG-----PWNDNLNVDELFDKLNPFKSNKSNMTPAKVVQKHLHLGLIIVHKYPE               | 183        |
| SALPINGOECA   | HEQLFTDENR-GQLLRELKADLLKKYLDPFHSS--ASKLTQTVKRDMHLAIGLIIISLSPA        | 192        |
| ROTIFER       | LTk-----GE-YEITAKMNIKPLADDYFLSLANQ--SKLSSSIKANILSILGRICWYHPE         | 180        |
| SHRIMP        | CCG-----SH--IDIQEIINVDFIERLCIDIR---SARGSTVLQHQLQTLGMLMYSYPQ          | 185        |
| SCORPION      | LCS-----GA--ISSEQFNLOKIVNKIIEYLAQA--SSKITPTVKQAYYLLGIISSRHPD         | 187        |
| SPONGE        | LCG-----KT--EYSHDLIPKIIADKFFQAALLP--TKHSATIRGGIYHLLGLVCEWFP          | 179        |
| <b>HUMAN</b>  | <b>TFR-----SS--RLMDEFKIGELFSKFYGEALK--KKIPDTVLEKVVYELGLLGEVHPS</b>   | <b>187</b> |
| ESHARK        | SKL-----SS--SCLQQFKIGELFNKFGDLSQK--SKFPDTVLEKVVYELGLVLAEVQPT         | 191        |
| LIMPET        | LSV-----GS--NMGEDLKIQKFIKFFMELTKA--SKLTATVKGKIYYMLGVICEIYPE          | 186        |
| LINGULA       | LTE-----GS--QMSEELNMREIELFFMELSRK--TKHQASVKRELYKLGLIFAEVYPE          | 185        |
| TRICHOPLAX    | SKL-----HS--SVVEELAISKLVDKYSACKQP--TKYSSTVKSGMYSLGTTIAEKFFE          | 183        |
| STONYCORAL    | VKL-----ES--SVVEKLDVPKIFDKYFGACIQP--VKHSSTVKYWLFSLLGTIAKVPPE         | 183        |
| STARFISH      | RSA-----SA--QMEADLIPKMIELYFQQLMQP--SKLSQTVKQGIYCLGLVLAIEYVP          | 185        |
| LANCELET      | LTI-----HS--QLGDELRVSDMVDMPFLELTMK--SQTATVKSAGLSLGLVISEVYPD          | 186        |
|               | : *                                                                  |            |
| APHANOMYCESE  | EMDS--SRENI--RSWIEAAL-----DKQF--ASNSPELQIINGSFTECLAEIITANTY          | 247        |
| FLATWORM      | EFQP--VAVKI--SVNVVKS-----VQKI--KSDHTKVQFAVIASLFEFLSNYFCHFSL          | 225        |
| STYLOMCHIA    | LNDFKVESQD---VGFQEL-----VAQM---KSEKPEIKAIIGMLKGFTHSLVGECT            | 224        |
| TRICHINELLA   | KLITADYNYALLFANIMSEEL-----KNQMC--SSIHSPSYSVIEGCFGLNDLLAHFSN          | 242        |
| HETEROSTELIUM | IMFD--KSAQL--ISIFMETL-----GSQL---KSKTPETFLIKSSLLGLNSLNLNFS           | 265        |
| GLOMUS        | YVDF--EKNKI--LRVFLANL-----KEK-----SLTDAAFTEGLYSFLFAYSD               | 233        |
| MOSS          | SFEE--ENVLAI--LKLCLDPTL-----EQQL---QKSPQLVLMAGAIKCLDSLLMWFND         | 233        |
| TERMITE       | CLRP--EETRL--LRIYSEL-----EMQT--SHATAVKYQIIAGCLNGLTEFLYVFP            | 232        |
| SALPINGOECA   | FAAS--SLSTSV--LNVYSEL-----RQMT--GKAPPELPTVEGCFRGLTAYLKTNPV           | 241        |
| ROTIFER       | VISS--KSNKC--LELFLTTL-----KNEIN--AKFRKSDLIAGALDGLNSYLNNSV            | 229        |
| SHRIMP        | NLRH--QSPLI--LKIIFKQL-----VKHTGSKPDLNALAGVLRGLALYLHHPPE              | 231        |
| SCORPION      | CMQL--CSERL--LNWYKDL-----KFHT--TSNQSESSIIVGCLQGLNEFMYPQFL            | 235        |
| SPONGE        | HLVK--ISSRL--IDIYMSNL-----KSEMTVKKTKKPELPIISGCLYGLTAYLNNFSQ          | 229        |
| <b>HUMAN</b>  | <b>EMIN--NAENL--FRAFLGEL-----KTQMT--SAVREPKLPVLAGCLKGLSSLLCNFTK</b>  | <b>236</b> |
| ESHARK        | EMLH--NSEKL--FCAYLNEL-----RVQMT--SATREPKFLVVSGLRGLTALMINFTK          | 240        |
| LIMPET        | YMTT--DSTKL--LDIYKSSL-----KSQMM--SKTNKPEMTIISGCLBGLTSLVNVFTQ         | 235        |
| LINGULA       | GMVN--YAERL--TDLCVRTL-----QAEMN--KKTGKPEIPVMTGCEALSSILTNFTQ          | 234        |
| TRICHOPLAX    | YIMP--HAQQL--LTIYLNLT-----KSQMT--GKNTKLDMPVIYGLRGLTSLYLNFTQ          | 232        |
| STONYCORAL    | CVIS--HSDHL--VKHYVSVLKLLENLIPQMT--RKTKKPDMLIAGCLRGLTSLYLNFTQ         | 238        |
| STARFISH      | LMSG--YSERL--LSVYIATL-----NQQMT--SKTRKPELTVIAGCLTGLGHYLVNFTQ         | 234        |
| LANCELET      | LMVQKDHDPRL--LKVYISML-----KEQME--SRTRKPEMLVISGCLBGLTHFLVNVFTQ        | 237        |
|               | * . : : :                                                            |            |
| APHANOMYCESE  | D--EG-----FRDKLFKYMHVTL--ATATSGNLSRLAIVKSCLLLLGRHIQVFSENIVRSD        | 299        |
| FLATWORM      | E---EPD---LKVYHLAVKVI--AGK---NYQRYEAPKQALLLFANHCVPVFAFLADN           | 273        |
| STYLOMCHIA    | L---DQD---QLDALYVCLKTAI--QPIL--DMQHKGVMKSAMKLLGTHINLFKKHVTRH         | 274        |
| TRICHINELLA   | LFDGACR--MSCSELFNLIKAC--NPKN--DVHRLGHLKAALSFLISRQVQFRHHFLDE          | 296        |
| HETEROSTELIUM | DFISGSS--KNVQLLYQYLYICL--DPVS--SSQRFDIPRAAMMVQRHTSLFKQYLTEQ          | 319        |
| GLOMUS        | SIKKENQ---DAYIFKCIIMNSI--TMVE--NDRYYSIVKTGLQYIIDHSNIFGEFFLRE         | 285        |
| MOSS          | SLPAGGS--VENSRRVFTCIEQVL--WPRE--ELKRYEPLKASLRLLSRHAGLFRMLIES         | 288        |
| TERMITE       | KPQEK----EARRIYDCVTAVA--RKH---KEMRVAPRCALGLIQAHGGLAKFLYDE            | 281        |
| SALPINGOECA   | SCDPSARQATPGVQIYNYVKMAI--NPDVTVKMTFRQVPRAAALDLFALHADQFRSMIATD        | 299        |
| ROTIFER       | S---ETSD---HLRAVFNFIKLSLSSSE--DLSRYAVPKSALNLIKHCRCQFDELIYSD          | 281        |
| SHRIMP        | GIDDDPQ---LFTELYKHIIHKVL--NPDL--NLPRRDAQRAALELIHTHGAKFSSQLFED        | 284        |
| SCORPION      | QDTEDE---KAYQLFKFIRIIL--SKR---DVKTYDMAKASLTLSSHASLALQFLYED           | 287        |
| SPONGE        | SASEGSV---YAQDIYKYTRMAI--DPLA--NLTRYEVPRAGLSLISRHAQFREYLVKD          | 282        |
| <b>HUMAN</b>  | <b>SMEEDPQ---TSRETFNFVLKAI--RPQI--DLKRYAVPSAGLRFLFALHASQFSTCLLDN</b> | <b>289</b> |
| ESHARK        | SMEEDPK---ASKDIFDYALKAI--NPQI--DLKRYAVPLAGLRFLTLHSSQFGTCLMDN         | 293        |
| LIMPET        | QSGD--D---SCYDIYKYCKMAL--KQST--TLTRYEVKAGLHLLSKHASQFNEFLIDD          | 286        |
| LINGULA       | SAEAG--K---HSYDIFKCTRMAL--NLE---ETARYDLTRAAALTLKRHASQFSQFIYEN        | 285        |
| TRICHOPLAX    | SVEESK---YAADIKYARLAI--DPKV--ELPRYDLPKAGLNLIAKHAQAFCDYISRE           | 285        |
| STONYCORAL    | SVSEGSK---FAKDIYTYGRMAI--NPQV--SLSRYEVPKAGLYLFAKHSQAQFKEYIAKD        | 291        |
| STARFISH      | SVEEGAK---HSKDIYRFARMAI--DPTV--DHTRYELNKAGLNMFAKHSQAQFGPYLYSD        | 287        |
| LANCELET      | SVEEGSA---HSKDIYNFTRRAV--SPQV--EMARYDVPKAAALWLLAKHAQAQFNEYLMDN       | 290        |
|               | :: : . : :                                                           |            |

Supplementary Figure 4: CLUSTAL All phyla small

|               |                                                            |     |
|---------------|------------------------------------------------------------|-----|
| APHANOMYCESE  | TYQFYSMFLFCCTSSNKKVRKPAFSCLDGAFDIAQGLVCDVA-----QNKHFNF     | 353 |
| FLATWORM      | YEVLFEQFFRWSTHHRDLMLHVGLMAFDVFKVSVSTAATSAAESAATPAQKKLFLF   | 333 |
| STYLOMCHIA    | AIELVALTLKLCVNEHMETRDAANEMLVHIMQEISDGIIDSS-----IHDDIFR     | 328 |
| TRICHINELLA   | YSLNECFSHWAKHYDREIKTYSLNAEDLLIRELATELITKVDS-D-PNHVRSVYKY   | 354 |
| HETEROSTELIUM | SEKFFARLEEWCKHINKKNRDLAFNTIDSFLQQLANELTVGNR--S-IESDQATFKY  | 376 |
| GLOMUS        | YKEIWQCLWKLVRHNRPEVRNAAFKAIWAFKQIAKVLNSATEF-----KEFDCVDY   | 340 |
| MOSS          | GIRNMHWLQEHCTHSNAKIRDAALPAYDQFITHVSSALVSDS---R-IRNAQALYTA  | 344 |
| TERMITE       | YKFWHEFLKWINSAAGE-DHKAGVVALDVFNQVASILKDNTE-----SETGHHVFLY  | 335 |
| SALPINGOECA   | FELLQYLSDSCEHNNKDIKASAFRALEAFLQQSVAHMTKAG---K-SKDTMFMFGT   | 355 |
| ROTIFER       | YKEIFDRISQWSEHKNYDMKKLALYALDSYKSLAEMIRVKSNTET-DKCR-LIFKY   | 339 |
| SHRIMP        | CTQVQWVFKWCGSRNRDDHKAALPAMDTFIVVIANMLELQAM-ED-DKRGVKIFKY   | 342 |
| SCORPION      | SMNIYKIIIEIWTNHSNREVRSLGYNALDAVFKQISDMLEQNY---E-DCKAEIFK   | 343 |
| SPONGE        | SEHMYESLSSWSNHKNKCEKRVAVNAIGSFFREVTQISDPSI--S-RELGISNYK    | 339 |
| HUMAN         | YVSLFEVLLKWCAGHTNVELKKAALSALLESFLKQVSNMVAKNAE-----MHK      | 343 |
| ESHARK        | YRTVFEKMKKSCGHTNSEMKKASYSALESFLKQVAIQVAENAH-----LHKD       | 347 |
| LIMPET        | YEDMYDRLYFWSHHNRDLILHVGCMAMESFLKEVNMSYLSFG-----DSVFF       | 336 |
| LINGULA       | HERLYSVLLAWSQHNNKDVSSLGMEALEAFFKQMAEMLATKAE---E-GHPDRAAF   | 342 |
| TRICHOPLAX    | AEALYEVIRWCRHRNRDIRAAAFHALELIMKQIAEYLVNE---N-DAANINIFK     | 340 |
| STONYCORAL    | YEVMYGDLYRWCKHHNKETSAAAYAAEAFFQQISLYFVGRH---G-DKSDLAMF     | 347 |
| STARFISH      | HQDLHEAFNKWSAHNPAVKAVGFAAQEAFLQQIAEILVERAAK-R-DASDMAVFR    | 345 |
| LANCELET      | YEDMYRKLIEYWSQHPNRDLKQAGYAALESFLKQISDMLVARHEKEN-NKADLAV    | 349 |
|               | . . .                                                      |     |
| APHANOMYCESE  | EFLSCLT-----EK--MSDDKVSIALAGLSFAAIIPVFMGDGALSKIHTRL        | 398 |
| FLATWORM      | QFRQILD-----SD-GSSWKTVSVAVRGGYFAEAACKLLAPPDMRQVYADV        | 379 |
| STYLOMCHIA    | EFETILN-----NETNQTNVLLISTIKAVGIFSKAIKTKSGDDALREYLSKL       | 375 |
| TRICHINELLA   | QFDEIFS-----NT--SGIREISMISKSYGRLFQIGKALYGEVECKVLRKL        | 399 |
| HETEROSTELIUM | KFYSIFE-----NN-NSTPFDISIAIRGCGRFAAPVKAFIGEWELSKLLGSL       | 422 |
| GLOMUS        | IFDDIAGEIKKTSDOQLNKEEQ-DQKTKDISIAVRGGYFACSVKRLDKEERYKPI    | 399 |
| MOSS          | DALDVLN-----AQ-DADPKRISLAIRALGKLAACIVKFSKESLKDAPHRL        | 390 |
| TERMITE       | FFKNKML-----SS-STSSYDMKLVIKAFGLFAAPCRVYMTPODVLVMFTVV       | 381 |
| SALPINGOECA   | RFKAAMG-----EA--ASHRAVAIAIRGYGLAAPCKLLCGVDDLRLMSDDL        | 400 |
| ROTIFER       | KFYKNLT-----DG-NKDLKEMVISIKGYGAFAGPCRELMDTKDMKMLNII        | 385 |
| SHRIMP        | EYNKMLE-----TS-E-STSKLSLAVKGYGLLSGACRQFLSPVEVHTMFSQV       | 387 |
| SCORPION      | KFQLMIK-----CS--ENIRRVSTAIRGGYFAKVCKLYLTEKDVKYMLNDV        | 388 |
| SPONGE        | CFRSLMN-----DP-DINHRLLSIAVKGYGHFAKPCRLYGSMEDLHFMFGEM       | 385 |
| HUMAN         | QFYGIIR-----NV-DSNNKELSAIRGYGLFAGPCKV-INAKDVDFMYVEL        | 388 |
| ESHARK        | QFYDIIR-----TP-ESSMKELSAIRGYGLFAAPCKA-VNSNDVDFMYIEL        | 392 |
| LIMPET        | QFRQIMN-----SS-ESSDKVSLAIKGYGLLAGPCRRFLNVTDVVFMLESEM       | 382 |
| LINGULA       | KFREITD-----NP-HAKQNEIASAVKGYGAFAPCKFHMTAEDVKYMFNEM        | 388 |
| TRICHOPLAX    | QFRSIIID-----SG-SSDAKELAIIRGYGFAAPCKTLLKDDVRFMTMDL         | 386 |
| STONYCORAL    | TFRRIID-----SV-LSDTRQMAIAVRGYGYFSKPKCLFMQADDVRFMFSEI       | 393 |
| STARFISH      | RFRDIID-----NP-QSDTRALSSAVRGGYFAAPCKLFMTDDDVKFMFTESEM      | 391 |
| LANCELET      | EFRTIID-----TT-EAGTREMSIAVRGYGFAAPCKMFLSESDVKFMFSEM        | 395 |
|               | . * :                                                      |     |
| APHANOMYCESE  | VKYGEDVMMAMREMK-----FKWMLLCRFTTCYGHFVRNMQSNEA-AVENF        | 443 |
| FLATWORM      | VQRAEDLFTAESDSS-----DERLSNLPFVSELSNLALHLDLDELGT-VFLSL      | 425 |
| STYLOMCHIA    | TTLNQNKIIKEFEQQEDPKNDYKNFKQILKKQQLLSFIESYSFIIQNLDSEPSDEV   | 435 |
| TRICHINELLA   | LQRFYLYSTTSSDAQ-----QQNVYHITNILEAASRGLLCLSKIAD-DVWQL       | 445 |
| HETEROSTELIUM | FKFSEKLMVVKLENI-----DEIVMHLSSFINAFSNILFEIKDIEY-WYMEH       | 468 |
| GLOMUS        | LNPNSNWAISNLNEIE-----ITHALSQIPLYIEAYCFIGREYDEIFQ-QLMET     | 446 |
| MOSS          | EPFGSLRSL--GDGR-----EGSLGYAVTLVGAFAADMVIHLDDVED-LMVTF      | 434 |
| TERMITE       | MQRABEQIYFKEGDIS-----NADLQNLDPYIESLSSIMRQLSAVTN-EQLVA      | 427 |
| SALPINGOECA   | ARRCQQLYFHMGGDE-----QEESAHLASYIDAIARLIQQLEESGD-VFLPI       | 447 |
| ROTIFER       | IDICDRNFLSADSQA-----HNEIYDEKIFQLSSFIESLSCVCSQIDSFSE-GSLNT  | 436 |
| SHRIMP        | LTASQHFYQSGDML-----ENKLTNLPYSIESLAIISNMDDVNS-GILEN         | 433 |
| SCORPION      | IKKSEQHCLNEEKIL-----DERIQILPSFLDSLSSIVLQLOEISE-SSLNY       | 434 |
| SPONGE        | VQRSEQLFLASVDFTTS-----SSSVAFEEFLLPTFIEALANISKEIQNLDP-VCLSS | 438 |
| HUMAN         | IQRCKQMLTQTDTG-----DDRVMQPSFLQSVASVLLYLDTVPE-VYTPV         | 434 |
| ESHARK        | IQRCKQMYLTEADTE-----DDNVYQLPSFLDSIASVIFHLDKIPG-VYTPV       | 438 |
| LIMPET        | LNKCEQQFLKLVGEN-----QDKMYGLHSYLDIAIANIKEIDELSE-TYASI       | 428 |
| LINGULA       | MQRSEQIFFSKNELK-----VDNVYNLPFSIESLARIVEQMEVSD-TFLVS        | 434 |
| TRICHOPLAX    | LQRSEQLFFI--DVN-----VDKIYLPSPLEAFASILNILDDEVND-TFTRS       | 430 |
| STONYCORAL    | MQRSEQFYLSQSDLS-----EDRAQHLPTFLEALSSIEELDKISD-SVLAC        | 439 |
| STARFISH      | IQRSEQLYLQQGEVS-----DDKLNQLPNFLEALASIMRQLDVLSD-SFQAA       | 437 |
| LANCELET      | MQRSEQLYFGTADSM-----EDKVHHLPSFLEALASIVQHLQQLSD-MFVTS       | 441 |

Supplementary Figure 4: CLUSTAL All phyla small

|               |                                                                   |            |
|---------------|-------------------------------------------------------------------|------------|
| APHANOMYCESE  | AVTLACRILEAYPSSAIYVKYQAEISLVSIFQALPTG-----NAIDRVIRHGILLTVST       | 497        |
| FLATWORM      | LARLSVTVCHMYPRVSRMGRVGLRAVAHALHRLRSRRPGLAKAFAAQVYVQSLVRTCSH       | 485        |
| STYLONCHIA    | FLKVCIEIGVRHHRKLYQKYRDRFYEALASFTKALSKH-QKAFANWIKQFVDLSLIQTLKI     | 494        |
| TRICHINELLA   | VERFHVTLFHNFPLEMKRFYHRCKVINAVTFAAAYGH----NYQYIQSIVFQSLIRVIAS      | 501        |
| HETEROSTELIUM | LEQAVATYFIIFPYLFTVQRERYSAVNRLLSSLYHR-PEFLKTLGRIVRQGLLITFSK        | 527        |
| GLOMUS        | IEHEVGLMMIYFPRMVYDLRLRCVNAFEHLLWMLYLKGRGTMEKRFVSKSFYQTLILTCS      | 506        |
| MOSS          | IAQVTGSIFFLYPQLFAKQKQAVYTALRNLLKALYPK-GPVYFFLRNIVWSSLQRAME-       | 492        |
| TERMITE       | LQCLTVQLIENFPKLPKPFHWLAIRAITVTLSSLAESGGTFLEEFLSNVVYQGIIRSKH       | 487        |
| SALPINGOECA   | LERLIVLLEAYPSMYRTQRASVHLSLTRCFVSLYHK-GSTLQTFFAKVANHVFLSACSQ       | 506        |
| ROTIFER       | MEKLVILAIIDCYPKLVKRYNNQISLAIAALFLAIQR--TNFSDEFISRIIYHSLIRIFSY     | 494        |
| SHRIMP        | VQQLSSALVEHFPVLSVSPKRFVLAIRALFRLLFTVYNK-PGYFHEFLHTFVYKAIIVLSCSH   | 492        |
| SCORPION      | LEKLAVFQIQNFPYLPSPYHFLCYNLSIKFLAVHVK-GPQFKGFLNKIIYQGIIRTC         | 493        |
| SPONGE        | LQKLSVLLFHCYFPLSSHVRYQGSVSLKLIMAVSSI-PTSFKQFLSHIVYQGVIRSCS        | 497        |
| <b>HUMAN</b>  | <b>LEHLVVMQIDSFPQYSPKMQLVCCRAIVKFLALAAK-GPVLNRCISTVVHQGLIRICS</b> | <b>493</b> |
| ESHARK        | LERLLVVQIDSFPLYARMQPICCRSIVKVFVALAGK-GPVLWNFISTVVHQGLIRVCSK       | 497        |
| LIMPET        | VEHLLVMQIQNMPMLNEKMHFMATKSVIHVLLALMCK-GSVFNQVLSGVVYQSVIRTCSH      | 487        |
| LINGULA       | LEKLVVCLTEHFPSLYKRRKLDVQVSLGIFHALISK-GPTLRIFLGRVYVQGLIRTC         | 493        |
| TRICHOPLAX    | LEKLTIVLFENFPYVINELHSLCYKSLFELLALHLSK-GAALKNFLSRVYVQGLIRTC        | 489        |
| STONYCORAL    | MERIVRVLPDKFALNKGKFLCCKALIRVFLHLSK-GAILRNFLSEIVYQGLIRTC           | 498        |
| STARFISH      | LERLVVVQVSSYPRVFNKYQLSHQAILLVLIALLSSK-GATLKNFLSRVYVQALVQTC        | 496        |
| LANCELET      | LERLVVVLFFENFRLGKMKMLICQKAILKVLVLLVLPK-GATLRTFLSRIVYQALVIRTC      | 500        |
| .             |                                                                   |            |
| APHANOMYCESE  | QLNPSQEETLYH-----PDTGLPEPRLLFEYEILLWRNLLKRLKDKQK---               | 538        |
| FLATWORM      | EHVPYQSDTEAGSSPGSASDSAADPVQGDASNSVRKISYKDYLRLLWCLFSLKEK           | 542        |
| STYLONCHIA    | PDAVLFG-----GESPYESLQDAVQFWREWLNKDKIWS---                         | 527        |
| TRICHINELLA   | LPSVGK-----ESIVLAKDENTFHLADYLPFWKMLLDSEFVDL---                    | 539        |
| HETEROSTELIUM | PHEALLPH-----LNTGDPWPYEVYKEVWYHLLHPKPSDISRG---                    | 565        |
| GLOMUS        | AIQIQNRSDLQNA-----NSKDMIDVVAEHTYQEMFFWENIFKDSLWS---               | 551        |
| MOSS          | PVDE-----ALEEGSVQLWRHYVELWSHLIDFSSDQG---                          | 524        |
| TERMITE       | QIAIDVELQKGQ-----FHENVFTYKDYIPLWKELLSVNNFQK---                    | 525        |
| SALPINGOECA   | SIRDTEDMAEDA-----VAQSYLALLRQLLKGSGLVK---                          | 538        |
| ROTIFER       | KTLYSVNQEDTSD-----ETNEPMSSIVTTSLDYVMLWSNFGLEQFSD---               | 539        |
| SHRIMP        | APEVSSPGEQGSW--RGKAG--GGEWVKGLKNEVVTFSYIPLWTALMVPEKVAN---         | 545        |
| SCORPION      | PVRFIEIAREENMS-----GDNLELKNPREITSKSYSLWENLLYIVRNKE---             | 539        |
| SPONGE        | PVVIEAVQGDSDAVV-----TAAPLADSNKVMYSLDYVQLWIQLIDYKLLKG---           | 545        |
| <b>HUMAN</b>  | <b>PVQLPKGPESESE-----DHR--ASGEVRTGKWKVPTYKDYVDLFRHLLSSDQMD---</b> | <b>542</b> |
| ESHARK        | PVLLPGEGTGRSESG--LQQQS--ASEVMWTGKWRVPSYKDYLDLFRSLNCGMKME---       | 550        |
| LIMPET        | PIVLETEQTDDDTLY-----NVDVEKQISYKSYLNIWNLLMDSPEIKV---               | 531        |
| LINGULA       | PVATDLGEVEAE-----VDMEMQMESEKKITYKDHLDFWNMLLGGSSHLKV---            | 538        |
| TRICHOPLAX    | PVYVETSDSLNI-----SQDSVILETGPRISSYKDYISLWKNLIQATEIKG---            | 534        |
| STONYCORAL    | PVILKEVNGESTIMEER-----EVYEGSTPNTSLKDYLELWWEYLLDKDKLKD---          | 545        |
| STARFISH      | PVVLGDGSPSIDH--PVLGNDQ--DTEADILADARHITYKDYVKLWASLLDSTHVKE---      | 549        |
| LANCELET      | PNVIEGVTAEDDELPAVSGEG--GEQQPQPPVKRFSYRDYLELWGNLLDSSRLKE---        | 555        |
| .             |                                                                   |            |
| APHANOMYCESE  | -----NHGKIIDVFMKSILEVFE                                           | 556        |
| FLATWORM      | -----LCDYV-----GMSAA-----EARSISGGIFDAFLSSVLAIE                    | 574        |
| STYLONCHIA    | -----EYTCQYVYGELIQRVIRIIS                                         | 547        |
| TRICHINELLA   | -----SEFG-----FDRA-----MQVNIQRTLDFCFMKSFLIIVR                     | 569        |
| HETEROSTELIUM | IQMEVEQHVVQVQKQEEGEKEKEKED--SISIS--TSEDIQLLYNEIVQTMITFIR          | 619        |
| GLOMUS        | -----IIDQSGFL-----IDENRLNTIQLEFFSILYDEFISSVFKMIR                  | 589        |
| MOSS          | -----LQLEAGLDEAESFEELVTSDVGNVGIIESSLRESIYDAIMHCYIKVMN             | 572        |
| TERMITE       | -----RST-----SLT-----QTQLIVVKVYDKLVNTVVLVLMK                      | 553        |
| SALPINGOECA   | -----IPDEE-----MTHE-----DRNAMLRTLYDETLLKAFLLHIN                   | 569        |
| ROTIFER       | -----LKSDN-----LD-----DKKKIVEIIFNEYIESIIKIMN                      | 568        |
| SHRIMP        | -----IKVSG-----MPAT-----VMTEMSNFYSEFISCIIEISE                     | 576        |
| SCORPION      | -----LNHIG-----ISLE-----DRHNLQLIYDEIISVVLTLLK                     | 570        |
| SPONGE        | -----MGM-D-----FDLE-----LRQSIHQLVYSEFIQSLNLIR                     | 575        |
| <b>HUMAN</b>  | <b>-----SILAD-----EAFFSVNSSESLENLHLLYDEFVKSVLKIVE</b>             | <b>577</b> |
| ESHARK        | -----FGLVD-----TLQMINLPLQSLNRLLYDEFIKSILKIE                       | 584        |
| LIMPET        | -----VLFES-----FALF-----ILTQLTDALYNELMNSVIKVLN                    | 562        |
| LINGULA       | -----HSKLT-----PD-----EKSALTQAIYDELVRSTLKIIS                      | 567        |
| TRICHOPLAX    | -----LTLIT-----TDRE-----HIIVYQRSLYNELLHSLQRIIL                    | 565        |
| STONYCORAL    | -----ESLLG-----KQLE-----ERKVMHGLVYDEMIRGILRIIH                    | 576        |
| STARFISH      | -----VQAMG-----MNYA-----DRRKIHIILYDELIFSILKIIS                    | 580        |
| LANCELET      | -----LSQWG-----VAVA-----DRQAMHRMLYDELVTSVLKVID                    | 586        |
| . . .         |                                                                   |            |

Supplementary Figure 4: CLUSTAL All phyla small

|               |                                                                                                                                                                                                |            |
|---------------|------------------------------------------------------------------------------------------------------------------------------------------------------------------------------------------------|------------|
| APHANOMYCESE  | RLDLRYKQKENKTE---ED-----                                                                                                                                                                       | 572        |
| FLATWORM      | RLDLSACRLSDLEPPVTAASEA-----SSS-----SATTDEDSAAPI                                                                                                                                                | 611        |
| STYLONCHIA    | DLNLTYYKVEKGRNNKDGNOQE-----SNNNNNGRDPQILNQEL-----TGLH                                                                                                                                          | 590        |
| TRICHINELLA   | L <del>LS</del> FPETKAFQDVEE-----Y-----TFRF                                                                                                                                                    | 588        |
| HETEROSTELIUM | KLDLSYSTKEEEEEQEKEKELKKQVVKDKDKGGEEEEEEEQQEEDVTMEDQQQDGLF                                                                                                                                      | 679        |
| GLOMUS        | TLNLA <del>V</del> TEASDVSL-----GTSITKNN <del>D</del> HEVDA-NLI-----AIAG                                                                                                                       | 624        |
| MOSS          | ELN <del>L</del> KYRVKPARTGKYSEE-----L-----DAGP                                                                                                                                                | 596        |
| TERMITE       | KLDLSTRKKTNIEAL---STSG-----G-----ASEA-----DIPV                                                                                                                                                 | 581        |
| SALPINGOECA   | KLNL <del>T</del> THSSSDAE---DEDVAV-----ATSGVK-----EEEPHE-----VDDV                                                                                                                             | 604        |
| ROTIFER       | KLDLAAVKN <del>D</del> GSEVN-----GGEQ---ENVDKNQSD-----LGVS                                                                                                                                     | 600        |
| SHRIMP        | KLDL <del>T</del> TYKQNELQ---QEEVS-----G-----SDEG-----DPAT                                                                                                                                     | 604        |
| SCORPION      | KLDL <del>A</del> TTHSMQDSEIKDSNLK-----G-----QFETSEL-----YSTV                                                                                                                                  | 602        |
| SPONGE        | KL <del>D</del> FTTASTTEDGIMANE <del>G</del> EGG-----GGSGGG-----D-----PVIT                                                                                                                     | 608        |
| <b>HUMAN</b>  | <b>KLDL<del>T</del>LEIQTVGE---QENG<del>D</del>-----EAPGVW-----MIPT</b>                                                                                                                         | <b>605</b> |
| ESHARK        | KLDL <del>S</del> VEKQ <del>N</del> QRE---EEGSG-----DVSNGN-----VIPT                                                                                                                            | 612        |
| LIMPET        | KLDL <del>T</del> STTSTELT---EQMDEA-----STSGGD-----VTMET-----DDVS                                                                                                                              | 596        |
| LINGULA       | KLDL <del>T</del> SVRGS <del>E</del> DT---DQGDSA-----GTADKG---RP---VTP-----FLAS                                                                                                                | 601        |
| TRICHOPLAX    | KLDL <del>T</del> SSQQTIE---EETQ-----S-----SEGT                                                                                                                                                | 587        |
| STONYCORAL    | KLDL <del>S</del> SSK <del>G</del> SSAQ---EGDILG-----KSSASD---VPASATADK-----EVSL                                                                                                               | 614        |
| STARFISH      | KLDL <del>T</del> TSNKDTTEL---QDQVA-----VD-SDST-----EDAS                                                                                                                                       | 608        |
| LANCELET      | KLDL <del>T</del> TSKQVETG---NEELT-----ADVSGSQ-----DGT                                                                                                                                         | 615        |
|               | *.:                                                                                                                                                                                            |            |
| APHANOMYCESE  | ---ASEFEPLIS---RDQ <del>T</del> IALN <del>L</del> TEFCERWLPSVQSS-IQPWIPFLKWI <del>F</del> SRSRESPL                                                                                             | 625        |
| FLATWORM      | TD <del>T</del> LQGMVASTP---KDIVIFVNLV <del>D</del> FVEELLQHHRAGPIAKWFYPLCQALI <del>E</del> KSAENPL                                                                                            | 668        |
| STYLONCHIA    | QDYIVQYIANN---TDQ <del>Q</del> FLVRLSNFAEMFLLQCKDQWFLKWI <del>P</del> QFTDTL <del>I</del> KKASQTPR                                                                                             | 647        |
| TRICHINELLA   | GNPVFNVIPTKQ---ADYDLFYNLVE <del>L</del> CRSVIMNGSHVLFEPWLQ <del>P</del> M <del>L</del> TMLLE <del>S</del> SRYPM                                                                                | 645        |
| HETEROSTELIUM | NIGEDTLK <del>P</del> STP---KDI <del>E</del> FLN <del>L</del> VEFSK <del>L</del> FLARQHTN <del>L</del> LTRWIYIFGKEI <del>I</del> FGSRKYPL                                                      | 736        |
| GLOMUS        | SGDLET <del>L</del> QPLVS---KDFVLFQNLV <del>D</del> FWQLFLPRIKSELFSRWVYLAGDTLIT <del>F</del> STRYPY                                                                                            | 681        |
| MOSS          | IEPEAEMDLIEPLDMI <del>H</del> MRKYLN <del>L</del> VDFVQELLSGPCSS <del>L</del> ILKWTY <del>P</del> FGRCI <del>I</del> E <del>L</del> SNRYPL                                                     | 656        |
| TERMITE       | LDPE <del>S</del> GLEANNR---KDFQVFINLVDL <del>T</del> RDV <del>L</del> MSVDCS <del>Q</del> FEKWI <del>Q</del> PPFYKVI <del>S</del> ESSNKPL                                                     | 638        |
| SALPINGOECA   | SDPT <del>T</del> SLIASRP---KDIQVLIHLV <del>T</del> FGQDLFSTR <del>T</del> DLFPRWLHIYSDI <del>V</del> TRSSKYPL                                                                                 | 661        |
| ROTIFER       | SDPIIGLKPQK---RDFE <del>I</del> FINLVD <del>F</del> TRELLMKN <del>N</del> FDLFEKWL <del>F</del> KLSKEI <del>L</del> LSTSHCL                                                                    | 657        |
| SHRIMP        | SDPV <del>S</del> GLKAKVP---KDFQVYMN <del>V</del> S <del>L</del> LEKVLPLQ <del>S</del> EDQLEPHI <del>P</del> RLVWF <del>F</del> V <del>T</del> QSS <del>L</del> QPL                            | 661        |
| SCORPION      | SDP <del>F</del> YGLQ <del>L</del> SKP---KDFR <del>V</del> FMNI <del>V</del> DFC <del>K</del> DLFIS <del>K</del> HNELFEK <del>W</del> ILIFGL <del>E</del> IIQ <del>F</del> INKN <del>P</del> Y | 659        |
| SPONGE        | SDPV <del>L</del> GRQPAVP---KDFQIFINLVE <del>L</del> LAKKVI <del>P</del> SVLSL <del>F</del> TPWIL <del>T</del> FSQ <del>E</del> VVSLATRYPL                                                     | 665        |
| <b>HUMAN</b>  | <b>SDPAANLHPAKP---KDFSAFINLVEFCREILPEKQAEFFEPWVYSFSYELILQSTRLPL</b>                                                                                                                            | <b>662</b> |
| ESHARK        | SDPAADLQPVKP---KDFAFVNLVQ <del>F</del> STELLERHEEF <del>F</del> DQWVYRFGYELILRSTQFPL                                                                                                           | 669        |
| LIMPET        | ADPT <del>S</del> SVHASKP---KDFQVFINLVD <del>F</del> CRELLPNKHINL <del>F</del> ENWIF <del>T</del> FSHN <del>I</del> L <del>L</del> STQ <del>N</del> PL                                         | 653        |
| LINGULA       | SDPV <del>S</del> GLQASKP---KDFQVFINLVD <del>F</del> SRDLHTDQYCALFKRWV <del>T</del> FGHLIVMSTKYPL                                                                                              | 658        |
| TRICHOPLAX    | SNPVAGLKNVP---KDFQVFINI <del>V</del> DF <del>T</del> KALLP <del>T</del> TRTE <del>F</del> FLPWIF <del>P</del> FGKNLVLLSTRLPL                                                                   | 644        |
| STONYCORAL    | SDPV <del>P</del> GLQPKVP---KDFLIFIS <del>L</del> IEFCRCVLPNYCV <del>T</del> FERW <del>I</del> YMFC <del>R</del> DI <del>I</del> MSSR <del>F</del> PV                                          | 671        |
| STARFISH      | SDPLHGLHATKP---KDFQIFVNLV <del>D</del> FCRDLLPANQPALFKQWVYRFGHEVILLSCRLPL                                                                                                                      | 665        |
| LANCELET      | SDPFAGLQAAPK---RDFVVFINVVD <del>F</del> CRDLLPHHHP <del>E</del> Y <del>F</del> QRWVFTVGHALILHSTRLPL                                                                                            | 672        |
|               | . : :                                                                                                                                                                                          |            |
| APHANOMYCESE  | VSVLYRLATVVSRI <del>L</del> AIE---VSI-----                                                                                                                                                     | 646        |
| FLATWORM      | ISGFYKLLATFVTRARDAGYFNDQ <del>P</del> V <del>P</del> V <del>V</del> MEIAD <del>T</del> NTMESDNQDSQT---DNDEEGQSVV                                                                               | 725        |
| STYLONCHIA    | ISKLYQLLKVCMQICS <del>N</del> HRYFEVSD <del>D</del> IDS <del>V</del> -----A                                                                                                                    | 678        |
| TRICHINELLA   | VSGFYKLLAVVVTMAEKLNYFN <del>T</del> EQDKTENC-----                                                                                                                                              | 677        |
| HETEROSTELIUM | ISGFYKLLHVLLKVAKKVNYFG <del>F</del> IDG <del>S</del> NKSSLDANGGEDDSMEIDSGK----SSIPAD                                                                                                           | 791        |
| GLOMUS        | VSGFYKMLG <del>S</del> CLTVCESIKFFDGIKNVDNE-----NIMI <del>Q</del> DSQD---QLSTA                                                                                                                 | 725        |
| MOSS          | ISGFYKLLTVNITIANREGFLSVAGEDSLDAD---GG---YMNLDKKRDSTTFAGTTGV                                                                                                                                    | 709        |
| TERMITE       | VSGFYKLLTVALQLCDRLHYFSDYGD <del>M</del> L-----N                                                                                                                                                | 667        |
| SALPINGOECA   | VSSLYKLLLELANTIATEQRYFEAASKTAETA <del>A</del> -----G                                                                                                                                           | 694        |
| ROTIFER       | ISGFYKLLATLIMKMAVKIGYFNKIDSIQ <del>T</del> NLN---TSSDSV <del>M</del> LIEDCD <del>P</del> DSMY <del>S</del> STI                                                                                 | 714        |
| SHRIMP        | VSAHYNATTTVLTCSRQ <del>T</del> QFFSRK-----                                                                                                                                                     | 685        |
| SCORPION      | ISGFYKLLITVCLTICKKTRYFQHVKKLKTKEE-----I-----SM                                                                                                                                                 | 694        |
| SPONGE        | VSGFYKLLTVCLSICNKT <del>H</del> FFDVHDL <del>S</del> GQGTG---DD---DVAMET-----E                                                                                                                 | 706        |
| <b>HUMAN</b>  | <b>ISGFYKLLSITV<del>R</del>NAKKIKYFEGVSPKSLKHS-----P</b>                                                                                                                                       | <b>695</b> |
| ESHARK        | VSGFYKLLSATMKI <del>A</del> KKIN <del>Y</del> FKGVSTNTWKQC-----H                                                                                                                               | 702        |
| LIMPET        | VSGFYKLLALCMKISNKLAYFQVNES <del>N</del> -----E                                                                                                                                                 | 681        |
| LINGULA       | VSGFYKLLAICMHATRKTAYFKDISLSRDQDG---GE---NSMI-----VEEK                                                                                                                                          | 700        |
| TRICHOPLAX    | VSGFYKLLLEICMTISSSLYFEDLNIE <del>T</del> VTKC---TI---NAAA-----EA                                                                                                                               | 684        |
| STONYCORAL    | VSGFYKLLLEVCMKCEKLSFFKNIAEK <del>P</del> DLK---NE---NLNLEI-----V                                                                                                                               | 712        |
| STARFISH      | VSGFYKLLTVCMNICTQIQFFKCIKPSDLSSQ---ED---SMDIDL---NFSSSSCV                                                                                                                                      | 714        |
| LANCELET      | VSGFYKLLSVCMTICTKVYFKDLDTKLLSFS---EE---SMDTEG---R-----D                                                                                                                                        | 714        |
|               | :* *.                                                                                                                                                                                          |            |

Supplementary Figure 4: CLUSTAL All phyla small

|               |                                                                    |            |
|---------------|--------------------------------------------------------------------|------------|
| APHANOMYCESE  | ----PPAVQDEYIDFILGVVNAMKAYSNELLSVTSIFVLATPLSMV-----DVKMLI          | 694        |
| FLATWORM      | AMENRIQCCAMLGSAASLSARCGQLRGDLLAASLRFLLSLPAALLAV-----DRPDDAL        | 780        |
| STYLONCHIA    | KKGKQNTYNMLLTFFKELIGKQEEYQDELLSCLDLDLHVQVQILYRQDKKTDNVQNWK         | 738        |
| TRICHINELLA   | ----NSHYKLLSDFIDHVLVESCRFQGEELLVSLRFLALPTCIVVE-----KLESIK          | 727        |
| HETEROSTELIUM | ELENKRNCFKLFAKFLKEVEAASSTQYKDELLASVIQLLLSVPKQLV-----NIPVLI         | 843        |
| GLOMUS        | ASPTQRASYFLFIKFFDEVSARLPQYKDDLLASCLRLVLSIPRELI-----NIQNL           | 777        |
| MOSS          | LEEDRRRLCKELFRKYLQEVLVASRRYKLELLAACLRLCLSAPLLIV-----GIASII         | 761        |
| TERMITE       | QPTEQKASYSLLCRFLQELLIRLQYKNDLQVACLETVIAAPVALVVP-----LLPHAV         | 721        |
| SALPINGOECA   | NMLEVAATLELMSKFGKEVMVRSKQYKDELLSACLTFVLSLPLPVVVKR-----DFAVFF       | 748        |
| ROTIFER       | SEYERVNCFHLFKKYLLEVSIRMKQFKDELLVSCLEFFLSLPEFVII-----SMDHSF         | 768        |
| SHRIMP        | QDPEVETS IHLLMSYVRELLQRCRQYRDQLLASCLTLILHLPLCIVQE-----IFPQLV       | 739        |
| SCORPION      | SEKDCI AFELFAKFSREVVIIYLQQFKDELLASCIEVILSLPTEIVES-----EINILI       | 748        |
| SPONGE        | ERTRDQSCYFLFSSFIKEV VVQMQYKDDLLASCLHLILVLVPEKEMVVS-----DFKELI      | 760        |
| <b>HUMAN</b>  | <b>EDPEKYSCFALFVKFGKEVAVKMKQYKDELLASCLTFLLSLPHNIEL-----DVRAYV</b>  | <b>749</b> |
| ESHARK        | TDPEKACAFALFGKFGKEVTIRMKQYKDELLVSCLNFLVLSLPHDIIEI-----DIKAYI       | 756        |
| LIMPET        | QEKQKAVCYLLIKKFSKEVLVRMKQYQDDELLAACLTLILSLPKEIITE-----QMIDVV       | 735        |
| LINGULA       | IGTDRETAFLLSKFTKEVLVRIKQYKDDLLASCLSFILALPPELVIA-----DLPTIV         | 754        |
| TRICHOPLAX    | ESIDKYLCLLYYKFYKEVLVRLKQYKDDLHVSCLSLILALYQLIQD-----DMALII          | 738        |
| STONYCORAL    | DTSDCMKCFVLFHKFTKEIVVRMQYKDDLLFSCLLVVLSLPLELVTL-----DLVSSV         | 766        |
| STARFISH      | SASDRICFTLFAKFSKEVLVRLKQYKDDLLASCLLLVLSLPHIVQA-----EVAHLV          | 768        |
| LANCELET      | RPSEGOACFTLFRKFVKEVLVRLKQYKDDLLASCLLLVLSLPHQIVQS-----EISTLV        | 768        |
|               | : : : * : : * . :                                                  |            |
| APHANOMYCESE  | PALKQALS LGTSHNDTAVAAVSALENWHQVQPN-----ALKQFYQELLPLFAPYLISTSNE     | 749        |
| FLATWORM      | AAVRRGLRLGRFWPPLLEAALAEERWTAASS----AGLSDRVAPVLAGLLAVLLSDGG         | 836        |
| STYLONCHIA    | VIMQKAI DLGRNNQLAWNSINMLEQWFNLLPM---NVTLDLYHDILPKLSDFLQVDDN        | 794        |
| TRICHINELLA   | EAIKSSLKLGLNLYPIACVCMDALEKWSAEFFPEDE--PQLDSFYTDLLPIFDDYLRCTSV      | 785        |
| HETEROSTELIUM | PTLSTAFRLGLSYLKLGHVGLNTIEYWLSVLPE----EVDALHYA IILPALSDFYLISTT      | 898        |
| GLOMUS        | SPICIALKMGLSYQPLATIGINAIEKLVLDQGP---QDISKWLEQIILPLFNEYLLVKAD       | 833        |
| MOSS          | PSLRNALKIGLRYPPPLAEVAMDSLERWQAAFPE----QLQHWLPQIIPCLNDYLVVDEK       | 816        |
| TERMITE       | PAFEVIFRVGRSMLPLARLGLSALDKWYCTLPS----HLVTPPLMQVLPYLDPFRLRSQV       | 777        |
| SALPINGOECA   | PAVETALS LGLGFYPLADAGLSALETWLPPALA-----AGRPFQALMPLLDKYL SAAVA      | 802        |
| ROTIFER       | HCLNQALD LGVNYLKLAEADLNSLEYWLKNIPT---QLIKPYFPSILTKFENYLQASSN       | 824        |
| SHRIMP        | SPLQMALQLGVSYLPLAEVCILALQLWTKSLSQ---EILSEHMPHVLLPLLYLRSQET         | 795        |
| SCORPION      | PAVQISLQLGLSYLPLAMSCDLALETWLYSLPS---ELLKEHYCKLLPSLNDYFLASDN        | 804        |
| SPONGE        | PAIKLALRIGMGYLPLAKSVMEALEKWTLYIVESDKMDTLQCLVNEIILPLLDYLYKATSV      | 820        |
| <b>HUMAN</b>  | <b>PALQMAFKLGLSYTPLAEVGLNALFEWSIYIDR---HVMQPYKDIILPCLDGYLKTSAL</b> | <b>805</b> |
| ESHARK        | PALQAAFKLGLSHTPLADAGLDALEDWSAHIPK---HI IQPHYKDIILPHLDGYLKTAAF      | 812        |
| LIMPET        | PAIQVALTLGLSYLPLAGIADALEYWCHNLPD---HIVKPHYSCILPYLDNYIRTVDK         | 791        |
| LINGULA       | PALKITFKLGLSYQPLAVEGMEAEFWRDSIPN---HLLQPHYQDILPCLDDDFLKLQSE        | 810        |
| TRICHOPLAX    | PAIKVSMNIGLSYLPLANAAIDALERWSSDLPO---NIGPYFSDILPCFDDYLYKSSAD        | 794        |
| STONYCORAL    | AALKLTFKLGLSYTPLAEAGLDALESWTALPA---DKLKPFLREILQCLDGYLTTLGD         | 822        |
| STARFISH      | PALQMTFQLGLSYLPLAETGLEALERWMLHLLP---DSLQPHLKVILPCLDGYLYRGTIT       | 824        |
| LANCELET      | PALQTTFRGLSYLPLAHAGLDALEWRWLLNLP---SALEPHFPHLIPYLDLYLQTAAD         | 824        |
|               | . : * : : : : : :                                                  |            |
| APHANOMYCESE  | G-----                                                             | 750        |
| FLATWORM      | SGAGLTDAAEAE-----QRGGADRRSLARQSV--ARALR-SIEARRAKNYAA-GGG           | 885        |
| STYLONCHIA    | KKQKKNLNDAT-----GGDTYQYLEMLK-----S-GNE                             | 820        |
| TRICHINELLA   | DETLVNNGFNY--NG-----EKSTFFNKKLQTVNSD-SENVL---VKADDNDSEE            | 830        |
| HETEROSTELIUM | NTSSSNQESANS-----KTGMLMGRGAAPRMNTKSID-F---VD--PK-LLA               | 938        |
| GLOMUS        | SVDNSIKEFAQI-RNTQRNRNGFNKSLDQTRKERVKSKGQKSYKT-----VVGIGQLE         | 886        |
| MOSS          | ADVSEPGETSLVTEAVGTS-----APTISSMSRQGLAQ-----IKRARA-KDS              | 857        |
| TERMITE       | ASGQDVIIIEKELMVLGR-----RNRTNYSQNKKVARK-----KI-IEH                  | 814        |
| SALPINGOECA   | ASDIDVEEEMKL-----LSRSITRKRQAA-----VV-AVD                           | 832        |
| ROTIFER       | KSDLDSDEKVI---LL-----NLSHGKGRKKLPVKLFD-----KSS-----L               | 859        |
| SHRIMP        | GGEAEVHTRVITVKMA-----FARQRRKVDQKMK-----ES-KRV                      | 830        |
| SCORPION      | ISLQPLK-NIHT-----FTKQSLVVKKLPLKISQ-----YKKIKQ-TDL                  | 842        |
| SPONGE        | QLKEED-GG-----RGQYATKRYARMKVE-----KWSEGL-HQG                       | 855        |
| <b>HUMAN</b>  | <b>SDETKN--NWEV--SA-----LSRAAQKGFNKVVVKHLK-----KTKNL-SSN</b>       | <b>843</b> |
| ESHARK        | N-EAQN--NWEV--MN-----INNPSRKGGSKVLFHHTK-----KSKEF-LVS              | 849        |
| LIMPET        | GMVAFSI-----FMWY-----IS-----CGMHIRFSLLSFSSSF--STINCLLY-FQS         | 832        |
| LINGULA       | QAGNET-NSPSTLI-ME-----PKGHSYSRKKGLPIKLLK-----PAVAK---E             | 849        |
| TRICHOPLAX    | DTTETLVEDS-----SK-----ALKARTGKAKKLPVKVVN-----PT-GGS                | 829        |
| STONYCORAL    | IQLHNECN---TIVLIT-----SSHHTSRGRKLPKLLK-----MKPQSQ-HQM              | 862        |
| STARFISH      | QGSDAADVVQTVTMS-----ASSSQRAGKRKLPKAKLI-----GAS-TT-GQT              | 866        |
| LANCELET      | TGSSSSSDGFQTVSLT-----AASSTRGKRKIPVKLLK-----AAA-ER-NQV              | 865        |

Supplementary Figure 4: CLUSTAL All phyla small

|               |                                                              |            |
|---------------|--------------------------------------------------------------|------------|
| APHANOMYCESE  | -----LTVQLKLLKILGSMGGYSRYVQEEEDPQ-----L-----                 | 781        |
| FLATWORM      | AELGLAEMQKRVLLFLGSAQSSFKYQLAEIASD-----KAATADLAAWSP           | 930        |
| STYLONCHIA    | VNIERKDIALKVMDDLKIGKIGNAHSIISNEQNK-----LIERENFIKWDP          | 865        |
| TRICHINELLA   | EMPNPQSVLRRIASFVGSGLCYMNRFLIDSADV-----GSLLRWQ                | 871        |
| HETEROSTELIUM | QRTVVEEMQTRVIRILGKLGQNYHLMGVSNLM-----APGTESEGVAWDT           | 983        |
| GLOMUS        | KNVGLHDLQVRVLRLLGRLGGVSKFLFEDIVNNDLVYRPIPTMNPAGSKMSNNKLLAWDP | 946        |
| MOSS          | QSPFELIQVRVQRFLLGCIIGGLGHFLVPEVDLL-----QLTGTGGLAWDP          | 902        |
| TERMITE       | PESELSQLQHEIISFLLGQLDSTTCLALLKDPQQ-----EEDVIPWAT             | 856        |
| SALPINGOECA   | SDNPFPAALKMRILRLGAMGGQNNHLELALEHQGAG-----GGSDVGEGETPPWVAWDM  | 886        |
| ROTIFER       | NFDVYEIQILKILKILGQLSADMSSHVHL-IDN-----EDITSDWT               | 899        |
| SHRIMP        | EETAMQKIQLMILRLIGSLDPLRLHTIP-QDP-----DTIASAAVRWNV            | 874        |
| SCORPION      | HESELIKVQHRILRFLGSGVGNQYNFAMIS-ADK-----IKIHEVAVAWDI          | 886        |
| SPONGE        | SRDDITSVRRRILLLLGLSGGVNNESSLKVPSP-----HSLVSWDS               | 896        |
| <b>HUMAN</b>  | <b>EAISLEEIRIRVVQMLGSLGGQINKNLLTVTSS-----DEMMSKYVAWDR</b>    | <b>888</b> |
| ESHARK        | EDSAITAVRRRIVRLGSLGGQNNRSLVTAVSA-----EEMMKRCIAWVT            | 894        |
| LIMPET        | YESKLGVIKDRVVQYGLSGGGSINYTLTNT-NSQ-----DDISKQAIWDT           | 876        |
| LINGULA       | ESSQLELLKQRIVKFLGNLGGATNAAMVQ-CTS-----EDIAKTAVAWDQ           | 893        |
| TRICHOPLAX    | KDSPLAQVRLRIVQLLGRGLGNTNSLVR-KGN-----DDGSSQAVAWDN            | 873        |
| STONYCORAL    | TLTPLAKVRHKILRMFGGLGGETNILLDDNTGI-----N--SSNAVWDT            | 905        |
| STARFISH      | QDSPLRVQLRILHLLGLSGGQTNAYLLE-TSA-----EEIAKVAVAWDT            | 910        |
| LANCELET      | QESDLVKARLRIVRFLGSLGGHTNACLVTGLTA-----EDLAKRAVWDT            | 910        |

: .\*

|               |                                                                      |            |
|---------------|----------------------------------------------------------------------|------------|
| APHANOMYCESE  | --SAPLDISLAMENVH-VEIPISNLIHQMKDLALTSIDRGIKSAAEGYHAMVLYLGGKT          | 838        |
| FLATWORM      | -GGRLLYFDLPFADSK-PRLYLDDPLSRCAVALATESSSRQSKVAAECLHSIVLLMTGRC         | 988        |
| STYLONCHIA    | --EKRLKFTVPLYTKK-VDIYFDACLPKVVDLAKNSSDRETRVAACEFLHALIYMIKGN          | 922        |
| TRICHINELLA   | --GSHLEFICPPDMK-FEIALDTPRLCDLALSAGDRPLKVAACEALHACVFLFLGNE            | 928        |
| HETEROSTELIUM | --ISRIQLQIPLGDLNGVSIYLDVSLPVIVTLATRSTRQTKVVACELHHSIVLYMVGNT          | 1041       |
| GLOMUS        | --EKRVSNIPFPDTK-VEILFDEFLLPRIVELAESAPDRKTKIVACESLHSIVIMIGKS          | 1003       |
| MOSS          | --IDRVKFTLFRQDK-PDIWLDLSSLRMVEIALSSDRRMKVTASELLQAVCLLMLGNA           | 959        |
| TERMITE       | CLQQPLVFPPLPFKDMK-LNINLEKLIIPRVVELAMTSSDRYTRTFACELHGVMLILGSG         | 915        |
| SALPINGOECA   | --TNHLKFAVFPQEMK-PEVQLDPMPLPRIVELALHSGDRQTRTAAACELHSHAMVLYMGQ        | 943        |
| ROTIFER       | --VQHLKFYVFPFDIK-PTIYFDRFLPRVIHLAQNSPSRQTKINACELHSHALVIYTIKGS        | 956        |
| SHRIMP        | --QKLVKFAFPFEHIK-IDIYLDLPHVVDLAVNSSDRQTKVAASELHSHIILMIGTG            | 931        |
| SCORPION      | NKQNHKIFYLFPFDIVK-LEIFLDKFLPRIVTSTTASQRQTKVAACELLHSHAVVTFMVGCG       | 945        |
| SPONGE        | --DRRLGFVAVPFSDLK-PEIYLDPLPTCEALSSSDRQTKVAACEFLHSHAMLFVIGK           | 953        |
| <b>HUMAN</b>  | <b>--EKRLSFVAVPFREMK-PVIFLDVFLPRVTEALATASDRQTKVAACELLHSHMVMFLGKA</b> | <b>945</b> |
| ESHARK        | --EKPLSFVAVPFMDMK-PIIYLDSPFIPRISELAALSASDRQTKVAACELLHSHVAVYTLGRC     | 951        |
| LIMPET        | --EQHLRFETPFIDMK-PIIYFDPFLPHVVELASTSSDRQTKVAACELLHSHLILYCLGRG        | 933        |
| LINGULA       | --EKHLKFDMPFMDVK-AALYLDLDFLPRVVELATLSSDRQTKVAACEFLHSHMVMLYMGKS       | 950        |
| TRICHOPLAX    | --HKRLPFAIPFQDMK-PIIHLDLDFLPRVVELATSSSDRQTKIAACELLHSHALVLYMIKGRG     | 930        |
| STONYCORAL    | --ENHLTFVAVPFQDMK-PSIYLDLDFLPRVVELAAKSSDRQTKVAACECLHSHLVHYMLGKS      | 962        |
| STARFISH      | --QPRLQFVAVPFVDMK-PNIDLDLDFLPRVVELALTSGDRQTKVAACECLHSHLVFMLGKG       | 967        |
| LANCELET      | --QTHLQFVAVPFMDMK-PTVLDLDFLPRICELATSSSDRQTKVAACELLHSHLVLYMVGQG       | 967        |

: : : : : : : : : \* : \*.\* :

|               |                                                                    |             |
|---------------|--------------------------------------------------------------------|-------------|
| APHANOMYCESE  | ATLPRSKSS--ANEKSIYDHWANVFPVSLVMLASDADTITRSLFAPLLSQLLRWFSGISS       | 896         |
| FLATWORM      | AFASTSGND-----REQLTLWRLLPALPLADEDPVVKQLFQPLLMQLVHWFSSRSRE          | 1043        |
| STYLONCHIA    | ASAPKGRGNQQQEVAPFAKIYKLFPPVMIHLATEVENISRQLFEPLIFQIVRWFSSNSTV       | 982         |
| TRICHINELLA   | SFRTVKMKD-----RESISKAYSHLFPVLLKACDVEVPKQMFSTLQVILHLFSGTDF          | 983         |
| HETEROSTELIUM | SG-----G-----SFHRLYRRVFPALLRLAVDVEVVARQLFSPPLIMQLVHWFTKNVR         | 1088        |
| GLOMUS        | AFQLSRQ-S-----QSPFYRIYKIFPALLRLAIDTDPVPRRIFRRLVAQLIHWYTNNAQ        | 1057        |
| MOSS          | AKGPMRRRGGED-SQSVHFDKIYKRLFPAILRLATDVELVTRQLFLDFVVKQLIHWFTSNQQ     | 1018        |
| TERMITE       | QEAQT--SH-----PDKYSELFRKLSLPLKLGCDPDPAPHRLYNLVQLVHWFSSKFK          | 968         |
| SALPINGOECA   | AGSGTHAAG-----EDNLSPLYRHVLPVLRACDVDLVPKQLFSPVLMQIHWFSSTRT          | 998         |
| ROTIFER       | VSEPEGYSQ-----SYQMTKIYHRLYPCFLGSCDTHDFVRNLFQPLVMQMIHWFTGNRK        | 1011        |
| SHRIMP        | AQKSQETQL-----KEPMAPLYRHIFSAMLRLACDPDHVTRQLFLTSLYQTIHWFTNNRN       | 986         |
| SCORPION      | AQQQPELQA-----IYSMKLYKNVLPALLQLACDVEVARKLFEPTFQLIHWFTTKRM          | 1000        |
| SPONGE        | TQQS--VQK-----KNPMTKLYQKLIIPVALQLACDVRVAEQFRPLVFMQIHWFTTRNTQ       | 1006        |
| <b>HUMAN</b>  | <b>TQMPEGGQG-----APPMYQLYKRTFPVLLRLACDVDQVTRQLYEPLVMQIHWFTNNRK</b> | <b>1000</b> |
| ESHARK        | SQISEGQOE-----TLYKLNQLFPVLLRLGCDVDVTRQLFEPLVQLIHWFTSNRK            | 1004        |
| LIMPET        | AQQQPEVQK-----RYPMQLYKLFPPMLKACDVEQVAKQLFEPLTMQLIHWFTNNRM          | 988         |
| LINGULA       | VQQPEGQOG-----RHPLDGLYRNVFPAMQLACDVELVARQLFEPLTMQLIHWFTTRSKV       | 1005        |
| TRICHOPLAX    | AQQPGGTGS-----VTNYGNLYKIFPALLTLASDVEQVQSQQLFQPLVYQLIHWFTGNRN       | 985         |
| STONYCORAL    | VTQPQGF-K-----KSPMEHLWKHVFPPTLQLACDVEQVSEQLFKPLVQLIHWFTNNRK        | 1016        |
| STARFISH      | TQQPEQQA-----KSPMQHLYRNVFPALFRLSCDVEQVAKQLFEPLVQLIHWFTGNRK         | 1022        |
| LANCELET      | AQQPGEMQA-----KNPMTRLYKLVFPVLMQLACDVEQVAKQLFDPLMMQLIHWFTNNRK       | 1022        |

. \*.\* : : . : : \* : :

Supplementary Figure 4: CLUSTAL All phyla small

|               |                                                                      |             |
|---------------|----------------------------------------------------------------------|-------------|
| APHANOMYCESE  | MYPFEAQIFLDSLIDGISS--ADDGGAREVCALSSTFLKYASKQPGS-----TSF              | 945         |
| FLATWORM      | FEGPYTALLDLSLFDRLTASSGDASVRLDAAQSLREFLTWSVRQQMPSSGADSTASFYSR         | 1103        |
| STYLONCHIA    | YDHPVESLLEALIDGASS--RNNSASRDLCNSNAVAEFAKWSLKQMTDKNIK--E---NPN        | 1036        |
| TRICHINELLA   | ANKMVTSCLLDITLMDGLCC--FWNSSLRDQSAYYISEYCRWSMRKVDSGGQN-MR---SES       | 1038        |
| HETEROSTELIUM | AENDETMALLNSI IDAVN--GEDGALREFGARALGEFASWSLKHAPTTKST-ANEARSFAF       | 1145        |
| GLOMUS        | YENQETMALLQCCLDIAICD-T-WGSLRDYGAECLEFLIWSIKQSSATHAE--E---SSM         | 1110        |
| MOSS          | KENPDTMALLDAILDGLVD--PDNGSLREFCADMFSEFLQWSVRHAPPEDD-----NFV          | 1070        |
| TERMITE       | LKSKEVEIILQITLMDGITH--PTDTALRDF SARCLHEFVWVSVKQG-----SHV             | 1015        |
| SALPINGOECA   | -EREVVLLDAILTGLAD--AKNSALRDFCATCVKEFYVWAYKHSTDKLLE--T---GG           | 1050        |
| ROTIFER       | YESDSTIQLLGCIMESLVD--EKNAALRDFSVNCKEFLKWSIKHTPLSKQE--NSAPTVP         | 1068        |
| SHRIMP        | FENVDTMVLLEALMEGIVT--ANDPALRDVSAQCLAEFVKWSRKQC--RQQN--S---VSS        | 1038        |
| SCORPION      | INSDETKQFVQVIWDGLVQ--SKDAVFRDF SARCLKEFVQWSIKQTSVREQE--E---NPI       | 1054        |
| SPONGE        | YESPDTVTLLEALELEGIEH--PTNASLRDFSAQCIKEFLVWSIKQTSKKQOE--R---SPM       | 1060        |
| <b>HUMAN</b>  | <b>FESQDTVALLEAILDGIVD--PVDSTLRDFCGRCIREFLKWSIKQITPQQOE--K---SPV</b> | <b>1054</b> |
| ESHARK        | FESRDTVAMLEAILDGIVD--PVDSTLRDFCGQCVREFLKWSIKQTPPEQQA--K---SPA        | 1058        |
| LIMPET        | GESSETMALLDITIFDSIIQ--ADDTSLRDFSGKCLREFLHWSLKQSSVKTVE--K---SPV       | 1042        |
| LINGULA       | FENPETAAALLNAVMEGLID--PSNASLRDFCARCIEEFLKWKALQKTPSPAQLR--K---NPH     | 1059        |
| TRICHOPLAX    | YESVETIALLNALDGVIIH--STDSALRDFCAKSLREYLHWSIKQTTKKQOE--K---TSN        | 1039        |
| STONYCORAL    | YETPETMALLDAIVDGIHV--PVDTSLRDFSAQCIKEFLQWSIKQSSSEKQLE--K---SPI       | 1070        |
| STARFISH      | FESEETIALLNAMLDGVIIH--PTDTSLRDFSAACLKEFLKWSIKQTSKKQOE--K---SPI       | 1076        |
| LANCELET      | FESEETITLLDAIMDGLVH--PTDTALRDFSSRCVREFLQWSIKQTPPKQLE--K---SPI        | 1076        |
|               | . : : * : : : : :                                                    |             |
| APHANOMYCESE  | SAHTLFRERL FALSSHVPVRSCLRGIALVNVQFYRDFREDQEMVDIYAISIQKYL LLAIKSE     | 1005        |
| FLATWORM      | NVKSIVKRVCLLALHPASSKRLGAALAFNAVYAQFREEDSLVNAFAFELLHCFMRSIQLA         | 1163        |
| STYLONCHIA    | NIKSLIRRIESNSNHPDPFKRLSSVLCFSKIFSVIREHDPLIDRFCMEIAHNVLGSLKMC         | 1096        |
| TRICHINELLA   | KVELLVQTIITFAVHSSAVKRAGAAVAFNNLYKIIREKRWLVDIYILEMFFTFMKSLYLA         | 1098        |
| HETEROSTELIUM | NFKSLLKRVYSLAAHPSAQTRMGAAASLLSIRVMREDDNLISVFLFEIAHQVLLSMRLC          | 1205        |
| GLOMUS        | NMKSLLKRLYNLCAHPDYTKRLGASLAINIYRVFREEYLVDFQTFPELLYWMLVNLRLS          | 1170        |
| MOSS          | NVRSMLRRVYNRMAHPNPYHRLGAAMAHRMYPVLENGAIVDRYIFELFFCIKSLKLG            | 1130        |
| TERMITE       | NIKYVMKQIYSFCLHPCPSKRLGAALVLSVYTVLREEESVNVQFWLELLYHVMNLSLS           | 1075        |
| SALPINGOECA   | LKVLLKRI MSMAHPNAPQRMGAALAMNNIYTRLRESDTLVDVYVCELTDFVMSRLQLA          | 1110        |
| ROTIFER       | NAKSLIKRIFNFLTHPNANKRLGACLAWNSVYTFREEESIVNRHIFELFYLIESLAMS           | 1128        |
| SHRIMP        | NIKSLIKRIFSFCKHPSAFKRLGALAWNSIYREIREDDQAVDWTLLLAHLMTSLDLA            | 1098        |
| SCORPION      | GMNVVLNCLYNYSLHPNPYKRLGAALAFNSIYTFREEESLVDKFTLEI AVHFIESLATA         | 1114        |
| SPONGE        | NTKSLKRLYSMSGHPSTAKRLGAALAFNSIYTVLREEESLVDVFIEMLVVMVNSLKLA           | 1120        |
| <b>HUMAN</b>  | <b>NTKSLFKRLYSLALHPNAPKRLGASLAFNNIYREFREEESLVEQVFFPALVIYMESLALA</b>  | <b>1114</b> |
| ESHARK        | NTKSLFKRLYSLALHPNTPKRLGALAFNSLYREFRQESALVDQFIFEVLVVYVESLALA          | 1118        |
| LIMPET        | NASSILRRIFSFALHPSVFKRLGALAFNNIYQIFREEKSLVDRYTFQILVHFVESLSLA          | 1102        |
| LINGULA       | IPKSLFKRIYSFALHPSFPRLGALAFNHIYRVFREDEVLLDIFTFEILETFIESLAMA           | 1119        |
| TRICHOPLAX    | NAKSLKRLYSLASHPSAIKRLGALAFNNIYVVLREESTLVDTFIFEILVNYVNSLALS           | 1099        |
| STONYCORAL    | NIKSLKRLYSLALHPSASKRLGALAFNNIYTVFREEASLVDIFVLEILVNYLECLCLS           | 1130        |
| STARFISH      | NTKSLKRLYSMALHPSPFKRLGALAFNHIYTVFREEESLIDQFVCEILVTFVNSLALA           | 1136        |
| LANCELET      | NIKSLKRLYSLALHPNPNFRLGALGFNSIYRDFREESSQVDMFTFELLVTFVESLALA           | 1136        |
|               | : : : * * : : : : :                                                  |             |
| APHANOMYCESE  | GSD-----S-----ALSLHHAVDHMEKII LKSAP-TLQHENPDRMILGG-----SGC           | 1046        |
| FLATWORM      | DAD-----DA---SLGTVEQCNLALDHLERIMVERAA-TLKVESQGRRTPLGSKWTS---         | 1211        |
| STYLONCHIA    | HNS-----IEFSQEVINDNCIMMLEKVSQVQVKRIS-ILMNVPKRSIH-----                | 1138        |
| TRICHINELLA   | END-----DE---LYGTVDECKQA IKHIRRIILHNLD-MLQIHNQVRRTPNE---WSQ---       | 1144        |
| HETEROSTELIUM | GAVADEGDDTTLEVEVGEKLQAV IDAVRVVIERRAE--LLNRTNNNRREH-----             | 1254        |
| GLOMUS        | DND-----QS---ATGTRQQAISAIRHLKIIIVKSN-LFLNDTPRRRKFPN---LNR---         | 1216        |
| MOSS          | ELD-----DE---QIGTMQMNKTVELLQRLVTRNIT-LLEKKRKRDP L-----F-----         | 1171        |
| TERMITE       | EET-----DS---ILGGQEVVTVAVNHIERVLKEKAS-LFNKEDNIRRKPEE--FEG---         | 1121        |
| SALPINGOECA   | HRD-----DP---AMGTATHTERVLTNLRRIILKKAD-KFRRTSRVRRIPP G--WET---        | 1156        |
| ROTIFER       | END-----DK---MFGTQEQC KGLDHVERIIFKSD-ILNQIDPKRVKPPG--WSE---          | 1174        |
| SHRIMP        | QVD-----DP---ALGTHEQTKSAINHIERIIRVKSD-LFQKKSQRRLP PG--FGD---         | 1144        |
| SCORPION      | HYD-----DK---ILGTQDKCKQALNHLERIMEVKAK-LLSKTSKRRRPLRN--IND---         | 1160        |
| SPONGE        | HKD-----AQ---SIGTVDQCSLSL DHMSRII KAKSSTCLSKANKNRRVPRG--LKS---       | 1167        |
| <b>HUMAN</b>  | <b>HAD-----EK---SLGTIQCCDAIDHLCRITIEKKHV-SLNKAKK-RRLPRG--FPPSAS</b>  | <b>1162</b> |
| ESHARK        | HAD-----DN---SLGTVQCCDAIDHLNRIIKQKAS-ALNKP IK-GRVPRG--FPPDQF         | 1166        |
| LIMPET        | HKD-----DK---SLGTQECCA AVLKHLQRIIIFHED-ILKPKSKIRQEPRE--WSN---        | 1148        |
| LINGULA       | HHD-----DK---SLGTQEQQVQLNHLERII VNKAA-LLCKDSKIRRKPKT--WNK---         | 1165        |
| TRICHOPLAX    | HTD-----EK---SLGTQEQLSKALAHIERI I KAKAS-TLNKESKNRRTP TG--FMTK-T      | 1147        |
| STONYCORAL    | HGD-----EE---ARGTQEQCQVVIHLERIIHSRAQ-LLVKENHRRRIPRG--FASQSS          | 1179        |
| STARFISH      | HHD-----DK---SLGTQLHGVEVLNHLERIIIRVKAD-MLNKESKIRRIPRE--FPAGVC        | 1185        |
| LANCELET      | HHD-----EK---SLGTQAQCVAVLTHLDRITTKAD-LLNKHSKVRVPRG--FDRESF           | 1185        |
|               | : : : : :                                                            |             |

Supplementary Figure 4: CLUSTAL All phyla small

|               |                                                                       |             |
|---------------|-----------------------------------------------------------------------|-------------|
| APHANOMYCESE  | LNLESFTSWLFSNIANASPDFRNRCKLKFVTLT-----RMVGMTGSC----                   | 1088        |
| FLATWORM      | ATLEAVAVRWLVGQCQGPESACRAAAMRLLVNDGSPTRDRSRVRGGLARCLLTSPEKRRQ          | 1271        |
| STYLONCHIA    | QSVFTFILYLFEFKVAIETVCRRESMKLFEAYIV-----RCIPPTNIE--NM                  | 1182        |
| TRICHINELLA   | STVHCCCDWLLNMTWTSNYQFRSECFISYQELT-----DAEI-----E----                  | 1182        |
| HETEROSTELIUM | KDLADFVGVWFGEVGRMERRVRFTSIALFGRVV-----QLLPGQKRA----                   | 1296        |
| GLOMUS        | SDLSSLTEWLFIEITSRKEQDYSSMCRELFGFV-----KLLPDFKFG-----                  | 1258        |
| MOSS          | LALDDFLQWVFEQTRLLHGRSRTKCMLLFCISIC-----LSIPGCSSA----                  | 1213        |
| TERMITE       | ILLKDAVSWLLKCGTVQVECRHKCMELVYVLA-----PLLPVCKSG----                    | 1163        |
| SALPINGOECA   | CTLAEMTRWLSLTHACDLHAARVHQAAMAFFLHLA-----PLDTPPETG----                 | 1198        |
| ROTIFER       | PVLEAVAVRWLMRQCGRRIETECRHKAMELHSHKLA-----PNISGVKDI----                | 1216        |
| SHRIMP        | GTLVDVLKWLFEQCGRPKALVRHTCMELLASLA-----PQVKGCSAV----                   | 1186        |
| SCORPION      | SILPEVVEWILKNCGLQTECRHKCMELVFQLA-----PCLSGFNGC----                    | 1202        |
| SPONGE        | ADLSILTAWLLAQCGSIETEARMKCRKLLVQLA-----PPSSNVVNI----                   | 1209        |
| <b>HUMAN</b>  | <b>LCLLDLVKWLLAHCGRPQTECRHKSIELFYKVV-----PLLPGNRSP----</b>            | <b>1204</b> |
| ESHARK        | VSLKEVVMWLLTQCGRPQTECRHKCMVLYEYELV-----PLLPGNKTP----                  | 1208        |
| LIMPET        | KTLDIAVWLSRQCGRPQTECRHTCMKLVYNLC-----THVQGNVYFV----                   | 1190        |
| LINGULA       | ATLDICVWRLLRQCGRPQTECRHSSMMLVYKLA-----PCVPEFQSV----                   | 1207        |
| TRICHOPLAX    | VTLHHVVNWLVQRQCGRPQTACRHQCMQLVYGLA-----PQLSGVSTI----                  | 1189        |
| STONYCORAL    | ITLIHMIPWLVKQCGRPSSECRHQCMLRISKLA-----PLLPGVNSA----                   | 1221        |
| STARFISH      | PTLSMLVIVLLRQCGRPQTECRHQCMLIYKIT-----PLLPGHNTF----                    | 1227        |
| LANCELET      | PTLPDLVTVLLQCGRPQTECRHRCMLLVCSFL-----PLLPKPS-----                     | 1227        |
| :             | :                                                                     | :           |
| APHANOMYCESE  | -----KEWLKQYQ--KSHTVGQLIDVLAPQELIS-----LYFIEGM                        | 1122        |
| FLATWORM      | TAASPRQFFQALL--KQFKANYFYDRWERFQPHQ-----NQQQH                          | 1308        |
| STYLONCHIA    | PDNPVKWIFSYL--QRRGEKAIKRFKAKISFIEQNYDDQNDQLNHRLRSEAVRKTMLSE           | 1240        |
| TRICHINELLA   | -----KLHFLRHI---GTSIFGFIDHFERSHRVSLG----SFSIC-NLQDRVIKGTSTIYA         | 1229        |
| HETEROSTELIUM | -----NIWIQHQV--KQHGLAALIKMAEPPQTASA-----MPPKL----DGNNRH               | 1336        |
| GLOMUS        | -----FRWVKARI---DRDPKFLESLYKNSLSPSN-----VLHKGAAQQ                     | 1296        |
| MOSS          | -----HWFRANIC--SGDQVSSTVKQFDVGM-----YPHHPSLQQ                         | 1247        |
| TERMITE       | -----SEFVSWYA--ATHSWTSIRICEGSKE-----S--GGITVTPTLK--HLRNEVALVY         | 1209        |
| SALPINGOECA   | -----KPYATAHAWVAAFGAPALVALVEQGSAPQPL--LGVSVKP-----LEHSRAS             | 1243        |
| ROTIFER       | -----KDYFNIRL--VNESEMYFLARFEGSTLGKEILK--TSLSTYQSFLDLTGPKFQFGL         | 1268        |
| SHRIMP        | -----RDFIEKYV--GISKLSIIVDILEGGGEAKMG-I--SYVKNPTAS--SKHIGSSLDK         | 1235        |
| SCORPION      | -----KDYFSHLL--ETKGGKFFLNCFESEMSN-----TVP--SFNQDGLKP                  | 1241        |
| SPONGE        | -----RMWIRKTI--ESEGGNYFVTRFESHGH-----SGILKAPTLA-P---APNINI            | 1251        |
| <b>HUMAN</b>  | <b>-----NLWLKDVV--KEEGVSVFLINTFEGGGCG--Q-P--SGILAQPTLL-YLRGPFSLQA</b> | <b>1252</b> |
| ESHARK        | -----SCWLADVL--KERGVSVFLIGKFESAGSDHAK-C--SGIIYQPTLK--DLQEPFSVRA       | 1258        |
| LIMPET        | -----SFDLID---IVDKSTIIKKVFEGGATATHG-K--SGISACSTLL--KISDTFTLTS         | 1238        |
| LINGULA       | -----QGFQKFLKMESSGFPQYFMERFEAYIR--GGT-R--FTLKMCHTLG--DIGEQFTVKN       | 1258        |
| TRICHOPLAX    | -----QDWVKTII--GSSSVTFFITRFEGGGS-----K--YGIGRYQTAL--DISDTFNLRS        | 1235        |
| STONYCORAL    | -----ADWMKKT--HEDHPSSFVHRFEGGGG--GG-Q--KGIEQYPTLA--HIGGHFSLKE         | 1268        |
| STARFISH      | -----QTWMQNTL--KEKGPDYVSRFEGGGVKAAS-R--SGISKYPTLS--TMGQPFVSKL         | 1277        |
| LANCELET      | -----QAWMKERL--KEDGPDFFITRFEGGGGKGTGH-K--SGIKKPKIS--TMDSTFTVKT        | 1277        |
| APHANOMYCESE  | KNVWYETLAASTECCYTWACISITLGNSSLIDENVLLDPSASMKRLSTNADVQNSHRVF-V         | 1181        |
| FLATWORM      | PLGPLRALLACLECHLWLSLGGGLDPPQL-----LGCGG-----GSRIC-Q                   | 1348        |
| STYLONCHIA    | KQKTIEMTLAQIECFNFLSRKIASFSDI-----KSKL-----VDINVWMG                    | 1281        |
| TRICHINELLA   | LVLWLETYEAMIDGYVVALNTNRISMEAW-----NDYLL-----NEDPRVKSLLF-P             | 1275        |
| HETEROSTELIUM | VEFWMRRQLASLAVYIWFYFEGFDPVAI-----SKDG-----SSRIIS-N                    | 1376        |
| GLOMUS        | TKDWCSRFLSVLANYKWLKEKFPVPLDL-----ITSS-----GIMFR-K                     | 1335        |
| MOSS          | EQLWLTKFVRSIHWFWEALKENIISIKEL-----LDFE-----RDCVIHIA-S                 | 1289        |
| TERMITE       | VVRWLRMVLTSFDCYVVLFEELVKPSVL-----WGTEG-----LDNTSETRIF-E               | 1254        |
| SALPINGOECA   | IHEWLERLQATLEAYQLVLSHRLTTPRAL-----LVDC-----EMLLW-G                    | 1282        |
| ROTIFER       | LVTWLKLLNAPLDCYTWIFGQRLNPKSL-----FSTK-----KSCIW-S                     | 1307        |
| SHRIMP        | INIFLEALSASLDGYCWLIGQGIVPAAKL-----LNHS-----ELQLF-S                    | 1274        |
| SCORPION      | IINWLEGLHTMLDCYVWVFGQSVLKLSDI-----FNDA-----SNRESKFF-P                 | 1283        |
| SPONGE        | AINWLQSLQAQAVDNYRWLLKEQYVSPREI-----FSST-----SSSNLF-K                  | 1291        |
| <b>HUMAN</b>  | <b>TLCLWDLLLAALDCYNTFVRLAMVKPSEL-----LGTS-----QETGFM-K</b>            | <b>1292</b> |
| ESHARK        | ALQWMDMLAALDCYNTFVRLAMVKPSEL-----LGTS-----QETGFM-K                    | 1298        |
| LIMPET        | TMNWFDMLLAGLDCYTWVFGDLTPINI-----FSGT-----GSNTSKLF-E                   | 1280        |
| LINGULA       | AVLWYDMVLAALDCYKWTFTDNLRLPEDV-----FTGG-----HSSCIY-L                   | 1298        |
| TRICHOPLAX    | MKNWYDYFLAALDCYSWVFEKMSPEQI-----IGDK-----AQLGSKIF-G                   | 1278        |
| STONYCORAL    | TILWFVFLAALDCYTWVFEKMSPEQI-----FTSSE-----DNEMPSVLL-V                  | 1312        |
| STARFISH      | ACSWFDHLLAALDCYTWVFEKMSPEQI-----YTAT-----ARRPSVLF-Q                   | 1319        |
| LANCELET      | AVSWFDLLAALDSYCWVFGQRFVSPSDV-----LSGS-----GKKPSQLF-T                  | 1319        |

Supplementary Figure 4: CLUSTAL All phyla small

|               |                                                                    |             |
|---------------|--------------------------------------------------------------------|-------------|
| APHANOMYCESE  | AAKHFFA-----N-----VDEPTQARNRAFEGVCKLV--                            | 1208        |
| FLATWORM      | RLSDFFNETDPSLDPGRLLALSASVS-ASS-----AYSNSISEIRASAVTIRCQLIVR         | 1399        |
| STYLONCHIA    | NLYSFLADHIVIKFVKNERKSL-----DKLLICKEDKEILTKSRMVLITQ                 | 1326        |
| TRICHINELLA   | CSLDLVN-SIVI-----G-----RHFPNLSKAQRNRLNKRCKSFVA                     | 1311        |
| HETEROSTELIUM | AFYVFLS-EYALVDQSH-----P-----AMASLTPREIDQFMTLKCQTLHEH               | 1416        |
| GLOMUS        | AINYFLE-NLVQNDIEYLTPDAMEIDDGEYFIKKNVGSSENLTPAQKQLWLTRKIQIIEH       | 1394        |
| MOSS          | SISAFLO-SLLKSQD-----S-----IHQFLDLTPGEQDELQKLYEATTH                 | 1329        |
| TERMITE       | AAVYFIQ-HVCHRDAASVTCLLSTD-----TK---DVLEITPWEAESFDRTKCFVTIR         | 1303        |
| SALPINGOECA   | ALAHFLS-TFPRRSE-----LKRHDTPAEAAAARYLKCTVMVR                        | 1319        |
| ROTIFER       | SVEIFLD-KVASFSLQNFSLSHNYTE-----A-----HILFSPNEIDEYNGLKCTVMIR        | 1354        |
| SHRIMP        | ATTYFIN-EMALLTVSEYMKNHDAF-----QNAVATPYETEATAKLKCTVIVR              | 1321        |
| SCORPION      | SIEFFLK-TLCIDFDQRVQAFFTHE-----SV---KKQIFSPKKEDEYLRNLNCFIIVR        | 1332        |
| SPONGE        | SIDHFLK-CIALVGIEGVNSPEVA-----M-----ATS IHERGEYQRNKWCTIEL           | 1336        |
| <b>HUMAN</b>  | <b>AVAFLE-SIAMHDIAAEKCFGTG-----AA-----GNRTSPOGGERYNYSKCTVVVR</b>   | <b>1340</b> |
| ESHARK        | AMNFFLK-TLARHDITAAEECFTLG-----VK-----GVLFSRPREREYNYCKCTIIVR        | 1346        |
| LIMPET        | SLEYFLS-NISLRSIDEVSKLFKES-----S-----VEYFTPREDFNRNKCTVIVR           | 1327        |
| LINGULA       | VLSHFLS-SIALKDIEAAADLFTRG-----LD-----RKIFTPWEVEEYNRKCTVIVH         | 1346        |
| TRICHOPLAX    | SIEFFLS-KLCLHSLDETVKLLYSK-----ST---LQLFTPREIEEYNMCKCTTIVR          | 1326        |
| STONYCORAL    | SLKFFLS-HLAMFGITEATSCFTSG-----PSR--GMGDIFTPKEIDDYFRAKCTVIVR        | 1363        |
| STARFISH      | SLQVFLS-SLSLLDITGAARGIEYG-----GSKTSAFHQVFTPRESEYNYQEKCTVIVR        | 1372        |
| LANCELET      | ALEFFLT-KLALSIDIDAAARCFESH-----GA-----ATLFTPRETEDYNYGKCTVIVR       | 1367        |
|               | ..                                                                 |             |
| APHANOMYCESE  | -----TLAINSETS--LPLLSKQVDQSLVDNKFLEFVVQARIEPGRV--GLKEFSDTQ         | 1258        |
| FLATWORM      | TAALLQLLAGKQPD-----LKDLLQKENSNGLWLTALARATLRPQLL--GFDAQD-PS         | 1450        |
| STYLONCHIA    | FLRYLDQDLDEESLLA-----HADLFQKNCNFNIHFCVQIMVIPLIHQLQVLVED-QE         | 1378        |
| TRICHINELLA   | LCKLIAALISCQNLN-----NYQGFLKLLLYPNTWNAFLKVACDPKSL--GFRLYS-KQ        | 1362        |
| HETEROSTELIUM | VYALFSMLLEKYNYSQ-----VMTGGLQLLRVVGVSLLTPAVV--GYRTID-NN             | 1463        |
| GLOMUS        | LIGNIVLFKETDPNN-----VESLWNSNINGQFYKLLGNCLLRPNI I--GLDQLP-DN        | 1446        |
| MOSS          | LMKFCSQVLNAQSGYAEIEDLALRTIFMPDQSRVYFQQLLCLVLLKPRQL--GLVISE-LQ      | 1386        |
| TERMITE       | LLDMISTVLKSGEA-----GCLPHSLLNLQWQLIVACVLHPGSL--GFDLYN-TE            | 1351        |
| SALPINGOECA   | VLDVVRTVLRVDA-----SALPTKLWSGECLEDFICKAVLMPIML--DFDPSD-PE           | 1366        |
| ROTIFER       | LMDFLETFIFANYSKE-----SLDVI PMSLWNSNFFGLVINMMLNPTS L--GFSLKN-LE     | 1405        |
| SHRIMP        | LLDFVSVVLQEGPKV-----ASLLSQHSVWSATMFSLLTCCCTLDPASV--GFDIKD-TY       | 1372        |
| SCORPION      | LINFVTTIVENYHLQ-----LNTIPSTFWNSINFWNCIYSSVNLNPKFL--GFDMTD-TY       | 1382        |
| SPONGE        | LLTFIELLLTKHTSET-----VSFEYVVDLSWSQELYTI VMDSL FYSSLV--NTAPDD-PS    | 1389        |
| <b>HUMAN</b>  | <b>IMEFTTTLLN-TSPE-----GWKLLKKDLNTHLMRVLVQTLCEPAS I--GFNIGD-VQ</b> | <b>1390</b> |
| ESHARK        | IMEFACILILEGLQD-----CWKVKLEKDLLNSDLFELIAMVVIDPTS I--GFNMAD-VQ      | 1397        |
| LIMPET        | ITNFLSVLIGKYPKD-----AIKVIPTVWSDTLWELLIKCVVQPSV--GFNMGD-VE          | 1378        |
| LINGULA       | LLDFLCSTISKSGSH-----LEQVVPNSNIWCPDLWILICDCVNLNPSAL--GFNMGD-VE      | 1397        |
| TRICHOPLAX    | LINFLAVLLQMSPTS-----IIEGIPRQIWSQNLFEMIFLCILTPHQ L--GFNVGD-IE       | 1377        |
| STONYCORAL    | VLNFLTILLQDFPQE-----TLKTLPPFFWSEDLFEVVLSCVLEPGVV--GFHMGD-VE        | 1414        |
| STARFISH      | LWDFLTVLLENYASD-----AVKVIKSIWQDSLFDLVVTCILQPTVV--GFNMAD-VE         | 1423        |
| LANCELET      | IMDFFTVLGAFPQD-----AYKVVPAVWKSPLYDMVVTAALPTAL--GFNMGD-VE           | 1418        |
| APHANOMYCESe  | V-----WMNLCQS---LLRRQNLLFRNVLLQVLSN--SPY--                         | 1288        |
| FLATWORM      | L-----MAKLLDC--LSTAWHAVARNLAPVGSSYRSSIVSAIAAELELAGQSVTV            | 1498        |
| STYLONCHIA    | L-----ERQLRNQ--SELLRKLVAI-----KNL-DLAKI IKKD IVP--SMRCIN           | 1418        |
| TRICHINELLA   | F-----FECISQD--VRLFLALKNN-TFLVQQVSTSMKEYLTQFYYPW-P-----            | 1403        |
| HETEROSTELIUM | NNASNSGNKQVNELPLNLIVDRVCQLIVN----QGDKYRDTLIGYLGEMISS-S-SCNL        | 1517        |
| GLOMUS        | IV-----KQKLI IQ--VETLLKLFKK---LSINNVTQLAQDLAET A-----FSD E         | 1486        |
| MOSS          | R-----AQDLAKL--ASKVLTRFTQ---LSSNLKSEMVELLRVIEG--DDPAYD             | 1429        |
| TERMITE       | V-----TDGLPKN--LIQLLGVLET--LPSSQLEELNSELGKAVSS-M-QTEV              | 1394        |
| SALPINGOECA   | I-----EEKLPK--TGVVLASLCLS---G--EPRTNLVAAMRTLAS--DECDL              | 1407        |
| ROTIFER       | I-----FSNLSPK--IRQFYKLVIQN---LPTDKQNKFRQCCQIILD-SRELNL             | 1449        |
| SHRIMP        | V-----SKHLP SR--LEEILGILARR---GPSEVIGEYSDYLEKQLQK-P-ENDI           | 1415        |
| SCORPION      | I-----FNQFPKE--TRTLKVFY EY--MPKPLYNNFNEHLYEYLE--SKCNI              | 1424        |
| SPONGE        | T-----AKRISEA--AVSCLTAMCTS---LPIDVKQNL IAYIASNINT-GQTNV            | 1433        |
| <b>HUMAN</b>  | <b>V-----MAHLPDV--CVNLMKAKMS-----PYKDILETHLREKITA-QSIE--</b>       | <b>1429</b> |
| ESHARK        | V-----MKNLPNV--CVKLLNAVMS-----PFKETLVDSVRKRITA-QSIE--              | 1436        |
| LIMPET        | V-----MNNLPSE--VPTKLMFVGIT-----NFSDL                               | 1402        |
| LINGULA       | V-----MMKLPEQ--MEQVLRIFSR Y--LPPKALDMFRRTLKSKLDS-G-SYNL            | 1440        |
| TRICHOPLAX    | V-----LEKLPQ--MKDVCGLFQMK---LPKDKRELMITLKEKLSR-NRSYNL              | 1421        |
| STONYCORAL    | V-----VEKLP EQ--TGVLCCKLVQR---LSGECLERLKGTLEKKIAL-GSHCNL           | 1458        |
| STARFISH      | I-----MNNLPKT--TRKLLRLMSTH---LPANLRNNLSKAVTRS VTK--SSHDL           | 1467        |
| LANCELET      | I-----MEKLPQE--TKQLLLMCRS---LPSQQGALLKSQVAAKLSR-RSSHDL             | 1462        |

Supplementary Figure 4: CLUSTAL All phyla small

|               |                                                                      |             |
|---------------|----------------------------------------------------------------------|-------------|
| APHANOMYCESE  | -----RRENLFDMDSNLVQWICATYSELHKINFWSHDQOE-----D                       | 1324        |
| FLATWORM      | QRLLPQSGLAS---DPPSVAGAVRLARGVRLRDCGL-LADSTA-----DEKRQILD             | 1546        |
| STYLONCHIA    | LNHMFTVDN-----VQNYHPKMLMSMCLGYLKLASIDPNIKEYLI-----SFRSLPT            | 1464        |
| TRICHINELLA   | -----DVE-SVVTCDSHLAIEQQQLLNQVYGMVVEVGL-QSVVEL-----PRAEFLWT           | 1448        |
| HETEROSTELIUM | GEIGVLI-----TTEGTDRLVSLINGYNIHQKQSI-LDVTLK-----FAKLSLPA              | 1561        |
| GLOMUS        | VDLLNIEL-----DKSDPTYDQITHGYLVLSSSGL-FPDLLHEHMTSYMNTSSKL-YD           | 1538        |
| MOSS          | LNLSFSSKISGPKALSLEDALSLVKGYQLLSQVKI-LPLVLN-----KVRAGKLGFR            | 1482        |
| TERMITE       | LSNLQDSL-RN---DKVTLEQRQLLKGLEI LHKCGM-LSHIVKELPNQYGLDGNQIVKH         | 1448        |
| SALPINGOECA   | LRMVRDVL---PGRDIPAPLIKNNVSVGQQLAADL-LDECF--T---DRDAFGRE              | 1455        |
| ROTIFER       | -----DFVLVKDIDWINLSQTIAGYEILSDFKIFKITT-----D                         | 1483        |
| SHRIMP        | IKMLPLSL-SETA---HINLRSRHVIEGIGILEKSGW-LAKCNV---V-SYSVAKELVDW         | 1466        |
| SCORPION      | YNLFPLNL-ND---KDLKILEIQEMLLGYEQLIENKLW-----P---KQNCNKSKKLCD          | 1472        |
| SPONGE        | INRLPVSY-NEST-TSSGILLFNRLVQGHYI LAESNKCLSDVLR---SMGISEEESLMR         | 1488        |
| <b>HUMAN</b>  | <b>--ELCAVN-LYGPDAQVDRSRLAAVVSACKQLHHRAGL-LHNILP---SQSTDHLHSSVGT</b> | <b>1482</b> |
| ESHARK        | --ALCNVD-LYSPGARTDHAGRLSILSACQQLHKADL-LNSAID---CEAGLSLSSLSLK         | 1489        |
| LIMPET        | FSLLTNLS-LN---NPVVGHTVQLHLVSGYILNKTGL-LVNTNV---QQLVF-DTVYKVC         | 1454        |
| LINGULA       | LKKLPHIL-SGPSE---DHMTDSHLVAGYQLLHKTFD-LLPALK---DGHS-AENVSNN          | 1491        |
| TRICHOPLAX    | PDLLPIRF-DRDNELNIDFERLTFLIKGYQLLTMGI-LKTPA---D---HKDLIEK             | 1471        |
| STONYCORAL    | FDQLPFPL-SNPQEHQVDCRLRAYLVQGYQLLHCAGL-LLPALK---AQARNASEEYAVK         | 1513        |
| STARFISH      | TKLLQSMF-GRDEGLTTHGKLIHLVKGYQLHQANL-LSAAT---G---HSGSSFAVK            | 1520        |
| LANCELET      | FSHLPEVS-AG--VAELDHVRLTLMVSGYQLLHNAGL-LLPA-L---G---TNSGKSLASE        | 1512        |
|               | *                                                                    |             |
| APHANOMYCESE  | IANDFAN-----MAIAE-----RKNNTSRPIRDQIARTAMQTAIEMGWLASFI                | 1368        |
| FLATWORM      | RCCQLAE-----S---AQTTQHPVLPQ---LIDAALTYAL-NDSAL                       | 1581        |
| STYLONCHIA    | IVEAWF-----DIDTPISNESARVLVKFLSKLEI-PNETL                             | 1498        |
| TRICHINELLA   | TVADVY-----FSKRIGLPPSKLGMVKQIFRVAALTS-AVDVL                          | 1486        |
| HETEROSTELIUM | MTSTLFDYLN-----EHVDNITPAHLIVYKEILVFILSTGHIQPSK                       | 1603        |
| GLOMUS        | YILAIWKKFN-----NLRDVSDDLWVELIRKLLSFALSLSK-YNGAI                      | 1579        |
| MOSS          | LILTVFG-----I---EQCPPSLQPIAEMVNLAMSLGV-NATFL                         | 1519        |
| TERMITE       | LFSALVE-----GQ-GDMKRTVVLQPAAFSYAESLLKFAFLNKN-EVTV                    | 1491        |
| SALPINGOECA   | LFAALFEY-----SHTSTPEPTNLAMAGLLADLALSLSV-PKSQ                         | 1494        |
| ROTIFER       | MSKLVF-----DLSQEETESQ-----TTEAKRKLFSCLCSINR-N---F                    | 1519        |
| SHRIMP        | LCGSIFKEQN---LSVS-----GISPHPSLKLFLYTVMQLAITLDP-KVKHH                 | 1509        |
| SCORPION      | MLSSVWE-----SCILE-TEIGCC-IPILNPSVLNFGKMLTVALKLDI-SSEDL               | 1519        |
| SPONGE        | LYTNALT-----IIRGISSSPGDGP-GYMPPLHKLGTGELLKLGLELSD-SVEPF              | 1538        |
| <b>HUMAN</b>  | <b>LLSLVY-----KGIAPGDERQC--LPSLDLSCQLASGLLELAFAGG-LCERL</b>          | <b>1528</b> |
| ESHARK        | LLSVVY-----KGIAPGDERKS--LPSIDVSSKQLADGLLQLSFSLGG-QCEE                | 1535        |
| LIMPET        | IYPQFFLGMNIPVSPFSGIYE-EKGKLLKIITLTPAASILGKSLDLDFKGL-KDNVL            | 1512        |
| LINGULA       | LLQTLF-----QAVSEEDQ---FRLECSPTLELSRKLLELACSMTD-KPAQI                 | 1536        |
| TRICHOPLAX    | IMKSVV-----DCFRGEMNGD--RTALSPAQQKVAEELDLAFELNE-TIDIF                 | 1517        |
| STONYCORAL    | LFTAVY-----DGVKPSLNVGLQ-TVILDPASQHLASKLLDLAYDLGL-QFNYL               | 1560        |
| STARFISH      | LFITVF-----DSLTTSDAEGKLLQANLTPLSVELAESLDDLAFLLGI-EAKML               | 1568        |
| LANCELET      | LVS AVF-----KSMVTRKD-GHPTAASLPPSFHQLTGGLLQLACQLHP-QGHDL              | 1559        |
| APHANOMYCESE  | LKSTDENYDLFAS-----TF-----DSSLHKSSIWLNVAVGFMSNIENYES                  | 1409        |
| FLATWORM      | LQPLVT-----LLTEHSAGLDLLNSYKPCLTAYFS                                  | 1611        |
| STYLONCHIA    | CEWLTKKHL-----LYQKSSDLLLSYIA                                         | 1521        |
| TRICHINELLA   | IKLLMNTESVRLA-----ECTSLCSTKGELLIANFSDEIALIIC                         | 1525        |
| HETEROSTELIUM | LEYLLPPIKVLTKSTTTTTTSSITDKQLEEEKRRQKQIEHQSNFYKTYHSELIEYIS            | 1663        |
| GLOMUS        | NQWLLSDIIGFPS-----DNSTFYQNGTIYQKQFSSVINEHMS                          | 1618        |
| MOSS          | VNLIMDEKSVGIS-----TNRKLTSGEVFYMFRDTIVHVQK                            | 1556        |
| TERMITE       | ICCKEQASIQNP-----ATHSSVLHGDYFFVTFRSAILEHML                           | 1529        |
| SALPINGOECA   | LAMLRDDTPTPQAGHSLSTML-----ASASKSATQTTTRGALFYDTRTVLAPYIA              | 1544        |
| ROTIFER       | LTKILQNYL-----EEQSANVTLSYFRAEIFTQCL                                  | 1549        |
| SHRIMP        | LLSWATNSDTSVSG-----TS-----GQEVKESHVLSILGPKLIPQFL                     | 1547        |
| SCORPION      | LKKLLDEQQLYVS-----NLKTKTRRGLIMFSTYQQELSLFAG                          | 1557        |
| SPONGE        | LLLVLSPAQSG-----AGASFAAQDGLLLYITYSGLINNKLL                           | 1575        |
| <b>HUMAN</b>  | <b>VSLLNPAVLSTA-----SL-----GSSQGSVIFSHGEYFYSLFSETINTELL</b>          | <b>1572</b> |
| ESHARK        | VSLLNNTMELSV-----LS-----GATQKNFITFSHGEYFYSLFSETINAELL                | 1579        |
| LIMPET        | ITALLNDMIQVK-----TPSVNLQHGAEFFLMFKSVICQYIA                           | 1550        |
| LINGULA       | LGAILSKTKTK-----NQNSSQNFYAMFQSTINLYLM                                | 1568        |
| TRICHOPLAX    | FRYLLDETPLYGD-----S-NSATATLGMTLYTFNSNINAFIA                          | 1555        |
| STONYCORAL    | MESIMEDSN-----DNPSSCGCTFYRIFQTSINGFFI                                | 1593        |
| STARFISH      | VSCLLDKTALFSG-----R---SSTSKGAVFYTFKTKLNGEMA                          | 1604        |
| LANCELET      | LDCVMNKTPLMTG-----GGKKSSTFQGMVFFSTFKSICQQLI                          | 1598        |

Supplementary Figure 4: CLUSTAL All phyla small

|               |                                                                    |             |
|---------------|--------------------------------------------------------------------|-------------|
| APHANOMYCESE  | CALNTFQRVLEANPKSSD-----GLAPYVNDFAKYALS-----                        | 1442        |
| FLATWORM      | ANCQSLLTILAASPLLKAATAPATAAAATLARLPALAAI LESLAAS----VKRTALSQKGC     | 1667        |
| STYLONCHIA    | ENWNHFKLNVGEYLI I KAKDEP-----SLYAVFIPILEKLSQ-----KTPN--            | 1562        |
| TRICHINELLA   | TNAELFLKHL----KEASRCQP-----DVVGRALFHTVSVVVH-----SSDLRKK--          | 1566        |
| HETEROSTELIUM | KNFESFSPLF----IDRIVQTN-----HIDTILNDICIYKQTIQFNNTTDKQSKKN--         | 1710        |
| GLOMUS        | RNFREFAKIF----FDNINDFTRDQMNIDI I KDILNLIDY LIS-----KKDTQQS--       | 1665        |
| MOSS          | FFYKDCRLI----LEAAAEKQ-----AARMLLIALLDSYLK-----PSEMGAS--            | 1596        |
| TERMITE       | ACFEHSVSCL----IKDISANN----VQWVISTVTEILQYYAK-----IRKSKHQ--          | 1571        |
| SALPINGOECA   | RHFVFAEQL----LPHVGDGR----VYRLV--HDAARALVTG-----DTEMRR--            | 1583        |
| ROTIFER       | NFYSDILDFL----FSKL--SSK-----FSKILQFLINFEVIAM-----DKHLRKT--         | 1590        |
| SHRIMP        | ESPDALSRC----VEMIREGR----FLPAMGFASALLTCLIR-----NADIRKK--           | 1589        |
| SCORPION      | INSKHFISL----MNNINKSK-----TTVLKILVGLD SIGK-----VKEFRYR--           | 1598        |
| SPONGE        | LHIKMAIDVL----LKNAKTHP-----QQVSVILNLLLEYVQK-----DFKINNNNN          | 1618        |
| <b>HUMAN</b>  | <b>KNLDLAVLEL----MQSSVDNT-----KMSAVLNGMLDQSF-----ERANQKH--</b>     | <b>1613</b> |
| ESHARK        | KSLKSAVTQL----MRSASENP-----KMVSTVLNGMLDQSF-----DHTVRKT--           | 1620        |
| LIMPET        | ENGRTIIPIL----TNQAKTHG-----RKVNSILGATVDYIAR-----DRTL RKK--         | 1591        |
| LINGULA       | KEAKYPIPEL----VNYASKES-----SVVSVLSLLEQISR-----DRQLRGG--            | 1609        |
| TRICHOPLAX    | KVSNRCLPMI----LDLAASKS-----FMISGILSGLDFILR-----DRGLRQS--           | 1596        |
| STONYCORAL    | ERANIHMANI----LMKAASSP-----FLVLSLLNGILDQVIR-----DKILRTR--          | 1634        |
| STARFISH      | VQAQKVIPLL----VREGKDV-----TVVSSVLNGLLDY LTS-----SREVRRT--          | 1645        |
| LANCELET      | KTCAESLPVL----LQQLTAE-----VWVGSILHGLLDHLAK-----DKTLRKK--           | 1639        |
|               |                                                                    |             |
| APHANOMYCESE  | -----TAAKQSSLLKILDQVFNNFQDV-K----S                                 | 1467        |
| FLATWORM      | ADDPKQLASQILAKWTLV--QQLWDYG--NDDCRFSVLGITNLLAVDAELVKS N--          | 1719        |
| STYLONCHIA    | ---YKILLRSVPENWNEQERTDFTEFE---VATSKVKIYTFIANACQVQLR--DRS--N        | 1612        |
| TRICHINELLA   | ---YGRELALQILQIFGQE--LLYWADVVSNETLKMWLKMLMKLILIDSKIT-----E         | 1616        |
| HETEROSTELIUM | ---DMKSIMIPFLIKISS---HLLKDV--GKTDDKENIIEFTKNLINIDTPTFFET---        | 1758        |
| GLOMUS        | ---VEFLIHLNSEFYFL--KSFVKI---CT--YDRHYLLKLVNGLFMLEPNLRRF--S         | 1712        |
| MOSS          | --ITKSSFMQEFLOHIEVL--APLCRAG--SSLTRLRFLDILHKLMLDGTGKDVV LNIK       | 1650        |
| TERMITE       | DSTTLCAFERSIVNHNWKL--SSFVEGN--SEQVYQ--LLGLVNLARIMPQDRGL---         | 1622        |
| SALPINGOECA   | ---YADEFFTAFLDGF LHV--RTWINSAGAGSETHVQGMRLVSAVVRGVRPETAQ--R        | 1635        |
| ROTIFER       | ---NGQKILKVFESWPKF--EPYWSFE--SQ--FKILMISLLTKCLMIESPQ-----S         | 1634        |
| SHRIMP        | ---YSVKVQSFLKHWP T LAAQ---AG--KTSLHQDVSLSLSSLFLIDREGT IKSH-C       | 1639        |
| SCORPION      | ---YGKDIINSIMCQWSRL--QQCLEES--CDIDLQNDIITLITKMF LIDSSFIKGN--V      | 1649        |
| SPONGE        | NKETVETLCTELISHWQDL--SLWVEDG--SKDLKSAAVTLLQKIIALKPKLLKS--A         | 1671        |
| <b>HUMAN</b>  | <b>---QGLKLATTILQHKKC--DSWWAKD--SPLETKMAVLALLAKILQIDSSVSFNT--S</b> | <b>1664</b> |
| ESHARK        | ---QGVLLVSAVL TNWTRL--ESWWSEN--SSAESKMAVLTLLSKVLQIDSSVSFSS--N      | 1671        |
| LIMPET        | ---EGPNVASTILSEWKKF--STWWTNN--APPELQNLAISSLTKVLLIDSRVTSHT--S       | 1642        |
| LINGULA       | ---EGKTVVDVVLSCWSQLQQLQW WAPD--SPQEVKMSALNLLRKMLLNGKVVSDP--T       | 1662        |
| TRICHOPLAX    | ---KGIHISKILSSWNSL--KCWWLTP--DAQDLLQISVNLNKCLTLDPPQFATQS--N        | 1647        |
| STONYCORAL    | ---NGSSFVAVLLNNWTSF--EIFWRTH--SAMD LRHSILMLKMKLIDPAKVTD C--N       | 1685        |
| STARFISH      | ---HGMSVHSAILTQWDIL--MGGLKKG--CSTDLQSFALLMLRKL LQIDAKFVSDT--T      | 1696        |
| LANCELET      | ---EGAALCDSLLQSWPKL--APWWEEG--ALQDSKSTALTLLRKILIDSQVSRDP--A        | 1690        |
|               |                                                                    |             |
| APHANOMYCESE  | LALF--DCAL-GIKQVLC DK-----SKAASLKVDAMHIIPHMLKFS-----               | 1505        |
| FLATWORM      | -----DQVFVLFVGV LNS-----RVNFDLIVNGLALLGYMCRNPS-----                | 1754        |
| STYLONCHIA    | HYAIFIDHLCCEKVS KYLKE-----RYPVHIKREVLNLVGM IYNLETQRENEF            | 1660        |
| TRICHINELLA   | WPEF--APMASAYFMLNDQ-----SLTLD FKNRMLSLLAGFCTFD-----                | 1655        |
| HETEROSTELIUM | KEGY--DFVYQLL INYLNR-----SNSLAFKNKALVLLPDLLLFPK-----               | 1797        |
| GLOMUS        | LEEF--QNLFRENYEAFLDK-----QIDLEFKNEALDLLPFYFKSDL-----               | 1752        |
| MOSS          | YSSF--DFITETFLSFLSCSSE DATNSRLGSSAAFTLR TSMRLLPFFFSANVD-----       | 1702        |
| TERMITE       | -ARC--EALQKWVITQLTSR-----DLQLHYKSRALDLLVCLAGPQ-----                | 1660        |
| SALPINGOECA   | HANF--EQVLEVYKRFL EDR-----AVDMTSKRVALQLLGPLCKGT-----               | 1674        |
| ROTIFER       | -PKN--EKVFQMYFEFLTDE-----KSM LNFKAKVLDLLHFFFTNSP-----              | 1672        |
| SHRIMP        | TSSR--SDMVVFYNGLLADA-----KVELQAKIKVLLKLPFFFTMG-----                | 1678        |
| SCORPION      | NYDS--NSIFFSFITLQKS-----EMSLEFKICVLDLLPFFLC-----                   | 1686        |
| SPONGE        | DVS--KPLVDMYTAMIGDE-----KLELNFKAVMIDLLPSFLLLS-----                 | 1710        |
| <b>HUMAN</b>  | <b>HGSF--PEVFTTYISLLADT-----KLDLHLKQAVTLLPFFTSLT-----</b>          | <b>1703</b> |
| ESHARK        | HEAF--AMVFHTYTTILTDS-----TLALNLSQAM ILLPFFAHL P-----               | 1710        |
| LIMPET        | HPSF--STIFEMYQTM LVDN-----KTNLAFKNKVL DLLPFFAMAQ-----              | 1681        |
| LINGULA       | HPSF--SCVFSMYQSM L TDT-----KSSLLFKCKVLDLLVFFAKLP-----              | 1701        |
| TRICHOPLAX    | DSSF--ETVFNFFLSL SGT-----STSLAFKKYVLDLLHFFLVSS-----                | 1686        |
| STONYCORAL    | RLTF--PSLFEMYL LYLKDK-----STTLAFKQVLELLPYFTKST-----                | 1724        |
| STARFISH      | HPVF--SSVLEAYSFMLTDA-----STSLTFKAQVMDV LFFFTSLP-----               | 1735        |
| LANCELET      | HPAF--QPVFTMYLDM L TDS-----RSTLPFKSQVLDLLPFFTVLP-----              | 1729        |
|               |                                                                    |             |
| : :           |                                                                    |             |

Supplementary Figure 4: CLUSTAL All phyla small

|               |                                                                   |             |
|---------------|-------------------------------------------------------------------|-------------|
| APHANOMYCESE  | PDCTEIMTEGIAHLVVHDFPVNSNDITK-GTVAFDAFEMLFQSYLFLVVKSSQIVLLKTL      | 1564        |
| FLATWORM      | TERAERLSSQLKLLCSETVLMRCSNQLGINSHAYCQYVRAFRGLLLAQETSEHPLLEIL       | 1814        |
| STYLONCHIA    | VHDKNINFSLRTLQSQFFPIKTRRELVR-NSNVYNNFHIIVEGFLSLLILSKNLKVLRLMI     | 1719        |
| TRICHINELLA   | -RHACELGRSLKLFMVNNFPLKSDFAK-GTAKYDQHVAAACQKILFAFGCTGSPILLELL      | 1713        |
| HETEROSTELIUM | HHNYNLIQEKLINELVVYDFPLSSKDLTK-GSPIYNEYITTIERFLNTLEITCNPMIIDTL     | 1856        |
| GLOMUS        | --PKEKIESCIEFILYQQLPTDSKDYSKFGTKKLNLYSLVDKMFKAMVRSRVSFLFKIL       | 1810        |
| MOSS          | SGVHSKLIRILSGIVTDYLLVREADIPIQ-GSIQRSNYTQLLNQLLAAVSVSHSLELLEVI     | 1761        |
| TERMITE       | EDTNQELRSALQTLREQHFPQLSTELHS-GSVGYSGFVNAFRKILRGLLESGSCVILLSV      | 1719        |
| SALPINGOECA   | QHVRTCAASLNAFQCAFPPLRSREYAV-DSTQHREYIAALDDILDALVLSGSLELLEVV       | 1733        |
| ROTIFER       | ----KFKVLSQF-MSQLPLRSQDLAK-SDDIYKDYLVNVVHKLVLVCLLESQNLDMLSLL      | 1725        |
| SHRIMP        | EDIAKSVSEALEMLSLNHFPLHSTEFSE-GGARDREYHQAIICEILTALELSLSPILLQFV     | 1737        |
| SCORPION      | DAFLCKVQAALNDLFTNHFPYLSSELKP-GSSQYNDYHLAFTKLLIALELTGNEMLLKFV      | 1745        |
| SPONGE        | PHQSQKLGSLNRLVSLQFPLTSSSELPA-GGPLLNEYTNIIEKLCNSLVASGSVLVLELI      | 1769        |
| <b>HUMAN</b>  | <b>GGSEELRRVLEQLIVAHFPMQSRFPP-GTPRFNNYVDCMKKFLDALELSQSPMLLELM</b> | <b>1762</b> |
| ESHARK        | EENLAVLRHALDQFVAAHFPMKSDDFPK-GTLKYNVYVDAIKLLDALELSQSPMLKLM        | 1769        |
| LIMPET        | ETYITKLLKSSLDRFVADNFPKSNFETK-GSPRYQDYISAINKILLALELSGCSMLLELL      | 1740        |
| LINGULA       | EKETQQLKACLDRIVADHFPLRSSYAV-GSPKYQEYIMALSKILSALELSGSLMLLELL       | 1760        |
| TRICHOPLAX    | DKRIRRELREHLDRMIVDKFPLKSAEFVV-GSPDYNDYVACIDKLLANLIKSGNMLLEVL      | 1745        |
| STONYCORAL    | EEYLRLRKEGLNAFVTNNIPLKSTEFVVT-GGPQYNDYVQITDKLLAAFVNSRSLILLEVL     | 1783        |
| STARFISH      | DGEQTKLRALSADRLVADNFPNLSSEFRV-GSPKYIDYAGALNKILTAMVLSGNMLLEIV      | 1794        |
| LANCELET      | QTQLAELKARLDRMVADNFPPLKSAEFPA-GSSKYNDYVGVAVTKLLSALELSLMLLELL      | 1788        |
|               | : : . : . . : : :                                                 |             |
| APHANOMYCESE  | FQSLKEKK-SHAFYSAIQDALESFALEVPMCRIYPICVELLQLLDFDG-----             | 1611        |
| FLATWORM      | SILVCKER-QHALEAEFQQCLNRLLLRIPIQ----RCRDFVTWPWRLFRGDS---GGGG       | 1865        |
| STYLONCHIA    | YNSMREWK--TTYEPSLKRTLKIIIEQSINK---MPLHQFKQTFSQMFDEFMNRQIDLS       | 1773        |
| TRICHINELLA   | LSMVCREQ-SHPIASDLKHQLQKFSRRANSA----VLENILELDDKMFN---P--SC         | 1762        |
| HETEROSTELIUM | LQVLKEQD--HSHITHINQSIERFIVRTNDS---QAKEVFSHCFAMFMS-----ND-         | 1902        |
| GLOMUS        | IPFPCRES--DHMYGEEFQRQVSEFLSKLSRS----KYVDTMDIAYGYFTN-----ST-       | 1857        |
| MOSS          | FPLVQTPN--KISSRAVSEAVEVFAESLEDN----REAFNLCCTMIMD-----RG-          | 1806        |
| TERMITE       | VAMAASES-QHVLEDQIQKSLQIFIKRLEDK----QQVKAIEAVFKVFD-----DQ-         | 1766        |
| SALPINGOECA   | VTVHQREDRTHVHEDHIIQRKLRDFIVQEHTD----APQAIELMFQIYLA-----ET-        | 1780        |
| ROTIFER       | IGVYCREK-EHLCENQFRESLERFIKRLSSE----KQMEIVKQNSWNSFQS-----SDD       | 1773        |
| SHRIMP        | VNLFPCRED-KHRYEEVMHESLEKFMKKLPLL----KQQETLKHIDYMYND-----PTC       | 1785        |
| SCORPION      | IQIMCRES--THLLEENIQKCLKKLCRTPSDN----KERLIAEVPLKMPLE-----DEL       | 1793        |
| SPONGE        | INIMCREV-RHVCEEKIQTSLHQFISKLESD----GVDALKFVYEMFKN-----DKD         | 1816        |
| <b>HUMAN</b>  | <b>TEVLCREQ-QHVMEELFQSSFRRIARRGSCV----TQVGLLESVYEMFRK-----DDP</b> | <b>1810</b> |
| ESHARK        | IAILCRDS-RHVMEEGFQVCFQRLAKTGSCD----KQVALLEAVYGMFEN-----EGG        | 1817        |
| LIMPET        | ISIFCRES-KHVEEDEIQDVIARYTKRLVIY----KQKLALDIPYKIFTS-----SGS        | 1788        |
| LINGULA       | ISIMCREK-NHVEEDRMQESLVTFIRRLPTG----HQAALDVPFNIFTK-----EGL         | 1808        |
| TRICHOPLAX    | ISVMCREK-KHAYEEQIQKSLLLFISLIPK----DALGALDVPFKMFVD-----DKS         | 1793        |
| STONYCORAL    | IAIFCRER-QHVHEDQIQQSFIAFIQRLHPEP--DQAKAAMDVCLSIFFN-----ERD        | 1833        |
| STARFISH      | ISIMCRDE-KHAYEDEIQESLAAFIKRLEPEE----KQTAAFGVAYQIFCQ-----ENS       | 1842        |
| LANCELET      | ISVMCREA-KHVMEDDIQTSLSRFIKMGAD----RQKPALDIPYGIFFR-----EGS         | 1836        |
|               | . .                                                               |             |
| APHANOMYCESE  | LDDYIRTVLHRQVFSRLVHQLEEAIIKLFMTMTSFGVPFVKY---LMNIVL-----          | 1659        |
| FLATWORM      | FTGFHREQLVSRVLAPLLTQCHGSVLLDFVAT-----DDCLEYCLTCLLNAQQSLAGFN       | 1919        |
| STYLONCHIA    | VDDNLRWAIMKIIILKILESCSQEFLADIMIE-----FTPQ---LEIVLKEIFL--QK        | 1822        |
| TRICHINELLA   | VCASLRLLALLNEFFIPFLHSLKNDLLLTWTCR-----KIQT--LVSCLETSLTL--EI       | 1811        |
| HETEROSTELIUM | YQDELKITLIDKFCVPLIGHMKQQVLIQLFAQ-----HLSS---LMSIIQPLAPKYLAT       | 1953        |
| GLOMUS        | YVS-FQRIIIEMILSPPLLQGPKIFVMDFFKK-----HINE---IIDLLERDKYT--RN       | 1905        |
| MOSS          | KSYELRRRAVVEVIFEAFVNSSSMFVTVWYSQ-----HISD---LFYVLKQSSSM--LS       | 1855        |
| TERMITE       | YDPSVRLGCAQRVFRPPLLQGCRRSAAREFYRH-----CIQD---LQGMNLVTLDC--RG      | 1815        |
| SALPINGOECA   | NPLFVRRGVAQRVLATFLQACKLSMCSAFYIK-----RLPA---IMSLMSQDTPL--TS       | 1829        |
| ROTIFER       | ---ERKFLLFKVFIFIFLKNCDKPVFIDFMSA-----NIVS---LIEVLN---WN--LN       | 1816        |
| SHRIMP        | IKQNLRYNIMDLVLTPLLQQAQAVPTQNFLLT-----VISA---VMAGMSAPVHG--RS       | 1834        |
| SCORPION      | YPSDMRIHIIIEKVFRVILGMISKITLKYFFID-----HIKE---IMQIVKSKRKS---       | 1840        |
| SPONGE        | FPVAAVKIGERLCVPLFTECSSAVLLEFFVL-----KISD---VMCIMEAKLAR--VT        | 1865        |
| <b>HUMAN</b>  | <b>RLSFTRQSFVDRSLLTLWHCSLDALREFFST-----IVVD---AIDVLKSRFTK--LN</b> | <b>1859</b> |
| ESHARK        | LSNIARQSVMDRSLTLTHCSLDALKEFISK-----IKD---AMGILQSRFTK--TS          | 1866        |
| LIMPET        | YPSAIRIAALSrvclpmlrlvkhksaviefflt-----HISF---IMSEIEAKLVK--GS      | 1837        |
| LINGULA       | FPNEIRRSVTLRVCVPLRLCHQSSLSEFYVD-----HIKF---ITDTLSAKLSK--SS        | 1857        |
| TRICHOPLAX    | YRPDIRRAAIERVCLPMLQKASLKITKDFYVS-----HIKE---IMDIETKLVK--TA        | 1842        |
| STONYCORAL    | YQTHSRRAVIERICITFLKLTSTTARRAFYQD-----QIQK---LMSVLEAKELK--PT       | 1882        |
| STARFISH      | FSKELIRRAAIERVICPLMRLAGVKALSSFFKE-----CIKN---IGGIIDAKTIK--AP      | 1891        |
| LANCELET      | FPNEIRRSALERVCLPMLRLVHPAALTEFFTD-----HIRE---IMDIIGAPQTK--AG       | 1885        |
|               | .                                                                 |             |

Supplementary Figure 4: CLUSTAL All phyla small

|               |                                                                    |             |
|---------------|--------------------------------------------------------------------|-------------|
| APHANOMYCESE  | --NDQSPL-ISLVMFAGSLELLYSCLSGDAIR----HSVNPVYA----DAP-AKGNEL-T       | 1706        |
| FLATWORM      | ESETEEIL-LLARGCCRVLSCFYMACGLTELALPRLCDAFKRFYSRQPAAQKDPDRSL-S       | 1977        |
| STYLONCHIA    | DPLEQYQLIKQKKWIFLVEVMFRRLKPETIR----QVHKKLY----GES-SPGNEL-T         | 1872        |
| TRICHINELLA   | QTDCEQQL-ITKIGCYKICAIIYNELDLLECLK----NEVNVSYL---GSDS-QMKNEL-I      | 1861        |
| HETEROSTELIUM | AIERKSSV-VEKICCFKLQQFYESLPATVIR----DQVNPYFT---GDKHDAKGTTEL-T       | 2004        |
| GLOMUS        | VDEKIYYL-NERAGSLTLLQILYLRASEEDVYSEK-GEIVKAYC---QSRP-LKAKEL-T       | 1958        |
| MOSS          | AEREFEDL-FKKICHYELELLYSKADNVSIT---KTIAPVFT-----SSDL-M              | 1899        |
| TERMITE       | QLQTEHQL-VGRIGAWNILEPLFVHLESSELESKE-CVITAAAF---PGAV-KTGKEL-I       | 1868        |
| SALPINGOECA   | T---PAI-VIKMCTFTLIDILFQRLNNTDLYGKS-AVINKTYCEAAGEPV-NDKGSNLT        | 1882        |
| ROTIFER       | EPAFEMMC-LNKKCVFQILYELAYKRLHKDEIFFTN-AKICMAYETIKFGCV-KDGKEL-T      | 1872        |
| SHRIMP        | D-EQHKTLL-VTKVGSFMILQIMYSKLPREKLFAPG-SEINAAFR---PGD--QSGKEL-T      | 1885        |
| SCORPION      | --SNEIQL-VSKIGAFQLEIILYTYLSKEEVS-KE-SQINCSY-----GKEL-T             | 1883        |
| SPONGE        | DPKLEQQL-VHKSCCFQFIEILYTRLPSLISSEME-STVNTAYC---NGSP-QTGKEL-T       | 1918        |
| <b>HUMAN</b>  | <b>ESTFDTQI-TKKMGYYKILDVMSRLPKDDVHAKE-SKINQVFH---GSCI-TEGNEL-T</b> | <b>1912</b> |
| ESHARK        | ESSFDNQL-TRKIGCYKLEVTYIRLPKDDIYSED-SKINRAFH---SSN-MEGNKLLS         | 1920        |
| LIMPET        | KAELNQL-TTKIGCFQMLLELLYSRLTKDEVNSKN-SVINEKYC---QTKV-ETGKEM-T       | 1890        |
| LINGULA       | ESEIERLL-TLKLCCFELVEVMYSFPKEEVNSKN-SKINLKYC---GGKV-ETGKEM-T        | 1910        |
| TRICHOPLAX    | --DLENQL-ISKLSYKLMKLMYSKLSKQDVNTAE-SSIVKAYT---GRPT-EDGKEI-T        | 1893        |
| STONYCORAL    | DPNFESQV-TSKLCCFKLVEILYSQFSKSELNLTLE-STINKAYV---GGDV-KTGKEL-T      | 1935        |
| STARFISH      | ETVFQNL-VSKTCCFQVELMY SRLVKEDLFSMD-SAINKAYT----NDV-KTGKEM-T        | 1943        |
| LANCELET      | EASLRTQL-TNKLCCFQLETTY SRLPKEEVNTTPP-SRIVRAYK---GEEV-KAGNEM-T      | 1938        |
|               | : : :                                                              |             |
| APHANOMYCESE  | MRL---CKAASQKSAN-----PENSCAVAAAYRCLLVTVRKT                         | 1739        |
| FLATWORM      | NWVSVQCYDLVTQSF-----P--RCRESARQMCEAYNLLVHCIAKAA                    | 2017        |
| STYLONCHIA    | KSLIQLCTLAKKAPIDGFVNFVKDSIKSEFPQYN--SPLQVQRQYACAAYTCLTAIIMGT       | 1930        |
| TRICHINELLA   | KKLVSCAVGAKKEFCR-----DSKLDISIQQHFFEYRCAQNCVIALVKKT                 | 1906        |
| HETEROSTELIUM | AAIMKAAHLAKSEKLA-----TDEQHVTRVLATKYHGAAYSALASVVAAT                 | 2049        |
| GLOMUS        | KKVMEKAHKIKSRADK-----DDNGNKL--SEANLHFRCEAYNALAAVILCT               | 2004        |
| MOSS          | RQAGDTCHGKLDPEYK-----LYPEN--LSTWRELHAAAYNCLAAVILCT                 | 1942        |
| TERMITE       | SDLTSRAYKYRSETLH-----DNLTGNVQL--VELFRSQCAAFNTLVAIISNV              | 1915        |
| SALPINGOECA   | T---NTCRALRDVTV-----GEESL--VELRRQASCAAYNALTVICT                    | 1921        |
| ROTIFER       | KEVLRKSRKHMEYVNFN-----TGQESAKIEAN--KDLERILHCSAYNCLISLFIPT          | 1923        |
| SHRIMP        | KEIFRYAAKISKGELR-----HDQTH--AELRRLCACAAYNNAI IAVLACV               | 1928        |
| SCORPION      | REATGFAIAARKENLE-----GESIS--KEFCRKYCCAAYNNAI IAIICCT               | 1926        |
| SPONGE        | QAITKCCCHGAKSEDLH-----GDRTH--YETRRQYHCHAYNTLMSVISCT                | 1961        |
| <b>HUMAN</b>  | <b>KTLIKLCYDAFTENMA-----GENQL--LERRRLYHCAAYNCAISVICCV</b>          | <b>1955</b> |
| ESHARK        | KSLKLCYDAFTENMT-----GEKQL--LEKRRQYHCAAYNCIMAVVTCI                  | 1963        |
| LIMPET        | QKATKCAHEARSEDTR-----GETEL--VELRRQYHCTAYNLMISISICT                 | 1933        |
| LINGULA       | TAVTKAAHEAKKEDVR-----GEKRL--PELRRQYHCAAYNALMAIITCT                 | 1953        |
| TRICHOPLAX    | KSITKAAHACKSDDLRL-----GETRS--VELHRQCCCAAYNALISVISST                | 1936        |
| STONYCORAL    | LAI TKAAARAASIEDMR-----GETVA--LELRRQFHCAAYNALVALICCT               | 1978        |
| STARFISH      | QALTKACHAAKSEDIR-----GETNA--LELRRQFHCAAFNALIAIISCT                 | 1986        |
| LANCELET      | TAITKFGHAAKSEDLR-----GETGL--LDLRRRFHCAAYNALIAIISCT                 | 1981        |
|               | * :                                                                |             |
| APHANOMYCESE  | QTQEKFYTQLLFADQ-----IWPKIVDQSQDYIFE-TETTSFPTKYLSDARKRTQLR-         | 1790        |
| FLATWORM      | SDKERSYLP-PFTENAARKRF-IFDNIVPTDVDYQLP-LQVEQSASRKQYLVSVRPAAS        | 2074        |
| STYLONCHIA    | QTKENLFSQFLFATLDRKGEECFWNVLIDQEKAYNFE-VETNPNYIQLKQIEFKIEQAN-       | 1988        |
| TRICHINELLA   | QSHLKHYEGLIFND-----CWESIIDEVKYEFD-REIQEEEQSAGKMYYSRQDRPS           | 1957        |
| HETEROSTELIUM | QTKETTFHVVFVKENKEKNEY-LWENIIDLEQQYNFE-PETNFQISS-----QLSS           | 2098        |
| GLOMUS        | QNNPVFYKAFLEAENTSGEL-LWENIIDLEIHYKIK-IELNQPFRTKVD-DFRSRSRK         | 2061        |
| MOSS          | QIDEKWFNAFLFSEK---SRP-LWQHVLVDTKVYDDMSVETSQSSIIISQTVKGMRADLKA      | 1998        |
| TERMITE       | KCELRFFTGLLFSENKAK-EV-PWGKLVNCKEYALA-LDWEIIPARRKQLVSRQARA          | 1972        |
| SALPINGOECA   | QTQEKFYSAFCFKEATGKVRD-CVFNLIDEKRYTFT-TELPAAMSVRSKCVLALREGEA        | 1979        |
| ROTIFER       | QTEPKLYLAFLEKDDPSKNEF-VFEPKIDIKSYNFC-VEFENFTQRKTKFISIRDEFKV        | 1981        |
| SHRIMP        | QNDLRFYTNFLFSANPTKGEV-IWECLVDCSRNLEFD-VEINFKPAKRRFVAVRQKLE         | 1986        |
| SCORPION      | QTDKSFYSTFLFQENFAKGEY-IWENIIDLNKEYTFP-IELDT-IERRRKFISVRHENRE       | 1983        |
| SPONGE        | QSKPQFVVGFLFKEDVVKQL-LWDNIIDCEKKEYEQ-VDFEAPLKRKQITSIRDDLKQ         | 2019        |
| <b>HUMAN</b>  | <b>FNELKFYQGFLFSEKPEKNLL-IFENLIDLKRRYNFP-VEVEVPMERKKYIEIRKEARE</b> | <b>2013</b> |
| ESHARK        | FTEAKFYQGFLFSEKAENIF-IFENLIEAHRTYNFP-VEIEVPLEKRRFISIRKEARE         | 2021        |
| LIMPET        | FTEAKFYNCFLFSEKPSKQF-LLDNILDEKMFEPK-AELDSPLERKRRFVSIRNEVE          | 1991        |
| LINGULA       | QTEMKFYTGLLFKEDLAGDGF-LLDNIVDQNRKYLFE-IEITSLPQRKRRFVSIRSEAGA       | 2011        |
| TRICHOPLAX    | QTEMKFYTVFLFTENVARQF-LWENLIDMERYAFE-IELSYQDKQKTTFRSLREQSR          | 1994        |
| STONYCORAL    | QTDLKFYVAFLESENPIKQQL-LLDNLVDCNRTYTFE-VELSAPLERKRRKQFRMQRIPSP      | 2036        |
| STARFISH      | QTDIKFYNAFLFSENTAKGQF-LLDNIIDITKNYSFE-IEMNAPMERKRRFVSIRNQIQD       | 2044        |
| LANCELET      | QTDMKFYTAFLFQENTAKGQF-LLDNLVDTNKLYQFD-AEFSAPVSRKQFVSIRQELRG        | 2039        |
|               | : * : :                                                            |             |

Supplementary Figure 4: CLUSTAL All phyla small

|               |                                                                |             |
|---------------|----------------------------------------------------------------|-------------|
| APHANOMYCESE  | -----QFQRM DISSQFLAGSSLSQSSE----                               | 1812        |
| FLATWORM      | ASDSSASEAGPTDDL SWLNPPSSSSTS AVAAGTNSLQFA--ASQFLADSSLSDDVS---- | 2127        |
| STYLONCHIA    | --G-GD-----QIKANNL INEYNEKFNSA                                 | 2011        |
| TRICHINELLA   | SAE-----YENQV--ELSVLLDSSLSVMAT----                             | 1980        |
| HETEROSTELIUM | AVA-----NSQSRDLKYL--SSQYLQDSSLSQSLD----                        | 2126        |
| GLOMUS        | TFK-----EAI VSNLNKYL--ASQYLADSSV TQGGA----                     | 2090        |
| MOSS          | RRTRG-----KGSLSQTASTI--SSQYMHSASLSQEP A----                    | 2029        |
| TERMITE       | QRR-----ETLGFASQSVRYIPASQYLFDS TLNEDVT----                     | 2005        |
| SALPINGOECA   | TPS-----TTAAATAAARRYL--PSQILADSSLSQDAA----                     | 2010        |
| ROTIFER       | IKA-DTNSR-----SAN--YISTMHSTSSL--STQNL YSSSLSEELS----           | 2018        |
| SHRIMP        | TAR-EEGA-----VVA-GTVQYM--ASHYLSDS SLSREDMS----                 | 2017        |
| SCORPION      | LNS-NKTLN-----FA-----SSLKYA--PSQYLS DSSLSDDVS----              | 2014        |
| SPONGE        | STAAGNSSG-----SPS--SSPSTRPRYI--SSQYLS DSSLSSTDVS----           | 2056        |
| <b>HUMAN</b>  | <b>AAN-GDSDG-----PSYMS--SLSYLADSTLSEEMS----</b>                | <b>2041</b> |
| ESHARK        | AGD-GDSGE-----PQYLS--SQSYMADSS LSEEMS----                      | 2049        |
| LIMPET        | TRQ-GEEEE-----SL-----FSSYNI--STQNI EESSLSDDL N----             | 2022        |
| LINGULA       | QGD-GNSQD-----SAES-----SVHYL--ASQYLADSS LSEEDVS----            | 2043        |
| TRICHOPLAX    | SVS-SESAD-----EADSGIAMAP--SYHL--SSQYLADSS LNEEIS----           | 2031        |
| STONYCORAL    | -----KEN-----SLEESAGRTGLSIHYM--YSQYLADSS LSEDIS----            | 2070        |
| STARFISH      | TVA-GSSSQ-----QSDSGIEMSGYTGRYL--STQYLANSS LSEDIQ----           | 2083        |
| LANCELET      | QDS-P-----EAG-----SSRY--MQSYLAGSS LSEDIS----                   | 2065        |

:

|               |                                                               |             |
|---------------|---------------------------------------------------------------|-------------|
| APHANOMYCESE  | -----GEQLS-----SNPTSEET                                       | 1825        |
| FLATWORM      | -QFDRLVTADLSNTSDSASLATA SLS---LSTSSSFAINQRRSRKNR--FHNQTLTATRR | 2181        |
| STYLONCHIA    | MVFETQPKIN- IKSEEEKLQKLLNN---KKQ-----NTNQDQ NMLDKSAADEDSEIQ   | 2060        |
| TRICHINELLA   | -QDFFTESLEARTH C-A-----ET-RTESANDKDV MK                       | 2009        |
| HETEROSTELIUM | -VDTSSSTTST-S-----TTTTSNNNL KIVASA                            | 2153        |
| GLOMUS        | -LFKELPDESE-GESKNEH-----SDTIPMEI DERNENK                      | 2122        |
| MOSS          | -VIRTFVGGIRKEETS AAGV-----GAG---LLLDEESPSTETNIETAEQEEI I      | 2074        |
| TERMITE       | -LFDFTSVVVS-TEARPGH-----DEK-----TPKESGAES                     | 2034        |
| SALPINGOECA   | -QLEALRQGADVGESQAVEDASSSSSPSSDGP TFGLDMDASEDSPGAPSNI--PVYVV   | 2067        |
| ROTIFER       | -VDFFSVHSSY-NQ--AYN-----S-----QSSVTRAP SFRRSYTDELNSQE         | 2057        |
| SHRIMP        | -QDFDNNSVVL-AMST E-----SSE-----RVTGANEMGG---VL                | 2049        |
| SCORPION      | -QDFDSSSELA-FSQDMKN-----KNR-----KEEIDSNP SNEAKDDDLVSN         | 2054        |
| SPONGE        | -QYDFTLPHHH-QYGSVGG-----GAST---ESSIDEDSGNSQEA SSV--V          | 2097        |
| <b>HUMAN</b>  | <b>-QDFDSTGVQS-YSYS D-----P-----RPATGRFRRREQRDP-TVHD</b>      | <b>2078</b> |
| ESHARK        | -QDFDSTGVQS-FSYNS D-----P-----RGHAVRSR RKEQAE LSVVQS          | 2087        |
| LIMPET        | -QYDFNSGTAQ-VFFSDIF-----SDL-----TSSSNVQP DQFN TTV             | 2057        |
| LINGULA       | -AYDYSGLSQG-ERSEPV P-----P-----RTRQR--AVSEEA VPAEA            | 2078        |
| TRICHOPLAX    | -QDFDNSSVTQ-GYSENN S-----IKQIPT-----RETGDSEKAKTI INKF         | 2070        |
| STONYCORAL    | -QCFDSSPIQV-HSGTEAR-----QPLYKLN ESSSTA---EQTDDWYEV--          | 2109        |
| STARFISH      | -QDFDFSGGVQO-FNASIDK-----DQSLSQRSSVPH I KKRY SNEETPTVVVQG     | 2129        |
| LANCELET      | -QDFDTSGTQV-KHSQTF S-----STQERYSQASQGS S RLQARQQDSSVNIHG      | 2112        |

S2056

|               |                                                                        |             |
|---------------|------------------------------------------------------------------------|-------------|
| APHANOMYCESE  | EDEVLELDILNMHPCMIPLMQTIKHMETLFHSQW-----SN--TAMPGWIEKVVFN L             | 1875        |
| FLATWORM      | NLIVLES DSVNDHPCMATMVALLRHMKAFKLIPQ---LPEGVKP--TQMPKWMQNLQKV           | 2236        |
| STYLONCHIA    | DVSQLELDNVNKHCEMKNIKRCIDKMSL FFKREW-----DQNT--NEMPKFMQNL CLEI          | 2112        |
| TRICHINELLA   | FYSKTKLDDLQHPCMQAMVNVINYMDHMG MIPY-----EAGTLP AWMASMRD FL              | 2060        |
| HETEROSTELIUM | MNMP IELDKINSNPSMQMLKIIDIYQERFRESI-----DQSP--NDMPKWMNELYLKV            | 2205        |
| GLOMUS        | SKLELEIDVFN SHPCMKMIIRVIDRLH SQLTKPV-----DPVESMPGWMNDIYK KF            | 2173        |
| MOSS          | ETTALDRDDFDQHCEMPVILRLAEHVHVKFGA-----NYQP--GVMPDWMKSLHATL              | 2124        |
| TERMITE       | TEVILESDDLNMHECMATLCGVIEHMVDQGISPTDA---ETKD--AALP P WESMRKCL           | 2089        |
| SALPINGOECA   | EDSQEMDELNSHESMVS LMGLIQRIQAVHAESKPQRNEDGLILPSSTMP SWM SNLLKSF         | 2127        |
| ROTIFER       | QSVEI ELDELNQHE SMDNLISL FQSLVKNITPI---YDNGQLP--SEMP P WMTFVHKKI       | 2112        |
| SHRIMP        | MPVHMDQSDYNGHEVMANLTAVINHMVDAEIMVL---HKGDTVPKATDVPQWMTLVQQKL           | 2106        |
| SCORPION      | ITVELEIDDLNQHECMNSL TMLVQHMEKIQLL-----SSSP--KEIPKWL DNLCKKL            | 2104        |
| SPONGE        | SEEQLEEDDLNIHECM TPLMKLLDHMIINKITPA---PSGD--S--PEMP P WMTPLHKRM        | 2150        |
| <b>HUMAN</b>  | <b>DVLELEMDDELNRHECMAPLTALVKHMHRSLGPPQ---GEEDSVP--RDL P SWMKFLHGKL</b> | <b>2133</b> |
| ESHARK        | DIMELEMDDELNQHECM PAMIALINHMQRN NITPQ---VEEGKTP--QELP P WMKFLHGKL      | 2142        |
| LIMPET        | DYIELEDELNQHECMATMV ALIKHLHT--VITP---VLKGTIP--KEMPTWMSYFSEKM           | 2110        |
| LINGULA       | DYEEIEMDELNQHECM TALLKHMQRNKITPD---VVS--NP--LDV P P WMKYLRDKM          | 2131        |
| TRICHOPLAX    | ADELELDLNLKHECM EALLTLLDHMAVNKINPA---IEKDTTP--SEMP SWMVALRKA           | 2125        |
| STONYCORAL    | SEDTLEMDDLNRHESMAK MISLLKHLVDKKISPE---QVKDVPP--TDM P AWMAPLHKKI        | 2164        |
| STARFISH      | EYIEMESDALNQHECMASLTAVLKHMQANKITPE---IPEGSKA--SEMPGW MASLQKKL          | 2184        |
| LANCELET      | DFLEIEMDELNQHECMSSSAVLQHMARN NITPQ---VQKGAAP--KDM P P WMSCLNKKL        | 2167        |

. . : : \* :

: \* : :

Supplementary Figure 4: CLUSTAL All phyla small

|               |                                                                      |             |
|---------------|----------------------------------------------------------------------|-------------|
| APHANOMYCESE  | SS-----HSSTATRIFLCKLVVNRPGIFEPYAAKFVGPVIVELIVEV-----                 | 1916        |
| FLATWORM      | SN-----SSTDSHPNVRIFLMKLLINQCQDIFQPYAHFWLRPMCQFALS---DR-----          | 2281        |
| STYLONCHIA    | KR-----PDIHLNFKIFILKILINHPQLFSAYAKEWFEPYIANYLCD-----KN-----          | 2155        |
| TRICHINELLA   | NF-----GSINVRFLFIARIIVQCFHFVRFPFYLEWISPIIKLIVM---DE-----             | 2101        |
| HETEROSTELIUM | KN-----DTNLHPNILIFILKVIINRQQYFYRYHKQWTPILIEYVIS---NQ-----            | 2249        |
| GLOMUS        | TNIGNENKENDTHINIRLFIAKIIVNVPEAFEKYASLWIRPVIKLIIE---GR-----           | 2223        |
| MOSS          | DN-----AATHINVRFLAKVITKTRKIFAPHAADWIRPYVQTILIDPRK-----               | 2169        |
| TERMITE       | SD-----YSQPRNIRLFLKLIILNVESEKHPYAHHMNSILKAITD---G-----               | 2131        |
| SALPINGOECA   | ES-----TSTSHNVRLFIAKLITNMPDAFQWSSRWLRPIMLLILKFQDE-----               | 2172        |
| ROTIFER       | LD-----VYTHENIKLFIARAIANTESIFKPYCKFWYSALIGFLVNSSLC-----              | 2157        |
| SHRIMP        | DS-----ADTPRNVKLFLLRVMNNARIIFEPYAAHFVSTILTCLVD---G-----              | 2148        |
| SCORPION      | ED-----YSVHRNIKLFITKLFINNAEIFKPYAVFLLQPLINLILN---A-----              | 2146        |
| SPONGE        | TD-----SRTGRNIKLFIVRLITNRPKIFQPYAKHWLPVLTQFILSGDSTAGMGGAVG           | 2203        |
| <b>HUMAN</b>  | <b>GN-----PIVPLNIRLFLAKLIVNTEEVFRPYAKHWLSPLLQLAAS---EN-----</b>      | <b>2176</b> |
| ESHARK        | GN-----SSIPLNIRLFIAKLIVNSEVFRPYAKEWLGPLLQLVVS---GN-----              | 2185        |
| LIMPET        | TN-----PATSFNIKLFARLIFNTSEVFPQYTKFWLRPLCQLIFS---GP-----              | 2153        |
| LINGULA       | ND-----TTHINVKLFIAKLILNAEVEFAPYAKFWLGPLVQLMVR---D-----               | 2173        |
| TRICHOPLAX    | SD-----HTTNRNIKLFIAKLIINRPKIFRPYAKFWLVPLIQLIVE---G-----              | 2167        |
| STONYCORAL    | AS-----SSTHLNIRLFIAKLILINEAKIFEAHAKFWFNPLMELILQIKDTEP-----           | 2211        |
| STARFISH      | TS-----QSTHVNIKLFARLIINNNEVFTPYARFWLSGLLQLLIS---GN-----              | 2227        |
| LANCELET      | GG-----SSTHKNVKLFLAKLIVNNEEVFRPYARFWLSPLMEMIVR---GE-----             | 2210        |
|               | : * : : : *                                                          |             |
| APHANOMYCESE  | PKLDEFHYILRDIICHLVVDTWHLETIDYD-----LSQFVKHLIAVSPNTSAAIL              | 1965        |
| FLATWORM      | NGGQGFHTLLVDIVYFV--SWGTAIPEDD---LGDRLDVERLLDKLTGLCYDKERRIF           | 2336        |
| STYLONCHIA    | NGGKGFHYFMRDLCTLLI--AWN--IPEDN---TKNRLCTNVVNTLIKYSADTKMIF            | 2208        |
| TRICHINELLA   | FGSNILHYFRVDLIVVLF--EWTAKLKEDE---AIPKDSLNDLLKFCVKHCWSKSGKVF          | 2155        |
| HETEROSTELIUM | TGGQGIHYFIRDIAMLL--SWPNYQDQKLDQLDLSKSNISKFINFLIQNSYCADRQIL           | 2308        |
| GLOMUS        | SYGEGINYFIQDLCAIVT--VWGSFITLE--S---YQDKVLIYELMEFLMKNSYNESRIVI        | 2277        |
| MOSS          | SGGLKFHYMLRDICTVIL--QNVVASADG-----RLATNFVHHLISVADHGNSQVL             | 2219        |
| TERMITE       | VVGRAPNYLLSDTVAMLA--DWCRKTTSLPA---KSDHHLVSQQLYLLISKVHHDRRDVF         | 2186        |
| SALPINGOECA   | PETPGFNYFVTDLCLLL--TWADTAVPQDD---SE--KRLARQLVQFLMENARHETTAVF         | 2226        |
| ROTIFER       | RDLAQMDCFITLDMVMML--SWGSIQKPDQS---E--AKLINRFLITLLIKRCYHENRAVL        | 2210        |
| SHRIMP        | TIGDKINYFFCDVMVMVM--GWGSKAVPQDT---VMGRNIVGRVLRYLCMNTPQTRADIF         | 2203        |
| SCORPION      | TFGREINYFILDLMVVL--SWSSIAIPEDS---SIGRHAASGLEFLMSKCFHIRKDFV           | 2201        |
| SPONGE        | GGENGLDYFTVDAIATML--SWSSTAIIED-----RFLGSQLEIYMLRSNHKNRSIL            | 2254        |
| <b>HUMAN</b>  | <b>NGGEGIHYMVVEIVATIL--SWTGLATPTGV---PKDEVLANRLLNFLMKHVFHFKRAVF</b>  | <b>2231</b> |
| ESHARK        | NGGDGIHYMVVEIVVTVL--SWTSVATPKGN---MKDEILANRLEFLMKNSFHEKTAVF          | 2240        |
| LIMPET        | LSSDGINYNVDLIVMM--SWHTTSIPQDT---AEERAMSSRLVQFLMANIYHKNKQIY           | 2208        |
| LINGULA       | MPDEGLNYVVDIMVTVL--SWSSVAVPQDT---AMDRAMASRLVEFVVRNVNHDTRQIF          | 2228        |
| TRICHOPLAX    | KESDGIHYFIVDLMIILL--SWADVAIPKDV---DE--ILQANRLEFLMRNAFYPNRSIF         | 2221        |
| STONYCORAL    | AGTEGINYNFIVDLVVTLL--SWSTAIIPEDS---HNDRHASRLGFLMSRTRHRHRSLF          | 2266        |
| STARFISH      | TGGEGIHYMVVDVVVVL--GWVTVAIPEDK---RL---ANRLEFLMHFCHHSNRQVL            | 2278        |
| LANCELET      | ASGEGINYFIVDLLVTML--SWGVAIPEDS---AMGRALTSRLLHFLMANAFHKTRAVM          | 2265        |
|               | . : . . * . . :                                                      |             |
| APHANOMYCESE  | RDNLYLIESFLFRYPSQC--RFLNGDAIMDMIGGDG--N---DKLDTARHVAGMQIVAMLL        | 2019        |
| FLATWORM      | KNNWRLLDALIRSWRSRV--HCVPYKRIFDQLQ--Q-----TEEYTAAGLQLYNAYL            | 2386        |
| STYLONCHIA    | NTNIEIAGLLHRWKKLV--AINKDVISMIMIGMD--K---KPESNLWKMTGIQILALAV          | 2261        |
| TRICHINELLA   | KRNLRIETMLVLWKSFV--TLDPSLILEKICFPL-----GNE--NENVCGISILCLCL           | 2205        |
| HETEROSTELIUM | RNNLNILKLFVERWGLF--SVEKKSIVEALATPV--TNFKSKAR--QVRSTALIQLSILL         | 2363        |
| GLOMUS        | RNNILIIKAIFEIWSELI--VVPTHVHELFSDSV-----GNV--DKVYTGQLLGVVL            | 2327        |
| MOSS          | RANIDIIRLFLENWKGSI--SLERQQLQYLSISGRNPDMDNRNIKMKRLVGLQLLGAV           | 2277        |
| TERMITE       | KHNLELIRTVVELWKNPF--DIPVQLLYDMIM--K--H---DRKDPTVSEPGIQVAAIIL         | 2237        |
| SALPINGOECA   | KNNVNIIRLLERWKDAVQDKVPFKVIVDNMS--S--R---QMAS--KDNLSGLHLLSLIL         | 2278        |
| ROTIFER       | KNNIELIKTMTECWDRMI--QVPVELINNFLT--S--N---DH---RKLSTGIQLFGVVL         | 2258        |
| SHRIMP        | KYNLDVVRVVECWKSL--TVPYTVIYSLME--V--K---DGAE--REVEAGLQLLGIIL          | 2253        |
| SCORPION      | RNNLEMIKTVVQCWKERL--DIPYIIFESMR--N--L---DTKV--KDNIVGIQLFGIVV         | 2251        |
| SPONGE        | RNNLEIVRTMVELWKDKI--DIPTRVLYDQFS--N--S---DKST--VSNLSGIQLVGIAV        | 2304        |
| <b>HUMAN</b>  | <b>RHNLEIIKTLVECWKDC--SIPYRILIFEKFS--G--K---DPNS--KDNVSGIQLLGIVM</b> | <b>2281</b> |
| ESHARK        | RHNLEIIKTVVECWKDC--SVPYSLIFSRFS--S--T---DPNS--KDNVSGIQLLGIIV         | 2290        |
| LIMPET        | RNNLEMLKTVLECWHDRI--EIPYKIYYNQLK--S--E-----ENKSVGIQLLGVVI            | 2254        |
| LINGULA       | RNNLELLKTLVECWKGRF--DMPYKIYYNFS--D--R---DPKS--KTNTAGVQMGVFL          | 2278        |
| TRICHOPLAX    | RNNIEIIKTAVELWKNHI--EIPYRIYYKNS--N--P---DKDK--KDNSTGIQCLGLVV         | 2271        |
| STONYCORAL    | RNNLEIVKSVVEIWKSI--HVPAAEVIFNFS--D--P---DPVK--KDNVSGIQLLGVVV         | 2316        |
| STARFISH      | RNNLEMIKTVECWKEII--SVPTSVIYRILA--T--P---DPDV--KDSSTGLQLLGIIV         | 2328        |
| LANCELET      | RNNLELIKTAVECWKTRV--EVPYTKVYHDLG--G--S---DASS--KANSVGIQLLGVVL        | 2315        |
|               | . * :: : : : : :                                                     |             |

Supplementary Figure 4: CLUSTAL All phyla small

|               |                                                                      |             |
|---------------|----------------------------------------------------------------------|-------------|
| APHANOMYCESE  | SLAFDATSPATSFE-----FLLR--NAR---AKLENNLLTRMV--SMHKTTPILAADI           | 2065        |
| FLATWORM      | SNALPYFNEQQGVNVGGVDS-----PQILAAALVRLLN--HSRKEVYSPCAGV                | 2431        |
| STYLOMCHIA    | SFDLIVIEKPENIGQTNVNRQREFRFQEQNENQLGDKLMNSLLKILE--SKKKQIQAASET        | 2320        |
| TRICHINELLA   | NTVPETFSFLTD-----PNYE-----SGIFSHLVRLLS--LKNVKLFKLAAFV                | 2246        |
| HETEROSTELIUM | SNGYAAAYDKEND---SEISE-----FKFYQLIDCLT--EYKELYDAASEI                  | 2404        |
| GLOMUS        | AHDKPLFQDEVGLDLGGLTS-----DKFYMDLTNNLLNHVNSNVRALAAEV                  | 2373        |
| MOSS          | GGIPIYDPSCD---FSTSE-----EHICEALLNLLN--VKTKEVYEAAL                    | 2319        |
| TERMITE       | ANRLEPWSST-----GK-----LQFLRALLRNID--TEKRSIFQSSAEV                    | 2274        |
| SALPINGOECA   | ANDMMPSESDVE--EAGLSM-----RSFFQLVANLM--FKRSRVYRTAAEV                  | 2321        |
| ROTIFER       | SNGIENYEYP---MDISR-----LDFFKSLINCIK--EPSKLIHAPAAEV                   | 2298        |
| SHRIMP        | ANGLPPYTVD---SETEK-----KRCESLVIRLLG--AHYASVYGAAAEV                   | 2293        |
| SCORPION      | SNGLDPYQNT---SRIDK-----ISYLKTLTVNLK--NKYKEIYESASEV                   | 2291        |
| SPONGE        | ANELNYPDTNTA---GSLDQ-----GLYYKIFVNNLT--FKYKLIYAAAEEV                 | 2346        |
| <b>HUMAN</b>  | <b>ANLPPYDPQ---CGIQS-----SEYFQALVNNMSFVRYKEVYAAAAEV</b>              | <b>2322</b> |
| ESHARK        | ANLSPYVVK---CEIGY-----ERYFQRLVYNI--SLTRYKEVYAAAAEV                   | 2331        |
| LIMPET        | TCKFPYVGPD---CPVDR-----HKFFTVAFLMC--DKSKPVYATGEV                     | 2294        |
| LINGULA       | ANGLPAYSYT---SEVDR-----EKFYKALASNMG--SYWKTSSAAAEEV                   | 2318        |
| TRICHOPLAX    | ANGLSPYRYDV---EVDE-----MLALAENLQ--FKYKEVYEAVAEV                      | 2308        |
| STONYCORAL    | ANGLFPVTS---STIDE-----DRFYGLTVNNLT--FKYKDVHAAAEEV                    | 2356        |
| STARFISH      | ANGLHPIDKA---SDIDE-----ERFYAALSYNLK--NRYKMVHAAAEEV                   | 2368        |
| LANCELET      | ANQLPPFPNSTS---GNIDR-----EQFFSAVAKNLQLTRYKDVYAAAAEV                  | 2358        |
|               | . : .                                                                |             |
| APHANOMYCESE  | AGLVLKHMHSTTF-----QTSVETQLALFFQ----EKPDRFLTVCVKQ---VSFHYP            | 2110        |
| FLATWORM      | TGLYLRQMVAQS--V-VPAFYKQVAEQLGKML-----TARPDAGLHALAQ---VSRCCP          | 2480        |
| STYLOMCHIA    | LKILNKQPSLVA-----QSIHPLMNN--EITERHDFVHVSIEK---ITREYP                 | 2363        |
| TRICHINELLA   | CGLSLKVLNELQT--D-----CEWLLKNMKAVMSRMTGTMGRSKCLFCLHE---ILPNYP         | 2297        |
| HETEROSTELIUM | CGMILQFNHKKHNI---QSVFEKLLKDKISSFLS----QSDYQRALNCLYF---IGLHHP         | 2453        |
| GLOMUS        | CGLAVKHLRKYHCSEALSLLNPLMKISGMYYQALSNESDMKNFLTIVH--ISMHDV             | 2430        |
| MOSS          | VGITMIYRKESRQ--VNEEILEAKLHKILKQLYR----EAAYERFLNINLN---ITIRHP         | 2370        |
| TERMITE       | AGMALELLAANGSGMLEGDDAEFLSGIVDKLNL---TKDQSKDKFLTCLFA---VQEEYP         | 2328        |
| SALPINGOECA   | TGMLLSHFKSKGRRLLELMNEVVVARLDQLKDD--DDATSKERLITCLHELNVNTGHP           | 2379        |
| ROTIFER       | VGMLLKRFDSDHK--EYFENTVS---HLFEILR-----EADTSLFITSIHK---IQLNYA         | 2345        |
| SHRIMP        | MGLLKYTSQKDG--SVEA--LEDAVVKRVTELT-----VKMQGQLTCLYIN---IHKHYP         | 2342        |
| SCORPION      | CGMSMKYFDPKDD--DVYSEFKIVKTEISSLN-----AKDQYLTCLYK---INTHFP            | 2339        |
| SPONGE        | LGMTMKRMAESYD--PFLDRLEEMVGEQLFKLSQ---PLEKSEDKFITCLHK---ITLCYN        | 2399        |
| <b>HUMAN</b>  | <b>LGLILRYVMERKN--ILEESLCELVAKQLKQHQ-----NTMEDKFIIVCLNK---VTKSFP</b> | <b>2372</b> |
| ESHARK        | LGLVLHYFAENEK--QVDGLVHDLIAKELKQLQ-----QSKEDKFIIVCLSK---IVKNYP        | 2381        |
| LIMPET        | VGMIKYLEVKEQ--ETEGEFHYYIINNISSLQ-----LSKPDNFICYIHK---IHQYYP          | 2344        |
| LINGULA       | VGMLQDLDQHDK--DFKEEYVNHLSVLSLQ-----QSNPDTYMLCVYK---MHLHK             | 2368        |
| TRICHOPLAX    | LGMIMKHLASVKK--ETEGPIFDYVTQHLSSMVS---AGRMDVARFILCLYR---VOLHYP        | 2361        |
| STONYCORAL    | IGLLMMQLAKVKK--IFDGPLHDMVGQKLSLVN---RAKPELDKFITCVHK---LKLNYP         | 2409        |
| STARFISH      | IGMAMKQKADVVK--VTDGFLHSIVTSELTKIS-----EIKPDVFVTCIHK---LHFHYP         | 2418        |
| LANCELET      | IGMTMKYMADVEK--VTEGSFHTQVERYLLPLQ-----VNQDVFVLTVCVHK---IHLHFP        | 2408        |
|               | * : . : :                                                            |             |
| APHANOMYCESE  | PIVD--ESTLNRMSIFPRIWQDITLLCTLDIVYSSNFQA-----AEIFR--FLRPH             | 2159        |
| FLATWORM      | RLAC--IEFRQRLLFQPLHGTGDSLA--D-CLVCLAAAATAAAVSDNCRWPNAAVELKERG        | 2537        |
| STYLOMCHIA    | ELLIDRKIFMKLLSFVKTLTGSMRA--S--ILKSFERFINVCRQRKKIEDINEIAMSLADS        | 2421        |
| TRICHINELLA   | EFAL--QFCNDLLDWFPSSLHGLDKT--A-CLEGFAVSKYK-----GDFFEELKSRG            | 2344        |
| HETEROSTELIUM | SFIL--QFQLKLLNILPQLSNEIRL--V-AFNVIYWIADDI-----PELFIKLKSAN            | 2500        |
| GLOMUS        | DVAV--RFLKYVFGILPRLN--KI-L-ALEIISFCAGHD-----PDLFTNLQRDR              | 2476        |
| MOSS          | GFLE--GYAEMVVDQLSRFLGAYKV--N-ALDTLRFPKAD-----ANLFPN--ISRS            | 2416        |
| TERMITE       | RIVD--AFMNHVLFHLPKTYGIFRT--M-CLKIVYSRLEILG-----DTYAEMKSEN            | 2376        |
| SALPINGOECA   | PVVD--HFVQRLLFLAPSLPGQFKT--M-ALETLLWRAEDI-----PDLFRELQKKG            | 2426        |
| ROTIFER       | AISE--RFMTKLVFFLPQLYGDFKK--M-CAESILSSIRVL-----QDPL--FKSEN            | 2390        |
| SHRIMP        | SFVK--RLINKLLNLPKLYGIHRK--N-VLECLIAHSATM-----EDIYHLHKEQN             | 2389        |
| SCORPION      | IFID--SSFLENKILYMLPNVHGIFRK--Q-ILEIINSHVENI-----ENAFIELKNOG          | 2387        |
| SPONGE        | KIVP--RFVEKLLFLLPSLQGVFRS--S-CLEILDTQADVQ-----POFYLLKLDKG            | 2446        |
| <b>HUMAN</b>  | <b>PLAD--RFNAVVFLLPKFHGVLKT--L-CLEVLCRVEGM-----TELYFQLKSKD</b>       | <b>2419</b> |
| ESHARK        | PFAD--RRFLNQVYFLLPKLHGVLKT--H-CLEVVMHRAETI-----IDIFQELKNKN           | 2429        |
| LIMPET        | PTAD--RLLNKLLFMLPNLNGESRR--L-CLEVHGRIGQI-----DNVFMELKTRG             | 2391        |
| LINGULA       | PIAE--RFMKNLLFMLPRLHGEYKR--H-CLEVISSRVQNM-----ENAFIELKKNKG           | 2415        |
| TRICHOPLAX    | IAD--RFVNVKLVFLMPSLYGEFKT--K-CLEIILARADHI-----KELYTELNRNG            | 2408        |
| STONYCORAL    | PIVD--RFVNQILFTLPSVHGDFKS--Y-CLEILCSRVEHI-----PNLFTELKGRG            | 2456        |
| STARFISH      | EFAD--HFTNKLFLMPLSLHGQPKT--L-CLEVVASRVSHI-----PNIFLEMKSKG            | 2465        |
| LANCELET      | PFAD--RFVSKLLFMLPKLHGIFRT--H-CLEVIIRGRVNI-----DNLFLLELKTRN           | 2455        |
|               | . : .                                                                |             |

Supplementary Figure 4: CLUSTAL All phyla small

|               |                                                                    |             |
|---------------|--------------------------------------------------------------------|-------------|
| APHANOMYCESE  | LPRLLRHNNPDVP-----LRLIDVMTKLPNLSLSED-----YQMV----                  | 2193        |
| FLATWORM      | FFDSLKRLFALSSGGASVSAESRVPQNSLALCERLLLLLQQERLADAEQAAIKQQRVW         | 2597        |
| STYLONCHIA    | EEILADISDENQQ-----SFLILITQIAKLNLDTG-----DKLMQR----                 | 2457        |
| TRICHINELLA   | FLKVFSLRYERDQ-----MLGMYIVKNLHANLTVL-----NISD----                   | 2378        |
| HETEROSTELIUM | LDSLIRIREEQTQ-----IIILKILFKLIKNNYTT-----DQTLQLQI----               | 2537        |
| GLOMUS        | LLGFLKHRDENEQ-----LLALRILAGILQEIEVS-----TFEY----                   | 2510        |
| MOSS          | LPKLLAHRDEIAQ-----LKLQLLSQLLKNVNDQ-----TIRTR----                   | 2451        |
| TERMITE       | LFKTSLDRDPDQ-----NLALSIVHKMVPHLKPE-----QLEE----                    | 2410        |
| SALPINGOECA   | LLSLIKHHHTETQ-----AVVLSILKVLVLLHHLNAS-----SIKQ----                 | 2460        |
| ROTIFER       | FIDMLTHRDTPIQ-----LICKMIHETLDKQTDL-----DLDR----                    | 2424        |
| SHRIMP        | LLDILAKKEASTQ-----LVALQLVNAVMPRLTPS-----QLLY----                   | 2423        |
| SCORPION      | LLNMLEHRDESIQ-----FSSLNIIQKLLKELDID-----KMLN----                   | 2421        |
| SPONGE        | FHTMISHRDEATQ-----TASLDSIVQKLLVQLTND-----QLSE----                  | 2480        |
| <b>HUMAN</b>  | <b>FVQVMRHRDDERQ-----KVCLDIIYKMPKLPV-----ELRE-----</b>             | <b>2453</b> |
| ESHARK        | FVQIMRSYSDEERQ-----RICLDIVYKIIAKLKAEL-----EVKV----                 | 2463        |
| LIMPET        | LLSFLTQRNEKTQ-----LVALNIIITSIREKLLKSK-----EMSS----                 | 2425        |
| LINGULA       | LLTMLTHRDDSTQ-----AVCLKIVNELLRRLQPD-----EVLV----                   | 2449        |
| TRICHOPLAX    | LKDMLLHRDESKQ-----QVSLDLVRAMLKNLDIS-----QILY----                   | 2442        |
| STONYCORAL    | LKEMLSQRDDGIQ-----IGVLRRIKHLMKKLTIP-----ELKF----                   | 2490        |
| STARFISH      | IVELLTHRDEGTQ-----LVSLKLVNAMLPNLKPD-----ELLY----                   | 2499        |
| LANCELET      | FLGLMLTHRDDGLQ-----AIVLQIVYALLQKLVKVE-----ELLY----                 | 2489        |
|               | : :                                                                |             |
| APHANOMYCESE  | LLSGD-----CSVLFAPENESCQMKVLQFVISIDKL-S-----                        | 2225        |
| FLATWORM      | LLAAVGMCLASTGAGAGSVAALTLPAARRQAYQILATWYPTHP-----                   | 2641        |
| STYLONCHIA    | VLPRLL-----KQLFQHNKNDYSRGLFYDLMVYLYDQFENFK-----                    | 2493        |
| TRICHINELLA   | LVSS-----FSSVIGNFSPSCRRFAEMCCSLYTKLSSLND-----SSEN                  | 2418        |
| HETEROSTELIUM | INLLL-----DCRFNQSPNETCRLLYYDIFMWIHDYLEKDDVID-----                  | 2575        |
| GLOMUS        | YLDGL-----IESFQDHPNNDCCRRTYITLVKMYNKINGT-----                      | 2545        |
| MOSS          | VLPVL-----CDNFNGHENVDCCRREFYELIYLFKKNKGMK-----                     | 2487        |
| TERMITE       | LVHE-----ICKFETQRSVKCRSVMYELIKWYDHCQDIG-----                       | 2445        |
| SALPINGOECA   | FLPSV-----TANCCSHDDYTVRAIAYDILMAVYDQKLSHERGDVVLADDETA              | 2509        |
| ROTIFER       | LMPH-----LEKFIHHPHLSCRYQFVLLILISLEYIYQFKVN-----QIGS                | 2464        |
| SHRIMP        | FMPG-----VAFASHPAPSCRETMYDVLFWVYDNFSNND-----TED                    | 2461        |
| SCORPION      | VFPF-----ISKVHKSAEITCRKVMYELIMMHAYEKFNTPK-----GK                   | 2459        |
| SPONGE        | IVPIL-----IASFSKHGSIQCRIVLVNILMRVYNKLCITDDQSE-----SDDS             | 2523        |
| <b>HUMAN</b>  | <b>LLNP-----VVEFVSHPSTTCREQMYNILLMWIHDNYRDE-SE-----TDND</b>        | <b>2494</b> |
| ESHARK        | FLVP-----VIAFISHPSPVCRERMYDILMWIYDNYRDAE-SQ-----SDPD               | 2504        |
| LIMPET        | LMDS-----ITAFSHHPSTLCRKVMFELLMWYDNYREDE-----CTE                    | 2463        |
| LINGULA       | FLPA-----VTAFSSSPMPCRGLMYDILMWIYDNYRDEN-----NAT                    | 2487        |
| TRICHOPLAX    | LAEL-----VATFKTNPSAACRQKMYGIFMWIYDTFRQEIHK-----NDE                 | 2482        |
| STONYCORAL    | IFPL-----LTSFVSHPNLLCRDLMYDIFIWIYDSYRADEAFQ-----AEEG               | 2532        |
| STARFISH      | LLPP-----VRTVFNLPSACREVMYDILMWIYDNFRDEE-SR-----TEDG                | 2540        |
| LANCELET      | LLPS-----VAAFASHPAPECCRRRTMYDILMMWYDNYREEA-SQ-----QE-S             | 2529        |
|               | : :                                                                |             |
| APHANOMYCESE  | ----VPAVQLISLKALESSRIADVREAYEFWEK--QL-PSSCHDRLLALFGPLYHDQTT        | 2278        |
| FLATWORM      | ----NLCAPALLAGLTDSAESNRAWLLEFWSRNSGL-PSEASARWFALLSRCHGNNTAD        | 2695        |
| STYLONCHIA    | ----PLVKSALIRGLSDKTKVVRNKLISFWSDSRRL-GLDPNQRLLQIMNDLYTQEEEN        | 2547        |
| TRICHINELLA   | SKAALATTKMHLTMLS DNSKSI RQLVYNFWCDASRL-EISTSARLLNCLSQLYTCATES      | 2477        |
| HETEROSTELIUM | ----QNQIRLTLLIGLSDDSEAVKRKLEFWDTSKEL-SLSTVQRLMQLFEKMYTKETES        | 2630        |
| GLOMUS        | -VEIKHKLKINLLRGLIDTDESIQQALIEFWHAQEEL-SHNTFTKLLKELIGNLYSTES        | 2603        |
| MOSS          | ----ERLVIQSLLMGLCDSSDIVRASLQNFVHLQLS--QDVRHRFLELVNRIYDPCLEE        | 2540        |
| TERMITE       | -GVLIEEAKGILLKGLRDDPHLQDSIFEYWNDAQQRDASTSDRLLFILTLDLYCPATEH        | 2504        |
| SALPINGOECA   | LTEIAQLARTHLLLGLQDSSPKLRQSIVAYWDQEKRL-ARNPVQRFYDGLTSLYVPEAEE       | 2568        |
| ROTIFER       | TSQILLNFSKENLLKALIDEEDTSIRVMAQNFWTEKADM-PSNTIDRMLLIVEKLYSPKTER     | 2523        |
| SHRIMP        | GHQLESQARGVLLRAVKEEDAALRQIVLNFWLQGARS-MTLT-QCLLHILRKMYSPESED       | 2519        |
| SCORPION      | EKEISRYAKEMLLHGLADSDLTLRLTVHNFWSQNNHL-PAETFSRKAVLQKMYSPIEH         | 2518        |
| SPONGE        | VKMIRSISRQDLLGLGDESNEVKLKMYYEYWNQESNL-SSNTLDRLTQLLVTLYSKKTET       | 2582        |
| <b>HUMAN</b>  | <b>SQEIFKLAQDVLIQGLIDENPGLQLIRNFWSHETRL-PSNTLDRLLA-LNSLYSPKIEV</b> | <b>2552</b> |
| ESHARK        | SKAVFVTTKDTLLQGLTDDNPALQLYVRNFVGHENRL-PGTGTHDRMLAIRSMYSNKIET       | 2563        |
| LIMPET        | GHEIMLKTKCELLKGLGDEDMCRLLVQNFVSSDTRL-PGTGLDRMVAMLEAMYSPSETQ        | 2522        |
| LINGULA       | VHQIMSRTKDALLNGMSDKDLGLRLRVMNFWSHESRL-PAGTLERMVAMLEAMYSPSVES       | 2546        |
| TRICHOPLAX    | TKQLINFCKDQLLQGLNDSSEENRLQLLNFWSNNRRL-PSGTLERLSSVLYALYSPNAES       | 2541        |
| STONYCORAL    | SADILADAKDHLLQGLADDHRDLQLKLRNFWSDEARL-PGTTLERLVEVLRALYSTTTEI       | 2591        |
| STARFISH      | ADDILCMARDTLQGLSDEEASHRLRVSNFWSHETRL-PGTGLERLVMLECMYSPGTEH         | 2599        |
| LANCELET      | AGRVLGTAKDCLLQGLSDEESYLRLLVQNFWSHETRL-PGTGLERLVMLECMHSPRTEP        | 2588        |
|               | : : . : *                                                          |             |

Supplementary Figure 4: CLUSTAL All phyla small

|               |                                                              |                                 |             |
|---------------|--------------------------------------------------------------|---------------------------------|-------------|
| APHANOMYCESE  | DW-----                                                      | -----VKYAPKLWLSLQASSDN          | 2298        |
| FLATWORM      | EDSNRDEEFSAS-----                                            | -----TGAVLPAFCSAVQLDACSSTPDF    | 2730        |
| STYLONCHIA    | IW-----                                                      | -----LNNSVFLLMQICSQSSDF         | 2567        |
| TRICHINELLA   | TF-----                                                      | -----LSHASYVMLELTCHSPDY         | 2497        |
| HETEROSTELIUM | QW-----                                                      | -----LYCCSLLQLCTRSSDF           | 2650        |
| GLOMUS        | LF-----                                                      | -----LNYACYLLEGSKKSIEY          | 2623        |
| MOSS          | NW-----                                                      | -----AQISNVLLKLCEDSVDY          | 2560        |
| TERMITE       | IF-----                                                      | -----LGYSTQYLEATAGTPDY          | 2524        |
| SALPINGOECA   | AY-----                                                      | -----LQFVTNVMLQLTKHSPDY         | 2588        |
| ROTIFER       | EF-----                                                      | -----LSYSTNLLLEKTSKSPDY         | 2543        |
| SHRIMP        | SF-----                                                      | -----LQMAIYVLEATHRSADY          | 2539        |
| SCORPION      | MFS-SDECFPLYISLIVDNFWSNEKRLPLGTVERLIALMKNMLQYSTFLLMEMTSKSPDY |                                 | 2577        |
| SPONGE        | QF-----                                                      | -----LYHATNLLLELTSRSPDY         | 2602        |
| <b>HUMAN</b>  | <b>HF-----</b>                                               | <b>-----LSLATNFFLEMTSMSPDY</b>  | <b>2572</b> |
| ESHARK        | QY-----                                                      | -----LSIATNLLLEMTSRSPDY         | 2583        |
| LIMPET        | QY-----                                                      | -----LSYATNLLLEMTTKSPDY         | 2542        |
| LINGULA       | SY-----                                                      | -----LSYATNFILEMTSKSPDY         | 2566        |
| TRICHOPLAX    | EF-----                                                      | -----LSYSTNLLLELTSRSPDY         | 2561        |
| STONYCORAL    | QY-----                                                      | -----LSYTTNLLLHLSLSPDY          | 2611        |
| STARFISH      | QY-----                                                      | -----LSYASSLLEMTSKSPDY          | 2619        |
| LANCELET      | QY-----                                                      | -----LSYCTNLLLEMTSRSPDF         | 2608        |
|               |                                                              | : : :                           |             |
| APHANOMYCESE  | KQFLFSEPLSSSANFEQLA-IDTS--WEHRTQNILTPLFSD-----               | -----AQALQSQS---                | 2345        |
| FLATWORM      | RRPMFDRPLADCPFR-ECR-IDAD--WRRRHGGLMTPLFLET-----              | -----QOQQQQQKASD                | 2779        |
| STYLONCHIA    | NRKIFDAPLQDCKFQ-PL-INOFGHQLNRSQPL-TPLLSQMDQIFQASQMQAKDQQLGV  |                                 | 2624        |
| TRICHINELLA   | TRLIYDHPLEDCTFE-NLP-ISTH--WQSRYASLEVPAYMQT-----              | -----DMHSEVSKFIS                | 2546        |
| HETEROSTELIUM | TKLLFDKPLSECTFR-EYN-LDAS--WQNRTSNM-NPLFSSS-----              | -----QLDEESSQLPT                | 2698        |
| GLOMUS        | NKPIFDQQLPQSRFDENYDDIDTS--WRVNN-TM-TPLFINT-----              | -----QTSKQKGNL--                | 2670        |
| MOSS          | KRPIFSAPLSECVFQ-DYT-INTS--WVGASLPM-TPLFSSS-----              | -----QMSMDIQGMHG                | 2608        |
| TERMITE       | NQKIFKEPLQKQCFE-DFR-MLLS--WRAQNATV-APMFADT-----              | -----LASQLIQTS-                 | 2571        |
| SALPINGOECA   | DRELFARPLSSSTWR-NYR-VDAS--WRQRNAHM-TPLFAAT-----              | -----QSQASAGEGE                 | 2636        |
| ROTIFER       | NRLIYENPLSECIFR-EYN-LSAD--WRRRHEIM-TPLFAET-----              | -----VTNTFTES---                | 2588        |
| SHRIMP        | QRNIFDQPLTECKFR-EMK-VSTA--WRARHAM-IPMFAET-----               | -----QASNDTSLNSL                | 2587        |
| SCORPION      | NLKIYQNPSTCAFQ-NYA-ISSS--WKKRHATL-TPWVDS-----                | -----LSSAASFSDT-                | 2624        |
| SPONGE        | NRVLFDTPLSECRFE-DYKEIDLS--WQQRHLQM-TPLFAAT-----              | -----QLSQTSQSDTG-               | 2650        |
| <b>HUMAN</b>  | <b>PNPMFEHPLSECFEQ-EYT-IDSD--WRFSTVL-TPMFVET-----</b>        | <b>-----QASQGLQTRT</b>          | <b>2620</b> |
| ESHARK        | TREMFHEYPLSECKFQ-DYN-IDSS--WQQRSTIL-TPMFVET-----             | -----QATQNSRSQS                 | 2631        |
| LIMPET        | QREIFEHPLSECRFQ-EFS-VKSS--WKQRHAAM-TPLFAAT-----              | -----ISTVSESME-                 | 2588        |
| LINGULA       | NREIFEHPLDDCPFE-DFV-VRSS--WKQRHAAM-TPLFAET-----              | -----QFSLADGTQSG                | 2614        |
| TRICHOPLAX    | KLSIFDHPLESECKFH-DYN-VNYS--WQYRHAM-TPLFAAT-----              | -----QLGSGQSMAS-                | 2608        |
| STONYCORAL    | ERLMFEQPLSECRFE-EYQ-IDYS--WQRRHLAM-TPLFAAT-----              | -----QSGHSGGMTPT                | 2659        |
| STARFISH      | KREIFEHPLSECRFQ-DVT-IDHS--WKQRHLAISTPMFVET-----              | -----QSSQASSGS-Q                | 2667        |
| LANCELET      | SREIFQHPLSECRFQ-DVQ-IDHS--WKQRHVAM-TPMFVET-----              | -----QSSHPASSQSQ                | 2656        |
|               | : : * . : : * T2609                                          |                                 |             |
| APHANOMYCESE  | -----                                                        | -----AIFEGGFV                   | 2353        |
| FLATWORM      | VEP---GTLRQLQDGDG-----                                       | -----ATAAVAMGTDASMLPLRATAVGPGMF | 2819        |
| STYLONCHIA    | IKEVQENPNDENIAGDVTMIDTTVSNSNRNQRRPQIQASQIGSQSVVEISDTQAQDGNFV |                                 | 2684        |
| TRICHINELLA   | -----                                                        | -----RKRKMPYGR                  | 2555        |
| HETEROSTELIUM | F-----                                                       | -----DGDNFGP                    | 2706        |
| GLOMUS        | -----                                                        | -----KRQEGLV                    | 2677        |
| MOSS          | E-D-----                                                     | -----RD-----GEFDGATHHRPMMI      | 2626        |
| TERMITE       | -----                                                        | -----LSGTGEHTGAGPLL             | 2585        |
| SALPINGOECA   | -----                                                        | -----GEDEDFSGV                  | 2645        |
| ROTIFER       | -----                                                        | -----VDLRHNL                    | 2595        |
| SHRIMP        | LSY-----                                                     | -----TQ-----GSDTNMETDGPAGV      | 2606        |
| SCORPION      | -----                                                        | -----SVKNIDEQI                  | 2633        |
| SPONGE        | -----                                                        | -----SIGTGML                    | 2657        |
| <b>HUMAN</b>  | <b>-----QE-----</b>                                          | <b>-----GSL SAR-WPVAGQI</b>     | <b>2635</b> |
| ESHARK        | -----                                                        | -----QE-----GSLTAQ-GTIGGLV      | 2646        |
| LIMPET        | -----                                                        | -----GVEDSLDGGV                 | 2598        |
| LINGULA       | -----                                                        | -----SFDDSFVGV                  | 2623        |
| TRICHOPLAX    | -----                                                        | -----FSLSGSSSTDEHLL             | 2622        |
| STONYCORAL    | Q-----                                                       | -----ES-----MSVDGSP-----GL      | 2671        |
| STARFISH      | -----                                                        | -----S-----QSPPDSS-LSRGEI       | 2681        |
| LANCELET      | A-----                                                       | -----QS-----LSQGGQD-TLGGQL      | 2672        |

Supplementary Figure 4: CLUSTAL All phyla small

|               |                 |                |                 |               |              |             |             |
|---------------|-----------------|----------------|-----------------|---------------|--------------|-------------|-------------|
| APHANOMYCESE  | KATQ----        | DPIWSQ         | CAQH-----       | FTQSQV        | ESS-----     | APN         | 2380        |
| FLATWORM      | EATQ----        | LHPSAA         | TA-----         | GLL-ADS       | -----        | QD          | 2839        |
| STYLONCHIA    | RATQ----        | VPVFTQ         | QSDVSS          | LIA-----      | SNF-----     | YGNR        | 2717        |
| TRICHINELLA   | RTYST           | ESTAWP         | PGFTPT          | AIT-----      | DLKKNV       | GNISAD      | 2594        |
| HETEROSTELIUM | RATQ----        | LPMFSL         | QSSFSQ          | FYP           | SGSSSS       | SYSELSS     | 2743        |
| GLOMUS        | RATN----        | EDLAFSL        | LGP-----        | GN-----       | ADLGSQ       | -----       | 2704        |
| MOSS          | RATM----        | TPSLSQAV       | QT-----         | QGGT-----     | -----        | LSST        | 2649        |
| TERMITE       | RATQ----        | ASLAFQP        | TEQ-----        | SGSSIG        | SL-----      | PS          | 2610        |
| SALPINGOECA   | RATQ----        | ASLAFTP        | TMASLTG         | ---TAA-----   | TAATF--      | EPGGIS      | 2686        |
| ROTIFER       | RATQ----        | QTLQFP         | PL-----         | KVYDWL        | TQSSID       | TF-TDTA     | 2627        |
| SHRIMP        | QATQ----        | ANVFSAT        | QA-----         | PGATYN        | WVTD         | STFD        | 2648        |
| SCORPION      | RSTV----        | DVREFDP        | QD-----         | QASKKAF       | NWLT         | QTSID       | 2670        |
| SPONGE        | RATV----        | QQSLAF         | TPQ-----        | QESSYN        | WMTP         | SAQSV--     | 2699        |
| <b>HUMAN</b>  | <b>RATQ----</b> | <b>QQHDFTL</b> | <b>QOT-----</b> | <b>ADGRSS</b> | <b>FDWLT</b> | <b>TGSS</b> | <b>2672</b> |
| ESHARK        | RGTO----        | THYFTPT        | QON-----        | PDA-RNF       | NWLT         | TGNSL       | 2688        |
| LIMPET        | RATQ----        | DVQFTAP        | QD-----         | AGSNAP        | FNWLT        | TGSSL       | 2638        |
| LINGULA       | RATQ----        | EIQQFTPT       | Q-----          | AVKAPY        | NWLT         | TQSSL       | 2662        |
| TRICHOPLAX    | RATQ----        | STNLQFTPT      | QODT-----       | DARNWL        | DPSS         | VDKSI       | 2669        |
| STONYCORAL    | RATQ----        | NLQFTPT        | QD-----         | QRRSTAF       | DWLN         | NPTQES      | 2713        |
| STARFISH      | RATQ----        | DAHQFIAT       | QQLDAV          | ---ASRN       | KAYN         | WLTGS-Q     | 2724        |
| LANCELET      | RATQ----        | DVLQFTAP       | Q-----          | AAPKNAY       | NWLT         | TQSSL       | 2714        |
|               | . T2638         |                | *T2647          |               |              |             |             |

|               |              |              |            |              |               |             |             |
|---------------|--------------|--------------|------------|--------------|---------------|-------------|-------------|
| APHANOMYCESE  | S--S-----    | SHRRD-----   | ITAKRF     | TKHRGN-----  | EPGN-----     | 2403        |             |
| FLATWORM      | LSVST        | SLLFRSS      | GGGGG      | AGL---EV     | SAAAG-GL      | AGYHTA---   | 2885        |
| STYLONCHIA    | TDSIS        | ASFYE        | IINKFN     | KRPNQ---     | GQVNL         | RIGAQSS     | 2772        |
| TRICHINELLA   | SDSSD        | NLTV         | VILDK      | LQD-----     | IKKPK-----    | SSRVK       | 2625        |
| HETEROSTELIUM | SSATT        | STTF         | SVGS       | APDSS        | QSG-----      | KAGNK       | 2788        |
| GLOMUS        | SLTQ         | SNLL         | FQS        | FIPSL        | PRSD-----     | QGGT        | 2733        |
| MOSS          | QGVNG        | SVLY         | GLSQR-     | -----        | PGGAGY        | IKK-----    | 2679        |
| TERMITE       | FSLSS        | LLFT         | TGSS       | FENQR        | KS-----       | YKMG        | 2656        |
| SALPINGOECA   | TAAQ         | VLLF         | FERRR      | NRGANV       | -----         | SVDP        | 2723        |
| ROTIFER       | IDTK         | SLLF         | KTESK-     | -----        | -----         | NKDS-----   | 2645        |
| SHRIMP        | QGST         | SGLIF        | NVNG       | ASGQ         | KDRRR-----    | FKRPG       | 2692        |
| SCORPION      | SSTSS        | LLFT         | IGSD       | TKKIP        | PNID-----     | ENNRN---    | 2710        |
| SPONGE        | PTSD         | SLLF         | TRPT       | MRPPL        | KNP-----      | LRI         | 2742        |
| <b>HUMAN</b>  | <b>P-SSD</b> | <b>SLLFA</b> | <b>HKR</b> | <b>SERLQ</b> | <b>RAP---</b> | <b>LKSV</b> | <b>2720</b> |
| ESHARK        | P-GSS        | LLV          | FSR        | WSE          | RHRPA---      | KKP         | 2737        |
| LIMPET        | E-TP         | SLLF         | SVGT       | SGS          | QSTNKR-----   | QSKAG       | 2687        |
| LINGULA       | E-TQ         | SLLF         | NVGT       | ANENQ        | TPKK-KRY      | KKTG        | 2713        |
| TRICHOPLAX    | E-TS         | STLL         | FLSS       | KSPRQ---     | RPLQ          | MKPL        | 2717        |
| STONYCORAL    | Q-TQ         | SLLF         | STSQ       | SHKRRK       | -----         | MLKP        | 2762        |
| STARFISH      | S-DQ         | SLLF         | TLG        | ASKM         | GRGR          | QVSK        | 2778        |
| LANCELET      | E-TQ         | SLLF         | TTD        | ASKK         | VAKARRL---    | KPVG        | 2763        |

|               |              |              |              |              |              |            |             |
|---------------|--------------|--------------|--------------|--------------|--------------|------------|-------------|
| APHANOMYCESe  | -----        | -----        | -----        | -----        | -----        | QEN        | 2406        |
| FLATWORM      | -----        | -----        | -----        | -----        | -----        | QAAQL      | 2929        |
| STYLONCHIA    | ADLAK        | FFAQ         | NQYV         | YRPQ         | ESQ          | QGQR       | 2805        |
| TRICHINELLA   | -----        | -----        | -----        | -----        | -----        | LDGDL      | 2642        |
| HETEROSTELIUM | -----        | -----        | -----        | -----        | -----        | IDPRV      | 2810        |
| GLOMUS        | -----        | -----        | -----        | -----        | -----        | RSSEY      | 2752        |
| MOSS          | -----        | -----        | -----        | -----        | -----        | WMDPAL     | 2697        |
| TERMITE       | -----        | -----        | -----        | -----        | -----        | SDRLAP     | 2674        |
| SALPINGOECA   | -----        | -----        | -----        | -----        | -----        | EAREI      | 2743        |
| ROTIFER       | -----        | -----        | -----        | -----        | -----        | DEKEV      | 2664        |
| SHRIMP        | -----        | -----        | -----        | -----        | -----        | DTMQS      | 2712        |
| SCORPION      | -----        | -----        | -----        | -----        | -----        | SSNTF      | 2728        |
| SPONGE        | -----        | -----        | -----        | -----        | -----        | KRKQV      | 2760        |
| <b>HUMAN</b>  | <b>-----</b> | <b>-----</b> | <b>-----</b> | <b>-----</b> | <b>-----</b> | <b>GRD</b> | <b>2738</b> |
| ESHARK        | -----        | -----        | -----        | -----        | -----        | QRADIL     | 2755        |
| LIMPET        | -----        | -----        | -----        | -----        | -----        | KSDTV      | 2705        |
| LINGULA       | -----        | -----        | -----        | -----        | -----        | EKEEI      | 2731        |
| TRICHOPLAX    | -----        | -----        | -----        | -----        | -----        | PSSSL      | 2735        |
| STONYCORAL    | -----        | -----        | -----        | -----        | -----        | EKKEI      | 2780        |
| STARFISH      | -----        | -----        | -----        | -----        | -----        | EDKKI      | 2796        |
| LANCELET      | -----        | -----        | -----        | -----        | -----        | QQSEI      | 2781        |

Supplementary Figure 4: CLUSTAL All phyla small

|               |                                                                     |             |
|---------------|---------------------------------------------------------------------|-------------|
| APHANOMYCESE  | -RTKSYFQDQAS--RSKLEIARIKQAKSKGSKVSLYRAYRVGDFPDIQIPRMDIFRPLL         | 2463        |
| FLATWORM      | SSSYSAFAQAGV-ERHRRQAREAAEAAAKREHRVTLRRRYRVGDLPDVQMEQGALVTTLA        | 2988        |
| STYLONCHIA    | --MPAHLQKQEE-IRKMQREQLQRQIQKQHQVGLYRRYRVGELPDIQISYEDVLKPLQ          | 2862        |
| TRICHINELLA   | --EKAFFVNLNR-KRQKVIER-L-----KQQSLDLRGKYRRGDFPDIQIPYSAVIITLQ         | 2692        |
| HETEROSTELIUM | --RNAAFARLAV-KKSKDRDELMSRAKQARENQVTMFRKYRSGELPDIQIKLQELLRPLQ        | 2867        |
| GLOMUS        | -----DFKQMMATQRKQDEIYRTSQHAFPKNISMLRQYRVGELPDIGINHGDLINPLQ          | 2805        |
| MOSS          | --QSQVL--TGVFRRASRRREARLKLQSLERANKVHMMRQYRTGELPDVQIKHADIVGPLA       | 2753        |
| TERMITE       | --KRIFHASREI-QRSARQOELEQERGRLEANIASFREYRSGDFPDIETISYSAIIKPMQ        | 2731        |
| SALPINGOECA   | --QAAIFHAKRMAARKQEARRLIELRRKARAAQVTLFRSYRTGELPDIQIKQRELLQPLQ        | 2801        |
| ROTIFER       | --QSKFFARKQI-AKKNRDEDLRKQLKAKRENHVEKYRNYRIGDFPDIQIKHSELIAPMQ        | 2721        |
| SHRIMP        | --QSIYFAKIEE-RRSKLREKLEKERKFRREAQVTMYRQYRVGELPDVQIPHRALIGPLQ        | 2769        |
| SCORPION      | --SRLHFIRMEM-RKQQLRQEREKEQKKQREGQVTIYRQYRIGDLPDIETINYSSIIVPLQ       | 2785        |
| SPONGE        | --VSSFFAMNEA-RKKMRREELKQRRARQSVVVMYRKYRMGELPDIQIKHSELIIRPLQ         | 2817        |
| <b>HUMAN</b>  | <b>--LSLMYARKGV-AEQKREKEIKSELKMKQDAQVVLRYRSHRGDLPDIQIKHSSLITPLQ</b> | <b>2795</b> |
| ESHARK        | --VSLIFARKGI-REQRAEQKIKTEKRMERDAKVTLYRSYRFGDLPDIQIKYSLLIAPLQ        | 2812        |
| LIMPET        | ---RLFFMKKNV-RLRKREBERLMEQKSRRENQVTMYRKYRTGDLPDIQIKHSYIIAPLQ        | 2761        |
| LINGULA       | --RSTYFAKNI-RLQAMRQEALKEQKLRREAQVTMYRKYRTGDLPDIQIKYSYVIAPLQ         | 2788        |
| TRICHOPLAX    | --NNAFYAKRER-RKKQLREEILKQKRIARENKVVMYRKYRDRGELPDIQIKHSELIAPMQ       | 2792        |
| STONYCORAL    | --ISAFFAKQAL-KRNKFRQALQRQKAAREGAVVMYRKYRSGDLPDIQIKYSELIAPLQ         | 2837        |
| STARFISH      | --SQAYFARREM-KRKQLKEKILEEQREKRFSTVTMYRKYRTGDLPDIQIKYSDLIAPLQ        | 2853        |
| LANCELET      | --TKAYHARRQI-RMQKMRERVKEQRAKRGNLVTLYRQYRVGDLPDIQIKYSYIIAPLQ         | 2838        |
|               | : ** *::** : : . :                                                  |             |
| APHANOMYCESE  | AVVASHTATATSLFSIILSTVLPNLSASTQSQVIT-----KIEALLQ-----                | 2505        |
| FLATWORM      | GLAQKDRMFGRLCAQLSQSMVDWAASALSSEDDVADMCRRLLAAAWLGVLIPTSPFDGKRR       | 3048        |
| STYLONCHIA    | AITKSDLTIATEVFVEIFSELYKSNQDQ-----QRELLGQGVNRNLLN-----               | 2905        |
| TRICHINELLA   | AVAEldrVfAGALFESLMCGVAANVIEIYNFEMTEKYFDSISDGLRDI FR-----            | 2742        |
| HETEROSTELIUM | SLCQMDHHVGTSTVFSLLFTTIYQHCPRDQNE---KFKSSCKQSIEKIID-----             | 2913        |
| GLOMUS        | TLAQRDLDISRTLFTSLFVSIYNQLDNNIQVSEEIKEYKKTIGRHIQDIF S-----           | 2855        |
| MOSS          | ALAERDPTFARLLLRLILCSAVYSLPSG-----GQDIKAEVRLGLEAALR-----             | 2797        |
| TERMITE       | ELAKRDAVARHLFVLLFDGLLGEYLYDE----KEVYTKVQVKAMGSTVS-----              | 2776        |
| SALPINGOECA   | GLAQRDQPQLARMVFESLFYVGLHELPHDILSERDAANMKAEBYKAVNGLLQ-----           | 2851        |
| ROTIFER       | GLAQRDSQIAMVLFESIFVSI LSEISYLKDEQDSYKILKELTQYLNAMLA-----            | 2771        |
| SHRIMP        | ALSQRDEKVARLLFEVLAQGVINSAGTAMHHREQEWNQELHEALNGILS-----              | 2819        |
| SCORPION      | ALAQHDDEICRMLFQSLILSVCCYMKSNQV-TEYSEFCRSLSSALNEILK-----             | 2834        |
| SPONGE        | ALAQNDSGLARLLFCSLFN SIFSQLDHLLTEEDAATAATKGVIEGNINTILD-----          | 2867        |
| <b>HUMAN</b>  | <b>AVAQRDPIIAKQLFSSLFSGILKEMDKFRTLSEKNNITQKLLQDFNRF LN-----</b>     | <b>2845</b> |
| ESHARK        | ALAQKDHS LAKQLFSALFSGILEVHKS KTA-ETKDISKQLVENFNLYLK-----            | 2861        |
| LIMPET        | ALAHRDSTIAKLLFSSLFKAIYKMKDEVKTEREMEETIELINTSVETM FN-----            | 2811        |
| LINGULA       | ALAQRDNTLAKMLFSALFRAIFSELQVKTERTETEMMAQISRSLNAMLD-----              | 2838        |
| TRICHOPLAX    | ALAQVCYLDQNYRYVNL S---VNDLVENFNDEDAAEKAEIKASLSNIVK-----             | 2839        |
| STONYCORAL    | ALAQCDNTFAKQLFSALFRGIFSKIDEKLPEREAA SVTSDLRSAMNHMLS-----            | 2887        |
| STARFISH      | ALAQRDASLARLLFSSLFRGIFSEIEEVKTEREAESTKVEINRHLNMTLS-----             | 2903        |
| LANCELET      | ALAQRDSMLARLLFSSLFRGIFEEIENVKTEREAEDLTEQISRFLNTALS-----             | 2888        |
|               | : :                                                                 |             |
| APHANOMYCESE  | -----QS-QHNTFFVASLHQAYLSLLRHP--S-----TLLLA--PDIVGISS                | 2542        |
| FLATWORM      | NGLSAVTAATNDPALIGCALDSL C---AVASSACDGGVGVVDVGAIIRPSDYGLVAAAA        | 3105        |
| STYLONCHIA    | -----ESILYDYGCINCIHRVAM---ELLKTD-----GFTIE---ANIIQRTG               | 2942        |
| TRICHINELLA   | -----SMVTFHRPLVSCLMNFLY---NFI--E-----YVHFE---PTDIANVA               | 2777        |
| HETEROSTELIUM | -----SNAT-NSALILSLLKIVE---KNL-----ELTPS---PASIASAS                  | 2946        |
| GLOMUS        | -----NSTMNFPPF IGSLRICY---EVN-----DIEID---PNMIRKAC                  | 2889        |
| MOSS          | -----QT-HNGISFVGC AEALCL---EDP-----EIWIS---PKIMGSAS                 | 2830        |
| TERMITE       | -----TTKDYTTMVMGAVMEIAL---CHS--R-----YITLQ---AEDITTVS               | 2811        |
| SALPINGOECA   | -----ATRKGYPPIAALHNL MR---ASD-----PAIVS---PMTVSLTS                  | 2885        |
| ROTIFER       | -----SSEFNSNFIACILEICI---KNP--K-----LLKLD---PGLVTSAC                | 2806        |
| SHRIMP        | -----SSYMCCPQMLRTVHLMI---NN-----DVRTN---PESLTAC                     | 2852        |
| SCORPION      | -----KSVHYHPQLVAFCYECLN---CDV--K-----EMDID---YEQICTAS               | 2869        |
| SPONGE        | -----CSTQYYPPIGSLQDICY---YEN-----SLKIK---PPSITTSS                   | 2901        |
| <b>HUMAN</b>  | <b>-----TTF SFFPPFVSCIQDISC---QHA--A-----LLSLD---PAAVSAGC</b>       | <b>2880</b> |
| ESHARK        | -----ATTLNFPFVACIQDMSC---QHK--D-----LLGLD---STSVRSTS                | 2896        |
| LIMPET        | -----TTSQYYPPI LSCIMDIV---VLR--S-----RLKIS---PSNLSTCA               | 2846        |
| LINGULA       | -----SSTQYFSPPIGCVENIVY---NNS--G-----RLKLE---PSAVDTAS               | 2873        |
| TRICHOPLAX    | -----KSKHYFPPIIACVQDICY---QQK-----ELSIQ---SSFASVAS                  | 2873        |
| STONYCORAL    | -----SSTQFFPPFISSIQDICY---HEC--K-----LRSVD---SASVSTAC               | 2922        |
| STARFISH      | -----TSTQYFPPIISCVQEISY---YHS--E-----QLTLV---PSTISTAS               | 2938        |
| LANCELET      | -----NSEKYFPPIISSLQEICY---REP--R-----KLSPD---ASVIQQTG               | 2923        |
|               | : :                                                                 |             |

Supplementary Figure 4: CLUSTAL All phyla small

|               |                                                            |             |
|---------------|------------------------------------------------------------|-------------|
| APHANOMYCESE  | IASRNFTTQQRILEEIIIRAAD--S--R-----I---                      | 2567        |
| FLATWORM      | SAAHLPTLALALELLYAWQGRPGVQQSRDEPGRHRGRAAKATTEQLPTAAKRRRMEAG | 3165        |
| STYLONCHIA    | QHSMFQTALALLEESIIHGKQ-IQDEQ---FQQAMGK-----QGNKKRRIQDN      | 2987        |
| TRICHINELLA   | IGSGQPDCGIVLLEERRIEVGFV-DISAV---TCQ-----EKRL---            | 2811        |
| HETEROSTELIUM | NASGNHPMGIIVLESIIIESLLP--T-KP---SSK-----QYA---             | 2977        |
| GLOMUS        | SLSTESLGIILIERQLLRTSV-E--R---ESK-----RLRT---               | 2920        |
| MOSS          | RKSTNYHSGIMLLEKQIMNETF--PEPE---PNVS-----SKRQKG---          | 2866        |
| TERMITE       | RFSGLLALGCLSLLEEILIQKDT-VSEAG---SSK-----RSKT---            | 2845        |
| SALPINGOECA   | AAGRSFHTGALLLESTLAAAE-EAAMQ---PSK-----RSKM---              | 2919        |
| ROTIFER       | LNSFRQSLGIILLEEYIIFEE-DSDAP---LEK-----KVRL---              | 2840        |
| SHRIMP        | LGSRLAALGILVLERQALLSKR-GEEPH---PAR-----KMR---              | 2886        |
| SCORPION      | QASHKQSLGILLLEDHLICYNN-FKSSN---PAK-----RIKL---             | 2903        |
| SPONGE        | LASKQEFTGIMLLEKQLLNVD--S-SK---SAK-----RSRT---              | 2933        |
| <b>HUMAN</b>  | <b>LASLQQPVGIRLLEEALLRLP--A-EL---PAK-----RVRG---</b>       | <b>2912</b> |
| ESHARK        | LASLQQPMGILLLEKSLIHSTT--NEEP---PTK-----KARG---             | 2929        |
| LIMPET        | IVSSLQPLGIVVLEEQLIQDTS--TEQR---GNK-----RRKT---             | 2879        |
| LINGULA       | LISMQQPLGIVLLEEQLIQDGS--IERR---PAK-----RART---             | 2906        |
| TRICHOPLAX    | LASSQQPIGILLLEKQIMHLDT--EEP---PSK-----RIKT---              | 2905        |
| STONYCORAL    | LTSLQQPIGIMLLEKQLLEIEG--KSN---SRK-----RAKT---              | 2955        |
| STARFISH      | LTSQQMHGIRLLEENLIQKPW--QEEK---SAK-----RARF---              | 2971        |
| LANCELET      | VISLQQPIGIVLLEEQLVQKAG--VEEP---RSK-----RART---             | 2956        |

. . . : \*

|               |                                                               |             |
|---------------|---------------------------------------------------------------|-------------|
| APHANOMYCESE  | -----VSMAWNQLHHILQMVQNESYMMALSA-ETCV-LSE----                  | 2600        |
| FLATWORM      | SQESNDDNSADVGTGHADRHEEAYWLALARLYRDMGEPDQQLGALRRCSR-HNG----    | 3219        |
| STYLONCHIA    | SGQN-QKNGTGFMFNKVLGDNRKYWFNLIDLYDQIGNDALQGIWTFLADE-EGIFKVK    | 3045        |
| TRICHINELLA   | -----KQVNETDRLWVELARLYKQCGELENLKAFTKHLT-TEK----               | 2850        |
| HETEROSTELIUM | -----QNQATISESWDHLRELYHALKEEDIVLGLLERQMG-LPY----              | 3016        |
| GLOMUS        | -----T---SSSLVASSKRPWIELSHLYKSIDGHDVYNSIYESKIVV-SEL----       | 2962        |
| MOSS          | -----KGGQANRLLRPLEDAWLELAELYKALGENDIVLGLFGTHVAK-HEK----       | 2911        |
| TERMITE       | -----FEPSTEEILWLSLADLYKHMDWDVVRGIFHKYLNC-GEN----              | 2884        |
| SALPINGOECA   | -----RR-ARNGLTDEIERWIYLRFLKELGDYDTLHGIFSNQVLS-FEA----         | 2963        |
| ROTIFER       | -----N---PKDSSSEASILWIELAKLYRSMNDYDSIKGIFLVKSDLVCEH----       | 2883        |
| SHRIMP        | -----K---DAEALSQDDSLWLSIAEMYKNLNMWDVVRGVVQKGLGAIKEE----       | 2929        |
| SCORPION      | -----N---K-PLISDELSIWLKMAEIKYKSLSDYDSVHGIFSNLSNI-QEE----      | 2944        |
| SPONGE        | -----NKSNEVTETWIELARLYKSLEDYDVLHGIFTNLDDT-KDV----             | 2972        |
| <b>HUMAN</b>  | <b>-----K---ARLPPD--VLRWVELAKLYRSIGEDVLRGIFTSEIGT-KQI----</b> | <b>2952</b> |
| ESHARK        | -----R---QELPPDTPDVARWIELATLYRSLGDYDVLRGIFSEKIGT-KPL----      | 2971        |
| LIMPET        | -----E---G-TTVSTDVNLWIEARLYKSVENYDVLHGIFSGKIDT-KPI----        | 2920        |
| LINGULA       | -----S---A-TVPSQETSWLELARLYKSLGDFDVRGIFSSKIGT-KKI----         | 2947        |
| TRICHOPLAX    | -----SSASEATSNIWIELSKLYKSIGYDVLRGIFSGHLGT-KDI----             | 2944        |
| STONYCORAL    | -----S---T-VPPSEVTTWIELSKLYRSGDYDVLRGIFTGHIGT-KDI----         | 2996        |
| STARFISH      | -----V---S-REPSPEISTWIELARLYKALGDFDAVQGVFSACIGT-HEI----       | 3012        |
| LANCELET      | -----S---S-SPVSAETAWIELARLYKSLGDFDVLQGFIFSRKVG-TQTV----       | 2997        |

\* : : . . .

|               |                                                            |             |
|---------------|------------------------------------------------------------|-------------|
| APHANOMYCESE  | -----TNLALHAQLSGDLVAATIQHYKDAEGKFKLLDKSQ-----DVSL          | 2638        |
| FLATWORM      | --QEGVDN---NDDEERFNALDWCLSGDVLALATFDRLFRQ-ADESGTESASAADSAT | 3273        |
| STYLONCHIA    | DDQEKLSQDQERTVNLIKEAHCLRTKGSIDKGLKVLEQALND-KSLTDC-----LED  | 3096        |
| TRICHINELLA   | -----TKLALMEAAAGDFEGAATYGETFSNKQS-KSGD-----IVEK            | 2887        |
| HETEROSTELIUM | -----TKRALEAELSNDVAVLKAYDDGMAALESGQLAI-----TPSA            | 3054        |
| GLOMUS        | -----TKDALNAELLGDYALACKHYLEALKSEAD-----VDD                 | 2994        |
| MOSS          | -----TRALEIQLGGDLRQALDLYDQVIAIYEDGSLSG-----DITK            | 2949        |
| TERMITE       | -----VHKALKWETSGHWDKARMEYEALSS-MDDQDG-----                 | 2916        |
| SALPINGOECA   | -----TQRAARLEAAGRFDAAEVYKECMFKEEDEEDDD-----VPA             | 3000        |
| ROTIFER       | -----TERGIDFEAVNDYYSARNEYGAALDS--ELLEN-----VSQ             | 2917        |
| SHRIMP        | -----TQKALEAEATNNHVKAFLLYRQSLDT-TDWEE-----PLA              | 2964        |
| SCORPION      | -----TKQALEFESRGEYLLAVKIYSKLYDQ-TEWSAEE-----PNQ            | 2980        |
| SPONGE        | -----TRKALEAEERGDYLTALNLYKKAIDF--DWPQGE-----SPPQ           | 3008        |
| <b>HUMAN</b>  | <b>-----TQSALLAEARSDYSEAAKQYDEALNK-QDWVDGE-----PTE</b>     | <b>2988</b> |
| ESHARK        | -----THTALLAEAKSDYAEAVRLYDQALNT--EEMDGN-----PME            | 3007        |
| LIMPET        | -----TQEAAMAESKGDYQNTANKLYDEALS-I-QDWAGED-----PLE          | 2956        |
| LINGULA       | -----TQDALEAESRRDYKTASHLYREARQC-DSWTGDE-----PDG            | 2983        |
| TRICHOPLAX    | -----TQRALEAESRHDYAAAVKYNNQAMDC-SSWPDGE-----PQA            | 2980        |
| STONYCORAL    | -----TREAMEAEARGDYSQALKLYNEAIGTDDVWIKEE-----LRQ            | 3033        |
| STARFISH      | -----TKTALAEARGDYSTALKLYNQAF-E-MDWDEGA-----VSQ             | 3047        |
| LANCELET      | -----TYEALAEARGDFKKAVELYNQAMQE-TEWDPDQ-----PLA             | 3033        |

.

Supplementary Figure 4: CLUSTAL All phyla small

|               |                                                                         |             |
|---------------|-------------------------------------------------------------------------|-------------|
| APHANOMYCESE  | LEQQRWKSEQYNCLATLNRWDKVL EEVES-----LDLWQQNEPFL                          | 2678        |
| FLATWORM      | AVNNACQLARLDC LTR LADWSRLSGVSKLLLP-----ADGEEGSGLADR LWSRV--GV           | 3326        |
| STYLONCHIA    | HILCELENKQLDSKAE L LKWLWDELAKDMSEKY-HS-----KQLSEI----                   | 3135        |
| TRICHINELLA   | AESNLLEYEARIRC LEM LNDWKGLETWSTTF S-AS-----GKTAKLNQIWETD--YL            | 2935        |
| HETEROSTELIUM | RETS LWENGR LQCYESLREWSNLKANFIAYY-PG-----GPQSVFEEQDEAT                  | 3100        |
| GLOMUS        | IEVALWEERRFDCFEKLCQWDDL AETVLVDI-----EDNLSNLWED---EL                    | 3037        |
| MOSS          | SEIDIWYNQRLACLADLNEWEVLMEIEYES-----MEGDNSEPDFKRLWEP---TK                | 2998        |
| TERMITE       | -LSDYYEALYKCLAHLS DWKGLNNQVRRQV-----ENNL DQLWTD E--WL                   | 2959        |
| SALPINGOECA   | CEVDLWEETLAECSLR LDCWGELENNTLTCINPDVEYEGEGTDLAEVIDANN I WVQP--RL        | 3058        |
| ROTIFER       | SEQDLWLESLLKCCNELTDWKAMCEWSMNG-----NTLDQLFEDA--YS                       | 2959        |
| SHRIMP        | AENRLWEEWYSNCAAILGQWSELNFVEKRF LQDD-----DGEVDLNRVWLLP--KP               | 3014        |
| SCORPION      | AEIDLWDNAILQC YDYLTQWDLQLSIIINRL-DEN-----QKQPNLNKI WEEP--YY             | 3029        |
| SPONGE        | VEEDLWEDSLLNAYSHLTKWDL EKASTCNI-GE-----ETNSKLEQLWKDS--YC                | 3056        |
| <b>HUMAN</b>  | <b>AEKDFWELASLDCYNHLAEWKSLEYCSTASI-DS-----ENPPDLNKI WSEP--FY</b>        | <b>3036</b> |
| ESHARK        | TEKDFWEIAALECYNHLETKAL EYCS TVNI-DD-----KTPAD IENI WSDT--FY             | 3055        |
| LIMPET        | AEIDFWDDSRMQCDH L TQWKDL ETVCLTAI-DN-----TELPNLDK V WEDT--LY            | 3004        |
| LINGULA       | LEQELWVDAYLLCVDQLMSWEELGTEAMDCI-EG-----LEETGLNKI WEDA--YY               | 3031        |
| TRICHOPLAX    | EEEDLWEISRLECLYNLTQWKLE YLSLVNVI-DN-----NDPPSPDKI WEDN--YY              | 3028        |
| STONYCORAL    | EEEDLWDVSR LQC LADLTKWKELEKCSVESI-DD-----KNPPDLDK V WSDT--FY            | 3081        |
| STARFISH      | VEEDLWDESRLNCCNQ L TQWKELQNYSTVNI-DD-----NSPHDLGKI WSDT--FY             | 3095        |
| LANCELET      | VEEDLWDDSR LQC YDHL TQWKNLYEVSTVNI-DE-----DSPPNLDKM WDDT--YF            | 3081        |
|               | . * * :                                                                 | :           |
| APHANOMYCESE  | A---NHMGYFLEASMALN-----D---NDR LKSF FGSINNOQSDKQRYLNSRFPDI              | 2722        |
| FLATWORM      | QNVCKNALSSYML SSTR LVC DKPESAIGSDSES AEFMDFLRCTTDND SVRTQFESEHAEL       | 3386        |
| STYLONCHIA    | -----PFKH---AEKMIRAQIR---TDEYWNNTKQIAFWQKDQVSKAYLDKNFNVE                | 3181        |
| TRICHINELLA   | IN---MHLPVFLRSK LKIALTSDSA---A---LEELSAFVEQNTVPKNREIL ENRHSGL           | 2986        |
| HETEROSTELIUM | RH---EMMSHF LQYSLKVK-----ENWPDLYQFMGSL--TPSQHYM ESSFPGE                 | 3144        |
| GLOMUS        | QD---IYLQHFVHSFFKLSLSDDD-----NSEYRQRFDFIDGAMNNQYQKSLLTQYPIE             | 3089        |
| MOSS          | QE---IYLG YFIRGAVKEAKY-----HGLLTEFVQSSSEILPKRQFL LNEFSTQ                | 3044        |
| TERMITE       | QE---KLLPQILLSEIQMMLDKG-----VDSKREQFLQQVDRWLRDRDKSDYLS SHYCEE           | 3011        |
| SALPINGOECA   | LQ---RHLPHLITVRLELGISAV-----V---CACLQAFVEAARPHDRWAHLQYHFAME             | 3107        |
| ROTIFER       | IE---NVFPYAFRSK LKLLIQEDEN---EQKHKDLIRFINGL---EVEKKKYLEQSFQCE           | 3011        |
| SHRIMP        | TA---TALPALVHSK LLMNILDGSE---T---DGNLIAFIDQSGMDHRHRSML EGDLP LQ         | 3064        |
| SCORPION      | QE---NYLPFLIKSK LKLLIENR-----N---DQSL LCFIDSALKEENKKKYLEENFSEE          | 3078        |
| SPONGE        | QE---HYLPFVLSK LKLLWCTDD-----S---DHGLASF LDKSLSEANRSVLESHYPQE           | 3105        |
| <b>HUMAN</b>  | <b>QE---TYLPYMI RSK LKLLLQGE-----A---DQSL LTFIDKAMHGELQKAIL ELHYSQE</b> | <b>3085</b> |
| ESHARK        | QE---TYLSYMI RSK V KLLQSGE-----V---DQSL LTFVDRAMKVEQRKAVI ETYYSQE       | 3104        |
| LIMPET        | QE---HYLPYIIRSK LKLLLLGG-----D---QQSL LTFVDTSMKTTEYRAVLESRYSE           | 3053        |
| LINGULA       | QE---HYLPYILRSK V KLLLQGNE---D---QQDMLDFVDNSMNV EEQKIFLEARYSEE          | 3081        |
| TRICHOPLAX    | QE---NYLPPLFLSKAKVMCENDLA---G---SDDFIQYLNKSLANDEHLSVLENRHDCD            | 3079        |
| STONYCORAL    | QE---HYLPHLITSK LKLLCQGS-----G---DMTLNEFVAKAMKTSERAALRSRYSDS            | 3130        |
| STARFISH      | QE---LYLPHMMRSM LKQLMEGG-----E---DETLLQFIDASMSDADKRAFLEARYSEE           | 3144        |
| LANCELET      | QE---HYLPFTIRSK LKLLLEGE-----M---DQSL LNFVDSAMQKPRKALLESRYCEE           | 3130        |
|               | : . :                                                                   | :           |
| APHANOMYCESE  | LAAIYLQCQQTSDAQAAVEDFYQTC L NQWSSMPTAHQKR----QLERLPNAVFLDEVLN           | 2777        |
| FLATWORM      | LASVLIKTGKYHNAMAYVDSALDRVLNNVSSVPALQRQF--HLSNMA SVHRLTELRESLT           | 3444        |
| STYLONCHIA    | LAINSLTCKDYDRARFYLDKETNELLSQWKNLTKLSQVA--QHFLVQRIQKIYEMREFLQ            | 3239        |
| TRICHINELLA   | LVLNLILREDFTKSQYFLNVAIDSF LKCYPTLRVCDVTA--RLKL VQDLLPVSETAKFLH          | 3044        |
| HETEROSTELIUM | LAFLEITRSDFNRSQYIYIQFYRLFRDQWASTHPLALAS--RHRILQPIQKVVEVEEFLG            | 3202        |
| GLOMUS        | LALSSVTKDL EQGRFYVRKAFDNFLFAWSTLHPLAIGT--RLGKLSLQQIIVEIEEFLN            | 3147        |
| MOSS          | LATLAAINK EWDRA RFYLGC HLI FRRQWSALHPFALGS--RHQRVRLQKIVELEEFIT          | 3102        |
| TERMITE       | LAAIFLIQDKLDQAQHQVEHSLTMFLDSWAALNPSSHNL--RTKQLLDLQKTAE LKACLA           | 3069        |
| SALPINGOECA   | LAMLSVLR EDDFLARYHLSQALQRFLDDVNTLSPLMTET--RRASLQR LQCMVELQEFLD          | 3165        |
| ROTIFER       | MALISLHQNDLSAANYAH LAIQKYLTEWSS TNKTIKQN--QINKLQSLQ SIVELNEFLK          | 3069        |
| SHRIMP        | LGVLA AHQEKFEQANVYANTATSM TLLT LLSQYSVLT PNP--LLDTLQNVQLLTELSDCLN       | 3122        |
| SCORPION      | LALLYIIQENYDRAQYYSQ LCLQDFLKEWSSLNVLMP I I--RKT LQSLQKHIELOQFLH         | 3136        |
| SPONGE        | LTL SYVLRDDYDRAYYLSLSLKAQQIWSVQDGISSSTGAVSSTVQSLQR LRTMNEFIT            | 3165        |
| <b>HUMAN</b>  | <b>LSLLYLLQDDVDR AKYIYIQNGIQSFMQNYSSIDVLLHQ S--RLTKLQSVQALTEIQEFIS</b>  | <b>3143</b> |
| ESHARK        | LSLLYILQDDVDR AKYIYINNCMEVFMQNYSSIDTLLHQ S--RLTKLQSLQAVTEMQDFLH         | 3162        |
| LIMPET        | LSL MYLWQDN YDRARHYANLAKQFLQDWSSTDTLIVAS--RTSQ LQTLQPLVELHEFLH          | 3111        |
| LINGULA       | LALLYLFQEDYARARHYTSIVFKTFLQDWSIDTLM TTT--RIGKQLQLK LKTEMQEFLD           | 3139        |
| TRICHOPLAX    | LALIHV LLEKYDRARYYLD FSIQKFLQDWSALDSTLLYS--RASKLQSLQTLTEMQEF LQ         | 3137        |
| STONYCORAL    | LALMYVLQDN CDSASYAALSEQSFLSDWAGLDSNLRSS--RSIKLQSLQKITEMQEF LK           | 3188        |
| STARFISH      | LSTLYTIQEDYDRAMFYLANCRQSF LHDWSGLGPLMISS--RRAKLQCIQR LTEKQNF LK         | 3202        |
| LANCELET      | LAML YLQDDYGR AKYIYVGNCTDAFLQEWSGMDRLMTSS--RAAKLQSLQK LTEMQEF LK        | 3188        |
|               | : . :                                                                   | :           |



Supplementary Figure 4: CLUSTAL All phyla small

|               |                                                                    |             |
|---------------|--------------------------------------------------------------------|-------------|
| APHANOMYCESe  | -KLQAAS-----GLHGNDRARVISQ---VTNYAALTRLFE-----                      | 2932        |
| FLATWORM      | DRNFDAM-----SVA-----EKVAKVRRQLISPSPTWE-----                        | 3612        |
| STYLONCHIA    | DKLQKIVKVFDSKMQESFGED-----QQFQEDLRTEIKCILLK-----                   | 3424        |
| TRICHINELLA   | AYLMQALNLFDL---KRISDP-----EV-NVTEGSSADQFALIGMLFD---NVAETVV         | 3216        |
| HETEROSTELIUM | DRFIKAL-----KFVESKSDE-----DSIKNPNLQRYKRLHGNIQW---EIQYLDQ           | 3387        |
| GLOMUS        | EILLALS-----EEFKVKVSS-----DSRDDIKMRIIESEYTG---LLVSELD              | 3311        |
| MOSS          | KKLQQLL-----VYIETERRKLSKHPEFLPEFQM-----EQADV                       | 3277        |
| TERMITE       | KLGLDSWSVIEDQ-----RFEQYPMLHAETLQHVSVMAAGILQ                        | 3233        |
| SALPINGOECA   | H-YFRAF-ARDLDRLNKCSADLPPSKSG---AHSLYKAEVLLSLGKIV---PLCPATD         | 3374        |
| ROTIFER       | ESFFESMVLREILKYDISDFTFKNNQKNY-----LYQEQRVLSKFSK---FLIESLM          | 3284        |
| SHRIMP        | KYLVEAWA---KYLGRVSSM-----SILDQNPVREIQYLKLESHLCL---EICRAIQ          | 3296        |
| SCORPION      | DTLLCAH---KQLAKLDLHFP-----KKLDVSTMNHYLLQSEIIE---MAADIVK            | 3335        |
| SPONGE        | EAVISLT-----CQMDNFKRGLGGSGKGAIS-SKPFISQHVLLGKLLN---KMAEIFA         | 3365        |
| <b>HUMAN</b>  | <b>LTVLKTV---SLLDENNVS-----SYLSKNILAFRDQNILGTTYR---IIANALS</b>     | <b>3342</b> |
| ESHARK        | VTVLKSI---PLLVEINV-----DYLNTHTRILRDQNTLLGSSYC---ILADALN            | 3360        |
| LIMPET        | NGLLTTI-----GKFNDS-----DVLKSKPDLYRRHHVLTATSYE---LAECSL             | 3291        |
| LINGULA       | SPLV GAL---GLLERKRDH---KLVKSNVLTTRRHVLVQGNIFD---SVTSSLL            | 3320        |
| TRICHOPLAX    | KTLLTAN---SQFEKVKDL---SVILENTLMREHLLRSRLLD---MTSKILA               | 3339        |
| STONYCORAL    | ETALLVA---GQLDKFSAS---KILEIEPLRGIQHILRSKTFD---ILCKAML              | 3374        |
| STARFISH      | MTLLTTF---DPLAKLSNT---PALTG DYCLTRHHHTLTSKSYD---LVAIAIQ            | 3388        |
| LANCELET      | NNVLTTF---EQLDKFSSC---RVFEEDLAVAKQHHTLTSLSYE---IVAHALI             | 3375        |
|               |                                                                    |             |
| APHANOMYCESe  | N-D-----EVLELISTMPPDAQAE--ICGWQARGLMES                             | 2962        |
| FLATWORM      | AAGLCDRASAA-----LLRIQLASSPPSTGQANM---RAEAEA--                      | 3647        |
| STYLONCHIA    | KKMLNI-----IFQVSAEKEIKH--LQRYQKDC TT--                             | 3453        |
| TRICHINELLA   | ASSENT---L-----AEFCL---SR--WISKTDADISEL-----VTM--                  | 3246        |
| HETEROSTELIUM | KLGSNL-----VMENLKK-----NGLTSLSSLP TT--                             | 3417        |
| GLOMUS        | K-RVFN-----RNLKIKHKKNY-----                                        | 3328        |
| MOSS          | NARVAWAT-----LSSQSGEGATSQDITACFA-----                              | 3304        |
| TERMITE       | QLEQQPGVLT---K---LPAAE-----VKKLADRIGAPDCSQDTL-MQN-----             | 3270        |
| SALPINGOECA   | ENKVLWDHI IAEVDAPDATRAGEKCI VRAFDV LLETAQRAP TDPKAL-PVGWRKVPSK--   | 3431        |
| ROTIFER       | DHMNQTFDFD SGL-Q---GIITEKKHV---LQLSDYVKNDINDFEKT-ISS-----          | 3327        |
| SHRIMP        | DMGGDW---T-----EDNQY-----MQVLSKKFENANGKESW-QRE-----                | 3328        |
| SCORPION      | YNDVHA---E-----KIQELTDFPSIQSKSL-EID-----                           | 3362        |
| SPONGE        | TPEDGM---LAL-S---ALSNDGN---TKLNSLIGGTPSTSTKAI-SEG-----             | 3403        |
| <b>HUMAN</b>  | <b>SEPA CL---A---E---IEEDK-----ARRILELSGSSSEDSEKV-TAG-----</b>     | <b>3376</b> |
| ESHARK        | KEPTCL---Q---R---IKEDQ-----AERVIEHSGSSSEEQEV-VIG-----              | 3394        |
| LIMPET        | AAELPQ---S---L---SSKTC DK---LKNL-LKTDNLDKTQVNI-VSD-----            | 3326        |
| LINGULA       | SLPDFS---S---V---SPRDIQK---LVEAASC SQNA-DMQEI-ING-----             | 3355        |
| TRICHOPLAX    | ESDASI---L---D---LLN-EKK---ESLYQLANVNQHDSKEKI-AAK-----             | 3374        |
| STONYCORAL    | DGGVVI---A---T---L-ESQAK---NALVKLCRIDETESQKVV-VSD-----             | 3409        |
| STARFISH      | KGGADI---L---T---GLRNVGK---LDKLLGLVGONATRPEQI-CST-----             | 3424        |
| LANCELET      | QEGGAI---L---T---GLKDTRH---AQLLTAAGVSPDTSVDQT-ISS-----             | 3411        |
|               |                                                                    |             |
| APHANOMYCESe  | SDFQREYGPST---SVK-----LS---SAAL-EIFQYQTSKATNVTTMHLTYIEYLDKI        | 3010        |
| FLATWORM      | -FDKSALS NLQS---A-----ASKADGV-----GFADVGSSSLQCHLELIRFC DSC         | 3689        |
| STYLONCHIA    | -YLDRSFKTL DQ---VIKKVQT-AAQ-----FDDQMKTMAKTYFKFAQFSDKI             | 3497        |
| TRICHINELLA   | -CYGQAFRYLKL---SCQ-----YSS-----QLNIESPKLTEPLMELSSFC DRI            | 3286        |
| HETEROSTELIUM | -LFSLAYQSYSQ---SIQ-----LYDSNS-----NNNNDTHKS KSAYLQFGNFC DTE        | 3460        |
| GLOMUS        | -FIERGYNLFNN---ATK-----EI-----SLQLKPSMHAKILVKFAKFC D YF            | 3367        |
| MOSS          | -LLGSAFKTYST---ALD-----NDDPLS-EIT TGSLSPHDTAKALLKFGLC D EL         | 3350        |
| TERMITE       | -LKKYGLSSLKTA AEVVT-----PRGNSEQAVAKAYLQVAKYCR AH                   | 3310        |
| SALPINGOECA   | -RRAGQFAYVSPFGDRVGNVPSHAPKFNKNPLDVLFP SATAYGSETLNAFVRLAEFC ADV     | 3490        |
| ROTIFER       | -LMKHGVDNL-----LKIKDSLKGSLELATYCD FY                               | 3356        |
| SHRIMP        | -LLSCSYKSLQL---AVN-----CAEGKLVKSDAL-NQDSSKKS DSDAHLALVKYCEEC       | 3377        |
| SCORPION      | -LFCKNY EYKCR---AID-----IIQEVEQ--K---MIEFDQATIGET YFKFAN YCNKI     | 3407        |
| SPONGE        | -LWIQALSSFNA---GVR-----SGTTLN-----PLTKDPVPTVQSLEELFGCDNA           | 3446        |
| <b>HUMAN</b>  | <b>-LYQRAFQHLSE---AVQ-----AAEEEAQPPS---WSCGPAAGVIDAYMTLADFC DQ</b> | <b>3423</b> |
| ESHARK        | -LHRKTLHYLER---AVR-----KAEEEVQSLA---GEHVDIAGVIEAYVNLANFC DRC       | 3441        |
| LIMPET        | -LLQKSHQELKS---AIS-----DSVVT RS-----RSEST EADAQIALSKFC D KF        | 3368        |
| LINGULA       | -LVDRGYQYIKE---AVD-----IYEEDS-----SNDKSTVETHMALAKYCDKY             | 3395        |
| TRICHOPLAX    | -LTSHACQALHQ---AVK-----ASKEERG---GSSYIEAMMMVNFCD DI                | 3413        |
| STONYCORAL    | -LMTRS FVSLQS---AIK-----AAKNAEG--K---CNTTQTS GTV DAMIAMVNFCD NC    | 3454        |
| STARFISH      | -LYSKAYS ELKQ---AVS-----LADKDD--A---VTSQSERSMTEAYMALVSFC D RM      | 3468        |
| LANCELET      | -LLQKGHACLQK---AVK-----LASDEEKARQ---D TSLDKSGIVDAFAMMVGFC D KI     | 3458        |

Supplementary Figure 4: CLUSTAL All phyla small

|               |                                          |                                         |             |             |
|---------------|------------------------------------------|-----------------------------------------|-------------|-------------|
| APHANOMYCESE  | IERTP-----SSTDLVNQFVTNVLWGM              | SMDAK-GCSAYFPRVLGLLRE                   | 3052        |             |
| FLATWORM      | LLEAAPNQPPQ-----FRAALRAQAVDSVTS          | AMRCGSQ-EASIRFPRLLCLLGE                 | 3738        |             |
| STYLONCHIA    | LRKMENDQCRYVITNSLKLQNLKSEEQVARD          | SIKYGLLSLNHEYQ-NASDIIPRLLDITSK          | 3556        |             |
| TRICHINELLA   | LRKNGHTS-----LVNSECACVMVRSILKS           | MKNESH-LARQLFPRLLSVMMEK                 | 3332        |             |
| HETEROSTELIUM | LQRRGDQS-----E-----DSNRLAVSVVNS          | SIMNAIKQEIP-GAIEKFPRLLLEIIEQ            | 3506        |             |
| GLOMUS        | LRKLDFTTEQTQTI-----FDPAQYASNVVES         | ILQAMENGSK-EATELFPRLLQIIEK              | 3419        |             |
| MOSS          | LKLSQQPEERSQMTQHHLFGLPQASDLSLLV          | RHMLKALALDSTLQAQHAVARLLSLVGF            | 3410        |             |
| TERMITE       | SNTS-----REDNFGTDIVTSILRAMRYGSK          | -DARQLFPCLLQLPGL                        | 3351        |             |
| SALPINGOECA   | LQDRAMP--KD-----SMGRVKQVFVETALA          | AMRSGNV-LMRQYFPQLNLNGER                 | 3537        |             |
| ROTIFER       | LRIAENDN--NDFEKLTLIGQMIRSQFPFIVTE        | QLFYSIRSGSL-EARTRFPRLLQIIEI             | 3413        |             |
| SHRIMP        | VIKWKDHV-----DVSQYSKSLMVSVLRAM           | ANGSR-DAHFFPRLINLMNE                    | 3422        |             |
| SCORPION      | LRMQEEEE--KTLSL-----SFETYPSVLTN          | SLLNALKNGNL-NAIKLFPRLLQIIEV             | 3457        |             |
| SPONGE        | LRQEDHDD--EQSTG-----LDTKSFPSII           | INHTLTAMSLGSS-KARELFPRLLQLVEA           | 3497        |             |
| <b>HUMAN</b>  | <b>LRKEEENA--SVIDS-----AELQAYPALVVEK</b> | <b>MKLKALKLSN-EARLKFPRLLQIIEI</b>       | <b>3474</b> |             |
| ESHARK        | LREKEESA--TAINF-----SEQTFPACVVEK         | ILKAMKYNSK-EARLKFPRLLQIVKL              | 3492        |             |
| LIMPET        | LRMKENEE--EHIKE---K--VIENYGETII          | ICLLKAMKLGSM-EAIERFPRLLQFVEL            | 3419        |             |
| LINGULA       | LKLREEDD--SLTGE-----SIDSYPEAVVT          | SLLRCELDDHM-DARQRFPRLLQLVEY             | 3445        |             |
| TRICHOPLAX    | LRHEEDGR--ANQPK---GLIDTKIFPEVIRY         | TLEAMAYNSM-DARQRFPRLLQIVER              | 3466        |             |
| STONYCORAL    | LRKKEVSV--APV-E---V--DTKLPFGIVVRY        | MKSMCYSSK-EARQKFPRLLQIVHK               | 3504        |             |
| STARFISH      | LRLKESDE--VPM-T---YLPQTDNFSQTVV          | HYTLKAMHYSSQ-EARQRFPRLLQLVEA            | 3520        |             |
| LANCELET      | LRHQEDDE--EGT-E---LSSIPGLAAAVVSN         | LQALRHDSPEARQRFPRLLQLVEI                | 3509        |             |
|               | :                                        | . : :                                   |             |             |
| APHANOMYCESE  | HPT-L-----INMAREKLK---QIPLWTC            | LHWSAQVMALMSEKPSPFNDFILTL               | 3098        |             |
| FLATWORM      | SADDEASQNPADESLSSRFSRQMA---SVPV          | WLSLPWLPQLVSLLDKPD-QGGS                 | AVLPL       | 3794        |
| STYLONCHIA    | YKDHV-----QGDFIAYSK---ETPTWY             | FLRWINQIVAVVNRPE---SSVIEEKV             | 3600        |             |
| TRICHINELLA   | YPE-S-----ELEFQAEID---SVPSW              | MFLSWMNQMSALKRNS----KFYSIL              | 3373        |             |
| HETEROSTELIUM | YEK-A-----AKEFVERTK---QIPCW              | MFIWQSQMFPYLDTPQ---GPYILPL              | 3549        |             |
| GLOMUS        | YHN-T-----QSIKFKVES---IESVW              | KFIRWIPQIVALLDQSI---AHCVP               | PI          | 3463        |
| MOSS          | SSA-T-----QNEFERFLD---NVSSW              | VFWVWIPQMLANIEEDS---GRVL                | LIKVL       | 3453        |
| TERMITE       | DTS-L-----SELPHKES---AVPVW               | MFLGWVQLLACLGTVP---GPVLHD               | II          | 3394        |
| SALPINGOECA   | PTD-S-----DHLQVRLASATTSVPCW              | MFLNWIPOMLAILDAPV---APV                 | VQ          | 3583        |
| ROTIFER       | YPDEC-----LEKFVSSSE---DIPSW              | MFLSWLSQMTALLDKPQ---AKAI                | IQ          | 3457        |
| SHRIMP        | DAS-L-----LSSFKEEYE---KVP                | IWMFLWLSHILIVYDKVP---G                  | PALQ        | 3465        |
| SCORPION      | YPD-T-----IPEFIAKSK---VVPCW              | MFLSWINQLLTLDDKPE---ATAV                | QY          | 3500        |
| SPONGE        | HPD-T-----MDLMINKSS---TIPCW              | MFIGWINQMIALLVDKPE---SRAV               | HD          | 3540        |
| <b>HUMAN</b>  | <b>YPEET-----LSLMTKEIS---SVPCW</b>       | <b>QFISWISHMVALLDKQ---AVAV</b>          | <b>QHSV</b> | <b>3518</b> |
| ESHARK        | YSAET-----LDLMKKEVS---SVPCW              | QFIGWINQMAELDKKE---AVV                  | VQH         | 3536        |
| LIMPET        | YPD-T-----MPTFIKMVSENRLFP                | LMFLWLNQMMALIDKTE---SPAV                | Q           | 3465        |
| LINGULA       | YPD-T-----MQGFINKVS---VIPCW              | MFTWIGQLVALLDKPE---APAV                 | VHN         | 3488        |
| TRICHOPLAX    | NPN-T-----IDGFMKSS---AIPSW               | MFIGWISQMMALIDKPE---ARAV                | Q           | 3509        |
| STONYCORAL    | YPD-T-----LEAFVKKAA---DVPCW              | MFIGWINQMMALIDKPE---GKAV                | HG          | 3547        |
| STARFISH      | CPD-T-----MQLMIKEVS---DVPCW              | MFIGWISQMMALIDKPE---GPAV                | HG          | 3563        |
| LANCELET      | YPD-T-----MDLFIEKVS---HVPSW              | LCSWLGQMMVALLDKPE---AVAV                | HG          | 3552        |
|               | *                                        | : * : :                                 | :           |             |
| APHANOMYCESE  | EMMAEYPRALYYDFRLSQESIIDIET-----          | NPRFHRLSAAALR---DVHLDQFVAAL             | 3148        |             |
| FLATWORM      | ESVCDIYPAALVYFRLARANYRFETGD---           | SGARQAAERLWQRLRR--LPLVEEFIAQ            | 3849        |             |
| STYLONCHIA    | IQIAKKYQALYYPFKVVENSVKNVVDL--            | SDVQRTQLFQKLSKYE-KTFRNLNAWAEAL          | 3658        |             |
| TRICHINELLA   | ERIADDYQALYPLLMLKSA-----TG               | DVGETDFYRLQLKLRK--TKIVKEFIDAL           | 3423        |             |
| HETEROSTELIUM | QEIASNYQAIYFPFKISSEQFGPTA-----           | KKLTAKLEQTLK---NPLIDTLISEF              | 3598        |             |
| GLOMUS        | FKLAEKFPGLYPLTISSEYKFDENNPLTREN          | KAKIQELKQMIK---CDVDTFVTLE               | 3520        |             |
| MOSS          | ESIAKSYQALYFPFRVSETDFGAIG-----           | RQRTQHLKILLR---NPLLEGLVRL               | 3502        |             |
| TERMITE       | LRLAETYPQSLIYAFQLSREKYNLES               | SGH-V--SLKALVDQLASLLFT--DPVID           | IFLRAF      | 3449        |
| SALPINGOECA   | KTIASSYPQALCFVPMLSSEKLFSGAA--            | SS-TQRTFFTNLVRMVT---TDHLRRFVTEL         | 3638        |             |
| ROTIFER       | ENISIEYPQALVYFRMSTENFKFSNEL---           | NEQSDVQKISRHLN-TQLPLVEQFITAL            | 3513        |             |
| SHRIMP        | ERLAAEYPQAVIYFPFGISKQYFNSS-H-            | EGKLAKAMCDKVEALLSS--HKLLHQFVSAM         | 3521        |             |
| SCORPION      | KEIGTNFPNALVYFKLSYEMYKFPDTL--            | QGENKEFVMKLSLSLQ--LKLVD                 | EFVNAL      | 3557        |
| SPONGE        | IRIADTYPQSLYAFRMSSSGYKFGHNN---           | SEGKELFEKLEKELQ---SQLMDEFIAAL           | 3594        |             |
| <b>HUMAN</b>  | <b>EEITDNYQAIYVYFIISSSESYSFKDTS--</b>    | <b>TGHKNKEFVARIKSKLDQ---GGVIQDFINAL</b> | <b>3575</b> |             |
| ESHARK        | EEIADSYQAIYVYPLMISSESYSYFQTA--           | RGNTNKEFVERLKNKLDK--GGMVEVFINSL         | 3593        |             |
| LIMPET        | LQIETYPQAIAYPFRISCEGFEDSA--              | QGKKNKEAVKKLASLITEDKVPVLNKFI            | 3524        |             |
| LINGULA       | IRIAREYPQALVYFPKVSKECYTFERS--            | EGKENQAVVERLDFSLK--K-IPLVETFINAL        | 3545        |             |
| TRICHOPLAX    | FRIADEYPQAIYAFKVSNEQYTFEETS--            | VGRQNKTAVSKLSSKLQ---LPLIESFVRAL         | 3565        |             |
| STONYCORAL    | SEIAKRYQALWYFPKISSEHFVFENSE--            | DGKANEEAVKRLRSLE---HPLDDFIAL            | 3603        |             |
| STARFISH      | TDIAYEYPQALCFPKISSESFTFDES--             | TGRKNASAARKIGALE-S-IPLDDFICAL           | 3620        |             |
| LANCELET      | TRIAQEYPQALVYPLKISSENFEDSV--             | TGRNQEAVTSLKKTLK--VIYSLVDK              | 3610        |             |
|               | :                                        | * : : : . :                             | :           |             |

Supplementary Figure 4: CLUSTAL All phyla small

|               |                                                                |             |
|---------------|----------------------------------------------------------------|-------------|
| APHANOMYCESE  | HGLHHPHPEIRLKEALRYLSDVVES-----KPAKEA-SKIIAATISHVLDDESSKILGN-   | 3198        |
| FLATWORM      | GEVCLPACTALDWLSSAKRSIG-----QTERLRELHAEAIDQLFFDPPG----          | 3893        |
| STYLONCHIA    | DCLVYPEHRFKYWLQIINDIVSDDNM----RGIQKAKLKDIIIMMAYDLTCTQKDLL---   | 3711        |
| TRICHINELLA   | NLLSHPDIHAIDELESIIILNISN-----NSNEARKEAIAKVVSFVTFADIR----       | 3469        |
| HETEROSTELIUM | ERLTHPEHRFKDYMETVKTMKK-----STPINTSEIQKLGVEIYNDCFNP-----        | 3643        |
| GLOMUS        | HRLTDSEIHFCNWINPVYNLVKRNYS---GVDKTAIEIKASFQKMSFLLK-----        | 3567        |
| MOSS          | EDLTFPQQRKLDGLLQILNFLF-----TNDSERAQLVFNEIYQDCLDTQSLKDPVR       | 3553        |
| TERMITE       | SCLGQPRKMLYHFVEKLEQLLN-----AKRPNCDLHMHMYDTMMKELFPSSYGKIHA      | 3502        |
| SALPINGOECA   | KCLTNPVMAYMDWLEEQDQAI-----KKRDQDALLTAFKHLKSELLVTSSTTASDR       | 3689        |
| ROTIFER       | EHLNTPKLFNFNDLIMDINNLLK-----KNDVIMKLFKDLNLLLIDLEGKIDF--        | 3560        |
| SHRIMP        | SLMVVPSIACKDAIQNVLQEK-----DKQKMEEGLSSEIVSEFLKQVNRSSKGN         | 3569        |
| SCORPION      | DSLVSPELLYKEYFKEILQMK-----KDKGDKNEIVKLYKKLCHLNFYNPRDKMK-       | 3608        |
| SPONGE        | EQLNSPELAWKDWYDNEKPLVGSVT---VPKRDKNAIKRVWEQMSQLLETRSGLDGKS     | 3651        |
| <b>HUMAN</b>  | <b>DQLSNPELLFKDWSNDVRAELA-----KTPVNKKKNIKEMYERMYAALGD-----</b> | <b>3619</b> |
| ESHARK        | EQLSNPDMFLKDWVDNFRSKLE-----KK-ENKTQLKNLYSEMYSNLAN-----         | 3636        |
| LIMPET        | DQFGQPEMLFKDWTDDIKKMLQ-----SKNRNKSIMKEYKEIYNMLIEYKETQDTSS      | 3577        |
| LINGULA       | EQFGQPNALFKDWIGEMAKLLH-----VKQRNTDAVQRQCYTQMYSSLMMTQRQAGGV-    | 3597        |
| TRICHOPLAX    | EQLSQPDLVFKDWDEVKGLK-----KKSGSIAESIRICYQKLRDGLLVDAASNESEA-     | 3617        |
| STONYCORAL    | EMLTNPMEVFRDWCCEGPMKQLLEDQ---IKRNDSSQAVKQCFGAMFQLMDCRKRKTSK-   | 3658        |
| STARFISH      | EQLNPNPEVFKDWADDVMK-PLLNVA----KRDKNKIRQACHEIYMNLINHRSTVTDTG    | 3674        |
| LANCELET      | EQLSHPDQLFKDWGDDADLKRLLKVDPPKRTKEDKVTIKRLYDEMYDSSLDFRSASQDSS   | 3670        |
|               |                                                                |             |
| APHANOMYCESE  | -----QIGVYNRQWITKNRKQIESMLGKHGELANKSTLQTAKGWLSQ                | 3240        |
| FLATWORM      | -----PQAGSHGRLRREFAARHREFLAALPTADRLVGI RSEAELQRAVGK            | 3939        |
| STYLONCHIA    | -----GD-QVGSYNRKFALWDKVFKEFGSNLNRVDKMSNSEI IKSQVN              | 3755        |
| TRICHINELLA   | -----RD-FLGSFWKCYFKYLPKMQEII FSVDLCAFDNKAENYLRLLCSS            | 3513        |
| HETEROSTELIUM | -----HTV-RGDYNLKFKEWDDHYSQHFSDGSKLAKMDVKKLVELVAD               | 3687        |
| GLOMUS        | -----PNPY-HGIFAKEFVNRHSEYLFDCGRDGSILARMSPNDFKSKIYD             | 3612        |
| MOSS          | -----QTGEYNLKFARDWASLIVKELGLNGSKLRSMDAKQFSSVISG                | 3595        |
| TERMITE       | L-----FKDIQEYRKRLEKAES----NI-KCGNKKV---LKDICFKEK               | 3538        |
| SALPINGOECA   | -----EVGSAWKAANKASRNFMDDQFGTDGSKLLRMDAKAYAKVKKV                | 3731        |
| ROTIFER       | -----CGRLWTFDFSNFIKPLFMKQFGEQFRLLPQLSELEIKNKLQN                | 3601        |
| SHRIMP        | A-----EEKGEAYTRQDRAKQMAEAFTKAFGENLKKAKSLSIRD IQRELGS           | 3616        |
| SCORPION      | -----ERKHLKVAKVCGSVVFSEFGKDNKLI SEMPLKEASVKYET                 | 3649        |
| SPONGE        | L-----YGGSPSLQ-KGARQKTFAQAYAKNIEDKFGKGGAKIISMSGTQLASAFNE       | 3701        |
| <b>HUMAN</b>  | <b>-----PKAPG-LGAFRRRFIQTTFGKEFDKHFPGKGGSKLLRMKLSDFNDITNM</b>  | <b>3665</b> |
| ESHARK        | -----AGAPG-IGAFRRRFVYGFKKKIDQHFPGKDGLLLLLNMNLKAFNVAVGQ         | 3682        |
| LIMPET        | -----TQLSYMTQTTVNG-MGEYRKKFADTFKKDFDIAFGKNGEKLASMSIK--         | 3623        |
| LINGULA       | -----SQDIFDTEPDSVE-IGQYRQKFAKAYCKDLDSAFGKDGKIMTMSEEAADGIFK     | 3651        |
| TRICHOPLAX    | -----ASSLTSGELIE-FGSHKRRFIQHFGKVEIQYFGKDGSKLQSMKASDFEKIASR     | 3669        |
| STONYCORAL    | -----SQRTRGTE-SGPFRTKFAQEFANEVQRI FPGKEGKLVGKMTDFSKWCRD        | 3706        |
| STARFISH      | A----GSSQDSQSSPSVG-FGNFRRRFAQEWQKKFEAAFPGKDGTKVIDMQLKTFSEHY--  | 3727        |
| LANCELET      | MSSLFSGSQSSDLESQSVG-FGPFRRRFAQQFAKECEKMFPGKDGSRILDMKEFEFMKLGK  | 3729        |
|               |                                                                |             |
| APHANOMYCESe  | SFQVMPGK-----YGIDRQWKAKLSDFS DWLMQLDPVKT-----RIELPG            | 3280        |
| FLATWORM      | LWKRVRD-----ERDSSVATARLADFS TWLAEFAATEH-----GDAYLEVPG          | 3982        |
| STYLONCHIA    | LNNKLNQS-----IGNLGQGYEKLSSTFSEWLDLDFNDF-----YNPSEYIELPG        | 3800        |
| TRICHINELLA   | FLSELRTFY-----IPECCPNLNEYSPWLAGYRPHM-----DVFLEIPG              | 3554        |
| HETEROSTELIUM | MSGMAKT-----MKPSSATMKLKDFSNWLVEFDRSNQ-----LTEIELPG             | 3729        |
| GLOMUS        | YYIKNIK-----RQDRKAQEGVNLKSYSAWLAEYSSNV-----EKEIEIPG            | 3655        |
| MOSS          | LFEKLSKN-----DISAEKISLGSLSKWLADFDQTKGIERSRDFDKNEMQIEIPG        | 3646        |
| TERMITE       | L-----KYIIQIDIKPPVQLKDYSPWLSEFQGGKH-----CFLELEIPG              | 3576        |
| SALPINGOECA   | LKAKLREY-----DTKKPPRTLKEYSPWLSKYRSPGA-----VFDIEIPG             | 3771        |
| ROTIFER       | ICSQVNEF-----CQRKPMGSLGDYSAWLKGFKR-NI-----TKDIEIPG             | 3641        |
| SHRIMP        | MGRVL-----QLSPEEMRKLPRQLKAYSPWLANFQASKY-----SEVLEIPG           | 3658        |
| SCORPION      | LLKKITT-----MSEMKEAKLRDFSDWLESEFHSIKY-----SEDIEIPG             | 3689        |
| SPONGE        | VYNKMRE-----SLNKFSSSALKDYSPWLDTFRQEDY-----LQVIEVPG             | 3742        |
| <b>HUMAN</b>  | <b>LLLKMN-----KDSKPPGNLKECSPWMSDFKVEFL-----RNELEIPG</b>        | <b>3703</b> |
| ESHARK        | IM--ET-----QKPEPPGNLKEYSPWMSNFKPQFL-----GNELEIPG               | 3718        |
| LIMPET        | -----KGRGKLVPPLSLHEYCQWLADFNPNRD-----SRELEIPG                  | 3658        |
| LINGULA       | MDLASK-----GTKGHPNLVPSEKLGDYSKWMSGLAAQDM-----DLSLEIPG          | 3694        |
| TRICHOPLAX    | LIQELISG-----KIKNRPENLKEYCPWLSNFOAANF-----TYSIEVPG             | 3708        |
| STONYCORAL    | IQQKMKF-----RNRTPPPGLKEYSPWLSRFQSNNF-----THTLEIPG              | 3747        |
| STARFISH      | -----GKLYKEMAA---KRRDPPGNLKEYSPWLSDFQQLSY-----DRELEIPG         | 3768        |
| LANCELET      | LQNMGMDFYRKAFPREKANCYAPGLLKDYCPWLSDFNPLDY-----DRELEIPG         | 3778        |

\* . \*\* :\*:\*\*

Supplementary Figure 4: CLUSTAL All phyla small

|               |                                                                  |             |
|---------------|------------------------------------------------------------------|-------------|
| APHANOMYCESE  | QYIKR-----WAKPDPSTHTYIILSCDPQLMVLPSKQLPKRLKLYASDEKTYLFLVKGGE     | 3334        |
| FLATWORM      | QYQCRDSLATSLAKPQPELHTRIAAGFGDTRVVRMSSLRRPHRLTIRGNDQRDRPYLVKAGE   | 4042        |
| STYLONCHIA    | QYEGE-----KSEPLIEKNVKIASVKKTLILLGSIIRPKRITVHGSNEKDYHLLIKGGE      | 3854        |
| TRICHINELLA   | QYSGD-----RRPFPERHVHIIGFASDIEIMRSLKKPKKICIQGDDGRDYKYLKAGE        | 3607        |
| HETEROSTELIUM | QYHGT-----SKPQPELHIKISSFDPNLLVMGSLRKPRIKIHGSDQDYPLIKGGE          | 3782        |
| GLOMUS        | QYDGL-----LSIPDPKSHIKIASFDPKLLVLRSLRKPKRITILGTDGNEYLFLVKGGE      | 3709        |
| MOSS          | QYNGS-----SIPNLSHTVQLLGFQVLIICLKSQRPKILTRGSDENDYKFLVKGGE         | 3699        |
| TERMITE       | QYTGE-----SKPLIQHHVKIAGFKQTVVPMKTLRLPLQVTFGSDAKEHQYLKAGE         | 3629        |
| SALPINGOECA   | QYGGT-----EMPIPEEHAKIEGFDEKLLIMASIRRMRLTFRGSDEREYRFLVKGGE        | 3824        |
| ROTIFER       | QYNGN-----EKPMPEYHVKIESFDERILEMSSLRRPKCITIRGDDQREYKFLVKGGE       | 3694        |
| SHRIMP        | QYTMG-----SKPLPEYHVKISSFDENVLLMSSMRVPMRIIRGDDEKEYKFLVKGGE        | 3711        |
| SCORPION      | QYTGK-----RKPIPEHHVKICNFQDQVDILSSLTKPRLTIRGNDQKDYKFLVKSAGE       | 3742        |
| SPONGE        | LYDGR-----SKPLPEYHAKITRFDAKVLILSSLRKPRLTIIGDDTREYMFVKGGE         | 3795        |
| <b>HUMAN</b>  | <b>QYDGR-----GKPLPEYHVRIAGFDERVTVMASLRRPKRIIRGHDEREHPFLVKGGE</b> | <b>3756</b> |
| ESHARK        | QYDGG-----CKPLPEYHAKITGFDERVKVMSSIRKPKRLIIRGNDEKEYPFLVKGGE       | 3771        |
| LIMPET        | QYDGL-----SKPLPEYHVKIVAGFDERVLMSSLRPKRITIRGNDEKDYHFLVKGGE        | 3711        |
| LINGULA       | QYTGK-----SKPMPEYHVKIVAGFDSRVLVLSMRPKRITIRGNDMDKHKFLVKGGE        | 3747        |
| TRICHOPLAX    | QYTRG-----SKPLPEYHLKIASFGERLLVLKSIKPKLRLTVQGDDEKEYLFLVKGGE       | 3761        |
| STONYCORAL    | QYKGG-----TKPLPEYHVKIVGFDEKQVQLPSIRKPKLIIRGDDEKDHMFLVKGGE        | 3800        |
| STARFISH      | QYGGK-----SKPLPEYHVKIVAGFDEKQVQLSSMRPKRIVIRGNDEHDYSFLVKGGE       | 3821        |
| LANCELET      | QYTGK-----VKPLMQYHAKIAGFDQVRVVMSSLRPKRVTIRGDDERDHPFLVKGGE        | 3831        |

\* \* . : : : : : : \* . . . . : : \* \*

ATP binding site

|               |                                                                      |             |
|---------------|----------------------------------------------------------------------|-------------|
| APHANOMYCESE  | DLRLDQRIEQFLFGAMNTILQSSNQCSRRH--LNTRTYNVIPMTTKIGLVEWLENTTTLKS        | 3392        |
| FLATWORM      | DLRQDQRIQALGLFNSSLQRDIQCRLRR--LSLVTYQVPLSPDLGILEWLERTQPYKD           | 4100        |
| STYLONCHIA    | DLRLDQRVQQLFQIINSIFKDDAQCNRD--LYIKTFKVVPIITNRLGTLEWVDDTEPMKS         | 3912        |
| TRICHINELLA   | DLRQDERVQQLFDLMNGILKQHQCSRLK--ARIRTYRIVPLSIKLGLEIFLPNVVPLQQ          | 3665        |
| HETEROSTELIUM | DLRLDQRIEQFLFVMNEILKRDIPATSKRG--LHKTQYQVVPMTGKVGILEWLDNTPKLE         | 3840        |
| GLOMUS        | DLRLDQRVQQLFSLMNGILKKSDFCSQRN--ITQRTYKVVPIITGHLGILEWINNTPMRY         | 3767        |
| MOSS          | DLRLDQRIEQFLFEAMNNVLRDAACSQRK--LAIRTYSVIPVSKKCGLLQFVENTCVLQE         | 3757        |
| TERMITE       | DLRQDQRIEQFLFNLMNKILDQDPTCRHRN--LSITTYQVPLSSHGLIQWVDGTEALKG          | 3687        |
| SALPINGOECA   | DLRTDARMEQLFAVMNQALAADPACGERG--LSLRTYNVVPMTRIGMLEWVPNSCVFKE          | 3882        |
| ROTIFER       | DQRQDQRVIEILLDIINNLLKSDSKCYQRN--LSIKTYQVVPMTSKLALIEWLPEKPLKV         | 3752        |
| SHRIMP        | DLRTDQRMQMFTELMNSIYARSPICTKASSVPSLDTYQVIPLSLRVGILQWVDSTQPLKD         | 3771        |
| SCORPION      | DLRQDSRIEQFLFDMNDIYQCNATCFQNG--LKLETYQVIPLTKIGLEWVDNTNVLGS           | 3800        |
| SPONGE        | DLRLDQRIEQFLFETMNKVLSDDPICSRQR--LNLRTYSVIPVTPRVGLIEWVRNTMPLKD        | 3853        |
| <b>HUMAN</b>  | <b>DLRQDQRVIEQLFQVMNGILAQDSACSQRA--LQLRTYSVVPMTSRLGLIEWLENTVTLKD</b> | <b>3814</b> |
| ESHARK        | DLRQDQRIEQFLFEVMNIIILSRDAACSQRS--LQLKTYQVIPMTSRLGLIEWLDNTCTLKD       | 3829        |
| LIMPET        | DLRQDARIEQLFVIMNKVFDKDPVCRHRK--LHLKTYQVIPMTPRVGLIEWMNNTPPKLD         | 3769        |
| LINGULA       | DLRQDQRIEQFLFYIMNRVFSQDPDCKPRQ--YKLRTYQVIPMTTKVGLIEWVNQTKTLKE        | 3805        |
| TRICHOPLAX    | DLRLDQRIEQFLFCVMNEILAQDSICSQD--LRLRTYQVIPITQRLGLIEWMKNITLKE          | 3819        |
| STONYCORAL    | DLRLDQRIEQFLFGLMNDIMANDSACSQRG--LRLRTYQVIPMTPRVGLIEWMNNTPKPLK        | 3858        |
| STARFISH      | DLRLDQRVIEQLFRIMNSILEQDSTCSQQG--LQLVTYEVIPMTPRGLIEWAQNTPKLE          | 3879        |
| LANCELET      | DLRQDQRIEQFLFIMNDILTLPACSQRQ--LRIRTYQVIPMTSRVGLIEWMONTTPLAG          | 3889        |

\* \* \* \* : : : \* . : : \* : : : : . : : \*

|               |                                                                       |             |
|---------------|-----------------------------------------------------------------------|-------------|
| APHANOMYCESE  | IVEQEMSTTKKS----NLL-----QSPPGQLYENFWSKQ-----RGKTYGQ                   | 3429        |
| FLATWORM      | FLVHQMSAAEQRSKSKQ-----SLDYCKFV-----S-----NDHCK                        | 4131        |
| STYLONCHIA    | LINREHMRNEAGKD---LN-----QSRALNERRKWLKSSVPGNA--KKEGITDQHI              | 3958        |
| TRICHINELLA   | FFMEESLRKQYQ-----T--IAMEMFTGPEKI---LLKAAGEGS--SPLNHLTYWR              | 3710        |
| HETEROSTELIUM | IIEDQMAVHQNVRSNVLSL-----RMEAYKIHNEWINSFGKYIKMANPPAGPLYQQ              | 3892        |
| GLOMUS        | FIEREPRTSKV-----FDDAQSMHSRWVQY-----KSYHN                              | 3798        |
| MOSS          | VIRGLSSKLASRTHIEGYKPLQATSETLLKEIQHEYIEWVRKKGGG----KSQTECYCN           | 3812        |
| TERMITE       | LMLGVLDKNEKE----SYKK-----SCEEHCKWISKPCNP----QCSFYEKYGE                | 3728        |
| SALPINGOECA   | MINLGMTDAERE----DAKKRKA-----TQLPQNHFSSQFANRFSKD----PSPLKMYSS          | 3928        |
| ROTIFER       | IENDLVNEAQN---NYAE-----FIYGINKDGS--KKTQSEVYGM                         | 3788        |
| SHRIMP        | FINDSYRENETK---CYGE--A-----RAL-----YG-K-----NENYT                     | 3799        |
| SCORPION      | FLKDAMTDKEKE----SFRE-----SDPKMTFYKFLSKTNS-R--DKSIPLLYEN               | 3844        |
| SPONGE        | FIQLSDPEKK-----SL-----PAASKMNQKWLEQKFGG----SNVNVWYIE                  | 3891        |
| <b>HUMAN</b>  | <b>LLLNTMSQEEKA-----AYLS--D-----PRAPPCEYKDWLTKMSGK-----HDV--GAYML</b> | <b>3857</b> |
| ESHARK        | FLSSNITEETQS-----RR-----QDEVLPKYREWLLQKMGAR-----KDMFLRYPT             | 3870        |
| LIMPET        | FVYGALTEQERK---YILG-----DQGPQKHENWTKYKFDK--K--KRCIKSMYQK              | 3814        |
| LINGULA       | VVYGTMTQEKEA---Q-----QKAAILQRNFLSRYGNP--S--DPNICKKYWG                 | 3846        |
| TRICHOPLAX    | FVTDAMEDHEKQ---HYLS--S-----QNSPHQLYSKWLKGFSA----GGPVYMYQS             | 3863        |
| STONYCORAL    | VLNSAMTKAEND---HYIG-----PNGAGACYRNWIDKFKGDDR---NPSRFYGE               | 3902        |
| STARFISH      | FLHLMAMTEQEGN---AYNS-----RHGPRYQHSEWVDKYAKG--N--QSNHGVRVYGA           | 3924        |
| LANCELET      | FLENAMTTREQE---AFLH-----QRLPLIDFDAYVHRLGGTVK--NDPWGKVVYGS             | 3935        |

..

Supplementary Figure 4: CLUSTAL All phyla small

|               |                                                                    |             |
|---------------|--------------------------------------------------------------------|-------------|
| APHANOMYCESE  | KIATASSAVTLVVSQAQEMVPMDLIRRHVLNMAQTPAFFQLRETFSTSLAAFNGCSYI         | 3489        |
| FLATWORM      | LYTLSDQVQVQRNFQPLLDVCPDCLLARGLRQLSSSWEAYYAMRDTLVRSHAMCGAHWL        | 4191        |
| STYLONCHIA    | CLLGCDEKIVIEGFNKHKEAIPWYLLRRNGLENCLTSSAFLAIKNQFTKSLATFSIASYL       | 4018        |
| TRICHINELLA   | SFQNIPTETAARCFNEVLKKIPDHLLRDQLLNCCVSPDVFCFLRQKFTVSLASMCIANYL       | 3770        |
| HETEROSTELIUM | MFMHSDRADAIKKQEKQHDKVPANLLQNGIWAISSSPEYLFIRNSFARSLATFSICSYI        | 3952        |
| GLOMUS        | MFMEVNRDAVVQHFKDLQREISNDMLKKALYKLSSTPEAHLISIRSEFIKCHAVINICGYL      | 3858        |
| MOSS          | LYRKVGFEEVSLKLSALQGQLPMDTLRMGFSRLVTSAESYLAALRSQFARSLSVTSCIGYV      | 3872        |
| TERMITE       | AHMKYSPEETSAEFRKKVNMIPWDMRRALQRLSVSPESYFILRQSFACSYAVLCIAHWL        | 3788        |
| SALPINGOECA   | VMTKAKRSDISRSFLERQALVRPTLLRDALLHLSTTPEAYLTTFRQLFGRTLATMNICQYI      | 3988        |
| ROTIFER       | VYAKYSRELICREFDKIQNSIPWDLFRQFLRTLSSDSEAYFVLRNEFIKSYAVASTCHYI       | 3848        |
| SHRIMP        | VAKKAKRDKVIKAYEEVNVNIPWDLRRGLVRMSSSTEGFFSLRSFAVSYAALCISQWL         | 3859        |
| SCORPION      | IYKI-ADTEVNKKFTECINMIPWDLFRRAFKLFSSSLEAFVILRYNFITSHAVLCISQWL       | 3903        |
| SPONGE        | MYKLLKADEVKKEYRRIVSAVPWDLRRSLISLASTSEFLLRCTFTFIQSLVINICQYI         | 3951        |
| <b>HUMAN</b>  | <b>MYKGANRTETVTSFRKRESKVPADLLKRAFVRMSTPEAFLLALRSHFASHALICISHWI</b> | <b>3917</b> |
| ESHARK        | MYLKASRTETVTAFRTHEQAIPGDLRRRAFIKMSSTTPEAFLLALRSHFASHALMCSHWI       | 3930        |
| LIMPET        | VYQNSRAETIKDFRMKENKVPWDLFRRAFHQMSTSPFAFHVLRCELVVTHATISICQYF        | 3874        |
| LINGULA       | MYERCSRTEAVKSCQDKENSLPWLDRRAAYLQMSSTPEFTYTLRRHFATSHALLCICHYI       | 3906        |
| TRICHOPLAX    | MYRKAKRSEVENHFKFRENSVPWDLRRGFVALSASSEAYLMLRSHFARTHATVSIHYI         | 3923        |
| STONYCORAL    | MFKKANRTETERSFTQKQALVPWDLRRAFQLAVSPEAFFILRSHFASHACLICQYI           | 3962        |
| STARFISH      | VYRHANYTDTVKCFRSWEALVPWDLRRRAFIQLSASPEAFLLRSHFARSHAVICICQYV        | 3984        |
| LANCELET      | LYQKASRTDVTLAFRQVQSKVTWDMRRGYLQMSSCPEAFLLRSHFTTTHATLCIAQYV         | 3995        |
|               | : : : . : : : . : .                                                |             |

|               |                                                                                                                            |             |
|---------------|----------------------------------------------------------------------------------------------------------------------------|-------------|
| APHANOMYCESE  | LGI <b>DRHLDN</b> FLLDYITGTVV <b>GIDFG</b> ISFGSGASMLPV <b>PELVPRFR</b> TRQLQGVLPHN-A                                      | 3548        |
| FLATWORM      | LSV <b>DRHMSNY</b> MLCLDSGKMI <b>GIDFG</b> YAFGTATIFLPT <b>PELVPRFR</b> LTRQICGAMGPLPPS                                    | 4251        |
| STYLONCHIA    | IGI <b>DRHLEN</b> FLLDTSDE <b>ELGIDFG</b> IAGSGSIQ-LGI <b>PELMPFR</b> LTRQIEGVIAPHP-L                                      | 4076        |
| TRICHINELLA   | LEI <b>DRHLEN</b> IVLDTKT <b>GEVIGIDFG</b> YAFGASLQYLPI <b>PELMPFR</b> LTRQFVGVVDVPG-M                                     | 3829        |
| HETEROSTELIUM | IGI <b>DRHLEN</b> FLLSQKDGIL <b>GIDFG</b> HAFGTAT <b>Q</b> FLPI <b>PELMPFR</b> LTRQFTSFLMPLD-S                             | 4011        |
| GLOMUS        | IGI <b>DRHLEN</b> FLVDTTK <b>GLSISIDFG</b> HAFGSAT <b>ETLNI</b> PELIP <b>FR</b> LTRQIETLMEPLG-S                            | 3917        |
| MOSS          | AGV <b>DRHLCN</b> TLVDMRT <b>GALVPIDFG</b> YSFGTNNVLLLPV <b>PELVPR</b> LTAQLKNFLLPLT-A                                     | 3931        |
| TERMITE       | LGI <b>DRHLSN</b> ILVSVKDGRCV <b>GIDFG</b> SAGTAT <b>Q</b> FLPV <b>PELMPFR</b> LTPHIVSLLQPLE-E                             | 3847        |
| SALPINGOECA   | LGI <b>DRHLSN</b> MI DLRT <b>GVVIGIDFG</b> HNFPSAT <b>Q</b> ELPI <b>PEMIPFR</b> LTKQLEAVFLPHK-K                            | 4047        |
| ROTIFER       | LGI <b>DRHLSN</b> MI DLKT <b>GRAIGIDFG</b> IAGFHAMNIPV <b>PELVIR</b> LTRQILKLIAPLE-Q                                       | 3907        |
| SHRIMP        | LGI <b>DRHCSN</b> SLVSLKT <b>GRVIGIDFG</b> HHPESAV <b>Q</b> FLPV <b>PELMPFR</b> LSPIVNVFQPIG-Q                             | 3918        |
| SCORPION      | LGI <b>DRHHTGN</b> FLVSTTT <b>GIEVIGIDFG</b> HAFGTAT <b>Q</b> FLPI <b>PELVPR</b> LTRQYLNLMPLK-E                            | 3962        |
| SPONGE        | LGI <b>DRHLSN</b> FMVDMET <b>GVVIGIDFG</b> HAFGSAT <b>Q</b> FLPL <b>PELMPFR</b> LTRQFVNLLPLHK-V                            | 4010        |
| <b>HUMAN</b>  | <b>LGI</b> <b>DRHLSN</b> <b>FMV</b> <b>AMETGVVIGIDFG</b> <b>HAF</b> <b>GSATQ</b> <b>FLPVPELMPFR</b> <b>LTRQFINLMLPMK-E</b> | <b>3976</b> |
| ESHARK        | LGI <b>DRHLSN</b> FMVNLET <b>GMVIGIDFG</b> HAFGSAT <b>Q</b> FLPV <b>PELMPFR</b> LTRQILNLMPLK-E                             | 3989        |
| LIMPET        | LGI <b>DRHLSN</b> FMINLKT <b>GMVIGIDFG</b> HNFPSAT <b>Q</b> FLPV <b>PELMPFR</b> LTRQIINLTLPLG-I                            | 3933        |
| LINGULA       | LGI <b>DRHLSN</b> FMVDET <b>GMVIGIDFG</b> HAFGSAT <b>Q</b> FLPV <b>PELMPIR</b> LTRQILNVMMPLR-E                             | 3965        |
| TRICHOPLAX    | LGI <b>DRHLSN</b> FMIDRLT <b>GMVIGIDFG</b> HAFGSAT <b>Q</b> FLPL <b>PELMPFR</b> LTRQMLNLMPLR-E                             | 3982        |
| STONYCORAL    | LGI <b>DRHLSN</b> FLVDMET <b>GMVIGIDFG</b> HAFGSAT <b>Q</b> FLPL <b>PELMPFR</b> LTRQFVNLMPLK-K                             | 4021        |
| STARFISH      | LGI <b>DRHLSN</b> FLISLKT <b>GMVIGIDFG</b> HAFGSAT <b>Q</b> FLPV <b>PELMPFR</b> LTRQIVNLMPLFK-K                            | 4043        |
| LANCELET      | LGI <b>DRHLSN</b> FMIDLES <b>GMVIGIDFG</b> HAFGSAT <b>Q</b> HLPV <b>PELMPFR</b> LTRQMLNLLPLK-E                             | 4054        |
|               | :**** * : : * : **** * *****:*:*: : *                                                                                      |             |

Active site                      Mg<sup>2+</sup> binding site  
DXXXXN                              DFG                      T3950

|               |                                                                                          |             |
|---------------|------------------------------------------------------------------------------------------|-------------|
| APHANOMYCESE  | KLLFQQDLAAVLEALRGQHRIESVMSVFLNEPILLEWQVTVKKSRRDKD-----                                   | 3598        |
| FLATWORM      | QGAFVRCGLGHCLAALRRERELVLSVLQVFINVSAADWKQLAGMLTAAHRESSAAWDTSEH                            | 4311        |
| STYLONCHIA    | EGVYKQTMVHALNALKHKRSLIMDTCEIFVKEP <b>LLDWV</b> KDAKQRQKNGENNDNGMV----                    | 4132        |
| TRICHINELLA   | HGLESTMKYCLKAFRDSSYILLNTMDTFVKEP <b>SLNWI</b> VEARRQIGEGRT-----                          | 3879        |
| HETEROSTELIUM | VGLLSHNMHTLTAIQNNKDFLLSTMDV <b>FVKEP</b> LIDWIKLASRLGKEQ-----                            | 4059        |
| GLOMUS        | KGLLEYPMIKILQIMQANKDILLNSMID <b>FVKEP</b> LLDWLNRANDQAKQKDRNSNE----                      | 3972        |
| MOSS          | VGLLRSDMVRIMTALRGSRLISAVMEV <b>FVKEP</b> LVDRQEAVKLQRRARARDVSK-----                      | 3985        |
| TERMITE       | TGLFRETMIHCLRTLNNYDMLLATMEV <b>FVQEPS</b> LDWLEFASRHESLN-----                            | 3895        |
| SALPINGOECA   | EGLVQEVMVHVLRALKANQRL <b>LLSTMDVFIKEP</b> SL <b>EWQQAR</b> -----                         | 4089        |
| ROTIFER       | RGLFESSMVHCLKALRENNDLVLCILD <b>VFIKEP</b> SIDWIGSAVKIAKKN-----L----                      | 3956        |
| SHRIMP        | VGMLKEIMVSALGALQESRHVLTAVLE <b>AFVKEP</b> TKDWLDFVQKQEGDT-----                           | 3966        |
| SCORPION      | KGVI <b>EATMISALSAL</b> RDNADILLNTMD <b>IFIKEP</b> TVNNQENALKQKRIIGKVDENV----            | 4017        |
| SPONGE        | SGQLRSCMIHTLRALRHSPTLLNTMD <b>VFIKEP</b> SL <b>EWESNAKQ</b> ALAQ-----                    | 4058        |
| <b>HUMAN</b>  | <b>TGLMYSIMVHALRAF</b> RS <b>D</b> PGL <b>LNTMDVFIKEP</b> SL <b>DFWKN</b> FEQKMLKKG----- | <b>4024</b> |
| ESHARK        | SGLIRSIMVHGLRAF <b>RLDP</b> LLSTMD <b>IFVKEP</b> SL <b>DWKN</b> LELKQMKKG-----           | 4037        |
| LIMPET        | KGLLENTMIHTTRALRQDYDLLVNTMD <b>VFIKEP</b> SV <b>DWLN</b> F <b>AEKQ</b> RNEM-----         | 3981        |
| LINGULA       | KGLIESTMVHALRALRANYDLLNTMD <b>VFKD</b> LS <b>VDWLA</b> FAEKQLQTT-----                    | 4013        |
| TRICHOPLAX    | NGQLKCSMVHTLRALRNKPDLLVNTMD <b>VFIKEP</b> SL <b>DWQN</b> FANRQNAKQ-----                  | 4030        |
| STONYCORAL    | SGTLQSVMIHTLRALRSNHDL <b>LLNTMDVFIQEP</b> SL <b>DWQV</b> YARKQAKTQ-----                  | 4069        |
| STARFISH      | EGILQSSMVHTLRALRQNHELLINNTMD <b>VFIKEP</b> SL <b>DWKT</b> NASKQAKAQKQDAGRVL----          | 4098        |
| LANCELET      | SGLLQSTMVHVLRALRSPNVLLINNTMD <b>VFIKEP</b> HL <b>DWKN</b> FAAKQMD-----                   | 4100        |
|               | : : : : * : : *                                                                          |             |
