# Supplementary material for: Uncovering DNA-PKcs ancient phylogeny, unique sequence motifs and insights for human disease
Source: PubMed Central journal article supplement — Prog Biophys Mol Biol. Author manuscript; Available in PMC 2022 Aug 1. (PMC8021618; doi:10.1016/j.pbiomolbio.2020.09.010), 2020-10-06
Supplement: NIHMS1638735-supplement-6.pdf [file NIHMS1638735-supplement-6.pdf]

Supplementary Figure 5: COBALT analysis DNA-PKcs from representative examples from all major phyla (short list)

**Supplementary Figure 5: COBALT alignment of representative DNA-PKcs sequences from all major phyla/short list.**  
 Conservation setting 2 bits. See Supplementary Table 1 for more information on sequences and organisms.

| Sequence number | Sequence name | Descriptor               | Scientific name                   |
|-----------------|---------------|--------------------------|-----------------------------------|
| Icl Query_10001 | CAPITELLA     | Annelid worm             | <i>Capitella teleta</i>           |
| Icl Query_10002 | STARFISH      | Crown of thorns starfish | <i>Acanthaster planci</i>         |
| Icl Query_10003 | LANCELET      | Belcher's lancelet       | <i>Branchiostoma belcheri</i>     |
| Icl Query_10004 | HUMAN         |                          | <i>Homo sapiens</i>               |
| Icl Query_10005 | ESHARK        | Elephant shark           | <i>Callorhinchus milii</i>        |
| Icl Query_10006 | LIMPET        | Owl limpet               | <i>Lottia gigantea</i>            |
| Icl Query_10007 | LINGULA       | Brachiopod               | <i>Lingula anatina</i>            |
| Icl Query_10008 | TRICHINELLA   | Parasitic roundworm      | <i>Trichinella pseudospiralis</i> |
| Icl Query_10009 | AMOEBA        | Slime mould              | <i>Heterostelium album</i>        |
| Icl Query_10010 | GLOMUS        | Fungus                   | <i>Glomus cerebriforme</i>        |
| Icl Query_10011 | MOSS          | Spreading earthmoss      | <i>Physcomitrella patens</i>      |
| Icl Query_10012 | TERMITE       |                          | <i>Cryptotermes secundus</i>      |
| Icl Query_10013 | SALPINGOECA   | Choanoflagellate         | <i>Salpingoeca rosetta</i>        |
| Icl Query_10014 | ROTIFER       |                          | <i>Brachionus plicatilis</i>      |
| Icl Query_10015 | SHRIMP        |                          | <i>Penaeus vannamei</i>           |
| Icl Query_10016 | SCORPION      |                          | <i>Centruroides sculpturatus</i>  |
| Icl Query_10017 | SPONGE        |                          | <i>Amphimedoa queenslandia</i>    |
| Icl Query_10018 | TRICHOPLAX    |                          | <i>Placazoa</i>                   |
| Icl Query_10019 | STONYCORAL    |                          | <i>Stylophora pistillata</i>      |
| Icl Query_10020 | OOMYCETE      | Plant mildew             | <i>Plasmopara halstedii</i>       |
| Icl Query_10021 | FLATWORM      |                          | <i>Macrostomum lignano</i>        |
| Icl Query_10022 | STYLONCHIA    | Ciliate                  | <i>Stylonychia lemnae</i>         |

Supplementary Figure 5: COBALT analysis DNA-PKcs from representative examples from all major phyla (short list)

|             |     |                     |                                        |                                        |     |
|-------------|-----|---------------------|----------------------------------------|----------------------------------------|-----|
| Query_10001 | 1   | MA---RA             | LQEQLAGLVSDTR---GQPG-vVNARISHES--      | -IGNIGAIc-LNDV-NASDvDLAY-SVIFN         | 57  |
| Query_10002 | 1   | MA--tAD             | LPVKLSENLGLIS---TKSG-lHVAEKAQD---      | LVVdLGHLC-LRQL-SENELAYCC-SQLFN         | 58  |
| Query_10003 | 1   | MAG-sGS             | LEARLSELHALLA---ESDH-gHGAveAHN---      | LVADIAQIC-LRHt-AERDvAYCC-SVLFQ         | 59  |
| Query_10004 | 1   | MA---G-             | --SGAGVRCsLLR---LQET--LSAADRCGAAL[     | 4]LIRGLQbEC-VLSS-SPAVLALQT-SLVFS       | 60  |
| Query_10005 | 1   | MA---GP             | RGAAADTLsAFSK---LHHL--LSLSDVKsAAA[     | 4]AVGSISRDFrCSSS-SDSQLALQS-SMVFS       | 64  |
| Query_10006 | 1   | MA--sGL             | LEESLRDLHANLK---D-----GGQSELDQID[      | 1]IVPTLSQIC-LHEI-TEKDidYCS-SVLFd       | 57  |
| Query_10007 | 1   | MA---GN             | LQDLLCTLHsCVG---GEEEdaRGGRKTFD---      | LVRDIANLC-LKET-SDRETDYCS-SLLFN         | 58  |
| Query_10008 | 1   | MAY---S             | --STVDRIRDALN---SLKD-fIEGADSDQAE[      | 1]-VQQIFNHfKLNg-SERNFGFCfnSLLS         | 59  |
| Query_10009 | 1   | [4]MNN-vds          | [4]IDGYLVKLHQsvGgttSTStAtTATAAITsAS[   | 15]LIEQLSNVv-LKEL-AEDEIGVAA-SLLF       | 89  |
| Query_10010 | 1   | MSG-LDT             | LQKCLQELANCRQniv-QKS---SPGEAVGEAL[     | 2]-SQDIDHIV-SNDI-EDQELGLAT-QLLFD       | 63  |
| Query_10011 | 1   | MDK----             | [1]LGSCLASLRDAADsvr-----SSGGFVDLAP[    | 1]-VVDfSELC--KDLySDEIdSYAI-AIVFD       | 57  |
| Query_10012 | 1   | MMG--s-             | ---ELIGFVvVIN---SCIS---GNHLNKYIEAK[    | 1]NISNIISYfEdKRRkrTDL--DGAF-TVLFd      | 57  |
| Query_10013 | 1   | MAA----             | ARSELERLcRNLE---EQRl---SASPRRFIAA[     | 2]IVADIAAYT--RTLTPPELALAA-SILG         | 59  |
| Query_10014 | 1   | MND----             | LEKHlQNLFDsLS---NSNV-----DAAKSI-       | -VLDIVYLcGEN-L-NPOTITFCL-SLFFK         | 52  |
| Query_10015 | 1   | MAG--GG             | REEE DLLLGLKlQ---SFGP--GNGQGDpDAAK[    | 1]VIVDIAEELaVDL--TPAQYDLXI-SQVLG       | 61  |
| Query_10016 | 1   | MNEitNS             | LHENILKLNDFIK---YQKD-----EGHSSiY       | VIKDISEIClRGTl-SEKDRSYVC-SLILR         | 59  |
| Query_10017 | 1   | ME---SR             | IESLWESLHSSp---QRYS-----YATEVAS        | ---DLYSLC-VEQI-TESELAYSS-SVLFN         | 52  |
| Query_10018 | 1   | MA---SN             | LSQLLIDLHALLN---LQSL--HRGSNACDIAS      | ---DITVLC-LQTA-SDAEKAYCS-SALFG         | 56  |
| Query_10019 | 1   | MS---DL             | LNRYLTHLHSLPS---LDAP--HCGLDASNTVV      | ---DLGSPC-LENV-SSEEQAYYS-SLLFS         | 56  |
| Query_10020 | 1   | MTT----             | [1]LNERLEELTAFLLh-----AQAVESIDETL[     | 2]LRLEVSEAMiLSRA-SAQQCtILL--FOsA       | 58  |
| Query_10021 | 1   | MSS--DD             | [4]-----IDKFLKdp-----ELKESKA[          | 1]----FNVI fNEFASsNENFKHKYlAlLFD       | 51  |
| Query_10022 | 1   | MEQ----             | [1]IDELLRQLHKFLF-----A[                | 4]VVNELRIYlIDESL-KEADLAFIS-SKIFN       | 50  |
| Query_10001 | 58  | HETGLIKFLKkIIQND    | EF---EG-C--KCEILkELLKTFISKf-PGKVH--    | PYAVDVKDAcLQL-ITRRRRARVKNNATPL         | 127 |
| Query_10002 | 59  | KDNGILVFLNKAIpKDEL  | ---KG-S--KEQLLEFLHAPLLKA-GSRLL--       | ARTVEIKKICISA-FMRDKSAKVKTKTPPV         | 128 |
| Query_10003 | 60  | ESTGITAFLRKtVTLdQY  | ---LP-A--KVTElSFLLAFLKlEIK-GRKIQ-      | PHAVEKKEVCMAV-FSRDRlSRVKCATFPV         | 129 |
| Query_10004 | 61  | RDFGLLVFVRKSLNSIEF  | ---RE-C--REElIKFLCIFILEKMG-QQKIA--     | PYSVEIKNTCTSV-YTKDRAAKCKIPALDL         | 130 |
| Query_10005 | 65  | KDTGLLVFLRKSrLrFEF  | ---RD-S--REDVLLKLLSEVVERI-GEAVG-       | RYACDIKGTcVvV-YTKKAAKCKAAALDL          | 134 |
| Query_10006 | 58  | KEIGVTFFLQKlSKKNEY  | ---QG-SnaKGLLELLSDFIHKV-GKKAL--        | PYLVEIKEASLNS-ymTDRFTKlKSSALPV         | 129 |
| Query_10007 | 59  | KDTGLVSVFKVVKQAEY   | ---DS-T--KTAELTLCLFMERA-EKKVL--        | PYAVDIKDVcITL-FIREEKAAVKKVVIVL         | 128 |
| Query_10008 | 60  | DSNSLLSILSSIGKTAF   | ---AQ-Ti---VYGIIDIRLAIAKT-TSLSP--      | SHRKAIMRFtLRL-LKQDYlLKGRRREVLYL        | 129 |
| Query_10009 | 90  | GDHNLKFLERSVLINTK   | ----DmIkIKTSILNLI SKLIKSF---KLQvady    | VVPiKSICISL-FRRDQSPTVQAATFEP           | 161 |
| Query_10010 | 64  | PQIGIKFPLNDTSrVTDsv | ---lAkaKIALLEFLFLYIRKI-QSDIE--         | PYTEIiKKNVFGI-LNVdDEAFVKAASFp          | 135 |
| Query_10011 | 58  | EDTGIFLESLLRVRDK    | ----SvVraEScSFLALPIKIKI-GPRALh--       | YAALLKEKSLTF-FRREDSKSVQAAALTP          | 129 |
| Query_10012 | 58  | KKTGILQFIQKALQDAP   | ---TE-A--IKESFTLLKQLIDVF-KERMS--       | CHVVQIKDLCKTC-ILLEKKAEBKDKAFDV         | 127 |
| Query_10013 | 60  | SDQGVLSFLRQ-lGLELY  | ---EE-C--KVAALEFLAGFIQRlpADRLT-        | PYAVRIKDTCLTC-F-RDKRAKVKSLSPK          | 128 |
| Query_10014 | 53  | REKNLLTFLRKTITRDEF  | ---RG-C--KVDLLQFLKFKITSa-EKKIL--       | PYSPDIKDTcILL-FSSDKYSDVRCATFSI         | 122 |
| Query_10015 | 62  | EK-GITfFRGSVSKDQSF  | ---VE-A--KkSTLDVLTLLDKB-AQKIN--        | KVVDIRKYTLYL-YNVEKSTKvQAAALeV          | 130 |
| Query_10016 | 60  | KEDGFLHFLEEAVNTFSL  | ---KD-S--LIEALQFLNLFLINI-GNKVV--       | QYGI TVKDVVFSI-FLRNQLAKVKILALSA        | 129 |
| Query_10017 | 53  | PDNGILKFLHDVTTLEEF  | ---AS-C--KEBELKLLSNVFNKL-SRRVL--       | SHIVPITDVcVFI-FMREKSAKVKNATLNL         | 122 |
| Query_10018 | 57  | QDYGVVTFLRKSlGLDDL  | ---DK-C--KEDLLKLIATYMEKI-GGKIS--       | PYAVQIKDVcISL-FTRDKAARVKNATFPF         | 126 |
| Query_10019 | 57  | GETSIVSFLRKVITLDEF  | ---QD-A--KIEELLKFLQSVYMKM-GKKIN--      | PYVVEIKDICLKI-FSQDHSNKAKAETLPL         | 126 |
| Query_10020 | 59  | EPPSLRFLRSTSAETFD   | garkReiSaaRIGVPELLSAPLKVYgAHSALsk      | QHVIdIYKVCQQT-ARSDPFNRvKAQALNV         | 137 |
| Query_10021 | 52  | EPEGLVYRlQSKKEVSEDA | -----KDGDLFTTKLIQASpALLATs--           | LPKVKCLAESLlFSSISSAKVRIASLNC           | 119 |
| Query_10022 | 51  | SNSLLEFLRENSLHNDK   | l---iSsvKkVYELIIdYlKLR-SQEAT--         | PYLKLLKDTCLRS-FRSDHNSLVKESsLQL         | 122 |
| Query_10001 | 128 | LIEL                | LKQTSGL-PVAGDLQVEGMIERLFKELIK-SPKP-AA- | SVKAHIFHLGVIaELFPPEKMv--RGSdKLL--NL    | 196 |
| Query_10002 | 129 | LIEL                | LQRSASA-QMEADLIPKMIELyFQQLMQ-PSKL-SQ-  | TVKQGIYCLLGVLaEiYpVLM--sGYSERLL--SV    | 197 |
| Query_10003 | 130 | LKKV                | LQLTIHS-QLGDELrVSDMVDRLFLELTM-RSQT-TA- | TVKSGALSLLGVISeVYpDLMVqkDHPDRLL--Kv    | 200 |
| Query_10004 | 131 | LIKL                | LQTFRRSS-RLMDEFKIGELFSKFYGLAL-KKKI-PD- | TVLEKVYELGLLGEVHPSEMI--NNAENLF--RA     | 203 |
| Query_10005 | 135 | LITL                | LHsKLSs-SCLQFKIGELFNKFGDLSQ-KSKF-PD-   | TVLEKVYELGLVLaEVQPTEmL--HNSEKLF--CA    | 209 |
| Query_10006 | 130 | LIKV                | LELSVGS-NMGEDLKIQKfIEKPFMELTK-ASKL-TA- | TVKGIYMLGVIcEiYpEYMT--TDSTKLL--DI      | 198 |
| Query_10007 | 129 | LILK                | LELTegS-QMSEELNMRMElEFLMELSR-KTKH-QA-  | SVKRELYKLGIFAEVYpEGMv--NYAERLT--DL     | 197 |
| Query_10008 | 130 | ANEC[3]             | -SSVLStESELNfCYDELLHCLLALIDS-LKKL-QN-  | GVKGLFIIIGSLCQEIPEKLIaDYNVALLfAnI      | 205 |
| Query_10009 | 162 | IQKI                | LHMkLTdNINPEVfGVREMSDlLLQFTc--GKL-TQ-  | TVKAELLETVGLFTeYFTGIMF--DKSAQLIs--I    | 230 |
| Query_10010 | 136 | MMAM[3]             | ----SKRiIDPEKLNVRDIISRYLIEFFV-RTKGT    | SgVKAkAGALDMLGIaHRFPeYVdf--EKNKILr--V  | 206 |
| Query_10011 | 130 | LIVL                | LELNMAR-LKPAMFAVDQELSTLLMLeFR-KAKT-NS- | TLKANIiQLLGDLIeYFRSfPE-eENVLAILk--L    | 199 |
| Query_10012 | 128 | IQSV                | LEN-GPW-ND--NLNVDELFDKlINPFKSnKSN      | TmPA-KVVQKHLHlGIIVHkYpECLR--PEETRLl-Rl | 196 |
| Query_10013 | 129 | LIAL[5]             | lFTDENrgQLLEKADDLKkYFDPFKSsASKL-TQ-    | TVKRDMLHaIGLIISLSPAFAA-sSLSTSVL--NV    | 205 |
| Query_10014 | 123 | ISKI                | LELTkGEyEITAKMNIpKLADYfLSLAN-QSKL-SS-  | SIKANILSILGRICWYHPeVIS--SKSNKCL--EL    | 192 |
| Query_10015 | 131 | FCTL                | LAKCGSH-IDIQEINVDQFIERLICDIRSakGST---  | VLQHQLTGLGMLMSYpQNLR--HQSPILl--KI      | 197 |
| Query_10016 | 130 | LIKV                | LELCsGaiS-SEQFNlQKiVnKIIEYLaQsSki-TP-  | TVKQAYYLLGISSRHYPdCMQ--LCSERLL--NW     | 199 |
| Query_10017 | 123 | LINT                | LELCGKT-EYSHDLIPKIADKFFQaALL-PTKH-SA-  | TRGGYHLLGVLCEWfPPEHLV--KISSRLI--DI     | 191 |
| Query_10018 | 127 | LLQL                | LSSKLSHS-SVVELAISKLVdKYMCAcKQ-PTKY-SS- | TVKSGMYSLLGTIAEKfPEYIM--PHAQQLL--TI    | 195 |
| Query_10019 | 127 | MAEI                | LDVKLES-SVVEKLDVpKIFDKYfGACIQ-pVKH-SS- | TVKYWfSLlGTIAKfVPEcVI--SHSDHLV--KH     | 195 |
| Query_10020 | 138 | VVNA[3]             | ----AHKhTTSDEIEPRAYVEKfYLDIQY--SKA-AQ- | TVKGMLKVIGYLVKfSaelK--KTVSPllG--W      | 205 |
| Query_10021 | 120 | LSIC[3]             | ----AVGSsVDGNQNLVNGQLCERLrLEVQg--RQ-   | TSeGVTQGLYRALGSICKHYpEeFQ-----PVAv-KI  | 185 |
| Query_10022 | 123 | LIKI[4]             | ----NSKEIEEMRPNDMMVMLLDEIKL--RKP-SA-   | TVKGTITWlIGLLHEKYEQLNdfkVESQDVGf--     | 191 |

Supplementary Figure 5: COBALT analysis DNA-PKcs from representative examples from all major phyla (short list)

|             |     |                                                                                    |                                                                           |     |
|-------------|-----|------------------------------------------------------------------------------------|---------------------------------------------------------------------------|-----|
| Query_10001 | 197 | YMTTLK-                                                                            | QETI-SKTHEPEYVLIAGCLOGLTHFMVNFTQSADDEGAEHAY---SIVKYCVKTM-DQNIK--KRYEMP    | 265 |
| Query_10002 | 198 | YIATLN-                                                                            | QQMT-SKTRKPELTVIAGCCLTGLGHLVNFNFTQSVEEGAKHSK---DIYRFARMAI-DPTVD--HTRYELN  | 266 |
| Query_10003 | 201 | YISMLK-                                                                            | EQME-SRTRKPEMLVIGCCLGELTHFLVNFNFTQSVEEGSAHSK---DIYNFTRRAV-SPQVE--MARYDVP  | 269 |
| Query_10004 | 200 | FLGELK-                                                                            | TQMT-SAVREPKLPVLGACCLKGLSSLLCNFTKSMEDPQTSR---EIFNFVLKAI-RPQID--LKRYPVP    | 268 |
| Query_10005 | 204 | YLNELR-                                                                            | VQMT-SATREPKFLVVGCLRGLTALMNFNFTKSMEDPKASK---DIFDYALKAI-NPQID--LKRYPVP     | 272 |
| Query_10006 | 199 | YKSSLK-                                                                            | SQMM-SKTNKPEMTIISGCLLELTSYLVNFNFTQSAGDD-S-CY---YIVKYCKMAL-KQSTT--LTRYEVP  | 265 |
| Query_10007 | 198 | CVRTLQ-                                                                            | AEMN-KKTGKPEIPVMTGCELEALSSILNFTQSAAEG-KHSY---DIFKTRMAL-NLEET---ARYDLT     | 264 |
| Query_10008 | 206 | MSEELKN                                                                            | -QMC-SSISHSYSVIIGCFLGLNLLAHFNFLNFDGACRMSCS--ELFNLLKKAC-NPKND--VHRLGHL     | 275 |
| Query_10009 | 231 | FMETLGS                                                                            | -QLK---SKTPETFILKSSLLGLSSLLNFTSSDFISGSSKNVql--LYQYLYICL-DPVSS--QRFDIP     | 298 |
| Query_10010 | 207 | FLANLKE[1]                                                                         | -SLT-----DAAFGLYSFLFAYSDSIKKENQDAY---IFKCMNSTtMVEND--RTYSIV               | 264 |
| Query_10011 | 200 | CLDTLEE                                                                            | -QLQ---KSPQLVLMAGAIKCLDSLMMWFNDSLPAAGGSVnsr-RVFTCIEQVL-WPREE--LKRYPVL     | 267 |
| Query_10012 | 197 | YLSELEM                                                                            | -QTS--HATAVKYQIIAGCLNGLTEFLYVFP--LKPQEKEAR---RIYDCVTAVA-RKHKE--M--RVAP    | 260 |
| Query_10013 | 206 | YLSELRK                                                                            | -QMT--GTKAPELPTVIGCFRGLTAYLKNPVSQCDPSARQATpgvQIYNYVKMAI-NPDVTVkmTRFQVP    | 278 |
| Query_10014 | 193 | FLTTLKN                                                                            | -EIN-AKFRKSDLSIAGALDGLNSYLNNFVSSETSDHLRA----VFNFKLSSLSSSED--LSRYAVP       | 260 |
| Query_10015 | 198 | FKGQLVK                                                                            | -HTG---SKPDLNALAGVLRGLALYLHFFPEGIDDDPQLFT---ELYKHIIKVL-NPDLN--LPRRDAQ     | 263 |
| Query_10016 | 200 | YLKDLKF                                                                            | -HTT-SN-QKSESSIIGCLOGLNFMYPQLQDTEDEKAY---QLKFIIRIIL--SKRD--VKTYDMA        | 266 |
| Query_10017 | 192 | YMSNLK-                                                                            | SEMTvKTKKPELPISGCLYGLTAYLNNFQSASEGSVYAQ---DIYKYTRMAI-DPLAN--LTRYEVP       | 261 |
| Query_10018 | 196 | YLNTLK-                                                                            | SQMT-GKNTKLDMPVYIGCLRGLTSLYLNFTQSVEEESKYAA---DIYKYARLAI-DPKVE--LPRYDLP    | 264 |
| Query_10019 | 196 | YVSVLKL[5]                                                                         | MQMT-RKTKKPDMLIIAGCLRGLTSLYLNFTQSVEGSKFAK---DIYTYGRMAI-NPQVS--LSRYEVP     | 270 |
| Query_10020 | 206 | IEHELEK                                                                            | -QFL---STSPMMIVNGLLFALARLLKCDAGRKQNDALRK---KVYSYLLTIF-ATTNgnLSRYQVT       | 274 |
| Query_10021 | 186 | SVNVVKS[2]                                                                         | QKIK-SDHTKVFQAVIASLFEFLSNYFCHFSL---EFPDLKQ---VYHLAVKVI--AGKN--YQRYEAP     | 252 |
| Query_10022 | 192 | --QELVA                                                                            | -QMK---SEKPEIKAIIGMLKGFTHSLVG--ECTLDQDQLDA---LYVCLKTAI-QPILD--MQHKGM      | 253 |
| Query_10001 | 266 | KASLGLMAKHAQMSDYLDDDFKDLYETLSYWTNHNREMAHIGMLALEDFLVQISSALVTKV-KEGN-rkEGAVFKFFI     | 343                                                                       |     |
| Query_10002 | 267 | KAGLNMFKAHSAQFGPYLSDHQDLHEAFNKWSAHNNAVAVKAVGFAAQEAFLLQOIAELIVERA-AKRD-asDMAVFRPFV  | 344                                                                       |     |
| Query_10003 | 270 | KAALWLLAKHAAQFNEYLNNDYEDMYRKLKQAGYAALESFLKQISDMLVARH-EKENnkaDLAVFKFFI              | 348                                                                       |     |
| Query_10004 | 269 | SAGRLRFALHASQFSTCLLDNYVSLFEVLLKWCATNVELKKAALSALSFLKQVSN-MVAKN-AEMH---KNKLYYFM      | 342                                                                       |     |
| Query_10005 | 273 | LAGRLRFTLHSSQFGTCLMDNYRTVFEKMKKSCGHTNSEMKKASYSALSFLKQVAI-QVAEN-AHLH---KDKLEYIM     | 346                                                                       |     |
| Query_10006 | 266 | KAGLHLLSKHASQFNEFLIDDYEDMYDRLYFWSHHNRDILHVGCMACESFLKEVNMMSYLSFG-D-----SVFFFI       | 335                                                                       |     |
| Query_10007 | 265 | RAALTLLKRHASQFQFIYENHERLYSVLLAWSQHNNDVSSLGMEALEAFFKQMAEMLATKA-EBGH--pDRAAFAPFI     | 341                                                                       |     |
| Query_10008 | 276 | KAALSFLISRQVFRHHFLDEYSLLNECFSHWAKHYDREIKTYSLNAEDLLIRELATELITKVDSDPN--hVRSVYKYFC    | 353                                                                       |     |
| Query_10009 | 299 | RAAMVVQRHTSLFKQYLTEQSEKFFARLEEWCKHINKNRDLAFNTIDSFLQOIANELTVGNRSIES---DQATFKYFI     | 375                                                                       |     |
| Query_10010 | 265 | KTGLQYIIDHSNIFGEPFLREYKEIWOQLWKLVRHNPVRNAAFKAIWAFKQIAKVLNSATEFKEF-----DCVDYFM      | 339                                                                       |     |
| Query_10011 | 268 | KASIRLRSRHAGLFRMRLESIGIRNMHWLQESGIRNTHSNKAKIRDAALPAYDQFIHVSALVSDSRIRNA----QALYTAIV | 343                                                                       |     |
| Query_10012 | 261 | RCALGLIQAHHGGQLAKFLYDEYKWFHEFLKWLINSAGED-HKAGVSAVDVYVQVSAIILKNDT-SET---GHHVFLYFI   | 334                                                                       |     |
| Query_10013 | 279 | RAALDFALHADQFRSMIATDFELLQYLSDSCSEHNNKDIKASAFRALEAFLLQOSVAMHTKAGKSKDT---MFMGFLIF    | 354                                                                       |     |
| Query_10014 | 261 | KSALNLIKHCROFDELIYSYKEIFDRISQWSEHKNYDMKKLALYALDLSYKSLAEMIRVKSNTETD-krRL-IFKYFI     | 338                                                                       |     |
| Query_10015 | 264 | RAALELIHTHGAKFSSQLFDECTQVQWFWKCGSRNRDDHKAALPAMDTFIIVIANMLELQA-MEDD-krGVKIFKYLL     | 341                                                                       |     |
| Query_10016 | 267 | KASITLSSSHASLLAQFLYEDSMNIYKIEIWTNHSNREVRSLGYNALDAVFKQISDML--EQNYE-D-scKAIEFKFFI    | 342                                                                       |     |
| Query_10017 | 262 | RAGLSLISRHAQFREYLVKDESHMYESLSSWSNHNKKECRVAVNAIGSFFREVSTQISDPSISREL---GISNYKFFM     | 338                                                                       |     |
| Query_10018 | 265 | KAGLNLIKAHAAQFCDYISREAEALYEVIYRWCRRNRDIRAAAFHAEIEMKQIAEYLVNEN-DAAN---INIIFKFFL     | 339                                                                       |     |
| Query_10019 | 271 | KAGLYLFAKHAQFKEYIAKDYEVMYGDLYRWCKHNNKETSAYAAAAMEAFFQOISLYVGRHGDKSD---LAMFMYFI      | 346                                                                       |     |
| Query_10020 | 275 | NSAEHFLEKHAQVFHEETGNPLSAWFSYMKSCCLSDNKTVKQHFACSNISLQVLNSYLAEAKDDMRK-----KCLNKVL    | 349                                                                       |     |
| Query_10021 | 253 | QOAILLFAHCHPVSAFLADNYEVLFEQFRWSTHNRDLMHVGMALAFDAFVKSVTAATSAAESAtpaQKKLFLPFL        | 332                                                                       |     |
| Query_10022 | 254 | KSAMKLLGTHINLFKXHVTRHAIELVALTKLVCVENMETRDAANEMLVHIMQETISDGIITDSSIHDD-----IFRKIM    | 327                                                                       |     |
| Query_10001 | 344 | QKFRDIM                                                                            | DNSSGSKIEAIA-IRKGYFAAPCKLYLTPKDVLFMFNEMLHRSEQLFLSGAEQND- D RIG 411        |     |
| Query_10002 | 345 | KRFRDII                                                                            | DNPQSDTRALSSA-VRGYGYFAAPCKLFMTDDVVKFMFTMIQRSEQLYLYQGEVSD- D KLNQ 412      |     |
| Query_10003 | 349 | REFRTHI                                                                            | DTTEAGTRMSIA-VRGYGYFAAPCKFLSESDVKFMFSEMMQRSEQLYFGTADSM- D KVHH 416        |     |
| Query_10004 | 343 | EQFYGII                                                                            | RNVDNNKELSLIA-IRGYGLFAGPCKV-INAKDVDFMYVELIQRCKMFLTQTDG- D RVYQ 409        |     |
| Query_10005 | 347 | QQFYDII                                                                            | RTPESSMKELSLIA-IRGYGLFAAPCKA-VNSNDVDFMYIELIQRCKQMYLTEADTED- D NVYQ 413    |     |
| Query_10006 | 336 | KQFRQIM                                                                            | NSESSDKVSLA-IRGYGLLAGPCRRFLNVTDVVFMLESEMNLKCEQFLLKVGENQ- D KMYG 403       |     |
| Query_10007 | 342 | RQFRETL                                                                            | DNPHAKQNEIASA-VKGYGFAAPCKFHMTAEVVKYMFNEMQRSEQLFSSKNELV- D NVYN 409        |     |
| Query_10008 | 354 | NQFDEIF                                                                            | SNT-SGIREISMT-SKSYGRFLQIGKALYGEDEVCKVLRKLLQRFEYLSSTSSDAQQ- - NVYH 420     |     |
| Query_10009 | 376 | RKFSYIF                                                                            | ENNNSTPFDISIA-IRGCGRFAAPVKAFIGEWELKSLGLNSLFKFSKMLVMVLENIDE[1]- -VMH 443   |     |
| Query_10010 | 340 | LIFDDIA[13]                                                                        | BEQDQKTKDISIA-VRGYGYFAACVSKRLDKBEERYKPIFQNLNPSNWAISNLNEIET -[1]ALSQ 421   |     |
| Query_10011 | 344 | KDALDVL                                                                            | NAQDADPKRISLA-IRALGKLAACIVKFSGKESLKDFAHRL-----EPPGSLSRGDDG[1]E[1]SLGY 409 |     |
| Query_10012 | 335 | NFFKNKM                                                                            | LSSSTSSYDMKLV-IKAFGLFAAPCRVYMTQDVLVYMTVVMQRAEQIYFKEGDISNA - DLQN 402      |     |
| Query_10013 | 355 | KRFAKAM                                                                            | GEA-ASHRAVAIA-IRGYGYFAAPCKFLCGVDDLRLMSDDLARRCQQLYFHMGGDDEQ E SAIH 422     |     |
| Query_10014 | 339 | QKFYKNL                                                                            | TDGNKDLKEMVIS-IRKGYGAFAGPCRELDMDTKMLMLNIIIDICDRNFLSADSQAQH[4]E KIFQ 411   |     |
| Query_10015 | 342 | QBY-NKM                                                                            | LETSESTKLSLA-VKGYGLFSGCRQFLSPVEVHTMFSQVLTASQHAFYQSGDMLN - KLTN 408        |     |
| Query_10016 | 343 | EKF-QLM                                                                            | IKCSENIIRVSTA-IRGFYFAKVCCKLYLTEKDVKYMLNDVIKKEQHCLNEE----[4]E RIQI 409     |     |
| Query_10017 | 339 | KCFRSLM                                                                            | NDPDIHRLSLIA-VKGYGHFAKPCRLYGSMDLHFMFGEMVQRSEQLFLASVDFTT[6]E ERFL 413      |     |
| Query_10018 | 340 | KKFRSII                                                                            | DSGSSDAKELAIA-IRGYGYFAAPCKFLKDKDVRFMFTDLLQRSEQLFPI--DVNV- D KIYQ 405      |     |
| Query_10019 | 347 | KTFRRII                                                                            | DSVLSDRQMAIA-VRGYGYFSPCKFLMQADVRFMFSEIMQRSEQFLYSQSDLSE- D RAQH 414        |     |
| Query_10020 | 350 | KEVLPVI                                                                            | SDFGASTLAITFA-LQCLGWFASSIFLYLGAQYIKIEDKLRVYGESLLALDAKTTAW[6]Q YVQC 424    |     |
| Query_10021 | 333 | QQFRQIL                                                                            | DSDGSSWKTVSVA-VRGFYFAEAAKLLAPPDMRQVYADVQRAEDLFTAESDSSDE - RLSN 400        |     |
| Query_10022 | 328 | KEFETIL                                                                            | NNEFNQTNVLLISIKAVGIFSKAIKTKSGDDALREYLSKLTTLSONKIIFEFQEQED[6]N[6]KQKQ 409  |     |

Supplementary Figure 5: COBALT analysis DNA-PKcs from representative examples from all major phyla (short list)

|             |     |                                                                                     |                                                    |                      |      |     |
|-------------|-----|-------------------------------------------------------------------------------------|----------------------------------------------------|----------------------|------|-----|
| Query_10001 | 412 | LHSFLGALASIVEELD-QFSETFPLSFLERLVLVQMQLVPRLLHVKLHNQCYIALIRLFLGLALKGSIF-KGFLERIIYQSL  | 489                                                |                      |      |     |
| Query_10002 | 413 | LPNLFLEALASIMRQLD-VLSDSFQAALERLIVVQVSSYPVPNKYQYLSHQAILLVLLIALSSKGATL-KNFLSRVVYQAL   | 490                                                |                      |      |     |
| Query_10003 | 417 | LPSFLEALASIVQHLD-QLSDMFVTSLERLIVVLFENPFRLLGKMKHLICQKAILLVKLLALVPKQATL-RTFLLSRIVYQAL | 494                                                |                      |      |     |
| Query_10004 | 410 | MPSFLQASVSVLLYLD-TVPEVYTPVLEHLVVMQIDSPFQYSPKMLQVCCRAIVKVFLLAAKGPVL-RNCLISTVVHQGL    | 487                                                |                      |      |     |
| Query_10005 | 414 | LPSFLDSIASVIFHLD-KIPGVYTPVLERLVLVQIDSPFLYSARMQPICCRSIVKVFVLAGKGPVL-WNFISTVVHQGL     | 491                                                |                      |      |     |
| Query_10006 | 404 | LHSYLDIAIANIIEID-ELSEYASIVEHLLVMQIQNMPMLNEKMHFMATKSVIHVLLALMCKGSVF-NQVLSGVVYQV      | 481                                                |                      |      |     |
| Query_10007 | 410 | LPSFIESLARIVEQME-EVSDTFVLSLEKLVVCLFHEHFPSPYKRRKLDVQSLIGTFHALISKGPTEL-RIFLGRVVYQGL   | 487                                                |                      |      |     |
| Query_10008 | 421 | ITNLEAASRGLLCLLS-KIADDDVQLVERHVTFLFHNPLMEKRFYHRCKVINVATFAAYGHNYQY----IQSVFQSL       | 495                                                |                      |      |     |
| Query_10009 | 444 | LSSFINAFSNILFEFK-DIEYWMHELEQAVATYIIFPYLFTVQRERYYSAVNRLSSLYHRPEFL-KTFLGRIVRQGL       | 521                                                |                      |      |     |
| Query_10010 | 422 | IPLYIEAYCFIGREYD-EIFQQLMETEHEVGLMIMYFPRMVDLRLRCVNAFEHLLWMLYLKGRGTMEKFFVSKSFYQTL     | 500                                                |                      |      |     |
| Query_10011 | 410 | AVTLVGAFADMVHLD-DVEDLMVTFIAQVTGSIFFLYPQLFAKQKQAVYALRNLLKALYPKGPVY-FLFLRNIVWSSL      | 487                                                |                      |      |     |
| Query_10012 | 403 | LPDYIESLSSIMRQLS-AVTNEQLVALQCLTVQLIENFPKLPKPFHWAIRAITVTLSSLAESGGTFLEEFLLSNVVYQGI    | 481                                                |                      |      |     |
| Query_10013 | 423 | LASYIDAARLIQQLE-ESGDVFLPILERLIVLLLEAYSPMYRQRASVHSLTRCFVSLYHKGSTL-QTFPAKVANHFV       | 500                                                |                      |      |     |
| Query_10014 | 412 | LSSFIESLSCVCSQID-SFSEGLNTMEKLVILADDCYPKLVKRYNNQISLAIAALFLAIQRTNFSDE-FISRIIYHSL      | 488                                                |                      |      |     |
| Query_10015 | 409 | LPSYIESLAIISNMDD-VVNSGILENVQQLSSALVEHPFLVSSFKRFLAYRALFRLLFTVYNKPGYF-HEFLHTFVYKAI    | 486                                                |                      |      |     |
| Query_10016 | 410 | LPSFLDLSLSSIVLQIQ-EISESSLNLEKLVFLQIQNFPYLPSPYHFLCYNLSLIKFLAVHSGKQPQF-KGFLNKIIYQGI   | 487                                                |                      |      |     |
| Query_10017 | 414 | LPTFIEALANISKEIQ-NLPDVLSSLQKLAVLLFHCYFPLSSHVRVQGSVLLKLMVAVSSIPTSF-KQFLSHIVYQGV      | 491                                                |                      |      |     |
| Query_10018 | 406 | LPSFLEAFASILNILD-EVNDTFTFRSLEKLTIVLLENFPYVINELHSLCYKSLFELLALHSGKAAL-KNFLSRVVYQGL    | 483                                                |                      |      |     |
| Query_10019 | 415 | LPTFLEALSIIIEELD-KISDSVLACMERIVRFLDKFALNLKGGKFLCCKALIRVLFHLSKSGAIL-RNFLSEIVYQGL     | 492                                                |                      |      |     |
| Query_10020 | 425 | IGQFVQHRSDVV--LD---EGYIMFLERILCHLMTAYPQCLLKSQSVVHKSIALFVLSKWTVID--PVDQFVHHQL        | 496                                                |                      |      |     |
| Query_10021 | 401 | LPSFVESLNLALHLD-ELTGVFLSLLARLSVTVCHMYRVSERMGRVGLRAVAHALHRLSRRRPGLAKAFAAQVVYQSL      | 479                                                |                      |      |     |
| Query_10022 | 410 | LLSFIESYSFIQNLDSBPSDEVQHFLLKVCIEGRHRRKLYQKYRDRFYEALASFTKALKSHQKAF-ANWIQKFDVLSL      | 488                                                |                      |      |     |
| Query_10001 | 490 | IRSCSH---PIVLESQEAENSEN---[3]VNLKVD-----VSYQDYLPMWKA-LLT                            | AGKLLKAL-GQYNTAEQHR                                | 550                  |      |     |
| Query_10002 | 491 | VQTCSH---PVVLDGSPSIDH--pV[5]QDTEADLLADARHITYKDYVKLWAS-LLD                           | STHVKEV-QAMGMVADR                                  | 561                  |      |     |
| Query_10003 | 495 | IRTCSH---PNVIEGVTAEDEDLp[5]GGEQQPQPPVKRFSYRDYLELWGN-LLD                             | SSRLKEL-SQWGAVADRQ                                 | 567                  |      |     |
| Query_10004 | 488 | IRICSK---PVVLPKGPESSESE--D[1]RASEGVRTGKWKVPTYKDYVDLFRH-LLS                          | SDQMMDS-ILADEAFFSVN                                | 554                  |      |     |
| Query_10005 | 492 | IRVCSK---PVLPGEGTGRSE--S[5]SASEVMWTGKWRVPSYKDYLDLFRS-LLN                            | CGKMKEF-GLVD-TLQMIN                                | 561                  |      |     |
| Query_10006 | 482 | IRTCSH---PIVLETEQTD--T[5]VEKQ-----S-ISYKSYLNINWL-LMD                                | SPEIKVV-LFESFALFILT                                | 543                  |      |     |
| Query_10007 | 488 | IRTCSH---PVATDLGEVBAE---V[5]MESE-----KKITYKDHLDFWNM-LLG                             | SSHLKV---HSKLPDPEKS                                | 548                  |      |     |
| Query_10008 | 496 | IRVIAS---LPSVKGESIVLAK--                                                            | DENTFHLDVLPFKM-LLD                                 | S-EFVLD-SEFGDRAMQV   | 550  |     |
| Query_10009 | 522 | LITFSKp-heALLPHLNTGDTpw--                                                           | -----YEVYKEVWYH-LLH[19]-QQVKQeGeKEKEKEKDS          | 593                  |      |     |
| Query_10010 | 501 | ILTCSD-----ATQLQNRSDLQn--                                                           | ---ANSKDMIDVVAEHTYQEMFFFWEN-IFK[16]ENRLNTI-----QLE | 571                  |      |     |
| Query_10011 | 488 | QRAMEP-----VDEALEEGSVq--                                                            | -----LWRHYVELWSH-LID[15]AESFEEL-----VTSVGVNGV      | 549                  |      |     |
| Query_10012 | 482 | IRSCKH---QIAIDVELQKGO---                                                            | -----FHENVFTYKDYIPLWKE-LL-                         | --SVNNE-QKRSTSLTQTQ  | 534  |     |
| Query_10013 | 501 | LSACSQ---SIRTEMDAEDAva--                                                            | -----QSYLALLRQ-LLK                                 | GSLVKI-PDEEMTHEDRN   | 550  |     |
| Query_10014 | 489 | IRIFSY---KTLYSVN-QEDTS---                                                           | ---DETNEPMSSIIVTTSLDYVMLWSN-FLG                    | LQEFSDL-K--SDNLDDK   | 549  |     |
| Query_10015 | 487 | VLSCSH---APEVESSPGEQgs[5]                                                           | GGGEWKLKNEVVTFSSYIPLWTA-LMV                        | PEKVAANI-KVSGMPATVMT | 557  |     |
| Query_10016 | 488 | IRTCY---PVRFEIAREENM---                                                             | ---SGDNLELKNPREITSKSYSSLWEN-LLY                    | IVRNKEL-NHIGISLEDRH  | 551  |     |
| Query_10017 | 492 | IRSCSL---PVLIEAVQGDSDAv--                                                           | VTAAPLADSNKVMYSLDYVQLWIQ-LID                       | YKLLKGM-GM-DFDLELR   | 556  |     |
| Query_10018 | 484 | IRTCSH---PVYV---ETDSDLN--I                                                          | QSDSVILE-TGPRISYKDYISLWKN-LIQ                      | ATEIKGL-TLITTDREHI   | 546  |     |
| Query_10019 | 493 | IRTCSH---PVIL-KEVNGEST--I                                                           | MEEREVEYEGSTPNTSLKDYLELWEY-LLD                     | KDKLKE-SLLGKQLEERK   | 557  |     |
| Query_10020 | 497 | LFSIADi-----TDPDqaV[5]                                                              | TGELVTNLIYIEYEGFVNLNLRSErVVG[9]SGDVRQI             | -----ELK             | 563  |     |
| Query_10021 | 480 | VRTCSH-ehPVYQSDTEAGSSPgsA[5]                                                        | DFVQGDASNVSVRKISYKDYLRLLWLC-LFS                    | LEKEKLLcDYVGMASAAER  | 555  |     |
| Query_10022 | 489 | IQTCKIip-dAVLFGGESPYESL---                                                          | -----QDAVQFWRE-WLN                                 | ----KDK-----         | 524  |     |
| Query_10001 | 551 | ---V LASAIYDELLSAMLKMSRLDLS---                                                      | ---NSTDS--ESQP-STSEP                               | ALS---D--PSSDPLR     | G    | 601 |
| Query_10002 | 562 | ---K IHII LYDELIFSILKILSKLDLTS---                                                   | NKDTTE--LQDQ-VAVDS                                 | DS--TEDA--S-SDPLH    | G    | 614 |
| Query_10003 | 568 | ---A MHRMLYDELVTSVLKVIDKLDLTT---                                                    | SKQVET--GNEE-LTADV                                 | SG--SQDG--TTSDFPA    | G    | 621 |
| Query_10004 | 555 | ---S[4]LNHLLYDEFVKSVLKIVEKLDLLEIQ                                                   | TVGEQ-----E-NGDEA                                  | PGVMM---iPTSDFPA     | N    | 611 |
| Query_10005 | 562 | ---L[4]LNRLLYDEFIKSILKIEKLDLSVEKQ                                                   | NQREE-----E-GSGDV                                  | SNGNV---iPTSDFPA     | D    | 618 |
| Query_10006 | 544 | ---Q LTDALYNELMNSVIKVLNKLDTSTTS                                                     | TELTEQ---MDEA-STSGG                                | DVTMETDD--VSADPTS    | S    | 602 |
| Query_10007 | 549 | ---A LTQAIYDELVRSTLKILSKLDLTSVRG                                                    | SEDTDQ---GDSA-GTADK                                | GRPVTFPL--ASSDPVS    | G    | 607 |
| Query_10008 | 551 | ---N IQRTLDFCFMKSFLIVRLLSFTKAF                                                      | QDVEEY-----                                        | -----FRFGNPVF        | N    | 594 |
| Query_10009 | 594 | isis[4]IIQLLYNEIVQMTIIFIRKLDLSYSTK[5]                                               | RQEKELKKQVVKDKDK[7]EEEEQEEDvTMedQOQ[6]G[3]         |                      | G    | 685 |
| Query_10010 | 572 | ---F[2]---ILYDEFISSVFKMIRTLNLAVTEA                                                  | ---SDVSLGTSI-TKNND                                 | ---HEVDAn-LIAIAGS    | G[4] | 630 |
| Query_10011 | 550 | ---I[4]LRESIYDAIMHCVKIVMNENLNKYRVK[5]                                               | KYSEELDagPIE-PEAEM                                 | -----DLi---EPLD      | M[2] | 613 |
| Query_10012 | 535 | ---L IVVKYVDELVNTVLMKMLDLSRTRK                                                      | TNI BALS-----TS                                    | GGASEADI--PVLDPES    | G    | 587 |
| Query_10013 | 551 | ---A MLRTRYDETLKAFHLINKLNLTHSS                                                      | SDAEDedvAVAT-SGVKE                                 | EEPHEVDD--VSDPTT     | S    | 610 |
| Query_10014 | 550 | ---K IVEIIFNEYIESI IKIMNKLDLAAVKN                                                   | -DGSEVN-GGEQ-ENVDK                                 | NQSDLVGS---SDPII     | G    | 606 |
| Query_10015 | 558 | ---E MSNFIYSEFISCIIEISEKLDLTYKQ                                                     | NELQQQE-----EV                                     | SGSDEGDP--ATSDFVS    | G    | 616 |
| Query_10016 | 552 | ---N LLQLIYDEIISVVLTLKKLDLATTHS                                                     | MQDSEIK-DSNL-KQFET                                 | SELYSTVS----DPFY     | G    | 608 |
| Query_10017 | 557 | ---S IHQLVYSEFIQSLNILRKLDFLTAST                                                     | TEDGIM-----A-NEGEG                                 | GGSGGGDPvITSDFVL     | G    | 614 |
| Query_10018 | 547 | ---Y VQRSLYNELHSLQRIILKLDLTSQQ                                                      | TTIEE-----ET-QSSE-                                 | -----GTSNPPVA        | G    | 593 |
| Query_10019 | 558 | ---V MHGLVYDEMIRGILRIIHKLDLSSSKG                                                    | SSAQEGDILGKS-SASDV                                 | PASATADKevSLSDPVP    | G    | 620 |
| Query_10020 | 564 | ---K[4]LQAIILDSVTKHVLAIIRKLNLSYQFD                                                  | SQTCKIG-----RDA                                    | -----T               | G[1] | 608 |
| Query_10021 | 556 | ---S ISGGIFDAFLSSVLAIERLDLSACRL                                                     | SDLEPPvtAASE-ASSSS                                 | -ATTDEDSaaPTDTLQ     | G    | 617 |
| Query_10022 | 525 | ---I[4]TCQYVYGELIQRVIRIISDLNLTYYKVE[3]                                              | NNNKDGN-QDES-NNNN[7]NQELTGLHq---                   | DYIV                 | Q[2] | 598 |

Supplementary Figure 5: COBALT analysis DNA-PKcs from representative examples from all major phyla (short list)

|             |     |                                                                                        |     |
|-------------|-----|----------------------------------------------------------------------------------------|-----|
| Query_10001 | 602 | LHAVCPEDFILLTNLVELSRDLDPVQTQKFSWVFPFHGQLIQSSKLPVSGLYKMLTVCMQVASQISYFKEMNRQLK           | 681 |
| Query_10002 | 615 | LHATKPKDFQIVFNLVDFCRDLLPANQPALFKQWYRFGHEVILLSCRLLPVSGFYKLLTVCMMNICTQIQFPCIKPSDL        | 694 |
| Query_10003 | 622 | LQAACKPRDFVVFINVVDFCRDLLPHHHPEYFQRWVFTVGHALILHSTRLLPVSGFYKLLSVCMTICTKVYFKDLDTKLL       | 701 |
| Query_10004 | 612 | LHPAKPKDFSAFINLVDFCREILPEKQAEFFPEWVYSFSEYELIQSTRPLPLISGFYKLLSITVRNAKKIKYFEGVSPKSL      | 691 |
| Query_10005 | 619 | LQPVPKDFTFVFNLVDFSTELLERHEEFDQWYRFGYELILRSTQFPLVSGFYKLLSATMKIAKKINYPKGVSTNTW           | 698 |
| Query_10006 | 603 | VHASKPKDFQVFINLVDFCRELLPNKHINLFWNIFTFSHNIIILLSTQNPLVSGFYKLLALCMKISNKLAYFQ-VN----       | 677 |
| Query_10007 | 608 | LQASKPKDFQVFINLVDFSRDLHTDQYCALFRKRWFTFGHQLIVMSTKYPLVSGFYKLLAICMHATRKTAYFKDIS----       | 683 |
| Query_10008 | 595 | VIPTKQADYDLFYNLVELCRSVIMNGSHVLPFEPWQPMITMLLELSSRYPMVSGFYKLLAVVWMAEKLNYPNYTEQDKT        | 674 |
| Query_10009 | 686 | LKPTPKDFLELFINLVDFSKFLARQHTNLTFRWYIFGKEIIFGSRKYPLISGFYKLLHVLKVAKKVNYFGLDGSNK           | 765 |
| Query_10010 | 631 | LQPLVSKDFVLFQNLVDFWQLFLPRIKSELFSRWVYLAGDTLITFSTRYPVSGFYKMLGSCLTVCESIKFDFGIKNVDN        | 710 |
| Query_10011 | 614 | -----MRKYLNLVDFVQELLSGPCSSILKWTYFPGRCIIELSNRYPLISGFYKLLTVNITIANREGFLSVAGEDSL           | 685 |
| Query_10012 | 588 | LEANNRKFQVFINLVDLTRDVLMSVDCSQFEKWIQPFYKVISESSNKPLVSGFYKLLTVALQCDRLHYFSDYGDMLN          | 667 |
| Query_10013 | 611 | LIASRPKDIQVLIHLVTFQDLPSTTRTDLFPRWLHIYSDIVTRSSKYPLVSSLYKLELANTIAETEQRVFEAASKTAE         | 690 |
| Query_10014 | 607 | LKPQKPRDFEIFINLVDFTRLELMNKNDFLKSKEIILLSTSHCLISGFYKLLATIMKMAVKIYGFNKIDSIQT              | 686 |
| Query_10015 | 611 | LKAKVPKDFQVYMNVSLEKVLPLQSEDELEPHIPLRVLVFVTVQSSLOPLVSAHYNATTVLTCSRQTFQSR-----K          | 685 |
| Query_10016 | 609 | LQLSKPKDFRVFMNIVDFCKDLFISKHNELEFKWILIFGLEIIQFINKNPYISGFYKLLTVCLTICKKTRYFQHVKKLT        | 688 |
| Query_10017 | 615 | RQPAVPKDFQIFINLVELAKKVIPSVLSLDFPFWILTFSEVVSLATRYPLVSGFYKLLTVCLSICNKHDFDHDVLSGQ         | 694 |
| Query_10018 | 594 | LKPNVPKDFQVFINLVDFTKALLPTTRTFEFLPWIFPPGKNLVLSTRLLPVSGFYKLEICMTISSLSYFEDLNITV           | 673 |
| Query_10019 | 621 | LQPKVPKDFLIFISLIEFCRCVLPNVCYTLFERWYMFCDRIIMSSRFVPSGFYKLELVCKMKCEKLSFFKNIAEKPK          | 700 |
| Query_10020 | 609 | -SPTVPRDHSIMLNLTVEFVERLISQVLSLQCPWIPLMNQIFASICDLPLVSCFYRIGTVMTKAMHELNYFKSASSVDT        | 687 |
| Query_10021 | 618 | MVASTPKDIVIFVNLVDFVEELLQHRAGIAKWYPLCQALIEKSAENPLISGFYKLLATFVTRARDAGYFNDQPVPV           | 697 |
| Query_10022 | 599 | --ANNNTDQQLVRLSNFAEMFLQCKDQWFLKWIPQFTDTLTKKASQTPRISKLYQLLVKCMQICSNHRYFEVSDDDIS         | 676 |
| Query_10001 | 682 | IETSDES IKMEMDEEF[ 6 ]-EEACFMFLTKFAKEVMTRLRQYKDDLLASCLGFILALPREII ALDVTTFVPAIQ         | 756 |
| Query_10002 | 695 | SSQDES MDIDLNFSS[ 8 ]DRICICTFLFAKFSKEVLVRLKQYKDDLLASCLLVLSLPHIEIV QAEVAHLVPAIQ         | 772 |
| Query_10003 | 702 | SFSEES MDTEGRDRP[ 5 ]----CFTLFRFKVKEVLVRLKQYKDDLLASCLLVLSLPHQIV QSEISTLVPAIQ           | 772 |
| Query_10004 | 692 | KHSPED P----- EKYSFCALFVFKGKEVAVKMKQYKDELLASCLTFLLSLPHNII ELDRVAVVPAIQ                 | 753 |
| Query_10005 | 699 | KQCHTD P----- ERCACAFALFGKFGKEVTRIMKQYKDELLVSCLEFVLSLPHDII ELDIKAYIPAIQ                | 760 |
| Query_10006 | 678 | ----ES NEQE-----[ 1 ]QKAVCYLLIKKFSKEVLVRLKQYQDDLLAACLLTILSLPKEII TEQMIIDVVPAIQ         | 739 |
| Query_10007 | 684 | ----LS RDQDGENS[ 9 ]DRETAFLFKFSKFEVLVRLKQYKDDLLASCLGFILALPPELV IADLPTIVPAIQ            | 758 |
| Query_10008 | 675 | ENCSNH[ 2 ]----- LLLSDFIDHVLVESCRCFQGELELVSCLEFLLALPTCIV VEKLEISKEAIK                  | 731 |
| Query_10009 | 766 | SSSLDA[ 7 ]MEIDSGKSS[ 7 ]NKRNCFKLFAKFLKEVEAASTQYKDELLASVIQLLSVPKQLV --NIPVLIPTLS       | 847 |
| Query_10010 | 711 | ENIMIQ ---DSQDL[ 7 ]-QRASYFLFKFPEVVSARLPQYKDDLLASCLLVLSIPRELI --NIQNLISPIC             | 781 |
| Query_10011 | 686 | DADGGY[ 2 ]LDKRRDSTT[ 10 ]DRRLCKELFRKYQEVLVASRRYKLELLAACLLRCLSAPPLLV[ 1 ]----IASIIPSLR | 765 |
| Query_10012 | 668 | QPTEQK ----- --ASYSLLCRFLQELILRLQYKNDLQVACLETVIAAPVALV VPLLPHAVPAFE                    | 725 |
| Query_10013 | 691 | TAAGNM[ 1 ]----- EVAATLELMSKFGKEVMVRSKQYKDELLASCLTFVLSLPLPVV KRDFAVFPFAVE              | 752 |
| Query_10014 | 687 | NLNTSS[ 7 ]EDCDDPSS[ 9 ]ERVNCFHLFKYLLVSVIRMKQKDELLVSCLEFFLSPKPEFV IISMDHSFHCLN         | 772 |
| Query_10015 | 686 | QDPEVE ----- --TSIHLLMSYVRELLQRCRQYRDQLLASCLTILHLPLCIV QEIPFQVSPAIQ                    | 743 |
| Query_10016 | 689 | KEEIS- -----[ 4 ]DCLIAFELFAKFSREVVVIYQQFKDELLASCLTEVLSLPTCIV ESEINILIPAVQ              | 752 |
| Query_10017 | 695 | GTGDD VAMETEERT DRQSCYFLFSFKEVVMQYKDDLLASCLHLILVLPKEMV VSDFKELIPAIK                    | 764 |
| Query_10018 | 674 | TKCTIN AAAB-AESI DKYLCYLLYKFKYKEVLVRLKQYKDDLVHVSCLSLILALPYQLI QDDMALIIPAIK             | 742 |
| Query_10019 | 701 | DLKNEN LNLEIVDTS DCMKCFVLFHFKTKEIVVRMQYKDDLLFSCLLVVLSLPLELV TDLVSSVAALK                | 770 |
| Query_10020 | 688 | TEQTRF[ 3 ]----- -----FTSCVQVSSQARFYQDELRLTSSEFVLTAPLGLV A--IHAMVGIVK                  | 741 |
| Query_10021 | 698 | MEIADT[ 7 ]QDSQTDNDE[ 9 ]NRIQCCAMLSGFAASISARCGQLRGDLLAASLRFLLSLPASLL[ 5 ]----DDALAAVR  | 784 |
| Query_10022 | 677 | VAKKGE ----- -KQNTYNMLLTFPKELIGKQEYQDELLTSCLDLLLHVVPQIL[ 6 ]TDNVQNWQVIMQ               | 742 |
| Query_10001 | 757 | RSLEIGRSYLPLARTSLNLTLESWSKSLPP DVMKPFYEQLLPYLDAYLTSSAD-e----KNDTLSLVQKDPMKK-           | 824 |
| Query_10002 | 773 | MTFQLGLSYLPLAETGLEALERWMLHLLP DSIQPHLKVILPCLDGYLRGTIT-qGSDAA-DVVQVTMTASASS-[ 3 ]       | 846 |
| Query_10003 | 773 | TTFRLGLSYLPLAHAGLDALERWLLNLRP SALEPHPHILPYLDYSYLQTAAD-tGSSSSSDGFQTVSLTAASS-[ 1 ]       | 845 |
| Query_10004 | 754 | MAFKLGLSYTPLAEVGLNALEWISYIDR HVMQPYKIDILPCLDGYLKTSAL---SDETKNNWEVSAALSRAAQK            | 824 |
| Query_10005 | 761 | AAFKLGLSHTPLADAGLDALDAEDWSAHIPK HIQPHYKIDILPHLDGYLKTAAF---N-EAQNNWEGMNNINNSRKR         | 830 |
| Query_10006 | 740 | VALTGLSYPPLAGIADDALEYWCHNLPD HIVKPHYSCILPYLDNYIRTVDK---GMVAFSIFMWYISCGMHIR[ 8 ]        | 818 |
| Query_10007 | 759 | ITFKLGLSYPPLAVEGMEAIETFRWDSIPN HLLQPHYQDILPCLDGFKLQSE-qAGNETNSPSTLIMEPKGH--[ 2 ]       | 831 |
| Query_10008 | 732 | SSLKGLNLYPLIACVCMDALEKWSAEFPE[ 3 ]-QLDSFYTDLLPFDYDLRCTSV-----DETLVNNGFNPNYNGEK[ 8 ]    | 809 |
| Query_10009 | 848 | TAFKLGLSYLKLGHVGLNLTIEYWLVLPE[ 1 ]--VDAHLYAILPALSDFYLISTT-----NTSSSNQESANSK[ 4 ]       | 815 |
| Query_10010 | 828 | IALKMGLSYPLATIGINAIEKLVLDQCP[ 2 ]--ISKWLEQILPLFNEIYLLVKAD---SVDNSIKEFAQIRNTQRNRR[ 8 ]  | 861 |
| Query_10011 | 766 | NALKIGLRYPLAEVAMDSLERWQAAPPE[ 1 ]--LQHWLPQIIPCLNDYLVVVEK---ADVSEPGTSLVTEAVGTSAA[ 6 ]   | 841 |
| Query_10012 | 726 | VIFVRGRSMLPLARGLSALDKWYCTLPS HLVTPLLMQVLPYLDPPFRSQGV-aSGQDV---IIEKELMVLGRR             | 795 |
| Query_10013 | 753 | TALSGLGYPPLADAGLSALETW---LPP[ 2 ]-AAGRPFPAQLMPLLDKYLAAVA-aSDIDVEEMKLLSRSITRKR          | 823 |
| Query_10014 | 773 | QALDLGVNLYKLAEADALSLEYWLNKNIPT QLKPYFPSILTQFENYQASSN--KS---DLDSDEKVIILLNLSHK[ 2 ]      | 844 |
| Query_10015 | 744 | MALQGVSYLPLAEVCILALQWTKLSLQ EILSEHMPHVLPPLLPLRYSQET-gGEAEVHTRVITVTKMAFARQR             | 816 |
| Query_10016 | 753 | ISLQGLSYPPLAMSCDALETWLYSLPS ELLKEHYCKLLPSLNDYFLASDN--ISLQPLKNIHTFKQSLVVK               | 824 |
| Query_10017 | 765 | LALRIGMGYPLAKSVMBALEKWTLYIVE[ 4 ]DTLQCLVNEILPLLADYIKATSV-----QLKEEEDGGRG[ 3 ]          | 834 |
| Query_10018 | 743 | VSMNIGLSYPLANAADAALERWSSDLQP NIGYPYSDILPCFDYDKSSAD----DTTETLVEDSSKALKART               | 812 |
| Query_10019 | 771 | LTFKGLSYPPLAEAGLDALESWTALPA DKLKPLRILQCLDGYLTTGLDqLHNECNTIVLITSSH---HT                 | 841 |
| Query_10020 | 742 | SMLDLGRSFTPAAVVAIAALERWQKQRP[ 1 ]--LNDVICDIPLISAYLNQEKL-----GER[ 4 ]                   | 799 |
| Query_10021 | 785 | RGLRLGRFWPPLLEAALALERWTAAS-S[ 3 ]--LSDRVAPVLGGLLAVLLSDGG---SGAGLTDAAEAERGGADR[ 8 ]     | 864 |
| Query_10022 | 743 | KAILDLGRNNQLAWNINMLEQWPNLLPM NVTLDDLYHDILPKLSDFLQVDDN-----KK[ 8 ]                      | 804 |

Supplementary Figure 5: COBALT analysis DNA-PKcs from representative examples from all major phyla (short list)

|             |      |                                                                                                                                                                                                                                                                                                                                                                                                                                                  |                                                          |      |
|-------------|------|--------------------------------------------------------------------------------------------------------------------------------------------------------------------------------------------------------------------------------------------------------------------------------------------------------------------------------------------------------------------------------------------------------------------------------------------------|----------------------------------------------------------|------|
| Query_10001 | 825  | QGKKKIPVKLLKQ--TMFDA--EKGESESELK <b>IQRKCVLL</b> LGS <sup>1</sup> GG <sup>2</sup> INHALVFGQTANP---PD-L                                                                                                                                                                                                                                                                                                                                           | VAVDSDQ--                                                | 890  |
| Query_10002 | 847  | AGKRKLPAKLIKGG--ASTTG--QT-QDSPLR <b>VQRIHL</b> LGS <sup>1</sup> GG <sup>2</sup> QTNAYLE--TSAEETA-KV-A                                                                                                                                                                                                                                                                                                                                            | VAWDTQP--                                                | 912  |
| Query_10003 | 846  | RGKRKIPVKLLKA--AAERN--QV-QESDLV <b>KARIRI</b> VR <b>FLGS</b> LGG <sup>2</sup> H <sup>3</sup> TNA <sup>4</sup> CLV <sup>5</sup> GLTAEDLA-KR-A                                                                                                                                                                                                                                                                                                     | VAWDTQT--                                                | 912  |
| Query_10004 | 825  | GFNKVVLKHLKKT--KNLSS--NEA--ISLE <b>EIRIRRV</b> Q <b>MQLGS</b> LGG <sup>2</sup> QINKNLLTVSSDEMM-KS-Y                                                                                                                                                                                                                                                                                                                                              | VAVDREK--                                                | 890  |
| Query_10005 | 831  | GGSKVLFPHHTKKS--KEPLV--SED--S <b>AITAVRRRI</b> VR <b>L</b> LGS <sup>1</sup> GG <sup>2</sup> QNNRSLVTVASAEEMM-KR-C                                                                                                                                                                                                                                                                                                                                | I <sup>1</sup> AWVTEK--                                  | 896  |
| Query_10006 | 819  | SSFSTINCLLY-----F-----Q <b>S</b> -YESKLG <b>V</b> <b>IKDRV</b> V <b>Q</b> Y <b>L</b> GS <sup>1</sup> LGS <sup>2</sup> IN <b>Y</b> TL <b>L</b> T--NSQDDIS-KQ-A                                                                                                                                                                                                                                                                                    | I <sup>1</sup> AWDTEQ--                                  | 878  |
| Query_10007 | 832  | SRKGLPIKLLKP--AVA----KE-ESSQLE <b>LKQRI</b> V <b>K</b> FLGN <b>L</b> GGATNA <b>M</b> VQ--CTSEDIA-KI-A                                                                                                                                                                                                                                                                                                                                            | V <sup>1</sup> AWDQEK--                                  | 895  |
| Query_10008 | 810  | QTVNSDSENVLVK--ADDND--SEEEMPN <b>V</b> <b>SLRR</b> IAS <b>FVGS</b> LGCYMN <b>R</b> FLID----SADVG--S-L                                                                                                                                                                                                                                                                                                                                            | LRWQGS--                                                 | 873  |
| Query_10009 | 916  | MGRGAAPRMMTKSi--DFVdpkLLAQR <b>TV</b> VE <b>ES</b> L <b>EIRIRRV</b> Q <b>M</b> LGS <sup>1</sup> GG <sup>2</sup> QIN <b>Y</b> HL <b>M</b> GS <sup>3</sup> VNL <b>M</b> AP <b>G</b> Te <b>S</b> G--                                                                                                                                                                                                                                                | V <sup>1</sup> AWDTIS--                                  | 985  |
| Query_10010 | 862  | TRKERVKSGQK <b>K</b> syK <b>T</b> VVGi <b>g</b> Q <b>L</b> E <b>K</b> N <b>V</b> L <b>G</b> LD <b>Q</b> <b>V</b> R <b>V</b> L <b>R</b> L <b>L</b> GR <b>L</b> GG <b>V</b> SK <b>F</b> L <b>F</b> ED <b>I</b> V <b>N</b> ND <b>L</b> V <b>Y</b> r <b>P</b> i <b>P</b> T[13]                                                                                                                                                                       | L <sup>1</sup> AWDPEK--                                  | 948  |
| Query_10011 | 842  | SRGQLAQIKRARA-----KDSQP <b>S</b> PFEL <b>I</b> <b>Q</b> <b>V</b> R <b>V</b> Q <b>R</b> FL <b>G</b> CIG <b>L</b> GH <b>F</b> L <b>V</b> PE <b>V</b> DL <b>L</b> Q <b>L</b> T <b>G</b> t <b>G</b> G--                                                                                                                                                                                                                                              | L <sup>1</sup> AWDPID--                                  | 904  |
| Query_10012 | 796  | --NRTNYSQNKV--ARKKI--IEHPESEL <b>S</b> <b>Q</b> L <b>H</b> E <b>I</b> S <b>F</b> L <b>G</b> Q <b>L</b> D <b>S</b> T <b>T</b> C <b>L</b> A <b>L</b> L <b>K</b> D <b>P</b> Q <b>Q</b> E <b>B</b> D <b>V</b> -----                                                                                                                                                                                                                                  | I <sup>1</sup> PWATCLqq                                  | 860  |
| Query_10013 | 824  | -----E--QA <b>AV</b> V--AVDS <b>DN</b> PF <b>A</b> L <b>K</b> M <b>R</b> I <b>L</b> R <b>L</b> L <b>G</b> A <b>M</b> G <b>Q</b> H <b>N</b> E <b>L</b> A <b>A</b> L <b>E</b> H <b>Q</b> G <b>A</b> G <b>G</b> g <b>S</b> D-V[8]                                                                                                                                                                                                                   | V <sup>1</sup> AWDMTN--                                  | 888  |
| Query_10014 | 845  | --GRK <b>L</b> PVK <b>L</b> FD--K <b>S</b> SLN--FDV <b>Y</b> E---- <b>Q</b> <b>I</b> <b>Q</b> L <b>K</b> I <b>L</b> K <b>I</b> L <b>G</b> Q <b>L</b> S <b>A</b> D <b>M</b> S <b>H</b> V <b>L</b> -ID----N-ED-I                                                                                                                                                                                                                                   | T <b>S</b> W <b>D</b> T <b>V</b> Q--                     | 901  |
| Query_10015 | 817  | --R <b>K</b> V <b>D</b> ---Q <b>K</b> M--K <b>E</b> SKR--VE--ET <b>M</b> A <b>M</b> Q <b>I</b> <b>Q</b> L <b>M</b> I <b>R</b> L <b>L</b> I <b>G</b> S <b>L</b> D <b>L</b> -L <b>R</b> L <b>H</b> T <b>I</b> P <b>Q</b> D <b>P</b> D <b>T</b> I <b>a</b> S <b>A</b> -A                                                                                                                                                                            | V <b>R</b> W <b>N</b> --V <b>g</b> k                     | 876  |
| Query_10016 | 825  | ---K <b>L</b> L <b>P</b> L <b>K</b> I <b>S</b> Q <b>Y</b> --K <b>K</b> I <b>K</b> Q--T <b>D</b> L <b>H</b> E <b>S</b> E <b>L</b> <b>I</b> <b>Q</b> <b>V</b> R <b>I</b> L <b>R</b> FL <b>G</b> S <b>V</b> G <b>N</b> Q <b>Y</b> N <b>F</b> A <b>M</b> I <b>S</b> -AD <b>K</b> I <b>K</b> I <b>H</b> -E <b>V</b> -A                                                                                                                                | V <sup>1</sup> AWDINKqn                                  | 890  |
| Query_10017 | 835  | AT <b>K</b> R <b>Y</b> AR <b>M</b> K <b>M</b> VE <b>K</b> --W <b>S</b> E <b>G</b> L--H <b>Q</b> S <b>R</b> D <b>I</b> T <b>S</b> <b>V</b> R <b>R</b> I <b>L</b> L <b>L</b> L <b>S</b> L <b>G</b> G <b>V</b> V <b>N</b> E <b>S</b> L <b>K</b> V <b>S</b> P <b>S</b> Q <b>H</b> S <b>L</b> -----                                                                                                                                                   | V <b>S</b> W <b>S</b> D <b>R</b> --                      | 898  |
| Query_10018 | 813  | G <b>K</b> A <b>K</b> L <b>P</b> V <b>K</b> V <b>V</b> N <b>P</b> --T <b>G</b> G <b>S</b> K--D <b>D</b> ----S <b>P</b> L <b>A</b> Q <b>V</b> R <b>I</b> <b>R</b> I <b>Q</b> L <b>L</b> GR <b>L</b> GG <b>N</b> T <b>N</b> -S <b>L</b> V <b>I</b> R <b>K</b> G <b>N</b> D <b>D</b> G <b>S</b> -S <b>Q</b> -A                                                                                                                                      | V <sup>1</sup> AWDNHK--                                  | 875  |
| Query_10019 | 842  | S <b>R</b> G <b>R</b> K <b>L</b> P <b>L</b> K <b>L</b> L <b>K</b> M--K <b>P</b> Q <b>S</b> Q--H <b>Q</b> M <b>T</b> L <b>T</b> P <b>L</b> A <b>K</b> <b>V</b> R <b>I</b> L <b>R</b> M <b>F</b> G <b>L</b> GG <b>E</b> T <b>N</b> -I <b>L</b> L <b>L</b> -D <b>N</b> T <b>G</b> I <b>N</b> S--S <b>N</b> -A                                                                                                                                       | V <b>V</b> W <b>D</b> T <b>E</b> N--                     | 907  |
| Query_10020 | 800  | ---D <b>K</b> A <b>T</b> L <b>Q</b> G <b>V</b> K <b>A</b> --T <b>G</b> S <b>D</b> E <b>a</b> -----S <b>D</b> L <b>A</b> Q <b>V</b> R <b>R</b> L <b>L</b> L <b>L</b> GR <b>C</b> D <b>G</b> --N <b>L</b> L <b>L</b> V <b>S</b> E <b>P</b> S <b>L</b> I <b>T</b> ---A[2]                                                                                                                                                                           | I <b>V</b> GG <b>I</b> F <b>S</b> -p                     | 859  |
| Query_10021 | 865  | R <b>A</b> L <b>R</b> S <b>I</b> E <b>A</b> R <b>R</b> A <b>R</b> A--K <b>N</b> Y <b>A</b> A <b>g</b> g--G <b>A</b> E <b>L</b> G <b>L</b> A <b>E</b> M <b>R</b> K <b>V</b> L <b>L</b> FL <b>G</b> S <b>A</b> Q <b>S</b> S <b>F</b> K <b>Y</b> <b>Q</b> L <b>A</b> E <b>I</b> A <b>S</b> D <b>K</b> A <b>A</b> T <b>a</b> D <b>L</b> -A                                                                                                           | --A <b>W</b> S <b>P</b> G <b>G</b> -r                    | 933  |
| Query_10022 | 805  | GG <b>D</b> T <b>Y</b> Q <b>L</b> E <b>M</b> L <b>K</b> S--G <b>N</b> E <b>V</b> N <b>1</b> -----E <b>R</b> K <b>D</b> I <b>A</b> L <b>K</b> V <b>M</b> D <b>L</b> L <b>G</b> K <b>I</b> G <b>G</b> NA <b>H</b> -S <b>I</b> S <b>N</b> E <b>Q</b> N <b>K</b> L <b>I</b> E <b>r</b> E <b>N</b> -F                                                                                                                                                 | I <b>K</b> W <b>D</b> P <b>E</b> K--                     | 867  |
| Query_10001 | 891  | <b>H</b> L <b>K</b> F <b>D</b> L <b>P</b> F <b>L</b> D <b>I</b> K--T <b>S</b> I <b>Y</b> F <b>D</b> A <b>F</b> L <b>P</b> K <b>V</b> V <b>T</b> L <b>A</b> T <b>V</b> S <b>S</b> D <b>R</b> Q <b>T</b> K <b>V</b> A <b>C</b> E <b>L</b> L <b>H</b> S <b>L</b> V <b>L</b> L <b>M</b> L <b>G</b> R <b>S</b> A <b>S</b> Q <b>P</b> T <b>G</b> ----                                                                                                  | N <b>P</b> M <b>A</b> A <b>I</b> Y <b>R</b> K <b>L</b> F | 962  |
| Query_10002 | 913  | <b>R</b> L <b>Q</b> F <b>A</b> V <b>P</b> F <b>V</b> D <b>M</b> K--P <b>N</b> I <b>D</b> L <b>D</b> R <b>Y</b> L <b>P</b> R <b>V</b> V <b>E</b> L <b>A</b> L <b>T</b> S <b>G</b> D <b>R</b> Q <b>T</b> K <b>V</b> A <b>C</b> E <b>S</b> L <b>H</b> T <b>L</b> V <b>L</b> F <b>M</b> L <b>G</b> K <b>T</b> Q <b>Q</b> P <b>E</b> Q <b>R</b> Q <b>A</b> K                                                                                          | S <b>P</b> M <b>Q</b> H <b>L</b> Y <b>R</b> R <b>V</b> F | 988  |
| Query_10003 | 913  | <b>H</b> L <b>Q</b> F <b>A</b> V <b>P</b> F <b>M</b> D <b>M</b> K--P <b>T</b> V <b>C</b> L <b>D</b> P <b>L</b> P <b>R</b> I <b>C</b> E <b>L</b> A <b>T</b> T <b>S</b> S <b>D</b> R <b>Q</b> T <b>K</b> V <b>A</b> C <b>E</b> L <b>L</b> H <b>S</b> L <b>V</b> L <b>M</b> V <b>G</b> Q <b>A</b> Q <b>Q</b> P <b>G</b> M <b>O</b> A <b>K</b>                                                                                                       | N <b>P</b> M <b>T</b> R <b>L</b> Y <b>K</b> K <b>V</b> F | 988  |
| Query_10004 | 911  | <b>R</b> L <b>S</b> F <b>A</b> V <b>P</b> F <b>R</b> E <b>M</b> K--P <b>V</b> I <b>F</b> L <b>D</b> V <b>F</b> L <b>P</b> R <b>V</b> T <b>E</b> L <b>A</b> L <b>T</b> A <b>S</b> D <b>R</b> Q <b>T</b> K <b>V</b> A <b>C</b> E <b>L</b> L <b>H</b> S <b>M</b> V <b>M</b> F <b>L</b> G <b>K</b> A <b>T</b> Q <b>M</b> P <b>E</b> G <b>G</b> Q <b>G</b> A                                                                                          | P <b>P</b> M <b>Y</b> Q <b>L</b> Y <b>K</b> R <b>T</b> F | 966  |
| Query_10005 | 897  | <b>P</b> L <b>S</b> F <b>A</b> V <b>P</b> F <b>M</b> D <b>M</b> K--P <b>I</b> I <b>Y</b> L <b>D</b> S <b>F</b> I <b>P</b> R <b>I</b> S <b>E</b> L <b>A</b> S <b>A</b> S <b>D</b> R <b>Q</b> T <b>K</b> V <b>A</b> C <b>E</b> L <b>L</b> H <b>S</b> V <b>V</b> A <b>Y</b> T <b>L</b> G <b>K</b> G <b>S</b> Q <b>I</b> S <b>E</b> Q <b>Q</b> E <b>T</b>                                                                                            | --L <b>Y</b> K <b>L</b> N <b>R</b> O <b>L</b> F          | 970  |
| Query_10006 | 879  | <b>H</b> L <b>R</b> F <b>E</b> T <b>P</b> F <b>I</b> D <b>M</b> K--P <b>I</b> I <b>Y</b> F <b>D</b> P <b>L</b> P <b>H</b> V <b>V</b> E <b>L</b> A <b>T</b> S <b>S</b> D <b>R</b> Q <b>T</b> K <b>V</b> A <b>C</b> E <b>L</b> L <b>H</b> S <b>L</b> I <b>L</b> C <b>L</b> G <b>R</b> G <b>A</b> Q <b>Q</b> P <b>E</b> V <b>Q</b> K <b>R</b>                                                                                                       | Y <b>P</b> M <b>Q</b> K <b>L</b> Y <b>K</b> K <b>L</b> F | 954  |
| Query_10007 | 896  | <b>H</b> L <b>K</b> F <b>D</b> M <b>P</b> F <b>M</b> D <b>V</b> K--A <b>A</b> L <b>Y</b> L <b>D</b> P <b>L</b> P <b>R</b> V <b>V</b> E <b>L</b> A <b>L</b> S <b>S</b> D <b>R</b> Q <b>T</b> K <b>V</b> A <b>C</b> E <b>L</b> F <b>H</b> S <b>M</b> V <b>L</b> M <b>L</b> G <b>R</b> S <b>V</b> Q <b>Q</b> P <b>E</b> G <b>Q</b> Q <b>R</b>                                                                                                       | H <b>P</b> L <b>D</b> G <b>L</b> Y <b>R</b> N <b>V</b> F | 971  |
| Query_10008 | 874  | <b>H</b> L <b>E</b> F <b>I</b> C <b>P</b> F <b>P</b> D <b>M</b> K--F <b>E</b> I <b>A</b> L <b>D</b> T <b>L</b> L <b>P</b> R <b>L</b> C <b>D</b> L <b>A</b> L <b>S</b> A <b>G</b> D <b>R</b> P <b>L</b> V <b>A</b> C <b>E</b> A <b>L</b> H <b>A</b> C <b>V</b> L <b>F</b> L <b>L</b> G <b>N</b> E <b>S</b> F <b>R</b> T <b>V</b> K <b>M</b> K <b>D</b> R                                                                                          | E <b>S</b> I <b>S</b> K <b>A</b> Y <b>S</b> H <b>L</b> F | 949  |
| Query_10009 | 986  | <b>R</b> I <b>Q</b> L <b>Q</b> I <b>P</b> L <b>G</b> D <b>L</b> g <b>V</b> S <b>I</b> Y <b>L</b> D <b>S</b> V <b>L</b> P <b>V</b> I <b>V</b> T <b>L</b> A <b>T</b> R <b>S</b> T <b>H</b> R <b>Q</b> T <b>K</b> V <b>V</b> A <b>C</b> E <b>L</b> L <b>H</b> S <b>I</b> V <b>L</b> M <b>V</b> G <b>T</b> N <b>S</b> -----G <b>G</b> S                                                                                                              | --F <b>H</b> R <b>L</b> Y <b>R</b> R <b>V</b> F          | 1054 |
| Query_10010 | 949  | <b>R</b> V <b>S</b> F <b>N</b> I <b>P</b> F <b>P</b> D <b>T</b> K--V <b>E</b> I <b>L</b> F <b>D</b> E <b>F</b> L <b>P</b> R <b>I</b> V <b>E</b> L <b>A</b> E <b>S</b> A <b>P</b> D <b>R</b> K <b>T</b> I <b>V</b> A <b>C</b> E <b>S</b> L <b>H</b> S <b>I</b> V <b>I</b> M <b>I</b> G <b>K</b> S <b>A</b> F <b>Q</b> L <b>S</b> R <b>Q</b> S <b>S</b>                                                                                            | --P <b>F</b> Y <b>R</b> I <b>Y</b> R <b>K</b> I <b>F</b> | 1023 |
| Query_10011 | 905  | <b>R</b> V <b>K</b> F <b>T</b> L <b>P</b> F <b>R</b> Q <b>D</b> K--P <b>I</b> I <b>W</b> L <b>D</b> S <b>L</b> S <b>R</b> M <b>V</b> E <b>L</b> L <b>S</b> S <b>D</b> R <b>R</b> M <b>K</b> V <b>T</b> A <b>S</b> E <b>L</b> L <b>Q</b> A <b>V</b> C <b>L</b> L <b>M</b> L <b>G</b> N <b>A</b> A <b>K</b> G <b>P</b> M <b>R</b> R <b>R</b> E[4]                                                                                                  | V <b>H</b> F <b>D</b> K <b>I</b> Y <b>K</b> R <b>L</b> F | 984  |
| Query_10012 | 861  | <b>P</b> L <b>V</b> F <b>L</b> P <b>F</b> K <b>D</b> M <b>K</b> --L <b>N</b> I <b>N</b> L <b>E</b> K <b>L</b> I <b>P</b> R <b>V</b> V <b>E</b> L <b>A</b> L <b>T</b> S <b>S</b> D <b>R</b> T <b>R</b> F <b>T</b> A <b>C</b> E <b>L</b> L <b>H</b> G <b>I</b> V <b>M</b> L <b>L</b> G <b>S</b> Q <b>E</b> A--Q <b>T</b> S <b>H</b> P                                                                                                              | D <b>K</b> Y <b>S</b> E <b>L</b> F <b>R</b> K <b>L</b> S | 934  |
| Query_10013 | 889  | <b>H</b> L <b>K</b> F <b>A</b> V <b>P</b> F <b>Q</b> E <b>M</b> K--P <b>E</b> V <b>Q</b> L <b>D</b> P <b>L</b> P <b>R</b> I <b>V</b> E <b>L</b> A <b>L</b> H <b>S</b> D <b>R</b> Q <b>T</b> T <b>A</b> A <b>C</b> E <b>L</b> L <b>H</b> A <b>M</b> V <b>L</b> M <b>L</b> G <b>Q</b> G <b>A</b> G <b>S</b> G <b>T</b> H <b>A</b> A <b>E</b>                                                                                                       | D <b>N</b> L <b>S</b> P <b>L</b> Y <b>R</b> H <b>V</b> L | 964  |
| Query_10014 | 902  | <b>H</b> L <b>K</b> F <b>Y</b> V <b>P</b> F <b>T</b> D <b>I</b> K--P <b>T</b> Y <b>F</b> D <b>R</b> F <b>L</b> P <b>R</b> V <b>I</b> H <b>L</b> A <b>Q</b> N <b>S</b> P <b>S</b> R <b>Q</b> T <b>K</b> I <b>N</b> A <b>C</b> E <b>L</b> L <b>H</b> A <b>L</b> V <b>I</b> Y <b>T</b> I <b>G</b> K <b>S</b> V <b>S</b> E <b>P</b> E <b>G</b> Y <b>S</b> Q <b>S</b>                                                                                 | Y <b>Q</b> M <b>T</b> K <b>I</b> Y <b>H</b> R <b>L</b> Y | 977  |
| Query_10015 | 877  | <b>L</b> V <b>K</b> F <b>A</b> T <b>P</b> F <b>E</b> H <b>I</b> K--I <b>D</b> I <b>Y</b> L <b>D</b> D <b>L</b> L <b>P</b> H <b>V</b> V <b>D</b> L <b>A</b> V <b>N</b> S <b>S</b> D <b>R</b> Q <b>T</b> K <b>V</b> A <b>S</b> E <b>L</b> L <b>H</b> S <b>I</b> I <b>L</b> M <b>I</b> G <b>T</b> G <b>A</b> Q <b>S</b> Q <b>E</b> T <b>Q</b> L <b>K</b>                                                                                            | E <b>P</b> M <b>A</b> P <b>L</b> Y <b>R</b> H <b>I</b> F | 952  |
| Query_10016 | 891  | <b>H</b> L <b>K</b> F <b>Y</b> L <b>P</b> F <b>I</b> D <b>V</b> K--L <b>E</b> I <b>F</b> L <b>D</b> K <b>F</b> L <b>P</b> R <b>I</b> V <b>T</b> L <b>S</b> T <b>A</b> S <b>Q</b> R <b>Q</b> T <b>K</b> V <b>A</b> C <b>E</b> L <b>L</b> H <b>A</b> V <b>V</b> T <b>F</b> M <b>V</b> G <b>C</b> G <b>A</b> Q <b>Q</b> P <b>E</b> L <b>Q</b> A <b>I</b>                                                                                            | Y <b>S</b> M <b>K</b> K <b>L</b> Y <b>K</b> N <b>V</b> L | 966  |
| Query_10017 | 899  | <b>R</b> L <b>G</b> F <b>A</b> V <b>P</b> F <b>S</b> D <b>L</b> K--P <b>E</b> I <b>Y</b> L <b>D</b> P <b>L</b> P <b>T</b> V <b>C</b> E <b>L</b> A <b>L</b> S <b>S</b> D <b>R</b> Q <b>T</b> K <b>V</b> A <b>C</b> E <b>F</b> L <b>H</b> A <b>A</b> M <b>L</b> F <b>V</b> I <b>G</b> K <b>T</b> Q <b>Q</b> --S <b>V</b> Q <b>K</b> K                                                                                                              | N <b>P</b> M <b>T</b> K <b>L</b> Y <b>Q</b> K <b>L</b> I | 972  |
| Query_10018 | 876  | <b>R</b> L <b>F</b> F <b>A</b> I <b>P</b> F <b>Q</b> D <b>M</b> K--P <b>I</b> I <b>H</b> L <b>D</b> P <b>L</b> P <b>R</b> V <b>V</b> E <b>L</b> A <b>L</b> S <b>S</b> D <b>R</b> Q <b>T</b> K <b>I</b> A <b>C</b> E <b>L</b> L <b>H</b> A <b>L</b> V <b>L</b> M <b>I</b> G <b>R</b> G <b>A</b> Q <b>Q</b> P <b>G</b> G <b>T</b> G <b>S</b> V                                                                                                     | T <b>N</b> Y <b>G</b> N <b>L</b> Y <b>K</b> K <b>I</b> F | 951  |
| Query_10019 | 908  | <b>H</b> L <b>T</b> F <b>A</b> V <b>P</b> F <b>Q</b> D <b>M</b> K--P <b>S</b> I <b>Y</b> L <b>D</b> P <b>L</b> P <b>R</b> V <b>V</b> E <b>L</b> A <b>A</b> K <b>S</b> S <b>D</b> R <b>Q</b> T <b>K</b> V <b>A</b> C <b>E</b> C <b>L</b> H <b>S</b> L <b>V</b> H <b>M</b> L <b>G</b> K <b>S</b> V <b>T</b> Q <b>P</b> Q <b>G</b> F <b>K</b> K--                                                                                                   | S <b>P</b> M <b>E</b> H <b>L</b> W <b>K</b> H <b>V</b> F | 982  |
| Query_10020 | 860  | <b>H</b> F <b>R</b> L <b>E</b> L <b>R</b> L <b>S</b> E <b>T</b> P--L <b>S</b> L <b>A</b> L <b>D</b> S <b>V</b> L <b>S</b> H <b>L</b> G <b>N</b> L <b>A</b> Q <b>S</b> S <b>V</b> R <b>R</b> V <b>K</b> S <b>V</b> A <b>C</b> E <b>S</b> Y <b>H</b> A <b>M</b> I <b>C</b> Y <b>L</b> C <b>G</b> K <b>T</b> A <b>T</b> H <b>P</b> H <b>T</b> A <b>G</b> T <b>K</b>                                                                                 | T <b>D</b> F <b>Y</b> D <b>L</b> W <b>R</b> E <b>V</b> F | 935  |
| Query_10021 | 934  | <b>L</b> L <b>Y</b> F <b>D</b> L <b>P</b> F <b>A</b> D <b>S</b> K--P <b>R</b> L <b>Y</b> L <b>D</b> P <b>L</b> S <b>R</b> C <b>V</b> A <b>L</b> A <b>T</b> S <b>S</b> S <b>Q</b> S <b>K</b> V <b>A</b> A <b>A</b> E <b>C</b> L <b>H</b> S <b>I</b> V <b>L</b> L <b>M</b> T <b>G</b> R <b>C</b> A <b>F</b> A <b>S</b> T <b>S</b> G <b>N</b> D <b>R</b>                                                                                            | E <b>Q</b> L <b>L</b> T <b>L</b> W <b>R</b> R <b>L</b> L | 1009 |
| Query_10022 | 868  | <b>R</b> L <b>K</b> F <b>T</b> V <b>P</b> L <b>Y</b> T <b>K</b> K--V <b>D</b> I <b>Y</b> F <b>D</b> A <b>C</b> L <b>P</b> K <b>V</b> V <b>D</b> L <b>A</b> K <b>N</b> S <b>S</b> D <b>R</b> E <b>T</b> T <b>V</b> A <b>C</b> E <b>F</b> L <b>H</b> A <b>L</b> I <b>Y</b> M <b>I</b> G <b>K</b> N <b>A</b> S <b>A</b> P <b>K</b> R <b>G</b> N <b>G</b> [5]                                                                                        | A <b>P</b> F <b>A</b> K <b>I</b> Y <b>K</b> K <b>L</b> F | 948  |
| Query_10001 | 963  | <b>P</b> Q <b>M</b> L <b>K</b> L <b>A</b> D <b>T</b> D <b>V</b> E <b>Q</b> <b>V</b> S <b>R</b> Q <b>L</b> F <b>E</b> P <b>L</b> M <b>L</b> Q <b>I</b> I <b>H</b> W <b>F</b> T <b>K</b> N <b>N</b> S <b>H</b> R <b>P</b> D <b>T</b> E <b>A</b> L <b>L</b> N <b>S</b> L <b>M</b> D <b>G</b> I <b>V</b> S <b>P</b> S--D <b>S</b> A <b>V</b> R <b>D</b> F <b>S</b> A <b>K</b> C <b>I</b> R <b>E</b> F <b>L</b> A <b>W</b> S <b>I</b> K <b>Q</b> --   | 1039                                                     |      |
| Query_10002 | 989  | <b>P</b> A <b>L</b> F <b>R</b> L <b>S</b> C <b>D</b> V <b>E</b> Q <b>V</b> A <b>R</b> Q <b>L</b> F <b>E</b> P <b>L</b> V <b>M</b> Q <b>L</b> I <b>H</b> W <b>F</b> T <b>G</b> N <b>K</b> F <b>E</b> S <b>E</b> T <b>T</b> A <b>L</b> L <b>N</b> A <b>M</b> L <b>D</b> G <b>V</b> I <b>H</b> P <b>T</b> --D <b>T</b> S <b>L</b> R <b>D</b> F <b>S</b> A <b>C</b> L <b>K</b> E <b>F</b> L <b>K</b> W <b>S</b> I <b>K</b> Q--                       | 1065                                                     |      |
| Query_10003 | 989  | <b>P</b> V <b>L</b> M <b>Q</b> L <b>A</b> C <b>D</b> V <b>E</b> Q <b>V</b> A <b>R</b> Q <b>L</b> F <b>D</b> P <b>L</b> M <b>M</b> Q <b>L</b> I <b>H</b> W <b>L</b> T <b>N</b> N <b>R</b> K <b>F</b> E <b>S</b> E <b>T</b> T <b>I</b> T <b>L</b> L <b>D</b> A <b>I</b> M <b>D</b> G <b>L</b> V <b>H</b> P <b>T</b> --D <b>T</b> A <b>L</b> R <b>D</b> F <b>S</b> S <b>R</b> C <b>V</b> R <b>E</b> F <b>L</b> Q <b>W</b> S <b>I</b> K <b>Q</b> --  | 1065                                                     |      |
| Query_10004 | 967  | <b>P</b> V <b>L</b> L <b>R</b> L <b>A</b> C <b>D</b> V <b>Q</b> T <b>R</b> Q <b>L</b> Y <b>E</b> P <b>L</b> V <b>M</b> Q <b>L</b> I <b>H</b> W <b>F</b> T <b>N</b> N <b>K</b> F <b>E</b> S <b>Q</b> D <b>T</b> V <b>A</b> L <b>L</b> E <b>A</b> L <b>D</b> G <b>I</b> V <b>D</b> P <b>V</b> --D <b>S</b> T <b>L</b> R <b>D</b> F <b>C</b> G <b>R</b> C <b>I</b> R <b>E</b> F <b>L</b> K <b>W</b> S <b>I</b> K <b>Q</b> --                        | 1043                                                     |      |
| Query_10005 | 971  | <b>P</b> V <b>L</b> L <b>R</b> L <b>G</b> C <b>D</b> V <b>D</b> T <b>T</b> R <b>Q</b> L <b>F</b> E <b>P</b> L <b>V</b> Q <b>L</b> I <b>H</b> W <b>F</b> T <b>N</b> N <b>R</b> K <b>F</b> E <b>S</b> R <b>D</b> T <b>V</b> A <b>M</b> L <b>E</b> A <b>I</b> L <b>D</b> G <b>I</b> V <b>D</b> P <b>V</b> --D <b>S</b> T <b>L</b> R <b>D</b> F <b>C</b> G <b>C</b> V <b>R</b> E <b>F</b> L <b>K</b> W <b>S</b> I <b>K</b> Q--                       | 1047                                                     |      |
| Query_10006 | 955  | <b>P</b> A <b>M</b> L <b>K</b> L <b>A</b> C <b>D</b> V <b>E</b> Q <b>V</b> A <b>K</b> Q <b>L</b> F <b>E</b> P <b>L</b> T <b>M</b> Q <b>L</b> I <b>H</b> W <b>F</b> T <b>N</b> N <b>K</b> M <b>G</b> E <b>S</b> E <b>T</b> M <b>A</b> L <b>L</b> D <b>T</b> I <b>F</b> D <b>S</b> I <b>Q</b> A <b>D</b> --D <b>T</b> S <b>L</b> R <b>D</b> F <b>S</b> G <b>C</b> L <b>R</b> E <b>F</b> L <b>H</b> W <b>S</b> L <b>K</b> Q--                       | 1031                                                     |      |
| Query_10007 | 972  | <b>P</b> A <b>M</b> L <b>Q</b> L <b>A</b> C <b>D</b> V <b>E</b> L <b>V</b> A <b>R</b> Q <b>L</b> F <b>E</b> P <b>L</b> T <b>M</b> Q <b>L</b> I <b>H</b> W <b>F</b> T <b>R</b> S <b>K</b> V <b>F</b> E <b>N</b> P <b>E</b> T <b>A</b> A <b>L</b> L <b>N</b> A <b>V</b> M <b>E</b> G <b>L</b> D <b>I</b> D <b>P</b> S--N <b>A</b> S <b>L</b> R <b>D</b> F <b>C</b> A <b>S</b> C <b>I</b> R <b>E</b> F <b>L</b> K <b>W</b> A <b>L</b> K <b>Q</b> -- | 1048                                                     |      |
| Query_10008 | 950  | <b>P</b> V <b>L</b> L <b>K</b> L <b>A</b> C <b>D</b> V <b>E</b> V <b>P</b> K <b>Q</b> M <b>F</b> S <b>T</b> L <b>F</b> V <b>Q</b> I <b>L</b> H <b>L</b> F <b>S</b> G <b>T</b> D <b>F</b> A <b>N</b> K <b>M</b> V <b>T</b> S <b>C</b> L <b>L</b> D <b>T</b> L <b>M</b> D <b>G</b> L <b>C</b> F <b>W</b> --N <b>S</b> L <b>R</b> D <b>Q</b> S <b>A</b> Y <b>I</b> S <b>E</b> Y <b>C</b> R <b>W</b> S <b>M</b> R <b>K</b> --                        | 1026                                                     |      |
| Query_10009 | 1055 | <b>P</b> A <b>L</b> L <b>R</b> L <b>A</b> V <b>D</b> V <b>E</b> V <b>A</b> R <b>Q</b> L <b>F</b> S <b>P</b> L <b>I</b> M <b>Q</b> L <b>V</b> H <b>W</b> F <b>T</b> K <b>N</b> V <b>R</b> A <b>E</b> N <b>D</b> E <b>T</b> M <b>A</b> L <b>L</b> N <b>S</b> I <b>D</b> A <b>V</b> N <b>G</b> E <b>D</b> --G <b>A</b> L <b>R</b> E <b>F</b> G <b>A</b> R <b>G</b> E <b>F</b> A <b>S</b> W <b>S</b> L <b>K</b> H <b>A</b> --                        | 1131                                                     |      |
| Query_10010 | 1024 | <b>P</b> A <b>L</b> L <b>R</b> L <b>A</b> I <b>D</b> T <b>D</b> P <b>V</b> P <b>R</b> R <b>I</b> F <b>R</b> R <b>L</b> V <b>A</b> Q <b>L</b> I <b>H</b> W <b>F</b> T <b>N</b> N <b>A</b> Q <b>Y</b> E <b>N</b> E <b>T</b> M <b>A</b> L <b>L</b> Q <b>C</b> L <b>D</b> A <b>I</b> C <b>D</b> T <b>W</b> --G <b>S</b> L <b>R</b> D <b>Y</b> G <b>A</b> E <b>C</b> L <b>E</b> F <b>L</b> I <b>W</b> S <b>I</b> K <b>Q</b> --                        | 1099                                                     |      |
| Query_10011 | 985  | <b>P</b> A <b>I</b> L <b>R</b> L <b>A</b> D <b>T</b> D <b>V</b> L <b>T</b> R <b>Q</b> L <b>F</b> D <b>V</b> K <b>Q</b> L <b>I</b> H <b>W</b> F <b>T</b> S <b>N</b> Q <b>K</b> E <b>N</b> P <b>D</b> T <b>M</b> A <b>L</b> L <b>D</b> A <b>I</b> L <b>D</b> G <b>L</b> V <b>D</b> P <b>D</b> --N <b>G</b> S <b>L</b> R <b>E</b> F <b>C</b> A <b>D</b> M <b>F</b> S <b>E</b> F <b>L</b> Q <b>W</b> S <b>V</b> R <b>H</b> --                        | 1061                                                     |      |
| Query_10012 | 935  | <b>L</b> P <b>L</b> L <b>K</b> L <b>G</b> C <b>D</b> P <b>A</b> I <b>H</b> R <b>L</b> Y <b>N</b> L <b>L</b> V <b>Q</b> L <b>V</b> H <b>W</b> Y <b>S</b> S <b>F</b> K <b>L</b> K <b>S</b> E <b>V</b> E <b>L</b> I <b>Q</b> T <b>L</b> M <b>D</b> G <b>I</b> T <b>H</b> P <b>T</b> --D <b>T</b> A <b>L</b> R <b>D</b> F <b>S</b> A <b>R</b> C <b>H</b> E <b>F</b> V <b>W</b> S <b>V</b> K <b>Q</b> --                                              | 1011                                                     |      |
| Query_10013 | 965  | <b>P</b> A <b>V</b> L <b>R</b> L <b>A</b> C <b>D</b> V <b>D</b> L <b>V</b> P <b>K</b> Q <b>L</b> F <b>S</b> P <b>L</b> V <b>M</b> Q <b>I</b> I <b>H</b> W <b>F</b> T <b>S</b> N <b>Q</b> K <b>S</b> S <b>R</b> T--E <b>R</b> E <b>V</b> V <b>L</b> L <b>D</b> A <b>I</b> L <b>T</b> G <b>L</b> A <b>D</b> A <b>K</b> --N <b>A</b> S <b>L</b> R <b>D</b> F <b>C</b> A <b>S</b> C <b>L</b> R <b>E</b> F <b>L</b> H <b>S</b> I <b>K</b> Q--         | 1040                                                     |      |
| Query_10014 | 978  | <b>P</b> C <b>L</b> F <b>L</b> G <b>S</b> C <b>D</b> T <b>D</b> H <b>F</b> V <b>R</b> N <b>L</b> F <b>Q</b> P <b>L</b> V <b>M</b> Q <b>I</b> I <b>H</b> W <b>F</b> T <b>G</b> N <b>K</b> Y <b>E</b> S <b>S</b> D <b>T</b> I <b>Q</b> L <b>L</b> G <b>C</b> I <b>M</b> E <b>S</b> L <b>V</b> D <b>E</b> K--N <b>A</b> A <b>L</b> R <b>D</b> F <b>S</b> V <b>N</b> C <b>L</b> E <b>F</b> L <b>K</b> W <b>S</b> I <b>K</b> H--                      | 1054                                                     |      |
| Query_10015 | 953  | <b>S</b> A <b>M</b> L <b>R</b> L <b>A</b> C <b>D</b> P <b>D</b> H <b>T</b> R <b>Q</b> L <b>F</b> L <b>T</b> S <b>Y</b> Q <b>T</b> I <b>H</b> W <b>F</b> T <b>N</b> N <b>R</b> F <b>E</b> N <b>V</b> D <b>T</b> M <b>V</b> L <b>L</b> E <b>A</b> L <b>M</b> E <b>G</b> I <b>V</b> T <b>A</b> N--D <b>P</b> A <b>L</b> R <b>D</b> V <b>S</b> A <b>Q</b> C <b>L</b> A <b>E</b> F <b>V</b> K <b>W</b> S <b>R</b> K <b>Q</b> --                       | 1029                                                     |      |
| Query_10016 | 967  | <b>P</b> A <b>L</b> L <b>Q</b> L <b>A</b> C <b>D</b> V <b>D</b> E <b>V</b> A <b>R</b> K <b>L</b> F <b>E</b> P <b>F</b> T <b>F</b> Q <b>L</b> I <b>H</b> W <b>F</b> T <b>T</b> K <b>R</b> M <b>I</b> N <b>S</b> D <b>E</b> T <b>K</b> Q <b>F</b> V <b>Q</b> V <b>I</b> D <b>G</b> L <b>V</b> Q <b>S</b> K--D <b>A</b> V <b>F</b> R <b>D</b> F <b>S</b> A <b>R</b> C <b>L</b> E <b>F</b> V <b>Q</b> W <b>S</b> I <b>K</b> Q--                      | 1043                                                     |      |
| Query_10017 | 973  | <b>P</b> V <b>A</b> L <b>Q</b> L <b>A</b> C <b>D</b> V <b>D</b> R <b>V</b> A <b>E</b> Q <b>L</b> F <b>R</b> P <b>L</b> V <b>F</b> Q <b>M</b> I <b>H</b> W <b>F</b> T <b>R</b>                                                                                                                                                                                                                                                                    |                                                          |      |

Supplementary Figure 5: COBALT analysis DNA-PKcs from representative examples from all major phyla (short list)

|             |      |                                                                                  |      |      |
|-------------|------|----------------------------------------------------------------------------------|------|------|
| Query_10001 | 1040 | -TSPKEMEAG---PANPKRLKRMYSLLEHPSMSMRLGGALMFNSIYVFPREED-ALVDQFSLQILSVLVNSLAL       | AH   | 1111 |
| Query_10002 | 1066 | -TSKKQKEKS---PINTKSLKRLYSMALHPSFRRKLGAAALTFNHIYTVFPREED-SLIDQFVCEILVTFVNSLAL     | AH   | 1137 |
| Query_10003 | 1066 | -TTPKQLEKS---PINIKSLKRLYSLALHPNPFNRKLGAAALGFNSIYRDFREES-SQVDMFTFELLVTFVNSLAL     | AH   | 1137 |
| Query_10004 | 1044 | -ITPQQKEKS---PVNTRKSLFKRLYSLALHPNAFKRRLGAAALFNHIYRDFREES-SLVEQFVFEALVIYVESLAL    | AH   | 1115 |
| Query_10005 | 1048 | -TTPKQKEKS---PANTKSLFKRLYSLALHPNFKRRLGAAALFNHIYRDFREES-SLVEQFVFEALVIYVESLAL      | AH   | 1119 |
| Query_10006 | 1032 | -SSVKTVEKS---PVNASSILRRIFSFALHPSVFKRRLGAAALFNHIYQIFREEK-SLVDRYTFQILVHFVESLAL     | AH   | 1103 |
| Query_10007 | 1049 | -TSPAQLRKN---PHIPKSLFKRLYSFALHPSFRRKLGAAALFNHIYRDFREED-VLLDIFTFEILETFIESLAM      | AH   | 1120 |
| Query_10008 | 1027 | -VDSGGQNMRS---SKVELLQVTTIITFAVHSSAVKRAGAAVAFNNLYKIITREKR-WLVDIYILEMFTFMKSLYL     | AE   | 1099 |
| Query_10009 | 1132 | pTTKSTANEArS-AFNFKSLKRVYSLAAHPSAQKRLGAAALSLIRVREDD-NLISVFLFEIAHQVLLSMRL[4]       | AD   | 1210 |
| Query_10010 | 1100 | -SSATHAESsm---NMKSLKRLYNLCAHPDYTKRRLGASLAINNIYRDFREED-YLVDQFTEFELLXWMLVNLRL      | SD   | 1171 |
| Query_10011 | 1062 | ----APEDDnf---VNVRSMLRRVYNRMAHPNYPHRLGAAMAHRMYPVLENG-AIVDRYIFELFFCIKSLKL         | GE   | 1131 |
| Query_10012 | 1012 | ----GSHV---NIRYVMKQIYSFCLHPCPSKRLGAAALVNLVSVYTVLREEE-SVNVQFWLELLYHMVNLSL         | SE   | 1076 |
| Query_10013 | 1041 | -STDKLLLETGgl---VKVLLKRMISMAAHPNAFQRMGAALAMNNIYTRLRESD-TLVDVYVCELTDFVFMRSIQL     | AH   | 1111 |
| Query_10014 | 1055 | -TPLSKQENSaptPVNAKSLKRIKFNPLTHPNANKRLGACLAWSVYTIFFREEE-SIVNRHIFELIFLYIESLAM      | SE   | 1129 |
| Query_10015 | 1030 | -CRQQNSVSS---NIKSLIKRIFSFCKHPSAFKRLGALAWNSIYREIREDE-QAVDIWTLDDLAAHMTSLDL         | AQ   | 1099 |
| Query_10016 | 1044 | -TSVREQEEN---PIGMNVVNLCLNYSLHPNYPKRLGAAALFNHIYTIFFREEE-SLVDKFTLEIAVHFIESLAI      | AH   | 1115 |
| Query_10017 | 1050 | -TSKKQKERS---PMNTRKSLKRLYSMSGSPSTAKRRLGAAALFNHIYTVLREEE-SLVDVFIIEMLVVMVNSLKL     | AH   | 1121 |
| Query_10018 | 1029 | -TTKKQKEKT---SNNKSLKRLYSLASHPSAIKRLGAAALFNHIYVVLREEE-TLVDTFIFELIFVNYVNSLAL       | SH   | 1100 |
| Query_10019 | 1060 | -SSEKQLEKS---PINIKSLKRLYSLALHPSASKRRLGAAALFNHIYTVFEEA-SLVDIFVLEILVNLVLECLCL      | SH   | 1131 |
| Query_10020 | 1014 | ----PQIKAhY-----IFNRVFLSCLRHPSVQRSGAAVSIYFLQSLREDEGALTRFAMPCLKNLLYALRL[4]        | AQ   | 1082 |
| Query_10021 | 1090 | pSSGADSTASfy-SRNVKSIVKRVCLLALHPASSKRLGAAALFNVAVYQFPREED-SLVNFAFELLHCFMRSIQL      | AD   | 1164 |
| Query_10022 | 1026 | -MTDKNKEMpn---NIKSLIRRIESENHPDPKRLSSVLCFSKIFSVIREHD-PLIDRFCEIAHNVLGSLKM[4]       | IE   | 1101 |
| Query_10001 | 1112 | R--DDKS-L--GTQEQCKSALLHVERILIKKQVT-FNKDSKQRIKPRGWRDA---NMTTAVRWLLRQCGRPQTECRHVC  | M    | 1182 |
| Query_10002 | 1138 | H--DDKS-L--GTQLHGVEVLNHLERIRVKADM-LNKESKIRRIIPREFPAGVcpTfSMLVIWLLRQCGRPQTECRHQC  | M    | 1211 |
| Query_10003 | 1138 | H--DEKS-L--GTQAQCVAVLTHLDRIITTKADL-LNKHSKVRVRPRGFDFRESppTLPDLVWLLQCGRPQTECRHRC   | M    | 1211 |
| Query_10004 | 1116 | A--DEKS-L--GTIQCCDAIDHLCRIIEKKHVS-LNKA-KKRRLPRGFPSPAslCLLDLVKLLAHCGRPQTECRHKS    | I    | 1188 |
| Query_10005 | 1120 | A--DDNS-L--GTVQCCDAIDHLNRIIQKASA-LNKP-IKGRVPRGFPDPqVSLKEVVMWLLTQCGRPQTECRHCK     | M    | 1192 |
| Query_10006 | 1104 | K--DDKS-L--GTQEQCAAVLKHQRITIFHEDI-LKKPSKIRQEPREWSNK---TLDIAVRWLSRQCGRPQTECRHTC   | M    | 1174 |
| Query_10007 | 1121 | H--DDKS-L--GTQEQGVQLNHLERIVNKAAL-LCKDSKIRKPKTWNKA---TLDICVRWLLRQCGRPQTECRHSS     | M    | 1191 |
| Query_10008 | 1100 | N--DDEL-Y--GTVDECKQAIKHIRRIILHNLDM-LQIHNVQRRTPNEWSQST---VHCCDVLNLTMTWSNYQFRSECF  | F    | 1170 |
| Query_10009 | 1211 | EgdDTTTL-levEVGKQLQAVIDAVRVRIERRAEL-LNRTNNNRREHKD-----LADFVGVVFGVGRMERVRVFTSI    | I    | 1280 |
| Query_10010 | 1172 | N--DQSA-T--GTROQATSAIRHLKIIIVKSNLFLNTPRRKFP-NLNRSD---LSSLTEWLFIESTRKKEQDYSSMCR   | R    | 1242 |
| Query_10011 | 1132 | L--DDEQ-I--GTMKQMNKTVELLQRLVNTITL-LEKKRKRDP-----fLALDDFLQWVFEQTRLLHGRSRTCKM      | C    | 1197 |
| Query_10012 | 1077 | E--TDSI-L--GGQEQVTVAVNHIERVLEKKAAL-FNKEEDNIRKPPPEFGIL---LKDVAWSLLKCGTVQVCECRHK   | M    | 1147 |
| Query_10013 | 1112 | R--DDPA-M--GTATHTERVLTNLRRIILKKAADK-FRRTSRVRRIPPGWETCT---LAEMTRWSLTHACDLHAARHQAM | C    | 1182 |
| Query_10014 | 1130 | N--DDKM-F--GTQEQCKLGLDHVERIIFKSDI-LNQIDPKRVKPPGWSEPV---LEVAVRWLMRQCGRPIETECRHK   | M    | 1200 |
| Query_10015 | 1100 | V--DDPA-L--GTHEQKTSAINHIERIRVKSAL-FQKSGQRRLPPGFGDGT---LVDVLEKWLFEQCGRPKALVRHTC   | M    | 1170 |
| Query_10016 | 1116 | Y--DDKI-L--GTQKCKQALNHLERIMEVKAL-LSKTSKRRPLRNINDSI---LPEVVEWILKNCGCLQTECRHK      | M    | 1186 |
| Query_10017 | 1122 | K--DAQS-I--GTVQCSLSLDHMSRIKAKASTLSKANKNRVPRGLKSAD---SILTAWLLAQCSIETEARKMCR       | C    | 1193 |
| Query_10018 | 1101 | T--DEKS-L--GTQEQLSKALAHIERIKAKAST-LNKEKNRRTPTGFMTKT-vTLHHVVNWLVRCGRPQTECRHQC     | M    | 1173 |
| Query_10019 | 1132 | G--DEEA-R--GTQEQCVQVIHLEIRIHSRAQL-LVKENHRRRIPRGFASQSSiTLIHMIPLWLVKQCGRPSSSECRHQC | M    | 1205 |
| Query_10020 | 1083 | Y--QIGGD--VAREIMLNAVMTERGICRPHLFLSDSSTYSIDNDY-----TLHQMTQWLFQQTGARBEQFRRLCR      | R    | 1152 |
| Query_10021 | 1165 | A--DDAS-L--GTVQCNLALDHLERIMVRAAT-LKVESQGRRTPLGSKWTS-aTLEAVRWLVQCGQPEACRAAM       | A    | 1237 |
| Query_10022 | 1102 | F--SQEV-----IDNCIMMLEKVKVQVKRISi-LMNVNPKRSIHQSVFTFI-----LYLFEKFVAIETVCRRES       | M    | 1164 |
| Query_10001 | 1183 | RLVCQ LAPCVHEIN GARE--LFSVLLSQ-gNSEYFIQR---FFGMYSSA--RMGLNQK PTMSRVQENF-         | 1243 |      |
| Query_10002 | 1212 | ILYIK ITPLLPGHN TPQT-WMQNTLKEK--GPDYFVSR---FEGGVKAA--SRSGISKY PTLSTMGPFF-        | 1273 |      |
| Query_10003 | 1212 | LLVCS FLPLPRKP SPQA-WMKERLKEK--GPDFFITR---FEGGGKGTG-hKSGIKKH PKISTMDSTF-         | 1273 |      |
| Query_10004 | 1189 | ELFYK FVPLPGNR SPNL-WLKDVLKEE--GVSPFLINT---FEGGGCGQP--SGILAQ PTLLYLRGPF-         | 1248 |      |
| Query_10005 | 1193 | VLFFE LVPLPGNK TPSC-WLADVLKER--GVSPFLIGK---FESAGSDHA-kCSGIYQ PTLKDLQEPF-         | 1254 |      |
| Query_10006 | 1175 | KLVDN LCT----- HVQgnyFVSDFLDIdvDKSTIiKK--vFEGGATATH-gKSGISAC STLKISDTF-          | 1234 |      |
| Query_10007 | 1192 | MLVYK LAPCVPEFQ SVQG-FFQKFLKMEsgGPYFMERfeaYRLGTT-----RFTLMKC HTLGDIGEQF-         | 1254 |      |
| Query_10008 | 1171 | ISYQE LTD-----A EIEKlHFLRHIGTS---IFGFIH---FERSHRSVL-gSFSICNL[2]---RVIKGTS-       | 1226 |      |
| Query_10009 | 1281 | ALFGR VVQLLPQK[4]----WIHQVQVKH--GLAALIKMaepQTASAMP-kLDGNHR[2]-----EF-            | 1339 |      |
| Query_10010 | 1243 | ELFGE FVKLLPDFK[4]----WVKARIDRD---PKFLES1--YKNSLSFSPS----NVLHK[2]----AAQTK-      | 1298 |      |
| Query_10011 | 1198 | MLFCS ICLSIPEGCS --SahwFRANICSG---DQVSSVtkqFDVGMYPH--HPSLQOE[2]-----             | 1250 |      |
| Query_10012 | 1148 | ELVYV LAPLLPVCK SGSE-FVSWYAATH--SWTSIIRIc---EGSKESG----GITV-[1]PTLKHLRNEV-       | 1205 |      |
| Query_10013 | 1183 | AFPLH LAPLDTPDE TGKP-YATAHAWAafGAPALVALv---EQGSAPQP--LLGVSVK[1]--LEHSRAS-        | 1244 |      |
| Query_10014 | 1201 | ELSHK LAPNISGVK DIKD-YFNIRLVNE--SEMYFLAR---FEGSTLKEKilKTSLSY QSFLLDTGPKF         | 1264 |      |
| Query_10015 | 1171 | ELLAS LAPQVKGCA SVRD-FIEKYVGIS--KLSIIVDil---EGGGEAKM----GISYV[4]ASSKHTGSSL       | 1233 |      |
| Query_10016 | 1187 | ELVFO LAPCLSGFN GCKD-YFSHLLETk--GKKYFLNC---FESEMS-----NTV PSFNQNDGLK-            | 1240 |      |
| Query_10017 | 1194 | KLLVQ LAPPSSNVV NIRM-WIRKTIeSE--GGNYFVTR---FESHG--SGILKA PTLAPAP----             | 1247 |      |
| Query_10018 | 1174 | QLVYG LAPQLSGVS TIQD-WVKTIIGSS--SVTFFITR---FEGGGS--K-y--GIGRY QTLADISDTF-        | 1231 |      |
| Query_10019 | 1206 | RLISK LAPLLPGVN SAAD-WMKKT-HED--HPSSFVHR---FEGGGGGGQ-k--GIEQY PTLAHIGGHF-        | 1264 |      |
| Query_10020 | 1153 | RIFLS FSALISTST[2]----WM-----hnYETVQERKS-----ILAV[2]--PLSALHTV-                  | 1196 |      |
| Query_10021 | 1238 | RLLVN[18]LLTSSPEKR[5]SPRQ-FFQALLKQF--KANYFYDRwerFOPHQQQQ-----H[2]-----GPL-       | 1313 |      |
| Query_10022 | 1165 | KLWEA IVRCIPPTN[5]DNPVkwIFSYYLQR--rGEKAIKRRfakISFIEQNYDdqNDQLNHR[2]--SEAVRKT-    | 1237 |      |

Supplementary Figure 5: COBALT analysis DNA-PKcs from representative examples from all major phyla (short list)

|             |      |                                                                                      |                   |      |
|-------------|------|--------------------------------------------------------------------------------------|-------------------|------|
| Query_10001 | 1244 | SLNAACTWFDLVLATLDCYTWVFGERLMSPNQILIA--SNNKGTIFQV--LHFMELAQED                         | ISAAVKLPFKVAD     | 1315 |
| Query_10002 | 1274 | SVKLACSWFDHLLAALDCYTWVFGKLLSPSVYTT--TARRPSVLFQSS--LQYFLSSLSLLD                       | ITGAARGIEYGGG     | 1345 |
| Query_10003 | 1274 | TVKTAVSWFDLHLLAALDCYTWVFGKLLSPSVYTT--TARRPSVLFQSS--LQYFLSSLSLLD                      | IDAARCFESHGA      | 1345 |
| Query_10004 | 1249 | SLQATLQWLDLHLLAALDCYTWVFGKLLSPSVYTT--TARRPSVLFQSS--LQYFLSSLSLLD                      | IIAAEKCFGTG--     | 1316 |
| Query_10005 | 1255 | SVRAALQWMDLHLLAALDCYTWVFGKLLSPSVYTT--TARRPSVLFQSS--LQYFLSSLSLLD                      | ITAABECPFTLG--    | 1322 |
| Query_10006 | 1235 | TLTSTMNWFDLHLLAALDCYTWVFGKLLSPSVYTT--TARRPSVLFQSS--LQYFLSSLSLLD                      | IDEVSKLF--KESS    | 1305 |
| Query_10007 | 1255 | TVKNAVWLDLHLLAALDCYTWVFGKLLSPSVYTT--TARRPSVLFQSS--LQYFLSSLSLLD                       | IEAADLFTKGLD      | 1324 |
| Query_10008 | 1227 | --IYALVWLELTYEAMIDGYVWALNTRNRSNEAWNyDl---NEDPRVKSL---LFPCLDLVN                       | SIVIGRHPFNLSK     | 1295 |
| Query_10009 | 1340 | -----WMRRLQASLAVYIWFYFGEFTDPAVLSKdGs-----SRIISN-aFYVFLSEYALVD [1]-----SH             | 1329              |      |
| Query_10010 | 1299 | -----DWCRRFLSVLANYKWLKKEKFPVPLDLITsSg-----IMFRK-aINyFLENLVQND [6]PDAMEIDDGEYFI       | 1367              |      |
| Query_10011 | 1251 | -----WLTkFVRSIHWFEWALKENIISIKELLDfEr-----DCVIHIAssISAFLOSLKLSQ [1]-----              | 1303              |      |
| Query_10012 | 1206 | ALVYVVRWLRMVLTSFDYVWLFGEELVKPSVLWGtEgLDNTSETRIFEA--AVYFIQHVCCHR                      | ASSVTCLLSTDTK     | 1280 |
| Query_10013 | 1245 | -----HEWLERLQATLEAYQVLVLSHRLLTFRALLVdC-----EMLLWGA--LAHFLST-----                     | -----FPRRSE       | 1296 |
| Query_10014 | 1265 | QFGLLVVWLVKLLNALDLCYTWVFGKLLSPSVYTT--TARRPSVLFQSS--LQYFLSSLSLLD                      | --SFLQNFLSHNY     | 1329 |
| Query_10015 | 1234 | KDINI--FLEALASLDGCVWLIQGQVPAAKLL-----NHSELQLFSA--TTYFINEMALLT                        | VSEY--MKNHDAF     | 1298 |
| Query_10016 | 1241 | ---PIINWLEGLHTMLDCYTWVFGKLLSPSVYTT--TARRPSVLFQSS--LQYFLSSLSLLD                       | FDQRVQAFTHES      | 1308 |
| Query_10017 | 1248 | NINIAINWLVKLLNALDLCYTWVFGKLLSPSVYTT--TARRPSVLFQSS--LQYFLSSLSLLD                      | IEGVVNSPEVAMA     | 1317 |
| Query_10018 | 1232 | NLRSMKNWYDYFLAALDCYTWVFGKLLSPSVYTT--TARRPSVLFQSS--LQYFLSSLSLLD                       | LDETVKLLYS---     | 1301 |
| Query_10019 | 1265 | SLKETILWFDFVLAALDCYTWVFGKLLSPSVYTT--TARRPSVLFQSS--LQYFLSSLSLLD                       | ITEATSCTSPGSS     | 1338 |
| Query_10020 | 1197 | ---ITVDWLEQLSACIENYVWVEMVLGDKTRGfEiCgSgHKKKSVKRRH---TAEVSDTNNEN [4]LSWALLTFLNCDG     | 1271              |      |
| Query_10021 | 1314 | -----RALLACLECHLWLSGGGLLDPQLLgCgG-----GSRLCQR--LSDFFNETDPSLD [5]LSASVASSASSYN        | 1380              |      |
| Query_10022 | 1238 | --LSEKQKTIEMLTAQIECFNLLSRKIASFQDKSkLv-----dINVMGNLYSFL                               | ADHIVIKFVKNER     | 1300 |
| Query_10001 | 1316 | GSS---IFTPREREDYNTKCTVIVRVLTSFICTMFGNYKTESL--KVIP-TSFWSSNLWD                         | TLLAVLQPTQLGFNM   | 1385 |
| Query_10002 | 1346 | KTSAFhgVFTPRESEENYQEKCTVIVRVLWDFLTVLWLNENYSDAV--KVIP-KSIWQDLSFD                      | LVVTCILQPTVVGFM   | 1419 |
| Query_10003 | 1346 | AT----LFTPRETEDYNYGKCTVIVRIMDFFTVLGAFPODAY--KVVV-DAVWKSPLYD                          | MVVTAALEPTALGFNM  | 1414 |
| Query_10004 | 1317 | --AAG--nRTSPQEGERYNYSKCTVVVRIMEFTTLLN--TSPEGW--KLLK-KDLCNTHLMR                       | VLVQTLCEPASIGFNI  | 1386 |
| Query_10005 | 1323 | --VKG--vLFSPPREEREYNYCKCTIIVRIMEFACLLLEGLQDQCW--KVLE-KDLNLSDLFE                      | LIAMVVIDPITSIGFNI | 1393 |
| Query_10006 | 1306 | VE----YFTPREIEDFNRNKCTVIVRITMFKFCSQVLSNAQSGYAE---IE--DLALRTIFM [9]LLCLVLLKPRQLGLVI   | LLIKCVVQFQSVGFNM  | 1374 |
| Query_10007 | 1325 | RK----IFTPEWEVEENYSKCTVIVRHLDFLCSITKSGSHLE--QVVP-SNIWCPDLWI                          | LICDCVLPNSALGFNM  | 1393 |
| Query_10008 | 1296 | AQRNR---LTPREIDQFMTLKCOLEHVYALFMSMLEKYNYSQV---ME---TGGQL [2]VVGVSLLTFAVVGVRT         | AFLLKACDPKSLGFRL  | 1358 |
| Query_10009 | 1393 | PAMAS---LTPREIDQFMTLKCOLEHVYALFMSMLEKYNYSQV---ME---TGGQL [2]VVGVSLLTFAVVGVRT         | 1459              |      |
| Query_10010 | 1368 | KNVGSenILTPAQKQLWLRKIQIIEHLIGFINVLFKFTDPNNV---E--SLWNSNING [5]LLGNCLLRPNIIIGLDVI     | 1442              |      |
| Query_10011 | 1304 | --SIHQfLDLTPGEGQDELQKLRYEATTHLMFKFCSQVLSNAQSGYAE---IE--DLALRTIFM [9]LLCLVLLKPRQLGLVI | 1382              |      |
| Query_10012 | 1281 | DVLEI---TPWEAESFDRTKCFVTRIRLLDMISTVLSKSGE--AG--CLP-HSLLNLQQLQ                        | LIVACVLPNSALGFDL  | 1347 |
| Query_10013 | 1297 | LKRHD---TPAEAAAYRYLKCTVMVRVLDVFRVTLR---VDAS--ALP-TKLWSGECLD                          | FICKAVLMPIMLDPDF  | 1362 |
| Query_10014 | 1330 | TEAHI---LFPSPNEIDEYNGLKCTVMIRLMDFLETIFANYSKESL--DVIP-MSLWNSNFFG                      | LVINMTLNPSTLGFSL  | 1401 |
| Query_10015 | 1299 | QNAVA---TPYEETAAKLKCTVIVRLLDFVSVVLQEGPKVAS---LLSghSVWSATMFS                          | LLTCCTLDPASVGFDI  | 1368 |
| Query_10016 | 1309 | VKKIQI---FSPKEKDEYLRNLCFTIIVRLINFTVTVENYHLQ-L--NTIP-STFWSINFNW                       | CYSSVNLNPKFLGFDL  | 1378 |
| Query_10017 | 1318 | TSIH-----ERGEYQRNKWCTIEELLFLFIELLTKHTSETVsfEYVP-DSLWSQELYT                           | IVMDSLIFYSSLVNTAP | 1385 |
| Query_10018 | 1302 | KSTL--gLFTPREIEEYNMCKCTIIVRLINFLVLLQMSPTSII--EGIP-RQIWSQNLFE                         | MIFLCILTPHQGFNV   | 1373 |
| Query_10019 | 1339 | RGMG--dIFTPEKEIDDYFRACKCTVIVRVLNFTLILQDFPQETL--KTLP-PEFWSDELFE                       | VVLSVLEPVGVGFMH   | 1410 |
| Query_10020 | 1272 | SRNYR---SKRSRTEAYLSVLSLNCNFKVAKIMSHGNILLR--ETLD--LDNQLSRD [5]--LVEVLFHRADLQLHN       | 1341              |      |
| Query_10021 | 1381 | SISEI-----RASAVTIRCOLIVRTAALLQLLAGRQPDCCLK--DLLQ-GKENSNGLWT                          | ALARATLRFQLGFDA   | 1446 |
| Query_10022 | 1301 | KSLDK--LILCKEKDKELTKSRMVLITQFLRYLDQDDEESLLAHA--DLFQ--KNCNFNLIH [4]IMVIPLEHLQQLVLED   | 1376              |      |
| Query_10001 | 1386 | GQ VEV--MNNLPEQTLGTL-QILMRSLP--RNLAQELIESVSRHLN-MSS--CDLSSKLPIPLEPNQD---YIQL         | 1450              |      |
| Query_10002 | 1420 | AD VEI--MNNLPKTRKLL-RLMSTHLP--ANLRNLSKAVTRSVT-KSS--HDDLTKLLQSMFGRDEGLTtdHGKL         | 1488              |      |
| Query_10003 | 1415 | GD VEI--MEKLPQETKQLL--LLMCRSLP--SQQALLKSQVAAKLS--RRS--SHDLFSLHPEVSAGVAEL--dhVRL      | 1481              |      |
| Query_10004 | 1387 | GD VQV--MAHLP---DVCvNLMKALKM--SPYKIDILETHLREKIT-AQS---IEELCAVNLGPDPA-QV-dRSRL        | 1448              |      |
| Query_10005 | 1394 | AD VQV--MKNLP---NVCvKLLNAVVK--SFFKETLVDSVRKRIIT-AQS---IEALCNVDLYSPGA-RT-dHAGL        | 1455              |      |
| Query_10006 | 1375 | GD VEV--MNNLPSEV-----PTKLMFVGITNFSDL-----FSLLTNLS--LNNPVG---HTVL                     | 1421              |      |
| Query_10007 | 1394 | GD VEV--MMKLPPEQEQVL-RIFSRYP--PKALDMFRRLTKSKLD--SGS--YNLLKLLPHILSGPSED---HMTD        | 1458              |      |
| Query_10008 | 1359 | YS KQF--FECISQDVRLLF--LALKNN--TFLVQVSTSMKEYLT-QFY---PWPVDESVVTCDSHLAI-----EQ         | 1419              |      |
| Query_10009 | 1460 | ID [11] KQV---NELP--LNLIVGRVQCLIVNggDKYRDTLIGYLGEMIS--SSS--CNLGEIGVLTITTEGTRDLV----- | 1533              |      |
| Query_10010 | 1443 | LP DNIVk-QKLIQVETLkLkFKKLSInn-----VTQLAQDLA-EIAfSDEVDLLNIELDKSDPTY-----              | 1502              |      |
| Query_10011 | 1383 | SE LQRa--QDLAKLASKVLTFRFTQLSSN---LKSEMVELLRRVIEgDDPaYDLNLSFSSKISGPKAL--sLEDA         | 1451              |      |
| Query_10012 | 1348 | YN TEV--TDGLPKNLIQLL-GVLQETLP--SSQLEELNSELGKAVS-SMQ--TDVLSNLQDLSLRNDK-VTL---EQ       | 1411              |      |
| Query_10013 | 1363 | SD PEI--EEKLPKKTGVVL--ASLCLS--GEPRTNLVAAMRTTLA-SDE--CDLLRMVRDVLPGRDIPAP-----LI       | 1425              |      |
| Query_10014 | 1402 | KN LEI--FSNLSPKIRQFY-KLVIQNLN--TDQKQFRQCCQKIIL-DSR--EL-NLDFLVL--KDIDWI---NL          | 1462              |      |
| Query_10015 | 1369 | KD TEV--SKHLPsrLEEL-GILARRG--SEVIGESDYLEKQLQ-KPE-NDIIKMLPLSSETAHINL---RS             | 1433              |      |
| Query_10016 | 1379 | TD TYI--FNQFPKERTTLL-KVFEYMP--KPLYNNFNEHLYEYLE-SKC--NIYNLFPNLNDKDKLIL---EI           | 1442              |      |
| Query_10017 | 1386 | DD PST--AKRISAAVACL-TAMCTSLP--IDVKQNLIAIASNIN-TGQtNNVINLFPVSYNESTSSG--ILLF           | 1453              |      |
| Query_10018 | 1374 | GD IEV--LEKLPQMKDVC-GLFQMKLP--KDKRELMIITLKELLS--RNRsYNLFDLLPDRDRDNELNI-dFERL         | 1442              |      |
| Query_10019 | 1411 | GD VEV--VEKLPQOTGVLC-KLLVQRSL--GECLERLKGTLEKIIA-LGShCNLFQDLPPLSNPQEHQV-dCLRL         | 1479              |      |
| Query_10020 | 1342 | AS SFRa-IEEFCSYVTMHS-----P-----QWAhQMOKMID-----                                      | 1371              |      |
| Query_10021 | 1447 | QD PSL--MAKLLDCLSTAWhAVARNLAPvgSSYRSSIVSAIAAELELAGQsvTVQRLLPQSGLASDPPSV---AGA        | 1517              |      |
| Query_10022 | 1377 | QE LER---QLRNQSELLLrKLVAIKNL-----DLAKIKKDIvPSMrc-INLNHMTVDNVQNYHPKML-----            | 1435              |      |

Supplementary Figure 5: COBALT analysis DNA-PKcs from representative examples from all major phyla (short list)

|             |      |                                                                                     |                             |                             |              |        |      |
|-------------|------|-------------------------------------------------------------------------------------|-----------------------------|-----------------------------|--------------|--------|------|
| Query_10001 | 1451 | RLLVSGFEQLNSAG--LLSNTLV--SKS--SEKLAEDLVNTVYFMGMVTAVD-[                              | 2]                          | P--TLVNLSPVQSQAELKMLTLAFQMG | 1522         |        |      |
| Query_10002 | 1489 | IHLVKGYEQLHQAN--LLSAAAT--GHGS--GSSFAVKLFITVFDLSLTTSDA[                              | 2]                          | L--LQANLTPLSVELAESLLDLAFLLG | 1562         |        |      |
| Query_10003 | 1482 | TLMVSGYQQLHNAQ--LLLPAAL--GTNS--GKSLASELVSVAVFKSMVTRKD-[                             | 2]                          | P--TAASLPPSFHQTLGGLQLACQLH  | 1553         |        |      |
| Query_10004 | 1449 | AAVVSACKQHLHRAG--LLHNILPQSQSTDLHHSVGTLELLSLVYKGIAPGDER[                             | 1]                          | C--LPS--LDLSCKQLASGLLELAFAG | 1522         |        |      |
| Query_10005 | 1456 | RSILSACQQLHKAD--LLNSAIDCEAGS1SSSLSKLLSVVYKGIAPGDER[                                 | 1]                          | S--LPS--IDVSSKQLADGLQLSFLG  | 1529         |        |      |
| Query_10006 | 1422 | OHLVSGYILNKTG--LLVNT-----NVQQLVFDTVYKVCYIPQFF[20]                                   | LkKIITLTPAASILGKSLDLDFSKLG  | 1506                        |              |        |      |
| Query_10007 | 1459 | SHLVAGYQLLHKTD--FLLPALKDGGHS--AENVSNNLQTLFQAVSEEDQF                                 | --RLECSPTLELSRKLLELACSMT    | 1530                        |              |        |      |
| Query_10008 | 1420 | QQLNLVYGMLEVEG--LQSVVELPRAE-----PLWTTVADVYFSKRIG                                    | -----LP                     | SKLGMVQKIFRVAALTG           | 1480         |        |      |
| Query_10009 | 1534 | --SLINGNYILKQGS--ILDVTLKFAKLS-----LPAMTSLFDYLNHEVDN[10]                             | EILVFIISTGKIQPSKLELYLPPIK   | 1612                        |              |        |      |
| Query_10010 | 1503 | DQITHGYQLVLSGG--LFPDLLEHEMTS YMNTSSKLYDYILAIWKKFNNL[4]                              | -----DPLWVELIRKLLS          | FALSLS                      | 1573         |        |      |
| Query_10011 | 1452 | LSLVKGYQLSQVK--ILPLVLNKVRA--GKGERLILTVFGI--EBOC                                     | -----P                      | PSLQPTAEMVNLA               | MSLG         | 1513   |      |
| Query_10012 | 1412 | RQLLKGLEILHKCGmLS--HIVKELPNqYGLDGNQIVRHLFSALVEGQGD                                  | MkRrTVVLQPAAFSYAESLLKFAFLLN | 1485                        |              |        |      |
| Query_10013 | 1426 | KNVVSgvQQLAAL--LLDECFFTRDA-----FGRELFAALFEYSHTSTPE                                  | -----P                      | TNLAAGLADLALS               | 1488         |        |      |
| Query_10014 | 1463 | SQTLAGYEILSDFK-----IF-----KITDMSKFFVFDLSQEEET-                                      | -----S                      | QTTEAKRKLFLSCL              | SIN          | 1516   |      |
| Query_10015 | 1434 | RHVIEGIGILEKSGwLAKCNVVS-----YSV--AKELVDWLCSIFKEQNL                                  | SvSGISPHSLLKFLYTMQLAITLD    | 1503                        |              |        |      |
| Query_10016 | 1443 | QEMLLGYEQLIENK-----LWPQNCnkSKKLACDMLSSVWESCILETEI[6]                                | -----L                      | NPVSLNFGKMLT                | VALKLD       | 1513   |      |
| Query_10017 | 1454 | NRLVQGHYIYAESNkCLSDVLKSMGISeEESLAMLRYNALTIIRGSSS[8]                                 | Y-----M                     | PLHLKGTGELLKGL              | LELS         | 1532   |      |
| Query_10018 | 1443 | TFLKGYKQLMTMG--IL--KTPADHKDIE---KIMKSVVDCFRGEMN[1]                                  | D--RTA--LS                  | PAQQVAAEELLDA               | FELN         | 1511   |      |
| Query_10019 | 1480 | AYLVQGYQLHCAG--LLLPAKAQARNaseEYAVKLFYAVYDGVKPSLNV[1]                                | L--Q                        | TVILD                       | PASQHLASKLLD | LAYDGL | 1554 |
| Query_10020 | 1372 | RMLKLHQSADVY-----SSES1SDHSTTISLTLFGSKVLSAEL[7]                                      | -----N                      | YAEFALVARKIVE               | YGH--G       | 1438   |      |
| Query_10021 | 1518 | VRLARGVRLRDCG--LLADSTADEKRQ-----ILDRCCQLAES                                         | --aQT                       | TQHPVLPQLIDAAL              | TYALNDS      | 1579   |      |
| Query_10022 | 1436 | MSMCLGYLKLASID-----PNIKEYLIS--FRSLPTIVEA[5]                                         | -----T                      | PISNESARVLV                 | KFLSKLE      | 1492   |      |
| Query_10001 | 1523 | YPEKN-LVELIFN----S NNIHVGVSTSVQ--CSPHGTLFYAAFKSVVNLNFVKSVEKFPV-L                    | LMRHL---                    | EANGE                       | 1586         |        |      |
| Query_10002 | 1563 | IEAKM-LVSCCLD---K TALFSG---RS--STSKGAVFYTFKTKLNGEMAVQQAQKVIP-L                      | LVREG---                    | GKDV                        | 1623         |        |      |
| Query_10003 | 1554 | PQGH-D-LDCCVMN---K TPLMTGGKKS--STFGMVVFTFKKCIQQLIKCAESLP-V                          | LLQQL---                    | TAEV                        | 1617         |        |      |
| Query_10004 | 1523 | GLCER-LVSLLLNPAVLS TASLGSSQSGSViHFSHGEYFYSLFSSETINTELLKLNLDLAVL-E                   | LMQSS---                    | VDNTK                       | 1591         |        |      |
| Query_10005 | 1530 | GQCEE-LVSLLLNMTMELS VPLSGATQKNPIFPHSGEYFYSLFSSETINAELLKSLKSAV-T-Q                   | LMRSA---                    | SENPK                       | 1598         |        |      |
| Query_10006 | 1507 | LKDNV-LITALLN----D DMIQGT--PSV--NLQHGAEFFLMFKSVICQYIAENGRITIP-I                     | LTNQA---                    | KTHGR                       | 1569         |        |      |
| Query_10007 | 1531 | DKPAQ--ILGAILS-----KT--KTK--NQMSQNFYAMFQSTINLNYLMKEAKYFIP-E                         | LVNYA---                    | SKESS                       | 1587         |        |      |
| Query_10008 | 1481 | SAVDV--LIKLLMNTESVR[1]-----AECTS1CS2TKGELLIANFSDEIALILCTNAELFLK-H                   | LKEAS---                    | RCQPD                       | 1544         |        |      |
| Query_10009 | 1613 | VLTkStTTTTTSSSTTD[1]--QLEEEERQKQKQIEHQSNFYKTYHSELIEYISKNFESFSP--[1]                 | FIDRIv---                   | QTNHI                       | 1683         |        |      |
| Query_10010 | 1574 | KYNGA-----INQWLLS[2]--IGFPSDNSTFYQNGTICYQCFSSVINEHMSRNFREPAK--[1]                   | FPDNIndf                    | TRDQM                       | 1640         |        |      |
| Query_10011 | 1514 | VNATF-LVNLIMDEKSVG[1]-----STNkKLTSGEVFYMNFRTIVHQVKKFYKDCDLR--[1]                    | ILEAA---                    | AEQQA                       | 1575         |        |      |
| Query_10012 | 1486 | KEVTT-VICCIKE---Q ASIQNPATHSS--VLHGDYFVFTFRSAILLEHMLACPEHVS-C                       | LIKDI---                    | SANNV                       | 1548         |        |      |
| Query_10013 | 1489 | VPKQ--LLAMLRDDTPTP[6]STMLASASATQTTFRGALFYDTRVYRVLAPYIARHFVKVFAE-Q                   | LLPHV---                    | GDGR                        | 1563         |        |      |
| Query_10014 | 1517 | ---RN-FLTKIL-----QNYLEEQSAN--VTLSYFRAEIFTQCLNFYSDI-----LD-F                         | LFSKL---                    | SSKFS                       | 1568         |        |      |
| Query_10015 | 1504 | PKVKH--HLLSWAT---N SDTVSGTSGQE--VEKGSVLSILGPKLIPQFLESPPDALS-R                       | CVEMI---                    | REGFR                       | 1566         |        |      |
| Query_10016 | 1514 | ISSED--LLKKLLD---E QQLYVSNLTKT--TRRGLIMFSTYQQEISLAFAGINSKHFTS-S                     | LMNNI---                    | NKSKT                       | 1576         |        |      |
| Query_10017 | 1533 | DSVEP--FLLLVLS-----PAQSGAGASF-AAQDGLLTYITYSGLINNKLLHIXMAID-V                        | LLKNA---                    | KTHPQ                       | 1594         |        |      |
| Query_10018 | 1512 | ---E-TIDIFFRYLLDE TKLYGDSN-SA-TATLGMTLYYTFNSNINAFIAKVSNRCLP-M                       | ILLDA---                    | ASKSF                       | 1574         |        |      |
| Query_10019 | 1555 | ---LQFNLYMES--IMEDSDNDP--GSSCGCTFYRIFQTSINGFFIERANIHMA-N                            | ILMKA---                    | ASSPF                       | 1612         |        |      |
| Query_10020 | 1439 | SPQDR1VVVAALQAAAAS[4]TDIFLKSADR-----MYAS1YSDV1HMLPTLAVWKRA-S[1]                     | LVLSL---                    | LENDF                       | 1506         |        |      |
| Query_10021 | 1580 | ALLQP-LVTLLTETH-----SAGLDDLNSYKPCLTAYFSAQCSSLITL[4]                                 | LLKAA                       | tapATAAA                    | 1638         |        |      |
| Query_10022 | 1493 | IPNET-----LCEWLTTK[1]-----LLYQKSSDLLSYIAENWNHFKL-N[3]                               | YLIK---                     | AKDEP                       | 1543         |        |      |
| Query_10001 | 1587 | T LSSVILGIAESVSDRPLRKS HG KMVS---RAIVSQWSSLSV--WWSEstASLDTKMVAITLLTKLMQIDST         | 1654                        |                             |              |        |      |
| Query_10002 | 1624 | V VSSVILNGLLDYLTSSREVRRTHG MSVH---SAITQWDILMG--GLKKG-CSTDLQSFALLMLRKLQIDAK          | 1690                        |                             |              |        |      |
| Query_10003 | 1618 | W VGSILHGLLDHLAKDKTLRKKEG AALC---DSLQSWPKLAP--WWEAG-ALQDSKSTALTLLRKLIIIDSQ          | 1684                        |                             |              |        |      |
| Query_10004 | 1592 | M VSAVILNGLMDQSFREANRKHQG LKLA---TTLIQHWKCKDS--WWAKD-SPLETKMVAIALLAKILQIDSS         | 1658                        |                             |              |        |      |
| Query_10005 | 1599 | M VSTVILNGLMDQSFDRDHTVRKTQG VLVV---SAVLTNWRTRLES--WVSEN-SAESKMAVLTLLSKVLQIDSS       | 1665                        |                             |              |        |      |
| Query_10006 | 1570 | K VNSILGATVDYIARDRTLRRKKEG PNVA---STILSEWKKFST--WWTNN-APPELQNLASLLTKVLLIDSR         | 1636                        |                             |              |        |      |
| Query_10007 | 1588 | V VSSVLSLLEQISDRDQLRGGEG KTVV---DVVLSQWSQLQLqgWWAPD-SPQEVKMSALNLLRKMMLINGK          | 1656                        |                             |              |        |      |
| Query_10008 | 1545 | V VGRALPHTVSVVVHSSDLRKKYG[4]LQILqifGQELLYWADVVS---NET-----LKMLWLKMLKLIIDSK          | 1613                        |                             |              |        |      |
| Query_10009 | 1684 | D[1]ILNDICIKYQTIQFNNTDKQSK[4]KSMI-----IPFLIKISSh--LLKDVGKTTDKENIIEFTKLNLIIDTP[3]    | 1756                        |                             |              |        |      |
| Query_10010 | 1641 | N[3]IKDLILNLDYLSIKKDTQQSVE[2]IHLNs-ePYFLKSPVKICTy---D-----RHYLLKLNGLFMLEPN          | 1706                        |                             |              |        |      |
| Query_10011 | 1576 | A[2]---LLIALLDSYLPSEMGA SIT[1]SSFM--QEFLOHIEVLAP1--CRAG-SSLTLRFLFDILHKLMLDTPG[4]    | 1646                        |                             |              |        |      |
| Query_10012 | 1549 | Q[1]VISTVTEILQYAKIRKSKHQDS TTLCaferSIVNHWNKLSF---VEG--NSEQVQLLGLVNLARIMPQ           | 1617                        |                             |              |        |      |
| Query_10013 | 1564 | Y -RLVHDAARALVTGDTEMRRYAD -EFF---TAFIDGFLHVRT--WINSAGAGSETHVQGMRLVSAVVRCGVR         | 1629                        |                             |              |        |      |
| Query_10014 | 1569 | K ILQFLNFAVTEIAMDKHLRKTNG QKLI---LKVFESEWPKFEP--YW--S-FESQFKILMISLLTKLMIESP         | 1633                        |                             |              |        |      |
| Query_10015 | 1567 | L[1]AMGFASALFTCLIRNADIRKKYS KVVV---QSFLKHWPTLAAq---AGK--TSLHQDSVLSLSSLF-LIDR        | 1631                        |                             |              |        |      |
| Query_10016 | 1577 | T VLKILVGLIDSIGKVKFRYRYG KDII---NSIMCQWSRLQQ--CLEES-CDIDLQNDIITLTKMFLIDSS           | 1643                        |                             |              |        |      |
| Query_10017 | 1595 | Q VSVILNLLLEVYQKDFKINNNN[5]ETLC---TELISHWQDLSL--WWEDG--SKDLKSAAVTLQKTIALKPK         | 1665                        |                             |              |        |      |
| Query_10018 | 1575 | M ISGILSGLLDFILDRGLRQSKG IHIS---KKILSSWNSLKC--WWLTP-DAQDQLQISVNIILNCLTLDPQ          | 1641                        |                             |              |        |      |
| Query_10019 | 1613 | L VLSLLNGLLDQVIRDKILRTRNG SSFV---AVLNNWTSFEI--FWRTH-SAMDLRHSILMILKMLILDP            | 1679                        |                             |              |        |      |
| Query_10020 | 1507 | V VNVLIDILRQVACSKVYLRKSAE[5]ATLvaavKQYLNKLETVKRe-----TQPALSLQILKHFVLELSON[4]        | 1579                        |                             |              |        |      |
| Query_10021 | 1639 | T[6]LAAIIBSLAASVKRTALS KQCCA[4]KQLA---SQILAKWTLVQQ1--WDYG--NDDCRFSVLGILLTNLAVDAE[3] | 1717                        |                             |              |        |      |
| Query_10022 | 1544 | S LYAVFIPILKLS-----QKTPN[2]KILL---RSVPENWNEQERtdFTEFE--VATSKVKIYTFIANACQVQLR[2]     | 1610                        |                             |              |        |      |

Supplementary Figure 5: COBALT analysis DNA-PKcs from representative examples from all major phyla (short list)

|             |      |                                             |                                          |      |
|-------------|------|---------------------------------------------|------------------------------------------|------|
| Query_10001 | 1655 | VIIDVKNKSFYY--VFKMFLGLISDKNNTLQFKTRVLDL     | LIFFCNLPA-EE-NKQLESCLNQFVADCFPMSSLEFHA   | 1727 |
| Query_10002 | 1691 | FVSDTTHPVFSS--VLEAYSFMLTDASTSLTFKAQVMDV     | LFFFVSLPD-GE-QTKLRSALDRLVADNFPNLSSEFRV   | 1763 |
| Query_10003 | 1685 | VSRDPAPAFQFP--VFTMYLDMLTDSRSTLPPFKSQVLDL    | LFFFVTLVQ-TQ-LAELKARLDRMVDNFPNLSAEFPA    | 1757 |
| Query_10004 | 1659 | VSFNTSHGSPFE--VFTTYISLLADTKLDLHLKQAVTL      | LFFFVTLVQ-TQ-LAELKARLDRMVDNFPNLSAEFPA    | 1731 |
| Query_10005 | 1666 | VSFSSNHEAFAM--VFHTYTTILTDSTLALNLKSKQAMII    | LFFFVTLVQ-TQ-LAELKARLDRMVDNFPNLSAEFPA    | 1738 |
| Query_10006 | 1637 | VTSHTSHSPFST--IFEMYQTMVLDNKTNLAFKFKVLDL     | LFFFVTLVQ-TQ-LAELKARLDRMVDNFPNLSAEFPA    | 1709 |
| Query_10007 | 1657 | VVSDPTHSPFSC--VFSMYQSMVTDKSSLLTFKCKVLDL     | LFFFVTLVQ-TQ-LAELKARLDRMVDNFPNLSAEFPA    | 1729 |
| Query_10008 | 1614 | I---TEWPEFAP--MASAYFMLNDQSLTLDPFKNRMLSL     | LFFFVTLVQ-TQ-LAELKARLDRMVDNFPNLSAEFPA    | 1682 |
| Query_10009 | 1757 | ----ETKEGYDF--VYQLLINYL--NRSSMLNPFKQAVTL    | LFFFVTLVQ-TQ-LAELKARLDRMVDNFPNLSAEFPA    | 1825 |
| Query_10010 | 1707 | LLRRFSLLEEFQN--LFRENYEAFLDKQIDLEFKNEALDL    | LFFFVTLVQ-TQ-LAELKARLDRMVDNFPNLSAEFPA    | 1778 |
| Query_10011 | 1647 | LNKYSFDFITetFLSFLSCSSEDATNSRLGSSAAFTL[7]    | LFFFVTLVQ-TQ-LAELKARLDRMVDNFPNLSAEFPA    | 1730 |
| Query_10012 | 1618 | PDRGLARCEA----LQKWVITQLTSRDLQHLHYKSRALDL    | LFFFVTLVQ-TQ-LAELKARLDRMVDNFPNLSAEFPA    | 1688 |
| Query_10013 | 1630 | PETAQRHANFEQ--VLEVYKRFLEDRVDMTSKRVALQL      | LFFFVTLVQ-TQ-LAELKARLDRMVDNFPNLSAEFPA    | 1702 |
| Query_10014 | 1634 | QPK-----NEK--VFQMYFEFLTDEKSMNPFKAKVLDL      | LFFFVTLVQ-TQ-LAELKARLDRMVDNFPNLSAEFPA    | 1694 |
| Query_10015 | 1632 | BGTIKSHCTSSRSdMVVFNGLLADAKVELQAKIKVLLK      | LFFFVTLVQ-TQ-LAELKARLDRMVDNFPNLSAEFPA    | 1706 |
| Query_10016 | 1644 | FIKGNVNYDSNS--IFFSFITLLQKSEMSLEFKICVLDL     | LFFFVTLVQ-TQ-LAELKARLDRMVDNFPNLSAEFPA    | 1714 |
| Query_10017 | 1666 | LLLKSADVSKPL--V--DMYTAMIGDEKLELNFKAVMIDL    | LFFFVTLVQ-TQ-LAELKARLDRMVDNFPNLSAEFPA    | 1738 |
| Query_10018 | 1642 | FATQSNDSSEFET--VFNFFLSLLSGTSTSLAFKVVLDL     | LFFFVTLVQ-TQ-LAELKARLDRMVDNFPNLSAEFPA    | 1714 |
| Query_10019 | 1680 | KVTDENRFTFSS--LFEMYLKDKKSTTLAFKQGVLEL       | LFFFVTLVQ-TQ-LAELKARLDRMVDNFPNLSAEFPA    | 1752 |
| Query_10020 | 1580 | YVEALRLGPILD--IQNACSLLLKQRCGSYLVKADLLQI[5]  | LFFFVTLVQ-TQ-LAELKARLDRMVDNFPNLSAEFPA    | 1658 |
| Query_10021 | 1718 | -----SndqVFVLFVGVV--NSRVNFDLIVNGLAL         | LFFFVTLVQ-TQ-LAELKARLDRMVDNFPNLSAEFPA    | 1782 |
| Query_10022 | 1611 | ---SNHYAIKFIh-LCEKVSXYLKER--YPVHIKREVLNL[6] | LFFFVTLVQ-TQ-LAELKARLDRMVDNFPNLSAEFPA    | 1687 |
| Query_10001 | 1728 | -GSQQQKCYITALDRLLLAMELSGSLMLLNLIIISVICBEVK  | HTHENAIQSAFQRFIKRLLPKD--KHKLALDVPYKIFSQ  | 1803 |
| Query_10002 | 1764 | -GSPKYIDYAGALNKILTAMVLSGNLMLLEIIVISIMCRDEK  | HAYEDEIQESLAAFIKRLPEE--KQTAAGVAVYQIFCQ   | 1839 |
| Query_10003 | 1758 | -GSSKYNDYVGAATKLLSALELSSMLLELLISVMCREAK     | HVMEDDIQTSLSRFIKGMGAD--RQKPAIDIPYGIFFR   | 1833 |
| Query_10004 | 1732 | -GTPRFNNYVDCMKKFLDALELSQSPMLLEMTVEVLCREQQ   | HVMEELFQSSFRRIARRGSCV--TQVGLLESVYEMFRK   | 1807 |
| Query_10005 | 1739 | -GTLKYNVYDAIKKLLDALELSQSPMLLKMALTLICRDRS    | HVMEEGFQVCFQRLAKTGSCV--KQVALLAEVYGMFEN   | 1814 |
| Query_10006 | 1710 | -GSPRYQDYISAINKILLALELSGCSMLLELLISIMCREKN   | HVYEDIEQDVIARYTKRLVIY--KQKALADIPYKIFTS   | 1785 |
| Query_10007 | 1730 | -GSPKYQEVYIAMSLLSALELSGSLMLLELLISIMCREKN    | HVYEDRMQESLVTFIRRLPTG--HQKAAALDVPVPIFTK  | 1805 |
| Query_10008 | 1683 | -GTAKYDQHVAAQCILFAFGCTGSPILLELLISVMCREQS    | HPIASDLKHQKQFSSRANSAV--LENILELLDKMFFN    | 1758 |
| Query_10009 | 1826 | -GSPYINEYITTIERFLNTEITCNPMIIDLTLQVL-KEQD    | HSHITHINQSIERFIVRTNDSg--AKEVFSHCAMPMS    | 1900 |
| Query_10010 | 1779 | fGTKKLENYLSVLDKMFAMVRSVSLFKILIPPTFCRES      | DMYGEFQRFQVSEFLSKLSRS--KYVDTMDIAYGYFTN   | 1855 |
| Query_10011 | 1731 | -GSTQRSNYQTLNQLLAAVSVSHSLELLELVIPVQPNK      | ---ISSRAVSEAVEVFAESLEDNc---EAAFNLCLTMDM  | 1804 |
| Query_10012 | 1689 | -GSVGYSGFVNAFRKILRGLBESGCVILLVSVVMAAESQ     | HVLEDDIQKSLQIFIKRLEDD--QVQKAEAVPKVFDV    | 1764 |
| Query_10013 | 1703 | -DSTQHREYIAALDDILDALVLSGSELELLEVVTVHQREDR   | tHVHEDHIQRKLRDFIVQEHDTa---PQAIELMFPQIVLA | 1778 |
| Query_10014 | 1695 | -SDDIYKDYLVNVHKLVCLELSQNLDMLSLLIGVCREKE     | HLCEENQFRESLERFIKRLSSE--KQMEIVKQNWSNFQS  | 1770 |
| Query_10015 | 1707 | -GGARDREYHQAICEILLTALELSLSPILLQFVNVNFCREDK  | HRYEVMHESLEKFMKLLPLL--KQOETLKHIDMYND     | 1782 |
| Query_10016 | 1715 | -GSSQYNDYHLAFTKLLIALELTGNEMLLKVIFPLVQPNK    | ---LLEENIQKCLKKCRKRTDSN--KERLIAEVPKMPLE  | 1790 |
| Query_10017 | 1739 | -GGPLLENYTNIIEKLCNSLVASGSLVLELLIINIMCREVR   | HVCEEKIQTSLHQFISKLSSEd---VDALKEVYEMFKN   | 1813 |
| Query_10018 | 1715 | -GSPDYNDYVACIDKLLANLIKSGNMLLELLISVMCREKK    | HAYEYEQIKSLLFISSLIPK--DALGALDVPVKMFDV    | 1790 |
| Query_10019 | 1753 | -GGPQYNDYVQTDKLLAAFNRSRLLLEVLVIAIFCERERQ    | HVHEDQIQSFIAFIQRLHPEpdQAAMDVCLSIFFN      | 1830 |
| Query_10020 | 1659 | -GSRDFDVHMLFTVVLHVVEQKSIAYLKVYIPSLKEAES     | HLFRVEIKQMLARFSLSSGvLNGSVASSEMIRQRM      | 1736 |
| Query_10021 | 1783 | INSHAYCQYVRAFRLGLLAQETSSEHPLLLEKSLIDVCREK   | HALAEAFQCCNRLRLRIPIQ--RCRDFVTPWVRLFRG    | 1859 |
| Query_10022 | 1688 | NSNVYNNFHIIIEGFLSLLLSKLNKLVLRMIYNSMRWKT     | ---TYEPLSKRTKIIEIQSINKm---PLHQFKQTFQFMD  | 1763 |
| Query_10001 | 1804 | -E---G RFTNNOARRACEKVSLSLMLRVHSSALTEFYC     | EHIKEIMKIE-AKPTKAPHAPE--AQLTSKIGCF       | 1870 |
| Query_10002 | 1840 | -E---N SFSKEIRRAAIEVRCIPLMLRAGVKALSSFFK     | ECIKNIGGIIID-AKTIKAPETVFQ--NQLVSKTCCF    | 1906 |
| Query_10003 | 1834 | -E---G SFPNEIRRSALERVCLPMLRLVHSPALTEFFFT    | DHIREIMDIIIG-APQTKAGEASLR--TQITNKLCCF    | 1900 |
| Query_10004 | 1808 | -D---D PRLSFTQRSFVDRSLTLLWHCSLDALREFFS      | TIVVDAIDVLK-SRFTKLNSTFD--TQITKMGYY       | 1874 |
| Query_10005 | 1815 | -E---G GLSNIARQSVMDRSLTLTIHCSLDALKEFFIS     | KIIKDAMGILQ-SRFTKTSSEFFD--NQLTRKIGCY     | 1881 |
| Query_10006 | 1786 | -S---G SYPSAIRIAALSRCVCLPMLRLVHKSAVIEFFL    | THISFIMSEIE-AKLVKGSKAELE--NQLTKIGCF      | 1852 |
| Query_10007 | 1806 | -E---G LFPNEIRRSLSRVCLPMLRLVHKSQSLSEFFV     | DHIKFTDTLS-AKLSKSSSEIE--RLTLKLCFF        | 1872 |
| Query_10008 | 1759 | pS---G CVCASLRLLALNEFFIPFLHSKNDLLLTWTC      | RKIQTLSVCLT-ESLTLIEQTDCE--QQLITKIGCY     | 1826 |
| Query_10009 | 1901 | nd--- YQDELKITLIDKFCVPLIGHMKQVLIQIFA        | QHLSSLMSIIQ-PLAPKYLATAIErkSSVVEKICCF     | 1968 |
| Query_10010 | 1856 | -StyvS ----FORIIEMILSPPLLQGPRIKVFMDFFK      | KHINEIIDLLE-RDKYTRNVEKII--YILNERAGSL     | 1920 |
| Query_10011 | 1805 | ----rG[1]--SYELRRAVVEVIFPAFVNSSSMEFVTVWYS   | QHISDLFYVLKqSSSMLSABREFE--DLFKKICHY      | 1870 |
| Query_10012 | 1765 | -D---Q YDPSVRLGCAQRFVRLPLQGCRRSAAREFFR      | HCIQDLQGMNLN-VTLDCRQQLQTE--HQLVGRIGAW    | 1830 |
| Query_10013 | 1779 | -E---T N-PLFVRRGVAQRVLAFLQKASLKITKDFYI      | KRLPAM-SLM-SQDTPLTSTP----AIVIKMCTF       | 1840 |
| Query_10014 | 1771 | -S---D ---DERKFLLEKVFIFLKNCKDPVIFDFMS       | ANIVSLIEVLN-WNL---NEPAFE--MMCLNKKCVF     | 1831 |
| Query_10015 | 1783 | -P---T CIKQNLRYNIMDLVLTPLLQKAEAVPTQNFLL     | TVISAVMAGMS-APVHGRSDEQHK--TLVT-KVGSF     | 1848 |
| Query_10016 | 1791 | -D---E LYPSDMRIHIEKVFVILGMISKITLKYFFI       | DHIKEIMQIVK-SKR---KSSN-E--IQLVSKIGAF     | 1853 |
| Query_10017 | 1814 | -D---K DFPVAAVKGIGERLVCPLTECCSALLLEFFV      | LKISDVMCIME-AKLARVTPKLE--CQLVHKSCEF      | 1880 |
| Query_10018 | 1791 | -D---K SYRPDIRRAAIEVRCVCLPMLRLVHKSQSLSEFFV  | SHIKEIMDIE-TKLVT--ADLE--NQLISKLGYS       | 1855 |
| Query_10019 | 1831 | -E---R DYQTHSRRAVIERICITPFLLSSTARRAFYQ      | DQIQKLSVLE-AKELKPTDPNFE--SQVTSKLCFF      | 1897 |
| Query_10020 | 1737 | -E1ldL[4]NVDVAIRKILLEEVFPFVEQCTGEILLHFYM[4] | KRKSTIISLLA-TLISASAEAFGE--ESRIGTVVAF     | 1814 |
| Query_10021 | 1860 | -DsggG GFTGFHREQVSRVLAPELLTQCHGSVLLDFVA[2]  | DCLEYCLTCLLNAQQSLAGFNESEteEILLARGCC      | 1934 |
| Query_10022 | 1764 | -Bfmr[4]SVDDNLRWAIMKKIILKILESCSQEFLADIMI    | EFTPQLEIVLK-ESIFLQKDPLEQ--YQLIKQKWI      | 1837 |

Supplementary Figure 5: COBALT analysis DNA-PKcs from representative examples from all major phyla (short list)

|             |      |                                                                                        |               |           |          |           |          |                     |                          |                       |                |      |
|-------------|------|----------------------------------------------------------------------------------------|---------------|-----------|----------|-----------|----------|---------------------|--------------------------|-----------------------|----------------|------|
| Query_10001 | 1871 | ELL-EVMYSRLPNTD VNSKD-SSINKSFCS---PKIPDtGKE-MNLTITKVS NATKGE                           | NMNGE         | TLLIP     | LRR      | 1935      |          |                     |                          |                       |                |      |
| Query_10002 | 1907 | QLV-ELMYSRLVKEDLF SMD-SAINKAYTM---D-VKT-GKE-MTQALTKACHAAKSE                            | DIRGE         | TNALE     | LRR      | 1969      |          |                     |                          |                       |                |      |
| Query_10003 | 1901 | QLL-ETMYSRLPKKEVNTPT-SRIVRAYKG---EEVKA-GNE-MTTAITKFGHAAKSE                             | DLRGE         | TGLLD     | LRR      | 1964      |          |                     |                          |                       |                |      |
| Query_10004 | 1875 | KIL-DMVYSRLPKDDVHAKE-SKINQVFGH---SCITE-GNE-LTKKTLIKLCYDAFTE                            | NMAGE         | NQLE      | RRR      | 1938      |          |                     |                          |                       |                |      |
| Query_10005 | 1882 | KLL-EVYIIRLPKDDIYSED-SKINRAFHS---SSNME-GNKLSKSLKLCYDAFTE                               | NMTGE         | KQLE      | KRR      | 1946      |          |                     |                          |                       |                |      |
| Query_10006 | 1853 | QLM-ELLYSRLTKDEVNSKN-SVINEKYCQ---TKVET-GKE-MTQKATKAHEARSE                              | DTRGE         | TELVE     | LRR      | 1916      |          |                     |                          |                       |                |      |
| Query_10007 | 1873 | ELV-EVYSSFPKKEVNSKN-SKINLKYCG---GKVEY-GKE-MTTAVTKAAHEAKKE                              | DVRGE         | KRLPE     | LRR      | 1936      |          |                     |                          |                       |                |      |
| Query_10008 | 1827 | KIC-AI IYNELDLECL---K-NEVNVSYLG---SDSQM-KNE-LIKKLVSCAVGAKKE                            | -FCRD         | SKLDS [3] | HFF      | 1889      |          |                     |                          |                       |                |      |
| Query_10009 | 1969 | KLT-QQFYESLPATVIRDQV---NPFYTG---DKHADAGTE-LTAAIMKAAHLAKSE                              | KLATD         | EQHVT [2] | LAT      | 2029      |          |                     |                          |                       |                |      |
| Query_10010 | 1921 | TLL-QILYLRLASEEDVYSEK-GEIVKAYCQ---SRPLK-AKE-LTRKVMKAAHKIKSR [3]                        | DDNGN         | KLVSE     | ANL      | 1987      |          |                     |                          |                       |                |      |
| Query_10011 | 1871 | ELL-ELLYSK--ADNV SITK--TIAPVFTS-----SD-----LMRQAGDTCHG                                 | KLDPE         | YKLYP [4] | TWR      | 1925      |          |                     |                          |                       |                |      |
| Query_10012 | 1831 | NIL-EPLFVHLESSELESKE-CVITAAAPP---GAVKT-GKE-LISDLTSRAYKYRSE [4]                         | NLTGN         | VQLVE     | LFR      | 1898      |          |                     |                          |                       |                |      |
| Query_10013 | 1841 | TLI-DILFQRLNNTDLYGKS-AVINNKTYCE---AAGEPVNDK--GSNLTNTCRALRD                             | TVTGE         | ESLVE     | LRR      | 1904      |          |                     |                          |                       |                |      |
| Query_10014 | 1832 | QLI-ELAYKRLLHKDEIFFTN-AKICMAYETIKFGCVKD-GKE-LTKEVLRKSRKHMNE [4]                        | NTGQE         | SAKIE [4] | LRR      | 1906      |          |                     |                          |                       |                |      |
| Query_10015 | 1849 | MIL-QIMYSKLPREKLFPAG-SEINAAFRP---GDQ-S-GKE-LTKEIFRYAAKISKG                             | ELRHD         | QTHAE     | LRR      | 1911      |          |                     |                          |                       |                |      |
| Query_10016 | 1854 | QLI-EILYTYLSKEEVS-KE-SQINCSY-----GKE-LTREATGFAIARKE                                    | NLEGE         | SISKE     | FCR      | 1909      |          |                     |                          |                       |                |      |
| Query_10017 | 1881 | QFI-EILYTRLPSLLISSME-STVNTAYCN---GSPQT-GKE-LTQAITKCHGAKSE                              | DLHGD         | RTHYE     | TRR      | 1944      |          |                     |                          |                       |                |      |
| Query_10018 | 1856 | KLM-KLMYSKLSKQDVNTAE-SSIVKAYTG---RPTED-GKE-ITKSIKAAHACKSD                              | DLRGE         | TRSV E    | LHR      | 1919      |          |                     |                          |                       |                |      |
| Query_10019 | 1898 | KLV-EILYSQFSKSELNMLE-STINKAYVG---GDVKT-GKE-LTLAITKAARAASIE                             | DMRGE         | TVALE     | LRR      | 1961      |          |                     |                          |                       |                |      |
| Query_10020 | 1815 | SLV-EILYRLVDPDIIR---SKINSAFLG---HSGGK-GRE-LTMLVCKCAKVVVTK                              | ---IY         | LEADD     | LVR      | 1872      |          |                     |                          |                       |                |      |
| Query_10021 | 1935 | RVL-SCFYMACGLTELALPRLCDAPKRFYSrqpAAQKpDRS-LSNWSVQCYDLVTO                               | ---SF         | PRCRE     | SAR      | 2000      |          |                     |                          |                       |                |      |
| Query_10022 | 1838 | FLVFEVFRRLKPETIR---QQVHKLYG---ESSpGNE-LTKSLIQLCTLAKKA [6]                              | NFVKD [9]     | NSPLQ     | VQR      | 1913      |          |                     |                          |                       |                |      |
| Query_10001 | 1936 | ALHCAAYNTLIAALICTQEKKFFYAFLEF TENPAKNQLHWNN-IVDQDVVYEFPLEMENPIERRK-KFVSIRTSVRD---      |               |           |          | 2010      |          |                     |                          |                       |                |      |
| Query_10002 | 1970 | QFHCAAFNALIAIISCTQTDIKFYNAFLFSENTAKGQFLLDN-IIDITKNYSFEIEMNAPMERKK-RFVSIRNQIQDtvA       |               |           |          | 2047      |          |                     |                          |                       |                |      |
| Query_10003 | 1965 | EFHCAAYNALIAIISCTQTDIMKFFYAFLEFQENTAKGQFLLDN-LVDTNKLYQFDEAFSAPVSRKK-QFVSIRQELRG--Q     |               |           |          | 2040      |          |                     |                          |                       |                |      |
| Query_10004 | 1939 | LYHCAAYNCIAISVICVFNELKFFYQGFLESEKPEKNLLIFBN-LIDLKRRYNFPVEVEVPMERKK-KYIEIRKEARE--A      |               |           |          | 2014      |          |                     |                          |                       |                |      |
| Query_10005 | 1947 | QYHCAAYNCIMAVVTCIFTEAKFFYQGFLESEKAEKNIFIFEN-LIEAHRTYNFPVEIEVPLEKKR-RFISIRKEARE--A      |               |           |          | 2022      |          |                     |                          |                       |                |      |
| Query_10006 | 1917 | QYHCTAYNLMISIICTQTEAKFFYNCLFSEKPSGQFLLDN-ILDCEKMFEPKAE LDSPLERKK-RFVSIRNEVKE--T        |               |           |          | 1992      |          |                     |                          |                       |                |      |
| Query_10007 | 1937 | QYHCAAYNALMAIITCTQTEMKFFYGLLFEKDLKAGDFLLDN-IVDQNRKYLFEIETSLPQRKK-RFVSIRSEAGA--Q        |               |           |          | 2012      |          |                     |                          |                       |                |      |
| Query_10008 | 1890 | EYRCAAYNCVIALVKKTSQSHLKHGEGFIFND-----CWES-IIDKEVKEYFDREIQEBEQSAG-KMYYSRQDRFS--S        |               |           |          | 1958      |          |                     |                          |                       |                |      |
| Query_10009 | 2033 | KYHGAAYSALASVVAATTQTKETFFHVFVFFKENKEKNEYLWEN-IIDLEQQYNF-----EPE-TNFQISSQLSSa-v         |               |           |          | 2100      |          |                     |                          |                       |                |      |
| Query_10010 | 1988 | HFRCEAYNALAAVILCTQNNPVFYKAFLEAENTSKGELLWEN-IIDLEIHYKIKIELNQPFPRTK--VDDFRSRSGK--T       |               |           |          | 2062      |          |                     |                          |                       |                |      |
| Query_10011 | 1926 | ELHAAAYNCIAAVILCTQIDEKWFNAFLFSEKSRP---LWQH-LVDLTKVYDDMSVETSQSSIIStVKGMRADLKArrT        |               |           |          | 2001      |          |                     |                          |                       |                |      |
| Query_10012 | 1899 | QSQAAYNFALVAIISNVKCELRFFTLGLFSEKAK-EVWPWGK-LVNCNKYALALDWEIEPARRK-QLVSIRQCARAq-r        |               |           |          | 1974      |          |                     |                          |                       |                |      |
| Query_10013 | 1905 | QASCAAYNALTTVICKTQTEKFFYAFCFKEATGKVRDCVFN-LIDEKRYTYTTELPAAMSVRS-KCVLALREGEA--T         |               |           |          | 1980      |          |                     |                          |                       |                |      |
| Query_10014 | 1907 | ILHCSAYNCLISLFI RTQTEPKLYLAFLEFKDDPSKNEFVFEP-LIDKIKSYNFCVEMENFTQRKT-KFISIRDEFKV--I     |               |           |          | 1982      |          |                     |                          |                       |                |      |
| Query_10015 | 1912 | LCACAAYNAI IAVLACVQNDLRFYTNFLF SANPTKGEVIWEC-LVDCSRNFEPDVEINFKPASKK-RFVAVRQKLREt-A     |               |           |          | 1988      |          |                     |                          |                       |                |      |
| Query_10016 | 1910 | KYCCAAYNAVIAIICCTQDSKFFYTFLEFNFAKGEVIWEN-IIDLNKEYTFPIELDT-IERRR-KFISVIRHENRE--L        |               |           |          | 1984      |          |                     |                          |                       |                |      |
| Query_10017 | 1945 | QYHCHAYNTLMSVISCTQSKPQFFVGLFKEDVVKQQLLDN-IIDCEKYEFPQVDFEAPLKRKQ-QITSIRDDLKQ--S         |               |           |          | 2020      |          |                     |                          |                       |                |      |
| Query_10018 | 1920 | QCCCAAYNALISVISSTQTEMKFFYVFLF TENVARRKQFLWEN-LIDMERYAFIEI ELSYQDKQKT-TFRSLREQSRS--S    |               |           |          | 1995      |          |                     |                          |                       |                |      |
| Query_10019 | 1962 | QFHCAAYNALVALICTQTDLKFYVAFLESENPIKQQLLDN-LVDCNRITYTFEVELSAPLERKK-QF---RMQARI--P        |               |           |          | 2034      |          |                     |                          |                       |                |      |
| Query_10020 | 1873 | LACCAAYNLLAAISQTOQEKLYDQILFQSA-----LWSN-LVDSALEYELR-----AETE-NFVTIPLSSLSL--t           |               |           |          | 1935      |          |                     |                          |                       |                |      |
| Query_10021 | 2001 | QMQCEAYNLLVHCIIKAASDKERSYLP-PFTEANAARKKFI FDN-IVP TDVDVYQLPLQVEQSASRRKQ-YLVSVRPAASS--A |               |           |          | 2075      |          |                     |                          |                       |                |      |
| Query_10022 | 1914 | QYACAAYTCLTAIIMGTQKENLFSQFLFATLRDKGEECFWNvLIDQEKAYNF--EVETNFNYIQIKQIEFFKLEQAN--G       |               |           |          | 1989      |          |                     |                          |                       |                |      |
| Query_10001 | 2011 | --VDPS---DEPTGPA                                                                       | SSV           | H---      | YLASQYL  | AGSSSLTDV | SQDFD    | --GSSMV             | ----                     | SSADSSFDNQRSRES       | 2066           |      |
| Query_10002 | 2048 | GSSSQ---QSDSGIE                                                                        | MSG           | Ytgr      | YLSTQYL  | ANSSLE    | DIQQDFD  | --SGGVQ [2]         | NASIDKDQSL               | QRSVPHIK              | 2114           |      |
| Query_10003 | 2041 | DSPEA---GSSR---                                                                        | ---           | ---       | YMQSYL   | AGSSLE    | DISQDFD  | --TSGTQ [5]         | TFSSSTQERY               | SASQSSRLQ             | 2099           |      |
| Query_10004 | 2015 | ANGDS-----                                                                             | --D           | Gpsy      | MSSLYL   | ADSTLE    | EMSQDFD  | --STGVQ             | SYSYSQ---                | DPRPATGRFR            | 2067           |      |
| Query_10005 | 2023 | GDGDS-----                                                                             | --G           | Epy       | LSSQSY   | MADSSLE   | EMSQDFD  | --STGVQ             | SFSYNSQ---               | DPRGHAVRSR            | 2075           |      |
| Query_10006 | 1993 | RQGE---EESL--F                                                                         | SS-           | Y---      | NISTQNI  | ESSL      | DDLNQYDF | --NSGTA             | -----                    | QVFFSDIFSDLTSS        | 2045           |      |
| Query_10007 | 2013 | GDGNS-----                                                                             | QDSA--E       | SSV       | H---     | YLASQYL   | ADSSLE   | EDVSAYDY            | --SGSLQ                  | -----                 | GERSEPVPPRTRQR | 2066 |
| Query_10008 | 1959 | AEYEN-----                                                                             | ---           | ---       | QVELSVLL | DSSLSV    | MATQDFD  | --TESLE             | -----                    | ARTHCAETR             | 1998           |      |
| Query_10009 | 2101 | ANSQ-----                                                                              | RDLK          | ---       | YLLSSQYL | QDSSLSQSL | ---      | DVG--               | TSSS                     | -----                 | TTSTSTTTTSNNNL | 2147 |
| Query_10010 | 2063 | FKEAIv-----                                                                            | SNNLK         | ---       | ---      | YLASQYL   | ADSSVT   | QGGALFKelp          | --DES [1]                | GESKNEHSDTIPMEIDERVE  | 2120           |      |
| Query_10011 | 2002 | RGKGS1---                                                                              | SQTAST        | ---       | ---      | ISSQYMH   | SASLSQ   | EPAVIRTF            | -VGGIR [4]               | SAAGVAGLLLEDDEESPSTET | 2063           |      |
| Query_10012 | 1975 | RETLG---                                                                               | fASQSVRY      | IPS       | A-----   | SQYLF     | DSTLNE   | DTLDFD              | --STSVV                  | -----                 | STEARPGHDE     | 2024 |
| Query_10013 | 1981 | PSTTA-----                                                                             | A             | ATA       | Aarr     | YLPQYL    | ADSSLD   | QDAQLEA1-RQGAD [5]  | AVEDASSSSSSPPSDGPTF [5]  |                       | 2050           |      |
| Query_10014 | 1983 | KADTN---                                                                               | SRSANYI       | STM       | Hts      | SLSL      | QNL      | YSSSLE              | EELSVDFs-VHSSY           | NQAYNSQSSVTRA--PSFRR  | 2046           |      |
| Query_10015 | 1989 | REEGA---v                                                                              | VAGTVQY       | MAS       | H-----   | YLS       | DSSLE    | EDMSQDFD            | --NNSVV                  | -----                 | LAMSQTEKSERVT  | 2040 |
| Query_10016 | 1985 | NSNKTln                                                                                | fASSLKYA      | PSQ       | Y-----   | LSDSSL    | DDVSQDFs | --SSEL              | AFSQDMKNKRKEIDSNPS       |                       | 2043           |      |
| Query_10017 | 2021 | TAAGN---                                                                               | SSGSPSS       | SPS       | Trpr     | YISSQYL   | DSSSLTDV | SQYDF               | --TLF [5]                | GSVGGGASTESSIDEDSGN   | 2088           |      |
| Query_10018 | 1996 | VSSS-----                                                                              | ADEADSG       | IAM       | Apsy     | HSSQYL    | ADSSLE   | ESISQDFDn-SSTVQ     |                          | GYSENNSIKQIPTRTGDS E  | 2061           |      |
| Query_10019 | 2035 | SPKEN---                                                                               | SLEESAG       | RTG       | Lsh      | MYSQYL    | ADSSLE   | DISQCDF             | --SSPIQ                  | VHSGTEA-RQPLYKNESSS   | 2098           |      |
| Query_10020 | 1936 | VSLKQ-----                                                                             | RY            | EVD [7]   | Krnns    | SAALQFY   | TNSSL    | MDAVTLTA-----       | -----                    | STVTEPPDINR           | 1988           |      |
| Query_10021 | 2076 | SDSSA                                                                                  | seaGPTDDL [5] | SSS [8]   | Nslq     | FAASQFL   | ADSSSL   | DDVSQDFRlvTADLS [1] | TSDSASLATASLSLSTSSSF [3] |                       | 2162           |      |
| Query_10022 | 1990 | GDISQ---                                                                               | IKANNL        | INE [5]   | -----    | NSAMV     | FETQPK   | INI-KSEE [5]        | LLNNKKQNTNQDQMLDKSA [1]  |                       | 2053           |      |

Supplementary Figure 5: COBALT analysis DNA-PKcs from representative examples from all major phyla (short list)

|             |      |                |                              |                             |                                |                           |      |
|-------------|------|----------------|------------------------------|-----------------------------|--------------------------------|---------------------------|------|
| Query_10001 | 2067 | SIEVPDVLV      | KEHYI                        | EMEMDALNQHPCCMAALSALLOHMKL  | --NQITPEVEKGSK                 | --PS--SMPDWMKNIHDKIKN     | 2134 |
| Query_10002 | 2115 | KRYSNEETP      | [4]QGBYI                     | EMESDALNQHECMASITAVLKHMQA   | --NKITPEIPEGSK                 | --AS--EMPGWMSLQKKLTS      | 2186 |
| Query_10003 | 2100 | ARQQDSS        | -[3]HGFDFL                   | EIEMDELNQHECMSSMSAVLQHMAR   | --NNITPQVQKGA                  | --PK--DMPWMSCLNKKLGG      | 2169 |
| Query_10004 | 2068 | RREQRD         | --P[2]HDDVL                  | ELEMDELNRHECMAPTALVKHMR     | --SLGPPQGEEDSV                 | --PR--DLPSWMKFLHGKLG      | 2135 |
| Query_10005 | 2076 | RKEQAE         | -LS[2]QSDIM                  | ELEMDELNQHECMAMIALINHMQR    | --NNITPQVEEGKT                 | --PQ--ELPPWMKFLHGKLG      | 2144 |
| Query_10006 | 2046 | SNVQPDQFN      | [1]TVDYI                     | ELELDELNQHECMATMVALIKHLHT   | --VITPVL--KGTI                 | --PK--EMPTWMSYFSEKMTN     | 2112 |
| Query_10007 | 2067 | AVSEEAAPV      | [1]EADYE                     | EIEMDELNQHECMATMALLKHMQR    | --NKITPD--VVS                  | --PL--DVPPWMKFLRDKMNS     | 2133 |
| Query_10008 | 1999 | ----TESAN      | DKDVM[4]                     | KTKLDDLQDHPCCQAMVNVINYM     | DMH---MGMIPEYAGT               | -----PLPAWMSMRDLFNF       | 2062 |
| Query_10009 | 2148 | ----KIVA       | SAMNM                        | PIELDKINSRHECMAPLTKIDIQE    | ----RFRSIDIQS                  | --PN--DMPKWMNLYLKVKN      | 2207 |
| Query_10010 | 2121 | ----NKS        | SKL                          | ----ELEDVFNHPCMKMILRVIDRLHS | ----QLTKPVDPEVSM               | -----PGWMDIYKFTN          | 2175 |
| Query_10011 | 2064 | NIETAQEE       | IIETT                        | ALDRDDFDQHECMPVILRLABHVH    | -----KFGANYQ                   | --PG--VMPDWMKSLHATLDN     | 2126 |
| Query_10012 | 2054 | KTPKESGAE      | -STEV                        | ILESDDLNMHECMATLCGVIBHMVD   | --QGISPDPDAETK                 | --DA--ALPPWMSMRKCLSD      | 2091 |
| Query_10013 | 2051 | ASEDSPGAP      | SNIPV[6]                     | QMEMDELNSHESMVSIMGLIQRIQ    | QavhaESKQRNEDGLiLpSS           | TMPSWMSNLLKSPES           | 2129 |
| Query_10014 | 2047 | SYTDELNS       | QEQS                         | EIEMDELNQHECMADLISLQSLVV    | --NKITPIYDNGQL                 | --PS--EMPPWMTFVHKILD      | 2114 |
| Query_10015 | 2041 | GANEMGGVL      | -M-PV                        | HMDQSDYNGHEVMANLTAVINHMVD   | --AEIMVLHGQD                   | TV--PKatDVPQWMTLVQQKLD    | 2108 |
| Query_10016 | 2044 | NEAKDDDLV      | SNITV                        | ELEIDDLNQHECMNSLTMVQHMEX    | --IQL----LSS                   | --PK--EIPKWLNDLCKKLED     | 2106 |
| Query_10017 | 2089 | SQEASSYV       | SEE--                        | QLEBDDLNIHECMATPLMKLLDHMI   | --NKITPAPSGDSP                 | -----EMPPWMTPLHKRMTD      | 2152 |
| Query_10018 | 2062 | KAKTII         | -N[2]ADE--                   | ELELDDLNKHECMELALLTLDHMAV   | --NKINPAIEKDTT                 | --PS--EMPSWVALRKKASD      | 2127 |
| Query_10019 | 2099 | TAEQTDWY       | [2]SED--                     | TLEMDDLNRHESMAKMSLKLHLVD    | --KKISPEQVKDVP                 | --PT--DMPAWMAPLHKKIAS     | 2166 |
| Query_10020 | 1989 | ----GAS        | LYQDI                        | EIEMDLKINQHPCCMILRLVQMKT    | -----EFGSNwnAK                 | --VMPGWMQRFVIVD           | 2045 |
| Query_10021 | 2163 | QRRSRKNRF      | [2]QTLTA[6]                  | VLESDSVNDHPCMATMVALLRHMKA   | --FKLIQPLEGVK                  | --PT--QMPKWMQNLQVSN       | 2048 |
| Query_10022 | 2054 | ---DEDSEI      | -QDVS                        | QLELDNVNKHCECMKIKRCDKMS     | -----LFKREWQDN                 | --TN--EMPKFMQNLCLIKR      | 2114 |
| Query_10001 | 2135 | SD             | T--QLNIRLFLAKVILNGESVFRPYAS  | FWFQPLVA--LAT               | N---                           | -MGLNLY--FSLDIIVTLL-SWH   | 2192 |
| Query_10002 | 2187 | QS             | T--HVNIRLFLAKVILNNEVEF       | TPYARFWLSGLLQ--LLI          | SGNT                           | GGEGIHY--MVVDVVVLL-GWV    | 2248 |
| Query_10003 | 2170 | SS             | T--HKNVRLFLAKVILNNEVFRPYAR   | FWLSPLME--MIV               | RGEA                           | SGEGINY--FIVDLLVTML-SWG   | 2231 |
| Query_10004 | 2136 | PI             | V--PLNIRLFLAKVILNTEEVFRPYAK  | HWLSPLLQ--LAA               | SENN                           | GGEGIHY--MVVEIVATIL-SWT   | 2197 |
| Query_10005 | 2145 | SS             | I--PLNIRLFLAKVILNNEVEF       | RPYAKFWLGPLLQ--LVV          | SGNN                           | GGDGIHY--MVVEIVVTVL-SWT   | 2206 |
| Query_10006 | 2113 | PA             | T--SFNIRLFLAKVILNTEEVFRPYAK  | FWLSPLCQ--LIF               | SGPL                           | SSDGINY--FNVDLVMM-SWH     | 2174 |
| Query_10007 | 2134 | TT             | T--HNVKRLFLAKVILNTEEVFRPYAK  | FWLSPLVQ--LMV               | R-DM                           | PDEGLNY--YVVDIMVTVL-SWS   | 2194 |
| Query_10008 | 2063 | GS             | I--NVRRLFLAKVILNTEEVFRPYAK   | FWLSPLIK--LIV               | MDEF                           | GSNLIHY--FRVDLIVLW-SWT    | 2122 |
| Query_10009 | 2208 | DT[1]          | L--HPNIRLFLAKVILNTEEVFRPYAK  | FWLSPLIE--YVI               | SNQT                           | GGQGIHY--FIRDIAMLL-SWP    | 2270 |
| Query_10010 | 2176 | IG[7]          | T--HINIRLFLAKVILNTEEVFRPYAK  | FWLSPLIK--LII               | EGRS                           | YEGINY--FIQDLCAIVT-VWG    | 2244 |
| Query_10011 | 2127 | AA             | T--HINVRRLFLAKVILNTEEVFRPYAK | FWLSPLID                    | PRKS                           | GGKPHY--MLRDIQVTL-QWN     | 2190 |
| Query_10012 | 2092 | YS             | Q--PRNIRLFLAKVILNTEEVFRPYAK  | FWLSPLIK--AIT               | DGVV                           | --GRAPNY--ILSDTVAMLA-DWC  | 2152 |
| Query_10013 | 2130 | TS             | T--SHNVRRLFLAKVILNTEEVFRPYAK | FWLSPLIL--LIL               | KFQD[2]                        | ETPGPNY--FVTDLCLLL-TWA    | 2193 |
| Query_10014 | 2115 | VY             | T--HENIRLFLAKVILNTEEVFRPYAK  | FWLSPLIG--FLV               | NSSL                           | --CRDLAQmdcFTLDLMVLL-SWG  | 2178 |
| Query_10015 | 2109 | AD             | T--PRNVRRLFLAKVILNTEEVFRPYAK | FWLSPLIT--CLV               | DGTI                           | --GDKINY--FFCDVMVMV-GWG   | 2169 |
| Query_10016 | 2107 | YS             | V--HRNIRLFLAKVILNTEEVFRPYAK  | FWLSPLIN--LIL               | NATF                           | --GREINY--FILDLMVLL-SWS   | 2167 |
| Query_10017 | 2153 | SR             | T--GRNIRLFLAKVILNTEEVFRPYAK  | FWLSPLTQ--FIL               | SGDS[10]                       | GENGLDY--FTVDAIATML-SWS   | 2224 |
| Query_10018 | 2128 | HT             | T--NRNIRLFLAKVILNTEEVFRPYAK  | FWLSPLIQ--LIV               | -EGK                           | ESDGIHY--FIVDLMIIL-SWA    | 2188 |
| Query_10019 | 2167 | SS             | T--HLNIRLFLAKVILNTEEVFRPYAK  | FWLSPLME--LIL[4]            | TEPA                           | GTEGINY--FIVDLVVTLL-SWS   | 2232 |
| Query_10020 | 2046 | LS             | T--GLNIRLFLAKVILNTEEVFRPYAK  | FWLSPLML--LDV               | SAVQ                           | KVSEFNY--ILRDCNVLnSWK     | 2110 |
| Query_10021 | 2239 | SS             | TgshPNVRILFLAKVILNTEEVFRPYAK | FWLSPLCQ--FAL               | SDRN                           | GGQGFHT--LLVDIVVFPV-AWS   | 2302 |
| Query_10022 | 2115 | PD             | I--HLNFKIFILKILNHPQLFSAYAK   | FWFEPITAN--YLC              | DKNN                           | GGKPHY--FMRDLCTLLI-SWN    | 2176 |
| Query_10001 | 2193 | EIAIPEETTVD    | IAMTSHLVKVIQNCYHQNRQ         | IMRNNLEVLKTLVEAWKSTIR       | --IPTQDIYENFIDREDKGRN          | 2265                      |      |
| Query_10002 | 2249 | TVAIPED----    | KRLANRLLEFLMHFCHHSNRQ        | VLRNNLEMIKTLVECWKEIIS       | --VPTSVIYRILATPDPVQDS          | 2317                      |      |
| Query_10003 | 2232 | PVAIPEDSANG    | RALTSRLLHFLMANAFHKTRAV       | MRRNLELIKTAVECWKTRVE        | --VPTKVIHQDLGSDASSKAN          | 2304                      |      |
| Query_10004 | 2198 | GLATPPTGVPKD   | EVLANRLNLFMLKHVPHKRAV        | FRHNLEIKTLVECWKDCLS         | --IPYRILFEKFSKDPNSKDN          | 2270                      |      |
| Query_10005 | 2207 | SVATPKGNMKD    | EILANRLLEFLMKNSFHEKTA        | VFRHNLEIKTLVECWKDCLS        | --VPYSLIFSRFSTDPNSKDN          | 2279                      |      |
| Query_10006 | 2175 | TSIPQDTAEE     | RAMSSRLVQFLMANIYHKNQ         | IYRNNLEMLKTLVECWHDRIE       | --IPYKIYINQLKSEENKS---         | 2244                      |      |
| Query_10007 | 2195 | SVAVPQDTAMD    | RAMASRLVEFVVRNVNHDTRQ        | IFRNNLEMLKTLVECWGRFD        | --MPTKIYDNFSDRDPKSKTN          | 2267                      |      |
| Query_10008 | 2123 | A-HLKEDEAIP    | KDSLNDLLKFCVKHCSWKS          | GVFRKRNRIETMLVLWKSFVT       | --LPSLILEKICFPLGNENEN          | 2194                      |      |
| Query_10009 | 2271 | N--IYQDQKLD[6] | KSNISKFINFLIQNSCADRO         | ILRNNLNILKLFVERWKGFLS       | --VEKKSIVEALATPVTNPKSK[5]      | 2352                      |      |
| Query_10010 | 2245 | SFITLESYQDK    | VL-IYELMEFLMKNSYNESRI        | VIRNNLIIKAIFEIWSSELIV       | --VPTHVIEHELFSDSVGNVDKV[1]     | 2317                      |      |
| Query_10011 | 2191 | VASAPDGR---    | --LATNFVHHLISVADHGS          | QVLRANIDIIRLPLENWKSGSIS     | --LERGQLLQYLISGGRNPDMM[8]      | 2266                      |      |
| Query_10012 | 2153 | RKTSLPAKSD     | HHLVSQLLYLLISKVHDDR          | VFRHNLEIRTVLVEWKPFD         | --IPVQLLYDMIMKHKRDPV[1]        | 2226                      |      |
| Query_10013 | 2194 | DTAVPQDSE-     | KRLARQLVQFLMENARHETTA        | VFRNNVNIIRLLERWKDAVQdk      | VPFKVINDMSSRQMASKDN            | 2267                      |      |
| Query_10014 | 2179 | SIQPKDQSEA-    | --KLNIRLFLAKVILNTEEVFRPYAK   | FWLSPLIK--LIL               | TEPCWDRMIQ--VPVELINNFLTSDHRKLS | 2249                      |      |
| Query_10015 | 2170 | SKAVPQDTVMG    | RNIVGRVLRVLCMNTPTQ           | TRADIFKYNLDVRSVVECWKSLT     | --VPYTVIYSLMEVKDGAERST         | 2242                      |      |
| Query_10016 | 2168 | SIAPEDSSIG     | RHAASGLLEFLMSKCPHIRK         | DVFRNNLEMIKTVVQCWKERLD      | --IPTYIIFESMRNLDTKVKDN         | 2240                      |      |
| Query_10017 | 2225 | STAIIED----    | RFLGSQLLEYIMLRNSHKNRS        | ILRNNLEIVRTMVELWKKDID       | --IPTRVLYDQFSNSDKSTVSN         | 2293                      |      |
| Query_10018 | 2189 | DVAIPKDVDEI    | LQ-ANRLEFLMRNAPYPNRS         | VFRNNLEIITKTAVELWKNHIE      | --IPYRIYKNFSPNDKDKDN           | 2260                      |      |
| Query_10019 | 2233 | TTAIPEDSHND    | RHLASRLGLFMSRTRHRHRS         | LFRNNLEIVKSVVEIWKSLH        | --VPAEVIFFNSDPDPVKKDN          | 2305                      |      |
| Query_10020 | 2111 | DVVV---        | SSLD                         | TT-TSRFVNLVKLCEDRRNL        | VDRSNVLLVTELIALWKDATY          | --INVRELIITFMSGDEDTKIK[5] | 2184 |
| Query_10021 | 2303 | GTAIPEDDLGD    | RDLVERLLDKLITGLCYDKERR       | IFKNNWRLLDALIRSWRSRVHc      | --VPYKRFIDLLQOTBEYATAA         | 2376                      |      |
| Query_10022 | 2177 | YIPEDNPKNRL    | LC--TNVNTLIKYSADTKMIF        | TNTEIITAGLLHRWKLVA          | --INKDVISMMIGMDDKPKESN[3]      | 2250                      |      |

Supplementary Figure 5: COBALT analysis DNA-PKcs from representative examples from all major phyla (short list)

|             |      |                                           |                                                            |                           |
|-------------|------|-------------------------------------------|------------------------------------------------------------|---------------------------|
| Query_10001 | 2266 | VVGLQIVGVFLANGLSPWQPD--A---EVSKD          | RFYQYLLAMNMN-QPDKQVYSASAEIVGMALSSQLQNTESDKEWcR             | 2335                      |
| Query_10002 | 2318 | STGLQLLGLVFLANGLHPIDKA--S---DIDEE         | RFYAALSYNLK-NRYKMHVAAAAEVI GMAMKQKADVDKVTD--G              | 2385                      |
| Query_10003 | 2305 | SVGQLLGLVFLANGLPPNPS--Ts-gNIDRE           | QFFSAVAKNLQTRTYKDVYAAAAEVI GMIMKYMADVEKVTG--G              | 2375                      |
| Query_10004 | 2271 | SVGQLLGLVFLANGLPPYDPO--C---GIQSS          | EYFQALVNMMSfVRYKEVYAAAAEVLGLILRYVMERKNILE--E               | 2339                      |
| Query_10005 | 2280 | SVGQLLGLVFLANGLSPYVPK--C---EIGYE          | RYFQRLVYNIStRyKEVYAAAAEVLGLVHYFAENKQVd--G                  | 2348                      |
| Query_10006 | 2245 | -VGIQLLGVVITCKFPYPGPD--C---PVDRH          | KFFTtVAFLMC-DKSKPvYtATGEVVMGLKYLEVKEQETE--G                | 2311                      |
| Query_10007 | 2268 | TAGVQMVGVFLANKLPAYSyT--S---EVDRE          | KFYKALASNMG-SYWRtSSAAAAEVI GMCLQDLDQHDKDFK--E              | 2335                      |
| Query_10008 | 2195 | VCGSILCLCLNTVPEtFSFL--Td---PNYES          | GIFSHLVRLLS-LKNVLFKLAAFVCGLSLKLNLNELQDCEw--                | 2263                      |
| Query_10009 | 2353 | STALIQLSILLSSNGYAAYDKE---ndsEISEF         | KFYQLIDCLT--EYKELYDAASEICGMILQFNHKKNIQSV--                 | 2420                      |
| Query_10010 | 2318 | -TGLQLLGVVLAHDKPLFQDEvGldlgGLTSD          | KFYMDLTNNLlnhVNSNVRALAAEVCGLVAKHLRKYHCSEA---               | 2389                      |
| Query_10011 | 2267 | LVGLQLLGAIVGSGIPIYDPS--CdfstSEEH          | -ICEALLNNLN-VKtKEVYAAAAELVGI TMIYRKESRQVNE---              | 2335                      |
| Query_10012 | 2227 | EPGIQVAAILLANRLEPW----S---STGKL           | QFLRALLRNID-TEKRSIFQSSAEVAGMALELLAANGSGML--eG              | 2292                      |
| Query_10013 | 2268 | LSGLHLLSLILANLMPSESD--VeeaaGLSMR          | SFFQILVANLM-FKRSRvYtAAfVtGMLLSHFKSKGRGRL--LD               | 2339                      |
| Query_10014 | 2250 | --GQLPGVVLNSNGIENYEYp--M---DISRL          | DFFKSLINCIK-EPSKLIHAPAAEVI GMILKR--FDSHDKY--               | 2313                      |
| Query_10015 | 2243 | EAGLQLLGLIILANGLPPYTVd--S---ETEKK         | RCESLVIRLLG-AHYASvYgAAAEVGMGLILKYTSQKDGSVE--aL             | 2311                      |
| Query_10016 | 2241 | IVGIQLPGIIVSNGLDPYQNT--S---RIDKI          | SYLkTLTVNLK-NKYKEIYESASEVCGMSMKYYPKDDDDVY---               | 2307                      |
| Query_10017 | 2294 | LSGQLVGLI AVANELNPyDTN--Ta-gSLDQG         | LyyKI FVNNTf-KYKLIYAAAAEVLGMIMKRMAESYDPFL--D               | 2363                      |
| Query_10018 | 2261 | STGTCQLGLVAVANGLSPYRYD--V---EVDME         | L---ALAE NLQf-KYKEVYEA AEVtGMIMKHLASVKKETE--G              | 2325                      |
| Query_10019 | 2306 | AVGQLLGVVAVANGLFPVtSD--S---TIDED          | RFYGTLVNNTf-KYKDVHAAAAEVI GLLMMQLAKVKKIFD--G               | 2373                      |
| Query_10020 | 2185 | -VALQIVSAMLVAGLKSELQAEvAnq-TIEDG          | -----ILLCMT-TKvTSLYtLAAAEVGLLYLTMDQATSKCF---               | 2249                      |
| Query_10021 | 2377 | -AGLQIVNAYLSNALPYFNEQgVnvgGVDDSP          | QILAAALVRLLN-HSRKEVYSPCAGVtGLCLRQMVTAQSVVSP--              | 2447                      |
| Query_10022 | 2251 | MTGIQLLAVSFDILVIEKPenIqqtNvNR [14]        | KLMNSLLKILE-SKKKQIQAASETLGKIL-----NKQPS---                 | 2330                      |
| Query_10001 | 2336 | AYGDNIQKMLLGIHGNK P----                   | DQFLTCVHC---IQKHFSAF-VE-RFIHKVLFMLPGLYGVF--RTYALEI IAAGIE  | 2402                      |
| Query_10002 | 2386 | FLHSIVTS ELTKISEIK P----                  | DVfVTCIHK---LHFHYPEF-AD-HFTNKLLFMLPSLHGQP--KTLCELVVASRV    | 2452                      |
| Query_10003 | 2376 | SFHTQVERYL LPLQVNO Q----                  | DVFLFCVHK---IHLHFPPF-AD-RFVSKLLFMLPKLHGIF--RTHCLEVIRGRVN   | 2442                      |
| Query_10004 | 2340 | SLCELVAKQLKQHNTM E----                    | DKFIVCLMK---VTKSFPPL-AD-RFMNAVFFLLPKFHGVL--KTLCELVLCRVE    | 2406                      |
| Query_10005 | 2349 | LVHDLIAKELKQIQSSK E----                   | DKFIVCLSK---IVKNYPPF-ADrRFLNQVfYLLPKLHGVL--KTHCELVVMHRAE   | 2416                      |
| Query_10006 | 2312 | EFHTYIINNISSLQLSK P----                   | DNFIVCIHK---IHQQYPT-AD-RLLNKLLFMLPNLNGES--RRLCELVHGRIG     | 2378                      |
| Query_10007 | 2336 | EYVNHLSVLSSTQSSN P----                    | DYMLCVVK---MHLHKKPI-AE-RFMNKLLFMLPRLHGVE--KRHCLEVISSRV     | 2402                      |
| Query_10008 | 2264 | -LLKNMKAVMSRMTGTM L----                   | GRSKCLPLHE---ILPNYPEF-AL-QFCNDLLDWFPVSLHGDL--KTACLEGFVAVSK | 2331                      |
| Query_10009 | 2421 | -FEKLLKDKISSFLSQS ---                     | DYQALNCLYF---IGLHHPF--IlQFQLKLLNLPQLSNEI--RLVAFNVIYWIAD    | 2487                      |
| Query_10010 | 2390 | -LSSLNPLQKISGMY [5] NeSDMKNF LTVIHH ---   | SMHDVDV--AvRFLKYVfGILPRLLN--nKILALEI ISFCAG                | 2463                      |
| Query_10011 | 2336 | ---EILEAKLHKILKQL [1] ReAEYERFLN ILNK --- | TIRHPGF-LE-GYAEMVVDQLSRLFGAY--KVNALDTLRFPK                 | 2404                      |
| Query_10012 | 2293 | DDAEFLSGIVDKLNLTK D-QSKD                  | KFLCFLA---VQEYYPRI-VD-AFMNHVLFHLPKTYGIF--RTMCLKI VYSRLE    | 2362                      |
| Query_10013 | 2043 | ELMNEVVARI DQLKDD DaTSKERL I              | CLHElcnVNTGHPPV-Vd-HFVQRLFLAPSLPGQF--KtMALETLLWRAE         | 2413                      |
| Query_10014 | 2314 | --FENTVSHLFEILREA D-T---                  | SLFITSIHK---IQLNYAA--ISerFMTKLVFFLPQLYDGF--KKMCAESILSSIR   | 2379                      |
| Query_10015 | 2312 | EDA-----VVKRVTELT V-KMQG                  | QGLTCIYN---IHKHYPSF-VK-RLINKLLNLLPKLYGIH--RKNVLECLIAHSA    | 2376                      |
| Query_10016 | 2308 | --SEFCKIVKTEISSLN A-K---                  | DQYLTCLYK---INTHPFIF-IDsSFLNKILYMLPNVHGIF--RKQILEI INSHVE  | 2374                      |
| Query_10017 | 2364 | RLEEMVGEQFKLSQPL E-KSEDK                  | FIICLHK---ITLCYNKI-VP-RFVEKLLFLLPSLQGVF--RSSCLEI LDTOAD    | 2433                      |
| Query_10018 | 2326 | PIFDYVTQHLSMVSAG R-MDVAR                  | FILCLYR---VQLHYPII-AD-RFVNKVLFLMPSLYGEF--KTKCLEI ILARAD    | 2395                      |
| Query_10019 | 2374 | PLHDMVGQKLLSLVNR K-PEL                    | DKFITCVHK---LKLHYPII-Vd-RFVNQILFTLPSVHGDF--KSYCLEI LCSRVE  | 2443                      |
| Query_10020 | 2250 | -----LCNLKKLIAADS [1] TsEEI               | GYFLALRN---VSIHQATI-Vds-----IMLQRLSSVLSKAVSVDVAWALLAA      | 2310                      |
| Query_10021 | 2484 | AFYKQVAEQIGKMLTAR ---                     | PDAGLHALQ---VSRCCPRL-ACiEFQRLLFQLPHLTGDS--LADCLVCLAAAT     | 2515                      |
| Query_10022 | 2331 | ----LVAQS IHPMLMNE [1] -tERHD             | VFVHSIEK---TREYPELlIDrKIFMKLLSFVKVtLGTGSM--RASILKSPFRFIN   | 2399                      |
| Query_10001 | 2403 | NI EGAFVEIKNKNIIG-I                       | LRE RDELSQLMSLKIIRRLLEKL-EASQL                             | L-YLLP-A--IC EISD 2459    |
| Query_10002 | 2453 | HI PNIFLEMKSKGIVE-L                       | LTH RDEGTQLVSLKLVNAMLPNL-KPDEI                             | L-YLLP-P--VR TVFN 2509    |
| Query_10003 | 2443 | VI DNLFL ELKTRNFLG-M                      | LTH RDDGLQAI VLQIVYALLQKL-KVEEL                            | L-YLLP-S--VA AFAS 2499    |
| Query_10004 | 2407 | GM TELYFQLKSKDFVQ-V                       | MRH RDEERQKVCLDIIYKMPKL-KPVEL                              | R-ELLN-P--VV EFSV 2463    |
| Query_10005 | 2417 | TI IDIFQELKKNFVQ-I                        | MSY SDEERQVCLD IYVKI IAKL-KAEV                             | K-VFLV-P--VI AFIS 2473    |
| Query_10006 | 2379 | QI DNVFME LTKG LLS-F                      | LTQ RNEKSTQVALNIITSIREKL-KSKEM                             | S-SLMD-S--IT AFSH 2435    |
| Query_10007 | 2403 | NM ENAFTELKKNGLLT-M                       | LTH RDDSSTQAVCLKIVNELLRLL-QPDEV                            | L-YFLP-A--VT AFSS 2459    |
| Query_10008 | 2332 | YK GDFPEELKSRGFLK-V                       | FSL RYERDQMLGMIVKNLHANL-TVENI                              | S-DLVS-S--FS SVIG 2388    |
| Query_10009 | 2488 | DI PELFLKLSKANLDS-L                       | IRI REEQTQIIILKILFKLIKNNYTTDQT                             | LlQIIN---LL [2]RFNQ 2548  |
| Query_10010 | 2464 | HD PDLFTNLQRDRLLG-F                       | LKH RDENEQLLALRILAGLILQEI---EV [4]                         | --YYLD---gLI [1]SFQD 2521 |
| Query_10011 | 2405 | AD [1] -NLFNQI-SRSLPK-L                   | LAH RDEIAQLKILQLLSQLLKNV-NQDTI                             | RtrVLP-V--LC [1]NFNG 2462 |
| Query_10012 | 2363 | IL [1] DDTYAE MSKNLFK-T                   | LSD RDPDQNLALSIVHKMVPHL-KPEQL                              | E-ELVH-E--IC KFET 2420    |
| Query_10013 | 2414 | DI PDLFR ELQKG LLS-L                      | IKH HHTETLQAVLSILKVLHHL-NASSI                              | K-QFLPsV--TA NCCS 2471    |
| Query_10014 | 2380 | VL QDPLFKSKN--FID-M                       | LTH RDTPIQLILCKMIHETLDKQ-TDEDL                             | D-RLMP-H--LE KFIH 2434    |
| Query_10015 | 2377 | TM EDIYLHLKEQNLDD-I                       | LAK KEASTQVALQLVNAVMPRL-TPSQL                              | L-YFMP-G--VV AFAS 2433    |
| Query_10016 | 2375 | NI ENAFELKKNQGLLN-M                       | LEH RDESIOFSSLNIIQKLLKEL-DIDKM                             | L-NVFP-I--IS KVHK 2431    |
| Query_10017 | 2434 | VQ PQFYLKLKDKGFHT-M                       | ISH RDEATQTASLSIVQKLLVQL-TNDQL                             | S-EIVPiL--IA SFSK 2491    |
| Query_10018 | 2396 | HI KELYTELRNKG LKD-M                      | LLH RDESKQVSLDLVRAMLKNL-DISQI                              | L-YLAE-L--VA TFKT 2452    |
| Query_10019 | 2444 | HI PNLFTELKRGRLKE-M                       | LSQ RDDGIQIGVLR IIKHMKKL-TIPEL                             | K-FIFP-L--LT SFVS 2500    |
| Query_10020 | 2311 | DT --VYNACGNDGVVKdI                       | FTH [11] RHSGVQISTLR AITRLLDHL-TMSEL                       | Nr-LVA-S--TS [9]-YQG 2385 |
| Query_10021 | 2516 | AA [9] PNAAVELKERGFDPsL [5] LSS [7]       | AESRVPQNSHALCERLLLLLqQERL [11]                             | RvWLLAaVgeMC [9]SVAA 2619 |
| Query_10022 | 2400 | VC [9] NEIAMSL LADSEET--                  | LAD [1] SDENQSFLLITQIAKLLNdtGDKL                           | MqRVLP-R--LK [2]-FQH 2468 |

Supplementary Figure 5: COBALT analysis DNA-PKcs from representative examples from all major phyla (short list)

|             |      |                                   |                                                               |      |
|-------------|------|-----------------------------------|---------------------------------------------------------------|------|
| Query_10001 | 2460 | LSSVLCRREMYQILMWCYDNYKDEA         | QSESR--DEIITLTKDVLRLGLSDDDLNRLTVQNFWSHETR-LPGETVERL           | 2533 |
| Query_10002 | 2510 | LPSPACREVMYDILMWIYDNFRDEE         | SRTEDGADDILCMAKDTLLQGLSDEEASHRLRVSNFWSHETR-LPTGTLERL          | 2585 |
| Query_10003 | 2500 | HPAPECRRTMYDILMMWIYDNYREEA        | SQQES-AGRVLTGAKDCLLQGLSDEEYSLRLLVQNFWSHETR-LPTGTLERL          | 2574 |
| Query_10004 | 2464 | HPSTTCREQMYNILLMWIHDNYRDEP        | SETDNDSQEIFKLAQDVLQGLIDENPGQLIIRNFWSHETR-LPSNLTDRL            | 2539 |
| Query_10005 | 2474 | HPSPVCRERMYDILMMWIYDNYRDAE        | SQSDPDSKAVFVTTKDTLLQGLTDNPAQLYVRNFWSHETR-LPTGTHDRL            | 2549 |
| Query_10006 | 2436 | HPSTLCRKMFEELLMWIYDNYREDE         | CTEGH---EIMLTKKECLLKGGLGDEMMCRLLVQNFWSSDTR-LPTGTLDRM          | 2508 |
| Query_10007 | 2460 | SPSPMPCRGLMYDILMWIYDNYRDEN        | NATVH---QIMSRTKDALLNGMSDKDLGLRLRVNFWSHESR-LPAGTLERM           | 2532 |
| Query_10008 | 2389 | NFSPSCRRAPAECCCLSYTKLSSLN         | -DSSENSKAALATTKMHLLTMLSDSNKSIROLVYNFWDASR-LEITSARL            | 2463 |
| Query_10009 | 2549 | SPNETCRLLYYDIFPMWIHDYLEKDV [ 3 ]  | -----NQIRLTLIGLSDSEAVKRKLEFPWDSKSE-LSLSTVQRL                  | 2616 |
| Query_10010 | 2522 | HPNNDCRRTYYTILVKMYNKINGTV         | -----EIKHKLKINLLRGLIDTDESIQALIEFWHAQEE-LSHNTFTKL              | 2589 |
| Query_10011 | 2463 | HENVDCRRPEYELIYLFPKNKGMK [ 5 ]    | -----QSLLMGLCDSSDIVRASLQNFHWLQLS---QDVRHRF                    | 2526 |
| Query_10012 | 2421 | QRSVKCRSVMYELIKWIYDHCQ---         | ----DIGGVLIBEAKGILLKGLRDDPHLQDSIFEYWNSDAQQRDASTDRL            | 2490 |
| Query_10013 | 2472 | HDDYTVRAIAYDILMAVYDQKLSHE [ 7 ]   | DDETAALTEIAQLARTHLLGLQDSSPKLRQSIYAYWQEKRLARNPVQRF             | 2554 |
| Query_10014 | 2435 | HPHLSCRYQFVLLISLSLEYIYQFKV        | -NQIGSTSQILNFSKENLLKALIEDETSIRVMAQNFWEKAD-MPSNTIDRM           | 2509 |
| Query_10015 | 2434 | HPAPSCRETMVDVLFVVDYDNFNND         | ---TEDGHQLESQARGVLLRAVKEEDDALRQIVLNFWLQGA--RSMTLTQCL          | 2505 |
| Query_10016 | 2432 | SAETICRKMVYELIMHAYEKFNK-          | -NGI-KEKEISRYAKEMLLHGLADSDLTLRLTVHNFWSQNH-LPAETFSRI           | 2504 |
| Query_10017 | 2492 | HGSIQCRIVLYNILLMRVYKLTDD [ 1 ]    | SESDSVKMIIRSISRQDQLLGLGDESENEVKLMYBYWNQESN-LSSNLTDRL          | 2568 |
| Query_10018 | 2453 | NPSAACRQKMYGIFMWIYDTRFQE-         | IDKNDTEFKQLINFCQDQLLQGLNDSSEENRQLINFNWNNNR-LPSGTLERL          | 2527 |
| Query_10019 | 2509 | HPNLLCRDLMYDIFWYDYSYRADE [ 1 ]    | FQAEBSGADYLADAKDHLQGLADHRDLQKLRNFWSDEAR-LPGTLERL              | 2577 |
| Query_10020 | 2386 | HALSVCRGLLFSIAKNLYHKDISDP [ 3 ]   | -----KVRI-SLLHGLCDPEELRNEAYNFWSNFAS-IKKSQDRL                  | 2452 |
| Query_10021 | 2620 | LTLPAQARRQAYQLLATWYPTHNL [ 2 ]    | -----ALLAGLTDSAESNRWLLFWSRNSG-LPSEASARW                       | 2681 |
| Query_10022 | 2469 | NKNDSYRGLFYDLMVLYDQFENFK [ 1 ]    | -----LVKSALIRGLSDKTKVVRNKLISFWSDSRR-LGLDPNQRL                 | 2533 |
| Query_10001 | 2534 | VAMLEAMYTPSTELHY                  | LSYATNLLLEMTKSSDFNRVLFDTPLSECKFQDF--AVSSTWYQRHAAM-TPMFLDTQS   | 2606 |
| Query_10002 | 2586 | VAMLECMYSPGTEHQY                  | LSYASSLLEMTSKSPDYKREIFEHPLSECRFQDV--TIDHSWKQRHLAIsTPMFVETQS   | 2659 |
| Query_10003 | 2575 | VAMLECMHSPRTEPQY                  | LSYCTNLLLEMTSRSPDFSRREIFQHPLSECRFQDV--QIDHSWKQRHVAM-TPMFVETQS | 2647 |
| Query_10004 | 2540 | LA-INSLYSPKIEVHF                  | LSLATNLFLEMTSMSPDYPNPMFHPHPLSECFQEQY--TIDSDWRFRSTVL-TPMFVETQ- | 2610 |
| Query_10005 | 2550 | MAILRSMYSNKIEIQY                  | LSIATNLLLEMTSRSPDYTRMFYPISECKFQDY--NIDSSWQQRSTIL-TPMFVETQ-    | 2621 |
| Query_10006 | 2509 | VAMLEAMYSPSTEQY                   | LSYATNLLLEMTKSPDYKREIFEHPLSECRFQEF--SVKSSWKQRHAAM-TPLFAAT-I   | 2580 |
| Query_10007 | 2533 | VAMLEAMYSPSEVSSY                  | LSYATNFILEMTKSPDYNRREIFEHPLDCCPFEDF--VVRSSWKQRHAAM-TPLFAETQF  | 2605 |
| Query_10008 | 2464 | LNCLSLQYTCATESTF                  | LSHASVYMLLELTCSPDYTRLIYDHPLEDCTFENL--PISTHWQSRYASLeVPAVMQPTDM | 2537 |
| Query_10009 | 2617 | MQLFEKMYTKETESQW                  | LGYYCSLLLQLCRTRSDFTKLLFDKPLSECTFREY--NLDASWQNRSTNM-NPLFSSSQL  | 2689 |
| Query_10010 | 2590 | KELIGNLYSTESENLF                  | LNACYLLELLEGSKSIENYKPIFDQQLPQSRFDENyDIDTSWRVNNMT--PLFINTQT    | 2663 |
| Query_10011 | 2527 | LELVNRIYDPCLEENW [ 1 ]            | -QISNVLLKLEEDSVYKRPIFSAPLSECVFQDY--TINTSWVGASLPM-TPLFSSSQM    | 2599 |
| Query_10012 | 2491 | FLILTDLYCPATEHIF                  | LGYSTQVLLLEATAGTPDYNQKIFKEPLQKCFEDF--RMLLSWAQNAATV-APMPADTLA  | 2567 |
| Query_10013 | 2555 | YDGLTSLYVPEAEFAV                  | LQFVTNVMQLTKHSPDYDRELFAARPLSSSTWRNY--RVDASWQRNAHM-TPLFAATQO   | 2623 |
| Query_10014 | 2510 | LLIVEKLYSPKTEREF                  | LSYSTNLLLEKTKSPDYNRLIYENPLSECFREY--NLSADWRRRHEIM-TPLFAETVT    | 2582 |
| Query_10015 | 2506 | LHILRKMYSPESEDSF                  | LQMAIYVLEATRHSAADYQRNIFDQPLTECKPREM--KVSTAWRARHASM-IPMPAETQA  | 2578 |
| Query_10016 | 2505 | KAVLQKMYSPLEHMF [ 39 ]            | LQYSTFLLLEMTKSPDYNLKIFQNPSTCAFNQY--AISSSWKKRHATL-TWPFVDSL     | 2616 |
| Query_10017 | 2569 | TQLLVTLYSKKTETQF                  | LYHATNLLLELTSRSPDYNRVLFDTPLSECRFEDYK-EIDLSSWQRHLQM-TPLFAATQL  | 2642 |
| Query_10018 | 2528 | SSVLYALYSFNLAESF                  | LSYSTNLLLELTSRSPDYKLSIFDHPLECKFHXY--NVNYSWQYRHAMM-TPLFAATQL   | 2600 |
| Query_10019 | 2578 | VEVLRALYSTTTEIQY                  | LSYTTNLLHLTSLSPDYERLMFQPLSECFREY--QIDYSWQKRHLAM-TPLFAATQ-     | 2649 |
| Query_10020 | 2453 | LSIFGSLHSSLELDENW                 | ILYATNLLGLSKECNEFKQPLFKISLGGGEYTTT--QIDASWEAKAQSMA-APLFSVEAD  | 2525 |
| Query_10021 | 2682 | FALLSRCHGNNTADDD [ 16 ]           | -AFCSAVQLDACSSTPDFRRMPDRPLADCPRECF--RIDADWRRRHGGLmTPLFLETQO   | 2770 |
| Query_10022 | 2534 | LQIMNDLYTQEBENIW                  | LNSVFLLMQICQSSSDNRRKIFDAPLQDCKFQPLeiNQFGHLNRSQPL-TPLLSQMDQ    | 2608 |
| Query_10001 | 2607 | SQ-----SNDSPADGLST--G---Q         | LRATQ-DAAQFTQ---TQA [ 3 ] SKGPYNWLTQSS LDT---FSDSQN           | 2660 |
| Query_10002 | 2660 | SQ-ASSGSQSQSPDSSLSLR--G---E       | IRATQ-DAHQFIA---TQQ [ 6 ] RKNAYNWLTSQ -DT---FAD-YS            | 2720 |
| Query_10003 | 2648 | SHPASSQSQQAQSLSQGGQDTLGG---Q      | LRATQ-DVLQFTA---TQ- [ 4 ] PKNAYNWLTSQ LDT---FAD-YS            | 2709 |
| Query_10004 | 2611 | ASQGTQLTRTQEGSLSARWPVAG---Q       | IRATQ-QQHDFTL---TQT [ 2 ] GRSSFDWLTGSS TDP---LVDHST           | 2672 |
| Query_10005 | 2622 | ATQNSSRSQSQEGSLTAQGTIGG---L       | VRGTQ-THYEFTP---TQN [ 2 ] ARN-FNWLTSQ LDT---FAEYSL            | 2682 |
| Query_10006 | 2581 | ST--VSESME-----GVEDSLDG---G       | VRATQ-DVQ-FTA---TQD [ 2 ] SNAPPNWLTSQ LDT---YGD-YG            | 2633 |
| Query_10007 | 2606 | SL--ADGTQS-----GSPDSSFV---G       | VRATQ-EIQQFTP---TQG [ 1 ] VKAPYNWLTSQ LDT---FAE-Y-            | 2657 |
| Query_10008 | 2538 | HSEVSKFISRKRKMPYGRRTYSTE---       | ---STA--WPGFTP---TAI [ 2 ] LKKNVGNISADT [ 4 ] LDE-----        | 2594 |
| Query_10009 | 2690 | DEE-----SSQLPTFDGdnfG [ 1 ]       | -RATQ--LPMFSL---TQS [ 1 ] ---FSQFYPSSG [ 1 ] ---SSYS          | 2734 |
| Query_10010 | 2664 | SKQ-----KGNLkrQ [ 3 ]             | VRATN-EDLAFSL---TLG [ 1 ] ---GNA [ 1 ] ---LGSQVA              | 2702 |
| Query_10011 | 2600 | SMDIQGMHGEDR-----DGEFDGathH [ 4 ] | IRATM-----TP-s1QA [ 1 ] ---TQT [ 1 ] ---G                     | 2644 |
| Query_10012 | 2564 | SQLIQTQSL-----SGTGEHTGagpL        | LRATQ-ASLAFQP---TIE Q-----SGSS IGS1-----                      | 2608 |
| Query_10013 | 2628 | SQ-----ASAGEGEGEDEFSG---          | VRATQ-ASLAFTP---TMA [ 1 ] ---LTGTA [ 4 ] TFEpggISGQTL         | 2681 |
| Query_10014 | 2583 | NT-----F---TESVDLR-hN             | LRATQ-QTLQFQP---TL- --KVYDWLTSQ IDT---FTD---                  | 2624 |
| Query_10015 | 2579 | SNDTSLNSLLSYTQGSDTNMETDgaG        | VQATQ-ANV-FSA---TQA PGATYNWVDTST FDTtlaDMEYEA                 | 2643 |
| Query_10016 | 2617 | SA-----ASFSDTSVKNIKID-eQ          | IRSTV-DVREDFP---TQD [ 2 ] SKKAFNWLTSQ IDT---LGD---            | 2667 |
| Query_10017 | 2643 | SQ-----TQSDTSGSITG--M             | LRATVqQSLAFTP---TQG QESSYNWMTPSA [ 2 ] VDYSv---PSF            | 2694 |
| Query_10018 | 2601 | GSQGS-----MA-SFSLSGSSSTDehL       | LRATQsTNLQFTP---TQD -TDARNWLDPSS [ 4 ] IQSyaaFLQQSL           | 2664 |
| Query_10019 | 2650 | GSHGSGMTPTE-SMSVDGSPG----         | LRATQ--NLQFTP---TQD [ 2 ] RSTAFDNLNPTQ [ 3 ] LQP-----SQSF     | 2708 |
| Query_10020 | 2526 | KFW----- [ 2 ]                    | LQSTQ-----QPScrNNT [ 1 ] ---LQSED [ 1 ] ---                   | 2550 |
| Query_10021 | 2771 | QQQQKASDVEPGTLRQLQDGDGataa [ 11 ] | LRATAvGPGMFEA---TQL [ 1 ] ---PSA [ 1 ] --Tag1LAD---           | 2836 |
| Query_10022 | 2609 | IFQ--ASQMKAQDQLGVIKVQENepD [ 9 ]  | IDTV---SNSNR---NQR [ 6 ] SQIGSQSVVEIS [ 4 ] QDGNFvRATQVP      | 2690 |

Supplementary Figure 5: COBALT analysis DNA-PKcs from representative examples from all major phyla (short list)

|             |      |                          |                            |                                           |                                               |      |
|-------------|------|--------------------------|----------------------------|-------------------------------------------|-----------------------------------------------|------|
| Query_10001 | 2661 | LTLATQ                   | S-ESSLMFTVGS               | SRIKSSKPT                                 | --GSEFGQRKVRSDVr-----VSAMDEANKEIMRLKRRFI      | 2720 |
| Query_10002 | 2721 | TSSASD                   | --QSSLLFTLGA               | SKMGRGRQG[4]                              | ATDAGFGKELQSDQprgrDEVD--AKQSGEDKINRLKRRFL     | 2791 |
| Query_10003 | 2710 | VPLGTE                   | T-QSSLLFTTDA               | SKKVAKARR-[2]                             | PVGPFGSDRLSA----gRDQTDGRAAEDSQSSEIMRLKRRFL    | 2776 |
| Query_10004 | 2673 | PS----                   | --SDSLLFARHR               | SERLQRAPLK                                | SVGPDFFGKRLGLP---gDEVNDKVKGAAG-RTDLLRLRRRFM   | 2733 |
| Query_10005 | 2683 | PSLASE                   | PgSSSLLVFSRW               | SERLHRPAKK                                | PVGPDFGKRLALP---gDEVDSKTGIVDQADLILRLRRFL      | 2750 |
| Query_10006 | 2634 | SMSSSE                   | T-PSSLLFVSGT               | SGSQST--NK[3]                             | KAGFGLRRQTIIVKQ---LGHAPKS-EGMLNKSdTIVWKLRRRFQ | 2700 |
| Query_10007 | 2658 | STQSME                   | T-QSSLLFNVGT               | ANENQTPKKK[3]                             | KTGPEFGKRLKME---gTDFTDs-REDDSEKEEIQNLKRRFL    | 2726 |
| Query_10008 | 2595 | ----SD                   | S-SDNLTIVLIDK              | ILQDIKKPKS                                | -----SRVKKVD-----DLGDQLQFLKRRFL               | 2638 |
| Query_10009 | 2735 | ELSSSQ[4]                | SaTTSSTTFVSGS[3]           | ----SSQSGK[1]                             | -----GNKRTVNNK--pEDKAGTFKVPANIDPRVEMEMRRFK    | 2801 |
| Query_10010 | 2703 | GYSLTQ                   | ---SNLLFSQSF[2]            | ---SLPRSDQG                               | -----GTQKSVRSS-----EYQRFRRSF                  | 2746 |
| Query_10011 | 2645 | TLSSSTQ[1]               | -vNGSVLYGLSQ[3]            | ----GAGYIK                                | -----KTGLEEASWMD-----PALHLRRRIL               | 2692 |
| Query_10012 | 2609 | ---PSF                   | S1SSSLLFTTGS               | SFENQRKSYK                                | -MGPGFGSSKLQPI-----PEVSDEVDSRSDRLAPNLHRRFL    | 2669 |
| Query_10013 | 2682 | THTQYT                   | AaQOVLFF----               | ----ERRRNR[4]                             | SVDPPLATPQRAAER-----QAREAREIQRLRRRFV          | 2736 |
| Query_10014 | 2625 | -TALID                   | T-KSSLLF----               | -----KTESKNKd-----SDEKEVLK-----RRRFI      | 2658                                          |      |
| Query_10015 | 2644 | THAPTQ                   | GsTSGLLFNVGA               | SGQKDRRRFK                                | -R-PGIGNSRMRPAD---EPDGNDAADTMQSKL---IRRRFV    | 2705 |
| Query_10016 | 2668 | -WGSSS                   | T-SSSLLFTIGS               | DTKKIPNIDE                                | -----NNRNSNQD-----TSKNKIEKLSSNTFPHLRRRFL      | 2723 |
| Query_10017 | 2695 | TVGATP                   | TsDSSLLFTRPT               | MRRPPLKNPLR                               | -----ISAERLGVK-----ESEGGTEKEKRRKQVLQKRRAL     | 2755 |
| Query_10018 | 2665 | SSTSTQ                   | T-SSTLLFLSSK               | SPRQRPLMQK                                | PLSKDFGQQLSSE--taSQPSQSVQSPSS--LNHLRRRYI      | 2730 |
| Query_10019 | 2709 | AMASTQ                   | T-QSLLFLFSTSQ              | SHKRRKM-LK                                | PVPGDFGSQKLSQA--ssSRISSHQSQDPNEKKEILKLRRRFL   | 2775 |
| Query_10020 | 2551 | ---SLRD                  | TmQSQLFSPQA                | SVRLKSSYRQ[1]                             | IVDPTFDLRNRFST---RRNFADSSAVEDKSINDKLSKRFY     | 2617 |
| Query_10021 | 2837 | ----SQ[2]                | SvSTLFLRSSG[2]             | -----GGGA[4]                              | SAAGGLAGYHTALGS-----DANPQMGAAQLHRLRRRF        | 2898 |
| Query_10022 | 2691 | VFTQTQ[5]                | LiASNFYGNRRS[4]            | TDSISASFYE[1]                             | ---NKFNKKRPNGQ--vNLRIGAQSQDKVADDDGGFIAPVA     | 2767 |
| Query_10001 | 2721 | H--DQESTAR-FFM           | KRNVRMKMREDIQREKMKREH      | QVTMYRQYRTGDFPDIQIKYSFLIAPLQALAQRDSTIAK   | 2793                                          |      |
| Query_10002 | 2792 | K--DHSSSQA-YFA           | RREMRRKQLKELILEQREKRFST    | VTMYRRYRTGDLDPDIQIKYSFLIAPLQALAQRDASLAR   | 2864                                          |      |
| Query_10003 | 2777 | K--DQDVTKA-YHA           | RQIRMQMKREERVKERQAKRGNL    | VTLRYQYRVGDLDPDIQIKYSYIAPLQALAQRDMSLAR    | 2849                                          |      |
| Query_10004 | 2734 | R--DQEKLSL-MYA           | RKGVAEQKREKEIKSELKMKQDA    | QVLYRSYRHGDLDPDIQIKHSSLITPLQAVAQRPDIK     | 2806                                          |      |
| Query_10005 | 2751 | K--DREKVS-L-IFA          | KRGIREQRAEQKIKTEKRMERDA    | KVTLYRSYRFGDLDPDIQIKYSSLIAPLQALAQKDHSLAK  | 2823                                          |      |
| Query_10006 | 2701 | K--DKDDR-L-FFM           | KKNVRLRKRREERLEKQKSRREN    | QVTMYRKYRTGDLDPDIQIKHSYIAPLQALAHRRDSTIAK  | 2772                                          |      |
| Query_10007 | 2727 | K--DQRARST-YFA           | KKNIRLQAMRQEKLEKQLRREA     | QVTMYRKYRTGDLDPDIQIKYSYVIAPLQALAQRDNTLAK  | 2799                                          |      |
| Query_10008 | 2639 | K--DTEEKAF-FV            | NLNRKRQKVIERLKQO-----      | SLDLRCKYRRGDFPDIQIPYSAVIIPLQAVAEELDRVAG   | 2703                                          |      |
| Query_10009 | 2802 | KkdNRTDGER--NA[3]        | RLAVKKSQRDELMSRAKQAREN     | QVTMFRKYRSGELPDIQIKLEILRPLQSLCQMDHVVGT    | 2878                                          |      |
| Query_10010 | 2747 | Kp-----YS[4]             | KQMATAQRQDEIYRFSQHAFPK     | NIISMLRQYRVGELPDIGINHGDLINPLQTLAQRLDLSIR  | 2816                                          |      |
| Query_10011 | 2693 | NprATQSQVL-----[4]       | ----RASRRREARLKLQSLERAN    | KVHMMRQYRTGELPDIIEIKHADIVGPAALAEERDPTFAR  | 2764                                          |      |
| Query_10012 | 2670 | RrdDQKR--I-FHA           | SREIQRASARQBLEQERGRLEAN    | IASFREYRSGDFPDIIEISYSAIKPKMQLAKRDAAVAR    | 2742                                          |      |
| Query_10013 | 2737 | KskDKRAQAaIFHA           | KRMAARKQEARLIELRRKARAAQ    | VTLFRSYRTGELPDIQIKQRELLQPLQGLAQRPDQLAR    | 2812                                          |      |
| Query_10014 | 2659 | K--DKAESQSkFFA           | RKQIAKKNRDEDLRQLKAKREN     | HVEKYRNYRIGDFPDIQIKHSELIAPMQALAQRDSTIAM   | 2732                                          |      |
| Query_10015 | 2706 | KngDREKQSI-YFA           | KIEERRSKLRELEKERRFRREA     | QVTMYRQYRVGELPDVQIIPHRALIGPLQALSQRDEKVAR  | 2780                                          |      |
| Query_10016 | 2724 | K--DREKSRlhFT-           | RMEMRKQQLRERKEKQKQREG      | QVTIYRQYRIGDLPDIIEINYSYIIVPLQALAQHDDIEICR | 2796                                          |      |
| Query_10017 | 2756 | K--DKEMVSS-FFA           | MNEARKMRREELKQKRAARQSV     | VVMYRKYRMGELPDIQIKHSELIRPLQALAQNDSTGLAR   | 2828                                          |      |
| Query_10018 | 2731 | K--SEMANNA-FYA           | KRERKKQLREIELKQKQIAREN     | KVVMYRKYRDLGELPDIQIKHSELIAFPQALAQV--CYLD  | 2801                                          |      |
| Query_10019 | 2776 | K--DQSQISA-FFA           | KQALKRKNFREQALQRQAAREG     | AIVMYRKYRSGELPDIQIKYSELIAPLQALAQCDNTFAK   | 2848                                          |      |
| Query_10020 | 2618 | Q--DKYAMLK----           | -----KHDLAMTRERHQB         | HVRIKRAYRAGEFPDIQITQDDIVDPIMALCEVSVETSS   | 2678                                          |      |
| Query_10021 | 2899 | LqqQQQQAAA---S[28]       | QAGVERHRRQAREAAEAARKRE     | HVRTLRRRYRVGDLPDVQMEQCALVTTLAGLAQKDRMPGR  | 2999                                          |      |
| Query_10022 | 2768 | KrkGKADLAK-FFA[31]       | KQEBIRKMQREYQLRQRIQRQKH    | QVGLYRRYRVGELPDIQISYEDVLKPLQAITKSLDTTAT   | 2873                                          |      |
| Query_10001 | 2794 | LLFVAVFQAIFTQIESEKTER--  | ESQSLVAKIESSLNKILETSTQY    | F---SPFICGVLEIAYLFPKQL                    | KL                                            | 2858 |
| Query_10002 | 2865 | LLFSSLFRGIFSEIEEVKTER--  | EAESTKVEINRHLNMLSTSTQY     | F---PPFI SCVQEI SYIYHSEQL                 | TL                                            | 2929 |
| Query_10003 | 2850 | LLFSSLFRGIFFEIENVKTER--  | EAEDLTEQI SRLNLALSSEKY     | F---PPFTSSLQETCYREPRKL                    | SP                                            | 2914 |
| Query_10004 | 2807 | QLFSSSLFSGILKEMDKFKTSL-  | EKNNITQKLLQDFNRLNTTFSF     | F---PPFVSCIQDISCOQAALL                    | SL                                            | 2871 |
| Query_10005 | 2824 | QLFSALFSGILLEEVHKSKT-A-  | ETKDISKQLVENFNLLKATTLN     | F---PPFVACIQDMSCQHKDLL                    | GL                                            | 2887 |
| Query_10006 | 2773 | LLFSSLPKAIYKMDVEVKTER--  | EMETIELINTSVETMFNTSTQY     | F---PPFLSCIMDIYVVLRSRL                    | KI                                            | 2837 |
| Query_10007 | 2800 | MLFSALFRAIFSELQDVKTER--  | ETTEMMAQISRLNAMLDSSSTQY    | F---SPFI GCVENIYVYNSGRL                   | KL                                            | 2864 |
| Query_10008 | 2704 | ALFESLMCGVAANVIEIYNFEm-- | TEKYFDSISDGLRDIRFSMVTF     | H---RPLVSCLMNFLYNFIEYV                    | HF                                            | 2768 |
| Query_10009 | 2879 | SVFSLLFTTIIYQHCPRDQVNFk- | -----KSSCKQSIKIDSNATN      | -----SALILSLKIVKNELELT[1]--               |                                               | 2937 |
| Query_10010 | 2817 | TLFTSLFVSIYNQLDNNIQSE-   | EIKEYKTI GRHIQDIFSNSTMN    | F---PPFVGSCLRICYEVNDIE                    | -I                                            | 2880 |
| Query_10011 | 2765 | LLLRILCSAVYSLPSGGQDIKa   | -----EVRGLGLEAALRQTHNG[1]  | -----SFVGCABALCLEDPETW                    | -I                                            | 2821 |
| Query_10012 | 2743 | HLFVLLFDGLLGEL-----YD-   | EKEYVTQKVKAMGSI VSTTKDY    | T---TMVMGAVMEIALCHSRYI                    | TL                                            | 2802 |
| Query_10013 | 2813 | MVFESLFYCVLHELDPILSER--  | DAANMKAEYKNSLVNGLLQATRKG   | Y---TPFTI AALHNLMSRADPAI                  | -V                                            | 2876 |
| Query_10014 | 2733 | VLFSFIFVSLISEISYLKDEQ--  | DSYKILKELTQYLNAMLASSSEF    | N---SNFIACILEIKCNPKLL                     | KL                                            | 2797 |
| Query_10015 | 2781 | LLFEVLAQGVINSAGTAMHHR--  | EEQEWQNLHEALNGLLSSSYMC     | C---PQMLRTVLHLMINND--V                    | RT                                            | 2843 |
| Query_10016 | 2797 | MLFQSL---ILSVCCYMKSNQv   | tEYSEFCRSLSSALNEILKKSVMH   | H---PQLVAFCECLNCDVKEM                     | DI                                            | 2860 |
| Query_10017 | 2829 | LLFCSLFNSIFSQLDHLLTEE-   | DAATKGVIEGNINTILDCSTQY     | F---PPFI GSLQDICYENS-L                    | KI                                            | 2892 |
| Query_10018 | 2802 | QNYRYVNLV-NDLVENFNDE--   | DAETKAEIKASLSNIVKSKHY      | F---PPLIACVQDICYQKEL-                     | SI                                            | 2864 |
| Query_10019 | 2849 | QLFSALFRGIFSKIDEKLPFR--  | EAAVSTDLRSAMHMLSSSTQF      | F---PPFTSSIQDICFHEKCLR                    | SV                                            | 2913 |
| Query_10020 | 2679 | LLFDELFSIVA-----TNEf     | EKSGIVDELTEKIEGTLTSLKAS    | Sv----YVGCIVSYAVASMRH[8]-L                |                                               | 2744 |
| Query_10021 | 3000 | LLCAQLSQSMVDWAASALSED--  | DVADMCRLLAAAWGLIPTSFPF[13] | AtndPALIGCALDSLCAVASSA[9]DV[7]            |                                               | 3096 |
| Query_10022 | 2874 | EVFVEIFSELYKQNDQQQRE1-   | -----LGGQVRNINLESILY       | Dygc---INCIHRVAMELLKTD[2]TI               |                                               | 2933 |

Supplementary Figure 5: COBALT analysis DNA-PKcs from representative examples from all major phyla (short list)

|             |      |                                                        |                                                                                    |                                      |             |      |
|-------------|------|--------------------------------------------------------|------------------------------------------------------------------------------------|--------------------------------------|-------------|------|
| Query_10001 | 2859 | QPGVSVSTVCNMSDQQLGILLLE                                | EGLLHSP                                                                            | EDQS-P-ASKRRSRDRSSR--ITQDTEP         | WLELAKLYKS  | 2922 |
| Query_10002 | 2930 | VPSTISTASLTSQQMHIGIRLLE                                | ENLIQKP                                                                            | WQEE-K-SAKRARFV-SRE--PSPEIST         | WIELARLYKA  | 2992 |
| Query_10003 | 2915 | DASVIQQTGVISLQQPIGIVLLE                                | EQLVQKA                                                                            | GVEE-P-RSKRARTS-SSP--VSAEATAT        | WIELARLYKS  | 2977 |
| Query_10004 | 2872 | DPAAVASAGCLASLQQPVGIRLLE                               | EALLRLK                                                                            | P-AE-L-PAKRVRGKARLP--PD--VLR         | WVELAKLYRS  | 2932 |
| Query_10005 | 2888 | DSTSVRSTSLASLQQPMGILLLE                                | KSLIHST                                                                            | TNEE-P-PTKKARGRQELP--PPTDVAR         | WIELATLYRS  | 2951 |
| Query_10006 | 2865 | SFSNLSTCAIVSSLOPLGIVVLE                                | EQLIQTD                                                                            | STEQ-R-GNKRKRTE-GTT--VSTDVNL         | WIEMARLYKS  | 2900 |
| Query_10007 | 2838 | EPASAVDTASLISMQQPLGIVLLE                               | EQLIRDG                                                                            | SIER-R-PAKRARTS-ATV--PSQETST         | WIELARLYKS  | 2927 |
| Query_10008 | 2769 | EPTDIANVAIGSQDPCGIVLLE                                 | RRIVEFG                                                                            | VDISAV-TCQEKRLKQVNE-----DTRL         | WVELARLYKQ  | 2830 |
| Query_10009 | 2938 | SPASIASASNASGNHFMGIIIVIE [ 3 ]                         | ESLLPTK [ 1 ]                                                                      | -----SSKQYAQNQATIS----- [ 2 ]        | WDHLRELYHA  | 2996 |
| Query_10010 | 2881 | DPNMIRKACSLSTESLGIILIE                                 | RQLLRTS [ 1 ]                                                                      | ---ERE---SKRLRRTSSSLV---ASSKR [ 1 ]  | WIELSHLYKS  | 2942 |
| Query_10011 | 2822 | SPKIMGSARKSTNYHSGIMLLE                                 | KQIMNET [ 1 ]                                                                      | PEPEPNvSSKRQKGGQAn-----RL [ 7 ]      | WLELAELYKA  | 2891 |
| Query_10012 | 2803 | QAEDITTVSRFSGLLALGCLSLE                                | EILIQKD                                                                            | TVSEAG-SSKRSKTFEP-----STEEIL         | WLSLADLYKH  | 2864 |
| Query_10013 | 2877 | SPMTVSLTSAAGRSFHTGALLLE                                | STLAAAE                                                                            | EEAAMQ-PSKRSMRRARnglTDDTEIER         | WIYLGRLFPKE | 2943 |
| Query_10014 | 2798 | DPGLVTSACLNSFRSLGIIILE                                 | EYIINFE                                                                            | EDSDAP-LLEKKVRLNPKDS--SSEASIL        | WIELAKLYRS  | 2862 |
| Query_10015 | 2844 | NPESLTAACLGSRLEALGILVLE                                | RQALLSK                                                                            | RGEEPH-PARKKMRKDEAE--LQODDSL         | WLSIAEMYKN  | 2908 |
| Query_10016 | 2861 | DYEQICTASQASHKQSLGILLLE                                | DHLICYN                                                                            | NFKSSN-PAKRKIKLNKPLI--SDELSI-        | WLKMAEYKS   | 2924 |
| Query_10017 | 2893 | KPPSITTSSLASKQEFPTGIMLLE                               | KQLL-LN                                                                            | VDSS-K-SAKRSRTN--K--SNEVETP          | WIELARLYKS  | 2952 |
| Query_10018 | 2865 | QSSFASVASLASSQPIGILLLE                                 | KQIMHLD                                                                            | TEEP-P-S-KRIKTSASA---SEA-TSN         | WIELSKLYRS  | 2924 |
| Query_10019 | 2914 | DSASVSTACTLNSLQQPIGIMLLE                               | KQLLEIE                                                                            | GKSQ-N-SRKRKAKTSTVPP--SEV-TTC        | WIELSKLYRS  | 2976 |
| Query_10020 | 2745 | RPKTI GDAGLASGNHVSQLALE                                | ELLIYET                                                                            | QLMAGNm--KLSNESLTEC-----             | WDLHLKLLST  | 2802 |
| Query_10021 | 3097 | DYGLVAAAASAAHLPTL GALALE [ 11 ]                        | QQQRDE [ 11 ]                                                                      | TTQLPTAAKRRRMEAGSQe-SNDDNSA [ 14 ]   | WLALARLYRD  | 3199 |
| Query_10022 | 2934 | BANI I QRTGQHSMSFTALALLE [ 11 ]                        | EQQQAAM                                                                            | GKQGNKk--RKIQDMSGQN-----QKNGT [ 14 ] | WPNLIDLIDYQ | 3020 |
| Query_10001 | 2923 | ISDYDVLRGIF---S-SQIGS-KPATRLAIEAE                      | T-RGDYRSALQLYNES---LAKEE-WDDGehPTEAEI                                              | NMWD                                 | 2986        |      |
| Query_10002 | 2993 | LGDFDAVQGVF---S-ACIGT-HEITKTALAEAE                     | A-RGDYSTALKLYNQA---F-EMD-WDEGA-VSQVEE                                              | DLWD                                 | 3054        |      |
| Query_10003 | 2978 | LGDFDVLQGF---S-RKVG-TQVTYEALAEAE                       | A-RGDFKKAVELYNQA---MQTE-WDPDQ-PLAVEE                                               | DLWD                                 | 3040        |      |
| Query_10004 | 2933 | IGEYDVLRGIF---T-SEIGT-KQITQSALLAE                      | A-RSDYSEAAKQYDEA---LNKQD-WVDGE-PTEAEK                                              | DFWE                                 | 2995        |      |
| Query_10005 | 2952 | IGDYDVLRGIF---S-EKIGT-KPLTHTALLAE                      | A-KSDYAEAVRLYDQA---LNTEE-WMDGN-PMETEK                                              | DFWE                                 | 3014        |      |
| Query_10006 | 2901 | VENYDVLHGIF---S-GKIDT-KPITQEAAMAE                      | S-KGDYQTANKLYDEA---LSIQD-WAGED-PLAEAI                                              | DFWD                                 | 2963        |      |
| Query_10007 | 2928 | LGDFDVLRGIF---S-SKIGT-KKITQDAALEAE                     | S-RRDYKTASHLYREA---RQCDS-WTDGE-PDGLEQ                                              | ELWV                                 | 2990        |      |
| Query_10008 | 2831 | CGELENLKA V F---T-KHLLT-TEKTKLAEME                     | A-AGDFEGAATYIGET---FSNKQ-SKSGDI VEKABS                                             | NLLY                                 | 2894        |      |
| Query_10009 | 2997 | LKEEDIVLGLLE---RQMG-LPYTKRALEAE                        | -L SNDWVA VLKAYDDGmaaleSESG---LAI tPSARET                                          | SLWE                                 | 3061        |      |
| Query_10010 | 2943 | IDGHVYNSIYE---S-KIVV-SELTKDALNAE                       | -LIGDYALACKHYLEA---LKSEA-----GVDDEIV [ 1 ]                                         | LWE                                  | 3001        |      |
| Query_10011 | 2892 | LGENDIVLGLFg---T-HVAK-HEKTRRALEIQ                      | -LGGDLRQALDLYDQV ia--IYEDGSLSGD-ITKSEI                                             | DIWY                                 | 2956        |      |
| Query_10012 | 2865 | MDEWVVRGIF---H-KYVNC-GENVHKALKEE                       | T-SGHWDKARMEYEA---LSSMD---DQD-GLS---                                               | DYYY                                 | 2922        |      |
| Query_10013 | 2944 | IGDYDVLHGIF---S-NQVLS-FEATQARA L E                     | A-ARGFDEAAEVYKEC---MFKEEdEEDDD-VPACEV                                              | DLWE                                 | 3007        |      |
| Query_10014 | 2863 | MNDYDSIKGIF---LvKSDLV-CEHTERGIDFE                      | A-VNDYYSARNEYGAA---LDSE---LLEN-VSQSEQ                                              | DLWL                                 | 2924        |      |
| Query_10015 | 2909 | LNMWVVRGVV---Q-GKLGAIKEETQKALEAE                       | A-TNNHVRAFLLYRQS---LDTTD---WEEE-PLAAEN                                             | RLWE                                 | 2971        |      |
| Query_10016 | 2925 | LSDYDSVHGIF---S-NSLNI-QEETKQALEFE                      | S-RGEYLLAVKIYSKL---YDQTE-WSAEE-PNQAEI                                              | DLWD                                 | 2987        |      |
| Query_10017 | 2953 | LEDYDVLHGIF---T-NLDDT-KDVTRKALEAE                      | E-RGDYLTALNLYKKA---IDF-D-WPQGSPPQVEE                                               | DLWE                                 | 3015        |      |
| Query_10018 | 2925 | IGYDVLRGIF---S-GHLGT-KDITQRALEAE                       | S-RHDYAAAVKYYNQA---MDCSS-WPDGE-PQAEAE                                              | DLWE                                 | 2987        |      |
| Query_10019 | 2977 | VGDYDVLRGIF---T-GHIGT-KDITREAMEAE                      | A-RGDYSQALKLYNEA---IGTDDvWIKEE-LRQEEE                                              | DLWD                                 | 3040        |      |
| Query_10020 | 2803 | LHKRDFLVALSLacS-----T-NADSKRALQEQ                      | L-SGDLPLAIAAYKKAestLRLQMeLDDGdFVIARN [ 4 ]                                         | CRWQ                                 | 2873        |      |
| Query_10021 | 3200 | MGEPPDQLGALrrcRsrHNGQ--EGVDNDDDE [ 7 ]                 | ClSGDVQLALATFDRL---FRQAdesGTESaSAAADs [ 5 ]                                        | INACQ                                | 3280        |      |
| Query_10022 | 3021 | IGNDDALQGIWtflA-DEEGI---IFKVKDDQE                      | KLSQDQERTVNLIKEAhc-LRTKG--SIDKgLKVLEQ [ 1 ]                                        | LND                                  | 3087        |      |
| Query_10001 | 2987 | SSRIECAEN--LTQWRDVELTSTSDL-E-G                         | SS---LSAVWDSTYHQ---EVYLPPLMRSKIKLILN---GD-TSQDN                                    | 3049                                 |             |      |
| Query_10002 | 3055 | ESRLNCCNQ--LTQWKELQNYSTVNI-D-D                         | NSPHDLGKIWSDTFYQ---ELYLPMMRSMLKQLME---GG-EDE-T                                     | 3119                                 |             |      |
| Query_10003 | 3041 | DSRLQCYDH--LTQWKNLVEVSTVNI-D-E                         | DSPPNLDKMDDTYFQ---EHYLPPTIRSKLKLLE---GE-MDQ-S                                      | 3105                                 |             |      |
| Query_10004 | 2996 | LASLDCYNH--LAEWKSLCYCSTASI-D-S                         | ENPPDLNKI WSEPFYQ---ETYLPMYIRSKLKL L LQ---GE--ADQS                                 | 3060                                 |             |      |
| Query_10005 | 3015 | IAALECYNH--L TEWKAL EYCVSTVNI-D-D                      | KTPADIENTI WSDTFYQ---ETYL SYMIRSKVKLLQS---GE--VDQS                                 | 3079                                 |             |      |
| Query_10006 | 2964 | DSRMQCLDH--LTQWKDLETVCLTAI-D-N                         | TELPNLK V WEDTLYQ---EHYLPYIIRSKLKL L L L---GG--DQQS                                | 3028                                 |             |      |
| Query_10007 | 2991 | DAYLLCVDQ--LMSWEELGTEAMDCI-E-G                         | LEETGLNKI WEDAYYQ---EHYLPYIIRSKVKLL L LQ---GN-EDQQ                                 | 3056                                 |             |      |
| Query_10008 | 2895 | EARTRCLEM--LNDWKLETWSTTFS--as [ 1 ]                    | -KTAKL NQIWETDYLI---NMHLPVFLRSK L K IAL T---SDsAALEE                               | 2961                                 |             |      |
| Query_10009 | 3062 | NGRLQCYES--LREWSNLKANFIAYY--p [ 2 ]                    | -----QSVFEEQDEA-tRHEMMSHFLOYSLKVKENw-----PD                                        | 3121                                 |             |      |
| Query_10010 | 3002 | ERRFDCFEK--LCQWDDLAETVLVDI---                          | --EDNLSNLWEDELQD i---YLQHFVHSFPKLSLSddnSE---YRQR                                   | 3064                                 |             |      |
| Query_10011 | 2957 | NQRLACLAD--LNEWVLMGEIEYESmEgD                          | NSEPDFKRLWEPTKQE i---YLG YFIRGAVKEAKYh---GL-----                                   | 3019                                 |             |      |
| Query_10012 | 2923 | EALYKCLAH--LSDWKGLNQQVRRQV----                         | --ENNLDLQWTDWLQ---EKL L P Q I L L S E I Q M M L D---kG---VDSK                      | 2983                                 |             |      |
| Query_10013 | 3008 | ETLAECSLR--LCDWGELENTLTICI-Np [ 9 ]                    | IAEVIDANNI WQPRLI---QRHLP H I T V R L E L G I S a-----VVCAC                        | 3082                                 |             |      |
| Query_10014 | 2925 | ESLLKCCNE--LTDWKAM-----C-EwS                           | MNGNTLDQLFEDAYS I---ENVPYAFRSK L K L I L Q e d e N e q K K H K D                   | 2988                                 |             |      |
| Query_10015 | 2972 | EWYSNCAAI--LGQWSELENFVEKRFLQdD                         | DGEVLDNRVLLPKPT---ATALPALVHSK L M N I L D---gSE--TDGN                              | 3039                                 |             |      |
| Query_10016 | 2988 | NAI L Q C Y D Y --L T Q W D L L Q L S I I N R L -D e N | QKQP N L N K I W E E P Y Y Q ---E N Y L P F L I K S K L K L L I ---E n R n D Q S   | 3053                                 |             |      |
| Query_10017 | 3016 | DSLNLAYSH--LTKWKDLEKASTCNI-G-E                         | ETNSKLEQLWKDSYCYQ---EHYLPVLSKSLK L W C T ---D D---SDHG                             | 3080                                 |             |      |
| Query_10018 | 2988 | ISRLCCLYN--LTKWDKLEYLSLVNV-D-N                         | NDPPSFDKI WEDNY Y Q ---E N Y L P L F L K S K A K V M C E ---N D L A G S D D        | 3054                                 |             |      |
| Query_10019 | 3041 | VSRLQCLAD--LTKWKELEKCSVESI-D-D                         | KNPPDLK V W S D T F Y Q ---E H Y L P H I T S K L K L Q C Q ---G---SGDMT            | 3105                                 |             |      |
| Query_10020 | 2874 | --RLNCMET--LNSWHALNSEITEAA---N [ 1 ]                   | ---DTNLYWKORPPY---LEQGVGHYLRSC L G L L E A s p s N D ---L L E S                    | 2936                                 |             |      |
| Query_10021 | 3281 | LARLDCLTR--LADWSRLSGVSKLL1TpA [ 8 ]                    | -----ADRLWSRVGVQnvcRNALSSYMLSSRTLRVCDkpeSAiGSDSE                                   | 3358                                 |             |      |
| Query_10022 | 3088 | KSLTDCLEDhiLCELENKQLDSKAEL1Kwd [ 2 ]                   | ---AKDMSEK Y H S K Q L S e i p F K H A E K M I R A Q I R T D P E Y w-----N N L T K | 3159                                 |             |      |

Supplementary Figure 5: COBAL analysis DNA-PKcs from representative examples from all major phyla (short list)

|             |      |                                                                                                                                                                                                                                                                                                                                                                                                                                                                                                                                                                                                                                                                                                                                          |                                                                                                                                                                                                                                                                                                                                |      |
|-------------|------|------------------------------------------------------------------------------------------------------------------------------------------------------------------------------------------------------------------------------------------------------------------------------------------------------------------------------------------------------------------------------------------------------------------------------------------------------------------------------------------------------------------------------------------------------------------------------------------------------------------------------------------------------------------------------------------------------------------------------------------|--------------------------------------------------------------------------------------------------------------------------------------------------------------------------------------------------------------------------------------------------------------------------------------------------------------------------------|------|
| Query_10001 | 3050 | LLSF---IEESLKT <sup>1</sup> PVHKAFIEG <sup>2</sup> SFSE <sup>3</sup> ELALVCIH                                                                                                                                                                                                                                                                                                                                                                                                                                                                                                                                                                                                                                                            | QELYDKAKHYANMSLQAFIQD <sup>4</sup> WANLSTTRTSTRA--TKLQKL                                                                                                                                                                                                                                                                       | 3121 |
| Query_10002 | 3120 | LLQF---IDASMSDAD-----KRAFLEARYSE                                                                                                                                                                                                                                                                                                                                                                                                                                                                                                                                                                                                                                                                                                         | QEDYDRAMFYLANCRQSF <sup>5</sup> LHDW <sup>6</sup> SGLG <sup>7</sup> PLMISSRR--AKLQCI                                                                                                                                                                                                                                           | 3191 |
| Query_10003 | 3106 | LLNF---VDSAMQK <sup>8</sup> PKDRKALLESRYCE <sup>9</sup> ELAML <sup>10</sup> YL                                                                                                                                                                                                                                                                                                                                                                                                                                                                                                                                                                                                                                                           | QDDYGRAKYV <sup>11</sup> GNCTDA <sup>12</sup> FLQEW <sup>13</sup> SGMDRLMTSSRA--AKLQSV                                                                                                                                                                                                                                         | 3177 |
| Query_10004 | 3061 | LLTF---IDKAMHGELQKAI <sup>14</sup> LELHYSQ <sup>15</sup> ELSLYL                                                                                                                                                                                                                                                                                                                                                                                                                                                                                                                                                                                                                                                                          | QDDVDRAKYI <sup>16</sup> QNGIQS <sup>17</sup> FMQNYSSIDVLLHQ <sup>18</sup> SRL--TKLQSV                                                                                                                                                                                                                                         | 3132 |
| Query_10005 | 3080 | LLTF---VDRAMKVEQ <sup>19</sup> KAVLE <sup>20</sup> TYYSQ <sup>21</sup> ELSLYL                                                                                                                                                                                                                                                                                                                                                                                                                                                                                                                                                                                                                                                            | QDDVDRAKYI <sup>22</sup> INNCMEV <sup>23</sup> FMQNYSSIDVLLHQ <sup>24</sup> SRL--TKLQSV                                                                                                                                                                                                                                        | 3151 |
| Query_10006 | 3029 | LLTF---VDTSMKTTEY <sup>25</sup> RAVLESRY <sup>26</sup> MELSLMYLW                                                                                                                                                                                                                                                                                                                                                                                                                                                                                                                                                                                                                                                                         | QDNYDRARHYANLALQKFLQ <sup>27</sup> DWSSTDTLIVASRT--SQLQTL                                                                                                                                                                                                                                                                      | 3100 |
| Query_10007 | 3057 | MLDF---VDNMMNVEEQ <sup>28</sup> KIFLEARYSEELALYL <sup>29</sup> FL                                                                                                                                                                                                                                                                                                                                                                                                                                                                                                                                                                                                                                                                        | QEDYARARHYTSIV <sup>30</sup> KTF <sup>31</sup> LQD <sup>32</sup> WGSIDTLM <sup>33</sup> TTRI--GKLOIL                                                                                                                                                                                                                           | 3128 |
| Query_10008 | 2962 | LSAF---VEQNTVPK <sup>34</sup> NREILEN <sup>35</sup> RHSG <sup>36</sup> LVLN <sup>37</sup> LIL                                                                                                                                                                                                                                                                                                                                                                                                                                                                                                                                                                                                                                            | REDFTKSQY <sup>38</sup> FLNVA <sup>39</sup> IDS <sup>40</sup> FLKCY <sup>41</sup> PTLRVCDV <sup>42</sup> TARL--KLVDL                                                                                                                                                                                                           | 3033 |
| Query_10009 | 3122 | LYQFm---GSLTPSQ <sup>43</sup> HQYMESS <sup>44</sup> FPGL <sup>45</sup> EALF <sup>46</sup> IT                                                                                                                                                                                                                                                                                                                                                                                                                                                                                                                                                                                                                                             | RSDFNRSQY <sup>47</sup> YIQ <sup>48</sup> KFYRL <sup>49</sup> FRD <sup>50</sup> WASTHPLALASRHf--ILQPI                                                                                                                                                                                                                          | 3191 |
| Query_10010 | 3065 | FFDF---IDGAMNNOY <sup>51</sup> QKSLT <sup>52</sup> TQY <sup>53</sup> PELEALS <sup>54</sup> SVT                                                                                                                                                                                                                                                                                                                                                                                                                                                                                                                                                                                                                                           | KKDLEQGRFY <sup>55</sup> V <sup>56</sup> RKAFD <sup>57</sup> N <sup>58</sup> FLF <sup>59</sup> AWSTLHPLAIG <sup>60</sup> TRL--GKLSL                                                                                                                                                                                            | 3136 |
| Query_10011 | 3020 | LTEF---VQSSSEILPK <sup>61</sup> RQFL <sup>62</sup> LN <sup>63</sup> EFST <sup>64</sup> QLATLAAI                                                                                                                                                                                                                                                                                                                                                                                                                                                                                                                                                                                                                                          | NKEWDRARFY <sup>65</sup> LQ <sup>66</sup> CHLI <sup>67</sup> FR <sup>68</sup> QWSALHPFALG <sup>69</sup> SRH--QVRVQL                                                                                                                                                                                                            | 3091 |
| Query_10012 | 2984 | REQFlqqVDRWLRDRD <sup>70</sup> KSDY <sup>71</sup> LSSH <sup>72</sup> YCEELAAIFLI                                                                                                                                                                                                                                                                                                                                                                                                                                                                                                                                                                                                                                                         | QDKLDQAQH <sup>73</sup> QVEHSL <sup>74</sup> TM <sup>75</sup> FLDSWAALNPSSHN <sup>76</sup> LRT--KQLLDL                                                                                                                                                                                                                         | 3058 |
| Query_10013 | 3083 | LQAF---VEAARPHDDRWAH <sup>77</sup> LQYH <sup>78</sup> FAMELAML <sup>79</sup> SVL                                                                                                                                                                                                                                                                                                                                                                                                                                                                                                                                                                                                                                                         | REDFDLAR <sup>80</sup> YHL <sup>81</sup> SQLQR <sup>82</sup> FLDD <sup>83</sup> WT <sup>84</sup> LSPLMT <sup>85</sup> TERR--ASLQRL                                                                                                                                                                                             | 3154 |
| Query_10014 | 2989 | LIRF---INGL---EVEKKY <sup>86</sup> LEQ <sup>87</sup> SFCQ <sup>88</sup> EALF <sup>89</sup> LSLH                                                                                                                                                                                                                                                                                                                                                                                                                                                                                                                                                                                                                                          | QNDSAANYYAHLA <sup>90</sup> IQ <sup>91</sup> KYL <sup>92</sup> TEW <sup>93</sup> SSTNKTI <sup>94</sup> KONQI--NKLQSL                                                                                                                                                                                                           | 3058 |
| Query_10015 | 3040 | LIAF---IDQSMGDHRH <sup>95</sup> RSML <sup>96</sup> EGL <sup>97</sup> PLQL <sup>98</sup> GVLA <sup>99</sup> AH                                                                                                                                                                                                                                                                                                                                                                                                                                                                                                                                                                                                                            | QEKFEQANVY <sup>100</sup> ANTAT <sup>101</sup> SM <sup>102</sup> TL <sup>103</sup> LSQ <sup>104</sup> SVL <sup>105</sup> TPN <sup>106</sup> PLL--DTLQNV                                                                                                                                                                        | 3111 |
| Query_10016 | 3054 | LLCF---IDSALKEEN <sup>107</sup> KKYLEEN <sup>108</sup> FSEELALLYII                                                                                                                                                                                                                                                                                                                                                                                                                                                                                                                                                                                                                                                                       | QENYDRAQYYS <sup>109</sup> QLC <sup>110</sup> LQ <sup>111</sup> DF <sup>112</sup> LKEW <sup>113</sup> S <sup>114</sup> SLN <sup>115</sup> VLM <sup>116</sup> PI <sup>117</sup> IRK--TKLQSL                                                                                                                                     | 3125 |
| Query_10017 | 3081 | LASF---LDKLSLSEAN <sup>118</sup> RSVLESH <sup>119</sup> YQ <sup>120</sup> E <sup>121</sup> FL <sup>122</sup> SVL                                                                                                                                                                                                                                                                                                                                                                                                                                                                                                                                                                                                                         | RDDYDRAYYL <sup>123</sup> SL <sup>124</sup> SLKAK <sup>125</sup> Q <sup>126</sup> QI <sup>127</sup> VS <sup>128</sup> VDG <sup>129</sup> ISS <sup>130</sup> TGA <sup>131</sup> vs <sup>132</sup> TVQ <sup>133</sup> SL                                                                                                         | 3154 |
| Query_10018 | 3055 | FIQY---LNKSLANDE <sup>134</sup> HLSVLE <sup>135</sup> NRH <sup>136</sup> C <sup>137</sup> DCLAL <sup>138</sup> HVL                                                                                                                                                                                                                                                                                                                                                                                                                                                                                                                                                                                                                       | LEKYDRAR <sup>139</sup> Y <sup>140</sup> LD <sup>141</sup> FS <sup>142</sup> I <sup>143</sup> Q <sup>144</sup> FLQ <sup>145</sup> D <sup>146</sup> W <sup>147</sup> SALD <sup>148</sup> STLL <sup>149</sup> YSRA--SKLQSL                                                                                                       | 3126 |
| Query_10019 | 3106 | LN <sup>150</sup> EF---VAKAMK <sup>151</sup> T <sup>152</sup> SE <sup>153</sup> RAAL <sup>154</sup> RS <sup>155</sup> Y <sup>156</sup> SD <sup>157</sup> SLAL <sup>158</sup> MYL                                                                                                                                                                                                                                                                                                                                                                                                                                                                                                                                                         | QDNCD <sup>159</sup> S <sup>160</sup> Y <sup>161</sup> AA <sup>162</sup> L <sup>163</sup> SE <sup>164</sup> QS <sup>165</sup> FL <sup>166</sup> SD <sup>167</sup> WAG <sup>168</sup> LD <sup>169</sup> SN <sup>170</sup> LR <sup>171</sup> SRS--IKLQSL                                                                         | 3177 |
| Query_10020 | 2937 | LQNF---IGDAV <sup>172</sup> RS <sup>173</sup> AKV <sup>174</sup> KL <sup>175</sup> IQ <sup>176</sup> SK <sup>177</sup> F <sup>178</sup> VEL <sup>179</sup> CLAY <sup>180</sup> LA                                                                                                                                                                                                                                                                                                                                                                                                                                                                                                                                                        | [2]--DKNQ <sup>181</sup> TR <sup>182</sup> VC <sup>183</sup> VEN <sup>184</sup> F <sup>185</sup> Y <sup>186</sup> LN <sup>187</sup> FL <sup>188</sup> K <sup>189</sup> I <sup>190</sup> WR <sup>191</sup> Q <sup>192</sup> T <sup>193</sup> SP <sup>194</sup> MAT <sup>195</sup> IS <sup>196</sup> RM--ELLQSL                  | 3008 |
| Query_10021 | 3359 | SAEF <sup>197</sup> m <sup>198</sup> d <sup>199</sup> f <sup>200</sup> LR <sup>201</sup> CT <sup>202</sup> TD <sup>203</sup> ND <sup>204</sup> SV <sup>205</sup> RT <sup>206</sup> Q <sup>207</sup> PE <sup>208</sup> SE <sup>209</sup> HA <sup>210</sup> LLAS <sup>211</sup> VLI <sup>212</sup> K                                                                                                                                                                                                                                                                                                                                                                                                                                       | [2]--KYHN <sup>213</sup> AMAY <sup>214</sup> V <sup>215</sup> DS <sup>216</sup> AL <sup>217</sup> DR <sup>218</sup> V <sup>219</sup> L <sup>220</sup> NN <sup>221</sup> V <sup>222</sup> SS <sup>223</sup> PA <sup>224</sup> LQ <sup>225</sup> RQ <sup>226</sup> F <sup>227</sup> HL--LNMASV                                   | 3433 |
| Query_10022 | 3160 | QIAFw-----Q <sup>228</sup> RD <sup>229</sup> V <sup>230</sup> SKAY <sup>231</sup> LD <sup>232</sup> KN <sup>233</sup> F <sup>234</sup> YEL <sup>235</sup> AN <sup>236</sup> SL <sup>237</sup> T                                                                                                                                                                                                                                                                                                                                                                                                                                                                                                                                          | [1]--KD <sup>238</sup> Y <sup>239</sup> DRAR <sup>240</sup> F <sup>241</sup> YL <sup>242</sup> DK <sup>243</sup> ET <sup>244</sup> N <sup>245</sup> EL <sup>246</sup> LS <sup>247</sup> Q <sup>248</sup> W <sup>249</sup> KN <sup>250</sup> L <sup>251</sup> TK <sup>252</sup> LS <sup>253</sup> QVA <sup>254</sup> QHf--LVQRI | 3228 |
| Query_10001 | 3122 | QBFTEMQEFLSVIKTTS--GEDFPRQ--IDRTLHKWEARSPDRLLDSVVIW <sup>255</sup> DNII <sup>256</sup> LN <sup>257</sup> RNV <sup>258</sup> YMD <sup>259</sup> HFAEHL----                                                                                                                                                                                                                                                                                                                                                                                                                                                                                                                                                                                | ----                                                                                                                                                                                                                                                                                                                           | 3186 |
| Query_10002 | 3192 | QRLTEKQNF <sup>260</sup> LKLA <sup>261</sup> KIPD--LQEAIGCq <sup>262</sup> ks <sup>263</sup> LE <sup>264</sup> LLDR <sup>265</sup> WG <sup>266</sup> CH <sup>267</sup> LD <sup>268</sup> SK <sup>269</sup> KDP <sup>270</sup> INI <sup>271</sup> W <sup>272</sup> DD <sup>273</sup> V <sup>274</sup> SN <sup>275</sup> RL <sup>276</sup> LY <sup>277</sup> MD <sup>278</sup> KL <sup>279</sup> GSR <sup>280</sup> FIRSE                                                                                                                                                                                                                                                                                                                  | SQQA                                                                                                                                                                                                                                                                                                                           | 3266 |
| Query_10003 | 3178 | QKLFTEMQEFLLELISNDR--NFETPW--p <sup>281</sup> V <sup>282</sup> TR <sup>283</sup> LE <sup>284</sup> E <sup>285</sup> K <sup>286</sup> WS <sup>287</sup> SR <sup>288</sup> Y <sup>289</sup> PD <sup>290</sup> N <sup>291</sup> RM <sup>292</sup> DP <sup>293</sup> IS <sup>294</sup> V <sup>295</sup> W <sup>296</sup> DDI <sup>297</sup> AN <sup>298</sup> CL <sup>299</sup> Y <sup>300</sup> LD <sup>301</sup> KL <sup>302</sup> ND <sup>303</sup> KE <sup>304</sup> FQMA                                                                                                                                                                                                                                                                | ARGV                                                                                                                                                                                                                                                                                                                           | 3250 |
| Query_10004 | 3133 | QALTEIQEFISFISKQG--NLSSQVP--LKRLLNTW <sup>305</sup> TN <sup>306</sup> RY <sup>307</sup> PD <sup>308</sup> AK <sup>309</sup> MD <sup>310</sup> PM <sup>311</sup> NI <sup>312</sup> W <sup>313</sup> DDI <sup>314</sup> T <sup>315</sup> N <sup>316</sup> RC <sup>317</sup> F <sup>318</sup> FL <sup>319</sup> SK <sup>320</sup> IE <sup>321</sup> E <sup>322</sup> K <sup>323</sup> L <sup>324</sup> PLP                                                                                                                                                                                                                                                                                                                                  | [12]P <sup>325</sup> SDR                                                                                                                                                                                                                                                                                                       | 3217 |
| Query_10005 | 3152 | QAVTEMQDFLHFI <sup>326</sup> SK <sup>327</sup> EY--NFISEVP--LR <sup>328</sup> KL <sup>329</sup> RT <sup>330</sup> W <sup>331</sup> T <sup>332</sup> GR <sup>333</sup> Y <sup>334</sup> PD <sup>335</sup> AK <sup>336</sup> MD <sup>337</sup> PM <sup>338</sup> SI <sup>339</sup> W <sup>340</sup> DD <sup>341</sup> VI <sup>342</sup> T <sup>343</sup> N <sup>344</sup> RC <sup>345</sup> F <sup>346</sup> FL <sup>347</sup> DK <sup>348</sup> I <sup>349</sup> Q <sup>350</sup> ER <sup>351</sup> LV <sup>352</sup> SQ                                                                                                                                                                                                                  | [1]V <sup>353</sup> ETR                                                                                                                                                                                                                                                                                                        | 3236 |
| Query_10006 | 3101 | QPLVELHEFLTYI <sup>354</sup> SNEN--DITHT--T--AN <sup>355</sup> QL <sup>356</sup> LL <sup>357</sup> AK <sup>358</sup> WR <sup>359</sup> Q <sup>360</sup> PH <sup>361</sup> KL <sup>362</sup> DP <sup>363</sup> VNI <sup>364</sup> W <sup>365</sup> DD <sup>366</sup> VI <sup>367</sup> S <sup>368</sup> Q <sup>369</sup> RV <sup>370</sup> Y <sup>371</sup> LD <sup>372</sup> HS <sup>373</sup> QCL--AG                                                                                                                                                                                                                                                                                                                                   | KNKE                                                                                                                                                                                                                                                                                                                           | 3170 |
| Query_10007 | 3129 | QKLFTEMQEFLDFVSNED--TFQDSQA--ALS <sup>374</sup> LV <sup>375</sup> TR <sup>376</sup> W <sup>377</sup> Q <sup>378</sup> TR <sup>379</sup> SP <sup>380</sup> PI <sup>381</sup> VE <sup>382</sup> PC <sup>383</sup> NI <sup>384</sup> W <sup>385</sup> DD <sup>386</sup> IV <sup>387</sup> T <sup>388</sup> N <sup>389</sup> RC <sup>390</sup> LY <sup>391</sup> VD <sup>392</sup> QL <sup>393</sup> CHKL--SS                                                                                                                                                                                                                                                                                                                                | VQ--                                                                                                                                                                                                                                                                                                                           | 3197 |
| Query_10008 | 3034 | L <sup>394</sup> PV <sup>395</sup> SE <sup>396</sup> TAK <sup>397</sup> F <sup>398</sup> L <sup>399</sup> H <sup>400</sup> L <sup>401</sup> H <sup>402</sup> ASE--HLKLESV--V <sup>403</sup> RL <sup>404</sup> CR <sup>405</sup> F <sup>406</sup> W <sup>407</sup> LR <sup>408</sup> Y <sup>409</sup> GL <sup>410</sup> D <sup>411</sup> VE <sup>412</sup> T <sup>413</sup> LT <sup>414</sup> T <sup>415</sup> ADD <sup>416</sup> V <sup>417</sup> V <sup>418</sup> NR <sup>419</sup> KT <sup>420</sup> F <sup>421</sup> LEM <sup>422</sup> FG <sup>423</sup> K <sup>424</sup> GL <sup>425</sup> V <sup>426</sup> DSG                                                                                                                     | [1]----                                                                                                                                                                                                                                                                                                                        | 3102 |
| Query_10009 | 3192 | QKVVEVEEFLGLVTNDK--RAIEVdk <sup>427</sup> ME <sup>428</sup> KL <sup>429</sup> VL <sup>430</sup> WK <sup>431</sup> TR <sup>432</sup> Y <sup>433</sup> PSS <sup>434</sup> F--DD <sup>435</sup> IL <sup>436</sup> V <sup>437</sup> W <sup>438</sup> DD <sup>439</sup> LV <sup>440</sup> S <sup>441</sup> FR <sup>442</sup> S <sup>443</sup> V <sup>444</sup> LE <sup>445</sup> KI <sup>446</sup> YER <sup>447</sup> FIG <sup>448</sup> Q                                                                                                                                                                                                                                                                                                    | [1]----                                                                                                                                                                                                                                                                                                                        | 3260 |
| Query_10010 | 3137 | Q <sup>449</sup> VI <sup>450</sup> VE <sup>451</sup> E <sup>452</sup> EF <sup>453</sup> LN <sup>454</sup> L <sup>455</sup> Q <sup>456</sup> SS-----K <sup>457</sup> d <sup>458</sup> q <sup>459</sup> I <sup>460</sup> W <sup>461</sup> D <sup>462</sup> S <sup>463</sup> M <sup>464</sup> I <sup>465</sup> SH <sup>466</sup> ERR <sup>467</sup> F <sup>468</sup> PS <sup>469</sup> KT <sup>470</sup> LD <sup>471</sup> SS <sup>472</sup> NT <sup>473</sup> W <sup>474</sup> DD <sup>475</sup> IV <sup>476</sup> T <sup>477</sup> TR <sup>478</sup> QS <sup>479</sup> IL <sup>480</sup> KE <sup>481</sup> MA <sup>482</sup> ER <sup>483</sup> IK <sup>484</sup> LN <sup>485</sup> R                                                      | ----                                                                                                                                                                                                                                                                                                                           | 3202 |
| Query_10011 | 3092 | Q <sup>486</sup> KI <sup>487</sup> VE <sup>488</sup> LE <sup>489</sup> EE <sup>490</sup> FF <sup>491</sup> TI <sup>492</sup> SK <sup>493</sup> PE-----A <sup>494</sup> ge <sup>495</sup> LS <sup>496</sup> RL <sup>497</sup> SG <sup>498</sup> WH <sup>499</sup> K <sup>500</sup> WR <sup>501</sup> PS <sup>502</sup> PN <sup>503</sup> F <sup>504</sup> DD <sup>505</sup> VEA <sup>506</sup> W <sup>507</sup> DD <sup>508</sup> IA <sup>509</sup> NR <sup>510</sup> LL <sup>511</sup> FL <sup>512</sup> KY <sup>513</sup> Q <sup>514</sup> EH <sup>515</sup> FN <sup>516</sup> NP                                                                                                                                                       | --QRN                                                                                                                                                                                                                                                                                                                          | 3159 |
| Query_10012 | 3059 | Q <sup>517</sup> KT <sup>518</sup> A <sup>519</sup> EL <sup>520</sup> K <sup>521</sup> AC <sup>522</sup> L <sup>523</sup> AF <sup>524</sup> AT <sup>525</sup> NGE--HS <sup>526</sup> Q <sup>527</sup> ELL--AK <sup>528</sup> EL <sup>529</sup> V <sup>530</sup> K <sup>531</sup> RV <sup>532</sup> KN <sup>533</sup> V <sup>534</sup> PS <sup>535</sup> AF--DS <sup>536</sup> LL <sup>537</sup> R <sup>538</sup> W <sup>539</sup> DI <sup>540</sup> RAM <sup>541</sup> Y <sup>542</sup> R <sup>543</sup> KK <sup>544</sup> F <sup>545</sup> T <sup>546</sup> NR <sup>547</sup> ID <sup>548</sup> Q <sup>549</sup> ML--EN                                                                                                                 | ----                                                                                                                                                                                                                                                                                                                           | 3124 |
| Query_10013 | 3155 | Q <sup>550</sup> CM <sup>551</sup> VE <sup>552</sup> L <sup>553</sup> QE <sup>554</sup> FL <sup>555</sup> DF <sup>556</sup> V <sup>557</sup> Q <sup>558</sup> ET--NL <sup>559</sup> AS <sup>560</sup> ETS--V <sup>561</sup> N <sup>562</sup> LL <sup>563</sup> SS <sup>564</sup> W <sup>565</sup> SK <sup>566</sup> RT <sup>567</sup> PT <sup>568</sup> Y <sup>569</sup> K <sup>570</sup> DP <sup>571</sup> I <sup>572</sup> H <sup>573</sup> V <sup>574</sup> W <sup>575</sup> DE <sup>576</sup> VT <sup>577</sup> I <sup>578</sup> FR <sup>579</sup> RV <sup>580</sup> F <sup>581</sup> SK <sup>582</sup> I <sup>583</sup> H <sup>584</sup> CG <sup>585</sup> Y <sup>586</sup> R <sup>587</sup> PR                                     | [1]GAKA                                                                                                                                                                                                                                                                                                                        | 3228 |
| Query_10014 | 3059 | Q <sup>588</sup> SIV <sup>589</sup> EL <sup>590</sup> N <sup>591</sup> EF <sup>592</sup> L <sup>593</sup> K <sup>594</sup> F <sup>595</sup> INS <sup>596</sup> NQ--A <sup>597</sup> FT <sup>598</sup> V <sup>599</sup> N <sup>600</sup> L <sup>601</sup> ak <sup>602</sup> ID <sup>603</sup> N <sup>604</sup> L <sup>605</sup> IV <sup>606</sup> W <sup>607</sup> T <sup>608</sup> DS <sup>609</sup> MP <sup>610</sup> N <sup>611</sup> M <sup>612</sup> Q <sup>613</sup> T <sup>614</sup> DP <sup>615</sup> PCT <sup>616</sup> W <sup>617</sup> DD <sup>618</sup> VI <sup>619</sup> T <sup>620</sup> NR <sup>621</sup> S <sup>622</sup> IF <sup>623</sup> FE <sup>624</sup> IE <sup>625</sup> E <sup>626</sup> K <sup>627</sup> YL--    | [10]STTF                                                                                                                                                                                                                                                                                                                       | 3240 |
| Query_10015 | 3112 | Q <sup>628</sup> LL <sup>629</sup> TE <sup>630</sup> LS <sup>631</sup> DC <sup>632</sup> L <sup>633</sup> NN <sup>634</sup> V <sup>635</sup> K <sup>636</sup> YAD--R <sup>637</sup> DF <sup>638</sup> YSSK--V <sup>639</sup> Q <sup>640</sup> T <sup>641</sup> V <sup>642</sup> TS <sup>643</sup> WK <sup>644</sup> K <sup>645</sup> CR <sup>646</sup> ID--DN <sup>647</sup> PL <sup>648</sup> M <sup>649</sup> T <sup>650</sup> Q <sup>651</sup> CL <sup>652</sup> AS <sup>653</sup> Y <sup>654</sup> RD <sup>655</sup> LY <sup>656</sup> L <sup>657</sup> HL <sup>658</sup> ME <sup>659</sup> KK <sup>660</sup> L <sup>661</sup> PEDS                                                                                                  | ----                                                                                                                                                                                                                                                                                                                           | 3179 |
| Query_10016 | 3126 | Q <sup>662</sup> K <sup>663</sup> H <sup>664</sup> EL <sup>665</sup> QE <sup>666</sup> FL <sup>667</sup> N <sup>668</sup> F <sup>669</sup> ID <sup>670</sup> TYR--NID--E <sup>671</sup> yh <sup>672</sup> F <sup>673</sup> KN <sup>674</sup> L <sup>675</sup> TR <sup>676</sup> WL <sup>677</sup> K <sup>678</sup> RY <sup>679</sup> PD <sup>680</sup> IF--DS <sup>681</sup> VNI <sup>682</sup> W <sup>683</sup> DDI <sup>684</sup> IM <sup>685</sup> NR <sup>686</sup> SL <sup>687</sup> Y <sup>688</sup> ME <sup>689</sup> KI <sup>690</sup> V <sup>691</sup> SK <sup>692</sup> LQ <sup>693</sup> ETN                                                                                                                                  | [11]MDTS                                                                                                                                                                                                                                                                                                                       | 3207 |
| Query_10017 | 3155 | Q <sup>694</sup> RL <sup>695</sup> TE <sup>696</sup> M <sup>697</sup> NE <sup>698</sup> FI <sup>699</sup> TF <sup>700</sup> M <sup>701</sup> KS <sup>702</sup> ND--NF <sup>703</sup> SS <sup>704</sup> GP--V <sup>705</sup> N <sup>706</sup> LL <sup>707</sup> R <sup>708</sup> K <sup>709</sup> WR <sup>710</sup> K <sup>711</sup> FP <sup>712</sup> PK <sup>713</sup> LD <sup>714</sup> P <sup>715</sup> VI <sup>716</sup> W <sup>717</sup> DDI <sup>718</sup> I <sup>719</sup> T <sup>720</sup> FR <sup>721</sup> W <sup>722</sup> M <sup>723</sup> L <sup>724</sup> R <sup>725</sup> KI <sup>726</sup> ST <sup>727</sup> KL <sup>728</sup> Q <sup>729</sup> SV                                                                       | [4]CEYL                                                                                                                                                                                                                                                                                                                        | 3231 |
| Query_10018 | 3127 | Q <sup>730</sup> TL <sup>731</sup> TE <sup>732</sup> M <sup>733</sup> QE <sup>734</sup> FL <sup>735</sup> Q <sup>736</sup> F <sup>737</sup> M <sup>738</sup> DD <sup>739</sup> GR--NF <sup>740</sup> ES <sup>741</sup> VP--V <sup>742</sup> LS <sup>743</sup> LI <sup>744</sup> SK <sup>745</sup> W <sup>746</sup> STR <sup>747</sup> F <sup>748</sup> P <sup>749</sup> NE <sup>750</sup> VID <sup>751</sup> PI <sup>752</sup> N <sup>753</sup> V <sup>754</sup> W <sup>755</sup> DD <sup>756</sup> VI <sup>757</sup> N <sup>758</sup> RC <sup>759</sup> M <sup>760</sup> Y <sup>761</sup> LR <sup>762</sup> KL <sup>763</sup> LL <sup>764</sup> Q <sup>765</sup> RV <sup>766</sup> IQ                                                   | [13]GEDR                                                                                                                                                                                                                                                                                                                       | 3212 |
| Query_10019 | 3178 | Q <sup>767</sup> KI <sup>768</sup> TE <sup>769</sup> M <sup>770</sup> QE <sup>771</sup> FL <sup>772</sup> E <sup>773</sup> IA <sup>774</sup> EEG--NF <sup>775</sup> SS <sup>776</sup> MP--V <sup>777</sup> LS <sup>778</sup> LL <sup>779</sup> N <sup>780</sup> K <sup>781</sup> W <sup>782</sup> Y <sup>783</sup> RL <sup>784</sup> PH <sup>785</sup> IL <sup>786</sup> HP <sup>787</sup> IG <sup>788</sup> V <sup>789</sup> W <sup>790</sup> DD <sup>791</sup> IV <sup>792</sup> T <sup>793</sup> NR <sup>794</sup> VL <sup>795</sup> F <sup>796</sup> MS <sup>797</sup> K <sup>798</sup> FL <sup>799</sup> Q <sup>800</sup> K <sup>801</sup> FEAM-                                                                                    | [1]AEER                                                                                                                                                                                                                                                                                                                        | 3250 |
| Query_10020 | 3009 | S <sup>802</sup> LIV <sup>803</sup> IED <sup>804</sup> EAL <sup>805</sup> I <sup>806</sup> RL <sup>807</sup> NEDG--SD <sup>808</sup> ICK <sup>809</sup> N <sup>810</sup> eh <sup>811</sup> FG--F <sup>812</sup> VE <sup>813</sup> N <sup>814</sup> W <sup>815</sup> K <sup>816</sup> Q <sup>817</sup> P <sup>818</sup> PT <sup>819</sup> GE <sup>820</sup> EG <sup>821</sup> M <sup>822</sup> VL <sup>823</sup> WS <sup>824</sup> Q <sup>825</sup> HT <sup>826</sup> M <sup>827</sup> Q <sup>828</sup> NAI <sup>829</sup> T <sup>830</sup> SL <sup>831</sup> ML <sup>832</sup> NR <sup>833</sup> AHD <sup>834</sup> Q                                                                                                                    | [1]----                                                                                                                                                                                                                                                                                                                        | 3079 |
| Query_10021 | 3434 | H <sup>835</sup> RL <sup>836</sup> TE <sup>837</sup> LES <sup>838</sup> L <sup>839</sup> T <sup>840</sup> L <sup>841</sup> T <sup>842</sup> GD <sup>843</sup> R--RR <sup>844</sup> Q <sup>845</sup> V <sup>846</sup> vs <sup>847</sup> TAD <sup>848</sup> L <sup>849</sup> AK <sup>850</sup> WR <sup>851</sup> RR <sup>852</sup> PD <sup>853</sup> F <sup>854</sup> IR <sup>855</sup> DAC <sup>856</sup> D <sup>857</sup> S <sup>858</sup> ERT <sup>859</sup> V <sup>860</sup> AV <sup>861</sup> RL <sup>862</sup> LC <sup>863</sup> ANK <sup>864</sup> M                                                                                                                                                                                | ----                                                                                                                                                                                                                                                                                                                           | 3496 |
| Query_10022 | 3229 | Q <sup>865</sup> KI <sup>866</sup> YEM <sup>867</sup> REF <sup>868</sup> L <sup>869</sup> QS <sup>870</sup> IK <sup>871</sup> Q <sup>872</sup> EGL <sup>873</sup> Q <sup>874</sup> TK <sup>875</sup> S <sup>876</sup> D <sup>877</sup> IV <sup>878</sup> p <sup>879</sup> q <sup>880</sup> V <sup>881</sup> IK <sup>882</sup> SI <sup>883</sup> HK <sup>884</sup> W <sup>885</sup> MAR <sup>886</sup> V <sup>887</sup> PS <sup>888</sup> YAF <sup>889</sup> DT <sup>890</sup> IV <sup>891</sup> V <sup>892</sup> W <sup>893</sup> DD <sup>894</sup> IL <sup>895</sup> T <sup>896</sup> ARN <sup>897</sup> LY <sup>898</sup> ID <sup>899</sup> LY <sup>900</sup> K <sup>901</sup> F <sup>902</sup> RL <sup>903</sup> K <sup>904</sup> DEF | [1]----                                                                                                                                                                                                                                                                                                                        | 3301 |
| Query_10001 | 3187 | TSIDAKIDPPG-- --KQRVV                                                                                                                                                                                                                                                                                                                                                                                                                                                                                                                                                                                                                                                                                                                    | MSLAQVDAASLQGNHS <sup>905</sup> VARK <sup>906</sup> LK <sup>907</sup> LSA----KD--LVK <sup>908</sup> Vv--dS---EELS <sup>909</sup> VL <sup>910</sup> FT <sup>911</sup> H <sup>912</sup> SH <sup>913</sup> A                                                                                                                      | 3248 |
| Query_10002 | 3267 | GEEETALEK---[1]ILRERLW                                                                                                                                                                                                                                                                                                                                                                                                                                                                                                                                                                                                                                                                                                                   | LELKMADSA <sup>914</sup> CQ <sup>915</sup> GN <sup>916</sup> FS <sup>917</sup> V <sup>918</sup> AQ <sup>919</sup> K <sup>920</sup> HL <sup>921</sup> KAT----HG--SLSA---H---EDL <sup>92</sup>                                                                                                                                   |      |

Supplementary Figure 5: COBALT analysis DNA-PKcs from representative examples from all major phyla (short list)

|             |      |          |                                  |                        |                         |                              |                                |                          |                  |                  |             |            |              |         |           |          |         |       |      |              |      |   |   |   |   |     |     |          |     |      |      |
|-------------|------|----------|----------------------------------|------------------------|-------------------------|------------------------------|--------------------------------|--------------------------|------------------|------------------|-------------|------------|--------------|---------|-----------|----------|---------|-------|------|--------------|------|---|---|---|---|-----|-----|----------|-----|------|------|
| Query_10001 | 3249 | NANKRKC  | aSG-SEPSERLNLLVEVKKR-LDKCS       | ESSTLKLN               | --AALLCDQHLLQGE--       | HLVTMATILQNVKDI              | 3316                           |                          |                  |                  |             |            |              |         |           |          |         |       |      |              |      |   |   |   |   |     |     |          |     |      |      |
| Query_10002 | 3328 | QMNQQKI  | -LT-IELKEQVMTLLTTFDP-LAKLS       | NTPALTDG               | --YCLTRRHHTLTSKSY       | DLVAIA-IQKGGADIL             | 3395                           |                          |                  |                  |             |            |              |         |           |          |         |       |      |              |      |   |   |   |   |     |     |          |     |      |      |
| Query_10003 | 3315 | RLHKKKA  | -SL-LTGADKLNNVLTTFEQ-LDKFS       | SCRVFEED               | --LAVAKQHHTLTSLSY       | EIVAHALIQEGGA-IL             | 3382                           |                          |                  |                  |             |            |              |         |           |          |         |       |      |              |      |   |   |   |   |     |     |          |     |      |      |
| Query_10004 | 3282 | RLSHCRS  | -RS-QGCSEQVLTVLKTVSL-LDENN       | VSSYLSKN               | --ILAFRDQNILLTGTTY      | RIIANA-LSSSEPACLA            | 3349                           |                          |                  |                  |             |            |              |         |           |          |         |       |      |              |      |   |   |   |   |     |     |          |     |      |      |
| Query_10005 | 3301 | RLSHRRS  | -QR-QARPEQVTVLKS IPL-LVEIN       | VD-YLNTH               | --TRILRDQNTLLGSSY       | CILADA-LNKPEPTCLQ            | 3367                           |                          |                  |                  |             |            |              |         |           |          |         |       |      |              |      |   |   |   |   |     |     |          |     |      |      |
| Query_10006 | 3233 | STHQKKI  | -IS-NDWSE--DGINGLLTT-IGKFN       | DSDVLSKK               | --PDLYRRHHVLTATSY       | ELLAESCLAELPQSL              | 3299                           |                          |                  |                  |             |            |              |         |           |          |         |       |      |              |      |   |   |   |   |     |     |          |     |      |      |
| Query_10007 | 3259 | KLHNKITE | VT-MDASATLSPVLGALGL-LERRR        | DHKLVKES               | --NVLTRRHVLVQGNIF       | DSVTSLSLSDPDFSSV             | 3328                           |                          |                  |                  |             |            |              |         |           |          |         |       |      |              |      |   |   |   |   |     |     |          |     |      |      |
| Query_10008 | 3165 | AVKSRTA  | -----YLMQALNLFDL--KRIS [ 2 ]     | EVNVTEGS               | -----SADQFALIGMLF [ 2 ] | --VAETVVASSENTLA             | 3224                           |                          |                  |                  |             |            |              |         |           |          |         |       |      |              |      |   |   |   |   |     |     |          |     |      |      |
| Query_10009 | 3326 | KIYCLKAK | NS-TTQVETLDRFIKALKF-VESKS        | DEDSIKNN               | p--DNLQRYKRLHGNIQ [ 5 ] | -----LDQKLGSLN               | 3393                           |                          |                  |                  |             |            |              |         |           |          |         |       |      |              |      |   |   |   |   |     |     |          |     |      |      |
| Query_10010 | 3255 | KLNLREA  | qNT--IDTEKKAELLLALSeFKKVK        | --SSDRDDi              | -----KMRIIESETY [ 3 ]   | -----                        | 3306                           |                          |                  |                  |             |            |              |         |           |          |         |       |      |              |      |   |   |   |   |     |     |          |     |      |      |
| Query_10011 | 3227 | RLQCLRA  | eRD-----ESANNRIKKLQQLVYIE [ 1 ]  | JERRKLSKH              | p-----                  | EFLPEFQMEQADVNR              | 3280                           |                          |                  |                  |             |            |              |         |           |          |         |       |      |              |      |   |   |   |   |     |     |          |     |      |      |
| Query_10012 | 3179 | KAKWLQA  | qLK-NTTDEKLLGLDWS-----           | ----VIDD               | --QRFE-QYPMLHAETL [ 4 ] | VMAAGILQQLEQQPGV             | 3241                           |                          |                  |                  |             |            |              |         |           |          |         |       |      |              |      |   |   |   |   |     |     |          |     |      |      |
| Query_10013 | 3310 | AYHLHEF  | ----NLGVREQKHFRFARDLDRLN [ 4 ]   | DLPPSKS                | ahSLYKAEVLLSLGKIV [ 9 ] | KVLWDHIIAEVDAPDA             | 3392                           |                          |                  |                  |             |            |              |         |           |          |         |       |      |              |      |   |   |   |   |     |     |          |     |      |      |
| Query_10014 | 3219 | NTHLNKC  | -KQ-ANSKESLESFF--ESM-VLREI [ 5 ] | ISDTFKNN               | gkNYLYQEQRVLHKSFS       | KFLIESLMDHMNQTFD             | 3292                           |                          |                  |                  |             |            |              |         |           |          |         |       |      |              |      |   |   |   |   |     |     |          |     |      |      |
| Query_10015 | 3236 | ETHLLRG  | gGK-QT--DRLKYLVEAWAKYLRGVS       | SMSILDQN               | --PRVEIQYKLKES-- [ 3 ]  | LEICRAIQMDGDDWTE             | 3304                           |                          |                  |                  |             |            |              |         |           |          |         |       |      |              |      |   |   |   |   |     |     |          |     |      |      |
| Query_10016 | 3278 | D--LKKA  | -KN-QNYPEQLDTLLCAHKQ-LAKLD [ 5 ] | KLDVSTMN               | --HYLQSE-----           | --IIEMAADIVKYNDV             | 3339                           |                          |                  |                  |             |            |              |         |           |          |         |       |      |              |      |   |   |   |   |     |     |          |     |      |      |
| Query_10017 | 3300 | KVRLDRI  | -HQ-DPSPDMEAVISLTCQ-MDNFK [ 5 ]  | SGKGAISS               | --KPFISQHHVLLGKLL       | NKMAEFATPEDGMLA              | 3373                           |                          |                  |                  |             |            |              |         |           |          |         |       |      |              |      |   |   |   |   |     |     |          |     |      |      |
| Query_10018 | 3279 | KVHCDKS  | -LL-TPPDERLKLTLTANSQ-FEKVK       | DLSVILEN               | --TTLMREHLLLRSLFL       | DMTSKI-LAESDASIL             | 3346                           |                          |                  |                  |             |            |              |         |           |          |         |       |      |              |      |   |   |   |   |     |     |          |     |      |      |
| Query_10019 | 3314 | EVHFRKI  | -QT-LTAVGAVETALLVAGQ-LDKFS       | ASKILBIE               | --PLRGIQHHLRSKTF        | DILCKA-MLDGGVVIA             | 3381                           |                          |                  |                  |             |            |              |         |           |          |         |       |      |              |      |   |   |   |   |     |     |          |     |      |      |
| Query_10020 | 3130 | KLNVIRMI | eVF-----VSHVLKLI---DRQE [ 2 ]    | SSDSTSik               | ----LITKYETATKLF [ 3 ]  | EIMHMMKIATARDQVA             | 3193                           |                          |                  |                  |             |            |              |         |           |          |         |       |      |              |      |   |   |   |   |     |     |          |     |      |      |
| Query_10021 | 3570 | KAWTTA   | ALSLd-----TDRnFDAMS ---VAEKv     | --AKVRRQLISPSPTW [ 1 ] | ELLAAGLCDRASALL         | 3625                         |                                |                          |                  |                  |             |            |              |         |           |          |         |       |      |              |      |   |   |   |   |     |     |          |     |      |      |
| Query_10022 | 3372 | DTMNLNF  | aDKg----DKLQIKVVFdskMQESF [ 1 ]  | EDQQFOED               | l--RTEIKCILLKQKLE [ 4 ] | NIIFQGVSAEKEIKHL             | 3444                           |                          |                  |                  |             |            |              |         |           |          |         |       |      |              |      |   |   |   |   |     |     |          |     |      |      |
| Query_10001 | 3317 | DA-IDQK  | LLEKITESVGPALSHQE-IVA            | SLHEAA                 | YNSFKSGVGVA             | A-----SQPESVVCVNKAYMSLVHFCDQ | 3382                           |                          |                  |                  |             |            |              |         |           |          |         |       |      |              |      |   |   |   |   |     |     |          |     |      |      |
| Query_10002 | 3396 | TGlrNV   | GKLDKLLGLVGQNA                   | TRPEQ-ICST             | LYSKAYS                 | ELKQAVSLA                    | DKDDAV---TSQESRSMTEAYMALVSFCDR | 3467                     |                  |                  |             |            |              |         |           |          |         |       |      |              |      |   |   |   |   |     |     |          |     |      |      |
| Query_10003 | 3383 | TglkD    | TRHAQLLTAAGVSPD                  | TSVDQ-TISS             | LLQKGHACLQKAVKLA        | SDEEKARQD                    | TSLDKSGIVDAFAMAMVGFCDK         | 3457                     |                  |                  |             |            |              |         |           |          |         |       |      |              |      |   |   |   |   |     |     |          |     |      |      |
| Query_10004 | 3350 | EI--EED  | KARRILEL                         | SGSSSEDSK-VIAG         | LYQRAF                  | QHLSBAVQAA                   | EEEAQPPSWSCGPAAGVIDAYMTLADFCDQ | 3422                     |                  |                  |             |            |              |         |           |          |         |       |      |              |      |   |   |   |   |     |     |          |     |      |      |
| Query_10005 | 3368 | RI--KED  | QAERVIEHSGSSSEIEIQE-VVIG         | LHRKTL                 | HLHLERAVRKA             | EEEVQLSAGEHVD                | IAGVIEAYVNLANFCDR              | 3440                     |                  |                  |             |            |              |         |           |          |         |       |      |              |      |   |   |   |   |     |     |          |     |      |      |
| Query_10006 | 3300 | SS-kTC   | DKLKNLLKTDNLDK                   | TQVN--IVS              | LLQKSHQELKSAIS--        | --DSVVTTRSRSFTE-ADAQI        | LALSKFCDK                      | 3367                     |                  |                  |             |            |              |         |           |          |         |       |      |              |      |   |   |   |   |     |     |          |     |      |      |
| Query_10007 | 3329 | SP-rDI   | QKLVAAASCSMQNADMQE--IING         | LVDRG                  | YQYKEAV---              | ---DIYEEDSSNDKST-VE          | THMALAKYCDK                    | 3394                     |                  |                  |             |            |              |         |           |          |         |       |      |              |      |   |   |   |   |     |     |          |     |      |      |
| Query_10008 | 3225 | EF-----  | CLSRWISKTD                       | TADISELVMT             | MCYQAFRYLKLSCQYS        | -----SQLNIESPKLTPLEPL        | MELSSFCDR                      | 3285                     |                  |                  |             |            |              |         |           |          |         |       |      |              |      |   |   |   |   |     |     |          |     |      |      |
| Query_10009 | 3394 | VM--ENL  | KKNGLTSLSLPT                     | TRLSS-----ELF          | SLAYQSYSQSIQLY [ 1 ]    | -----SNSNNNDTHKS             | KSAYLQFGNFCDT                  | 3459                     |                  |                  |             |            |              |         |           |          |         |       |      |              |      |   |   |   |   |     |     |          |     |      |      |
| Query_10010 | 3307 | -----    | VSELDKRV                         | PNRLLKIKHNK            | NYFIERGYNLFNNATKEI      | -----SLQKPSMHAKILV           | KFAKFCDY                       | 3366                     |                  |                  |             |            |              |         |           |          |         |       |      |              |      |   |   |   |   |     |     |          |     |      |      |
| Query_10011 | 3281 | VA-----  | WATLSSQSGEGATSQDITAC             | PALGSAFK               | YJSTALDND [ 9 ]         | -----SLSPHD                  | TAKALLKPLFCDE                  | 3349                     |                  |                  |             |            |              |         |           |          |         |       |      |              |      |   |   |   |   |     |     |          |     |      |      |
| Query_10012 | 3242 | LTKlP    | AAEVKKLADRIGAPDCSQDT-LM          | QNLQYGLSSLKTAAEVV      | TP---RG---NSE           | QAVAKAYLQVAKYCR              | A                              | 3309                     |                  |                  |             |            |              |         |           |          |         |       |      |              |      |   |   |   |   |     |     |          |     |      |      |
| Query_10013 | 3393 | TRagE    | KCIVRAFVLLETAQ                   | RAPDpKALPVG            | KRRAGQFA [ 21 ]         | KPLDVLFP                     | SATAYGSETLNAFVRLAEFCAD         | 3489                     |                  |                  |             |            |              |         |           |          |         |       |      |              |      |   |   |   |   |     |     |          |     |      |      |
| Query_10014 | 3293 | DS----   | GLQGIITE-----K                   | HHVLT--LSD             | YVKNDDINDFEKTISS        | LMKHGVDNLLKIKD               | SLKGS--LELATYCDF               | 3355                     |                  |                  |             |            |              |         |           |          |         |       |      |              |      |   |   |   |   |     |     |          |     |      |      |
| Query_10015 | 3305 | DnqyM    | QVLSKFFENANGKES                  | WQREL-LSCS             | YKSLQLAVNCAEGLV         | KSDALNQD--DSK                | SDSAHLALVKYCE                  | 3376                     |                  |                  |             |            |              |         |           |          |         |       |      |              |      |   |   |   |   |     |     |          |     |      |      |
| Query_10016 | 3340 | HA----   | EKIQLTDFFSIQSKS                  | LE--IDL                | FCKN---YEYK             | CRALD                        | IIQEVEQKMIEDFQATIGETYP         | KFANYCNK                 | 3406             |                  |             |            |              |         |           |          |         |       |      |              |      |   |   |   |   |     |     |          |     |      |      |
| Query_10017 | 3374 | LSaL     | SDNGNTKLSNLIGGTP                 | STSKaISEGL             | WLQALSFNAGVRS           | TTLNPL---TKDP                | VPTVQSL                        | ELFGCDN                  | 3445             |                  |             |            |              |         |           |          |         |       |      |              |      |   |   |   |   |     |     |          |     |      |      |
| Query_10018 | 3347 | DL--L    | NEKESLYQLANVNQ                   | HDSKEIAAKL             | TSACALHQAVKAS           | KEERG--G-----                | SSYIEAMMMVNFCD                 | D                        | 3412             |                  |             |            |              |         |           |          |         |       |      |              |      |   |   |   |   |     |     |          |     |      |      |
| Query_10019 | 3382 | TL--E    | SQAKNALVKLCRIDETES               | QkVVSD                 | LMTRS                   | FVLSQSAIKAA                  | KNAEG--KCNTTQTSG               | TVDAMIAMVNFCDN           | 3453             |                  |             |            |              |         |           |          |         |       |      |              |      |   |   |   |   |     |     |          |     |      |      |
| Query_10020 | 3194 | VgyLE    | AKTFAKAAAFYAFND                  | LDLDDL--SKK            | FYRS                    | SLDRFKDSCRR                  | --DAVLSKQSQDDAP                | PAFLRCLRTYIEFLND         | 3266             |                  |             |            |              |         |           |          |         |       |      |              |      |   |   |   |   |     |     |          |     |      |      |
| Query_10021 | 3626 | RI-----  | QLASSPSTGQAN                     | MRaEAEAFK              | FKSALSNLQSAASKA [ 9 ]   | -----SSSQ                    | CHLELIRFCDS                    | 3688                     |                  |                  |             |            |              |         |           |          |         |       |      |              |      |   |   |   |   |     |     |          |     |      |      |
| Query_10022 | 3445 | QR-----  | YQkDCT                           | YLD                    | RSFKTL                  | DQVIKKV                      | ---QTA                         | AQFDDQMKMTMAKTYFKFAQFSDK | 3496             |                  |             |            |              |         |           |          |         |       |      |              |      |   |   |   |   |     |     |          |     |      |      |
| Query_10001 | 3383 | V-LRQ    | RENDEISG                         | TGC-E                  | SEEDFP                  | LALVTSLLSAMKNSK--DARQL       | FPRL                           | LQIIE                    | RFP--QT          | RE               | VFIRKSR     | 3448       |              |         |           |          |         |       |      |              |      |   |   |   |   |     |     |          |     |      |      |
| Query_10002 | 3468 | M-LRL    | KESDEV                           | PMTYL-P                | QTDNF                   | SQT                          | VVYHTL                         | KAMHYS                   | SQ--EARQR        | FPRL             | LQ          | VEACP--DT  | MQ           | LMIKEVS | 3533      |          |         |       |      |              |      |   |   |   |   |     |     |          |     |      |      |
| Query_10003 | 3458 | I-LRH    | QEDDE-EG                         | TCL-S                  | SIPGL                   | AAAVVSNL                     | QALRHDS                        | P--EARQR                 | FPRL             | LQ               | VEI         | YP--DT     | MD           | LFIEKVS | 3522      |          |         |       |      |              |      |   |   |   |   |     |     |          |     |      |      |
| Query_10004 | 3423 | Q-LR     | KEEENAS                          | VIDS                   | A--ELQ                  | AYPALVVEKML                  | KALKLNSN--EARLK                | FPRL                     | LQIIE            | RYPE-ET          | LS          | LMTKEIS    | 3488         |         |           |          |         |       |      |              |      |   |   |   |   |     |     |          |     |      |      |
| Query_10005 | 3441 | C-LR     | KEES                             | A                      | INFS--EQQT              | FPAC                         | IKAMK                          | YNSK--EARLK              | FPRL             | LQIIE            | VKLYSA-ET   | LD         | LMKKEVS      | 3506    |           |          |         |       |      |              |      |   |   |   |   |     |     |          |     |      |      |
| Query_10006 | 3368 | F-LRM    | KENE                             | EHIKE-K                | VIENY                   | GETI                         | IICLL                          | KAMK                     | LSM--EAIER       | FPRL             | LQ          | FVELYP--DT | MP           | TFIKMVS | 3432      |          |         |       |      |              |      |   |   |   |   |     |     |          |     |      |      |
| Query_10007 | 3395 | Y-LKL    | RE-ED-DS                         | LTG-E                  | SIDS                    | YPEAVV                       | TSLLR                          | CIELDH                   | M--DARQR         | FPRL             | LQ          | VEYYP--DT  | MQ           | GFINKVS | 3458      |          |         |       |      |              |      |   |   |   |   |     |     |          |     |      |      |
| Query_10008 | 3286 | I-LR     | KNGT                             | SLVNS                  | ECAC                    | -----VM                      | RSILKSMKNGSH-LARQL             | FPRL                     | LSVME            | KYPE--S          | EL          | EFQAEID    | 3345         |         |           |          |         |       |      |              |      |   |   |   |   |     |     |          |     |      |      |
| Query_10009 | 3460 | E-L      | QRRG                             | D                      | S                       | EDSNL                        | RVL [ 1 ]                      | -----VVNS                | INNAIKQ          | IP-GAIEK         | FPRL        | LEIISQ     | YEK--A [ 2 ] | E       | -FVERTK   | 3519     |         |       |      |              |      |   |   |   |   |     |     |          |     |      |      |
| Query_10010 | 3367 | F-LR     | KLDF                             | TEEQ                   | TQIFD [ 1 ]             | --AQYAS                      | NVESILQAMENGSK-EATEL           | FPRL                     | LQIIE            | KYHN--T          | Q [ 2 ]     | -FK        | KEVK         | 3432    |           |          |         |       |      |              |      |   |   |   |   |     |     |          |     |      |      |
| Query_10011 | 3350 | L-LK     | LSQ                              | PEERS                  | QMTQH [ 6 ]             | QASD                         | LSLLVVRHMLKALALD               | ST1QAQ                   | HAVARLLS         | LVGFSSA--T [ 2 ] | -E [ 2 ]    | RFLDN      | VNS          | 3426    |           |          |         |       |      |              |      |   |   |   |   |     |     |          |     |      |      |
| Query_10012 | 3310 | -----    | HSNTS                            | REDN--                 | ----FG                  | TDVTSILRAMRYGSK--DARQL       | FPCL                           | LQ                       | LPGLDT--SL       | SE               | LFHKES      | 3364       |              |         |           |          |         |       |      |              |      |   |   |   |   |     |     |          |     |      |      |
| Query_10013 | 3490 | V---L    | QRIAMP                           | KDSMGR [ 1 ]           | ----KQV                 | FVTALAMRSGNV-LMRQ            | FPQL                           | NLNG                     | RPTds            | SDH              | LQ          | RVLAS      | AT           | 3552    |           |          |         |       |      |              |      |   |   |   |   |     |     |          |     |      |      |
| Query_10014 | 3356 | Y-LR     | IAEND                            | NDFE                   | KLTL [ 4 ]              | IRSQ                         | FPFIVTEQLYSIRSGSL-EARTR        | FPRL                     | LQIIE            | LYPD-EC          | LE          | KFVSSSE    | 3427         |         |           |          |         |       |      |              |      |   |   |   |   |     |     |          |     |      |      |
| Query_10015 | 3377 | CvIK     | WDH                              | V                      | D                       | SQ-----YSK                   | SLMVSVLRAMANGSR-DAH            | FH                       | PRLIN            | LMNE             | DA--SL      | LS         | SFKEEYE      | 3435    |           |          |         |       |      |              |      |   |   |   |   |     |     |          |     |      |      |
| Query_10016 | 3407 | I-LRM    | QEE                              | ----E                  | EKTL [ 2 ]              | SFET                         | YPSVLTNSLLNALKNGNL-NAIKL       | FPRL                     | LQIIE            | VYPD-T-          | IP          | EFI        | AKSK         | 3470    |           |          |         |       |      |              |      |   |   |   |   |     |     |          |     |      |      |
| Query_10017 | 3446 | A-LR     | QED                              | H                      | DEQ                     | STGL--DTKS                   | PPSIIINH                       | TLTAMSLGSS-KAREL         | FPRL             | LQ               | VEAHP--DT   | MD         | LMINKSS      | 3510    |           |          |         |       |      |              |      |   |   |   |   |     |     |          |     |      |      |
| Query_10018 | 3413 | I-LR     | HED                              | G                      | RANQ                    | PKGLI                        | DTKI                           | FPFVIRY                  | TLEAMAYNSM-DARQR | FPRL             | LQIIE       | RNP--NT    | ID           | GFMRKSS | 3479      |          |         |       |      |              |      |   |   |   |   |     |     |          |     |      |      |
| Query_10019 | 3454 | C-LR     | KEV                              | S                      | V                       | APVE--V                      | DTK                            | LPFGIVVYMLKSMCYSSK-EARQ  | K                | FPRL             | LQIIE       | VHKYP--DT  | LE           | AFVKKAA | 3517      |          |         |       |      |              |      |   |   |   |   |     |     |          |     |      |      |
| Query_10020 | 3267 | LLY      | KRQ                              | LEK                    | L                       | ANF                          | ADSKV ---L                     | LKIL                     | LVNR             | GMAGDR-EC        | ANY         | FPGL       | CDVVS        | PYPD-IV | AE [ 5 ]  | ----LT   | 3331    |       |      |              |      |   |   |   |   |     |     |          |     |      |      |
| Query_10021 | 3689 | CILE     | AAP                              | N                      | Q                       | P                            | Q                              | FRAAL [ 3 ]              | -----AV          | SVTSAM           | RCSQ--EASIR | FPRL       | CLL          | GESAD   | DEA [ 4 ] | AD [ 5 ] | RFSRQMA | 3762  |      |              |      |   |   |   |   |     |     |          |     |      |      |
| Query_10022 | 3497 | I-LR     | K                                | M                      | E                       | N                            | D                              | Q                        | C                | R                | V           | I          | T            | N       | S [ 6 ]   | SEBQ     | VARD    | IKYGL | LSLN | NHEYQ--NASDI | IPRL | L | I | T | S | KYK | --H | VQ [ 2 ] | -FI | AYSK | 3570 |

Supplementary Figure 5: COBALT analysis DNA-PKcs from representative examples from all major phyla (short list)

|             |      |                                                                                          |      |
|-------------|------|------------------------------------------------------------------------------------------|------|
| Query_10001 | 3449 | D---IPAWMFLGWSQICAILDKPE--SSAIHEILLNIADIYPNALVFPFKLSNHNYKF-TSDAVSSKSKSVCDRHLQML          | 3522 |
| Query_10002 | 3534 | D---VPCWFMFIGWISQMVALLDKPE--GPAVHGILTDIAYEYPQALCFPFKISSSEFFTF-DESNTRGRKNASAAARKIGAIL     | 3607 |
| Query_10003 | 3523 | H---VPSWLCISWLGQMVALLDKPE--AVAVHGILTRIAQEYYPQALVYPLKISSENFEF-EDSVTGRNRQEAFTSLKKTLL       | 3596 |
| Query_10004 | 3489 | S---VPCWQFISWISHMVALDKDQ--AVAVHVEEITDNYPOAIVYFPFKISSSEYSF-KDTSTGHKNKEFVARIKSKL           | 3562 |
| Query_10005 | 3507 | S---VPCWQFISWQMMALDKKE--AVVVOHIEEELADSPQAIYVYPLMISSESYTF-EQTARGNTKNEFVERLKNKL            | 3580 |
| Query_10006 | 3433 | Enr1FPLWMLLWLNQMMALDKTE--SPAVQPIILQIGTEYPQAIAYPPFRISCEGFEF-EDSAQGGKKNKAVKKLASIL          | 3509 |
| Query_10007 | 3459 | ---VIPCWFMFTWIGQLVALDKPE--APAVHILIRAREYYPQALVYFPFKVSKYCYTF-ERSSEGENQAVVERLDPSL           | 3532 |
| Query_10008 | 3346 | S---VPSWMLFSLWMMQMLSAKLR--SNFKYSILERADDPQALYPLMLK-----SATGDVGETDFYRLQKLL                 | 3410 |
| Query_10009 | 3520 | Q---IPCWQFIRWQSQMFPYLDTPQ--GPYIPLIQEIASNYPOAIVYFPFKISSSEQFGP-----TAKKLTAKLEQTL           | 3586 |
| Query_10010 | 3433 | Sie--SVWKFIRWIPQIVALDQSI--AHCVPFILFKLAEPFGSLYPLTISSEYKFDENNPLTRENKAKIQELKQMI             | 3508 |
| Query_10011 | 3427 | S-----WVPVAWIPQMLANIEEDS--GRVLIKVLESIAKSPQALYFPFVSEDTDFGA-----IGRQRTQHLKILL              | 3490 |
| Query_10012 | 3365 | A---VPVWMLGWNQQLACLGPV--GPVLHDIILRLAETYPQSLIYAFQLSREKYNL-E-SGHVSL-KALVDQLASLL            | 3436 |
| Query_10013 | 3553 | TS---VPCWMLNWIQMLAIDLDAPE--APVVOQLKTIASSYPQALCFPVMLESEKLFK-SGAASSTQRTFFTNLVRMVT          | 3627 |
| Query_10014 | 3428 | D---IPSWMLFSLWQMTALDKPQ--AKAIFQIENISIEYPQALVYFPFRMSTENFKE-SNELN--EQSDFVQKISRHL           | 3499 |
| Query_10015 | 3436 | K---VPIWMLLWLSHILYVDPKVP--GPAQPVVERLAAYEYPAQVYFPFGISKQOYNF-S-SHEGKLAKAMCDKVEALL          | 3508 |
| Query_10016 | 3471 | V---VPCWMLFSLWINQLLTLDKPE--ATAVYIIEIGTNPALVYFPFKLSYEMKVF-PDTLQGGKKNKEFVMKLSL             | 3544 |
| Query_10017 | 3511 | T---IPCWFMFIGWINQMIALVDKPE--SRAVHDILIRADTYPQSLYAFRMSSEGYKF-GHN--NSEGKELFELKKEKL          | 3582 |
| Query_10018 | 3480 | A---IPSWMFIGWISQMMALDKPE--ARAVQELIFRIDEYPAQIYAFKVSNEQYTF-EETSVGRQNTAVSKLSKLL             | 3553 |
| Query_10019 | 3518 | D---VPCWFMFIGWINQMAIDLKPE--GKAVHGIVSEIAKRYPQALWYFPFKISSSEHFVF-ENSEDGKANEEAVKRRLSSL       | 3591 |
| Query_10020 | 3332 | D---VPLWTCLOWSAQLMALNGDI--GMTIVAILKLAERYPVALYFDFMVTCSRSD-----IFKVDLRRLVLL                | 3398 |
| Query_10021 | 3763 | S---PVMWLSLWPLQVSLDKPDqgGSVLPLESVCDIYPALVYFPFLARANYRF---ETGDSGARQAARLRQRL                | 3836 |
| Query_10022 | 3571 | Et---PTWYFLRWIQLIVAVVNRPE--SSVIEEKVIQIAKKYPAQALYFPFKVSESNVKV-NVLDSDVQKTLFQKLSKY          | 3644 |
| Query_10001 | 3523 | SK---NPLIDRLIFSELEMMHEPAVLIKDWIMDM---KNAKPGGSSqSLSMAYVKERYQELYKELL-- [ 4 ] EDGSLYSDS     | 3595 |
| Query_10002 | 3608 | ES--i-PLLDDFICALQELNNEPEFVKDADDV-mKPLLNv----aKRDKNKIRQACHEIYMNLINH [ 7 ] GAGSSQDSQ       | 3682 |
| Query_10003 | 3597 | SV--iYSLVDKLLIGGLEQLSHDPQLFKDWGDDAdLKRLLKVPDKKrtKEDKVTIKRLLYDEMYSLLDF [ 7 ] SMSSLFQSG    | 3678 |
| Query_10004 | 3563 | DQ---GGVIGDFINALDQLSNPPELLFKDWSNDV-raELAKTPV-----NKKNIKMYERMYAAL--- GDPKAPGL-            | 3625 |
| Query_10005 | 3581 | DK---GGMVVFVINSLEQLSNPDMFLFKDWDVNF-rSKLEKKE-----NKTQLKNLYSEMYSNL--- ANAGAPGI-            | 3642 |
| Query_10006 | 3510 | Tedkv-PLVNFKFISSALDQFGQPPEMLFKDWDTDI-l-KMMLQSK---NRNKSIMEKYKEIYNMLIEY [ 7 ] STQLSYMTQ-   | 3585 |
| Query_10007 | 3533 | S--ki-PLVETFINALEQFGQPNALFKDWTGEM--AKLLHVK---QRNTDAVQRCTQMYSSLM-M [ 7 ] VSDQIFDTE        | 3605 |
| Query_10008 | 3411 | RKt--KIVKEFIDALNLLSHDPDIHAIDELESI---ILNISNNS---NEARKEAIKAVYSFVTF-----                    | 3465 |
| Query_10009 | 3587 | KN---PLIDTLISEFERLTHPEHRFKDYMETV--KTMKSTPIN----TSEIQKLGVEIYNDCFNP [ 4 ] -----            | 3647 |
| Query_10010 | 3509 | Kcd---VDTFVTELHRLTDSEIHFNCWINPV--YNLVKNRYSG--VDKTAIEIKASFQKMSFLKLP-----                  | 3568 |
| Query_10011 | 3491 | RN---PLEGLVRALEDLTFPQQRLKDGLLQI--LNLFLPTN---DSERAQLVFNIEYQDCLDT-----QSL                  | 3548 |
| Query_10012 | 3437 | FT---DPVIDIFLRAFSCLGQPRKMLYHFVEKL--EQLLNAK---RPNCDSLHHMVDTMKELFP- [ 1 ] SYGKIHGAL        | 3503 |
| Query_10013 | 3628 | TDh---LRRFVELKCLTNPVMAVMDWLEEQ---DQAIK--KRDQDALTAFKHLKSELLV- ----TSSTT                   | 3685 |
| Query_10014 | 3500 | NT--qLPLVEQFITALHLNTPKLFNDLIMDI--NPNLK----K-----NDVIMKLFKDLNNLID- ----LEGK               | 3557 |
| Query_10015 | 3509 | SS---HKLLHQFVSAMSLMVVPSACKDAIQNV--LQEKDKQ---KME-EGLESEIVSEFLKVQNR- [ 1 ] SKGNAEEKG       | 3574 |
| Query_10016 | 3545 | S---qLKLVDVFNALDLSVPELLYKEYEIKETI--LQMKKDKGDK---NEIV-KLYKLLCHELNFN- ----YNPR             | 3604 |
| Query_10017 | 3583 | QS---QLMDEFIAALEQLNSPELAWKDWYDNB-lKPLVGSVTPV--KRDKNAIKRVWEQMYSQLL-- [ 6 ] GDKSLYGGG      | 3626 |
| Query_10018 | 3554 | -Q---LPLIESEFVRALEQLSQPDLVFKDWDV-E-vKGLKKS--G---SIAESIRICYQLKRLDGLLVD [ 7 ] ASSLTSSEL    | 3656 |
| Query_10019 | 3592 | -E---HPLLEDFFIAALEMLTNPVEMVFRDWCCEP-mKQLLEDQIKR--NDSQAVKQCFGAMFQ--LLMD [ 7 ] GSQ-TRGT-   | 3664 |
| Query_10020 | 3399 | AN---PVMKFFVAALGLIHHPELRLKEGLRKT--ANLLDENRTS-----DARQTVLELWRDCEFSF-----                  | 3453 |
| Query_10021 | 3837 | RR1--PLVEEFIAQMGVCLPACTALDWLSSA-----KRSIQG---TERLRELHAEIADQLFFD-----                     | 3890 |
| Query_10022 | 3645 | Ekt--FRNLNAWAEALDCLVYPEHRFKYWLQI--NDIVSDDNMR--GIQKAKLKDIHIMMAYDLTCT-----Q                | 3707 |
| Query_10001 | 3596 | ADC--- [ 1 ] MGPYRSDFVKQFISQFDEYFGKMGSKIPGL---TFMKVLSWLS [ 2 ] SEKVKKAFSNKQPRK-LKEYSQWLA | 3665 |
| Query_10002 | 3683 | SSP--- [ 3 ] FGNFRRRFAQEWQKFEAAGFKDGTVIDMQLKTFSE----- [ 7 ] EMAAKRRD---PPGN-LKEYSTWFS    | 3753 |
| Query_10003 | 3679 | SSDLES [ 4 ] FGPFRRRFAQFAKECEKMFQKDGSKLLDMKEKEPFMKLSGLQ [ 8 ] KAFPPEKANCYAPGL-LKDYCPWLS  | 3763 |
| Query_10004 | 3626 | -----GAFRRRFIQTFGKEFDKHFQGGKSLLRMLKLSDFNDIT--- [ 1 ] MLLKMNKDSKPPGN-LKECSPWMS            | 3688 |
| Query_10005 | 3643 | -----GAFRRRFVTGFKKKIDQHFGKDGGLLLNMLNLFKFNVAV--- [ 1 ] QIM--ETQKPEPPGN-LKEYSPWMS          | 3703 |
| Query_10006 | 3586 | TTN--- [ 2 ] MGEYRKKFADTFKKDFDIAFGKNGEKLASMSIK-----KGRGKLVPPLS-LHEYCQWLA                 | 3643 |
| Query_10007 | 3606 | PDS--- [ 2 ] IGQYRQKFAKAYCKDLSAFQKDGKTKIMTSEEAADGIFKRM [ 2 ] SKGKTGHPNLVPEK-LGDYSKWMS    | 3679 |
| Query_10008 | 3466 | ADIRRD [ 1 ] LGSFWKCYFKKYLPMQEIFSVLDLCAFDNKAENYLRLCSSFL SELRTPYIPECCPN-LNEYSPWLA         | 3539 |
| Query_10009 | 3648 | -----GDYNLKFKEWDHHSYQHFSGKDGSLAKMDVKKLVELVADMS [ 1 ] -KMAKTMKPSSTATMkLDFSNWL             | 3714 |
| Query_10010 | 3569 | ----- [ 3 ] HGIFAKEFVNRHSEYLFDICRDRGSLILARMSPNDFKSKIYDYY [ 1 ] KNIKRQDRKAEQGVNLLKYSYAWLA | 3640 |
| Query_10011 | 3549 | KDPVRQ TGEYNLKFARDWASLIVKELGLNGSKLRSMDAKQFPSSVISGLF -EKLSKNDISAEKIS-LGSLSKWLA            | 3620 |
| Query_10012 | 3504 | FKDIQE ---YRRLKLEK--AESNIKCGM---KVKLKDICFKEKLYI- IQDIK-----PVQ-LKDYSPWLS                 | 3560 |
| Query_10013 | 3686 | ASDREV -GSAWKAAKAKARNFMDQFGKDGSKLLRMDAKAYAKVKVVK -AKLREYDTPKPPRT-LKEYSPWLS               | 3756 |
| Query_10014 | 3558 | IDFCGR ---LWTDPSNFIKPLFMQFGQFRLLPQLSELEIKNLQNIC SQVNEFCQRKPPSGN-LGDYSAWLK                | 3627 |
| Query_10015 | 3575 | EAYTRQ ---DRAKQOM--AEAFKAFGENLKKAKSLIRDIRQRELGSMD [ 1 ] VLQLSPEEMRKLPRQ-LKAYSWLA         | 3643 |
| Query_10016 | 3605 | DKMKER --KLHLKVAKVCSSVVFSEFGKDGKNLISMPKLEASVKYETLL KKITTMSEMNK-EAK-LRDFSDWLS             | 3674 |
| Query_10017 | 3657 | PSLQK- -GARQKTFQAAYAKNIEDKFGKGGAKIISMSGTQLASAFNEVY NKMRESLNKFSSSAL-LKDYSPWLD             | 3727 |
| Query_10018 | 3627 | IEF--- -GSHKRRFIQHFQKVIQYFGKDGSKLQSMKASDFEKIASRLI [ 1 ] EISGKIKNR---PEN-LKEYCPWLS        | 3693 |
| Query_10019 | 3665 | --ES--- -GPFRTKFAQEFANEVQRIFGKKEGKLVGVKMTDFSKWC-RDI [ 1 ] QKMKVFRNRTPPPGN-LKEYSPWLS      | 3732 |
| Query_10020 | 3454 | --QRQL [ 4 ] IGRYNRWRSRVAKRDVEKIMKDGKSLAKSLRDTVSAAREWINNHF SVTPGRYGITKDMKAhLGDFAEWLQ     | 3529 |
| Query_10021 | 3891 | PDGPPA [ 2 ] HGRLRREFAAHRHREFLALP TADRLVGRSEAEALQRAVQKLV KRVDRDERSSSVATARLADPSTWLA       | 3966 |
| Query_10022 | 3708 | KDLLGD [ 1 ] VGSYRKFALWQVFAKEFGSNLNRVDRMSNSEIKSVQNLN NKLNQSIGNLQGYEKLSTPSEWLD            | 3782 |

Supplementary Figure 5: COBALT analysis DNA-PKcs from representative examples from all major phyla (short list)

|             |      |                                                      |                               |                                                        |                |
|-------------|------|------------------------------------------------------|-------------------------------|--------------------------------------------------------|----------------|
| Query_10001 | 3666 | EFQ                                                  | AGNHEA--S--LEIPGQY            | TGE-VCPLPEYHAKISSFDSQVTVLRSRLMPKISIVIRGNDEKEYKFLVKGGED | 3734           |
| Query_10002 | 3754 | DFQ                                                  | QLSYDR--E--LEIPGQY            | GGK-SKPLPEYHVKIAGFDEQVKVLSMRKPKRIVIRGNDEHDYSFLVKGGED   | 3822           |
| Query_10003 | 3764 | DFN                                                  | PLDYDR--E--LEIPGQY            | TGR-VKPLMQYHAKIAGFDQRVKVMSLRKPKRVTIRGDDERDHPFLVKGGED   | 3832           |
| Query_10004 | 3689 | DFK                                                  | VEFLRN--E--LEIPGQY            | DGR-GKPLPEYHVRIAGFDERVTVMASLRKPKRIIRGHDEREHPFLVKGGED   | 3757           |
| Query_10005 | 3704 | NFK                                                  | PQFLGN--E--LEIPGQY            | DGK-CKPLPEYHAKITGFDERVKVMSLRKPKRILIRGNDEKEYPFLVKGGED   | 3772           |
| Query_10006 | 3644 | DFN                                                  | PNRDSR--E--LEIPGQY            | DGL-SKPLPEYHVKVAGFDERVLMVSSLRRPKRITIRGNDEKDYHFLVKGGED  | 3712           |
| Query_10007 | 3680 | GLA                                                  | AQDMDL--S--LEIPGQY            | TGL-SKPMPEYHVKIAGFDSRVLVLSMRKPKRITINGTDMKDHPFLVKGGED   | 3748           |
| Query_10008 | 3540 | GFR                                                  | PHPMDV--F--LEIPGQY            | SGD-RRPPEYHAKIAGFADIEIRMSLRKPKKICIQGDDGRDYKFLVKAGED    | 3608           |
| Query_10009 | 3715 | EFD[1]                                               | SNQLTE----LEIPGQY[1]-GT       | GT-SKPLPEYHAKISSFDPNLLVMGSLRKPRIKIHGSDQDYFLVKGGED      | 3783           |
| Query_10010 | 3641 | EYS                                                  | SSNVEK----eLEIPGQY            | DGLLSIPDPSKHKIASFDPKILVLSLRKPKRITILGTGNEYLFLVKGGED     | 3710           |
| Query_10011 | 3621 | DFD[8]                                               | SRDPDK--nEmqLEIPGQY           | NGS-SIPNLSTHVQLLGFQVLIKLSKQRPKILTRGSDENDYKFFVVKGGED    | 3700           |
| Query_10012 | 3561 | EFQ                                                  | GGKHCFF--Le-LEIPGQY           | TGE-SKPLIQHVVKIAGFKQTVVPMKTLRPLQVTFIGSDAKEHQYLVKFGED   | 3630           |
| Query_10013 | 3757 | KYR                                                  | SPGAVF--D--LEIPGQY            | GCT-EMPIPEEHAKIEGFDEKLIMASIRRPMLTFRGSDEREYRFLVKAGED    | 3825           |
| Query_10014 | 3628 | GFK                                                  | R-NITK--D--LEIPGQY            | NGM-EKPMPEYHVKIESFDERILEMSLRKPKCITIRGDDQREYKFLVKCGED   | 3695           |
| Query_10015 | 3644 | NFQ                                                  | ASKYSE--V--LEIPGQY            | TGM-SKPLPEYHVKISSFDENVLLMSMRVPMRIIRGDDEKEYKFLVKWGED    | 3712           |
| Query_10016 | 3675 | EFH                                                  | SIKYSE--D--LEIPGQY            | TGK-RKPIPEHHVKICNFDQKVDILSSLTKPRCLTIRGNDQKDYKFLVKSGED  | 3743           |
| Query_10017 | 3728 | TFR                                                  | QEDYLO--V--LEVPGLY            | DGR-SKPLPEYHAKITRFDKVLILSSLRKPKRLLTIGDDTREYMFVKGGED    | 3796           |
| Query_10018 | 3694 | NFQ                                                  | AANFTY--S--LEVPGLY            | TGR-SKPLPEYHLKIASFGERLLVLSIRKPKRLTIVGQDDEKEYLFLVKCGED  | 3762           |
| Query_10019 | 3733 | RFQ                                                  | SNNFTH--T--LEIPGQY            | TGK-TKPLPEYHVKIVGFDEKQVLSIRKPKCLTIRGDDEKDHMFVKGGED     | 3801           |
| Query_10020 | 3530 | EFD                                                  | HSSCIL-----ELPGQY[4]-GP       | GP--PDPATHVRLSFDMSLGVLSAQKPKKLTACSDKKNYFLVKGGED        | 3597           |
| Query_10021 | 3967 | EFA                                                  | ATEHGD--Ay-LEVPGLY[6]TAS      | ASLAKPQPELHTRIAFGDTRVVMSSLRPHRLTIRGNDQDRPFLVKAGED      | 4043           |
| Query_10022 | 3783 | SLD                                                  | FNDFYNpsEy-LEIPGQY            | EGLkSEPLIEKNVKAISVKKTLILLGSIRRPKRITVHGSNEKDYHLLIKGGED  | 3855           |
| Query_10001 | 3735 | LRQDQRVQVFNLMNEIYANDANCHARR--                        | LQKTFQVIMPMTPRLGMIIEWL        | KNSCTLKDFLRQCCSDV                                      | SWEQI 3805     |
| Query_10002 | 3823 | LRLDQRVEQLFRIMNSILEQDSTCSQQG--                       | LQLVTYEVIPMTPRLGMIIEWA        | QNTTTLKEFLHLAMTEQ                                      | EGNAY 3893     |
| Query_10003 | 3833 | LRQDQRIQQLFDIMNDILTDPAACSQRQ--                       | LRIRTYGVIPMTRSRLVGLIEWM       | QNTTPLAGFLENAMTTR                                      | EQEAF 3903     |
| Query_10004 | 3758 | LRQDQRVEQLFQVMNGILAQDSACSQRA--                       | LQRTYSVVPMTSRLGLIEWL          | ENTVTLKDLLLNTMSQE                                      | EKAAY 3828     |
| Query_10005 | 3773 | LRQDQRIEQLFQVFMNIIILSRDAACSQRS--                     | LQKTYQVIPMTRSRLGLIEWL         | DNTCTLKDFLSSNITEE                                      | TQSRR 3843     |
| Query_10006 | 3713 | LRQDARIEQLFVIMNKVFDKDPVCRHRK--                       | LHLKTYQVIPMTPRVGLIEWM         | NNTTPLKDFVYVYALTEQ                                     | ERKYY 3783     |
| Query_10007 | 3749 | LRQDQRLEQLFYIMNRFVSDQDDCKPRQ--                       | YKLRTYQVIPMTPRVGLIEWV         | NQTKTLKEVYVYGTMTQE                                     | EK--- 3816     |
| Query_10008 | 3609 | LRQDERVQQLFDFLMMGILQKQHC SRLK--                      | ARIRTYRIVPLSIKLGLIEFL         | PNVVPLQQFMEESLRK                                       | QYQTI 3679     |
| Query_10009 | 3784 | LRLDQRIQQLFFVMNEILKRPATSKRG--                        | LHIKTYQVVPMTGKVGIIIEWL        | NDTKPLKEIIEDQMAVH[3]ERSNV                              | 3857           |
| Query_10010 | 3711 | LRLDQRVQQLFSLMNGILKDKSFCQRN--                        | ITQRTYKVVPIITGHLGIIIEWI       | NNTTPMRYFIEREPRTS[3]----                               | 3779           |
| Query_10011 | 3701 | LRLDQRIEQLFEAMNVLNRDAACSQRK--                        | LAIRTYSVIPVSKKCGLLQFV         | ENTCVLQEVIRDGLSSK[9]-KPLQ                              | 3779           |
| Query_10012 | 3631 | LRQDQRIEQLFNLMMKILDQDPTCRHRN--                       | LSITTYQVVPVSSHLGIIQVW[47]     | GEAHMKYS-----                                          | 3734           |
| Query_10013 | 3826 | LRTDARMEQLFAVMNQALAADPACGERG--                       | LSIRTYVVPMTTRIGMLEVW          | PNSCVFKEMINLGMTDA                                      | EREDA 3896     |
| Query_10014 | 3696 | QRQDQRVEILLDIINLLKSDSKYQRN--                         | LSIKTYQVVPMTSKLALIEWL         | PETKPLKVIENDLVNE                                       | AQNNY 3766     |
| Query_10015 | 3713 | LRTDQRMEQMFLLMNSIYARSPLCTKASV                        | PSLDTYQVIPLSLRVGLIQVW         | DSTQPLKDFINDSYREN                                      | ETKCY 3785     |
| Query_10016 | 3744 | LRQDSRIEQLFVDMNDIYQCNALCFQNK--                       | LHLKTYQVIPLTTIKIGLIEWV        | DNTNVLGSFLKDAMTDK                                      | EKESF 3814     |
| Query_10017 | 3797 | LRLDQRIEQLFETMNVKLSDDPICSQR--                        | LNLRTYSVIPTPRVGLIEWV          | RNTMPLKDFIQLSDPEK                                      | KSLPA 3867     |
| Query_10018 | 3763 | LRLDQRIEQLFCVMNEILAQDSICSQD--                        | LRLRTYQVIPITQRLGLIEWM         | KNTITLKEFVTDAMEDH                                      | EKQHY 3833     |
| Query_10019 | 3802 | LRLDQRIEQLFGLMNDIMANDSACSQRG--                       | LRLRTYQVIPMTPRVGLIEWM         | NNTKPLKGVVNSAMTKA                                      | ENDHY 3872     |
| Query_10020 | 3598 | LRLDQRIEQLFVDMNQIFKADPRCRDQK--                       | LSITTYVVPMTQEIGLLEWI          | DGTSTLKGVLVEAQLQID[1]RCVGL                             | 3669           |
| Query_10021 | 4044 | LRQDQRIQALGLFNLSLQRDIQCLRLR--                        | LSLVTYQVVPVPLSDPLGLEWL        | ERTQPYKDFLVHQMSAA                                      | EQRSH 4114     |
| Query_10022 | 3856 | LRLDQRVQQLFQIINSIFKDDAQQRND--                        | LYIKTFKVVPTINRLGTFLEWV        | DDTEPMKSLINREHMRN                                      | EAGKD 3926     |
| Query_10001 | 3806 | QNK-NLPNNPANLCCQWIG-dsS-NTRQMI                       | ENYRKYQKYSRNETLNAFKKREAMVPWDM | LKRSYQLASSPESYFVLRG                                    | 3882           |
| Query_10002 | 3894 | NSR-HGPRYQHSEWVDKYAKgnQ-SNH--                        | GVRYGAVYRHANYTDTVKCFRSEALVP   | WDLMRRAFIQLSASPEAFITLRS                                | 3969           |
| Query_10003 | 3904 | LHQ-RLPLIDFDAYVHRLG-gtV-KNDP                         | WGKVVYGLYQKASRTDVTLAFRQVQSK   | VTDIMRRGYLQMSASPEAFITLRS                               | 3980           |
| Query_10004 | 3829 | LSdpRAPPCYKDWLTKM----S-GKH                           | DVGA-YMLMYKANRTEVTVSFRKRESK   | VADLLKRAFVRMSASPEAFITLRS                               | 3902           |
| Query_10005 | 3844 | QQEvLP---KYREWLOQM---A-GRK                           | DMFLRYPTMYLKSARTEVTAFRTHEQA   | IPDGLLRRAFIKMSTPEAFITLRS                               | 3915           |
| Query_10006 | 3784 | LGD-QGPGKHENWYKYF--da-KKRC                           | IKSMYQVYQNSRAETIKDFRMKENK     | VPWDLFRRAFHQMSASPEAFVLRG                               | 3859           |
| Query_10007 | 3817 | -AQ-QKAAILQRNFLSRYG--np-SD                           | PNICCKYWGMYERCSTRTEAVKSCQDK   | ENSLPWDLRRAYLQMSASPEAFITLRS                            | 3891           |
| Query_10008 | 3680 | AME--MFTEGPEKILLKAA-geG-SS                           | PLNHLTYWRSFQNI TPEAARCFNEV    | LKIPDHLLRDLQLLNCVSPDVFCFLRR                            | 3755           |
| Query_10009 | 3858 | SLsMEAYKIHNENWISNFGkyiKm                             | ANPPAGPLYQQMFMSDRADAIKKQEK    | QHDKVPANLLQNGIWAISSPESYIFIRN                           | 3937           |
| Query_10010 | 3780 | ----DDAQSMHSRWVQYK-----                              | SYHNMFMENVNRDAVVQHFKDLQRE     | ISNDMLKALYKLSASPEAHLIRS                                | 3843           |
| Query_10011 | 3780 | ATSeTLKKEIQHEIYEWVrk-G-GGKS                          | QTEPCYNLYRKVGFEEVSLKLSALQ     | QGLPWDTLRMGFSRLVTSAESYALRS                             | 3857           |
| Query_10012 | 3735 | -----PEETS                                           | AEPFRKKNMIPWDIMRRALQRLS       | VSPESYIFILRQ                                           | 3773           |
| Query_10013 | 3897 | KKR--KATQLPQNHFQFAnrfs-KD                            | PSPLMKSSVMTKAKRSDISRSLERQ     | ALVRPTLLRDALLHLSATPEALYTRRQ                            | 3973           |
| Query_10014 | 3767 | AE-----FIYGNKDG---S-K-KT                             | QSEVGMVYAKYSRELICREFDKIQNS    | IPWDLFRQFLRTLSDSEAYFVLRN                               | 3833           |
| Query_10015 | 3786 | GEA-----RALYKNE-----                                 | NYTVAKKAKRVDVIKAYEEVNVN       | IPWDLVLRGLVLRMSSTEGFSLRS                               | 3844           |
| Query_10016 | 3815 | RES-DPKMTFYKFLLSKTN---S-R                            | DKSIPLLYENIY-KIADTEVNKKFTE    | CINIPWDLFRRAFLKFSASLEAFVILRY                           | 3888           |
| Query_10017 | 3868 | ASK-----MNQKWLEQKF-----                              | GGSNYVNYEMYKKLKADBEVKKEY      | RRIIVSAVPWDLRRSLISLASTSESFLLRG                         | 3936           |
| Query_10018 | 3834 | LSSgNSPHQLYSKWLGKF---gs-AG                           | GPVYM-YQSMYRKAKRSEVENHFK      | RENSEVPWDLRRGFVALSASSEAYMLRS                           | 3908           |
| Query_10019 | 3873 | IGP-NGAGACYRNWDKPKF--gd-PR                           | NSPRT-YGEMFKKANRTEETERSF      | TQKQALVPWDLRRRAFLQLAVSPEAFILRS                         | 3947           |
| Query_10020 | 3670 | KSNnSQKLDLNFNTAAKAYes-F-L                            | LEQRGATYSAKVVASRSEEDVVDH      | FAKVHAMIPDILLRQLLKLGS                                  | TSVDFVLRD 3747 |
| Query_10021 | 4115 | SKQ---SLDYCKFVSNDHck-----                            | LYTSLDQQVVQRNFPQLLDCVPD       | CLLARGLRQLSSWEAYAMRD                                   | 4176           |
| Query_10022 | 3927 | LNQ-SRALNERRRKWLKSSVpg-N-<br>AKKGETDQHCILLCDEKIVIEGF | NKHKEAIPWYLLRNLGLENLCLT       | SSAFLAIKN                                              | 4003           |

Supplementary Figure 5: COBALT analysis DNA-PKcs from representative examples from all major phyla (short list)

|             |      |                                                                                       |      |
|-------------|------|---------------------------------------------------------------------------------------|------|
| Query_10001 | 3883 | NCATSHALNCISAYIMGIGDRHLSNHMVDLNGKMAIDFGHAFGSATQFLDIPPELIPFRMTRQLRNLNLLPL-REKGVIE      | 3961 |
| Query_10002 | 3970 | HFARSHAVICICQYILGIGDRHLSNFIISLTKGMMIGIDFGHAFGSATQFLVPELMPFRTRQIVNLMPLP-KKEGLIQ        | 4048 |
| Query_10003 | 3981 | HFTTTHATLCAIQYVLGIGDRHLSNFMIDLESGVMGIDFGHAFGSATQHLVPELMPFRTRQMLNLLPL-KESGLLY          | 4059 |
| Query_10004 | 3903 | HFASSHALICISHWILGIGDRHLSNFMVAMETGVMIGIDFGHAFGSATQFLVPELMPFRTRQFINLMLPM-KETGLMY        | 3981 |
| Query_10005 | 3916 | HFASSHALMCISHWILGIGDRHLSNFMVNLTEGVMGIDFGHAFGSATQFLVPELMPFRTRQFINLMLPM-KESGLLR         | 3994 |
| Query_10006 | 3860 | ELVVTHATISICQYFLGIGDRHLSNFMINLTKGMMIGIDFGHAFGSATQFLVPELMPFRTRQFINLMLPL-GIKGLE         | 3938 |
| Query_10007 | 3892 | HFATSHALLCICHYLLGIGDRHLSNFMVLDTEGVMIGIDFGHAFGSATQFLVPELMPFRTRQFINLMLPL-REKGLIE        | 3970 |
| Query_10008 | 3756 | KFTVSLAMCICIANYLEIGDRHLSNFMIDLESGVMGIDFGHAFGSATQHLVPELMPFRTRQMLNLLPL-KESGLLY          | 3834 |
| Query_10009 | 3938 | SFARSLATFSCISYIIGIGDRHLSNFMIDLESGVMGIDFGHAFGSATQFLVPELMPFRTRQFINLMLPM-DSVGLLS         | 4016 |
| Query_10010 | 3844 | EFIKCHAVINICGYLIGIGDRHLSNFMVLDTEGVMIGIDFGHAFGSATQFLVPELMPFRTRQFINLMLPM-GSKGLE         | 3922 |
| Query_10011 | 3858 | QFARSLSVTSCIGYVAGVDRHLSNFMVLDTEGVMIGIDFGHAFGSATQFLVPELMPFRTRQFINLMLPL-TAVGLLR         | 3936 |
| Query_10012 | 3774 | SFACSYAVLCIAHWLLGIGDRHLSNFMVLDTEGVMIGIDFGHAFGSATQFLVPELMPFRTRQFINLMLPL-EETGLFR        | 3852 |
| Query_10013 | 3974 | LFGRTLATMNICQYILGIGDRHLSNFMIDLESGVMGIDFGHAFGSATQELPIPEMIPFRTRQLEAVFLPH-KKEGLVQ        | 4052 |
| Query_10014 | 3834 | EFIKSYAVASTCHYLLGIGDRHLSNFMIDLESGVMGIDFGHAFGSATQFLVPELMPFRTRQFINLMLPL-EORGLFE         | 3912 |
| Query_10015 | 3845 | AFVSYAALCISQWLLGIGDRHLSNFMVLDTEGVMIGIDFGHAFGSATQFLVPELMPFRTRQFINLMLPL-GQVGLMK         | 3923 |
| Query_10016 | 3889 | NFITSHAVLCISQWLLGIGDRHLSNFMVLDTEGVMIGIDFGHAFGSATQFLVPELMPFRTRQFINLMLPL-KEKGVIE        | 3967 |
| Query_10017 | 3937 | TFIQSLSVNICQYILGIGDRHLSNFMVLDTEGVMIGIDFGHAFGSATQFLVPELMPFRTRQFINLMLPL-KVSGQLR         | 4015 |
| Query_10018 | 3909 | HFARTHATVSIICHYLLGIGDRHLSNFMIDLESGVMGIDFGHAFGSATQFLVPELMPFRTRQMLNLLPL-RENGQLK         | 3987 |
| Query_10019 | 3948 | HFASSHAELCICQYILGIGDRHLSNFMVLDTEGVMIGIDFGHAFGSATQFLVPELMPFRTRQFINLMLPL-KKSGTLQ        | 4026 |
| Query_10020 | 3748 | NFLKSLAVFSACSYVLGIGDRHLSNFMVLDTEGVMIGIDFGHAFGSATQFLVPELMPFRTRQFINLMLPL-DGSPLLA        | 3826 |
| Query_10021 | 4177 | TLVRSHAAMCGAHWLLSVGDRHLSNFMVLDTEGVMIGIDFGHAFGSATQFLVPELMPFRTRQFINLMLPL-PLSGQAFV       | 4256 |
| Query_10022 | 4004 | QFTKSLATFSIASYLLGIGDRHLSNFMVLDTEGVMIGIDFGHAFGSATQFLVPELMPFRTRQFINLMLPL-PLSGVYK        | 4081 |
| Query_10001 | 3962 | GTMVHSLRALRQHEQLISTMDVFIKEPSLDWQNA---KK EIQ A- --MSNRKedtSKLTLDSQ WFP 4022            |      |
| Query_10002 | 4049 | SSMVHTLRALRQNHLELLNTMDVFIKEPSLDWKTNA---SK QAK AQ[3]GrVLEQGsdpDGNLSDES WYP 4115        |      |
| Query_10003 | 4060 | STMVHLRALRSPNVLLNTMDVFIKEPSLDWKNFA---AK QM- --[2]GmVGE----DDDLDLIS WYP 4117           |      |
| Query_10004 | 3982 | SIMVHALRAFSPDGLLNTMDVFKEPSFDWKNFE---QK MLK KG G--SWIQ---EINVAEKN WYP 4040             |      |
| Query_10005 | 3995 | SIMVHGLRAFRLDPLLSTMDVFKEPSLDWKNLE---LK QMK KG G--TWNK---DVNTREIH WYP 4053             |      |
| Query_10006 | 3939 | NTMHTTRALRQDYLLVNTMDVFKEPSLDWLNFA---EK QRN E- --MLMTA---DD-EEST WYP 3994              |      |
| Query_10007 | 3971 | STMVHALRALRANYDLLNTMDVFKEPSLDWLAFA---EK QLQ T- --TMSQ---EDKEDAK WYP 4027              |      |
| Query_10008 | 3835 | STMKYCLKAFRDSYILLNTMDVFKEPSLDWIVEA---RR QIG[1]-- GrTLWNDe--ANLRDSFK WYP 3895          |      |
| Query_10009 | 4017 | HNMHTLTAIQNNKDFLLSTMDVFKEPSLDWIKLAsrlGK[1]QKG[2]KS[3]----- WFP 4071                   |      |
| Query_10010 | 3923 | YPMKIKLQIMQANKDILLNSMDFVKEPSLDWLNRAAndqAK QQR[2]-- --NSNeigEGDSQTV E WYP 3985         |      |
| Query_10011 | 3937 | SDMVRIIMTALRSGRLGISAVMEVFKEPSLDWVQRQAvklQR[1]RAR[4]-- StALEADaganNHMAAFS[3] ]-HV 4008 |      |
| Query_10012 | 3853 | ETMHCRLRTRLNNDMLLATMEVFKEPSLDWLEFA---SR HES[1]-- ----NK---KSHEESQT WYP 3907           |      |
| Query_10013 | 4053 | EVMVHLRALRANQRLLSTMDVFIKEPSLDWQQA---RG DVA -- ---- WYP 4096                           |      |
| Query_10014 | 3913 | SSMVHCLKALRENNDLLVCILDVFIKEPSLDWIGSA---VK IAK[4]ED[3]TlGLQ----- -YA 3969              |      |
| Query_10015 | 3924 | EIMVSALGALQESRHVLTAVLEAFVKEPTKDWLDFV---QK QEG[1]-- ----TQ---DSKVEL-- -FS 3975         |      |
| Query_10016 | 3968 | ATMISALRALRDNADILLNTMDVFIKEPSLDWQENA---LK QKR[10]SD[3]YpGNTESddpNHSECFN WYP 4044      |      |
| Query_10017 | 4016 | SCMHTLRALRHSPTLLNTMDVFIKEPSLDWESNA---KK QAL AQ -----KINTDNT WYP 4069                  |      |
| Query_10018 | 3988 | CSMVHTLRALRKNPDLVNTMDVFIKEPSLDWQNAFA---NR QNA KQ G--LKTE---S---DDFS WYP 4043          |      |
| Query_10019 | 4027 | SVMHTLRALRSHDILLNTMDVFIQEPSLDWQVYA---RK QAK TQ G--INEE---E---QKAD WYP 4082            |      |
| Query_10020 | 3827 | REMGTVDALRSKRVVSEVMNVFLHDPDLDWQSSkikqK[9]DLH[9]KD[6]TrESQRkkaStLPATGN[4]WLP 3921      |      |
| Query_10021 | 4257 | RCLGHCLAAALRRERELVLSVLQVFINDVADWQQLAqmlTA[3]ESS[9]AG[3]AsASSAaaggSGSIASFS[4]WFS 4342  |      |
| Query_10022 | 4082 | QTMVHALNALKHKRKSIMDTCEIFVKEPSLDWVKDAkqrQK[2]ENN[1]--[1]GmVDSLIsEeyEELQELA WYP 4150    |      |
| Query_10001 | 4023 | KEKVNIVRQKLEGNPSHVMRAELALG --QLGSYLKYfviVLMGDK QADIRARLPADG---LSSEQVAALLN 4090        |      |
| Query_10002 | 4116 | REKVNFAQKKLEGANPSDITQRELALG HSRNPAFSAI-KEVVGDR SQNIRASSPKSG---LSVETQVECLID 4184       |      |
| Query_10003 | 4118 | REKIKFAAKKLGQVNPHTITKAELQLG HKNLPWFKSF-CLVAMGDG GKDVRAQKPAEG---LSVEDQVACLID 4186      |      |
| Query_10004 | 4041 | RQKICYAKRKLKAGANPAVITCDELLG HEKAPAFRDY-VAVARGSK DHNIRAQEPESG---LSEETQVKCLMD 4109      |      |
| Query_10005 | 4054 | MQKVRYARRKLEGANFAAITRDELQLG HETEAYSY-VAVAMGDK EHNIRARVPEDG---LSVEIQVDCLID 4122        |      |
| Query_10006 | 3995 | KQKQYALRRFKGDNPFCHITKDELYLG HSRSPAIKHFekCV-LGDA KDNVRATLPSTG---LTVQVEALID 4063        |      |
| Query_10007 | 4028 | KQKVAFARRKLGANPWCITRDELELG HRRG--KTYqAFIAITQG QDNTRTKFAEVD---LTPQVQVACLID 4095        |      |
| Query_10008 | 3896 | EKISAAARKLRGDNPFVIMQDELMNS[3]LSFPLHQI--NCIYGKK[8]DQSPARGYPLQA---LTVBQVTSCLIE 3974     |      |
| Query_10009 | 4072 | KEKVDIARRKLERWNPAYITSEELANS[1]HGQIYEKSI-QNVVKGDP[1]-HNIRAKACQIC---STAKEQVDCID 4141    |      |
| Query_10010 | 3986 | RQKLDIARRKLEENFPAYIVCSELEAG HSNKPWFNSI-IKIAKGD[2]-NIRARARQKC---FSVKEQVECLID 4054      |      |
| Query_10011 | 4009 | QKLVETAQCKLDLWNPAYITISELGF[1]HANKPYTRAL-BEIVRGDP[1]-RNIRARVAGNV--cVSVQEQIDCLLD 4079   |      |
| Query_10012 | 3908 | QKQLDLAKLLEGANPVTITTEBELKAG[6]LAK-----F-LECVKGHN --SVRSQMPYSQ---LPLPEQVDSLLD 3974     |      |
| Query_10013 | 4097 | EQKTAFAAKRKLKAGNPAHLLISELESN[3]TSDRSWHRKA-KDIIAGDA QSNIRATMPEHG---LSVEDQVRLLD 4168    |      |
| Query_10014 | 3970 | KDRVNSVKQKLFGMHPSVIMRNDLCSG[1]HKDSKYLYQF-VDVLMGNK[12]SKILAEENGEKRY---LTVIEQVKCID 4051 |      |
| Query_10015 | 3976 | SKRIELNDKLSINFPAYITLWAVS--[4]VAKQAYENL-KQAVLGDG GESVRSVARGYR---LSTHQVVDILLE 4046      |      |
| Query_10016 | 4045 | KQRILFAKRLKLEGNPCYITKEELRLG HSNKPIFQRL-TDVCLGDR -KSLRQNLPKNG---LSVKQVKSLLID 4112      |      |
| Query_10017 | 4070 | KEKVNICRKKLGFNSHMLLDLEHG FKNKPEFKYL-KGILLGDS STNLRARVGRKC---DSVEDQVDCID 4138          |      |
| Query_10018 | 4044 | REKVTFAKRLKLGANPAFVTRDELRLC HHLST----L-ESFALGDK QYNERARMPADN---LSVEDQVTCID 4108       |      |
| Query_10019 | 4083 | KQKQVSAWRKLEGNFPAYVMRDDLQLG HSKQSWYQOM-ESVCLGDR NANVRAREPESG---LSVESQVSCID 4151       |      |
| Query_10020 | 3922 | NVKTIAARRKLEGVSPALLLLQELSQN[3]HKHLNKYSLvNAASTGED[1]-----ADEiaaLSSLERQAQLLA 3989       |      |
| Query_10021 | 4343 | TEKLVVVRQKLSGAHPQCTLSELLLD[1]HRGKPYTSGM-LAVIDRRR[1]--SVGGDAER---LVPMQAELLVD 4411      |      |
| Query_10022 | 4151 | RKKIEVMKDKLNGLNPVRIKAKELQDS[1]HKKPYFKVI-LNAIKQE[1]--SIRYKLLAQNrryLEVDFIDCLIE 4222     |      |

*Supplementary Figure 5: COBAL analysis DNA-PKcs from representative examples from all major phyla (short list)*

|             |      |                     |      |
|-------------|------|---------------------|------|
| Query_10001 | 4091 | LATDPNILGRTFAGWEPWV | 4109 |
| Query_10002 | 4185 | QATDPNILGRVYAGWEAWM | 4203 |
| Query_10003 | 4187 | QATDPNILGRTWQGWQSPM | 4205 |
| Query_10004 | 4110 | QATDPNILGRTWEGWEPWM | 4128 |
| Query_10005 | 4123 | QATDPNILGRVWEGWEPWM | 4141 |
| Query_10006 | 4064 | QATDPNILGRVWQGWAEAV | 4082 |
| Query_10007 | 4096 | QATDPNILGRAYEGWEPWV | 4114 |
| Query_10008 | 3975 | MATDSVILSRWFEGEAWI  | 3993 |
| Query_10009 | 4142 | QSTDPNILARAWAGWSSWI | 4160 |
| Query_10010 | 4055 | LSTDPYVLGSMWVGWQSWI | 4073 |
| Query_10011 | 4080 | QATDPNLLGRIFAGWQPWV | 4098 |
| Query_10012 | 3975 | QATDYNILGKTWQGWEPWM | 3993 |
| Query_10013 | 4169 | QATDPCILGVTWAGWEPWK | 4187 |
| Query_10014 | 4052 | QSTDTNILGRTWIGWQPPC | 4070 |
| Query_10015 | 4047 | QATDPNILGRSWIGWDPFL | 4065 |
| Query_10016 | 4113 | QATDSGILSRIYFGWDPWF | 4131 |
| Query_10017 | 4139 | HATDSNVLGRTYGGWEAVV | 4157 |
| Query_10018 | 4109 | QATDPNILGRTWQGWEPWM | 4127 |
| Query_10019 | 4152 | QATDANILGRTWQGWEPWV | 4170 |
| Query_10020 | 3990 | IATAPDLLGRTFQGWMPWL | 4008 |
| Query_10021 | 4412 | MATDPALLARTYGGWQPDL | 4430 |
| Query_10022 | 4223 | QSRDPNILGRTWIGWSPYV | 4241 |
