# Supplementary material for: Uncovering DNA-PKcs ancient phylogeny, unique sequence motifs and insights for human disease
Source: PubMed Central journal article supplement — Prog Biophys Mol Biol. Author manuscript; Available in PMC 2022 Aug 1. (PMC8021618; doi:10.1016/j.pbiomolbio.2020.09.010), 2020-10-06
Supplement: NIHMS1638735-supplement-7.pdf [file NIHMS1638735-supplement-7.pdf]

Supplementary Figure 6 CLUSTAL OMEGA ALL PHYLA, EXPANDED

B. Percent Identity

| SEQUENCE    | %ID   | SEQUENCE    | % ID  | SEQUENCE        | % ID  | SEQUENCE   | % ID |
|-------------|-------|-------------|-------|-----------------|-------|------------|------|
| HUMAN       | 100   | PRIAPULA    | 39.13 | MOSS            | 27.12 | PARAMECIUM | 19.2 |
| TASDEVIL    | 76.74 | TRICHOPLAX  | 38.96 | TRICHINELLA     | 27.1  |            |      |
| PLATYPUS    | 75.07 | APLYSIA     | 38.8  | GLOBOSUM        | 27.06 |            |      |
| TURTLE      | 71.85 | LIMULUS     | 37.87 | SYNCEPHALASTRUM | 26.81 |            |      |
| ALLIGATOR   | 70.16 | CAPITELLA   | 37.3  | LIGNANO         | 26.75 |            |      |
| OSTRICH     | 69.69 | SPONGE      | 35.36 | KLEBSORMIDIUM   | 26.73 |            |      |
| GECKO       | 68.51 | SCORPION    | 34.13 | CLUBMOSS        | 26.14 |            |      |
| CANARY      | 67.87 | OCTOPUS     | 34.1  | FLEA            | 25.89 |            |      |
| CAECILIAN   | 67.78 | CIONA       | 33.31 | BEETLE          | 25.84 |            |      |
| COELACANTH  | 65.37 | SPIDER      | 32.97 | AEDES           | 25.48 |            |      |
| STERLET     | 64.82 | ROTIFER     | 32.76 | AMPHIPOD        | 25.26 |            |      |
| XENOPUS     | 64.29 | HYDRA       | 32.12 | COPEPOD         | 25.25 |            |      |
| BSHARK      | 62.27 | TICK        | 31.54 | NEOCALLIMASTIX  | 25.24 |            |      |
| ESHARK      | 62.16 | SALPINGOECA | 30.31 | WHITEFLY        | 24.71 |            |      |
| GAR         | 61.72 | TERMITE     | 29.94 | WHIPWORM        | 24.28 |            |      |
| DANIO       | 58.41 | SHRIMP      | 29.87 | STYLONCHIA      | 23.96 |            |      |
| LANCELET    | 43.55 | MUDCRAB     | 29.6  | MIDGE           | 23.95 |            |      |
| STARFISH    | 42.62 | LOBOSPOR    | 29.33 | BOMBUS          | 23.47 |            |      |
| SEA_ANEMONE | 41.84 | GLOMUS      | 29.2  | STENTOR         | 23.47 |            |      |
| STONYCORAL  | 41.33 | PVIOLACEUM  | 28.96 | DAPHNIA         | 23.2  |            |      |
| SEACUKE     | 41.16 | DPURPUREUM  | 28.57 | APHANOMYCESa    | 22.71 |            |      |
| SEA_URCHIN  | 40.96 | PALUSTRIS   | 28.15 | APHANOMYCESe    | 22.62 |            |      |
| SCALLOP     | 40.12 | HALBUM      | 28.03 | ANT             | 22.07 |            |      |
| LINGULA     | 39.84 | BARNACLE    | 27.77 | BREMIA          | 21.61 |            |      |
| SOFTCORAL   | 39.82 | TARDIGRADE  | 27.65 | PLASMOPARA      | 21.49 |            |      |
| LIMPET      | 39.41 | LIVERWORT   | 27.52 | PYTHIUM         | 20.98 |            |      |
| OYSTER      | 39.36 | FUNGIVORUM  | 27.18 | TETRAHYMENA     | 20.77 |            |      |
| SNAIL       | 39.34 | THRIP       | 27.15 | OSTREOCOCCUS    | 20.07 |            |      |

Supplementary Figure 6 CLUSTAL OMEGA ALL PHYLA, EXPANDED

C. Clustal Omega Alignment All Phyla.

|                 |                                                                          |    |
|-----------------|--------------------------------------------------------------------------|----|
| PARAMECIUM      | -----MNV--LLEKELQKLAAGNYQ-----                                           | 18 |
| TETRAHYMENA     | -----MLEH--LLESALIKLYQGNFT-----                                          | 19 |
| STYLONCHEIA     | -----MEQ--KIDELLRQLHKFLFA-----                                           | 18 |
| APHANOMYCESA    | -----MSQKCHLLD--QVDRSLRQLYDIASSRD-----                                   | 26 |
| APHANOMYCESE    | -----MNDKSNRFX--ELDRALHQLYNIASSKD-----                                   | 26 |
| PYTHIUM         | -----MAEKVRDLR--ELTAYLES-----                                            | 18 |
| PLASMOPARA      | -----MTTKLNERLE--ELTAFLLH-----                                           | 18 |
| BREMIA          | -----MTKLSERLE--ELAAFLLH-----                                            | 17 |
| ADESES          | -----MF-----                                                             | 2  |
| MIDGE           | -----MSDQDVVKRLEKLRQQLKN-----                                            | 20 |
| BOMBUS          | -----ME--SFKTFMDIFERAVT-----                                             | 16 |
| ANT             | -----MD--SYQTFIDIFKQAS-----                                              | 16 |
| WHIPWORM        | -----MVIQ--VLDELWKLQSLKTSADKGD-----                                      | 24 |
| TRICHINELLA     | -----MAYS--TVDRIRDALNSLKDFIEGAD-----                                     | 24 |
| BEEBLE          | -----MDL--SPRDFLKLKYLYDE--EAED-----                                      | 22 |
| BARNACLE        | -----MAVQ--EIQQLFRELOQSVVCR--EELH-----                                   | 23 |
| THRIP           | -----MDKDIESLWLCPLA--KE-----                                             | 16 |
| FLEA            | -----MAS--IVEDTFKDLKCIQT--KQGT-----                                      | 22 |
| WHITEFLY        | -----MA--EIDEILQDLSHIPSE--P-----                                         | 18 |
| TICK            | -----MSE--QIREAL--QRLNAS--DHLA-----                                      | 19 |
| TERMITE         | -----MMGS--ELIGFVEVINSICSG--NHLN-----                                    | 23 |
| DAPIPIA         | -----MEN--LLEDFLFQHSIATCS-----                                           | 18 |
| OSTREOCOCCLUS   | -----MA--DYRALCARADASGD-----                                             | 19 |
| SPENTOR         | -----MER--RVEELLNTHSLTF-----                                             | 17 |
| KLEBSORIDIUM    | -----MET--TLVFYLTTELREDAVK--RSLG-----                                    | 22 |
| CLUBMOSS        | -----MDS--KVSQYLATLNSEAEAA--LKG-----                                     | 22 |
| MOSS            | -----MDK--QLGSCLASLADADSRSVG-----                                        | 23 |
| LIVERWORT       | -----MDQ--KLVRCMTALKDEAAARMGA-----                                       | 23 |
| LIGNANO         | -----MSSD--DIRFVIDKFL--KDPE-----                                         | 18 |
| COPEPOD         | -----ME--RLEEDVGELECELLSHLESSPGDIQ-----                                  | 26 |
| GLOBOSUM        | -----MADDLITQLEQLSRP-----                                                | 15 |
| PALUSTRIS       | -----MASQ--AAVE--NLRRLVELNECVKSATITSTK-----                              | 31 |
| NEOCALLIMASTIX  | -----MSTNIDI-----LRNLLNELSINRDK-----                                     | 23 |
| GLOMUS          | -----MS-----GLD--TLQKCLQELANCRQIVQKSSFG-----                             | 28 |
| LOBOSPOR        | -----MNSQLDLRL--SLVELDEMGENPDVNSQ-----                                   | 30 |
| SYNCEPHALASTRUM | -----MS-----VSV--SIEACLQDLSEALRISLSLK-----                               | 25 |
| FUNGIVORUM      | -----MTKSPGSMRNPYI--SPSCDTP--MNGENHR--HLEILLAGI--PHLLGPNGETQGGKDVTD----- | 56 |
| HALBUM          | -----MFKNMN--NVDSIYQ--RIDGYLVKLHQSIVGGTSTST--TTATT-----                  | 38 |
| DUPURPUREUM     | -----MNSNNNSNN--NSP--INNNIYQ--RIENYLKFFQTI--TDNQSOS--IDTTN-----          | 45 |
| PVIOLACEUM      | -----MNNNSNSNSNE--QVTTKLN--VNNGIYQ--KLSNYLRKLYDVKF-----                  | 43 |
| AMPHIPOD        | -----MATE--SHN--EVQILLDKLENLVYNDNDS-----                                 | 26 |
| SHRIMP          | -----MAGGGREE--ELDLLLLKQLQSPGPGQG-----                                   | 27 |
| MUDCRAB         | -----MAGGGRE--V--QDLLEKLLHHYSSGNELR-----                                 | 26 |
| TARDIGRADE      | -----MASR--QVLSAVEELSAIVSATP--SL-----                                    | 23 |
| HYDRA           | -----MSG--ELTRLEETIFLLRTKNS-----                                         | 20 |
| SALPINGOBECA    | -----MAAARS--ELERLCRNLEEQRLSASPR-----                                    | 25 |
| SPIDER          | -----MG--DFLDDLQSHLDALFKAQSD-----                                        | 22 |
| LIMULUS         | -----MTHCYG--RKYQLLSLOECLDINSQV-----                                     | 26 |
| SCORPION        | -----MNEITN--SLHENILKLNDFIKYQDEG-----                                    | 26 |
| ROTIFFER        | -----MN--DLEKHQNLFDLSLNSN-----                                           | 19 |
| CIONA           | -----MA--RLRECLTKLQSLDSD-----                                            | 19 |
| OCTOPIUS        | -----MAR--EI--KRIEQCLNDLWN-----                                          | 17 |
| CAPITELLA       | -----MAR--ALQEQLAGLVSDTRGQ--PGV-----                                     | 22 |
| LIMPET          | -----MAGS--LLEESLRLHANLKGQSQE-----                                       | 24 |
| SCALLOP         | -----MAAS--LLENNLRSLHKLKAGDASA-----                                      | 24 |
| LINGULA         | -----MAG--NLQDLCLTLHSCVGGEEEDA-----                                      | 23 |
| OYSTER          | -----MAAS--LLEDNLRSLNECLTTADNSS-----                                     | 24 |
| SNAIL           | -----MAA--TLEETLRLSHDQ--SGASA-----                                       | 20 |
| SPONGE          | -----MESRLESLEWELHSSP--Q-----                                            | 18 |
| FRIPAPULA       | -----MARTV--REEDHVQTLLESPODREA-----                                      | 25 |
| DANIO           | -----MAADTSTVG--GIQGYLLKHLHSLLEDVSTN-----                                | 29 |
| ESHARK          | -----MAGPRGAAA--DTLSAFSKLHLLSLSDVKS-----                                 | 29 |
| BHARK           | -----M--ADGMRRHGAVGL--EVERRLQQLQLLSAQDSRS-----                           | 34 |
| XENOPUS         | -----MLLAGAGGSSGDG--QDGVASGPAESAA--GILGRLHQLHGLLSL--ESGV-----            | 45 |
| STERLET         | -----MA--QPGSCSVGAG--GIQGNLHKLHSLFNATDAKS-----                           | 32 |
| GAR             | -----MAGSGG--GIQGYLKLHSLCAGETKQ-----                                     | 26 |
| HUMAN           | -----MAGSGA--GVRCSLLRQETLSAADRCG-----                                    | 26 |
| PLATYPUS        | -----MAGSVP--GPQGSLLRQRFLEAEDAGV-----                                    | 26 |
| TASDEVIL        | -----MSGAGG--GLQGSLLQLQELLSGGDPGS-----                                   | 27 |
| COELACANTH      | -----MA--EEGSPSAVE--GVSGLLKHSSLTVDTKS-----                               | 32 |
| CAECILIAN       | -----MS--VPGVGGDSAV--GVQGSLLRLHSLSSKDPGL-----                            | 32 |
| CANARY          | -----MA--GVQQLLQLHRLCQPGDAGG-----                                        | 22 |
| OSTRICH         | -----MCS-----                                                            | 3  |
| GECKO           | -----MAIS--LPVA--GG--GLQGLLQLHGTQSPDPAS-----                             | 30 |
| TURTLE          | -----MAAA--LPVGG--GG--GIQGSLLHQLSCALQDPDPT-----                          | 31 |
| ALLIGATOR       | -----                                                                    | 0  |
| APLYSIA         | -----MAA--NVANFLQSLHDFIDASI--SS-----                                     | 22 |
| TRICHOPLAX      | -----MAS--NLSQLLIDLHALLNLQS--LH-----                                     | 22 |
| SOFTCORAL       | -----MTE--VIDRYLNQLNSCLKTLSSSR-----                                      | 23 |
| STONYCORAL      | -----MSD--LLNRYLTHLHSLPDL--DAPH-----                                     | 22 |
| SEA ANEMONE     | -----MTD--AISSRLQLNELVAESPLR-----                                        | 23 |
| SEACUKE         | -----MAVP--QISAKLSDLYELLKSSRDTP-----                                     | 24 |
| LANCELET        | -----MAGSG--SLEARLSELHALLAESDGH-----                                     | 25 |
| STARFISH        | -----MATA--DLPVKLSELNGLISTKSLH-----                                      | 24 |
| SEA URCHIN      | -----MAAA--ELQRHLAELHEVIDSGGTAH-----                                     | 24 |

Supplementary Figure 6 CLUSTAL OMEGA ALL PHYLA, EXPANDED

|                 |                                                              |    |
|-----------------|--------------------------------------------------------------|----|
| PARAMECIUM      | -----RASDIKDS---IEN---ILFENQL--NH----                        | 38 |
| TETRAHYMENA     | -----DSKIVQA---ISD---ILLDETL--DD----                         | 39 |
| STYLNCHIA       | -----DSEQVNE---LRI---YILDESL--KE----                         | 38 |
| APHANOMYCESa    | -----VEVDKDTIESFVAALFRRSVRCLES-----                          | 52 |
| APHANOMYCESe    | -----VEVDKDTIESAVTTLFRRATRNLSLE-----                         | 52 |
| PYTHIUM         | -----EHAVDSEESVEHLQLAVADAMARS-----                           | 43 |
| PLASMOPARA      | -----AQAVESIDEITLSHLRLEVESEAMLS-----                         | 43 |
| BREMLIA         | -----EYAVDSVEETLAHLQTEVEEAMALS-----                          | 42 |
| AEDDES          | -----KRFEHVRHWS---TPSPSRA-----                               | 19 |
| MIDGE           | -----KNQSKCLEI---IGILTEHIEGLA---SP-----                      | 43 |
| BOMBUS          | -----ERNSTNLTE---ILKDSKYYFQNI---AK-----                      | 39 |
| ANT             | -----HOYFKDLPN---TLKDDQQYKLV---SL-----                       | 39 |
| WHIPWORM        | -----GAALQAIEDLQD---IKH---LLSPFSG---QE-----                  | 48 |
| TRICHIANELLA    | -----S---DQAEDCVQO---IPN---HPHLNG---SE-----                  | 46 |
| BEEBLE          | -----VASKQCNQLLTN---FSD---ALTHEQI---NS-----                  | 46 |
| BARNACLE        | -----GDPERAIGLILN---IKR---YLSEQF---TD-----                   | 46 |
| THRIP           | -----HDAKILHR---IAC---HFQNYF---TS-----                       | 36 |
| FLA             | -----KAKLCISN---ILR---FFKGEV---TS-----                       | 41 |
| WHITEFLY        | -----D-AQAAENYKQR---LIA---LFSHFKA---QV-----                  | 41 |
| TICK            | -----E-ALPLAEEVER---T---CVEQSF---SV-----                     | 39 |
| TERMITE         | -----K-YIEAKNSISN---IIS---YFEDKR---KR-----                   | 45 |
| DAPHNIA         | -----NVAEQVND---IKE---IVLKEK---ID-----                       | 35 |
| OSTREOCOCCUS    | -----GGATSTSGTISV---IRE---RCSECT---ID-----                   | 42 |
| STENTOR         | -----TOPESIIDE---IRA---IVLSFNL---SM-----                     | 38 |
| KLEBSORIDIUM    | -----SAEELVRRVED---IAD---LCTNLT---SE-----                    | 44 |
| CLUBMOSS        | -----SETDLGVTVDD---LSG---PCSOLV---SD-----                    | 44 |
| MOSS            | -----GFPDLAPVVD---FSE---LCKDLY---SD-----                     | 45 |
| LIVERWORT       | -----SASDLNSLISD---VAD---LCKQAL---SD-----                    | 45 |
| LIGNANO         | -----LKEKA---LFN---VIFNEFASSNE-----                          | 38 |
| COPEPOD         | -----TLNSAELLARS---VYG---LLESEL-----                         | 45 |
| GLOBOSUM        | -----DIAEA---AVVD---LQN---QIVRM---HA-----                    | 34 |
| PALUSTRIS       | -----ALA---EG---IQA---ALGDL---DH-----                        | 46 |
| NEOCALLIMASTIX  | -----SISVE---LYN---PPYKML---NN-----                          | 39 |
| GLOMUS          | -----EAVGEALRYSQD---IDH---IVSNDI---ED-----                   | 51 |
| LOBOSPOR        | -----VIATN---ICS---M-VMEL---KE-----                          | 45 |
| SYNCEPHALASTRUM | -----SIASD---LAT---RVMAV---DD-----                           | 41 |
| FUNGIIVORUM     | -----APAMVDQLTSECTPISEAINSSKDFEGD-----VE---LI-----           | 88 |
| HALBUM          | -----ATAAITS---ASGNSNNFSAIDKDGMLIEQ---LSN---VVLKELA---E----- | 77 |
| DPURPUREUM      | -----NNLI---INNNNSFK-FENDLLLINE---LSV---ILLKELV---LD-----    | 80 |
| PVIOLACEUM      | -----VNNKNASNSLESDSVILIEE---LKN---VLLKELV---ME-----          | 75 |
| AMPHIPOD        | -----NGGFAKDIIVD---LSE---LLSSDT---TS-----                    | 48 |
| SHRIMP          | -----DPDAAKDVID---IAE---LLAVDL---TP-----                     | 49 |
| MUDCRAB         | -----NARSARDIVVD---ISE---HLTKDL---SP-----                    | 48 |
| TARDIGRADE      | -----STDDNACDAVEQ---IGR---ICLAET---GL-----                   | 46 |
| HYDRA           | -----DSIEVSTLANN---IFS---LALNI---AD-----                     | 41 |
| SALPINGOEA      | -----RFIAAAAIAD---IAA---YTRTLT---TP-----                     | 47 |
| SPIDER          | -----SISEKEVSILETI-QKLHD---DYLNFDL---KE-----                 | 49 |
| LIMULUS         | -----EKADNIIKD---IYY---ICMDSRM---SE-----                     | 47 |
| SCORPION        | -----HSSIVIKD---ISE---ICLRGTL---SE-----                      | 47 |
| ROTIFFER        | -----VDAAKSVLDD---IVY---LCENL---NP-----                      | 40 |
| CIONA           | -----YIQVEVQIKE---ISQ---LCNRF---SK-----                      | 40 |
| OCTOPUS         | -----GKDRKQIVED---IAL---ICPNQL---TV-----                     | 39 |
| CAPITELLA       | -----VNARISHESIGN---IGA---ICLNDV---NA-----                   | 45 |
| LIMPET          | -----LDQIDSIVPT---LSQ---ICLHEI---TE-----                     | 45 |
| SCALLOP         | -----VEQSNGISD---ISQ---LCLHEI---DD-----                      | 45 |
| LINGULA         | -----RGGKRTFDLVRD---IAN---LCLKET---SD-----                   | 46 |
| OYSTER          | -----KEQADSVAD---ISQ---ICINES---TD-----                      | 45 |
| SNAIL           | -----YNLANGLIAD---IRQ---ICLHEI---SE-----                     | 41 |
| SPONGE          | -----RYSYATEVAD---LYS---LCVEQI---TE-----                     | 40 |
| PRIAPULA        | -----DPETAHSAVAD---LAH---KCLQDI---SK-----                    | 47 |
| DANTO           | -----VAIVCHDIIGD---LGO---ECMITK---NE-----                    | 51 |
| ESHARK          | -----AAAEHSIVAS---ISR---DFRCSIS---SD-----                    | 52 |
| BHARK           | -----AAVESHSIVAN---LTH---DLH-NT---HE-----                    | 56 |
| XENOPUS         | -----GAEGHSLHNN---LAE---ECLVSAL---GS-----                    | 68 |
| STERLET         | -----AAVESHNLIIGN---LGO---ECMYSK---NE-----                   | 54 |
| GAR             | -----TALECHSVIGD---LGO---ECLVVR---NE-----                    | 48 |
| HUMAN           | -----AALAGHLIRG---LGO---ECVLSS---SP-----                     | 48 |
| PLATYPUS        | -----SAVAAYLIRG---LGO---ECVLSA---GP-----                     | 48 |
| TASDEVIL        | -----AALAAYHLIRA---VGO---EGVLCT---SP-----                    | 49 |
| COELACANTH      | -----AAIEISNIFGN---LRQ---ECLVTS---DE-----                    | 54 |
| CAECILIAN       | -----EAPVAQSLIRS---LGE---ECVTSS---GD-----                    | 54 |
| CANARY          | -----SALHGYSLLRS---LAE---TCLASL---AS-----                    | 44 |
| OSTRICH         | -----ERKD---VQA---DCVF---A-----                              | 15 |
| GECKO           | -----AALHGHSLLRS---MAE---TCVTSS---GD-----                    | 52 |
| TURTLE          | -----AALRGYHLIRG---VGE---ACVTST---GD-----                    | 53 |
| ALLIGATOR       | -----MA---ALV---PVVIRT---GD-----                             | 13 |
| APLYSIA         | -----NREQIEVIDD---IRQ---VCQHEI---KE-----                     | 44 |
| TRICHOPLAX      | -----RGSNACDIASD---ITV---LCLQTA---SD-----                    | 44 |
| SOFTCORAL       | -----GRE-AADICRD---LRL---YCIENI---NE-----                    | 44 |
| STONYCORAL      | -----CGLDASNTVVD---LGS---FCLENV---SS-----                    | 44 |
| SEA ANEMONE     | -----GQESA-EIARD---LRA---HCSQLR---DE-----                    | 44 |
| SEACUCU         | -----AAEEAKNVIVD---LGH---VLLRPL---SD-----                    | 46 |
| LANCELET        | -----GAVEAHNLVAD---IAQ---ICLRHT---AE-----                    | 47 |
| STARFISH        | -----VAEKAQDLVVD---LGH---LCLRQL---SE-----                    | 46 |
| SEA_URCHIN      | -----GPETAQDLVVD---IAQ---LCLNQT---RE-----                    | 46 |

Supplementary Figure 6 CLUSTAL OMEGA ALL PHYLA, EXPANDED

|                 |                                                                   |     |
|-----------------|-------------------------------------------------------------------|-----|
| PARAMECIUM      | ----AFI-GLCSSKIMASEK----- <b>FLIEFL</b> TNHVLDK---D-----TYAQT     | 73  |
| TETRAHYMENA     | ----SQI-SLCNSKIFNSDL----- <b>MLFTYLE</b> NNRTYK---D-----NLQAI     | 74  |
| STYLONCCHIA     | ----ADL-APISSKIFNSNS----- <b>SLIFL</b> RENSLHN---D-----KLSSV      | 73  |
| APHANOMYCEsa    | ----RAAAELCCPRLFOTTPGQOHAP <b>LLS</b> IMOL---QD---Y---GTTKSTLGVV  | 95  |
| APHANOMYCEse    | ----RAAAEKCCSRLFHGSSGP--TP <b>SLLD</b> ILQL---QD---T---GLRKT-YATL | 92  |
| PYTHIUM         | ----RGLAQOQTILLFQSHEPP--- <b>SLMEFL</b> DQSGRMS---E---DLRKRISHA   | 85  |
| PLASMOPARA      | ----RASAQOQTILLFQSAEPP--- <b>SLLRFL</b> STSAEFT---D---GARKREISAA  | 85  |
| BREMIA          | ----RASAQOQTILLFQSTDP-- <b>NLLRFL</b> SSSANFA---D---DARKREISAA    | 84  |
| AEDDES          | PPSLPKKT-VYRQYLLDTLINS-- <b>NLLSFL</b> SQRS--IKAS--GR---FKVNV     | 62  |
| MIDGE           | ----SEV-YYAVELLLEWNEQK--- <b>ILVRF</b> LAKSLHLKLS--EK-----FNECN   | 77  |
| BOMBUS          | ----DDS-ELMLSILFDKKK--- <b>GLLSFL</b> MNELGKYKPEK-G-----PDTAV     | 77  |
| ANT             | ----EHF-ESVCSIEDERD--- <b>GLLFL</b> MVLLKQVKKV---D-----VDATL      | 78  |
| WHIPWORM        | ----GDF-DFVVSHPAAKTD--- <b>DLLGL</b> LIRFLPLP---S-----PADGI       | 83  |
| TRICHIANELLA    | ----RNF-GPCFNSLLSND-- <b>NLLS</b> ILSSSIGKT---A-----PAQTI         | 81  |
| BEEBLE          | ----TYL-DQSLHYFFSTSS--- <b>GLHTF</b> VKKLINKK---P-----PKTSV       | 80  |
| BARNACLE        | ----TDF-QFILSVLFPNDIA--- <b>HLMGL</b> LQDVREIK---E-----FGSFK      | 83  |
| THRIP           | ----EDI-DLSLHLFQEEK--- <b>GLKSFL</b> DALS-NS---N---MKKVS          | 69  |
| FLEA            | ----SEI-DFALSILFNEDD--- <b>GLIIP</b> LKQHISEV---Y-----LQESI       | 75  |
| WHITEFLY        | ----DNL-DYDLSALFNEET--- <b>GLITL</b> LHLKLRKT---K-----YKSCV       | 75  |
| TICK            | ----KDL-GYVTSLLAGDAQ--- <b>SLVSFL</b> LKXHVATD---Q-----LKDAK      | 73  |
| TERMITE         | ----TDL-DGAFVLFDKKT--- <b>GLIQF</b> LQKALKQD---A-----FTEAI        | 79  |
| DAPHNIA         | ----NESVIPVLLNRQN--- <b>GLVPL</b> LKSKFRFR---KEGNT---VEI          | 69  |
| OSTREOCOCCUS    | ----GLLASGAIHAFDAER--- <b>GLTAY</b> VRETRNGRA---G-----GGPSA       | 78  |
| STENTOR         | ----FSM-AFFSSKILASEV--- <b>GLLOF</b> LKRRTDS---D-----RLTWT        | 73  |
| KLEBSORMIDIUM   | ----DEL-AFASVLFEDERD--- <b>GLFAFL</b> EAL--P---E---KALAKP         | 77  |
| CLUBMOSS        | ----EDF-AFASAVFDRDT--- <b>GLPCV</b> DRDLRISR---E---RSVHKA         | 79  |
| MOSS            | ----EDI-SYAIIVFDEDT--- <b>GLFSI</b> LESLLRVR---D-----KSVVRA       | 80  |
| LIVERWORT       | ----EDV-SFALALVFDRED--- <b>GLFSI</b> VOLLLSIK---E---RSVVKA        | 80  |
| LIGNANO         | ----NFKHNKYLALFDEPE--- <b>GLVYR</b> LOSKEVS---E---EDAK            | 70  |
| COPEPOD         | ----RTLNDPFWLFIGTD--- <b>GLFPK</b> LKXAGEK---D---FANIL            | 80  |
| GLOBOSUM        | ----DRK-PLAMSALFNKQQ--- <b>GLLOL</b> LRTNKDAF-----TS-KA           | 66  |
| PALUSTRIS       | ----QDD-ALATALLFDAER--- <b>GLQFL</b> RLSLGNK---E---VHND           | 79  |
| NEOCALLIMASTIX  | ----KEI-VYAMSLFNENN--- <b>GLITF</b> LTRTMKYK---E---HAYS           | 72  |
| GLOMUS          | ----QEL-GLATQLLFPQI--- <b>GLIKF</b> LNDTSRVT---D---SVLAKA         | 86  |
| LOBOSPOR        | ----DEI-DMATSLFPNPER--- <b>GLMLF</b> LKRALDKT---E---AHTGA         | 78  |
| SYMCEPHALASTRUM | ----IDR-DIVCSLLFDPEN--- <b>GLLRF</b> MRKNGSTK---D---STAVSA        | 76  |
| FUNCTIVORUM     | ----SSA-SMISLLFVGNH--- <b>GLIKF</b> LKSLGQD---E---KHIKT           | 123 |
| HALBUM          | ----DEI-GVAASLLFHGDH--- <b>MLLKL</b> FLERSVLIN---D---KMIKL        | 112 |
| DPURPUREUM      | ----EEL-GLVASLLFPGDH--- <b>MLLKL</b> LEKSTLIN---T---KEIVKI        | 115 |
| PVIOLACEUM      | ----EEL-ALASSLLFSGDH--- <b>MLLKL</b> LEKSTLIN---S---KEVVKV        | 110 |
| AMPHIPOD        | ----AHY-DVHVSCLG-KN--- <b>GLLQF</b> CQRTVSRK---H---YGDAK          | 81  |
| SHRIMP          | ----AQY-DLYISQVLG-EK--- <b>GLITF</b> GRSVSKDQ---S---FVEAK         | 82  |
| MUDCRAB         | ----VQY-DLFLSHVFG-EK--- <b>GLIAG</b> TRVTKEQ---A---FVDVR          | 81  |
| TARDIGRADE      | ----RDI-KALIPILAEESD--- <b>GLFCA</b> LLADAAGAS---L---V-ATV        | 79  |
| HYDRA           | ----NEI-GYFSETLFNENN--- <b>GLIKF</b> LKLSIGSN---E---LENAK         | 75  |
| SALPINGOECA     | ----PEL-ALAAAILLGSQD--- <b>GLVSL</b> LRQL---E---GLELYECK          | 80  |
| SPIDER          | ----QER-EIGNARIF-CND--- <b>GLLSL</b> LRNLLIVK---E---LRNVK         | 82  |
| LIMULUS         | ----KET-AYMCSLVPNEDL--- <b>GLTVF</b> LKKTASLS---Q---FONGK         | 81  |
| SCORPION        | ----KDR-SYVCSLLRKEED--- <b>GLHFL</b> LEAVNTP---S---LKDSL          | 81  |
| ROTIFFER        | ----QTI-TFCLSLFKEK--- <b>MLLFL</b> RKLTTRD---E---FRCK             | 74  |
| CIONA           | ----QEL-GLYCSLLLNKSS--- <b>GLLVL</b> LRNKNVSLA---G---LKPSR        | 74  |
| OCTOPUS         | ----KNI-ESVCTLLFDKEI--- <b>GVVTF</b> LRSNANQP---T---EIR           | 71  |
| CAPITELLA       | ----SDV-DLAYSVIFNHET--- <b>GLIKF</b> LKLIQND---E---FEGCK          | 79  |
| LIMPET          | ----KDI-DYCSSLFDKEI--- <b>GVVTF</b> LKIKSKKN---E---YQGSNA         | 80  |
| SCALLOP         | ----KEI-DLCCSALFDKDK--- <b>GLITF</b> LKKTVNDK---E---FLGCK         | 79  |
| LINGULA         | ----RET-DYCSSLFPNKDT--- <b>GLVSF</b> VKXVQKA---E---YDSTK          | 80  |
| OYSTER          | ----KDI-DLCCSALFDKDK--- <b>GLVSF</b> LSETVTKK---E---FQTCCK        | 79  |
| SNAIL           | ----KDR-DYCCSALFDKDI--- <b>GLIAP</b> LQVAAKD---E---FQSTK          | 75  |
| SPONGE          | ----SEL-AYSSSVLFPNDN--- <b>GLIKF</b> LHDVTLE---E---FASCK          | 74  |
| PRIAPULA        | ----RDV-DLTCVLPFSEDR--- <b>GLVFL</b> LRRAIPLD---E---FKLAK         | 81  |
| DANTO           | ----NEL-VLQTSLLFAKEE--- <b>GLLSF</b> LRRSLSTE---KLGTTGVEILRETR    | 93  |
| ESHARK          | ----SQL-ALQSSVFSKDT--- <b>GLVFL</b> LRKSLRFE---E---FRDGR          | 86  |
| BHARK           | ----SRL-ALHSSLVFSKDE--- <b>GLLFL</b> LRKSLSNE---E---FRDCR         | 90  |
| XENOPUS         | ----SAL-DLNTSLIFSKEF--- <b>GLLAF</b> VKXSLSSD---E---FKDCR         | 102 |
| STERLET         | ----NEL-VLQTSLIFSKEK--- <b>GLLAF</b> VKXSLNIE---D---FRDTR         | 88  |
| GAR             | ----NEL-VLRSSLLFSKED--- <b>GLLSF</b> LKXSLSSE---D---FRDVR         | 82  |
| HUMAN           | ----AVL-ALQTSLVFSRDF--- <b>GLLVF</b> VKXSLNSI---E---FRECR         | 82  |
| PLATYPUS        | ----AVQ-ALHTSLVFSKEF--- <b>GLVFL</b> IRKSLDIE---E---FRDCR         | 82  |
| TASDEVIL        | ----AVL-ALQTSLIFSKEF--- <b>GLLVF</b> IRRESLSIE---E---FRDCR        | 83  |
| COELACANTH      | ----NEL-ALHISLIFSKEI--- <b>GLLFL</b> LRKSLSSE---E---FRDNR         | 88  |
| CAECILIAN       | ----SVL-ALQTSLIFSKEH--- <b>GLLAF</b> IRKSLGIE---E---FRDCR         | 88  |
| CANARY          | ----GEQ-ALHLSLVFSQEY--- <b>GLLVF</b> IRKSLTIE---E---FRDCR         | 78  |
| OSTRICH         | ----LPA-ALHISLVFSQEY--- <b>GLLVF</b> IRKSLGIE---E---FRDCR         | 49  |
| GECKO           | ----VAR-ALQTSLVFSKED--- <b>GLLAF</b> IRKSLSTE---E---FRECR         | 96  |
| TURTLE          | ----GAR-ALQTSLVFSKDN--- <b>GLLVF</b> IRKSLSME---E---FRECR         | 87  |
| ALLIGATOR       | ----SAQ-ALQSSLVFSKQD--- <b>GLLVF</b> IRKSLSIE---E---FRDCR         | 47  |
| APLYSIA         | ----ET-EVCSLVFAKDT--- <b>GLISF</b> LKQTNQSE---E---IQNGK           | 78  |
| TRICHOPLAX      | ----AEK-AYCSSALFGQDY--- <b>GVVTF</b> LRKSLGLD---D---LDKCK         | 78  |
| SOFTCORAL       | ----TQL-AYCSSLLFNQDD--- <b>GLITF</b> VKAVVQLD---E---FAKCK         | 78  |
| STONYCORAL      | ----SEQ-AYSSLLFSGET--- <b>GLVSF</b> LKXVITLD---E---FQDAK          | 78  |
| SEA_ANEMONE     | ----SELGARCSSILFDKKT--- <b>GLIRF</b> LKHTIANQ---E---FVECK         | 79  |
| SEACUKE         | ----TEQ-AFATSEVPHKER--- <b>GLLSL</b> LKSLIAAKE---E---FTGCK        | 80  |
| LANCELET        | ----RDV-AYCCSVLFOEST--- <b>GLTAF</b> LKKTVTLQ---Q---YLPK          | 81  |
| STARFISH        | ----NEL-AYCCSOLFKNKN--- <b>GLLVF</b> LKNAIPKD---E---LKGSK         | 80  |
| SEA_URCHIN      | ----NEL-AFCRSELFOKET--- <b>GLITF</b> LQKAVSKD---E---YGGSK         | 80  |

Supplementary Figure 6 CLUSTAL OMEGA ALL PHYLA, EXPANDED

|                 |                                                            |     |
|-----------------|------------------------------------------------------------|-----|
| PARAMECIUM      | KKSLYQIIAKYIKNYVQ-----Y--VS-----EYLESIISTCIGNF--KKEE-SGV   | 114 |
| TETRAHYMENA     | RKGLFRPTAAVYIKLRKL-----K--VF-----EYIELICKNCKMSLF--KKEE-SNQ | 115 |
| STYLONCCHIA     | KKKVVYELIIDYIKLRSQ-----E--AT-----PYLKLKDTCLRSF--RSDH-NSL   | 114 |
| APHANOMYCESa    | LGIALEHLITFIKDMQD-----T--TLRHAVAGHVGSITQACCILLSSQL-PSK     | 142 |
| APHANOMYCESa    | LAFTLEHLVTFIKDMHD-----T--IRQSLASHVETLVPTCCNVLTSSQM-ASK     | 138 |
| PYTHIUM         | RKIVLELVGVFKTYSQ-----H--A--AVARTHIVNTMKR--CQATARSQD-SNK    | 129 |
| PLASMOPARA      | RIGVPELLSALFKVYGA-----H--S--ALSQKHVIDLVK--CQQTARSDP-FNR    | 129 |
| BREMIA          | RGVLDLAKFLKVTGT-----H--P--ALSQKHVVLDLFA--CQQTARSDP-YSR     | 128 |
| AEDES           | -EEIFDLRRIIQKHS-----QLVR-----KSVESVRECRFV--QSSVSAR         | 103 |
| MIDGE           | -KRVPFLIQTITKHP-----DKIK-----IYSKNVDTICTIYI--QNVTSAL       | 124 |
| BOMBUS          | -KEAFHLEFLIEQFC-----DIFI-----PYVTGTRKVCQAL--K--TRCSAL      | 117 |
| ANT             | -KEAFHLEFLIEHYI-----TFCFV-----QIQKIKYVCOVL--KKNKANY        | 121 |
| WHIPWORM        | -GIGVDLIRTVICKASG-----I--RSD-----QRKTMICPALKCA-LVDHLKGG    | 124 |
| TRICHINELLA     | -VYGDIIIRLAIARTTS-----L--SPS-----HRKAIMRPTLRLL--KQDYLKGR   | 122 |
| BEEBLE          | -VKFELIYALINNFP-----F--KLK-----KYVSVIFETCFKVI--KSLLVSSD    | 121 |
| BARNACLE        | -VEGCRVTADLVSRAGA-----A--SLD-----CEAAGIRSTACLLS-GRPQETSA   | 125 |
| THRIP           | -SDVNLFEFLIVKLP-----F--SLE-----NYVVIIRDAMSIV--QRTSSSAE     | 110 |
| FLEA            | -KFSLDLILLVLEELP-----I--KIR-----EHIKEISKISIKTL--YTDKMAKE   | 116 |
| WHITEFLY        | -SYTLEISETILKDHK-----N--RVL-----QHVKEIAGFCVKCA-QEDSQSSD    | 117 |
| TICK            | -AKSLNLTGMPFVPA-----S--QLL-----HHALAIKDVSCQLL-FRDKAAKV     | 115 |
| TERMITE         | -KESFTLKLQLDVFP--K-----E--RMS-----CHVVQIKDLCKTCTI-LLEKKAEE | 120 |
| DAPHNIA         | IKNVLEIFGHLEQFIE-----A--MS-----SHLVVINKNSTLQYM--NSK-DAK    | 109 |
| OSTREOCOCCUS    | RVKALETMYECMWRLGERDGGEG-----RIRATMDVVSQV--RREG-SNA         | 122 |
| STENTOR         | MSNALSLVSDYIERGN-----R--IN-----EYVIEIKVCLQMLASSTK--SSL     | 115 |
| KLBSORMIDIUM    | REKALAKYIKRYKD-----R--IA-----PYALIKRYCYDLY--RREP-SNS       | 118 |
| CLUBMOSS        | REKCLVFLGEPVRSVGP-----E--RAS-----LYCSLKENALRIL--RIDE-TRS   | 121 |
| MOSS            | RESCWSFLALFKKIGP-----R--AL-----HYAALLKEKSLTFP--RRED-SKS    | 121 |
| LIVERWORT       | RETSLNPFSEIEKVG-----R--IL-----PHVSPKENCLLIF--RRDD-SKA      | 121 |
| LIGNANO         | -KDGDLFTKLAQSPA-----L--LA-----TSLPKVKCLAESLFFSSIS-SAK      | 111 |
| COPEPOD         | -QDVLRLVLLLEKNPE-----Q--FK-----QHLADPQVLSDSL--FMNP-AAK     | 120 |
| GLOBOSUM        | K---YMLDFAE-----L-----LITCWLFF--SNSKELSA                   | 92  |
| PALUSTRIS       | KAVICKALAGPMYETSS-----S--LR-----EYAIIDIQSICQSLF--SSFKESSK  | 121 |
| NEOCALLIMASTIX  | RQILLNLHLDLENFPN-----Y--LT-----EYIDKIRRISENF--FTEK-AAR     | 113 |
| GLOMUS          | KIALLFLFVIRKIQS-----D--IE-----PYTEIIRKVNHFGLI--NVDD-EAF    | 127 |
| LOBOSPOR        | KVTFLEPTAEFISRSRN-----A--IT-----PYIVDIKRTCLNLF--LNSD-TAR   | 119 |
| SYNCEPHALASTRUM | VTTLLDFVSPFQKAGT-----S--LQ-----RYAPSLKQCQVALI--NAP-SSR     | 116 |
| FUNGIIVORUM     | KESLFLKMLWTIGI-----R--AR-----DYAQEIEVVCQSE--RREQ-SNS       | 164 |
| HALBUM          | KTSILNLSKLIKSPKL-----Q--VA-----DYVVPKISICISLF--RRDQ-SPT    | 153 |
| DPURPUREUM      | KVAIINLITEPIELGG-----R--TD-----DYAIAIKNTCISIF--RKDQ-SNS    | 156 |
| PVIOLACEUM      | KPTLLSISEFIVILQK-----R--TE-----NYALAINKLCISVF--RRDQ-SAS    | 151 |
| AMPHIPOD        | -KSALEVIKILLEKQAS-----K--VA-----QYTDEIFVSVLLY--RGDP-AAK    | 121 |
| SHRIMP          | -KSTLDVKTLIDKEAQ-----K--IN-----KYVDDIRKYTYLY--NVEK-STK     | 122 |
| MUDCRAB         | -NSTLDLITILMKDTK-----K--II-----KYVGDITNYTYFLY--NADK-STK    | 121 |
| TARDIGRADE      | -TAGLQFLIELEAVVQOEALRK--C--VL-----LALPRIWDTYAIW--RICS-AAK  | 125 |
| HYDRA           | -GDILRFLSEFCTKK-----L--VK-----PYIKGIKETCLALF--PCDT-SVK     | 113 |
| SALPINGOECA     | -VAALEFLAGIQRLEPA-----D--RL-----TPYAVRIKDTCTCF--RDK-RAK    | 120 |
| SPIDER          | -LNCFKLANDIESSGS-----L--IG-----EYGFIDLEVCKKYMQRDA-TAE      | 123 |
| LIMULUS         | -LEILDPLPKLLDNVKK-----K--AV-----SYGVRKDACFSVF--LRDQ-FAR    | 121 |
| SCORPION        | -IEALQFNLFLINIGN-----K--VV-----QHGIVTKDVFVTF--LRNQ-LAK     | 121 |
| ROTIFFER        | -VOLLQLEKETSAREK-----K--LL-----PYSPDKDCTCLLF--SSDK-VSD     | 114 |
| CLIONA          | -DLVLTFTVTFVPRVGS-----Y--VL-----QYVDDLRSCLNVF--RSDG-YSR    | 114 |
| OCTOPUS         | -HDILAMLINQKQFGE-----Y--LQ-----PYAADLKGICLKQY--NODD-SAK    | 111 |
| CAPITELLA       | -CEILELKTFSKFPG-----K--VH-----PYAVDVKDAQLQLI--TRDR-RAR     | 119 |
| LIMPET          | KYGLLELSDFIHKVGK-----K--AL-----PYLEIKEASLSNY--MTRD-FTK     | 121 |
| SCALLOP         | -QKLELLESGFIQVEK-----K--IL-----PYTVDIKDVCVSLF--FRDR-FAK    | 119 |
| LINGULA         | -TALLETCLFMERAEK-----K--VL-----PYAVDIKDVCTITLF--IREE-KAA   | 120 |
| OYSTER          | -QKILEFLSEFVQRIK-----K--II-----PYVFDIKDVCVSLF--FRER-LAK    | 119 |
| SNAIL           | -TNLLDFIGDLQKVGK-----K--LL-----PYAIDIKACVSAP--SRDK-YAK     | 115 |
| SPONGE          | -EELLKLSNFKNLSR-----R--VL-----SHIVPIVDVCFIF--MREK-SAK      | 114 |
| PRIAPULA        | -KELLQLHSFINNGQT-----R--IL-----TYAVDIKDTCLAVF--SRDR-QAD    | 121 |
| DANTIO          | -VEIMNFLGAFQRMSA-----T--VRGWEKNYAVELKDTCLVYV--TKDK-SAK     | 137 |
| ESHARK          | -EVLKLESEVERIGE-----A--VG-----RYACIKKTCVIVY--TKEK-AAK      | 126 |
| BHARK           | -EVLKLTPTAVEKIKE-----T--VG-----PYALDIKDVCLVIVY--TKEK-AAK   | 130 |
| XENOPUS         | -EALKFLYTFLEKIGS-----N--VQ-----PYAMDIKTLCVIVY--TKDR-AAK    | 142 |
| STERLET         | -EALKLITPFDRIAH-----K--VNGWEKNYACDIKDTCLVYV--TKDR-AAK      | 132 |
| GAR             | -EEVLKLSSTFLQRITO-----S--VKGWERNYAVDIKDTCLVYV--TKDK-AAK    | 126 |
| HUMAN           | -EELKFLCIFLEKMGQ-----K--IA-----PYSVEIKNTCTSVY--TKDR-AAK    | 122 |
| PLATYPUS        | -EALKFLCIFLEKIGQ-----K--IE-----PYSYDIKSVCSIVY--SKDR-AAK    | 122 |
| TASDEVIL        | -EALKFLCIFLEKIGQ-----K--IE-----PYSYDIKSVCSIVY--TKDR-AAK    | 123 |
| COELACANTH      | -EELKFLTAVPEKIGQ-----K--LN-----PYACNVKLLIFVPV--FFF----     | 124 |
| CABCILIAN       | -EETLFLCIFLEKIGQ-----K--VQ-----PYACDIKNTCTSVYV--TKEK-AAK   | 128 |
| CANARY          | -EALKFLCVFMEKVGQ-----K--IH-----PYACNIKTCTLSVYV--IKER-TAK   | 118 |
| OSTRICH         | -EALKFLCAFLKIGI-----K--VH-----PYACNVKQTCISIVY--TKEK-AAK    | 89  |
| GECKO           | -EELKFLCAFLKIGI-----K--IH-----LIAHDVKNCTIIVF--TKDK-SAK     | 126 |
| TURTLE          | -EALKFLCAFLKIGI-----Q--VH-----PYAHDKQTCISIVY--TKEK-AAK     | 127 |
| ALLIGATOR       | -EALKFLCIFLEKIGQ-----G--VH-----PYACDIKQTCISIVY--TKDK-MAK   | 87  |
| APLYSIA         | -SAALDIISGLIQKVR-----N--VL-----PYAVDIKEATLAVY--SCDR-PAK    | 118 |
| TRICHOPLAX      | -EDLLKLTAYMEKIGG-----K--IS-----PYAVDIKDVCSISLF--TRDK-AAR   | 118 |
| SOFTCORAL       | -EVILSFLAEYIAKVKT-----R--IS-----PYATDIKDIKCLKLF--TKDK-NAR  | 118 |
| STONYCORAL      | -IELLKFLQSVMMKMGK-----K--IN-----PYVVEIKDIKCLKIF--SQDH-SNK  | 118 |
| SEA ANEMONE     | -TELLKFLQSLVGLQNT-----R--VN-----PYAVAIKDIKCMKLL--FQES-SSK  | 119 |
| SEACUKE         | -EALRLIGGLFKKRHA-----H--LV-----EHAVIDKDTCTALY--LRDK-SSK    | 120 |
| LANCELET        | -VETLSFLAFLKIGR-----K--IQ-----PHAVEKVCMAVF--SRDR-LSR       | 121 |
| STARFISH        | -EQLLEFLHAFLLKAGS-----R--LL-----ARTVEIKKICISAF--MRDK-SAK   | 120 |
| SEA_URCHIN      | -VQTFELFLGVLQKAKE-----L--VL-----DHAKIKDVCMSLF--TRDK-LAK    | 120 |



Supplementary Figure 6 CLUSTAL OMEGA ALL PHYLA, EXPANDED

|                 |                                                         |     |
|-----------------|---------------------------------------------------------|-----|
| PARAMECIUM      | LTAGVKGRIFQTLVLLIK-----RFNNDLGE---Q-----GTYLHAFQST      | 193 |
| TETRAHYMENA     | PTQKVKGSIWNLIHILFQ-----FFTDQLED--DLKA-----EIQTCVCKPEL   | 198 |
| STYLNCHIA       | PSATVKGTIWTLIGLLHE-----KYEQ--LN--DFKV-----ESQDVGFQEL    | 194 |
| APHANOMYCEsa    | CTQTVKGVLDVLDGLFN-----KYPDAMAV--HRAA-----VGRWIDQAL      | 223 |
| APHANOMYCEsa    | CTQTVKGVILELIGALLQ-----KYPQEMDS--SREN-----IRSWIEAAL     | 217 |
| PYTHIUM         | ASQTAGTKMLLEVGHHTA-----VFPDEVKT--VALP-----LIAWIEDQL     | 210 |
| PLASMOPARA      | AAQTVKGMLKVIYGLVE-----KFSAECLK--TVSP-----LLGWIEHEL      | 210 |
| BREMIA          | AMQTAGQMLELIGHLVE-----KFPDRDTSG--NVPP-----LLSWIEIEL     | 209 |
| AEDES           | LTRNFQQCLFLELIGLMAK-----DFPECVSE--SRQ-----R-KILDNMRVA   | 183 |
| MIDGE           | PPMRQQHSYQLLGLLSK-----NHPEKFLD--SQA-----I-ELRNQMIATV    | 203 |
| BOMBUS          | VNIKERSLLFSVLDLTIK-----HCPEVSEA--QETH--IIFQQLRNDPFIKQF  | 197 |
| ANT             | YRTEKRFIFCVKIKMK-----YKMYISQ--FTFL--TTLKRANNSASNEY      | 203 |
| WHIPWORM        | LQSGVKKALFILMSVAR-----HLPELLDK--RGKK--YAL-QFANALSEEI    | 209 |
| TRICHINELLA     | LQNGVKKGLIILHSLCQ-----EIPKELIT--ADYN--YAL-LFANIMSEEL    | 210 |
| BEEBLE          | KTDSVEEKTFIALGTFK-----HFQYLVPN--NES-----LRIVFLNGL       | 198 |
| BARNACLE        | APPTVRQQHLGLCALCQ-----HCPQQTAE--LA-----E-RACTALLDEL     | 202 |
| THRIP           | SKPTVLRKVVYLLGALAE-----HLPHDINF--LS-----K-RLLDALMDL     | 188 |
| FLA             | LSSLVYEQLFPLGLILAR-----DFPYEMQD--HVS-----RVQVLLYSQF     | 193 |
| WHITEFLY        | FSNTVKKQVYLLGHLGN-----SYPEVFNs--NP-----E-RFNFVFCIEE     | 198 |
| TICK            | LTPTVKEELICVLGVIAE-----CHQVATEP--YR-----D-KLALYLAEL     | 196 |
| TERMITE         | MPAKVQKHLHLLHIVH-----KYPECLRP--EET-----R-LRLRIYSEL      | 201 |
| DAPHNIA         | NASKSKMEFLMLGRRLAQ-----YFPNTLKE--KASR-----MINQILYEM     | 194 |
| OSTRECOCCUS     | NSKTVRGLILRVIAAHVGMKLGTLVDLGEKVA--EAPTAEW-----LLKASCRVL | 215 |
| STENTOR         | MGSTLKGALFNMHMLVVS-----SFBNELSD--KIEE-----LQIMTIKLL     | 199 |
| KLEBSORMIDIUM   | TTATLKSFTVHMLLVE-----YFPEALHD--Q-IA-----FIMFLATEL       | 198 |
| CLUBMOSS        | TSGLSLRANILLITLAYSIE-----LFPsLYDD--GNVS-----TVRLCLNLT   | 206 |
| MOSS            | TNSTLKANILQLLDLIE-----YFRESFEE--ENVL-----AIIKLCLDIT     | 204 |
| LIVERWORT       | TSGLTRSLILLGLYLV-----YFPHTFSE--ENVN-----TLKICLDIT       | 204 |
| LIGNANO         | TSEGVTOGLYRALGSLCK-----HYPEEFQP--VAVK-----ISVNVVKSLL    | 193 |
| COPEPOD         | LSSTVKSQRLRMLRCLCQ-----FYPVRLKQ--LADR-----LLVNYIQFL     | 199 |
| GLOBOSUM        | LVSSVKCALLELFCACVR-----YYPDSFTI--DKQDPDQIKKRLLTISSCI    | 178 |
| PALUSTRIS       | LTSSVKALLRLLGNISR-----YYPSSIDA--QGIS--HLHH--ILMQCVSTL   | 208 |
| NEOCALLIMASTIX  | LSTSVKGDLLQFLKLIQ-----YSSDIPD--NQKK-----LYTRHCITQI      | 197 |
| GLOMUS          | SGVKAKAGALDMHGHIAH-----RFPYVDF--EKNK-----LIRVF-LANL     | 211 |
| LOBOSPOR        | MVATVKAELVLELHISR-----YFPKVAEK--RQS-----MVVRWCLTIT      | 202 |
| SYNCEPHALASTRUM | ISASVRSKTLIMMFIAR-----YYPDAITD--NDVQ-----TLKRWTLSAL     | 199 |
| FUNCTIVORUM     | SSQTVKGLMELRFLFAR-----QFQKBMND--KICQ-----MHTIFLENL      | 246 |
| HALBUM          | LTQTVKAEELLETVLFTFTE-----YFTGIMFD--KSAQ-----LISIFMETI   | 235 |
| DPURPUREUM      | LTQTVRGEIIVVLLFTFTE-----YFSNHMPD--LNQO-----LSSIFMETI    | 242 |
| PVIOLACEUM      | FSQTVRGEIIVVLLFTFTE-----IFPTHMSE--KNNQ-----ICALLMETI    | 235 |
| AMPHIPOD        | KVPSVHHLELGLLTLFTF-----ALPEKAQS--QAVP-----TLKVLRDQL     | 201 |
| SHRIMP          | KGSTVLQHQLOTLGLMLY-----SYPQNLRH--QSPL-----LTKIFKQGL     | 202 |
| MUDCRAB         | KGSTVLHQQLRGLGLVAK-----VYPENVRG--HSAM-----LTKIYKDH      | 201 |
| TARDIGRADE      | VGITIKQALYGFQTMMAH-----KAPMVANE--FADS-----MFGLLRSEL     | 210 |
| HYDRA           | YSSTMREGLYNLMGSAFAK-----VVPPELMT--INER-----LSSLFLSFL    | 195 |
| SALPINGOECA     | LTQTVKRDMLHGHILIS-----LSPAFAS--SLSTS-----VLNVYSEL       | 210 |
| SPIDER          | LSPKAKEEVLCLGHIAH-----YYPEDFIP--YQER-----VLSMFLQEL      | 205 |
| LIMULUS         | LPPTVKQGLLCLLGLSLE-----YYPEYMIS--YSEK-----LCDLYLNL      | 203 |
| SCORPION        | TPPTVKQAYYLLGLSSR-----HYPCMQGL--CSEK-----LNLWHLKL       | 204 |
| ROTIFER         | LSSSLKANILSILRILCW-----YHPEVISS--KSNK-----CLEFLTTL      | 197 |
| CIONA           | TTSSVCCQVQVLLSLAR-----YFPGHMTT--MSER-----LYEIFLRR       | 198 |
| OCTOPUS         | TKLTVRAKIYLLFPTLAH-----HYPEFMSD--YAKK-----LFDIYLSAM     | 193 |
| CAPITELLA       | PAASVKAHIFHLGVIAE-----LFPKVMVR--GSKD-----LNLNYMTT       | 201 |
| LIMPET          | LTATVKGKIYYMLGVICE-----IYPEYMTT--DSTK-----LLDIYKSSL     | 203 |
| SCALLOP         | VSSTVKENIFVLLGVVAE-----VYPEHMTS--YAER-----FTGLCVTSL     | 201 |
| LINGULA         | HQASVKRELYLLGLFAE-----VYPEGMVN--YAER-----LTDLCVRTL      | 202 |
| OYSTER          | LPASVKESIYVLLGLLAE-----IYPEHMTQ--YAGK-----LVDIYLRL      | 202 |
| SNAIL           | LVPTVKNIGYVLLGVIAE-----VYPEDITQ--DSDR-----LVGLYVSAL     | 197 |
| SPONGE          | HSATIRGGIYHLLGVICE-----WFPPEHLVK--ISSR-----LIDIIYMSNL   | 196 |
| PRIAPULA        | LTSTVKQGVYHLLGVIAE-----SYPELMVA--YADK-----LISIIYVNL     | 203 |
| DANTO           | IPDTVLGCIYELLGVLGE-----VHPSEMVN--NSDK-----LYKAYLGE      | 219 |
| ESHARK          | FPDVLKYEYELLGVLAE-----VQPTMLH--NSEK-----LFCAYLNE        | 208 |
| BSHARK          | LPDVLKYEYELLGVLAE-----VQPTMLD--NSEK-----LYRAYLNE        | 209 |
| XENOPUS         | LSDTVLEKYELLGLLGE-----VQPCEMTY--NSEK-----LFPKFLGE       | 224 |
| STERLET         | IPDVLKYEYELLGVLGE-----VQPSDMLN--NSEK-----LYRAYLSE       | 213 |
| GAR             | IPDVLGNIYELLGVLAE-----VQPSDMTD--NSEK-----LYRAYLGE       | 208 |
| HUMAN           | IPDVLKYEYELLGLLGE-----VHPSEMIN--NAEN-----LFRAYLGE       | 204 |
| PLATYPUS        | ITDVLKYEYELLGVLGE-----VHPSEMLC--NSEK-----LFRAYLGE       | 204 |
| TASDEVIL        | IADTVLEKYELLGVLGE-----VHPSEMVMH--NSEK-----LFRAYLGE      | 205 |
| COELACANTH      | LPDVLKYEYELLGVLGE-----VQPSSEMLH--NSEK-----LFRAYLGE      | 205 |
| CAECILIAN       | VPDVLKYEYELLGVLGE-----VQPSDMLD--NSEK-----LFRAYLGE       | 210 |
| CANARY          | IPDVLKYEYELLGVLGE-----VQPSDMIN--NSEK-----LFRAYLRE       | 200 |
| OSTRICH         | VPDVLKYEYELLGVLGE-----VQPSDMIN--NSEK-----LFRAYLGE       | 171 |
| GECKO           | VPDVLERYELLGVLGE-----VQPSDMLE--NSEK-----LFRAYLGE        | 208 |
| TURTLE          | VPDVLKYEYELLGVLGE-----VQPSDMVD--NSEK-----LFRAYLGE       | 209 |
| ALLIGATOR       | VPDVLKYEYELLGVLGE-----VQPSDMLD--NSEK-----LFRAYLGE       | 169 |
| APLYSIA         | LSATVKANIYVLLGVIAE-----VFPPELMT--YSDR-----LVGLYTSLS     | 200 |
| TRICHOPLAX      | YSSTVKSMSYLLGLTIAE-----KFPYIMP--HAQO-----LTIYLNLT       | 200 |
| SOFTCORAL       | KKSSVSYGYSLLGLTIAE-----YFPEYMD--KADR-----LVQIYVGL       | 200 |
| STONYCORAL      | HSSTVKXWLFSLGLTIAK-----VFPPECVIS--HSDH-----LVKHYVSVL    | 200 |
| SEA_ANEMONE     | QOSTVRFWLYTLLGVFAE-----VFPPEHMLG--NADR-----LISIIYNLL    | 201 |
| SEACUKE         | APQGVKSGLCQLLGVISE-----VYPEEMLP--YSEK-----LTVIYVSM      | 202 |
| LANCELET        | TTATVKSGLSLLGVISE-----VYDMLVQKHPDR-----LLKVYISML        | 205 |
| STARFISH        | LSQTVKQGIYCLLGVIAE-----IYPLVMSG--YSER-----LISVYIATL     | 202 |
| SEA_URCHIN      | LSQSVKGIYQTLGVAFGE-----YYPQLMMH--YSDR-----LNFVIVSTL     | 203 |

Supplementary Figure 6 CLUSTAL OMEGA ALL PHYLA, EXPANDED

|                 |                                                               |     |
|-----------------|---------------------------------------------------------------|-----|
| PARAMECIUM      | -I-----SOIKS---SKPEMVIIEIILKFFKQCLM-YHQ-FNQE-----Q----I       | 228 |
| TETRAHYMENA     | -Q-----VQMAS---QKPEVSVSMPKRYSLK-EIH-LSNK-----E----L           | 233 |
| STYLONCHEIA     | -V-----AQMS---EKPEIKAIIMLKFFTHSLVGECT-LDQD-----Q----L         | 230 |
| APHANOMYCESa    | -D-----KQFSS---NAPEMQIHCFCVLCSEILDEA---TYD---QSK---R          | 258 |
| APHANOMYCESa    | -D-----KQFAS---NSPELQIINGSFTCLAEIITAN---TYD---EGF-----R       | 252 |
| PYTHIUM         | -E-----KQFAA---ASPETLLVAGLLIIMLARLVVDFPSRYKED---ATK-----R     | 249 |
| PLASMOPARA      | -E-----KQFLS---TSPEMMIVNGLFLMARLLKCDAGRYKQD---DAL-----R       | 249 |
| BREMIA          | -E-----KQFSS---NGPEMMLISLFLMARLLECNKERYKQD---EAR-----K        | 248 |
| AEDDES          | -E-----GQLE-E-NYPSLISLAGALQCLTYFLVNFAP-DDAE---EGQ---EQQLNLK   | 228 |
| MIDGE           | -Q-----SLFKDDK-ASISMVVISAVELKSHLIHFTF-TIDE---DPQ---F---S      | 244 |
| BOMBUS          | -N-----PQT---MAHSLDIPQVLDNFNSLITRLTE---K-IEKK---Y---Y         | 232 |
| ANT             | -N-----DILKQ---FKTHKDFHFDLADMLDSVES-PDTV-RRMT---V---F         | 243 |
| WHIPWORM        | -K-----NQMHSGY-RVPAYNVIECFVNLNGCMHFAN-LPDGR-CLM---K---I       | 251 |
| TRICHIANELLA    | -K-----NQMCSSI-HSPSYSVIECFLLNDLLAHFSN-LPDGA-CRM---S---C       | 252 |
| BEEFLE          | -E-----TQMIK---LSSLNKQLSCLFTLDRFCASFPF-DMNSKEDVF---V---V      | 239 |
| BARNACLE        | -K-----ROLDSSRS-AKLEMTIVSIAOCLTCLLHSFQ-SADD---NPV---V---C     | 243 |
| THRIP           | -E-----YQIFH-S-RKVEFTIIECCLDGLTGLHLSFPL-DGST---DSE---R---C    | 228 |
| FLA             | -E-----TQTKN-L-VNTKLRIBHILTNFENMCTFPAP-DPEI---DTE---E---C     | 233 |
| WHITELY         | SK-----RKLDS-D-TAGVSAVLECFYLVVEYMKQFEL-PPQS---KS---Y---G      | 238 |
| TICK            | -Q-----RVC---SVKEKNVVAQCLQCLSGFLHFHGT-CFED---DPD---N---C      | 233 |
| TERMITE         | -E-----MOTSH-A-TAVKYQIIAACLNLTEFLYVFPPL-KPQE---K---E---A      | 239 |
| DAPHNIA         | -E-----KEMKQ---HDYKDRVVGSCLEALRGFLYSFQS-IVSQ---K---S---L      | 231 |
| OSTREOCOCCUS    | -D-----AALDDDEDLKKKEIILIASALDNLTSALTARHQ---ER---DRL---N---N   | 255 |
| STENTOR         | -R-----EELHK---GPKTEKTLAMLLKMAISGLKLFVRY---D---KQ---Q---L     | 235 |
| KLEBSORIDIUM    | -M-----AQAK---S-DKPEMLVAFILDNYSLHICDE-GEFF---GGS-QEM---A      | 239 |
| CLUBMOSS        | -E-----EOLKQSG-KDVTFLVIAAVKLDLSLQWFDN-TVPA---GGT-IEN---S      | 249 |
| MOSS            | -E-----EQLQ---KSPQLVLMASAKLDLSLQWFDN-SLPA---GGS-VEN---S       | 244 |
| LIVERWORT       | -E-----EOLRQSN-KDPLFVLVS-VIKLDLSLQWFDN-SLPA---GGS-VEA---S     | 247 |
| LIGNANO         | -V-----QKIKSDH-TKVQFAVIALFEFLSNYFCHFSL---E---EPD---L          | 230 |
| COPEPOD         | -K-----GCISSKS-GILDITVLEETLILDLDFLLNGGIL---DPE-DVE---N---L    | 239 |
| GLOBOSUM        | -N-----S---ANPDMELLASAVLCLSSYLHSFEA-SAAE---STE---E---C        | 211 |
| PALUSTRIS       | -F-----E---KNPDLQVEGATRALDMLPRADF---DRD---LGI---E---Y         | 240 |
| NEOCALLIMASTIX  | -N-----NFLQNP-K-SFDDYALITSIIYGLNSYLHSNND-IIIE-DKP---E---Y     | 238 |
| GLOMUS          | -K-----E---KSLTDAFTGLYSFLFAYS-D-SIKK---ENQ---E---D            | 241 |
| LOBOSPOR        | -Q-----EQLKPN---AKQELTLVAGLILDNCLYSFAD-KVT---RD---V           | 239 |
| SYNCEPHALASTRUM | -E-----TELKKS---VAEQ-VLS---ALAMCCLLSRDD-VTLD---QQE---L        | 236 |
| FUNCTIVORUM     | -Q-----RQFKS---HKPMQLSLSLSEHFIPOFSDHFVD---TK---Q---V          | 285 |
| HALBUM          | -G-----SOLKS---KTPETFLIKSILSLNLSLNFSSDFISG---SSK---N---V      | 275 |
| DUPURPUREUM     | -G-----QOLKS---KSPETLIQCLKILNSLLVHFSGDFVSN---PK---N---I       | 281 |
| PVIOLACEUM      | -G-----AQLKS---KAPETYLIVCLKILNSLLVHFSGDFVAV---PK---N---V      | 274 |
| AMPHIPOD        | -N-----RH---TGARPDILTILSACVRILTYLHHPFD-GAHD---TPE---L---F     | 239 |
| SHRIMP          | -V-----KH---TGSKPDLNALAVLRGLALYLHHPFE-GIDD---DPQ---L---F      | 240 |
| MUDCRAB         | -A-----RH---MGQKTLIALAGVLRGLTYLHHPFE-GIDD---DPL---L---Y       | 239 |
| TARDIGRADE      | -Q-----KEWNA---KEPKYGIAGCLDPRGLHNFAD-S-DX---GSV---D---L       | 248 |
| HYDRA           | -K-----QEMESTKPKPELLVIAAGLNLGSLVLYHFTQ-SCAE---SSK---Y---A     | 237 |
| SALPINGOECA     | -R-----QMTGT---KAPELPTVECFRLLTAYLKTNPV-SCDP---SARQATP---G     | 253 |
| SPIDER          | -K-----SQMSAKV-KAFNVSTVAGCLLILKEYLYNFSV-MCSE---DTE---N---S    | 246 |
| LIMULUS         | -K-----QMTSKT-RKLEERSIVSCLQCLTYGLHSPFV-SVEE---DPQ---K---S     | 244 |
| SCORPION        | -K-----FHFTS-N-QKSESSIVVCLQCLNEFMHQFPL-QDTE---DTE---K---A     | 244 |
| ROTIFFER        | -K-----NEIMAKF-RKSDLSLALDRLMSYLMNFV---SE-TSD---H---L          | 236 |
| CLIONA          | -K-----LEMEST---KTADLKIIECLLHGLMFTPTS-AHDE---EPV---R---C      | 238 |
| OCTOPOUS        | -V-----AEFRSL---KKPEFLIACLECNKLLSKHTPYDLEE-GVK---K---Y        | 234 |
| CAPITELLA       | -K-----QEIESKT-HEPEYVLIACLOCLTHFMVNFQ-SADE---GAE---H---A      | 242 |
| LIMPET          | -K-----SQMSKT-NKPEMTIISCLLEHTSYLVNFQ-QSGD---D---S---C         | 242 |
| SCALLOP         | -K-----TEMTAKT-RKAELSIIAGSLAGLTSCLVNFQ-SADD---RSK---Q---S     | 242 |
| LINGULA         | -Q-----AEMNKT-GKPEIPVMTGCLLSSILTNFTQ-SAAE---GK---H---S        | 242 |
| OYSTER          | -K-----AEMTST-KKPELSVISCLLEGLASCLVNFTE-D---E-DQ---N---S       | 241 |
| SNAIL           | -K-----AEMTST-KKPEFPVIVCLOCLTAYLVNFQ-SSDE---GSS---H---S       | 238 |
| SPONGE          | -K-----SEMTVKTKKPELPIISCLYGLTAYLVNFQ-SASE---GSV---Y---A       | 238 |
| PRIAPULA        | -K-----NQMSKT-KKPEYPIVITCLRLTTCYLVNFQ-SADE---GSG---Y---A      | 244 |
| DANTIO          | -K-----QMTSST-KEPKLPVVAACLRKILALMVNFQ-SVEE---DPA---A---S      | 260 |
| ESHARK          | -R-----VQMTSAT-REPKLPVVAACLRKILTALMVNFQ-SMEE---DPK---A---S    | 249 |
| BHARK           | -K-----IQMTSAT-RQPKLPVVAACLRKILTALMVNFQ-SMEE---DPR---T---S    | 250 |
| XENOPUS         | -K-----AQMNSST-RNPKFPVIAACLRKILTALMVNFQ-SMEE---DPR---T---S    | 265 |
| STERLET         | -K-----SQMTSAT-REPKLPVVAACLRKILTALMVNFQ-SMEE---DPK---S---S    | 254 |
| GAR             | -K-----SQMTSTT-REPKLPVVAACLRKILTALMVNFQ-SMEE---DPK---T---S    | 249 |
| HUMAN           | -K-----TQMTSAV-REPKLPVVAACLRKILSSLCNFTK-SMEE---DPQ---T---S    | 245 |
| PLATYPUS        | -K-----MQMTSST-REPKLPVVAACLRKILSALMCNFTK-SMEE---DPQ---T---S   | 245 |
| TASDEVIL        | -K-----TQMTSTT-REPKLPVVAACLRKILSALMVNFQ-SMEE---DPQ---M---S    | 246 |
| COELACANTH      | -K-----TQMRSTT-KEPKLSVVAACLRKILTALMVNFQ-SVDE---DPK---T---S    | 246 |
| CAECILIAN       | -K-----QMTSTT-REPKLSVVAACLRKILTALMVNFQ-SMEE---DPK---V---S     | 251 |
| CANARY          | -K-----TQMTSAT-RGPKLPVVAACLRKILTALMVNFQ-SVDE---DPQ---T---A    | 241 |
| OSTRICH         | -K-----TQMTSTT-RVPKLPVVAACLRKILALMVNFQ-SEDE---DPQ---T---S     | 212 |
| GECKO           | -K-----TQMTSST-REPKLPVVAACLRKILTALMVNFQ-SMEE---DPQ---T---S    | 249 |
| TURTLE          | -K-----TQMTSAT-REPKLPVVAACLRKILTALMVNFQ-SMEE---DPH---T---S    | 250 |
| ALLIGATOR       | -K-----TQMTSAT-REPKLPVVAACLRKILTALMVNFQ-SMEE---DPR---T---S    | 210 |
| APLYSIA         | -R-----MEMTST-KKPELAIISCLLEHTAFMLNFQ-SAAE---GSK---Y---S       | 241 |
| TRICHOPLAX      | -K-----SQMTGKN-TKLDMPVIYACLRKILTSYLVNFQ-SVEE---ESK---Y---A    | 241 |
| SOFTCORAL       | -K-----AEMRSK-GKPDMPVVAACLRKILDSYLVNFQ-SVNE---GSI---Y---A     | 240 |
| STONYCORAL      | -K-----KLENLIPMQTRKT-KKPDMLIAGCLRLTSYLVNFQ-SVSE---GSK---F---A | 247 |
| SEA ANEMONE     | -N-----SEMKSNGKSPDKQVIAACLRKILSSYLVNFQ-SAAE---GSK---F---A     | 243 |
| SEACUCIE        | -R-----QQMTSKN-KKPEMTIISCLLISHVLVNFQ-SVEE---DGK---H---T       | 243 |
| LANCELET        | -K-----EQMESRT-RKPEMLVISCLLEHTHVLVNFQ-SVEE---GSA---H---S      | 246 |
| STARFISH        | -N-----QQMTSKT-RKPELTVIAGCLTGLHLYLVNFQ-SVEE---GAK---H---S     | 243 |
| SEA_URCHIN      | -K-----QQMTTKT-KKPEMTVVAACLRKILSHLLVNFQ-SVEE---NSK---H---C    | 244 |

Supplementary Figure 6 CLUSTAL OMEGA ALL PHYLA, EXPANDED

|                 |                                                                |     |
|-----------------|----------------------------------------------------------------|-----|
| PARAMECIUM      | SLLYQALVTFCKPV--E---DLSTFKVPIAACKCMKQNLDI--PSHYLIITK--NAL---   | 276 |
| TETRAHYMENA     | EDLYKMKIGITEI--K---DVKTVSVINNALKVLTAYSHI--PKVQ--LLD-DSK---     | 279 |
| STYLNCHIA       | DALYVCLKTAIQPI--L---DMQHGVMKSAKMLLGTTHINL--FKKH--VTR--HAI---   | 276 |
| APHANOMYCESA    | DTLFPQIHVTLATA---ASGNLSRLAIVKACGLLGGKMHML--FAAN--LVEADPY---    | 307 |
| APHANOMYCESa    | DKLFKYMHVTLATA---TSGNLSRLAIVKSCLLLLGRHIQV--FSEN--IVRSPTY---    | 301 |
| PYTHIUM         | QQVYSYLLTRILATT---VEGQLSRNVTKASLQFLEEHGQT--FIDE--LGE--NGY---   | 297 |
| PLASMOPARA      | KKVYSYLLTIFATT---TNGNLSRYQVNTSAEHFLEKHAQV--FHEE--IGP--NSL---   | 297 |
| BREMIa          | KKIYSYLLTVFATT---VSGNLSRFQVNTSAETFLAKHAQI--PQOE--IGE--NGE---   | 296 |
| AEDES           | RRIYLVKLSQDWD--E---AVKERQAFRNALILLERHSAL--FSPF--LYV--DYV---    | 274 |
| MIDGE           | EKLYECMQLSDPDRLP---NPTTRVAFRNMLQLENYGGLHEIPTF--FFR--DYK---     | 294 |
| BOMBUS          | KELYTWKLELSNQ--K---YSVKVSMKSAINLLSRHIDL--FGDF--VYC--DYK---     | 278 |
| ANT             | HNSYEWIKYFSQTS--S---QKKNITMKSADILLCRIMDL--FRDL--LYP--DYK---    | 289 |
| WHIPWORM        | ENMYSMLKMIINPE--S---RPNRLGPVKAALSILTSHPNL--FRKG--LFR--DYE---   | 297 |
| TRICHINELLA     | SELFNLIKKACNPK--N---DVHRLGHLKAALSILFISRVQF--PRHH--PLD--EYS---  | 298 |
| BEEBLE          | NKVYKYIEFLAIPS--G---T--VKIANKAALTPLANNISL--FINL--MVD--KHK---   | 283 |
| BARNACLE        | GRIFDYVARVINPT--A---ELSRREAPRALALLATHAAQ--FSKH--MYD--RYV---    | 289 |
| THRIP           | NKIVDCLWKTLLLV--D---VH--RKTAPRAALNLLANHGQD--FRAS--LVL--KFE---  | 273 |
| FLAa            | LRLYNMKTMSYYPG--D---VK--FRPAPRAALSLLTKHGML--VSEH--LYK--DCL---  | 278 |
| WHITEFLY        | EKLYKLAKTICIFD--A---NRNRKTYQRAALKMMEIHSGL--KFNK--LVS--DYK---   | 284 |
| TICK            | FKLFKCVKRSITPS--D---RPRYDIPRAALILLSKHAAL--FGQL--LLD--DHR---    | 279 |
| TERMITE         | RRIYDCVTAIVARK---HKEMRVAPRCALGLIQAHHGQ--LAKF--LYD--EYK---      | 283 |
| DAPHNIA         | EKIHGVLMLISRN--S--TVEKKAISFTPKAVLNMLAEHAAL--FNKW--LLR--QYK---  | 280 |
| OSTREOCOCCUS    | ACVVRIVTRAVAVR--V---AGRHMDMTRSALELELSEHVTT--LRHE--FVK--VAP---  | 301 |
| STENYOR         | KDIFPIYKALLTFL-----KVGNIYSKSAKLVLSHNAEM--FKFP--IRE--YSV---     | 287 |
| KLEBSORMIIDIUM  | QLLYKCVTDIV--QK---DDLTRYAVLRSALKLLSRHNSL--FRDL--LIT--DIRKD---  | 287 |
| CLUBMOSS        | KRAYAYLEQVLYR---EDMKRYEMIRAGLRLARHAWR--FRLA--LFK--NSG---       | 295 |
| MOSS            | RRVPTCEBQVWPR---EELKRYEPLKASLRLSRHAGL--FRMR--LIE--SGI---       | 290 |
| LIVERWORT       | RKIYIFLLQVYYR---EDIKRYEVVRAGLRLSRHAGR--FALR--LVE--DSK---       | 293 |
| LIGNANO         | KQVYHLAVKTIAGK---NYQRYEAPQALLFANHCPV--FSAP--LAD--NVE---        | 275 |
| COPEPOD         | ETLYEVLKIKCRM--PDHEAQVSRGSMRAGLEFSAHSSL--FSRI--ILG--DVK---     | 288 |
| GLOBOSUM        | --ILSTIRKMIIP--L---ENQTRYAVPRAGLIFIRDHAEN--FRNQ--LCS--DRD---   | 255 |
| PALUSTRIS       | --IGGYVRMIEP--L---GELTQYSIPKAALQVIDHAAK--LQDP--FFE--NYA---     | 284 |
| NEOCALLIMASTIX  | VITITNLVKVILSID--V---NTLNRYEQIKACLQFVIDNGHY--ISKV--LFR--NCT--- | 285 |
| GLOMUS          | AYIFKCKMNSITM--V---ENDRTYSIVKTGLQYIDHSNI--FGFE--FLR--EYK---    | 287 |
| LOBOSPOR        | PTILQLVKTLYNVV---P---EDLSRFATPIAAMDLFAMHIL--FRSK--LID--IYE---  | 285 |
| SYNCEPHALASTRUM | RQLYEADKTLIDL--P---EKLRYAAPMAALQLFCNHASL--FERH--LIV--DSE---    | 282 |
| FUNCTIVORUM     | QQLYHYVMAIMPP--P---QLVRYDIPKAALDIFSSHGSL--FKQY--LITQ--DAE---   | 321 |
| HALBUM          | QLLYQYLYICLDPV--S---SSORFDIPRAAMMVQRHSHL--FKQY--LITE--QSE---   | 321 |
| DUPURPUREUM     | QLLYQYIYICMDPQ--S---STQRFEPRAAMKIVARHSPL--LAQY--LAE--HSE---    | 327 |
| PVIOLACUM       | QMLYQYIYICMDPV--S---SATRYEVPRAMKII LHSHLL--FKQY--LITE--QAE---  | 320 |
| AMPHIPOD        | ADLYERLHKIINPA--L---NLPKREAPRVTELELHQHAAH--FSSQ--LLK--QHA---   | 285 |
| SHRIMP          | TELYKHHKVLNPD--L---NLPRRDAQRAALELHHTGAK--FSSQ--LFE--DCT---     | 286 |
| MUDCRAB         | KTLFEHVRRKALNPN--L---DLHRRDAQRAALELSSHGDK--FSAQ--LYD--HYD---   | 285 |
| TARDIGRADE      | DMIFSTCRKLIHIS-----DAARYAMIFAAKLLTEHMDK--FLKH--LLA--DKLT---    | 294 |
| HYDRA           | SITMKYVKMILLT-----DYSRYDVPKAALTLALHSSQ--FNEL--LTL--QAE---      | 282 |
| SALPINGOEBa     | VQIYNYVKMAINPD--V---TVKMTRFQVPRALDLFALHAAQ--FRSM--IAT--DFE---  | 301 |
| SPIDER          | YFIFDTARKLISNT--E---KFSKSSAITRAGLQLLAAHAHQ--FNDF--IFE--DCI---  | 294 |
| LIMULUS         | YKIFCYARSSILSS--V---EHSRFEMPFRAGLMLFARHAAQ--FNDP--LFD--DYE---  | 290 |
| SCORPION        | YQLFKFRI--LLSK--R---DVKRYDMAKASLTLSSHASL--LAQF--LYE--DSM---    | 289 |
| ROTIIFER        | RAVFNFKLSLSS--S---EDLSRYAVPKSALMLLKHCRQ--FDEL--LYS--DYK---     | 283 |
| CIONA           | AEIYKYAKTSMQR--E---SLTRYAVPLAAMKIFRDSHSSQ--FSNL--LID--DYS---   | 284 |
| OCTOPOUS        | YELFQAARSAAKPD--L---DLSRYEMPASLILFENHSAP--PIFK--LQD--CYE---    | 280 |
| CAPITELLA       | YSIYKYCVKTDQN--I---KKRYEMPASLGLMAKHSAQ--MSDY--LLD--DFK---      | 288 |
| LIMPET          | YYIYKCKMALKQS--T---TLTRYEVPKAGLHLLSKHASQ--FNEF--LID--DYE---    | 288 |
| SCALLOP         | YEIFKYARMAIDPK--V---DYTRYQVPSAGLKLFTKHAHQ--FSLY--LIE--DYQ---   | 288 |
| LINGULA         | YDIFKCTRMALNLE-----ETARYDLTRAALTLKRHASQ--FSQF--IYE--NHE---     | 287 |
| OYSTER          | YETFKFARMAIDPD--I---NYTRYDVPKAGLKLFRHSAQ--FKSQ--LAD--DYQ---    | 287 |
| SNAIL           | YEIFNYARMAIDHK--V---EFSKYDVPKAGLQLFARHAAQ--FSQF--LVD--DYE---   | 284 |
| SPONGE          | QDIYKYTRMAIDPL--A---NLTRYEVPRAGLSLIRHAAQ--FREY--LVK--DSE---    | 284 |
| PRIAPULA        | RDVYDCVMRCTGQH--L---SEIRRYDVAKSALMLLAKHAAQ--LDRF--LLA--DYK---  | 291 |
| DANTIO          | KEIFDYALKAISQP--T---DKRYAVIPAGLKLFAKHSQ--FGSC--LMD--HYI---     | 306 |
| ESHARK          | KDIFDYALKAINPQ--I---DLKRYAVPLAGLRLFTLHSAQ--FGTC--LMD--NYR---   | 295 |
| BSHARK          | KEIFDCAVKAINKL--I---DKRYAVPLAGLRLFTLHSAQ--FKTC--LLD--SYQ---    | 296 |
| XENOPUS         | KEIFDYVKAISPQ--V---EMKRYAVPSAGLNLALHSAQ--PSSY--LMD--DYQ---     | 311 |
| STERLET         | KEIFDFALKAISQP--T---EFKRYAVLVLGRLFAKHAQ--FSSC--LMD--NYR---     | 300 |
| GAR             | KEIFDYALKAISQP--T---EFKRYAVLVLGRLFAKHAQ--FSSC--LID--NYR---     | 295 |
| HUMAN           | REIFNFVKAIRPQ--I---DLKRYAVPSAGLRLFALHAAQ--FSTC--LLD--NYV---    | 291 |
| PLATYPUS        | KEIFDFAVKAISPQ--V---DLKRYAVPLAGLHLFTVHASQ--FGTN--LLD--NYV---   | 291 |
| TASDEVIL        | KEIFDFALKAISQP--V---DLKRYAVPLAGLRLFTLHSAQ--FSTC--LLD--NYI---   | 292 |
| COELACANTH      | KEIFDYAVMAISPQ--V---DLKRYAVPLAGLRFALHAAQ--FNTC--LMD--NYR---    | 292 |
| CAECILIAN       | KEIFDYSVKAISPQ--V---ELKRYAVPLAGLHMLAIIHAAQ--PGSC--LMD--NYR---  | 297 |
| CANARY          | KEIFDFAMKAINPQ--V---DQKRYAVPLAGLQLFIWHSAQ--FGAL--LLD--NYV---   | 287 |
| OSTRICH         | KEIFDFAMKAIRPQ--I---DQKRYAVPLAGLQLFGRHAAQ--FGTF--LLD--SYV---   | 258 |
| GECKO           | KEIFDFAVKAINPQ--V---DLKRYAVPLAGLHLFVHAAQ--FSTC--LLD--NYV---    | 295 |
| TURTLE          | KEIFDFAVKAINPQ--V---DLKRYAVPLAGLHLFVHAAQ--FGTF--LLD--NYI---    | 296 |
| ALLIGATOR       | KEVDFDSVKAINPQ--V---DLKRYAVPLAGLRFMPGLHAAQ--FGTC--LLD--NYV---  | 256 |
| APLYSIA         | YEIFKYRMAIDPN--I---EHTRYDMPKAGLKLTRHAAQ--FQQY--LMD--DYQ---     | 287 |
| TRICHOPLAX      | ADIYKARLAIDPK--V---ELPRYDLPKAGLNLAKHAAQ--PCDY--ISR--EAE---     | 287 |
| SOFTCORAL       | KNIYSFLRSALDSK--I---NYARYDVPKAGLNLFAHAAQ--YKEY--LTK--DYE---    | 286 |
| STONYCORAL      | KDIYTYGRMAINPQ--V---SLSRYEVPKAGLFLFAKHSQ--FKEY--IAK--DYE---    | 293 |
| SEA_ANEMONE     | RDYIEFTRMAIDVQ--G---TLQRYDVPKAGLNLFRHAAQ--FQY--ICT--EHNV---    | 290 |
| SEACUKE         | LDIYKFASLAMPSP--T---QLLRYGVPEAGLRLFGRHAAQ--FGSL--LYR--DYQ---   | 289 |
| LANCELET        | KDIYNFTRAVASQP--V---EMARYDVPKAAALWLLAKHAAQ--FNEY--LMN--DYE---  | 292 |
| STARFISH        | KDIYRFAARMAIDPT--V---DHTRYELNKAAGLNMFAKHSQ--FGPY--LYS--DHQ---  | 289 |
| SEA_URCHIN      | KDIYQYVMSVDPG--PYRSGTKPRYEIPKAGLNLIRHAAQ--FNEY--LYR--DHE---    | 294 |

Supplementary Figure 6 CLUSTAL OMEGA ALL PHYLA, EXPANDED

|                 |                                                              |     |
|-----------------|--------------------------------------------------------------|-----|
| PARAMECIUM      | -----TLFD---QYIKILQHRNRDL-KECVQELLELP IQKISQQLDHSINDH----    | 319 |
| TETRAHYMENA     | -----EIID---KVLGLISHNNRDV-KENASDCLESLLMALLATELDSYKHN----     | 322 |
| STYLONCHEIA     | -----ELVA---LTLKLCVNNMET-RDAANEMLVHMQEISDGTIDSSIH----        | 319 |
| APHANOMYCEsA    | -----QFYL---LMLHCASSNKKI-RKPAFACLDSPFAIADGPAAD-IPK----       | 349 |
| APHANOMYCEsE    | -----QFYS---MLLFCTSSNKV-RKPAFACLDGAFDIAQGLVCD-VAQ----        | 343 |
| PYTHIUM         | -----TWFT---YMRCAASESKTI-KENALACANNVLAVIGEFVLQVQES----       | 340 |
| PLASMOPARA      | -----AWFS---YMKSCCLSDNKTV-KHAFACSNILQVNSLYLAEAKDDM----       | 340 |
| BREMI           | -----LWFS---YVQCCSESNKI-KEHAFACSNVAVQVNTYLSVSHDDSD----       | 339 |
| AEDDES          | -----HWQN---LITTKWLRSSVED-RKVAYALHSFHREIARQLLAREDLSESTSD     | 321 |
| MIDGE           | -----SWHK---TLKKTWNAKLYED-KSVGIFATNAPHFQIATTIENRNSIE----     | 337 |
| BOMBUS          | -----YWYD---LLTNVAQDKNKVC-SQCGQYALRRFYRVIIGHILKHS-SEG----    | 321 |
| ANT             | -----YWHH---FLQRLSSETT-MY-GNSGRSALKFYQVIGQILTNQI-SEE----     | 331 |
| WHIPWORM        | -----LLNN---YFSHWSRHYDREL-RSLSLSAQDLLMHEVSAELLRTVEFDR----    | 341 |
| TRICHINELLA     | -----LLNE---CFSHWAKHYDREI-KTYSLNAEDLLIRELATELIPKVDSDP----    | 342 |
| BEEFLE          | -----YWHH---TLKWLKESGTE-D-QKIGILVLEAFYGLGTFLLNDG-SC----      | 324 |
| BARNACLE        | -----TLYS---HLVRWALSNNRDL-ARAGVGALDAFINQVCEWLTAP-TDD----     | 332 |
| THRIP           | -----DWHK---TLCRWLP I GKD-ERRVKGQALLTFYIIMANHTGQR-----       | 312 |
| FLA             | -----WVHN---TLQSWLKLSEW-D-ISIAPVAIEVFHQIARVLLIKK-----        | 317 |
| WHITELY         | -----WVHT---NLRKWLNTNNTKDNQTAVIEITLKSVCVRVIAKEIVDKD-TD----   | 327 |
| TICK            | -----TLYQ---ELGRWSRHGNREL-QSLGTAALSEFLREVASALVEHA-DR----     | 321 |
| TERMITE         | -----FWHE---FLLKWINISAG-ED-HKAGVSAALDVFNQVAVSLKDNPT-SE----   | 324 |
| DAPHNIA         | -----MWFQ---SLKTYVLLDKPGI-REISLNAFGKFEIESIKSLKSEADVA----     | 323 |
| OSTREOCOCCUS    | -----EVFQ---LILLMLRVSKTSDV-ARLAGEAYEKFLVAMSADPDSASP----      | 344 |
| STENTOR         | -----EVIR---TLFDLWLSNKHV-KLVLVQBTERRCLSVLSQSLQE-----         | 318 |
| KLEBSORIDIUM    | -----PAQSSDPHMFQ---YFRYSNHNVMHQI-RDAANHLEETLQVSKMLSEDPAT---- | 339 |
| CLUMBOSS        | -----DILLK---WLQIYCLHGASL-RSAAALPAYDQFVQVSISSCLISDDRRI----   | 338 |
| MOSS            | -----RNMH---WLQEHCHSNKI-RDAALPAYDQFITHVSSALVS-DSRI----       | 332 |
| LIVERWORT       | -----DILS---WLQVYCIHTNAPL-RDAGLILAFNEPISQVSNCLIHESRSL----    | 336 |
| LIGNANO         | -----VLFE---QFFRWSTHNRDL-MHVGMALDAFVKSVAATAASAASAE----       | 318 |
| COPEPOD         | -----FWFL---ELRKWSNSKNRDL-HKIGWKSALFRSREGLSGIDASS----        | 331 |
| GLOBOSUM        | -----TVLFIHSCLSKSMTHGNRDL---QNDTAMTSFLQVQAQALTRDKLSP----     | 299 |
| PALUSTRIS       | -----AIYV---DLRNASQHQNDV-SRLGYRAIDQPLKTIARVLLKSKSAEQ----     | 327 |
| NEOCALLIMASTIX  | -----IPFE---SLLTICKHQNRDL-HKLGQAMDHLLEINYSYSENIIDEI----      | 328 |
| GLOMUS          | -----EIWQ---CLWKLVRHRNPEV-RNAAFKAIWAFKQIARVLSNAT-EF----      | 329 |
| LOBOSPOR        | -----WMYQ---RIAGYCEHSHSGM-SKCGYNSLDVFLQEMANVLTSTEITE----     | 328 |
| SYNCEPHALASTRUM | -----TLYS---RLSSIRFRHNDL-SKLGFRAMVDLIEOTANVLAKLTPGN----      | 325 |
| FUNCTIVORUM     | -----KMFQ---RLFALCKHQRK-LRSKAFAYEVFIQVSEFTSGSRNS----         | 374 |
| HALBUM          | -----KFFA---RLEEWCXINKKN-RDLAENPTIDSPLOQIANELTVGNRSI----     | 364 |
| DPURPUREUM      | -----KPYQ---RIEHWCHNKNL-RDIAFAVDSFPQVSKELTSGNRNF----         | 370 |
| PVIOLACEUM      | -----NPHY---RIEHWCHNVKPN-RDIAFNTVDVFFSQIAKELISGNRSF----      | 363 |
| AMPHIPOD        | -----LVYA---WLLRWSCASNTDD-LKAGRRAMESFLVLAELNPSDV----         | 328 |
| SHRIMP          | -----QVFQ---WVVKWCGSRNRDL-HKAALPAMDTFIVVIANMLEQAMED----      | 329 |
| MUDCRAB         | -----TLFP---WFIQWCSKNRDL-YKAALPALTDTIVLSNILEQSE----          | 327 |
| TARDIGRADE      | -----YTEMYG---DLKRWAVHTNSDA-RKLGFAALSIVYLKQVSRVIMHLEQG----   | 339 |
| HYDRA           | -----QIYD---ALELWINHQNKV-KKIAITATESFLYEVSCYISSVKNQD----      | 325 |
| SALPINGOEA      | -----LILQYL---SDSDSCDHHNKDI-KASAPRALEAFLOQVSAHMTKAGKSK----   | 346 |
| SPIDER          | -----DLYE---VLLQVWVHHNRDM-QKLGKAVAVLKVTEMMMSQYDER----        | 337 |
| LIMULUS         | -----NMYK---NFVHWCHQSNKES-RAIGYAALSFLEKIDTLLAKAREG----       | 333 |
| SCORPION        | -----NLYK---IIEIWHNSNRREV-RSLGYNALDAVFRQISDMLEQNTPE----      | 330 |
| ROTIIFER        | -----EIFD---RISQWSEHKVYDM-KKLAVALDSYKSLAEHIVKSNTE----        | 326 |
| CLIONA          | -----AFPS---AIEGWFHKNWOL-KHAANHWIISPLRQVTRNISDGTNN----       | 327 |
| OCTOPOUS        | -----DMYD---VFLKWFHHKNREL-ANHQWAMEAFYIYISQAVIYEDDAL----      | 323 |
| CAPITELLA       | -----DLYE---TLYSWTNNHNRDM-AHIGMLALEDFLQVSSALVTKVKEG----      | 331 |
| LIMPET          | -----DMYD---RLYFWSHHNRDI-LHVGMAMESFLKQVSNMVSYSL-----         | 326 |
| SCALLOP         | -----GMYD---KLRHWSHHNRDM-LHLGMSAMEAFLOQVSEMLVTRAEEG----      | 331 |
| LINGULA         | -----RLYS---VLLAWSQHNNKDV-SLGMALAEAFLOQVSEMLVTRAEEG----      | 330 |
| OYSTER          | -----GMYQ---KLSWSKHNREL-LHLGTAAMEAFLOQVSEMLVTKAREG----       | 330 |
| SNAIL           | -----NMYT---KLQWASKHQNRDV-LHHGVAAMDAPLQVIAEAITAKAKRG----     | 327 |
| SPONGE          | -----HMYE---SLSSWSNHNKKEC-RVVAVNAIGSFREVSTQISDPSISR----      | 327 |
| PRIAPULA        | -----AVYS---CLRSWSRHHNRDV-QIAGYAALAVLQVIAASVLVGGEET----      | 334 |
| DANTO           | -----SIFD---VMSKWCHTNAEL-KKSSYTALESFLKQVATLVAENIELH----      | 349 |
| ESHARK          | -----TVFE---VMSKWCHTNSEM-KKASYSALDSFLKQVIAHVAENAEHL----      | 338 |
| BHARK           | -----VLFE---TMSKWCHTNSEM-KKASYSALDSFLKQVIAHVAENAEHL----      | 339 |
| XENOPUS         | -----SLFE---VMSKWCHTNSEM-KKASYSALDSFLKQVIAHVAENAEHL----      | 354 |
| STERLET         | -----SLYE---VMSKWCHTNSEM-KKASYSALDSFLKQVIAHVAENAEHL----      | 343 |
| GAR             | -----SIFE---VMSKWCHTNSEM-KKASYSALDSFLKQVIAHVAENAEHL----      | 338 |
| <b>HUMAN</b>    | -----SLFE---VLLKWCATNVEL-KKAALSALDSFLKQVSNMVAENAEHL----      | 334 |
| PLATYPUS        | -----YLFE---VMAKWCHTNSEM-KKASYSALDSFLKQVIAHVAENAEHL----      | 334 |
| TASDEVIL        | -----SLFE---VMSKWCHTNSEM-KKASYSALDSFLKQVIAHVAENAEHL----      | 335 |
| COELACANTH      | -----SLFE---VMSKWCHTNSEM-KKASYSALDSFLKQVIAHVAENAEHL----      | 335 |
| CAECILIAN       | -----SLYE---VMSKWCHTNSEM-KKASYSALDSFLKQVIAHVAENAEHL----      | 340 |
| CANARY          | -----SLYE---VMSKWCHTNSEM-KKASYSALDSFLKQVIAHVAENAEHL----      | 330 |
| OSTRICH         | -----SLFE---VMSKWCHTNSEM-KKASYSALDSFLKQVIAHVAENAEHL----      | 301 |
| GECKO           | -----SLFE---VMSKWCHTNSEM-KKASYSALDSFLKQVIAHVAENAEHL----      | 338 |
| TURTLE          | -----SLFE---VMSKWCHTNSEM-KKASYSALDSFLKQVIAHVAENAEHL----      | 339 |
| ALLIGATOR       | -----MLFE---VMSKWCHTNSEM-KKASYSALDSFLKQVIAHVAENAEHL----      | 299 |
| APLYSIA         | -----NLFD---KLLKWSRHHNRDI-LHAGAALESFVKEICDALVQRAQEG----      | 330 |
| TRICHOPLAX      | -----ALYE---VIVYWRCHNRDI-RAAAPHALEIMKQIAEYLVNEND----         | 328 |
| SOPHCORAL       | -----SVYN---TLFDWCKRKNKEL-RVKGFAALEAFLOQVIAHVAENAEHL----     | 329 |
| STONYCORAL      | -----VMYG---DLYRWCKHNNKEL-SYAAYAAMEAFQOISLVFVGHGD----        | 335 |
| SEA ANEMONE     | -----SLIVYP---AIYRWCHQNRKET-KYAALDAMDSFLKQVSEYIVLDEAEA----   | 335 |
| SEAUCUKE        | -----TIYE---KFLHWSSEHNNKDM-KSAGLSALETFLKQVIAHVAENAEHL----    | 332 |
| LANCELET        | -----DMYR---KLYEWSQHPNRDL-KQAGYAALDSFLKQVIAHVAENAEHL----     | 335 |
| STARFISH        | -----DLHE---AFNKWSAHNNPAV-KAVGFAAQEAFLOQVIAHVAENAEHL----     | 332 |
| SEA URCHIN      | -----MVYN---RLKYWSHSHNSEM-KWAGYDALQAFKVVVSHMLVENADKK----     | 337 |

Supplementary Figure 6 CLUSTAL OMEGA ALL PHYLA, EXPANDED

|                 |                                              |                       |     |
|-----------------|----------------------------------------------|-----------------------|-----|
| PARAMECIUM      | -----KIIFNVLINKPETILND-----                  | NK-A-DM--FLMTVIIIRSV  | 352 |
| TETRAHYMENA     | -----ELSFNVIYIQRMSPLINQ-----                 | ER-Q-QIYTASITVVIKSI   | 357 |
| STYLONCCHIA     | -----DDIFRRIKMEFETILNN-----                  | ET-N-OTN-VLLISTIKAVG  | 353 |
| APHANOMYCEsa    | -----HKQFNRFKEFLTCLTD-----                   | KL-S--DD-KASIALAGLG   | 382 |
| APHANOMYCEse    | -----NKKHFNNKLEFLSCLTE-----                  | KM-S--DD-KVSIALAGLG   | 376 |
| PYTHIUM         | -----RKKTLNRLVLELPLVLD-----                  | KS-A--DTSTMAFALRCLA   | 374 |
| PLASMOPARA      | -----RKKCLANKVLEKVLVVISD-----                | FG-A--STLAIITFALQCLG  | 374 |
| BREMIA          | -----RKKCLANKVLEKVLVVISN-----                | ST-A--GTSTMSFAVQCTG   | 373 |
| AEDDES          | TAEGAAREARITVLANFPMKYFKTVLMA-----            | PG-S--KPYEIRVAIRGFG   | 364 |
| MIDGE           | -----DRQILLFFPMKYFOETLES-----                | PN-S--QPHEIRIAIRGFG   | 371 |
| BOMBUS          | -----D--KAIFLYFKMLFEQLKS-----                | SHHV--NSNMLCYIITVGS   | 356 |
| ANT             | -----NDINDILVYFLQYFEKFRD-----                | SN-L--DLITPRLIANGFG   | 367 |
| WHIPWORM        | -----SNARSYKYFSDIFDASLLK-----                | ER-D--I--RRVSMIAKSV   | 376 |
| TRICHINELLA     | -----NHVRSVYKYFCNQDEIFSN-----                | TS-G--I--REISMISKSV   | 377 |
| BEEBLE          | -----HYKHVTEYFKYFIANMTQ-----                 | SK-V--FNYDKRLCLOGLS   | 359 |
| BARNACLE        | -----GRPAKVPAPLLARLRELDLDD-----              | RA-A--PPAVLSVAHVGYG   | 368 |
| THRIP           | -----GPKDLDFFCNHFKNQFO-----                  | -----MSMDVDIAVKGFG    | 343 |
| FLA             | -----ELKVLLEFFINFFKTQLQT-----                | EK-I--KTYELRIVIRGFG   | 351 |
| WHITELY         | -----QGRQILLEYFSKEITNWSN-----                | TS-C--IFQSADLSLDLLI   | 361 |
| TICK            | -----QDYLDIFQFFIKDFQRT-LK-----               | ME-T--SNHGLAALKGYG    | 356 |
| TERMITE         | -----TGHVFLYFINFFKNMMLS-----                 | SS-T--SSYDMKLVIKAFG   | 359 |
| DAPHNIA         | -----KKSTVLEFFVRSLECVLES-----                | DR-S--SL--QFRTVQ      | 353 |
| OSTREOCOCCUS    | -----REARTKLEKIMESIHIHLLDD-----              | DS-A--SHRRRTACIRALG   | 381 |
| STENTOR         | -----NIDKYTFDYTIKMLMQILNS-----               | -----K--SQEVLQSTIRYLG | 352 |
| KLBSORMIDIUM    | -----EPLVRHYTYELMKAVFGILMD-----              | PA-S--DLITPRLIANGFG   | 376 |
| CLUBMOSS        | -----E-DPRPTYKALMKHMLDTLES-----              | QD-D--NPKVLSLAIRGII   | 374 |
| MOSS            | -----R-NAQALYAPVKDALDVLNA-----               | QD-A--DPKRI SLAIRALG  | 368 |
| LIVERWORT       | -----Q-NVQERYKHPMTTFDILDA-----               | PS-V--DKMLLSLAIRGVG   | 372 |
| LIGNANO         | -----SATPAQKFLFLFLOQFRQILDS-----             | DG-S--SWKTVSVAVRGFG   | 357 |
| COPEPOD         | -----KNIPFVLQFLTDQFQITTRS-----               | KY-S--SHKDISLAIQGYG   | 367 |
| GLOBOSUM        | -----SEIEIFWYFKVEFINNLNK-----                | PET-D--QYAEVLSLAIRGLG | 335 |
| PALUSTRIS       | -----DAKKCFWVMPQFTDILQQ-----                 | HK-A--AYKDVSLAIRGYG   | 362 |
| NEOCALLIMASTIX  | -----EAKKIFWYFIEFPTNSLR-----                 | KED-A--DTKDISLAIRGYG  | 363 |
| GLOMUS          | -----KEFDCVDYFMLIFDDIAGEIKKTSDQQLNKEEQD----- | Q--KTKDISIAVRGVG      | 377 |
| LOBOSPOR        | -----REYNCFLEFFANFTQIISTEVV-----             | TST-A--QYKAMVAIRGYG   | 367 |
| SYNCEPHALASTRUM | -----TEKGVFRFFFLKFFDEMNRRE-----              | SED-P--DYRRIAAAVKGF   | 362 |
| FUNCTIVORUM     | -----SSDEATFFPIKRSYEMLES-----                | SS-S--RLYEVSTAIRGLG   | 410 |
| HALBUM          | -----ESDQATFKYPIRKPYSIPEN-----               | NN-S--TPFDISIAIRGCS   | 400 |
| DPURPUREUM      | -----EADQOTFKFPIRKPYSIPEN-----               | ND-S--SRFELSIAIRGCS   | 406 |
| PVIOLACEUM      | -----ENDQSTFKFPIRKPYSIPEN-----               | NT-S--SRYELSIAIRGCS   | 399 |
| AMPHIPOD        | -----AHTAFSHLVKEFNALLES-----                 | DK-SEGNSYCVSLAVRGYG   | 365 |
| SHRIMP          | -----DKRGVKIFKYLLOEYNKMLET-----              | SE-S--TSKLSLAVKGYG    | 365 |
| MUDCRAB         | -----DKKTVEIFKYLLOEYNKMLET-----              | GK-S--TNQVSLAVKGYG    | 363 |
| TARDIGRADE      | -----NNEGVCSTSAFSPMNEFNEKIKH-----            | A-E--SPREMTVAVRGFG    | 377 |
| HYDRA           | -----TKILKVLFLFRPHKTLNS-----                 | PT-A--SCKEISMAIKGYG   | 359 |
| SALPINGOBECA    | -----DTMPMPGTLFRKPKAAMGE-----                | A-A--SHRAVAIAIRGYG    | 380 |
| SPIDER          | -----KDVCSNIFKYFMNCFRDFILD-----              | KS-T--TSKELQIAVMGFG   | 374 |
| LIMULUS         | -----KSEGSVFKFFITAFQOCMRD-----               | NK-S--DSRDLVAVRGFG    | 370 |
| SCORPION        | -----DSCKAEIFKFFIEKFLMLIK-----               | CS-E--NTRRVSTAIRGFG   | 366 |
| ROTIFFER        | -----TDCKRLIFKYFIQKYSMLTD-----               | GN-K--DLKEMVSIKGYG    | 363 |
| CIONA           | -----NSSHLFNFMKPRAMLDSD-----                 | SR-T--SNKLSVAIEGYS    | 363 |
| OCTOPUS         | -----QKNMFEFFLEKSNVIKKN-----                 | KD-S--TKKEIDVAIKCFG   | 357 |
| CAPITELLA       | -----NRKEGAVFKFFIQKFRDIMDN-----              | NS-S--GSKEIALAIKGYG   | 368 |
| LIMPET          | -----FGDSVFFFIQKFRQIMNS-----                 | SE-S--SDKEVSLAIKGYG   | 360 |
| SCALLOP         | -----H-KEGAVFKFFIQEFRTLMND-----              | TS-T--SAKEVSLAIRGYG   | 367 |
| LINGULA         | -----H-PDRAAFAFFIQFRETLDN-----               | PH-A--KQNEIASAVKGYG   | 366 |
| OYSTER          | -----K-KEAAMPKFPVTRFKEIMEN-----              | SS-A--SAKEMSLAIRGYG   | 366 |
| SNAIL           | -----I-KEGGIFKFPVQVQPTTMQN-----              | SS-A--SSEKVSMAVRGFG   | 363 |
| SPONGE          | -----ELGINSYKFFMKCFRSLMND-----               | PD-I--NHRLLSIAVKGFG   | 363 |
| PRIAPULA        | -----RQRDTIVFVFFVREFRTIEA-----               | G--T--DTRDVAIAVRGFG   | 370 |
| DANTO           | -----KSKLKFPMQKFCALIRT-----                  | MD-S--TNKELSLAIRGFG   | 382 |
| ESHARK          | -----KDKLEYIMQOQFYDIIRT-----                 | PE-S--SNKELSLAIRGFG   | 371 |
| BHARK           | -----KDKLQYFMQOQFYSIIRT-----                 | ME-S--STKELSLAIRGFG   | 372 |
| XENOPUS         | -----KNKLHFPMQOQFYEIIRK-----                 | MD-S--SNKELSLAIRGFG   | 387 |
| STERLET         | -----KSKLEFFPMQOQFYIIRT-----                 | LD-S--STKELSLAIRGFG   | 376 |
| GAR             | -----KSKLKFPMQOQFCSIIRT-----                 | TD-S--TNKELSLAIRGFG   | 371 |
| HUMAN           | -----KNKLQYFMQOQFYGIIRN-----                 | VD-S--NNKELSLAIRGFG   | 367 |
| PLATYPUS        | -----RSKLQYFMQOQFYEIIRK-----                 | ID-S--TNKELSLAIRGFG   | 367 |
| TASDEVIL        | -----TSTLRYFTEQOQFYGIIRN-----                | VD-S--SSKELSLAIRGFG   | 368 |
| COELACANTH      | -----KNKLEYFMQOQFYGIIRT-----                 | LD-S--SNKELSLAIRGFG   | 368 |
| CAECILIAN       | -----KSKLQFPMDQFYRIIRK-----                  | LD-S--SNKELSLAIRGFG   | 373 |
| CANARY          | -----KSKLRFPMQOQFYGTIRR-----                 | MD-S--SSKELSLAIRGFG   | 363 |
| OSTRICH         | -----KSKLQFPMDQOQFYGIIRR-----                | MD-S--SNKELSLAIRGFG   | 334 |
| GECKO           | -----KSKLANFMQOQFYSIIRK-----                 | MD-S--SNKELSLAIRGFG   | 371 |
| TURTLE          | -----KSKLQFPMEKFYDIIRK-----                  | MD-S--SNKELSLAIRGFG   | 372 |
| ALLIGATOR       | -----KSKLKFPMQOQFYSIIRK-----                 | MD-S--SNKELSLAIRGFG   | 332 |
| APLYSIA         | -----QTEGSVFKFLLIQFRTIMNA-----               | KN-S--TDKHSVSLAIKGYG  | 366 |
| TRICHOPLAX      | -----AANINIFKFLPKFRSIIIDS-----               | GS-S--DAKELALAIRGYG   | 364 |
| SOFTCORAL       | -----TVECGDIFKYFIKEFRRIINS-----              | NE-S--LITREISIAIRGYG  | 366 |
| STONYCORAL      | -----KSDLAMFMYFIKTFRRIIIDS-----              | VL-S--DTRQMLAIVRGYG   | 371 |
| SEA_ANEMONE     | -----VNPKEDFIQRFRAIIDS-----                  | DS-S--TTQQMSIAIRGYG   | 368 |
| SEACUCLE        | -----SNTDAAVQFFIQFRSSIDN-----                | TD-S--GLKSWATAIRGYG   | 369 |
| LANCELET        | -----N-NKADLAVKFFIREFRTIIDT-----             | TE-A--GTREMSIAVRGFG   | 373 |
| STARFISH        | -----DASDMAVFRFFVKRFRDIIDN-----              | PQ-S--DTRALSSAVRGFG   | 369 |
| SEA_URCHIN      | -----RSSDVAVLKYFIKFRSTIDD-----               | AS-S--SSKLSLTAIRGFG   | 374 |

Supplementary Figure 6 CLUSTAL OMEGA ALL PHYLA, EXPANDED

|                 |                                                           |     |
|-----------------|-----------------------------------------------------------|-----|
| PARAMECIUM      | HFAKAIANLRGE-KQLGDFDKLNDLGFERVLQVY-E-----DPYKEEENMKRGAQ   | 402 |
| TETRAHYMENA     | IFSKAIKHLQGE-DQLQLFKQMINLSEVRLKHI-EKDGVNSVVDQPVDEDTMKKGTG | 415 |
| STYLONCCHIA     | IFSKAIKTKSGD-DALREYLKSLTTLSONKIKEP-EQQ-----EDPKNDYKN      | 399 |
| APHANOMYCESa    | NFAAIVPMFMA-DALPKIHARLIKYGEDLVAIRE-G-I-----EDPKNDYKN      | 418 |
| APHANOMYCESa    | SFAAIVPMFMD-GALSKIHTRLVKYGEDVMAMRE-K-M-----EDPKNDYKN      | 412 |
| PYTHIUM         | RIAPAIRMYLGE-KAFLKVEDRLKRFGENLLVDD-KAT-----               | 411 |
| PLASMOPARA      | WFASSIFTYLGA-KGYIKIEDKLRVYGESLLALDA-KTT-----              | 411 |
| BREMIA          | WLASSIYLYLGA-KGYTRTENKLYGESLLALDT-KAV-----                | 410 |
| AEDES           | SMAEACSLMTE-EYMNELLLVMQRTFVYLVEE-K-----                   | 399 |
| MIDGE           | IMAGACQVLES-KYLSERFDLVQRTQYSYTND-R-----                   | 406 |
| BOMBUS          | QLAAPCKIYLTN-NDVKNMPSLAINCAMPKCSRDD-I-----                | 391 |
| ANT             | QMAAPCKVMSD-FKRSYMSITTSYALPLCSSEY-S-----                  | 402 |
| WHIPWORM        | RLFAVSHVLFEN-GEVNRLLRQLLPRPHQFLCHDE-G-----                | 411 |
| TRICHINELLA     | RLFQIGKALYGE-EFVCKVLRKLLQRFYLSSTSS-D-----                 | 412 |
| BEEBLE          | SFSGVYQLQLE-EEKKLFQAIIQNPFQTYLNL-D-----                   | 394 |
| BARNACLE        | ALAAPCGRLHPP-QELALLVWTLADRAERLYLAGE-SAP-----              | 405 |
| THRIP           | LFAKPMKLL-SP-EETPVFNIIAQKSHSEESFKS-----                   | 375 |
| FLEA            | TFSSCCSALLSQ-DDIIPLYKIIQQTTEVMTSET-Q-----                 | 386 |
| WHITEFLY        | IFVEPYKYSY-G-DDLSNLFSDIVKRAECLCAEKN-ESD-----              | 397 |
| TICK            | LFALPCKRYLKE-ADVLYMLNDVLRSEHVFSQIS-S-H-----               | 392 |
| TERMITE         | LFAAPCRVYMT-ODVLYMFTVMQRAEQIYFKEG-D-----                  | 394 |
| DAPHNIA         | LKALGECSLSVTGDNIWHIFMYLFNKTAVICIQED--T-----               | 389 |
| OSTREOCOCCLUS   | KFAPALELGVGADMRALGRLEKLSMYTTFRQGHNEF-----                 | 421 |
| STENTOR         | VFAADPIQFMQGE-NELKGLLEKLVMTGMASSDD-EHT-----               | 390 |
| KLEBSORMIDIUM   | KLAGALKFSQGE-EKLRKALNRLLPFGARFVSTG-Y-G-----               | 412 |
| CLUBMOSS        | KLAPVVKYSYSG-SLEKAFQRLVPPVFSFR--G-GDS-----                | 409 |
| MOSS            | KLAACIVKFSYSG-ECLKADPHRLEPPFGLSRL--G-DGR-----             | 403 |
| LIVERWORT       | KLSPILVKYSYSG-ETLEKVFHRLSSLGGTTTRGG-EVY-----              | 409 |
| LIGNANO         | YFAEAAKLLAP-PDMRQVADVVQRAEDLFTAES-DSS-----                | 394 |
| COPEPOD         | EFAEPLARFLSE-EKYLNLCEVLGQTEQHFHSESSQEQ-----               | 405 |
| GLOBOSUM        | LFATPCKVLLAE-KELKELQGLVLRK--LSSLSSGSN-----                | 369 |
| PALUSTRIS       | FFAGPCKQLLDP-QQLNMLHELVAKNAFLNSVGTGNR-----                | 399 |
| NEOCALLIMASTIX  | LFSGPKKYFNE-SEFNIIINELLKADSIKSNLNLE-----                  | 400 |
| GLOMUS          | YFACSKRLDKE-ERYKPIFQNLNPNWAIKSNLNLEI-----                 | 415 |
| LOBOSPOR        | YFAEPCRHAPD--QLKMLVQLLRKSSFLVSSNLNEGV-----                | 404 |
| SYNCEPHALASTRUM | HFSKVPKFMQO-SEVQGLVQELVKKSAWIFTEGTLHEH-----               | 400 |
| FUNGIIVORUM     | YMAADPIQFMQGE-NELKGLLEKLVMTGMASSDD-EHT-----               | 447 |
| HALBUM          | RFAAPVKAPIGE-WELKSLLSLFXFKSEKLMVVKI-ENI-----              | 437 |
| DPURPUREUM      | RFAAPVKSPMGE-WELKSLLSLFXFKSEKLMVVKI-ENI-----              | 443 |
| PVIOLACEUM      | RFAAPVKSPMGE-WELKSLLSLFXFKSEKLMVVKI-DNI-----              | 436 |
| AMPHIPOD        | LFAGACKQLLPS-QQLRQLFSTVLTASQHFVQAS-ELF-----               | 402 |
| SHRIMP          | LLSGACRQLPSP-VEVHTMFSQVLTASQHFVQAS-DML-----               | 402 |
| MUDCRAB         | LLSGACRQLLPS-VEVHTMFSQVLTASQHFVQAS-EML-----               | 400 |
| TARDIGRADE      | AFVAPSRILLSTA-AQNEQMLSEMLQKSEQTFSSATEV-----               | 414 |
| HYDRA           | KFSLAFSNVMT-NEKISVFEIILKRESEMILLAN-----                   | 392 |
| SALPINGOEA      | YLAAPCKLFCGV-DDLRMLSDLLARRCQQLYFHMGDDEQ-----              | 418 |
| SPIDER          | LFAGPCKLCLSE-VQVKMLQNVIQKSEHEFFSGG-KDI-----               | 411 |
| LIMULUS         | LFAGPCKLYLGE-EDVDFMYTELQRCQMYLTES-ILL-----                | 407 |
| SCORPION        | YFAKVKLYLGE-EDVDFMYTELQRCQMYLTES-ILL-----                 | 403 |
| ROTIFFER        | AFAGPCKRELMPT-KMKLMLANIIDIIDRNFLSAD-SA-----               | 400 |
| CIONA           | LFAGPCKRFLPK-SEVRYMFTQMNQCENIPLPEKVDFF-----               | 401 |
| OCTOPUS         | LLAGPCKKPHQ-DDVDFMYTELQRCQMYLTES-ENL-----                 | 394 |
| CAPITELLA       | YFAAPCKLYLTP-KDVLDFMFMNEMLRHSEQFLSGA-EQN-----             | 405 |
| LIMPET          | LLAGPCKRRFLNV-TDVFDFMFMNEMLRHSEQFLSGA-GEN-----            | 397 |
| SCALLOP         | LLAAPCKFLKQ-ADVDFMFMNEMLRHSEQFLSGA-ENL-----               | 404 |
| LINGULA         | AFAAPCKFHMTA-EDVDFMFMNEMLRHSEQFLSGA-ELK-----              | 403 |
| OYSTER          | LLAAPCKREFLQO-KDVDFMFMNEMLRHSEQFLSGA-KEDI-----            | 404 |
| SNAIL           | LFAAPCKIFLEP-ADVDFMFMNEMLRHSEQFLSGA-EPV-----              | 400 |
| SPONGE          | HFAKPCRLYGS-EDLHFMFMNEMLRHSEQFLSGA-DFT-----               | 402 |
| PRIAPULA        | SFAATPCKFLSE-ADVDFMFMNEMLRHSEQFLSGA-EMI-----              | 407 |
| DANTO           | LFAPCKVY-CP-QDVFDFMYTELQRCQMYLTES-DRD-----                | 418 |
| ESHARK          | LFAAPCKAV-NS-KDVFDFMYTELQRCQMYLTES-DTE-----               | 407 |
| BHARK           | LFAAPCKAV-DS-HVDVDFMYTELQRCQMYLTES-DTE-----               | 408 |
| XENOPUS         | LFAAPCKAV-NA-KNVDFMYTELQRCQMYLTES-DTE-----                | 423 |
| STERLET         | LFAAPCKAV-CL-GDVFDFMYTELQRCQMYLTES-DTE-----               | 412 |
| GAR             | LFAAPCKAV-CP-QDVFDFMYTELQRCQMYLTES-DTE-----               | 407 |
| HUMAN           | LFAGPCKVI-NA-KDVFDFMYTELQRCQMYLTES-DTG-----               | 403 |
| PLATYPUS        | LFAPCKVI-NP-NDVDFMYTELQRCQMYLTES-ETI-----                 | 403 |
| TASDEVIL        | MFAGPCKSI-NA-KDVFDFMYTELQRCQMYLTES-DTI-----               | 404 |
| COELACANTH      | LFAAPCKAV-CP-EDVDFMYTELQRCQMYLTES-DTE-----                | 404 |
| CAECILIAN       | LFAAPCKVI-NA-KDVFDFMYTELQRCQMYLTES-ETE-----               | 409 |
| CANARY          | LFAPCKAI-HP-EDVDFMYVELLQRCQMYLTES-ETI-----                | 399 |
| OSTRICH         | LFAPCKAI-RS-KDVFDFMYVELLQRCQMYLTES-ETV-----               | 370 |
| GECKO           | LFAPCKAI-NS-KDVFDFMYVELLQRCQMYLTES-ETM-----               | 407 |
| TURTLE          | LFAPCKAI-NS-KDVFDFMYVELLQRCQMYLTES-ETA-----               | 408 |
| ALLIGATOR       | LFAPCKAI-NS-KDVFDFMYVELLQRCQMYLTES-ETA-----               | 368 |
| APLYSIA         | QLAAPCKMFLSE-ADVDFMFMNEMLRHSEQFLSGA-EEL-----              | 403 |
| TRICHOPLAX      | YFAAPCKTLLK-DDVDFMFMNEMLRHSEQFLSGA-IDV-----               | 399 |
| SOFTCORAL       | YFAKPKVFLKD-EDIKYMTSIIQMSQMYFNDS-ELK-----                 | 403 |
| STONYCORAL      | YFSKPKLFMQA-DDVDFMFMNEMLRHSEQFLSGA-DLS-----               | 408 |
| SEA ANEMONE     | FFAKPKLFLMFTA-EDVDFMFMNEMLRHSEQFLSGA-EMQ-----             | 405 |
| SEACUKE         | FFAPCKMFLGE-NDVDFMFMNEMLRHSEQFLSGA-NID-----               | 406 |
| LANCELET        | FFAPCKMFLSE-SDVDFMFMNEMLRHSEQFLSGA-DSM-----               | 410 |
| STARFISH        | YFAAPCKLMTD-DDVDFMFMNEMLRHSEQFLSGA-EVS-----               | 406 |
| SEA_URCHIN      | YFAAPCKAFMKE-ADVDFMFMNEMLRHSEQFLSGA-E-----                | 409 |

Supplementary Figure 6 CLUSTAL OMEGA ALL PHYLA, EXPANDED

|                 |                                                            |     |
|-----------------|------------------------------------------------------------|-----|
| PARAMECIUM      | PKVL-LYRQKQLNSPLISYANTLKQLSK-----ISD-KQIQHPLALCSLCTKQHY    | 450 |
| TETRAHYMENA     | FKPT-LYRQKQVISPITSPANILISQLDK-----LYED-ESQSLRLCMVGFQKFS    | 463 |
| STYLONCYTHIA    | FKQI-LKKQKQLLSPIESYSPILIONLDS-----EPSDEVHTFLKVCRIQVRRHR    | 448 |
| APHANOMYCESA    | ----KLMWMLLCRYTTCYGRFVQKMQC-----QS-DI-VVQNSFVSLVCRLLDAYP   | 463 |
| APHANOMYCESE    | ----KFKWMLLCRYTTCYGHFVVMQMS-----NE--A-AVENFAVTLACRILEAYP   | 456 |
| PYTHIUM         | ----AMRWSVFSVSYVCGCFVQKERS-----TSIDD-TNITFLGDLICHLLDAYP    | 457 |
| PLASMOPARA      | ----AWKWSLICQYVQCGQFVQHRSD-----VVLDE-GYIMFLERLILCHLMTAYP   | 457 |
| BREMIA          | ----AWRWPFLSQYLQCGQFVQHRSD-----VVLGE-SFVKPFQDMMCHLMTAYP    | 456 |
| AEDDES          | ----SNELLEHLPDFVQALSDIMSHVRE-----LTG-VQIIALQNIIGLVKDFH     | 444 |
| MIDGE           | ----LKRROVLEHLPHYVESLSKIMTHLNE-----ISG-LQLQSLLETMVILIKDFH  | 453 |
| BOMBUS          | ----EKITHLESICNTQEALESSEILHTSD-----LST-DOINIITKSLILIKRFP   | 436 |
| ANT             | ----HSPTHESSICCTQEALESSEILCHMTD-----VTM-EQVITLTKLSAYTIFRFP | 447 |
| WHIPWORM        | ----PVEQVITHYVTSPLAENARALPLLNS-----VFP-DIMQIVDEDLHVKMFINIP | 457 |
| TRICHIANELLA    | ----AQQQNVYHITNILEASRLLCLSK-----IAD-DVQVLERPHVTLFHNFP      | 458 |
| BEEFLE          | ----PSTDVLEPLFPYLQTVANFL-QFKT-----VTN-NELFLCQGLTILLMKLFP   | 439 |
| BARNACLE        | ----PP-AELLQLLQPGHVSLLGCALALPT-----LPA-AQLATGERLILLVLEHYP  | 451 |
| THRIP           | ----NHHRLADYVLSLMSFVSEAGV-----VHS-LQLSILESLSVQLICQYA       | 417 |
| FLEA            | ----HKSIQNLPEYLESLSIILSHMPS-----INN-VHLKALQNLIVILFQEPH     | 430 |
| WHITEFLY        | ----TAAEFVMARIGEPFLCANLAVCNCKD-----ITH-QQLVSELETIMVMKMPY   | 444 |
| TICK            | ----AVLEDSLPLSSPQEAASILRCTGQ-----VPA-SQLALLEKLTVLQIENFP    | 439 |
| TERMITE         | ----ISNADLQNLDPYIESLSIMRQLSA-----VTN-EQLVALQCLTVQLIENFP    | 440 |
| DAPHNIA         | ----SKSLDILLVCLLESGLVITHCTT-----PLGT-ERTQQLQRMFVHLFRKYL    | 434 |
| OSTREOCOCCUS    | ----GRFESIERQVLSLLSASQLLRKREI-----MVDE-ALIVTVGDLVVEWLEHFI  | 468 |
| STENTOR         | FK-SMFLQKLSLLELASSLDRANMMS-----LPE-SALLHFSDDAFELFRKI       | 438 |
| KLEBSORMIDIUM   | ----DNLGHVTVLGAFAFMVYLYPS-----VED-SLISLITVAGATIFRYP        | 456 |
| CLUBMOSS        | ----HEELGYAVTVVGAFAINVYIDR-----VED-FMVSILTETVGRIFPOYP      | 453 |
| MOSS            | ----EGSLGYAVTVVGAFAIMVILHLD-----VED-LMVTPIAQVTVSIFFLYP     | 447 |
| LIVERWORT       | ----ENYIGHSVILIGAFADIVNHFDR-----VED-FMVSPIAEVIGNIFYQFP     | 453 |
| LIGNANO         | ----DERLSNLPSPFVESLSNLALHLDE-----LTG-VFLSLLARL SVTVCHMYP   | 438 |
| COPEPOD         | ----EKWKLQFPSPHMSLAVMISLTT-----TSI-NLSFSLVLSFNLVKXFP       | 449 |
| GLOBOSUM        | ----DAKYAHISAFMDAFKMTVHESVK-----VDT-ELLNAIEEELTSMMLNFP     | 413 |
| PALUSTRIS       | ----EDILSHIPSPLEAYTFLADELDV-----IDT-ELLAAVEAIAKTMUTKFS     | 443 |
| NEOCALLIMASTIX  | ----EMPLHFSPLQAYNSILKVSIDI-----VDN-SLLRGLIELITQLMISFP      | 443 |
| GLOMUS          | ----THALSQIPLYIEAYCFIREYDE-----IFQ-QLMTEIHEVGLMMIYFP       | 459 |
| LOBOSPOR        | ----DGSSTHLAAFISAYTNVAVYTE-----VPE-LLMSALQMVNAAIANFI       | 448 |
| SYNCEPHALASTRUM | ----RLLNYIPSPIASYQILQHVND-----VSS-QFVATLTRAIDVFTDYR        | 443 |
| FUNCTIVORUM     | ----EQSASHLASTISAFASILQ-----E-TYLTHFREALCTVFRIP            | 486 |
| HALBUM          | ----DETVMHLSSPINAENLILPEIKD-----IFY-WYMEHLQAVQATYFIIFP     | 481 |
| DUPURPURIUM     | ----DEITLHLSSPINAFASTLYELSE-----LEP-WYLDHIEQLLETYFIIFP     | 487 |
| PVIOLACIUM      | ----DEITLHLSSPINAFASTLYELNE-----LEP-WYLDQIEQVLETYFIIFP     | 480 |
| AMPHIPOD        | ----DTKLANLPNFIQSLASILKHLDP-----ADS-ASVSAVLELSVALTRHYP     | 446 |
| SHRIMP          | ----ENKLTNLPSPYIESLAIILSNMDV-----VNS-GILENVQOSSLAVEHFP     | 446 |
| MUDCRAB         | ----ENKLSNLPSPYIEALDIICNMST-----INV-GIVENMLQALALVENFP      | 444 |
| TARDIGRADE      | ----IGESRLEHLPTFLDTSAMVQDCGS-----AVPD-AFLAAVQRCLSLVIQMPF   | 461 |
| HYDRA           | ----ELPHQLPTYLESLSCLIKIFTS-----VNY-SLLHPIEKIIIFIFENIC      | 435 |
| SALPINGOBECA    | ----ESSAIHASYIDATARLIQOLEE-----SGD-VFLPILERLIVLLEAYP       | 462 |
| SPIDER          | ----DDKIVGLANYIEALSSIVSVTEC-----MTD-NILISLEKLVVQIDKFP      | 455 |
| LIMULUS         | ----EEKIQLPSPYLEALASISQLNE-----VSE-THLERVVKLVVQIEHYP       | 451 |
| SCORPION        | ----DERIQLPSPFLDSSILQLQEB-----ISE-SSLNVEKLVAVPQIQMPF       | 447 |
| ROTIFFER        | HNETYDEKIFQSSIFLESVCVQSDS-----FSE-OSLMTWKEKLVLLADCPY       | 449 |
| CLIONA          | ----DNRTHQLPTPVQSLASITKQIESKNENDKNPIGLPE-SYRTSLQRSLVLLERYP | 455 |
| OCTOPOUS        | ----HDQLYSLRGYLEASSILKEIDC-----ISD-ESLKIIEYLLVAMLENFP      | 438 |
| CAPITELLA       | ----DRRIIGLHSLFGALASIVLELDQ-----FSE-TFLVSLERLIVLQMVLP      | 449 |
| LIMPET          | ----QDKMYGLHSYLDALANILKEIDE-----LSE-TYASIVEHLLVMQIQMNP     | 441 |
| SCALLOP         | ----EERLFLNLPSPYLEALGNILKQLEDE-----ISE-TYALSLEKLVLLIEKLP   | 448 |
| LINGULA         | ----VDNVYQLPSPFLQIASVILHLD-----VSD-TFLVSLERLIVVQIDNFP      | 447 |
| OYSTER          | ----EDKLYSLPSPYLEALGNILKQLEDE-----VPE-TYATSIERLMLILLENFP   | 448 |
| SNAIL           | ----HEKLSLSDYVHLALANILKVVTK-----VSE-VYALTLERLIVLLENFP      | 444 |
| SPONGE          | SSSVAFERFLPTFIEALANISKEIQN-----LPD-VCLSSQLKLVLLFHCYP       | 451 |
| PRIAPULA        | ----DSRMVELPPLLEALASIVLELDQ-----VSE-SFLASLEQLVLLVGNVP      | 451 |
| DANTO           | ----DDNVYQLPSPFLDASVILHLD-----IPE-VYTPVLERLIVVQIDSFP       | 462 |
| ESHARK          | ----DDNVYQLPSPFLDASVILHLD-----IPE-VYTPVLERLIVVQIDSFP       | 451 |
| BSHARK          | ----DDNVYQLPSPFLDASVILHLD-----IPE-VYTPVLERLIVVQIDSFP       | 452 |
| XENOPUS         | ----DDNVYQLPSPFLDASVILHLD-----IPE-VYTPVLERLIVVQIDSFP       | 467 |
| STERLET         | ----DDNVYQLPSPFLDASVILHLD-----IPE-VYTPVLERLIVVQIDSFP       | 456 |
| GAR             | ----DDNVYQLPSPFLDASVILHLD-----IPE-VYTPVLERLIVVQIDSFP       | 451 |
| HUMAN           | ----DDRVYQMPSPFLQSVASVLLYLD-----VPE-VYTPVLEHLVVMQIDSFP     | 447 |
| PLATYPUS        | ----DDHLFQLPSPFLQSVASVLLHLD-----VPE-VYTPVLERLIVVQIDSFP     | 447 |
| TASDEVIL        | ----DDHMVQLPSPFLQSVASVLLHLD-----VPE-VYTPVLERLIVVQIDSFP     | 448 |
| COELACANTH      | ----DDNVYQLPSPFLQSVASVILHLD-----IPE-VYTPVLERLIVVQIDSFA     | 448 |
| CAECILIAN       | ----DDMVYQLPSPFLQSVASVILHLD-----IPE-VYTPVLERLIVVQIDSFS     | 453 |
| CANARY          | ----DDHLYQLPSPFLQSVASVILHLD-----VPE-VYTPVLEHLVVMQINSFP     | 443 |
| OSTRICH         | ----DDHLYQLPSPFLQSVASVILHLD-----IPE-VYTPVLERLIVVQIDTFF     | 414 |
| GECKO           | ----DDHLYQLPSPFLQSVASVILHLD-----IPE-VYTPVLERLIVVQIDSFP     | 451 |
| TURTLE          | ----DDHLYQLPSPFLQSVASVILHLD-----IPE-VYTPVLERLIVVQIDSFP     | 452 |
| ALLIGATOR       | ----DDNVYQLPSPFLQSVASVILHLD-----IPE-VYTPVLEHLVVMQIDSFP     | 412 |
| APLYSIA         | ----DEKLSISPSYLTALSHIRQVDS-----VSA-PYAVVLERLIVLLENFP       | 447 |
| TRICHOPLAX      | ----VDKIYQLPSPFLQSVASVILHLD-----VND-TFTRSLKLTIVLLENFP      | 443 |
| SOFTCORAL       | ----EKKLQNLSPFLQSVASVILHLD-----IPP-AFLSFLERLIVVLEKFP       | 447 |
| STONYCORAL      | ----EDRAQHLPTFLEALSSITIEELDK-----ISD-SVLACMERIVRVLFDKFA    | 452 |
| SEA ANEMONE     | ----EDRVQQLPSPFLQSVASVILHLD-----ISD-GFLVSLERLIVLLENFP      | 449 |
| SEACUCIE        | ----EDRFMQLPSPFLQSVASVILHLD-----VPE-SFLNSLEGLTIVAFRSYP     | 450 |
| LANCELET        | ----EDKVHLLPSPFLQSVASVILHLD-----LSD-MFVTSLEKLVVLEKFP       | 454 |
| STARFISH        | ----DDKLNQNLSPFLQSVASVILHLD-----LSD-SFQAALERLIVVQVSSYP     | 450 |
| SEA URCHIN      | ----ERLSQLPTYLEALASIVQLD-----VSD-TFLTSLERLIVVLEKFP         | 452 |

Supplementary Figure 6 CLUSTAL OMEGA ALL PHYLA, EXPANDED

|                 |                                                                 |     |
|-----------------|-----------------------------------------------------------------|-----|
| PARAMECIUM      | NYFE--NYRPLYDGHANI I I S I F---GHQT-IGIQPVGSLLSKVIEEL--KLQGNQL- | 501 |
| TETRAHYMENA     | SFYE--KYKEPLNGBIVQLMREMK---KHQS-IYIIMLENLQNLVQVSI--KLPDMSPL     | 515 |
| STYLONCRIA      | KLQY--KYRDRFYEAASPTKALS---KHOK-AFANWIKQFVDLSLILQL--KIPDAVLF     | 500 |
| APHANOMYCEsa    | SSAI--VVKYQAEALVMSADAFS---ST----DVMKRILQHMVLV--SNRIDTDP         | 510 |
| APHANOMYCEsa    | SSAI--VVKYQAEISLVSIQALP---TG----NAIDRVIRHGIILLV--STQLNPSQ       | 503 |
| PYTHIUM         | RCLW--KSKLTIYKLSILCAVH---SS-GDVQLLDRIVHRAFLLSI--SNVTETEE        | 508 |
| PLASMOPARA      | QCLL--KSKSVVHKSLAALFVLSL---KW-TVIDPVVDQFVHHLLFSI--ADITDPDQ      | 508 |
| BREMIA          | QCHW--KSKVVKHPIAALVLSL---KW-TVIDPLINRFLVHLLMSI--SSVTESEDE       | 507 |
| AEDDES          | YLSS--SYHELIVSSLMKTFDNLG---KGGVLDNLLKIVLRITITWC--SHMLVVDV       | 497 |
| MIDGE           | FLST--AHHPLVASSLLETLLMLQ---KLGKMLHDVMSIVVQIITWC--SHQSVYDL       | 506 |
| BOMBUS          | EFVY--SNQNFVSLVNTIINIM---TINRDLLEFLVNLINVMVMS--LHPLFVDA         | 489 |
| ANT             | DLTK--SBNALAVLILKTIISNLA---TVMKSLLRVLDIVYVAVMC--SHTLALDA        | 500 |
| WHIPWORM        | ALGA--KWTARCKQVYIYAFPAAL---TKN---RSYITSVVDQKLLHL--TLPPTLDG      | 506 |
| TRICHINELLA     | LMEX--RFYHRCKVINVATFAAAY---GHN---YQYIQSIVPQSLIRNI--ASLPSVGK     | 507 |
| BEEFLE          | QLPY--YCHPLVTEALVLTFFYLL---LNSEHIFNTPLENVIFQVVMVC--SHQHITEA     | 492 |
| BARNACLE        | RVPY--THRFADGGVARCLLALL---GRPE-LAAPCLRRLLVQMLRQC--SHALAVET      | 503 |
| THRIP           | KEEH--PDWRVVMVAVICTLQRL---RKCGVALDSFMNVHQBILRSV--THPVIEDA       | 470 |
| FLUA            | QLSG--SHHNLCIESLMKTFFNIT---QINGCFYEEVLEVTVIYHVGIC--SHPIAIES     | 483 |
| WHITEFLY        | DCGR--N--WKASQTIERTVLCLL---LKSEKTLDTYLGIVFQGITRC--DTLLLDQV      | 495 |
| TICK            | LVAQ--NLQMRKCKSLFLVLLAV---YPIRSRSLSQIVYQGLVRC--SHPIAAQV         | 488 |
| TERMITE         | KLPK--PFHWLAIRAITVTLSSLA---ESGGTFLEELFNSVYQGITRC--KHQIADV       | 493 |
| DAPHNIA         | DIDE---GNRCGRSAVFLVGVHAAIENQI--DFSTFVRDVIQILIRIT--RPE-----      | 482 |
| OSTREOCOCCUS    | FEQS--RRKPLIQNALWNLFVALS---SKGC-ALQTLTRIGAKLLGLLRVSPDPVK        | 522 |
| STENATOR        | KIHE--RYRQRMNSIAQLFASLH---LHHE-KFTDFWRFPIAKSHQGL--EIPDFID       | 490 |
| KLEBSORMIDIUM   | LLWE--KQKPAVHTAFVMLCSLY---PKGE-AFTSFLANIVSIVVDM--SHDDPAP        | 508 |
| CLUBMOSS        | SLFP--KORVAIHSTLSSLLKALY---PKGN-LFVMPLMNVVMSKLRPT--DTD----      | 500 |
| MOSS            | QLPA--KQKQAVYALRNLLKALY---PKGP-VYFLPLRNIVVMSLQRDM--EPVDEALE     | 499 |
| LIVERWORT       | ELYP--KQKQGVYNTMSAFFKAMY---PKGP-IFSIFLNVVMSLERNM--ETSEGVSG      | 505 |
| LIGNANO         | RVSE--RMGRVGLRAVAHALHRLR---SRRPGLAKAFAPVYQSLVRC--SHEHPVYQ       | 491 |
| COPEPOD         | VLPH--QYHGFAIQALLQVFOCTA-----VSDTMLDNVYQVITESC--SHPVAGET        | 497 |
| GLOBOSUM        | KVRE--YYRKLVSAPVELMWELN---IHGL-L-WSPWGGIAKRLIIRC--VDKEEDRT      | 464 |
| PALUSTRIS       | SMGA--AYRGLSVSAPRNLLVGLN---KKG-IGTALWSKIAIYVIVIRC--TSTSSDDI     | 495 |
| NEOCALLIMASTIX  | LLND--KLKFINAKSIQHILWELN---NK--SIMDTFFNKIASDILVLC--LNKEQKET     | 494 |
| GLOMUS          | RMVY--DLRLRCVNAFHEHLLWMLY---LKGRGTMEKFKVSKFYQILLIRC--SDAIIQLQ   | 512 |
| LOBOSPOR        | RMST--YARIDCTISIVRLLVMLF---YKGEALRGFFDKFSYKLLVFS--ADIARQP       | 501 |
| SYNCEPHALASTRUM | RLSS--WARESGTVAIQDALHSFY---SKSEGDLRAFATTFYVNLITWC--TETRDPAP     | 496 |
| FUNCTIVORUM     | DLIF---RDCYCLASRLIITALC---SKGT-SLQSLDRVYQGLIIRC--SVPRIIDG       | 536 |
| HALBUM          | YLPT--VQREYRYSAWNRLLSSLY---HRPE-PLKTLGRVIRVQGLLIF--SKPHEALL     | 533 |
| DUPURPUREUM     | HLPV--KSRDRYPKAVNRLISSLF---YHGE-YLKILSLRIVKXKLLIF--SKNPSIK      | 539 |
| PVIOLACEUM      | HLPV--KSHRFHMAVNRLLISSMY---FRGE-YLKILSLRIVKXKLLIF--SKNPSIK      | 532 |
| AMPHIPOD        | QLAA--PERGVAAHALLLTLLATST---AAPG-L-SCIRSSVHQQIILLC--SHSVPGDD    | 497 |
| SHRIMP          | LVSS--FKRFLAYRALFLFFTVY---NKP-YPHEFLHTFVYKAVILVC--SHAPEVES      | 498 |
| MUDCRAB         | SVSV--YKTFLAYRALFKLVYAIH---GKAE-YFQDFIHSFVYKVIHVC--SHAPEIDS     | 496 |
| TARDIGRADE      | QLGP--HIQHTACQAVVKTVMVVA---RACP-TANDFVGEIVYKGLRGC--LLEMPSDV     | 513 |
| HYDRA           | NLKG--TGLALYMKGIATFIDSVS---STQS-MIKTSLSRIVYQILLIRC--SHSTLSEE    | 487 |
| SALPINGOBECA    | SMYR--TQRASVHLSLTRCFVSLY---HRGS-TLQTFPAKVAHVHLSRC--SQSIRDTE     | 514 |
| SPIDER          | KVPT--AYNFIVSKAIRMFLAVL---PKRD-MFIFGLSQIVYQIVKVC--SHPVVVEA      | 507 |
| LIMULUS         | QLAD--VHHFLSYRSIRITLLAFA---PKKA-VFKRFLGNIVYQGLIRC--SHPVVAEV     | 503 |
| SCORPION        | YLPY--PYHFLCINSLIKLFLAVH---SKGP-QFKGFLANKIITQGLIRC--SYVPRFBI    | 499 |
| ROTIFFER        | KLVK--RYNMOISLAAALFLAQ---R-TN-FSDFEISRTIYHLLIFP--SYKTLVSV       | 500 |
| CIONA           | KLHR--KYSFLCHNALISVAAAPL---EKOE-ILKTLLESIVYQGLIRC--AYNVVGT      | 507 |
| OCTOPOUS        | QVYF--KYHFCKVKALKVLLALL---PKET-HLREILRETVYQGLIRC--HLATPLKE      | 490 |
| CAPITTELLA      | RLHV--KLHNQCYIALIRLFLGLA---LKGS-IFKGFLEIITVYQGLIRC--SHPVIVLES   | 501 |
| LIMPET          | MLNE--KMHFMATKSVIHLVLLALM---CKGS-VFNQVLSGVVYQGLIRC--SHPVIVLET   | 493 |
| SCALLOP         | SLPQ--TLSFICLKSILWLLAVM---PKGT-TFQQIMSGVYQGLIRC--SHPVIVLET      | 500 |
| LINGULA         | SLYK--KRKLDVQSLIGIFHALI---SKGP-TLRIPLGRVYQGLIRC--SHPVIVLET      | 499 |
| OYSTER          | TIHQ--KQHFPSVKSLLWVLLITL---PRGE-VFSQVLSGVYQGLIRC--SHPVIVLET     | 500 |
| SNAIL           | TIYR--GFHFCLKGLHLLVLLVQ---SKGS-TFNKLSGVYQGLIRC--SHPVIVLET       | 496 |
| SPONGE          | FLSS--HVRYQGSVSLKLLIMAVS---SIPT-SFKQFLSHIVYQGLIRC--SLPVVIEA     | 503 |
| PRIAPIULA       | LLRRESRLDHRACGAVRVLLALR---SKRA-TQRSVLRVYQGLIRC--SHPVIVLET       | 505 |
| DANTIO          | QYSQ--RMQBATCRSIVKVFVAMA---VRGP-VLWSPFSTVYQGLIRC--SKPVLLQSD     | 514 |
| ESHARK          | LYSA--RMQPCCRSIVKVFVALA---GKGP-VLWSPFSTVYQGLIRC--SKPVLLQSD      | 503 |
| BHARK           | LYSV--RMQPCCRSIVKVFVALA---GKGP-VLWSPFSTVYQGLIRC--SKPVLLQSD      | 504 |
| XENOPUS         | QYSL--RMQSSCKKAVKVFVLSA---GKGP-VLWSPFSTVYQGLIRC--SKPVLLQSD      | 519 |
| STERLET         | QYSQ--RMQPCCRSIVKVFVALA---GKGP-VLWSPFSTVYQGLIRC--SKPVLLQSD      | 508 |
| GAR             | QYSQ--RMQPACCRSIVKVFVAMA---VRGP-VLWSPFSTVYQGLIRC--SKPVLLQSD     | 503 |
| HUMAN           | QYSP--RMQVCCRSIVKVFVALA---AKGP-VLWSPFSTVYQGLIRC--SKPVLLQSD      | 499 |
| PLATYPUS        | QYSI--RMQSACCRSIVKVFVALA---GKGP-VLWSPFSTVYQGLIRC--SKPVLLQSD     | 499 |
| TASDEVIL        | QYSI--RMQVCCRSIVKVFVALA---GKGP-VLWSPFSTVYQGLIRC--SKPVLLQSD      | 500 |
| COELACANTH      | QYSQ--RMQPTCCRSIVKVFVALA---GKGP-VLWSPFSTVYQGLIRC--SKPVLLQSD     | 500 |
| CAECILIAN       | QYSV--RMQVCCRSIVKVFVALA---GKGP-VLWSPFSTVYQGLIRC--SKPVLLQSD      | 505 |
| CANARY          | QYTE--RMQPVCCRSIVKVFVLSL---GKGP-VLWSPFSTVYQGLIRC--SKPVLLQSD     | 495 |
| OSTRICH         | QYSE--RMQVCCRSIVKVFVLSL---GKGP-VLWSPFSTVYQGLIRC--SKPVLLQSD      | 466 |
| GECKO           | QYSI--RMQVCCRSIVKVFVALA---GKGP-VLWSPFSTVYQGLIRC--SKPVLLQSD      | 503 |
| TURTLE          | QYSV--RMQVCCRSIVKVFVALA---GKGP-VLWSPFSTVYQGLIRC--SKPVLLQSD      | 504 |
| ALLIGATOR       | RYSE--RMQVCCRSIVKVFVALA---GKGP-VLWSPFSTVYQGLIRC--SKPVLLQSD      | 464 |
| APLYSIA         | RVVK--KLQFVTVYKSLILLLLTLV---DKAA-VFQQLISTVYQGLIRC--SHPVLLQSD    | 499 |
| TRICHOPLAX      | YVIN--ELHSLCYKSLFELLALH---SKGA-ALKNFLSRVYQGLIRC--SHPVLLQSD      | 495 |
| SOFTCORAL       | ELGR--GQPFICLAKMLKFLALT---TRGA-SLKSFLSEIVYQGLIRC--SHPVLLQSD     | 499 |
| STONYCORAL      | ILNK--GGFLCCKALIRVFLHLS---SKGA-ILRNFLSEIVYQGLIRC--SHPVLLQSD     | 504 |
| SEA ANEMONE     | RLSK--SAKYLCHKALVKMLINIS---AKGS-VLKNFLSEIVYQGLIRC--SHPVLLQSD    | 501 |
| SEA CUCUR       | SIPV--RYRFLSHRALFRIFLVH---PKGT-CLQQFLSKVYQGLIRC--SHPVLLQSD      | 502 |
| LANCELET        | RLGK--KMHLCQKALIKVLLALV---PRGA-TLRTFLSRVYQGLIRC--SHPVLLQSD      | 506 |
| STARFISH        | RVPN--KYQYLSHQALILLVLIALS---SKGA-TLKNFLSRVYQGLIRC--SHPVLLQSD    | 502 |
| SEA URCHIN      | HQAR--SSQWTSHALIILLIALS---AKGT-SLQGFLSRVYQGLIRC--SHPVLLQSD      | 504 |

Supplementary Figure 6 CLUSTAL OMEGA ALL PHYLA, EXPANDED

|                 |                                                             |     |
|-----------------|-------------------------------------------------------------|-----|
| PARAMECIUM      | -----DGDLYIKTCQEM-SKFYIGIIEQ-KVWT----                       | 527 |
| TETRAHYMENA     | -----SMQEVYETLKSC-SQFKSLPNC-QLWT----                        | 541 |
| STYLNCHIA       | -----GGESPYESLQDA-VQFREWLNKDKIWS----                        | 527 |
| APHANOMYCESa    | GEMLYHP-----DTGLPESRLLFEY-EGLRWGCLKRMQG----                 | 543 |
| APHANOMYCESa    | EETLYHP-----DTGLPEPRLLFEY-EILWRNLLKRLKD----                 | 536 |
| PYTHIUM         | LMVLYHP-----ETGNIETKLLYEY-EDLVALLRGKKHTYKTK----             | 547 |
| PLASMOPARA      | -AVIYHP-----GTGELVTNLLIYEY-EGFLNFLRLRSERVVGIPI----          | 546 |
| BREMIA          | -VVIYHP-----NTGEFVTNLLFEY-EGFLAAILRLRTEGLVDAT----           | 545 |
| AEDES           | NQGRGPPE-----NSNWKDYITYRNY-LPLRGLLTPGSSL----                | 532 |
| MIDGE           | EEN--LEN-----VRDWKETITYKYL-LPLSRLLSPLDE----                 | 538 |
| BOMBUS          | ELQRL-N-----NLSEPRCLCYK-LPLQLLDDQMKYS----                   | 522 |
| ANT             | ELOQEL-N-----DLQMPVCYKYL-LPFTCLLAEERYA----                  | 533 |
| WHIPWORM        | NEQPVADE-----GYNGRQPTAANH-ASLRKLLAYDIV----                  | 539 |
| TRICHINELLA     | ESIVLA-----KDENTPHLAD-LPFLKMLDSEFV----                      | 537 |
| BEEBLE          | ELLETS-----SOKVVTIKDY-LNMLKSLKIVPVR----                     | 522 |
| BARNACLE        | ELQKDSAV-----SYADRPISYKY-LPLDALLAAHLR----                   | 537 |
| THRIP           | EILRDT-----QOKVITYENY-LPFWQLLLDTSN----                      | 500 |
| FLA             | FEE--NE-----DFYKNNISYKYL-LPLIGLLSQKDG----                   | 513 |
| WHITEFLY        | EFHKSE-----NMEVTSYKY-LPMLSELLRSLKRRH----                    | 525 |
| TICK            | EASREDDG-----TSQSRTITYRNY-SFLAYLLNAVAQV----                 | 522 |
| TERMITE         | ELQ--KG-----QPHENVFTYKY-LPLKELLSVNN----                     | 522 |
| DAPHNIA         | -----LSDSVKYL-TSLITLINFSGQANL----                           | 507 |
| OSTREOCOCCUS    | ALYR-----ASPVPMWR-LVELTLLGRVDDTV----                        | 551 |
| STENFOR         | SS-----NRFL-ELA-SKLWTGIQOCLAI----                           | 514 |
| KLBSORMIDIUM    | P-----DDPKWPL-LPFTCLLQPVVLSAA----                           | 535 |
| CLUBMOSS        | P-----ASDFLWKS-CDLQCQIITNISEPSHT----                        | 527 |
| MOSS            | E-----GSVQLWRH-VELSHLIDFSSD----                             | 522 |
| LIVERWORT       | D-----VGLPLWPH-VELSSLDSLKVSUGE----                          | 532 |
| LIGNANO         | SDTEAGSSPGSASDS---AADPVQGDASNSVRKISYKY-LRLWLCFLSLEKEKKL---- | 543 |
| COPEPOD         | QILDP-----DVLTFKYL-VPLNGILQSGNPP----                        | 524 |
| GLOBOSUM        | AGMDE-----LVAESREPTWKD-LVFNELTFVAK--NE----                  | 495 |
| PALUSTRIS       | VNDG-----QPAAVRPAFDY-LFVQLFKWTSAAEK----                     | 527 |
| NEOCALLIMASTIX  | FQKDSNESNEDDMDIDDQPANVINVIDEMAKENEHSYNDYYSFVKVLDKNNLPER---- | 551 |
| GLOMUS          | RSDLQ--NA-----NSKMDIVVAEHTYQEL-FFWENIFKDSSTLSWIIDQ----      | 555 |
| LOBOSPOR        | PSYR--I-----DQITITDQIAHWSYSL-LPLRNIFKPTVLEDLNK----          | 542 |
| SYNCEPHALASTRUM | NE-----TQVIVE-LAPESIFKYTEAQ----                             | 519 |
| FUNCTIVORUM     | ---E-----LEQPMY-LSKMISLQVQNERE----                          | 564 |
| HALBUM          | PHLNTG-----DTPWYEV-KEVYHLLHPKPSDISIRG----                   | 565 |
| DPURPUREUM      | ALITTS-----HTPFYEV-KDLVPLLNPTTESIDKD----                    | 571 |
| PVIOLACEUM      | GLITTG-----DTPFYQV-KEVYHLLNPSIDLGDIP----                    | 564 |
| AMPHIPOD        | AV-----PASV---PTGGRWFVGADEPVSCAS-FPLRALLCPTAASAVKC----      | 541 |
| SHRIMP          | SPGEGSSWRG--K---AGGGEWGLKNEVVFSSY-IPLTALMVPEKVANIKV----     | 548 |
| MUDCRAB         | LKKE-SELWKESENDS---EESGGWEGFKKEAVTYKYL-LPLKAIMPEKVSYVKI---- | 548 |
| TARDIGRADE      | DGLSSP-----PPAGSMGTKKSFSYKY-LPLNKLGCCTYMK----               | 550 |
| HYDRA           | IISTENL-----SKKDALITIKT-LPYNFLLEKKNYS----                   | 519 |
| SALPINGOBECA    | DMAED-----AVAQSY-LALRQLLKGSLV----                           | 539 |
| SPIDER          | EAMKDSITTKGE-----DNQKNDNFISASKIITYKY-LTLRMLNVVRFK----       | 552 |
| LIMULUS         | LIMULUS-----VETY-----DPRQITQNY-LSLHALLDIVNSK--L----         | 538 |
| SCORPION        | EARENMSGDN-----LELKY-----NPREITSKSY-SSLRNLLYIVRMK----       | 538 |
| ROTIFFER        | NQEDTSD-----TNEPMSIIVTTSLD-VMLSNFLGLQFS----                 | 538 |
| CIONA           | GRDSYVDLTDQVVG-----EDDLNDILLDPRITITYRD-IPLLALLGESEKK----    | 554 |
| OCTOPUS         | MEQPPG-----TGTFRVWSVKKEVSYKY-LSLSNLLKSSSLK----              | 528 |
| CAPITELLA       | QEAKE-N-----V-DEVNLKVDVSYQD-LPMLKALLTAGLKL----              | 537 |
| LIMPET          | EQTDDD-T-----LYNVDEKQISYKSY-LNINLLMSPEIK----                | 530 |
| SCALLOP         | EQTTEESTN-----PQPEGVMRKITYKY-LISLTLGLNSARIK----             | 538 |
| LINGULA         | GEVEAEVD-----MEMQSEKKITIKY-LDFNMLLGSSEHLK----               | 537 |
| OYSTER          | EDMTES-N-----QSEGTGKVTFKD-LIELDITLNSPRIK----                | 535 |
| SNAIL           | DENQEI-S-----TAETDLTVRQITYKY-LLEVNSGLLESGRKIK----           | 533 |
| SPONGE          | VQGDSDAVVT-----A-AAPLADSNKVMYSYLQ-VQLIQLIDYKRLK----         | 544 |
| PRIAPULA        | SSVFSQN-----A-----DDVDDDFQERDPRNITYID-MDMRHLLGSDRKMK----    | 547 |
| DANTIO          | ERGVSSGV-----SQ-----SEDSLVRSGKWKVPSKDY-LLEKGLLDCEMLK----    | 558 |
| ESHARK          | EGTGRSES--GL-QQ-----QSASEVMWTKWVPSYKY-LDLRSLLDGRMK----      | 549 |
| BHARK           | EEMTKAEPWSSA-QQ-----SLSNGMGTGKWRVPSYKY-LLELRSLLDGRMK----    | 552 |
| XENOPIUS        | DG--KEGSEAE--T---AAATGEVVRAGKWKVPTYKY-LDLRNLRLCDQLK----     | 563 |
| STERLET         | EEGG--QGGG--Q---PVEKQVHTGKWKVPSYRD-LDLRNLLECDKMK----        | 551 |
| GAR             | EEGAAQGAEGG--R---SAGAGQVRTGKWKVPSYRD-LDLRSLLDCLMK----       | 549 |
| HUMAN           | GP---ESESE--D---HRASGEVRTGKWKVPTYKY-VDLRHLSSDQMM----        | 541 |
| PLATYPUS        | EAYGRDASESD--D---SSAFGEVVRGKWKVPTYKY-LDLRSLNCDCEM----       | 545 |
| TASDEVIL        | EAFGKEVSESE--E---YPSGGEVTKGKWKVPTCKD-LDLRNLSCDQMK----       | 546 |
| COELACANTH      | EGIGKGLQSEEDAD---PAAPGEVRTGKWKVPSYKY-LDLRNLLECDKMK----      | 549 |
| CAECILIAN       | EGSGKSGPGSE--E---PPVAEEVRIKWKVPTYKY-LDLRSLLDCLMK----        | 551 |
| CANARY          | DFSVKETSGETE--E---AFEAGEVTRQSKLPTYKY-LYLRSLNCDTMR----       | 541 |
| OSTRICH         | EYFGKTSGETE--E---SPAAGEAGKWKVPTYKY-LYLRSLNCDTMR----         | 512 |
| GECKO           | ENSGKTSASE--E---HPASGEVRSKWKVPTYKY-LDLRSLNCDTMR----         | 549 |
| TURTLE          | EITGKVSLE--E---STFAEVRGKWKVPTYKY-LDLRSLNCDTMR----           | 550 |
| ALLIGATOR       | EFDGKASKSE--E---PPAVGEVRTGKWKVPTYRD-LDLRSLNCDAMK----        | 510 |
| APLYSIA         | SQSEDR-----LGMDDVPGANKVPTYKY-VPLLGLMDSERIK----              | 537 |
| TRICHOPLAX      | DSDLNI-----SQDSVILETGPRISYKY-LSLKNLIQATEIK----              | 533 |
| SOFTCORAL       | GVDAM-----EGVTEFDRHISYKY-LLENECLFDGGQYK----                 | 534 |
| STONYCORAL      | VNGESTIM-----EEREVEGTPNTSLKDY-LLEWYLLDKDKLK----             | 544 |
| SEA_ANEMONE     | GPDVVKQGVV-TGS-----RSDQVTFKY-LPLHEMLDKTKFK----              | 539 |
| SEACUKE         | AGVKDN-----QG-----TGGEEDDEVANRMTYKSY-LDLASLLDSQYLYK----     | 544 |
| LANCELET        | VTAEDIDLVA-SGE-----EGGEQQPPVPRFSYRD-LLEGNLLDSRLK----        | 554 |
| STARFISH        | SPSID--HPVL-GND---DQDTEADILADARHITYKY-VKLLASLLDSTHVK----    | 548 |
| SEA_URCHIN      | GGD-----E-GEE-----QRSDEMEIEQDSRRVSYKSY-MDLNTRLLDSEKTRIK---- | 545 |

Supplementary Figure 6 CLUSTAL OMEGA ALL PHYL, EXPANDED

|                 |                                                             |     |
|-----------------|-------------------------------------------------------------|-----|
| PARAMECIUM      | -----OHYLTKFKVQKLPDQIAQLIQNCN                               | 550 |
| TETRAHYMENA     | -----DETLEHFSAQFPQYIQLLENTD                                 | 564 |
| STYLOMCHIA      | -----EYTCQVVYVYQELIQRVIRIISDLN                              | 550 |
| APHANOMYCESa    | -----EELQAMVAMADMTLITLQRLD                                  | 566 |
| APHANOMYCESe    | -----QKNHGKIIDVPMKSIIEVFERLD                                | 559 |
| PYTHIUM         | REV---TPHT---S---SDT-RSEDTTITAIRGMLDLSLFKSVQAVVGGLN         | 589 |
| PLASMOPARA      | CIP-----TEAG---S---GDVQRIELKFKDRTLQAIILSDTVKHVLAIIIRKLN     | 589 |
| BREMIA          | PMP-----VETS---N---IDVPMGDHKNTRTLQAIIFDSTVKHVLDIISQLD       | 588 |
| AEDES           | -----SL-----DRGPLIKVIVYQMLKTLFLILDKLD                       | 559 |
| MIDGE           | -----NHEEISSLVYMHFINNLFKIVESLD                              | 563 |
| BOMBUS          | -----KDFKY---SRETQVIVDSTMHVGLALDKML                         | 551 |
| ANT             | -----NEQ-----LAQLVANTMDVYITLIDRLM                           | 557 |
| WHIPWORM        | -----DMSDFGYDSSTQKLEEVFVYVMWRMLIELIQTVK                     | 574 |
| TRICHINELLA     | -----DLSEFGFDRAMQVNIQRPLDFCFMKSFLIEIVRLLS                   | 572 |
| BEEBLE          | -----RFDKFRIFLQERKYIIVLVKIDKLMRLLILINKLN                    | 557 |
| BARNACLE        | -----QLTRKGVSAALQALANEVFAALVDASQKIISELD                     | 572 |
| THRIP           | -----KRLLEASIEEKRDISRALVSKILDSVQDIINRDL                     | 535 |
| FLEA            | -----VQKELSLRIVYDNIIMKAPPAINKLD                             | 538 |
| WHITEFLY        | -----SIEPTIP-ECEAARIRKLLYRHLIDSALLVIDRDL                    | 559 |
| TICK            | -----ELNMQIISLDARQMLVRDVYDGLLSALSIVSKLN                     | 557 |
| TERMITE         | -----FQKRSTLSQTQLIVVYVYKLVNTVLVLMKKLD                       | 556 |
| DAPHNIA         | -----PFSLERAYVSAIIEQLVSAVSTIISRLD                           | 537 |
| OSTREOCOCCUS    | -----SRYSLESDRDIQIATAAVYGSFVELLNFCITML                      | 585 |
| STENTOR         | -----IL-----DMQEIIGSFPY---HQISTLE                           | 535 |
| KLEBSORMIDIUM   | -----QNPREEASS-EA-DSETPVASRISVNAADYAMRELVYDSLVQNMLTIVGGLD   | 587 |
| CLUBMOSS        | -----ENLQDD-----DGIVGVDLAVLNVNVDLKTITPDSLIRSIIMKLMELN       | 571 |
| MOSS            | -----OGLQLEAGLD-EAESFEELVTSVDGNVGIIESSLESYDIAMHCIVKMNELN    | 575 |
| LIVERWORT       | -----QGAVPVAETD-DEHMSGEL---LLGNGTDTVTEIQGLVFDITVRSIMKALTELN | 582 |
| LIGNANO         | -----CDYVGMSAEARSISGGIFDAFLSSVLAIERLD                       | 577 |
| COPEPOD         | -----S-----RSRILDSFLRSIFLIVDKLD                             | 545 |
| GLOBOSUM        | -----AWDESKVHDFRSLLYDGMVTALILEPGNLN                         | 525 |
| PALUSTRIS       | -----RLDSEDRKKLDMLVDETMKALIQLPQNLN                          | 557 |
| NEOCALLIMASTIX  | NEPKM-----EDDTLVEDENKRNQFIQKLYDII IQTLIDFPKHLN              | 591 |
| GLOMUS          | SGFLI-----DENRL---NTIQLEFFSILYDEFISSVFKMIRTLN               | 592 |
| LOBOSPOR        | TRIDI-----S-----GEDLERFLCVVYGTMESFKRILILLN                  | 575 |
| SYNCEPHALASTRUM | -----P-----SDLEDQFLGLLYDSFLTALLRLKLFM                       | 547 |
| FUNCTIONIVORUM  | ASSAS-----SAYQSFKAEKESKVFVYSLMGCMILFPQVE                    | 604 |
| HALBUM          | IOMEVEQHVQVKQEKEKEK---EKEKDSISISTSEDIQQLLYNEIVQMTITIRKLD    | 622 |
| DPURPURUM       | LASSSKPQQQNNSSAINNDKHNIIIVTVKKEIQAQIIPKLVYNEIISSILVVIKGLD   | 631 |
| PVIOLACEUM      | EAFRL-----KSNIQEVENTSIRKLIYDEMISILSLDKLD                    | 601 |
| AMPHIPOD        | SVLSV-----T-CVTEVAVSRRSAVCSALTEFSSAADLILGQLD                | 580 |
| SHRIMP          | SGMPA-----T-VMTEM-----SNFIYSEFISCIIEISEKLD                  | 579 |
| MUDCRAB         | PGVST-----T-ILTEI-----SSKLYSEYITSTIEIAEKLD                  | 579 |
| TARDIGRADE      | -ELH-----ASEVELQRTSKLIFDEFIKATIKMIDAMN                      | 586 |
| HYDRA           | -ISVY-----SRSELCAVKELLYDCILSAFNLVNLKLN                      | 552 |
| SALPINGOECA     | -KIPD-----E-----EMTHEDRNAMRLTYDETLKAFHLINKLN                | 574 |
| SPIDER          | -ELNS-----L-----NIPLERQYLMBCIYDEIIRSSLNLINKLD               | 587 |
| LIMULUS         | PEVGT-----L-----QVPLAERQSLAENVYDEI IQAVFAVLKLD              | 574 |
| SCORPION        | -ELNH-----L-----GILSEDRHNLQLIYDEIISVVTLKLD                  | 573 |
| ROTIFER         | -DLKS-----D-----NLDKIKVIEIIFNEYESLIKMKLD                    | 571 |
| CIONA           | -FVPY-----AVND-ILMCGHRKVCHEMYTAAFKAIVAIVDKLN                | 592 |
| OCTOPUS         | -ELST-----V-----GYFSRDREKLTQLLYDEIITSVIHIIEESLD             | 563 |
| CAPITELLA       | -ALGO-----Y-----NITABQHRVLAASAIYDELSSAMLKMSRLD              | 572 |
| LIMPET          | -VVLF-----E-----SFALFILQTLTDALYNELMNSVIKVLNKLD              | 565 |
| SCALLOP         | -DFSV-----A-----DISLDRHRLTEVLYDEL IACVLKILCKLD              | 573 |
| LINGULA         | -VH-----S-----KLTPEKSALTAQIYDELVRSKTLILSKLD                 | 570 |
| OYSTER          | -EFSV-----A-----DISVEVRLALTEAVYDELINSVRLMKGKLD              | 570 |
| SNAIL           | -DLIQ-----D-----GIGAERDQLTHAVYNEMLQAILKVISKLD               | 568 |
| SPONGE          | -GMGM-----D-----FDLELRQSIHQVLVYSEFTQSLNLILRKL               | 578 |
| PRIAPULA        | -GLNE-----L-----GVSMSTRKALTCVYDEIIVTSLMKIVGKLD              | 582 |
| DANTO           | -DTGF-----V-DGAPAARNYNLRDLNRHLYDALVQSVMKIVEKLD              | 597 |
| ESHARK          | -EFGI-----V-DTLQIMNPLQSLNRLLYDEL IKSILKIIIEKLD              | 587 |
| BHARK           | -ESGL-----IYFTFQMFDSPLKSLNRLLYDEL IKSIVLKIIEKLD             | 591 |
| XENOPUS         | -DSIF-----SDEIFSTVNSPLQSLNRLLYDEL IKSILKIIIEKLD             | 602 |
| STERLET         | -DTGF-----V-DGAFDVRSSSLHSLNRLLYDEL IKSILKIIIEKLD            | 590 |
| GAR             | -DFGF-----L-EGVFESQAPLQSLNRLLYDEL IKSILKIIIEKLD             | 588 |
| HUMAN           | -DSIL-----ADEAFFSVNSSESLSNHLLYDEFVKSIVLKIIEKLD              | 580 |
| PLATYPUS        | -DSQL-----DETFLIVNSPLQSLNRLLYDEL IKSIVLKIIEKLD              | 583 |
| TASDEVIL        | -DSL-----ADEFTLLVNSPLQSLNRLLYDEL IKSILKIIIEKLD              | 585 |
| COELACANTH      | -QSAL-----VDETFGVNSPLQSLNRLLYDEL IKSILKIIIEKLD              | 588 |
| CAECILIAN       | -ESIF-----SDEVF-SVNSPLQSLNRLLYDEL IKSIVLKIIEKLD             | 589 |
| CANARY          | -ESVF-----EDANFLTEKALQSLSRVLYDEL IKSIVLKIIEKLD              | 580 |
| OSTRICH         | -ESVL-----EDENFLAANSALKSLSRLLYDEL IKSIVLKIIEKLD             | 551 |
| GECKO           | -DSLL-----ADENFLMANSPLQSLSRLLYDEL IKSILKIIIEKLE             | 588 |
| TURTLE          | -ESVL-----ADFTLLANSPLQSLNRLLYDEL IKSILKIIIEKLD              | 589 |
| ALLIGATOR       | -ESVF-----ADENFLTVNSPLQSLNRLLYDEL IKSILKIIIEKLD             | 549 |
| APLYSIA         | -DLAA-----E-----DFTLADRRELTKAVYSQMLAALMKILRKL               | 572 |
| TRICHOPLAX      | -GLTL-----I-----TTDREHIIYVQSRLYNELLHSLQRLILKLD              | 568 |
| SOFTCORAL       | -DQSI-----M-----PKVSSLTQDIIHRAIYDEL IQAALKVAHKLN            | 569 |
| STONYCORAL      | -DESL-----L-----GKQLEERKVMHGLVYDEMIIGILRIIHKLD              | 579 |
| SEA ANEMONE     | -MYLL-----FQSLSLSDIEKRESLHELIVYDELVGAALRIIHKLD              | 578 |
| SEACUKE         | -EIDA-----M-----GMTYVERKKIHATLVNEMMSMMKILTKLD               | 579 |
| LANCELET        | -ELSQ-----W-----GVAVADRQAMHRMLYDELVTSVLKIIVDKLD             | 589 |
| STARFISH        | -EVQA-----M-----GMNYADRRKIHIILYDEL IFSILKILSKLD             | 583 |
| SEA_URCHIN      | -TSEA-----H-----GSSYAERLANIHTMIYNELIGGILKILRKL              | 580 |

Supplementary Figure 6 CLUSTAL OMEGA ALL PHYLA, EXPANDED

|                 |                                                         |     |
|-----------------|---------------------------------------------------------|-----|
| PARAMECIUM      | FESIQKEVNIIDEQNIQQQ-----                                | 568 |
| TETRAHYMENA     | LSYKVVVYVQIIEDEILKDKN-----QMBIEQDKESKIQ-----D           | 598 |
| STYLNCHIA       | ITYYKVERGRNNKDNQD-----ESNNNNRGRDPQILNQELT               | 587 |
| APHANOMYCEsa    | LRVQLEADTAE-----                                        | 577 |
| APHANOMYCEse    | LRVQKQENKTE-----                                        | 570 |
| PYTHIUM         | LAYQYLDQDGA-----                                        | 600 |
| PLASMOPARA      | LSYQFDSQTTKI-----                                       | 601 |
| BREMIA          | LSYQFDLHATNN-----                                       | 600 |
| AEDES           | LSTRKRTV---RDD-----SGE-DQD                              | 576 |
| MIDGE           | LSTKRRKF---YDE-----SNMVEKE                              | 581 |
| BOMBUS          | LCT-KTKE-----D                                          | 559 |
| ANT             | LNVKRTNE-----D                                          | 566 |
| WHIPWORM        | LNAKTVE-----DASPE                                       | 587 |
| TRICHINELLA     | FETKAFQD-----VEEYT                                      | 585 |
| BEEBLE          | VSVTLNDN-----S                                          | 566 |
| BARNACLE        | LSTQPLDG-----DAP                                        | 583 |
| THRIP           | LSLQENNS-----SES                                        | 546 |
| FLEA            | LSTKRRVK-----NKSNDDD                                    | 553 |
| WHITEFLY        | LSTVRKED-----DENQ                                       | 571 |
| TICK            | LSVRQOAS-----SDDGEAR                                    | 572 |
| TERMITE         | LSTRKKTNIHALSTS-----GGASEAD                             | 578 |
| DAPHNIA         | LSTSEENSSEDE-----                                       | 549 |
| OSTREOCOCCUS    | LGIIVTSGLSTSLQDD-----EVDVA                              | 607 |
| STENTOR         | LSYSIN-----                                             | 541 |
| KLEBSORMIDIUM   | LRVDVRAPSKEAAPSEED-----EGKTSED                          | 613 |
| CLUBMOSS        | LKYRVKDLANKANS-----EFSG                                 | 589 |
| MOSS            | LKYRVKPARTG-KYSEE-----LDAGP                             | 596 |
| LIVERWORT       | LKYRVRASNLSTAQEE-----ADSSL                              | 604 |
| LIGNANO         | LSACRLSDLEPPVTAASEASS-----SSA---TTDEDSA                 | 608 |
| COPEPOD         | LTVVHDGEDEVQPEPEEQSM-EI-----SL---TQSDV---DAVRVSP        | 581 |
| GLOBOSUM        | LSVRETPGDS-----DASTV                                    | 540 |
| PALUSTRIS       | LSLTVNQA-----                                           | 567 |
| NEOCALLIMASTIX  | LALYDEINNNGRINDNANSNTDN---EMEENVITITSTMRSGENNN---EIIENK | 640 |
| GLOMUS          | LAVTEASDVSLGTSITKNDHEV-----D-ANLIA                      | 621 |
| LOBOSPOR        | LTVSESETD-LE-EGVDADIKV-----IDV-----D-----PMSVSTV        | 606 |
| SYNCEPHALASTRUM | LELTSBAAPDAELHMPRRSRTGI-----ADE-----K---DT---RV         | 578 |
| FUNCTIVORUM     | LSIDKMGGE-----                                          | 615 |
| HALBUM          | LSYSTKEEERQEKELKQQVKDKDGEEKEE-EEEQEEDVT---MEDQQD        | 676 |
| DURPURUM        | LQYSKDTASDSQK-----S-K---DEEEKD-----ISI                  | 659 |
| PVIOLACEUM      | LQYSKKEELNNNNNNNSQ---KDKDLIDQLEEE-E---EDENNAT-----IKT   | 645 |
| AMPHIPOD        | LSTQQQQQQEDELPPQ-----A-----LDATDEN                      | 605 |
| SHRIMP          | LTTYKQNELQQQE---E-----V-----SGSDEGD                     | 601 |
| MUDCRAB         | LSTFKQEIETND-----ITSDDGD                                | 599 |
| TARDIGRADE      | LQLETESEDDRVT-----                                      | 600 |
| HYDRA           | FVTENKAE-----KLR                                        | 564 |
| SALPINGOECA     | LTHSSDAEDEDVA---VATSGVK-----EEEPHEV                     | 603 |
| SPIDER          | LSLQQPEFYGKEDD---N-----ES                               | 604 |
| LIMULUS         | LSSSENTVDSVEVAD---QLS-----                              | 592 |
| SCORPION        | LATTSHMQDSSEIKDS---NLKQ-----FETSELY                     | 599 |
| ROTIFFER        | LAAYKNDGSEVNGE---QENV-----DRKQSDL                       | 597 |
| CLIONA          | LEPSAENKEVIEIEN-----                                    | 605 |
| OCTOPUS         | LTIINTSISQDVVIQP-----SAST-----ISPMDSP                   | 589 |
| CAPITELLA       | LSSNSTDSESQPST-----SEPALS                               | 592 |
| LIMPET          | LSTSTTELTEQDME---ASTSGG-----DVTMETD                     | 593 |
| SCALLOP         | LSTSTSELSSQSDQ---NSKAGAS---GEGLEEG                      | 602 |
| LINGULA         | LTSVRGSEDTDQGS---AGT-ADK---GRPVTPF                      | 598 |
| OYSTER          | LTSQSSTEVAQQQEG---PTS---SNESE                           | 593 |
| SNAIL           | LSTSTQRESE---TSG---TEE---EKSDI                          | 589 |
| SPONGE          | FVTASTTEDGIMANESEGGG---GSGGDP                           | 605 |
| PRIAPULA        | LSTSKSTDPQVHDGSGGAS---SESPDAY                           | 609 |
| DANTO           | LSVKVSADEVQ-S---D-ASAGI                                 | 617 |
| ESHARK          | LSVEKQKREESGSG---DVSNQNV                                | 609 |
| BHARK           | LSVDKOSONEEGSGG---DVNSSIV                               | 613 |
| XENOPUS         | LSLQKDTGQE-DDG---GINLLI                                 | 623 |
| STERLET         | LSVQKSADEQEGRS---DASSML                                 | 612 |
| GAR             | LSVKQNFDELE-ES---DVSSGVV                                | 609 |
| HUMAN           | LTLTIQTVEQENGD---EAPGVWM                                | 602 |
| PLATYPUS        | LNVEKQNTGEX-DES---EVSNLWV                               | 604 |
| TASDEVIL        | LKLEKQVGNQEDS---EASGVVV                                 | 607 |
| COELACANTH      | LNVRQKRVGDQEGET---DPSSSTII                              | 610 |
| CAECILIAN       | LTVKQVSGEQDAS---DEDSALV                                 | 611 |
| CANARY          | LTVOKLDISEQ-DGN---AGDSALV                               | 601 |
| OSTRICH         | LTVOKLNVNEQ-DED---EFTSALV                               | 572 |
| GECKO           | LTVOKRVNDKADAN---EADADLT                                | 610 |
| TURTLE          | LTVOKLNVSEQ-DEN---EAGSDLV                               | 610 |
| ALLIGATOR       | LTVOKLTFSEQ-AES---ESGDVMI                               | 570 |
| APLYSIA         | LEATVADSALLEGDAE---MEERE                                | 592 |
| TRICHOPLAX      | LTSQQTTIEETE---QSS                                      | 584 |
| SOFTCORAL       | LSSFRDVTQDEDLQTE---QPSSPD---APLLTTS                     | 599 |
| STONYCORAL      | LSSKSGSAQEGDILGKSASDVPA---SATADKE                       | 611 |
| SEA ANEMONE     | LSTTKHGQDL-Q---VRD---QPQEQE                             | 600 |
| SEACUKE         | LSATKSAQEGE-IQGE---VSN---ADTNTSL                        | 604 |
| LANCELET        | LTTSKQVETGN-EE---LTA---DVSGSQD                          | 612 |
| STARFISH        | LTSNKDTTELQ---D---QVA---VSDSSTE                         | 605 |
| SEA_URCHIN      | LSSNKHEEA-ST---SGG---VTSLEG                             | 603 |



Supplementary Figure 6 CLUSTAL OMEGA ALL PHYLA, EXPANDED

|                 |                                                                |     |
|-----------------|----------------------------------------------------------------|-----|
| PARAMECIUM      | ----NLLNLVLKIRKYPKALLLLIPARVLL----KYIKETQLINQ-----             | 651 |
| TETRAHYMENA     | ----QFYKSIILKLRKLPRLVLLKLRCLN----EYIEKNNILKG-----              | 681 |
| STYLNONCHIA     | ----QFTDTLKKASQTPRIKLLKLLKVCMQICSNHRYFEVSDIDS-----             | 676 |
| APHANOMYCESa    | ----LVVQWMLPSARQLPLVSAFVRLATVISHLLANSAA---S-R-----             | 656 |
| APHANOMYCESa    | ----LFLKWIIFSRRESPLVSVLRLATVTVSRILAIEVVS-----                  | 645 |
| PYTHIUM         | ----ILLMLVIEKSDDELPLVSGFVIRVRLTVSKETKYFDMERDIT-----            | 684 |
| PLASMOPIARA     | ----LIMNQIFASICDLPLVSCFVRICTVMTKAMHELNYFKSASS-V-----           | 685 |
| BREMIJA         | ----LIVEQIISLAAKAPLVSCFVRICTVVAAMNGLVYFESPAT-L-----            | 684 |
| AEDDES          | ----IFYDYVVRKSVKHPVLSGFKLIDGLFTANQLQYQFINFIPLO-----            | 667 |
| MIDGE           | ----MMLENSIKLSFKHPVLSGFKLILETALKVINRNLAVTN-----                | 667 |
| BOMBUS          | ----KFLLKVISKSHKMLVSGFKLVHAIKSHKICELSSDBE-----                 | 641 |
| ANT             | ----RLVEYVRLSYKPLISGFKLIRVCMKFAHLEEBEKTEEBE-----               | 655 |
| WHIPWORM        | ----PFFSVLVKRTIENLNVSGFKLLSYCIAAAEKSLFDVSISE-----              | 674 |
| TRICHOINELLA    | ----PMLTMLLELSSRYPMVSGFKLLAWVWMAEKLNYPNTEQD-----               | 672 |
| BEEFLE          | ----KLIHYLAKCEKHLLISGFKLLSFCLKICKDINYPNSSC-----                | 651 |
| BARNACLE        | ----LISQVAVTSVQRPLVSGVRLRLARIYLLTAGRLGCWQAVQEN-----            | 671 |
| THRIP           | ----PLLILYKICLSSKHPVLSGFKLLANIVRIAENLDYFBEQKDE-----            | 634 |
| FLEA            | ----TYLKEVINCSYKFPVIAAGFKLSSYGLDFCDICEYFDHYEES-----            | 622 |
| WHITEFLY        | ----RFGRSIIDFSVRFPLVSGFKLIATLQIADKQYFKTETTS-----               | 658 |
| TICK            | ----VVVQMVESARHPVLSGFKVVAASIGICEKSSYFEPQS-----                 | 657 |
| TERMITE         | ----PFFYKVISSSNKPLVSGFKLLTVALQLCDRLHYFSDYGD-----               | 665 |
| DAPHNIA         | ----PLGEAVIGLSMKFPLIPHLVRLIATLLSIIIGQVLPV-----                 | 627 |
| OSTREOCOCCUS    | ----HLSDELMRMANQNSLSGFKLIGAVISAANRGGYFSLNLSKAE-----            | 695 |
| STENTOR         | ----PILILSKKITLPLPLSLIIFKVSFQIIVSNVNSDQLQ-----                 | 620 |
| KLBSORMIDIUM    | ----TFCRNVIALSDQPLISGFKLLAVAIRVGDALYFAEETSAAEP-----            | 703 |
| CLUBMOSS        | ----PFCRCLIDLRSKYPVLSGFKLLAAVVISIGDQKGFPEKQDS-----             | 674 |
| MOSS            | ----PFGRCIIELSNRYPLISGFKLLTVNITIANREGFLSVAGEDSLD-----          | 686 |
| LIVERWORT       | ----PFCSCVMELSHQYPLISGFKLLTITITIGADSIGFQSKDLCKVS-----          | 694 |
| LIGNANO         | ----PLCQALIEKSAENPLISGFKLLATFVTRADAGYFNDQPVVVM-----            | 698 |
| COPEPOD         | ----RLWYKISVMAYEHDVSGFKLIPANKLELD-PVKYIE-----                  | 661 |
| GLOBOSUM        | ----VVGQKFIYSYTONPLVSGFKLIFGVVLLALSDSLKYSVPTRNE-Q-----         | 629 |
| PALUSTRIS       | ----IVGNKWIELSLKPMVSGFKLVSVILRLSKSTGPFEGALAPD-R-----           | 656 |
| NEOCALLIMASTIX  | ----SPGKEIISFSGKYPVLSGFKLFECLLISEDLQYFNILKKE-Y-----            | 730 |
| GLOMUS          | ----LAGDTLITFSTRYPVLSGFKMLGSLTVCSIKFDPGKIRVND-----             | 710 |
| LOBOSPOR        | ----VIGSTLIELSKHPVLSGFKMFMATCLQVCQSIISLFPQKQSLM-E-----         | 695 |
| SYNCEPHALASTRUM | ----IAGSELIQLSVRQPLVSGFKMLSTIATIDRRTGCFQESQKLY-H-----          | 667 |
| FUNKIVORUM      | ----LAKELILKSHQCPVLSGFKLFTLLANASREHAYSTTDP-DM-----             | 701 |
| HALBUM          | ----IFGKEIIFGSRKYPVLSGFKLLHVLKAKVKNYGPIDG-SNKS-SS-LD-----      | 770 |
| DUPURPUREUM     | ----IFGKEMINYSKYPVLSGFKLQIVMKICKSOKYPTNTHI-EIIF-QF-IL-----     | 753 |
| PVIOLACEUM      | ----ILIGKDMIFNSKRYPLISGFKMLIQVMEVTKKESYFYSIQD-NEK-----         | 734 |
| AMPHIPOD        | CEAAVTSAFCVVAREIPVLSGFKLALLTVLLRYLHAHQWQRQD-----               | 704 |
| SHRIMP          | ----RLVWFVVTQSSLPVLSAHVNTATVLTCSRQTFQFSRQD-----                | 687 |
| MUDCRAB         | ----RLCWFFIRCSSEQLPVLSAHVNTATVLTCSRQTFQFSRQD-----              | 685 |
| TARDIGRADE      | ----QFCQLIMKLSKPNVLSGFKLLEVWFRRLRSKPEHDKMLKDRQTDLSPLSAE-----   | 697 |
| HYDRA           | ----IFVEETLKFMSKLPVLSGFKLRLHSLVSEQIGYFEANNH-S-----             | 651 |
| SALPINGOBECA    | ----IYSDIVTRSSKYPVLSGLKLELANTIATEQRYFEAASK-T-----              | 690 |
| SPIDER          | ----VFGKEMIFVAVKYPVLSGFKLISMLNSICSKIGYFKTLSS-N-----            | 691 |
| LIMULUS         | ----TFGMEIIEHATRSRPSVSGFKLAAVCLKICSRKIKYFKMINT-L-----          | 679 |
| SCORPION        | ----IFGLEIIQFINRMPVLSGFKLITVCLTICKTRAFQVYKVK-L-----            | 686 |
| ROTIIFER        | ----KLSKEIILLSTSHLISGFKLALTLIMKNAVKIKYFNKIDS-I-----            | 684 |
| CLIONA          | ----DLICFMVKESEKYPVLSGFKLISLMLISIKLYPEDEHE-V-----              | 692 |
| OCTOPUS         | ----RYCNLVKLISTSTPLVSGFKLRLTVMCKIARDLHYFEGISID-----            | 676 |
| CAPITTELLA      | ----PFGHOLLQSSKLPVLSGLKMLTVMCMQVSAQISYFKEMNR-QL-----KI-ET----- | 684 |
| LIMPET          | ----TFSHNIIILLSTQNPVLSGFKLLALCMKISNKLAYFOVNES-N-----           | 680 |
| SCALLOP         | ----TFCHKVILCSTDNPLVSGFKLLAMSMKISNKLNFVKMLY-LD-----VM-GT-----  | 694 |
| LINGULA         | ----TFGHQLIVMSTKYPVLSGFKLLAICMHATRTAYFKDISL-S-----             | 685 |
| OYSTER          | ----LFSHTLILQSTTEKPLVSGFKLLAVSMKIANKLNYPQMGVS-L-----           | 680 |
| SNAIL           | ----TFHTVVVQSTTEFPLVSGFKLLAVTMKIANKLEYFKDIAV-E-----            | 676 |
| SPONGE          | ----TFSQEVSLATRYPLVSGFKLLTVCLSI CNKTHFFDVIDL-S-----            | 692 |
| PRIAPULA        | ----TYGHEVILLSTRWPVLSGLKLLTVCLSI CSSLQYFKAMRK-V-----           | 696 |
| DANTO           | ----PLCHELILQSTRIRPLVSGFKLLSLSMGIARKTQYFQDVQV-C-----           | 704 |
| ESHARK          | ----RFGYELILRSTQPLVSGFKLLSVMKIARKIKYFEGVSP-K-----              | 696 |
| BHARK           | ----RFGHELILRSTQPLVSGFKLLSVMTKIARKIKYFEGVSP-K-----             | 699 |
| XENOPUS         | ----VFGYELVQSTRPLVLSGFKLLSVMKNAKRSRYFEGFTS-K-----              | 710 |
| STERLET         | ----GLGHELILQSTRPLVSGFKLLSVMKIARKIKYFQGVSP-R-----              | 699 |
| GAR             | ----PLGHEIILQSTRPLVSGFKLLSVMKIARKIKYFQGVSP-K-----              | 696 |
| HUMAN           | ----SFGYELILQSTRPLVLSGFKLLSITVRNAKIKYFEGVSP-K-----             | 689 |
| PLATYPUS        | ----SFGYELILQSTRPLVLSGFKLLSIAIRNAKMKYFEGVSP-R-----             | 691 |
| TASDEVIL        | ----SFGYELILQSTRPLVLSGFKLLSIAIRNAKMLKRYFEGVSP-K-----           | 694 |
| COELACANTH      | ----GFGHEVILQSTRPLVLSGFKLLSVMKIARKIKYFEGVSS-K-----             | 697 |
| CAECILIAN       | ----TFGYELILQSTRPLVLSGFKLLSVMKNAKRTKYFEGVSP-K-----             | 698 |
| CANARY          | ----SFGYELIVHSTRPLVLSGFKLLSVMTKIARKIKYFEDISP-R-----            | 688 |
| OSTRICH         | ----SFGYELIHSSTRPLVLSGFKLLSVMKIARKIKYFEGVSP-K-----             | 659 |
| GECKO           | ----SFGYELILQSTRSPVLSGFKLLSIAKIKYFEGVSP-K-----                 | 697 |
| TURTLE          | ----SFGYELILQSTRPLVLSGFKLLSVMKIARKIKYFEGVSP-K-----             | 697 |
| ALLIGATOR       | ----SFGYELILQSTRPLVLSGFKLLSVMKIARKIKYFEDVSP-G-----             | 657 |
| APLYSIA         | ----TFAHTLVVMSTRHPVLSGFKLLSVMITLADKLSYFKAFDS-Q-----            | 679 |
| TRICHOPLAX      | ----PFGKMLVLLSTRPLVLSGFKLLEIMTIISSLSYFEDLNI-E-----             | 671 |
| SOFTCORAL       | ----TFGKELVVLARSFPLVSGFKLLDIVMKISRKLDYFKGMTL-K-----            | 686 |
| STONYCORAL      | ----MFCRDIIMSSRFPVSGFKLLEVCMKCKELSFKNKA-E-----                 | 698 |
| SEA ANEMONE     | ----VFGDRDIVSSRFPVSGFKLLEVCMKICKRLRFQYEVY-TA-----              | 687 |
| SEACUCUKE       | ----QFGHOLLQSTRPLVLSGFKLLTACMVICQRTKYFKPGK-A-----              | 691 |
| LANCELET        | ----TVGHALILHSTRPLVLSGFKLLSVMCMICTKRYFKDLDT-K-----             | 699 |
| STARFISH        | ----RFGHEVILLSCRPLVLSGFKLLTVMCMICTQIQFFKCIK-P-S-----           | 692 |
| SEA_URCHIN      | ----RFGHELILQSSQLPVLSGFKLLTICMTMSRRTAFKVEVNP-N-----            | 690 |

Supplementary Figure 6 CLUSTAL OMEGA ALL PHYLA, EXPANDED

|                 |                                                               |     |
|-----------------|---------------------------------------------------------------|-----|
| PARAMECIUM      | -----Q-----                                                   | 652 |
| TETRAHYMENA     | -----L-----                                                   | 682 |
| STYLNCHIA       | -----V-----                                                   | 677 |
| APHANOMYCESe    | -----                                                         | 656 |
| APHANOMYCESe    | -----                                                         | 645 |
| PYTHIUM         | -----                                                         | 684 |
| PLASMOPARA      | -----                                                         | 685 |
| BREMIA          | -----                                                         | 684 |
| AEDES           | -----R-----                                                   | 668 |
| MIDGE           | -----                                                         | 667 |
| BOMBUS          | -----                                                         | 641 |
| ANT             | -----E-----                                                   | 656 |
| WHIPWORM        | -----                                                         | 674 |
| TRICHINELLA     | -----                                                         | 672 |
| BEEBLE          | -----                                                         | 651 |
| BARNACLE        | -----S-----                                                   | 672 |
| THRIP           | -----M-----                                                   | 635 |
| FLEA            | -----                                                         | 622 |
| WHITEFLY        | -----T-----                                                   | 659 |
| TICK            | -----                                                         | 657 |
| TERMITE         | -----L-----                                                   | 666 |
| DAPHNIA         | -----                                                         | 627 |
| OSTREOCOCCUS    | -----                                                         | 695 |
| STENTOR         | -----                                                         | 620 |
| KLEBSORMIDIUM   | -----D---ADGDVPMSEASPFLGVPPGDREQCTELFRKFLREVLVAKTHSLLPAGEIASP | 756 |
| CLUMBOSS        | -----                                                         | 674 |
| MOSS            | -----A-D-----GG-YM-----NLDKKRDSTTFAG----                      | 705 |
| LIVERWORT       | -----G---HDAEMVTEEE-WK-----VLLRAPKQLEPOR-----                 | 722 |
| LIGNANO         | -----E-IADTNTMESDNQ-----DSQ--TDNDEEG-----                     | 721 |
| COPEPOD         | -----                                                         | 661 |
| GLOBOSUM        | -----GM-D--YDSV-E-----                                        | 637 |
| PALUSTRIS       | -----KE-I--YEGT-EED-----                                      | 666 |
| NEOCALLIMASTIX  | -----IGES--HKGM-INE-----                                      | 741 |
| GLOMUS          | -----ENIM--IQDS-QDQ-----                                      | 721 |
| LOBOSPOR        | -----RI--KIE-DDT-----                                         | 703 |
| SYNCEPHALASTRUM | -----EQ--HEG-INA-----                                         | 675 |
| FUNGIIVORUM     | -----                                                         | 701 |
| HALBUM          | -----ANG---GEDDSMEIDSG-----K-----S-----                       | 786 |
| DPURPUREUM      | -----SNKENKLENDLMEIEN-----N-----N-----                        | 772 |
| PVIOLACEUM      | -----DLDENNTADT-----M-----I-----                              | 747 |
| AMPHIPOD        | -----                                                         | 704 |
| SHRIMP          | -----                                                         | 687 |
| MUDCRAB         | -----                                                         | 685 |
| TARDIGRADE      | ASENQDLDEAEVKMEVDDD-----A-----                                | 717 |
| HYDRA           | -----                                                         | 651 |
| SALPINGOECA     | -----AETA-----                                                | 694 |
| SPIDER          | -----TEE---MS-QEFSN-----                                      | 701 |
| LIMULUS         | -----LRPKE---CESMQVDD-----                                    | 692 |
| SCORPION        | -----KTKEE---IS-M-----                                        | 694 |
| ROTIIFER        | -----QTNLWTSDDSDVHLIED-----CDD--PDSS-MY-----                  | 710 |
| CLONA           | -----AEESEMHDGI-----R-----                                    | 703 |
| OCTOPUS         | -----NLKIT-----ED-----                                        | 683 |
| CAPITELLA       | -----SD---SIRMEMDEE-----F-----                                | 696 |
| LIMPET          | -----                                                         | 680 |
| SCALLOP         | GSPNKS---ADFMDVDQDQ-----V-----                                | 710 |
| LINGULA         | -----RDQD---GENSMIVEE-----K-----                              | 700 |
| OYSTER          | -----SPVKK---EVKMEVDS-----Q-----                              | 695 |
| SNAIL           | -----NSFKK---EEQMDVDET-----G-----                             | 691 |
| SPONGE          | -----GQGTG---DDVA-----                                        | 702 |
| PRIAPULA        | -----NDSQLH---SEAMETDS-----                                   | 710 |
| DANTO           | -----P--KQV-----                                              | 708 |
| ESHARK          | -----TWKQC-----                                               | 701 |
| BHARK           | -----TRKQC-----                                               | 704 |
| XENOPUS         | -----IYKKA-----                                               | 715 |
| STERLET         | -----SCKTS-----                                               | 704 |
| GAR             | -----SFQPN-----                                               | 701 |
| HUMAN           | -----SLKHS-----                                               | 694 |
| PLATYPUS        | -----SLKKS-----                                               | 696 |
| TASDEVIL        | -----SHKKS-----                                               | 699 |
| COELACANTH      | -----SCKQN-----                                               | 702 |
| CAECILIAN       | -----SHKCC-----                                               | 703 |
| CANARY          | -----SLRRC-----                                               | 693 |
| OSTRICH         | -----SLRKC-----                                               | 664 |
| GECKO           | -----SKKCC-----                                               | 702 |
| TURTLE          | -----SYQK-----                                                | 702 |
| ALLIGATOR       | -----TQKKY-----                                               | 662 |
| APLYSIA         | -----SQSPRL---EESMDIGEG-----G-----                            | 696 |
| TRICHOPLAX      | -----TVTKCTINAAA-----                                         | 682 |
| SOFTCORAL       | -----DVSTGCV---DDMETD-----                                    | 699 |
| STONYCORAL      | -----KPDLK---NENLN-----                                       | 708 |
| SEA_ANEMONE     | -----D-----DME-----                                           | 691 |
| SEACUKE         | -----DLDES---RGTMEVD-----PH-----                              | 705 |
| LANCELET        | -----LLSFS---EESMDTEG-----                                    | 712 |
| STARFISH        | -----DLSSQ---EDSMDIDL-----NFS-SS-----                         | 710 |
| SEA_URCHIN      | -----VTFRTEVNEEPEMDVDDD-----SES--IATR-TT-----                 | 717 |

Supplementary Figure 6 CLUSTAL OMEGA ALL PHYLA, EXPANDED

|                 |                                                                |     |
|-----------------|----------------------------------------------------------------|-----|
| PARAMECIUM      | --FFEARQK-QILINLILK--KGL-----IQNHLKS-Y-SGSLQIETINLLITIPVEF     | 699 |
| TETRAHYMENA     | ---KKYIK-KDITSQIKI--FSE-----LYKNLKGK-QDELLIDCLKTMLSIPFEV       | 727 |
| SYLONCHIA       | ---A-KKGEK-QNTYNNMLLT--FKE-----LIGKQEE-Y-ODELLISCLDLLLHVPOI    | 723 |
| APHANOMYCESa    | ---SPLLS-DALASDYAA--VVQ-----VSKAMPO-Y-HDELLINLNVFVVAIPVSM      | 701 |
| APHANOMYCESa    | -----IP-PAVQDEYID--ILG-----VVMAMKAY-SNELLVSTIFVLAATPLSM        | 687 |
| PYTHIUM         | ---DGGSD-VRVRRKYFI--AKR-----VIQGIIFY-KDELLIVASGCVLAAPLGL       | 729 |
| PLASMOPARA      | ---DTTEQ--TRFRNDFTSC-VQQ-----VSSQARFY-ODELLIRISEFVLTAAPLGL     | 730 |
| BREMIA          | ---TTT--RQFRDKFTS--IEQ-----VTAQAQFY-ODELLIRISEFVLTAAPLGL       | 727 |
| AEDDES          | ---QQNFS--MSTTNLLVY--LEL-----QIAKSRNS-TDELLIQLRFRVLGAPVTL      | 714 |
| MIDGE           | ---ATDFDM--TKIEESLSPYIKSM-----LISRCQL--SDELLIQHRLRVFVQVPIDI    | 714 |
| BOMBUS          | ---I-E--TEFLMLNK--IMN-----VLNLIPTP--SDELLITQVHLLIDVPMPLY       | 683 |
| ANT             | ---EKSLES-QQMEELISN--LWH-----SLDLIPG--SDELLINLTYLLDAPFVH       | 702 |
| WHIPWORM        | ---NQVGD--ATCRILLSS--VDE-----IFPRSHS--SDELLISVPTFRVVCVRSAT     | 720 |
| TRICHINELLA     | ---KTENCN-SHYKLLSD--IDH-----VLVESCRR--QDELLVSRFRLLALPTCI       | 718 |
| BEEFLE          | ---ED--ED--TMCYLLTRK--LTS-----LLNKTRQ--TDELLINLQVLLQYPIVI      | 694 |
| BARNACLE        | ---D--SAE--AGLRRLLWAH--VSE-----TAPRCSOY-RDELLIQVNSMVLAAAPAL    | 716 |
| THRIP           | ---ED--LEW--RSTVNLLSA--LYD-----VISRQAOY-RDELLIQVNSMVLAAAPAL    | 680 |
| FLEA            | ---E--E--E--SSCYVLLVNLN--LQE-----CAVNVRMF--NDELLIQVNSMVLAAAPAL | 665 |
| WHITEFLY        | ---T--IEA--ENFRLLVQS--LEL-----VLNRALQY-TDELLIQVNSMVLAAAPAL     | 703 |
| TICK            | ---GEA--VACLRLVSL--LRD-----VLGRLOQY-KDELLISGLVLCGLPLAL         | 700 |
| TERMITE         | ---NQPTQ--KASYSLLCR--LQE-----LLIRLQOY-KNDLVSNLCTVIAAPVAL       | 712 |
| DAPHNIA         | -----QHPRYQS--MTS-----LINRLSQ--SDVLVSNVQAVLSSTPWL              | 665 |
| OSTREOCOCCUS    | -----S--ERVLSLFSQ--LRD-----VLQDTRR--QDELLIQLRFRVLGAPVTL        | 736 |
| STENTOR         | -----SKSTLGLM--LKF-----VFKKQGS--QDELLISGLVLCGLPLAL             | 658 |
| KLEBSORMIDIUM   | FPGVPPGDR--EQCTELFRK--LRE-----VLVAVSR--KDELLISGLVLCGLPLAL      | 805 |
| CLUMBOSS        | -----SHVMIQE--LHE-----VLITSR--KLHLLSGLHCLSCPPTL                | 712 |
| MOSS            | TTGVLEEDR--RLCKELFRK--LQE-----VLVAVSR--KLHLLSGLHCLSCPPTL       | 754 |
| LIVERWORT       | GLPVSEHQ--RLCQQLFRH--LQE-----VLVAVSR--KLHLLSGLHCLSCPPTL        | 771 |
| LIGNANO         | QSVVAMEN--IQCCAMLGS--AAS-----LSARCGOY-RDELLISGLVLCGLPLAL       | 770 |
| COPEPOD         | -----PDTDLFTLLO--LQE-----HLQKSL--DOVELLISGLVLCGLPLAL           | 704 |
| GLOBOSUM        | ---ESSDVT--KAARSLFSK--LDE-----VLLKMQY-KDELLISGLVLCGLPLAL       | 683 |
| PALUSTRIS       | FAEQATSEQ--RRTYILFFNY--IRE-----VLVRLQY-KDELLISGLVLCGLPLAL      | 715 |
| NEOCALLIMASTIX  | INEPYTGIR--QRTYILYTK--INE-----LISRMTOY-KDELLISGLVLCGLPLAL      | 790 |
| GLOMUS          | LSTAASPTQ--RASVFLFK--FDE-----VSARLPOY-KDELLISGLVLCGLPLAL       | 770 |
| LOBOSPOR        | I-----DI--HRAAALFKK--IYE-----VLARLEQY-KDELLISGLVLCGLPLAL       | 746 |
| SYNCEPHALASTRUM | LEPTSRPDL--VVTYLSFRD--LSE-----TRVRLQY-KDELLISGLVLCGLPLAL       | 724 |
| FUNCTIVORUM     | --VTERGKIRKCVLFR--IKE-----VIGRIDQ--KDELLISGLVLCGLPLAL          | 750 |
| HALBUM          | SIPADELENKRNCFKLPK--LKE-----VEAASQY-KDELLISGLVLCGLPLAL         | 836 |
| DUPURPUREUM     | SNNNNPEEDKKNCFILPKK--IKE-----VSNFISH--KDELLISGLVLCGLPLAL       | 822 |
| PVIOLACEUM      | TTTCEEDENKKNCFILPGK--IKE-----VVNVVSH--KDELLISGLVLCGLPLAL       | 797 |
| AMPHIPOD        | ---V--V--AS--RNLGELVVS--ASD-----CCETSQOY-SDELLISGLVLCGLPLAL    | 747 |
| SHRIMP          | ---PEV--ETS--IHLHLSM--VRE-----LLQRCROY-RDELLISGLVLCGLPLAL      | 730 |
| MUDCRAB         | ---PEV--ETL--IHLHLSM--VKD-----VLQRCROY-RDELLISGLVLCGLPLAL      | 728 |
| TARDIGRADE      | ---IPTAAEPSANHVITISF--MRN-----LLGRLOH--SDELLISGLVLCGLPLAL      | 765 |
| HYDRA           | ---DEK--ARLFRMLSA--VKE-----VSARVQOY-KDELLISGLVLCGLPLAL         | 694 |
| SALPINGOBECA    | --AGNMLV--AATLELMSK--GKE-----VMVRSQOY-KDELLISGLVLCGLPLAL       | 741 |
| SPIDER          | ---DPGNLV--PQSYTLFSK--VKE-----TAVOHTQY-RDELLISGLVLCGLPLAL      | 747 |
| LIMULUS         | ---PFQNER--LISFQLFSK--AKD-----AVISLQOY-KDELLISGLVLCGLPLAL      | 738 |
| SCORPION        | ---SEKDC--LIAPFLFAK--SRE-----VVYTLQOY-KDELLISGLVLCGLPLAL       | 739 |
| ROTIFFER        | SSTISEYER--VMCFILFKK--LLE-----VSTRMKOY-KDELLISGLVLCGLPLAL      | 759 |
| CLIONA          | ---WSDHQ--NNVKCIVOK--ATO-----VAARCKOY-KDELLISGLVLCGLPLAL       | 750 |
| OCTOPOUS        | ---SSQTAEK--IACCLIKK--SKE-----LVQLKOY-KDELLISGLVLCGLPLAL       | 731 |
| CAPITELLA       | ---RTSTAQE--EACFMLFTK--AKE-----VMTRLROY-KDELLISGLVLCGLPLAL     | 743 |
| LIMPET          | ---EQEKQK--AVCYLLIKK--SKE-----VLVRMKOY-KDELLISGLVLCGLPLAL      | 726 |
| SCALLOP         | ---IAGTQQR--DSSYLLMKK--SKE-----VLVRMKOY-KDELLISGLVLCGLPLAL     | 757 |
| LINGULA         | ---IGTDR--ETAPFLFSK--TKE-----VLVRMKOY-KDELLISGLVLCGLPLAL       | 745 |
| OYSTER          | ---KADIHQK--ATCFQLIQK--TKE-----VLVRMKOY-KDELLISGLVLCGLPLAL     | 742 |
| SNAIL           | ---IDGQTEK--HLYTILIKK--SEE-----VLVRMKOY-KDELLISGLVLCGLPLAL     | 738 |
| SPONGE          | METEERTDR--QSCYFLFSS--IKE-----VVVMQOY-KDELLISGLVLCGLPLAL       | 751 |
| PRIAPULA        | PDADVDAE1--LNCFTLFSK--SKE-----VLVVKLMY-RDELLISGLVLCGLPLAL      | 759 |
| DANTO           | ---GGTME--NACPSLLAK--GKE-----VCVRMKOY-KDELLISGLVLCGLPLAL       | 754 |
| ESHARK          | ---HTDPEK--YACFALFKK--GKE-----VTRMKOY-KDELLISGLVLCGLPLAL       | 747 |
| BSHARK          | ---PKNPEK--YACFALFKK--GKE-----VTRMKOY-KDELLISGLVLCGLPLAL       | 750 |
| XENOPUS         | ---PEDPER--LSCFALFKK--GKE-----VSSKIROY-KDELLISGLVLCGLPLAL      | 761 |
| STERLET         | ---PEDPEK--YACFALFKK--GKE-----VSSKIROY-KDELLISGLVLCGLPLAL      | 758 |
| GAR             | ---PQDPEK--YACFALFKK--GKE-----VSVRMKOY-KDELLISGLVLCGLPLAL      | 747 |
| HUMAN           | ---PEDPEK--YSCFALFKK--GKE-----VAVKMKOY-KDELLISGLVLCGLPLAL      | 740 |
| PLATYPUS        | ---PEDPEK--YSCFALFKK--GKE-----VAVKMKOY-KDELLISGLVLCGLPLAL      | 742 |
| TASDEVIL        | ---PEDPEK--YSCFALFKK--GKE-----VAVKMKOY-KDELLISGLVLCGLPLAL      | 745 |
| COELACANTH      | ---SLDPEK--YACFALFKK--GKE-----VCARMKOY-KDELLISGLVLCGLPLAL      | 748 |
| CAECILIAN       | ---PKDPER--YACFALFKK--GKE-----VSAKMKOY-KDELLISGLVLCGLPLAL      | 749 |
| CANARY          | ---PEDPEK--SSCFALFKK--GKE-----VAAKMKOY-KDELLISGLVLCGLPLAL      | 739 |
| OSTRICH         | ---PEDPEK--SSCFALFKK--GKE-----VAAKMKOY-KDELLISGLVLCGLPLAL      | 710 |
| GECKO           | ---PEMPEK--SSCFALFKK--GKE-----VTRMKOY-KDELLISGLVLCGLPLAL       | 748 |
| TURTLE          | ---PDDPEK--SSCFALFKK--GKE-----VTRMKOY-KDELLISGLVLCGLPLAL       | 748 |
| ALLIGATOR       | ---PEDPEK--SSCFALFKK--GKE-----VTRMKOY-KDELLISGLVLCGLPLAL       | 708 |
| APLYSIA         | VATGAGQEV--EVTFLHKK--SKE-----VLVRMKOY-RNELLISGLVLCGLPLAL       | 745 |
| TRICHOPLAX      | ---EAESIDK--YLCYLLYK--YKE-----VLVRLKOY-KDELLISGLVLCGLPLAL      | 729 |
| SOFTCORAL       | ---QLDSDC--RNCFILFHK--AME-----VVVRMKOY-KDELLISGLVLCGLPLAL      | 746 |
| STONYCORAL      | LEIVDSDC--MKCFVLFHK--TKE-----VVVRMKOY-KDELLISGLVLCGLPLAL       | 757 |
| SEA ANEMONE     | ---IVDSDC--TNCFILFHK--IKE-----VLKMKOY-KDELLISGLVLCGLPLAL       | 738 |
| SEACUCU         | EPWESGDR--QACFTLFAK--AKE-----VTVRLTOY-KDELLISGLVLCGLPLAL       | 754 |
| LANCELET        | ---RDRPSEG--QACFTLFAK--VKE-----VLVRLKOY-KDELLISGLVLCGLPLAL     | 759 |
| STARFISH        | SSCVSASDR--CICFTLFAK--SKE-----VLVRLKOY-KDELLISGLVLCGLPLAL      | 759 |
| SEA URCHIN      | PSNVSLSDK--QACFTLFAK--SKE-----VLVRLKOY-KDELLISGLVLCGLPLAL      | 766 |

Supplementary Figure 6 CLUSTAL OMEGA ALL PHYLA, EXPANDED

|                 |                                                                                                         |     |
|-----------------|---------------------------------------------------------------------------------------------------------|-----|
| PARAMECIUM      | I>VKDNVLL-L-KSEYIQI I I N F --OMNSN--S I F N S I D L L I Q L I Q S E Y N Q K N Q K N L --               | 751 |
| TETRAHYMENA     | L L I D N Y S --F P R K N L I V A L K K F E L V Q N V --S M C F A M L E C L Q K I K R S -----K N--      | 774 |
| STYLONCYTHIA    | L Y R Q D K R T -D N V Q N W K V I M K R N I D L G R N N N --O L W N S I N M L E Q W F N L L -----P M-- | 771 |
| APHANOMYCESa    | V --D L ----A --I L V P A L K O M L A L G V F H F -D T W A M V E A L E R W R S -----D --                | 738 |
| APHANOMYCESa    | V --D V ----K --M L I P A L K O M L S L G T S H N -D T W A M V S A L E N W H O V Q -----P N--           | 727 |
| PYTHIUM         | V --P L ----V --D I V Q A M V P L L I G K S F L -P A D M V M T C L E R W Q O Q R -----P W--             | 769 |
| PLASMOPOARA     | V --A I ----H --A M V G I V K S M L D L G R S F I -P A M V M T A A L E R W Q O R -----P N--             | 770 |
| BREMLIA         | V --T I ----R --S M V G V K P L E L G R S F L -P A M V M T T L E R W Q I Q R -----P N--                 | 767 |
| AEDDES          | L D S F L ----D S R K D L I E I L C S F O L K G M L -S L O N A M S C V R R L V A E G -----S P I--       | 760 |
| MIDGE           | L I E F A ----D --E F I P I F V I C P N V R S L L -S I M O M T C F D K M L D S L -----S D --            | 756 |
| BOMBUS          | V E N I L ----N --S T I P T F K L P T V G L S D F -E L C R M T L E K W T N H F -----D N E--             | 726 |
| ANT             | V K N L ----P --R T L P F K M P T L S S N L -D L C M T T L E T W T T T T T T H K R N E -----            | 751 |
| WHIPWORM        | A L E K R ----D --L I K K I R N P A L H L T Y L -P I S V G L D A L E K W S E O L -----C D --            | 763 |
| TRICHIANELLA    | V V E K L ----E --S I K E A I K S L K L L N Y L -P I C V M D A L E K W S A E F -----P E D--             | 761 |
| BEEBLE          | I K D M L ----S --T C T P S F R T F H V G R T S T -K L A Y L L E L T L E C W Q N E I -----D P D--       | 737 |
| BARNACLE        | A A D C A ----A --P L L A V A R L L R L G R S H L -P L A R M L D A L E S W L P A L -----A G C--         | 759 |
| THRIP           | A L P L L ----R --V C V P A F O S F O I C S M L -S L A H E L H T L S R W N Q D L -----P G E--           | 723 |
| FLEA            | I P E L L ----V --E A S I S L Q I I F K L G Y N H L -T L A S L A E T L E R W T D H L -----S K E--       | 708 |
| WHITEFLY        | I D P I L ----P --L I S S P L K V F R V G S S Y L -P L A D L M T T L E R W I D A F -----P P E--         | 746 |
| TICK            | V O E H A ----R --A L V P A V R M L O G L S Y L -P L A K S L D A L R L W E Q O L -----P A D--           | 743 |
| TERMITE         | V V P L L ----P --H A V P A F E V I F R V O R S M L -P L A R T G L S A L D K W C Y T L -----P S H--     | 755 |
| DAPHNIA         | V I S L S ----S --S I T G A L A S N K L G L T Y P -P L A E W H D A L E H W Q T T L -----P F --          | 707 |
| OSTREOCOCCLUS   | I --P M ----A --D L I S P L L R E L L Q Y P G M P I G V M D T L E R W I D G K -----H V --               | 778 |
| STENTOR         | V Y S D N I M M L S --L F E P I L Q M T L E L S H L -P L A S H S V L A N W R A S I -----P I --          | 704 |
| KLEBSORIDIUM    | I --E I ----R --Q L V G P O S T I M G L S Y Q -P L D A L D L E G W L K N H -----F R --                  | 845 |
| CLUBMOSS        | I --D L ----A --S I V R P L K L K I L R Y H -P L A N H L D S L Q R W Y N L H -----P K --                | 752 |
| MOSS            | V --G I ----A --S I I P S L R N L K I L R Y P -P L A E V M D S L E R W Q A A F -----P E --              | 794 |
| LIVERWORT       | I --D I ----G --S L V P A M O N F K I L R Y P -P L A S V M D A L E R W H R L Y -----P R --              | 811 |
| LIGNANO         | L A V D R ----P D --D A L A A V R R G L R G R F W P -P L A E A M A A L E R W T A A A -----S S --        | 813 |
| COPEPOD         | V P G L F ----S --L L P D A W N I F K L S S I P -E L A N S M L K S I H G Y L E T F -----P E --          | 746 |
| GLOBOSUM        | T --T I ----E --S L C L P I E S L K M L S F T -P L A S V M D A I A V W S K L -----D R --                | 723 |
| PALUSTRIS       | I --S V ----Q --D T V O P L O I M L R L G L S F P -P L A N I M L T L E R W I A D F -----S A --          | 755 |
| NEOCALLIMASTIX  | I --S L ----N --D F I E P L K I I L L K L G E Y -S L A K L G L D A F E K C I S Y -----I P K--           | 830 |
| GLOMUS          | I --N I ----Q --N L I S P C I T M K M L S Y Q -P L A T T G A I N A E K L V D L Q -----G P Q--           | 811 |
| LOBOSPOR        | I --E P ----S --N I I P P K T A L K L G L G Y P -P L A S T A M E A I E R W V D -----I I D--             | 785 |
| SYNCEPHALASTRUM | I --D I ----Q --Q V V O P L O T F E L L T Y H -P L A T S M D A L D Q T I A P D -----A P T--             | 765 |
| FUNGIIVORUM     | V --P I ----S --Q L I P A M A R F R E L A M Y -P L A K E D T W M K W I S D -----Y E --                  | 790 |
| HALBUM          | V --N I ----P --V L I P T L S T F R L L S Y L -K L S H V E L N T I E Y L S V L -----P E --              | 876 |
| DUPURPUREUM     | I --S I ----P --L L V P I A N L P O Y K S Y L -P L A H I L N A I E Y W I T V V -----P K --              | 862 |
| PVIOLACEUM      | I --N V ----S --Q L V P I V C L A P O Y K S Y L -K L S H V E L N A I E Y W L K V V -----P Q --          | 837 |
| AMPHIPOD        | A R Q I L ----P --Q L S Q P M H T L A M G L S F L -P V L S N V A C L Q R L V D D L -----A F S Q         | 791 |
| SHRIMP          | V O E I F ----P --Q L V S P L O M M L G V S Y L -P L A E V G I L A L Q L W T X S L -----S Q E--         | 773 |
| MUDCRAB         | V I E I F ----P --R L I V P L O M M L H L G V S Y L -P L A E V G I A A L C K W T H L -----P S D--       | 771 |
| TARDIGRADE      | V I D N L ----S --A A M D A I V I D L O A K S Y L -P L A E A N V T L R R W C F D S -----D I --          | 807 |
| HYDRA           | I K E S K ----K --F I I P I F O V M L O L G L S Y Y -E I E L C L D T L D R L Q K K L -----N E --        | 736 |
| SALPINGOEA      | V K R D F ----A --V F F P A V E T M L S L G F Y -P L A D A G L S A L E T W L P P A -----L A --          | 783 |
| SPIDER          | V A K E I ----H --S L I P A L E S N K L G L S Y L -P L A E R V M A L E K W S T N L -----E L --          | 789 |
| LIMULUS         | V L S E I ----S --H L V P S L E C H F O L G L S Y L -P L A T A L E A L E V W S T K L -----P P --        | 780 |
| SCORPION        | V E S E I ----N --L I P A V O M L G L S Y L -P L A M S D A L E T W L Y S L -----P S --                  | 781 |
| ROTIFFER        | V I S I M ----D --H S F I C L N O L L R W N Y L -K L E P A M S L E Y W L K N I -----P T --              | 801 |
| CIONA           | C K D I L ----P --Q L I P A V O R C O L L S Y S -P L A E A M S A L L R W R S I P -----I S --            | 792 |
| OCTOPUS         | I V D Q I ----D --D L L P A I O M S L I S T Y L -P L A N A M D T L E Y W S E T L -----S Q --            | 773 |
| CAPITELLA       | I A L D V ----T --T F V P A L O R S L E I G R S Y L -P L A R T S I N T L E S W S K S L -----P P --      | 785 |
| LIMPET          | I T E O M ----I --D V V P A I O V M T L G L S Y L -P L A G I N D A L E Y W C H N L -----P D --          | 768 |
| SCALLOP         | V A Q O M ----V --E V V P V I Q I L K M L S Y L -P L A K V M L D A L E Y W S D T L -----P A --          | 799 |
| LINGULA         | V I A D L ----P --T I V P A L K I G F K L G L S Y Q -P L A E V G M E A L E F W R D S I -----P N --      | 787 |
| OYSTER          | V S E Q M ----S --S V V P A I O L L S T I G L Y L -P L A M I M L D A L D Y W S D T L -----P A --        | 784 |
| SNAIL           | I A Q O M ----S --K I V P A I O L F S V G L S Y L -P L A E V G L D S L V W W S Q V L -----P P --        | 780 |
| SPONGE          | V V S D F ----K --E L I P A I K I A L R I G M G Y L -P L A K S M E A L E K W T L Y I -----V E S D       | 795 |
| PRIAPULA        | V V D I V ----P --E I V P A V O V M K I G L S Y P -P M O H T L D A L E M W V A N L -----P A --          | 801 |
| DANTO           | V A L D I ----K --A Y P A L O M F R L G L S H A -P L A T A M D A L E S W S S F I -----P A --            | 796 |
| ESHARK          | I E L D I ----K --A Y P A L O M F K L G L S H T -P L A D A L D A L E D W S A H I -----P K --            | 789 |
| BSHARK          | I E L D I ----K --T P I P A L O T F K L L S H I -P L A D A L D A L E H W S T R I -----S K --            | 792 |
| XENOPUS         | I M M D I ----K --A Y P A L O T F K L L S C P -P L A D V G L N A L Q Y W S T N I -----P S --            | 803 |
| STERLET         | V A L D I ----K --A Y P A L O M F K L G L S H T -P L A N T L Y A L E N W S Q F I -----P K --            | 800 |
| GAR             | V A L D I ----K --A Y V P A L O T M K L G L S H T -P L A S A M L D A L E E W S S R I -----S Q --        | 789 |
| HUMAN           | I E L D V ----R --A Y V P A L O M F K L G L S Y T -P L A E V G L N A L E E W S Y I -----D R --          | 782 |
| PLATYPUS        | I M L D I ----K --A Y P A L O M F K L G L S Y P -P L A D V G L N A L E E W S Y I -----P R --            | 784 |
| TASDEVIL        | I E L D I ----K --A Y V P A L O M F K L G L S Y T -P L A E V G L N A L E E W S L Y I -----P K --        | 787 |
| COELACANTH      | V E L D V ----K --A Y P A L O M F K L G L S Y T -P L A D S G L D A L E E W S N R I -----P K --          | 790 |
| CAECILIAN       | I M L D I ----K --A Y P A L O T M F K L G L S Y S -P L A D A G L D A L E D W S A Y I -----P Q --        | 791 |
| CANARY          | I M L D I ----K --A Y P A L O M F K L G L S C T -P M O D L G D A L E D W S A H I -----P R --            | 781 |
| OSTRICH         | I M L D I ----K --A Y P A L O M F K L G L S C I -P M O D L G D A L E D W S A H I -----P K --            | 752 |
| GECKO           | I M L D I ----K --A Y P A L O M F K L G L S Y T -P M O D L D A L E D W S A H I -----P R --              | 790 |
| TURTLE          | I M L D I ----K --A Y P A L O M F K L G L S Y T -P M O D L G D A L E D W S A Y I -----P K --            | 790 |
| ALLIGATOR       | I M L D I ----K --A Y V P A L O M F K L G L S Y T -P M O D V M L A L E D W S S H I -----P K --          | 750 |
| APLYSIA         | I V D O M ----S --S V V P A I O V M T L G L S Y L -P L A E V G L A L E S W F R O L -----P A --          | 787 |
| TRICHOPLAX      | I O D D M ----A --L I I P A I K V S M N I G L S Y L -P L A N A M D A L E R W S S D L -----P Q --        | 771 |
| SOFTCORAL       | V L C D I ----D --I I I P T L K T F K L G L G F L -P L A E A M D A L D T W T A E L -----P S --          | 788 |
| STONYCORAL      | V T L D L ----V --S S V A A K L I F K L G L S Y T -P L A E A G L D A L E S W T T A L -----P A --        | 799 |
| SEA ANEMONE     | V A V D V ----A --A I V P A L E L F K L G L S Y L -P L A Q A G L A A L E E W N A S L -----P G --        | 780 |
| SEACUCU         | V Q Q E V ----N --N L V P A L O M F K L G L S Y L -P L A E A C T S S L Q M W T N N L -----P I --        | 796 |
| LANCELET        | V O S E I ----S --T L V P A L O T F R L G L S Y L -P L A H A G L D A L E R W L N L N -----P R --        | 801 |
| STARFISH        | V O A E V ----A --H L V P A L O M F O L G L S Y L -P L A E T G L E A L E R W M L H L -----L P --        | 801 |
| SEA_URCHIN      | V E N Q V ----H --D V I P A L K T F K L G L S Y L -P L A E S L S A L Q A W I R Y I -----P S --          | 808 |

Supplementary Figure 6 CLUSTAL OMEGA ALL PHYLA, EXPANDED

|                 |                                                              |     |
|-----------------|--------------------------------------------------------------|-----|
| PARAMECIUM      | ----KYLL----KILKNVLPKLSYMQLVPEQEKPFYTP-----                  | 782 |
| TETRAHYMENA     | ----RVVF----KYLKLVIPYLSLITKGELEERIT---S-----D-----           | 805 |
| STYLNCHIA       | ----NVTL----DLYHDILPKLSDFLQVDDNKKOKKLNDAATG-----G-----       | 806 |
| APHANOMYCEsA    | ----TVV----PFYEVLPPLAPVLDEAA-----                            | 759 |
| APHANOMYCEsE    | ----ALK----QFYQELLPLFAPVLISTS-----                           | 747 |
| PYTHIUM         | ----ELD----LVLDQIVPCLTAYFDQSDAVDPEIVVIKGD-----               | 802 |
| PLASMOPARA      | ----ELN----DVICDITPLISAALNQEKLGEREHLKDAT-----                | 803 |
| BREMIA          | ----ELE----DSISDILPLLELVDQEGLSKDELWLMKP-----                 | 799 |
| AEDDES          | ----SSE----NRDRVLVHVLPLLDVLIQTRDVALPPPISRL-----VKF-----Q     | 799 |
| MIDGE           | ----DPK----TREKLLQEVLPCLLESFLSTRDSSGSDKDFQKSL-----KN-----    | 793 |
| BOMBUS          | ----LTA----MFLQEVLPFLPEPLHSGESSVEFLQDIK-----                 | 758 |
| ANT             | ----QTN----ELVRELVVLEPFLRSTESSVEISQDLT-----                  | 783 |
| WHIPWORM        | ----DSE----RQQFYNELAPVLDEYLRCTKFBGRKVVDPPE-----MAGIYKA-----A | 805 |
| TRICHIANELLA    | ----EPO----LDSFYTDLLPIFDDYLRCTKSVDETLLVNNGPNYNGEKSTFFN-----K | 807 |
| BEEBLE          | ----EFE----PFLKQILPLFDSYLSQSKLSMESSSGINDN-----R-----         | 770 |
| BARNACLE        | ----SERWGDCEPLRAMAPALSQLAPEATVAAGG-----                      | 791 |
| THRIP           | ----KMR----ILLKAVLPSFDSLLQTKDSVPVDEDDGNL-----YGM-----T       | 759 |
| FLEA            | ----QNT----ILLDEVLSCLEPVLQSQGLIGDPVKVCL-----ITD-----S        | 744 |
| WHITEFLY        | ----KIN----PFLKEILPCLDSFLRSKDFEGDPEAANGL-----DAE-----F       | 782 |
| TICK            | ----VAD----DVFRQVLPGLCPVLALG-VRAGITEPAES-----TKR-----A       | 778 |
| TERMITE         | ----LVT----PLLMQVLPYLDPLRSQGVASGDVIEK-----E-----L            | 789 |
| DAPHNIA         | ----STFD----SIMEEVLPCLEGLSDVEELAKEVFTFI-----SG-----          | 740 |
| OSTREOCOCCLUS   | ----KRVs----QYLPQILKRLCALDSAAKSDSLFSSNEPE-D-E-----KRSIV      | 819 |
| STERNTOR        | ----KAFB----ELLPKILPALSFLILAKITQEVQGVED-----                 | 737 |
| KLEBSORMIDIUM   | ----ELE----PHLPEVPLNDYLAEDVDSGAGMSGAG-D-EVA---EKR-----       | 885 |
| CLUBMOSS        | ----ELQ----KQLQDINPCLRDYLFVADSRKKTMDSK-----                  | 783 |
| MOSS            | ----QLQ----HWLPOIIPCLNDYLVDEKADVSEPGTSLV-T-EAVGTSAP-----     | 836 |
| LIVERWORT       | ----ELE----IWLPTIVRCLSDYMAEVEITELSDSSSDLT-T-TLE---SSS-----   | 851 |
| LIGNANO         | ----AGL----SDRVAPVLAGLLAVLLSDGGSGAGLTDAAE-EAQRGGADRRS-L      | 858 |
| COPEPOD         | ----SELE----LILEKVLPLNLRVYLSYQHQTSENAELKM-----               | 778 |
| GLOBOSUM        | ----KTLA----SSYAKILPSLNDYLLDLEETASTVSGKA-T-SK-----           | 760 |
| PALUSTRIS       | ----NDLR----PAYKVLPLLADYLVLDVESDQSSSAPRQ-S-LGKKG-----PA      | 797 |
| NEOCALLIMASTIX  | ----DKLK----KYYKDFPLFNRYFINGEERKDAE-LDDYI-S-TNK-----         | 867 |
| GLOMUS          | ----D-IS----KWLEQILPLFNEYLLVADSDVNS-IKEFA-Q-IRNTQRNRGRNF     | 856 |
| LOBOSPOR        | ----HGQE----IWLSQLPVLSDYLMVELTVNGDNLPEAT-S-LKSKQ-----        | 825 |
| SYNCEPHALASTRUM | ----SAML----CPLGSLPVLNEYLMRQELIEEADDSVKRR-K-TFN-V-----       | 804 |
| FUNCTIVORUM     | ----QMK----VHLSALPLMEALYLLINVDTSSQDN-----                    | 821 |
| HALBUM          | ----EVD----AHLVAILPLSDYFLISTNTSSSSNOESAN-S-KTGM-----         | 915 |
| DUPURPUREUM     | ----EVH----SHLDKILPSLNDYLIKISTNGLDSSVNSN-T-Q-DLHLMK-----     | 903 |
| PVIOLACEUM      | ----QVH----NNLHLILPHLNDYLLMSSAAVNSSSGEGSS-T-SISIAFSE---EK    | 881 |
| AMPHIPOD        | DEKYKANIR----GLVQSVPLDILLVQSPOR-ERSELQS---R-VINVKL-----      | 833 |
| SHRIMP          | ----ILS----EHPHVLPLLLPLRSQETGGEAEVHT---R-VITVKM-----         | 810 |
| MUDCRAB         | ----ILH----QHLPAVLPLLLPLRSKET-GEVEVQT---R-VITVKM-----        | 807 |
| TARDIGRADE      | D--RQLLQ----PYFSAILPVLGDYLRSTLTDVTERSKV-----VLGT-----        | 844 |
| HYDRA           | ----SDME----SIVRVLPHFNDYIQPIFKEEDSYTEHV-----TLT-----         | 771 |
| SALPINGOECA     | ----AG----RPPAQLMPLLDKYLAAVAASDIDVEE-----EMKLSR-----         | 730 |
| SPIDER          | ----NILK----PYFPRILPLANSYLLVTAAGSVLSNEKR-----PS-----         | 825 |
| LIMULUS         | ----EVLK----PYTPQILPHLNGYLVGKSTNLDDESAGVPL-----LSRTSS-----   | 820 |
| SCORPION        | ----ELLK----EHYKILPSLNDYFLASDNI SLQPLKNIHT-----FTKQSL-----   | 821 |
| ROTIFFER        | ----QLLK----PYFSLIKFEMFLQASNKSDLDSE---K-VILLML-----          | 840 |
| CLIONA          | ----NR----KCYLDINCLQYFNLSEETNTSTQNTLK---LKP-----             | 826 |
| OCTOPUS         | ----DALK----TVYSQVPLPHLDFIKTSERDSDIDLTL-----                 | 804 |
| CAPITELLA       | ----DVMK----PFYEQLLPYLDAYLTSADAK-NDTLS---L-VQKDP-----        | 821 |
| LIMPET          | ----HIVK----PHYSCLPPLDNYLRTVDK-GMVAFSIF-M-WYISCGM-----       | 807 |
| SCALLOP         | ----SVIQ----PHYSQILPYLDTYKRTADK-GAEVSVSD-G-TVNMTKS-----      | 838 |
| LINGULA         | ----HLLQ----PHYQDILPCLDDYLRKQSEQAGNETNSPS-T-LIMEPKG-----     | 828 |
| OYSTER          | ----SVIR----PFYPQILPCLDSYLRKMDQ-GADDVSEN-T-MEM-NKS-----      | 822 |
| SNAIL           | ----EVLK----PHYANILPCLDSYLRKTVDT-GAEDVSVE-T-LVTVSSS-----     | 819 |
| SPONGE          | K--MDTLQ----CLVNEILPLLADYLRKATSVOLKEEDGGR-----GRQ-----       | 833 |
| PRIAPULA        | ----DVMQ----PYKQILPHLDGILKRTTEGADSVPT-----P-TVAITSA-----     | 838 |
| DANTO           | ----AILQ----PHYTDILPHLDGILKRTSSSEKDDSN---W-EVTFVST-----      | 834 |
| ESHARK          | ----HTIQ----PHYKILPHLDGILKRTAANF-NEAQNN---W-EVMQINN-----     | 826 |
| BHARK           | ----HVIE----PYKQILPHLDGILKRTAAS-NEPESN---W-EMMSMT-----       | 829 |
| XENOPUS         | ----DILK----PYKQILPHLDGILKRTSSTNESLST---L-DMVRI SR-----      | 841 |
| STERLET         | ----YVMQ----PHYKQILPHLDGILKRTASNDDEEQNN---W-EVMSLSR-----     | 838 |
| GAR             | ----PLIQ----PLYRDVLPCLDGYLRTAASNGSDQNT---W-EVMCLSS-----      | 827 |
| HUMAN           | ----HVMQ----PYKQILPHLDGILKRTSALSDETENN---W-EVSALSR-----      | 820 |
| PLATYPUS        | ----HVIQ----PYKQILPHLDGILKRTALSDETENN---W-EVMSLSR-----       | 822 |
| TASDEVIL        | ----HTIQ----PYKQILPHLDGILKRTALSDDNKN---E-EVTVLSR-----        | 825 |
| COELACANTH      | ----WVLQ----PYKQILPHLDGILKRTSISAGDTSS---W-EVRLSR-----        | 828 |
| CAECILIAN       | ----YVIQ----PHYSELPLPYLDGILKRTASSADEYQNS---W-EVMRLSR-----    | 829 |
| CANARY          | ----HMMQ----PYKQVLPPLDGYLKSSTSTVESQNN---W-EVRKLSQ-----       | 819 |
| OSTRICH         | ----HIMQ----PYKQVLPPLDGYLKSSTSTVESQNN---W-EVRKLSR-----       | 790 |
| GECKO           | ----YTMQ----PYKQILPHLDGILKRTSSTVESQNN---W-EVKLSQ-----        | 828 |
| TURTLE          | ----HIMQ----PYKQILPHLDGILKRTSSTVESQNN---W-EVRKLSR-----       | 828 |
| ALLIGATOR       | ----NIMQ----PYKQVLPPLDGYLKRTASPFEPQNN---W-EVKLSQ-----        | 788 |
| APLYSIA         | ----SVLE----AHYTSILPYLDYLRDLDLGAEDVVK---E-TTVVSA-----        | 825 |
| TRICHOPLAX      | ----NLIQ----PYFSDILPCFDDYLRKSSADDTTETLVEDSS---KALK-----      | 809 |
| SOFTCORAL       | ----ELLH----PYLREVLPLDGYLKTASELETSEKETKL-R-S-----            | 824 |
| STONYCORAL      | ----DKLK----PFLREILPCLDGYLRTLGDQLHNE---CN-T-IVLITSS-----     | 838 |
| SEA ANEMONE     | ----DVLK----RHLRNILPYLDGYLKSATDAVEEQDQVSR-R-TATLRST-----     | 822 |
| SEACUCU         | ----DTLT----KPLKRVLPPLDGYLRARSSEDAAPN---QF-V-EM-KGTL-----    | 834 |
| LANCELET        | ----SALE----PHFPILPYLDSYLRQTAADTSSSSSD-GF-Q-TVSLTAA-----     | 842 |
| STARFISH        | ----DSLQ----PHLKVILPLDGYLRGTITQGSADAVVQT-V-TMASASS-----      | 843 |
| SEA_URCHIN      | ----DVLK----PYAQLPQLDGYLGAGSGSEDEGS---RP-E-VLVIQTA-----      | 847 |

Supplementary Figure 6 CLUSTAL OMEGA ALL PHYLA, EXPANDED

|                 |                                                              |     |
|-----------------|--------------------------------------------------------------|-----|
| PARAMECIUM      | -----IQYIDS-----ISPNIL-----LSESHIDQNHIVDKVRYFLSIIGGLCH       | 821 |
| TETRAHYMENA     | -----MKYKQSNQQRDIPNLT-----VSELGQRKDLIRVTWNLLADIGGESH         | 850 |
| STYLONCHEIA     | -----DTYQYL-----EMLKS-----GNEVNIERKDIALKVMDDLKIGGNAH         | 844 |
| APHANOMYCEsA    | -----NQSAFQIIVLRLLSLGGYSR                                    | 781 |
| APHANOMYCEsE    | -----NEGLTVQLKLLKILSMGGYSR                                   | 769 |
| PYTHIUM         | -----ASDGGNS-----ESANATERSKLRORIMVLKMGGYGA                   | 836 |
| PLASMOPARA      | -----LQGVKAT-----GSDEASDLAQQVORRLLLLRCDGNIL                  | 837 |
| BREMIA          | -----RGTDTV-----NTDEISNFTQORRLLLLNCGGNIS                     | 832 |
| AEDES           | RKRSVHL--TS--SKIEKIKQLA-----LEASESDLVKLQLRILVFLADLDPNVC      | 846 |
| MIDGE           | -----S-----FII-----QTTIETDLTRFKKRLLLTRFPDNDV                 | 824 |
| BOMBUS          | -----TERKVIKRII-----LRDDENTLERFQMRVLLFISLDTNII               | 795 |
| ANT             | -----TNK-RVKRID-----VIDTCTIQNRORVLLFLSLDMDLL                 | 819 |
| WHIPWORM        | QLKGVRR--S--KQVQVQLQTKI-----DASGETAQRVLRRAVFSVSHGHVDS        | 851 |
| TRICHINELLA     | KLQTVNS--DS--ENVLVKADDND-----SEEMPNSQVSLRIRASVFSVSLGCYMN     | 854 |
| BEEBLE          | -----R--KSSQALKKRV-----LLDTEPELLRLTKMKIFVQVNSLLC             | 809 |
| BARNACLE        | -----DRAP-----SSRRPSELTPLRRRALQLLLAAAG-                      | 821 |
| THRIP           | MVKTV--LQE--QKKKLLWYKV-----NSHSDTEVLKQKVVVFLTLDSVVC          | 805 |
| FLEA            | -----RSQKVKKQI-----IEGTPSELALQORLITFIKLSSMDC                 | 781 |
| WHITEFLY        | KVLTSL-----RKSRRKIKKI-----HERQDTELFRIQRILMLKIDISTA           | 826 |
| TICK            | RSQGRHK-VSL-KL-LYQKRDQ-----IKVP--ETESRLRDLVLCFLGLQGHRR       | 823 |
| TERMITE         | MVLGRNRTNY--SQNKVARKKI-----IEHPESELSQHQHETISFLQDSTTC         | 838 |
| DAPHNIA         | -----KRFKRRKPN-----IQSTEERESWEKIRRRVRLIRMGPKCS               | 778 |
| OSTREOCOCCUS    | IWGGKRRKQL-----AG-KTEE-----QEDVVLKRAFLRITKTHIIMGGGACH        | 862 |
| STENTOR         | -----QLARQKKNLAIYRIVKFLSLGGACH                               | 763 |
| KLBSORMIDIUM    | -----NTADMTRTQA-----RRQREARAK-----DMQAFPELQORFLRIGCHSH       | 930 |
| CLUBMOSS        | -----TLKLEKE-----KTKVVTPELQVVRQVFLQIYGAYH                    | 817 |
| MOSS            | -TISMSRSGQL--AQIKRARAK-----DSQSPPELQVVRQVFLCIGGLGH           | 881 |
| LIVERWORT       | -SRESLSRLQL--ARLKKTRAQ-----ASQAGPELTOIRIQKFLQIGGFNH          | 896 |
| LIGNANO         | ARQSVARALRSIEARRARAKNYA--AGGAELGLAEMQKRVLLFLSAQSSFK          | 909 |
| COPEPOD         | ---RRRAPVVKTRRNKLESEGIA--K--NYEEENC--QLALGILKVVSSKLR         | 823 |
| GLOBOSUM        | ---ART--K--HLKTHKHNEQM-----DEQIVQDLKSQIRILKLLSLGQDSR         | 803 |
| PALUSTRIS       | SS-QRASA--A--NTRAKAALATI-----DETTNQLRATRYRIVLQIMIGDNR        | 844 |
| NEOCALLIMASTIX  | -----M--KTMKKINKYEKE-----IVEETNNNKIKVRLILMIGDGIP             | 905 |
| GLOMUS          | KSLDQTKERV--KSGQKKSQYTVVG-----IGQLERNVGLHDLQVVRVRLIRLGGVSK   | 910 |
| LOBOSPOR        | -----K--GSARQSQSYKVVARSASIPNLPQVQESMRDLQLRILRLLRRAQYNK       | 873 |
| SYNCEPHALASTRUM | -----A--AAKNFQWRWTLN-----ESQTSQVSVLRLQLRFLRSLAGASK           | 847 |
| FUNCTIVORUM     | -----MGRGAAPR-----MNTKSIDFVD-----PKLQAQRTVVEEQTIRVIRLKLGGQNY | 962 |
| HALBUM          | ---ETWSRHRK---MKYKSYSNID-----PKLQPKTSTIEDLQNRILRILKLGDNII    | 950 |
| PVIOLACEUM      | LSVGGFNKXK---KF-KSNSID-----PKLQPKTSTVEDIQNRILRILKLGDNIS      | 928 |
| AMPHIPOD        | SLLNQRRRVDV---RMR---D---AR-CSKVSPSIDLERVVLKLLSLGPDVC         | 877 |
| SHRIMP          | AFARQRRKVDQ---KMK---E---SK-RVEETAMQKIQMLTLRILSLDPLLR         | 854 |
| MUDCRAB         | AYANQRRKVDQ---KKIL---A---SK-QVDATAMKRVQSLILQLIGLDPPLG        | 851 |
| TARDIGRADE      | GKGRKRRSPV-----AV-GTDQVALTRVRETLSPDLGGKYN                    | 883 |
| HYDRA           | KSERKVVVPI---RYLKAL-AMS---QK-DLSESPFLNLELRVIFKFLCGLGRLS      | 819 |
| SALPINGOECA     | SITRKRREAAV-----VA-VSDSNPFAALKMRILRILMAMGGQHN                | 858 |
| SPIDER          | -KKAYKMSVKS---MKRSNKNSTSS---DN-SLEDPALGRILQLILKYLQJGE-NN     | 872 |
| LIMULUS         | -KNKFAKSPA---NFKKVNKDN---QS-KVQETETVLRILRILKFLSLGGKNN        | 868 |
| SCORPION        | -V---VRKXLP---LKSQPKKIK---QT-DLHESELIVQHRILRFLSLGQIN         | 866 |
| ROTIFFER        | HKGRKRLPV---KLFDKSSL-----NFDVYEQKQKILKILQLSADMS              | 883 |
| CIONA           | KSRSPAQK---LMS---LK-ELDEPARKKARNQVIRFLSMGCSDD                | 865 |
| OCTOPUS         | NIDQKRR-----YF---L---DPDSELKIKYRIAKYLINIGGFN                 | 840 |
| CAPITELLA       | MKQGGKKIPV---KLLKQTM-FD---AE-KGKESELKEIQRCVLLSLGGSIN         | 869 |
| LIMPET          | H---IRFSLF---SSFSSFTINCLL---YF-QSYESKLGVIDRVOVLLSLGGSIN      | 856 |
| SCALLOP         | KTGRGRKLAV---RMVRGPKDQ---LK-KGYESELQVLRVMRYLGLGGSQN          | 887 |
| LINGULA         | HSYGRKGLPI---KLLKPAV-----A-KEESSQLELLKQVIFKFLNLGGATN         | 873 |
| OYSTER          | KSGKGRKLPV---RILKGP-KD---SK-QVFTQLAKRVQRMVTLRILGGEVN         | 870 |
| SNAIL           | KSKYGRKLPV---RLVKERPVD---LD-KGYESQLSVVQKIVTYLTLGGSMN         | 868 |
| SPONGE          | YATKRYAR--M---KMVE-KWSEG---LH-QGSRDDITSVRRRILLLSLGGVNV       | 879 |
| PRILAPULA       | NATRGKRRIPV---KLLQSGKRM-----AEDSALTARMRVIRFLGLGGMAN          | 884 |
| DANTO           | GSSKGYGVLL---RLLKSKRFS---L---GDESPIAAVRRVRLHLGGQLN           | 881 |
| ESHARK          | PSRKGSKVLP---HHFKSKFEL---V---SEDSATVARRVLLSLGQIN             | 873 |
| BSHARK          | -SSKGNKVLII---RRLKNARDLS---M---SEETPAAVKRVVRLSLGQIN          | 875 |
| XENOPUS         | SLHKGFNKQLI---QQLKRMKTLs---V---KEESSLTAVRRVRLSLGQIN          | 888 |
| STERLET         | STEKYGRVLM---RLLKAKRFS---L---TEDSPTALVRRVRLHLGGQIN           | 885 |
| GAR             | GAEKYGVRVL---RLLKRTKHLs---M---AEDSPSAVRRVRLHLGGQLN           | 874 |
| HUMAN           | AAQGFNKNVVI---KHLKTKNLS---S---NEAISLEEIRIVQMLSLGQIN          | 867 |
| PLATYPUS        | ATQGFNKNVVV---RHLKAKATA---P---VEDLSLESVRRVRLSLGQIN           | 869 |
| TASDEVIL        | AAQGFNKNVVI---KHLKSKTIL---S---DAEMSLEAVRQVIRVLSLGGQIN        | 872 |
| COELACANTH      | ASQKGDHVLII---RLLKAKAVS---L---NEDSSLGAVRGRVRLSLGGQIN         | 875 |
| CAECILIAN       | AAQGFNKNVVI---QRLKRTKTLs---L---DQDVSLASTRNRVQVLLSLGGQIN      | 876 |
| CANARY          | AAQGFNKNVVI---QRLKRTKTLs---V---DNPSLQAVRTRVARLLSLGGQIN       | 866 |
| OSTRICH         | AAQGFNKNVVI---QHLKRAKTLs---L---VGDPSLEAVRTRVARLLSLGGQIN      | 836 |
| GECKO           | AVQKGNKVVII---QRLKAKSLA---L---EDHSLEAVRTRVARLLSLGGQIN        | 875 |
| TURTLE          | AAQGFNKNVVI---QRLKAKTLs---L---EDHSLEAVRTRVARLLSLGGQIN        | 875 |
| ALLIGATOR       | AVQKGNKVVII---QRLKAKALS---L---NEDLSLEAVRTRVARLLSLGGQIN       | 835 |
| APLYSIA         | KKSSRRSKAPI---RLKNAQSD---DK---GSKSLSQVQKRLVFLSLGGQIN         | 873 |
| TRICHOPLAX      | ARTGKAKLPV---KVVNP-----TG-GSKDSPLAQVRLRIVQLRILGGNTN          | 853 |
| SOFTCORAL       | -RKSQTK-----ASKSKRN---PN-EEENSPLNVRHRIILLTLGGKCN             | 867 |
| STONYCORAL      | HHTSRGRKLP---KLLKMKP-QS---QH-QMTLTPAKVRHKLRFMFLGGGETN        | 886 |
| SEA_ANEMONE     | YSRLGKILSLY---YIDFVSKRNI---LP-QVGESLVTIRVILRLLQLGGHTN        | 871 |
| SEAUCUE         | GSGAGRRIPV---KLLKTSGGAG---KV-GATTSPLRDIQHLQLLGLGGKTN         | 883 |
| LANCELET        | SSTRGRRIPV---KLLKAAAERN---Q---VQESDLVKARLIRVFLSLGGHTN        | 889 |
| STARFISH        | SGRAGRRLPA---KLIKGASTTG---Q---TQDSPLRSVQLRILHLSLGGQTN        | 890 |
| SEA_URCHIN      | SSRVGRRRIPS---KLLKAKDND---Q---SQDSPLRSVQLRILHLSLGGSVN        | 894 |

Supplementary Figure 6 CLUSTAL OMEGA ALL PHYLA, EXPANDED

|                 |                                                                       |      |
|-----------------|-----------------------------------------------------------------------|------|
| PARAMECIUM      | LIVDETY-----NESLLALDY--NSP <b>TT</b> INIP-- <b>V</b> GQRK---MK        | 853  |
| TETRAHYMENA     | LIVLSEKGFQGNVERQLLSEFENLQISKGVSLISWDY--EAKVLPFLP-- <b>L</b> LAKK---ID | 904  |
| STYLNCHIA       | SIIISNEQNKL-----IERENFIKWDP--EKRLKFTVP-- <b>L</b> YTKK---VD           | 881  |
| APHANOMYCESa    | FVVQEHAA-----RDDV---DKM--AAALTFPVA--LDRVH---AD                        | 813  |
| APHANOMYCESa    | YVVQEEDPQ-----LQI--SAPLDISLA--MENVH---VE                              | 797  |
| PYTHIUM         | LLASRGANT-----AD--AKRGFQ--TSTLQQLPI--LNDIT---ID                       | 869  |
| PLASMOPARA      | LLVSEPPSL-----ITASGIVGGIF--SPHFRLELR--LSETP---LS                      | 873  |
| BREMIA          | LLMSEPPSV-----INSNSMIKMS--SPYFRLELR--LGEVS---AS                       | 868  |
| AEDES           | TKMILRSETDDA--A-----QQTADLEKPLVLDLSDNRNLSLQLSVIGIR---PI               | 893  |
| MIDGE           | KFILSKFDQKLV--R-----DH-----VANVFRIRLRC <b>D</b> PLI---PN              | 857  |
| BOMBUS          | MDFIYK--SM-----NTGATWOK--KDLLKYSLL--PSDTQ---AD                        | 828  |
| ANT             | TSVHERA--SR-----STGASWH--KDLLKXKLP--LPAAR---LN                        | 853  |
| WHIPWORM        | KALLQVNSRMVK-----QVLRWTT--DRLLNFPCC--FPDVK---ID                       | 887  |
| TRICHINELLA     | RFLIDSA---DV-----GSLLRWGQ--GSHLEFICB--FDMK---FE                       | 887  |
| BEEBLE          | EALAVSE--DN-----ADLTVMAN--EQHLKIDL--YEDVK---LQ                        | 842  |
| BARNACLE        | --LVADS--SE-----AELVAWSR--RPLVGLDVP--FSDVK---PK                       | 852  |
| THRIP           | LSLLDGSE--DR-----VGVTAWQK--ERLLKFPMP--FDMK---VD                       | 839  |
| FLA             | SSLISKNISNHY-----DHLIPWDL--KQHLRFRLP--QGVK---PL                       | 817  |
| WHITEFLY        | LTILSEDS-----TRSKWKS--TKQLKFTIP--FPDCR---LN                           | 857  |
| TICK            | ALLLADLERDTL-----KAALAWDPETKEHLVFPALP--FPDTR---VE                     | 861  |
| TERMITE         | LALLKDPQ--QE-----EDVIPWATCLOQLVFPPLP--FKDMK---LN                      | 874  |
| DAPHNIA         | RLVAQNE-----DHVIARSATGWQI--KGHLEFGLP--LSDMK---PI                      | 814  |
| OSTREOCOCCUS    | GLLEDMKP-----SKLDLPWDR--NCKLPTPI--LVRSS---TN                          | 895  |
| STENTOR         | YLVA-----QWLEHLAWDS--QPLRMKIR--ENLKY---LE                             | 795  |
| KLEBSORMIDIUM   | LLVPDNL-----TKDQOSALAWD--KDLKFLP--FDEK---PD                           | 967  |
| CLUBMOSS        | FLVPDANL-----LQSSGTGGLSMDV--VDRIKFTVP--LREK---LD                      | 854  |
| MOSS            | FLVPEVDL-----LQLTGTGGLAWDP--IDRVKFLP--FRQDK---PD                      | 918  |
| LIVERWORT       | HLVPELNL-----LQLAGTGGLAWDS--VDRLOFTIP--FREK---YD                      | 933  |
| LIGNANO         | YQLAEIAS-----DKAATADLAASP--GGRLLYFDLP--FADSK---PR                     | 947  |
| COPEPOD         | YLSLPT-----KEEIGRAAVVWDQ--QKHLVEV--LRDVN---LP                         | 858  |
| GLOBOSUM        | LMLSN-----ETSASLLAWDT--EMNLKQVQP--FKEAI---FD                          | 835  |
| PALUSTRIS       | FLLEE-----GRGSQQLAWDT--EKRVFMDP--FKEIN---CR                           | 877  |
| NEOCALLIMASTIX  | YLYSN-----FDIKDYKWDP--ENGITFILH--FVDFQ---TE                           | 937  |
| GLOMUS          | FLFEDIVNNDLV--YRP IPTMNPAGSKMSNNKLLAWDP--EKRVSNIP--FPDTR---VE         | 962  |
| LOBOSPOR        | LILAQRTADEV D--K-----RNTSDLLAWDP--ETRLKRLP--FLEMK---AE                | 913  |
| SYNCEPHALASTRUM | LMIQTPHLQNKD--ERT-----KALGTYDKMLAWDP--ARPLKVRMA--FQAT---ID            | 893  |
| FUNGIVORUM      | YMTSD-----HDMKGLAWD--FKVRFPLP--FPDVK---VD                             | 877  |
| HALBUM          | HLMGSVNL-----MAPCTESGVAWDT--ISRLOQIIP--LGLDN---GVS                    | 1000 |
| DPURPUREUM      | HFLGVEVL-----LAPGTESGVAWDT--EQXLIKIP--FTDQTASAI E                     | 990  |
| PVIOLACEUM      | FFLGDVNL-----LASGTETGVAWDT--EQKLSFEFF--FIDQKA---N                     | 965  |
| AMPHIPOD        | SALSSETGVSAN--T-----SSEPGIAVEDTGRWDE--CDHVALKIP--YEHST---LD           | 923  |
| SHRIMP          | LHTIPQ-----DPDTIASAAVRWNV--QKLVKFATP--FEHIK---ID                      | 890  |
| MUDCRAB         | QYVIPQ-----DADSLAAAVCWDS--KQHIRFAMP--FGQAK---ID                       | 887  |
| TARDIGRADE      | HLIVDGF-----LNDVKNLALAWDM--VQHLQFSVP--FDDMM---LKS                     | 921  |
| HYDRA           | IGILO-----NAAKFSKHVWDT--NQHLFPALP--FRDMK---PT                         | 853  |
| SALPINGOEA      | HELAALHQGAG--G-----GSDVGEGETPPVWADM--TNHLKFAVP--FOEMK---PE            | 904  |
| SPIDER          | VALLE--QS-----HQKVDEVAIAWDPLCKRNHLKYSVP--FVDMK---PN                   | 910  |
| LIMULUS         | KALLE--KS-----EKEISEKAI SWDNRVQDHLKFAVP--FDMK---PE                    | 906  |
| SCORPION        | FAMLS--AD-----KIKTHEVAVWIDNKQHLKFPILP--FIDVK---LE                     | 904  |
| ROTIFFER        | HSVHL--ID-----NEDTISWDT--VQHLKFPV--FDIK---PT                          | 915  |
| CIONA           | HGDLN-----EDAGLAVAPWDE--DVNIQYPIP--FRDLK---PC                         | 898  |
| OCTOPIUS        | KDLLA--NS-----DQDVLKHAVAWDT--KKHLKFDLP--FDMK---PT                     | 876  |
| CAPITELLA       | HALVF--GO-----TAN--PPDLVWDS--DQHLKFDLP--FLDIK---TS                    | 904  |
| LIMPET          | YTLT--NS-----ODDISKQALAWDT--EQHLRFETP--FIDMK---PI                     | 892  |
| SCALLOP         | HAMLA--DN-----EAEVSRQALAWDT--HRHLKFDMP--FIDMK---PT                    | 923  |
| LINGULA         | AAMVQ--CT-----SEDIKAVAWDQ--EKHLKFDMP--FMDVK---AA                      | 909  |
| OYSTER          | HALLS--G-----SDVCEEALAWDA--EQHLRFDPV--FMDMK---PQ                      | 904  |
| SNAIL           | FALLA--RR-----EEEISRRALAWDT--EQHLRFDPV--FMDMK---PS                    | 904  |
| SPONGE          | ESLSKVPS-----QHSLSVWDS--DRRLGFAVP--FSDLK---PE                         | 912  |
| PRIAPULA        | ISLIS--CD-----AEDIAKAVAWDA--EKHLKGFVP--FDMK---PV                      | 920  |
| DANTIO          | RSLVTAVS-----AEDMMKRFVAWDC--EKRLSFAVP--FDMK---PV                      | 918  |
| ESHARK          | RSLVTAVS-----AEEMMKCIAWDT--EKRLSFAVP--FDMK---PI                       | 910  |
| BHARK           | RSLVAATS-----SEEMMKCVAWVA--ERPLSFAVP--FDMK---PV                       | 912  |
| XENOPUS         | RSLVTAAS-----TEEMIKRHVSWDT--EKRLRFDPV--FKDLK---PV                     | 925  |
| STERLET         | RSLVTATS-----AEEMMKKFVWDS--EKRLFAVP--FDMK---PV                        | 922  |
| GAR             | RSLVTAAS-----AEEMMKKFVWDS--EKRLFAVP--FDMK---PV                        | 911  |
| <b>HUMAN</b>    | KNLLTVTS-----SDEMMSKYVADR--EKRLSFAVP--FREM--PV                        | 904  |
| PLATYPUS        | RNIVTAAS-----ADEMMKKCVAWDT--EKRLSFAVP--FAEMK---PV                     | 906  |
| TASDEVIL        | RNLVTAAS-----SDEIMKKCLAWDS--EKRLSFAVP--FAEMK---PV                     | 909  |
| COELACANTH      | RSLVTAAS-----SEEMMKFVSWDT--EKRLSFAVP--FDMK---PV                       | 912  |
| CAECILIAN       | QSLVTASC-----AEEMMKKYVSWDT--EKRLSFAVP--FVDMK---PI                     | 913  |
| CANARY          | HNLITATS-----AEEMMKCVSWDT--EKHLKFAVP--FDMK---PV                       | 903  |
| OSTRICH         | HNLITATS-----AEEMMKCVSWDT--EKRLSFAVP--FDMK---PV                       | 873  |
| GECKO           | RNLVTAAS-----AEEMMKFVSWDT--EKHLKFAVP--FDMK---PV                       | 912  |
| TURTLE          | RNLITAS-----TEEMMKFVSWDT--EKHLKFAVP--FDMK---PV                        | 912  |
| ALLIGATOR       | RSLVTAAS-----EEMMKKFVSWDS--EKHLNFAVP--FVDMK---PV                      | 872  |
| APLYSIA         | HTLQD--RA-----DADISNEAVWDS--QKHLRFDPV--FDMK---PV                      | 909  |
| TRICHOPLAX      | SLVIR--KG-----NDDGSSQAVAWDN--HKRLPFAIP--FDMK---PI                     | 889  |
| SOFTCORAL       | LGLLEG--G-----EGSVASSGLAWDT--KQHLKFAVP--FDMK---PT                     | 903  |
| STONYCORAL      | ILLLDN-----TGINSNNAVWDT--ENHLTFAPV--FDMK---PS                         | 921  |
| SEA ANEMONE     | LCLLG--SD-----GGVDSGSVAVAWDT--VKHLKFAVP--FDMK---PT                    | 907  |
| SEACUKE         | ISLLE--SS-----SEELAEMAVAWDT--QKHLKFAVP--FDMK---PT                     | 919  |
| LANCELET        | ACLVTGLT-----AEDLAKRAVAWDT--QKHLKFAVP--FDMK---PT                      | 926  |
| STARFISH        | AYLLE--TS-----AEEIAKAVAWDT--QPLRFAPV--FVDMK---PN                      | 926  |
| SEA_URCHIN      | VGLLE--TS-----AQELSNVALAWDS--QPLRFAPV--FVDMK---PE                     | 930  |

Supplementary Figure 6 CLUSTAL OMEGA ALL PHYLA, EXPANDED

|                 |                                                           |      |
|-----------------|-----------------------------------------------------------|------|
| PARAMECIUM      | LRFRQFLERLSTLQLSAPLEKSKLYVLLIQFAIYMIHQDQAVNCTKAVAQ-----NT | 906  |
| TETRAHYMENA     | INLKLIPRMVLELNPPD-KIKVYVCAIHAIIIVMIQTQASSIQGGKRRGRDMENLI  | 963  |
| STYLONCNCHIA    | IYFDACLPRVVDLAKNSSDRETRVAACEFLHALLIYMIKKNASAPKGRGNQQQQ    | 935  |
| APHANOMYCEsa    | MSIEILLRMRDLNVTSIDRVPKAAACEAYHBMVLYLCKMTATLPTAK--THAS     | 865  |
| APHANOMYCESe    | IPISNILLHMKDLDLNTSIDRGIKSAACEYHBMVLYLCKMTATLPRSK--SSAN    | 849  |
| PYTHIUM         | LPLMKIFDIYGSLLCDSTDRRVKGAECYHBMASVLYLCKMTATNPHT----AG     | 918  |
| PLASMOPARA      | LALDSVLSHGLNLSQSSVSRVKSACEYHBMICYLCKMTATHPHT----SG        | 922  |
| BREMIA          | LAMNELSHLGTLLCKSSNRRLKVSACEYHBMALVCLCKMTATTHPHT----AG     | 917  |
| AEDDES          | TKLDTIIRVCAIDVNGSSDRKTVAACEFLHALLIYVIGIQYD-----           | 937  |
| MIDGE           | TFDNLTERVQDLNLSSEKRTTKVAACEFLHALLIYVIGIQYD-----           | 902  |
| BOMBUS          | THFDKILPRILLDQNSGDRKTVAACEFLHALLIYVIGIQYD-----            | 875  |
| ANT             | THFDMLPRILLDQNSGDRKTVAACEFLHALLIYVIGIQYD-----             | 902  |
| WHIPWORM        | LCDDFLPHLDDLNSAIERPLKVAACEFLHALLIYVIGIQYD-----            | 936  |
| TRICHINELLA     | LALDTLIPRLCDLNSAGDRPLKVAACEFLHALLIYVIGIQYD-----           | 936  |
| BEEFLE          | VYLDKILPRIVNVLNNSDRKTVAACEFLHALLIYVIGIQYD-----            | 891  |
| BARNACLE        | LWLETFLPRIVQLNLGSGDAQRTVAACEFLHALLIYVIGIQYD-----          | 901  |
| THRIP           | ISLDDLLPRIVHLNVCSDRKTVAACEFLHALLIYVIGIQYD-----            | 888  |
| FLEA            | IYLDKILPRINKLWLDNDRQTKVAACEFLHALLIYVIGIQYD-----           | 865  |
| WHITELY         | IYLDKILPRIVESHLSNDRQTKVAACEFLHALLIYVIGIQYD-----           | 906  |
| TICK            | IYLDKILPRIVESHLSNDRQTKVAACEFLHALLIYVIGIQYD-----           | 910  |
| TERMITE         | INLEKILPRIVESHLSNDRQTKVAACEFLHALLIYVIGIQYD-----           | 923  |
| DAPHNIA         | TQLDQFLPRIVESHLSNDRQTKVAACEFLHALLIYVIGIQYD-----           | 863  |
| OSTREOCOCCLUS   | LWLDLILPRIVESHLSNDRQTKVAACEFLHALLIYVIGIQYD-----           | 949  |
| STERNOR         | EDFKLILPRIVESHLSNDRQTKVAACEFLHALLIYVIGIQYD-----           | 838  |
| KLEBSORIDIUM    | IYLDKILPRIVESHLSNDRQTKVAACEFLHALLIYVIGIQYD-----           | 1021 |
| CLUBMOSS        | IYLDKILPRIVESHLSNDRQTKVAACEFLHALLIYVIGIQYD-----           | 908  |
| MOSS            | IYLDKILPRIVESHLSNDRQTKVAACEFLHALLIYVIGIQYD-----           | 972  |
| LIVERWORT       | IYLDKILPRIVESHLSNDRQTKVAACEFLHALLIYVIGIQYD-----           | 987  |
| LIGNANO         | IYLDKILPRIVESHLSNDRQTKVAACEFLHALLIYVIGIQYD-----           | 996  |
| COPEPOD         | IYLDKILPRIVESHLSNDRQTKVAACEFLHALLIYVIGIQYD-----           | 907  |
| GLOBOSUM        | IYLDKILPRIVESHLSNDRQTKVAACEFLHALLIYVIGIQYD-----           | 883  |
| PALUSTRIS       | IYLDKILPRIVESHLSNDRQTKVAACEFLHALLIYVIGIQYD-----           | 931  |
| NEOCALLIMASTIX  | INLDNLLPRIVESHLSNDRQTKVAACEFLHALLIYVIGIQYD-----           | 990  |
| GLOMUS          | ILFDEFLPRIVESHLSNDRQTKVAACEFLHALLIYVIGIQYD-----           | 1010 |
| LOBOSPOR        | IYLDKILPRIVESHLSNDRQTKVAACEFLHALLIYVIGIQYD-----           | 964  |
| SYNCEPHALASTRUM | ISFDEFLPRIVESHLSNDRQTKVAACEFLHALLIYVIGIQYD-----           | 944  |
| FUNGIIVORUM     | IYLDKILPRIVESHLSNDRQTKVAACEFLHALLIYVIGIQYD-----           | 925  |
| HALBUM          | IYLDKILPRIVESHLSNDRQTKVAACEFLHALLIYVIGIQYD-----           | 1042 |
| DUPURPUREUM     | IYLDKILPRIVESHLSNDRQTKVAACEFLHALLIYVIGIQYD-----           | 1034 |
| PVIOLACEUM      | IYLDKILPRIVESHLSNDRQTKVAACEFLHALLIYVIGIQYD-----           | 1011 |
| AMPHIPOD        | IYLDKILPRIVESHLSNDRQTKVAACEFLHALLIYVIGIQYD-----           | 966  |
| SHRIMP          | IYLDKILPRIVESHLSNDRQTKVAACEFLHALLIYVIGIQYD-----           | 939  |
| MUDCRAB         | IYLDKILPRIVESHLSNDRQTKVAACEFLHALLIYVIGIQYD-----           | 936  |
| TARDIGRADE      | IYLDKILPRIVESHLSNDRQTKVAACEFLHALLIYVIGIQYD-----           | 970  |
| HYDRA           | IYLDKILPRIVESHLSNDRQTKVAACEFLHALLIYVIGIQYD-----           | 903  |
| SALPINGOBECA    | VOLDPMLPRIVESHLSNDRQTKVAACEFLHALLIYVIGIQYD-----           | 953  |
| SPIDER          | IYLDKILPRIVESHLSNDRQTKVAACEFLHALLIYVIGIQYD-----           | 959  |
| LIMULUS         | IYLDKILPRIVESHLSNDRQTKVAACEFLHALLIYVIGIQYD-----           | 955  |
| SCORPION        | IYLDKILPRIVESHLSNDRQTKVAACEFLHALLIYVIGIQYD-----           | 953  |
| ROTIIFER        | IYLDKILPRIVESHLSNDRQTKVAACEFLHALLIYVIGIQYD-----           | 964  |
| CIONA           | IYLDKILPRIVESHLSNDRQTKVAACEFLHALLIYVIGIQYD-----           | 947  |
| OCTOPLUS        | IYLDKILPRIVESHLSNDRQTKVAACEFLHALLIYVIGIQYD-----           | 927  |
| CAPITELLA       | IYFDAPLPRIVESHLSNDRQTKVAACEFLHALLIYVIGIQYD-----           | 951  |
| LIMPET          | IYFDAPLPRIVESHLSNDRQTKVAACEFLHALLIYVIGIQYD-----           | 941  |
| SCALLOP         | IYLDKILPRIVESHLSNDRQTKVAACEFLHALLIYVIGIQYD-----           | 972  |
| LINGULA         | IYLDKILPRIVESHLSNDRQTKVAACEFLHALLIYVIGIQYD-----           | 958  |
| OYSTER          | IYFDAPLPRIVESHLSNDRQTKVAACEFLHALLIYVIGIQYD-----           | 951  |
| SNAIL           | IYFDAPLPRIVESHLSNDRQTKVAACEFLHALLIYVIGIQYD-----           | 953  |
| SPONGE          | IYLDKILPRIVESHLSNDRQTKVAACEFLHALLIYVIGIQYD-----           | 960  |
| PRIAPULA        | IYFDVFLPRIVESHLSNDRQTKVAACEFLHALLIYVIGIQYD-----           | 969  |
| DANTIO          | IYLDKILPRIVESHLSNDRQTKVAACEFLHALLIYVIGIQYD-----           | 967  |
| ESHARK          | IYLDKILPRIVESHLSNDRQTKVAACEFLHALLIYVIGIQYD-----           | 958  |
| BHARK           | IYLDKILPRIVESHLSNDRQTKVAACEFLHALLIYVIGIQYD-----           | 960  |
| XENOPUS         | IYLDKILPRIVESHLSNDRQTKVAACEFLHALLIYVIGIQYD-----           | 975  |
| STERLET         | IYLDKILPRIVESHLSNDRQTKVAACEFLHALLIYVIGIQYD-----           | 971  |
| GAR             | IYLDKILPRIVESHLSNDRQTKVAACEFLHALLIYVIGIQYD-----           | 960  |
| HUMAN           | IYLDKILPRIVESHLSNDRQTKVAACEFLHALLIYVIGIQYD-----           | 953  |
| PLATYPUS        | IYLDKILPRIVESHLSNDRQTKVAACEFLHALLIYVIGIQYD-----           | 955  |
| TASDEVIL        | IYLDKILPRIVESHLSNDRQTKVAACEFLHALLIYVIGIQYD-----           | 958  |
| COELACANTH      | IYLDKILPRIVESHLSNDRQTKVAACEFLHALLIYVIGIQYD-----           | 961  |
| CAECILIAN       | IYLDKILPRIVESHLSNDRQTKVAACEFLHALLIYVIGIQYD-----           | 962  |
| CANARY          | IYLDKILPRIVESHLSNDRQTKVAACEFLHALLIYVIGIQYD-----           | 952  |
| OSTRICH         | IYLDKILPRIVESHLSNDRQTKVAACEFLHALLIYVIGIQYD-----           | 922  |
| GECKO           | IYLDKILPRIVESHLSNDRQTKVAACEFLHALLIYVIGIQYD-----           | 961  |
| TURTLE          | IYLDKILPRIVESHLSNDRQTKVAACEFLHALLIYVIGIQYD-----           | 961  |
| ALLIGATOR       | IYLDKILPRIVESHLSNDRQTKVAACEFLHALLIYVIGIQYD-----           | 921  |
| APLYSIA         | IYFDKILPRIVESHLSNDRQTKVAACEFLHALLIYVIGIQYD-----           | 958  |
| TRICHOPLAX      | IYLDKILPRIVESHLSNDRQTKVAACEFLHALLIYVIGIQYD-----           | 938  |
| SOFTCORAL       | IYLDKILPRIVESHLSNDRQTKVAACEFLHALLIYVIGIQYD-----           | 951  |
| STONYCORAL      | IYLDKILPRIVESHLSNDRQTKVAACEFLHALLIYVIGIQYD-----           | 969  |
| SEA_ANEMONE     | IYLDKILPRIVESHLSNDRQTKVAACEFLHALLIYVIGIQYD-----           | 956  |
| SEAUCUE         | IYLDKILPRIVESHLSNDRQTKVAACEFLHALLIYVIGIQYD-----           | 968  |
| LANCELET        | IYLDKILPRIVESHLSNDRQTKVAACEFLHALLIYVIGIQYD-----           | 975  |
| STARFISH        | IYLDKILPRIVESHLSNDRQTKVAACEFLHALLIYVIGIQYD-----           | 975  |
| SEA_URCHIN      | IYLDKILPRIVESHLSNDRQTKVAACEFLHALLIYVIGIQYD-----           | 979  |

Supplementary Figure 6 CLUSTAL OMEGA ALL PHYLA, EXPANDED

|                 |                                                           |      |
|-----------------|-----------------------------------------------------------|------|
| PARAMECIUM      | KKKFEYANIYKMMVPMIFISNMLHPCRFVYKEHLTRIVHWFNISKOYE-----     | 956  |
| TETRAHYMENA     | KSKEPFSKIYKSLPTIFSIGSSHPSCLMNQLLILISRNFSNKSQLE-----       | 1013 |
| STYLONCCHIA     | -EVAPFAKIYKLLPVMHILATVBNISROLTEPLIFIVLRVFNSTVYD-----      | 984  |
| APHANOMYCESa    | -EKSVYDFHWGHTPSSLVQLAADTITRSLAPLALALLRWFSGIAALY-----      | 914  |
| APHANOMYCESa    | -EKSIYDHWANVTPSLVMLASDADTITRSLAPLALLRWFSGISSMY-----       | 898  |
| PYTHIUM         | -SKSAYFEVWASVSRLLILATDAEKVCRALTEPLLFQVITVFKSGSEFY-----    | 967  |
| PLASMOPARA      | -TKTFDFYLWREVFARVVRLASDEKICRSLTEPLLFOLLRLAINSDTY-----     | 971  |
| BREMIA          | -KKTFEYEMWREVLKRVMLATDPEKICRSLTEPLLFOLLRLAINSGSFP-----    | 966  |
| AEDDES          | ---KMTKLWTKCDHLIQLATDTDIACVCMTEPLLFOLIIHVLQPSKIG-----     | 983  |
| MIDGE           | ---ETPLLWKEICKRNLVILATDQDQTVARLLEPLLMMMHVPQPSQIL-----     | 948  |
| BOMBUS          | -NPDFQVSLYTMCCPALLNLGCDYBEAARHTIPVLMQLTRHWSKFMLE-----     | 924  |
| ANT             | -NRDKPTLYSTLCKAVWTLGCSSEVVCLEHPLALLMHWSSRRMP-----         | 951  |
| WHIPWORM        | -EKDSIAAMYGGKLLPALLQLTSPTEVPRRLSSLFGIVHLKPTTFAS-----      | 985  |
| TRICHINELLA     | -DRESISKAYSHLPVLLKLACDVEVPKMMSTLFVLIHLHSGTDFAN-----       | 985  |
| BEEFLE          | -SD--LDELLKXHVSLLRLCGMDQOVVELRPLCPFLIHWVHPFQSR-----       | 938  |
| BARNACLE        | -GS--LSAVYRRLPALLRLAASPVLVARLAPLLTITHWTTDAMSG-----        | 948  |
| THRIP           | -GH--LTSLVWHLPKFISLACDVIDIVSOLFKPLGELAHWVSSKLNK-----      | 935  |
| FLEA            | ----LVHLYNTIPPTLLQLAADSDIIMQLFDPLMIQITHWFSQWKI-----       | 910  |
| WHITEFLY        | -NQ--TADVLKEMLPALLQLGSDSDVVRRLQHLVRFMMFVSSKFOAH-----      | 953  |
| TICK            | -AKFPMVHLFKHLPPELLHLACDVOVTRLRPLVQLLHWVSSGSTRG-----       | 959  |
| TERMITE         | -DKY--SELFRKLSLPLKLGCDPDPAPAIHRLNLVLIQLVHWVSSKFKLK-----   | 970  |
| DAPHNIA         | -LRYPLAPLAKIPTITLNLAAASDEIIRLRALLIQLVHWVSRPAFYRKGSSGPRTVL | 922  |
| OSTREOCOCCUS    | -TESQYRPFPEKLEPIIFELAVDTEPVARLNSLSFPIVRRVARKQAQE-----     | 998  |
| STENTOR         | -LDFNFKLYNNVFPVYKLTATVVELLRMMEPSSKGLVRRVRSFSFE-----       | 887  |
| KLEBSORMIDIUM   | -FEYQFKYRKLPAKLLKATDVEPVTRLSSEFVGLIHWVSSRRTPE-----        | 1070 |
| CLUBMOSS        | -L-GNYVQLYRKLPSVYLWLATDVEPVTRLSSEFAMGLIHWVSSNTQKE-----    | 956  |
| MOSS            | -S-VHFDKIYKRLPAILRLATDVELVTRLLDFVKLIHWVTSNOOKE-----       | 1020 |
| LIVERWORT       | -S-VYLDKIYKRLPAVLR LAVDVOVTRLNEFVKLIHWVTSNLOKE-----       | 1035 |
| LIGNANO         | -DREQLLWRRLLPALLPLAAEDPVVKLQPLLMQLVHWVSRSEFE-----         | 1045 |
| COPEPOD         | -KKFPMTLEFRVFPVILKLCSDPSVIOQLFQPLFSOMIHWVTKERKCG-----     | 956  |
| GLOBOSUM        | -GRTPYHKLYKLPVLLRLSVDLKVTRLEPRLVLIQLVHWVTKNSKYE-----      | 932  |
| PALUSTRIS       | -KKSPPHNLKRVPGLLRLAVDLKVTRLEPRLVLIQLVHWVTKNSKAE-----      | 980  |
| NEOCALLIMASTIX  | -NTNIFNKPLYLFPVILRLSVIDIKISRLPSSLTFOLIHWVTSNLSND-----     | 1039 |
| GLOMUS          | -SQSPFYRYRKLPAKLLRLAIDTPVPRRLRRLVAGLIHWVTSNNAQE-----      | 1059 |
| LOBOSPOR        | -KKSPPHKLFLKLPALLRLAVDVOVPRLRPLVLSLIHWVTSNNAQE-----       | 1013 |
| SYNCEPHALASTRUM | -TRSPYHRTYRVFPVLLRLAVDLSTPRMRSVLPFLIHWVTSNNAQE-----       | 993  |
| FUNCTIVORUM     | ---DHSYRKYDHLPAKLLRLASDVEPVTRLEPLTMGLIHWVTRNLAE-----      | 973  |
| HALBUM          | ---GGSFRLYRRLPALLRLAVDHWVARLSPILMLVHWVTRNVAE-----         | 1090 |
| DUPURPUREUM     | ---SISFSRLYRKLPSLLCLSTDVEPVTRLQPLVPLIHWVTRNKKQE-----      | 1082 |
| PVIOLACEUM      | ---EVSFSRLYKXLPGLLKLSTDVEPVTRLQPLVPLIHWVTRNKKQE-----      | 1059 |
| AMPHIPOD        | -ATRSPAPYRHLPAACLRLACDVOVTRLLEPLTMGLIHWVTSNNGYE-----      | 1015 |
| SHRIMP          | -LKEPMAPLYRHLPSAMRLACDVOVTRLLEPLTMGLIHWVTSNNGYE-----      | 988  |
| MUDCRAB         | -AKYPMALYRHLPSAMRLACDVOVTRLLEPLTMGLIHWVTSNNGYE-----       | 985  |
| TARDIGRADE      | -EKAILMDLINKLPKILLELACDVEPVTRLEPLSVOMVHWVSRTAQTA-----     | 1019 |
| HYDRA           | -QKLSMERLYKLPALIKLSCGQOVSEQLSPPLFLIHWVTRGSKYE-----        | 952  |
| SALPINGOBECA    | -GEDNLSPLYRHLPAVLRACDVOVTRLSPVLMGLIHWVTSNNSH-TE-----      | 1001 |
| SPIDER          | -EKYSMEALYKLPGLLELSCDVOVTRLSPVLMGLIHWVTSNCKVSS-----       | 1008 |
| LIMULUS         | -KYPMTKLYRQVFPALLRLACDVOVTRLEPLTMGLIHWVTRNNGLM-----       | 1004 |
| SCORPION        | -AIYSMKKLYRHLPAKLLRLACDVEPVTRLEPLTMGLIHWVTRNNGLM-----     | 1002 |
| ROTFIFER        | -QSYQMKLYRHLPSGLCLSTDVEPVTRLQPLVPLIHWVTRNNGYE-----        | 1013 |
| CIONA           | -SPHSMALYKXLPVLLQLACDVOVCKLFDPLIKMHWVTRNKKQE-----         | 996  |
| OCTOPOUS        | -YCFSEALYKXLPVLLQLACDVOVCKLFDPLIKMHWVTRNKKQE-----         | 976  |
| CAPITTELLA      | ---NPMALYRKLPOMLKATDVOVSRLEPELMLIHWVTSNNSH-----           | 998  |
| LIMPET          | -KRYPMQLYKXLPAMKRLACDVOVAKLFEPLTMGLIHWVTRNNGYE-----       | 990  |
| SCALLOP         | -KRCSMAPLYKXLPVLLQLACDVEVAKLFEPLTMGLIHWVTRNNGYE-----      | 1021 |
| LINGULA         | -GRHPLDGLYRHLPAKLLRLACDVEVAKLFEPLTMGLIHWVTRNNGYE-----     | 1007 |
| OYSTER          | -ERYSMAPLYKXLPVLLQLACDVEVAKLFEPLTMGLIHWVTRNNGYE-----      | 1000 |
| SNAIL           | -KRNPMDSLYRKLPAKLLRLACDVOVTRLEPLVLMGLIHWVTRNNGYE-----     | 1002 |
| SPONGE          | ---KNPMTKLYKLPVALQLACDVOVTRLEPLVLMGLIHWVTRNNGYE-----      | 1008 |
| PRIAPULA        | -SKRPMALYKXLPVLLRLACDVOVTRLEPLVLMGLIHWVTRNNGYE-----       | 1018 |
| DANTIO          | -SAPPMTKLYRQVFPALLRLACDVOVTRLEPLVLMGLIHWVTRNNGYE-----     | 1016 |
| ESHARK          | ---QFTLYKLNQQLPVLLRLACDVOVTRLEPELVLIIHWVTRNNGYE-----      | 1006 |
| BHARK           | ---QFTMYKLNHRLPVLLRLACDVOVTRLEPELVLIIHWVTRNNGYE-----      | 1008 |
| XENOPUS         | -GSSPMYKLYKXLPVLLRLACDVOVTRLEPELVLIIHWVTRNNGYE-----       | 1024 |
| STERLET         | -STPPMYKLYKXLPVLLRLACDVOVTRLEPELVLIIHWVTRNNGYE-----       | 1020 |
| GAR             | -SSPMTKLYKXLPVLLRLACDVOVTRLEPELVLIIHWVTRNNGYE-----        | 1009 |
| HUMAN           | -GAPPMYKLYKXLPVLLRLACDVOVTRLEPELVLIIHWVTRNNGYE-----       | 1002 |
| PLATYPUS        | -GSPPMYKLYKXLPVLLRLACDVOVTRLEPELVLIIHWVTRNNGYE-----       | 1004 |
| TASDEVIL        | -GPPPMYKLYKXLPVLLRLACDVOVTRLEPELVLIIHWVTRNNGYE-----       | 1007 |
| COELACANTH      | -GVPMTKLYKXLPVLLRLACDVOVTRLEPELVLIIHWVTRNNGYE-----        | 1010 |
| CAECILIAN       | -SLPPMYKLYKXLPVLLRLACDVOVTRLEPELVLIIHWVTRNNGYE-----       | 1011 |
| CANARY          | -GPPPMYKLYKXLPVLLRLACDVOVTRLEPELVLIIHWVTRNNGYE-----       | 1001 |
| OSTRICH         | -GPPPMYKLYKXLPVLLRLACDVOVTRLEPELVLIIHWVTRNNGYE-----       | 971  |
| GECKO           | -VSQPMSHLYKXLPVLLRLACDVOVTRLEPELVLIIHWVTRNNGYE-----       | 1010 |
| TURTLE          | -GSPPMYKLYKXLPVLLRLACDVOVTRLEPELVLIIHWVTRNNGYE-----       | 1010 |
| ALLIGATOR       | -GSSPMYKLYKXLPVLLRLACDVOVTRLEPELVLIIHWVTRNNGYE-----       | 970  |
| APLYSIA         | -NKYPMERLYRKLPPALFALACDVOVCKLFEPLVLMGLIHWVTSNKMSE-----    | 1007 |
| TRICHOPLAX      | -SVTNYGNLYKXLPAILTLASDVOVSOQLQPLVLYLIHWVTSNKNYE-----      | 987  |
| SOFTCORAL       | -SKSPLKLYKXLPVLLQLACDVOVSOQLRPLFLIHWVTSNKNYE-----         | 1000 |
| STONYCORAL      | -KKSPEMLKXLPVLLQLACDVOVSOQLRPLFLIHWVTSNKNYE-----          | 1018 |
| SEA ANEMONE     | -VALPMQNLYKXLPVLLQLACDVOVSOQLRPLFLIHWVTSNKNYE-----        | 1005 |
| SEAUCUKE        | -SQSMVNLKXLPQALLHLACDVOVAKLFEPLVLMGLIHWVTSNKNYE-----      | 1017 |
| LANCELET        | -AKNPMTRLYKXLPVLLQLACDVOVAKLFEPLVLMGLIHWVTSNKNYE-----     | 1024 |
| STARFISH        | -AKSPMQHLYRRLPALFRLACDVOVAKLFEPLVLMGLIHWVTSNKNYE-----     | 1024 |
| SEA_URCHIN      | -AKSPMQHLYKXLPVLLQLACDVOVAKLFEPLVLMGLIHWVTSNKNYE-----     | 1028 |

Supplementary Figure 6 CLUSTAL OMEGA ALL PHYLA, EXPANDED

|                 |                                                              |      |
|-----------------|--------------------------------------------------------------|------|
| PARAMECIUM      | APDVAQLLCLFQPIN-KED--PILPFCQLIGFPIQHLKQTPP---DQLKL---        | 1005 |
| TETRAHYMENA     | SPEVAELLLNIMNFISS-KDN--MLRELANCLGQPIKHLKQNTPE---QBIVK---     | 1062 |
| STYLONCCHIA     | HPEVESLLBALIDGASS-RNN--SQRDLCSNAVAEPAKSLKQMTD---KNIKE---     | 1033 |
| APHANOMYCEsA    | PFEAHAFLLDAMHGLSC-VDDGS--GVRDVAQSVATFLKSLKQPPPT---SR-AN---   | 964  |
| APHANOMYCEsE    | PFEAQIFLDSLDIGISS-ADD--GGAREVQALSLSTFLKSLKQPPGS---           | 942  |
| PYTHIUM         | PHEYSRMLDELVLIGLSD-RTN--DVRVREYKCLAAACLSSEHAGL-----          | 1010 |
| PLASMOPARA      | PFEYSMLDELTRMSD-S-E--DVRVREYKCLAAACLSSEHAGL-----             | 1013 |
| BREMIA          | PFEYAGVWDLVSNFSD-P-E--DVRVREYKCLAAACLSSEHAGL-----            | 1005 |
| AEDDES          | LKGTETVLVCLMESISH-QTD--GVRDVAQSVATFLKSLKQPPPT---SR-AN---     | 1036 |
| MIDGE           | SSLTIVVILVEMEMISY-KKS--SGVDDSRLLREFILAVMRTNRRQOAS---         | 998  |
| BOMBUS          | SLTTTYFLDLDFKGLCC-EAN--SRLREPSICLSEFLKSLKQSDN---AAI---       | 971  |
| ANT             | ---SPVILDLFDGILTD-DSN--DVRVREYKCLAAACLSSEHAGL-----           | 992  |
| WHIPWORM        | EATNVLVLLVLIIDNLCN-TTS--SSVRAQSLAYTEFLVSHMTPASRKE---ATH---   | 1035 |
| TRICHINELLA     | KMVTSCILLDTMDGLCC-FWN--SSLRDLSNYYISEYCRSHRXXVDSGGQ---NMR---  | 1035 |
| BEEFLE          | SGHEALVIBALLESMTN-PTD--PALRDFAKCLISEFVKHLKQSNK---LSK---      | 987  |
| BARNACLE        | RPESALLDVLLEGLVD-AGD--PARRDVSNADALREYLOSLKORRA-DP---V---     | 995  |
| THRIP           | SEQADAFLLDAILDGLTTH-QTD--MLRDYSMTCLHEFVVKSLKQGNM-M-----      | 980  |
| FLEA            | SIETSLLDLDMIGLISN-ETS--ASVRDISAKYLINEFVKSLKROADP-ED---LRS--- | 959  |
| WHITEFLY        | TNSVKVVFALMDGITN-PTD--SARVDFMRECIKGTQCAIKOSKS--S---NEK---    | 1001 |
| TICK            | SRESVAIVCELDWTVQ-PQE--TIVLKDFAKCLREPVQGIKOSTP-KE---LEK---    | 1008 |
| TERMITE         | SKEVELIITLMDGITN-PTD--PALRDFAKCLHEFVVKSLKQGNM-M-----         | 1014 |
| DAPHNIA         | GAEAALIVVEMESACRGLDA--SLVRDVAQSVATFLKSLKQPPPT---SR-AN---     | 972  |
| OSTREOCOCCLUS   | LDVTICLIFDAVLTGSSNSKA--GVRDVAQSVATFLKSLKQPPPT---SR-AN---     | 1048 |
| STENTOR         | NPETMALLDAILDGLVD-EDN--GVRDVAQSVATFLKSLKQPPPT---SR-AN---     | 931  |
| KLEBSORIDIUM    | HPETMALLDAILDGLVD-EDN--GVRDVAQSVATFLKSLKQPPPT---SR-AN---     | 1117 |
| CLUBMOSS        | NPETMALLDAILDGLVD-AEN--GVRDVAQSVATFLKSLKQPPPT---SR-AN---     | 1003 |
| MOSS            | NPETMALLDAILDGLVD-PDN--GVRDVAQSVATFLKSLKQPPPT---SR-AN---     | 1067 |
| LIVERWORT       | NPETMALLDAILDGLVD-AEN--GVRDVAQSVATFLKSLKQPPPT---SR-AN---     | 1082 |
| LIGNANO         | GPYTALLDLSLDFRITASSGD--ASVRDVAQSVATFLKSLKQPPPT---SR-AN---    | 1094 |
| COPEPOD         | SLETNCLLVKLLDVTCE-DED--VSRDVAQSVATFLKSLKQPPPT---SR-AN---     | 1002 |
| GLOBOSUM        | NPETMALLDAILDGLVD-EDN--GVRDVAQSVATFLKSLKQPPPT---SR-AN---     | 980  |
| PALUSTRIS       | NAETMALLDAILDGLVD-EDN--GVRDVAQSVATFLKSLKQPPPT---SR-AN---     | 1028 |
| NEOCALLIMASTIX  | DSESLIILDCCFSAIIC-QD--GVRDVAQSVATFLKSLKQPPPT---SR-AN---      | 1085 |
| GLOMUS          | NQETMALLDAILDGLVD-EDN--GVRDVAQSVATFLKSLKQPPPT---SR-AN---     | 1107 |
| LOBOSPOR        | NPETIVILLDAILDGLVD-EDN--GVRDVAQSVATFLKSLKQPPPT---SR-AN---    | 1060 |
| SYNCEPHALASTRUM | NPETIALLDAILDGLVD-EDN--GVRDVAQSVATFLKSLKQPPPT---SR-AN---     | 1040 |
| FUNCTIVORUM     | SEPTMALLDAILDGLVD-EDN--GVRDVAQSVATFLKSLKQPPPT---SR-AN---     | 1021 |
| HALBUM          | NDETMAILLDAILDGLVD-EDN--GVRDVAQSVATFLKSLKQPPPT---SR-AN---    | 1142 |
| DUPURPUREUM     | NDDTMNLLDAILDGLVD-EDN--GVRDVAQSVATFLKSLKQPPPT---SR-AN---     | 1131 |
| PVIOLACEUM      | SDDTMNLLDAILDGLVD-EDN--GVRDVAQSVATFLKSLKQPPPT---SR-AN---     | 1108 |
| AMPHIPOD        | HPDTVALLDAILDGLVD-EDN--GVRDVAQSVATFLKSLKQPPPT---SR-AN---     | 1068 |
| SHRIMP          | NVDTMALLDAILDGLVD-EDN--GVRDVAQSVATFLKSLKQPPPT---SR-AN---     | 1033 |
| MUDCRAB         | NPDTMALLDAILDGLVD-EDN--GVRDVAQSVATFLKSLKQPPPT---SR-AN---     | 1030 |
| TARDIGRADE      | SAEATAVLDCVMDGLVS-EGN--GVRDVAQSVATFLKSLKQPPPT---SR-AN---     | 1068 |
| HYDRA           | SPETIVLLDAILDGLVD-EDN--GVRDVAQSVATFLKSLKQPPPT---SR-AN---     | 1001 |
| SALPINGOECA     | REEVVLLDAILDGLVD-EDN--GVRDVAQSVATFLKSLKQPPPT---SR-AN---      | 961  |
| SPIDER          | TPESAIVLLDAILDGLVD-EDN--GVRDVAQSVATFLKSLKQPPPT---SR-AN---    | 1055 |
| LIMULUS         | SEETMALLDAILDGLVD-EDN--GVRDVAQSVATFLKSLKQPPPT---SR-AN---     | 1053 |
| SCORPION        | SDETMALLDAILDGLVD-EDN--GVRDVAQSVATFLKSLKQPPPT---SR-AN---     | 1051 |
| ROTIFFER        | SSDTMALLDAILDGLVD-EDN--GVRDVAQSVATFLKSLKQPPPT---SR-AN---     | 1062 |
| CLIONA          | SKDTMALLDAILDGLVD-EDN--GVRDVAQSVATFLKSLKQPPPT---SR-AN---     | 1044 |
| OCTOPOUS        | NAESMALLDAILDGLVD-EDN--GVRDVAQSVATFLKSLKQPPPT---SR-AN---     | 1022 |
| CAPITELLA       | RPDTEALLDAILDGLVD-EDN--GVRDVAQSVATFLKSLKQPPPT---SR-AN---     | 1047 |
| LIMPET          | SSETMALLDAILDGLVD-EDN--GVRDVAQSVATFLKSLKQPPPT---SR-AN---     | 1039 |
| SCALLOP         | SVETMALLDAILDGLVD-EDN--GVRDVAQSVATFLKSLKQPPPT---SR-AN---     | 1069 |
| LINGULA         | NPETAALLDAILDGLVD-EDN--GVRDVAQSVATFLKSLKQPPPT---SR-AN---     | 1056 |
| OYSTER          | SEESMALLDAILDGLVD-EDN--GVRDVAQSVATFLKSLKQPPPT---SR-AN---     | 1047 |
| SNAIL           | SPESMALLDAILDGLVD-EDN--GVRDVAQSVATFLKSLKQPPPT---SR-AN---     | 1051 |
| SPONGE          | SPDTVLLDAILDGLVD-EDN--GVRDVAQSVATFLKSLKQPPPT---SR-AN---      | 1057 |
| PRIAPULA        | SPETMALLDAILDGLVD-EDN--GVRDVAQSVATFLKSLKQPPPT---SR-AN---     | 1067 |
| DANTO           | SQDTVALLDAILDGLVD-EDN--GVRDVAQSVATFLKSLKQPPPT---SR-AN---     | 1065 |
| ESHARK          | SRTDVALLDAILDGLVD-EDN--GVRDVAQSVATFLKSLKQPPPT---SR-AN---     | 1055 |
| BSHARK          | SRTDVALLDAILDGLVD-EDN--GVRDVAQSVATFLKSLKQPPPT---SR-AN---     | 1057 |
| XENOPUS         | SQDTVALLDAILDGLVD-EDN--GVRDVAQSVATFLKSLKQPPPT---SR-AN---     | 1073 |
| STERLET         | SQDTVALLDAILDGLVD-EDN--GVRDVAQSVATFLKSLKQPPPT---SR-AN---     | 1069 |
| GAR             | SQDTVALLDAILDGLVD-EDN--GVRDVAQSVATFLKSLKQPPPT---SR-AN---     | 1058 |
| HUMAN           | SQDTVALLDAILDGLVD-EDN--GVRDVAQSVATFLKSLKQPPPT---SR-AN---     | 1051 |
| PLATYPUS        | SQDTVALLDAILDGLVD-EDN--GVRDVAQSVATFLKSLKQPPPT---SR-AN---     | 1053 |
| TASDEVIL        | SQDTMALLDAILDGLVD-EDN--GVRDVAQSVATFLKSLKQPPPT---SR-AN---     | 1056 |
| COELACANTH      | SQDTVALLDAILDGLVD-EDN--GVRDVAQSVATFLKSLKQPPPT---SR-AN---     | 1059 |
| CAECILIAN       | SQDTVALLDAILDGLVD-EDN--GVRDVAQSVATFLKSLKQPPPT---SR-AN---     | 1060 |
| CANARY          | SQDTVALLDAILDGLVD-EDN--GVRDVAQSVATFLKSLKQPPPT---SR-AN---     | 1050 |
| OSTRICH         | SQDTVALLDAILDGLVD-EDN--GVRDVAQSVATFLKSLKQPPPT---SR-AN---     | 1020 |
| GECKO           | SQDTVALLDAILDGLVD-EDN--GVRDVAQSVATFLKSLKQPPPT---SR-AN---     | 1059 |
| TURTLE          | SQDTVALLDAILDGLVD-EDN--GVRDVAQSVATFLKSLKQPPPT---SR-AN---     | 1059 |
| ALLIGATOR       | SQDTVALLDAILDGLVD-EDN--GVRDVAQSVATFLKSLKQPPPT---SR-AN---     | 1019 |
| APLYSIA         | SPETMALLDAILDGLVD-EDN--GVRDVAQSVATFLKSLKQPPPT---SR-AN---     | 1056 |
| TRICHOPLAX      | SVETIALLDAILDGLVD-EDN--GVRDVAQSVATFLKSLKQPPPT---SR-AN---     | 1036 |
| SOFTCORAL       | SPDTIILLDAILDGLVD-EDN--GVRDVAQSVATFLKSLKQPPPT---SR-AN---     | 1049 |
| STONYCORAL      | TPETMALLDAILDGLVD-EDN--GVRDVAQSVATFLKSLKQPPPT---SR-AN---     | 1067 |
| SEA_ANEMONE     | SPETIALLDAILDGLVD-EDN--GVRDVAQSVATFLKSLKQPPPT---SR-AN---     | 1054 |
| SEACUCLE        | SEETMALLDAILDGLVD-EDN--GVRDVAQSVATFLKSLKQPPPT---SR-AN---     | 1066 |
| LANCELET        | SEETITLLDAILDGLVD-EDN--GVRDVAQSVATFLKSLKQPPPT---SR-AN---     | 1073 |
| STARFISH        | SEETIALLDAILDGLVD-EDN--GVRDVAQSVATFLKSLKQPPPT---SR-AN---     | 1073 |
| SEA_URCHIN      | SDETSTLLDAILDGLVD-EDN--GVRDVAQSVATFLKSLKQPPPT---SR-AN---     | 1077 |

Supplementary Figure 6 CLUSTAL OMEGA ALL PHYLA, EXPANDED

|                 |                                                                  |      |
|-----------------|------------------------------------------------------------------|------|
| PARAMECIUM      | -----NYSNIKTVMRRITTYANHPDFRYKSLLECIL-QVVKHTOKFK-FIVSKYFIE        | 1056 |
| TETRAHYMENA     | -----NHSNIKSALRRILISFSGPDLSKRFKALLALK-EVNNVNIKHS-FVLDKPFIME      | 1113 |
| STYLONCCHIA     | -----NPNNIKSLRRISISNHPDPFKRLSSVLCFS-KIFSVIRRH-PLIDRPFME          | 1084 |
| APHANOMYCESa    | -----TVPSAHALMERLALCGHLLSCRVAALAIN-HMYRDFRED-DLVRTYALS           | 1015 |
| APHANOMYCESa    | -----TSFSAHTLFRRLALSSHPVRSRGLGIMLVN-QFYRDFREDQ-EMVDIYALS         | 993  |
| PYTHIUM         | -----SVTKAEVLFHRLALCRHPGAERIGAAITME-YFLRSLNEENSAVIFSAFALR        | 1062 |
| PLASMOPARA      | -----PQIKAHYIFNRVSLCRHPGSVQRSGAAVSI-EYFLQSLREDEGALTRFAMP         | 1065 |
| BREMIA          | -----NCKRTDGFKRRLSLCRHPGAMQRSAAISIE-CFLRSLREDEGKTTSQCALS         | 1056 |
| AEDDES          | -----SSANLSVLEKRLRTFSLDINPNRRLGAAIAFN-NIYRILREED-AQIERCWFDF      | 1087 |
| MIDGE           | -----PIKLVDFLPELRKMSIETNVSRRIGAAIAFN-NIYRIVREDE-ALIDVYWIY        | 1048 |
| BOMBUS          | -----SQSMIKYVHKRINPALSPTSSTRKAGAPAFN-HIYSILREDE-KVTSIHWLE        | 1022 |
| ANT             | -----EHIKELIETLNLALHPTKRLGAAIAFN-HLMIYLRRED-DTISIHWLE            | 1041 |
| WHIPWORM        | -----RLDKADLVDRRLDMALHSNWTKRFAAFALNNGIVKTLRDNK-HCTDKYTTLE        | 1087 |
| TRICHIANELLA    | -----SESKVELLVQILITFAVHSSAVKAGAAVAFN-NLYKIIIRKR-WLVDIYILE        | 1086 |
| BEEFLE          | -----DPINIKLVKMLRPFYSMHPDSNKKLGAALIFN-SIYRDIRREL-SLLSMPFWE       | 1038 |
| BARNACLE        | -----QKVAPLLEALVGHLPDPYRRLGAAIAFN-NLYRVRRED-RLLDVFLLE            | 1044 |
| THRIP           | -----AKVAPLLEALVGHLPDPYRRLGAAIAFN-SMYAVLRED-KIVDEFWIE            | 1029 |
| FLA             | -----SSVNLEALISKICDYSINSSVHKQLGAAITFN-NLYMIFREED-NIVDQFVIQ       | 1010 |
| WHITEFLY        | -----VPLYIKGILSRINLYCVHPCKFKRLGAAIIFN-SIHSCLREBK-PILNEHWLE       | 1052 |
| TICK            | -----GPTNVQSVLRRLCSYCRHPSALKRLGAAIVFN-NLYVLLREDE-SLVDVFIID       | 1059 |
| TERMITE         | -----VNIKYVMKQIYSPCLHPCPSKRLGAAIVLN-SVYTVLREDE-SVVNQFWLE         | 1063 |
| DAPHNIA         | -----DPATPEFFLQKRLASATHPSHHQRHGAIVFN-KLYRVMRED-PLTSIYTLD         | 1023 |
| OSTREOCOCCLUS   | -----GSVNHFRILRALGLIGHSAEHLGAAITAFN-RCLKHIAKQ-FLIDEPVLK          | 1099 |
| STENTOR         | -----SLANFSPQSEKRLGAAIAFN-KILAPSLRE-VLIDREFLE                    | 982  |
| KLEBSORIDIUM    | -----NFVNVTSMLRRLNRLDHPNPYRRLGAAIAFN-SLYPLVYR-CIVDRHFE           | 1168 |
| CLUBMOSS        | -----NFVNVTSMLRRLNRMHPSFYHRLGAAIAFN-QIYVILRNS-SIVDRYIFE          | 1054 |
| MOSS            | -----NFVNVRSMLRRLNRMHNPYRRLGAAIAFN-RMYPVLRNG-AIVDRYIFE           | 1118 |
| LIVERWORT       | -----DFVNIASMLRRLNRMHNPYRRLGAAIAFN-RIYVPLRNG-NIVDRYIFE           | 1133 |
| LIGNANO         | -----DSTASFYSRNVKSIKRVCLLALHPASSKRLGAAIAFN-AVYAQFRED-SLVNAFAFE   | 1151 |
| COPEPOD         | -----KNINIKTVLRLVYWKHPDIDGKRLGGSVFN-SIYRIFREED-KLVSEHLLV         | 1053 |
| GLOBOSUM        | -----NPINAKSLFKRLVLLCQHASSAKRLGAAIIFN-RIYTVFREED-ALVDQFVME       | 1031 |
| PALUSTRIS       | -----NPMNAKSLKRLVRLSLSSSHKRLGAAITFN-RIYRILREDE-SLVDQFVFE         | 1079 |
| NEOCALLIMASTIX  | -----LIENIEVLEKMIQYCRNPNYKRLGAAIIFN-KIYVLRREDE-KIVDKPLFE         | 1136 |
| GLOMUS          | -----SSMNMKSLKRLVNLCAHPDYTKRLGAAIAFN-NIYRIVREDE-YLVDQFVFE        | 1158 |
| LOBOSPOR        | -----SANVKSLLKRLVSLASHNPYKRLGAAIVFN-RIYRIVREDE-PLVNOFTME         | 1110 |
| SYNCEPHALASTRUM | -----NPMNAKSLKRLVRLSLSSSHKRLGAAITFN-RIYRILREDE-SLVDQFVFE         | 1091 |
| FUNCTIVORUM     | -----NVGAVKGLFKRLVCLSRHPNPYRRLGAAIAFN-SSMEMKRES-ALVDQFAME        | 902  |
| HALBUM          | -----SAFNFKSLKRLVSLAAHPSAQTWGAASLAL-SLIRVMRED-NLISVPLFE          | 1193 |
| DPURPUREUM      | -----NAFNFKSLKRLVSLAHPDPFKRLGAAISFN-ELYRVRRED-SLVDQFPIE          | 1182 |
| PVIOLACEUM      | -----NPFNFKSLKRLVSLAHPNSHKRLGAAISLAL-ELYRVRRED-ILVNHPIFE         | 1159 |
| AMPHIPOD        | -----SAAHADAVHHLNLSVMKRIIHLMRHPSAFKRLGGCVAFN-AVYTEVREDE-TAVNVWLE | 1126 |
| SHRIMP          | -----NSVSSNKSIIKRLVSPCKHPSAFKRLGGALAWN-SIYREIREDE-QAVDIWTL       | 1086 |
| MUDCRAB         | -----NQASLNLSLILKRLVSPCKHPSAFKRLGGALAWN-SIYREIREDE-LAVETWLE      | 1083 |
| TARDIGRADE      | -----PPAATALLERIVSYAGHSCAKRFGAAIAFN-HCYKTFREES-AVVDVFTID         | 1118 |
| HYDRA           | -----NPGNPRRLFKRMISLACHPNPYKRLGAAIVFN-NCYTVFREED-ILVNTFILE       | 1052 |
| SALPINGOBECA    | -----GGLVKVLLKRLVSMASHPNAPFORMGAAIAMN-NIYRILREDE-TLVDVYVCE       | 1100 |
| SPIDER          | -----PVERLLEKLSHPSLHPNSFKRLGAAITFN-SLYNVFRRED-FIVRKYTYLQ         | 1103 |
| LIMULUS         | -----SPVNIKALMKRLVSYCLHPNSFKRLGAAIAFN-HIYAILREDE-PLVNMFILE       | 1104 |
| SCORPION        | -----NPIGMNVFLKRLVSLHPNPYRRLGAAIAFN-SIYTVFREED-SLVDKFTLE         | 1102 |
| ROTLIFER        | -----SAPTFVNAKSLKRLVNFILHPNANKRLGAAIAFN-SVYTVFREED-SIVNRHIFE     | 1116 |
| CIONA           | -----VRNNAKSLFKRLVSLALHPTPMKRLGAAIAFN-HIYRVRRED-TLVDEPIFE        | 1095 |
| OCTOPOUS        | -----NPVNVISVLRVLYSYLHPDPFKRLGAAIAFN-NFYTVFREED-ILLDQFVFN        | 1073 |
| CAPITTELLA      | -----GPANPKRLKRMVSLLEHPSMMRLGAAIMFN-SIYSVFRRED-ALVDQFSLQ         | 1098 |
| LIMPET          | -----SPVNASSILKRLVSPALHPSVFKRLGAAIAFN-NIYQIFREED-SLVDRYTFQ       | 1090 |
| SCALLOP         | -----SPINAKSLKRLVSYALHPSAFKRLGAAIAFN-NIYTVFREED-TLVDTFTFQ        | 1120 |
| LINGULA         | -----NPHIPKSLFKRLVSPALHPSVFKRLGAAIAFN-HIYRVRRED-VLLDIFTFE        | 1107 |
| OYSTER          | -----SPINAKSLKRLVSYALHPSAFKRLGAAIAFN-NIYTVFREED-AMVNLVTFQ        | 1098 |
| SNAIL           | -----NPNVTSILKRLVSPALHPSAFKRLGAAIAFN-NIYVFRRED-SLVDRTTFQ         | 1102 |
| SPONGE          | -----SPMNTKSLKRLVSMGHPSTAKRLGAAIAFN-SIYTVLREDE-SLVDVFIIE         | 1108 |
| PRIPAPULA       | -----SPGNTKSLKRLVSLALHPSAAKRRGAAIVFN-NIYTVLREDE-MLVDTFIIE        | 1118 |
| DANTIO          | -----SPANKSLFKRLVSLALHPSVFKRLGAAIAFN-SMYRQFREES-SLVQFVFE         | 1116 |
| ESHARK          | -----SPANTKSLFKRLVSLALHPNVFKRLGAAIAFN-SLYRFRRED-ALVDQFPIE        | 1106 |
| BHARK           | -----SPVNTKSLFKRLVSLALHPNVFKRLGAAIAFN-SLYRFRRED-ALVQFVFE         | 1108 |
| XENOPUS         | -----SPVNTKSLFKRLVSLALHPNAPFKRLGAAIAFN-NIYRDFREED-ALVENPVFE      | 1124 |
| STERLET         | -----SPANTKSLFKRLVSLALHPNVFKRLGAAIAFN-SIYRQFREES-TLVDQFPIE       | 1120 |
| GAR             | -----SPANTKSLFKRLVSLALHPNVFKRLGAAIAFN-NIYQFREES-SLVDMEVFE        | 1109 |
| HUMAN           | -----SPVNTKSLFKRLVSLALHPNAPFKRLGAAIAFN-NIYRFRRED-SLVQFVFE        | 1102 |
| PLATYPUS        | -----SPVNTKSLFKRLVSPALHPNPFKRLGAAIAFN-NIYRFRRED-SLVDQFVFE        | 1104 |
| TASDEVIL        | -----SPVNTKSLFKRLVSPALHPNAPFKRLGAAIAFN-NIYRFRRED-ALVQFVFE        | 1107 |
| COELACANTH      | -----TPANTKSLFKRLVSYALHPSAFKRLGAAIAFN-NLYKFRRED-ALVDKPVFE        | 1110 |
| CAECILIAN       | -----SPVNTKSLFKRLVSLALHPNAPFKRLGAAIAFN-NIYRFRRED-ALVDQFVFE       | 1111 |
| CANARY          | -----SPANTKSLFKRLVSLALHPSAFKRLGAAIAFN-SIYRFRRED-SLVQFVFE         | 1101 |
| OSTRICH         | -----SPVNTKSLFKRLVSLALHPSAFKRLGAAIAFN-SIYRFRRED-SLVQFVFE         | 1071 |
| GECKO           | -----SPVNTKSLFKRLVSPALHPNAPFKRLGAAIAFN-SIYRFRRED-ALVDQFVFE       | 1110 |
| TURTLE          | -----SPVNTKSLFKRLVSLALHPNAPFKRLGAAIAFN-NIYRFRRED-SLVQFVFE        | 1110 |
| ALLIGATOR       | -----SPVNTKSLFKRLVSLALHPNAPFKRLGAAIAFN-NIYRFRRED-SLVQFVFE        | 1070 |
| APLYSIA         | -----NPINAKSLKRLVSMASHPNAPFKRLGAAIAFN-NIYVFRRED-ALVDRTTFQ        | 1107 |
| TRICHOPLAX      | -----TSNNAKSLKRLVSLASHPSAIKRLGAAIAFN-NIYVFRRED-TLVDTFPIE         | 1087 |
| SOFTCORAL       | -----SPINIKSLFKRLVSLATHPSANKRLGAAIAFN-NIYRFRRED-SLVENFTIE        | 1100 |
| STONYCORAL      | -----SPINIKSLKRLVSLALHPSASKRLGAAIAFN-NIYTVFREED-SLVDIFVLE        | 1118 |
| SEA ANEMONE     | -----SPINIKSLKRLVSLALHPNASKRLGAAIAFN-SIYTVFREED-SLVDVFLLE        | 1105 |
| SEACUCU         | -----SPINTKSLKRLVSMALHPSALKRLGAAIAFN-NIYTVFREED-SLVQFVFE         | 1117 |
| LANCELET        | -----SPINIKSLKRLVSLALHPNPFKRLGAAIAFN-SIYRDFREES-SQVDMFTFE        | 1124 |
| STARFISH        | -----SPINTKSLKRLVSMALHPSVFKRLGAAITFN-HIYTVFREED-SLVDQFVCE        | 1124 |
| SEA_URCHIN      | -----SPINTKSLKRLVSMASHPNAPFKRLGAAIAFN-SIYTVFREED-SLVDQFVFE       | 1128 |

Supplementary Figure 6 CLUSTAL OMEGA ALL PHYLA, EXPANDED

|                 |                                                                         |      |
|-----------------|-------------------------------------------------------------------------|------|
| PARAMECIUM      | IIVQLKPIPIVEDKDI-----SR-IVSNTNNI <b>II</b> IIIS <b>II</b> PERF--TQDLLQ- | 1099 |
| TETRAHYMENA     | TIQTSMRIVQKT---G-----VSNEVEDNFNLIKLOT <b>II</b> IQKN--YKTLKA-           | 1155 |
| STYLONCCHIA     | IAHNVLSGLKMCNHSIE-----FSQEVINDCIMMLEKRVKVVQRK--ISILMN-                  | 1130 |
| APHANOMYCESa    | MAKNVLVALKPPDDPNAVL-----PLVHALAHMEKILVVR--AADLQH-                       | 1056 |
| APHANOMYCESa    | IQYLLLAALKSEG-SDSAL-----SLHHAVDHMEKIIILKS--APTLOH-                      | 1033 |
| PYTHIUM         | CMKNLLYSRLCCDDWSGGGNEATD-----IAQEIITAKAILLQORASRF--SSLFPS-              | 1112 |
| PLASMOVARA      | CLKNLLYALRLCCSDAQYQIGDD-----VAREIMLANAVMKIERGICRF--PHLPLS-              | 1115 |
| BREMIA          | CLMNLLYALRLCCDRDAKNRIGGVV-----ISHDVITKAVLKERGICRF--SHLFLN-              | 1106 |
| AEDDES          | LFYVFCMNFVMTEDF-----D-----GSTTNLEQVSATIDHLVRLVVR--KVVFN-                | 1132 |
| MIDGE           | LLDTFAINFKNSDEF-----SVNLDNSEQEIQITATMSHLTRVIVR--SDIFHR-                 | 1097 |
| BOMBUS          | LLYSFKSLDGCSDP-----SIIANLHVPERVLIAR--KNLLMA-                            | 1059 |
| ANT             | LFYSFVCSLDGCNDL-----SITNALSHKRVKVVK--ANLMT-                             | 1078 |
| WHIPWORM        | LFVFLMRLSLVATEK-----E-----DYGVVEEBCVKALGRLEMLVRY--VALFOA-               | 1132 |
| TRICHINELLA     | MFPTMKSLYLAEND-----D-----ELYGVDECKQAIKIRRIILHN--LMDLQI-                 | 1131 |
| BEEBLE          | LIHIFVKSFSLEND-----G-----IDENLVQINNALSRLEGFVEK--SDFLNN-                 | 1083 |
| BARNACLE        | VTAALLAALARAHAD-----P-----SALGTTAAADALGHORILAAAR--ASHLLE-               | 1089 |
| THRIP           | LLYGLVTLSSCSIT-----G-----EDSSAEAHIDKSLQVLRVLMEC--SNKFNL-                | 1074 |
| FLEA            | LSTYFVQSMVNDKH-----T-----NI-----QOLEETLNHLMRVIVEK--SDFN-                | 1051 |
| WHITEFLY        | LMYYLLKNLSSEEN-----N-----DC-----SDQLRSALRIILRVFEKEEPRKMLNS-             | 1096 |
| TICK            | ILAHFVDSLKAHSD-----E-----RTIGTRELSCALDVLRIIVSTK--SELLNR-                | 1104 |
| TERMITE         | LLYHMMNLSLSEET-----D-----SILGGQEVVTVANHIERVLEK--ASLFNK-                 | 1108 |
| DAPHNIA         | LLTHFVTSLSLGERD-----P-----FSSEILHQSQUALYHLITVNLK--RNIFEH-               | 1068 |
| OSTREOCOCCUS    | MLDVTLSKMSRSDEHAAG-----K-----SMRGADVAMAVLQELHIIQAN--ANRLLS-             | 1147 |
| STENTOR         | FMDVFTRLSHYD-----S-----SSEETLDYCKTTLNHLKALBNK--FSVFCV-                  | 1027 |
| KLEBSORIDIUM    | LFYCAKSLRLAERD-----S-----ETIGTVRQMSRVRHDLKRVKRF--YDPLKY-                | 1213 |
| CLUBMOSS        | LAPFLKSLRVGDDT-----A-----BOIGTIKQAYKALDLEKLIIVRN--ISLLQK-               | 1099 |
| MOSS            | ILFFCIKSLKLGELD-----D-----EQIGTMKQNKTELLQRLVTRN--ITLLEK-                | 1163 |
| LIVERWORT       | ILFFCVKSLRLAESD-----D-----VOTGTAKOVNKTLEVMKLVERN--ISALQR-               | 1178 |
| LIGNANO         | LLHCFMRSIQLADAD-----D-----ASLGTVEQCNLALDHLERIMVER--AATLKV-              | 1196 |
| COPEPOD         | LLSSIFPAKISSHND-----P-----LFCGTSASLQNLHLKRIIFHY--LPLFQT-                | 1098 |
| GLOBOSUM        | LLYHLLFSLKISDRD-----N-----PALGTALVIAIDMAKIVVVK--HELFLA-                 | 1076 |
| PALUSTRIS       | LLYHLLMALAEND-----H-----TGLTQQTIRKGVHLLKIIKSK--SDFLRS-                  | 1124 |
| NEOCALLIMASTIX  | ILYYILYNLKLSSYD-----K-----DEIETTEQCKVAINHIIIRILKVK--YSIFLM-             | 1181 |
| GLOMUS          | LLYWMVNLRLSDND-----Q-----SATGTROQAISATIRHLKIIIVK--SNLFLN-               | 1203 |
| LOBOSPOR        | LLYWLLFSLRLAETD-----H-----SGLGTRHQACLAIRLQRIIVQVK--AALFLK-              | 1155 |
| SYNCEPHALASTRUM | LLYWMLFSLRLAUSD-----H-----PSLGTREQSKAISHKRIIREK--APAFLE-                | 1136 |
| FUNCTIVORUM     | ILHMHVTRLCRHD-----D-----WSLGVAEKARVIMDLORVIBAS--AKVLVK-                 | 1117 |
| HALBUM          | IAHQVLSMRLCGVADEGDDTPTT-----LEVEVEKGLQAVDANVIVIERR--AELLNR-             | 1246 |
| DUPURPUREUM     | ILHNIFFSLRIGDDNSSD-----D-----SIVEISSKYTVLVALTVIVR--ATMLNK-              | 1230 |
| PVIOLACEUM      | IMHNLFSRLRIGDDNADD-----D-----SIEIASKFSNVLVALTVIVR--ADLNN-               | 1205 |
| AMPHIPOD        | LFAAVALCTLAADK-----H-----AALPCAALASTSLRILCRATHY--KNLFNA-                | 1171 |
| SHRIMP          | LLAHLMTSLDLAQVD-----D-----PALGTHEQTKSAINHIERIIRVK--SDFQK-               | 1131 |
| MUDCRAB         | ILSHLMSALDLAHD-----D-----LVLTGHEQTRAAILHVRRIILVR--KELFWK-               | 1128 |
| TARDIGRADE      | LIVTFTKSLALCHRD-----P-----PGFGSTRKAVELLLHLARIVKEY--AKTLIS-              | 1163 |
| HYDRA           | LLLVYINGLSLSHKD-----E-----KSPGSDIQVELSLQHEKIIKVK--CDILLK-               | 1097 |
| SALPINGOECA     | ILTDVFMRSIQLAHRD-----D-----PAMGTATHTERVTLNLRILKVK--ADKFR-               | 1145 |
| SPIDER          | ILVLFVDSLALAHFD-----S-----SSLTQEQCVNALHLEKIIIVVK--HSLFIK-               | 1148 |
| LIMULUS         | TLVHFVNSLALAHKD-----E-----KSLGTQEQCKQALDHLERILRVR--AELLNK-              | 1149 |
| SCORPION        | IAVHFIESLALAHYD-----D-----KILGTQEQCKQALDHLERIMRVR--AKLLSK-              | 1147 |
| ROTIFFER        | ILFYLESLSLMSEND-----D-----KMGFTQEQCKGLDHLERILKVK--SOLLQ-                | 1161 |
| CIONA           | TLVTFINSLSLSHVD-----E-----MFIGTKVCKQALEHIERIISVK--SMLCK-                | 1140 |
| OCTOPUS         | LLVHPVKSALCHKD-----D-----QSLGVNSQCKALDHLERILKVK--ADMLKE-                | 1118 |
| CAPITELLA       | ILSVLVNSLALAHRD-----D-----KSLGTQEQCKSALLHLERILKVK--QVTFNK-              | 1143 |
| LIMPET          | ILVHFVESLALAHKD-----D-----KSLGTQEQCAVALHLERILKVK--EDILK-                | 1135 |
| SCALLOP         | TLVHFVESLALAHKD-----E-----KSLGTQEQACKALEHLEKIIICK--ADILRK-              | 1165 |
| LINGULA         | ILVTFIESLALAHHD-----D-----KSLGTQEQGVQVNLHLERILVVK--AALLCK-              | 1152 |
| OYSTER          | ILVHFVESLALAHED-----E-----SSMGTQEQCKMVDHLERILRVR--ANVLSK-               | 1143 |
| SNAIL           | ILVLFVESLALAHQD-----E-----ASLGTQEQCKKALEHVEKIVCKR--VDILRK-              | 1147 |
| SPONGE          | MLVVMVNSLALAHKD-----A-----QSIGTVQCCSLDHLERILKVK--SSTCLSK-               | 1154 |
| PRIAPULA        | ILVTFVDSLALAHND-----E-----KSLGTQEQCAQALDHLERILRVR--AHLNKK-              | 1163 |
| DANTIO          | VLVVFVESLALAHFD-----E-----KSVGTVQCCSSLDHLERILKVK--ADSLN-                | 1160 |
| ESHARK          | VLVVVFVESLALAHAD-----D-----KSLGTVQCCDAIDHLERILKVK--ASALN-               | 1150 |
| BHARK           | VLVVVFVESLALAHAD-----D-----KSLGTQCCDCIDHLERILKVK--AHLN-                 | 1152 |
| XENOPUS         | VLVIVMESLALASHAD-----E-----KSLGTTQCCSDANDHLERILRVR--AASLN-              | 1168 |
| STERLET         | LLVIVVESLALAHAD-----E-----KSLGTQCCSDAIDHLERILKVK--AASLN-                | 1166 |
| GAR             | ALVIVVESLALAHSD-----E-----KSLGTQCCSDAIDHLERILKVK--AATLN-                | 1153 |
| HUMAN           | ALVIVMESLALAHAD-----E-----KSLGTQCCDAIDHLERILKVK--HVS LN-                | 1146 |
| PLATYPUS        | ALVIFLESALATHAD-----E-----KSLGTQCCDAIDHLERILKVK--HISFN-                 | 1148 |
| TASDEVIL        | ALVIVMESLALATHAD-----E-----KSLGTQCCDAIDHLERILKVK--HITLN-                | 1151 |
| COELACANTH      | TLVVVYESLALAHMD-----E-----KSLGTVQCCDAIDHLERILKVK--APSLN-                | 1154 |
| CAECILIAN       | ILVVVYESLALASHQD-----E-----KSLGTVQCCDAIDHLERILKVK--APSLN-               | 1155 |
| CANARY          | ALVVVLESALAHAD-----E-----KSLGTQCCDAIDHLERILKVK--APSLN-                  | 1145 |
| OSTRICH         | ALVVVLESALATHAD-----E-----KSLGTQCCDAIDHLERILKVK--APSLN-                 | 1115 |
| GECKO           | ALVVVLESALTHGD-----E-----KSLGTQCCDAIDHLERILKVK--ASTLN-                  | 1154 |
| TURTLE          | VLVVVLESALATHD-----E-----KSLGTQCCDAIDHLERILKVK--ASALN-                  | 1154 |
| ALLIGATOR       | ALVIVFESLALATHD-----E-----KSLGTQCCDAIDHLERILKVK--APSLN-                 | 1114 |
| APLYSIA         | ILVNVFVESLALAHAD-----E-----KSLGTQEQCKSALLHLERILRVR--VDMLEK-             | 1152 |
| TRICHOPLAX      | ILVNVVNSLALSHTD-----E-----KSLGTQEQCKSALLHLERILKVK--ASTLN-               | 1132 |
| SOFTCORAL       | ILVTVLESLEMAHED-----E-----ISLGTQEQCKSALLHLERILRVR--SSVLLN-              | 1145 |
| STONYCORAL      | ILVNVLECLCSLHGD-----E-----EARGTQEQCVQVNLHLERILKVK--AQLLVK-              | 1163 |
| SEA ANEMONE     | ILVTVLESLALAHAD-----D-----PAQGTQEQCKSALLHLERILKVK--ATLDDK-              | 1150 |
| SEACUCU         | ILVATFVQSLAMAHHD-----A-----KSLGTQEQCKSALLHLERILKVK--ANILNK-             | 1162 |
| LANCELET        | ILVTVFVESLALAHHD-----E-----KSLGTQEQCKSALLHLERILKVK--ADLNNK-             | 1169 |
| STARFISH        | ILVTVFVNSLALAHHD-----D-----KSLGTQEQCKSALLHLERILRVR--ADMLNK-             | 1169 |
| SEA_URCHIN      | ILVVFVESLALAHHD-----D-----KSLGTQEQCKSALLHLERILRVR--AALLNK-              | 1173 |

Supplementary Figure 6 CLUSTAL OMEGA ALL PHYLA, EXPANDED

|                 |                                                              |      |
|-----------------|--------------------------------------------------------------|------|
| PARAMECIUM      | E-MK-GROCK-----NK-----TLYSLHEFLI-NEAM-IGKDGGMQAALSLWYLV-     | 1142 |
| TETRAHYMENA     | K-NE-NRSGQ-----FK-----LDSLLDKLYSY-GF-PNNSYLVRKSPELWOSIL-     | 1198 |
| STYLNONCHIA     | V-NP-KRSIH-----QS-----VFTF-----ILYLFKEP-VAIEVTKRRESMKLWEAIV- | 1171 |
| APHANOMYCESa    | D-DD-TRVVLGG--TDCL-----NLNAFTTWLFS--NV-ASSAPPTFRSNLRLFEOLA-  | 1102 |
| APHANOMYCESa    | E-NP-DRMLLGG--SGCL-----NLSEFTSWLFS--NI-ANASPDPRNRKDKLFTLS-   | 1079 |
| PYTHIUM         | S-QN-----EEE-----NLKSLTTLVLFH--QC-SRPESSYRRMQRPLMFAFA-       | 1150 |
| PLASMOPARA      | D-SS-T--TYSI--DNDY-----TLHQMTQLFQ--QT-GAREQSFRLRRIFLFSFS-    | 1159 |
| BREMIA          | E-NI-S-S-----KGT-----LQOQTTEVLFH--HS-TAPEVLFQRLRRIFMSFS-     | 1146 |
| AEDES           | E-SS-VRIVPRVF--GGS-----LLKDLVLLVLFH--QC-SSRESSYRHKMEVFPKLT-  | 1178 |
| MIDGE           | A-ST-ERIRPNPF--EGK-----TLIDVLRKLFKESGC-HOHHSRYRHMMEVFLKIL-   | 1145 |
| BOMBUS          | E-HH-NRRKPYEF--EGS-----TLVDVAVRLLT--QC-GCLDQCRKIKMELVVKLS-   | 1105 |
| ANT             | LMS-RRKPEF--DNA-----TLYALVLLS--QC-CTYDEHCRAKMELVWVLS-        | 1125 |
| WHIPWORM        | P-SS-VRKPRDW--KAA-----TLYCCLDLLE--EM-GRPVSSFTVTLTAVSNIT-     | 1178 |
| TRICHIANELLA    | H-NV-QRRTPNEW--SQS-----TVHCCDMLLN--TM-TWSNYQFSEEFISYOELT-    | 1177 |
| BEEFLE          | L-DT-QRRIPNEF--NGG-----KLADVAVRLLK--QT-GVKNHDCRTPKQRIEPCSL-  | 1129 |
| BARNACLE        | K-SE-QRRVPAGW--OGA-----TLPDLLSLVH--QC-GAPQTECHRAQYRLEALT-    | 1135 |
| THRIP           | D-SP-SRRIPREL--TGR-----NLWVVRVLLK--YC-TALNSQCRSHMKLVDCIA-    | 1120 |
| FLA             | D-SG-HRNIPQVL--NGC-----LKHVTVLFLK--HC-GFVENHCRKRMEMFLKLA-    | 1097 |
| WHITEFLY        | R-NP-NRKKPEF--EDE-----TLQGATLWLLK--QT-SSPSIVCRTEVMLFORFA-    | 1142 |
| TICK            | P-NV-KRKPWSDTGGEPV-----VLSTAVRLLL--QT-SRPQADCRHKMELVHALI-    | 1152 |
| TERMITE         | E-DN-IRKKPEF--EGI-----LLKDAVSVLLK--KC-GTVQVQCRHKMELVYVLA-    | 1154 |
| DAPHNIA         | P-DS-RRVAPFL--TQG-----TLPEDLDLILN--HA-LGSQRCHQIIELELGLIA-    | 1114 |
| OSTREOCOCCLUS   | S-PG-SKATE-----SVLEFLOVLE--LT-MSSDEFTFRKQKVPDVA-             | 1187 |
| STENTOR         | S-ND-KRTHK-----DLSELEWLE--QC-KRPERVARKQDHWKTLIS-             | 1068 |
| KLEBSORIDIUM    | P-RKQRPMPA-----TLQELQVLFH--QT-GRPQRCQOQHLLSALSA-             | 1255 |
| CLUBMOSS        | N-KK-DRVLCF-----TLEDFTWLFH--QT-KLSHERCRKQKALLSAVC-           | 1140 |
| MOSS            | K-RK-DRPLFL-----ALDDFLQVFE--QT-RLHGRSRTKQMLFCSIC-            | 1204 |
| LIVERWORT       | S-RK-DRPMLF-----TLDDFLEWLLH--QS-GQLQEACRSRQMLLSYIC-          | 1219 |
| LIGNANO         | E-SQ-QRRTPGLS--KWT-----SATLEVAVRVLV--QC-GOPESACRAAMRLVNDGS   | 1245 |
| COPEPOD         | N-PG-QRRIPVGF--SGG-----TLAHILDWLLD--LT-FLQTEARHAMTYLHEIC-    | 1144 |
| GLOBOSUM        | T-TS-SRRSPDL--PNC-----NLGTVTRWLFH--QS-KHKELEYKQIELDFKFA-     | 1122 |
| PALUSTRIS       | S-KS-TRRSFPGF--KEA-----DLGGLVDWIFA--EI-GRLEIYTAQQMOMVFMELA-  | 1170 |
| NEOCALLIMASTIX  | S-KE-SRRHFPGL--ENT-----DLKSLVEWLLH--ET-GALEIYVSKTMDLFLILN-   | 1227 |
| GLOMUS          | D-TP-RRRKPFL--NRS-----DLSLVEWLFH--ET-SRKEQDYSSMRLEFGEV-      | 1249 |
| LOBOSPOR        | D-SK-DRRIPGL--EEA-----TIDGLVHMLLR--ET-SRPEMEYKIKRMLPDSFV-    | 1201 |
| SYNCEPHALASTRUM | P-AS-QRRTPPGL--EEP-----TLQETVAVSFG--EV-GQLERDARSKMDFPNEFV-   | 1182 |
| FUNCTIVORUM     | V-NR-KRHEE-----DLRGLVEWLLH--NI-GRQEMSRVQDSTETLIS-            | 1158 |
| HALBUM          | T-NN-NRREHK-----DLADVGVNFG--EV-GRMERRYKPTIHALGRVIV-          | 1287 |
| DPURPUREUM      | T-QQ-SRREHK-----DLSHVQVLFQ--VGCSRAESVRYEMLMFSQLV-            | 1272 |
| PVIOLACEUM      | P-DT-SRREHK-----DLSDFVSNMK--DCCSRPENIARYESMQLFIQV-           | 1247 |
| AMPHIPOD        | R-SE-MRRIPDCL--TGS-----DGTAAALTEMLR--LC-GHRASALRHATASLPGA-   | 1219 |
| SHRIMP          | K-SG-QRRLPFGF--G-----DGTLDVVLKWFH--QC-GRPKALVRHTMELLASLA-    | 1177 |
| MUDCRAB         | M-SS-NRRIPDF--E-----GGTFEDMLWLE--QC-GSPKTLVRHMSMELLESLA-     | 1174 |
| TARDIGRADE      | T-AS-RRVVPVFL--DEGKLEKATLEKLTWMLM--QA-CRPELACRMSWALVGRFL-    | 1215 |
| HYDRA           | P-FK-NRRHPQF--KDTT--DFNLRHVMWLLS--EC-GSPQACRHKMELFISFM-      | 1146 |
| SALPINGOCEA     | T-SR-VRRIIPGW--ETC-----TLAEMTRWLT--HA-CDLHAAVRHKMAFPLHLA-    | 1191 |
| SPIDER          | S-EK-SRKKPECL--EEA-----TLQCTVLLK--QC-GCVQTECRHKMDLVKFA-      | 1194 |
| LIMULUS         | P-SK-QRRIPQCL--DGT-----TLSAAVLLVQ--QC-GKPQTECRHKMELVFKLA-    | 1195 |
| SCORPION        | T-SK-KRRPLRMT--NDS-----LLEPVEWLLK--NC-GCLQTECRHKMELVFLA-     | 1193 |
| ROTIFFER        | T-OP-KRVPKPGW--SEP-----VLEAVRMLR--QC-GRPTECRHKMELSHKLA-      | 1207 |
| CLONIA          | P-SD-IRRTPRCF--TNTT--SITLSMIVEWLFH--QC-GRPQTECRHKMELHHEFI-   | 1189 |
| OCTOPOUS        | V-SS-ARRQSQW--NQI-----TLYAIRMLVR--QC-GRPQTECRHKMELVYNLA-     | 1164 |
| CAPITELLA       | D-SK-QRIKPRGW--RDA-----NMTTAVRMLLR--QC-GRPQTECRHKMELVQOLA-   | 1189 |
| LIMPET          | P-SK-IRQEPREW--SNK-----TLDIARVLSR--QC-GRPQTECRHKMELVYNLC-    | 1181 |
| SCALLOP         | E-SK-LRTEPSQW--SKI-----TIDICVRWMLR--QC-GRPQTECRHKMELVHKMT-   | 1211 |
| LINGULA         | D-SK-IRRKPFTW--NKA-----TLDICVRMLLR--QC-GRPQTECRHKMELVYKLA-   | 1198 |
| OYSTER          | E-DK-NRTEPKQW--SVV-----KLDIARVMLR--QC-GRPQTECRHKMELVHOLA-    | 1189 |
| SNAIL           | P-SP-HRKEPSEW--SKQ-----TLDIARVMLR--QC-GRPQTECRHKMELMYKLA-    | 1193 |
| SPONGE          | A-NK-NRRVPRGL--KSA-----DLSILTAVLLA--QC-GSIETEARKMQRKLVOLA-   | 1200 |
| PRIAPULA        | D-KK-SRKRKPEF--TDA-----TLPTVVGWLLQ--QC-GRPQTECRHKMELVCKLS-   | 1209 |
| DANTIO          | L-NS-KRRIPRGF--PADQ--SVCLSNVWLLT--QC-GRPQTECRHKMELFFEFV-     | 1209 |
| ESHARK          | K-PI-KRVPKPGF--PPDQ--PVSLDVMWLLV--QC-GRPQTECRHKMELVYELV-     | 1199 |
| BSHARK          | K-PV-KRVPKPGF--PADQ--MVCLFDVWMLLT--QC-GRPQTECRHKMELFFEFV-    | 1201 |
| XENOPUS         | K-AT-KRRIPRGF--PQGN--TVCLFDVWMLLE--QC-GRPQTECRHKMELFFEFV-    | 1217 |
| STERLET         | K-TS-RRVPRGF--PPDK--PVCLLDVWMLLV--QC-GRPQTECRHKMELFFEFV-     | 1215 |
| GAR             | K-SS-RRVPRGF--PPDK--PVSLDVMWMLLV--QC-GRPQTECRHKMELFFEFV-     | 1202 |
| HUMAN           | K-AK-KRRIPRGF--PPSA--SLCLLDVWMLLA--HC-GRPQTECRHKMELFFEFV-    | 1195 |
| PLATYPUS        | E-EK-NRRIPRGF--PNAR--SVRLDVMWMLLV--QC-GRPQTECRHKMELFFEFV-    | 1197 |
| TASDEVIL        | K-PK-KRRIPRGF--PPVQ--TLCLLDVWMLLA--QC-GRPQTECRHKMELFFEFV-    | 1200 |
| COELACANTH      | K-AA-TRRVPKPGF--SPDK--VFCLSDVMWMLLV--QC-GRPQTECRHKMELFFEFV-  | 1203 |
| CAECILIAN       | K-TL-KRRIPRGF--PSTK--SSVCLSDVWMLLV--QC-GRPQTECRHKMELFFEFV-   | 1205 |
| CANARY          | K-EG-KRRVPRGF--PPTK--SVCLDVMWMLLV--QC-GRPQTECRHKMELFFEFV-    | 1194 |
| OSTRICH         | R-AG-KRRVPRGF--PATK--TVCLLDVWMLLV--QC-GRPQTECRHKMELFFEFV-    | 1164 |
| GECKO           | K-ES-QRRIPRGF--PAK--SICLEDVWMLFL--QC-GRPQTECRHKMELFFEFV-     | 1203 |
| TURTLE          | K-AE-KRRIPRGF--PNAX--SVCLLDVWMLLV--QC-GRPQTECRHKMELFFEFV-    | 1203 |
| ALLIGATOR       | K-AE-KRRIPRGF--QPAE--SLCLLDVWMLLM--QC-GRPQTECRHKMELFFEFV-    | 1163 |
| APLYSIA         | D-PG-LKVRPEP--SAWS--SRKLEFAVRMLR--QC-GRPQTECRHKMELVYNLC-     | 1200 |
| TRICHOPLAX      | E-SK-NRRTPGTF--MTK--TVTTHVWMLVR--QC-GRPQTECRHKMELVYGLA-      | 1180 |
| SOFTCORAL       | V-NK-KRRVPRGF--SAD--TTTLRHLIPVLR--KC-GCSQTECRHKMELVSVLA-     | 1193 |
| STONYCORAL      | E-NH-KRRIPRGF--ASQS--SITLHMLIPVLR--QC-GRPSSECRHKMELVSKLA-    | 1212 |
| SEA ANEMONE     | E-NK-QRRIPRGF--QMLD--SITLSHLIPVLR--LC-GKPQTECRHKMELVQVLT-    | 1199 |
| SEACUCU         | E-NK-HRRIPRGL--PGN--CKTSLHLLVLLN--QC-GSPQTECRHKMELVFNLS-     | 1210 |
| LANCELET        | H-SK-VRVPRGF--DRES--PPTLPLDVTWLLQ--QC-GRPQTECRHKMELVCSFL-    | 1218 |
| STARFISH        | E-SK-IRRIPREF--PAGV--CPTLSMIVWMLLR--QC-GRAQTECRHKMELVYKIT-   | 1218 |
| SEA_URCHIN      | E-SK-NRRVPRGL--PEDC--SPTLSHMVWMLT--QC-GRPQTECRHKMELVYGLT-    | 1222 |

Supplementary Figure 6 CLUSTAL OMEGA ALL PHYLA, EXPANDED

|                 |                                                               |      |
|-----------------|---------------------------------------------------------------|------|
| PARAMECIUM      | -----SKTQKVI---KKNARELLV---DQIAEI--GQMKLFP--KYPINRL           | 1179 |
| TETRAHYMENA     | -----NRESDI--S-----CK--KFLAKR--KQGDNL-----                    | 1220 |
| STYLNONCHIA     | -----RCIPPTN--IENMPDNPKVWIFSYLYQR--RGEKAIK--RPAKISF           | 1212 |
| APHANOMYCESa    | -----RMVN---M-TGS---CKAWLQPOKQNH---SAAQLQY--ILAPPAL           | 1136 |
| APHANOMYCESa    | -----RMVG---M-TGS---CKEWLQYQKSH---TVGQLD--VLAPQEL             | 1113 |
| PYTHIUM         | -----AIVN---GSS---CKKWIQAHASTE---GCDRIVE--ILAMPDN             | 1183 |
| PLASMOPIRA      | -----ALIS---T-S---TTEWMHNYETVQ---ERKSILA--VMVPLSA             | 1191 |
| BREMIA          | -----VLVD---K-S---IPEWMQSYELKH---SGESIIG--VLVPIA              | 1178 |
| AEDES           | -----SSVD---G-CRS---AAEFVGEYLSQD---EILDICD--HVDTV--           | 1210 |
| MIDGE           | -----P-----V-CGV---KEEICGKILNVE---KILVV-----GER--             | 1170 |
| BOMBUS          | -----EHVA---D-CDS---AKTINNYIDY---GIETPNS--IILSQLP             | 1139 |
| ANT             | -----QDIG---S-YA---QETQNFVQIY---GIMRLND--IILKGLE              | 1157 |
| WHIPWORM        | -----AS-L---K-MDH---PODYSSDMKR-----ITE--HFESRHL               | 1206 |
| TRICHINELLA     | -----DAEI---E-KLH---FLRHIGTIFG-----FID--HFESHR                | 1206 |
| BEEBLE          | -----SKCK---G-YTN---MQNFINSHPDGS---WM---RD--IYETY--           | 1158 |
| BARNACLE        | -----PLAP---A-AGG---LRGLVAA---GG-GA---VR--LLEHA--             | 1161 |
| THRIP           | -----RVVS---D-CRS---TKDFIESVISIE---GNCSLL--VABGETS            | 1154 |
| FLA             | -----VLVD---E-INT---AHMFIMQNTGNF---VIKSVIE--IGECSTN           | 1131 |
| WHITEFLY        | -----SFLP---G-FIS---ASNLYNLSLSTE---GEDFVSN--LVEEN--           | 1174 |
| TICK            | -----PKLP---G-APS---HQSYMSLLQGN---SPGFVVE--SPEGNLA            | 1186 |
| TERMITE         | -----PLLP---V-CKS---GSEFVSWYAATH---SWTISIIR--ICEGSKS          | 1188 |
| DAPHNIA         | -----RP-----QS---LAEVMI-----QFFSRQPLESHL--                    | 1136 |
| OSTREOCOCCLUS   | -----PISV---SD---TSEWQARSHLVS---SSDALVP-----                  | 1214 |
| STENTOR         | -----LISK---YN---LNAWSEPEWQK-----                             | 1086 |
| KLEBSORIDIUM    | -----PESA---E-GS---AAVWFRSKLSPS---TPLEALLE--PFDVQHP           | 1289 |
| CLUBMOSS        | -----SALP---G-GS---CMHWFRPRTGT---QRLHMLAG--LPEKLP             | 1174 |
| MOSS            | -----LSIP---G-CS---SAHWFRANICSG---DQVSVTVK--QPDVMD            | 1238 |
| LIVERWORT       | -----RLLP---A-GS---LASWYRSKLDHG---ADMESIIG--VFNVEE            | 1253 |
| LIGNANO         | PTDRRSRVGGLARCLLTSSEPKRQOATAASPRQFFOALLKQF---KANYFYD--RWERFOP | 1301 |
| COPEPOD         | -----RRTSTS--A-AQP-----ILEKFG---TINKLIL--RVEHALT              | 1174 |
| GLOBOSUM        | -----SRMT-----G---VVSMMKNIQTNN---ERYVFD--LFLKLP--             | 1150 |
| PALUSTRIS       | -----PLIS---T---PKFVRSRSSSK---PTFIPD--ILERTNL                 | 1200 |
| NEOCALLIMASTIX  | -----PLLP---E-NSK---IG--LNLFLANN---NNLFND--IYKVEL             | 1258 |
| GLOMUS          | -----KLLP---D-FKT---GFRWVKARIDRD---PKFLES--LYKNSL             | 1282 |
| LOBOSPOR        | -----KLLP---G-SPS---SGTWIGAKITHN---AGFVAS--LYQCPQY            | 1234 |
| SYNCEPHALASTRUM | -----VTLP---G-IHS---AKDWLQERYARD---DDYITN--ILETQRL            | 1215 |
| FUNCTIVORUM     | -----VCLP---G-IHT---TEQCVRFSSTQ---SGTTHVLR--SIQPY--           | 1191 |
| HALBUM          | -----QLLP---G-OKR---ANLWIQOVQK---HGLAALIK--MAEPPT             | 1321 |
| DPURPUREUM      | -----VLLP---S-KKT---PLQVVKDHVNT---NGLSPIIS--VAEPRT--          | 1305 |
| PVIOLACEUM      | -----VLLP---G-IKT---PIQWIKKQPL---DQY--LIS--IAESQAV            | 1279 |
| AMPHIPOD        | -----SSVL---G-CSN---LQSLVDQRFKA---NRLDLVLVEVLERGGC            | 1255 |
| SHRIMP          | -----PQVK---G-CAS---VRDFIEKYVG--I---SKLSEIVD--ILEGGGE         | 1211 |
| MUDCRAB         | -----PHSK---D-YTS---VHKFIGQOLEKP---ESIKKLV--IIEGGGQ           | 1209 |
| TARDIGRADE      | -----LALK---N-ATS---GGYFFENLARSK---GPGWPSK--AFPCGGF           | 1249 |
| HYDRA           | -----LLQE---G-VEE---YMKNAIADR---DGDLDLR--YFEGGGI              | 1177 |
| SALPINGOEA      | -----PLDTPD--E-TGKPYATAHAWVAA---F---GAPALVA--LVEQGS           | 1227 |
| SPIDER          | -----PFSP---G-CSQ---NLSSFIIITYENC---GKNIIED--VFEAILQ          | 1228 |
| LIMULUS         | -----PCLP---G-THN---TQEYFQQLKMK---GQPFIN--SFENGLK             | 1229 |
| SCORPION        | -----PCLS---G-FNG---CKDFSHLLETK---GKFFLN--CFSEMS              | 1227 |
| ROTIFFER        | -----PNIS---G-VKD---IKYFWIRLVNE---SEMFLA--RFBOSTL             | 1241 |
| CIONA           | -----KLLPT--E-ERS---ATSWVKRKLTKY---GAGNLVK--RFEWGLV           | 1224 |
| OCTOPIUS        | -----PQIQ---G-IKQ---SEEFQIFYEKE---GHNYFIE--RFEGGGE            | 1198 |
| CAPITELLA       | -----PCVH---E-ING---ARELFSVLISQ---GNSEYFIQ--RFEFGMY           | 1223 |
| LIMPET          | -----THVQ---G-N-----YFVSFDLIDIVDKSTI--IKK--VFEGGGT            | 1213 |
| SCALLOP         | -----PLIQ---G-IKS---TQMYFQAFKSE---KQKYFIT--RFEGGGH            | 1245 |
| LINGULA         | -----PCVP---E-FQS---VQGFQKFLKMS---GGQYFME--RFEAYRL            | 1234 |
| OYSTER          | -----PCIT---G-IKS---TKDYFTFYKSE---KASYFIN--RFEKQQQ            | 1223 |
| SNAIL           | -----PLIP---G-ISS---PFDFKAAALDIQ---NASYFVV--RFEGGGQ           | 1227 |
| SPONGE          | -----PPSS---N-VVN---IRMWIRKTIESE---GGNYFVT--RFEHSHG           | 1234 |
| PRIAPULA        | -----MHQSKL--P-VKS---AAEFFKLLLDLH---RAEYFIE--RFEAGGI          | 1245 |
| DANTO           | -----PLLP---G-NSS---PAMWLDQQLKQR---GPGFLIS--CLEGGG            | 1242 |
| ESHARK          | -----PLLP---G-NKT---PSCWLADVLKER---GVSFLIN--KFEAGS            | 1233 |
| BHARK           | -----PLLP---G-ART---ASLWLEILKRN---GVSFLIN--KFEAGS             | 1235 |
| XENOPUS         | -----PLLP---G-NKP---LTAWLDDQVEKE---GIIFLIN--RFEAGH            | 1251 |
| STERLET         | -----PLLP---D-NKS---PASWLDLILKQ---GVAFLIS--RFEAGR             | 1249 |
| GAR             | -----PLLP---G-GKN---PAVWLEDILKDE---GEGFLIR--RFEAGR            | 1236 |
| HUMAN           | -----PLLP---G-NRS---PNLWLDVLKKE---GVSFLIN--TFEGGGC            | 1229 |
| PLATYPUS        | -----PLLP---G-NKS---PASWLDLILKKE---GVSFLIS--RFEAGT            | 1231 |
| TASDEVIL        | -----PLLP---G-NRS---PSCWLDLILKKE---DISFLIN--RFEAGN            | 1234 |
| COELACANTH      | -----PLLP---G-KKS---PAAWLDEVLLKQ---GVSFLIQ--KFEGGGN           | 1237 |
| CAECILIAN       | -----PLLP---G-NKS---PSSWLDLILKKE---GISFLIS--RFEGGGS           | 1239 |
| CANARY          | -----PLLP---G-NKS---PSSWLDLILKKE---GVSFLIN--KFEGGGT           | 1228 |
| OSTRICH         | -----PLLP---G-NKS---PSSWLDLILKKE---GVSFLIN--KFEGGGR           | 1198 |
| GECKO           | -----PLLP---G-SKS---PSLWLDLILKQ---EISFLIK--KFEGGGD            | 1237 |
| TURTLE          | -----PLLP---G-NQS---PSLWLDLILKQ---GISFLIN--KFEGGGN            | 1237 |
| ALLIGATOR       | -----PLLP---G-NKS---PSSWLDLILKQ---DSSFLIN--KFEGGGN            | 1197 |
| APLYSIA         | -----PLLQ---G-VKS---QKTFFSIIHKSE---GASYFLK--RFEGGGQ           | 1234 |
| TRICHOPLAX      | -----PQLS---G-VST---IQDWKTIIGSS---SVTFIT--RFEGGGS             | 1214 |
| SOFTCORAL       | -----PLLP---E-CSS---VQIWMKKTVESD---GEDYFIL--RFECCFA           | 1227 |
| STONYCORAL      | -----PLLP---G-VNS---AADMKKTHEDH---PSSFVH--RFEGGGG             | 1245 |
| SEA ANEMONE     | -----PLLH---G-IGS---AAIWMKNTHEKH---DSFFVR--RFEGGGG            | 1232 |
| SEACUKE         | -----SVLP---G-SNS---ANVWMKNTLKEK---GASYFIN--RFEGGGG           | 1244 |
| LANCELET        | -----PLLP---R-KPS---PQAWMKERLKEK---GPDYFV--RFEGGGG            | 1252 |
| STARFISH        | -----PLLP---G-HNT---PQIWMKNTLKEK---GPDYFV--RFEGGGV            | 1252 |
| SEA_URCHIN      | -----SLLP---G-RNT---PATWMMQNTARER---GAEYFVG--RFEGGGH          | 1256 |



Supplementary Figure 6 CLUSTAL OMEGA ALL PHYLA, EXPANDED

|                 |                                                             |      |
|-----------------|-------------------------------------------------------------|------|
| PARAMECIUM      | NLPTLDE-IIQF-D-----DYLIT-TYNIHQIIRYP-----                   | 1236 |
| TETRAHYMENA     | NFFSVQEEELQF-E-----DIIDSFCTNIENFNLSLFKIQE                   | 1292 |
| STYLNCHIA       | K-----IASF-S-----DIKSK-LVDINVMGNLYSFLA                      | 1288 |
| APHANOMYCESa    | TLGNASLADAV-LL-DPVVAKRT--HDDEAVEG----PHRLFVAIAEVES-GSREA    | 1219 |
| APHANOMYCESe    | TLGNSSLIDENV-LL-DPSAMKRLSSTNADVQN----SHRVFVAAKHFAN----VD    | 1191 |
| PYTHIUM         | LGDDAKTIIFST-S--GGSTALKRK-LDELEPTGSKSSEHTTISWAKRFLEIHGAIVS  | 1278 |
| PLASMOPARA      | LGDKTRGIFEIC-GSHSKKSVKRR-HT-AEVSDTENNCCQOTLSWALLTINCDSGRNY  | 1275 |
| BREMIA          | LGEKTQVFLKFP--IKSRRENLRKK-HA-AEVNSTSFDTCEETLSWALSTLSYDGPWED | 1261 |
| AEDES           | SLLRNAE--EF-----LSASNLFAPVAVLESVS--NA                       | 1282 |
| MIDGE           | DLVNSEQKNEL-----FKHSVVLKIIFYLRGFI--NK                       | 1248 |
| BOMBUS          | DLNMQCLFDNS-N-----SQ--KDEIFNCARNFHVMMRIKI                   | 1200 |
| ANT             | KLLFTEMLFDV-D-----KQLIFFCTIRSAQFWOIT                        | 1218 |
| WHIPWORM        | KLISLEKWAHC--L-----HG--NEN----LGLALSTPFRFAC                 | 1266 |
| TRICHINELLA     | NRISMEAWNDY--L-----LN--EDP----RVKSL-----FPC                 | 1276 |
| BEEBLE          | KLSSL-----SECTTSIRYFLENVS--TI                               | 1220 |
| BARNACLE        | GALPTDRPISS-----DSVLLDNIRFLMAEAF--K--                       | 1223 |
| THRIP           | NI--PPVTLFDL-----NSSKITPALMHFLESIV--GT                      | 1217 |
| FLEA            | TLFTPTLFS-----LEESKILVTIQYFINNIV--NI                        | 1205 |
| WHITEFLY        | IIDPGLLLKA-----DSRFLMALKYFINVNG--AT                         | 1239 |
| TICK            | RLLEPKNLFEVP-K-----KP--SGLFGMVDFLEHLA--VC                   | 1250 |
| TERMITE         | ELVKPSVLWGTG-G-----LDNTSETRIFAFAVYIQHVC--HR                 | 1266 |
| DAPHNIA         | GVIDTDKCDSD-----VDFSDQFEIFAKSVERRLD                         | 1185 |
| OSTREOCOCCUS    | RHAGGEF-FPAT-----RTMHFRAAGLEERTAQVNE                        | 1273 |
| STENTOR         | GVREW--N-----GELEKKISELEMKKDED                              | 1137 |
| KLEBSORMIDIUM   | QLTVAEIVPQG-E-----VEETRPGHPVVCLRRFLESFADETD                 | 1358 |
| CLUMBOSS        | QMIGLEEIEPLR-T-----QIFSRIN-----                             | 1218 |
| MOSS            | NIISIKELLDPE-R-----DCVIHIAS--SISALQSLKLS--                  | 1301 |
| LIVERWORT       | EMITTRRELLGRT-R-----SSF-----VVSSFLHRVFTG--                  | 1313 |
| LIGNANO         | GLLDPOQLLGGC-G-----GSRLCQLRSLDFNETDPSLD                     | 1362 |
| COPEPOD         | NICSMDELEKT-----NSRIKDLTNLFLKVVYGTÉE                        | 1248 |
| GLOBOSUM        | GALTAQASIVLQ-----SDIVTSIVTFLDAAADVET                        | 1212 |
| PALUSTRIS       | GIMEASALLDQT-----QSQLLPAFVFINVYADTDV                        | 1265 |
| NEOCALLIMASTIX  | KLLESSLFPKSR-----LNCFISSIVYFINMSKKEI                        | 1324 |
| GLOMUS          | KFVPPDLITSS-----GIMFRKAINYFLENLVQNDI                        | 1349 |
| LOBOSPOR        | PGSAELLLAQLEKG-----AIMNTSTKFLHCLLFPRELKRGDM                 | 1304 |
| SYNCEPHALASTRUM | DMVTVMVVLNQP-----SSVLLDACRYLVIEVSKIVA                       | 1280 |
| FUNCTIVORUM     | GFCELL--QEG-R-----DSHSMLLCALHHRWAKTST                       | 1263 |
| HALBUM          | GFDDPVAISKDG-----SSRIISNAFVYFSEYALVQD                       | 1390 |
| DPURPUREUM      | GFIEPSALVNTG-G-----NGSTLLSTIFNVVHYALVND                     | 1377 |
| PVIOLACEUM      | GFLDPMI--G-S-----STSKILTTFPHIFNEFALLET                      | 1357 |
| AMPHIPOD        | RLVPSTVLLTHR-D-----SNLLAALQLFLNVVPEPR                       | 1329 |
| SHRIMP          | GIVPAAKLNHS-E-----LQLFSATYFINEMALLTV                        | 1288 |
| MUDCRAB         | GIVPADKLLCK-E-----SRILLASSYFLQNIATKSL                       | 1285 |
| TARDIGRADE      | VYVKADMKNRP-E-----WKVFGDCLSEFDKVVLRV                        | 1330 |
| HYDRA           | RYLPAQKIFKNG-S-----TSKLFPAIVYFIDEISLVNC                     | 1254 |
| SALPINGOBECA    | RLLTPRALLVDC-E-----MLLWGLAHLFSTFPRRS-                       | 1297 |
| SPIDER          | QLMLQMLCEEK-N-----ASLISCIKVFNALIEHLENIVKEPL                 | 1302 |
| LIMULUS         | CLLEPSSVFKA-----SIQSKGTKIFASLEFLSHFIS--                     | 1298 |
| SCORPION        | SVLKLSDIFND-----AS-NRSEKFPFSEFLKTKCIDFD                     | 1297 |
| ROTIFFER        | RLNMKSLFSTK-K-----SCIMSVETFLDKVAFSFL                        | 1321 |
| CIONA           | KILSPSIVWGE-A-----NTSCLPKYLYTYMWNISAKSA                     | 1294 |
| OCTOPUS         | NLLSPQMLQVA-E-----SNSQIKAVCYFLEYIALSDL                      | 1277 |
| CAPITELLA       | RLMSPNQLLAS-N-----NKGTHIFQVHLHMEELAQEDI                     | 1303 |
| LIMPET          | DLLTPINIFSGT-G-----SNTSKLFSELEYFLSNISLRSI                   | 1294 |
| SCALLOP         | NLLTPVDVFGVG-G-----MNQTNVFKAAFYVDNIALADI                    | 1326 |
| LINGULA         | NLLRPEDVFTGG-H-----SSCIVLVSLFLSSLALKDI                      | 1312 |
| OYSTER          | SLLNPDIDFSGE-G-----RKQSKLLQAMQHFLSQVVMEDM                   | 1300 |
| SNAIL           | GLLSPAKMFESS-G-----FKGTRVFPSSLOQVTEMALGDL                   | 1307 |
| SPONGE          | QYVSPREIFST-S-----SSNLFKSIDHFLKCIALVGI                      | 1305 |
| PRIAPULA        | KLLOPTALFAGG-T-----GKREERTCFAMVSDMRPSGEE--                  | 1323 |
| DANTO           | RCLQQRILGTC-E-----KSSFLPAVHFLETLSMQDI                       | 1314 |
| ESHARK          | AMVKPSLELGT-Q-----ETGFMKAMFLETTLARHDI                       | 1312 |
| BHARK           | HLVKPSKIMGTS-E-----NSSFLKALNFLETTLARHDI                     | 1314 |
| XENOPUS         | RFLKANTVGLGN-A-----EKSSFLKAFFLETLSMNI                       | 1331 |
| STERLET         | HLVKPHEVLGAK-V-----QSGFLKALFLETTELAVQDI                     | 1328 |
| GAR             | HFVKPQILGTQ-E-----KSSFLKALGFLETTLAQDI                       | 1315 |
| HUMAN           | RTVGLQVLGTE-A-----QSSLLKAVAFLETESIAMHDI                     | 1306 |
| PLATYPUS        | KTVKAHEILGTQ-A-----KSSFLRAISFLETIERIAFHI                    | 1310 |
| TASDEVIL        | RAIKAQEILGTQ-A-----KSSFLKAVGFLETIALHDI                      | 1313 |
| COELACANTH      | RMINPREIFGTT-S-----VSGFLRAVEFLETTRLATQDI                    | 1316 |
| CAECILIAN       | RAIKPNEILSTT-E-----QSSFLRTECFLETQKLEHDI                     | 1318 |
| CANARY          | QMIKPDEVILGN-E-----SSFLKAVQFLETITALHDI                      | 1307 |
| OSTRICH         | RMIKPHEILGN-E-----RSSFLKAVRFLETITALHDI                      | 1277 |
| GECKO           | GMIKPHEIVATN-T-----ESSFMSVVEFLETALKLDV                      | 1216 |
| TURTLE          | GMIKPHEILGTQ-K-----RSSFLRAVEFLETITALHDI                     | 1316 |
| ALLIGATOR       | RMEKPNVLTGN-----SSFLRAVEFLETITALHDI                         | 1274 |
| APLYSIA         | DLMTLSQLPTGK-G-----SEMCMKPSLEFLRSVAFQDI                     | 1316 |
| TRICHOPLAX      | KMMSPEQIGDK-A-----QLGSCKIFGSEFLFKLCKLHSL                    | 1292 |
| SOFTCORAL       | RLLTPSSIIFQG-----KTTSVLWRTLTYFLEKLSLNGI                     | 1303 |
| STONYCORAL      | HLLSPSVVFTSS-E-----DNEMPSVLLVSLKFLSHLAMFGI                  | 1326 |
| SEA ANEMONE     | QLLPADLIRS-----KYSSVLTSLSYFLSNLAMLGI                        | 1308 |
| SEACUKE         | RLLTPTPSS-----SNLTKSLQFLDDFAQHD                             | 1318 |
| LANCELET        | RFLSPSDVLSGS-G-----KKPSQLFALFLETKLALSDI                     | 1333 |
| STARFISH        | KLLSPSVVYAT-A-----RRPSVLFQSLQFLSSLSLDDI                     | 1333 |
| SEA_URCHIN      | SLLTPAAVFKTI-K-----EGKSVLFTQIDSFMVQAQ-YDL                   | 1333 |

Supplementary Figure 6 CLUSTAL OMEGA ALL PHYLA, EXPANDED

|                 |                                                           |      |
|-----------------|-----------------------------------------------------------|------|
| PARAMECIUM      | -----IVKNQKHLMDSEPLFDMIMTLTQDN-----FNPSQNFQNDAGNIDNWLATS  | 1283 |
| TETRAHYMENA     | -----SVLKSDGLLME-----ILLDDAVID-----I                      | 1314 |
| STYLNONCHIA     | DHIVIKFVKNERKSLD-----KLLICKEDKEILTKSRMVLITQPLR-----YL-DQL | 1334 |
| APHANOMYCEs     | -----PP                                                   | 1221 |
| APHANOMYCEse    | -----EP                                                   | 1193 |
| PYTHIUM         | -----KTTTIER                                              | 1285 |
| PLASMOPARA      | -----RSKRSRW                                              | 1282 |
| BREMIA          | -----SSKRSD                                               | 1268 |
| AEDES           | SM-----FELMT-----VIRPSIVEDSYASIEF-----R-VCTDK             | 1311 |
| MIDGE           | DI-----IDIVE-----LANESHINTSQMNR-----R-MYNRN               | 1277 |
| BOMBUS          | EN-----K-----EDN-----LILLSKE                              | 1213 |
| ANT             | ES-----S-AEPTA-----TTIKSR                                 | 1233 |
| WHIPWORM        | VA-----LSWPS-----S-----DINPEP-----T-----DNR               | 1284 |
| TRICHINELLA     | SL-----DLVNS-----I-----VIGRHP-----PNLSKAQ                 | 1297 |
| BEEBLE          | TL-----DEAPA-----IIEP-----KMW-----M-----FTTPE             | 1240 |
| BARNACLE        | -----PS-----F-----E-----DSAEAGR-----WA-----               | 1236 |
| THRIP           | PI-----NQ-PS-----L-----WRPKA                              | 1229 |
| FLEA            | DP-----ADLPA-----FLDA-----SVGMMIS-----IKD-----            | 1226 |
| WHITEFLY        | SC-----QHFIE-----ILYS-----DWSAIEP-----QLD-----            | 1260 |
| TICK            | ES-----PQ-----E-----LLRD-----VESEP-----LTSSK              | 1269 |
| TERMITE         | DA-----SSVTC-----LLST-----DTKDVLE-----ITPWE               | 1289 |
| DAPHNIA         | -----QELPTA                                               | 1191 |
| OSTREOCOCCUS    | -----ISRE                                                 | 1277 |
| STENTOR         | -----I                                                    | 1138 |
| KLEBSORMIIDIUM  | -----DSAL-----EAQL-----RSLTPSE                            | 1373 |
| CLUBMOSS        | -----OP-----VEELPAR                                       | 1227 |
| MOSS            | -----QDS-----IHQP-----LDLTPGE                             | 1315 |
| LIVERWORT       | -----HDS-----NSEW-----SSVTPGE                             | 1327 |
| LIGNANO         | -----PGRLLASASVS-----AS-----SAY-----SNSISEI               | 1385 |
| COPEPOD         | -----IEPEG-----MDESGAE-----GK-----DPLSPGE                 | 1269 |
| GLOBOSUM        | -----L-----NTAF-KS                                        | 1219 |
| PALUSTRIS       | -----D-----GTVPAA                                         | 1273 |
| NEOCALLIMASTIX  | RM-----DDNNL-----IFYSVN-----E                             | 1338 |
| GLOMUS          | EY-----LTPDAMEIDDGEY-----FIKNVG-----SE-----NILTPAQ        | 1380 |
| LOBOSPOR        | -----V-----TTLTPSE                                        | 1312 |
| SYNCEPHALASTRUM | -----S-----NDFGAFD                                        | 1288 |
| FUNCTIVORUM     | -----DD-----AVF-----ARSTPSE                               | 1275 |
| HALBUM          | -----SH-----PAM-----ASLTPRE                               | 1402 |
| DPURPUREUM      | -----NKSYE-----QML-----SSMTPKE                            | 1392 |
| PVIOLACEUM      | -----DK-----L-----SLF-----SSMTPSE                         | 1370 |
| AMPHIPOD        | -----H-----VL                                             | 1332 |
| SHRIMP          | -----SEYMK-----NHDAF-----QN-----AVATPYE                   | 1307 |
| MUDCRAB         | -----SQYVK-----DNIRVSE-----TG-----AIGSPLE                 | 1306 |
| TARDIGRADE      | -----TDPAS-----LLA                                        | 1338 |
| HYDRA           | -----KNMLM-----KF-----M-----QDILPSE                       | 1269 |
| SALPINGOECA     | -----E-----LK-----RHDTPAE                                 | 1307 |
| SPIDER          | -----T-----AL-----ISKHYIE-----ES-----DVFPGE               | 1321 |
| LIMULUS         | -----VEIIA-----AM-----DLLSPKE                             | 1312 |
| SCORPION        | -----QRVQA-----FPTHEVS-----KK-----QIFSPKE                 | 1318 |
| ROTLFER         | -----QNFLS-----HNYTE-----AH-----ILFSPNE                   | 1340 |
| CIONA           | -----EQLTS-----PSA-----DS-----KGLTPKE                     | 1311 |
| OCTOPUS         | -----KTLTK-----NA-----DY-----LPFTPKE                      | 1293 |
| CAPITELLA       | -----SAAVK-----LFPKVAD-----GS-----SIFTPRE                 | 1324 |
| LIMPET          | -----DEVSK-----LFKES-----S-----V-----EYFTPPE              | 1313 |
| SCALLOP         | -----ETVAN-----LFPNOPE-----T-----TFFTPRE                  | 1346 |
| LINGULA         | -----EAAAD-----LFTKGLD-----R-----KIFTPWE                  | 1332 |
| OYSTER          | -----DEVGK-----MFRHEPL-----T-----DVYTPKE                  | 1320 |
| SNAIL           | -----SVAAK-----QFORKAE-----A-----VFFTPKE                  | 1327 |
| SPONGE          | -----EGVNV-----SPEVA-----MATSIHE                          | 1322 |
| PRIAPULA        | -----R-----RRR-----RR-----WADR-----RHVHPGE                | 1340 |
| DANTO           | -----QAARA-----CFRLGNA-----GQ-----SHFSPRE                 | 1335 |
| ESHARK          | -----TAAEE-----CFTLGVK-----G-----VLFSPRE                  | 1332 |
| BSHARK          | -----TAAEE-----SPAYGIK-----G-----ILFSPRE                  | 1334 |
| XENOPUS         | -----KAAEQ-----CMG-----SK-----S-----SVFSPHE               | 1349 |
| STERLET         | -----SAAEL-----CFVSGPK-----G-----ALFSPKE                  | 1348 |
| GAR             | -----SAAER-----CFSSGSE-----G-----SLFSPRE                  | 1335 |
| HUMAN           | -----IAAEK-----CFGTGAA-----G-----NRTSPQE                  | 1326 |
| PLATYPUS        | -----TAAEQ-----CFGTGSK-----G-----SMFSPQE                  | 1330 |
| TASDEVIL        | -----RAAEK-----CFGTGIK-----G-----NVFSPQE                  | 1333 |
| COELACANTH      | -----TAAEQ-----CFTAGSK-----D-----TMFSPRE                  | 1336 |
| CAECILIAN       | -----TAAEQ-----CFRTGPS-----G-----NIASPOE                  | 1338 |
| CANARY          | -----HAAEQ-----CFDSSK-----G-----SMFSPQE                   | 1327 |
| OSTRICH         | -----QAAEQ-----CFDCGLK-----G-----SVFSPQE                  | 1297 |
| GECKO           | -----SGAEQ-----CFWTASK-----G-----NLFSPQE                  | 1336 |
| TURTLE          | -----SAAER-----CFDTGSK-----G-----NMFSPQE                  | 1336 |
| ALLIGATOR       | -----HAAEQ-----CFYTKSK-----D-----NVFSPQE                  | 1294 |
| APLYSIA         | -----EGVSK-----LFPSS-----KV-----TVFTPWE                   | 1335 |
| TRICHOPLAX      | -----DETVK-----LLYSK-----STL-----QLFTPPE                  | 1312 |
| SOFTCORAL       | -----EKAFE-----CFPTTSDG-----VNT-----HAFSPSE               | 1326 |
| STONYCORAL      | -----TEATS-----CFRTGPS-----RGMG-----DIFTPKE               | 1349 |
| SEA ANEMONE     | -----QAAIK-----CFPKT-----THIT-----DVATPKE                 | 1329 |
| SEACUKE         | -----EHVAL-----SL-----AQHR-----GIFTPWE                    | 1336 |
| LANCELET        | -----DAAAR-----CFESHG-----AA-----TLFTPPE                  | 1353 |
| STARFISH        | -----TGAAR-----GIEYGGSK-----SAFH-----QVFTPPE              | 1358 |
| SEA_URCHIN      | -----FAFAK-----GC-----GSME-----TAFTPPE                    | 1351 |

Supplementary Figure 6 CLUSTAL OMEGA ALL PHYLA, EXPANDED

|                 |                                                             |      |
|-----------------|-------------------------------------------------------------|------|
| PARAMECIUM      | PEKLVBEQLITTFERYVKF-----VRTF---HIDVE                        | 1310 |
| TETRAHYMENA     | QENQYQAVINLFIKICEFMSLLSNDILNFTTFL-----DVLN---NITLE          | 1356 |
| STYLNCHIA       | DEESLLAHADLFQKNCNFNLIH-----F--C-----VQIM---VIPLI            | 1367 |
| APHANOMYCEsa    | SMAR---NRAFGLVCNVALALEHPTV-VPELHRHVM-----NVL--TGTT--D       | 1262 |
| APHANOMYCEsa    | TQAR---NRAFEGVCKLVTLAINSETS-LPLLSKQVD-----Q-S--GLVD--N      | 1233 |
| PHYTIUM         | DEQY---KTRHQLLEAFIQSAEALSNL-LLKNGRSTM-----SSN--VVSEFQL      | 1328 |
| PLASMOPIARA     | TEAY---LSVLVSLCNFVKAIMSHGNI-LLRETLDDL-----NQ-----           | 1317 |
| BREMIA          | IAAY---MSVVISICTYVKSMMENEM-ILCNSIDVD-----NR-----            | 1303 |
| AEDDES          | IIKFNLLKCTIIVRIVDLLSLLPLRCC-R-S-----VP--DAFWDSA             | 1350 |
| MIDGE           | VDNI SVTRSLILVKIIDLFTTISIEIDEV-S-E-----FL--TKY--QF          | 1314 |
| BOMBUS          | TELODTLQCKAAILNIFDPQILLNFPDGN-FI-----PDPFFNK                | 1250 |
| ANT             | LEQLOVLRVLMTFLNFQVLLDYN-I-L-----PESLWDE                     | 1269 |
| WHIPWORM        | SOLMKRRCA-FLSLLDFLTVFVQYNE-NPED-----QP--AAVVEDR             | 1324 |
| TRICHINELLA     | RNRNKRCKRSFVALCKLIAALISQNL-NNYQ-----GF--LKLLYP              | 1338 |
| BEEBLE          | KLHFDKQRSQAVIKILQLPTIC-----E-----TI--TAFY-TS                | 1271 |
| BARNACLE        | --PVRRLCTALVRALAVIEALRAAPR-AV-----TDIW-SL                   | 1270 |
| THRIP           | MEQFNYAKCTIIVRMIDFPTAVLDIGQG-SK-----L--SPFWSS-              | 1266 |
| FLEA            | KEKFIKFTYNTFIMILTFVSKILFCDDA-DE-L-----IT--SFSWLN-           | 1265 |
| WHITTEFLY       | SNLYSSVATEVLAQLKFK---LTIISHN-SLKE-----EF--FCEILKE           | 1297 |
| TICK            | LSAFNLAKCSVTIIRLNFNLAWMETSHG-SMAS-----VA--SPFWRSR           | 1310 |
| TERMITE         | AESFDRTKCFVIRLLDMISTVLKSGEA-GC-----L--PHSLNLN               | 1327 |
| DAPHNIA         | EVPLRDTTSESFLAWLSFLEYLTKSQNRKLR-----ALL-ALIL-DDDQGVV        | 1226 |
| OSTREOCOCCUS    | KNAVQNHLYVTRERIPALDDTILKSALRGAEDK-----M-SAV--TMDLFS         | 1324 |
| STENTOR         | TEAL-----RFLKVLKLYVEFPH-----POVQV                           | 1462 |
| KLBSORMIDIUM    | RESFHRTRCSTIRMGVLSFVQVKSGLCESTLASVGVKNP---SAQVQVQWTDVVPVETD | 1461 |
| CLUMBOSS        | CI-FLKENDSAIHLMLAFKDIQMGIGASEPSSVETPSRDD---KEKLAELILPHYD    | 1282 |
| MOSS            | QDELQKRYEATTHLMKFCSQVINAQSGYAEIE-----DLALRTIFMPDQSR         | 1362 |
| LIVERWORT       | RESHRKLVCGAVHLLGYIRQIVDSELGTRETGVF-LPRRVDKGAVDMQLEGLLFPSEP  | 1386 |
| LIGNANO         | RASAVTIRCOLIVRTAALLQLAGKQD-CLKD-----LL--QKGENSN             | 1426 |
| COPEPOD         | RRRLEKKGCTIIRLFTFLTSVLKLEKGRNLLS-----AQA                    | 1305 |
| GLOBOSUM        | LDAFNNRNVFVLKVVFEVFNVSFVGTAVLAV-----DK-KHW--SPIFECE         | 1260 |
| PALUSTRIS       | KHQYNQKRSITAKAVDFLLSLQRDGE-----NAKKLE--EARIWSS              | 1315 |
| NEOCALLIMASTIX  | ISKLNMRDYITPKIFNFKVLEIE--NSMDIRK-----TLENLK--EHKVFNS        | 1382 |
| GLOMUS          | KLQWLTRKIQIEHLLIGFNVLFKEDT---PN-----NVESLW--NSNINGK         | 1422 |
| LOBOSPOR        | RQQIMDQMLTARKAISFVSVIVASQSGRSDTK-----FIAQLQ--ASGLLDS        | 1358 |
| SYNCEPHALASTRUM | RRRLNALYATYRACFLTCLASSNQSDAYA-----M--SAV--TMDLFS            | 1332 |
| FUNCTIVORUM     | MICYHQVNTILLSLGRFSLQMKLSTK-D-N-----QIISQ                    | 1310 |
| HALBUM          | IDQFMTLKQCTLEHYVALPSMLLEKYNV-SQVM-----FTGGI                 | 1439 |
| DPURPUREUM      | IDLFNRMKQVITNLFGLVILLLEKYNF-QEVI-----EISGQ                  | 1429 |
| PVIOLACEUM      | LEHYNRKCSVIMNLFGLFILLMEKHNV-EQVM-----SYGGI                  | 1407 |
| AMPHIPOD        | SSSKQVNSCTIIVRLMDFMTVMKDKET-SQSL-----LA--SIFCP              | 1371 |
| SHRIMP          | TEATAKAKCTIIVRLDFVSVVLQEGPK-VASL-----LS--QHSVWSA            | 1348 |
| MUDCRAB         | YEASNKIKCTIIVRLDFVSVVLQEGPK-SVQL-----LN--EYSIFTA            | 1347 |
| TARDIGRADE      | TESLRTIIGGLIRLRLDLMVTHTYGR-DGIA-----VL--PPVVASK             | 1379 |
| HYDRA           | CDTYDRKCTIIVRIIYIISLTLDEE---LWK-----ANTMKDI--GDKMFSN        | 1312 |
| SALPINGOBECA    | AAAYRYLKCTVMVRVLDVVRTVLRVDAS-----AL--PTKLWSG                | 1344 |
| SPIDER          | TLKYNRLKCTVIRLLNFTSVFATDAK-WFHD-----KF--LKVWNS              | 1362 |
| LIMULUS         | KGEFKRVKCTIIVRLNFTVLIQNFSK-ELSS-----CT--PQSLWMS             | 1353 |
| SCORPION        | KDEYLRNCFIIVRLINFTVIENHIL-QLN-----TI--PSTFWSI               | 1358 |
| ROTIFFER        | IDEYNGLKCTVMIRLMDFLETIFANYSK-ESLD-----VI--PMSLWMS           | 1381 |
| CIONA           | ISSFNDLKPVTVMIRIMEFVSALLKYNQ-EAIK-----VV--PKSMWEO           | 1352 |
| OCTOPIUS        | EEVFNRRKCTIIVRISFSLTVLKKCKDAENSS-----VI--PNEVWTP            | 1335 |
| CAPITELLA       | REDYNQKCTIIVRILSFICTMFGNYKT-ESLK-----VI--PTSFWSS            | 1365 |
| LIMPET          | IEDFNRRKCTIIVRITNFLSVLIGKYPK-DAIK-----VI--PGTVWSD           | 1354 |
| SCALLOP         | IDEFNREKCTIIVRILNLFVSVVATSGAKDLNK-----AV--HPEIWSG           | 1388 |
| LINGULA         | VEEYNRKCTIIVHLLDFLCSSTISKSGS-HLEQ-----VV--PSNIWCP           | 1373 |
| OYSTER          | RDEYNRKCTAVRVLNFFCVLVARSPS-SVKK-----LL--PSEILGK             | 1361 |
| SNAIL           | KDDYNKCTIIVRIMNFTVLIRARYPS-EAFK-----VI--PQTLFCD             | 1368 |
| SPONGE          | RGEYQRNKCTIIELLTFIELLTKHTS-ETVS-----FEYV--PDSLWSQ           | 1365 |
| PRIAPULA        | MEKYNRSKCMVIRAMDLSILLMMAS---LQ-----VI--PDSTWSM              | 1378 |
| DANTO           | TEQYNSKCSIIVRMLEFSTMVLRKCPQ-DLWK-----LM--EKDFVNS            | 1376 |
| ESHARK          | REEYNYKCTIIVRIMEFACLILELQO-DWK-----VL--EKDLLNS              | 1373 |
| BSHARK          | REDYNKCTIIVRIMEFVSMVLEDCOQ-DPLK-----ML--EKYLLNS             | 1375 |
| XENOPUS         | IEAYNSKCTIIVRIMEFITMFDICQO-DSLK-----IL--ENSVFNE             | 1390 |
| STERLET         | REDYNSKGTIIVRMEFVSMVLENCQO-EFWK-----LL--EQNLINP             | 1389 |
| GAR             | REDYNSKGTIIVRMEFVSMVLDKCSQ-DLWK-----VL--ERDILHL             | 1376 |
| HUMAN           | GERYNSKCTIIVRIMEFMTLLNTSP--EGWK-----LL--KKDLCNT             | 1366 |
| PLATYPUS        | REEYNSKCTIIVRIMEFATMLLNTYQ--DTWK-----LL--EKDLLNA            | 1370 |
| TASDEVIL        | REEYNSKCTIIVRIMEFSSMLLNTYQ--DVK-----LL--EKDLLNA             | 1373 |
| COELACANTH      | REDYSKCTIIVRILTFVSMVLEKCPQ-DLWK-----VL--EKDLLTP             | 1377 |
| CAECILIAN       | REDYNSKCTIIVRIMEFVSMILENCQO-DFWR-----LL--EKDLLAN            | 1379 |
| CANARY          | RDYNSKCTIIVRILEFVTVILEMCOQ-DFWK-----LL--EKELLNA             | 1368 |
| OSTRICH         | REVYNSKCTIIVRSMFVSMVLESCQO-DFWK-----LL--EKELLNA             | 1338 |
| GECKO           | KEDYNSKCTIIVRIMVFSMILETCOQ-DFWK-----LL--ERELLNK             | 1377 |
| TURTLE          | REEYNSKCTIIVRIMAFVSMILETCOQ-DFWK-----LL--EKELLNA            | 1377 |
| ALLIGATOR       | REEYSKCTIIVRILRFVSMILETCOQ-DFWK-----LL--EKELLNL             | 1335 |
| APLYSIA         | KDEFNRKCTIIVRILNLFSLILARHSQ-EVLKVK---H---SCLKLVV--PASLWCE   | 1385 |
| TRICHOPLAX      | IEEYNMCKCTIIVRILNLFVSMILETCOQ-SIIE-----GI--PROIWSQ          | 1353 |
| SOFTCORAL       | IQEYNRKCTIIVRIIAFITLLQMNK-EYLE-----IV--PSELWTG              | 1367 |
| STONYCORAL      | IDDYFRAKCTIIVRILNFTLILLQDFPQ-ETLK-----TL--PPEFWE            | 1390 |
| SEA ANEMONE     | MDEYNRVKCTIIVRIMNFTVLLQAYPD-QGFK-----IV--PTSLWSD            | 1370 |
| SEA CUCUR       | QERYNSKCTIIVRIMDFLTVLLGNFSP-EAMK-----VL--PSSFWVG            | 1377 |
| LANCELET        | TEDYNSKCTIIVRIMDFLTVLLGAFPP-DAYK-----VV--PDVWKS             | 1394 |
| STARFISH        | SEYNYQKCTIIVRILDFLTVLLENYAS-DAVK-----VI--PKSIWQD            | 1399 |
| SEA URCHIN      | EEDYNRKCTIIVRILFYMGAMLSHTK-EALE-----VI--PSKLTWG             | 1392 |

Supplementary Figure 6 CLUSTAL OMEGA ALL PHYLA, EXPANDED

|                 |                                                                                                                                                                                                                  |      |
|-----------------|------------------------------------------------------------------------------------------------------------------------------------------------------------------------------------------------------------------|------|
| PARAMECIUM      | QYYN-LS---IGI <b>I</b> ---IRPSYFLKGIQLDLYFGQVDSVVNE-----AQ---                                                                                                                                                    | 1347 |
| TETRAHYMENA     | NKYS-IF---LQML---LKPNNHILRGMNIDIFLTKSELYPEK-----                                                                                                                                                                 | 1391 |
| STYLNCHIA       | HQ-----LQVL---VE <b>I</b> QELERQLR---NQSELLLRK-----LVAIK                                                                                                                                                         | 1398 |
| APHANOMYCESa    | RWWD-LV---VLA <b>A</b> ---VDPKAA <b>L</b> FEL---S-----T-----                                                                                                                                                     | 1285 |
| APHANOMYCESe    | KFLE-FV---VQAR---IEPRV <b>L</b> KEF---S-----                                                                                                                                                                     | 1255 |
| PYTHIUM         | EGRD-DVIADLLSVIGLL <b>V</b> G-EGSGSL---KLL---DK-----                                                                                                                                                             | 1360 |
| PLASMOPARA      | SLRD-SVVGKLV <b>E</b> VI---FHRADL <b>L</b> HNA---SSF---RA-----                                                                                                                                                   | 1347 |
| BREMIA          | SFRR-AVTERILQ <b>A</b> L---LR <b>T</b> SM <b>L</b> HD <b>T</b> ---SLV---GK-----                                                                                                                                  | 1333 |
| AEDDES          | AVSQ-FV---VDLV---YQ <b>O</b> KL <b>E</b> DFDK---SECRETMEQ-----                                                                                                                                                   | 1379 |
| MIDGE           | EIFD-IT---KQ <b>L</b> I---FL <b>O</b> R <b>L</b> E <b>S</b> YK---TRN-SLIK-----                                                                                                                                   | 1342 |
| BOMBUS          | DFFE-LI---AK <b>C</b> I---M <b>C</b> Q <b>V</b> I <b>F</b> DLK---NLE-ITEE-----                                                                                                                                   | 1278 |
| ANT             | PLSA-LT---M <b>K</b> S <b>L</b> ---M <b>N</b> PR <b>V</b> I <b>F</b> DK---NIQ-MDK-----                                                                                                                           | 1297 |
| WHIPWORM        | NIWC-TV---IK <b>G</b> L---F <b>E</b> PE <b>S</b> M <b>F</b> SDH---AVE-TEDL-----                                                                                                                                  | 1352 |
| TRICHINELLA     | NTWN-AP---LK <b>V</b> A---C <b>D</b> PK <b>S</b> L <b>E</b> FR <b>L</b> Y---SKQ-FF <b>E</b> C-----                                                                                                               | 1366 |
| BEEBLE          | HLWN-LL---V <b>N</b> F <b>V</b> ---F <b>N</b> R <b>O</b> S <b>L</b> E <b>F</b> EC <b>F</b> ---QPQ-DDDN-----                                                                                                      | 1299 |
| BARNACLE        | PVCD-TV---A <b>A</b> AV---L <b>A</b> PA <b>E</b> L <b>E</b> FD <b>V</b> S---E <b>A</b> E-V <b>V</b> RE-----                                                                                                      | 1298 |
| THRIP           | NFWK-LL---I <b>N</b> C <b>C</b> ---V <b>W</b> PS <b>N</b> L <b>E</b> FD <b>S</b> T---SKN-VEEN-----                                                                                                               | 1294 |
| FLEA            | RLSN-VV---V <b>N</b> C <b>L</b> ---F <b>C</b> Q <b>D</b> L <b>E</b> FN <b>V</b> E---NNY-IG <b>Q</b> N-----                                                                                                       | 1293 |
| WHITEFLY        | PLWK-LI---V <b>L</b> C <b>T</b> ---L <b>R</b> P <b>S</b> T <b>V</b> ARG <b>V</b> ---C <b>S</b> E-T <b>S</b> L <b>K</b> -----                                                                                     | 1325 |
| TICK            | AFWR-CT---V <b>V</b> C <b>V</b> ---L <b>S</b> P <b>S</b> D <b>A</b> L <b>F</b> DL <b>T</b> ---D <b>L</b> E-V <b>A</b> N <b>Q</b> -----                                                                           | 1338 |
| TERMITE         | QLWQ-LI---V <b>A</b> C <b>V</b> ---L <b>H</b> P <b>S</b> L <b>E</b> FD <b>L</b> Y---N <b>T</b> E-V <b>T</b> D <b>G</b> -----                                                                                     | 1355 |
| DAPHNIA         | -----T <b>L</b> ---I <b>R</b> T <b>C</b> ---L <b>L</b> P <b>S</b> R <b>L</b> E <b>F</b> SD <b>A</b> ---S <b>G</b> S-Q <b>O</b> Q <b>F</b> -----                                                                  | 1250 |
| OSTREOCOCCLUS   | NACK-VM---S <b>A</b> A <b>T</b> ---F <b>F</b> P <b>O</b> N <b>L</b> E <b>Q</b> E---A <b>S</b> K-K <b>S</b> I <b>T</b> -----                                                                                      | 1352 |
| STENTOR         | D-----F <b>L</b> ---L <b>K</b> F <b>L</b> ---L <b>T</b> P <b>K</b> I <b>E</b> FP <b>E</b> G---A <b>S</b> -Q <b>E</b> F <b>I</b> -----                                                                            | 1197 |
| KLEBSORMIDIUM   | SFHR-LM---C <b>L</b> L <b>L</b> ---L <b>R</b> R <b>R</b> L <b>E</b> FP <b>V</b> S---D <b>L</b> K-Q <b>B</b> F <b>I</b> -----                                                                                     | 1459 |
| CLUBMOSS        | KLQH-LL---C <b>L</b> L <b>L</b> ---F <b>K</b> P <b>S</b> E <b>M</b> E <b>T</b> TP <b>P</b> ---E <b>S</b> S-G <b>A</b> E <b>E</b> -----                                                                           | 1310 |
| MOSS            | YFQQ-LL---C <b>L</b> V <b>L</b> ---L <b>K</b> P <b>R</b> O <b>L</b> E <b>L</b> V <b>I</b> S---E <b>L</b> Q-R <b>A</b> Q <b>D</b> -----                                                                           | 1390 |
| LIVERWORT       | DFPE-LM---C <b>L</b> A <b>L</b> ---L <b>R</b> P <b>R</b> O <b>L</b> E <b>V</b> A <b>T</b> ---D <b>S</b> H-H <b>A</b> E <b>E</b> -----                                                                            | 1414 |
| LIGNANO         | GLWT-AL---A <b>R</b> A <b>T</b> ---L <b>R</b> P <b>O</b> L <b>L</b> E <b>F</b> DA <b>Q</b> ---D <b>P</b> S-L <b>M</b> A <b>K</b> -----                                                                           | 1454 |
| COPEPOD         | EFAV-LL---T <b>O</b> T <b>I</b> ---M <b>E</b> PE <b>K</b> L <b>E</b> FN <b>L</b> K---S <b>N</b> Q-DE <b>D</b> Q-----                                                                                             | 1333 |
| GLOBOSUM        | NFYR-ML---A <b>L</b> T <b>M</b> ---F <b>A</b> PE <b>K</b> L <b>E</b> FD <b>V</b> G---L <b>D</b> A-T <b>K</b> D <b>E</b> -----                                                                                    | 1288 |
| PALUSTRIS       | KFPH-II---A <b>T</b> C <b>V</b> ---F <b>R</b> P <b>H</b> E <b>L</b> E <b>F</b> A <b>I</b> E---S <b>Q</b> E-V <b>K</b> R <b>N</b> -----                                                                           | 1343 |
| NEOCALLIMASTIX  | DFID-LL---N <b>C</b> S <b>L</b> ---Y <b>N</b> I <b>R</b> L <b>L</b> E <b>N</b> D <b>L</b> E---E <b>K</b> D-T <b>O</b> I <b>S</b> -----                                                                           | 1410 |
| GLOMUS          | QFYK-LL---G <b>N</b> C <b>T</b> ---L <b>R</b> P <b>N</b> I <b>E</b> L <b>D</b> O---L <b>P</b> D-N <b>I</b> V <b>K</b> -----                                                                                      | 1449 |
| LOBOSPOR        | RFFA-VL---A <b>A</b> C <b>T</b> ---F <b>N</b> P <b>D</b> S <b>I</b> E <b>S</b> -D <b>O</b> ---L <b>L</b> K-G <b>S</b> E <b>E</b> -----                                                                           | 1385 |
| SYNCEPHALASTRUM | DLSR-LL---A <b>H</b> I <b>V</b> ---L <b>L</b> PE <b>Q</b> L <b>E</b> V <b>V</b> Q <b>O</b> ---A <b>E</b> Q-G <b>A</b> L <b>S</b> -----                                                                           | 1360 |
| FUNCTIVORUM     | HYLT-LV---L <b>T</b> S <b>I</b> ---L <b>S</b> P <b>H</b> M <b>L</b> E <b>F</b> T <b>S</b> ---D <b>I</b> N-Q <b>I</b> D-R <b>M</b> R <b>S</b> T <b>A</b> V <b>Q</b> V <b>I</b> V <b>D</b> I <b>H</b> R <b>C</b> N | 1354 |
| HALBUM          | QLLR-VV---G <b>V</b> S <b>L</b> ---L <b>T</b> R <b>A</b> V <b>V</b> E <b>R</b> T <b>I</b> ---D <b>N</b> N-M <b>N</b> A <b>S</b> N <b>S</b> G-----                                                                | 1470 |
| DUPURPUREUM     | PFIQ-LL---T <b>K</b> S <b>L</b> ---M <b>D</b> P <b>O</b> S <b>I</b> E <b>F</b> T <b>N</b> Y---I <b>D</b> E-K <b>V</b> L-----E <b>L</b> Q <b>S</b> S <b>A</b>                                                     | 1462 |
| PVIOLACEUM      | SFIH-LL---V <b>L</b> S <b>M</b> ---M <b>D</b> P <b>K</b> L <b>E</b> FD <b>T</b> I---S <b>P</b> D-N <b>M</b> I <b>G</b> Q <b>E</b> S <b>K</b> S <b>S</b> ---E <b>D</b> V <b>S</b> D <b>Q</b> S                    | 1449 |
| AMPHIPOD        | NFRK-IF---V <b>T</b> A <b>V</b> ---L <b>E</b> P <b>A</b> S <b>V</b> E <b>F</b> D <b>L</b> R---D <b>T</b> E-V <b>N</b> E <b>K</b> -----E <b>D</b> V <b>S</b> D <b>Q</b> S                                         | 1399 |
| SHRIMP          | TMFS-LL---T <b>C</b> C <b>T</b> ---L <b>D</b> P <b>A</b> S <b>V</b> E <b>F</b> D <b>I</b> K---D <b>T</b> E-V <b>S</b> K <b>H</b> -----                                                                           | 1376 |
| MUDCRAB         | EMYG-LI---L <b>Q</b> C <b>V</b> ---L <b>N</b> P <b>S</b> S <b>V</b> E <b>F</b> D <b>V</b> K---D <b>T</b> E-V <b>T</b> K <b>H</b> -----                                                                           | 1375 |
| TARDIGRADE      | SFAD-II---V <b>R</b> M <b>V</b> ---L <b>D</b> P <b>K</b> A <b>V</b> E <b>F</b> D <b>L</b> H---E <b>V</b> ---D <b>R</b> -----                                                                                     | 1404 |
| HYDRA           | NFLK-VI---V <b>Y</b> C <b>M</b> ---V <b>Y</b> P <b>Q</b> C <b>L</b> E <b>F</b> Q <b>V</b> S---D <b>L</b> E-V <b>L</b> E <b>K</b> -----                                                                           | 1340 |
| SALPINGOEBEA    | ECLD-FI---C <b>K</b> A <b>V</b> ---L <b>M</b> P <b>I</b> M <b>L</b> E <b>F</b> D <b>P</b> S---D <b>P</b> E-I <b>E</b> E <b>K</b> -----                                                                           | 1372 |
| SPIDER          | NLWE-LI---L <b>L</b> L <b>V</b> ---V <b>N</b> P <b>T</b> S <b>L</b> E <b>F</b> E <b>M</b> T---D <b>P</b> E-I <b>A</b> T <b>K</b> -----                                                                           | 1390 |
| LIMULUS         | SLWK-CI---S <b>L</b> C <b>V</b> ---L <b>D</b> P <b>T</b> S <b>I</b> E <b>F</b> N <b>M</b> T---D <b>L</b> E-I <b>M</b> T <b>O</b> -----                                                                           | 1381 |
| SCORPION        | NFWN-CI---Y <b>S</b> S <b>V</b> ---L <b>N</b> E <b>K</b> L <b>E</b> FP <b>D</b> M <b>T</b> ---D <b>T</b> Y-I <b>F</b> N <b>Q</b> -----                                                                           | 1386 |
| ROTIFFER        | NFEG-LV---I <b>M</b> S <b>L</b> ---L <b>M</b> P <b>T</b> S <b>L</b> E <b>F</b> S <b>L</b> K---N <b>L</b> E-I <b>F</b> S <b>N</b> -----                                                                           | 1409 |
| CIONA           | EYYIGLL---T <b>Y</b> A <b>V</b> ---V <b>S</b> P <b>V</b> L <b>E</b> P <b>T</b> S <b>T</b> ---K <b>E</b> T-D <b>L</b> E <b>N</b> -----                                                                            | 1381 |
| OCTOPUS         | HLWR-LI---C <b>E</b> C <b>V</b> ---L <b>Q</b> P <b>E</b> Y <b>V</b> E <b>F</b> N <b>L</b> T---D <b>L</b> E-V <b>V</b> N <b>K</b> -----                                                                           | 1363 |
| CAPITELLA       | NLWD-TL---L <b>L</b> A <b>V</b> ---L <b>Q</b> P <b>T</b> O <b>L</b> E <b>F</b> N <b>M</b> G---Q <b>V</b> E-V <b>M</b> N <b>H</b> -----                                                                           | 1393 |
| LIMPET          | TLWE-LL---I <b>K</b> C <b>V</b> ---V <b>O</b> P <b>O</b> S <b>V</b> E <b>F</b> N <b>M</b> G---D <b>V</b> E-V <b>M</b> N <b>N</b> -----                                                                           | 1382 |
| SCALLOP         | ALWE-MV---C <b>M</b> C <b>V</b> ---V <b>E</b> P <b>G</b> S <b>V</b> E <b>F</b> N <b>L</b> G---E <b>V</b> E-V <b>M</b> K <b>N</b> -----                                                                           | 1416 |
| LINGULA         | DLWI-LI---C <b>D</b> C <b>V</b> ---L <b>N</b> P <b>S</b> A <b>L</b> E <b>F</b> N <b>M</b> G---D <b>V</b> E-V <b>M</b> M <b>K</b> -----                                                                           | 1401 |
| OYSTER          | DLWN-LI---S <b>M</b> C <b>V</b> ---L <b>Q</b> P <b>S</b> A <b>V</b> E <b>F</b> N <b>L</b> G---D <b>V</b> E-I <b>I</b> K <b>N</b> -----                                                                           | 1389 |
| SNAIL           | DLWR-LC---I <b>R</b> C <b>V</b> ---V <b>O</b> P <b>S</b> S <b>V</b> E <b>F</b> N <b>M</b> G---D <b>I</b> E-I <b>I</b> T <b>K</b> -----                                                                           | 1396 |
| SPONGE          | ELYT-IV---M <b>D</b> S <b>L</b> ---F <b>Y</b> S <b>S</b> L <b>V</b> E <b>T</b> A <b>P</b> D---D <b>P</b> S-T <b>A</b> K <b>R</b> -----                                                                           | 1393 |
| PRIAPULA        | ELWD-VV---L <b>L</b> S <b>V</b> ---L <b>D</b> P <b>T</b> R <b>V</b> E <b>F</b> N <b>M</b> A---D <b>I</b> E-V <b>V</b> E <b>K</b> -----                                                                           | 1406 |
| DANTIO          | SLFT-LV---V <b>L</b> A <b>V</b> ---C <b>E</b> P <b>S</b> S <b>I</b> E <b>F</b> N <b>M</b> A---D <b>L</b> E-V <b>M</b> T <b>H</b> -----                                                                           | 1404 |
| ESHARK          | DLFE-LI---A <b>M</b> V <b>V</b> ---I <b>D</b> P <b>T</b> S <b>I</b> E <b>F</b> N <b>M</b> A---D <b>V</b> Q-V <b>M</b> K <b>N</b> -----                                                                           | 1401 |
| BSHARK          | TLFE-LV---A <b>T</b> V <b>V</b> ---I <b>D</b> P <b>S</b> I <b>E</b> F <b>N</b> M <b>A</b> ---D <b>V</b> Q-V <b>M</b> K <b>G</b> -----                                                                            | 1403 |
| XENOPUS         | PMWE-LI---A <b>I</b> T <b>V</b> ---C <b>D</b> P <b>S</b> S <b>I</b> E <b>F</b> N <b>T</b> A---D <b>V</b> E-V <b>I</b> N <b>N</b> -----                                                                           | 1418 |
| STERLET         | TFPE-LI---T <b>T</b> T <b>V</b> ---C <b>D</b> P <b>S</b> S <b>I</b> E <b>F</b> N <b>M</b> A---D <b>V</b> E-V <b>M</b> K <b>N</b> -----                                                                           | 1417 |
| GAR             | TFPE-LI---A <b>T</b> T <b>V</b> ---C <b>E</b> P <b>S</b> S <b>I</b> E <b>F</b> N <b>M</b> A---D <b>M</b> E-V <b>M</b> T <b>N</b> -----                                                                           | 1404 |
| HUMAN           | HLMR-VL---V <b>Q</b> T <b>L</b> ---C <b>E</b> P <b>A</b> S <b>I</b> E <b>F</b> N <b>I</b> G---D <b>V</b> Q-V <b>M</b> A <b>H</b> -----                                                                           | 1394 |
| PLATYPUS        | TFME-LV---V <b>E</b> I <b>V</b> ---C <b>D</b> P <b>S</b> S <b>I</b> E <b>F</b> N <b>V</b> A---D <b>V</b> Q-V <b>M</b> S <b>N</b> -----                                                                           | 1398 |
| TASDEVIL        | YFME-LL---V <b>K</b> T <b>L</b> ---C <b>D</b> P <b>S</b> S <b>I</b> E <b>F</b> N <b>I</b> A---D <b>V</b> Q-V <b>M</b> N <b>N</b> -----                                                                           | 1401 |
| COELACANTH      | ALLE-LT---V <b>R</b> T <b>V</b> ---C <b>E</b> P <b>A</b> S <b>I</b> E <b>F</b> N <b>T</b> A---D <b>V</b> Q-V <b>M</b> K <b>N</b> -----                                                                           | 1405 |
| CAECILIAN       | NLVE-LT---V <b>L</b> T <b>V</b> ---C <b>D</b> P <b>S</b> S <b>I</b> E <b>F</b> N <b>V</b> A---D <b>V</b> Q-V <b>M</b> K <b>N</b> -----                                                                           | 1407 |
| CANARY          | SFIE-LV---V <b>M</b> T <b>V</b> ---C <b>D</b> P <b>S</b> H <b>V</b> E <b>F</b> N <b>T</b> A---D <b>V</b> Q-V <b>M</b> K <b>N</b> -----                                                                           | 1396 |
| OSTRICH         | SFIE-LL---V <b>M</b> T <b>V</b> ---C <b>D</b> P <b>S</b> H <b>V</b> E <b>F</b> N <b>T</b> A---D <b>V</b> Q-V <b>M</b> K <b>N</b> -----                                                                           | 1366 |
| GECKO           | NLIE-LT---V <b>R</b> T <b>V</b> ---C <b>D</b> P <b>S</b> I <b>E</b> F <b>N</b> T <b>A</b> ---D <b>V</b> Q-V <b>M</b> E <b>K</b> -----                                                                            | 1405 |
| TURTLE          | NLIE-LL---V <b>R</b> I <b>V</b> ---C <b>D</b> P <b>A</b> N <b>I</b> E <b>F</b> N <b>T</b> A---D <b>V</b> Q-V <b>M</b> K <b>N</b> -----                                                                           | 1405 |
| ALLIGATOR       | NLIE-LL---V <b>V</b> T <b>V</b> ---C <b>D</b> P <b>S</b> A <b>V</b> E <b>F</b> N <b>T</b> A---D <b>V</b> Q-V <b>M</b> K <b>N</b> -----                                                                           | 1363 |
| APLYSIA         | DLWR-LL---C <b>D</b> C <b>V</b> ---L <b>R</b> P <b>A</b> S <b>V</b> E <b>F</b> N <b>L</b> A---D <b>T</b> E-I <b>M</b> L <b>N</b> -----                                                                           | 1413 |
| TRICHOPLAX      | NLFE-MI---F <b>L</b> C <b>I</b> ---L <b>T</b> P <b>H</b> O <b>L</b> E <b>F</b> N <b>V</b> G---D <b>I</b> E-V <b>L</b> E <b>K</b> -----                                                                           | 1381 |
| SOFTCORAL       | KFFE-AL---C <b>T</b> S <b>V</b> ---L <b>E</b> P <b>O</b> S <b>L</b> E <b>F</b> N <b>V</b> A---D <b>L</b> E-V <b>L</b> E <b>K</b> -----                                                                           | 1395 |
| STONYCORAL      | DLFE-VV---L <b>S</b> C <b>V</b> ---L <b>E</b> P <b>G</b> V <b>V</b> E <b>F</b> N <b>M</b> G---D <b>V</b> E-V <b>V</b> E <b>K</b> -----                                                                           | 1418 |
| SEA ANEMONE     | DLFT-VV---F <b>S</b> C <b>A</b> ---L <b>E</b> P <b>A</b> L <b>I</b> E <b>F</b> N <b>V</b> G---D <b>V</b> E-V <b>I</b> E <b>K</b> -----                                                                           | 1398 |
| SEACUKE         | SFSN-LL---C <b>S</b> C <b>F</b> ---L <b>N</b> P <b>V</b> S <b>V</b> E <b>F</b> N <b>M</b> A---D <b>V</b> E-V <b>M</b> N <b>N</b> -----                                                                           | 1405 |
| LANCELET        | PLYD-MV---V <b>T</b> A <b>A</b> ---L <b>E</b> P <b>T</b> A <b>L</b> E <b>F</b> N <b>M</b> G---D <b>V</b> E-I <b>M</b> E <b>K</b> -----                                                                           | 1422 |
| STARFISH        | SLFD-LV---V <b>T</b> C <b>L</b> ---L <b>Q</b> P <b>T</b> V <b>V</b> E <b>F</b> N <b>M</b> A---D <b>V</b> E-I <b>M</b> N <b>A</b> -----                                                                           | 1427 |
| SEA URCHIN      | LFAB-IL---C <b>G</b> C <b>V</b> ---L <b>K</b> P <b>A</b> S <b>L</b> E <b>F</b> N <b>M</b> A---D <b>T</b> V-I <b>M</b> N <b>A</b> -----                                                                           | 1420 |

Supplementary Figure 6 CLUSTAL OMEGA ALL PHYLA, EXPANDED

|                 |                                                                      |      |
|-----------------|----------------------------------------------------------------------|------|
| PARAMECIUM      | -----RLL-----QGTIKF-T---EF-ROVL-N                                    | 1364 |
| TETRAHYMENA     | -----ITPVIKALQEIT-----QEGVDFPQ---DVLKAL-E                            | 1419 |
| STYLONCCHIA     | NLDLAKI IKK-----D-IVPSMRCIN-LN-----HMTVDNVQ---NYHPK---               | 1433 |
| APHANOMYCEsa    | -----P-----EAVDSWRMCKASLEH-Q---LPFRVU-A                              | 1311 |
| APHANOMYCEse    | -----DTQVMNLCQSLRRON-----LLFRNV-L                                    | 1280 |
| PYTHIUM         | -----FKSFCADVAERSSSLATSLRKRGSIT---SKLLKTI-Q                          | 1395 |
| PLASMOPARA      | -----IEEPCSYVTMHSPQWAHQMKMIDRML---IKLHQSL-A                          | 1382 |
| BREMIA          | -----IEDFCSYLTVHSSDWAHQFKTVDLIL---LNLKQCL-A                          | 1368 |
| AEDDES          | -----VPKR-VMQLLDKIEGFE-----NLRFK---ETVYQKL-S                         | 1408 |
| MIDGE           | -----LPER-I IKF I S S I N D H A-----PNEFK---ESLIEVL-R                | 1371 |
| BOMBUS          | -----LFVI-MGNLLQSMHKN-----NISLL---HLLKCEL-L                          | 1307 |
| ANT             | -----LPHV-LETLLNSMRKY-----SYALP---DFFPKCL-V                          | 1326 |
| WHIPWORM        | -----YSAK-IPALFGALKAN-----HHLC---ASISPIF-V                           | 1379 |
| TRICHINELLA     | -----ISQD-VRLFLALKNN-----TFLV---QQVSTSM-K                            | 1393 |
| BEEBLE          | -----E-SV-LKGFPLNSLP-----QSQV---LQV---G                              | 1319 |
| BARNACLE        | -----LPAA-LDRLLRSVARYA-----D-----AETRRL-T                            | 1323 |
| THRIP           | -----LSIT-VQFRLSNLTHA-----PASAV---NDLKCIL-K                          | 1323 |
| FLA             | -----YLIK-LNEFIENLR-----QYKN---DTYYHQIEG                             | 1319 |
| WHITEFLY        | -----FSEV-VAELLRLD-----KYLTL---QKLAQEL-H                             | 1350 |
| TICK            | -----LPNE-MLRFLNCVSRTF-----PKLLA---DDFVGAH-A                         | 1367 |
| TERMITE         | -----LPKN-LIQLLGLVQETL-----PSSQL---EELNSEL-G                         | 1384 |
| DAPHNIA         | -----YAC-LETILPFLAPDK-----EVIES---                                   | 1270 |
| OSTREOCOCCUS    | -----RA-AIQLLKTISVDN-----GSSKAKRLYEAVANL-Q                           | 1383 |
| STENTOR         | -----VLYDKLSAKVINFLIQG-----                                          | 1205 |
| KLEBSORMIDIUM   | -----LAKA-SMMLRELAEA-----SSGFK---GCVGIAL-R                           | 1487 |
| CLUBBOSS        | -----LRML-VSSVWLSLTRI-----SSGFK---DGLVQVL-R                          | 1338 |
| MOSS            | -----LAKL-ASKVLRPTQL-----SSNLK---SEMVELL-R                           | 1418 |
| LIVERWORT       | -----LAKL-SLGVIQRLSVV-----SSDFK---EGLTKRL-M                          | 1442 |
| LIGNANO         | -----LLDC-LSTAWHAVARNL-----APVGSYR---SSIVSAI-A                       | 1486 |
| COPEPOD         | -----FVSC-YIELLRAVRSW-----PEYF---SKLENFF-T                           | 1361 |
| GLOBOSUM        | -----VSSR-LVEVITLLNRCL---EQPFKML-----MNTF-A                          | 1317 |
| PALUSTRIS       | -----LPRR-MESVLRSMKTNL---PKMWQVM-----VQSL-A                          | 1372 |
| NEOCALLIMASTIX  | -----FYNT-LQKLLNLLKNNE---LFIDYKVL---I---SSLA-E-Q                     | 1441 |
| GLOMUS          | -----OKLIITQ-VETL-----LKLFKKLSINNV---TQLAQDL-A                       | 1479 |
| LOBOSPOR        | -----L-TIL-RDEL-K---VA-----LRVISKLPMSIT---RSCGEML-M                  | 1416 |
| SYNCEPHALASTRUM | -----T---WMT-SEKVLHVQFLFL---HAMVGKGPCKFL---RTFAKSV-N                 | 1396 |
| FUNCTIVORUM     | -----NSDVLELLKRSLE-----EVLIS-----QPKYD---IFAWCSM-K                   | 1284 |
| HALBUM          | -----NNKQVNEPLPLNLI-VDRVCO-LIVNQ-----GDKYR---DTLIGYL-G               | 1507 |
| DPURPUREUM      | -----REEIRNLMRSRFFKPPPLIEI-IDHIFSLPIAVR-----PKYQ---DFFKLSL-Y         | 1506 |
| PVIOLACEUM      | -----KQEISNLLGRQFKPPPLSEI-TARI IKI I L I E N G-----GAKYK---DTIYQVV-R | 1494 |
| AMPHIPOD        | -----LLPR-LVDTLQTFORYL-----SQEQK---LVLKRSI-D                         | 1428 |
| SHRIMP          | -----LPSR-LEEILGILARRG-----PSEVI---GEYSDDL-E                         | 1405 |
| MUDCRAB         | -----LPSR-MEEVLKVMQKV-----PNVVS---AAFIQTL-E                          | 1404 |
| TARDIGRADE      | -----LPRQ-MSEFLKATTKV-----DALWT---VMIRQAV-T                          | 1433 |
| HYDRA           | -----LPPE-MYTLSEKMRKFA-----PDHFL---NSFYNVL-S                         | 1369 |
| SALPINGOBECA    | -----LPKK-TGVVLASLCLS-----GEPR---TNLVAAM-R                           | 1399 |
| SPIDER          | -----LPME-VSIVVSKLSK-----K---SEFHAF-C-L                              | 1413 |
| LIMULUS         | -----LPHE-TTHLLKAFYKL-----PSPVL---EDFAHSL-E                          | 1409 |
| SCORPION        | -----FPKE-TRTLKVFYBYM-----PKPLY---NMFEBEL-Y                          | 1415 |
| ROTIFFER        | -----LSPK-IRQFYKLVIQML-----PTDKQ---NKFROQC-Q                         | 1438 |
| CIONA           | -----LQAL-NTSALQAALTHL-----PQNK---NLLVASTI-A                         | 1410 |
| OCTOPUS         | -----LPDE-LQNLNLPKLL-----PAEFK---QMQRESI-K                           | 1392 |
| CAPITELLA       | -----LPEQ-TLGTLIQILMRSL-----PRNLA---QELIESV-S                        | 1422 |
| LIMPET          | -----LPSE-VPTKLMFVGITN-----                                          | 1398 |
| SCALLOP         | -----LPRE-MEQVMVMKSKL-----PTKLF---DNMKHQF-T                          | 1445 |
| LINGULA         | -----LPEQ-MEQVLRIFSRYL-----PPKAL---DMFRRTL-K                         | 1430 |
| OYSTER          | -----LPTE-MEQLLKVLNAKL-----QPDVL---AAMCKEF-G                         | 1418 |
| SNAIL           | -----LPHE-MQVLRVLSRQL-----PLPER---KELVKIL-E                          | 1425 |
| SPONGE          | -----ISEA-AVSCLTAMCTSL-----PIDVK---QNLIAIY-A                         | 1422 |
| PRIAPULA        | -----LPEQ-TERLLIALSWKL-----PNAPK---KELHSRV-A                         | 1435 |
| DANTO           | -----LPEV-CPPLKALASA-----PYR---TQLESCI-R                             | 1430 |
| ESHARK          | -----LPHV-CVKLLANVMKS-----PFK---ETLVDVSV-R                           | 1427 |
| BHARK           | -----LPDI-CVRLMKALRS-----PYQ---ESLECSM-K                             | 1429 |
| XENOPUS         | -----LPNI-CIKLMKALGNT-----SYR---SSEVSL-K                             | 1444 |
| STERLET         | -----LPDI-CVRLKALAKS-----PYK---GQLEISM-K                             | 1443 |
| GAR             | -----LPEV-CVHILKALKS-----PYK---TQLEQSI-R                             | 1430 |
| HUMAN           | -----LPDV-CVNLMKALKMS-----PYK---DILETHL-R                            | 1420 |
| PLATYPUS        | -----LPDV-CVSVKALKKS-----PYK---DALEGNI-K                             | 1424 |
| TASDEVIL        | -----LPHV-CVNLLKALKKS-----PYK---ESLEINI-K                            | 1427 |
| COELACANTH      | -----LPEI-CVRLKALKMS-----PYK---DTLEASI-R                             | 1431 |
| CAECILIAN       | -----LPDV-CIKLLKGLMKS-----PFK---NDLEFSI-K                            | 1433 |
| CANARY          | -----LPDI-SVRLMKALKMS-----PYQ---ESLKLCL-K                            | 1422 |
| OSTRICH         | -----LPDI-SVRLMKALKMS-----PYK---ESLKLCL-K                            | 1392 |
| GECKO           | -----LPDI-CVRLKALKMS-----PYK---ESLVTSM-K                             | 1431 |
| TURTLE          | -----LPDI-SVRLKALKMS-----PYK---ESLEISI-K                             | 1431 |
| ALLIGATOR       | -----LPDN-TVRLMKALAKT-----PYK---SSELESI-K                            | 1389 |
| APLYSIA         | -----LPKE-MSQVLAVVHKKL-----PAQLL---KQFKVTL-R                         | 1442 |
| TRICHOPLAX      | -----LPQQ-MKDVCGLFOMKL-----PKDKR---ELMIITL-K                         | 1410 |
| SOFTCORAL       | -----LPEQ-TFELCKSLASKL-----PKQFL---IHLTTTL-M                         | 1424 |
| STONYCORAL      | -----LPEQ-TGVLCKLLVQRL-----SGECL---ERLKGTL-E                         | 1447 |
| SEA ANEMONE     | -----LPEQ-VSMTEAAWHIS-----                                           | 1413 |
| SEACUKE         | -----LPKT-TSOLLELMAANL-----PPKCC---EEFKTSV-A                         | 1434 |
| LANCELET        | -----LPQE-TRQLLLMCRSL-----PSQQG---ALLSQV-A                           | 1451 |
| STARFISH        | -----LPKT-TRKLLRLMSTHL-----PANLR---NNLSKAV-T                         | 1456 |
| SEA_URCHIN      | -----LPQT-TNRVLDLTYTKL-----PTEQL---KKLETVI-H                         | 1449 |

Supplementary Figure 6 CLUSTAL OMEGA ALL PHYLA, EXPANDED

|                 |                                                                |      |
|-----------------|----------------------------------------------------------------|------|
| PARAMECIUM      | EIPDN--QPVSAQT--I-----TNKDLIKDINELKPFLLKGLKWSNQ--CSD--DQD      | 1409 |
| TETRAHYMENA     | DIFKG--NKPQFEE--I-----ISDEQKLKENEKIFLEGIKLFK--CSQ--SSR         | 1464 |
| STYLNCHIA       | -----M-----MLMSM--CLG--YLK                                     | 1444 |
| APHANOMYCEsa    | KHLES----STYDR--T-----L--LFNMESDLAQRCLMCTYKQLD--QIK--YWD       | 1349 |
| APHANOMYCEse    | QVLSN----SPYRR--E-----N--LFDMSNLVQWICATYSELH--KIN--FWS         | 1318 |
| PYTHIUM         | DDSAE--SSESPTVR--I-----DRQLLSLRLVNLVVCV--VVE-----              | 1429 |
| PLASMOPARA      | DVSSS--E--S--LSD--H-----SDTITSLTLFGSKVLCAELVK-----             | 1414 |
| BREMIA          | HVDSS--E--T--FDK--Q-----SETISSLSLPGSKVLCAGIAG-----             | 1400 |
| AEDES           | EKLSS--SMEDFSD-----RIE--DLMSSSETIGLEDGNCAKILMVAQR--YTT--FKR    | 1454 |
| MIDGE           | TEVIT--NFNEVWQ-----NCD--KSLNERTISLLESNKLRLGIDMLIQ--LKH-----VLS | 1417 |
| BOMBUS          | IYVEK--HIYDFVV--LDMIIY--GKK--NFTELKQYVRGLSFLD--RRN--ILN        | 1350 |
| ANT             | MSVRE--HVIKLLN--LCDIV--END--SCDILLQHVNLSLK--KCD--ILD           | 1368 |
| WHIPWORM        | DHLKS--RHP-----WPDVNN--VFSADSCDMSEARQTRGYALLK--RMG--YLP        | 1422 |
| TRICHIANELLA    | EYLTQ--FYP-----WPDVES--VVTCDSHLAIEQQQLLNVMYQMLV--EVG--LQS      | 1436 |
| BEEBLE          | NVLSK--YVTDNFN-----D--EPDKDHWKLRQRHIVRGYIILYQLTSL--LQK         | 1361 |
| BARNACLE        | DSLAR--RAAG--RSVCQALGEA--LSSQ--HDQHVAAQQLRGLRTLQ--SSR--LLS     | 1368 |
| THRIP           | DYLS--VAPDMLN-----RPH--EAIIRDRVLPDKDELVRGLSVLQ-----            | 1361 |
| FLA             | SITIEK--LNECIHEYFNTEVNFN--S----V--SLSVAKNNCLNAISSIC--KH        | 1362 |
| WHITEFLY        | DAFST--EVSVVYENLINKPLMYQ--LL-----HQASNNVEAEGVLVLLQQIQSCR--SKN  | 1399 |
| TICK            | DLVDH--RPECGLDKVLAMPLTNL--DCLRNDLKW--IGLASGYRLLA--ELR--II      | 1415 |
| TERMITE         | KAVSS--MQTDVLS-----NLQ--DSLNRDKVLEQRQLLKGLEILH--KCG--MLS       | 1428 |
| DAPHNIA         | -VLNS--EFFRLEY-----LNLAEATRSLDIIRGLILIV--KSV--YMG              | 1305 |
| OSTREOCOCCUS    | QMVSI--PKFNLE-----VLSSTQGCIAAQRLLVDGYTGLA--SVS--MLR            | 1424 |
| STENYOR         | --V--KAENILK--TWETAFFPERLQTKTGLKGLTALLESP--LL--KTP--VLQ        | 1249 |
| KLEBSORMIDIUM   | SLMEPEGSSFDLGA--VSLDEVLGVSRAAQQAELLSLVRGYQQLF--HAG--ALT        | 1539 |
| CLUBMOSS        | EMLN--TSSEFDIST--LELHQ--ITEG--RLSQMNLVKAYQHLH--TVG--ALV        | 1382 |
| MOSS            | RVIEGDDPAYDLNN--LSPSS--KISGKPKALSLDALSLVKYQQLS--QVK--ILP       | 1468 |
| LIVERWORT       | VL--LADNKFDLGS--IDLSL--DGSNGSGSLGVEDAMSLKGYQQLH--LSG--SLL      | 1490 |
| LIGNANO         | AELELAGQSVTVQR--LLPQSG--LASDPPSVAGAVRLARGVRLR--DCG--LLA        | 1534 |
| COPEPOD         | KVYQE--D--ELFS--PNHLL--VGIIDGNPNMHAVKTYLRLT--KHK--MLT          | 1402 |
| GLOBOSUM        | EYLLS--SD--FDLRK--T-----NIYSRRQTYLQVTLNGLQSLR--KCG--ILE        | 1358 |
| PALUSTRIS       | DVYFN--DQ--IDVAK--V-----NPKDLQRRTLLRVTAGLQQLC--RAD--MPD        | 1413 |
| NEOCALLIMASTIX  | ESIYS--KKFIDTYQ--E-----V--NSLSENSAFLNSIYILN--ASG--ILQ          | 1479 |
| GLOMUS          | EIAFS--DE--VDLLN--I-----ELDKSDPTYDYDITGHYLVLS--SSG--LFP        | 1519 |
| LOBOSPOR        | EAISS--GDLPPLSA--S-----PDVKGQD--PIRFKAVIDGLELVR--ECD--VLE      | 1458 |
| SYNCEPHALASTRUM | ALIRT--DD--LDLQ--L-----QHGGQALIEMLQTLGGFKVLQ--SVK--LPD         | 1436 |
| FUNCTIVORUM     | EKIFV--EMSN--VI--I-----QMIKLEAETLTVQ-----                      | 1411 |
| HALBUM          | E--MIS--SSSCLNLE--I-----GVLITTEGTRDLVSLINGYNTLQ--KQS--ILD      | 1549 |
| DPURPUREUM      | EILLD--KKSFNLLN--I-----NELINLEGTDKLIQLIHSYQIILY--KPK--FLD      | 1549 |
| PVIOLACEUM      | E--YIL--LDQYNLLQ--I-----DKLLAQGSDRIIQLIHCYKNLY--TNG--MLD       | 1536 |
| AMPHIPOD        | SLMSG--DNLRLST--LLPLHSS--AVTYVAPTRHFHFGVAALH--QTE--WLD         | 1473 |
| SHRIMP          | KQLQK--PENDIIK--MLPLSL--ETAHINLRSRHHVIEGIGILE--KSG--WLA        | 1450 |
| MUDCRAB         | KYLGs--PQYDVL--TFTSPLA--EGVNVPLKSHVIEGLQILQ--RSG--WLA          | 1449 |
| TARDIGRADE      | -LLL--KPEYDMVE--L--L--RNSGKLENVHLLVAGFTVLH--EASQTELVK          | 1476 |
| HYDRA           | SVLCE--KQYNLLS--HLPDLC--NTNN--DICDMLCQLASGYKLLH--KCE--LFA      | 1415 |
| SALPINGOBECA    | TTLAS--DECDLLR--MVRD--VLPGRDIPAPLKNVSVGQQLL--AAD--LLD          | 1444 |
| SPIDER          | EYLS--KNGCNLEK--LLPLKLS--DPRCNLSQMTTELLNGYDILL--KNG--FHA       | 1459 |
| LIMULUS         | RHITS--EESSNLMA--MLPLDLR--KKYIDHMLRHLHLLNGYBQLI--NCG--FWP      | 1455 |
| SCORPION        | EYL--ESKNTLN--LPLMLN--DKLKIIEIQEMLLGYBQLI--ENK--LWP            | 1459 |
| ROTIFFER        | QILLD--SRELND--FVLKDIWINSQTIAGYELLS--DFK--IFK                  | 1479 |
| CIONA           | ERLAG--IGSLPE--SLPPFP--STASHNNAIHLITGHQTLN--SCE--ILL           | 1454 |
| OCTOPOUS        | NQLVN--QRDLIT--VLPJHLK--SPNTNYFKLQQLITGYRIILN--KVK--LLG        | 1436 |
| CAPITELLA       | RHLNM--SSCDLSS--KLPJPLL--EPNODYQLRLVLSGFBOLN--SAG--LLS         | 1467 |
| LIMPET          | -----FSDLFS--LLTNLSLN--NPVVGHTVQLHVLVSGYILLN--KTG--LLV         | 1438 |
| SCALLOP         | KT--LS--GRRDLGS--YLPJLTL--DLKLDIYLLQQLLGGYHQLH--TAG--LMT       | 1489 |
| LINGULA         | SKLDS--GSYNLLK--KLPJHLS--GPSDHMTDSHLVAGYQLLH--KTD--PLL         | 1475 |
| OYSTER          | RL--LQ--GDRDLGS--LLSRPLD--DPSTDHVFLLQQLVSGYQLLH--SVG--LLS      | 1462 |
| SNAIL           | QE--LK--GRGDLFG--QIPJSLT--SSSIDYTNLQQTVEGYCQLH--DVR--ILL       | 1469 |
| SPONGE          | SNINT--GQTNVIN--RLPVSY--NESTTSSGILLFNRLVQGHYILA--ESNK--CLS     | 1471 |
| PRIAPULA        | RSLSE--K--KYN--ILPRLPC--LMTDTGDDTRYLSSLVCGYQLY--KAE--LLL       | 1480 |
| DANTO           | MRTK--QSVELCA--I--DL--YETDRNSHASNMLLSACKQLH--QSG--LLN          | 1475 |
| ESHARK          | KRITA--QSIEALCN--V--DL--YSPGARTDHAGRLSILSACKQLH--KAD--LLN      | 1472 |
| BSHARK          | KRLKS--QSIEDLGN--V--DL--YSQ--SDHAKLNSILLACKQLH--KAG--LLN       | 1471 |
| XENOPUS         | KRVTL--QSIEELCS--V--DL--YDPGARFNRVKGSLVLSACKQLY--KAE--FPN      | 1489 |
| STERLET         | RRISY--KSVEELCG--V--DL--CNVDARSRARLAVVLSACKQLH--KAG--LLN       | 1488 |
| GAR             | RRVSQ--QNVQQLCA--V--DL--YGEARSEHARLALVLSACKQLH--RAG--LLN       | 1475 |
| HUMAN           | EKITA--QSIEELCA--V--NL--YGPDAQVDRSLAAVVSACKQLH--RAG--LLH       | 1465 |
| PLATYPUS        | KRVTA--QSIEELCT--V--DL--YKPDARFDRPRLASILSACKQLQ--RAG--LLH      | 1469 |
| TASDEVIL        | KRITP--QSIEVICA--V--NL--YNSDARFDRANLASSILSACKQLH--KAG--LLH     | 1472 |
| COELACANTH      | KRITA--RSIKELCS--V--DL--YNPDARLDHIRLGSILSACKQLY--DAG--LLN      | 1476 |
| CAECILIAN       | KRITS--ESIKDLCD--V--DL--YQDARHYHARIGSILSACKQLH--KAG--LLN       | 1478 |
| CANARY          | ERITP--QSIEDLCS--V--DL--FNSEARLDQVRFAGVLSACKQLQ--KSG--LLH      | 1467 |
| OSTRICH         | ERLTP--QSIEDLCS--V--DL--FNSEARLDQVRFAGVLSACKQLQ--KAG--LLH      | 1437 |
| GECKO           | KVITP--ESIEEFG--V--EL--YNSDARLDHVRGALLSACKQLH--RVG--LLH        | 1476 |
| TURTLE          | DRITS--QSIEELCS--V--EL--YNPDARFDRVRLSILSACKQLH--KAG--LLH       | 1476 |
| ALLIGATOR       | KRITS--HSIQELCS--V--DL--YDPDARFDRVRSILSACKQLH--KAG--VH         | 1434 |
| APLYSIA         | RL--E--TECNLTS--SLPLDLS--S--ASLDYQLSQMVGGRQLH--AAK--LLM        | 1486 |
| TRICHOPLAX      | ELLSR--NRSYNLDP--LLPFRPD--RDNELNIDFERLTFPLIKGYKOLL--TMG--ILK   | 1459 |
| SOFTCORAL       | SKISL--GGRCNLFE--LLPLPLS--GEECDQMDHTRLQLLVGYQQLH--RAE--ILL     | 1473 |
| STONYCORAL      | KKIAL--GSHCNLFD--QLPFPLS--NPQEHQVCLRLAYLVQGYQQLH--CAG--LLL     | 1466 |
| SEA ANEMONE     | -MFLG--FSRCNLFE--KLPJPLA--GE--DSRVHDHLYLHSLVGTGYKQLH--AAG--LLM | 1490 |
| SEAUCUE         | KRTSS--NRNEDLLA--MLPSVFE--NVRSGQYHANSLEHLISGYKQLQ--RAK--FWP    | 1483 |
| LANCELET        | AKLSR--RSSHDLFS--HLPEVSA--GV--AELDHVRLTLMVSGYQQLH--NAG--LLL    | 1498 |
| STARFISH        | RSVTK--SSHDLTK--LLQSMFG--RDEGLTTHGKLIHLVKGYQQLH--QAN--LLS      | 1505 |
| SEA_URCHIN      | KRITA--RSSEDLFS--LLPMLFS--NESDLGLDHWQLHVLVNGYKQLQ--KAK--LLT    | 1498 |

Supplementary Figure 6 CLUSTAL OMEGA ALL PHYLA, EXPANDED

|                 |                                                    |      |
|-----------------|----------------------------------------------------|------|
| PARAMECIUM      | SNNF-----POE-----CIDQLG---QVVINFE--                | 1429 |
| TETRAHYMENA     | YTR-----YIEK-----AI---S-----GILNGVK                | 1482 |
| STYLNCHIA       | --LA-----SIDP-----NI---K-----EYLISFR               | 1460 |
| APHANOMYCESa    | GESSSR-----RRDI-A-----CDFARLA                      | 1367 |
| APHANOMYCESa    | HD--Q-----QEDI-A-----NDPANMA                       | 1333 |
| PYTHIUM         | --LSK-----LTPH-V-----DNFVSLA                       | 1444 |
| PLASMOPARA      | ---SSA-----ADNY-A-----EIFALVA                      | 1429 |
| BREMIA          | ---FPE-----ADKH-A-----EMFALIA                      | 1415 |
| AEDES           | YFSSGTIDFL-----ETISNKLH-----NIFNGLK                | 1480 |
| MIDGE           | -FDALAQQL-----VKTAEVLLK-----KLFQCVV                | 1442 |
| BOMBUS          | QLD-RMK-E-----LINRQDTPV-----RIFKALV                | 1373 |
| ANT             | OTILETH-G-----FANREHMVD-----QIFRFLV                | 1392 |
| WHIPWORM        | Y-E-IIL-----NC---D-----NVMEVLI                     | 1437 |
| TRICHINELLA     | V-V-ELP-----RA---E-----FLWTTVA                     | 1451 |
| BEEBLE          | FTVGRVA-----PIL-----NKFLQPA                        | 1378 |
| BARNACLE        | S---AAPAEL-----RVSGEE-----LFAVVM                   | 1387 |
| THRIP           | SVFKETQMS-----GLIGERSLV-----AVFQAIV                | 1387 |
| FLEA            | SYVTRSKFWS-----SLANGQYIT-----NIYNGLI               | 1388 |
| WHITEFLY        | SFLMKVLKDK-----SFSTVNLYQ-----KIFNSLY               | 1425 |
| TICK            | ---RVPDLL-----AARALVR-----SL-AELL                  | 1434 |
| TERMITE         | HIVKELPNQY-----GLDGNQIVK-----HLFSALV               | 1454 |
| DAPHNIA         | AHFPCKSS-----SALL-----KLAVERNANPTSINFSGST          | 1339 |
| OSTREOCOCCUS    | RVLMBEGNTSA-----KVLAE-----VALSRVC                  | 1447 |
| STENTOR         | KVT-----BEP-----AKRMB-----SLI                      | 1264 |
| KLEBSORMIDIUM   | SILPKRL-----GEL-----AEKLAT-----AVFNLRK             | 1563 |
| CLUBMOSS        | PTLTKERS-----EQL-----SERLLH-----TVYTIK             | 1406 |
| MOSS            | LVLNKVRA-----GKL-----GERLLL-----TVFGIEQ            | 1492 |
| LIVERWORT       | SVLGKKEG-----KOM-----GEKLLA-----RVFQFGR            | 1514 |
| LIGNANO         | DSTADEK-----RQILD-----RCC-----RCC                  | 1549 |
| COPEPOD         | SPW-----N-----GVQLLN-----ELLSKLP                   | 1419 |
| GLOBOSUM        | AVLM-----AKS-----VS-----SRQYMA-----LVLRSGL         | 1380 |
| PALUSTRIS       | AVMD-----TRA-----MD-----TSANIV-----KLV---C         | 1432 |
| NEOCALLIMASTIX  | DIKYNN-----IS-----EYNYFQ-----YVLNCL                | 1501 |
| GLOMUS          | DLLEHEMYSYMNTS-----SK-----LYDYIL-----AIWKKFN       | 1548 |
| LOBOSPOR        | S-----MF---DGSS-----HK-----ACHYIA-----SLYEVFM      | 1480 |
| SYNCEPHALASTRUM | MVCRQKNT---AGHA-----SS-----ERAFVE-----DMFDKFL      | 1463 |
| FUNCTIVORUM     | ---LPRKQQT-----LKRI-----SHDLS-----QVFDSSQ          | 1436 |
| HALBUM          | VTLKPAKL-----SLPAM-----TSTLPD-----YLNHEVD          | 1575 |
| DURPUREUM       | SILLENNKTIINNSSNNNTLPESSTEP-----STPIIN-----YLFNHCE | 1591 |
| PVIOLACIUM      | TLLEISNSTAQTAQSTL-ISKCTNSQSF-----ANLME-----YLFHST  | 1577 |
| AMPHIPOD        | SLG-----S-----T-DDL-----ARHVTR-----WASDFLI         | 1494 |
| SHRIMP          | KCN-----V-----VSYSV-----AKELVD-----WLCGSIF         | 1472 |
| MUDCRAB         | QCS-----V-----IRKSL-----ASELIM-----WVCNSLF         | 1471 |
| TARDIGRADE      | DYL---QTKKL-----TSEQF-----ATKLIQ-----HVNASLTMK     | 1504 |
| HYDRA           | HLL-----SVDV-----TDL-----KKKLE-----SLDLSL          | 1438 |
| SALPINGOECA     | ECF---FTDR-----DAF-----GRELFA-----ALFEYS---        | 1466 |
| SPIDER          | NDL---FNNP-----DKS-----LNNLLD-----SIWTDSS          | 1482 |
| LIMULUS         | VGG---RKDS-----SAEPI-----SRELLN-----AVWGCVC        | 1480 |
| SCORPION        | KQN---CNKS-----KKL-----ACDMLS-----SVMESCI          | 1482 |
| ROTIFFER        | ITP-----DM-----SK-----FVFDLSQ                      | 1493 |
| CIONA           | RIPQEPNKPPIGAN-----NVTSA-----SEALIA-----SVFDSVV    | 1486 |
| OCTOPUS         | DMN-----LESL-----AAKLFH-----NVSONIV                | 1456 |
| CAPITELLA       | NTL---VSKSS-----EKL-----AEDLVN-----TVFMGMV         | 1491 |
| LIMPET          | NTN---VQQLV-----FDTVYKVCYPOFFLGMNIPVS-----VPFSGIY  | 1475 |
| SCALLOP         | SVH---LGSQK-----A-SDL-----AQKLPD-----NVFQGVV       | 1514 |
| LINGULA         | PAL---KDGGH-----SAENV-----SNNLQ-----TLFQAVS        | 1501 |
| OYSTER          | KVS---MATTL-----P-D-L-----ANKLLE-----YVHSSLI       | 1486 |
| SNAIL           | EVL---GKHGQ-----P-EKL-----AELLFD-----SVLRGIT       | 1494 |
| SPONGE          | DVL---KSMGT---S-----EESL-----AMRLYTNAL---TIIRGIS   | 1501 |
| PRIAPULA        | PAL---QEAA-----PAL-----PASLLT-----SVFEGCT          | 1503 |
| DANTO           | SVL---HSQDA---S-----YGCSL-----GSKLLT-----SVYKSTIA  | 1502 |
| ESHARK          | SAL---DCEAG---S-----LSSSL-----SLKLS-----VYKSTIA    | 1499 |
| BHARK           | SVL---KCQIG---S-----IVPPL-----NLKLS-----TVYKSTIA   | 1498 |
| XENOPUS         | SIV---PEQVG---G-----Q-RF-----GSKLS-----VYKSTIA     | 1514 |
| STERLET         | SAL---SQQA---S-----FGLSL-----GSKLS-----VYKSTIA     | 1515 |
| GAR             | STL---SQQA---S-----FGLSL-----GSKLS-----VYKSTIA     | 1502 |
| HUMAN           | NIL---PSQST---D-----LHHSV-----GTLLS-----LVYKSTIA   | 1492 |
| PLATYPUS        | AAV---HPQAS---H-----LQRPG-----STKLS-----VYKSTIA    | 1496 |
| TASDEVIL        | STV---ESQAT---D-----LPHPI-----GTLLS-----VYKSTIA    | 1499 |
| COELACANTH      | SAV---YQSG---D-----FNLQL-----GSTLLS-----VYKSTIA    | 1503 |
| CAECILIAN       | SVL---SQQA---G-----LQFTV-----GSKLS-----VYKSTIA     | 1505 |
| CANARY          | SVL---HQDE---G-----SHFSV-----GSKLS-----VYKSTIA     | 1494 |
| OSTRICH         | SVL---HQDE---V-----PHFSL-----GSKLS-----VYKSTIA     | 1464 |
| GECKO           | CTL---SQQV---G-----LHCEA-----GSKLL-----VYKSTIA     | 1503 |
| TURTLE          | STL---SQQS---G-----LHPTV-----GSKLS-----VYKSTIA     | 1503 |
| ALLIGATOR       | SVL---SQQS---G-----LHPTV-----GSKLS-----VYKSTIA     | 1461 |
| APLYSIA         | DQLPAAATAGT---T-----SKADL-----ASLLD-----NVFGLV     | 1516 |
| TRICHOPLAX      | TTP---ADH-----KDL-----IEKIMK-----SVVDCFR           | 1481 |
| SOFTCORAL       | PAL---AKEGE---W-----SAEKC-----SEELLK-----SVFQGF I  | 1500 |
| STONYCORAL      | PAL---KAQAR---N-----ASEEY-----AVKLF-----AVYDGVK    | 1523 |
| SEA ANEMONE     | DVM---LTRGS---T-----KPLEY-----GSRLN-----AVYEGAC    | 1487 |
| SEACUKE         | LRS-----AD-----GSEIVE-----EVFKALR                  | 1501 |
| LANCELET        | PA---LGTNS---G-----KSL-----ASELVS-----AVFKSMV      | 1522 |
| STARFISH        | AAT---TGHS---G-----SSF-----AVKLF I-----TVFDSL T    | 1530 |
| SEA URCHIN      | RQT---TNQAL---S-----ILD-----FVMRGLV                | 1517 |

Supplementary Figure 6 CLUSTAL OMEGA ALL PHYLTA, EXPANDED

|                 |                                                           |      |
|-----------------|-----------------------------------------------------------|------|
| PARAMECIUM      | --Q-----GNDQIN---NIE--YVTHLFEFL-----LSE-QRAK----          | 1455 |
| TETRAHYMENA     | --SS--E---EMLNKQDSLF-RESRTOQIQFALD-----ISS-ESTN----       | 1517 |
| STYLONCHEIA     | --SLPTIV--EAWFDIDTPIS--NESARVLVKFLSKLE-----I----PN----    | 1495 |
| APHANOMYCESa    | --IDK-----KASGLLTPMQ--DQLTHRAMEMTAMDG-----WADVTFIL        | 1403 |
| APHANOMYCESa    | --IAE-----RKNNTRSPIR--DQIARTAMQTAIEMG-----WDLASFIL        | 1369 |
| PYTHIUM         | --TRA-----LGGASVDPND--RLALELAIKAGCFGG-----WDMTRVFD        | 1480 |
| PLASMOPARA      | --RKI-----VEYGHGSQPD--RLVVVAALQAAAASE-----WNITDIFL        | 1465 |
| BREMIA          | --SKV-----LDHGNAGPHD--RLVIAAALKGAAACG-----WRITDIFL        | 1451 |
| AEDDES          | --RERLDE--LHVVDLTPSV--KRFFSCLHIVLFFKS-----TGTM-ELLVEFML   | 1524 |
| MIDGE           | --EEKLVN--KRPKLLTPSA--KAYASNIQLCLKI-----NDFL-STTVTFSS     | 1484 |
| BOMBUS          | --RESLGE--LIVVTKPSA--KDYLELMEFSLHY-----EFSMT-RMLIEFIE     | 1417 |
| ANT             | --SERIGE--LVCRLSMRM--TEYLRALMEFOSLSLSTIIGNLSLTP-KKLELTI   | 1443 |
| WHIPWORM        | --NSCVGREAVILRSTSLSTK--VGLAKRLLDVPQSA-----AQI-KSLIHLIA    | 1483 |
| TRICHINELLA     | --DVYFS-----KRIGLPPSK--LGMVKRIFRVAALTG-----SAV-DVLIXLIM   | 1491 |
| BEEBLE          | --EDKI-----IFLDLDQDIT--LSYCVLNYSLSDQ-----NEF-KVFPVOYLY    | 1418 |
| BARNACLE        | --ESCGRQ--PPT----DPMT--VRLADTALLETALG-----VPA-RRLLSALL    | 1426 |
| THRIP           | --EPVINS--EHKAPVSLNPTA--RMYAQMLFEYFSTC-----PEL-NQLINNIL   | 1431 |
| FLA             | --EENT--DtdTKIGIPFHVINIYKGLSVIFEHV-----DCK-DLLIESVL       | 1432 |
| WHITEFLY        | --DSNG--TT---VHLSEKD--TDFLRSLSLDTLLD-----EEV-ELLSGFIF     | 1464 |
| TICK            | --RSRG--AD----WPLG--KELCLRVLELAALG-----AQA-RDVLEAL-       | 1470 |
| TERMITE         | --EGQG-----DMKRTVVLPAA--FSYAESLLKFAFLLN-----KEV-TTVICCKI  | 1496 |
| DAPHNIA         | -----GDSVSSAV-RLRASSLIVLEALLIG-----LSM-EVLSNEFR           | 1374 |
| OSTREOCOCCLUS   | -----GLGHHANPQR--RVVGDIVKCLLHLM-----LAP-NVLDFPLL          | 1483 |
| STENTOR         | -----SKDSHE--ARKGRMELFELTKK-----IE--EKQLETFVL             | 1295 |
| KLBSORMIDIUM    | -----E-CPPPL--RPVATAMLLETALG-----LSV-GRLLDLYS             | 1595 |
| CLUBMOSS        | -----EPVSPLA--EPLYVEILRLSVALR-----VWV-DQLLRIVL            | 1439 |
| MOSS            | -----E-CPPSL--OPTAEMVNLMASLG-----VNA-TFLVNILM             | 1524 |
| LIVERWORT       | -----E-FPPL--ETIASVMVLSLALG-----TSV-QRLVELCL              | 1546 |
| LIGNANO         | --QLAESA--OTTQHPV----LPOLIDAAITYA-----LND-SALLQPLV        | 1586 |
| COPEPOD         | -----E-KTLNKISPD--LKNLEVFIIQLVDE-----SDSEHIAARLM          | 1456 |
| GLOBOSUM        | -----TISKSDLLQ--IQLARNMWBEICNN-----ESQ-EDAFSLIL           | 1416 |
| PALUSTRIS       | -----SLRETPDPT--ILVVGGLQVCLMHR-----SSR-ERYFSEIL           | 1468 |
| NEOCALLIMASTIX  | -----KLDNENPSY--DLIKOLLIDICINS-----EIQ-EECWGKLL           | 1537 |
| GLUMUS          | -----NLRVSDPLW--VELIRKLLSFALSLS-----KYN-GAINQWLL          | 1584 |
| LOBOSPOR        | -----SMQSTRDPLW--INYSALLQPSLGER-----QCR-ORLWDYLL          | 1516 |
| SYNCEPHALASTRUM | -----EMQSSDPLR--LKLVDVMRVA-GNS-----LCS-ESPYCRKL           | 1498 |
| FUNCTIVORUM     | -----VTPLE--QMGSLVQLCFR-----DVPSDVDFKLF                   | 1468 |
| HALBUM          | -----NITPAH--LIVYKELIVFILLSTG-----HIQPSKLLYELL            | 1608 |
| DPURPUREUM      | -----NLSPSK--LLSKELIQLVFTIG-----IEPQKLSMII                | 1623 |
| PVIOLACEUM      | -----KLSPSR--LLVFKQLLVLVFTIG-----ISSDKLLSYII              | 1609 |
| AMPHIPOD        | --TNPQRS--VAAFAPISHQ--ITSFASTALHVALQLR-----E-----         | 1528 |
| SHRIMP          | --KEQLS--VSGI-SPHPSL--LKFLYTMQLAITLD-----PKVKHLLSWAT      | 1515 |
| MUDCRAB         | --MYG--SAS--SPHPTQ--LPFLHVLDFAVTLTD-----SQVLELLVQVT       | 1510 |
| TARDIGRADE      | YANGSRK--EAWI--STD--VSQEKALFSLALQCO-----SSGASAAAF--       | 1544 |
| HYDRA           | --N---K--EKVSPFLPAQ--MLLANSRFLRYLEIN-----PSA-ALTDLPV      | 1475 |
| SALPINGOECA     | -----HTSTPEPTN--LAMAGLADLALSLS-----VPR-SQLLAMLR           | 1501 |
| SPIDER          | --ICCVSI--NKNIALNPAS--LNLAEKILKVAKMD-----LQV-QMLAKALL     | 1524 |
| LIMULUS         | -----GNVDGS--TFVATLNPPT--VALMEKLLDITFLLN-----TOP-DYLIKELL | 1522 |
| SCORPION        | --LETEIG--CCPILNPV--LNFQKMLTVALKLD-----ISS-EDLLAKLL       | 1524 |
| ROTIIFER        | --EETESQ-----TT--TEARKRLSCLSLIN-----RNF--LTKLL            | 1524 |
| CIONA           | --KLDDE--EALTDQEVTPHN--IQLGNKILQLSLHMA-----EAKKLLVNCIF    | 1531 |
| OCTOPUS         | --THSDDN--QLTSRTPPTE--LSLTOTLLELAQLS-----MPI-NEPMVAMF     | 1499 |
| CAPITELLA       | --TAVDVG--PTLVNLSPV--QSLAEKMLTALFQMG-----YPE-KNLVELIF     | 1533 |
| LIMPET          | --EEKGL--KKIITLTPAA--SILGKSLDLSFKLG-----LKD-NVLITALL      | 1517 |
| SCALLOP         | --CRNGGG--LEAITLTPVV--HTLMKMLALSFLHG-----LQG-SVLEAIL      | 1556 |
| LINGULA         | --EE-DQ--FRLLECPST--LELSRKLLELACSMT-----DKP-AQILGAIL      | 1541 |
| OYSTER          | -----CVEGGT--KKSQTPSPATA--QVTATMLLELSPCLG-----VQI-KKVMCIL | 1528 |
| SNAIL           | --EKKDGG--DKTWSLSPAA--HRFASQLKLAFQLG-----LPA-EKLVREGIL    | 1536 |
| SPONGE          | --SSPGDG--T-PGYMPLH--KLTGELLLKLGLELS-----DSV-EPFLLLVL     | 1543 |
| PRIPAPULA       | --LSPRDG--VSSLTGMSPSV--RELGGRMLRLAFTRK-----VES-DSLLESLF   | 1546 |
| DANTO           | --PCTDRK--SLPSMDVGS--RKLADRLVQLSPCLG-----DOS-EQTVGLLL     | 1543 |
| ESHARK          | --PGDERK--SLPSIDVGS--KRLADGLLQLSFLG-----GQC-EELVSLLL      | 1540 |
| BHARK           | --PGDERK--SLPTMDSV--KMLADGLLQLSFLG-----GQC-EELVSLLL       | 1539 |
| XENOPUS         | --PTNERK--SLPSLIDIS--KRLAEGLLLELAFMFG-----GQC-EELVSLLL    | 1555 |
| STERLET         | --PGDERK--SLPSMDVGS--RKLADGLLQLSFLG-----GQC-KELVDLLL      | 1556 |
| GAR             | --PGDEKK--SLPSMDVGS--RKLADGLLQLSFLG-----GQS-EQLVSLLL      | 1543 |
| HUMAN           | --PGDERQ--CLPSLDLSC--KQLASGLLELAFAFG-----GLC-EELVSLLL     | 1533 |
| PLATYPUS        | --PGDERQ--SLPSLEISS--KQLASGLLELAFAFG-----GLC-EELVSLLL     | 1537 |
| TASDEVIL        | --PGDERT--ALPSLEISS--KRLASGLLELAFAFG-----GLC-EELVSLLL     | 1540 |
| COELACANTH      | --PGDERK--SLPSIDIS--KRLADGLLQLAFSPG-----LQS-GELVCLLL      | 1544 |
| CAECILIAN       | --PGDERK--SLPSLIDIS--KRLADGLLQLAFDGL-----GQC-DELVSLLL     | 1546 |
| CANARY          | --PGGERM--SLPCLDLR--KRLADSLQLAFAD-----EQC-EELVSLLL        | 1535 |
| OSTRICH         | --PGAERL--CLPSLIDIS--KRLADGLLQLAFAD-----GQC-EELVSLLL      | 1505 |
| GECKO           | --PGDERK--SLPSLDMS--KRLAEGLLQLAFAFG-----VQC-KELVSLLL      | 1544 |
| TURTLE          | --PGDERK--SLPSLIDIS--KRLADGLLQLAFAFG-----GQC-EELVSLLL     | 1544 |
| ALLIGATOR       | --PGDERK--CLPSLIDIS--KRLADGLLQLAFAFG-----GQS-EELVSLIM     | 1502 |
| APLYSIA         | --QTEDRT--R-TAATLSPATA--QTLANALLELSQLS-----FDV-DKLVAKIL   | 1558 |
| TRICHOPLAX      | --GEMNG--DRITALSPAQ--QKVAAELLDFAFELN-----ETI-DIFFRYLL     | 1522 |
| SOFTCORAL       | --VQDS-D--VFRIVNTPAS--RELAKLLDLAFDLG-----LKI-ESVLHCIL     | 1542 |
| STONYCORAL      | --PSLVNG--L-QTVILDPA--QHLACKLLDLAFDLG-----LQF-NYLMSIM     | 1565 |
| SEA_ANEMONE     | --RAAVRT--SGSIIVLPAS--HQLACKLELAFDLG-----IEV-ITIFRRAV     | 1530 |
| SEACUKE         | --TSED-G--RDVAVSLRPAE--IELGTLLLELAFQMG-----VKV-PILVDLLT   | 1543 |
| LANCELET        | --TRKD-G--HPTAASLPPSF--HQLTGLLQLACQLH-----PQG-HDLLDCVM    | 1564 |
| STARFISH        | --TSDEAG--KLQANITPLS--VELAESLLDLAFLLG-----IEA-KMLVSCLL    | 1573 |
| SEA_URCHIN      | --KRGENG--Q-EARKMTPSE--IDLQRLLELAFQLG-----VQT-NSLIDCLL    | 1559 |

Supplementary Figure 6 CLUSTAL OMEGA ALL PHYLA, EXPANDED

|                 |                                                            |      |
|-----------------|------------------------------------------------------------|------|
| PARAMECIUM      | -----NFVISNLIKASDPFRQKYEPLAFVARNP-                         | 1484 |
| TETRAHYMENA     | -----EFILQIISQQSQPFQKYNQLLTVKSKW-                          | 1546 |
| STYLNCHIA       | -----ETLCEWLTKKHLLYQKSSDLLSYIAENW-                         | 1524 |
| APHANOMYCESa    | QPTPAN-----YTLFSAAFDKVCFDRDDVWL-                           | 1429 |
| APHANOMYCESa    | KSTDEN-----YDLFASTFDSSL-HKSSIWL-                           | 1394 |
| PYTHIUM         | DRDLRR-----KLSIYRDIILLPHRHWS-                              | 1506 |
| PLASMOPARA      | KSADRR-----MYASISYDVHMLPTLAVWK-                            | 1491 |
| BREMIA          | KPYDRQ-----KYAFIYSDMTHVIAASLAVWK-                          | 1477 |
| AEDES           | NEQKRLRYQOS-----VNSTILHGEHFVNTFDQVIFEYVIQRL-               | 1562 |
| MIDGE           | NDMQLM--IS-----QSSSIRHGEHF IETFKQPIFKLFTSNI-               | 1519 |
| BOMBUS          | NDTMLGS--GD-----K-KIKHGVPFFSTFKCEIFRYLLKDI-                | 1451 |
| ANT             | NDPFTVS--DC-----T-IKYGHEFLANTFESVIFKMLTHE-                 | 1478 |
| WHIPWORM        | DCQPVRYL-NP-----SSIAITKRNDAPVSLPFEETIAYVLCRNA-             | 1520 |
| TRICHINELLA     | NTESVRLA-EC-----TSLCSTKGGELLIANFSDEIALILCTNA-              | 1528 |
| BEEBLE          | KDYKVTQT-NC-----KQP-ISFGYTLFTIPEDTIIRKVVNTNF-              | 1454 |
| BARNACLE        | SEEQVRAG-----SGS-AERGWLFSSRFSAVLVPHLLQPA-                  | 1460 |
| THRIP           | DRSPLSOR-DL-----QCS-ITHGHEFVACFEAVLVPRLLGV--               | 1466 |
| FILEA           | NDVHIIGN-IT-----ESK-LAHGQHFYSIFGNQIKYLMRF--                | 1467 |
| WHITEFLY        | KTDQARLK-DS-----LRP-VTQGDHFKYLFFRQIISRFSDS--               | 1499 |
| TICK            | -----LP-SQ-----AWE-VL-GAQLCRHF---AERASDYV-                 | 1495 |
| TERMITE         | EQASIQNP-AT-----HSS-VLHGDYFFVTF---RS---AIL-                | 1525 |
| DAPHNIA         | NPANIPGA-----IITYGQYLRSKLGHVFPVVINQM-                      | 1406 |
| OSTREOCOCCUS    | DRRGP-----NSGQLGREALYRNFRSEFIRKCEFPQ-                      | 1514 |
| STENTOR         | AN-----SKLFGSMBELLYEYMSRNM-                                | 1314 |
| KLBSORMIDIUM    | DESEVVSQ-GGVPEAQ-----GDPTPGMVRRTGALFLNSRSDVIFKCVFQP-       | 1643 |
| CLUBMOSS        | DKNGD-----TVDRGTDVSTPGGRPYLSFRKVVVQVQKFFY-                 | 1475 |
| MOSS            | DEKSV-----GIST-NRKLTSGEVYPMNFRDTIVHQQVFFY-                 | 1559 |
| LIVERWORT       | DEETI-----SLPQTRKAMPGGIFYLNFRRLVQOVRFPP-                   | 1582 |
| LIGNANO         | T-----LLTEHSAGLDLLNSYKPLTAYFSANC-                          | 1614 |
| COPEPOD         | EI-----ISSDREKDVWFIRTFMMLCHKPILLNM-                        | 1485 |
| GLOBOSUM        | N-----PP-----VSGTDDAMVNL-KNLAPTIV---SHAV-                  | 1441 |
| PALUSTRIS       | C-----LE-----NEKDAETAIKFYQYASYINSLLRNF-                    | 1498 |
| NEOCALLIMASTIX  | G---LS--TM-----TDLKYSVDVISFYSKYKFINYLFINF-                 | 1569 |
| GLOMUS          | SDIIGFPS-DN-----STFYQNGTICYQKFSVINEHMSRNF-                 | 1621 |
| LOBOSPOR        | -----DN-----EHF--EQAQMILYLYADVINRQIALHF-                   | 1543 |
| SYNCEPHALASTRUM | -----LS-----NDLSDPERVTVYKHEFHYINACALHF-                    | 1527 |
| FUNCTIVORUM     | DARTIQGG-DQLPSL---GTMELGSVNEAGRVRIQSMTRGEEYVYKVDALRYTLRHR- | 1524 |
| HALBUM          | PPIKVLTK-STTTTTTTSSTITDKLEEEKRXQQIEHOSNFYKTYHSELLEYISKNP-  | 1666 |
| DUPURPUREUM     | NESNPKKS-KDVDANNQ---GD---GEDSIHVXKINDIPYKSLFTEINTYISSNF-   | 1671 |
| PVIOLACEUM      | DPTVKDKK-DKXDDNNN---SDKMDTDDKPEPPKDSRYDIPYKYIIEINTFVSNHF-  | 1663 |
| AMPHIPOD        | --ETVSEV-LE-----LVIAAGDEPL-VHADAVMTVLVLR-                  | 1560 |
| SHRIMP          | NSDTVSGT-SG-----QEVEKGSVLSILGPKLIPQFLESP-                  | 1550 |
| MUDCRAB         | NMEDVKGV-TG-----QQIEKGFHLLNVLGNKIIPHILPCC-                 | 1545 |
| TARDIGRADE      | -----ISHSHTQVSIYSKLRSVVFYTLFPDPTA-                         | 1571 |
| HYDRA           | NEK-F-----SQNTRSRGLVLYDLRSLVINIYDIP-                       | 1506 |
| SALPINGOECA     | DDTPTPQA-GHLSL-----TMLASASKSATOTTRGALFYDTYRTVLAPYIARHF-    | 1549 |
| SPIDER          | ETTEEHS-----KLVVTKGLLVFNLFNLSISLFAVESA-                    | 1558 |
| LIMULUS         | VTDNVLT-PP-----DTYSRGLGLVPLGFAKISRYLAKTA-                  | 1558 |
| SCORPION        | DEQQLYVS-NL-----KTKTRGLIMFSTIQQELISLFAGINS-                | 1560 |
| ROTFIFER        | QNYLE-----QSANVLSYFRABITFQCLAFY-                           | 1552 |
| CIONA           | SNKOVATL-NP-----DVESHRSKGLLPLSTYSLAIYKELCOHP-              | 1569 |
| OCTOPUS         | TEEAHQ-----QN-TSCQGLLILCFKQVSGYIEHA-                       | 1530 |
| CAPITELLA       | NSNNHGV-ST-----SVQCSPHGTLFYAAFVSVNLFVKS-                   | 1570 |
| LIMPET          | NDDMIQGG-TP-----SVN-LQHGEAFFLMSFKVICQYIAENG-               | 1553 |
| SCALLOP         | DQTLVSGS-SK-----GLE-QCHGDLVFSMFKSVIAGHMVAVES-              | 1592 |
| LINGULA         | SK-----TK-----TKN-QNSQNFYAMFQSTINLYLMEKA-                  | 1571 |
| OYSTER          | DESMVEGT-AK-----GYS-QSHGELMPTAFKTTVSVHLAKAM-               | 1564 |
| SNAIL           | DIRIQGL-SL-----GIE-YMLGDHFFTLFKPTISSHVAASS-                | 1572 |
| SPONGE          | SPAQSAG-A-----SFA-AQDGLLLLYITYSGLINNKLLLIH-                | 1578 |
| PRIAPULA        | DDTRLLGV-SA-----KQ-TTKGSMFYSTFGHEINNHVLGMA-                | 1581 |
| DANTO           | NTITLSPV-LS-----GSLNPHFLS-FSHGEYFYSLFTQTSINTELLRSV-        | 1585 |
| ESHARK          | NTMELSPV-LS-----CAQXKMPIT-FSHGEYFYSLFTQTSINTELLRSV-        | 1582 |
| BSHARK          | NTVLSVP-LS-----GASORHPIS-FSHGEYFYNLFPETINSELLRNL-          | 1581 |
| XENOPUS         | NTVLSVP-LP-----GTSORNIIN-FSHGGYPYTLPAETINTELLNLL-          | 1597 |
| STERLET         | NSIMLSPV-LS-----DTSQKNPIT-FSHGEYFYSLFTQTSINSELLKNL-        | 1598 |
| GAR             | NTIMLSPV-LS-----GTSQKNPIS-FSHGEYFYSLFTQTSINTELLGSL-        | 1585 |
| HUMAN           | NPAVLSTA-SL-----GSSQGSVH-FSHGEYFYSLFTQTSINTELLKNL-         | 1575 |
| PLATYPUS        | NTVLSVP-LA-----GTSORNLIS-FSHGEYFYNLFSATINTELLKNI-          | 1579 |
| TASDEVIL        | NTVLSVP-LS-----GTCQKNLIN-FSHGEYFYSLFTQTSINTELLKNL-         | 1582 |
| COELACANTH      | NRVLSVP-LS-----GTSORNFIT-FPHGEYFYNLFPETINSELLRNL-          | 1586 |
| CAECILIAN       | NTVLSVP-LS-----GTSORNIIS-FSHGEYFYSLFTQTSINTELLKNL-         | 1588 |
| CANARY          | NTVLSVP-LS-----EASQQLMN-FSHGQYFYSLFTQTSINTELLKNL-          | 1577 |
| OSTRICH         | NTVLSVP-LL-----GASRKNLNV-FSHGEYFYSLFTQTSINTELLKNL-         | 1547 |
| GECKO           | NSIMLSPV-LS-----GVSRNLIS-FSHGEYFYSLFTQTSINTELLKNL-         | 1586 |
| TURTLE          | NTMELSPV-LS-----GTSORNLIS-FSHGEYFYSLFTQTSINTELLKDL-        | 1586 |
| ALLIGATOR       | NTMELSPV-LS-----EAPRNLIS-FSHGEYFYNLFPETINTELLKNL-          | 1544 |
| APLYSIA         | DKSSVQGA-RK-----NIE-IGHGDFPLTFTSSTLASHIMTSSA-              | 1595 |
| TRICHOPLAX      | DETKLYGD-SN-----SAT-ATLGMVLYTFNSNINAFKAVS-                 | 1558 |
| SOFTCORAL       | NKSLADA-KG-----SS-STVGMVYQTFHNTIEHLLIKNS-                  | 1577 |
| STONYCORAL      | EDSND-----NFG-SSCGCTFYRIFQTSINGFFIERA-                     | 1596 |
| SEA ANEMONE     | NILLI-----Q-----MICFLFSDG-SSVGAVFYTTFQASINTYLIKNA-         | 1568 |
| SEACUKE         | KEDRVN-S-----TTE-IPHCEVYFAAYKSALNDELACQS-                  | 1578 |
| LANCELET        | NKTPMTG-GGK-----KSS-TFQGMVFFSTFKSCICQQLIKTC-               | 1601 |
| STARFISH        | DKTALFSG-RS-----S-TSKGAVFYTTFKTKLNGEMAVQA-                 | 1607 |
| SEA_URCHIN      | ETTPVSS-TRS-----LTSKLSAQ-TSLGVLFITYKQIPMDQLVRHG-           | 1602 |

Supplementary Figure 6 CLUSTAL OMEGA ALL PHYLA, EXPANDED

|                 |                                                         |      |
|-----------------|---------------------------------------------------------|------|
| PARAMECIUM      | -----ESI---GQIYFQY-I-----C-----                         | 1496 |
| TETRAHYMENA     | -----NLI---GQKYLML-A-----K-----                         | 1558 |
| STYLNCHIA       | -----NHFKLNNGEYLIIK-A-----K-----                        | 1540 |
| APHANOMYCESe    | -----QVV---RGLLSHVQ-----                                | 1440 |
| APHANOMYCESe    | -----NVA---VGFMSNIE-----                                | 1405 |
| PYTHIUM         | -----RVA---KLLITDDI-----                                | 1517 |
| PLASMOPARA      | -----RCA---SKLVLSL-----                                 | 1502 |
| BREMIA          | -----RCA---SELASLSL-----                                | 1488 |
| AEDES           | -----PESL---NLILDR-L-----S-----                         | 1574 |
| MIDGE           | -----KETI---QLLVNE-M-----K-----                         | 1531 |
| BOMBUS          | -----EKS1---E1FNLD-L-----Q-----                         | 1463 |
| ANT             | -----RMTT---VVCNDM-W-----R-----                         | 1490 |
| WHIPWORM        | -----TEPI---EEGIRA-F-----E-----                         | 1532 |
| TRICHINELLA     | -----ELFL---KHLKEA-S-----R-----                         | 1540 |
| BEEBLE          | -----DVFP---TY-----                                     | 1460 |
| BARNACLE        | -----A---REAV-L-----S-----                              | 1467 |
| THRIP           | -----HHQT-V-----S-----                                  | 1472 |
| FLEA            | -----PIDA-V-----K-----                                  | 1473 |
| WHITEFLY        | -----FSKA-V-----H-----                                  | 1505 |
| TICK            | -----PAAL---ALAEG-----                                  | 1504 |
| TERMITE         | -----EHML---ACFEHS-V-----S-----                         | 1537 |
| DAPHNIA         | -----TSVL---PFIPOE-G-----                               | 1417 |
| OSTREOCOCCUS    | -----DDYA---TDLLITTS-----                               | 1526 |
| STENTOR         | -----ESSG---GVFINSMAGKPEKMFELVPFLEKAKRLIEAKEVNLTIPLKNFI | 1364 |
| KLEBSORIDIUM    | -----RAL---ERLFSQ-T-----                                | 1654 |
| CLUBMOSS        | -----KKCL---PVLME-S-----                                | 1486 |
| MOSS            | -----KDCL---RLILEA-A-----                               | 1570 |
| LIVERWORT       | -----RDCL---AFILKA-A-----                               | 1593 |
| LIGNANO         | -----QSLL---TILAASPL-----L-----                         | 1627 |
| COPEPOD         | -----QTLV---SKGVQ-----                                  | 1494 |
| GLOBOSUM        | -----CSYP---SSFIKS-M-----R-----                         | 1453 |
| PALUSTRIS       | -----DQVY---DFPEKH-L-----Q-----                         | 1510 |
| NEOCALLIMASTIX  | -----E1FN---KYLSPC-I-----S-----                         | 1581 |
| GLOMUS          | -----REFA---KIFFDN-I-----N-----                         | 1633 |
| LOBOSPOR        | -----VELS---PVISCA-A-----                               | 1554 |
| SYNCEPHALASTRUM | -----KAPA---PILLED-I-----E-----                         | 1539 |
| FUNCTIONORUM    | -----AVMA---RVLASK-I-----                               | 1535 |
| HALBUM          | -----ESFS---PLPIDR-I-----                               | 1677 |
| DPURPUREUM      | -----ELFL---PLLNR-I-----                                | 1682 |
| PVIOLACEUM      | -----ESFL---TLLANI-V-----                               | 1674 |
| AMPHIPOD        | -----SYAV---QRCVQL-A-----Q-----                         | 1572 |
| SHRIMP          | -----DDAL---SRCVEM-I-----R-----                         | 1562 |
| MUDCRAB         | -----DLIV---TTLLEL-V-----K-----                         | 1557 |
| TARDIGRADE      | LRSSDQRQLFF---YGLIGDA-----E-----                        | 1592 |
| HYDRA           | -----LSL---QKGFND-S-----                                | 1516 |
| SALPINGOECA     | -----KVFA---EQLLPH-V-----                               | 1560 |
| SPIDER          | -----ENFV---KTIASN-L-----                               | 1569 |
| LIMULUS         | -----NPSL---SLLVEN-A-----                               | 1569 |
| SCORPION        | -----KHF1---SSLMNN-I-----                               | 1571 |
| ROTIFFER        | -----SDIL---DFLSK-L-----                                | 1563 |
| CIONA           | -----ALYI---PLITNH-T-----C-----                         | 1581 |
| OCTOPUS         | -----AELI---PLIMAK-S-----                               | 1541 |
| CAPITELLA       | -----EKFV---PLIMRH-L-----                               | 1581 |
| LIMPET          | -----RTII---PILTNQ-A-----                               | 1564 |
| SCALLOP         | -----DMCV---KSLATR-A-----                               | 1603 |
| LINGULA         | -----KYFI---PELVNY-A-----                               | 1582 |
| OYSTER          | -----AQAV---PVLCEH-A-----                               | 1575 |
| SNAIL           | -----DVV---SLLMKN-A-----                                | 1582 |
| SPONGE          | -----KMAI---DVLKLN-A-----                               | 1589 |
| PRIAPULA        | -----TVLI---PKVLDK-I-----                               | 1592 |
| DANTO           | -----DRSV---PILLS-S-A-----                              | 1596 |
| ESHARK          | -----KSAV---TQLMKS-A-----                               | 1593 |
| BHARK           | -----NSAV---AQLMKS-A-----                               | 1592 |
| XENOPUS         | -----DTIV---VELMKS-S-----                               | 1608 |
| STERLET         | -----DTTV---AQLMKS-A-----                               | 1609 |
| GAR             | -----DSTV---POLMSL-A-----                               | 1596 |
| HUMAN           | -----DLAV---LELMQS-S-----                               | 1586 |
| PLATYPUS        | -----DTAV---LELMKS-S-----                               | 1590 |
| TASDEVIL        | -----DTAI---LELMKS-S-----                               | 1593 |
| COELACANTH      | -----STAV---SOLMNS-A-----                               | 1597 |
| CAECILIAN       | -----NTAI---LQLMKS-S-----                               | 1599 |
| CANARY          | -----DVFI---VRLMKS-S-----                               | 1588 |
| OSTRICH         | -----DVII---LQLMES-S-----                               | 1558 |
| GECKO           | -----DVAV---LHLLKS-S-----                               | 1597 |
| TURTLE          | -----DVAI---LQLMKS-S-----                               | 1597 |
| ALLIGATOR       | -----DVAI---LQLMKS-A-----                               | 1555 |
| APLYSIA         | -----REIV---RSLMTH-A-----                               | 1606 |
| TRICHOPLAX      | -----NRCL---PMLLDL-A-----                               | 1569 |
| SOFTCORAL       | -----SEHL---PKILEY-N-----                               | 1588 |
| STONYCORAL      | -----NIMH---ANILMK-A-----                               | 1607 |
| SEA_ANEMONE     | -----QSHI---POLVSM-A-----                               | 1579 |
| SEACUKE         | -----QHSV---RALLKE-G-----                               | 1589 |
| LANCELET        | -----AESL---PVLLOQ-L-----                               | 1612 |
| STARFISH        | -----QKVI---PLLVRE-G-----                               | 1618 |
| SEA_URCHIN      | -----QDTV---YELSNR-V-----                               | 1613 |

Supplementary Figure 6 CLUSTAL OMEGA ALL PHYLA, EXPANDED

|                 |                                                             |      |
|-----------------|-------------------------------------------------------------|------|
| PARAMECIUM      | -----KETHLFRQGIIL--LVNKPQNV-----HHFKFPQ--                   | 1525 |
| TETRAHYMENA     | -----DNISLLKLTIP--LLQSI IQSFNRK-----EKESLILLIQN-            | 1593 |
| STYLNCHIA       | -----DEPSLYAVPIP--ILEKLSOKTP-----NYYKILLRS-                 | 1570 |
| APHANOMYCESa    | -----THPSF-IHTLHH--VLELTSSNNKML--SKRTELAPLVAPFAK-           | 1479 |
| APHANOMYCESa    | -----NYESCALNTFOR--VLEA-----NP-----KSSDGLAPVNDFAKY-         | 1439 |
| PYTHIUM         | -----T-TQRL-VGLVE--LLTEVASLKVHP--AGSSEMDFVDFLPH-            | 1555 |
| PLASMOPARA      | -----E-NDFVVNVLID--ILRQVACSKVYL--RKSAEWDAFTATLVAA-          | 1541 |
| BREMIA          | -----D-NDFVVNAFLD--ILRQVTSFKVYT--PRSDADWMTFKTLPN-           | 1527 |
| AEDDES          | -A-----N-N--FIAIVKWCN--FLEFLYQRKA-----EVP-ALKSVSEFLAK-      | 1613 |
| MIDGE           | -T-----T-NDTNRLRIVAVLSE--LNDYIFKHCTD-----NKE-LLDVNLQTMIKH-  | 1573 |
| BOMBUS          | -R-----DPSTLLMHEQ--LFLVQRK--E-FHD-CVEVLVDTVIKK-             | 1501 |
| ANT             | -D-----NSSFLKWTED--LLEFLRQHKR--E-LOA-HVMTVDVILIQ-           | 1528 |
| WHIPWORM        | -D-----NDEEPIQLCS--LLSCV-----VRSADL-RKC-YGSRIVDDVSL-        | 1570 |
| TRICHNELLA      | -C-----QPDVVGRAFPH--TVSVV-----VHSSDL-RKK-YGRELALQILQI-      | 1578 |
| BEEFLE          | -CLEYKDK-----IDKTVE-FIFYIL--RCIGLNK-HFK-TQHGIVNIVLTN-       | 1501 |
| BARNACLE        | -PLVSR--AAAHPRGVLTAVRT-----TAADRQL-RRQ-HGAPLARLLAEG-        | 1511 |
| THRIP           | -ALAEHLTPVSPQH--LTLILSS--IL--RWRCSVST-TRY-HLMQTVACLFSK-     | 1518 |
| FLUA            | -KTTITNLGDA-SPIKRHIVDFLIQ--ILYIYRNEK--E-NEF-LISNISETMLNH-   | 1522 |
| WHITTEFLY       | -HLITPDKI--HADILLAIMKE-----HECSPP-N-INO-RNSELVKCIFQK-       | 1546 |
| TICK            | -----APKMLTVMMSH--ML-----QDKE-L-TSR-RGSELSLEVMR-            | 1537 |
| TERMITE         | -CLIKDISAN--NVQWVISTVTE--ILQYAKIRKSKH-Q-DST-TCAPERSIVNH-    | 1586 |
| DAPHNIA         | -N-----GDSQQWALLLELQA-----ANQTO--R-----FSDKRKWI VQNVLDS-    | 1454 |
| OSTREOCOCCUS    | -A-----DVTSAAGRVATDILG--VVDRAST--LQCGGRMSLNGVIGRNAIEKMI     | 1573 |
| STENTOR         | KQTTPLFATLALVSPFSMGI TRAYCIPMBAKDL-SINFG-----THPF           | 1406 |
| KLEBSORIDIUM    | -----PRKTBALIGA--ILSHYLAG-----DKLSRASVDQMAAN-               | 1690 |
| CLUBMOSS        | -----VRNETARLILHA--VLDEY-----QG-----ETITKGSVFGEFLH-         | 1520 |
| MOSS            | -----AEKQAARMLLIA--LLDSYLPKSEMG--ASITKSFMQEFLQH-            | 1609 |
| LIVERWORT       | -----VGNRTARLLINA--VLDDIKSIEQG--SSLSRDFILKEMILH-            | 1632 |
| LIGNANO         | KAATAPATAAATARLPALAAILES--LAASV-KRTALSKQGC-ADDTPKQLASQILAK- | 1682 |
| COPEPOD         | -----SGDILQSVQMLVNIILNRKQP-----GLGKELISHVMQH-               | 1528 |
| GLOBOSUM        | E-----G-----VEASFAIVLIDN--FLNWIE--TAE-----SKSEVEIFVGHAIADS  | 1492 |
| PALUSTRIS       | H-----P-----IVHTIL-LGIPD--YLI-VN--RTS--KADECRAPMDQFVKHS     | 1547 |
| NEOCALLIMASTIX  | E-----NIVTDIIND--CIDLINDYKSI--NEKIKSKFLIQISNQI              | 1619 |
| GLOMUS          | D-F-TRDQ--MNIDIKDLIN--LIDYLSKKT--QOSVEFLIHLNSEF             | 1676 |
| LOBOSPOR        | -----VLAIWND--FLDYMSHPE-L-----S-TEKDTFLDMLTKDY              | 1592 |
| SYNCEPHALASTRUM | GDF-MPR-----VII--G--LVEYLKDNKRTL--A-KEINCFTELVS-S           | 1575 |
| FUNCTIVORUM     | -----AQSLAVRIVLVSHTASKL-----THPF                            | 1559 |
| HALBUM          | -----VQTNHIDPILNDICIKYQTIQPNNTT--DKQSKNDKMSIMIPF-           | 1719 |
| DPURPUREUM      | -----IHTNHIIKVLNDVICILKQKQNEK--S--NM--SKD-IQSVINP-          | 1718 |
| PVIOLACEUM      | -----IQTNSIHKILNDICILKQSLSSOKLI--NP--KKE-ILSILGF-           | 1712 |
| AMPHIPOD        | -A-----GGWKAVALLLS--LARTLKDLSALR--KK-YSEELVRGVETT-          | 1611 |
| SHRIMP          | -E-----GRFLPAMGFASA--LITCLIRNADIR--KK-YSVKVVQSFLLK-         | 1601 |
| MUDCRAB         | -E-----GKFLVMSFNGM--LLNTLIRNSELR--KK-HSVKVVQAFLLH-          | 1596 |
| TARDIGRADE      | EHA-----GTWRSRHAVLKD--ALEYVCRNRPAR--KR-YETLEKLVMSQ-         | 1633 |
| HYDRA           | -E-----TLYSVHLLIQDI-LAEYVSKK-----SSVKNVQOFTFQ-              | 1551 |
| SALPINGOCEA     | -G-----D-G-RVYRLVHDA-ARALVTGDTM--RR-YADEFFTAFLDG-           | 1597 |
| SPIDER          | -N-----HQLFNEISILLK--FIDCVACSKILR--KK-HGKQVDAFLNN-          | 1608 |
| LIMULUS         | -K-----KPKVVPVPSILG--VLDIFSSNNKIR--KE-VGTAVVESLFS-          | 1608 |
| SCORPION        | -N-----KSKTIVLILVIG--LLDSIGKVKFR--TR-YGKDIINSIMCQ-          | 1610 |
| ROTIFFER        | -S-----SKFSKLOFLIN--FVEFIMQKHLR--KT-MQKLLKRVFES-            | 1602 |
| CLIONA          | -K-----ADASTCNPIITG--VLDYLATNRHAR--KO-HAASVCDLILCQ-         | 1620 |
| OCTOPUS         | -D-----SNSQIVGHILIS--VLDI-LKHKSFR--WK-HASQVCDIILKN-         | 1579 |
| CAPITELLA       | -E-----ANGETLSSVLIG--IAESVISDRPLR--KS-HGKMSRAIVSQ-          | 1620 |
| LIMPET          | -K-----THGRKVNILGA--TVDYIARDRTL--KK-EGPNVASTILSE-           | 1603 |
| SCALLOP         | -G-----ADGRKVSRLVA--MVDHVTRDKALR--KR-IGQNVKSVLMQ-           | 1642 |
| LINGULA         | -S-----KESVSVSVLSS--LLEQISDRDQLR--GG-EGKTVVDVVLSC-          | 1621 |
| OYSTER          | -Q-----KQCYRVMSILVT--MVDTVSKDKNLR--KQ-ISANVTVSVEK-          | 1614 |
| SNAIL           | -T-----VDPHRVSNVLA--MLENVAQDRIR--KS-NGPRIVDMVASK-           | 1621 |
| SPONGE          | -K-----THPQQVSVILNL--LLEYVQKDFKINNNNNEK-TVETLCTELISH-       | 1633 |
| PRIAPULA        | -N-----NRESVMTILTD--LLDQVGDRETR--KR-YGSGVNVTVLQC-           | 1631 |
| DANTO           | -N-----QNPMSVSVLLNG--MLDHSFRERSVR--KS-QGSQLABQVLKG-         | 1635 |
| ESHARK          | -S-----ENPKMVSIVLNG--MLDQSFDRHTVR--KT-QGVLVSAVLTN-          | 1632 |
| BHARK           | -R-----ENPKMVSIVLNG--MLDHSFRDRHTVR--KK-QGIYLVSAVLSN-        | 1631 |
| XENOPUS         | -L-----EDPKMVSIVLNG--MLDQSFDRHTVR--KQ-QGVKLVNAVLEN-         | 1647 |
| STERLET         | -A-----ENPKMVSIVLNG--MLDQSFERSVR--KT-QGSQLVGVGLGS-          | 1648 |
| GAR             | -A-----ENPKMVSIVLNG--MLDQSFERSVR--ES-QGRQLVKRVTAQ-          | 1635 |
| HUMAN           | -V-----DNTKMVSIVLNG--MLDQSFERRANQ--KH-QGLKLTATILQH-         | 1625 |
| PLATYPUS        | -V-----DNAMVGTILNG--MLDQSFDRDRVR--KQ-QGKLVDAILLQ-           | 1629 |
| TASDEVIL        | -V-----DNAMVGTILNG--MLDQSFDRDRVR--KQ-QGKLVDAILLQ-           | 1632 |
| COELACANTH      | -A-----ENPKMVGAILNG--LLDQSFRRNTRVR--KQ-QGSQVDTVVLQ-         | 1636 |
| CAECILIAN       | -V-----DNPRMVGITILNG--MLDQSFDRDRVR--KQ-QGKLVDAILLQ-         | 1638 |
| CANARY          | -I-----SNPQMVGSILNG--MLDQSFDRDRVR--KQ-QGAKLVAVLNR-          | 1627 |
| OSTRICH         | -V-----SNPQMVGSILNG--MLDQSFDRDRVR--KQ-QGKLVAVLNR-           | 1597 |
| GECKO           | -L-----DSPRMVGTILNG--MLDQSFDRDRVR--KQ-QGKLVDAILLQ-          | 1636 |
| TURTLE          | -V-----DNPRMVGITILNG--MLDQSFDRDRVR--KQ-QGKLVAVLNR-          | 1636 |
| ALLIGATOR       | -V-----DNPRMVGITILNG--MLDQSFDRDRVR--KQ-QGKLVAVLNR-          | 1594 |
| APLYSIA         | -S-----KEPRCVSRVLLA--VLDHALKDRSLR--KK-EGVAVCREMVS-          | 1645 |
| TRICHOPLAX      | -A-----SKSPMISGILSG--LLDFILDRGLR--QS-KGIHISKILSS-           | 1608 |
| SOFTCORAL       | -R-----DEAQVSSVTVIA--LLDSMVKDKELR--KM-NGRKMTTVLLES-         | 1627 |
| STONYCORAL      | -A-----SSPFLVLSLLNG--ILDQVIRDKILR--TR-NGSSFVAVLLNN-         | 1646 |
| SEA ANEMONE     | -T-----SYSSHVCISILNS--ILDQFNDRKTSR--KR-YGSVVCASIVNS-        | 1618 |
| SEACUKE         | -G-----T--RVMGILNG--LLDQILSNRNRQ--KR-YGMVVHSALLTH-          | 1625 |
| LANCELET        | -T-----AEPVWVGSILHG--LLDHLAKDKTLR--KK-EGAALCDSLLQS-         | 1651 |
| STARFISH        | -G-----KDVTVVSSVNLG--LLDYLTSSREVR--RT-HGMSVSAILTQ-          | 1657 |
| SEA_URCHIN      | -R-----EDRGTIGMIYIG--LLEHAVGNREIR--KR-YGMAYSAVLTQ-          | 1652 |

Supplementary Figure 6 CLUSTAL OMEGA ALL PHYLA, EXPANDED

|                 |                                                           |      |
|-----------------|-----------------------------------------------------------|------|
| PARAMECIUM      | -----KVNRENSAL--LLEIQTINIV-----LNQT--K-----N              | 1551 |
| TETRAHYMENA     | --LPIV--NIRKEDTF--LEIELKINWLI--MSSIBGLVI--E-----K         | 1628 |
| STYLNONCHIA     | --VPEV--WNEQERTDF--TEFEVATSKVIYTFIANACQVQL--R-----D       | 1609 |
| APHANOMYCEsa    | --VLH--AT--TE--KEQP--LIMSTLLFVRSILDKS--T-----L            | 1509 |
| APHANOMYCEse    | --ALS--TA--AK--DQS--SLKILKQVFNFDQVK--S-----L              | 1468 |
| PYTHIUM         | --LKSM--IGKMADEGN--DAQTRLCLESIRQTVDFIKKCSRRMADVLDL--G     | 1601 |
| PLASMOPARA      | --VKQF--INKLETVKK--ETQPALSLLQILKHFVELSQNCSTVVEALRL--G     | 1587 |
| BREMIA          | --AKHF--VDSLDAFKA--NTQRALSLLQVLYYILELWLHCSASFIALCTI--D    | 1573 |
| AEDES           | --API--CDRASEIDNK--FGSTDLRLVFPMSNLA--MASPFA--LSEIG--R     | 1655 |
| MIDGE           | --PIT--YQISQEMDNN--LNSVDLAINLITRMA--LTSPIE--LHELG--N      | 1615 |
| BOMBUS          | --TIF--ESVINNLEDR--RQ--KLINILGLAVHLK--HKPIE--VS-----S     | 1538 |
| ANT             | --TCL--ANAVFVDSR--KE--RLNLYSVAHLK--SKPTE--AT-----         | 1564 |
| WHIPWORM        | --CNLK--MNLWADVSCS--SENLLKLVKLVKMLL--LINS--KIDNW--P       | 1610 |
| TRICHIANELLA    | --GQB--LLYVADVVS--NETLKMLKMLKMLLI--LIDS--KITEW--P         | 1618 |
| BEEBLE          | --DIF--EEFNE--SLS--NIQLGYLKLKFNPTI--KS--SRLQC--D          | 1538 |
| BARNACLE        | --QQL--ES--A--SEPALVQLGLLLLVH--LPLV--GE-----D             | 1541 |
| THRIP           | --DKF--IFWANA--DPC--KEAWLISLNIQIV--ELDI--DFHSV--E         | 1554 |
| FLEA            | --NDI--VQHVTE--SDA--VD--LVTYLGIIVPSN--VV--G-----          | 1553 |
| WHITEFLY        | --DII--QIYGNK--YDN--SYARMSTVLDLMLALVK--TFKNRV--GCPRS--P   | 1588 |
| TICK            | --VPM--ERFWE--G--T--SQDVVNGALHMLEKLV--LLAPEV--GSPRG--P    | 1577 |
| TERMITE         | --WNKL--SSFVEG--N--SEQVY--QLGLVVNLARIMPOPR--GLARC--E      | 1626 |
| DAPHNIA         | --KVL--KKHA--E--SYRQHFNLLINCLASIDIVD--G-----              | 1487 |
| OSTREOCOCCUS    | SHRLHL--YEDHDSATA--EMRNTVCHQRPLTIIRKVTMLDANLR--IDESI--A   | 1619 |
| STENTOR         | --LHEL--Q--NBEFBNHVTLLERKFMARQAFVW--KKESE--H              | 1441 |
| KLEBSORMIDIUM   | --LRYL--QRWT--EPE--A--SLEEKRAFIYKGLVVDGGDP--RLAQ--P       | 1732 |
| CLUBMOSS        | --LTEL--RPCY--LDG--S--SVTDKQFIAGIHKLLVLVDKAS--V--VGGSO--P | 1561 |
| MOSS            | --LEVL--APLC--RAG--S--SLTRLRFLDILHKLMLDGTGDVV--LNIKY--S   | 1652 |
| LIVERWORT       | --LKCL--HPCC--ASY--A--GLADKQFPLIELQRVLLDLRSEN--LQHDQ--S   | 1675 |
| LIGNANO         | --WTLV--QQLW--DYG--NDDCRFSVLGILTNLAVDAELV-----K           | 1717 |
| COPEPOD         | --NSV--KGI--N--NSRTLLRTI--FLRLSLSKV--AEFKD--E             | 1561 |
| GLOBOSUM        | SFVTSI--ISFY-----Y--RTGEHSLRFWRKFLKISSVTL--AISEE--N--A    | 1532 |
| PALUSTRIS       | AFLTKV--VREY--N--SGNT--LQLLKKVQLDPKVL--ARTAT--S--D        | 1584 |
| NEOCALLIMASTIX  | DFIKSY--LSFH-----L--DKKNFYIIDFPKLPKLDNQFI--DKYAS--S--I    | 1660 |
| GLOMUS          | YFLKSF--VKIC-----T--YD--RHYLKLWNLFMLEPNLL--RRFSL--E--E    | 1715 |
| LOBOSPOR        | STLESI--VNYL-----G--RDQISMVAIWKRLVALSPRIL--R--NSKTD--T    | 1632 |
| SYNCEPHALASTRUM | SFLKDL--IARW-----K--SQPKLLMAFLKGLFGADPGLL--YRTANG--H      | 1617 |
| FUNCTIVORUM     | --LHEL--FRSNQLMEHLS--SQSTHRENAVQARAIQI--GVV--KOSSE--H     | 1603 |
| HALBUM          | --LHK--SSH-----LKD--VGKTTDKENIIEFTKNLINDPTPF--FETKE--P    | 1760 |
| DUPURPUREUM     | --PKEI--SEWT--LNP--NLKIVEKENIVEIKNLKINPLQF--FENQO--D      | 1759 |
| PVIOLACEUM      | --LEKI--KQWS--LSN--NLKIVEKENIVEFTKNLIKIEPIVF--FETQO--D    | 1753 |
| AMPHIPOD        | --WTL--ATYG--STSDLVSNCSSTDLVSLMSLLMLVDQGRV--VAERCNAAPPA   | 1659 |
| SHRIMP          | --PTL--AAQA--GKTSLHQ--DSVLSLSSLFLIDREGT--IKSHCTSS--D      | 1642 |
| MUDCRAB         | --STY--STA--GKSSIHQ--ESVLDLSSLFLVDREGT--MKAHCSAE--D       | 1637 |
| TARDIGRADE      | --GSF--VEAR--PDEVKMDTVRSVLGVIKLLLSQKT--LKTGD--A           | 1675 |
| HYDRA           | --LKV--PEKL--ATG--IRFETQIQVLDIFILILN--VPE--G--T--L        | 1587 |
| SALPINGOEA      | --LHV--RTWI--NSA--GAGSETHVQRVRSVAVVRCVGRPE--TAQRH--A      | 1639 |
| SPIDER          | --NSV--CVWW--RDH--PDIDSI--YSVLSLMTKMLLIDSKVA--LINESN--Q   | 1649 |
| LIMULUS         | --GKL--NHWV--SNA--ADEDDLNNVLLLTKLLIDPAVV--TSCSL--P        | 1650 |
| SCORPION        | --SRL--QOCL--EES--CDI--DLQNDIITLITRMLIDSSFI--KGNV--Y      | 1651 |
| ROTIFFER        | --PKF--EPYV--SFE--S--QFKLMSLTKMLIESP--Q--P                | 1635 |
| CLIONA          | --DKN--LKPWI--NTD--E--DNDLNNLLTLRKLIMLDSVVC--TKPNH--P     | 1662 |
| OCTOPOUS        | --NMI--ENWW--RDD--A--SEDTQRITFDILLGILRLDSKVL--SDGQN--P    | 1620 |
| CAPITELLA       | --SSL--SVWV--SES--TASLDTKMVAITLLTKLMQIDSTVI--IDVKN--K     | 1662 |
| LIMPET          | --WKF--STWV--TNN--A--PPELQNLASLLTKVLLIDSRVT--SHTSH--P     | 1644 |
| SCALLOP         | --WKT--AGWC--DSK--S--SIDLQSMTLLLTKLLIDSKFV--STPSS--P      | 1683 |
| LINGULA         | --SQLQOQWV--APD--S--PQEVKMSALNLLRKMILINGKVV--SDPTH--P     | 1664 |
| OYSTER          | --WKT--SSWC--LA--T--PELHSM--AMLLTKVLLIDSKV--TDSSS--G      | 1653 |
| SNAIL           | --HHL--ESWV--QAG--S--SDLQGL--AVLLTKVLLIDSKAV--LNVK--S     | 1661 |
| SPONGE          | --QDL--SLWV--EDG--S--KDLKSAVTLQKIALKPKLL--LKSAD--D        | 1672 |
| PRIAPULA        | --GHL--RDWL--VAT--S--TPDRKMLMLLKRKLLIDSSVA--TKGSH--S      | 1672 |
| DANTIO          | --DLL--RPWV--DGP--AATPESKTSVLLAKVQLIDSSVC--SNTSH--P       | 1677 |
| ESHARK          | --TRL--ESWV--SEN--S--SAESKMAVLLSKVQLIDSSVS--FNVNH--E      | 1673 |
| BHARK           | --AKL--DSWV--SVK--S--SPESKMAVLLSKVQLIDSSVS--FGNSH--D      | 1672 |
| XENOPUS         | --RRL--DSWV--YKD--S--PESKMAVLLAKVQLIDSSVC--FDINH--S       | 1688 |
| STERLET         | --TSL--QSWV--ASS--S--SAESKMAVLLSKVQLIDSSVS--FNTSH--L      | 1689 |
| GAR             | --SSL--GSWV--SSP--ASTSEKMAVLLSKVQLIDSSVC--FNVNH--E        | 1677 |
| HUMAN           | --WKC--DSWV--AKD--S--PLETKMAVLLAKVQLIDSSVS--FNTSH--G      | 1666 |
| PLATYPUS        | --WKL--DTWV--AED--S--TPESKIAVLLAKVQLIDSSVS--SNTNH--A      | 1670 |
| TASDEVIL        | --WKL--DTWV--AKD--S--VPESKMAVLLAKVQLIDSSVS--FSINH--G      | 1673 |
| COELACANTH      | --WKL--SSWV--IRS--S--SPESKMAVLLSKVQLIDSSVS--FNPNH--A      | 1677 |
| CAECILIAN       | --WKL--DSWV--DKN--S--APESKMAVLLAKVQLIDSSVS--SNAHH--E      | 1679 |
| CANARY          | --EKL--DGWV--AKG--S--SAESKMAVLLAKVQLIDSSVS--FNTNH--E      | 1668 |
| OSTRICH         | --WKL--DSWV--AKG--S--APESKMAVLLAKVQLIDSSVS--FNTNH--E      | 1638 |
| GECKO           | --VHL--DWRV--TRD--S--APESKMAVLLAKVQLIDSSVS--FSTQH--E      | 1677 |
| TURTLE          | --WKL--DSWV--AKD--S--APESKMAVLLAKVQLIDSSVS--FNVNH--E      | 1677 |
| ALLIGATOR       | --MRL--DTWV--AKD--S--APESKMAVLLAKVQLIDSSVS--FNTKH--E      | 1635 |
| APLYSIA         | --REV--GSWV--GAD--S--SAETQGLAVLVLTRVFLIDSQPI--KEL--G--P   | 1685 |
| TRICHOPLAX      | --NSL--KCVW--LTP--D--AQDLLQIVNINLTKLIDPOFA--TQSDN--S      | 1649 |
| SOFTCORAL       | --WERL--SHWV--ENG--G--E--ELKRSAILIRNLIIVDPKCL--SEVKS--D   | 1666 |
| STONYCORAL      | --TSP--EIFW--RTH--S--AMDLRHSILMLKMLLIDPAKV--TDCNR--L      | 1687 |
| SEA ANEMONE     | --EVF--SSLW--DMS--S--SSELKQALLEIMKLLIDSPKCL--IDPAK--P     | 1659 |
| SEACUKE         | --GAL--ARD--K--SPDAQRAALLLKLKLLIDSKFV--MDVSH--V           | 1662 |
| LANCELET        | --PKL--APWV--EEG--A--LQDSKSTALTLRKLIDSKV--RDPAH--P        | 1692 |
| STARFISH        | --WDL--MGGL--KKG--C--STDLSQFALLMLRKLIDSKV--SDPTH--P       | 1698 |
| SEA URCHIN      | --WDL--SNL--GQEDDFMLNLMKRVQLIDSKV--TDPH--P                | 1687 |

Supplementary Figure 6 CLUSTAL OMEGA ALL PHYLA, EXPANDED

|                 |                                                            |      |
|-----------------|------------------------------------------------------------|------|
| PARAMECIUM      | INREYVKGLLK-----DGLNTGRSIEIHDALIIPLGLYIKHID-----           | 1589 |
| TETRAHYMENA     | NYSDDVVEKLIIE-----VSLKVKESLFIHQGFNLGPFYKLCI-----           | 1665 |
| STYLONCCHIA     | RSNHYAIIKIDHLC-----EKVSKYLKERYPVHIIKREVLNLVGMIIYLETQ-----  | 1655 |
| APHANOMYCESa    | PLVDCATAGNQLLC---DP-ST-----SVGVVAALQILPVLIIQA---NATE       | 1549 |
| APHANOMYCESa    | ALFDCALGKQVLC---DK-SK-----AASLKVDMHIIPHLKFI---SP-D         | 1507 |
| PYTHIUM         | PPDMDRAITVTLK---RR-EI-----SSSAGDCLSLIAGLGTALS---AE         | 1641 |
| PLASMOPARA      | PILDIQNACSILLK---QR-GC-----SYLVKADLLQILGLLGPSSILATKERQ     | 1632 |
| BREMIA          | PILDIQNAVTRLLK---ER-GC-----SYLVKANSLRLRLGLPTSVLVSSSEQ      | 1618 |
| AEDDES          | KAAGFERWLLPLIA---NA-QN-----SLDLKAKAMFLIPAL--VGDS---DFE     | 1695 |
| MIDGE           | RLENLQIWLFFNFQ---NR-NY-----SPELKSQGVFLIPCV--ASSN---DTA     | 1655 |
| BOMBUS          | LSKDFYMWLNQML---D--NL-----DIEKYIYLIHHLV--CLTDM---TPT       | 1577 |
| ANT             | QNHFYQWERDQLM---N--NN-----DLEKYIKLIRKPFV--CLTIV---TOP      | 1603 |
| WHIPWORM        | CASSIFRCFKLLN---DQ-SL-----CLGPFNQMLALLAFAFCCCEK---E        | 1649 |
| TRICHIANELLA    | EFAPMASAFMMLN---DQ-SL-----TLDPFNRMLSLILAGFCTPDR---H        | 1657 |
| BEEBLE          | NLKKWLLWLVLYET---NVMWRE---EPFLKIEITIDLSOILD--N--LDE        | 1579 |
| BARNACLE        | QAASPVAVITRLD---GD-RL-----TLEQKRPALRLITAMLRSAT---L         | 1580 |
| THRIP           | NVTHICSWIKLLT---DS-SR-----TLSLTDLLVCLPIVCSIS---E           | 1592 |
| FLEA            | PINYLAEWMLKLM---NT-TV-----SLDTKSKVLDVLPFI--TGPK---DIE      | 1593 |
| WHITTEFLY       | EAVGIKWMELQLG---K--DI-----DVNLKFSILOFLVALFNPQSQ---RDA      | 1629 |
| TICK            | HFERLFGVLLKLE---RS-GA-----TLADKVLVLDLVPV--ASDIR---PDT      | 1618 |
| TERMITE         | ALQK---WVITQLT---SR-DL-----QLHYKSRALDILVCL--AGPO---EDT     | 1663 |
| DAPHNIA         | RNSDVQWVIGCWV---Q-RT-----DVTLASDLVQLNVFIVDCSE---SEE        | 1528 |
| OSTREOCOCCLUS   | SNDTIVSGLMRCVY---ND-CI-----ALSSHVDIAI---ITCD--VLQ---DHR    | 1657 |
| STENTOR         | LIAISREFFGIEIY---K--KIPCFE---K--KIPCFE---IQ-----           | 1466 |
| KLEBSORIDIUM    | RAKVYVPAEAFLSQPAAPG---EN---ESEGLRVSLKREALGLPFFLGPVAD---GET | 1784 |
| CLUMBOSS        | AFQFILLEVFAFLSATTLGV---WSECAMLRKKSALLNPPFFLESMD---SSL      | 1608 |
| MOSS            | SDFITETLSFLSCSSED---ATNSRLGSSAAPTIRTTSMRLLPFFFSANVD---SGV  | 1705 |
| LIVERWORT       | SRSFIQESLSCIDGAENAG---DSIDGSRDKEASITLKHVFLVPLFPKPTFG---QEF | 1730 |
| LIGNANO         | SNDQVFLVGVLN---S-RV-----NFDLIVNGLALGYMCR--NP---STE         | 1756 |
| COPEPOD         | NTKPAVSWCNLLK---NP-SI-----ELKVYKGFQILGLMLQ--CT--D--        | 1599 |
| GLOBOSUM        | LSQCWFSEFLNPN---H-RS-----SLKALSDLFDLPL--VM--VA--N--        | 1568 |
| PALUSTRIS       | FCTVPTDAVTLLD---V-AN-----PLATITDALNLLPAPLL--VP--S--        | 1621 |
| NEOCALLIMASTIX  | CKDEPCKILSLE---P-SI-----NLKVKSESLDLPFFDS--LL--TNN          | 1699 |
| GLOMUS          | FQNLFRENEAFLD---K-QI-----DLEFKNEALDLPFFYK--SD--L-P         | 1753 |
| LOBOSPOR        | FVQYFFKIQSFFE---R-DP---DKREYLLPVMSEAFPILPVFLT--YP--G-Q     | 1676 |
| SYNCEPHALASTRUM | TFDVFDAIRALD---R-DA-----PLSVMEAFVLPVYLT--VQ--A-E           | 1655 |
| FUNCTIVORUM     | GLQWMLKRMMS---R-SI-----PLSKMQLVLELPCICV--NQ--KH--          | 1641 |
| HALBUM          | GYDFVQLLNYLN---R-SN-----SLAFYKALVLLPDLLL--FP--KHH          | 1799 |
| DPURPUREUM      | CYDFVYNIITNYLN---R-SN-----PLPFYKXVLLVLLPYLLS--FP--KHH      | 1798 |
| PVIOLACEUM      | GYYVYSIVNYLT---R-SN-----PLSPYKXVLELVPYLLS--CH--KHL         | 1792 |
| AMPHIPOD        | PPCQLLEFLRTVA---DP-KT-----ELQVKITCLOLPLFCA--LN--DHV        | 1699 |
| SHRIMP          | -RSDMVVFNGLLA---DA-KV-----ELQAKIKVLLKLPFFFT--MG--EDI       | 1681 |
| MUDCRAB         | -DAGVLKFRRLR---ED-KA-----TLSMKNKALKLPFFFT--MS--KQV         | 1676 |
| TARDIGRADE      | EVKKLYDFISVLLTPIASD---PQ-----GAATKNRALTLAAFLD---GAN        | 1717 |
| HYDRA           | KDLPFLANLIEVLF---DS-KN-----SLAVKEKVISCHPHIFPK--GS--SQQ     | 1628 |
| SALPINGOBECA    | NFEQVLEVKRFLI---DR-AV-----DMTSKRVALQLGLPCK--GT--QHV        | 1679 |
| SPIDER          | FMSILPTLMTLS---KE-NN-----TMDFIYHALDILPFFCESSTS---SEN       | 1691 |
| LIMULUS         | YDQSLCSVLSLLT---RK-GI-----SLSPYGHVLDLAPFFKXNMT--N-K        | 1691 |
| SCORPION        | DSNSIFFSITLLQ---KS-EM-----SLEFKICVLDLAPFFLDAFL--C--        | 1691 |
| ROTIFFER        | RNEKVFQMFELT---DE-KS-----MLNFKRVLLDLPFFFT--SP--K--         | 1673 |
| CLIONA          | CHSTVFTITSTIS---SN-KL-----DLSFYKQVLDLSPFFLT--S--STH        | 1701 |
| OCTOPUS         | TCELLHKFYLLS---KK-TV-----ASSPKVSLDLPPLSV--SP--EPH          | 1660 |
| CAPITELLA       | SFYVFKMLGLIS---DK-NN-----TLQFKTRVLDLIPFCN--LP--AEE         | 1702 |
| LIMPET          | SFSTIFEMQMLV---DN-KT-----NLAFAKXVLDLAPFFAM--AQ--ETY        | 1684 |
| SCALLOP         | SFEDVFGTLQCLT---DT-RT-----NLAFAKXVLDLAPFFIN--VP--KPH       | 1723 |
| LINGULA         | SFSCVFSMSLMT---DT-KS-----SLLFKXVLDLAPFFAK--LP--EKE         | 1704 |
| OYSTER          | HFPEVFETLSMLT---EK-KT-----TLSVKCKILELAPFFAT--LP--EPH       | 1693 |
| SNAIL           | HFTTVFTSCTILA---EK-KT-----NLAFAKXVLDLAPFFAA--VP--DAK       | 1701 |
| SPONGE          | VSKPLVDMTAMIG---DE-KL-----ELNFKAVMIDLPSFLLSS---PEH         | 1713 |
| PRIAPULA        | AHRDVIDTCLLV---DA-GT-----SLAFKTRVMELEHFFYCE--LP--EQE       | 1712 |
| DANTO           | AFNAVFTTALLT---DV-SM-----PLNLKSOALILPFFTA--LP--SMP         | 1717 |
| ESHARK          | AFAMVFTITLIT---DS-TL-----ALNLKSOAILPFFAH--LP--EEN          | 1713 |
| BHARK           | AFAMVFTITLIT---DS-TL-----ALNLKTKAVILPFFTO--LP--EEN         | 1712 |
| XENOPUS         | AFAEVFTTISILT---DQ-KL-----GLNLKSOAILPFFTK--LT--GEK         | 1728 |
| STERLET         | AFAVFSTITLVT---DS-TL-----PLNLKSOAILPFFTN--LL--GST          | 1729 |
| GAR             | AFNAVFTTALLT---DS-AL-----PLNLKXNHLILPFFTN--LP--EST         | 1717 |
| HUMAN           | SFPEVFTTISLLA---DT-KL-----DLHLKGOAVILPFFTS--LT--GGS        | 1706 |
| PLATYPUS        | AFSAVFNAISLLI---DK-KL-----GLNLKGOAVILPFFTN--LT--GDR        | 1710 |
| TASDEVIL        | AFLDVFTTISLLD---DP-KL-----GLNLKGOAILPFFTN--LT--GER         | 1713 |
| COELACANTH      | AFPAVFNTITLIT---DQ-TL-----ALNLKSOAVILPFFTN--LP--EDH        | 1717 |
| CAECILIAN       | AFSAVFNTISILT---DQ-KL-----GLNLKSOAILPFFTN--LT--GDS         | 1719 |
| CANARY          | AFTAVFNTISLLT---DQ-NL-----GLNLKGOAVILPFFTN--LT--GEK        | 1708 |
| OSTRICH         | AFTAVFNTISLLI---DQ-NL-----GLNLKSOAILPFFTN--LT--GEK         | 1678 |
| GECKO           | AFSDVFNTISLLT---DQ-NL-----GLNLKSOAVILPFFTN--LV--GER        | 1717 |
| TURTLE          | AFSAVFNTISLLI---DR-NL-----GLNLKGOAVILPFFTN--LT--GDR        | 1717 |
| ALLIGATOR       | AFPAVFNTISLLV---DQ-NL-----GLNLKSOAVILPFFTN--LT--GER        | 1675 |
| APLYSIA         | GVESVFEMLSMLT---DC-HT-----TLAFKXVLDLAPFFVT--LK--GEQ        | 1725 |
| TRICHOPLAX      | SFETVFNLSLLS---GT-ST-----SLAFKXVLDLAPFFLV--SS--DKR         | 1689 |
| SOFTCORAL       | -SRGMFKTNGLK---DK-TI-----TLTVKIQCLELPCFATSATIP--SEQ        | 1707 |
| STONYCORAL      | TFPSLFEMLYLYK---DK-ST-----TLAFKXVLDLAPFFYK--ST--EYF        | 1727 |
| SEA ANEMONE     | AFQIVLKMITSVFD---DK-NL-----TLTFKXRAVELPFFYK--LP--DNY       | 1699 |
| SEACUCIE        | AFQFTTISMLT---DP-ST-----NLTFKXQALELIPFFVQ--VP--DSE         | 1702 |
| LANCELET        | AFQVFTMLDMLT---DS-RS-----TLFPKXVLDLAPFFTV--LP--QTQ         | 1732 |
| STARFISH        | VFSSVLEAFSMLT---DA-ST-----SLTFKXQVMDLIPFFTS--LP--DGE       | 1738 |
| SEA URCHIN      | TFRPVFNQLSMLR---DS-KK-----SLAWKXQVLDLIPFFAN--VP--EKE       | 1727 |

Supplementary Figure 6 CLUSTAL OMEGA ALL PHYLA, EXPANDED

|                 |                                                              |      |
|-----------------|--------------------------------------------------------------|------|
| PARAMECIUM      | -----TDLPNYLNDYANKYPPKISDL-K---KGSABEELNFKTIILKKLTEMIKL-     | 1634 |
| TETRAHYMENA     | --NNADFF-VKGRDRDKVNSRSKYFPMKVKEL-K---RDSKQEIFDKSLGCMNMIKL-   | 1718 |
| STYLONCYTHIA    | --RENEFVHDKDNINFSRLTQSQFFPKITREL-V---RNSNVYNNFHIIVBGFSLLLIL- | 1709 |
| APHANOMYCESa    | FG-----PPLVDVAVGHLVVHGFVHSTDV-A---RGLSDFESFELLFHTYLSMLVQ-    | 1596 |
| APHANOMYCESb    | CT-----EIMTEGIAHLVVHDFPVNSNDI-T---KGTVAFDAFEMLFQSYLVLVK-     | 1554 |
| PYTHIUM         | GI-----KQIAEVLAAVVFDEFFISSADV-H---RGRTRDEYVQQLMDKLLVVEE-     | 1688 |
| PLASMOPARA      | PS-----DPLNALIAVVFDEFFIVSDV-S---RGRSRDFVHMLFTEVLHVVEQ-       | 1679 |
| BREMLIA         | VL-----KMTLDALVEFVFDEFFIVSTDV-I---RDSKDFNTFHMLFLELLGVIER-    | 1665 |
| AEDDES          | -K-----ASVAEALQKIQNHFFLRSSEF-I---ANSAERVSFENCLTALLDAMVV-     | 1741 |
| MIDGE           | -L-----NEKLMNDLNSMOMNPLRSREF-P---EGSLARVGLVRFTEELFQALLT-     | 1701 |
| BOMBUS          | -K-----PEVLVILRLKNNRDLVCPNDF-S---QRNVKALKITNCFHKLVMLLPV-     | 1623 |
| ANT             | -D-----LQ--MNLQILKINRSLCS-DL-S---EFSVAMKVTDCFETLLVLSST-      | 1646 |
| WHIPWORM        | -K-----ENLESELKLFVNNFPLKSSEF-A---SEAAKPEQYIICACRCPDAPAS-     | 1695 |
| TRICHIANELLA    | -A-----CELGRSLKLFMNNFPLKSDEF-A---KGTAKYDQHVACQKILPAPGC-      | 1703 |
| BEEBLE          | -N-----TDLRRLSDCFKAKLISSETSPIP-AEERPF-----ILDKLSSLIP--       | 1618 |
| BARNACLE        | -S-----ANICSLERLERHFFLESSEL-A---AGSPALATYRAVLASLCEALEM-      | 1626 |
| THRIP           | -P-----SDVKNLSLLKQNHFFVQCSSEF-R---PGSEELATFKRAFEALLQSLVI-    | 1638 |
| FLA             | -N-----PELTQALKTFQSLHFFLESKEF-R---EGSITERASYMFAFALLNSLCK-    | 1639 |
| WHITEFLY        | -T-----Y--DNVIEPAIHAYTAALETHI-LGESSFDKNYILVKTSLNKLGLAGLE-    | 1676 |
| TICK            | -G-----LKLRODALEEMVAQHFPLDSSTL-L---PGAEPLYCVSAMRKMVAGLER-    | 1664 |
| TERMITE         | -N-----QELRSALQTLREQHFPQLSTEL-H---SGSVGYSGFVNAFRKILRGLLE-    | 1709 |
| DAPHNIA         | -----KTLFASLQQFFTHNFFSKSTEL-E---KSDSK-SAYFSIFNRMIGLI---      | 1570 |
| OSTREOCOCCUS    | VLRAQKDALEKSLGDSLKNMVMQ---ERCDAP-----TFQRRFPSTINAFKQAFAM-    | 1705 |
| STENTOR         | -----A---AQYLPSTQN-L---QPSKEMTDFEIMSRFFELFMR-                | 1499 |
| KLEBSORMIDIUM   | -R-----RRVLDSVRRIVAEHLLIQSRDL-P---QGSPOFNRYVRIKSRALVA-       | 1830 |
| CLUBMOSS        | -R-----TRLIGSLTSLVTSHELLVREADI-P---DGSMEERTDYLKTDLLIGAVS-    | 1654 |
| MOSS            | -H-----SKLIRILSGIVTDYLLVREADI-P---QGSIQRSNYTQLLNQLLAASV-     | 1751 |
| LIVERWORT       | -Q-----SRLCRSLTKVSDNLLVREADI-P---KGSIQRAMYTRMLSRLLAVSL-      | 1776 |
| LIGNANO         | -RA-----ERLSSQLKLCSETVLMRCSNQLG---INSHAYCQYVRAFRGLLQAQET-    | 1804 |
| COPEPOD         | -G-----NDIKDALLSFSLLHFPATSTEL-V---PNSAAYNLYMSVFRQLLRTLES-    | 1645 |
| GLOBOSUM        | KF-----QKLEESLSSIVVEKFFLVSELT-E---DSNEQMDNYVCMNKLLEAMARC-    | 1616 |
| PALUSTRIS       | NA-----AKLERRLDIVVQFPISPDKL-V---EGTAQYSDYVDMANSLMKALEL-      | 1668 |
| NEOCALLIMASTIX  | YK-----DQLEKSEIEFLIYNQFPISNDI-I---KETLQYIEYKNTVTAFIN--LLS-   | 1745 |
| GLOMUS          | K-----EKIESCIEFLYQQLPTDSKDYSK---FGTKKLINEYSLVDKMFAMVR-       | 1800 |
| LOBOSPOR        | RT-----VEFESVFNRAVLNLMFMSSTEY-E---RGSSKFKDYINALDLLKALVA-     | 1723 |
| SYNCEPHALASTRUM | HV-----DRTIALVKEFASWQLGRSRDL-R---VGSSEYNYIAMLDKIIEHMSV-      | 1702 |
| FUNCTIVORUM     | -R-----EGAKEMLLDMVYDFPVSKEL-P---VGSAAVYDYSIALDKILSSLEI-      | 1697 |
| HALBUM          | NY-----NLIQEKLENIIVYDFPLSSKDL-T---KGSPIYNEYITPTIERPLNTEI-    | 1846 |
| DUPURPURIUM     | NF-----SLIKEKLENIIVYDFPLSSKDL-T---VKSPYIYNEYVTCIERLLETLEI-   | 1845 |
| PVIOLACIUM      | DY-----SIIKEKLENIIVYDFPLSSKDL-T---QRSPYIYNEYVTIERPLETLEI-    | 1839 |
| AMPHIPOD        | -Q-----QKVVEALEFFSVHHMPLKSDEF-A---AGSARDRDVRRCLKQLLTAVEL-    | 1745 |
| SHRIMP          | -A-----KSVSEALEMLSLNHFFLHSTEF-S---EGGARDREYHQAICEILTALEL-    | 1727 |
| MUDCRAB         | -S-----KSIDSELMVSKHFPMSSEF-P---VGGSRDRDYHQAISEILTALEL-       | 1722 |
| TARDIGRADE      | -G-----AVAETAMHEMVCVNDFFLKAEL-P---KGSPLAFYLAQVGFVLAAVEE-     | 1763 |
| HYDRA           | -C-----ADFKVALEHVAVNDFFVNSDEL-Q---IRSLKYAEYTSCLQSPFLRVLVN-   | 1674 |
| SALPINGOBECA    | -R-----TECAASLNAPQASFPVRSREY-A---VDSQTHREYIAALDILDALVL-      | 1725 |
| SPIDER          | -S-----TNLRSHLEEMVNHFFLQSTEF-V---PGSSAYHTYISALKNMLSALEL-     | 1737 |
| LIMULUS         | -E-----VLRNALDELANTFFLQSTEF-V---VGLSRVNSYVTFVRKILTALEL-      | 1737 |
| SCORPION        | -----KVQNALDELANTFFLQSTEF-K---PGSSQYNDYHAFKLLTALEL-          | 1735 |
| ROTIFFER        | -----FKVNSLQPM-SQLPRLSQDL-A---KSDIYKYDILAVHKKLLVCELE-        | 1715 |
| CLIONA          | -S-----EIKETLTKFVSNHFFLRSSEF-V---AGSEKYNYSITAMRKLDCMEL-      | 1747 |
| OCTOPUS         | -N-----SRLRNLKXFLMDK-----S-Q---PGTLTYDYISLIDKLLPALKK-        | 1699 |
| CAPITELLA       | -N-----KQLESCLNQFVADCFMSSLEF-H---AGSQQYKQYITALDRLLAMEL-      | 1748 |
| LIMPET          | -I-----TKLKSLLDRFVADNFFIKSNEF-T---KGSPRQDYISAINKILLALEL-     | 1730 |
| SCALLOP         | -V-----TKLKTSLDRFVADNFFLKSSEF-P---KGSQYRDYITALDKILSGLEL-     | 1769 |
| LINGULA         | -T-----QQLKACLDRFVADHFFLRSSEY-A---VGSQPKQYEMALSKILLSALEL-    | 1750 |
| OYSTER          | -L-----KKLKRSLDRFVADHFFIKSTDL-P---ESSPHFKDYIAAIDRLLTSLEL-    | 1739 |
| SNAIL           | -L-----KDVLDGLVADNFFLRSSEL-T---KGTFRPVDFYISADIKLLSALEL-      | 1744 |
| SPONGE          | -Q-----SQLKGSILNRLVSLQFPLTSSSEL-P---AGGPLLINEYTNIEKLCNSLVA-  | 1759 |
| PRIAPULA        | -T-----TKLRENDRMVAADFFPLRSDDF-I---VGSPKYHYDVAAMSQLLDVMV-     | 1758 |
| DANTIO          | -L-----EELRRALESVATHFFMOSDEF-P---RGSQCNNYMDCKRFFLEALQL-      | 1763 |
| ESHARK          | -L-----AVLRHALDQFVAHFPMKSDEF-P---KTLKRYNNYVDCIKKFLDALEL-     | 1759 |
| BSHARK          | -L-----VTLKNALNHFIASHFPMKSDEF-P---KGLTRVNNYVDCIKKFLDALEL-    | 1758 |
| XENOPUS         | -L-----TELKNTLDQFVASHFPMKSDEF-P---KGLKPNYVDCIKKFLDALEL-      | 1774 |
| STERLET         | -L-----ADLHNALEVLVASHFPMOSDEF-P---KGLTRVNNYVDCIKKFLDALEL-    | 1775 |
| GAR             | -L-----AELQRALEMVASHFPISSDEF-P---KGLTRVNNYVDCIKKFLDALEL-     | 1763 |
| HUMAN           | -L-----EELRVLEQLVAHFPMOSREF-P---PGTFRPNYVDCMKKFLDALEL-       | 1752 |
| PLATYPUS        | -L-----NDLKNALQFVAFNFPMSDEF-P---KGLTRVNNYVDCIKKFLDALEL-      | 1756 |
| TASDEVIL        | -L-----EDLKLALEKLVASNFPMSTSEF-V---QGLTKYNNYVDCIKKFLDALEL-    | 1759 |
| COELACANTH      | -L-----ADLKNALDQFVAFNFPMSDEF-P---KGLTKYNNYVDCIKKFLDALEL-     | 1763 |
| CAECILIAN       | -L-----NDLKNALDQFVAFNFPMSDEF-P---KGLTKYNNYVDCIKKFLDALEL-     | 1765 |
| CANARY          | -L-----NDLKNALDQFVAFNFPMSDEF-P---KGLTKHNNYVDCIKKFLDALEL-     | 1754 |
| OSTRICH         | -L-----NDLKNALDQFVAFNFPMSDEF-P---KGLTKHNNYVDCIKKFLDALEL-     | 1724 |
| GECKO           | -L-----VDLKNVLDQFVAFNFPMSDEF-P---KGLTRVNNYVDCIKKFLDALEL-     | 1763 |
| TURTLE          | -I-----SELKNALDQFVAFNFPMSDEF-P---KGLTRVNNYVDCIKKFLDALEL-     | 1763 |
| ALLIGATOR       | -L-----KELKDALDQFVAFNFPMSDEF-P---KGLTRVNNYVDCIKKFLDALEL-     | 1721 |
| APLYSIA         | -S-----SKVIDGLNRFIADNFFLKGNEF-S---KGTGHNNYVDCIKKFLVAMEM-     | 1771 |
| TRICHOPLAX      | -I-----RELREHLDRMIVDKFPLKSAEF-V---VGSQYNDYVACIKKLLANLIK-     | 1735 |
| SOFTCORAL       | -T-----EALRSALKTLIADNFFLKSSEF-N---ENNPYSDYIAALDKILLSALVI-    | 1753 |
| STONYCORAL      | -L-----RRLKEGLNAFVNNIPLKSSEF-V---TGGPQYNDYVQITDKLLAAFVN-     | 1773 |
| SEA ANEMONE     | -Q-----SQLKSCIDTLVTDNFFLKSSEF-I---PGSPRYNDYIATLDKLLVMTV-     | 1745 |
| SEACUCU         | -S-----QKVREALDQFVVDNFFLKSSEF-G---VGSQYNDYIAALNKLLTAMVL-     | 1748 |
| LANCELET        | -L-----AELKARLDRMVAADNFFLKSSEF-P---AGSSQYNDYVAGVTKLLSALEL-   | 1778 |
| STARFISH        | -Q-----TKLRSALDRMVAADNFFLKSSEF-R---VGSQYNDYIAGALNKLLTAMVL-   | 1784 |
| SEA_URCHIN      | -E-----KELKSALDQFVAFNFPMSDEF-E---AGSPRYNDYIAMNKLLTSLVM-      | 1773 |

Supplementary Figure 6 CLUSTAL OMEGA ALL PHYLA, EXPANDED

|                |                                                            |      |
|----------------|------------------------------------------------------------|------|
| PARAMECIUM     | CG-----QIQYIEVLPFLLRQDL-NPD-----LFIQEFLQI-----             | 1664 |
| TETRAHYMENA    | AG-----QIRLELILFPVIRESL-EEPVHTKIIITPQQIKFNKEMTQ-----       | 1759 |
| STYLONCHIA     | SK-----NLKVLRLMIYNSMREWK-T-TYEPKLRKTLKIQESINKM-----        | 1749 |
| APHANOMYCESa   | SG-----HVGLLKTFRSLNEKN-QHVFSNDMYDMLTQCDDLDGPR-----         | 1637 |
| APHANOMYCESb   | SS-----QIVLLKTLFQSLKEKK-SHAFYSAIQDALESFALEVPMCR-----       | 1595 |
| PYTHIUM        | CR-----SVLELKVLYSSLKEGS-KHLFGKTIQSSGLRGLATNVTGS-----SGPRF  | 1733 |
| PLASMOPIRA     | SK-----SIAYLVKVIYPSLKEAE-SHLFRVEIKQMLARFCITLGSGLQIESTVHADN | 1730 |
| BREMIA         | SK-----SVAYLKIIYPSLKEAE-KHVFPYTEIKQMLARFCITLGSGLQIESTVHADN | 1716 |
| AEDDES         | SR-----SPVLLKAVIADTAADP-EHIAEHKIRIALEKYMSSQNSN-----        | 1781 |
| MIDGE          | SR-----SPAVYRFITINITISDD-AYIMESKLRQVQVNI MERLSST-----      | 1741 |
| BOMBUS         | TK-----SVIVPEFTLFAFGL-AKYLNETNETNEYLQKYFDSITPD-----        | 1663 |
| ANT            | TK-----SMLKCYTFEAGA-CNRLINKELEHRLQFYCASLE-----             | 1686 |
| WHIPWORM       | TG-----SLVINLLLAVVCCRE-QHPVSYLHSSPHYVQSVRFA-----           | 1735 |
| TRICHINELLA    | TG-----SPILLELLSMVCREQ-SHPIASDLKHQLQKFPSSRANSa-----        | 1743 |
| BEEFLE         | KL-----RCFLLVFLLEIYAKMSTGNSISDVKHMYMTEIMNNOQE-----         | 1659 |
| BARNACLE       | TA-----HPALARYMCLVLCRE-ARHPCSGLLAALTAAGRHGTA-----          | 1666 |
| THRIP          | TG-----SSSILNIVIRMTVDP-NHNCRHLLPSTLQKYMAVLOKSO-----        | 1679 |
| FLICA          | SQ-----SPILLERITISIAADL-DHICEDEIQEKLCAPIENCAPE-----        | 1679 |
| WHITEFLY       | TG-----NAFLKRIIMRTSIDLQ-NIRNDIKKTLANLTKKKNDI-----          | 1716 |
| TICK           | SG-----SLVLELLRVLRYREGSHFLAEVLAQRTLTRCGET-----             | 1705 |
| TERMITE        | SG-----SCVILLSVAMA-ASESQHVLEDIQKSLQIPIKRLEDK-----          | 1749 |
| DAPHNIA        | -C-----VPVVHFVLDVFALEP-NHPCLPEPFIQSVQNEWTESIG-----         | 1610 |
| OSTREOCOCCLUS  | CR-----SFRLISALVPFYDK-----WLEPCVKGAVTSW-----               | 1734 |
| STENTOR        | TP-----TLANLEL-LHLLIRER-KSLYBEKLNQITMVLKIVKVBAG-----       | 1739 |
| KEBSORMIDIUM   | SL-----SLGLEEFPVLQFOQC-NPLASRRLEHRLPAGETARKD-----          | 1871 |
| CLUBMOSS       | SR-----NLDALEVLPFLQNP-TGLTTPPLSEALRAYAQNIIG-DK-----        | 1693 |
| MOSS           | SH-----SLELELVIFPLVQTP-NKISSRAVSEAVEVFAESLE-DN-----        | 1790 |
| LIVERWORT      | SC-----SVTLELILFPLLLDP-PKFAVRTLFDLSLELSONIG-EE-----        | 1815 |
| LIGNANO        | SE-----HPLLLEILSILVCKER-QHALEAEFQOCLNRLLRIPQIR-----        | 1845 |
| COPEPOD        | TK-----SPTLLYFIIISACREP-CHVCEDDIQSTLSNLSRSSSDQ-----        | 1686 |
| GLOBOSUM       | SN-----SAMVERILMLHMCRRP-SHPFNESVMDCSIAKASSVSFEV-----       | 1657 |
| PALUSTRIS      | SD-----GVVIPKVLARHVCRE-SHMFVAVSLKAMGAIARRLSAAD-----        | 1709 |
| NEOCALLIMASTIX | TG-----NFIIKKNLLLTCKEE-NPKYQEKIKEFAIILINNYSEEQ-----        | 1786 |
| GLIOMUS        | SR-----SVSLFKILPTFCRES-DHMYGEEFQVQVSEFLSKLSRSK-----        | 1841 |
| LOBOSPOR       | SS-----SFSLFKTLMGIAIRES-NHPHMEQQHISSEFALRQPLSK-----        | 1764 |
| SYMPHYALASTRUM | FR-----STPLFNLLPLYIQEE-DHIHAEAFKGGFAKARTLDMKR-----         | 1743 |
| FUNGIIVORUM    | SI-----SDRQGLVTSMPLEALPALSE-M-NHSIFQSMVSITEKATSCOSS-----   | 1735 |
| HALBUM         | TC-----NPMIDTLLQVLKE-Q-DHSHIQTINQSIERTIVRTNDSQ-----        | 1886 |
| DURIPUREUM     | TK-----NPIIIDILLHVLKE-T-DHSHVHYINLSIERTILLTNDSE-----       | 1885 |
| PVOLIACEUM     | TK-----NPFMIDVLLHVLKE-T-DHSHIQINLSIQKILISTNDQO-----        | 1879 |
| AMPHIPOD       | TA-----RPVLLHLAKIFCHES-NHRYKDLLESMSKVMAGVGTAE-----         | 1786 |
| SHRIMP         | SL-----SPILLQFVVNLFCRE-DHRYEEVMEHESLEKFMKLLPLK-----        | 1768 |
| MUDCRAB        | SL-----SLELLKFLQVFCNED-KHRYEEAFNESIEKFKRQQVSK-----         | 1763 |
| TARDIGRADE     | CR-----SIGGTEICIKLVCRA-DHPLLEERCGRMFEAVVANDHSEN-----       | 1804 |
| HYDRA          | SS-----SPLLEVLVSVFVRE-KSVYKRVLPALQPAKILKVN-----            | 1715 |
| SALPINGOBECA   | SG-----SLELEVVVTVHQREDRTHVHEDHQRKLRDPVQEHDTA-----          | 1767 |
| SPIDER         | TG-----CGFLFEILTSPFCCKE-EHVLEVNFQCITDMLSKSSSH-----         | 1778 |
| LIMULUS        | CG-----SLTLTFVVMGIMCREA-CHLLEEEFQRIISRSVCRKLPKE-----       | 1778 |
| SCORPION       | TC-----NBMLLKQVIMCREB-THLLEHQCKLKLCKRTDSSK-----            | 1776 |
| ROTIFFER       | SQ-----NLDMSLIGVVCREK-EHLCENQFRCLEAKKLSSEK-----            | 1756 |
| CIONA          | SG-----SLELLNWNLYCRDQ-SHVMSDEIMSSLEKCVASIPVSK-----         | 1788 |
| OCTOPUS        | SK-----SKMLLELVIEYQCEE-KHCHEKDHNCLTEFKRRSLD-----           | 1740 |
| CAPITELLA      | SG-----SLMLLNLIISVICKEV-KHTEHAIQSAFORIKRILPKDK-----        | 1789 |
| LIMPET         | SG-----CSMLLELLISIFCRES-KHVEDEIDQVIRARYTKRLVIYK-----       | 1771 |
| SCALLOP        | SG-----SLVLELLISITCREQ-KHTYEDTIQQFLNRFTRRLPADK-----        | 1810 |
| LINGULA        | SG-----SLMLLELLISIMCREK-NHVYEDRMQESLVTFIRRLPTGH-----       | 1791 |
| OYSTER         | SG-----SEMMLLELLISIFCREP-KHVYETKILESINRFRTRVPAK-----       | 1780 |
| SNAIL          | SS-----SLVLELLISIFCREEGRHVEDAIQOQLNTFTARLPAEK-----         | 1786 |
| SPONGE         | SG-----SLVLELLISINMCREV-RHVCEKIQTSLHQIFSKLSEGD-----        | 1800 |
| PRIAPULA       | SG-----STMLLRLVTSIVCRE-SKAMHDQLQTSLSRPIHRLSADK-----        | 1799 |
| DANTIO         | SQ-----SPLLKLMARVLCRDK-KHIMEELFQACFKIAHQSYLKG-----         | 1804 |
| ESHARK         | SQ-----SPMLKMLMALLCRDS-RHVMEEGFQVCFQRLAKGSCCK-----         | 1800 |
| BSHARK         | SQ-----SPMLLQIIEVLCRDN-RHVMEEAFOICPONAKRGTCCK-----         | 1799 |
| XENOPUS        | SQ-----SPMLLQIMEIILCRDE-RHFMEELFQSSFKVIRKSSCDT-----        | 1815 |
| STERLET        | SQ-----SPMLLKLMEIILCRDN-KHVMEELFQCFKRIARRGSCCK-----        | 1816 |
| GAR            | SQ-----NPMMLKLMEIILCRDK-KHVTEELFQACFKRIARRGSCER-----       | 1804 |
| HUMAN          | SQ-----SPMLLELMIEVLCREQ-QHVMEELFQSSFRRIARRGSCVT-----       | 1793 |
| PLATYPUS       | SQ-----SPMLLQIMEIILCRDQ-RHFMEELFQMSFKRIARRSGSAK-----       | 1797 |
| TASDEVIL       | SQ-----SPMLLQIMEIILCRDQ-RHVEIEELFTQTFQRISKSSSAT-----       | 1800 |
| COELACANTH     | SQ-----SPMLLRMLMEIILCRDS-KHCEELFLRCFKVIRRGSCDR-----        | 1804 |
| CAECILIAN      | SQ-----STMLLKLMEIILCRDT-KHFMEELFQSSFKRIARRGNCK-----        | 1806 |
| CANARY         | SQ-----SPMLLQIMEIILCRDN-RHFMEDLFQASFKRISRRSPDK-----        | 1795 |
| OSTRICH        | SQ-----SPMLLQIMEVLCRDH-RHFMGLFQASFKRISRRSNSDR-----         | 1765 |
| GECKO          | SQ-----SPMLLQIMEIILCRDH-RHMEGLFQFESIRIARRGSCYK-----        | 1804 |
| TURTLE         | SQ-----SPMLLQIMEIILCRDH-RHMEGLFQFSFKRISRRSSEK-----         | 1804 |
| ALLIGATOR      | SQ-----SPMLLQIMEIILCRDH-RHCMEDLPQFSFKRIVKRSDCNK-----       | 1762 |
| APLYSIA        | TG-----SAQLLETVISVFCREK-RHPHEDIQAGIARVQRLTPDG-----         | 1812 |
| TRICHOPLAX     | SG-----NLMLLEVLISVMCREK-KHAYEIQKSLLLLFISSLIPKD-----        | 1776 |
| SOFTCORAL      | SG-----SLMLFDLLISIVCREE-SHSHHEEIQFQAKFKRKLKLOQ-----        | 1794 |
| STONYCORAL     | SR-----SLILLLEVLIAIFCREK-QHVHEDTIQQSFIQIARLHPPE-----       | 1814 |
| SEA ANEMONIE   | SG-----SLVLLQVIAVLCCREE-RHVHEEIQKSLAAFIQRLAPSS-----        | 1786 |
| SEACUCLE       | SG-----SMNLELIVIGLCREE-KHYEAEIKRSLSEIRRMDSK-----           | 1789 |
| LANCELET       | SS-----SLMLLELLISVMCREA-KHYMEDDIQTSLSRPIKMGADK-----        | 1819 |
| STARFISH       | SG-----NLMLLELIVISIMCREK-KHAYEIQESLAAFIKRPLEEK-----        | 1825 |
| SEA URCHIN     | SG-----SLMLLELISILCRDD-KHSYEDKIQALSSFAKRLPSEK-----         | 1814 |

Supplementary Figure 6 CLUSTAL OMEGA ALL PHYLA, EXPANDED

```

PARAMECIUM --NQESYQQLKQWMLQIKDEQLDSTLNNAVIALGNKLLIPL--LSNS-----NLL 1711
TETRAHYMENA TVNKQLYFMWALDQYKDKDLDRSLLECIRVEIIQKVLHLH--LENA----K----EBAN 1809
STYLONCHEIA PLHQFKOTFSQFQDEFMNRQIDLSVDDNLKWAIMKKTILKLI--LESC--S-----QEFL 1799
APHANOMYCEsa IPSVCLVELPLV-----FS---PSLTDHIRTLLRQVFPVL--MTRL--D-----EAAI 1679
APHANOMYCEsa IYPICVLLELQLL-----FD---FGLDDYIRTVLRQVFSRL--VHQL---E-----EAAI 1637
PYTHIUM AHDYMMLELLEVL-----LD---PVGDLTVRMMLENLFPVPL--AELQ---K-----ADNL 1775
PLASMOPARA IQRQMAELLDLL-----LD---PNVDVAIRKILILEVFTFPL--VECQ---T-----GEIL 1772
BREMIJA MRLLQLAELLEVL-----LD---STLDVSRVRLLEEVFTPL--LECQ---T-----GEVM 1758
AEDESA ---QOCFNLIKQIFTK--FRE--ESLEPNIRLTLKRYLVTSL--LRVC--N-----VETI 1824
MIDGE ---EQEVIMMOTFDE--FST--NKCEPEIRLKFSRFLITL--MKNS---H-----NVMV 1784
BOMBUS ---YAVKSLQAAKIKLFHM--L-----TNERFDVLQRFLPLPS--FEFC---D-----TTBI 1703
ANT ---HVLESQITVDAFME--T-----NTSPTERLILRFLPA--EKFC--N-----ALAI 1730
WHIPWORM ---SVNAADKLYSTFDLDA--SCPTEDYKSSVFPFLPL--LOCM---D-----SAAL 1780
TRICHINELLA ---VLENILELLEKDMFPNPS--GCVCASLRALLNEFFIPL--LSL---K-----NDLL 1788
BEEFLE ---HKLILLV--KLYDLCLLED---LDNFQKYKLI--IDTSSV--FOYC---N-----VTSF 1700
BARNACLE ---QQLALAEELAL--FWPA--GGLPAAGRRLLVSLCPL--LRAA---D-----RPVL 1710
THRIP ---DHQVESLKVFSM--FEN--ETISVEYRAKILINELKLI--MFA---S-----LSSQ 1723
FLEA ---NQFNLRIPYFQ--IKS--REYTPSIRVSLKRVLGTI--LTSC---D-----QQII 1722
WHITELY TICK ---IKKDLNVMPFC--AVG--LPELENYRENILKYLVEPT--LRYCCIKSG---KNVL 1763
TERMITE ---KQQQLTEAALLTNQSTN--QGLLISARLKSASKLPLL--LKSC---S-----KPAL 1750
DAFPHNIA ---QVKAIEAVFKV--FVD--DOYDPVSRGLCAQRFVRLP--LOGC---R-----RSAA 1792
OSTREOCOCCLUS ---TSLDKVNRIYVHAKT-----RSINWKTREFAIETLYTSL--LKAL---P-----S-- 1651
STENTOR ---NGALQSSILWLIVAD-----VYADFRQLSAAASLILPFL--LEAA--N-----AQEI 1776
KLEBSORMIDIUM ---YETTFQLTEMLVDQPNMDEKGLIDMRWGAKRILPLM--IDYA---D-----ELMI 595
CLUBMOSS ---FKPLETELTLHD-----GKQPRLLKAWDMVWPA--EYAA---D-----ESFI 1913
MOSS ---RVAARSYCDMVLKD-----ATKLPRLKAVLDYFVPL--ICLS---P-----VDPL 1735
LIVERWORT ---REAAFNLCITMIMD---RGKSYELRRAVVEVIFEAP--VNSS---S-----MEFV 1832
LIGNANO ---RTACNLNLCQLLGD-----STKLPOLRRAVIRDRVVSLL--MNA--S-----PLFV 1857
COPEPOD ---CRDFWTPWRFLFRGDSGGGTFGPHRQLVSRVLA--LITC---H-----GSVL 1891
GLOBOSUM ---QFELITVPYTFIDDS--GLFSAQVRLSIVRFAVPS--VOTS---L-----PATI 1730
PALUSTRIS ---FDELEKYGFEFSVQ--S---KNSHDLRWNAKLLLVT--LQSC---Q-----LDNL 1699
NEOCALLIMASTIX ---IDMLSTLGLFFPD--S---SLPMEVRGNVHMLVLA--LSVA---P-----KAVV 1751
GLOMUS ---FNEFTDYCMEVLLN--N---KALPLVKNVIRQYLIPA--LIHV---N-----CQFK 1828
LOBOSPOR ---YVDTMDIAYGYFTN--S---T--YVSFRRIIEMILSPP--LQO---P-----KIFV 1882
SYNCEPHALASTRUM ---VLEITGYCFDEFIK--R---THSDEHRRRIHQILLPM--LKAL---P-----TFSV 1806
FUNGIIVORUM ---PHLETEFCLAYKQD--D---GNRLEVRRNVI--SLLVSL--FVLV---P-----DDV 1784
HALBUM ---ACQLFASCSHFIM--E---SLQQLRHLHDOLFCPL--EKRI---D-----HLSLNGESHV 1782
DUPURPUREUM ---AKEIFSHCFELFLN--H---NDELKITLIDKFCVPL--LSHM---K-----EETL 1928
PVIOLACEUM ---AKDLRSHCFQLS--Q---DYQDELKITLIDKFCVPL--LHHM---K-----ETVL 1921
AMPHIPOD ---QFSLASRVQVVEAQE--ASGLQLHRQLNERNVLSL--LRTA---D-----VVS 1830
SHRIMP ---QOETLKHIDMYNDPT--CIKQ--NLRYNIMDLVLTPL--LQA---E-----AVPT 1811
MUDCRAB ---QIDTFRVYDMYANQS--HLKQ--NLRYNIMEKVLTL--LQLS---D-----LTVT 1806
TARDIGRADE ---VQKIFEPKWFITP--P---QYQPDHRRATAVEILLPM--LOAA---T-----STAR 1846
HYDRA ---VDIVLDSLVMKFNDE--E--SKYADDIRAVIIDRVCIPL--LINEV--S-----WISL 1758
SALPINGOEA ---PQALELMPQIYLA--E--T--NPLFVRRGVAQRVLATP--LOAC---K-----LSMC 1808
SPIDER ---HQLYADIVFSLIMKSG--FDSKSDVLLKIVNKLVLV--MONI---S-----LTSF 1822
LIMULUS ---QVNSMDTLFGMFLCED--Q--LPAEMKLGITIEKVCVPI--LRL---S-----KPM 1821
SCORPION ---ERLLEAVPLKMFLEDE--L--VPSDMRHHLEKVFVPL--LQMI---S-----KITL 1819
ROTIFFER ---QMEIYKQWSNFSQS-----SDDERKFLIEKVIPL--LKNC--D-----KPFV 1796
CIONA ---QCPALEIPYTFITP--S---TQRSIPAAQTALHNHVNPM--AACC---D-----NVSV 1830
OCTOPUS ---QKSYQVPPDFLFLK--T--QSCVNNPKKFKVKKVCLPP--LRNM---S-----KIPF 1783
CAPITELLA ---HKLALDVPYKIFSQ--E--GRFTNNQRRAACEKVSLSL--LRLV---H-----SSAL 1832
LIMPET ---QKLALDIPYKIFTYS--S--GSYPSAIRIAALSRLVPLM--LRLV---H-----KSAV 1814
SCALLOP ---QKLADVAVGVFSK--E---SYPAEIRIATLHKVALPM--LHLC---H-----KSAL 1852
LINGULA ---QKALDVPFNIFTK--E--GLFPEIRRSRLSRVCVPL--LRLC---H-----QSSL 1834
OYSTER ---QKSMVDVYVYFCQ--E--KLYPGEVRRRTIIEKVALPI--LRLV---H-----KSAL 1823
SNAIL ---QKDALDVPYKIVFC--E--SGFQDMIRRTTLERVCLPI--LRCV---H-----KAAL 1829
SPONGE ---VDALKFVYEMFRN--D--KDFPVAAVKGGIGERLCPVL--FTEC---S-----SAVL 1842
PRIAPULA ---QKLAADSGYSILAE--E--GNPFGETRRSCLDMVVLVLL--LRQC---C-----HHA 1842
DANTO ---QVLLSSTQSFFQA--K--EVPSPNFMLMGLDRVLTPL--ASHC---S-----PQAL 1847
ESHARK ---QVALLEAVGVMEFN--E--AGLSNLRASQVDRSLLTL--THLC---S-----LDAL 1843
BSHARK ---QVALLEAAVEMFRN--E--EMLDNATQFAMDRLTLL--LGHC---S-----PDAL 1842
XENOPUS ---QVILLNPTLHNMFKS--E--SLMLNGTQLSLDRCLLTL--LWNC---S-----LDAM 1858
STERLET ---QVSLDTPVYQMFQN--D--ELHSNTARQAVLDRSLLTL--TLHC---S-----SDAL 1859
GAR ---QVVLLETVYEMFQA--G--ELASGAMRQAVLDRVLTPL--VLHC---S-----SDAL 1847
HUMAN ---QVGLLESVYEMFRK--D--DPRLSFTQSFVDRSLLTL--LWHC---S-----LDAL 1836
PLATYPUS ---QVALLEAVHGMFLR--D--DHLSSSTRQAFVDRSLLTL--LLHC---S-----LDAL 1840
TASDEVIL ---QVALDTPVHRMFQK--D--D--LNSIPLRACVDRSLLTL--LWHC---S-----LAAL 1842
COELACANTH ---QVTLDDTVYKMFQD--E--GLLSNTRQAIMDRFLLTL--MLNC---S-----IDAL 1847
CAECILIAN ---QVALLETVMDFMFKT--E--NLWSNTRQOTIVDKSLLTL--LWHC---S-----LDAL 1849
CANARY ---QVLLDTPVHKMFQS--E--ELLSNAARQAFVDRSLLTL--LWHC---S-----LDAL 1838
OSTRICH ---QVLLDTPVHKMFQS--E--DLRSNVTRQAFVDRSLLTL--LLHC---S-----LDAL 1808
GECKO ---QVLLDTPVHKMFQS--E--TLSSATRQAFVDRSLLTL--LLHC---S-----TDAL 1847
TURTLE ---QVLLDTPVHKMFQS--E--ALLSNARQAFVDRSLLTL--LLHC---S-----LDAL 1847
ALLIGATOR ---QVLLDTPVYKMFQS--E--SLLSNVTRQAFVDRSLLTL--LWNC---S-----LDAL 1805
APLYSIA ---LATALNVVYVAFSK--E--QSYFHEIRWAVERLCPM--LHLS---P-----RVTV 1855
TRICHOPLAX ---ALGALDVPFKMFDV--D--KSYRPNIRRAAIEKVCVPLM--LOKA---S-----LKIT 1819
SOFTCORAL ---ARKALDICFDVFTKKD--TEYRNLTRRAAIDKVLVL--LRAS---S-----TSVF 1838
STONYCORAL ---DQAKAAMDVCLSIFFN--E--RDYQTHSRRAVERICITIT--LLKT---S-----TTAR 1859
SEA ANEMONE ---SLVKGADVTVYRIFTN--E--RDHTSNVRKAVLDRVSVTL--LCNA---S-----KAGV 1831
SEACUCU ---QVSALGTCLKIFQA--E--GEYFTQMRRAVMEKVCVPLM--FRLC---Q-----VDSV 1832
LANCELET ---QKPALEDIPYGIFFR--E--GSFPNEIRRALERVCLPM--LRLV---H-----PAAL 1862
STARFISH ---QTAAGVAVYQIFCQ--D--NSFSKEIRRAAIEKVCVPLM--MRLA---G-----VKAL 1868
SEA URCHIN ---QSAANIPPEIFQK--D--KRYSKEIRRAAIEKVCVPLM--LRQA---S-----RDAT 1857

```

Supplementary Figure 6 CLUSTAL OMEGA ALL PHYLA, EXPANDED

|                 |                                                            |      |
|-----------------|------------------------------------------------------------|------|
| PARAMECIUM      | LEFYSEPTPY-----LIQ-QL-NV-TWDDN-WKN--MLFQLQW---RGLIFDLPGIA  | 1754 |
| TETRAHYMENA     | VKFMVKNSPY-----LKK-LF-YN-TDFMK-QEN--MKEVLRWQELQVFNIPESL    | 1855 |
| STYLONCYTHIA    | ADLMEPTPQ-----LII-VL-KE-SIFLQ-KDP--LE-QYQLKQKRWIFLVPEVM    | 1844 |
| APHANOMYCESa    | VAVVSTTSFG--APVVQYLMT-VV-----TS----DTSPLAVVVVTGLLELL       | 1678 |
| APHANOMYCESa    | IKLFTMTSFG--VPFVKYLMN-IV-----LN----DQSPILSLVMAFGSLELL      | 1720 |
| PYTHIUM         | REFYMLLEDKTSKVTMISKLAT-VV-----SNSSDVAQOGASTAAVAYTLVELL     | 1823 |
| PLASMOPARA      | LHFYMMENEKRRKSTIISLLAT-LI-----SASABGAFESRIGTVVAFSLVEIL     | 1820 |
| BREMIA          | LQFYLMEIPKRLSVISVLTAT-LI-----SASADVQSRGCGIGVVVAYSLVDIL     | 1806 |
| AEDDES          | YTFYKLYIRN-----IND-MI-R-SNYG--QFGSGWEAEHAVNRLGGYQLIELY     | 1869 |
| MIDGE           | KSPFIRQKML-----IWS-LI-E-A-----PLNVDMENGFVNRKAGYMIIEAF      | 1824 |
| BOMBUS          | NKFFETNIEK-----IYT-VI-C-QSLV--GG--TSDIKQIVSKIGCYDLVAIM     | 1746 |
| ANT             | ERFVKKILL-----LKK-MM-T-KNID--CN--DAAIKOIVSKIGCFQIAIM       | 1773 |
| WHIPWORM        | GHEACSHVSS-----IYS-TL-S-ETDL--NPI-HQLYEKQIVPKQGYNICSLL     | 1824 |
| TRICHIANELLA    | ITLCKRKIQT-----LVS-CL-T-ESLT--LEI-QTDCEQOILPKIGCYKICAI     | 1832 |
| BEEBLE          | EDFTEPITST-----VLT-VL-K-EP-----VTTENLKNKILHFLLVGLV         | 1737 |
| BARNACLE        | LQFYTSHVVA-----IAR-PV-QDEPPA--VPADSEPTHEQVSRMSGFSLLEVL     | 1757 |
| THRIP           | VSVSVSTISK-----LVK-RI-T-EGFS--MKTVDGKQKHKLMSHIGSQWLLQHI    | 1768 |
| FLA             | ELFYKNFFEE-----VFNLI-E-SPYT--SASRAWDLQKAVDRTCFHLITIL       | 1768 |
| WHITEFLY        | KVFEQCIEN-----LMT-TV-N-AEFT--LSAKENEINTEVSKIVALTLLEIL      | 1808 |
| TICK            | HRFFVDNVT-----MVD-AV-A-AKIR-----HGSESELSKIVALSCLEVL        | 1790 |
| TERMITE         | REFYRHCIQD-----LIG-ML-N-VTLD--CRG-QLQTEHQLVGRIGAWNILEPL    | 1836 |
| DAPHNIA         | --SFERHVNE-----LIG-DITQ--ICEE--ARGGVEAFVHKIVVICALFEVA      | 1692 |
| OSTREOCOCCUS    | VEFMEHNET-----IMK-DI-T--GG-----ANGLLCTLRSLANVLLSV          | 1810 |
| STENFOR         | EKMLYCTQO-----MLG-KITE--IKPT--EYDSKBLFRERKRWILLIEPFP       | 1631 |
| KLEBSORMIDIUM   | SEWADKFE-----LKR-TL-G-KEYSY-RTRTDAETFOELTTRTALSLIEM        | 1960 |
| CLUBMOSS        | TGNFTPRVTE-----LMD-SL-G-RTVM--SPDMTEQOELLAKIYSYTLLELL      | 1779 |
| MOSS            | TVWYQHSID-----LFY-VL-K-QSSS--MLSAEREFEDLKKICHYELLELL       | 1876 |
| LIVERWORT       | ADWYSKRIK-----IVD-AL-G-KPVN--SIDAETEEELVWVKVCHSLELL        | 1901 |
| LIGNANO         | LDVATDDCLE-YC-----LIC-LL-N-AQOSLAGFN--ESETEEILLARGCCRVLSCF | 1940 |
| COPEPOD         | RRFFSEMES-----LLL-NV-G-VEVL--GS--EKRASVLSKIGTFQLFGLV       | 1773 |
| GLOBOSUM        | VRFFVQYIRE-----IMD-NL-A-AAAPT-GD--ESALLQYLVTKAICFMLEVA     | 1743 |
| PALUSTRIS       | RAAFVRHIQ-----IMT-TL-S-RPLST-K---EHDQESQLLTKTACFELMDCV     | 1794 |
| NEOCALLIMASTIX  | IKFYSKHIS-----LTK-VI-K-EQLIN-K---EDELICQLNIHSSIFNLIQIM     | 1871 |
| GLOMUS          | MDFFKKHINE-----IID-LL-E-RDKYT-RNV--DEKII-YNERAGSLTLQLL     | 1926 |
| LOBOSPOR        | SEFYVLIAR-----IM--GV-I-KQETP-RST--DTEMRRDYIERECCYGLVHV     | 1850 |
| SYNCEPHALASTRUM | VDFYLDNILF-----IMT-GA-T-RQLLR-RGT--DEEIRVDMEKTCCTYLMQTF    | 1829 |
| FUNGIIVORUM     | QGLAERIST-----IIG-TL-N-HTIN--FSODEEFTKTMFK---KISYIA        | 1822 |
| HALBUM          | IQLAQHASS-----LMS-II-Q-PLAP--KYLATAIERKSSVVEKICCFKLPQOF    | 1974 |
| DPURPUREUM      | VOIFSHHANS-----LMS-II-Q-PLQP--KYLSDSQERKSSIIKICCFHLIEAL    | 1971 |
| PVIOLACEUM      | VQLCQNLTS-----FMS-II-Q-PLTP--KYLSDSQERKSSIIKICCFRLVEAL     | 1967 |
| AMPHIPOD        | ERFFERHLKS-----IMN-LL-S-CSLP--SRP--EQ-LCVLTKGLAALRLQLL     | 1873 |
| SHRIMP          | QNFLLTVISA-----VMA-GM-S-APVH--GRS--DEQ-HKLVTKVGSFMILQIM    | 1854 |
| MUDCRAB         | VSFIDVIKP-----VMA-GM-S-LTIQ--GRS--DEQ-QRLVTKIGSFKILQVI     | 1849 |
| TARDIGRADE      | MDFFSRMTKD-----MIT-IL-D-TKER--STT-----AGLLIVQTCFSLLELL     | 1886 |
| HYDRA           | KQFFQRNIV-----FTS-HI-D-EKFN--KLL--QSKLASQLINKICSFNVLSLM    | 1802 |
| SALPINGOBECA    | SAFYIKRLPA-----IMS-IM-S-QDTP--LTS-----TPAVIKMCTPFLIDIL     | 1848 |
| SPIDER          | INFFLSHIRE-----IMK-TV-K-ENLS--LA--SGVKDIIHVKKICCFKLELM     | 1865 |
| LIMULUS         | TDFFVKMIRS-----IME-TV-S-SKVI--RGS--EERIKAOILLIKIGAFQLEVL   | 1865 |
| SCORPION        | KYFFLDHKE-----IMQ-IV-K-SKAK--SS-----NEIQVSKIGAFQLEILL      | 1859 |
| ROTIFFER        | IDFMSANIVS-----LIE-VL-N-W--NLN--EPFEMMLANKVFPQLELA         | 1837 |
| CIONA           | IQFFQTNISH-----IMS-VV-Q-EEHI--KYP--ESKSYQLQMKCLAYRLELM     | 1874 |
| OCTOPIUS        | VEFLKSNIPA-----IVN-IV-E-AEMS--QLP--D-LMBQHLTDMKCCFQILEVM   | 1826 |
| CAPITELLA       | TEFYCEHIKE-----IMK-II-E-AKPT--KAP--EHAFAEQITKIGCFLEVM      | 1876 |
| LIMPET          | IEFFLTHISF-----IMS-EI-E-AKLV--RGS--KAELENOITTKIGCFQMLELL   | 1858 |
| SCALLOP         | IEFFLDHME-----LRS-IL-E-AKQV--KGP--GLENQVSKTGCFLIDIM        | 1894 |
| LINGULA         | SEFYVDHIF-----ITD-TL-S-AKLS--KSS--ESEIERLLTKLCCFELVEVM     | 1875 |
| OYSTER          | LEFFTDHMGD-----LRT-TV-E-AKLV--RGS--GLENQVSKLCCFQLELM       | 1865 |
| SNAIL           | IEFFLDHILD-----LMR-IV-E-QNLA--RGP--ESILKQVLSKVVCCFQLEVM    | 1873 |
| SPONGE          | LEFFVLKISD-----VMC-IM-E-AKLA--RVT--DPKLEQVLVHKSCEFQIEIL    | 1886 |
| PRIAPULA        | VEFFRCHLVE-----IIG-II-E-AKVV--KLP--ERQYESQLISKICSLKLELM    | 1886 |
| DANTIO          | SQFFISNAD-----IMT-TL-Q-TRFT--KSV--ESVFESQIMMKIGCCKLEVL     | 1891 |
| ESHARK          | KEFISKIID-----AMG-TL-Q-SRPT--KTS--ESSFDQITKIGCYKLEVL       | 1887 |
| BESHARK         | REFPCKIVKD-----AME-IL-Q-SRPT--KTN--ESSFDQITKIGCYKLEVM      | 1886 |
| XENOPUS         | ISFFTNIIISL-----AMD-TL-K-SRPT--KVP--EAAPDSQITKKGYYKMLEVQ   | 1902 |
| STERLET         | KEFFCTVGD-----IMG-TL-Q-ARPT--KSS--ESTFETQITKKNKCYKLEVL     | 1903 |
| GAR             | RGFFCKTIAS-----VME-TL-Q-ARFT--KLN--EAMFEGOLIKKNKCYKLEVL    | 1891 |
| HUMAN           | REFFTIVVD-----AID-VL-K-SRFT--KLN--ESTFDQITKKNKGYKILDMV     | 1880 |
| PLATYPUS        | KEFFYRIIVG-----AMD-ML-K-SRFT--KSN--ESTFDQITKKNKGYKLEMM     | 1884 |
| TASDEVIL        | REFPSSIVE-----ALD-VL-K-SRFT--KLS--ESTFDQITKKNKGYKLEVL      | 1886 |
| COELACANTH      | KEFLCKNILD-----VMG-TL-Q-ARFT--KSN--ESAFDQITKTKGICYKLEVM    | 1891 |
| CAECILIAN       | KEFFCKIIH-----TMD-TL-K-GRFT--KSN--ELAFDAQIMMKMSYKMLEVM     | 1893 |
| CANARY          | RVFFGKIIIVE-----AMD-TL-N-SRFT--KSH--EHTFDQITKKNKGYKLEVM    | 1882 |
| OSTRICH         | REFFGTIIVQ-----AMD-TL-N-SRFT--KSN--ESTFDQITKKNKGYKLEVM     | 1852 |
| GECKO           | DDFFCKIIVE-----AMD-SL-T-SRFT--KSN--ETMFDQITKKNKGYKLEVM     | 1891 |
| TURTLE          | KDFPCKIVLE-----AMD-TL-K-SRFT--KSN--ESAFDQITKKNKGYKLEVM     | 1891 |
| ALLIGATOR       | KEFFSKIVVE-----AMD-TL-K-SRPT--KSN--ETVPNQITKKNKGYKLEVL     | 1849 |
| APLYSIA         | IEFFSSHIE-----LIN-NI-D-CKLN--KSS--ESVFAHQITKSGSQLEVM       | 1899 |
| TRICHOPLAX      | KDFYVSHIKE-----IMD-II-E-TKLV--KTA--DLENOLISKIGSKYKMLKIM    | 1861 |
| SOFTCORAL       | REFFYVDHIK-----IME-II-E-TRFS--KAT--DSVFESQVSKLCCFQLELALL   | 1882 |
| STONYCORAL      | RAFYQDQIQ-----LMS-VL-E-AKEL--KPT--DPNFESQVSKLCCFQLELIL     | 1903 |
| SEA ANEMONE     | SEFFSSHVKE-----IME-II-E-AKQL--KTY--DPGFESQVSKMCAFRMIEVL    | 1875 |
| SEACUCIE        | IEVFORNIRD-----FVD-IL-E-NKLL--KIS--EAVFAHQVSKICCFELIELL    | 1876 |
| LANCELET        | TEFFTDHIRE-----IMD-II-G-APQT--KAG--EASLRTQITNKLCCFQLELTM   | 1906 |
| STARFISH        | SSFFKECIRN-----IGS-II-D-AKTI--KAP--ETVFNQITVSKTCCFQLELVM   | 1912 |
| SEA_URCHIN      | VTFFYKGIHD-----IIS-VL-E-ARLT--KNP--VPAPENQVSKICYFELIEVL    | 1901 |

Supplementary Figure 6 CLUSTAL OMEGA ALL PHYLA, EXPANDED

|                 |                                                                    |      |
|-----------------|--------------------------------------------------------------------|------|
| PARAMECIUM      | KRMSTPQIK---KQLHQH---LKF-----QADNFI--TKKLLVD--NKASKF--             | 1793 |
| TETRAHYMENA     | KALSLDKLX---DDVHKK---LYPDT-----TQGNRI--TKSLIKLI--FEYRKK--          | 1896 |
| STYLNONCHIA     | RRRLKPELIR---QQVHKK---LYGES-----SPGNEL--TKSLIQLC--LAKAKA--         | 1885 |
| APHANOMYCESa    | TCLSGDAVR---RLVNPV---YAATA-----GAKGNEL--TMRLCKTQ--SOKSAS--         | 1762 |
| APHANOMYCESb    | YCLSGDAIR---HSVNPV---YAD-A-----PAKGNEL--TMRLCKAM--SOKSAN--         | 1719 |
| PHYTIUM         | RLVDPESIR---GEINRA---FLGHD-----NGKREEL--TMLVCKCK--SKFITK--         | 1865 |
| PLASMOPARA      | RLVDPDIR---SKINSA---FLGHK-----SGKREEL--TMLVCKCK--SKVVTK--          | 1862 |
| BREMIA          | RLVDGELIR---TDINAA---FLGHT-----NGKREEL--TMLVCKCK--SKLVTK--         | 1848 |
| AEDDES          | VAIQRYDYL--TDDCIVAKA---LYG--ESG-----KIPGNRI--ITDLTKRY--YAARSEV--   | 1916 |
| MIDGE           | AATVPCSITE-K-----ESF-----TYG--GKL-----EVKREEL--IKDFIKRQ--MEVTRVI-- | 1866 |
| BOMBUS          | AKLIQWDD--NBSVITRN---AID---N-----VVTKREL--LHSLYSML--MLVR---        | 1788 |
| ANT             | ARVBNKID--AN--GTIAQN---ELD---Q-----LLDQNH--VRELFNML--MQQSP--       | 1816 |
| WHIPWORM        | DLLSLDQLK---GPVNEA---FCH---GK-----SVDKREL--IKKMVSLV--SVASRQL--     | 1867 |
| TRICHIANELLA    | NELDLECLK---NEVNVV---YLG--SD-----SQMKREL--IKKLVSCV--VGAKEP--       | 1875 |
| BEEBLE          | LRLCPLOQD--SEISRIQTQA---ALP--Q-K-----PNKREL--LQLLKFPLN---AI--      | 1779 |
| BARNACLE        | ASLPKDQTH--AATSPLVTA---FA--GAT-----ARGNEL--TKALLGSV--AAAFKTP--     | 1802 |
| THRIP           | GFPMKSLLE--EKGSSELVQA---AFSGSETK---VTSKREL--YTLIVKTK--LAAAFQN--    | 1816 |
| FLEA            | YLSDPSEIF--DASNPIILRS---F---PDFK---QENPREV--LSTLTRKQ--FKARTF--     | 1813 |
| WHITEFLY        | GYLDRSDFD--TEWF-----KTASKV---SSQDEF--LQKLLKVV--VEPKNC--            | 1848 |
| TICK            | SCCPKDDVT--GRQSSVNAA---FCRSRGIV---DVVQREL--TKEITKHN---NSAK--       | 1836 |
| TERMITE         | VHLESSELE--SKECVITAA---AF--PGAV---KTKREL--ISDLSRNV--YKYSRTEL--     | 1883 |
| DAPHNIA         | IVRVYQNTL---GHLNANFCALRCGQQ---PSENGREL--LKYIMQLV--LNIRKATA--       | 1741 |
| OSTREOCOCCUS    | QKCKDQQL--LDGPRSKVPKL---N-----ALVRSKI--MFLSGLGQ--VAGKAAQ--         | 1852 |
| STENTOR         | AKLPSNRLE--EN---VHKA---LYGPG-----SQGNEL--TKQITVTV--SKYRKE--        | 1674 |
| KLEBSORMIDIUM   | LRLSAEQLR--EKCGVPKQK-----FVH---TRVYH---LQVYIRG--                   | 1993 |
| CLUBMOSS        | TOVDKERIT---F-S-----YQNL---MKF--SNDTRG--                           | 1805 |
| MOSS            | SKADNVSI--KTIAPVF-T-----FSDI---MRO--GDTCHG--                       | 1908 |
| LIVERWORT       | LKVDAPLIK--EKITPSA-S-----NAIL---MKV--MESRA--                       | 1933 |
| LIGNANO         | MACGLTELA--LPR---LCDAFKRFYSRQP---A-AQKDPDRSI--SNWVSVQV--DVLVTQ--   | 1990 |
| COPEPOD         | SRLDQSTLH--KECGIIVEQAKAVFKKHSLLP---PQKDKDL--AIYLLPYL--GDSRQKLS--   | 1828 |
| GLOBOSUM        | KRLPPSELH--SAKGRILQA---YVGPS-----KSGEREL--TIALIKS--VDFKKK--        | 1788 |
| PALAUSTRIS      | SRLDTHDVH--STAGNIVKA---YCNQT-----PKTKREL--SVDLKLK--NTSKNE--        | 1839 |
| NEOCALLIMASTIX  | EYLPNTEVN--GANSPINKA---PCDGN---VKNGREL--LTNLMKPV--YAIARSVT--       | 1918 |
| GLOMUS          | LRASEEDVY--SEKGEIVKA---YQSR-----PLKREL--TRKVMERK--HKIKSRAD--       | 1973 |
| LOBOSPOR        | MRLPSEMVN--TKDSKIVDA---FT---G-----HKTTREL--TVDVFRV--NAAFKQD--      | 1897 |
| SYNCEPHALASTRUM | LVRVHGGIP--GRSEVSKK---WEQETGMMPDKADAKKIM--MTKLVDSL--DQAKSE--       | 1881 |
| FUNGIIVORUM     | RILDPQPIR---EIMMR---FSGE-----AAKREL--TASVMBL--SINKCD--             | 1863 |
| HALBUM          | ESLPAVTVR---DQVNPY---PTGDK---HDAKREL--TAAIMKA--HSAKSE--            | 2017 |
| DUPURPUREUM     | QSLSTNLIK---EKINPY---PY-DK-----PDSKREL--TAAIMKA--HSAKSE--          | 2013 |
| PVIOLACEUM      | QSLSSTLIK---DTVNPY---PY-DK-----PDAKREL--TAAIMKA--HSAKSE--          | 2009 |
| AMPHIPOD        | AKLSRQDQF--SSASAVNAV---VNPAD-----ASKREL--TKELLKRV--LRLAKG--        | 1917 |
| SHRIMP          | SKLPREKLF--APGSEINAA---FRPGD-----QSKREL--TKEIFRY--AKISKG--         | 1898 |
| MUDCRAB         | SRLPRELIF--NPGSEINAA---YQPSD-----TSKREL--TKDVLRS--SKVAKG--         | 1893 |
| TARDIGRADE      | CVTLSQGDLE--SPTSKVLLA---FCAIRDQPA---VTKREL--IQFVTRC--NEFAHK--      | 1934 |
| HYDRA           | ELLGKEELT--SATSTIVQT---PCPNV-----STKREL--TVFLSKS--SQSYKE--         | 1846 |
| SALPINGOBECA    | QRLNNTDLY--GKSAVINKT---YCEAAGEPV---NDKQSHL---TTN--CRALRD--         | 1893 |
| SPIDER          | STLNKDLH--SKESEIVET---YLGRK---P---EVENEL--STDITKL--LEFKKF--        | 1910 |
| LIMULUS         | SCLPKELIS--SKESLINKA---FCDGN---V-----DTKREL--TTTELTRG--SHATKQD--   | 1910 |
| SCORPION        | TYLSKEEVS--KESQ-I-----N--C-----SHKREL--TREAQTE--LAAARKE--          | 1896 |
| ROTLIFER        | KRLKHEEFT--FTMAKICMA---YFTKFCQV---KQKREL--TKEVLRG--RKHME--         | 1885 |
| CIONA           | ALLPEDQL--KPPSPVNHV---PTSSQ-----LQSSREL--IKTFMLR--NRDRNE--         | 1919 |
| OCTOPUS         | RSMQVKELE--GPGSEINSV---YCKARNIEA--QMIVKEM--TKVITRI--HOTKKE--       | 1876 |
| CAPITELLA       | SRLPNTDYN--SKDSINKS---FCSPK--IP---DTKEM--NLITIKV--NATKGE--         | 1922 |
| LIMPET          | SRLTKDEVN--SKNSVINEK---YQCTK---V---ETKEM--TQKATKC--HEARSE--        | 1903 |
| SCALLOP         | SHLAKENVS--SKNSVINEK---FCQIKNEPI---KTCSEM--TRVIMKI--HAAKGE--       | 1942 |
| LINGULA         | SSFPKEEVN--SKNSKINKL---YCGGK---V---ETKEM--TTAVTKA--HEAKKE--        | 1923 |
| OYSTER          | GRLSKEEVF--GRSSVINCK---FCEVKSINV---DTKEM--TQVIMRT--HEAKGE--        | 1913 |
| SNAIL           | SRLSREEVN--SLSSEINKK---VCPGK---P---ETKEM--TQKIKAK--NNAKSE--        | 1918 |
| SPONGE          | TRLPSSLIS--SMESTVNTA---YCNVS---P---QTKREL--TQAITK--CHGAKSE--       | 1931 |
| PRIAPULA        | ACLPKEDVY--GRDAALQV---FLASR---P---AGKREL--TPVITRL--CYDACRE--       | 1931 |
| DANTO           | SRLPKDEVY--SKNSAINQA---FCGTG---C---ABNREL--SKNLLKS--FEAFTE--       | 1936 |
| ESHARK          | IRLPPDDY--SKDSINKA---FHSS--N---MBSREL--SKSLK--CYDAFTE--            | 1933 |
| BHARK           | TRLPKNDY--TDGSKIIQA---PHSAG---N---IBNREL--SKTLKKS--YDVTTE--        | 1931 |
| XENOPUS         | SRLSKDEIV--ST---VNNA---YHVSS---K---PEBREL--TKALIKL--YDFTTE--       | 1944 |
| STERLET         | SRLPKEDVY--SKESLINAQ---FCRPN---K---ABNREL--SKNLLKS--FDFTTE--       | 1948 |
| GAR             | SRLPKDEVY--SKESKINQV---FCGPS---R---AABREL--SKTLKKS--FEAYTE--       | 1937 |
| HUMAN           | SRLPKDDVH--AKESKINQV---FHGSC---I---TEGREL--TKTLIKL--CYDAFTE--      | 1925 |
| PLATYPUS        | SRLPKDDVH--SKESRINRA---FHGSS---V---IBNREL--TKTLIKS--CYDAFTE--      | 1929 |
| TASDEVIL        | SRLPKDDVH--SKESRINQV---FHGSS---I---VEGREL--TKTLIKL--CYDAFTE--      | 1931 |
| COELACANTH      | CSRLPKDDY--SEQSRINQA---FHGSC---S---AQRREL--SKTLKLL--CYDEFTE--      | 1936 |
| CAECILIAN       | SRLTKEDYI--SKGSRINQA---FHGSS---N---ABNREL--TKLIVKS--CYDSFSE--      | 1938 |
| CANARY          | VRLSKEEVY--SKDSINKA---YRGSN---S---VEGREL--TKTLIKS--CYDAFTE--       | 1927 |
| OSTRICH         | VRLSKEEVY--SKDSINKA---YCGSI---S---VBNREL--TKTLIKS--CYDAFTE--       | 1897 |
| GECKO           | SRLSKEEVY--SKDSINKA---FLRST---C---VEGREL--TKTLIKS--CYDAFTE--       | 1936 |
| TURTLE          | SRLSKEEVY--SKDSINKA---YQGST---N---VEBREL--TKTLIKS--CYDAFTE--       | 1936 |
| ALLIGATOR       | SRLSKEEVY--SKDSINKA---YQGTI---N---VEBREL--TKMLIKS--CYDAFTE--       | 1894 |
| APLYSIA         | SSLSKDDVN--SKTSAVNLR---FCHGK---V---DTKEM--TQRTKAK--QEAKE--         | 1944 |
| TRICHOPLAX      | SKLSKQDYN--TAESSIVKA---YTRGP---T---EDKREL--TKSITKA--HACKSD--       | 1906 |
| SOFTCORAL       | ARLEKTVS--SMESRINKA---YNN-D---V---KTKREL--TMAITKA--HAAKSE--        | 1926 |
| STONYCORAL      | SQFSKSELN--TLESTINKA---YVGGD---V---KTKREL--TLAITKA--RAASIE--       | 1948 |
| SEA ANEMONE     | SRLGKAELN--SPQSSINLA---YCP-N---D---NTKREL--TKAITKS--HAAKSE--       | 1919 |
| SEACUKE         | TRLGKDQLN--STTSVINSV---YCMGD---C---KTKEM--TQGITKA--HFAKSE--        | 1921 |
| LANCELET        | SRLPKDEVN--TPPSRIVRA---YKGEV---V---KAGREL--TTAITKF--HAAKSE--       | 1951 |
| STARFISH        | SRLVKEDLF--SMDSAINKA---YTN-D---V---KTKEM--TQALTKA--HAAKSE--        | 1956 |
| SEA_URCHIN      | SRLSKDDLN--SKDSALNRE---YRHGN---V---EKREL--STALTKA--ALGARNE--       | 1946 |

Supplementary Figure 6 CLUSTAL OMEGA ALL PHYLA, EXPANDED

|                 |                                                        |      |
|-----------------|--------------------------------------------------------|------|
| PARAMECIUM      | KFEK--INILNI--NQKEILLSOVNYLKIIVEDYQSSAFITFIYIVLMK----- | 1836 |
| TETRAHYMENA     | GFER--ADDIKNNVQNPDLIGDSHSILRLFSIAVNICLSLITPK-----      | 1941 |
| STYLNONCHIA     | PIDG--FVNFVKDSIKSEFPQYNSPLQVQRYAAATICTDILIMG-----      | 1930 |
| APHANOMYCEsA    | -----ADRPVAIAARCLISIVRT-----                           | 1782 |
| APHANOMYCESe    | -----PENSCAVAAARCLIVVVRK-----                          | 1739 |
| PYTHIUM         | -----THDGLGETTRFSCSAANCLIAVSR-----                     | 1892 |
| PLASMOPARA      | -----IYLEADDLVRLACAAANCLIAAISQ-----                    | 1889 |
| BREMIA          | -----EYSNVDELNRMACAAARCLISAVSR-----                    | 1875 |
| AEDDES          | --F-----LTPDSPTAELFRKYCAARCLIAANISN-----               | 1946 |
| MIDGE           | --TF-----IVDDPKROELFRQFHCYCRMASIVSN-----               | 1897 |
| BOMBUS          | --ML-----RTHEPELKETTRLLHSAANCLIAIVSN-----              | 1819 |
| ANT             | --LK-----ITRIFGCQKLVRLLSAAANCLIAISL-----               | 1846 |
| WHIPWORM        | --LG-----A---DTWRVRSWQLRGAANCLIVAVLKK-----             | 1895 |
| TRICHIANELLA    | --CR-----DSKLDISQKHFFEYRGAANCLIVHLVKK-----             | 1906 |
| BEEFLE          | KDT-----IDCVVEYEELFRLYKASNCLIAISIVCNS-----             | 1811 |
| BARNACLE        | PLR-----CMEPASLSEARRRCMAANCLIAAVSAL-----               | 1834 |
| THRIP           | PLN-----FEGISDAKELYRQYLCAIYNYLIAVFCNKTKQ-----          | 1851 |
| FLEA            | MNY-----DENDTESAELFRQYCTAIKIKLCHLCSL-----              | 1845 |
| WHITEFLY        | --TS-----NFKSADYEDALRRYHCASFTATMLCINAKRDVPSSESKDS----- | 1892 |
| TICK            | KEV-----VRRDVEFAGLWRQLRGAARCLIVAVVSC-----              | 1868 |
| TERMITE         | HDN-----LTGNVQLVELFRQSCAAARCLIAVLIISNV-----            | 1915 |
| DAPHNIA         | PFN-----EENELEIYQDMEFESRLVLSIASV-----                  | 1769 |
| OSTREOCOCCUS    | -----CGQENI--ALRVYH--MPLFPCSLIAK-----                  | 1877 |
| STENTOR         | RPEK-----YELDISASDDYLRQFCASRCLIACTIRK-----             | 1708 |
| KLEBSORMIIDIUM  | KERL-----K--VMGTAABQSPESAQRGICGAANCLIAIKSL-----        | 2032 |
| CLUBMOSS        | KNDP-----R-----VYFPQENVSFWRDLHSAANCLIAAVVMCC-----      | 1839 |
| MOSS            | KLDP-----E-----YKLYPENLSTWRDLHSAANCLIAAVILCC-----      | 1942 |
| LIVERWORT       | KNDP-----V-----TCLHFENCTLWRDLHSAANCLIAAVITLR-----      | 1967 |
| LIGNANO         | -----SFPRCRESARQMOCAANCLIAVHCIAK-----                  | 2017 |
| COPEPOD         | GLE-----ISSEVLRPLYRKYHCAANCLIACTIISCC-----             | 1859 |
| GLOBOSUM        | P-A-----FEERSIASYRLIWNATAPAVAVCLLAL-----               | 1818 |
| PALUSSTRIS      | NFR-----EPPGVASFRTTYHGAANCLIAVAVIAL-----               | 1870 |
| NEOCALLIMASTIX  | NIN-----SNNEDYLKANKYYKSSYCLIAAMLYC-----                | 1949 |
| GLOMUS          | KDD-----NGNKLYSEANLHFRCAANCLIAAVILCC-----              | 2004 |
| LOBOSPOR        | STP-----MT--PETAALREDYRGAANCLIASAILCC-----             | 1927 |
| SYNCEPHALASTRUM | QNP-----QAEVLVETRLRYHGAANCLIAVAILN-----                | 1912 |
| FUNGIIVORUM     | PHLVHSLRPPRDDASNEDKTYLFRNRCFYHGAANCLIAVSR-----         | 1910 |
| HALBUM          | KLAT-----DQHVTRVLTATKYHGAANCLIASVAVAT-----             | 2049 |
| DPURPUREUM      | KLTS-----DDRVTYVTRSLCTMYHGAANCLIASVILAA-----           | 2045 |
| PVIOLACEUM      | KLTS-----DDKFVTRQCLTYHSAANCLIASVILCC-----              | 2041 |
| AMPHIPOD        | ELR-----HDTTHAELRRLCASAAANCLIAAILIN-----               | 1947 |
| SHRIMP          | ELR-----HDQTHAELRRLCASAAANCLIAIVLAC-----               | 1928 |
| MUDCRAB         | ELR-----HDQTHAELRRLCASAAANCLIAIVLVC-----               | 1923 |
| TARDIGRADE      | NVA-----SEPGMEVRRLFHGAANCLIAAVATA-----                 | 1964 |
| HYDRA           | SYN-----ENNMELOKRYHGAANCLIASIISCC-----                 | 1874 |
| SALPINGOECA     | TVT-----GEESLVELRRQASGAANCLIAVITVICK-----              | 1923 |
| SPIDER          | SYE-----TEPEYKVLRLKLANCAANCLIAVIVVSC-----              | 1940 |
| LIMULUS         | DLR-----GETTLYDIRRRLSAAANCLIAVIVVSC-----               | 1940 |
| SCORPION        | NLE-----GESISKFCRYHGAANCLIAVITVICK-----                | 1926 |
| ROTIFFER        | YVNFVNTQGE-----SAKLEANKOLERLHSAANCLIASITLR-----        | 1923 |
| CLIONA          | NMK-----GEKVLLEERRQFHGAANCLIAVIVVSC-----               | 1949 |
| OCTOPUS         | DVH-----GETLPLELRRQVHGAANCLIAVIVVSC-----               | 1906 |
| CAPITELLA       | NMN-----GETLLIPLRRALHGAANCLIAVIVVSC-----               | 1952 |
| LIMPET          | DTR-----GETELVELRRQYHGAANCLIAVIVVSC-----               | 1933 |
| SCALLOP         | DTR-----GETTLLSLRRLHGAANCLIAVIVVSC-----                | 1972 |
| LINGULA         | DVR-----GEKRLPELRRQYHGAANCLIAVIVVSC-----               | 1953 |
| OYSTER          | DVR-----GETSCVELRRQYHGAANCLIAVIVVSC-----               | 1943 |
| SNAIL           | DTR-----GDFMVELRRQYHGAANCLIAVIVVSC-----                | 1948 |
| SPONGE          | DLH-----GDRTHYETRRQYHGAANCLIAVIVVSC-----               | 1961 |
| PRIAPULA        | DMR-----GERALLELRRQYHGAANCLIAVIVVSC-----               | 1961 |
| DANTO           | NMT-----GEMVLELRRQFHGAANCLIAVIVVSC-----                | 1966 |
| ESHARK          | NMT-----GESQLEKRRQYHGAANCLIAVIVVSC-----                | 1963 |
| BHARK           | NMT-----GETOLLEKRRQYHGAANCLIAVIVVSC-----               | 1961 |
| XENOPUS         | NMC-----GETOLLEKRRQYHGAANCLIAVIVVSC-----               | 1974 |
| STERLET         | NMA-----GETOLLEKRRQYHGAANCLIAVIVVSC-----               | 1978 |
| GAR             | NMA-----GETOLLEKRRQYHGAANCLIAVIVVSC-----               | 1967 |
| HUMAN           | NMA-----GENQLEKRRQYHGAANCLIAVIVVSC-----                | 1955 |
| PLATYPUS        | NMA-----GETOLLEKRRQYHGAANCLIAVIVVSC-----               | 1959 |
| TASDEVIL        | NMA-----GETOLLEKRRQYHGAANCLIAVIVVSC-----               | 1961 |
| COELACANTH      | NMA-----GETOLLEKRRQYHGAANCLIAVIVVSC-----               | 1966 |
| CAECILIAN       | NMA-----GETOLFEKRRQYHGAANCLIAVIVVSC-----               | 1968 |
| CANARY          | NMA-----GESQLEKRRQYHGAANCLIAVIVVSC-----                | 1957 |
| OSTRICH         | NMA-----GESQLEKRRQYHGAANCLIAVIVVSC-----                | 1927 |
| GECKO           | NMT-----GETOLLEKRRQYHGAANCLIAVIVVSC-----               | 1966 |
| TURTLE          | NMA-----GESQLEKRRQYHGAANCLIAVIVVSC-----                | 1966 |
| ALLIGATOR       | NMA-----GESHLLGKRRQYHGAANCLIAVIVVSC-----               | 1924 |
| APLYSIA         | DCR-----GESLVELRRQYHGAANCLIAVIVVSC-----                | 1974 |
| TRICHOPLAX      | DLR-----GETRSVELHRQCCGAANCLIAVIVVSC-----               | 1936 |
| SOFTCORAL       | NMQ-----GETVLLPLRREYHGAANCLIAVIVVSC-----               | 1956 |
| STONYCORAL      | DMR-----GETVALELRRQFHGAANCLIAVIVVSC-----               | 1978 |
| SEA_ANEMONE     | DMR-----GETVAFELRRQLHGAANCLIAVIVVSC-----               | 1949 |
| SEACUKE         | NVG-----GEKVCIDLRQYHGAANCLIAVIVVSC-----                | 1951 |
| LANCELET        | DLR-----GETGLDLRREFHGAANCLIAVIVVSC-----                | 1981 |
| STARFISH        | DIR-----GETNALELRRQFHGAANCLIAVIVVSC-----               | 1986 |
| SEA_URCHIN      | DCR-----GETVALELRRQFHGAANCLIAVIVVSC-----               | 1976 |

Supplementary Figure 6 CLUSTAL OMEGA ALL PHYLA, EXPANDED

|                 |                                                         |      |
|-----------------|---------------------------------------------------------|------|
| PARAMECIUM      | -----TKK--ENIYAHLLKPKER---DISYDQVPIIK-----EWFQF--NFOV-  | 1871 |
| TETRAHYMENA     | -----NK--ENILNQFLPQOK---NDHLQDLIDG-----TQKE--NFEI-      | 1976 |
| STYLNCHIA       | -----TK--ENLISQLFLATLRDKGEECPNVLIDQ-----EKA--NFEV-      | 1968 |
| APHANOMYCESa    | -----TQ--EKFTQLLADADA-----LWPHIMAKTEDEGGDEY---SDET-     | 1819 |
| APHANOMYCESa    | -----TQ--EKFTQLLADQ-----LWPKIVDQ-----SQDY--IFET-        | 1770 |
| PYTHIUM         | -----KQ--EKFDQILFQEA-----LWKNIIDG-----ARE--SLKA-        | 1923 |
| PLASMOPARA      | -----KQ--EKLVDQILFQSA-----LWSNLVDS-----ALEY--ELRA-      | 1920 |
| BREMIA          | -----KQ--EKLVDQILFQPA-----LWSNLVDP-----ARQY--ELAA-      | 1906 |
| AEDES           | -----KED--LQLNVLLFRENADK-NEYIWRKLVIC-----TECHLYDSF--SQ- | 1986 |
| MIDGE           | -----KDN--PLIYNLALFKES-SK-TGYIWRNPIDT-----KNEDLYGNFTQ-  | 1936 |
| BOMBUS          | -----KRD--EDNIA-SHLENRKK-EQLIWEHVIC-----QKQ--NFOQ-      | 1855 |
| ANT             | -----KKE--EYEM-FAVGNMKR-GLVILKRVIC-----DTQ--ELDQ-       | 1882 |
| WHIPWORM        | -----TQ--LKHVEGVVSE-----CFDHTIS-----ELK--EAGEW          | 1926 |
| TRICHINELLA     | -----SH--LKHVEGVVIND-----CHSHIIBK-----EVK--EDRE         | 1937 |
| BEEBLE          | -----MKD--ANFTKLFVRQEDN--KDILKSLIDT-----KKT--VFOA-      | 1847 |
| BARNACLE        | -----TTE--ARFTQTLAEAPER-NQLIWERLVDA-----ERRV--HLPVE     | 1872 |
| THRIP           | -----VAD--LKFVK-VLFAENT---RKFVRLVDD-----DKCY--MLPF-     | 1884 |
| FLEA            | -----KSD--LKFVTGLFRENPLK-KEIWRNIIIC-----KRIY--EFPQ-     | 1882 |
| WHITEFLY        | PSTSSVAKKRSa--LDFVTKFVSKLGTG-G--FMDKIILN-----KQNV--RHVD | 1938 |
| TICK            | -----TTE--SQFDVVFVQERPEK-GEFLWNLVDE-----KAVY--TTP-      | 1905 |
| TERMITE         | -----KCE--LRFTGLLFSENK-A-KEVPKGLVIC-----NKPE--ALAL-     | 1951 |
| DAPHNIA         | -----PTLD--EESMDKLIIRPM-NQ-KFALANAMVIT-----TKR--NLVA-   | 1806 |
| OSTREOCOCCLUS   | -----TTH--VFKLKLKES-----TKSRLVIVR-----TKR--ELEA-        | 1908 |
| STENTOR         | -----SQ--EKVFNLELRDQ-----NKKLIEE-----KED--GKFD-         | 1739 |
| KLEBSORIDIUM    | -----GCP--NFBFLKESG--AK-EGFLKRVIC-----DKVY--DHEDV-      | 2068 |
| CLUBMOSS        | -----KQD--EKIENLLKFD---A-GNPLQHLVDC-----SKVY--SSPV-     | 1873 |
| MOSS            | -----LID--EKWNAFLSE---K-SRPLQHLVDC-----TKVY--DDMSV-     | 1977 |
| LIVERWORT       | -----EQ--EKVGLLFKEG---S-TGMIOHVLVDT-----IKVY--NEIPV-    | 2002 |
| LIGNANO         | -----DK--ERLNL-PPPTENAAK-RKFDNIIVPT-----DVDY--QLPL-     | 2053 |
| COPEPOD         | -----NFN--VNAVDTLIFRENKKK-NQFVSEIIDI-----SQPI--HLGL-    | 1896 |
| GLOBOSUM        | -----NISKVVEIINSVLFVEK---PCLWENIIVD-----SRPI--ELET-     | 1853 |
| PALUSTRIS       | -----RDQLVKKCTTLFLENKQK-QEDPKNVIDI-----HEDL--RDK-       | 1908 |
| NEOCALLIMASTIX  | -----TKK--ENFNVVLFQENDAK-NEKIWEHVIT-----HHKI--FKV-      | 1986 |
| GLOMUS          | -----NN--PVFKALFLAENTSK-GELLWENIIDL-----EIHV--KIKI-     | 2041 |
| LOBOSPOR        | -----KPK--EDFVRQLFRDNEAK-KEFVWEHVIL-----EAKK--HFEO-     | 1964 |
| SYNCEPHALASTRUM | -----TKK--EALNGQLLKA---R-KAGHWEIIDL-----KKK--ESPURT-    | 1948 |
| FUNCTIVORUM     | -----TKK--ENFSVVFRENKDK-GEBD-----KEDV--KLEV-            | 1937 |
| HALBUM          | -----TKK--EFTHVVFKENKDK-NEYLWEHVIL-----EQOY--NEEP-      | 2086 |
| DPURPUREUM      | -----TKK--ENFLHVVFKENKDK-NEYLWEHVIC-----DQOY--NES-      | 2082 |
| PVIOLACEUM      | -----TKK--ENFLHVVFKENKDK-NEYLWEHVIT-----ELE--KEP-       | 2078 |
| AMPHIPOD        | -----DD--LKFVNNFLVQNTAK-GEALWAMIDV-----NQLK--EFEE-      | 1984 |
| SHRIMP          | -----ND--LRFTNLFLSANPTK-GEVWECLVDC-----SRNL--EDV-       | 1965 |
| MUDCRAB         | -----KDD--LKFVTSFLNANPTK-GEALWECLIDC-----NRNL--QFDI-    | 1960 |
| TARDIGRADE      | -----PIA--LKFVHLCLFEQNAEK-GKILWMLVLD-----KROV--TEV-     | 2001 |
| HYDRA           | -----NE--MKFVAGLFLAENLLK-GSFVLENVLD-----KKEV--NKKS-     | 1911 |
| SALPINGOEA      | -----TQ--EKFNAPCFKEATGK-VRDVFHLIDE-----KRVY--TTT-       | 1960 |
| SPIDER          | -----NE--LKFVNAFLKENPAK-NEYIWRKRVIDE-----DIKL--TSM-     | 1977 |
| LIMULUS         | -----SD--PKFTVFLFQENSAK-REFVWEHVIL-----RKE--YFPV-       | 1977 |
| SCORPION        | -----TD--SKFSTFLFQENPAK-GEVWEHVIL-----NKE--TPT-         | 1963 |
| ROTIFFER        | -----TTE--PKLILALFKDDPSK-NFVFEPLIK-----IKS--MFCV-       | 1960 |
| CIONA           | -----SS--IKWVFLDENPSK-QQYFIANVLD-----NKNV--TNDT-        | 1986 |
| OCTOPUS         | -----TD--LKNVFLFAENEEK-KEFLDNIIDK-----EKK--SPI-         | 1943 |
| CAPITELLA       | -----KKE--KKVTAFLTENPAK-NQLWNNIIVDQ-----DVVY--EPL-      | 1989 |
| LIMPET          | -----TTE--AKFNCLFLSEKPSK-GQFLDNIIDC-----EKMF--EKA-      | 1970 |
| SCALLOP         | -----TTE--AKFVQVFLKEDETK-GDFLDDNIIDK-----ERTV--EFT-     | 2009 |
| LINGULA         | -----TTE--MKFTGLLKEDEK-GDFLDDNIIVDQ-----NRKY--LFEI-     | 1990 |
| OYSTER          | -----TD--AKFVTAFLKEDEAK-GQVFDNIIDK-----DKAY--VTSS-      | 1980 |
| SNAIL           | -----NE--HKVKGFLFQDNTSK-GQFLDENIVDR-----DQKV--EPL-      | 1985 |
| SPONGE          | -----SKK--PQFVGLFKEDVVK-GQLWDMIIIC-----EKVY--EQV-       | 1998 |
| PRIAPULA        | -----TTE--PVYSSLLQENPAK-GQLWDMIIIC-----HRRV--GDR-       | 1998 |
| DANTO           | -----FNE--TKFVQGLFTEKPK-NQFIDMLIS-----QRVY--NPT-        | 2003 |
| ESHARK          | -----FTE--AKFVQGLFSEKAEK-NIFIEHLIA-----KRT--NFPV-       | 2000 |
| BHARK           | -----FTE--AKFVQGLFSEKPEK-NIFIEHLIS-----QRVY--NFPV-      | 1998 |
| XENOPUS         | -----FSE--LKFVQGLFTEKKEK-NLLIEHLIDL-----QRN--TPI-       | 2011 |
| STERLET         | -----FNE--TKFVQGLFSEKPEK-NQFIEHLIDA-----KHTY--SFPV-     | 2015 |
| GAR             | -----FNE--TKFVQGLFTEKPEK-NQFIEHLIDA-----QQTY--RFPV-     | 2004 |
| HUMAN           | -----FNE--LKFVQGLFSEKPEK-NLLIEHLIDL-----KRRY--NFPV-     | 1992 |
| PLATYPUS        | -----FNE--TKFVQGLFTEKPEK-NLFIENLIDL-----KRCY--TFPV-     | 1996 |
| TASDEVIL        | -----FSE--MKFVQGLFTEKPEK-NLFIENLIDL-----KHCY--TFPV-     | 1998 |
| COELACANTH      | -----FTE--SKFVQGLFSEKPEK-SLYIENLIDM-----KCSY--NPT-      | 2003 |
| CAECILIAN       | -----FTD--AKFVQGLFTEKTEK-NLLIEHLIDL-----QRCY--TFPV-     | 2005 |
| CANARY          | -----FTE--SKFVQGLFSEKSEK-NLLIEHLIDL-----KRCY--TFPV-     | 1994 |
| OSTRICH         | -----FTE--SKFVQGLFTEKTEK-NLLIEHLIDL-----KROV--SFPV-     | 1964 |
| GECKO           | -----FNE--SKFVQGLFTEKPK-NLLIEHLIDL-----QHRV--SPI-       | 2003 |
| TURTLE          | -----FTE--SKFVQGLFTEKPEK-NLFIENLIDL-----KRN--SFPV-      | 2003 |
| ALLIGATOR       | -----FTE--SKFVQGLFTEKPEK-NLLIEHLIDL-----KHQ--SFPV-      | 1961 |
| APLYSIA         | -----TD--IKWVFLQDNVVK-GQFLDNIIDM-----DFAH--SDI-         | 2011 |
| TRICHOPLAX      | -----TTE--MKFTVFLFLENVAR-KQFLWENLIDM-----ERE--AFEI-     | 1973 |
| SOFTCORAL       | -----TTL--LKFVNGFLFSEDLK-GQFLDNLVDC-----TKKL--HFEM-     | 1993 |
| STONYCORAL      | -----TD--LKFVVAFLFSENPIK-GQLLDDNLVDC-----NRTY--TEV-     | 2015 |
| SEA_ANEMONE     | -----TTE--LKFVTAFLFENPVK-GQFLDNLIDT-----DRKY--EFV-      | 1986 |
| SEACUCU         | -----TD--VKFNALFLQENPAK-GQFLDENIIDE-----ERSV--EFV-      | 1988 |
| LANCELET        | -----TD--MKFVTAFLFQENTAK-GQFLDNLVDT-----NKLY--QDA-      | 2018 |
| STARFISH        | -----TD--IKFNALFLSENTAK-GQFLDNIIDI-----TKNV--SPT-       | 2023 |
| SEA_URCHIN      | -----DN--IKFNALFLSENHAK-GQFLDNLVDP-----KKEV--GAI-       | 2013 |

Supplementary Figure 6 CLUSTAL OMEGA ALL PHYLA, EXPANDED

|                 |                                                            |      |
|-----------------|------------------------------------------------------------|------|
| PARAMECIUM      | -ETNFEKPLYTEVKKQ-----QQDYFQ-----EKI                        | 1903 |
| TETRAHYMENA     | -ETNFEERSYARTRNIFPSRIKPKFDTKBI---LCKKVLN-----ETVL          | 2020 |
| STYLONCHEIA     | -ETNPNFYIQLKQIEFKIEQANGDISQI---KANNL-----INEYNEK           | 2007 |
| APHANOMYCESa    | -QTAAFPPTYKLSR-----RQGR-----SRTTHRGNRLMDI                  | 1850 |
| APHANOMYCESa    | -ETTSFPPTYKLSD-----ARKR-----TQLRQFORMDI                    | 1797 |
| PYTHIUM         | -ETKAFDRVPLSSFSARTLRNQQEQOQTGGT-----QSTSHTGKRNSST          | 1967 |
| PLASMOPIARA     | -ETENFVTIPLSSSLSTVSLKQRYEVD-----VLENVTRKRNNSA              | 1958 |
| BREIMIA         | -ETEITFTIPLSTLSTVSLQSKLDS-----NMASTNQKRTTEST               | 1944 |
| AEDDES          | -ELEDYPKIKDKIVSIQRLSSDSGKSHS-----NRFKYI                    | 2019 |
| MIDGE           | -EFDELPSLREYIVSIKDLQTASTTSSQ-----RK----                    | 1965 |
| BOMBUS          | -TVAENPKYRKRRLVNIKRRIKQR---Q-----ASSHSYI                   | 1886 |
| ANT             | -TFEYFKREIIVNIKRTTEVDKGR-----QTHRYAVY                      | 1915 |
| WHIPWORM        | FAEEESDQQTDDMSGLNRVLY-----KKAPSI                           | 1954 |
| TRICHINELLA     | IQEEESAGKMYYSRQDRPSSA-----EYENQV                           | 1965 |
| BEEBLE          | -DFDNIKQTKILLNIRDEMRLRKRNN-----K-----QTQSVRYI              | 1883 |
| BARNACLE        | GGS---ELRRHVSIIPRPAAGAGGQAP---RRTGS                        | 1902 |
| THRIP           | -QOHEHLKNVEKIVSIRRNVEAKS-SQ---RM-----NAHKSLLQ              | 1921 |
| FLEA            | -EFENYPKTKKHLVIRKAASVDSE---ELNYL                           | 1911 |
| WHITTEFLY       | FNSDELPKQKTLVSIIRRAARSET---GRA--PI-----QGS--MDI            | 1973 |
| TICK            | -EREVLQKTRHVGVTEGVPS-PSFSGRMAGSL-----RGSLLAQE              | 1946 |
| TERMITE         | -DWEEIPARRKQLVIRCARAQRRETLGFASQSV-----RYIPS                | 1990 |
| DAPHNIA         | -EVERHRKFRHLHL---T---V-----SSENRP                          | 1833 |
| OSTREOCOCCUS    | -EAINPEPDSAEISLKS-----PTRDVSVF                             | 1933 |
| STENTOR         | -QTLFVTEKLEIV-----DEPKL                                    | 1759 |
| KLEBSORMIDIUM   | -ETAELSGARETLRGLRAERKARESRMAA-----GAASQAHAHL               | 2108 |
| CLUBMOSS        | -QTSVLVESHAIKGIKRAMIKGHGPRR-----GTSMTL                     | 1906 |
| MOSS            | -ETSQSSIISQTVKMRADLKARRTRGKGS-----LSQASTI                  | 2014 |
| LIVERWORT       | -ETNQLASSFQTVGMRDERRSRK-TAQGD-----ISASLSTL                 | 2038 |
| LIGNANO         | -QVEQASRKYLVSVRPAASSASDSSASEAGPTDDLWLNPPSSSSTAUSAAGTNSLQFA | 2112 |
| COPEPOD         | -VLDKEFFKRKHLVTRQSDSSSSA---LDIGS                           | 1925 |
| GLOBOSUM        | -DLSAPLIRVLGKD---F-----SEKVMNRKYL                          | 1878 |
| PALUSTRIS       | -----LNDISLQS-RT-----IGTPLARSAYL                           | 1930 |
| NEOCALLIMASTIX  | -EDGVPKPKKR--Y-YENIQYRK-----NIIRKQKDN                      | 2015 |
| GLOMUS          | -ELNQPFPRTKVDDF-RRSRGTKF-----EAIVSNLKYL                    | 2075 |
| LOBOSPOR        | -VLSGPLVKTRLSDL-RTKSLNPN-----KTYSTNYRYM                    | 1996 |
| SYNCEPHALASTRUM | -ELDQPLATTRLGEP-REKSGFRK-----QDNGPRVNYI                    | 1980 |
| FUNCTIVORUM     | -ETNFSVKKVGSY---HA-----ESYTTESRQ-KRS                       | 1966 |
| HALBUM          | -ETNFQISSQLSSA-----VANSQRDLKYL                             | 2111 |
| DPURPUREUM      | -ETNPTVSPSSPQ-----SLFANDLRYL                               | 2104 |
| PVIOLACEUM      | -ETNFINYNYPQ-----SLFSNDLRYL                                | 2100 |
| AMPHIPOD        | -EVGVASKNTRSLVAVRQVLSKSDAVAEAR-----YQPTVLMF                | 2021 |
| SHRIMP          | -EINFKPASKKRFVAVRQKLRRETAREEGAV-----VAGTVQYM               | 2002 |
| MUDCRAB         | -EINLNPGSKRRFVAVRKNLKEANQSSGK-----AAGTVQYL                 | 1997 |
| TARDIGRADE      | -EFIQAPRKKKQLAAIHKEAQDGSKNGVGSLSL-----FGIPTSTYASARLA       | 2052 |
| HYDRA           | -NVS--FERKVMPLIRKASCELGHQPNQ---RE-E-----NEVILSNN           | 1948 |
| SALPINGOBECA    | -ELPAAMSVRSKCVLALREGEATPS---TTAA-A-----TAAARYL             | 1997 |
| SPIDER          | -EIDDSVAKKKNFLAIRHQIRKVFNDSE--RDIS-G-----FQSSLQIF          | 2019 |
| LIMULUS         | -ELEAPMERKKKFLTIREGNKESNG---IE-N-----NFGSVHYF              | 2012 |
| SCORPION        | -ELDJT-TERRRKFI SVRHEKRELS-----NKTLL-N-----FASSLKA         | 1999 |
| ROTLIFER        | -EMENFQKRTKFIIRDEPKVADTMSRSA--NYI-S-----TMSFTSL            | 2003 |
| CIONA           | -EISQPLTKRKKVFAIRKKAEKEGEA---SIQYM                         | 2017 |
| OCTOPUS         | -VFEMQPKKTIPIHFLQKEIKQKVADAS-----QSASYHL                   | 1978 |
| CAPITELLA       | -EMENPIERRKKFVIRTSVRDVPDSE---PT-G-----PASSVHYL             | 2027 |
| LIMPET          | -ELDSPLEKRRKRVFVIRNEVKETRQG--E---EE-E-----SLFSSYNI         | 2007 |
| SCALLOP         | -ELTSPMERKKKQFVSLRKEVQERQEDGV---TM-E-E-----TEYSSFNL        | 2048 |
| LINGULA         | -EITSLPQRKKRVFVIRSEAGAQQDGNSS---QD-S-----AESSVHYL          | 2028 |
| OYSTER          | -ELKAPLSRKKQVSVIRNEVKESNSQNGE---AD-E-E-----GESSLHL         | 2019 |
| SNAIL           | -ELESQFERKKKQVFAIRSEMQEQS---DK-D-----GAISSYHL              | 2020 |
| SPONGE          | -DFEAPLKRKKQITSIRDLLKQSTAAG--NSSGSPSS---S-----PSTRPRYI     | 2041 |
| PRIAPULA        | -ELSAPLQRKKQFVAIRTAVREIDRDADG---QG-A-----PLPSVHYL          | 2037 |
| DANTO           | -EIDVPIERKKKVMIRKEVSG---ENGD-----APVYLS                    | 2034 |
| ESHARK          | -EIEVPLEKRRFVIRKEAREAGDQDGS-----EPQYLS                     | 2034 |
| BHARK           | -EIEVPERKKRFFAIRKEAREASAGSDS-----EPHYLS                    | 2032 |
| XENOPUS         | -EIEVPMERKKKYFAIRKEARDASSTESD-----EPSYLS                   | 2045 |
| STERLET         | -EIEVPLERKKKYFAIRKEARQGGEGSD-----EPHYLS                    | 2049 |
| GAR             | -EIEVALERKKKYFAIRKEAREAGDRDAE-----EPHYLS                   | 2038 |
| HUMAN           | -EIEVPMERKKKYIEIRKEAREANGSDS-----GPSYMS                    | 2026 |
| PLATYPUS        | -EIEVPMERKKKYIAIRKEARDSVNDNSD-----EPHYLS                   | 2030 |
| TASDEVIL        | -EIEVPMERKKKYIAIRKEARDAANGDSE-----GPHYLS                   | 2032 |
| COELACANTH      | -EIEVPIEKKKKYFAIRKEARGSTIGDLD-----EPQYMS                   | 2037 |
| CAECILIAN       | -EIEVPLERKKKYFAIRKEARNTANGESD-----APHYLS                   | 2039 |
| CANARY          | -EIEVPLERKKKYIAIRKEARDAGNSSQD-----EPKYLA                   | 2028 |
| OSTRICH         | -EIEVPLERKKKYIAIRKEARDAGNSGNE-----EPKYLP                   | 1998 |
| GECKO           | -EIEVPLERKKKYIAIRKEARDAMVSDA-----EPHYLA                    | 2037 |
| TURTLE          | -EIEVPMERKKKYFAIRKEARDAVINDSD-----EPQYLP                   | 2037 |
| ALLIGATOR       | -EIEVPMERKKKYIAIRKEARDVNGGPD-----EPQYLP                    | 1995 |
| APLYSIA         | -ELDSPLEKRRKRVFVIRSEAQKRGAGGAGSSGNS-----SATPSLHL           | 2055 |
| TRICHOPLAX      | -ELSYDQKQKTFRSLREQRSSVSSADEADSGIA---M-----APSYHL           | 2016 |
| SOFTCORAL       | -ELSAPLDKRTLLTSIRCEARATRMNSSE---NY-----E-----HGVSLRYL      | 2032 |
| STONYCORAL      | -ELSAPLERKKQFRM---QARIPSPK---ENSLEESAG---R-----TGLSIHYM    | 2055 |
| SEA ANEMONE     | -ELSTPLERKKQMTSIRINARVQSDOVEE---AL-----S-----QGRSVRYL      | 2025 |
| SEACUKE         | -EISAPLERKKKQFVALRQAAAS---GGTFDTGLG---S-----YQRSGRYL       | 2027 |
| LANCELET        | -EFSAPVSRKKQFVIRQELRQDQSPQAG---SSRY-                       | 2050 |
| STARFISH        | -EMNAPMERKKRVFVIRNQIQDVTAGSSQSDSGIE---M-----SGYTRGYL       | 2068 |
| SEA_URCHIN      | -EMDAPVERKKKRVFAIRTAQARETNTPEES---G-----Y-----VSGPAHYL     | 2051 |

Supplementary Figure 6 CLUSTAL OMEGA ALL PHYLTA, EXPANDED

|                 |                                                         |      |
|-----------------|---------------------------------------------------------|------|
| PARAMECIUM      | VKNYLTAASLVE---VPTTMEIEEE---NENL-----                   | 1925 |
| TETRAHYMENA     | SAAFLPANELLSKSEHDI-YEDE---EDESEN-----                   | 2067 |
| STYLONCHIA      | CTFNKTFKAMVFECPDKINIKSEEEKLQK-----                      | 2046 |
| APHANOMYCESa    | SDFLQGLSLGSAAPIEDT---NDDE-----                          | 1874 |
| APHANOMYCESb    | SDFLAGSLSLGSSSEGLS-----                                 | 1817 |
| PYTHIUM         | ALQPTASLSOTMTSEIGSLQLDAE-----                           | 1995 |
| PLASMOPARA      | ALQPTNSLSLMDAVTL-TASTVTEPPD-----                        | 1985 |
| BREMIA          | ALQPTSSLMDAERV-GPSTMTASID-----                          | 1971 |
| AEDDES          | QMTSVFSSSLSDVTKLNLNYSVVRTG-EMATRE-----                  | 2053 |
| MIDGE           | TSSIFPHSLSLKLDLSHSVVFSNR-EALQKQ-----                    | 1999 |
| BOMBUS          | ISYDSSSLSDINA-DPNETIIRN-----                            | 1912 |
| ANT             | HSYVLSAMLEEDINA-DLKCWVLPAN-FHRSIST-----                 | 1950 |
| WHIPWORM        | NEQHLWESLAPSVIQDFTSEFEPINT-ETT-----                     | 1985 |
| TRICHOINELLA    | ELSVLLDSLVMADGDFTESLEARTH-CAETR-----                    | 1998 |
| BEEFLE          | FLRVPNLSLAEDVKFDFTSSLRTQS-DDDA-----                     | 1915 |
| BARNACLE        | VSRLLADSLGSLVDYDFTASVDSLGL-ELQQQ-----                   | 1935 |
| THRIP           | LQSPFLAGSLSDIIRFDFTYSRLKPT-DNHE-----                    | 1953 |
| FLEA            | TGQIFSSLSGDIIEFDMTHNVRRHP-VDHK-----                     | 1943 |
| WHITEFLY        | SDFLAGSLSDLSVLDLNHRVVEVE-AVQEA-----                     | 2006 |
| TICK            | ASQYLSASG---LAFVDET---VSDS-SRGT-----                    | 1973 |
| TERMITE         | ASQYLFDSLNEAVTLDFSTSUVSSTA-RPGHD-----                   | 2023 |
| DAPHNIA         | PSDFLFGSLSDVYRDFNQASLPTKFGSYDEEN-----                   | 1869 |
| OSTREOCOCBUS    | TKGYTLSSSLAAMYSLTKTESCV---TS---DVTD-----                | 1961 |
| STENTOR         | SYVYLSLFLSQQAEIRAKKI-----                               | 1782 |
| KLEBSORIDIUM    | SDFLNTSLRQGGVDFTLGQGARLQADGAV-----                      | 2161 |
| CLUBMOSS        | SDFLVMGSLSQEFLVLSFVQDMSASLPEP-----                      | 1938 |
| MOSS            | SDFYMSLSLSQEPAVIRTFVGGIRKEETS-AAGV-----                 | 2059 |
| LIVERWORT       | SDFYVNIISLQEPAVISFVQSKDHSSEGSASL-----                   | 2084 |
| LIGNANO         | ASQFLADSLSDVSDGLRLVTADLSNT-SDSASLATA---                 | 2166 |
| COPEPOD         | QCHYLDSSLSDISHDYTASLQGVTV---IEVR-----                   | 1957 |
| GLOBOSUM        | SDFLADSLSDMSLFGQKARDARSLT-QSSIPLLSQ-DFSS--              | 1927 |
| PALUSTRIS       | PSDFLADSLSDIITLDRPSTLLA-N-ANGGPVYSA-PTQSS               | 1981 |
| NEOCALLIMASTIX  | FSSFLASLSDSVDFLGN-----DD-MD---FNN-Q---                  | 2057 |
| GLOMUS          | ASQYLDSSVTOGGALKEL-----P-D---ESEGESKNEHSDTI             | 2111 |
| LOBOSPOR        | SDFYLSDSLSDSVGMILE-----SEVYT-D---LDDGTTNQGNDTP          | 2035 |
| SYNCEPHALASTRUM | ASMLAGSLSDSLSLSDALAESGQVSS-MRTDEAVD-D---                | 2031 |
| FUNCTIVORUM     | LINFLADSLRELGLSFTFLGKISR-T-APFLEK-----                  | 2000 |
| HALBUM          | SDFYLDLSDSLDVGSSSTT---ST-STTTTSTN-----                  | 2143 |
| DPURPUREUM      | SDFYLDLSDSLDFISKPLEDEKDLNS-DQPTPT-----                  | 2138 |
| PIVOLACEUM      | SDFYLDLSDSLDFISKPIEDEKVDV-SNNILIG-----                  | 2135 |
| AMPHIPOD        | KSNYLDLSDSLDFSSALVSLG---EKTQHSK-----                    | 2056 |
| SHRIMP          | ASHYLDLSDSLREDSDFDNNSVVLAMSG---TEKSSE-----              | 2037 |
| MUDCRAB         | ASHYLDLSDSLREDSDFDNNSVVLAMSG---REDNQY-----              | 2032 |
| TARDIGRADE      | SASLVQSSFLNEMERDYSEGLDRST-PL--AAR-----                  | 2085 |
| HYDRA           | PSRFLMSLSLSEVMEFINKPKPYTN---NEEKSL-----                 | 1983 |
| SALPINGOEA      | PSDFLADSLSDAAQLEALRQGDVGE-S-AVEDASSSSSSPSSDGP           | 1965 |
| SPIDER          | GSEHLESLSLAEDVNRVFTTNEQIFKP-BGKNEMLNS-----              | 2059 |
| LIMULUS         | ASQYLDLSDSLAEDVNRVFTTNEQIFKP-PIEHMARK-----              | 2052 |
| SCORPION        | PSDFLSDSLSDVNRVDFSSSELAFG-DMKARKARK-----                | 2039 |
| ROTIFFER        | SDFYLSLSELRELVDYFVHVSQYVNSQSSVTR-----                   | 2042 |
| CLIONA          | ---AFLAGSLREIIVDRNRSLVVNT-SSANISMSV--T-----             | 2060 |
| OCTOPOUS        | SSLYLENLSLVDIGRVDYLSNNAHQE-IASISEKEN-----               | 2015 |
| CAPITELLA       | ASQYLAGSLSLDVGDFGSSMVSSAD-S-SFDNQ-----                  | 2064 |
| LIMPET          | SDFNIEEHLSDLNQDFNSGTAQVFF-S-DIFSD-----L-                | 2042 |
| SCALLOP         | ASQYLDLSDLHDVQDFSTAGTQFS-PSPSDKGKTR--LGRIF-----         | 2093 |
| LINGULA         | ASQYLDLSDLSDVAVDYSGLQGERS-E-PVPPRTQ-----                | 2065 |
| OYSTER          | ASQYLDLSDLHDLNQDFATATPQ--MS-E-GSPREKVL--TVRKS-----      | 2061 |
| SNAIL           | ASQYLDLSDLSDLREFTVSGAQNT-S-GIPKTKAS--LRKNS-----         | 2064 |
| SPONGE          | SDFYLDLSDSLSDVQDFTLPHHHQYG-SVGGGASTE---SSSID-----       | 2084 |
| PRIAPULA        | ASQYLDLSDLSDLREDFNVSTQIRER-GDPRAEKPP---EGEAEQ---        | 2086 |
| DANTIO          | SDFYLDLSDLSDVNRVDFSTGVQFSY-NQNPQSGVS-----               | 2072 |
| ESHARK          | SDFYLDLSDLSDVNRVDFSTGVQFSY-NQNPQSGVS-----               | 2072 |
| BHARK           | SDFYLDLSDLSDVNRVDFSTGVQFSY-NQNPQSGVS-----               | 2070 |
| XENOPUS         | SDFYLDLSDLSDVNRVDFSTGVQFSY-NQNPQSGVS-----               | 2083 |
| STERLET         | SDFYLDLSDLSDVNRVDFSTGVQFSY-NQNPQSGVS-----               | 2087 |
| GAR             | SDFYLDLSDLSDVNRVDFSTGVQFSY-NQNPQSGVS-----               | 2076 |
| HUMAN           | SLSYLDLSDLSEEMSDFTSGVQFSY-SGDPRTAT-----                 | 2064 |
| PLATYPUS        | SLSSMADSLSEEMSDFTSGVQFSY-SGDVKSTG-----                  | 2068 |
| TASDEVIL        | SLSYLDLSDLSEEMSDFTSGVQFSY-SGDKSKATV-----                | 2070 |
| COELACANTH      | SDFYLDLSDLSEEMSDFTSGVQFSY-SGDNRAAV-----                 | 2075 |
| CAECILIAN       | SDFYLDLSDLSEEMSDFTSGVQFSY-SGDPATAQ-----                 | 2077 |
| CANARY          | SSSYMDLSDLSEEMSDFTSGVQFSY-SGDVTAAS-----                 | 2066 |
| OSTRICH         | SASYMDLSDLSEEMSDFTSGVQFSY-SGDVTAAS-----                 | 2036 |
| GECKO           | SASYMDLSDLSEEMSDFTSGVQFSY-SGDVTAAS-----                 | 2075 |
| TURTLE          | SASYMDLSDLSEEMSDFTSGVQFSY-SGDVTAAS-----                 | 2075 |
| ALLIGATOR       | SASYMDLSDLSEEMSDFTSGVQFSY-SGDVTAAS-----                 | 2033 |
| APLYSIA         | ASQYLDLSDLSDLNQDFNISSSAQGS-FSQDVKV-----G---SSVP---      | 2096 |
| TRICHOPLAX      | SDFYLDLSDLSEIEISDFNSSTVQVGS-ENNSIKQIP--TR-----          | 2055 |
| SOFTCORAL       | SDFYLDLSDLSEIEISDFSTPIALSG-SESTEQDIA---GGEN---SGTP---   | 2077 |
| STONYCORAL      | YSDFYLDLSDLSEIEISDFSSPIQVHSG-TEARQ--PL---YKL-----       | 2095 |
| SEA_ANEMONE     | SDFYLDLSDLSEIEISDFSTPVQVNI-NYLKRTGKP--DQ-----           | 2064 |
| SEACUCLE        | SDFYLDLSDLSEIEISDFSTPVQVNI-NYLKRTGKP--DQ-----           | 2075 |
| LANCELET        | MOSYLAGSLSEIEDIISDFSTGVQVHS-DFTSSVGER--YQASG---         | 2097 |
| STARFISH        | SDFYLDLSDLSEIEISDFSGGQVFNQ-SI-DKQSL--SSRSSVP--H---IK--- | 2114 |
| SEA_URCHIN      | SDFYLDLSDLSEIEISDFSSSVRHFGS-SM-E-SRQD--GSQSG---         | 2100 |

s2041 s2056

Supplementary Figure 6 CLUSTAL OMEGA ALL PHYLA, EXPANDED

|                 |                                                        |      |
|-----------------|--------------------------------------------------------|------|
| PARAMECIUM      | -----QSTVEVQKTEMOEVRKHLMIPLSLIDFMANK-Q                 | 1959 |
| TETRAHYMENA     | -----LP---F-----GDQTGENLEMLDIRHPMPVTVLTIDKMQVQ--       | 2102 |
| STYLONCCHIA     | -----ML---DKSAADESEIQDVSQLELDNVNKHPCMKNIKRIDKMSL--     | 2089 |
| APHANOMYCESa    | -----PMANDEEDEDLEMDALNSHPMLPLKIKHMERLF-                | 1912 |
| APHANOMYCESa    | -----SNPTSEETEDEVLELDLIMMHPMIPLMQIKHMETLF-             | 1855 |
| PYTHIUM         | -----LVAREALYQGDIELELDSDHPCMIPLLRVLQMKTFD-             | 2033 |
| PLASMOPARA      | -----INRGASLYQDIELELDKINQHPMIPLLRVLQMKTFD-             | 2023 |
| BREMIA          | -----IDQAVANQNIIVKLDLNOHPMIPLLRVLQMKTFD-               | 2009 |
| AEDDES          | -----AEFEAALKQHRATVSLERKINDHVMATTICAVIQHMHEN-K         | 2094 |
| MIDGE           | -----QQRMEDEQRTMRLQLESTPINNHVMVSLVGVVNHMHKC-R          | 2040 |
| BOMBUS          | -----KHDSTDKKESMSLTFEMOELNHPCHASICGVLSHMIEEKI          | 1953 |
| ANT             | -----TNSDLSLRTHMATSALHSQDEKEMPTVLCVLRHTRKIF-           | 1992 |
| WHIPWORM        | -----SAAIFSVYKLPARSDVAHPMFSVSVIQCQVVEKFG               | 2023 |
| TRICHIANELLA    | -----TESANDKDVMKFYKTKLDLLOHPMOMAVNNINYM-DHMG           | 2039 |
| BEEFLE          | -----ESNELPVQSEIELELDLITHECMANVCGVIEHMFRA-G            | 1953 |
| BARNACLE        | -----AEGGRERSAPASLQLPADDLNEHECMACATVALGHLAER-V         | 1976 |
| THRIP           | -----ADAEKSVIMLENSLDHECMPTCVSIIIRHLVDC-G               | 1988 |
| FLEA            | -----TKVENFGTIYLETDFLNDHECMSIICGVIGHMVTK-G             | 1980 |
| WHITETFLY       | -----QVAAGSDINESACLEEMDVINEHECMPLTAVINMTKDA-Q          | 2047 |
| TICK            | -----QAPAKEPVSRKVMLEDDALNGHECMASVCAVLCRMADL-G          | 2014 |
| TERMITE         | -----LKPTEKSGAESTEVILESDDLNHPMATLCOVIEHMQVQ-G          | 2064 |
| DAPHNIA         | -----LPVSSPTISDASSVLYLDDLKHSCMSLLVFNLFNNFYAN-Q         | 1911 |
| OSTREOCOCCUS    | -----K-----ETETPAKGEPRDVLNHPMDGVFRILKLVTKST-G          | 1996 |
| STENTOR         | -----LVNNDDEEKSNVTEFADELNHPKPLDLELTERMELN-F            | 1823 |
| KLEBSORMIIDIUM  | SASMLPDAPSGVYBQCEPAAPADESSVTSALDELDKHPMAYLRLVLEHLKQK-Q | 2220 |
| CLUBMOSS        | -----DENVEQAANEOTEHEHVEFVALDQDDFQHPMVGVLRLIDHLSR-F     | 1984 |
| MOSS            | -----ST---ETNIEATABQEEIETTTALDRDDFQHPMPVILRLAEHVVK-F   | 2104 |
| LIVERWORT       | -----VASGDKSVQENSSVDHMDVTIPDQDDFQHPMEVLKLERLHKS-F      | 2133 |
| LIGNANO         | -----R-KNRFHNQTLTATRNLIVLESDSVNDHPCMATWALLRHMKA-F-K    | 2211 |
| COPEPOD         | -----KDTPELVEPIYINIEBEDALGHPMAQLAVAEHMTAC-N            | 1997 |
| GLOBOSUM        | -----LS-LAAASAVNDASNALEMDLNEHCMSRGLSVIQRLS-K--         | 1966 |
| PALUSTRIS       | -----QGEVMNAS--PTGDQRSLIFDHNHCMSRIVLVKKNLNAV--         | 2020 |
| NEOCALLIMASTIX  | -----N--KNEI--KKNYEYNETFFDKCVNDHICMPTILKIKKISNN-S      | 2098 |
| GLOMUS          | -----PME-IDERVENKSKLELEIDVNSHPMKNMIRVDRLSHQ-L          | 2152 |
| LOBOSPOR        | -----ELSGPNPNAVSEVKEEHEHMLLDALNSHPMKNMLLVINELHST-I     | 2083 |
| SYNCEPHALASTRUM | -----EP-----GEVSGRGENLEMDVFNKHPMPFVOTIKRLHST-I         | 2069 |
| FUNCTIVORUM     | -----M-----QNPVAVDVSFAKEVLELDLNOHPKMSMLLDLDBMYKL-F     | 2043 |
| HALBUM          | -----N--NNLKIVASAMNMPLELDKINSHPMOPMLKIIDYQER-F         | 2183 |
| DUPURPUREUM     | -----PVSTSPHIHQSDIRIDQVNSHPMIAMLKIIDFYQNK-F            | 2176 |
| PVIOLACEUM      | -----Q--KNNSITVNEIDTDIRIDQINSHPMIALKIIDYQLK-F          | 2175 |
| AMPHIPOD        | -----PRDITTEGTLPMPTLETDFNSHVMPELTAVLHHIHR---           | 2093 |
| SHRIMP          | -----RVTGANEMGGVLPVHMDSYNGHEVMANLTAVINHMVDA-E          | 2079 |
| MUDCRAB         | -----RIASNDTEGELLRMNFQSDYNGHEVMANLTAVIYHMVDA-K         | 2074 |
| TARDIGRADE      | -----EDAMGTIELEMDALNOHEMAYLVGLVQHMVEK-K                | 2119 |
| HYDRA           | -----NEE-----ESVESFLELDLNOHECMSKYISLINHMKNK-N          | 2018 |
| SALPINGOCEA     | -----EDS--PGAPSNIPVYVVEDSQHEMDELNSHESMVSMLGIQRIQAV-H   | 2099 |
| SPIDER          | -----MSS--KN-----TYVADYLELD-DLNLNOHMSMLSLIRSMKNK-S     | 2097 |
| LIMULUS         | -----YSS--NPEQERQVIMVNDYIELEMDLDRHECMASLTALLQTMQK-G    | 2097 |
| SCORPION        | -----SNP--SNEAKDDLVSNITVLELDLNOHECMSLTMELVQHEKLI-Q     | 2084 |
| ROTIFFER        | -----SFR--RKYTDDLELNSQSVLELELDLNOHSMNDLISLFGQSLVM-K    | 2087 |
| CLONIA          | -----ENT--DSOPAIATFSGNPEVLEHVSLEHECMPLAVGLITHMHEN-N    | 2105 |
| OCTOPOUS        | -----SA--NSSALISEE--KIIDYALEMDLNOHECMPLVAVLKHMYQK-N    | 2057 |
| CAPITELLA       | -----E--SSIEVPDVVLKEHYIEMEMALNOHPMAALSALLQHMKNL-Q      | 2107 |
| LIMPET          | -----TSS--SNVQPDQFNTVDYIELELDLNOHECMATWALLKHLHT---     | 2085 |
| SCALLOP         | -----NDP--DDTETKVVVDDYVLELDLNOHECMATLIALLOHMERAG       | 2138 |
| LINGULA         | -----R--AVSEEAAPAEADYEEIEMDELNOHECMATMALLKHMQRN-K      | 2108 |
| OYSTER          | -----TDE--EDDTEKVMVEDDYVLELDLNOHECMANMIALKHMQRN-K      | 2106 |
| SNAIL           | -----GGDNKVRLDGDYVLELDLNOHECMAPLVALLKHIIKRN-K          | 2104 |
| SPONGE          | -----DSG--NSQEASSYVV--SEEQLEDDLNEHMTPLMKLIDHMIIN-K     | 2127 |
| PRIAPULA        | -----MDV--NEEESGATLAGDYVEMDELNOHECMASVVALINHLATT-V     | 2131 |
| DANTIO          | -----SSR--MRER--KEVLSQDETVELEMDLNOHECMANMTALLRHMQRN-N  | 2116 |
| ESHARK          | -----RSR--RKEQAEVLSQSDIMELEMDLNOHECMANMTALLRHMQRN-N    | 2117 |
| BSHARK          | -----RFR--KTEWTESNIMDLNIVLEMDLNOHECMATWTALLKHMQRN-N    | 2115 |
| XENOPUS         | -----ASR--KKEQITTEGKTFDDVMEFEMDELNOHECMAMTGLIKHMNRS-E  | 2128 |
| STERLET         | -----RGR--RRER--VESLVQDDVLEMDLNOHECMASMTALLRHMQRN-N    | 2131 |
| GAR             | -----PSR--RRDG--AEAALQDDVVLEMDLNOHECMASMTVLLNHMQRN-N   | 2120 |
| HUMAN           | -----RFR--RREQ--RDPVTVDVLEMDLNOHECMAPLVALKHMQRN-L      | 2108 |
| PLATYPUS        | -----HFK--RREY--RDPVTQSDVLEMDLNOHECMATMTALLKHMQRN-Q    | 2112 |
| TASDEVIL        | -----HFR--RRER--IDSMVQDDVLEMDLNOHECMATMTALLKHMQRN-H    | 2114 |
| COELACANTH      | -----HSR--RKER--TESVQDDVMEFEMDELNOHECMAMTGLIKHMQRN-K   | 2119 |
| CAECILIAN       | -----HSR--KREH--PEFTVQEDVMEFEMDELNOHECMAMTGLIKHMQRN-Q  | 2121 |
| CANARY          | -----RFR--RKEP--TEYKVLNDEMELMEDEFNOHECMASMTSLIKHMERN-Q | 2110 |
| OSTRICH         | -----RFR--RKEP--TEYKVLNDEMELMEDEFNOHECMASMTSLIKHMERN-Q | 2080 |
| GECKO           | -----HFR--RKEP--TESMGLDIMELEMDLNOHECMASMTSLIKHMERN-N   | 2119 |
| TURTLE          | -----HFR--RKEP--TESMPODIMELEMDLNOHECMASMTSLIKHMERN-Q   | 2119 |
| ALLIGATOR       | -----RFR--RKES--TESMVLDEMELEMDLNOHECMATMTALLKHMQRN-Q   | 2077 |
| APLYSIA         | -----GS--EESQSEPGVSGDYMELEMDLNOHECMAPLIALRHMVAT-K      | 2140 |
| TRICHOPLAX      | -----ETG--DSEKAKTIINKFADELELDLNOHECMALTLVLLDHMAVN-K    | 2100 |
| SOFTCORAL       | -----AS--PKE--SDSDISS--EELMDELNRHOCMTTLVGLINHLVKN-K    | 2117 |
| STONYCORAL      | -----SSS--TAEQTDWYEVSE-DTLEMDLNRHOCMAKMSLLKHLVDK-K     | 2139 |
| SEA ANEMONE     | -----LGEDSYEIGE--DVEMDLNSHCLTKICSLTHMKES-N             | 2101 |
| SEA CUCUR       | -----MNQ--TEVAGQEEELGDYLEMDELNOHECMASVAVLQHMERN-K      | 2120 |
| LANCELET        | -----LQA--RQQQSSSVNIHGDFLEIEMDELNOHECMSSMAVILQHMARN-N  | 2142 |
| STARFISH        | -----KRY--SNETPTVVVQGEYIEMSDALNOHECMASLTAVLKHMQAN-K    | 2159 |
| SEA URCHIN      | -----MAS--RQDSKPVFSPGGEYLEMDELNOHECMAMTGLIKHMNTN-K     | 2145 |

Supplementary Figure 6 CLUSTAL OMEGA ALL PHYLA, EXPANDED

|                 |                                                       |      |
|-----------------|-------------------------------------------------------|------|
| PARAMECIUM      | NFQQQIAGQ---QQTQQTQQEEEMPSMTALIKQVF-ND-----DS--LYL    | 2005 |
| TETRAHYMENA     | -----FP---LTRAMPQMNLLLEEV-KK-----DS--CSL              | 2133 |
| STYLNONCHIA     | -----FKREWDQNTNEMPKFMNLCLEI-KR-----PD--IHLNFKI        | 2125 |
| APHANOMYCEsa    | QSQ-----WTDAMPQMDKWFVNL-S-----TN--SSTSVRL             | 1944 |
| APHANOMYCEse    | HSQ-----WSNTAMPQMEKWFVNL-S-----SH--SSTAVRI            | 1887 |
| PYTHIUM         | ADS-----WDGKTMQMKQIFNVY-AD-----ST--TEVGVRL            | 2066 |
| PLASMAPORA      | GSN-----WNAKVMQKQIFDVI-VD-----LS--TGLNIRL             | 2056 |
| BREMIA          | GSS-----WSTNSMPPMKKIFNVI-VE-----AS--TGLNVRFL          | 2042 |
| AEDDES          | ITPVVEG-A-----R--ATPPPVKFLAASL-RD-----QQ--QHKVRL      | 2130 |
| MIDGE           | ITPFDVF-E-----KCDEKFEVYLSLAEPL-RS-----RN--VHKVVRM     | 2078 |
| BOMBUS          | SVPPFDD-----TTTVPKMLCKFLSS-PT-----TT--NYNVVRL         | 1987 |
| ANT             | -----RL-----SDKPELRLLEIM-QC-----D--AQVHQL             | 2020 |
| WHIPWORM        | NIGA-----E-KGSMPRMLFMKDFM-QF-----GSINVKI              | 2054 |
| TRICHINELLA     | MIPY-----EAGTPLPAMMASMRDFL-NF-----GSINVRFL            | 2071 |
| BEEBLE          | ISEFPDE-----EEQYLPANLQAIRTL-LD-----EN--TAVNVKI        | 1990 |
| BARNACLE        | -WPLPEV-----GPPAQAPVVTALCARL-QS-----DN--TPDNVLL       | 2012 |
| THRIP           | ISPAPVQ-----GAKPTLPEWMDLKNL-TD-----LS--NPRNSQI        | 2025 |
| FLA             | ISPLAQSSINHGINTKQSSVPMPSMEALVQVL-AN-----AE--TPVNI     | 2030 |
| WHITEFLY        | LIQPPPE-I-----IGSSDLPMIKPIHQAL-IN-----QN--VHKNI       | 2085 |
| TICK            | IIPQTADDE-----VNIQPAKMLTFLTNAT-VG-----NH--TTRNLC      | 2053 |
| TERMITE         | ISPTPDA-E-----TKDAALPPVMSMRKCL-SD-----YS--QPRNIRL     | 2102 |
| DAPHNIA         | TL-----LANSPPKMITLREAL-LN-----PN--AHNVVRL             | 1942 |
| OSTREOCOCCUS    | LTTGG-----NSELPPSIQLLEAII-SLL-----YTPP--ILPAVLV       | 2032 |
| STENTOR         | A-----DSQEMQWQCLHSDI-SN-----NS--NFLAIRL               | 1853 |
| KLEBSORMIIDIUM  | GA-----E-PAEMPPMDAHHKSL-TS-----PA--TPIVRL             | 2252 |
| CLUBMOSS        | GST-----S-SQOMPEMKSIHATL-ES-----SS--THANVRL           | 2016 |
| MOSS            | GAN-----YQPGVMDNPKSLHATL-DN-----AA--THINVRL           | 2137 |
| LIVERWORT       | GSG-----N--REMPEMKALHSTL-QN-----AG--THINIRL           | 2164 |
| LIGNANO         | LIPQLEGG-----VKPTQMPKMNMLQKV-SN-----SSTDSPVRI         | 2251 |
| COPEPOD         | IYSTPTEN-----FSNPTLPSMQSIHVDL-V-----EGSTPRVRL         | 2035 |
| GLOBOSUM        | --PGA-----DOEMLWMLKSLHGKM-EK-----PD--AHINVR           | 1997 |
| PALUSTRIS       | --PNT-----DGRPTVMQELKKM-SE-----TD--TPLNVR             | 2051 |
| NEOCALLIMASTIX  | MKAPTQ-----ETTPAVMNAILKTF-TSY-----A--THINVKI          | 2132 |
| GLOMUS          | TKPVDP-----VESMPGMMNDIYKFF-TNIGENKEND--THINIRL        | 2193 |
| LOBOSPOR        | TPPPKEMA-----KESAMPKMKDTHRKL-VN-----PN--TNLVR         | 2121 |
| SYNCEPHALASTRUM | SPDP-----TKTTPAVMNTLLSTP-KKAEN--ND--SGLFLR            | 2105 |
| FUNCTIVORUM     | QQ-----DFSKVEKFMQEHKSL-SG-----KD--SPPHLL              | 2075 |
| HALBUM          | RESI-----DQSPNDMPKMNELYLKKN-DN-----TN--LHPNLL         | 2219 |
| DPURPUREUM      | VIPPTQGLFAQ-----QTQHKLTPSDMPKMYEIQKL-Q-----QG--VHPNIV | 2221 |
| PVIOLACEUM      | VSTTPT-----IGEPQLSDMPKMTIYNKI-ND-----SD--LHPNII       | 2214 |
| AMPHIPOD        | -----LTE-----D--KSQSSPPLMTEILKEL-SN-----SK--APRNVRL   | 2127 |
| SHRIMP          | IMVLHGGDT-----V--PKATDVPQMTLVQQL-DS-----AD--TPRNVRL   | 2119 |
| MUDCRAB         | IMMLHKEDS-----T--PSAAETPPMTIQQKL-ES-----GE--THRNVRL   | 2114 |
| TARDIGRADE      | ITPTVKDP-----LDNPSPPAIIISALAGEL-KS-----ST--AHLNVRL    | 2157 |
| HYDRA           | IYIQPNK-----EVKDMPPMTYFHGKI-TN-----KD--TEFNVV         | 2055 |
| SALPINGOBECA    | AESKPORNE-----DGLILPSSTMPMSNLLKSP-ES-----TS--TSHNVR   | 2142 |
| SPIDER          | FISDEK-----AGAPPAMLSATVQSL-ED-----RK--SSDNVRL         | 2131 |
| LIMULUS         | I1AATD-Q-----KSTTPVPKFLEGLCKL-NN-----SE--VHKVRL       | 2134 |
| SCORPION        | LLSS-----SPKEEKLDMCKKL-ED-----YG--VIRNIRL             | 2117 |
| ROTIFFER        | ITPIYDNG-----QLSPMPMTYVHKKL-LD-----VY--THEVRL         | 2125 |
| CIONA           | IGFPEEK-----EESSLRSMSSIHKKL-SG-----SS--TSKNVRL        | 2143 |
| OCTOPUS         | ITPKPE-----NKEMPPMNYLRKPK-IA-----SS--THLNIRL          | 2090 |
| CAPITELLA       | ITPEVEKG-----SKPSSMPDMKNIHDKI-KN-----SD--TQLNIRL      | 2145 |
| LIMPET          | VITPVLKG-----TIPKEMPTMSYFSEKM-TN-----PA--TSFNIRL      | 2123 |
| SCALLOP         | VTPPVVTG-----TAATMPGMDYLHTKI-KS-----AK--THVNVRL       | 2175 |
| LINGULA         | ITPDVSN-----PLDVPVMKYLRDKM-NS-----TT--THINVR          | 2144 |
| OYSTER          | I1PLVESG-----VVPELPAVMKNLNDKI-RS-----PR--THNNIR       | 2143 |
| SNAIL           | IFPAAQSD-----ASSQDMQVMVFLHDKM-TK-----NTGSDTLNIRL      | 2144 |
| SPONGE          | ITPAPSGD-----SPEMPPMTPLHKRM-TD-----SR--TGRNIRL        | 2163 |
| PRIAPULA        | C--PIQAA-----SSPAHMPAMMELHGGK-SH-----VE--TPLNVR       | 2167 |
| DANTIO          | ITPKVEEG-----VRPSDLPPMKFLQKGL-DN-----PS--TPLNIRL      | 2154 |
| ESHARK          | ITPQVEEG-----KTPQELPPMKFLHGKL-GN-----SG--IPLNIRL      | 2155 |
| BHARK           | ITPKVEEG-----KTPHELPPMKFLHGKL-GN-----SA--TPLNIRL      | 2153 |
| XENOPUS         | ITPKVDED-----ASPQELPSMKFLHVKL-GN-----TS--TPLNIRL      | 2166 |
| STERLET         | ITPKVDEG-----TVPADLPPMKFVHGKFL-GN-----AS--THLNIRL     | 2169 |
| GAR             | ITPEVEEG-----TVPSDLPPMKFLQKGL-GN-----PS--TQLNIRL      | 2158 |
| HUMAN           | GPPQGEED-----SVPRDLPSMKFLHGKL-GN-----PI--VPLNIRL      | 2146 |
| PLATYPUS        | ITPKVEEG-----SGSTNLPPMKFLHGKL-AN-----PL--GALNIRL      | 2150 |
| TASDEVIL        | ITPHVKEG-----SEPPSLPPMKFLHNKL-EN-----PS--TPLNIRL      | 2152 |
| COELACANTH      | ITPQVEEE-----SGPVELPPMKFLSHKL-AN-----PA--TPLNIRL      | 2157 |
| CAECILIAN       | ITPKVEEG-----TVPQDLPPMKFLHGKL-GN-----TS--TPLNIRL      | 2159 |
| CANARY          | ITPKVEEG-----TVPADLPPMKFLHGKL-GN-----PS--VPLNIRL      | 2148 |
| OSTRICH         | ITPKVEEG-----TVPVLDLPPMKFLHGKL-GN-----PS--VPLNIRL     | 2118 |
| GECKO           | ITPTVEEG-----AVLPDLPPMKFLHGKL-GN-----PS--VPLNIRL      | 2157 |
| TURTLE          | ITPKVDEG-----TVPRDLPPMKFLHGKL-GN-----PS--MPLNIRL      | 2157 |
| ALLIGATOR       | ITPQVDEG-----AVSVALPPMKFLHSGKL-GN-----PS--VPLNIRL     | 2115 |
| APLYSIA         | ISPPEPTAG-----APAKEMPMMPYLHDKM-SS-----PS--SHVNIRL     | 2178 |
| TRICHOPLAX      | INPAIEKD-----TTPSEMPMSVVALRKA-SD-----HT--TNRNIRL      | 2138 |
| SOFTCORAL       | ISPQEQG-----KEANEMPPMSYLHKKI-SH-----HS--SELNVR        | 2155 |
| STONYCORAL      | ISPQVQK-----VPPTDMPAMAPLHKKI-AS-----SS--THLNIRL       | 2177 |
| SEA ANEMONE     | ISPQPDKG-----ALPKDMPSMSALHKKI-TN-----FE--THLNIRL      | 2139 |
| SEACUCU         | ITPEVTOA-----KQSSNMPPMKMLHGKM-SS-----SE--TSVNIRL      | 2158 |
| LANCELET        | ITPQVQK-----AAPKDMPPMSCLNKKL-GG-----SS--THKNVRL       | 2180 |
| STARFISH        | ITPEIPEG-----SKASEMPPMSLQKKL-TS-----QS--THVNIRL       | 2197 |
| SEA_URCHIN      | INPDITKA-----TKAEMPMMSGLQKKL-SS-----QS--TEHNIRL       | 2183 |

Supplementary Figure 6 CLUSTAL OMEGA ALL PHYLA, EXPANDED

|                 |                                                            |                  |      |
|-----------------|------------------------------------------------------------|------------------|------|
| PARAMECIUM      | LKLIIN-KSD                                                 | IFNRYASGWIGVLL   | 2028 |
| TETRAHYMENA     | LKIVLN-KPL                                                 | LFKESYQQWFDVLV   | 2156 |
| STYLNCHIA       | LKLIIN-HPO                                                 | LFSAYAKWFEPVIA   | 2148 |
| APHANOMYCEsa    | CKVVLN-RPM                                                 | LFAPYAAKFGVPLV   | 1967 |
| APHANOMYCEsa    | CKLVVN-RPG                                                 | IFEPYAAKFGVPIV   | 1910 |
| PYTHIUM         | VKIVLN-VPD                                                 | VFAYADKWAEKLM    | 2089 |
| PLASMOPARA      | AKVVLN-VPS                                                 | VFSTYSLWLPVAVM   | 2079 |
| BREMIA          | AKVVLN-VPD                                                 | VFPLYSESWLRAVI   | 2065 |
| AEDES           | AKVIDN-CRT                                                 | WLKPYAATLIPPLM   | 2153 |
| MIDGE           | AKLIEB-CRD                                                 | VFVYAKFLLGPPVM   | 2101 |
| BOMBUS          | LKIIIN-MQT                                                 | VFQPYAKFFLQPIM   | 2010 |
| ANT             | LKIIEHFADE                                                 | VFKPYARFALQII    | 2044 |
| WHIPWORM        | ARLLIN-LEQ                                                 | IFLPCYEWFDVVA    | 2077 |
| TRICHINELLA     | ARIIVD-CPH                                                 | VFRPPYLEWISPII   | 2094 |
| BEEBLE          | VKVIDN-TIH                                                 | IFKHPKSKYPTPELL  | 2013 |
| BARNACLE        | CRLLIN-CDS                                                 | ACRPYGRWLLPPLL   | 2035 |
| THRIP           | LRVILN-CEV                                                 | YFSTYAMVMEPML    | 2048 |
| FLEA            | MRIIDN-CQI                                                 | VFRPYAHHILTPIL   | 2053 |
| WHITEFLY        | CKLILN-VSE                                                 | VFAPYASHFILSIS   | 2108 |
| TICK            | CRVVVN-SAE                                                 | VLRVHSRHLVPALL   | 2076 |
| TERMITE         | LKIIIN-VES                                                 | KFHPYAHHMNSIL    | 2125 |
| DAPHNIA         | IRLVVN-LKS                                                 | IFRIYANFWYKALL   | 1965 |
| OSTREOCOCCUS    | VKALLR-LNHELASDSDSDISMHSVCTSPSLLA                          | ANPDVMSLLTATI    | 2078 |
| STENTOR         | VKIIIN-RPQ                                                 | SFKKWAIDLWGPIC   | 1876 |
| KLEBSORMIDIUM   | AKIIVN-ARK                                                 | LFQPFKREWPAPLI   | 2275 |
| CLUBMOSS        | CKVVVK-ARK                                                 | VFARPSDTFFQPLV   | 2039 |
| MOSS            | AKVITK-TRK                                                 | IFAPHAADWIRPVV   | 2160 |
| LIVERWORT       | TKVVVR-TWR                                                 | VFAPFAQVWFIPVV   | 2187 |
| LIGNANO         | MKLLIN-CQD                                                 | IFQPYAHFWLRPMC   | 2274 |
| COPEPOD         | LKFIYN-CSE                                                 | IFLPCINWYTPIL    | 2058 |
| GLOBOSUM        | AKIILN-VPN                                                 | IFAPFAKYWWRPIA   | 2020 |
| PALUSTRIS       | AAIVMN-VPE                                                 | AFSANAGEWWRCPA   | 2074 |
| NEOCALLIMASTIX  | AKLIMN-YSD                                                 | PFIPVNSWYIPLV    | 2155 |
| GLOMUS          | AKIIVN-VPE                                                 | AFEKYASLWIRPVI   | 2216 |
| LOBOSPOR        | AKIVIN-IPB                                                 | AFEMYAHSWIRSLM   | 2144 |
| SYNCEPHALASTRUM | AKVILN-LPA                                                 | AFEPYADFWIRPIM   | 2128 |
| FUNCTIONORUM    | LKIIIN-RPL                                                 | YFKAYSYSWIGALI   | 2098 |
| HALBUM          | LKVIIN-RQO                                                 | YFRYHQRWTPILI    | 2242 |
| DPURPUREUM      | LKIIIN-RPS                                                 | YFERPHELWIPILM   | 2244 |
| PVIOLACEUM      | LKIIIN-RPQ                                                 | YFERFYKYWVPILL   | 2237 |
| AMPHIPOD        | LRLLTN-TAQ                                                 | LFAPYARHASRAVL   | 2150 |
| SHRIMP          | LRVMMN-NAR                                                 | IFEPYAAHFVSTIL   | 2142 |
| MUDCRAB         | LRMMN-TSR                                                  | VFAPYAVHINPVL    | 2137 |
| TARDIGRADE      | AKLIMN-VENVSSETETPSSGGGNPPGTEEPGPPGTEEPDPTLPYFYQAEFLYGPILL |                  | 2216 |
| HYDRA           | ARIVIN-EPK                                                 | LFQPYAQFWFLPII   | 2078 |
| SALPINGOECA     | AKLITN-MPD                                                 | AFQPVSSRWLRPIM   | 2165 |
| SPIDER          | ARFIVN-NAE                                                 | LFQPYAEFLMGPIL   | 2154 |
| LIMULUS         | ARLVVN-NAQ                                                 | IFQPYAGSLLDPLI   | 2157 |
| SCORPION        | AKLFIN-NAE                                                 | IFKPYAVFLLQPLI   | 2140 |
| ROTIFFER        | IRAIIN-TES                                                 | IFKPYCKFWISALI   | 2148 |
| CIONA           | AKLIIIN-CEQ                                                | YFRPYAHHITPILA   | 2166 |
| OCTOPUS         | AKLIVN-TAE                                                 | IFEKYASFVWLPLS   | 2113 |
| CAPITELLA       | AKVILN-GES                                                 | VFRPYASFVWQPLV   | 2168 |
| LIMPET          | ARLIFN-TSE                                                 | VFQPYTKFWLRPLC   | 2146 |
| SCALLOP         | AKLVSN-CTQ                                                 | IFQPYARYWLRPLS   | 2198 |
| LINGULA         | AKLILN-AEE                                                 | VFAPYAKFWLGPLV   | 2167 |
| OYSTER          | AKLITN-TAE                                                 | IFRPPYARDWIRPLT  | 2166 |
| SNAIL           | AKLITN-TSE                                                 | IFQPFARLWLRPLC   | 2167 |
| SPONGE          | VRLITN-RPK                                                 | IFQPYAKHWLPVLT   | 2186 |
| PRIAPULA        | ARLVVN-CAH                                                 | AFRPPCAASWLAAPLM | 2190 |
| DANTIO          | AKLITN-TEE                                                 | IFRPPYAKHWLGPLM  | 2177 |
| ESHARK          | AKLIVN-SEE                                                 | VFRPYAKHWLGPLL   | 2178 |
| BHARK           | AKLIVN-TEE                                                 | IFQPYAKHWLGPLL   | 2176 |
| XENOPUS         | AKLIVN-TEE                                                 | VFRPYARFWIGPIL   | 2189 |
| STERLET         | AKLITN-TEE                                                 | VFRPYARHWLGPLL   | 2192 |
| GAR             | AKLIVN-KEE                                                 | VFRPYAKHWLWPLL   | 2181 |
| HUMAN           | AKLIVN-TEE                                                 | VFRPYAKHWLSPLL   | 2169 |
| PLATYPUS        | AKLIAN-TEE                                                 | VFRPYARHWLGPLL   | 2173 |
| TASDEVIL        | AKLITN-TEE                                                 | VFRPYAKHWLNPPL   | 2175 |
| COELACANTH      | AKLIVN-TEE                                                 | VFRPYAKHWLGPPF   | 2180 |
| CAECILIAN       | AKLIAN-TED                                                 | VFRPYAKQWLGPLL   | 2182 |
| CANARY          | AKLIVN-TED                                                 | VFRPYAKHWLGPLL   | 2171 |
| OSTRICH         | AKLIAN-TED                                                 | VFRPYAKQWLGPLL   | 2141 |
| GECKO           | AKLIVN-TEE                                                 | VFQPYAKQFLGPLL   | 2180 |
| TURTLE          | AKLIVN-TEE                                                 | VFRPYAKQWLGPLL   | 2180 |
| ALLIGATOR       | AKLIVN-TEE                                                 | VFRPYARHWLGPLL   | 2138 |
| APLYSIA         | AKLIVN-CTK                                                 | VFQPYAKFWLRPFC   | 2201 |
| TRICHOPLAX      | AKLITN-RPK                                                 | IFRPPYAKFWLVPIL  | 2161 |
| SOFTCORAL       | AKLITN-LPE                                                 | VFEPPYAKFWLDSLM  | 2178 |
| STONYCORAL      | AKLITN-EAK                                                 | IFEAHAKFWFNPLM   | 2200 |
| SEA ANEMONE     | AKVILN-OSQ                                                 | VFEPPYARFWLSPML  | 2162 |
| SEACUKE         | ARLIVN-CSK                                                 | VFEPPYAKFWLNPLI  | 2181 |
| LANCELET        | AKLIVN-NEE                                                 | VFRPYARFWLSPML   | 2203 |
| STARFISH        | ARLITN-NNE                                                 | VFTPYARFWLSGLL   | 2220 |
| SEA_URCHIN      | ARLVVN-AQD                                                 | VFQPYARFWLSPML   | 2206 |

Supplementary Figure 6 CLUSTAL OMEGA ALL PHYLA, EXPANDED

|                 |     |                         |                        |                 |           |        |      |      |
|-----------------|-----|-------------------------|------------------------|-----------------|-----------|--------|------|------|
| PARAMECIUM      | DYC | -----TK--ENKIN          | ---G-GK-GPHYFLR        | --DVIVVLI       | -K        | SQK    | 2060 |      |
| TETRAHYMENA     | DYA | -----KL--               | ---NDN                 | ---G-SK-FPHYFLR | --DVVTELI | -D     | CCKS | 2186 |
| STYLNONCHIA     | NYL | -----CD--KNN            | ---G-GK-GPHYFMR        | --DLCLLLI       | -S        | NYI    | 2178 |      |
| APHANOMYCESa    | ELM | -----LL--V              | ---PK-RD-EPHYLLR       | --DVCHVVVD      | T         | NOV    | 1996 |      |
| APHANOMYCESa    | ELI | -----VE--V              | ---PK-LD-EPHYILR       | --DICHVVVD      | T         | WHL    | 1939 |      |
| PHYTIUM         | EVI | -----IE--               | ---ATMVSSDK-KA-EFNYMIR | --DCCHLADEN     | K         | KNV    | 2125 |      |
| PLASMOPARA      | KAL | -----LD--V              | ---SAVQK-VS-EFNYILR    | --DCCLVLVLS     | K         | KDV    | 2112 |      |
| BREMIA          | ETL | -----LD--V              | ---NAAQM-AP-EFNYILR    | --DCCLVLVLS     | K         | QNV    | 2098 |      |
| AEDES           | QVI | -----VD--ECI            | ---AP-QLNFFVT          | --DLIALIL       | -E        | GDQ    | 2182 |      |
| MIDGE           | SVI | -----AD--KCC            | ---GL-KMFFIT           | --DLVFMLL       | -S        | WSP    | 2129 |      |
| BOMBUS          | HAT | -----IS--YLK            | ---RN-QLMFFIV          | --DVIEMLI       | -D        | QTS    | 2039 |      |
| ANT             | KTV | -----FK--YLO            | ---RH-NMFFIT           | --DIEILM        | -D        | YDV    | 2073 |      |
| WHIPWORM        | QLV | -----LN--DQL            | ---AEAGLNFYFR          | --DLLLILL       | -Q        | IAE    | 2107 |      |
| TRICHINELLA     | KLI | -----VM--DEF            | ---GSNILNFYFRV         | --DLNVLF        | -E        | TAH    | 2124 |      |
| BEEBLE          | KFI | -----VD--RSA            | ---GE-VMNFVA           | --DVVAVL        | -T        | CTE    | 2042 |      |
| BARNACLE        | RLI | -----AA--ERL            | ---GP-EVNALLL          | --DVLMLA        | -G        | AAQ    | 2064 |      |
| THRIP           | DCV | -----LR--ICL            | ---QN-GISYLLG          | --DLVMLA        | -K        | NAE    | 2077 |      |
| FLEA            | ELL | -----VD--ECA            | ---GS-TINHFVA          | --DTVALML       | -S        | HDV    | 2082 |      |
| WHITEFLY        | EAI | -----AA--KCF            | ---GS-EINHFVA          | --DLVLMML       | -S        | WKI    | 2137 |      |
| TICK            | NVL | -----AG--DKL            | ---GS-ELDAFVI          | --DVAVTVL       | -M        | ASD    | 2105 |      |
| TERMITE         | KAI | -----TD--GVV            | ---GR-APNLLS           | --DTVAMLA       | -L        | D      | 2150 |      |
| DAPHNIA         | VAL | -----LR--KI             | ---G-GE-PLNLFVR        | --EALDML        | -E        | SNE    | 1994 |      |
| OSTREOCOCCLUS   | ELV | -----S--KES             | ---G-VD-NVSPRETTD      | --VAVL          | -E        | CNDLSK | 2110 |      |
| STENTOR         | TVM | -----S--GNN             | ---G-GT-GLNFYFR        | --DCHLFL        | -D        | DMI    | 1906 |      |
| KLEBSORMIDIUM   | EIF | -----TA--DPSRS          | ---G-GK-SMFFLR         | --DVCVFFL       | -Q        | DLA    | 2307 |      |
| CLUBMOSS        | NVI | -----LH--DPPPT          | ---G-GF-SPHYVLR        | --DISIIL        | -Q        | DVK    | 2071 |      |
| MOSS            | QTI | -----LI--DPRKS          | ---G-GL-KPHYMLR        | --DICVHIL       | -Q        | NVA    | 2192 |      |
| LIVERWORT       | QTI | -----LI--DPEKS          | ---G-GM-APHYMLR        | --DICVHIL       | -Q        | NLP    | 2219 |      |
| LIGNANO         | QFA | -----LS--DRN            | ---G-GQ-GPHYLLV        | --DIVYFV        | -A        | NSGT   | 2304 |      |
| COPEPOD         | ECI | -----VD--GTL            | ---SPEG-KLNYLL         | --DLLMML        | -Y        | SEK    | 2089 |      |
| GLOBOSUM        | QLV | -----QD--ADL            | ---F-GS-GINFFVQ        | --DLCLLLM       | -E        | TKN    | 2050 |      |
| PALUSTRIS       | ELI | -----TV--HTQ            | ---F-SK-GVNFVQ         | --DLCLLL        | -K        | GGR    | 2104 |      |
| NEOCALLIMASTIX  | KFI | -----SS--GEN            | ---F-ND-GFYFIE         | --DICLLI        | -K        | KNF    | 2185 |      |
| GLOMUS          | KLI | -----IE--GRS            | ---Y-GE-GINFFIQ        | --DLCAIVT       | -V        | GSF    | 2246 |      |
| LOBOSPOR        | KLA | -----IE--GEQ            | ---Y-GE-AMNFVQ         | --DLCVLIV       | -V        | SGS    | 2174 |      |
| SYNCEPHALASTRUM | RLV | -----TQ--GAK            | ---Y-GD-PMNFVQ         | --DLCYLIL       | -A        | GKN    | 2158 |      |
| FUNCTIVORUM     | QAL | -----HST--              | ---G-K-TMCMR           | --DICLLI        | -E        | MVK    | 2143 |      |
| HALBUM          | EYV | -----IS--NOT            | ---G-GQ-GHYFIR         | --DIAMLLI       | -S        | PNI    | 2272 |      |
| DPURPUREUM      | DYI | -----VS--ENN            | ---G-GQ-GLNFYFR        | --DVCFILL       | -K        | PNI    | 2274 |      |
| PVIOLACEUM      | DYV | -----VS--KNT            | ---G-GS-GPHYFIR        | --DVCLILL       | -S        | PNI    | 2267 |      |
| AMPHIPOD        | QCI | -----TD--GTT            | ---GV-GFNYFLA          | --DLVVLV        | -G        | GVD    | 2179 |      |
| SHRIMP          | TCL | -----VD--GTI            | ---GD-KINFFFC          | --DVMVMV        | -G        | GSK    | 2171 |      |
| MUDCRAB         | TCL | -----VD--GTT            | ---GD-RINFFFS          | --DLVVMV        | -G        | GKR    | 2166 |      |
| TARDIGRADE      | DLI | -----ME--IDC            | ---TE-GMNFVAV          | --DLIHLL        | -K        | SVK    | 2245 |      |
| HYDRA           | ELL | -----LS--QRT            | ---L-GD-YNFFV          | --GLIETML       | -S        | WSP    | 2107 |      |
| SALPINGOECA     | LLI | -----LKPDDEPE           | ---TP-GFNFVT           | --DLCLLL        | -T        | ADT    | 2197 |      |
| SPIDER          | NLI | -----VI--GTA            | ---GF-SLNFYFL          | --DVIHITL       | -S        | ASV    | 2183 |      |
| LIMULUS         | QLV | -----VS--GTL            | ---GQ-EINFFIL          | --DVLVLLM       | -T        | ATV    | 2186 |      |
| SCORPION        | NLI | -----LN--ATP            | ---GR-EINFFIL          | --DMLVLL        | -S        | SSI    | 2169 |      |
| ROTIFER         | GFL | -----VNSSLCRD           | ---LA-QMCFIL           | --DMVLL         | -S        | SSI    | 2180 |      |
| CIONA           | QLI | -----LR--EDC            | ---G-VN-GIDFNC         | --DLIVTVL       | -S        | NNI    | 2196 |      |
| OCTOPUS         | EFI | -----IL--GNF            | ---E-EK-GINFFVL        | --DIIVMIL       | -S        | GHE    | 2143 |      |
| CAPITELLA       | ALA | -----TN--               | ---MG-GLNFYFL          | --DIIVLL        | -S        | HEI    | 2194 |      |
| LIMPET          | QLI | -----FS--GPL            | ---S-SD-GINFFV         | --DLIVMM        | -S        | HHT    | 2176 |      |
| SCALLOP         | QLI | -----LS--GAL            | ---G-SQ-GINFFV         | --DVVMM         | -S        | HKM    | 2228 |      |
| LINGULA         | QLM | -----VR--D-M            | ---P-DE-GLNFYV         | --DMVTVL        | -S        | SSV    | 2196 |      |
| OYSTER          | QLI | -----IS--GLF            | ---T-GLNFYVI           | --DVIVTIM       | -S        | HQV    | 2194 |      |
| SNAIL           | QLI | -----LS--TSL            | ---C-DN-GINFFIM        | --DLLVIML       | -S        | HST    | 2197 |      |
| SPONGE          | QFI | -----LSGDSTAGMGGAVGGGEN | ---GLDFYV              | --DAIATML       | -S        | SST    | 2226 |      |
| PRIAPULA        | HLV | -----VN--GNC            | ---GVAA-AIHFLA         | --DVVVML        | -S        | TPV    | 2221 |      |
| DANTO           | QLV | -----VS--SSN            | ---G-GE-GIFMVV         | --DIVTVL        | -S        | ASV    | 2207 |      |
| ESHARK          | QLV | -----VS--GNN            | ---G-GD-GIFMVV         | --DIVTVL        | -S        | TSV    | 2208 |      |
| BHARK           | QLV | -----VS--GNN            | ---G-GD-GIFMVV         | --DIVTVL        | -S        | ISV    | 2206 |      |
| XENOPUS         | QLI | -----VS--GNN            | ---G-GT-GIFMVV         | --EIVHIL        | -S        | SSI    | 2219 |      |
| STERLET         | QLV | -----VS--GNN            | ---G-GE-GIFMVV         | --EIVTVL        | -S        | TSL    | 2222 |      |
| GAR             | QLV | -----VS--GNN            | ---G-GE-GIFMVV         | --EIVTVL        | -S        | ASV    | 2211 |      |
| HUMAN           | QLA | -----AS--ENN            | ---G-GE-GIFMVV         | --EIVATIL       | -S        | TGL    | 2199 |      |
| PLATYPUS        | QLV | -----VS--GEN            | ---G-GE-GIFMVV         | --EIVATIL       | -S        | TSI    | 2203 |      |
| TASDEVIL        | QLV | -----VS--ENN            | ---G-GE-GIFMVV         | --EIVVVV        | -S        | TSI    | 2205 |      |
| COELACANTH      | QLV | -----VS--GNN            | ---G-GE-GIFMVV         | --DIVTVL        | -S        | ANI    | 2210 |      |
| CAECILIAN       | QLV | -----VS--GNN            | ---G-GD-GIFMVV         | --EIVTVL        | -S        | ANV    | 2212 |      |
| CANARY          | QLV | -----VS--GNN            | ---G-GE-GIFMVV         | --EIVHIL        | -S        | TSV    | 2201 |      |
| OSTRICH         | QLV | -----VS--GNN            | ---G-GE-GIFMVV         | --EIVHIL        | -S        | TSV    | 2171 |      |
| GECKO           | QLI | -----VS--GDN            | ---G-GE-GIFMVV         | --EIVHIL        | -S        | TSI    | 2210 |      |
| TURTLE          | QLV | -----VS--RDN            | ---G-GE-GIFMVV         | --EIVHIL        | -S        | TSV    | 2210 |      |
| ALLIGATOR       | QLV | -----VS--RDN            | ---G-GE-GIFMVV         | --EIVHIL        | -S        | TSV    | 2168 |      |
| APLYSIA         | QLL | -----FS--PEV            | ---S-GS-GVNFVAV        | --DLIVTMV       | -S        | HTV    | 2231 |      |
| TRICHOPLAX      | QLI | -----VE--GK             | ---E-SD-GINFFIV        | --DLMIILL       | -S        | ADV    | 2190 |      |
| SOFTCORAL       | ELI | -----LL--PTF            | ---K-NS-ELNFYVI        | --DIVVIML       | -S        | SSV    | 2208 |      |
| STONYCORAL      | ELI | -----LQIKDTEPA          | ---G-TE-GINFFIV        | --DLVVILL       | -S        | STT    | 2234 |      |
| SEA ANEMONE     | ELI | -----LKLIEEAGE          | ---N-KR-GLNFYV         | --DLLVHIL       | -S        | HAT    | 2196 |      |
| SEAUCUE         | QLI | -----IG--GEI            | ---S-SP-GIFMYLL        | --DIMVFL        | -G        | SEK    | 2211 |      |
| LANCELET        | EMI | -----VR--GEA            | ---S-GE-GINFFIV        | --DLLVIML       | -S        | GPV    | 2233 |      |
| STARFISH        | QLL | -----IS--GNT            | ---G-GE-GIFMVV         | --DVVVVLL       | -G        | VTV    | 2250 |      |
| SEA_URCHIN      | QFL | -----AG--GOQ            | ---G--G--GINMYV        | --DIMLVML       | -D        | STL    | 2234 |      |

Supplementary Figure 6 CLUSTAL OMEGA ALL PHYLA, EXPANDED

|                 |                                                             |      |
|-----------------|-------------------------------------------------------------|------|
| PARAMECIUM      | LEVRO-----EYLQMHPOSRNKIC-SVIV-NNLIIML-----SADKN-RKIFDQIET   | 2103 |
| TETRAHYMENA     | KPNLV-----TRR-IASDKKQNLK-QVI-NKICRV-----LAHKE-KEIFKONIQI    | 2228 |
| STYLNONCHIA     | PEDNT-----KNR-----LLCTNVV-NLILKY-----SADKT-KMIFNTNIEI       | 2214 |
| APHANOMYCEsa    | --DTI-----SD-----DLSRFV-NHLMV-----SPHPS--FILLRDLNLYL        | 2028 |
| APHANOMYCEsa    | --ETI-----DY-----DLSQFV-KHLIAV-----SPNTS-AAILRDLNLYL        | 1971 |
| PYTHIUM         | SVGSC-----SM-----MASRFV-NHLINL-----SPNEES-FIMRDLNIRA        | 2160 |
| PLASMOPARA      | VVSSL-----DT-----TTSRFV-NLIVKL-----CPDRN-ILVRSNVLL          | 2146 |
| BREMIA          | AVTFP-----ID-----TASQFV-NELIHL-----CPNRN-KLVQNNVLL          | 2132 |
| AEDES           | SYQPA-----SV-----DEI-SLASGLV-KFVMRN-----CYHAR-REVFRLNLEL    | 2220 |
| MIDGE           | VYKPT-----TM-----SEK-EDACFIM-KFLMEN-----AYNER--BEIFRLNLEL   | 2167 |
| BOMBUS          | SQRLL-----ES-TP-GQNK-DEIQQLM-ETLQKRVIVTKTEKIS--KSIYHYMMNM   | 2085 |
| ANT             | AVPSS-----E-----DGK-ARARQLF-EVLNKMVLMKSD--N-HRVDKMLGL       | 2112 |
| WHIPWORM        | GACQP-----SK-----PSSK-ALCGRLL-EYTIKY-----SGSKN-VHVQRNLIQI   | 2146 |
| TRICHIANELLA    | LKEDE-----AI-----P-K-DSLNDLL-KFCVKH-----CWSKS-KVFRKRLRI     | 2161 |
| BEEBLE          | VTLET-----Q-----TEI-QLASKLV-AFLINN-----LKNDR-KDIFKYHLQI     | 2079 |
| BARNACLE        | DITPE-----E-----SSR-ADAGRLL-EVVLRL-----TPSAH-RGVRIMLDV      | 2101 |
| THRIP           | HQTV-----V-----VLNK-SQLNLF-GYLVKH-----CPHSD-KAVLYRHELE      | 2113 |
| FLA             | AIPSS-----TS-----IQR-NIASQFM-YFLMKN-----AYHER-RAIYKLMMEI    | 2120 |
| WHITEFLY        | AVPDG-----KK-----DENR-TVSELL-SFLMAN-----TESFN-KRVFRNLEI     | 2176 |
| TICK            | WSLED-----RK-TV-----GND-RDQGFV-ELLAQR-----CGHER-REVLKNNLEL  | 2145 |
| TERMITE         | WCRKT-----TS-LPAKSDH-HLVSQL-LYLLISK-----VHHDR-RDVFKNLEL     | 2192 |
| DAPHNIA         | APPSA-----NDV-----EFA-QAASSLL-QFILRN-----IENKN-AEILRDIEM    | 2033 |
| OSTREOCOCCUS    | FDEAK-----E-----PCLLDAL-EIVLKC-----GHSKY-VGVMAKMLAL         | 2143 |
| STENTOR         | SLEAK-----E-----KBAKGLF-NLIVKV-----GGDLN-KEIFKSNIKI         | 1940 |
| KLEBSORIDIUM    | KFPNP-----K-----SKATDL-GHLMRV-----SAHPT-RVLYRIMLDV          | 2340 |
| CLUBMOSS        | EPTDR-----V-----HTASRP-DHLMV-----AAHES-ROVLRANVEI           | 2104 |
| MOSS            | SAPDG-----V-----RLATNFV-HHLISV-----ADHGS-ROVLRANIDI         | 2225 |
| LIVERWORT       | CPPDP-----V-----GMASEPI-THLMRV-----AAHPS-SPVLRANVDI         | 2252 |
| LIGNANO         | AIPED-----DL-----GDR-DLVERLL-DKLTGL-----CYDKE-RRIFKNNWRL    | 2342 |
| COPEPOD         | TGTV-----V-----TON-LVVSRLM-TLIMKN-----VYHEE-KRIFKANTEM      | 2125 |
| GLOBOSUM        | AHAVTK-----AD-----DSV-TI-LKTM-RWLIRH-----CNHES-KATIRNHLRI   | 2088 |
| PALUSTRIS       | TNGEETKQSLGLDDH-----DTR-TILFKMMESLVASV-----CVADS-MPEVRENELE | 2152 |
| NEOCALLIMASTIX  | VKIEN-----NS-----ENR-FNFNMNM-NYILKY-----SNIQD-LLSIRVVIDI    | 2223 |
| GLONUS          | ITLE-----SY-----QDK-VLIYELM-EFLMKN-----SYNES-RIVIRNMLI      | 2283 |
| LOBOSPOR        | VKLED-----SY-----DDR-VLLLSFL-SYLMKN-----CYHEQ-ROYLLNMLD     | 2212 |
| SYNCEPHALASTRUM | VKLED-----SY-----EDK-TLLFYFT-NYLMEN-----AYHET-ARLAKNMQE     | 2196 |
| FUNCTIVORUM     | LDPKD-----S-----FQANLL-NHLER-----CGYPD-KRIFKSNIKI           | 2177 |
| HALBUM          | YDQK-----LD-QLDTLSK-SNISKPI-NFLIQN-----SYCAD-ROILRNHLNI     | 2314 |
| DURPUREUM       | YKLE-----GEIRPPTSLE-NHLSKPM-NFLMKN-----TYPCD-RRLIKSNLNI     | 2317 |
| PVIOLACEUM      | YSVSD-----K-LPVAFSTK-QLISKPI-NYLFKN-----CYCSD-RRLIKSNLNI    | 2309 |
| AMPHIPOD        | GAPND-----PD-----D-S-PLLAKLM-CHLITS-----LPHLR-ADVFRYNDV     | 2216 |
| SHRIMP          | AVPQD-----TV-----MGR-NIVGRVL-RYLCMN-----TPQTR-ADIFKYNLDV    | 2209 |
| MUDCRAB         | AGSQD-----ST-----MGR-NMVSRLV-RFLCSN-----TPHNR-ADVFRYNIDA    | 2204 |
| TARDIGRADE      | TPLPG-----GQD-FRAQRFV-LFLIQH-----VKHSN-ROVORNLT             | 2281 |
| HYDRA           | SIPEN-----TA-----SGS-ILASSLL-DYLVKN-----SHNLD-SPVLTQNLNLYL  | 2145 |
| SALPINGOBECA    | AVPQD-----DS-----EK-RLARQLV-QFLMEN-----ARHET-TAVFKNNVNI     | 2233 |
| SPIDER          | AIPQD-----ND-----ML--KASEVL-KFVMNM-----IEHSR-RDIFRNNLEL     | 2219 |
| LIMULUS         | AIPED-----TV-----IGR-HAANSLL-EFLMTK-----CAHPR-KDIFRNNLEL    | 2224 |
| SCORPION        | AIPED-----SS-----IGR-HAANSLL-EFLMTK-----CFHPR-KDIFRNNLEL    | 2207 |
| ROTIFFER        | AVPQD-----S-----EA-KLINRFL-TLLKLR-----CYHER-RAVFRNNLEL      | 2216 |
| CIONA           | AVPQD-----SV-----EGK-SLVGRLL-EQLERR-----IHHNN-RAIRHNLDI     | 2234 |
| OCTOPOUS        | SIPGD-----TS-----KDR-YVASSLV-QFILRN-----LYNAN-RTIFRNNKL     | 2181 |
| CAPITELLA       | AIPEE-----TT-----VDI-AMTSHLV-KYIVON-----CYHON-ROIMRNNLEL    | 2232 |
| LIMPET          | SIPQD-----TA-----EER-AMSSRLV-QFLMAN-----IYHKN-KOIRNNLEL     | 2214 |
| SCALLOP         | AIPQD-----TA-----EER-AMATRVV-DYLMAN-----VFSET-RPVFRNNLEL    | 2266 |
| LINGULA         | AVPQD-----TA-----MDR-AMASRLV-EFVVRN-----VNHDY-ROIFRNNLEL    | 2234 |
| OYSTER          | AIPQD-----TV-----EDR-AMSSRLV-EFVMGY-----VYNDY-RPVFRNNLEL    | 2232 |
| SNAIL           | AVPQN-----SS-----TER-AMASRLV-EFLVVR-----VHHEE-RAIFRNNLEL    | 2235 |
| SPONGE          | AIIED-----RF-----LGSQLL-EYIMLR-----SNHKN-RSILRNNLEI         | 2260 |
| PRIAPULA        | ARPQD-----NM-----TER-SLASRLL-EFLMKN-----ARHAT-MSVFRNNLEI    | 2259 |
| DANTO           | ASPKG-----NT-----RDE-ILANRLL-GFLFKN-----CFHSK-RAVFRNNLEI    | 2245 |
| ESHARK          | ATPKG-----NM-----KDE-ILANRLL-EFLMKN-----AFHEK-RAVFRNNLEI    | 2246 |
| BHARK           | ATPKG-----DL-----KNE-ILANRLL-EFLMKN-----CFHEK-RVFRNNLEI     | 2244 |
| XENOPUS         | ATPNG-----QA-----KEE-ILANRLL-EFLMKN-----VFHEK-RAVFRNNLEI    | 2257 |
| STERLET         | ASPKG-----NT-----RDE-ILANRLL-EFLMKN-----AFYDK-RAVFRNNLEI    | 2260 |
| GAR             | ATPKG-----DT-----KDE-VLANRLL-EFLMKN-----AFHEK-RAVFRNNLEI    | 2249 |
| HUMAN           | ATPTG-----VP-----KDE-VLANRLL-NFLMKH-----VFHPK-RAVFRNNLEI    | 2237 |
| PLATYPUS        | ATPTG-----VT-----KDE-VLANRLL-EFLMKH-----VFHPK-RAVFRNNLEI    | 2241 |
| TASDEVIL        | ATPKG-----VP-----KDE-VLANRLL-QFLMKH-----VFHPK-RAVFRNNLEI    | 2243 |
| COELACANTH      | AAPKG-----NT-----RDE-ILANRLL-EFLMKN-----TYHEK-RAVFRNNLEI    | 2248 |
| CAECILIAN       | ATPAG-----LA-----KDE-ILANRLL-EFLVTH-----SFHEK-RAVFRNNLEI    | 2250 |
| CANARY          | ATPKG-----NI-----KDE-ILANRLL-EFLMKN-----AFHPK-RAVFRNNLEI    | 2239 |
| OSTRICH         | ATPKG-----NI-----KDE-ILANRLL-EFLMKN-----AFHPK-RAVFRNNLEI    | 2209 |
| GECKO           | ATPKE-----NI-----KDE-ILANRLL-EFLMKN-----AFHPK-RAVFRNNLEI    | 2248 |
| TURTLE          | ATPKG-----NI-----KDE-ILANRLL-EFLMKN-----VFHPK-RAVFRNNLEI    | 2248 |
| ALLIGATOR       | ASPKG-----NV-----KDE-ILANRLL-EFLMKN-----TFHPK-RAVFRNNLEI    | 2206 |
| APLYSIA         | AIPED-----SA-----EGR-AMASRVV-SFLIAN-----VFHTN-ROVFRNNLEL    | 2269 |
| TRICHOPLAX      | AIPKD-----VD-----EI-LQANRLM-EFLMKN-----AFYFN-RSVLRNNLEI     | 2227 |
| SOFTCORAL       | TIPED-----SY-----SSR-RLTSRLL-EYLMET-----CNHPT-RSIFKNNLEL    | 2246 |
| STONYCORAL      | AIPED-----SH-----NDR-HLASRLL-GFLMSR-----TRHRH-RSLFRNNLEI    | 2272 |
| SEA ANEMONE     | AIPED-----SY-----GDR-HLASRLL-QTVMRR-----THHEN-RAVFRNNLEI    | 2234 |
| SEACUKE         | AIPED-----KY-----LASQLL-RFLMLN-----VHHAK-RAILRNNLEL         | 2245 |
| LANCELET        | AIPED-----SA-----MGR-ALTSRLL-HFLMAN-----AFHKT-RAVFRNNLEL    | 2271 |
| STARFISH        | AIPED-----KR-----LANRL-EFLMHF-----CHHSN-ROVLRNNLEL          | 2284 |
| SEA_URCHIN      | AVPED-----NR-----LASGVL-RFLMKN-----SYHER-RSVMRNNLEL         | 2268 |

Supplementary Figure 6 CLUSTAL OMEGA ALL PHYLA, EXPANDED

|                 |                                                             |      |
|-----------------|-------------------------------------------------------------|------|
| PARAMECIUM      | IIMFVQLRDSM-Y--ICDKIIVD-MISKKPDQKIQQ-----LDP-QAEDTSVLWQANGL | 2153 |
| TETRAHYMENA     | LKNIILDLKKECI-Y--VDENLTKP-MLLLED-----K-EDKEKSQLWNLNSI       | 2270 |
| STYLONCCHIA     | IAGLHRKRLV-A--INKDVISM-MIGMDD-----KKPESNLWKMTGI             | 2254 |
| APHANOMYCEsa    | IIFAVTKPTQC-RF-LNLDLILL-MIN-A-----DDA---ENASRHVAGM          | 2067 |
| APHANOMYCEse    | IISFLFRPQSC-RF-LNGDAIMD-MIG-G-----DGNDD--KLDTRHVAGM         | 2012 |
| PYTHIUM         | VSELIALLKDDV-RI-DRDEVKLL-LFSSE-----DNNP--KREAADRYTAL        | 2202 |
| PLASMOPARA      | VSELIALLKDDV-YI-NVRELIIF-MMS-G-----DEDT--KIKYARKFVAL        | 2187 |
| BREMIA          | VKRLIALLKNI-LYI-DARELIH-IIS-E-----DGTI--KLNNAKQPAAL         | 2173 |
| AEDDES          | VKRLIEQKRAVI-SV--PVQLLYD-MIG-P-----TQDPESMQ-----NIGGL       | 2258 |
| MIDGE           | IKKLVETVKEIL-VVKIPSQLLD-LLOKP-----LEEEMNLN-----LRCGI        | 2208 |
| BOMBUS          | VKVVLEVHPYL-KL--PKNLD--KMSFA-----PGATVY-----                | 2116 |
| ANT             | IKMVEKRRYL-RV--PSDFLQ-KIISA-----DTTVMY-----                 | 2144 |
| WHIPWORM        | VSPMGLIKDVI-AV--DFKILLD-HCVA-----D-TDGE-----NAFGV           | 2182 |
| TRICHOINELLA    | IEMVLVMSFV-TL--DPSLILE-KICFP-----LGNENE-----NVCGI           | 2198 |
| BEEFLE          | IRLLVEAKTSI-EV--PYDLIYA-KIKVE-----PTCKA-----VEIGI           | 2115 |
| BARNACLE        | LEKLVSGHIDRA-AF--PGRLAVQ-LITGD-----RQLHA-----PRAGV          | 2137 |
| THRIP           | IKMVEVKNYI-DP--PHDILLS-MLDNP-----D-----ARVGI                | 2145 |
| FLA             | IKSVVEIKTCL-DF--PLQYLIL-ALENP-----VKDSK-----TNMGI           | 2156 |
| WHITEFLY        | VKVVVEVKSLL-DI--PYQLLLD-LLKPE-----DNDPKSEK-----AQGTI        | 2215 |
| TICK            | IRAWVETVRELR-RF--PADVVLE-OLEQC-----SLDSK-----DHHAV          | 2181 |
| TERMITE         | IRVVVELKPNF-DI--PVQLLYD-MIMKH-----DRKDPT-V-----SEPGI        | 2230 |
| DAPHNIA         | VRAIFLVNKRISLN--IPYELVEE-LIS-----PDKSK-----RKLGL            | 2068 |
| OSTREOCOCCUS    | IIRMFARLKDVAISIGTPPACFQNAFHRANELL--ELVP-KSKSQEEKRFVTQKKLFVM | 2200 |
| STENTOR         | IIEELAKNRPYL-E---HRLDLC-MKKQ-----LKDLD--NKISYIKWLFGI        | 1981 |
| KLEBSORMIDIUM   | IKFLAKNSDF-S--VDRKRLR-YLAD-----GSDA-----KVKFAGI             | 2378 |
| CLUBMOSS        | IKAFIQLKDRV-N--IDGRLILK-YLAG-----GKSTNTSDRQLIQKSVGL         | 2149 |
| MOSS            | IRLFLENKSTI-S--LERGQLQ-YLISG-----GRNPDMDNRIMKRLVGL          | 2270 |
| LIVERWORT       | IIRMFIDTKKVL-Q--FDKNIILE-KLAFG-----GKGASGTDRSVRMQRALGL      | 2297 |
| LIGNANO         | LDALIRSRSRVHC--VPYKRFD-LIQ-----QTEE-YTA-----AAAGL           | 2379 |
| COPEPOD         | IRLVIEKVKDCD-VVSANFSVID-LLE-----ANQGDLS--HFGAL              | 2163 |
| GLOBOSUM        | VRLLIENKDFM-I--VPSDVIFE-LIH-----AKPDGNNK-AEKYLNLTGV         | 2130 |
| PALUSTRIS       | IASFIEIPLSIL-V--APTRIIYE-YIT-----NOKREN-----LLAGI           | 2187 |
| NEOCALLIMASTIX  | IIEFLNKIKDFI-D--TPVELIYK-FLS-----NKNNSDQV-YSVSVINLAI        | 2265 |
| GLOMUS          | IKAIFELIKELI-V--VPTHVHE-LFS-----DSVGNVDR-----VYTGL          | 2320 |
| LOBOSPOR        | IKQFENRNMIA-I--VPTTIIYN-NFK-----NIKDDK-R-----NITGI          | 2248 |
| SYNCEPHALASTRUM | VKNALENKDRR-I--PPTKIMYN-QFN-----PRDKNAGQ-----IRVGL          | 2233 |
| FUNCTIVORUM     | VKMEQKDFY-I--PSKVCILA-TLSYGLTVVQQRIVEMLDADANTHT--KITAL      | 2227 |
| HALBUM          | LKLFVERKGLF-S--VEKKIIVE-ALATPV-----TNFKSKAROV-----RSTAL     | 2356 |
| DUPURPUREUM     | VKSFERNRSLF-H--INKNIIE-LLL-QK-----GDFKSKSRQM-----KTTGL      | 2358 |
| PVIOLACEUM      | IKQFERNKGLF-T--IDQSIIVE-YLV-QK-----GDYKSKSRQI-----KTTGL     | 2350 |
| AMPHIPOD        | LRSLVSNWASPT--VDGSATIE-LLE-----TREGHKRE-----VDAGL           | 2254 |
| SHRIMP          | VRSVVECKSLL-T--VPYTIYS-LME-----VKDGAERE-----VEAGL           | 2246 |
| MUDCRAB         | VKSVECKRAVL-T--VPYALIS-LME-----VSDGRNKE-----QEAGL           | 2241 |
| TARDIGRADE      | LKVLIEAKAQL-E--IPPRGIPDLLI-----KDKTKAKL-----NIPVI           | 2319 |
| HYDRA           | INALSSRRDRV-T--CPYKLIYS-LFS-----FSDQNSKK-----NLRGL          | 2182 |
| SALPINGOECA     | IRILLERKDAV-QDKVPFKVIVD-NMS-----SRQMASKO-----NLSGL          | 2273 |
| SPIDER          | VKVLIECKRS-L-K--IPYNIYE-KMS-----DFSPESQK-----NHFGI          | 2255 |
| LIMULUS         | IKVVVECKPRL-E--VPTRIIIG-OMC-----MTDITRKE-----NLVGI          | 2261 |
| SCORPION        | IKVVVECKERL-D--IPYRIIFE-SHR-----NLDKPKVD-----NIVGI          | 2244 |
| ROTIIFER        | IKMVECKRDM-Q--VPVELIN-FLT-----SN--DHRK-----LSTGI            | 2251 |
| CLIONA          | IKVTECKQERV-RGGVDPNHIVQ-LCE-----SNDVDLKE-----NPAFL          | 2273 |
| OCTOPOUS        | ILALVGLKARI-D--IPYKLIYE-MMT-----SSDPNTGG-----LMVSV          | 2218 |
| CAPITELLA       | LKVLVEAKSTI-R--IPYKLIYE-NFI-----DREDKGRK-----NVVGL          | 2269 |
| LIMPET          | LKVLVECKHRI-E--IPYKLIYN-OLK-----SEEN-----KSVGI              | 2247 |
| SCALLOP         | LKVLVECKRDL-E--VPYNIYK-LMV-----ESRSDPKSPR-----HSTGI         | 2305 |
| LINGULA         | LKVLVECKGRF-D--MPTKIIYD-NFS-----DRDPKSKT-----NTAGV          | 2271 |
| OYSTER          | LKVLVECKRDRV-E--IPYNIYK-HLK-----QPDETKKE-----SCVGI          | 2269 |
| SNAIL           | LKVLVECKDCI-E--IPYKLIYN-OLK-----MPDPSSKS-----SLIGI          | 2272 |
| SPONGE          | VRVMVELKDKI-D--IPTRVIYD-QFS-----NSDKSTVS-----NLSGI          | 2297 |
| PRIAPULA        | IKVLVECKRDRV-D--VPSQVIYE-NMC-----AGDITMRD-----NSVGV         | 2296 |
| DANTO           | IRVVVECKRDL-T--IPYDLIYE-RFA-----GTDPNKSK-----NSVGI          | 2282 |
| ESHARK          | IKVVVECKDCL-S--VPYSLIFE-RFS-----STDPNKSK-----NSVGI          | 2283 |
| BSHARK          | IKVVVECKDCL-S--IPYSLIFE-RFA-----GRDPNTKD-----NSVGI          | 2281 |
| XENOPUS         | IKVVVECKECL-S--IPYRIIYE-GFS-----GTDPNTKD-----NSVGI          | 2294 |
| STERLET         | IKVVVECKDCL-A--VPYSLIFE-RFS-----GKDPNSKN-----NSVGI          | 2297 |
| GAR             | IKVVVECKDSL-M--VPYSLIFE-RFA-----GSDPNKSK-----NSVGI          | 2286 |
| HUMAN           | IKVVVECKDCL-S--IPYRLIFE-KFS-----GKDPNSKD-----NSVGI          | 2274 |
| PLATYPUS        | IKVVVECKDCL-S--IPYRLIFE-KFA-----TGDPNTKD-----NSVGI          | 2278 |
| TASDEVIL        | IKVVVECKDCL-S--IPYRIIFE-KFS-----NRDPNSKD-----NSVGI          | 2280 |
| COELACANTH      | IKVVVECKDCL-A--VPYSLIYQ-RFS-----GKDPNTKD-----NTVGI          | 2285 |
| CAECILIAN       | IKVVVECKDCL-S--IPYRLIFE-RFS-----NGNTNSKD-----NSVGI          | 2287 |
| CANARY          | IKVVVECKDCL-S--IPYSLIFE-RFS-----SGDPPTKD-----NSVGI          | 2276 |
| OSTRICH         | IKVVVECKRCL-S--IPYSLIFE-KFS-----GGDPNTKD-----NSVGI          | 2246 |
| GECKO           | IKVVVECKDCL-S--IPYRLIFE-RFS-----GDPNTKD-----NSVGI           | 2285 |
| TURTLE          | IKVVVECKDCL-S--IPYRLIFE-QFS-----GGDPNTKD-----NSVGI          | 2285 |
| ALLIGATOR       | IKVVVECKDCL-T--VPYRLIFE-QFS-----GGDPNTKD-----NSVGI          | 2243 |
| APLYSIA         | LRLLLECKHVRV-D--IPYKLIYQ-LFK-----STDPSKGR-----SSTGV         | 2306 |
| TRICHOPLAX      | IKHAVELKNHI-E--IPYRIIYK-NFS-----NPDKKDKD-----NSTGI          | 2264 |
| SOFTCORAL       | IKHFEVVKERI-D--VPYKLIYE-RFS-----NASVNTKE-----NSVGI          | 2283 |
| STONYCORAL      | VKSVEVKSIL-H--VPAEVIFN-SFS-----DPDPVKKD-----NAVGI           | 2309 |
| SEA ANEMONE     | VKMVEVVRERV-T--VPTKVIYE-ALS-----NPHPKDKD-----NATGI          | 2271 |
| SEACUCU         | VKVLVEKPVV-D--IPTKVIYN-YLS-----NKDPASNT-----NTVGV           | 2282 |
| LANCELET        | IKHAVECKTRV-E--VPTKVIHD-OLC-----GSDASSKA-----NSVGI          | 2308 |
| STARFISH        | IKVLVECKEII-S--VPTKVIYN-ILA-----TPDPVKD-----SSTGL           | 2321 |
| SEA_URCHIN      | IKVLVECKDVI-D--VPTRVIYE-SIQ-----DRSPDKKD-----SAVGI          | 2305 |

Supplementary Figure 6 CLUSTAL OMEGA ALL PHYL, EXPANDED

|                |                                                           |      |
|----------------|-----------------------------------------------------------|------|
| PARAMECIUM     | A-ILHIALNNVVILQDYPEFVRTANSSLYEKYRFLQKQ-----SHNIKFPTEITNR  | 2205 |
| TETRAHYMENA    | L-ILACIQLRIPILSNYEFASRAQTV--EKKFAPFLNIS-----E----KDR-LKR  | 2314 |
| STYLONCHIA     | Q-ILHLAVSFIDLVIEKPNIGQTNNVN--QREFRFOEQNE-----NQ--LGDKIMNS | 2301 |
| APHANOMYCESa   | Q-LAAVNLINLAFDASSPVWFET-----SLR-----ACSSRELTALLAR         | 2105 |
| APHANOMYCESa   | Q-IVMMLLSLAFDATSPATSFEF-----LLR-----NARAKLENNLLTR         | 2050 |
| PYTHIUM        | Q-IVSHMLTAGLVEDILP--DF-----DM-----SDGKTIEDGVLES           | 2236 |
| PLASMOPARA     | Q-IVSAMLVAGLKSLELQA--EV-----ANQTIEDGILLC                  | 2218 |
| BREMIA         | Q-IVSAMLTAGHISKLRV--QV-----SDHTIEDGILLV                   | 2204 |
| AEDES          | Q-LNMVVMANGLVFW--T-----E-TS-KFDFIRAFIRC                   | 2287 |
| MIDGE          | Q-LNMVLLINDIVFW--K-----D-SEQKQFIAAVINC                    | 2238 |
| BOMBUS         | --LILCFINGMLD-----I1QRNDLFFERS                            | 2143 |
| ANT            | --LILVLDIMAEF-----I1VRNDVDFLLKP                           | 2171 |
| WHIPWORM       | Q-LLGVLMKMKKPCCEL-----GDPEKDQRIFFEYLINR                   | 2215 |
| TRICHINELLA    | S-ILGLCLNTVPEFTSFL-----TDPNYESGIFSHLVR                    | 2231 |
| BEEFLE         | H-VSIFLANKLPLW--K-----G--DSKDFCKSIFVI                     | 2144 |
| BARNACLE       | CALRQALLADRPLCL--D-----R--EEMQQLDRLLTL                    | 2167 |
| THRIP          | N-LTMIMLPHKLTPTW--T-----T--KSKQSFISFLKN                   | 2174 |
| FLA            | E-LACILLANKIIPW--P-----D--SKKDDYKALCMQ                    | 2185 |
| WHITEFLY       | M-LACILVVNNIAPY--A-----S--ASKMKYKALVRK                    | 2244 |
| TICK           | L-LFGIFVSNLVEF--G-----QSHASTARILEVLPR                     | 2212 |
| TERMITE        | Q-VAITLANRLEPW--S-----S--TGKLQFLRALRN                     | 2259 |
| DAPHNIA        | L-ILDAIVVHDFLPKNHE-----F---NSRFKQQLVKW                    | 2097 |
| OSTREOCOCCLUS  | Q-LIRGLHEETKIQVDMVEFV-----ITNSRGEQIDG-GRSPLIQAVMSC        | 2246 |
| STEINBOR       | L-THEALDKRIKILSDG-----R-----EYRSEDSDSLLKS                 | 2012 |
| KLBSORMIDIUM   | Q-LFVLLAVGCHKIYDYSI-----ED--AA-IPEPKYGRLEEC               | 2412 |
| CLUBBOSS       | Q-LFVHWSSSGSNVQGL-----ER--LA-VGREDEVETLLSN                | 2183 |
| MOSS           | Q-LLCAIVGSGIPIYDPS-----CD---FS-TSEEHICALLNN               | 2304 |
| LIVERWORT      | Q-LFSAIAASGLPLYPDA-----CD--MF-IE-KDLYQVLLQN               | 2330 |
| LIGNANO        | Q-LYNAYLSNALPYFNEQ-----QGVNVGG-VDSPQLAALVRL               | 2416 |
| COPEPOD        | K-VLVFLGQQM--FDR-----R--LETPGLCQKICQT                     | 2192 |
| GLOBOSUM       | Y-VLVQALVANKVSAYDA-----RGLTDRI-FSESDLDSLSSL               | 2166 |
| PALUSTRIS      | Y-LTLVVVTHGVPPFDM-----RGLGALS-LSEDTCDAPMNL                | 2223 |
| NEOCALLIMASTIX | Q-ILLSFVSNIDPEYNEL-----NMTTSDSYSETDYSVLANY                | 2303 |
| GLOMUS         | Q-LLGVLAHDKPLFQDE-----VGLDLAG-LTSDKFYMDLNN                | 2357 |
| LOBOSPOR       | Q-LLGVLTNDHPPFYRG-----PEIDLGT-LRESDYEALVRN                | 2285 |
| SYMPHYALASTRUM | Q-LVGLLVHGIKPPFYRG-----EGFTLNG-LTEHQYAACGN                | 2270 |
| FUNGIVORUM     | Q-LLGVLANGLFPYHDE-----QD--TF-ISKVIMOLIMSN                 | 2261 |
| HALBUM         | I-QLSLLLNSGYAAYDKE-----ND---SE-ISEPKYQIILLDC              | 2390 |
| DURPUPUREUM    | V-LLSLLLNGFPAYDKD-----YD--SDL-ISEPKYQIILLDH               | 2393 |
| PVIOLACEUM     | V-LLSLLMLCNGIPAFDAS-----NHG-TGG-QSEPKYQIILLDN             | 2386 |
| AMPHIPOD       | H-AAA CLLVAGVSPYNEQ-----DR-MQERKMHGVLKLC                  | 2286 |
| SHRIMP         | Q-LLGVLANGLPPYTV-----SE-TEKKRCSLVIRL                      | 2278 |
| MUDCRAB        | N-LLGVLANGLPYTED-----SV-AEKTCEKILLLKL                     | 2273 |
| TARDIGRADE     | N-ILMILLNAGLPLTAGS-----FEEELKILMLH                        | 2347 |
| HYDRA          | Q-LLGVLANGLPAPATQ-----I--SG-LTEYDYLALSN                   | 2215 |
| SALPINGOECA    | H-LLSLLANDMMPSEDS-----VE--EAG-LSMRSFQILVAN                | 2308 |
| SPIDER         | Q-LLGVVLSCDFPPYDQ-----D-E-AEGYSFLTLLRN                    | 2287 |
| LIMULUS        | Q-LSFVLANGLSPYSDT-----GK-LEKARFLMLASN                     | 2294 |
| SCORPION       | Q-LFELVNSGLDPYQNT-----S-R-IDKISLKTIEN                     | 2276 |
| ROTIFFER       | Q-LFVLSWGLNEMFYP-----MD-ISRLDFKSLINC                      | 2283 |
| CLONA          | Q-LLSAPLVNKSFPFAGE-----Y--TLD-VDRQYQRIFRN                 | 2307 |
| OCTOPUS        | Q-LLGVLLKCNFSPVNM-----TD-VPRETFSHLSQG                     | 2250 |
| CAPITELLA      | Q-IVGVFLANGLSPWQP-----AE-VSKDRYQYLAMN                     | 2301 |
| LIMPET         | Q-LLGVVITCKFPYPYGP-----CP-VDRHFTTVVFL                     | 2279 |
| SCALLOP        | Q-LLGVVLACKFPYPYGP-----AP-VDRDKFSTVSNY                    | 2337 |
| LINGULA        | Q-MVGVFLANKLPAYSYT-----SE-VDREKTYKALASN                   | 2303 |
| OYSTER         | Q-LMGVVLSAKFPYAPT-----AP-VDQEKFTTVAQY                     | 2301 |
| SNAIL          | Q-VLGVIMTCNYAPYGPS-----AG-VDRNRFTTLASS                    | 2304 |
| SPONGE         | Q-LVGVAVANELNPYDTN-----T--AGS-LDQGLYKIFVNN                | 2331 |
| PRIAPULA       | Q-LLGVVVAANLPPYSHT-----TA-VDSEKTFQALVRC                   | 2328 |
| DANTO          | Q-LLGVVVAANLPPYDAA-----CG-IEHDRFQSLANN                    | 2314 |
| ESHARK         | Q-LLGVLANLSPYVFK-----CE-IGYERFORLVYN                      | 2315 |
| BHARK          | Q-LLGVLANLSPYDCK-----CE-IDSERFORLVHN                      | 2313 |
| XENOPUS        | Q-LLGVLANLSPYDCK-----CG-IDPERFQSLANN                      | 2326 |
| STERLET        | Q-LLGVLANLSPYDCK-----CG-IDSESFQALATN                      | 2329 |
| GAR            | Q-LLGVLANLSPYDPS-----CG-IEHERYFKSLANN                     | 2318 |
| HUMAN          | Q-LLGVMANDLPPYDPQ-----CG-IQSSYFQALVNN                     | 2306 |
| PLATYPUS       | Q-LLGVLANLSPYDCK-----CG-IDSARYFQALANN                     | 2310 |
| TASDEVIL       | Q-LLGVIMANLPPYDSK-----SG-IESTRYFQALVNN                    | 2312 |
| COELACANTH     | Q-LLGVLANLSPHDP-----CS-IMESTYKALANN                       | 2317 |
| CAECILIAN      | Q-LLGVLANLSPYDCK-----CG-IDVERFQALANN                      | 2319 |
| CANARY         | Q-LLGVLANLSPYDCK-----CE-IDVRVFQALASN                      | 2308 |
| OSTRICH        | Q-LLGVLANLSPYDCK-----CE-IDVRVFQALASN                      | 2278 |
| GECKO          | Q-LLGVLANLSPYDCK-----CE-IDVRVFQALANN                      | 2317 |
| TURTLE         | Q-LLGVLANLSPYDCK-----CE-IDSVRFQDLANN                      | 2317 |
| ALLIGATOR      | Q-LLGVLANLSPYDCK-----CE-IDSTRYFQALVNN                     | 2275 |
| APLYSIA        | Q-VLGVVLSADFPYVPS-----AP-VDKDKLSSSLNL                     | 2338 |
| TRICHOPLAX     | Q-CLGVVANGLSPYRYD-----VE-VDE--MLALAN                      | 2293 |
| SOFTCORAL      | Q-LMGVIVANKITPFPKG-----CG-VDEKRYQDLVKN                    | 2315 |
| TONYCORAL      | Q-LLGVVANGLFPVYSD-----ST-IDEDRYGTLVNN                     | 2341 |
| SEA_ANEMONIE   | Q-LLGVVLANKIHPPSSD-----SS-VDENTYATALSDN                   | 2303 |
| SEAUCUKE       | Q-LLGVVLANKIHPPSST-----SD-VDSEYFQALATN                    | 2314 |
| LANCELET       | Q-LLGVLANQLPPNPS-----T--SGN-IDREQFSAVAKN                  | 2342 |
| STARFISH       | Q-LLGVLANGLHPIDKA-----SD-IDEERYAALSNN                     | 2353 |
| SEA_URCHIN     | H-LLSLLANLHPLSPT-----CD-VDADRYSALASN                      | 2337 |

Supplementary Figure 6 CLUSTAL OMEGA ALL PHYLA, EXPANDED

|                 |                                                            |      |
|-----------------|------------------------------------------------------------|------|
| PARAMECIUM      | ---LAC---TYTTKKKHLKGFENNVYKVLQCCQ-----YL-----KVSQNDYEQ     | 2243 |
| TETRAHYMENA     | ---LLLPQOHSKRQYCKMASAVCCGLSLMMHEYG---GQF-----EGKRRKIYEQ    | 2357 |
| STYLOENCHIA     | ---LLKLLSKKKKQLIQMASFTLGRILNKOPS-----                      | 2330 |
| APHANOMYCEsa    | LASTT---HKTTP---OLAADVSLVLOHMPAS-----T                     | 2133 |
| APHANOMYCESe    | MVS-M---HKTTP---ILAADLADGLVLKMHMS-----T                    | 2076 |
| PYTHIUM         | ---LY---HKRASLVTAAEISGLLLKAKTGSK-----AQ                    | 2265 |
| PLASMOPARA      | ---MT---TKVTSLVTAAGVGGLYLLTMDQAT-----SK                    | 2247 |
| BREMIA          | ---MT---SKTTPLVTAAGVGGLYLLQTRTQID-----TD                   | 2233 |
| AEDES           | ---L---DSEKAAVIRPASELTMCLNNLYPGGE-EQE-----D---E-RY         | 2322 |
| MIDGE           | ---F---RHNSQITRADAALMCLHQIVGDCCQ-MVE-----G---DENF          | 2274 |
| BOMBUS          | ---LKKWOD---EETHLQCCYGLLLKSLNDMT---LA-----NKRK             | 2179 |
| ANT             | ---LSVWDTSKADELPLQCCSLTLLRSLDNTTH---HE-----TERENKKY        | 2213 |
| WHIPWORM        | ---L---SSKHAHVKGAVYCHLLSALSVM-----GG                       | 2243 |
| TRICHINELLA     | ---L---SLKNVLLKLAAPVCHLLKVLNELQ-----TDCE                   | 2262 |
| BEEBLE          | ---L---KAKYKTVRBCAELLGLILRETSH-----DLP                     | 2172 |
| BARNACLE        | ---M---VDRSSTAELRPASTVWALL---CA-GR-----TDIE                | 2196 |
| THRIP           | ---L---NNNTKEVYKASAEITGMCLNQMCLNDGLLS-----I---EDQ          | 2210 |
| FLEA            | ---F---NSMESITVRKCSAEVIGMVLNLSL-G-----SAEN                 | 2215 |
| WHITEFLY        | ---M---HSQKTTVEETPAVIGRILLFLQOEGSDYQL-----T---NDGS         | 2281 |
| TICK            | ---L---ASRYGAVTSVADVGLLIRKMSAEGT---A-----EDS               | 2245 |
| TERMITE         | ---I---DTEKRSITQSSAFVAGMALLELAANGSGMLE-----G---DDA         | 2295 |
| DAPHNIA         | ---LT---LDEKRDITRSCALCGSILIRETDHE-----                     | 2125 |
| OSTREOCOCCLUS   | ---LMSSTESTGGLLNSPASALLKIMEIDGNHP-----R                    | 2278 |
| STENTOR         | ---LE---VPRRQLIIEASLEIKRELYSBNQ-----T                      | 2040 |
| KLEBSORMIDIUM   | ---LG---FKAKEVIRPAAELIIRALFERPKT-----PDRDQS                | 2444 |
| CLUBMOSS        | ---LK---LKAKEVIRASAVLQVLRDKSED-----TDL                     | 2213 |
| MOSS            | ---LN---VTKKEVIRAAALVGLIIMVYRKES-----RQVNEE                | 2336 |
| LIVERWORT       | ---LN---FKGKEVIRASGELIGIVLQKHOAA---QDF-----RRPLDEQ         | 2367 |
| LIGNANO         | ---LN---HSRKEVIRPACAVTGLCLRQMVTAQ---SVV-----P              | 2447 |
| COPEPOD         | ---FT---SKRKEVIRAGAVTGLYLLTLRSNQ---N-----                  | 2220 |
| GLOBOSUM        | ---LT---LSKLLKEVIRPGLACIIGVLLFMETLHNY-----H                | 2198 |
| PALUSTRIS       | ---LV---NGRKEVIRPASEVIGRWTSSARQHAGAI-----A                 | 2254 |
| NEOCALLIMASTIX  | ---IQ---YN-HKNVIRPASELCLLILKRLKKTGMNE-----                 | 2333 |
| GLOMUS          | ---LL---NHVNSVIRAAAEVGLLAVKHLRKYHCSE-----                  | 2388 |
| LOBOSPOR        | ---MG---SS-QKAVISAAAEVGLLVAYMKRHNSLD-----N                 | 2316 |
| SYNCEPHALASTRUM | ---MD---NS-SREVAIPAPLALAKFLMIEKRRN-----I                   | 2301 |
| FUNCTIVORUM     | ---LFSBEGRAKELITRSEVAMQLAQMDKAGNSGSLSSGVSQTQASRQSTED       | 2318 |
| HALBUM          | ---L---TEYKELVDAASHCIMILQFNHKK-----NIQS-                   | 2419 |
| DPURPUREUM      | ---L---QDFKELVDAASVCMILLYNSKN-----NIQS-                    | 2422 |
| PVIOLACEUM      | ---L---QDFKELVDAASVCMILLYNSKH-----QIQSN                    | 2416 |
| AMPHIPOD        | ---LA---NPRAAVINAAAEVGLMLARSMSR---GGVGDVAVPSSSSDLSLSEATVGC | 2337 |
| SHRIMP          | ---LG---AHYASVIRAAAEVGLILKYSQKD---G-----SVE                | 2309 |
| MUDCRAB         | ---LE---AHYASVIRAAAEVGLLVKFOSSH---EDC-----NET              | 2306 |
| TARDIGRADE      | ---LQ---ESSKPLVSVSGITLILFRAEGAGIAGET-----IE-               | 2381 |
| HYDRA           | ---LL---PTYKEVIRPACAVCGIILKYYFSKC---ESP-----K-             | 2246 |
| SALPINGOEA      | ---IM---FKRSVIRPAAFTVCMILSHFKSKGRGRLL-----D-               | 2341 |
| SPIDER          | ---LS---MKYKEVIRAAAEVGLIILQYISKSE---TDI-----LKN            | 2320 |
| LIMULUS         | ---LT---FVRYKEVIRAAAEVGLILNYMTERE---NQT-----EG-            | 2347 |
| SCORPION        | ---LK---NKYKEVIRAAAEVGLILNYMTERE---NQT-----Y-S             | 2308 |
| ROTIFFER        | ---IK---EPKLLIRPAAEVGLMLKRFDSHD---KEY-----FE-              | 2315 |
| CIONA           | ---MR---FKRKEVIRAAAEVGLILNYITNVE---KEE-----NG-             | 2339 |
| OCTOPIUS        | ---LH---HSHKIVRPAAEVGLILKYPDQHK---DSE-----FE-              | 2282 |
| CAPITELLA       | ---MN---OPDKQVIRPAAEVGLMALSSLQNTESDKEW-----CR-             | 2335 |
| LIMPET          | ---MC---DKSKPVIRPAAEVGLMLKYLEVKE---QET-----EG-             | 2311 |
| SCALLOP         | ---LT---HHLRSVIRPAAEVGLMIFOLYAEKE---KET-----DG-            | 2369 |
| LINGULA         | ---MG---SYWKTSSAAAEVGLMCLDLDH---KDF-----KE-                | 2335 |
| OYSTER          | ---MR---NRYKAVIRPAAEVGLMIFKHLAEK---RQT-----EG-             | 2333 |
| SNAIL           | ---MT---NSSKMITPAAAEVGLMIFAYLADKE---NET-----DG-            | 2336 |
| SPONGE          | ---IT---FRYKLVIRAAAEVGLMIMKRMAESY---DPF-----LD-            | 2363 |
| PRIAPULA        | ---LA---NKYKEVIRAAAEVGLMILHRMVERE---DEE-----AEG            | 2361 |
| DANTIO          | ---LS---FVRYKEVIRAAAEVGLILNYMTERE---NQT-----EG-            | 2347 |
| ESHARK          | ---IS---LTRYKEVIRAAAEVGLILVHYFAEN---KQV-----DG-            | 2348 |
| BSHARK          | ---IS---LTRYKEVIRAAAEVGLILVQYLAG---KPM-----DC-             | 2344 |
| XENOPUS         | ---LG---LTRYKEVIRAAAEVGLILVRYVONE---KRT-----EA-            | 2359 |
| STERLET         | ---IS---FGRFKDVRPAAEVGLILMOYLAKNE---KQL-----EG-            | 2362 |
| GAR             | ---IS---FVRYKDIVPAAEVGLILMOYMAEKE---KOS-----EG-            | 2351 |
| HUMAN           | ---MS---FVRYKEVIRAAAEVGLILRYMERE---NIL-----EE-             | 2339 |
| PLATYPUS        | ---LS---LVRYKEVIRAAAEVGLILQYVSEKE---TML-----ED-            | 2343 |
| TASDEVIL        | ---MS---FVRYKEVIRAAAEVGLILQYIAKE---NVL-----ED-             | 2345 |
| COELACANTH      | ---LS---LTRYKEVIRAAAEVGLILVQYAEKE---KEL-----GG-            | 2350 |
| CAECILIAN       | ---IA---LTRYKDIVPAAEVGLILVHYVAEKE---KTL-----EG-            | 2352 |
| CANARY          | ---MG---LLRYKEVIRAAAEVGLILQYIAERE---NIL-----ED-            | 2341 |
| OSTRICH         | ---MG---LLRYKEVIRAAAEVGLILQYIAERE---NIL-----ED-            | 2311 |
| GECKO           | ---MA---LVRKKEVIRAAAEVGLILQYIAEKE---NIV-----EG-            | 2350 |
| TURTLE          | ---MS---LTRYKEVIRAAAEVGLILQYMAEKE---NIF-----EG-            | 2350 |
| ALLIGATOR       | ---MA---LLRYKEVIRAAAEVGLILTRYIAEKE---NIT-----EG-           | 2308 |
| APLYSIA         | ---MN---HHLKIVRPAAEVGLILVLLKMSRD---GEV-----EG-             | 2370 |
| TRICHOPLAX      | ---LQ---FKYKEVIRPAAEVGLIMKHLASVK---KET-----EG-             | 2325 |
| SOFTCORAL       | ---LS---FKYKDVIRPAAEVGLIMKYLSEEN---DKE-----SCD             | 2348 |
| STONYCORAL      | ---LT---FKYKDVIRPAAEVGLIMQLAKVK---KIF-----DG-              | 2373 |
| SEA ANEMONE     | ---LT---FKYKDVIRPAAEVGLIMKYLIEER---KVT-----EC-             | 2335 |
| SEACUKE         | ---LK---SRFKVIRPAAEVGLIMFQMDND---QIT-----DG-               | 2346 |
| LANCELET        | ---LQ---LTRYKDIVPAAEVGLIMKYMADVE---KVT-----EG-             | 2375 |
| STARFISH        | ---LK---NRYKAVIRPAAEVGLIMKQKADV---KVT-----DG-              | 2385 |
| SEA_URCHIN      | ---ID---NRYKAVIRPAAEVGLIMKQMAEND---KIT-----DG-             | 2369 |

Supplementary Figure 6 CLUSTAL OMEGA ALL PHYLA, EXPANDED

|                 |                                                                                                                                          |      |
|-----------------|------------------------------------------------------------------------------------------------------------------------------------------|------|
| PARAMECIUM      | EIINIVT---GIKAD-----NRPGYGKEK <b>FTFMKIL</b> ---TFV <b>PKVLSNN</b> ----                                                                  | 2283 |
| TETRAHYMENA     | EIVNNSV---N-IIN-----KTDKTSKER <b>PIIVACI</b> ---TQV <b>YDPFLNNI</b> ----                                                                 | 2396 |
| STYLNONCHIA     | -LVAQSI---HPLMN-----NEITERHDV <b>VHSIEKI</b> ---TRE <b>YPELLIDR</b> ----                                                                 | 2369 |
| APHANOMYCEsa    | AFESGID---NCLQSFQ-----LDKPR <b>PLTCLKQL</b> ---ATH <b>YPAIVS</b> ----                                                                    | 2171 |
| APHANOMYCEse    | TFQTSVE---TQLALFFQ-----EKKPR <b>PLTGVKQV</b> ---SFH <b>YPPIVD</b> ----                                                                   | 2114 |
| PYTHIUM         | AFRDKLA---EHTKYYS-----EEFGR <b>LALLRSV</b> ---SLH <b>YPNVLD</b> ----                                                                     | 2303 |
| PLASMOPARA      | CFLCNLK---KLADSVT-----SEEIG <b>YLAAILRNV</b> ---SIH <b>YATIVD</b> ----                                                                   | 2285 |
| BREMIA          | AFMCKLK---SLIKAYD-----EEDGR <b>LAILRYA</b> ---SLD <b>YANIID</b> ----                                                                     | 2271 |
| AEDES           | ---QNEFV---AKLVTRM-----KRQEK <b>KMDIITYGI</b> ---HKA <b>YPIIVD</b> ----                                                                  | 2357 |
| MIDGE           | QIVSDIT---ERLEKIRR-----KAGNDF <b>NATQLLYGI</b> ---QKS <b>YPRILD</b> ----                                                                 | 2314 |
| BOMBUS          | AIIDTIR---SILRQ-----MQTKCEN <b>RMKITRAL</b> ---CKN <b>YPLIAM</b> ----                                                                    | 2216 |
| ANT             | EVKQKIF---TILGF-----VKPHT <b>IKIKAVL</b> ---CRT <b>YPPVAL</b> ----                                                                       | 2250 |
| WHIPWORM        | AFKEALR---SAMVKMT-----GTTLD <b>RSKLLISEI</b> ---HKS <b>YSPAS</b> ----                                                                    | 2282 |
| TRICHIANELLA    | WLLKNMK---AVMSRMT-----GTMLGR <b>SKCLFLHEI</b> ---LPN <b>YEPAL</b> ----                                                                   | 2301 |
| BEEBLE          | KLCGNVH---LLLKK-----INEPD <b>KLAHLEGL</b> ---VLH <b>YPPIVN</b> ----                                                                      | 2207 |
| BARNACLE        | AVTPVVA---AKLAA-----VEKDR <b>VRVWTLARI</b> ---SAH <b>CRPLAA</b> ----                                                                     | 2233 |
| THRIP           | KFVDELE---NILKNVN-----LAKRD <b>CEKFLVLLDNV</b> ---SEN <b>YQIID</b> ----                                                                  | 2249 |
| FLEA            | ILLSSVN---RRLDY-----LRRNNT <b>DITILLYGI</b> ---AKH <b>YVDIAY</b> ----                                                                    | 2252 |
| WHITEFLY        | TLNLSVK---TLMQR-----IYKPE <b>PKYRCLLKI</b> ---SL <b>S</b> Y <b>PPVVK</b> ----                                                            | 2318 |
| TICK            | AFKGSVA---SRLDG-----LLAHRD <b>QVVLVVRNV</b> ---CR <b>F</b> Y <b>PLAL</b> ----                                                            | 2282 |
| TERMITE         | EFLSGIV---DKLNL-----TKDQ <b>SKDPLTCLFAV</b> ---Q <b>Y</b> Y <b>PRIVD</b> ----                                                            | 2332 |
| DAPHNIA         | -FEKLVV---DALQMWYN-----RKKVD <b>VVDLLYEV</b> ---AIR <b>YPAVLS</b> ----                                                                   | 2162 |
| OSTREOCOCCUS    | RWHDYLR---KRQSLYD-----AQAWD <b>PLDPLDRV</b> ---TKR <b>CNPPPHDT</b> ----                                                                  | 2318 |
| STEWART         | SLFALLS-----RKESKE <b>IGVYVNIIRKV</b> ---SIC <b>H</b> Y <b>QLLNNK</b> ----                                                               | 2075 |
| KLEBSORMIDIUM   | LLERELH---QRLLSLYR-----FNSAT <b>KAVTIAKAL</b> ---CR <b>T</b> Y <b>PPVAL</b> ----                                                         | 2484 |
| CLUBMOSS        | AVENKFK---QFVSTFK-----ERNY---SK <b>LVILDRL</b> ---TSK <b>YPPYVG</b> ----                                                                 | 2251 |
| MOSS            | ILEAKLH---KILKQLYR-----EA <b>EY</b> ---ER <b>LNILNKI</b> ---TIR <b>YHPGLE</b> ----                                                       | 2374 |
| LIVERWORT       | MLEAPLK---QCLLKFCR-----ESNL---DY <b>LNILYKI</b> ---TFR <b>YPOYGE</b> ----                                                                | 2405 |
| LIGNANO         | AFYQVA---EQLGKML-----TARPD <b>ALHALAQV</b> ---SRC <b>CPRLAC</b> ----                                                                     | 2484 |
| COPEPOD         | VFDKVLN <b>IFL</b> KALS <b>MSL</b> -----NSSAD <b>TRSRITILHGI</b> ---Q <b>S</b> Y <b>PQILI</b> ----                                       | 2264 |
| GLOBOSUM        | -----ASFLSK <b>IEDVCK</b> -----KLQ <b>ASEPKSITILNRI</b> ---SV <b>H</b> Y <b>PRILQ</b> ----                                               | 2226 |
| PALUSTRIS       | -----AQLEEK <b>LNNLLRSLANGV</b> ---RGS <b>GAQDRVILNRI</b> ---SV <b>G</b> Y <b>PDVAV</b> ----                                             | 2297 |
| NEOCALLIMASTIX  | AILNIIT---NKLELL---NPV---NTKN <b>RTVDRKITILHQI</b> ---GIN <b>YBEILD</b> ----                                                             | 2375 |
| GLOMUS          | ALSSLLAN <b>P</b> LQKIS <b>GMY</b> ---Q <b>Q</b> AL <b>S</b> NE <b>S</b> DM <b>KNITVHHI</b> ---SM <b>H</b> Y <b>VDVAV</b> ----           | 2434 |
| LOBOSPOR        | DFQDLVT---KKSSELL <b>V</b> TSG <b>P</b> AP <b>H</b> TR <b>S</b> G <b>S</b> VS <b>ITNLHKV</b> ---QL <b>H</b> Y <b>PEITD</b> ----          | 2363 |
| SYNCEPHALASTRUM | DMESMIV---EKLKRM---DPL---K <b>Q</b> E <b>K</b> ANT <b>G</b> KL <b>S</b> IT <b>YRV</b> ---QT <b>H</b> Y <b>PEIAN</b> ----                 | 2343 |
| FUNGIIVORUM     | VCGQMPR---DKLMTFS-----KGDYD <b>RINMERT</b> ---DL <b>A</b> Y <b>PPILIT</b> ----                                                           | 2356 |
| HALBUM          | VFEKLLK---DKISSFLS-----QSD <b>YORALNLYFI</b> ---GL <b>H</b> Y <b>HRSFIL</b> ----                                                         | 2457 |
| DPURPUREUM      | VFSQLLK---DKINSILG-----N <b>N</b> ET <b>ORAF</b> S <b>LYFI</b> ---GL <b>H</b> Y <b>PLPLQ</b> ----                                        | 2460 |
| PVIOLACEUM      | TFQMLK---DKINTLLA-----N <b>N</b> D <b>YORV</b> S <b>LYFI</b> ---AL <b>H</b> Y <b>PGFVA</b> ----                                          | 2454 |
| AMPHIPOD        | EFFGDVV---ACVMDLI-----SK <b>H</b> Q <b>AO</b> CL <b>SNLYHI</b> ---HK <b>H</b> Y <b>NTIDN</b> ----                                        | 2374 |
| SHRIMP          | ALEDAVV---KRVTELT-----V <b>K</b> M <b>Q</b> GC <b>L</b> TI <b>YNI</b> ---HK <b>H</b> Y <b>PSFVK</b> ----                                 | 2346 |
| MUDCRAB         | SFEENVA---RKVMEMM-----H <b>S</b> K <b>Q</b> GC <b>IT</b> V <b>IYKI</b> ---HL <b>H</b> Y <b>PAVLK</b> ----                                | 2343 |
| TARDIGRADE      | AGVEALR---QFLSGIV-----A <b>T</b> DR <b>D</b> K <b>VAVLHQ</b> A---SK <b>S</b> Y <b>PAIVA</b> ----                                         | 2418 |
| HYDRA           | VLLEMVQ---GSLCELS-----K <b>N</b> N <b>K</b> E <b>K</b> IT <b>V</b> L <b>HST</b> ---Q <b>I</b> N <b>Y</b> PM <b>VVD</b> ----              | 2283 |
| SALPINGOBECA    | ELMNEVV---ARLDQLKK-----D <b>D</b> D <b>A</b> T <b>S</b> K <b>ER</b> IT <b>CL</b> HE <b>L</b> C <b>N</b> V <b>NTG</b> H <b>PPVVD</b> ---- | 2385 |
| SPIDER          | KFFLVKS---QVLDTMK-----H <b>K</b> E <b>S</b> K <b>L</b> Y <b>CLN</b> K <b>I</b> ---H <b>S</b> S <b>C</b> PE <b>IA</b> ----                | 2356 |
| LIMULUS         | AFQNSIE---QRVTELS-----N <b>T</b> K <b>Q</b> D <b>PT</b> V <b>VNKV</b> ---HL <b>H</b> Y <b>PPPIA</b> ----                                 | 2362 |
| SCORPION        | EFCKLVK---TEISS-----L <b>A</b> K <b>D</b> Q <b>L</b> TL <b>LYKI</b> ---N <b>H</b> Y <b>PIFTD</b> ----                                    | 2343 |
| ROTIFFER        | ---NTV---SHLFEIL-----RE <b>A</b> D <b>TS</b> L <b>IT</b> HE <b>KI</b> ---QL <b>N</b> Y <b>AAISE</b> ----                                 | 2349 |
| CIONA           | NVHEMVR---NNLSALP-----K <b>N</b> P <b>K</b> T <b>Q</b> D <b>I</b> TL <b>LHKV</b> ---SM <b>H</b> Y <b>PPMVD</b> ----                      | 2378 |
| OCTOPUS         | KFMKQIE---RVMKTL-----E <b>P</b> KL <b>G</b> N <b>IV</b> CL <b>HKM</b> ---QL <b>H</b> Y <b>PPVAE</b> ----                                 | 2318 |
| CAPITELLA       | AYGDNIQ---KMLLGIIH-----G <b>N</b> K <b>P</b> D <b>Q</b> IT <b>CVHCT</b> ---Q <b>K</b> H <b>Y</b> AF <b>VE</b> ----                       | 2372 |
| LIMPET          | EFHTYII---NNISLQ-----L <b>S</b> K <b>P</b> D <b>N</b> Y <b>IC</b> HK <b>I</b> ---H <b>Q</b> Y <b>PPPTAD</b> ----                         | 2348 |
| SCALLOP         | AFYNHVT---GLMNSIH-----L <b>S</b> K <b>P</b> D <b>N</b> Y <b>IG</b> V <b>HRL</b> ---Q <b>R</b> H <b>Y</b> PP <b>VAA</b> ----              | 2406 |
| LINGULA         | EYVNHHL---SVLSLQ-----Q <b>S</b> N <b>P</b> D <b>T</b> ML <b>CVYKM</b> ---HL <b>H</b> Y <b>HKPIAE</b> ----                                | 2372 |
| OYSTER          | TFHDYVV---NLMNSLQ-----Q <b>S</b> N <b>P</b> G <b>N</b> FL <b>CIHRM</b> ---HL <b>H</b> Y <b>PPIAD</b> ----                                | 2370 |
| SNAIL           | QFHSHVE---SVL---G-----K <b>V</b> AP <b>H</b> PN <b>LV</b> CV <b>HCT</b> ---HR <b>H</b> Y <b>PPMAD</b> ----                               | 2370 |
| SPONGE          | RLEEMVG---EQLFKLSQ-----P <b>L</b> E <b>K</b> S <b>E</b> D <b>K</b> IT <b>CL</b> HK <b>I</b> ---TL <b>C</b> Y <b>KI</b> V <b>P</b> ----   | 2403 |
| PRIAPULA        | ALRDVV---TAMSTLH-----A <b>D</b> A <b>K</b> Q <b>N</b> IT <b>V</b> CL <b>QKM</b> ---TL <b>H</b> Y <b>PAIADREVMTAV</b> ----                | 2405 |
| DANTO           | TLFNITV---TKLMDL-----R <b>K</b> KE <b>V</b> D <b>D</b> K <b>IT</b> V <b>LSKV</b> ---SK <b>H</b> Y <b>PPIVD</b> ----                      | 2385 |
| ESHARK          | IVHDLLA---KELKQL-----Q---Q <b>S</b> K <b>E</b> D <b>K</b> IT <b>V</b> CL <b>SKI</b> ---V <b>K</b> N <b>Y</b> PP <b>ADR</b> ----          | 2386 |
| BSHARK          | AVHDLVV---KELQQL-----Q---N <b>T</b> K <b>E</b> D <b>K</b> IT <b>V</b> CL <b>SKI</b> ---V <b>K</b> H <b>Y</b> PP <b>AD</b> ----           | 2381 |
| XENOPUS         | PVPDYVV---KELKRH-----Q---Q <b>T</b> N <b>K</b> E <b>D</b> K <b>IT</b> ML <b>LNKV</b> ---V <b>K</b> N <b>Y</b> PP <b>AD</b> ----          | 2397 |
| STERLET         | PIFDFTV---KELKHL-----Q---N <b>T</b> K <b>E</b> D <b>K</b> IT <b>V</b> CL <b>SKV</b> ---V <b>K</b> N <b>Y</b> PP <b>IVD</b> ----          | 2399 |
| GAR             | PIFDFTA---HHLKKL-----Q---N <b>E</b> K <b>E</b> D <b>K</b> IT <b>V</b> CL <b>SKV</b> ---V <b>K</b> H <b>Y</b> PP <b>FMD</b> ----          | 2388 |
| HUMAN           | SLCELVA---KQLKQH-----Q---N <b>T</b> M <b>E</b> D <b>K</b> IT <b>V</b> CL <b>NKV</b> ---T <b>K</b> S <b>Y</b> PP <b>LAD</b> ----          | 2376 |
| PLATYPUS        | SICELIV---KQLKQH-----Q---N <b>S</b> R <b>E</b> D <b>K</b> IT <b>V</b> CL <b>NKA</b> ---V <b>K</b> N <b>Y</b> PP <b>LAD</b> ----          | 2380 |
| TASDEVIL        | SVFELV---KQLKQH-----Q---N <b>T</b> K <b>E</b> D <b>K</b> IT <b>V</b> CL <b>NKA</b> ---V <b>K</b> T <b>Y</b> PP <b>LAD</b> ----           | 2382 |
| COELACANTH      | PIIDSVV---RELKQL-----Q---S <b>I</b> K <b>E</b> D <b>K</b> IT <b>V</b> CL <b>SKT</b> ---V <b>K</b> N <b>Y</b> PP <b>LAD</b> ----          | 2387 |
| CAECILIAN       | PLFDCVI---KELKQH-----Q---N <b>A</b> K <b>E</b> D <b>K</b> IT <b>ML</b> LN <b>KV</b> ---V <b>K</b> N <b>Y</b> PP <b>LAD</b> ----          | 2389 |
| CANARY          | PVYDCVI---KQLKHH-----Q---N <b>T</b> Q <b>H</b> D <b>K</b> IT <b>Q</b> CL <b>NKV</b> ---V <b>K</b> N <b>Y</b> PP <b>LAD</b> ----          | 2378 |
| OSTRICH         | PAYDCVI---KQLKHH-----Q---N <b>T</b> Q <b>Q</b> D <b>K</b> IT <b>Q</b> CL <b>SKV</b> ---V <b>K</b> S <b>Y</b> PP <b>LAD</b> ----          | 2348 |
| GECKO           | PVFDLII---KQLKQH-----Q---N <b>T</b> R <b>E</b> D <b>K</b> IT <b>IL</b> LN <b>KL</b> ---A <b>K</b> N <b>Y</b> PP <b>LAD</b> ----          | 2387 |
| TURTLE          | PVYDCVI---KELKQH-----Q---S <b>T</b> K <b>E</b> D <b>K</b> IT <b>V</b> CL <b>NKV</b> ---A <b>K</b> N <b>Y</b> PP <b>LAD</b> ----          | 2387 |
| ALLIGATOR       | PIYDCVV---KQLKQH-----Q---N <b>T</b> K <b>E</b> D <b>K</b> IT <b>IL</b> LN <b>KV</b> ---V <b>K</b> T <b>Y</b> PP <b>VAD</b> ----          | 2345 |
| APLYSIA         | SFHDHLV---SLSNL-----S <b>H</b> A <b>K</b> T <b>D</b> N <b>IV</b> CL <b>HRI</b> ---H <b>K</b> T <b>Y</b> PK <b>P</b> T <b>V</b> ----      | 2407 |
| TRICHOPLAX      | PIFDYVT---QHLSSMVS-----A <b>G</b> R <b>M</b> D <b>V</b> A <b>R</b> IL <b>CLYRV</b> ---Q <b>L</b> H <b>Y</b> PI <b>IAD</b> ----           | 2365 |
| SOFTCORAL       | GLSGLLN---EKLSSM-----T <b>K</b> D <b>L</b> D <b>K</b> IT <b>IL</b> CV <b>HQL</b> ---Q <b>I</b> H <b>Y</b> PP <b>IVD</b> ----             | 2384 |
| STONYCORAL      | PLHDMVG---QKLLSLVN-----R <b>A</b> K <b>P</b> EL <b>D</b> K <b>IT</b> CV <b>HKL</b> ---K <b>L</b> N <b>Y</b> PP <b>IVD</b> ----           | 2413 |
| SEA ANEMONE     | SLIALVE---AKLSPMAT-----K <b>G</b> K <b>D</b> I <b>G</b> K <b>IT</b> CV <b>HRL</b> ---Q <b>L</b> N <b>Y</b> PR <b>IVD</b> ----            | 2375 |
| SEACUCU         | YLHQITT---KELTAL-----S <b>N</b> M---S <b>P</b> E <b>I</b> T <b>INC</b> INK <b>I</b> ---TL <b>H</b> Y <b>PEFAN</b> ----                   | 2383 |
| LANCELET        | SFHTQVE---RYLLPL-----Q <b>V</b> N---Q <b>D</b> V <b>PL</b> CV <b>HKT</b> ---HL <b>H</b> Y <b>PPFAD</b> ----                              | 2412 |
| STARFISH        | FLHSIVT---SELTKI-----S <b>E</b> I---K <b>P</b> D <b>V</b> IT <b>IL</b> HK <b>I</b> ---H <b>F</b> H <b>Y</b> PE <b>FAD</b> ----           | 2422 |
| SEA_URCHIN      | RLHEVTY---KELSQLHL-----G <b>S</b> G---K <b>E</b> V <b>IT</b> IL <b>HKI</b> ---HL <b>H</b> Y <b>PVFTD</b> ----                            | 2408 |

Supplementary Figure 6 CLUSTAL OMEGA ALL PHYLA, EXPANDED

|                 |                                                             |      |
|-----------------|-------------------------------------------------------------|------|
| PARAMECIUM      | -----KI-FQETANLIVQAS-NKERAE-ILRIFP-EPLFQI----EQSTQDPEF      | 2324 |
| TETRAHYMENA     | -----KI-LTYQDVIHQKS-KMDRAY-ILGSL-IFLKKK----LDKRENKKE        | 2437 |
| SPYLONCHIA      | -----KI-FMKLLSFVKTIT-GSMRAS-ILKXFE-RFINVC----RQRKKIE        | 2408 |
| APHANOMYCESa    | -----GVLNRLASLPRLLIQDTLSLHLLDVAH-CHVD-----ATTTL             | 2209 |
| APHANOMYCESa    | -----EVLNRLMSIFPRVWQDTLLCTLDIVYS-SNFQ-----AAEI              | 2152 |
| PYTHIUM         | -----SMLHRLSFVLPKVIALSAWSQSAVHCLFLALNNE-----EUVNEI          | 2344 |
| PLASMOPARA      | -----SMLQRLSSVLSKAVSDAWALLAADTVYNACGND-----GVVKDI           | 2326 |
| BREMIA          | -----SVMQRFVSVLPRAILLDAWALFAIDINHACRND-----AVVKDI           | 2312 |
| AEDDES          | -----S-LAVITNAVPMN-GAPKRI-LEEMLL-SRIEVEF-K-----EQV          | 2393 |
| MIDGE           | -----P-MTLIKFSIPKAI-GRIKTI-YLEMFL-ARLEIE-G-----EFV          | 2350 |
| BOMBUS          | -----DI-FDFVRRSVFRVD-FQGRKS-GLIEFL-LCIPNFTF-----DQI         | 2253 |
| ANT             | -----DI-ITWVIS-----AN-DLAASY-CLIEFM-LAISRFST-----EEL        | 2283 |
| WHIPWORM        | -----S-LABELLSWLPETH-GRLLKAL-CLIEFV-SPVDQR-----ESL          | 2317 |
| TRICHINELLA     | -----Q-CNDLLDWFPSLH-GDLKTA-CLIEFF-AVSKYK-----GDF            | 2336 |
| BEEBLE          | -----EVLNLSLRSRHGVP-KPLKII-YLRILL-SCRDDL-H-----K            | 2242 |
| BARNACLE        | -----S-RVRLLFQLPSEL-GEQKAL-GLQVLH-DIIGDV-----PQL            | 2268 |
| THRIP           | -----N-VSNILVYLNQI-AGHRAL-CLNLLS-KRLEVI-G-----GNP           | 2284 |
| FLEA            | -----P-ITYVIFNISRAI-DLQKTM-LLOILL-SVLELK-G-----EEF          | 2288 |
| WHITTEFLY       | -----E-LRQMVNFTGKNNNLQEK-CLDILQ-LSIDST-G-----SDL            | 2355 |
| TICK            | -----R-LDKLMLLLPRAL-ADFKVA-VLEVLS-LCCHQM-----EQP            | 2317 |
| TERMITE         | -----A-MNHVLFHLPKTY-GIFRTM-CLKIVY-SRLEIL-G-----DDT          | 2368 |
| DAPHNIA         | -----T-ASSNLSLITGLY-GGLKSR-CLIEVA-RSWYIM-----EDP            | 2197 |
| OSTREOCOCCLUS   | -----GL-APLVHSVIDKVI-GEKCL-ALMIVT-RSEDEE-VVRSTYERLLP        | 2361 |
| STENTOR         | -----NI-CFKLSGFIKPLS-GETRAS-LLLLLL-HYABYI-KTCSTFANLPL       | 2119 |
| KLEBSORIDIUM    | -----KH-ASKVAGVMSLP-GDFKIL-VLEML-GYAML-----LEL              | 2519 |
| CLUBMOSS        | -----A-LHVLDLPLRLH-GPSKTV-ALDILL-RDPATA-----NSY             | 2286 |
| MOSS            | -----G-AEMVVDQLSRLP-GAYKVN-ALDILL-RFPKAD-----ANL            | 2409 |
| LIVERWORT       | -----A-ASLLVDLLPKLP-GVLKVI-TLDFIL-RFPSCL-----RSL            | 2440 |
| LIGNANO         | -----IEF-RQRLLFQLPHLT-GDSLAD-CLVCLA-AAATAA-AVDSNCRWPNA      | 2529 |
| COPEPOD         | -----SL-ASKFQYSLKTL-GEDLSL-CLIEMV-SHASEL-S-----QHPQVL       | 2303 |
| GLOBOSUM        | -----N-YKVLFNLYPKLD-LDLKGG-SLEAIL-SWADAI-----PDL            | 2271 |
| PALUSTRIS       | -----D-YAKDLLFILPRLY-GRVRAK-CLYALS-SSAPDI-----EGL           | 2332 |
| NEOCALLIMASTIX  | -----K-YLVLLFLFPLNLS-IDRKIQ-ALBITRLRCQTRK-----DTL           | 2411 |
| GLOMUS          | -----R-LKYVFGILPRLN-N-NKIL-ALEITS-FCAGHD-----PDL            | 2468 |
| LOBOSPOR        | -----A-GPRLLFLFPOLL-GEERRL-ALEIFS-GRAAHR-----PDL            | 2398 |
| SYNCEPHALASTRUM | -----K-ANKVIYLLPSLV-GDLKVL-ALMIVG-RAVTEL-----DDV            | 2378 |
| FUNGIIVORUM     | -----HH-YPRIFQILPRVH-GDFKTV-ALDILL-DWVEHI-----TDV           | 2391 |
| HALBUM          | -----Q-QLKLLNLLPOLS-NEIRLV-ARVVIY-WIADDI-----PEL            | 2492 |
| DUPURPUREUM     | -----N-YGKIFNLLPQIS-NETRLI-VLHIVL-WCVDDI-----QDL            | 2495 |
| PVIOLACEUM      | -----S-YSKI FNLLPQLT-NDIRSM-ALNLLS-WCSNDI-----PDL           | 2489 |
| AMPHIPOD        | -----R-TSKLLVLLPKLY-GLQKMR-AMECLI-APLSTH-----PDC            | 2409 |
| SHRIMP          | -----R-INKLLNLLPKLY-GIHRKN-VLECLI-AHSATM-----EDI            | 2381 |
| MUDCRAB         | -----RV-MNRLLSVLNPY-GIFCTR-VLECLA-SYSSSM-----EDI            | 2378 |
| TARDIGRADE      | -----V-QARILFLMPTLP-GVIKAH-GLDVL-AGADAM-----ADP             | 2453 |
| HYDRA           | -----R-ISQLLYCTSMMF-GTLKTM-CLICLA-SRTEQL-V-----NEQOTI       | 2322 |
| SALPINGOECA     | -----H-VORLLFLAPSLP-GQFKTM-ALETLL-WRAEDI-----PDL            | 2409 |
| SPIDER          | -----N-KT-IPHLLFLYSRVH-GIYKNY-ILEIFY-SRVLEF-----ENS         | 2392 |
| LIMULUS         | -----D-R-LQKLLFLPKVH-GMFKTH-IMEVVA-SRVEYI-----QGG           | 2398 |
| SCORPION        | -----SS-LNKLLYMLPKVH-GIFRKG-LEELIN-SHVENI-----ENA           | 2379 |
| ROTIFFER        | -----R-MTKLVFELPQLY-GDFKVM-CMELL-SIRVLL-----QDP             | 2384 |
| CLIONA          | -----N-VSAVGLLPMKH-GDLRTP-CYELIN-QRASHI-----EDL             | 2413 |
| OCTOPOUS        | -----S-LPKLLYHLLPKLH-GDFQLY-CLIEILL-GNINNV-----DGA          | 2353 |
| CAPITELLA       | -----R-IHKVLFMLPGLY-GVFRTY-ALELIA-AGIENI-----EGA            | 2407 |
| LIMPET          | -----R-LNKLLFMLPNLH-GEFRSL-CLIEVH-GRIGOI-----DNV            | 2383 |
| SCALLOP         | -----K-INKVLFMLPKMH-GEFRSL-SLEIHH-GCIESI-----DNV            | 2441 |
| LINGULA         | -----R-MNKLLFMLPRLH-GEYKRH-CLIEVIS-SRVQNM-----ENA           | 2407 |
| OYSTER          | -----R-MNRLLFVLPNLH-AEFRNR-CLIEVL-TRIDTL-----ENV            | 2405 |
| SNAIL           | -----R-LNKLLFMLPGLH-GEFRVQ-CLIEVIM-GCIEQL-----DDA           | 2405 |
| SPONGE          | -----R-VEKLLFLLPSLQ-GVFRSS-CLIEILD-TQADVQ-----PQF           | 2438 |
| PRIAPULA        | SDRYLGQVCGDR-----MSKLLFMLPSLQ-GSFRSQ-CLIEVIL-TRVAHT-----QNL | 2451 |
| DANTIO          | -----R-INPVFYLLPKLH-GMLKTH-CLIEVIL-SRADVI-----PEI           | 2420 |
| ESHARK          | -----R-LWQVYLLPKLH-GVLKTH-CLIEVIM-HRAEDI-----IDI            | 2421 |
| BHARK           | -----R-MNAVFFLLPKLY-GILKTH-CLIEVIM-YRAEEI-----PDI           | 2416 |
| XENOPUS         | -----R-MTIVLFLPKLH-GVLKTH-CLIEVIM-HRAEDI-----PDL            | 2432 |
| STERLET         | -----R-LNAVFLPKLH-GVLKTH-CMELIM-SRAEEV-----TDI              | 2434 |
| GAR             | -----R-VNAVFFLLPKMH-GVLKTH-CLIEVIL-SRAEEI-----PDV           | 2423 |
| HUMAN           | -----R-MNAVFFLLPKFH-GVLKTH-CLIEVIL-CRVEGM-----TEL           | 2411 |
| PLATYPUS        | -----R-LNAVFFLLPKLH-GVMKTF-CLIEVIL-CRAEEI-----TDL           | 2415 |
| TASDEVIL        | -----R-MNAVFFLLPKFH-GVMKTL-CLIEVIL-CRAEEI-----HDL           | 2417 |
| COELACANTH      | -----R-MSVFFLLPKLH-GVLKTH-CLIEVIM-SRAEEI-----PDI            | 2422 |
| CAECILIAN       | -----R-MTVVFLPKLH-GVLKTY-CLIEVIM-CRAEEI-----PDL             | 2424 |
| CANARY          | -----R-MNAVFFLLPKLH-GVMKTY-CLIEVIM-CRAEEV-----PDL           | 2413 |
| OSTRICH         | -----R-MSAVFFLLPKLH-GVMKTH-CLIEVIM-CRAEEI-----TDL           | 2383 |
| GECKO           | -----R-MNAVFFLLPKLH-GVMKTY-CLIEVIM-GRAEIG-----PSL           | 2422 |
| TURTLE          | -----R-MNAVFFLLPKLH-GVLKTY-CLIEVIM-YRAEEI-----TDL           | 2422 |
| ALLIGATOR       | -----R-LNAVFFLLPKLH-GVLKTH-CLIEVIM-CRAEEI-----TDL           | 2380 |
| APLYSIA         | -----R-LSKLLFLLPNLH-GEFRPA-CLIEVIL-GHVDQM-----EDA           | 2442 |
| TRICHOPLAX      | -----R-VNKVFLMPSLY-GEFKTK-CLIEVIL-ARADHI-----KEL            | 2400 |
| SOFTCORAL       | -----G-INQILFVQVHVH-AQFKTL-CLIEVIL-SRVGVI-----PNL           | 2419 |
| STONYCORAL      | -----R-VNQILFTLPSVH-GDFKSY-CLIEVIL-SRVEHI-----PNL           | 2448 |
| SEA_ANEMONE     | -----R-MKHIMFHLPTH-GVFKAQ-CLIEVIL-SRVSDI-----PDL            | 2410 |
| SEACUCU         | -----R-LNKLLFVLPSTY-GAPRVQ-CLIEVIS-SRVEKI-----ENV           | 2418 |
| LANCELET        | -----R-VSKLLFMLPKLH-GIFRTH-CLIEVIR-GRVNI-----DNL            | 2447 |
| STARFISH        | -----H-TNKLLFMLPSLH-GQPKTL-CLIEVVA-SRVSHI-----PNI           | 2457 |
| SEA_URCHIN      | -----R-MNKLLFMLPSLH-GQPKTE-CLIEVIT-ARIEHI-----DNA           | 2443 |



Supplementary Figure 6 CLUSTAL OMEGA ALL PHYLA, EXPANDED

|                 |                                                            |      |
|-----------------|------------------------------------------------------------|------|
| PARAMECIUM      | -----LHCPNQLD--K-----IDQKYGVDRDIGIVKTYGNILKLLHE            | 2408 |
| TETRAHYMENA     | -----IQLMRIHS--I-----LKQFYERHYQEKFATAYTYIVVNLVD            | 2520 |
| STYLONCCHIA     | -----DKLMQRVLP--R-----LKQLFQHNKNDYSGLFYDLMVLYD             | 2486 |
| APHANOMYCESa    | -----TA-DMH-QVLL--DG-----DAAVTAFES--SEP-CRMKVLID----FL     | 2276 |
| APHANOMYCESa    | -----SE-DYQ-MVLL--SG-----DCSVLFAPEN---ESQCMKVLQ----FV      | 2218 |
| PYTHIUM         | -----DT-SVA-CRFIMREDQG--GIDLFQDITVRERDTPVRRIFDYDAKKLYQ     | 2422 |
| PLASMOPARA      | -----TM-SEL-NRLVASTSEG--GFDLFRYIQGHALSVCRGLLFSIAKNLYH      | 2404 |
| BREMIA          | -----TV-SEI-DRLVANALEG--GIDVFRHYEGHTS--EERALLFTLAKELYH     | 2389 |
| AEDDES          | -----SG-ENL-ENLE--N-----IVSMGTGNDRADVRIIVEILIFLQE          | 2462 |
| MIDGE           | -----KN-DEI-ESLMN--D-----LMPLVNSPRDVRRIYEMMIFIVE           | 2419 |
| BOMBUS          | -----PP-PNI-LSFTT--L-----VPPYTKHKLSETRELAYSIFIMIKY         | 2324 |
| ANT             | -----VP-TDL-LPYM--L-----VIPVXDSITRELEVIDIMKIYK             | 2354 |
| WHIPWORM        | -----ST-AQI-EELNR--V-----LSSVSHPLANSRCRFAELCCSMD           | 2388 |
| TRICHIANELLA    | -----TV-ENI-SDLNS--S-----FSSVIGNFSPSCRRAFAEMCCSLYT         | 2407 |
| BEETLE          | -----AP--TP-PEIVQ--S-----VCKNVSNINVLCTKVVDDVMAL--          | 2312 |
| BARNACLE        | -----SA-GQW-ARFLP--A-----IDFVVNHGGAPGRLAELCIELRR           | 2341 |
| THRIP           | -----QD-SEL-DEVIH--H-----ISPINCYVKGEARNLVEISLIAFD          | 2357 |
| FLEA            | -----QN-DLN-RPGLIQY--Y-----AKRLISSEDTNCRSVVDIAMTSYK        | 2359 |
| WHITTEFLY       | -----LP-TDL-QKVIIVAF--Y-----LNLVSSSKRDESKLIFETVSILYS       | 2433 |
| TICK            | -----TE-EDW-GATLP--V-----VCOLOGHTSGACRKLIVDVCMLYA          | 2388 |
| TERMITE         | -----KP-EQL-EELVH--E-----ICKFETQRSVKCRSMVEILKWIYD          | 2439 |
| DAPHNIA         | -----EV-EEW-KPLMP--T-----LIRLSRHQNVRECRSLDEVFKAFD          | 2268 |
| OSTREOCOCCUS    | -----VATIESSLH-KQWSALTE--A-----DSAVDTESVNVREAHKMCIAVAE     | 2431 |
| STENTOR         | -----NP--SIKKHV-SGILP--N-----LSSVASASSKDELLEEVQKAYD        | 2193 |
| KLEBSORMIDIUM   | -----SREAVE-TVLP--I-----LCPVPSRHDNPECRNFBFLELFR            | 2591 |
| CLUBMOSS        | -----ADPNST-QKXVL--E-----TCDAVHYHTEERLQYQMLMPLYE           | 2358 |
| MOSS            | -----NQDTR-TRVLP--V-----LCDNFNGHENVDRCRFBYELIYLFPK         | 2481 |
| LIVERWORT       | -----PDQSIH-EKVLH--V-----VCETFTHESVDRCRLYYDLLICLHA         | 2512 |
| LIGNANO         | RLADAQAIAIKQR-VWLLA--AVGEMCLASTGAGAGSVAALTPQARRJAYQILATWYP | 2638 |
| COPEPOD         | -----DV-GVR-KEYYE--L-----LKDFTSKSYTEQRKHLVEIFKDG-Y         | 2373 |
| GLOBOSUM        | -----SH-SQT-AKFLG--L-----AVDLFSIHGSDRVAAPFPMIFKKE          | 2343 |
| PALUSTRIS       | -----RN-EDV-SYFLA--T-----ALETFSGHPSAKCRSAFYTLMMRLHE        | 2404 |
| NEOCALLIMASTIX  | -----SI-NQI-KFFLN--N-----S-NHFIKHSSLRCRNIYALKYIYQ          | 2482 |
| GLOMUS          | -----EV-STP-EYFLD--G-----LIESFQDHPNNDRCRRIYITILVRMYN       | 2540 |
| LOBOSPOR        | -----KV-DQI-LYFLD--T-----IVLEFSHHPSVCRKLYSILMTLFD          | 2470 |
| SYNCEPHALASTRUM | -----SS-DMI-SYMLD--T-----LVDIKAKHVNDRCRLYFSLKRCYD          | 2450 |
| FUNCTIVORUM     | -----GDN--DI-KPL-LEAV--K--S-----PVTR-----TTSQKVMELMELLYE   | 2464 |
| HALBUM          | -----TDQ--TL-LQI-INLAL--D--C-----R--RNQSPNETRLLYDIPMWHID   | 2567 |
| DUPURPUREUM     | -----PVS--TI-GQI-LQLLL--L--N-----NSFTSNITSEYRSLEFYDIVIYYN  | 2572 |
| PVIOLACEUM      | -----DSS--QK-QQL-VNLLK--E--Q-----HGLLSSTTNEHCRLLYYEMIMYIYH | 2567 |
| AMPHIPOD        | -----TA-SQV-LTFLP--F-----LVSLFKHPVSSCREVVTSLTFLHD          | 2480 |
| SHRIMP          | -----TP-SQL-LYFMP--G-----VVAFASHPAPSCEMVDLFWVYD            | 2452 |
| MUDCRAB         | -----TP-SQV-LYFLP--G-----ITGFASHPGAKCREMVDLFWIYD           | 2449 |
| TARDIGRADE      | -----SA-SDL-AEVLL--E-----MVDLGSHGSPLMRQKYEFECMYLYE         | 2524 |
| HYDRA           | -----SL-EQL-LPILK--K-----IEPLQKSFVVKREIVKIFMKCFD           | 2393 |
| SALPINGOECA     | -----NA-SSI-KQFLP--S-----VTANCCSHDDYVRAIAYDILMAVYD         | 2481 |
| SPIDER          | -----SC-DDI-LHILP--S-----IVGHTQPNSHRLALFKILFLFFE           | 2463 |
| LIMULUS         | -----TS-DM-L-LEVLP--M-----IILKLSQQNPLTREVMIQILMDVYA        | 2469 |
| SCORPION        | -----DI-DRM-LNVFP--I-----ISKVHKSAPTECRKVMELMHAYE           | 2450 |
| ROTIFFER        | -----TD-EDL-DRIMP--H-----LEKFIHPHLSRQYVILLISLYE            | 2453 |
| CLONA           | SPTDQ--QY-KIV-LQFLP--E-----IFKVPKSHSNPKRKBAL-ELAMWLYD      | 2496 |
| OCOTOPUS        | -----KP-NEL-AEIFS--S-----INHQKEEPWVACRKLVDILMWVYD          | 2424 |
| CAPITELLA       | -----EA-SQL-LYLLP--A-----ICEISDLSSVLCRKVMQILMWVYD          | 2478 |
| LIMPET          | -----KS-KEM-SSLMD--S-----ITAFSHHPSTLCKRVMELLMWIYD          | 2454 |
| SCALLOP         | -----EA-KEL-MSLLP--L-----VTAFSSHPSTSCRTIMVDLMWVYD          | 2512 |
| LINGULA         | -----QP-DEV-LYFLP--A-----VTAFSSSPSMCRGLMVDILMWIYD          | 2478 |
| OYSTER          | -----QP-SEV-SELPL--L-----ICGFCVSPSIPCRNVMVDILMWVYD         | 2476 |
| SNAIL           | -----SA-TEL-OTFLP--A-----ITGFSNHPSVTQRIIMMKILMWTYD         | 2476 |
| SPONGE          | -----TN-DQL-SEIVP--I-----LIASFSGKHSIQCRIVLNLNLMRVYN        | 2510 |
| PRIAPULA        | -----SP-GEL-LFLPL--A-----VTSIGTHPKAPCRQLMVDILMWVYD         | 2522 |
| DANTO           | -----KP-EEL-KEILG--A-----VTAFAHSPSPVCRKVMVDILMWIQD         | 2491 |
| ESHARK          | -----KA-EV-KVFLV--P-----VIAFISHSPSVCRKVMVDILMWIYD          | 2492 |
| BHARK           | -----KS-AEL-KEILL--S-----VVAFISHSPSIPCRKVMVDILMWIYD        | 2487 |
| XENOPUS         | -----TP-AEL-HEFLI--P-----VTAFFSSHSPVCRKVMVDIPMWIYD         | 2503 |
| STERLET         | -----KP-VEL-KELLI--S-----VTAFTTHSPVCRKVMVDILMWIYD          | 2505 |
| GAR             | -----KP-VEM-REMLG--A-----VTSFVTHSPVCRKVMVDILMWIYD          | 2494 |
| HUMAN           | -----KP-VEL-RELLN--P-----VVEFVSHPSTCRKVMVDILMWIYD          | 2482 |
| PLATYPUS        | -----KP-GEL-RELLN--V-----VVEFISHPSVCRKVMVDILMWIYD          | 2486 |
| TASDEVIL        | -----KP-VEL-QEILLN--C-----VVEFISHPSVCRKVMVDILMWIYD         | 2488 |
| COELACANTH      | -----KP-VEM-KEFLV--A-----VTGFIHSPSTVCRKVMVDILMWIYD         | 2493 |
| CAECILIAN       | -----KP-MEL-GELLN--T-----VVTFSHSPSMCRKVMVDILMWIYD          | 2495 |
| CANARY          | -----KP-LEL-KELLP--G-----VTGFIHSPSVCRKVMVDILMWIYD          | 2484 |
| OSTRICH         | -----KP-LEL-KELLP--G-----VTGFIHSPTVCRKVMVDILMWIYD          | 2454 |
| GECKO           | -----TP-AEV-QELLP--T-----VTGFIHSPSLCRKVMVDILMWIYD          | 2493 |
| TURTLE          | -----KP-LEL-RELLP--G-----VTCGFIHSPSVCRKVMVDILMWIYD         | 2493 |
| ALLIGATOR       | -----KP-LEL-RELLP--G-----VTGFIHSPSVCRKVMVDIMMWIYD          | 2451 |
| APLYSIA         | -----SP-AEL-LSLLP--S-----VKSFSSHSSSACTVMLEVPWVAYD          | 2513 |
| TRICHOPLAX      | -----DI-SQI-LYLAE--L-----VATFKTNPSAACRKMVGIFMWIYD          | 2471 |
| SOFTCORAL       | -----SV-GDI-OTLPL--S-----VTFDLSKSVACRGLMVDILWIYD           | 2490 |
| STONYCORAL      | -----TI-PEL-KFIFP--L-----LTSFVSHPNLLCRDLMVDIFWIYD          | 2519 |
| SEA_ANEMONE     | -----KM-SEI-EYVVP--S-----IATMATSSSTAACRELYDIFMWVYD         | 2481 |
| SEACUKE         | -----SP-AEL-TTLLP--D-----VEAFTSVSSIGCREVMVDIFWIYD          | 2489 |
| LANCELET        | -----KV-EEL-LYLLP--S-----VAAFAHSPAPECRKVMVDIMMWIYD         | 2518 |
| STARFISH        | -----KP-DEI-LYLLP--P-----VRTVFNLPSPACREVMVDILMWIYD         | 2528 |
| SEA_URCHIN      | -----KP-SEL-RYLLP--A-----VKDFVSHPSPSCRKVMVDILMWIYD         | 2514 |

Supplementary Figure 6 CLUSTAL OMEGA ALL PHYLA, EXPANDED

|                 |                                                             |      |
|-----------------|-------------------------------------------------------------|------|
| PARAMECIUM      | YLINYDH-----KELQGVTTYILSLFSSQH-IEIRN-----                   | 2439 |
| TETRAHYMENA     | YLINQESDLKDKQINSESEEMNQFSQVKSCLLCLFSSQH-NTIRE-----          | 2565 |
| STYLNCHIA       | -----QFENFKPLVKSALIRCLSDRT-KVVRN-----                       | 2513 |
| APHANOMYCEsA    | LATTK-----GGVNVQRIILKALADAN-ADVRG-----                      | 2304 |
| APHANOMYCESe    | ISIDK-----LSVPAVQILSLKALSRI-ADVRE-----                      | 2246 |
| PYTHIUM         | KNLDE-----PLKDRLRALLQGLADPD-ISIRT-----                      | 2450 |
| PLASMOPARA      | KDISD-----PGKLRVRSLLHGLADPD-EILRN-----                      | 2432 |
| BREMIA          | IGISD-----QSKSKIKVSLHGLADPD-ASRRK-----                      | 2417 |
| AEDES           | NSTP-V-----LSSESQKLRALLAGSDPE-QSIOQ-----                    | 2493 |
| MIDGE           | RFKSDE-----MSSLIRKKAIEIILKPTDNN-VEIRN-----                  | 2451 |
| BOMBUS          | KYFGD-----SSGNNE--IKELMQISKELIINGLDPT-ETLQE-----            | 2360 |
| ANT             | RYSTD-----ITADDVVQNLLSISVQNLVGLDPS-HLOLD-----               | 2392 |
| WHIPWORM        | KLRSFI-----LSADSSLEVKSAMESLTHEHSLLDKKE-EPVRO-----           | 2428 |
| TRICHINELLA     | KLSSLN-----DSENSKAALATTKMHLLTMLSDSN-KSIRQ-----              | 2443 |
| BEEBLE          | -----CETGILPEVKPVLVQGLDDED-TEIRE-----                       | 2338 |
| BARNACLE        | RFRD-----D-SEEAAGVRARATDALLVLLDAD-LTVRO-----                | 2375 |
| THRIP           | RYLPMHE---SNKL-SEIEKKIFDESKALLLLGLSDSN-ADLQK-----           | 2396 |
| FLEA            | IIQFK-----SDYDILQNVQYIILLLGLDSD-AQMDN-----                  | 2390 |
| WHITEFLY        | RYCNN-----PALEDNIKNRCKELIIRGLVDRN-AEIQK-----                | 2466 |
| TICK            | KYR-S-----KTSAAGLAKQSKHVLVGLDPE-DSLRL-----                  | 2420 |
| TERMITE         | HCQ-D-----IGGVLEIEAKGILLKGRDD-PhLDQ-----                    | 2469 |
| DAPHNIA         | LSGSHDS-----EFAQAVLTKQSDQD-EELAV-----                       | 2294 |
| OSTREOCOCCUS    | AFPGLVN-----EASLARGPLQGLDPPVSTFCRD-----                     | 2460 |
| STENTOR         | ESKMDGE-----SIKRSKAREVLLKGLDR-ES-D-----                     | 2423 |
| KLBSORMIDIUM    | PAPDKG-----MPHPQOVORHLLGLDPA-BELRE-----                     | 2622 |
| CLUBMOSS        | ----TKK-----LPHDSRIARFVNLGLDVA-DSVRO-----                   | 2385 |
| MOSS            | ----NKG-----MDKERLVIQSLMLGLDSS-DIVRA-----                   | 2508 |
| LIVERWORT       | ----IEG-----LKSNDLLIRSLLAGLSDA-EIVRS-----                   | 2539 |
| LIGNANO         | THPN-----LCAPALLAGLSDA-ESNRA-----                           | 2661 |
| COPEPOD         | --LDPT-----NADLKSVCLEQLMGLDTD-EGLSE-----                    | 2402 |
| GLOBOSUM        | SPAVEH-----DAVLKRLVKYSLKGLSDS-NGIRS-----                    | 2374 |
| PALUSTRIS       | RTDL-----EAKINRVLKLALGLDPT-EEIRG-----                       | 2433 |
| NEOCALLIMASTIX  | VNM-----DEEIKNSVKSLLGLDSD-EEIRN-----                        | 2510 |
| GLOMUS          | KING-----TVEIKHKLKINLIRGLDTD-ESIQO-----                     | 2569 |
| LOBOSPOR        | KHST-----TPEVANVLRVQLIRGLDYN-ESIRH-----                     | 2499 |
| SYNCEPHALASTRUM | TLMD-----DSPLKIRINSEILKGLDGD-KTIQQ-----                     | 2479 |
| FUNCTIVORUM     | KDPLVRS-----C-EQ-----DLTSQILMGLDE-ESISN-----                | 2492 |
| HALBUM          | YLEKDVII--D-QN-----QIRLTLILGLSDS-EAVKR-----                 | 2596 |
| DUPURPUREUM     | -NPFSEFQ--D-DK-----QLILSLLILGLDEG-ESINK-----                | 2600 |
| PVIOLACEUM      | QNFNDAD--Q-DR-----DILCLLILGLDES-EMIGK-----                  | 2596 |
| AMPHIPOD        | RYQCESS-----EDQKEVYCTVHDALLQVAD-TELNR-----                  | 2514 |
| SHRIMP          | NFSNNDT-----EDGHQLESQARGVLLRWKED-AALRQ-----                 | 2486 |
| MUDCRAB         | NFRESSD-----SEGSQIEAKTRVSLGLVAKED-AALRQ-----                | 2483 |
| TARDIGRADE      | RFENSTV-----ADEQTLQLIIRTRLPGLKDRD-KTIKD-----                | 2558 |
| HYDRA           | HFKEKRE--E-ETSKLILQICKETLLVGLDRN-TDLNL-----                 | 2428 |
| SALPINGOEA      | QKLSHERGDV-VLADDETAALTEIAQLARTHLLGLDSS-PKLR-----            | 2536 |
| SPIDER          | KFSDSSG-----AKEKEITRYSRETLGLDPP-PSIRL-----                  | 2497 |
| LIMULUS         | NFSMKSQ-----AKEKEITRILAKETLLGLDQN-IALLRLLVNNFWSNPSRLPS----- | 2517 |
| SCORPION        | KFNFKWG-----IKEKEISRIAKEMLLGLDSD-LTLRLTVHNFWSQNNHLPA-----   | 2498 |
| ROTIFFER        | TYQFKVNI--QI-----QSITSQILMFKENLLGLDDED-TSIRV-----           | 2489 |
| CLIONA          | HOKSLS--ST--DQHSIMKLSKIFALKGLDPE-ELLRN-----                 | 2531 |
| OCTOPUS         | NYGEETS-----EESQIMSNTRELILKGLDQD-YSCRI-----                 | 2458 |
| CAPITELLA       | NYKDEA--QS-----ESRDEIITLTKDVLRLGLDSD-LTNRL-----             | 2513 |
| LIMPET          | NYREDE--C-----TEGHEIMLTKKELKGLDDED-MMCR-----                | 2488 |
| SCALLOP         | NYRGDD--N-----EDAHI IQQTKEGLLGLDDED-LHSRL-----              | 2546 |
| LINGULA         | NYRDEN--N-----ATVHQIMSRTKDALNGLSDK-LGLRL-----               | 2512 |
| OYSTER          | NYREDE--S-----ETADTIMQQTKESSLKGLDDED-MQCR-----              | 2510 |
| SNAIL           | NYRDNE--S-----KEGQEMKVTQESLLGLDQDN-LHCR-----                | 2510 |
| SPONGE          | KLCTDDQ--SESD--DSVKMIRSIRDQLLGLDDES-NEVRL-----              | 2548 |
| PRIAPULA        | SYRDSEG-----EEDKLASLARDSLGLDSD-DSLRL-----                   | 2556 |
| DANTIO          | NYSDSE--SRSD--STSVEVLSVARETLGLDQDEN-YGLQL-----              | 2528 |
| ESHARK          | NYRDAE--SQSD--PDSKAVFVTKDGLDQDEN-PALQL-----                 | 2529 |
| BHARK           | NYRDPE--SQSD--PDSKEIYVTSDALGLDQDEN-PALQL-----               | 2524 |
| XENOPUS         | NYRDHE--SQND--SKSVEVFNMAKEGLGLDQDEN-TELQL-----              | 2540 |
| STERLET         | NYRDPE--SQSD--SVSTEVFNLAKETLGLDQDEN-QGLQL-----              | 2542 |
| GAR             | NYRDSE--SQSD--SDSLEMLNVAKETLGLDQDEN-QGLQL-----              | 2531 |
| HUMAN           | NYRDPE--SETD--NDSQEIFKLAKDVLGLDQDEN-PGLQL-----              | 2519 |
| PLATYPUS        | NYRDPE--SQAD--EESREVFKLAKELGLDQDEN-HGLQL-----               | 2523 |
| TASDEVIL        | NYRDLE--SQTD--EVSQEVKLAKAVLGLDQDEN-LGLQL-----               | 2525 |
| COELACANTH      | NYRDQE--SQAN--NESREVLKASEVLLGLDQDEN-PGLQL-----              | 2530 |
| CAECILIAN       | NYRDPE--SQAN--DDSQEVFSRANDVLLGLDQDEN-AGLQL-----             | 2532 |
| CANARY          | NYSDPE--SQAD--DDSREILKVAKEVLLGLDQDEN-AELQL-----             | 2521 |
| OSTRICH         | NYSDPE--SQAD--GDSQEVKLAKAVLGLDQDEN-AELQL-----               | 2491 |
| GECKO           | NYRDPE--SQAD--EKSSEVFLAKAVLGLDQDEN-SGLQL-----               | 2530 |
| TURTLE          | NYRDPE--SQAE--EESQEVFLAKAVLGLDQDEN-SGLQL-----               | 2530 |
| ALLIGATOR       | NYRNSD--SQAD--EDSQEVFKAVKEMLGLDQDEN-SELQL-----              | 2488 |
| APLYSIA         | NYRAGED-----EESHVRMSLTKEALLRGLDQDEN-LACRL-----              | 2547 |
| TRICHOPLAX      | TRQEID--KNDE--TKQLINFCQDQLGLDQDEN-EEENRL-----               | 2507 |
| SOFTCORAL       | TYRFDET--FKNEDSEGSVDLRCRTKNVLLGLDQDEN-KEMRL-----            | 2530 |
| STONYCORAL      | SYRADEA--FQAE--EGSADILADAKHLLGLDQDEN-RDLQL-----             | 2557 |
| SEA ANEMONE     | TYRSDET--FRNE--EGSEEILATAKDYLLRGLDQDEN-KILKL-----           | 2519 |
| SEACUKE         | HYRDEV--RMEE--EGVPKVLGMADALLGLDQDEN-PYLRL-----              | 2526 |
| LANCELET        | NYREEA--SQQE--S-AGRVLTAKDCLLGLDQDEN-SYLRL-----              | 2554 |
| STARFISH        | NFRDEE--SRTE--DGADDILCMADKTLGLDQDEN-ASHRL-----              | 2565 |
| SEA_URCHIN      | NYRDED--KREG--QDGDEALSIAKDTLLGLDQDEN-NYLRL-----             | 2551 |

Supplementary Figure 6 CLUSTAL OMEGA ALL PHYLA, EXPANDED

|                 |                                                               |      |
|-----------------|---------------------------------------------------------------|------|
| PARAMECIUM      | -----LCF <b>K</b> Y <b>L</b> ODDLERKAIQL                      | 2456 |
| TETRAYMENA      | -----NTFK <b>L</b> LDRETN                                     | 2576 |
| STYLONCCHIA     | -----KLI <b>S</b> FNSDSSR                                     | 2524 |
| APHANOMYCEsa    | -----KVAS <b>S</b> VEA-H                                      | 2313 |
| APHANOMYCEse    | -----RAY <b>E</b> FWEK-Q                                      | 2255 |
| PYTHIUM         | -----EVL <b>T</b> FCNGSEL                                     | 2461 |
| PLASMOPARA      | -----EAY <b>N</b> FNSFAS                                      | 2443 |
| BREMIA          | -----EAF <b>D</b> FNTSAI                                      | 2428 |
| AEDES           | -----RMF <b>D</b> FVTNESR                                     | 2504 |
| MIDGE           | -----RVAN <b>F</b> LSLDNE                                     | 2462 |
| BOMBUS          | -----MLL <b>N</b> FVTQDAK                                     | 2371 |
| ANT             | -----KIL <b>K</b> FVTEETS                                     | 2403 |
| WHIPWORM        | -----IVF <b>N</b> FVNDKDR                                     | 2439 |
| TRICHINELLA     | -----LVY <b>N</b> FVCDASR                                     | 2454 |
| BEEBLE          | -----RVY <b>N</b> FVRNNS                                      | 2349 |
| BARNACLE        | -----TAAN <b>V</b> ADAGA                                      | 2386 |
| THRIP           | -----KSF <b>S</b> KVTDDEER                                    | 2407 |
| FLEA            | -----KMQ <b>T</b> FVQSENA                                     | 2401 |
| WHITEFLY        | -----SLY <b>E</b> FVMKDNV                                     | 2477 |
| TICK            | -----SVAN <b>F</b> VSQETQ                                     | 2431 |
| TERMITE         | -----SIF <b>E</b> FVNSDAQ                                     | 2480 |
| DAPHNIA         | -----KMQ <b>N</b> FVLAEK                                      | 2303 |
| OSTREOCOCCUS    | -----SALA <b>N</b> VNTRLQ                                     | 2471 |
| STENTOR         | -----GIM <b>K</b> FVHDH                                       | 2234 |
| KLEBSORMIDIUM   | -----EAG <b>F</b> FVGLQ                                       | 2631 |
| CLUBMOSS        | -----SLQ <b>F</b> FVDAQ                                       | 2394 |
| MOSS            | -----SLQ <b>N</b> FVHLQ                                       | 2517 |
| LIVERWORT       | -----TVQ <b>K</b> FVSSI                                       | 2548 |
| LIGNANO         | -----WLL <b>E</b> FVSRNSG                                     | 2672 |
| COPEPOD         | -----FCS <b>N</b> FVNLFL                                      | 2413 |
| GLOBOSUM        | -----SLL <b>E</b> FVNSKVF                                     | 2385 |
| PALUSTRIS       | -----AVT <b>S</b> FVLRQGG                                     | 2444 |
| NEOCALLIMASTIX  | -----NIL <b>S</b> FVHDS-S                                     | 2520 |
| GLOMUS          | -----ALIE <b>F</b> VHAQEE                                     | 2580 |
| LOBOSPOR        | -----TVVE <b>F</b> VYSKDR                                     | 2510 |
| SYNCEPHALASTRUM | -----TVVE <b>F</b> VEARHG                                     | 2490 |
| FUNGIIVORUM     | -----KLL <b>F</b> FVLDRL                                      | 2501 |
| HALBUM          | -----KLL <b>E</b> FVDTSK                                      | 2607 |
| DPURPUREUM      | -----KLL <b>E</b> FVDNNTKT                                    | 2612 |
| PVIOLACEUM      | -----KLF <b>E</b> FVDNVNS                                     | 2608 |
| AMPHIPOD        | -----FILD <b>F</b> VTRRAQ                                     | 2525 |
| SHRIMP          | -----IVL <b>R</b> FVLQGAR                                     | 2497 |
| MUDCRAB         | -----TVL <b>R</b> FVLERFQ                                     | 2494 |
| TARDIGRADE      | -----LLT <b>A</b> FVAQEK                                      | 2569 |
| HYDRA           | -----VLL <b>N</b> FVVRKE                                      | 2437 |
| SALPINGOECA     | -----SIV <b>A</b> FVDQEK                                      | 2547 |
| SPIDER          | -----IVD <b>N</b> FVSNEK                                      | 2508 |
| LIMULUS         | ATKERFLTLQQMYSPPTEDKFLEYGTFLMSSDECFTLYISLIVD <b>N</b> FVSNEKR | 2571 |
| SCORPION        | ETFSRIKAVLQKMYSPETIEHM-----FSSDECFTLYISLIVD <b>N</b> FVSNEKR  | 2543 |
| ROTIFFER        | -----MAG <b>F</b> FVTEKAD                                     | 2500 |
| CIONA           | -----RAM <b>N</b> FVSDES                                      | 2542 |
| OCTOPUS         | -----LVH <b>N</b> FVSNRTR                                     | 2469 |
| CAPITELLA       | -----TVQ <b>N</b> FVSHETR                                     | 2524 |
| LIMPET          | -----LVQ <b>N</b> FVSSDTR                                     | 2499 |
| SCALLOP         | -----LIQ <b>R</b> FVSSETR                                     | 2557 |
| LINGULA         | -----RVM <b>F</b> FVSHESR                                     | 2523 |
| OYSTER          | -----LVQ <b>N</b> FVSSETR                                     | 2521 |
| SNAIL           | -----TMQ <b>N</b> FVSSESR                                     | 2521 |
| SPONGE          | -----KMY <b>E</b> FVNQESN                                     | 2559 |
| PRIAPULA        | -----IVT <b>N</b> FVSHATR                                     | 2567 |
| DANTIO          | -----YVR <b>N</b> FVSHESR                                     | 2539 |
| ESHARK          | -----YVR <b>N</b> FVSHENR                                     | 2540 |
| BHARK           | -----YVR <b>N</b> FVSHENR                                     | 2535 |
| XENOPUS         | -----IVR <b>N</b> FVSDETR                                     | 2551 |
| STERLET         | -----YVR <b>N</b> FVSHESR                                     | 2553 |
| GAR             | -----YVR <b>N</b> FVSHETR                                     | 2542 |
| HUMAN           | -----IIR <b>N</b> FVSHETR                                     | 2530 |
| PLATYPUS        | -----IVR <b>N</b> FVSNETR                                     | 2534 |
| TASDEVIL        | -----IIR <b>N</b> FVSHETR                                     | 2536 |
| COELACANTH      | -----YVR <b>N</b> FVSDENR                                     | 2541 |
| CAECILIAN       | -----TVR <b>N</b> FVSDETR                                     | 2543 |
| CANARY          | -----IVR <b>N</b> FVSHETR                                     | 2532 |
| OSTRICH         | -----IVR <b>N</b> FVSDETR                                     | 2502 |
| GECKO           | -----IVR <b>N</b> FVSDETR                                     | 2541 |
| TURTLE          | -----IVR <b>N</b> FVSDETR                                     | 2541 |
| ALLIGATOR       | -----VVR <b>N</b> FVSDETR                                     | 2499 |
| APLYSIA         | -----MCQ <b>N</b> FVSSNTR                                     | 2558 |
| TRICHOPLAX      | -----QLI <b>N</b> FVSNMNR                                     | 2518 |
| SOFTCORAL       | -----KLR <b>N</b> FVSDETR                                     | 2541 |
| STONYCORAL      | -----KLR <b>N</b> FVSEAR                                      | 2568 |
| SEA_ANEMONE     | -----KLR <b>N</b> FVSDETR                                     | 2530 |
| SEACUKE         | -----RIN <b>N</b> FVSHENR                                     | 2537 |
| LANCELET        | -----LVQ <b>N</b> FVSHETR                                     | 2565 |
| STARFISH        | -----RVS <b>N</b> FVSHETR                                     | 2576 |
| SEA_URCHIN      | -----RVS <b>N</b> FVSHETR                                     | 2562 |

Supplementary Figure 6 CLUSTAL OMEGA ALL PHYLA, EXPANDED

|                 |                                       |                        |      |
|-----------------|---------------------------------------|------------------------|------|
| PARAMECIUM      | QYQAGQ-QTTQIDRVISIMKD-I-----          | OPSK-PTLWLNKAVPLLLSQ   | 2498 |
| TETRAHYMENA     | ----D-SKTPYERLLYLQIE-I-----           | QPBO-ERLWLLAVPLIMCLG   | 2613 |
| STYLONCHEIA     | ----L-GLDNPORLLOIMND-I-----           | YQEE-ENIILNNSVFLIMQIT  | 2561 |
| APHANOMYCEsa    | ----L-PSSCDRLRALFGQ-L-----            | HQET-DEWVRVAVPLWLSL    | 2350 |
| APHANOMYCEse    | ----L-PSSCHDRLLALFGP-L-----           | YHDQT-FEDWVWVAKLWLSL   | 2292 |
| PYTHIUM         | ----L-PGSCDRVLELYQS-M-----            | APGV-EDVWLLAVNIMLGL    | 2498 |
| PLASMOPARA      | ----I-KKSCFRLLSIFGS-L-----            | HSSSEL-DENWLLAVNILLGLS | 2480 |
| BREMIA          | ----A-MNSCSDRLALIFGS-L-----           | SPDF-DDRWLLAVNILLIGMS  | 2465 |
| AEDDES          | ----F-PTDIDNRRFRVLSL-D-----           | EPSP-BAVYLGAVNILLDSN   | 2541 |
| MIDGE           | ----L-FKDFIGRFVLEK-F-----             | DPNI-GRFTHSGLLLDLS     | 2499 |
| BOMBUS          | ----L-TMTCR-ERLLENVDI-I-----          | TPNA-BKNTFP-HELLITDIL  | 2407 |
| ANT             | ----L-STEKSDRLALLAMHS-----            | RYTTE-VDAATVQLMMQLT    | 2442 |
| WHIPWORM        | ----L-SHRSAAQLNVL-G-L-----            | SRSP-KDGLGASVPMFYLS    | 2475 |
| TRICHIANELLA    | ----L-EISTSARLLNCLSQ-L-----           | TCMT-ESTLHSAVYVMLEL    | 2491 |
| BEETLE          | ----V-PHPVAVRFLYLKFN-F-----           | EEST-ENDFLGCYFLLERL    | 2386 |
| BARNACLE        | ----D---TTPRLSRVLT-D-M-----           | RPGL-BAVYLSVAVYLVGL    | 2421 |
| THRIP           | ----L-PQNVARLSTMPFL-L-----            | SPLT-BOYFLSVCPPLLAG    | 2444 |
| FLEA            | ----L-PKTYDAIFKYLMSN-L-----           | DEHL-EKNFIQNGVITLLQL   | 2438 |
| WHITEFLY        | ----L-PEKSIDRLRFVLSN-M-----           | IRDI-BYAVLGCNLPVLDON   | 2514 |
| TICK            | ----L-PLKARERLVALLAG-M-----           | SPET-EDHFLSSVPLLEL     | 2468 |
| TERMITE         | ----L-QRDASTSDRLFLITD-L-----          | CPAT-EHIFLGSVQYVLEAF   | 2518 |
| DAPHNIA         | ----L-PNGTMDRLAYVTD-F-----            | SPGA-RDYFLPGLHFLERL    | 2340 |
| OSTREOCOCCLUS   | ----L-YDSLFAKQDVLNL-I-----            | PKKV-BSLWLAARLMPAVD    | 2507 |
| STENTOR         | ----L-SLEAGHRLCQSEB-I-----            | TPPC-ERLWVLSHLLWKL     | 2271 |
| KLEBSORIDIUM    | ----L-SQEMPARLVELGR-L-----            | EPPE-EDKIQAGSBRMLMLG   | 2668 |
| CLUBMOSS        | ----L-PENMMERFSHVLSN-M-----           | HLPT-DHSHPTSNVLLKLL    | 2431 |
| MOSS            | ----L-SQDVRRHFLVLRN-I-----            | DPCL-BENNAQISVLLKLL    | 2554 |
| LIVERWORT       | ----L-SQNLRELSQMLNL-M-----            | DPSV-BENNAQISVLLKLL    | 2585 |
| LIGNANO         | ----L-PSEASARWFALLSR-CHGNNTADESDNRDEE | SAST-AVAVLPAFSAVLLDAG  | 2724 |
| COPEPOD         | ----S-SGDSLDRMRNLHQ-M-----            | YFHEH-FALLALFASILLDA   | 2450 |
| GLOBOSUM        | ----V-NQTVFDRAMDVCD-W-----            | IPEV-EDSFLKSVLPLDAG    | 2422 |
| PALUSTRIS       | ----MQQGDIFRTEFLIGS-L-----            | EPEV-BSSVLSVPLFLDVA    | 2482 |
| NEOCALLIMASTIX  | ----L-VDSVTFDFRVLNS-L-----            | SSET-SSTVLSVAVPILLLSL  | 2557 |
| GLOMUS          | ----L-SHNTFKLKLKELIGN-L-----          | STES-ENLFTNAGYVLLGEGS  | 2617 |
| LOBOSPOR        | ----L-PSNTFERLGEIIRN-M-----           | DVQA-EDIFLNAGYVMLLDR   | 2547 |
| SYNCEPHALASTRUM | ----L-KEEIFDVIGPST-A-----             | TPSV-BMMVLLGAYLLES     | 2527 |
| FUNCTIVORUM     | ----L-PEKSDRILYALQA-M-----            | TPPT-ETHVHSHLLMKL      | 2538 |
| HALBUM          | ----L-SLSVTVRLMQLFEK-M-----           | TKET-SRQLGCSLLLOL      | 2644 |
| DUPURPUREUM     | ----L-SSNSNRQLQFFTI-M-----            | SPET-BKNGRNCCLLLQL     | 2649 |
| PVIOLACEUM      | ----N-P-STIARLIQLFTT-M-----           | APET-BGKWSLSCCLLSL     | 2644 |
| AMPHIPOD        | ----L-SLSPHELIVFLRD-L-----            | SVSS-EDTFLHVGVHLLQIT   | 2561 |
| SHRIMP          | ----SMTLTCLLHILRK-M-----              | SPES-BDSFLQMIYVLEAF    | 2533 |
| MUDCRAB         | ----DMVLHDRVHLKLM-I-----              | SPET-BDSFLAMVILLEAF    | 2530 |
| TARDIGRADE      | ----M-SGSTFMRMLTIFTS-F-----           | ITPEL-ETAFLPAGHLLGL    | 2606 |
| HYDRA           | ----L-SENTIERFTEILT-F-----            | SSKT-EKETSISVNLILQL    | 2474 |
| SALPINGOECA     | ----L-ARNPVORFYDILTS-L-----           | VVEA-EEAVLQVAVNVLQLE   | 2584 |
| SPIDER          | ----L-PLGTVERLIALMKN-M-----           | SPVT-BESVLSVPLFLERL    | 2545 |
| LIMULUS         | ----L-PLGTVERLIALMKN-M-----           | ETL-LOSGVPLFERL        | 2586 |
| SCORPION        | ----L-PLGTVERLIALMKN-M-----           | LOSGVPLFERL            | 2571 |
| ROTIFFER        | ----M-PSNTDRMLLVEK-L-----             | SPKT-ERFVLSVPLLEK      | 2537 |
| CLIONA          | ----L-PITPIHKVSGIFOD-L-----           | DSSLESRRLCANGLLIQS     | 2580 |
| OCTOPUS         | ----L-PESTFDRVAVFQM-M-----            | SPGT-BHOFLYSSSLLLEM    | 2506 |
| CAPITELLA       | ----L-PGETVERIVAMLEA-M-----           | TPST-ELHVLAVNLLLEM     | 2561 |
| LIMPET          | ----L-PTGTLDRVAMLEA-M-----            | SPST-BQVLSVAVNLLLEM    | 2536 |
| SCALLOP         | ----L-PPDTLDRIVAMLEA-M-----           | APVT-BQVLSVAVNLLLEM    | 2594 |
| LINGULA         | ----L-PAGTLERMVAMLEA-M-----           | SPSV-BSSVLSVAVNLLLEM   | 2560 |
| OYSTER          | ----V-PGNTLDRIVAMLEA-M-----           | SPVT-BKQVLSVAVNLLLEM   | 2558 |
| SNAIL           | ----L-PDGTVDRMISILEA-M-----           | TPGS-BCNVLAVNLLLEM     | 2558 |
| SPONGE          | ----L-SSNTLDRITQLVLT-L-----           | SKKT-BTQFLYAVNLLLEL    | 2596 |
| PRIAPULA        | ----L-PTQTLPRLLAIQTL-L-----           | SPAT-BPHVLSVAVYVLLQL   | 2604 |
| DANTO           | ----L-PPETLERMLVVLKS-L-----           | SSRI-BEQVLSVAVDLLLEM   | 2576 |
| ESHARK          | ----L-PTGTHDRMLVILRS-M-----           | SNKI-BTQVLSVAVNLLLEM   | 2577 |
| BHARK           | ----L-PTGTHDRMLVILRS-M-----           | CNKI-BTQVLSVAVNLLLEM   | 2572 |
| XENOPUS         | ----L-PSNTTERMLAILSS-L-----           | SPKI-BKHVLSVAVNLLLEM   | 2588 |
| STERLET         | ----L-PTSTLERMLVILRS-L-----           | SSKI-BAHVLSVAVNLLLEM   | 2590 |
| GAR             | ----L-PTTTLERMLVILRS-L-----           | SSKI-BAQVLSVAVNLLLEM   | 2579 |
| HUMAN           | ----L-PSNTLDRLLA-LNS-L-----           | SPKI-BVHVLAVNLLLEM     | 2566 |
| PLATYPUS        | ----L-PSNTLDRMLA-LNS-F-----           | STKI-BMHVLSVAVNLLLEM   | 2570 |
| TASDEVIL        | ----L-PSNTLDRLLA-LRS-L-----           | STKI-BMHVLSVAVNLLLEM   | 2572 |
| COELACANTH      | ----L-PVGTDRMLVILKA-F-----            | CNKI-BTQVLSVAVNLLLEM   | 2578 |
| CABCILIAN       | ----L-PVVTTDRMLALINS-F-----           | SPKI-BSHVLSVAVNLLLEM   | 2580 |
| CANARY          | ----L-PTNTLDRMLSLSS-F-----            | STKI-BTHVLSVAVNLLLEM   | 2569 |
| OSTRICH         | ----L-PANLDRMLALINS-F-----            | STKI-BTQVLSVAVNLLLEM   | 2539 |
| GECKO           | ----L-PGNTLDRMLTHLSS-L-----           | STKT-BTQVLSVAVNLLLEM   | 2578 |
| TURTLE          | ----L-PTNTLDRMLALINS-L-----           | STKI-BTQVLSVAVNLLLEM   | 2578 |
| ALLIGATOR       | ----L-PTNTLDRMLALINS-F-----           | STKT-BTQVLSVAVNLLLEM   | 2536 |
| APLYSIA         | ----L-PESTLERVSMLEA-M-----            | SPST-BPHVLSVAVNLLQAM   | 2595 |
| TRICHOPLAX      | ----L-PSGTLERLSSVLYA-L-----           | SPNA-BSEVLSVAVNLLLEL   | 2555 |
| SOFTCORAL       | ----L-PNSTLERLVQVLRM-M-----           | SPIT-BSEVLSVAVNLLHL    | 2578 |
| STONYCORAL      | ----L-PGTLERLVEVLRM-L-----            | STTT-BIQVLSVAVNLLHL    | 2605 |
| SEA ANEMONE     | ----L-PNTLERLVDVLRM-M-----            | STNT-BQVLSVAVNLLHL     | 2567 |
| SEACUKE         | ----L-PVDTLERMVALLEC-M-----           | SPST-BDQVLSVAVNLLLEM   | 2574 |
| LANCELET        | ----L-PTGTLERIVAMLEC-M-----           | SPRT-BQVLSVAVNLLLEM    | 2602 |
| STARFISH        | ----L-PTGTLERIVAMLEC-M-----           | SPGT-BHOVLSVAVNLLLEM   | 2613 |
| SEA_URCHIN      | ----L-PKETLERLISMLGC-M-----           | SPGT-BNRVLSVAVNLLLEM   | 2599 |

Supplementary Figure 6 CLUSTAL OMEGA ALL PHYLA, EXPANDED

|                 |                                                           |      |
|-----------------|-----------------------------------------------------------|------|
| PARAMECIUM      | TKQED-DFMFKQLSDEAHYD-QE-FRNKKYIRQNNKQAGQFG-SFT----        | 2550 |
| TETRAHYMENA     | KRSDVD-KNLDQQLSKLAQYD-WD-FRDSHNRMLYNSQPLTLLTLGKVVNYKSG    | 2669 |
| STYLONCCHIA     | QSDFDN-RKIFDAPLDDKQFP-LE-I-NQVGH-QLNRSQPLTLLSQDQIFQASQ    | 2614 |
| APHANOMYCEsa    | TSDFDIA-NMLFPTLSSITQFEP-LE-IDTAVAR---RTQSILTLTFSQDAIALQSQ | 2403 |
| APHANOMYCEsa    | QASSDNK-QFLFSEPLSSSNFEQ-LA-IDTSVEH---RTQNLTLTFSQDAQALQSS  | 2345 |
| PHYTIUM         | RGSGFD-SLLFNLPLSDGE-VD-AE-IDAAVET---KNETM-TDLTVEADKFSFVS  | 2549 |
| PLASMOPARA      | KEDEFK-OPLFKISLGG-GE-YT-TQ-IDASVEA---KAQSM-ADLTVEADKFWKRL | 2531 |
| BREMIA          | ENKFEFK-OPLFASLSS-GE-SD-TQ-IDASVES---KQSM-LDLTVEADLASHS   | 2516 |
| AEDDES          | VKNPEFK-RRIHQEYVDVK-LRE-YS-IDTRVRQ---RNSFASAPLVEAQRLFTGG  | 2594 |
| MIDGE           | IRNPQFK-BRLIDYSTRQDQFPE-YP-IETKNSN---KRS-LPFLVQSKOKTLIAG  | 2550 |
| BOMBUS          | KKNNVT-QKIFL-GL-HQSS-VD-YK-IALLKPT---KNFQKAPLAPFLASQMMQT  | 2458 |
| ANT             | TKSDIT-SKMFDAIQSSTI-EK-YK-IDVSR---RNLSCITLHVQVLAASLVS     | 2495 |
| WHIPWORM        | TLDFDT-RLLVDRGLDQDN-ED-MH-VPTHHS---RYAQFVPTMMSKPFKIS      | 2527 |
| TRICHINELLA     | CHDFDT-RLVDRGLDQDN-ED-LP-ISTHQSS---RYASLEVAAMQVHSEVS-     | 2542 |
| BEEBLE          | KPADYS-KLLFEPDLDDN-ED-YY-LETNARA---RYLSV-VLFAEIVRFSMSL    | 2437 |
| BARNACLE        | AQDFDT-RKMDRDLDESE-EE-VA-IVSDRV---QSAAL-VLFSQPAAGG---     | 2469 |
| THRIP           | RSDFDT-SPLSHALDDCE-GE-MH-LTSTRV---KNAHM-ADLACILSGLISLQ    | 2495 |
| FLEA            | LQSDIQ-RNIFEPDLSDOT-FKS-YS-VEDNWHI---KNSAT-VLFAESFIPKMKSR | 2489 |
| WHITEFLY        | EQLSCR-ENIFDFDLANON-LFE-LP-INAAKRR---QHASF-VLFAADLQRSQSS  | 2565 |
| TICK            | SRDFDG-RKLFEPDLSDCR-FVD-YA-VTGSVRQ---RHAAM-TLFAELVSWQSS   | 2519 |
| TERMITE         | AGDFDN-QKIFEPDLKQD-FED-FR-MLLSARA---QNAVY-APMADTLASGLIQ   | 2569 |
| DAPHNIA         | TQSHLR-EPHIDQLDDVP-QS-FDLISLSQ---TVSTL-RPSVSNFG-----      | 2383 |
| OSTREOCOCCLUS   | QMDASG-ASLIDSLSDQV-TL-YK-VDTLRR---GASPMMLSSSSSLQKQEG      | 2559 |
| STENTOR         | ELDFDN-KVLDRLDGLDGL-QD-AQ-M-NSDFP---RSPFM-TLFAESFIPKMKSR  | 2321 |
| KLEBSORMIDIUM   | EADDFD-RPLDQDLDEP-FSE-YN-IDTAVAR---RSLPMTLFAELVSWQSS      | 2719 |
| CLUBMOSS        | QRVDR-RPINAALDDGE-QE-RQ-IDSSAVG---GSLPM-TLFAESGLSRSMKE    | 2482 |
| MOSS            | EDSVYK-RPISAPLSEV-QD-YT-INTSVG---ASLPM-TLFAESGLSDIQ       | 2605 |
| LIVERWORT       | EDSVYK-RPINAALSDGE-IHE-YT-INTSLG---GSLPM-TLFAESGLSDIQ     | 2636 |
| LIGNANO         | SSDFDR-RPMDRDLADCP-FRE-CR-IDADRR---RHGMLTLLLEMQQQQQK      | 2776 |
| COPEPOD         | ALSPNS-KKVDRLDGLDGH-FIE-YH-VDTNRM---QHSASLMMADLSSQSGS     | 2502 |
| GLOBOSUM        | RLDFMD-QKVDRLDGLDGR-NDKDIVDLLKKN---S-TSM-LDLFAADKASFSF    | 2474 |
| PALUSTRIS       | KEADYQ-TMFDLGLDQDNT-ADASLTDVSLG---T-GSM-QDLFAADKASFSF     | 2534 |
| NEOCALLIMASTIX  | ---SDLE-NLFLKNSLPMATL-GKNKK-FNMSF-I---S-SSM-DLFTSSNNKNNYN | 2604 |
| GLOMUS          | KKSHYN-KPILDQLDQSR-DENYDDITSTRV---N-NTM-TLFAELVSWQSS      | 2669 |
| LOBOSPOR        | KKDFDT-RPILDQLDQSR-DENYDDITSTRV---N-NTM-TLFAELVSWQSS      | 2599 |
| SYNCEPHALASTRUM | KRDFDG-SLLDQDLDEP-FDEHQNDITSTRV---S-TSM-TLFAELVSWQSS      | 2579 |
| FUNGIVORUM      | ARDFD-RLLDRLDGLDGP-FRE-YN-LETNH---SSM-TLFAELVSWQSS        | 2578 |
| HALBUM          | TRDFDT-KLLDQDLDEP-FRE-YN-LDASQ---RTSNM-NLFAESGLSDIQ       | 2695 |
| DPURPUREUM      | NRSDC-KVLDQDLDESE-KE-VQ-LDSSQH---RTLNM-NLFAESGLSDIQ       | 2700 |
| PVIOLACEUM      | NKDFDS-KLLDQDLDEP-FRE-VV-LDSSQN---RTSNM-NLFAESGLSDIQ      | 2695 |
| AMPHIPOD        | HSDFDY-RPLDQDLDEP-FRE-MK-VCPARA---RHASM-VLFAESGLSDIQ      | 2612 |
| SHRIMP          | RHSADY-QRILDQDLDEP-FRE-MK-VSTARA---RHASM-VLFAESGLSDIQ     | 2584 |
| MUDCRAB         | RYSDYQ-RDILDQDLDEP-FRE-MK-VSTARA---RHASM-VLFAESGLSDIQ     | 2581 |
| TARDIGRADE      | QKSVFRDKLRTALDQD-FK-QE-IATSWQ---RSTM-APLFAESGLSDIQ        | 2657 |
| HYDRA           | SLDFDS-LPLSMGLDDEKTS-SS-FD-VKFSQ---QKASL-TLFAELVSWQSS     | 2526 |
| SALPINGOECA     | KHDFDY-RELFARPLSSST-VRN-YR-VDASVRQ---RNAHM-TLFAELVSWQSS   | 2635 |
| SPIDER          | SYDFDK-RKIFEPDLSDQD-QA-YK-IQTSARK---RHAM-ADLFAELVSWQSS    | 2595 |
| LIMULUS         | SLDFDN-RKIFEPDLSDQD-QV-YN-VSSSRQ---RHAM-ADLFAELVSWQSS     | 2637 |
| SCORPION        | SKDFDN-RKIFEPDLSDQD-QN-YA-ISSSK---RHATL-TLFAELVSWQSS      | 2622 |
| ROTIFFER        | SKDFDN-RKIFEPDLSDQD-FRE-YN-LEADRR---RHSTM-TLFAELVSWQSS    | 2588 |
| CIONA           | SLDFDN-RKIFEPDLSDQD-QE-YE-IDNSRH---QYASL-VLFAESGLSDIQ     | 2631 |
| OCTOPOUS        | SKDFDK-RKIFEPDLSDQD-KE-YR-VKSHQH---RHSTM-TLFAELVSWQSS     | 2557 |
| CAPITELLA       | TKSDFN-RVLDLTLSEK-QD-FA-VSSTYQ---RHAAM-TLFAELVSWQSS       | 2612 |
| LIMPET          | TKSDYQ-REIFEPDLSDQD-QE-FS-VKSSKQ---RHAAM-TLFAELVSWQSS     | 2586 |
| SCALLOP         | SKSDYQ-QRIFEPDLSDQD-QD-YN-VKSSRQ---RHAM-TLFAELVSWQSS      | 2645 |
| LINGULA         | SKSDYN-REIFEPDLSDQD-FED-FV-VKSSKQ---RHAAM-TLFAELVSWQSS    | 2611 |
| OYSTER          | SKSDYQ-REMFEPDLSDQD-QD-YN-VKSSRQ---RHAAM-TLFAELVSWQSS     | 2609 |
| SNAIL           | SKSDYD-QRIFEPDLSDQD-FRD-YS-VQSSRQ---RHAM-TLFAELVSWQSS     | 2609 |
| SPONGE          | SRSDYN-RVLDLTLSEK-QD-YK-IDLSQ---RHLQD-TLFAELVSWQSS        | 2648 |
| PRIAPULA        | SLDFDK-RLVDRGLDQDN-QD-YN-IATSWQ---RHAAL-TLFAELVSWQSS      | 2655 |
| DANTIO          | SHDFDT-RMFEPLSDQD-QD-YT-IDSNRM---RSTVL-TLFAELVSWQSS       | 2627 |
| ESHARK          | SRDFDT-REMFEPDLSDQD-QD-YN-IDSSRQ---RSTVL-TLFAELVSWQSS     | 2628 |
| BHARK           | SHDFDS-REMFEPDLSDQD-QD-YS-IDSSHQ---RSTVL-TLFAELVSWQSS     | 2623 |
| XENOPUS         | SKDFDI-RKMFEPLSDQD-QD-YT-VDSSRF---RSSLV-TLFAELVSWQSS      | 2639 |
| STERLET         | SRDFDT-RDMFEPLSDQD-QD-YI-IDSNRH---RSTVL-TLFAELVSWQSS      | 2641 |
| GAR             | SRDFDS-RAIFEPDLSDQD-HD-YI-IDSSHH---RNTVL-TLFAELVSWQSS     | 2630 |
| HUMAN           | SMSDFP-NPMFEPLSDQD-QE-YT-IDSNRF---RSTVL-TLFAELVSWQSS      | 2617 |
| PLATYPUS        | SKSDYS-RHIFEPDLSDQD-QE-YT-IDSNRF---RSTVL-TLFAELVSWQSS     | 2621 |
| TASDEVIL        | SKSDYS-RHIFEPDLSDQD-QE-YS-IDSNRY---RSTVL-TLFAELVSWQSS     | 2623 |
| COELACANTH      | SRDFDT-REIFEPDLSDQD-QD-YI-IDSNRH---RSTVL-TLFAELVSWQSS     | 2629 |
| CAECILIAN       | SKSDYT-REMFEPDLSDQD-QD-YT-IDSNRY---RSTVL-TLFAELVSWQSS     | 2631 |
| CANARY          | SKSDYS-RKIFEPDLSDQD-QD-FV-VDSSRY---RSTVL-TLFAELVSWQSS     | 2620 |
| OSTRICH         | SKSDYS-RKMFEPLSDQD-QD-FV-IDSSRY---RSTVL-TLFAELVSWQSS      | 2590 |
| GECKO           | SKSDG-RKMFEPLSDQD-QE-FA-VDSSRF---RSTVL-TLFAELVSWQSS       | 2629 |
| TURTLE          | SKSDG-RKMFEPLSDQD-QD-FV-IDSNRY---RSTVL-TLFAELVSWQSS       | 2629 |
| ALLIGATOR       | SKSDYS-RKIFEPDLSDQD-QD-YI-IDSNRY---RSTVL-TLFAELVSWQSS     | 2587 |
| APLYSIA         | SKDFDT-RKVFEPDLSDQD-QD-YS-VQSSRQ---RHAM-TLFAELVSWQSS      | 2646 |
| TRICHOPLAX      | SRDFDK-LSIFEPDLSDQD-HD-YN-VNYSQY---RHAM-TLFAELVSWQSS      | 2606 |
| SOFTCORAL       | QSDFDG-RLIFEPDLSDQD-QD-YE-INFAYQ---RNTM-TLFAELVSWQSS      | 2629 |
| STONYCORAL      | SLDFDE-RLMFEPDLSDQD-FEE-YQ-IDYSQ---RHLAM-TLFAELVSWQSS     | 2656 |
| SEA ANEMONE     | SFDFDE-RLMFEPDLSDQD-FEE-YP-IDYSQ---RHVM-TLFAELVSWQSS      | 2618 |
| SEACUCIE        | SKSDYK-REMFEPDLSDQD-QD-IS-IDSSKQ---RHQINTLFAELVSWQSS      | 2626 |
| LANCELET        | SRDFDS-REIFEPDLSDQD-QD-VQ-IDHSKQ---RHAM-TLFAELVSWQSS      | 2653 |
| STARFISH        | SKSDYK-REIFEPDLSDQD-QD-VT-IDHSKQ---RHLAISTLFAELVSWQSS     | 2665 |
| SEA_URCHIN      | SKSDYK-REIFEPDLSDQD-EG-VQ-IDHSKQ---RHAALSTLFAELVSWQSS     | 2651 |

T2609 S2612

Supplementary Figure 6 CLUSTAL OMEGA ALL PHYLA, EXPANDED

|                 |                                                                                                                           |      |
|-----------------|---------------------------------------------------------------------------------------------------------------------------|------|
| PARAMECIUM      | SS <sup>SG</sup> -----I <sup>SG</sup> AIGA <sup>SG</sup>                                                                  | 2561 |
| TETRAHYMENA     | GFALPAPR-----RMYNITGV <sup>SG</sup> MPIQEVRATVY <sup>SG</sup> SDNS <sup>SG</sup> GEMVIPS <sup>SG</sup> DQAS <sup>SG</sup> | 2719 |
| SPYLONCHIA      | MQAKDQQLGVIKEVQNPENPDENIAGDVMTI-----DTTVSNRNRRPQIQAS <sup>SG</sup> IG <sup>SG</sup>                                       | 2668 |
| APHANOMYCEs     | PLDQP-----                                                                                                                | 2408 |
| APHANOMYCEse    | A-----                                                                                                                    | 2346 |
| PYTHIUM         | ATQMGs-----                                                                                                               | 2555 |
| PLASMOPARA      | QS <sup>RO</sup> OP-----                                                                                                  | 2537 |
| BREMIA          | ESRQQL-----                                                                                                               | 2522 |
| AEDES           | N-----G-----S-                                                                                                            | 2597 |
| MIDGE           | D-----G-----S-                                                                                                            | 2553 |
| BOMBUS          | FTOMPTFLS-----YMSF-----DSTY                                                                                               | 2475 |
| ANT             | SFESVD-----YNDLYGTCLT-----PTFSY                                                                                           | 2517 |
| WHIPWORM        | SMLTPOSVR-----E-----                                                                                                      | 2537 |
| TRICHINELLA     | KFI---SR-----K-----                                                                                                       | 2548 |
| BEEBLE          | QTF-----K-----                                                                                                            | 2440 |
| BARNACLE        | -----                                                                                                                     | 2469 |
| THRIP           | DSSSSL-----                                                                                                               | 2501 |
| FLEA            | STATRS <sup>SG</sup> V-----YIGSQT-----IAAY                                                                                | 2508 |
| WHITEFLY        | SFSD-----                                                                                                                 | 2569 |
| TICK            | STTT <sup>SG</sup> STT-----                                                                                               | 2528 |
| TERMITE         | S <sup>SG</sup> ---LSG-----                                                                                               | 2574 |
| DAPHNIA         | -----RG-----                                                                                                              | 2385 |
| OSTREOCOCCUS    | V-----                                                                                                                    | 2560 |
| STENTOR         | -----                                                                                                                     | 2321 |
| KLEBSORMIIDIUM  | CS <sup>SG</sup> APAP <sup>SG</sup> -----T-----QTGGR                                                                      | 2734 |
| CLUBMOSS        | SLA-----E-----ANASL                                                                                                       | 2492 |
| MOSS            | MHGE-----D-----RDGEF                                                                                                      | 2615 |
| LIVERWORT       | SR <sup>SG</sup> AVLAS-----Q-----NSKED                                                                                    | 2651 |
| LIGNANO         | ASDV-----                                                                                                                 | 2780 |
| COPEPOD         | <sup>SG</sup> TS-----                                                                                                     | 2507 |
| GLOBOSUM        | -----                                                                                                                     | 2474 |
| PALUSTRIS       | -----                                                                                                                     | 2534 |
| NEOCALLIMASTIX  | -----                                                                                                                     | 2604 |
| GLOMUS          | -----                                                                                                                     | 2669 |
| LOBOSPOR        | SDS-----                                                                                                                  | 2602 |
| SYNCEPHALASTRUM | ED-----                                                                                                                   | 2581 |
| FUNGIIVORUM     | -----                                                                                                                     | 2578 |
| HALBUM          | --L-P-----                                                                                                                | 2697 |
| DPURPUREUM      | A--S-----                                                                                                                 | 2702 |
| PVIOLACEUM      | <sup>SG</sup> ISS-----                                                                                                    | 2700 |
| AMPHIPOD        | PSL <sup>SG</sup> LVAL-----T-----Q-GGE                                                                                    | 2626 |
| SHRIMP          | ---NSLLSY-----T-----Q-GSD                                                                                                 | 2595 |
| MUDCRAB         | ---RSL-----T-----Q-SNE                                                                                                    | 2589 |
| TARDIGRADE      | ASYGSG-S-----                                                                                                             | 2664 |
| HYDRA           | YSR <sup>SG</sup> CG-N-----E-----                                                                                         | 2534 |
| SALPINGOECA     | EGEG-----                                                                                                                 | 2639 |
| SPIDER          | SLMSLD-A-----S-----                                                                                                       | 2603 |
| LIMULUS         | SLQTET-S-----S-----                                                                                                       | 2645 |
| SCORPION        | DTSVKN-----                                                                                                               | 2628 |
| ROTIIFER        | -----                                                                                                                     | 2588 |
| CIONA           | TSR-----                                                                                                                  | 2634 |
| OCTOPUS         | DDI-----                                                                                                                  | 2560 |
| CAPITELLA       | P-----                                                                                                                    | 2613 |
| LIMPET          | ME-----                                                                                                                   | 2588 |
| SCALLOP         | DS-----                                                                                                                   | 2647 |
| LINGULA         | S-----                                                                                                                    | 2613 |
| OYSTER          | DD-----                                                                                                                   | 2611 |
| SNAIL           | VE-----                                                                                                                   | 2611 |
| SPONGE          | T-----                                                                                                                    | 2649 |
| PRIAPULA        | <sup>SG</sup> OTV-----                                                                                                    | 2659 |
| DANTO           | AG <sup>SG</sup> -----                                                                                                    | 2631 |
| ESHARK          | <sup>SG</sup> SEG-S-----                                                                                                  | 2635 |
| BHARK           | RS <sup>SG</sup> SEA-S-----                                                                                               | 2630 |
| XENOPUS         | SRAQ-G-T-----                                                                                                             | 2645 |
| STERLET         | YH <sup>SG</sup> D-----                                                                                                   | 2646 |
| GAR             | YQSRGG-S-----                                                                                                             | 2637 |
| HUMAN           | TR <sup>SG</sup> EG-S-----                                                                                                | 2624 |
| PLATYPUS        | SR <sup>SG</sup> EG-L-----                                                                                                | 2628 |
| TASDEVIL        | NR <sup>SG</sup> EG-S-----                                                                                                | 2630 |
| COELACANTH      | FR <sup>SG</sup> EG-P-----                                                                                                | 2636 |
| CAECILIAN       | YR <sup>SG</sup> EG-S-----                                                                                                | 2638 |
| CANARY          | NL <sup>SG</sup> ER-S-----                                                                                                | 2627 |
| OSTRICH         | SL <sup>SG</sup> QER-S-----                                                                                               | 2597 |
| GECKO           | HR <sup>SG</sup> PGG-S-----                                                                                               | 2636 |
| TURTLE          | NR <sup>SG</sup> EG-S-----                                                                                                | 2636 |
| ALLIGATOR       | KR <sup>SG</sup> EG-S-----                                                                                                | 2594 |
| APLYSIA         | D-----                                                                                                                    | 2647 |
| TRICHOPLAX      | ASFS-----L-----                                                                                                           | 2611 |
| SOFTCORAL       | SSFG-----S-----                                                                                                           | 2634 |
| STONYCORAL      | TP <sup>SG</sup> E-----S-----                                                                                             | 2662 |
| SEA_ANEMONE     | <sup>SG</sup> -----                                                                                                       | 2619 |
| SEACUKE         | LG <sup>SG</sup> SP-P-----                                                                                                | 2632 |
| LANCELET        | <sup>SG</sup> SA-----Q-SLS                                                                                                | 2661 |
| STARFISH        | <sup>SG</sup> SP-PD-----S-----                                                                                            | 2674 |
| SEA_URCHIN      | I-RGSP-S <sup>SG</sup> -----S-MTS                                                                                         | 2663 |

T2620

Supplementary Figure 6 CLUSTAL OMEGA ALL PHYLA, EXPANDED

|                 |                                                       |      |
|-----------------|-------------------------------------------------------|------|
| PARAMECIUM      | ---NNP---GNKNPVNKKQ---L---IRA---EV-----               | 2583 |
| TETRAHYMENA     | ---MNQLEE---KQIYQDQ---M---KRLVNP---SQO-----           | 2751 |
| STYLNONCHIA     | ---SVVEIIS---AQDGNFVRA---V---PVF---SDVSSL-----        | 2709 |
| APHANOMYCESa    | -----LERAGLVKATC---D---RVWSQTC---S-----               | 2424 |
| APHANOMYCESa    | -----IFEGGVKATC---D---PIWSQTC---A-----                | 2362 |
| PYTHIUM         | -----LTEASIQ---SC---G---QOWGS---TCSLD-----            | 2581 |
| PLASMOPARA      | -----SCRNNALSE---DKSLRD---TMQ---SC-----               | 2554 |
| BREMIA          | -----NSSTKYSA---SOPLES---KMQ---SC-----                | 2537 |
| AEDDES          | -----QMERLIKATOFGE---E-G-GLFEP---LDPSIIT-----         | 2629 |
| MIDGE           | -----YYDQMVRA---LGN---D-T-MMFTP---DPMILT-----         | 2585 |
| BOMBUS          | -----T-TSHNSQLMLQATC---D-LDFEPT---YVND---T-----       | 2506 |
| ANT             | -----P-RLIHGGLKLRATC---D-LDFEPT---LDD---N-----        | 2548 |
| WHIPWORM        | -----TALTGLSRLEPPSTSA-W-PLLTP---AEBGVPP-----          | 2574 |
| TRICHINELLA     | -----RKMPYGR---VSTESTA-W-PGFTP---LITDLKK-----         | 2585 |
| BEEBLE          | -----DSKLRQC---T-S-LEFAP---TVVR---S-----              | 2467 |
| BARNACLE        | -----PLPALLRATC---R-S-LAFTP---RORSA---A-----          | 2499 |
| THRIP           | -----DTSYPLLATC---N-S-LIFQP---ADFP---D-----           | 2531 |
| FLEA            | -----FKSNIKIPMIQATC---QE-Q-LQFAP---FDLQ---N-----      | 2543 |
| WHITEFLY        | -----SAQVRA---S-LEFAP---VAVSD---A-----                | 2596 |
| TICK            | -----TSATTPDGPMLRATC---A-E-LQFTP---RGT---S-----       | 2563 |
| TERMITE         | -----TGEHTGAGPLLRATC---A-S-LAFQP---LIEQS---G-----     | 2608 |
| DAPHNIA         | -----FSYGTIQPYLRATC---SSSSAAFS---S---R-----           | 2416 |
| OSTREOCOCCUS    | -----DALK---Q-S-VLLAH---QLDADP---LPAATLSY-----        | 2587 |
| STENTOR         | -----KAK---K-S-SQFAM---PORTSRIR-----HL-----           | 2342 |
| KLEBSORMIIDIUM  | -----GQOPLPGMIRATC---G---PQSLG---LDD---AP-----        | 2765 |
| CLUBMOSS        | -----ALVNHGRGLIRATC---S---YTPSM---L---E-----          | 2517 |
| MOSS            | -----DGATHRRPMMIRATC---T-PSLSQ---VITQGG-----          | 2646 |
| LIVERWORT       | -----DEMTPROAGMIRATC---T---ATLSQ---DITLSSY-----       | 2680 |
| LIGNANO         | -----EPGTLRQLQ---D-G-DGATA---VAMGTDASMLPLRATAVGPMEFAT | 2822 |
| COPEPOD         | -----SLGMLRATC---A-T-MEFSQ---CAQGNLN-----             | 2536 |
| GLOBOSUM        | -----DEREGGIRATC---E---MVWTP---DQVDAKT-----           | 2504 |
| PALUSTRIS       | -----TOAVGPIRATC---Q---VQWTP---LQW---IGP-----         | 2566 |
| NEOCALLIMASTIX  | -----MYS---K-E-LSFTP---LIEMGTF-----                   | 2631 |
| GLOMUS          | -----LKRQEGVLVRATC---E-D-LAFSL---LGGPNAD-----         | 2704 |
| LOBOSPOR        | -----WTLGEDLRATC---S-T-FEFSM---LDGGAPA-----           | 2637 |
| SYNCEPHALASTRUM | -----L---ELQLRR---Q-E-LAFSK---LDGYSGD-----            | 2613 |
| FUNCTIVORUM     | -----FPFPRVTL---A---PEFRVATVLDDE-----                 | 2606 |
| HALBUM          | -----TPDGDNFGRPRATC---L---PMFSL---SSFS-----           | 2724 |
| DPURPUREUM      | -----SNQMDIDEIRATC---A---PQFTL---DPTAFS-----          | 2729 |
| PVIOLACEUM      | -----SMMMDQDEIRATC---T---PQFTL---DPTAFR-----          | 2727 |
| AMPHIPOD        | -----VGHT---LAALAA---Q---RQFTP---CAAA---PE-----       | 2658 |
| SHRIMP          | -----TNMETDGPAGVQATC---A---NVFSATC-----               | 2626 |
| MUDCRAB         | -----AEDDVGPRGVAATC---A---NVFSATC-----                | 2620 |
| TARDIGRADE      | -----G-SRN-G---A-A-PIFTP---CALAGP-----                | 2683 |
| HYDRA           | -----EVVPTKLVQVVRATC---K-K-LDFSQ---LHQ-----           | 2566 |
| SALPINGOECA     | -----EDEDPSGVRATC---A-S-LAFTP---MASLT-G-----          | 2673 |
| SPIDER          | -----DLTSFRHDLKLRATC---V-N-IDFPE---LDVNDVD-----       | 2641 |
| LIMULUS         | -----NTHGTSGGQHLRATC---A-N-LQFTA---LDD---PG-----      | 2680 |
| SCORPION        | -----IDEQIRSNV---D-V-REFDP---L---DQ-----              | 2656 |
| ROTIFFER        | -----VLRHNLRA---Q-T-LQFPL---K-----                    | 2613 |
| CIONA           | -----KQNPRIILATC---Q-D-LQFTA---LVE-----               | 2663 |
| OCTOPUS         | -----KTENMGADELRATC---G-N-QQFTP---LDD-----            | 2589 |
| CAPITELLA       | -----DAGLSTGQLRATC---D-A-AQFTQ---CAD---G-----         | 2646 |
| LIMPET          | -----GVEDSLDGGVRATC---D-V---QFTAT---CDA---G-----      | 2620 |
| SCALLOP         | -----PPSDSLDGGIQATA---D-V-QQFTA---CDD---G-----        | 2679 |
| LINGULA         | -----GSFDDSPVGVRA---E-I-QQFTP---CG---A-----           | 2645 |
| OYSTER          | -----ESYSGEIRATC---D-A-QQFTA---LDD---A-----           | 2640 |
| SNAIL           | -----DSLRRGVRA---D-V-EQFTA---LDET---G-----            | 2641 |
| SPONGE          | -----GSIQTGLRATC---QQS-LAFTP---CG-----                | 2679 |
| PRIAPULA        | -----AAAMQTEIRATC---V-V-PEFTA---LDDV---A-----         | 2692 |
| DANTO           | -----AATVRGQIRATC---T-S-LEFSQ---LAPG---A-----         | 2664 |
| ESHARK          | -----LTPAQITIGLVRATC---T-H-YEFTP---LRI---P-----       | 2668 |
| BHARK           | -----TYDQNTIGGIRATC---T-H-YEFTP---LRI---S-----        | 2663 |
| XENOPUS         | -----IEADEPIGGQLRATC---Q-H-YQFTP---LRI---I-----       | 2679 |
| STERLET         | -----SPQGTIGGVRATC---A-Q-LEFTQ---LCA---A-----         | 2679 |
| GAR             | -----ASAQSLGGQLRATC---S-T-LEFTQ---LDD---P-----        | 2671 |
| HUMAN           | -----LSARWPVAGVIRATC---Q-Q-HDFTL---LCT---A-----       | 2658 |
| PLATYPUS        | -----LPGQGLLLGQLRATC---Q-YEFTP---LRI---T-----         | 2661 |
| TASDEVIL        | -----LSLPRLLTKQIRATC---Q-Q-YEFTP---LRI---I-----       | 2664 |
| COELACANTH      | -----EQVQSLGGQVRATC---V-Q-FDFTP---LRI---T-----        | 2670 |
| CAECILIAN       | -----FPAQSSLLGGQVRATC---Q-Q-YEFTP---LRI---I-----      | 2672 |
| CANARY          | -----LSPSGSVRQVRA---R-Q-YEFTP---LRI---G-----          | 2661 |
| OSTRICH         | -----PSTSGSGGRVRA---Q-Q-YEFTP---LRI---I-----          | 2631 |
| GECKO           | -----LTHGSMGGQLRATC---Q-Q-YEFTP---LRI---I-----        | 2670 |
| TURTLE          | -----LSTQSLGGQVRATC---Q-Q-YEFTP---LRI---V-----        | 2670 |
| ALLIGATOR       | -----LSTPGSQAGVRA---Q-Q-YEFTP---LRI---M-----          | 2628 |
| APLYSIA         | -----ESDQLDGLRATC---D-V-QQFTA---LDDAT-----            | 2680 |
| TRICHOPLAX      | -----SGSSSTDEHLLRATC---STN-LQFTP---LDDT-----          | 2643 |
| SOFTCORAL       | -----HSMIDTDGGQLRATC---N-PQFSMT---TAGATG-----         | 2671 |
| STONYCORAL      | -----MSVDGSPGLRATC---N-LQFTP---LDD---Q-----           | 2693 |
| SEA_ANEMONE     | -----G-GSLEPGALRATC---L-R-VEFSP---LMD---Q-----        | 2651 |
| SEACUCU         | -----ETLGGQVRATC---D-G-QQFTA---LDDAARA-----           | 2666 |
| LANCELET        | -----QGGQDTLGGQLRATC---D-V-LQFTA---LDD---ASA-----     | 2696 |
| STARFISH        | -----SLSRGEIRATC---D-A-HQFTA---LDDAVALA-----          | 2708 |
| SEA_URCHIN      | -----SGMSMGGGQLRATC---A-T-QNFTA---LDDAAS-----         | 2700 |

T2638

T2647

Supplementary Figure 6 CLUSTAL OMEGA ALL PHYLA, EXPANDED

|                 |                           |            |                                 |      |
|-----------------|---------------------------|------------|---------------------------------|------|
| PARAMECIUM      |                           |            |                                 | 2583 |
| TETRAHYMENA     | -S                        | -NRNP      | -YTFNQSQLFPDNKMSISEENE          | 2778 |
| STYLONCCHIA     | -N                        | -NRSSP     | -PITDGISASFYEINKFNKRPNQG        | 2739 |
| APHANOMYCEsa    |                           |            | -QQFOSSQGAATGGS                 | 2442 |
| APHANOMYCEse    |                           |            | -QHFTQSQVESSAPN                 | 2380 |
| PYTHIUM         |                           |            | -GSAS-SSQLISSSQAFSGSSS          | 2601 |
| PLASMOPARA      |                           |            | -LIFSPOASVRLKS                  | 2572 |
| BREMIA          |                           |            | -LYSNALTSRGSRL                  | 2555 |
| AEDES           | -SF                       |            | -TLP-TQHSLMFEINPPILD            | 2649 |
| MIDGE           | -SF                       |            | -NFQQTQNSLFFNLKPOYLD            | 2606 |
| BOMBUS          | -I                        |            |                                 | 2507 |
| ANT             | -TT                       |            |                                 | 2550 |
| WHIPWORM        | -ETF                      | -GS        | -AMD-ES                         | 2584 |
| TRICHINELLA     | -DTF                      | -EL        | -DLD-ES                         | 2595 |
| BEEBLE          |                           |            | -TMS--ESSLPFK                   | 2477 |
| BARNACLE        | -L                        |            | -TQTAAAP--AGT                   | 2510 |
| THRIP           | -A                        | -TKLKSS    | -LSR--SSFLFSQDTSQSSKTALRG       | 2560 |
| FLEA            |                           |            | -SH-                            | 2545 |
| WHITEFLY        | -PQVTSLLNDS               |            | -GVP--SSFDVNTSKFKS--RSF         | 2625 |
| TICK            | -G                        | -SF        | -NW--LTQSTLES--NLS              | 2579 |
| TERMITE         | -P                        | -SF        | -SLS--SLLFTTGSFEN--QRK          | 2630 |
| DAPHNIA         | -LMAE-TLSTEPSS            |            | -KPV--TSKAAM                    | 2434 |
| OSTREOCOCCLUS   |                           |            | -KRL                            | 2593 |
| STENTOR         |                           |            |                                 | 2342 |
| KLEBSORMIDIUM   |                           |            | -SQGDFVSS--SLMATQSGGFRGGFSQVGLT | 2793 |
| CLUMBOSS        |                           |            | -GSD--EP                        | 2522 |
| MOSS            | -S                        | -S         | -TQGVNGSVLYLSQ--RP              | 2664 |
| LIVERWORT       |                           |            | -PLASQESSLPAMSR--KS             | 2696 |
| LIGNANO         | QLHPSAAT                  | -AGLLADSQ  | -DLSVSTSLFRSSGGGGGAG--LEV       | 2862 |
| COPEPOD         | -PNLS                     |            | -SNGTPMS                        | 2547 |
| GLOBOSUM        | -SRLQ-S                   |            | -EFDSQ--TQS                     | 2517 |
| PALUSTRIS       | -SGSE-S                   |            | -EPTSA--PTS                     | 2579 |
| NEOCALLIMASTIX  | -SQST-LI                  |            | -VNFEINLNININTIKSSNKNSISL-      | 2660 |
| GLOMUS          | -SLTQ-S                   |            | -NLLFSQSFIPSLPRS                | 2724 |
| LOBOSPOR        | -ANPS-S                   |            | -TLMFRNT-PVQGA                  | 2655 |
| SYNCEPHALASTRUM | -PTPE-SL                  |            | -SNVLLPTSSAAQASQOAT             | 2637 |
| FUNCTIVORUM     | -TPGS-LSSLFGAS            | -MSKQ      | -RPA--VS                        | 2627 |
| HALBUM          | -YPSG-SSSSYSEL            | -SSSQEQ    | -SSSATTSTTFSVGSAPPDSQS          | 2763 |
| DPURPUREUM      | -YPSS-SQESSNAS            | -SQQS      | -SQ--SS                         | 2749 |
| PVIOLACEUM      | -YPSS-NSQSVDS             | -VTMSVS    | -SSSSQGSQ--RS                   | 2755 |
| AMPHIPOD        | -GTDA-SMQEVS              | -FTQLQDKAN | -TVSQGSAGLVFSLKT--NQAR          | 2697 |
| SHRIMP          | -VTDS-TFDTTLA             | -DMEYEATHA | -PTQGSGLIFNVGASGQKDRR           | 2668 |
| MUDCRAB         | -VTES-TFDTSLA             | -DMEYAATHA | -PIHGSASGPMFNVGAHGKNNM          | 2662 |
| TARDIGRADE      | -ANDTLAVAGF               | -TYS       | -SQFAESLLIDLRRGLITR             | 2715 |
| HYDRA           | -MSPTIQTPO-E              | -MLPG      | -LNIQTNSKNRK                    | 2592 |
| SALPINGOECA     | -EPGGISGQTLTHT            | -QY        | -TAAQVLLFERRNRGANV              | 2707 |
| SPIDER          | -LTER-SLDTFAPQMSSGDSGYSSF |            | -TNSPVKTHLFALKKNK               | 2681 |
| LIMULUS         | -LTQS-SIDTMEQWGSLEAMDAS   |            | -MGSSGSLFFTIGRKTAPAS            | 2722 |
| SCORPION        | -LTQT-SIDTLGDWGS          |            | -TSSSLLFTIGSDTKKIPN             | 2690 |
| ROTIIFER        | -LTQS-SIDTPTT             | -NL        | -IDTKSLLFKTES                   | 2640 |
| CLIONA          | -MTGS-SLDTFSSL            | -AV        | -GDHQKSSLLASSITSPASYRRLGRKL     | 2703 |
| OCTOPIUS        | -LTQS-SLSSSMEV            | -DSV       | -DSGIQSSLLTVSGKATAVSQ           | 2624 |
| CAPITTELLA      | -LTQS-SLDTF-S             | -DSQNLTL   | -ATQSESSLMTFVGSRRKSSK           | 2684 |
| LIMPET          | -LTQS-SLDTY-G             | -DYGSMS    | -SSETPSSLLFVSGTSGSQSTNKR        | 2659 |
| SCALLOP         | -LTQS-SLDTF-T             | -DYGTVG    | -SEPQSALLFTVGSMEASARIGRP        | 2718 |
| LINGULA         | -LTQS-SLDTF-A             | -EYSTQS    | -METQSSLLFVNGTANENQTPKKK        | 2684 |
| OYSTER          | -LTQS-SLDTF-T             | -DYSTVG    | -SETSSSLLFTVGTQDMALRTGLK        | 2679 |
| SNAIL           | -LTQS-SLDTF-A             | -DASLME    | -TNSLSSLLFTVGSSSKADSKTRVATR     | 2684 |
| SPONGE          | -MTPSAQSV                 |            | -DYSVPSFTVGATPTSDSSLLFTRPTMRPLK | 2718 |
| PRIAPULA        | -LTQSSSIDTFADQ            | -SLSSVSS   | -ISSSS-SSSPYS-SPSADHHE          | 2731 |
| DANTIO          | -LTGS-SVDTL-A             | -DYSLSS    | -DSLSSLLVFDKRRSERPO             | 2701 |
| ESHARK          | -LTGN-SLDTF-A             | -EYSLPSL   | -ASEPSSSLLVFSRWBELR             | 2709 |
| BSHARK          | -LTGS-SLDTF-A             | -EYTLFPS   | -ESASSSLLVFSKRSEKSRQ            | 2701 |
| XENOPUS         | -LTGS-SMDTL-A             | -DYSVES    | -PESLPSALLPVNKRNRNVR            | 2718 |
| STERLET         | -LTGG-SIDTL-S             | -EYSLPSS   | -ADSVSSSLLVFGKRGKDSQ            | 2719 |
| GAR             | -LTGS-SVDTL-S             | -EYALPAT   | -SDLSLSSLLVFGKWKQKQQQ-QQRGPK    | 2715 |
| HUMAN           | -LTGS-SVDPL-V             | -DHTSPSS   | -DSLLFAHKRSERLQR                | 2693 |
| PLATYPUS        | -LTGS-SVDTF-T             | -DYPGPTS   | -SESLS-TLLFTHKRSRTQK            | 2700 |
| TASDEVIL        | -LTGS-SIDTL-A             | -DYTIPSL   | -SESLSSSLLVFKHRTDKPQR           | 2704 |
| COELACANTH      | -LTGS-SVDTF-A             | -EYSLPSS   | -SESLASSLLAYGKRSEKSRQ           | 2710 |
| CAECILIAN       | -LTGN-SIDTL-A             | -EYGVPS    | -SESLSSSLLVFSKRSKSR             | 2712 |
| CANARY          | -LTGS-SIDTL-A             | -EYAVPSS   | -SESLSSSMLLVSKRSEKFKQ           | 2701 |
| OSTRICH         | -LTGN-SIDTL-A             | -EYVPSF    | -SESLSSSMLLVSKRSEKFKQ           | 2671 |
| GECKO           | -LTGN-SVDTF-A             | -EYVTS     | -SESLSSSMLLVTHKHAQSR            | 2710 |
| TURTLE          | -LTGS-SIDTL-A             | -EYVPS     | -SESLSSSMLLVFSKRSKSR            | 2710 |
| ALLIGATOR       | -LTGS-SIDTL-T             | -EYTVPS    | -SESLSSSMLLVNKRSEKSRQ           | 2668 |
| APLYSIA         | -LTQS-SLDTFTDT            | -AVI       | -GGDQLLFRDRRQGGQSAKGSLLK        | 2722 |
| TRICHOPLAX      | -LDPS-SVDKSIQSYAFLQQLSST  |            | -SSETSTLLFLSKSPRO               | 2690 |
| SOFTCORAL       | -LNPS-SLDTSS              | -SASFVS    | -G-SQPSSLLFKSNPNMRRFK           | 2710 |
| STONYCORAL      | -LNPT-QESNLQPS            | -QSFAMA    | -STQTQSLFFSTQSHKR               | 2733 |
| SEA ANEMONE     | -LNPS-SQADS-V             | -QSFVVG    | -SSEAQSSLLFGTKP--RA--SQRSL      | 2688 |
| SEACUCIE        | -LTG-SQDTE-A              | -SYSASL    | -GTESSSSLLFTIGTKQKAVLGAKIKV     | 2709 |
| LANCELET        | -LTQS-SLDTF-A             | -DYSVPL    | -GTETQSSLLFTDASKKAVARR          | 2736 |
| STARFISH        | -LTG-SQDTE-A              | -DYSTSS    | -A-SDQSSLLFTLGASKPKM-GRGROGVSK  | 2749 |
| SEA_URCHIN      | -LTG-SQDTE-A              | -DYSSSS    | -S-ASESSSLLFTMGSLPKRTAQGFRGVK   | 2741 |

Supplementary Figure 6 CLUSTAL OMEGA ALL PHYLA, EXPANDED

|                 |                                                                                                                    |      |
|-----------------|--------------------------------------------------------------------------------------------------------------------|------|
| PARAMECIUM      | -----IQOS-----Q--YFDEEGFRIPM--KS                                                                                   | 2601 |
| TETRAHYMENA     | -----DDNEEG--E--FKKIDLFGDTIQEK                                                                                     | 2801 |
| STYLONCCHIA     | -----QVVNLRIGAQSSQDK--V--ADDDGFIAIPVAKRK                                                                           | 2770 |
| APHANOMYCEsa    | -----I-----QTT--SAGLAPRT                                                                                           | 2454 |
| APHANOMYCEse    | -----S-----SSH--RRDI--T                                                                                            | 2389 |
| PYTHIUM         | -----S-QF--A-----ASSQFDGSPQKGRK                                                                                    | 2620 |
| PLASMOPARA      | -----SYRQS--I-----VDPFTD--LRO                                                                                      | 2587 |
| BREMIA          | -----SYSQS--S-----GRTNVA--PGO                                                                                      | 2570 |
| AEDDES          | RRSRRTTPQIM-----R--TPTTRSAQSYDSLK                                                                                  | 2673 |
| MIDGE           | MRSSFTPNSAADDDEIEA-----RIARKKPKRHDFAFDYLR                                                                          | 2643 |
| BOMBUS          | -----NLGE--DNTFFV-----PKVPOPAYNKLK                                                                                 | 2529 |
| ANT             | -----FNILSYVIGF--DRTTQS-----TSRSLQVAPKRSF                                                                          | 2582 |
| WHIPWORM        | -----SGVLEMDAAL--EKH--IAGRRLLPQHRAIP--SSICDF--KLLK                                                                 | 2623 |
| TRICHOINELLA    | -----DSSNLTIVIL--DKI--LQD--IKKPKSSRVKXVDD--LGLQLOFLK                                                               | 2634 |
| BEEBLE          | -----P--E--EKS--FV-----DPSINLSYKYRIPK                                                                              | 2500 |
| BARNACLE        | GTPSGARLRVYTD-----V--DG--GCGAGADA--LSRML                                                                           | 2540 |
| THRIP           | SFKOGANFGSLLQLSE-----V--PT--EHEKSPKRTK                                                                             | 2589 |
| FLEA            | -----D--TLNLYMFDADN--EEI--KVE--DLGSQQLKDSFLKLR                                                                     | 2578 |
| WHITEFLY        | MRKFKPQSTDIAN-----VG--HVISSQH--KSY--RLK                                                                            | 2655 |
| TICK            | GARRRSLSILSPAPVO--EIV--LLG--ASQTSQSKSLGFLR                                                                         | 2617 |
| TERMITE         | SYKMGPGFGSSKLPQIP--E--VS--D--D--VDSRS--DRLAPNLH                                                                    | 2665 |
| DAPHNIA         | -----KKT--T-----D--V--E--K--E--TF--K--S--P--L--K--S--W                                                             | 2453 |
| OSTREOCOCCLUS   | PKSAYAKDVS-----S--T--L--H--T--S--F--S--A--V--I                                                                     | 2616 |
| STENTOR         | -----QGVQQLG--G-----R--G--S--Q--S--I--D--R--R                                                                      | 2354 |
| KLEBSORIDIUM    | -----GQTONAA--D-----G--S--O--N--V--A--V--D--P--V--T--K--N                                                          | 2545 |
| CLUBMOSS        | -----GGAGY--KK--T-----G--L--E--A--S--M--D--P--A--L--H--L--R                                                        | 2688 |
| LIVERWORT       | -----S--V--T--H--T--Q--V--T-----S--O--T--G--S--T--D--S--L--P--G--L--R                                              | 2719 |
| LIGNANO         | SAAGLAGYH--TALG--SDA-----N--P--M--A--G--Q--A--Q--L--H--R--L--R                                                     | 2894 |
| COPEPOD         | ARPGPGYRRS-----T--T--P--M--V--G--S--L--V--A--G                                                                     | 2569 |
| GLOBOSUM        | -----S--T--Q-----P--F--I--D--R--R--T--L--V--R--R--                                                                 | 2531 |
| PALUSTRIS       | -----T--Q--F--E--G-----P--O--A--D--R--A--F--T--S--Y--T--R--R--                                                     | 2598 |
| NEOCALLIMASTIX  | -----N--D--N--D--K--T--I--S--N-----S--O--K--D--N--R--L--L--V--P--O--R--R--R                                        | 2686 |
| GLOMUS          | -----D--Q--G--T-----Q--K--S--V--R--S--S--E--Y--O--R--F--G                                                          | 2742 |
| LOBOSPOR        | -----P--K--L--S--I--E--A-----S--I--L--L--D--S--Q--K--Y--R--R--L--Q                                                 | 2675 |
| SYNCEPHALASTRUM | DSFRS--VGR-----T--E--K--T--R--R--A--Y--D--R--I--G                                                                  | 2659 |
| FUNCTIVORUM     | -----R--K--D--K--T--E--A--S--P--F-----I--P--S--O--V--F--P--S--L--E--K--S--R                                        | 2654 |
| HALBUM          | -----G--K--A--N--K--P--V--A--N--K--P--D--K--A--G--T--F--K--V--P--A--N--I--D--P--R--V--E--M--R                      | 2797 |
| DPURPUREUM      | -----R--S--N--S--Q--Q--O-----R--V--L--Y--R--N--P--K--S--F--E--N--N--E--L--R                                        | 2773 |
| PVIOLACEUM      | -----N--S--N--G--K--K--Q--L--N-----V--V--A--S--C--D--L--R--S--N--T--Y--N--Q--L--R                                  | 2781 |
| AMPHIPOD        | -----T--Y--S--K--T--G--L--K--T--R--L--K--P--K--T--F--G--D--E--N-----D--G--D--E--T--P--S--A--I--V--S--L--V--R       | 2733 |
| SHRIMP          | RFKRPFGIGNSRMRPADDP-----D--G--N--D--A--D--T--M--Q--S--K--L--I--R                                                   | 2701 |
| MUDCRAB         | RYKKSIGNTCMQPAETS-----T--T--T--D--S--G--N--I--Q--S--K--L--L--R                                                     | 2694 |
| TARDIGRADE      | -----D--E--H-----T--T--E--I--S--R--L--D--K--E--M--D--T--V--K                                                       | 2733 |
| HYDRA           | -----S--V--T--P--S--L--A--T--P--O-----R--A--E--R--Q--A--R--E--I--O--R--L--R                                        | 2606 |
| SALPINGOECA     | -----S--V--T--P--S--L--A--T--P--O-----R--A--E--R--Q--A--R--E--I--O--R--L--R                                        | 2734 |
| SPIDER          | -----S--T--K--T--K--F--Q--I--D--L--E--D--N-----E--K--N--E--K--K--S--T--T--W--M--L--K                               | 2708 |
| LIMULUS         | SPPTKGGRSLKAV--SDIV--DS-----T--S--S--S--S--V--S--D--L--L--R--L--K                                                  | 2755 |
| SCORPION        | -----I--D--N--N--R--N--S--N-----Q--U--T--S--K--N-----K--I--E--L--L--S--S--N--T--P--H--L--R                         | 2719 |
| ROTIFFER        | -----I--D--N--N--R--N--S--N-----Q--U--T--S--K--N-----K--I--E--L--L--S--S--N--T--P--H--L--R                         | 2654 |
| CIONA           | -----V--D--P--G--P--E--F--K--V--D--L--V--K--O--C--K--K-----K--Q--R--G--F--G--V--A--I--D--V--O--R--L--R             | 2740 |
| OCTOPUS         | VYPTKRPGPGFGOKLSALKDSOE--DP--L--E--S--O--K--I--N--K--S--K--F--A--Y--L--K                                           | 2670 |
| CAPITELLA       | -----K--T--P--G--E--F--G--O--R--K--V--K--S--D--V--R-----V--S--A--M--D--B--A--N--K--I--M--L--K                      | 2716 |
| LIMPET          | -----Q--S--K--A--G--L--R--R--O--T--I--V--K--O--L--G--H--A--P--K-----S--G--M--L--N--K--S--D--T--W--K--L--R          | 2696 |
| SCALLOP         | RMRPKPSGFGQPPGPPSPKVKTE--E--KA--G--P--S--E--D--E--G--N--E--M--F--R--L--K                                           | 2758 |
| LINGULA         | RYKKTGPFKGRKLMGDTFT--DS--R--E--D--D--S--E--K--E--I--Q--N--L--K                                                     | 2722 |
| OYSTER          | PKRRPGPGFGRPR--AGAS--SK--PAE--R--S--R--N--E--D--O--S--E--M--Y--R--L--K                                             | 2716 |
| SNAIL           | HHHTGTGNSFKQMA--T--E--R--T--G--N--S--A--G--P--K--N--D--N--T--P--E--D--N--W--K--L--R                                | 2726 |
| SPONGE          | -----N--P--L--R--I--S--A--R--L--G--K--V--G--E--S--G-----G--E--K--E--K--K--O--V--L--Q--L--K                         | 2751 |
| PRIAPULA        | -----T--P--T--A--K--R--R--G--A--T--G--E--E--P--R--E-----E--S--A--A--G--G--D--V--M--R--L--R                         | 2763 |
| DANTO           | RAVGAGFGSKRLTATS--DUT--DS--R--T--A--A--E--R--E--R--A--D--I--L--R--L--R                                             | 2738 |
| ESHARK          | -----K--P--V--G--P--F--G--K--R--L--A--L--P--G--D--E--V--D--S--K-----T--R--G--I--D--O--R--A--D--I--L--R--L--R       | 2746 |
| BSHARK          | -----K--P--V--G--P--F--G--K--R--L--A--L--P--G--D--E--V--D--S--K-----T--R--G--I--D--O--R--A--D--I--L--R--L--R       | 2738 |
| XENOPUS         | -----K--P--L--G--P--N--F--G--K--R--L--A--L--P--G--D--E--V--D--S--K-----T--R--G--I--D--O--R--A--D--I--L--R--L--R    | 2754 |
| STERLET         | -----K--P--V--G--P--F--G--K--R--L--A--L--P--G--D--E--V--D--S--K-----T--R--G--I--D--O--R--A--D--I--L--R--L--R       | 2755 |
| GAR             | -----K--P--V--G--A--D--F--G--K--R--L--A--L--P--G--D--E--V--D--S--K-----T--R--G--I--D--O--R--A--D--I--L--R--L--R    | 2752 |
| HUMAN           | -----K--S--V--G--P--F--G--K--R--L--A--L--P--G--D--E--V--D--S--K-----T--R--G--I--D--O--R--A--D--I--L--R--L--R       | 2729 |
| PLATYPUS        | -----K--P--L--G--P--N--F--G--K--R--V--L--P--G--D--E--V--D--S--K-----T--R--G--I--E--R--T--E--I--L--R--L--R          | 2736 |
| TASDEVIL        | -----K--S--V--G--P--N--F--G--K--R--L--A--L--P--G--D--E--V--D--S--K-----T--R--G--I--D--E--R--A--B--I--L--R--L--R    | 2740 |
| COELACANTH      | -----K--P--V--G--P--F--G--K--R--L--A--L--P--G--D--E--V--D--S--K-----T--R--V--A--D--O--R--L--D--I--L--R--L--R       | 2746 |
| CAECILIAN       | -----K--P--L--G--P--N--F--G--K--R--L--A--L--P--G--D--E--V--D--S--K-----K--A--R--G--I--D--D--R--S--D--I--L--R--L--R | 2748 |
| CANARY          | -----K--P--V--G--P--F--G--K--R--L--A--L--P--G--D--E--V--D--S--K-----K--T--R--G--I--E--R--A--B--I--L--R--L--R       | 2737 |
| OSTRICH         | -----K--P--V--G--P--F--G--K--R--L--A--L--P--G--D--E--V--D--S--K-----K--I--R--G--I--D--E--R--A--B--I--L--R--L--R    | 2707 |
| GECKO           | -----K--P--L--G--P--N--F--G--K--R--L--A--L--P--G--D--E--V--D--S--K-----K--T--R--G--I--D--E--R--A--B--I--L--R--L--R | 2746 |
| TURTLE          | -----K--P--L--G--P--N--F--G--K--R--L--A--L--P--G--D--E--V--D--S--K-----K--A--R--G--I--D--E--R--A--B--I--L--R--L--R | 2746 |
| ALLIGATOR       | -----K--P--V--G--P--N--F--G--K--K--L--A--L--P--G--D--E--V--D--S--T--T--D--I--N--E--R--A--B--I--L--R--L--R          | 2704 |
| APLYSIA         | GPSPGEEKMAAVRTPAGGAGPGDAAAVTGNO--D--V--A--D--G--A--G--S--O--T--I--W--R--L--K                                       | 2772 |
| TRICHOPLAX      | -----K--P--L--S--D--F--G--O--Q--L--S--E--T--A--S--O--P--O--S--Q-----S--V--S--Q--P--S--S--L--N--H--L--R             | 2726 |
| SOFTCORAL       | -----R--P--O--S--E--O--P-----S--T--S--A--A--O--S--D--D--P-----S--N--E--S--S--O--L--O--N--I--R--K--L--K             | 2743 |
| STONYCORAL      | -----K--P--V--P--G--D--F--G--S--Q--L--S--Q--A--S--S--R--I--S--S-----H--O--S--O--P--N--E--K--K--E--I--L--K--L--K    | 2771 |
| SEA ANEMONE     | -----K--P--V--P--H--F--G--S--R--L--A--P--T--Q--S--D--S--Q-----Q-----T--P--A--M--G--S--O--O--O--I--L--R--L--K       | 2725 |
| SEA CUCUR       | -----K--P--V--G--P--G--F--G--K--R--L--S--V--Q--K--O--N--T--D--T-----G--A--S--K--A--E--G--K--E--I--M--R--L--K       | 2745 |
| LANCELET        | -----K--P--V--G--P--G--F--G--S--D--R--L--S--A--G--R--D--Q--T--D--G-----R--A--A--E--D--S--O--O--S--E--I--M--R--L--K | 2772 |
| STARFISH        | -----T--A--T--D--A--G--F--G--K--E--L--Q--S--D--O--P--R--G--R--D--E--V-----D--A--Q--O--S--G--E--D--K--I--N--R--L--K | 2787 |
| SEA URCHIN      | -----O--A--G--A--G--G--S--R--D--K--E--V--A-----R--K--A--P--S--E--E--K--K--V--O--R--L--K                            | 2769 |

Supplementary Figure 6 CLUSTAL OMEGA ALL PHYLA, EXPANDED

|                 |                  |                                 |                       |      |
|-----------------|------------------|---------------------------------|-----------------------|------|
| PARAMECIUM      | NKSHLSQFLQANFTIS | -----FQQIQL-TSNNOIRYKPE         | SATSLSLDPTEKYY-KLKSQ  | 2651 |
| TETRAHYMENA     | KNNLSKPFASHLFD   | -----FSQVNK-NSTNKIRYODSKE       | GKLTLN-----TVDIK      | 2846 |
| STYLNCHIA       | CKADLAKFPAQNYV   | -----YRPOESQOGQRIRYVPGSMPALOK   | -----OEIR             | 2817 |
| APHANOMYCESa    | V---             | RFTYS-----TSNARISD              | -----ESSRTKTFPOEASRS  | 2484 |
| APHANOMYCESa    | A---             | KRFTK-----HRGNEPGN              | -----QENRTKSYFQDOASRS | 2419 |
| PYTHIUM         | R---             | RFTVKQST-----VFS--SGEARG        | -----AKGADKRYFOERYALF | 2654 |
| PLASMOPARA      | N---             | RFTTRNF-----ADSSAVEDKXSN        | -----DKLKLKRFYQDKYAML | 2624 |
| BREMIA          | V---             | RFLKORAA-----VDH--TTDKVPSN      | -----KDKVSKLYPODOHGFL | 2606 |
| AEDES           | K---             | RILKOKD-----                    | -----RSARDQALKAI DR   | 2694 |
| MIDGE           | H---             | RILKQHE-----                    | -----NRSKDYAMKAI DR   | 2665 |
| BOMBUS          | K---             | RFLSNAS-----                    | -----DISAATROKBI KR   | 2550 |
| ANT             | T---             | RILAMTS-----                    | -----DVAITYRBOIRK     | 2603 |
| WHIPWORM        | R---             | RILKDTF-----                    | -----QKQFYANLAKKK     | 2643 |
| TRICHINELLA     | N---             | RILKDTF-----                    | -----E-KAFVNLNKRK     | 2654 |
| BEEBLE          | R---             | RFLKDKA-----                    | -----KVHSYPAQOQVKK    | 2521 |
| BARNACLE        | R---             | RRVETDAR-----                   | -----QVSARMARRHADO    | 2562 |
| THRIP           | R---             | ARFYGRS-----                    | -----KAVSVFSKANVKK    | 2611 |
| FLEA            | R---             | RDLKDXD-----                    | -----KASQOFAARAI AK   | 2599 |
| WHITEFLY        | K---             | TGSKEDDS-----                   | -----KYALQNIKL---     | 2673 |
| TICK            | R---             | RFLRDED-----                    | -----KVKLQHIKREVRK    | 2638 |
| TERMITE         | R---             | RFLRRDD-----                    | -----QKRIFHASREIQR    | 2686 |
| DAPHNIA         | K---             | RFTTGP-----                     | -----PPA-----         | 2464 |
| OSTREOCOCCUS    | P---             | RFLDQGV-----                    | -----Q-----           | 2626 |
| STENTOR         | E---             | KLKA-----                       | -----                 | 2360 |
| KLEBSORIDIUM    | R---             | RILKRF-----                     | -----T-SQVLQGLGA      | 2835 |
| CLUBMOSS        | R---             | RLYVYKES-----                   | -----R-AGTLRNVFNA     | 2565 |
| MOSS            | R---             | RILNPRAT-----                   | -----Q-SQVLTVGFPA     | 2708 |
| LIVERWORT       | R---             | RILANAA-----                    | -----R-SQVIRSVLNA     | 2739 |
| LIGNANO         | R---             | RMLFLOQQQQQAASSSSGAAASSSDGPPATQ | -----GSSSSYSAPAQAGVER | 2943 |
| COPEPOD         | R---             | RFLKQK-----                     | -----AGYKSTFSKIAERO   | 2593 |
| GLOBOSUM        | ---              | SYA--SK-----                    | -----YDSTYFAYGAERK    | 2549 |
| PALUSTRIS       | ---              | QVQ--GT-----                    | -----YDHRFYAAQOERO    | 2616 |
| NEOCALLIMASTIX  | A---             | LRVYKTSN-----                   | -----ARKIFPANAALIK    | 2708 |
| GLOMUS          | R---             | RSFKPSQ-----                    | -----L--DFKQMMATO     | 2761 |
| LOBOSPOR        | M---             | RHVHATV-----                    | -----SOSQYRRAYEAK     | 2697 |
| SYMCEPHALASTRUM | K---             | RFLKTSR-----                    | -----DSTYFPRRHEERO    | 2681 |
| FUNGIIVORUM     | K---             | RFLKQTP-----                    | -----NRS-----QOMETR   | 2673 |
| HALBUM          | N---             | RKKKDNK-----                    | -----DCEHNAAPARLAVKK  | 2822 |
| DPURPUREUM      | K---             | RFKIDDK-----                    | -----GSDRHWKPARMQVKK  | 2798 |
| PVIOLACEUM      | K---             | RFKKVDK-----                    | -----VQCGRIAGPARLQVMR | 2806 |
| AMPHIPOD        | R---             | RFLROOD-----                    | -----KQOYRFPAQAEKR    | 2756 |
| SHRIMP          | R---             | RFLKQND-----                    | -----REKQSIYFAKIEERR  | 2724 |
| MUDCRAB         | K---             | RFLKQDD-----                    | -----REKQTIFFAKOBERR  | 2717 |
| TARDIGRADE      | R---             | RFLRDSNS-----                   | -----DSSNKSFFIKREYGR  | 2757 |
| HYDRA           | F---             | RHFKNKS-----                    | -----EHSYYPASLEKKR    | 2627 |
| SALPINGOEA      | R---             | RFLVKSOK-----                   | -----RAQAALFHAKRMAAR  | 2758 |
| SPIDER          | K---             | RFLKOKA-----                    | -----NSE-VFAROLRR     | 2728 |
| LIMULUS         | R---             | RFLKQDE-----                    | -----KHLRVFVKRAARL    | 2776 |
| SCORPION        | R---             | RFLKQRE-----                    | -----KSLRHFIRBHRK     | 2740 |
| ROTIIFER        | R---             | RFLKQAE-----                    | -----SOSKFFARKQIAK    | 2676 |
| CIONA           | R---             | RFLKQOT-----                    | -----DSRINPARVQEVK    | 2761 |
| OCTOPUS         | K---             | RVLKQRE-----                    | -----AQSLYPAKKQITK    | 2691 |
| CAPITELLA       | R---             | RFLHDOE-----                    | -----STARFFMKKNVRM    | 2737 |
| LIMPET          | R---             | RFLKQKD-----                    | -----DRLFFMKKNVRL     | 2716 |
| SCALLOP         | R---             | RFLRDEE-----                    | -----ASRIFPARTRVRV    | 2779 |
| LINGULA         | R---             | RFLKQOR-----                    | -----ARSTYFAKKNI RL   | 2743 |
| OYSTER          | R---             | RFLRDEE-----                    | -----QTKTYPIKRHTRL    | 2737 |
| SNAIL           | R---             | RFLKORS-----                    | -----TASKYFARRI KE    | 2747 |
| SPONGE          | K---             | RALKQKE-----                    | -----MVSSFFAMNEARK    | 2772 |
| PRIAPULA        | R---             | RFLKQDE-----                    | -----QTVVFARRHARR     | 2784 |
| DANTO           | R---             | RFLKQDE-----                    | -----KESIFPAKKEIHS    | 2759 |
| ESHARK          | R---             | RFLKQRE-----                    | -----KVSILYARKGVAE    | 2767 |
| BHARK           | R---             | RFLKQRO-----                    | -----KSLNIPARKSIOE    | 2759 |
| XENOPUS         | R---             | RFLKQRE-----                    | -----KLSLIYARKGTAE    | 2775 |
| STERLET         | R---             | RFLKQDE-----                    | -----KVSILYARKGVRE    | 2776 |
| GAR             | R---             | RFLKQDE-----                    | -----KVSLOFARKGIOA    | 2773 |
| HUMAN           | R---             | RFLRQDE-----                    | -----KLSLMYARKGVAE    | 2750 |
| PLATYPUS        | R---             | RFLKQDE-----                    | -----KLSLIFAKKGVVE    | 2757 |
| TASDEVIL        | R---             | RFLKQDE-----                    | -----KLSLIYARKGVVE    | 2761 |
| COELACANTH      | R---             | RFLKQDE-----                    | -----KVSILYARKGVQI    | 2767 |
| CAECILIAN       | R---             | RFLKQOG-----                    | -----QISKIFVRRGVAE    | 2769 |
| CANARY          | R---             | RFLKQOD-----                    | -----KLSLIYARKSLAE    | 2758 |
| OSTRICH         | R---             | RFLKQDE-----                    | -----KLSLIYARKGVAE    | 2728 |
| GECKO           | R---             | RFLKQDE-----                    | -----KLSLIYARKGVAE    | 2767 |
| TURTLE          | R---             | RFLKQDE-----                    | -----KLSLIYARKGVAE    | 2767 |
| ALLIGATOR       | R---             | RFLKQDE-----                    | -----KLSVIYARKGVAE    | 2725 |
| APLYSIA         | R---             | RFLKQKD-----                    | -----AQSVHFMRRNI RL   | 2793 |
| TRICHOPLAX      | R---             | RVLKSEM-----                    | -----ANNAFYAKKERRK    | 2747 |
| SOFTCORAL       | R---             | RFLKQDK-----                    | -----ETDVIYFAKKEIAR   | 2764 |
| STONYCORAL      | R---             | RFLKQDS-----                    | -----QISAFFAKQALKR    | 2792 |
| SEA_ANEMONE     | R---             | RFTKDSQT-----                   | -----KDRQYFIRMEKKK    | 2747 |
| SEACUKE         | R---             | RFLKQOK-----                    | -----SSSLYPAKREKKK    | 2767 |
| LANCELET        | R---             | RFLKQDD-----                    | -----VTKAYHARROIRM    | 2793 |
| STARFISH        | R---             | RFLKQHS-----                    | -----SQAYFARREMKR     | 2808 |
| SEA_URCHIN      | R---             | RFLKQOS-----                    | -----SQSAFFAKRATRO    | 2790 |

Supplementary Figure 6 CLUSTAL OMEGA ALL PHYLA, EXPANDED

|                 |                                                              |      |
|-----------------|--------------------------------------------------------------|------|
| PARAMECIUM      | QPSSQMYTST--QGFELKPVQNRVRRKRELDLPIKIKHKDIDPLIVLQPEFDELGRV    | 2709 |
| TETRAHYMENA     | KRQOQLFFEN--QNRMRKQOQLTRKXIKHSLPDIGLVKDIIDPMALSPIDEIAGQL     | 2904 |
| STYLONCHEA      | KMORBOYLOR--QIQOKKHOVGLRRRVVGLPDIOISYEDVLPKQALIKSDLTITEV     | 2875 |
| APHANOMYCESa    | KROELARLNQ--KBAKGTAVSLRAIVRVEFPDIQIPRMDVLRPLLVASLHAAISAL     | 2541 |
| APHANOMYCESa    | KKLEIARIKQ--AKSKGSKVSLRAIVRVEFPDIQIPRMDVLRPLLVASLHAAISAL     | 2476 |
| PYTHIUM         | KKTEBALLNR--QKARDQOVQMRKRVVGEFPDIQIKLKDIDPLMALCEMDDAISAI     | 2712 |
| PLASMOPARA      | KKHDLAKMTR--ER--HOEHVRIKRAVRAGEFPDIQITQDDIVDPIMALCEVVEISLL   | 2680 |
| BREMIA          | KKREBAQIR--ERNROGHVMMKRSRVGEFPDIQITQDDIVDPIMALCEVVEISGLV     | 2664 |
| AEDDES          | YTYETVRRKASH--KMRQGEVVLRRVRIQDFPDLINSLALMLPQALCRPPPLARQV     | 2752 |
| MIDGE           | RNFQARSRRKRFOSRCKEYKLRVRLGELPDPFFNTLAVLLPQLAKRIDQDIPRDV      | 2725 |
| BOMBUS          | NIQBARMIKD--RGVROSSVKLRKRVRIQDFPDIETSHATLEPQLQAKNDLHKKDL     | 2608 |
| ANT             | NBQRTIRIKQ--EVAROSSVKLRKRVRIQDFPDIETSHATLEPQLQAKNDLHKKDL     | 2661 |
| WHIPWORM        | QOMLQWATF--AAQTKSYVRLKRSRRRDFPDIQIPHAAIVTTLQAVQLGDTSGLL      | 2701 |
| TRICHOINELLA    | QKVIETRLKO-----QSLDRKRRRDFPDIQIPYSVAIITLQAVBELRVFGAL         | 2705 |
| BEEFLE          | SSKTIKXKKE--PAKREKNTIYRSYKGDLPDQVITLQAVLEPQLIALLRREIKSL      | 2579 |
| BARNACLE        | RALFEDQRD--EPRQDAQVLFRRVRRGELPDIETPYSDLLRPLQALMHPPIARL       | 2620 |
| THRIP           | AKRREEMWRE--RKLREGEQVAMHRKVRIGDLPDIQIKFADVINPLTELARHDSIIRKTI | 2669 |
| FLEA            | KKKDRRLIT--RSKMKTSKVTMYRQVRIQDFPDIQITNAAILLPKELAKRSSIQIV     | 2657 |
| WHITEFLY        | NKALBIAQRE--EVEKRSKVTIYRVTGDFPDIETSYKELVPLRVFVQDQSRHLL       | 2731 |
| TICK            | KELRGEQRE--RRARREAVTLRSYRIGDLPDIETPHSALVAPLQALQHQDQVQVL      | 2696 |
| TERMITE         | SARQOELQO--RGRRLANIASFREYRSDFPDIETSYSAITKPMQELAKRDAAVRHL     | 2744 |
| DAPHNIA         | --KPSYENRGR--SANKTSSQPTIYRKYRTGELPDIQIPPSLILAPLCAVRNDAILIKTL | 2521 |
| OSTREOCOCCLUS   | RTLGQSVLLD---IDGLKODIKLRSYRTGELPDIKISRNELLPFLVYRERSVILKAL    | 2682 |
| STENTOR         | --QGRREBR--TMRKQVNRVRSYRTGELPDIETKRSODIKPLAMILLCEITKSE       | 2416 |
| KLEBSORIDIUM    | RRRRRBAASA--QAGVHKVTMRRSYRTGELPDIQIKFADVINPLTELARHDSIIRKTI   | 2893 |
| CLUMBOSS        | TKKKALQST--EATFRANKVOIMRQVYRTGELPDIETKXHDVIGPMGSLAERDATHRLL  | 2623 |
| MOSS            | SRRRBARLKL--QSLFRANKVHMRQVYRTGELPDIETKXHDVIGPMGSLAERDATHRLL  | 2766 |
| LIVERWORT       | NRRREBARAQ--QASFRANKVHMRQVYRTGELPDIETKXHDVIGPMGSLAERDATHRLL  | 2797 |
| LIGNANO         | HRROARBAE--AAAKREHVVTLRRVYRIGDLPDVOMEQGALVTTLAGLAKORMPGRLL   | 3001 |
| COPEPOD         | NVRKQLEED--QLKASEKNTVLRVYRIGDLPDIQIPYSDLIAPLILKQKLEPELKVVL   | 2651 |
| GLOBOSUM        | KKBARNIETP--QAAASQSVTLRKYRIGDLPDIETKXHDVIGPMGSLAERDATHRLL    | 2607 |
| PALUSTRIS       | KKARAKNOL--QKIARARTVTLARKVYRIGDLPDIETQHSIINPLQALMRDSEVQOV    | 2674 |
| NEOCALLIMASTIX  | KKRIQKHLK--GKQAKLVYTLRKYRIGDLPDIQIKYKELIPLQALAIADTISKNL      | 2766 |
| GLOMUS          | R-KODBIYRT--SQHAFPKNISMLRQVYRIGDLPDIETKXHDVIGPMGSLAERDATHRLL | 2818 |
| LOBOSPOR        | VONKQAIAAN--KEIARAKSVSIIRKYRIGDLPDIQIAYSVDIPLKSDAEMDVEIKRML  | 2755 |
| SYNCEPHALASTRUM | RTTLOSLEAM--RRQKREAVTMRKRVYRIGDLPDIQIKNSDLIPLQALGRDNEIKRIL   | 2739 |
| FUNCTIVORUM     | LKWKQOIOA--ARQAKVAVTLRKYRIGDLPDIETKRSODIKPLAMILLCEITKSE      | 2731 |
| HALBUM          | SKDQDLMSK--AKQARENOVTMRKRSYRIGDLPDIQIKLQELIPLQALQDHHVTSV     | 2880 |
| DUPURPUREUM     | NIDREAFFEK--SKQARENOVTMRKRVYRIGDLPDIQIKLQELIPLQALQDHHVTSV    | 2856 |
| PVIOLACEUM      | NKREBSPEK--SKQARENOVTMRKRVYRIGDLPDIQIKLQELIPLQALQDHHVTSV     | 2864 |
| AMPHIPOD        | RALKHRLERE--RTLREAOVTMRKRVYRIGDLPDIQIHRVAVLPLQALSERDSSVHRV   | 2814 |
| SHRIMP          | SKLREKLEKE--RFRREAOVTMRKRVYRIGDLPDIQIHRVAVLPLQALSERDSSVHRV   | 2782 |
| MUDCRAB         | NKMRATLEME--RKLREAOVTMRKRVYRIGDLPDIQIHRVAVLPLQALSERDSSVHRV   | 2775 |
| TARDIGRADE      | RRAIETLKN--ERERSLDVTLRSYRIGDLPDIETSYEAVIPLRNLAEVDQISLL       | 2815 |
| HYDRA           | QKLRSEALEK--RRIARDQVVMRKYRIGDLPDIETKXHDVIGPMGSLAERDATHRLL    | 2685 |
| SALPINGOECA     | KOBARRLLEL--RRKARAQVTLRSYRIGDLPDIQIKRELLIPLQALQDHHVTSV       | 2816 |
| SPIDER          | QDRRKEILKD--QKSHRDAQVTMRKRVYRIGDLPDIETSNASITQPVQALMNDVSIKLL  | 2786 |
| LIMULUS         | KMRRDULLKE--QKSRREAOVTMRKRVYRIGDLPDIETSNASITQPVQALMNDVSIKLL  | 2834 |
| SCORPION        | QQLRREKRE--QKSRREAOVTMRKRVYRIGDLPDIETSNASITQPVQALMNDVSIKLL   | 2798 |
| ROTIFFER        | KVNDLRLKO--LKAARENOVTMRKRVYRIGDLPDIQIKHSYIAPLQALQDHHVTSV     | 2734 |
| CIONA           | KKRETFQKE--HEKRSNDVTLRRVYRIGDLPDIQIKHSYIAPLQALQDHHVTSV       | 2819 |
| OCTOPOUS        | NFTOVOLVHE--QKSHREAOVTMRKRVYRIGDLPDIQIKHSYIAPLQALQDHHVTSV    | 2749 |
| CAPITTELA       | KKMRDILQRE--QKMKREAOVTMRKRVYRIGDLPDIQIKHSYIAPLQALQDHHVTSV    | 2795 |
| LIMPET          | RKRREERLME--QKSRRENOVTMRKRVYRIGDLPDIQIKHSYIAPLQALQDHHVTSV    | 2774 |
| SCALLOP         | QOMRQVALQO--QKTRRENOVTMRKRVYRIGDLPDIQIKHSYIAPLQALQDHHVTSV    | 2837 |
| LINGULA         | QAMROBALKE--QKLRREAOVTMRKRVYRIGDLPDIQIKHSYIAPLQALQDHHVTSV    | 2801 |
| OYSTER          | EKMREALRE--QKSRREAOVTMRKRVYRIGDLPDIQIKHSYIAPLQALQDHHVTSV     | 2795 |
| SNAIL           | KSKREELRKO--QKLRREAOVTMRKRVYRIGDLPDIQIKHSYIAPLQALQDHHVTSV    | 2805 |
| SPONGE          | KMRRBELKQO--RRAARENOVTMRKRVYRIGDLPDIQIKHSYIAPLQALQDHHVTSV    | 2830 |
| PRIAPULA        | KORREBAETL--SNQREAOVTMRKRVYRIGDLPDIQIKHSYIAPLQALQDHHVTSV     | 2842 |
| DANTO           | QRTREBRAD--LKIRODAQVTMRKRVYRIGDLPDIQIKHSYIAPLQALQDHHVTSV     | 2817 |
| ESHARK          | QKABQKIKTE--RKMREDAQVTMRKRVYRIGDLPDIQIKHSYIAPLQALQDHHVTSV    | 2825 |
| BSHARK          | KHLAKEMKTE--QLKRDQAVTLRKYRIGDLPDIQIKHSYIAPLQALQDHHVTSV       | 2817 |
| XENOPOUS        | QKREKAKIP--QKMKQDAQVTMRKRVYRIGDLPDIQIKHSYIAPLQALQDHHVTSV     | 2833 |
| STERLET         | QKQKENVAR--QKLRREAOVTMRKRVYRIGDLPDIQIKHSYIAPLQALQDHHVTSV     | 2834 |
| GAR             | QROKERRAE--QTLRREAOVTMRKRVYRIGDLPDIQIKHSYIAPLQALQDHHVTSV     | 2831 |
| HUMAN           | QKREKEIKSE--LKMKQDAQVTMRKRVYRIGDLPDIQIKHSYIAPLQALQDHHVTSV    | 2808 |
| PLATYPUS        | QKREKEIKSE--LKMKQDAQVTMRKRVYRIGDLPDIQIKHSYIAPLQALQDHHVTSV    | 2815 |
| TASDEVIL        | QKREKEMNE--LKMKQDAQVTMRKRVYRIGDLPDIQIKHSYIAPLQALQDHHVTSV     | 2819 |
| COELACANTH      | QKEEQMKRE--LKMKQDAQVTMRKRVYRIGDLPDIQIKHSYIAPLQALQDHHVTSV     | 2825 |
| CABCILIAN       | QKREKEITAE--RKMKREAOVTMRKRVYRIGDLPDIQIKHSYIAPLQALQDHHVTSV    | 2827 |
| CANARY          | QKREKEIKSE--LKMKQDAQVTMRKRVYRIGDLPDIQIKHSYIAPLQALQDHHVTSV    | 2816 |
| OSTRICH         | QKREKEMSE--LKMKQDAQVTMRKRVYRIGDLPDIQIKHSYIAPLQALQDHHVTSV     | 2786 |
| GECKO           | LKQKELKTE--LKMKQDAQVTMRKRVYRIGDLPDIQIKHSYIAPLQALQDHHVTSV     | 2825 |
| TURTLE          | QKREKEIKSE--LKMKQDAQVTMRKRVYRIGDLPDIQIKHSYIAPLQALQDHHVTSV    | 2825 |
| ALLIGATOR       | QKREKIKTE--LTKMKDAQVTMRKRVYRIGDLPDIQIKHSYIAPLQALQDHHVTSV     | 2783 |
| APLYSIA         | KOMREBAARE--QKARRENOVTMRKRVYRIGDLPDIQIKHSYIAPLQALQDHHVTSV    | 2851 |
| TRICHOPLAX      | KOLREELIKO--QKIARENKVMRKYRIGDLPDIQIKHSYIAPLQALQDHHVTSV       | 2805 |
| SOFTCORAL       | QKLRTEVOR--QKARENKVMRKYRIGDLPDIQIKHSYIAPLQALQDHHVTSV         | 2822 |
| STONYCORAL      | NKFRBOALQO--QKAARENOVTMRKRVYRIGDLPDIQIKHSYIAPLQALQDHHVTSV    | 2805 |
| SEA_ANEMONE     | KOMLQOQSR--LKAARENOVTMRKRVYRIGDLPDIQIKHSYIAPLQALQDHHVTSV     | 2850 |
| SEAUCUE         | QOMREELKE--QKREYHOVTMRKRVYRIGDLPDIQIKHSYIAPLQALQDHHVTSV      | 2824 |
| LANCELET        | QKREERVKE--QKARGNLVTMRKRVYRIGDLPDIQIKHSYIAPLQALQDHHVTSV      | 2851 |
| STARFISH        | KOLKELIKTE--QKREKFTVTRKRVYRIGDLPDIQIKHSYIAPLQALQDHHVTSV      | 2866 |
| SEA_URCHIN      | KELREEVOKS--QKRRPAQVTMRKRVYRIGDLPDIQIKHSYIAPLQALQDHHVTSV     | 2846 |

(YR)xYRxxG(D)xPDXx(I)

Supplementary Figure 6 CLUSTAL OMEGA ALL PHYLA, EXPANDED

|                 |                                                         |      |
|-----------------|---------------------------------------------------------|------|
| PARAMECIUM      | TALFOELY--DRNT-----SAB---TLYEVLLGLI--QR                 | 2737 |
| TETRAHYMENA     | QLLLHSMF--MKEE-----SADROQKLDKILSNIL--AK                 | 2935 |
| STYLNCHIA       | VEIFSELY--KSON-----DQQORELLGQGVNRII--NE                 | 2906 |
| APHANOMYCESa    | SALLNVMI--PTLPS-----SIQTVQVGFYFETLL--E-                 | 2570 |
| APHANOMYCESa    | SIIILSHVL--PNLSA-----STQSQVITKIEALL--Q-                 | 2505 |
| PYTHIUM         | MAEVMASVV--ATKSF-----DEGTLRTLGMARMSAL--T-               | 2744 |
| PLASMOPARA      | DELFSSTIV--ATNEFE-----KSGIVDELTEKLEGTTI--T-             | 2712 |
| BREMIA          | SALFSSIT--GNYQFE-----KIGIAKRLTEKLNETT--I-               | 2696 |
| AEDES           | VAFISGHI--EEDQNN--EV-----DSR--EAIAGDGSIQKIF--TE         | 2788 |
| MIDGE           | IISIFOSH--QILRQK--ES-----GEETENDFPQISNNSTMSILKQNLN      | 2767 |
| BOMBUS          | IVNVVCSHI--ENCR-----QSSFIKGLVDSMETHM--EN                | 2639 |
| ANT             | IVALFYSH--KETTER--EK-----SDDFRLTIVEMKOL--HK             | 2696 |
| WHIPWORM        | LEADMCGL--EHSRN--ER-----QGESAKFFGATISLLADML--SN         | 2739 |
| TRICHINELLA     | ESLMCSVA--ANVIEI--YN-----FEMTEKYFSDISDGLRDI--RS         | 2743 |
| BEEBLE          | EKFKLSHI--EKRR-----S-----DANPIQEISVIGIQTIF--NN          | 2611 |
| BARNACLE        | LAGLLVCHI--HELDA--EQRPSPTQSRKRPAAGVGADQLRDVSSGLESV--RR  | 2672 |
| THRIP           | MVSLVGVK--EVIDAS--DN-----SNDFKLTSASLNNV--KQ             | 2704 |
| FLA             | LHSIYCHI--AELD-S--ES-----QKHFIKEINQSIENIF--RK           | 2691 |
| WHITEFLY        | IVALFKSFI--DEES-L--QG-----ADDFYREVMASTGNIL--QN          | 2765 |
| TICK            | LTSTVKNIV--KGA--DL-----PELC-RELEVALSSIT--VT             | 2728 |
| TERMITE         | FVLLFDGLI--GELY--DE-----KEYVTQKVKAMGSIV--ST             | 2777 |
| DAPHNIA         | CHLLVLR--QQVREI--QG-D-----DKEFASKLNTLSQSI--EN           | 2557 |
| OSTREOCOCCLUS   | REFFSVAM--EPEFYSRKH--GGDLHADHKGGLRTRDKKNVGGIARALKGF--SK | 2735 |
| STENTOR         | WTFITALE--TFFD-----DAKRRITGCLARIE--BI                   | 2446 |
| KLEBSORIDIUM    | BAGLFRAN--ALPSTA--LR-DGE-----NDVRBPVRECVAAAL--A-        | 2929 |
| CLUBMOSS        | LSSIFGFW--QND-----V-----TTVKTEIRTFENAL--E-              | 2652 |
| MOSS            | LRLCSNVY--SLPSGG--Q-----DIIKAEVRLGLEAAL--R-             | 2797 |
| LIVERWORT       | VTVICRNVY--SQPAGR--QE-DIT-----SDIKSOMTOGIGKAL--E-       | 2833 |
| LIGNANO         | CAQLGOSMV--DWAASA--LS-EDD-----VADMCRRLLAAWLGVL--IP      | 3039 |
| COPEPOD         | SGVILGHL--DVNAEL--LN-DEG-----LEEIMEIFNNIF--NN           | 2685 |
| GLOBOSUM        | MTIILLKMLDNTIDLE--KL-----TQAINGVF--KT                   | 2636 |
| PALUSTRIS       | SSLVASVL--GHVDDYK--GM-DEE-----RKEEYKSVIERHLODIL--NR     | 2714 |
| NEOCALLIMASTIX  | IMILESIV--SKDEI--MN-DKE-----CNQFTEKVEKINNIL--QN         | 2804 |
| GLOMUS          | TSLFVSIY--NQLDNN--IQ-SEE-----IKEYKTIQRHQQDIF--SN        | 2856 |
| LOBOSPOR        | SKLVISSHI--QQIDSH--VE-SEE-----EALSFKDGLIRDFKNIL--QK     | 2794 |
| SYNCEPHALASTRUM | HAHIVVSH--QYADRY--LQ-DKR-----PDMQNVILVQVQK--AN          | 2776 |
| FUNCTIVORUM     | HAHFALLE--QAAQD--MD-----LQYR--GIDRE--K-                 | 2760 |
| HALBUM          | SLLPFIYI--QHCPRD--QV-----NKFSSCKQSEKIL--D-              | 2913 |
| DUPURPUREUM     | SLLPFSIY--NKTQOE--NI-----RSPQNKIKKLESIV--D-             | 2889 |
| PVIOLACEUM      | SSLPFIYI--KNSKQQ--QQ-----KDEIKQALFPIV--D-               | 2894 |
| AMPHIPOD        | VLLCEGLI--RHGEER--LS-ETQ-----LKNWREERSALSTLIL--VE       | 2852 |
| SHRIMP          | EVLACQVI--NSAGTA--MH-HRE-----EQWNQELHEALNGIL--SS        | 2820 |
| MUDCRAB         | DVVVQVIV--DNADSL--MT-RGE-----KDTWIQQLHSSVNVII--AN       | 2813 |
| TARDIGRADE      | LRNLFQGIY--AQARTK--SE--K-----VDELEKLAKRLEGIL--KH        | 2851 |
| HYDRA           | VSLFLAIL--NQLSQ-----S-----SESILLKQNTLNIIIM--QS          | 2718 |
| SALPINGOECA     | ESLFIYVI--HELPTI--LS-ERD-----AANMKAENYKAVNGLI--QA       | 2854 |
| SPIDER          | LKSLSMIC--TSVKED--FP-EG-----FEAFCAQIGSCFENIL--QK        | 2823 |
| LIMULUS         | ITSVAKMLC--QSEEN--HP-HD-----YIVLCNELKQVFNHIL--QQ        | 2871 |
| SCORPION        | QSLILVHC--CTMKSN--QV-TE-----YSEFCRSLSSALAEHIL--KK       | 2835 |
| ROTIFFER        | ESIFVSHI--SEISYL--KD-EQD-----SVKILKELTYOILMAM--AS       | 2772 |
| CIONA           | LSSLVCHIL--KEERKR--DG-E-----ENTPANTGDKNFOIL--EI         | 2854 |
| OCTOPOUS        | NSLFKGHI--ADAEQE--KG-DED-----METSIOQVONSIRNML--KA       | 2787 |
| CAPITELLA       | VAVFOATF--TQIESE--KT-ERE-----SQSLVAKIESSLNKLIL--ET      | 2833 |
| LIMPET          | SSLFKAIY--KKMDEV--KT-ERE-----MEETIELNTSVETMF--NT        | 2812 |
| SCALLOP         | SELFKAIY--DQMDQV--KV-ERE-----IEPIVEIQKDSLSTVL--SQ       | 2875 |
| LINGULA         | SALFRATF--SELQDV--KT-ERE-----TTEMAQISRSLNAML--DS        | 2839 |
| OYSTER          | GATFKGHI--SKMDEV--KT-ERE-----VQETIQQIKSIVGVIL--TT       | 2833 |
| SNAIL           | GAVFKAIY--QEMDKV--KT-DQE-----MEETKEKISDSLGRML--ST       | 2843 |
| SPONGE          | CSLFNSIF--SQLDHL--LT-EED-----AAATKGVIEGNINTIL--DC       | 2868 |
| PRIAPULA        | SSLCDQVY--RRAGDT--AT-ERD-----VDATMEKLEAVSVMA--SS        | 2880 |
| DANTO           | SSLFAGVI--VEMERL--KS-NKE-----TADILKELVQTLNAPL--NK       | 2855 |
| ESHARK          | SALFSGHI--EVIKIS--KT-A-E-----TKDTSQVLVENHIL--KA         | 2862 |
| BHARK           | SSLFSGHI--EVRKKS--KT-AAE-----MSGIGKELLKHTFPLI--NT       | 2855 |
| XENOPUS         | SSLFSGHI--TDTAS-----D-----DISVTDKLLKQPNFSL--SN          | 2865 |
| STERLET         | SSLFSGHI--IEMEKS--KS-QSE-----KKRITEILLQDMNFI--SK        | 2872 |
| GAR             | LSTLFCGHI--AQMEGS--KN-EAE-----KRRITEELLQDMNHFI--NK      | 2869 |
| HUMAN           | SSLFSGHI--KEMDKF--KT-LSE-----KNNITQKLLQDFNRFI--NT       | 2846 |
| PLATYPUS        | SSLFAGHI--KEIDKF--KS-QSE-----KRNITLKLQDFNHFI--SS        | 2853 |
| TASDEVIL        | GSLFAGHI--KEMDKF--KS-PSE-----KKSITEKLLLDPNYFI--SS       | 2857 |
| COELACANTH      | SNLFTGHI--TEMEKS--RS-DSE-----RKTILLELLGNFNGFI--SN       | 2863 |
| CABECILIAN      | SSLFPGHI--KEMDKL--KS-SSE-----MKDITQKLLADFNRFI--NI       | 2865 |
| CANARY          | SSLFSGHI--HEVKKK--KH-PSE-----KNAIIVQKLLANDFNFI--SM      | 2854 |
| OSTRICH         | SSLFSGHI--REVEKS--KT-PSE-----KKIITQKLLKDFNQFI--SM       | 2824 |
| GECKO           | SSLFAGHI--EMERKS--KS-QSE-----KNSIIQQLVQDFNCFI--TF       | 2863 |
| TURTLE          | SSLFSGHI--KEMNPF--KN-PSE-----KNCITQKLLQDFNFI--SM        | 2863 |
| ALLIGATOR       | SSLFSGHI--KEMENS--KS-PIE-----KTHIVQKLLQDFNFI--SI        | 2821 |
| APLYSIA         | SSLFQATF--RAMDQV--KT-ERE-----MEELTAQINRSMESLI--AQ       | 2889 |
| TRICHOPLAX      | VN--LIV--NDLVEN--FN-DED-----AAETKAEIKASLSNIV--KK        | 2840 |
| SOFTCORAL       | SGIFRGHI--SQIDEN--VT-DTQ-----ADELFRIDQDALNNMI--TS       | 2860 |
| STONYCORAL      | SALFRGHI--SKIDEX--LP-ERE-----AASVTSDLRSAMNHMI--SS       | 2888 |
| SEA ANEMONE     | SVLVQATL--SQMDEK--LT-EQD-----AEKVTDTIQGALDNIM--TS       | 2843 |
| SEACUKE         | CSSIFGHI--VQIGEK--KT-ERE-----AEELVKNIQVLNQMI--SS        | 2862 |
| LANCELET        | SSLFRGHI--EEIENV--KT-ERE-----AEDLTCIEISRLNTAL--SN       | 2889 |
| STARFISH        | SSLFRGHI--SEIEEV--KT-ERE-----AESTKVINRHNTMI--ST         | 2904 |
| SEA URCHIN      | SALFRGHI--ARIGDM--CT-DGE-----TELVKVGIERHNLQMI--TD       | 2886 |

Supplementary Figure 6 CLUSTAL OMEGA ALL PHYLA, EXPANDED

|                 |                                                          |      |
|-----------------|----------------------------------------------------------|------|
| PARAMECIUM      | -----SCKTFTIISVLRTPHQVLCKSGILL-----                      | 2764 |
| TETRAHYMENA     | -----SIVHDFNVSLHKTMI-MLTKEGELP-----                      | 2961 |
| STYLNONCHIA     | -----SILYDYGICLCHRVAMELLKTDGPTI-----                     | 2933 |
| APHANOMYCEsa    | -----SAQHNTLVVAALHQAYIGLLCQSKS-----SVTL                  | 2599 |
| APHANOMYCEse    | -----QSQHNTFFVASLHQAYLSLRH--P-----STLL                   | 2532 |
| PYTHIUM         | -----TGKSSLVFISSAVHLTYYSICIMRKSAT-----QMLS               | 2775 |
| PLASMOPARA      | -----LSKASSVYVGCIVSAYVASMIRHPSLF-----NIPV                | 2743 |
| BREMIA          | -----LSKTSSTIYVGCIVSAYLKAIIIGNPRLC-----DLIP              | 2727 |
| AEDDES          | -----TKNCDPNLFCMLIEVAMM-----RPKLF-----N                  | 2812 |
| MIDGE           | -----SKNSDFTLMMHLEMTMK-----SGKYL-----E                   | 2791 |
| BOMBUS          | -----EQNSNSTIQAHELEI-----LLNASIT-----D                   | 2661 |
| ANT             | -----SCERDSSVQHELETLILLSRDAIIVA-----D                    | 2724 |
| WHIPWORM        | -----MSACYRPISSIMNYLYR-----PVDLV-----T                   | 2763 |
| TRICHINELLA     | -----MVTFHRPIASCLMNFLYN-----FIEYV-----H                  | 2767 |
| BEEFLE          | -----SSEFSRNLFRALFDALIF-----SKSSI-----V                  | 2635 |
| BARNACLE        | -----LRTAEPSSLVSNALQTALD--AE--I-----A                    | 2694 |
| THRIP           | -----SKNFEPSTICACLEIAYH--CQ--F-----S                     | 2726 |
| FLEA            | -----SOLCNSNIMRIFEMALE--YPKLM-----N                      | 2715 |
| WHITEFLY        | -----SLSFNPAITGAPFEVSYF--CHEKI-----N                     | 2789 |
| TICK            | -----SDRCFPPLVDFVQETSFS--CAGGL-----K                     | 2752 |
| TERMITE         | -----TKDYTTMVGVMIEIALC--HSRYI-----T                      | 2801 |
| DAPHNIA         | Y-----RLRSGNFNLVAVILEYFWT--NTDEI-----S                   | 2583 |
| OSTREOCOCCUS    | -----IEGGDASVRFPLSLCEF--IPKAT-----D                      | 2759 |
| STENTOR         | -----SEHNSDVSSEHKTARE--LVSKN-----AKFSKE                  | 2475 |
| KLBSORMIDIUM    | -----RTRRSTSVSHACICLE--DPKMR-----                        | 2952 |
| CLUBMOSS        | -----RTHSESTIYGHQDLCLK--DRDAW-----                       | 2675 |
| MOSS            | -----QTHNGLSFVCAEALCLE--DPEIW-----                       | 2820 |
| LIVERWORT       | -----KTSNGISFVCAEALCLE--DATIW-----                       | 2856 |
| LIGNANO         | TSPFDGKRRNGLSAVTAATNDPALIGCALSLCA--VASSACDGGVGVVDVGAIIRP | 3095 |
| COPEPOD         | -----TTVVSTDFIGGLDVCIH--MNPSD-----V                      | 2709 |
| GLOBOSUM        | -----SLMSSSPLIGSLDMLH--NNGII-----QG                      | 2661 |
| PALUSTRIS       | -----SVNLHPPVIAVLRVLYQ--MPV-----TA                       | 2737 |
| NEOCALLIMASTIX  | -----TINYDFSTIHALTFCLK--EN--I-----Y                      | 2826 |
| GLOMUS          | -----STMNFPPFIGSCLRICYE--VNDI-----E                      | 2879 |
| LOBOSPOR        | -----STLYTPTFIGSILRICHD--YGQV-----D                      | 2817 |
| SYNCEPHALASTRUM | -----SFLYFPFIGSFLRVCID--LMAA-----A                       | 2799 |
| FUNCTIVORUM     | -----TSSFGGFIGSMLICYH--QNRH-----                         | 2783 |
| HALBUM          | -----SNATNSALILSLKIVEK--NLELT-----                       | 2936 |
| DUPURPUREUM     | -----CQKYNSTIANSILISEK--NLEFS-----                       | 2912 |
| PVIOLACEUM      | -----KCRFNTSLVSCILNIFEK--NLDS-----                       | 2917 |
| AMPHIPOD        | -----SVQNSAPVMAVHLHLLS--AKI-----M                        | 2874 |
| SHRIMP          | -----SYMCCPQMLRIVLHLMIN--NDV-----R                       | 2842 |
| MUDCRAB         | -----SYMCHPMLRIVLHLVIN--NDI-----L                        | 2835 |
| TARDIGRADE      | -----QNVTDITFLSHLNIILQ--DSPKE-----SKLLES                 | 2880 |
| HYDRA           | -----SIFYDSTFINAVETVCLK--NKEM-----N                      | 2741 |
| SALPINGOECA     | -----TRKGYTPTIIMLHMLRA--SDPAI-----                       | 2877 |
| SPIDER          | -----SYLYFPPFIGSCLTLN--DFPNI-----R                       | 2846 |
| LIMULUS         | -----TVQFPPFIGFVEEVCYH--SVQHL-----P                      | 2895 |
| SCORPION        | -----SVHYHPQIIVYBCLNC--DVKEH-----D                       | 2859 |
| ROTIFFER        | -----SESFNSNFVHELEICIK--NPKLL-----K                      | 2796 |
| CIONA           | -----STEKNPSSIASVEEVALR--NHQYV-----GFNK                  | 2881 |
| OCTOPUS         | -----SEQHFPFIGSMLNILYD--MDKEL-----P                      | 2811 |
| CAPITELLA       | -----STQYFSPFIGSGLIAYL--FPKQL-----K                      | 2857 |
| LIMPET          | -----TSQYFPPFIGSMDIVYV--LRSRL-----K                      | 2836 |
| SCALLOP         | -----SVQYHPPFIGSMDIVYQ--LRSQL-----S                      | 2899 |
| LINGULA         | -----STQYFSPFIGSMDIVYV--NSGRL-----K                      | 2863 |
| OYSTER          | -----SIQYFPPFIGSGLDVLYS--LRSKL-----K                     | 2857 |
| SNAIL           | -----SIHYFPPFIGSMDILHT--LRSLL-----K                      | 2867 |
| SPONGE          | -----STQYFPPFIGSGLDICY--E-NSL-----K                      | 2891 |
| PRIAPULA        | -----STSIFYSPFIGSGLDVCYR--NISIL-----R                    | 2904 |
| DANTIO          | -----STVYFPPFIGSGLDMSYH--HKALL-----G                     | 2879 |
| ESHARK          | -----TTLNFPFVFIGSGLDMSYQ--HKOLL-----G                    | 2886 |
| BHARK           | -----TTLCPFPFVFIGSGLDMSYQ--HPDLL-----N                   | 2879 |
| XENOPUS         | -----SLSYFPPFIGSGLDMSYQ--HDELL-----H                     | 2889 |
| STERLET         | -----TTVYFPPFIGSGLDMSYR--HKELL-----N                     | 2896 |
| GAR             | -----STLYFPPFIGSGLDMSYQ--YKELL-----K                     | 2893 |
| HUMAN           | -----TFSFPPFIGSGLDMSYQ--HAALL-----S                      | 2870 |
| PLATYPUS        | -----TVSFFPPFIGSGLDMSYQ--HTELL-----N                     | 2877 |
| TASDEVIL        | -----TMLFPPFIGSGLDMSYQ--HSELL-----S                      | 2881 |
| COELACANTH      | -----TTVYFPPFIGSGLDMSYQ--HAELL-----N                     | 2887 |
| CAECILIAN       | -----TTSYFPPFIGSGLDMSYH--HTELL-----N                     | 2889 |
| CANARY          | -----SLSYFPPFIGSGLDMSYQ--HRELL-----E                     | 2878 |
| OSTRICH         | -----SMSYFPPFIGSGLDMSYQ--HRELL-----E                     | 2848 |
| GECKO           | -----SVLYFPPFIGSGLDMSYQ--HKELL-----D                     | 2887 |
| TURTLE          | -----TVSYFPPFIGSGLDMSYQ--HRELL-----D                     | 2887 |
| ALLIGATOR       | -----SVSYFPPFIGSGLDMSYQ--HKELL-----D                     | 2845 |
| APLYSIA         | -----STHYFPPFIGSGLDMSYQ--VRSLL-----K                     | 2913 |
| TRICHOPLAX      | -----SKHYFPPFIGSGLDMSYQ--Q-KEL-----S                     | 2863 |
| SOFTCORAL       | -----STQYFPPFIGSGLDMSYQ--E-GKL-----S                     | 2883 |
| STONYCORAL      | -----STQYFPPFIGSGLDMSYQ--ECKLR-----S                     | 2912 |
| SEA ANEMONE     | -----STQYFPPFIGSGLDMSYQ--KSMLE-----K                     | 2866 |
| SEACUKE         | -----SSQYFPPFIGSGLDMSYQ--HSKEI-----S                     | 2886 |
| LANCELET        | -----SEKYFPPFIGSGLDMSYQ--EPRKL-----S                     | 2913 |
| STARFISH        | -----STQYFPPFIGSGLDMSYQ--HSEQL-----T                     | 2928 |
| SEA_URCHIN      | -----SNQYFPPFIGSGLDMSYQ--HSEQL-----T                     | 2910 |

Supplementary Figure 6 CLUSTAL OMEGA ALL PHYLA, EXPANDED

|                 |                                                                                          |      |
|-----------------|------------------------------------------------------------------------------------------|------|
| PARAMECIUM      | PENK-I VKKI T E P S L A Y Y G S M I L L E F C I L R L Q E D N E N                        | 2800 |
| TETRAHYMENA     | D-SN-I I K Q S L L S H S Y Y T S I L L I R E S L F S L F H R I D Q N E Q A G D K D V L   | 3012 |
| STYLNONCHIA     | E-AN-I I Q R N C O H S M S F Q T L A L I E S I I H G K I Q I D E Q F Q Q                 | 2972 |
| APHANOMYCEsa    | LSPD-I I G T S I S S R N L V T G R I L E L L I H S T D                                   | 2631 |
| APHANOMYCEse    | LAPD-I V G I S S I A S R N F T T G R I L E E I I R A A D                                 | 2564 |
| PYTHIUM         | ISAK-V V G S S L A S G L H S E L L I E F L T R G V A                                     | 2807 |
| PLASMOPARA      | LRPK-T I G D N G L S G N H H V S L A L E L L I Y E T Q L M                               | 2780 |
| BREMIA          | LRPE-T I G D N G L S G K Y H I C L A L E E I L T Y K I Q                                 | 2761 |
| AEDDES          | LPAE-G V T V Y S G N M M T M V L Y L E S K L H E Y D                                     | 2847 |
| MIDGE           | ISPD-V I V N I S V M N M M V T G V L F L E S Q L N Y L L N N E E N N E T D E I E E P Q Q | 2838 |
| BOMBUS          | CSPE-I T T K S R S S L A N F S L S V L E E N L I H E T N                                 | 2699 |
| ANT             | CDPR-D I V K S R A S H L A N T G A L I V E S L L P H V Q E D                             | 2765 |
| WHIPWORM        | FSPQ-D W A Y L A R S Q P D C S I L L I R C V E S G D I L E                               | 2804 |
| TRICHIANELLA    | FEPT-D I A N Y I G S Q P D C S I V L L E R R I E V G F V D I                             | 2808 |
| BEEFLE          | FPPE-L I V S V Q S S L R G L G A L I L E Y L I S C D V T E                               | 2675 |
| BARNACLE        | LPPA-L L A S V R L S G L P A C I M L L E R T L R Q P A A V E                             | 2733 |
| THRIP           | LDPH-L V A B V L G S N L L A L G V L L E A A                                             | 2752 |
| FLEA            | IGPD-V I S L V H T S Q L L S L G A L L E N R L N G E F                                   | 2753 |
| WHITEFLY        | LDPD-A V S T N Q A S G L L S L G T V V L E N Q I S A L S E S D                           | 2830 |
| TICK            | LPVD-A V A R S V A S G H Q S L G I L V L E E V Q R V R A                                 | 2792 |
| TERMITE         | LQAE-D I T T V S R F S G L L A T C C I L E E I L I Q K D                                 | 2841 |
| DAPHNIA         | MDSG-K I V H I L K G S H L Q A L C I L V L E S C F P D C P F P E                         | 2619 |
| OSTREOCOCCUS    | IPIS-D I V L I R R E S E L A S V V A L E S L I S S E K                                   | 2791 |
| STENTOR         | INAK-F V A S E L S R M C I Q S I L L E E C L L R Y D A N L                               | 2512 |
| KLEBSORMIDIUM   | VEAR-S I C D S L A S R M H Y H S C I L V E N Q L L D S Q S D E G                         | 2992 |
| CLUBMOSS        | IKPE-V A G S S Y N S Q N F H S I L L I E K Q I L H G T R P N L                           | 2711 |
| MOSS            | ISPK-I M G S S R K S T N Y H S I M L L E K Q I M N E T F P E P                           | 2859 |
| LIVERWORT       | IQPR-L I G O S L K S T N F H S I L L I E O E L L H E T F K E T                           | 2896 |
| LIGNANO         | SDYG-L V A A N S A S A H L P T L C A L A L E L L Y A W Q R G P G V Q Q Q                 | 3152 |
| COPEPOD         | LDTK-K I S N I L S G L E Q I C I L L E K Y L I Y R K D S A                               | 2748 |
| GLOBOSUM        | SSPS-L I S H V S A S N F E L C A L I I E K G L E D D L                                   | 2697 |
| PALUSTRIS       | CSPQ-L I F R S E G S A N S E L C I L L E K L A N D A P                                   | 2773 |
| NEOCALLIMASTIX  | IDTN-I L K T I G M S N N Q S T A I L L I E N I H L N H Q E                               | 2858 |
| GLOMUS          | IDPN-M I R K N G I S S T E S T C I L L I E R Q L L R T S                                 | 2915 |
| LOBOSPOR        | ISAE-L V A R S I R S S N Q H L C I L L I E K Q I Q E H G S                               | 2854 |
| SYNCEPHALASTRUM | IDST-V N N V S E R S E M Q H A I A V L E A Q L I S G A S E A                             | 2838 |
| FUNGIIVORUM     | VSPAF-L S A S E L S R M F H S I L L E E K O L S Y S Q N L                                | 2817 |
| HALBUM          | PSPA-S I A S S E N A S N H P M C I I V I S I I E S L L P T                               | 2973 |
| DURPUREUM       | PEFS-K I K D C L A S N N H P M I L L I E K L I L K L Q S H                               | 2945 |
| PVIOLACEUM      | PTYG-Q I T N I L K S N N H P M A I L L I E K L I N I V L N N                             | 2954 |
| AMPHIPOD        | ADPK-L I T N I L S G O E S L C I L L I E N V L M I R K D V                               | 2914 |
| SHRIMP          | TNPE-S I T A N G L S R L E A L C I L V L E R Q A L L S K R G E                           | 2882 |
| MUDCRAB         | VSPD-A L A A N G L G H L E A L G V L V L E R Q V L L S Q K G L                           | 2877 |
| TARDIGRADE      | VSAA-A V T S N A K S S O P N L C I A V L E N A I L L Q S A                               | 2916 |
| HYDRA           | LEPQ-V V S S S I I S L Q O P T C I L L I E K Q L I S L K N N I                           | 2780 |
| SALPINGOECA     | VSPM-T V S L S A A C R S F H T C A L L L E S T L A A A E E E A                           | 2916 |
| SPIDER          | FDVE-T V F R N G I S S Q O S T C I L L I E T Q L L D G L T V                             | 2883 |
| LIMULUS         | LEPE-E V S R V Q A S G Q Q M C I L L L E E I L I K S T T E E                             | 2934 |
| SCORPION        | IDYE-Q I C T S O S H K Q S L C I L L E D H L I C A N F K                                 | 2898 |
| ROTIFFER        | LDPG-L V S E L A S F R O S I C I L L I E Y I I M F E E D S                               | 2835 |
| CIONA           | LIPA-H I S S S L A S N K H A L C I T L L R O Y I I D D K H S V                           | 2920 |
| OCTOPIUS        | IDIKQ I S S S I T K L Q P L A I V L E Q I I K G M N S C                                  | 2851 |
| CAPITELLA       | LQPG-V V S V N V N S D Q O P L C I L L I E G L L H S P E                                 | 2895 |
| LIMPET          | ISPS-N I S T S I V S S L O P L C I V V L E Q L I Q T D S                                 | 2874 |
| SCALLOP         | VDVT-S V G S S T F S N L Q P L C I V V L E Q L I H N P                                   | 2937 |
| LINGULA         | LEPS-A V D T S L I S M Q O P L C I V L L E Q L I R D G S                                 | 2901 |
| OYSTER          | VDVS-D V S S N M F O N I O P L C I V L E Q L I S Q D E                                   | 2894 |
| SNAIL           | VEVS-E L S I N K I S N L Q P L C I V I E R L I T E D S                                   | 2905 |
| SPONGE          | IKPP-S I T T S S L A S K Q E F T C I M L L E K Q L L A N V D                             | 2928 |
| PRIAPULA        | LDPA-V V T V S Q T S M Q O M L C I V L L E K M L M Q G A C D D                           | 2943 |
| DANTIO          | VEPS-L V S A S C L A S L Q O P M C I L L L E S L L H G A G A S                           | 2918 |
| ESHARK          | LDST-S V S S S L A S L Q O P M C I L L E K S L I H S T T N                               | 2924 |
| BHARK           | LDPN-I V S S S L A S L Q O P M C I M L L E S L M H L S L P                               | 2917 |
| XENOPUS         | LNPA-N I S T S L A S L Q O P L C I L L L E K G L L H M K V P                             | 2927 |
| STERLET         | IEPS-S V S S S L A S L Q O P M C I L L E S L I K G L V P                                 | 2934 |
| GAR             | VDPS-A V S S S L A S L Q O P M C I L L L E S L I R G S V P                               | 2931 |
| HUMAN           | LDPA-A V S A C L A S L Q O P V G I R L L E A L L R L L P A                               | 2907 |
| PLATYPUS        | LDAN-C V S T S C L A S L Q O P V G I L L L E Q A L I R L G P P                           | 2915 |
| TASDEVIL        | LDST-T V S T S C L A S L Q O P V G I L L L E K A L I H L T P A                           | 2919 |
| COELACANTH      | LDPA-S V S A S C L A S L Q O P M C I L L L E Q L I Q L L A A                             | 2925 |
| CAECILIAN       | LDPN-N V S T S C L A S L Q O P V G I L L L E R S L M S L V D T                           | 2927 |
| CANARY          | LDSA-N V S T S C L A S L Q O P M C I L L L E R A L M A L S P A                           | 2916 |
| OSTRICH         | LDSA-N V S T S C L A S L Q O P V G I L L L E H A L I S L S P A                           | 2886 |
| GECKO           | LNPS-S V S S S L A S L Q O S V G I L L L E Q A L V H L S S E E                           | 2926 |
| TURTLE          | LDSA-T V S T S C L A S L Q O P M C I L L L E Q A L T R L S S E                           | 2925 |
| ALLIGATOR       | IDST-S V S T S C L A S L Q O P V G I L L L E Q A L I H L S T P I                         | 2883 |
| APLYSIA         | APAS-E V G V S I V S N Q O T L S M V V L E Q L I Q A S S A Q                             | 2952 |
| TRICHOPLAX      | IQSS-F A S V S L A S S O O P I C I L L I E K Q I M H L D                                 | 2900 |
| SOFTCORAL       | LEAG-K V T T I G S L Q O P T C I M L L E K Q I L Q M A E D P                             | 2922 |
| STONYCORAL      | VDSA-S V S T N L S L Q O P I C I M L L E K Q L L E I E G                                 | 2950 |
| SEA ANEMONE     | VQPS-S V S T S L A S L Q O P M C I L L L E K Q L L S Q E                                 | 2903 |
| SEACUKE         | LDPV-T V T V S L T S K Q I H L C I R V L E E M L I K K S W                               | 2924 |
| LANCELET        | PDAS-V I O O N V I S L Q O P I C I V L L E E Q L V K R A G                               | 2951 |
| STARFISH        | LVPS-T I S T S L T S Q O M H T C I R L L E E N L I Q K P W                               | 2966 |
| SEA URCHIN      | LDPA-A I S O S L T S R Q L L I C I R V L E E V L I K K S G                               | 2948 |

Supplementary Figure 6 CLUSTAL OMEGA ALL PHYLA, EXPANDED

|                 |                                                         |      |
|-----------------|---------------------------------------------------------|------|
| PARAMECIUM      | -----QFIRKSPFFM                                         | 2810 |
| TETRAHYMENA     | LKNQKASRARGKEMQIGEDDYEDKLDENEEDLEEEERLLYESRKKQSEKRLVNYM | 3072 |
| STYLONCHEIA     | -----AMGQGNKKRRIQDMSG-----QNKNGTGFMPN-----KVLGDKRKYF    | 3012 |
| APHANOMYCEsa    | -----ENVTSAFN                                           | 2640 |
| APHANOMYCEsa    | -----SRIVSMAN                                           | 2573 |
| PYTHIUM         | -----SSADVTAEAAD                                        | 2818 |
| PLASMOPARA      | M-----KLKSNESLVECD                                      | 2794 |
| BREMIA          | T-----DLELNLVTVNC                                       | 2775 |
| AEDES           | SISRR-----SSSVTLEALHI                                   | 2864 |
| MIDGE           | KRIKL-----DMNDDIKLHHIL                                  | 2855 |
| BOMBUS          | KKIR-----RKYADSSSKVL                                    | 2715 |
| ANT             | KRMH-----SDNYICNEETSKE                                  | 2784 |
| WHIPWORM        | RRLSD-----DSDSSMPLESAIT                                 | 2822 |
| TRICHINELLA     | KRLKQ-----VNETDRLAV                                     | 2822 |
| BEEBLE          | R-----GNQLSQDTNLI                                       | 2688 |
| BARNACLE        | KRPRLGLPP-----PAAEPARDRRLS                              | 2756 |
| THRIP           | -----ATWNVNVL                                           | 2761 |
| FLEA            | KRSTI-----EDNDEYNHL                                     | 2768 |
| WHITEFLY        | KRQL--DR-----MDETNLTEEANIIF                             | 2851 |
| TICK            | KRTRK-----EAAQACGPI                                     | 2807 |
| TERMITE         | KSKTF-----EPSTEIIL                                      | 2856 |
| DAPHNIA         | KPKRQ-----EVKHQSSVF                                     | 2634 |
| OSTREOCOCCUS    | -----DGSSETF                                            | 2799 |
| STENTOR         | AQSGTE-----KPEVTRKNSFVI                                 | 2531 |
| KLEBSORMIIDIUM  | R--SKRQKGRGQ--AVP-----RGQGESEGEQETVI                    | 3022 |
| CLUBMOSS        | A--AKRHRGFSVQ--TSQ-----D--NAVTEEANL                     | 2735 |
| MOSS            | S--SKRQKGGGQ--ANR-----L--PRPLEDANL                      | 2883 |
| LIVERWORT       | S--SKRQKGAAGK--VMK-----E--QRNMQEANL                     | 2920 |
| LIGNANO         | LPTA--AKRRRMEAGSQESNDNSA-----DVGTHADRHEEAYL             | 3191 |
| COPEPOD         | KKKKIT-----SQDQKVEYLI                                   | 2765 |
| GLOBOSUM        | TKKLTFF-----NRVAVRKSPEAVV                               | 2716 |
| PALUSTRIS       | KRSRTGR-----NASKKQSEIEFV                                | 2792 |
| NEOCALLIMASTIX  | KSQ-----SIDSDNKRLLN                                     | 2873 |
| GLOMUS          | KRLRTTS-----SSLVASSKRPI                                 | 2934 |
| LOBOSPOR        | KRLKTSG-----ATSHDPKRGSI                                 | 2873 |
| SYNCEPHALASTRUM | KRKRITGG-----SADLHRSKVQI                                | 2857 |
| FUNCTIVORUM     | G-----KTERDGEIA                                         | 2827 |
| HALBUM          | KQYQN-----QATISESD                                      | 2988 |
| DPURPUREUM      | KQO-----EKDINSGD                                        | 2957 |
| PVIOLACEUM      | KTPDD-----NRVIDDAN                                      | 2969 |
| AMPHIPOD        | KRQKRGVTS-----LAQSEDDVPKLM                              | 2938 |
| SHRIMP          | KMKRKA--E-----AL--SQDSSLIL                              | 2900 |
| MUDCRAB         | KKLK--TH--L-----NS--QLDSTVI                             | 2894 |
| TARDIGRADE      | KRARQK-----ASVKADYIL                                    | 2931 |
| HYDRA           | KRLRAD-----SQQENYMWIS                                   | 2796 |
| SALPINGOEA      | KRSKMRRAR-----NGLTDDEIERI                               | 2937 |
| SPIDER          | KKIRHE-----KHIFTQESNYM                                  | 2901 |
| LIMULUS         | KKARRE-----NRSNSPATSLI                                  | 2952 |
| SCORPION        | KRIKLN-----KPLISDELISIL                                 | 2916 |
| ROTIFFER        | KKVLN-----PKDSSSEASTIL                                  | 2854 |
| CIONA           | KKQKTH-----VSGMGNPVLHI                                  | 2938 |
| OCTOPUS         | KRPQRS-----LNPPPTDVSTL                                  | 2869 |
| CAPITELLA       | KRSRRD-----RSSRIQTDTPEL                                 | 2914 |
| LIMPET          | KRRKTE-----GTTVSTDVNLI                                  | 2892 |
| SCALLOP         | KRGRTD-----TLTISKEVPTI                                  | 2955 |
| LINGULA         | KRARTS-----ATVPSQESTVL                                  | 2919 |
| OYSTER          | KRGRSD-----NAVVSTDTLSI                                  | 2912 |
| SNAIL           | KRSRYD-----VTPVTKDDMI                                   | 2923 |
| SPONGE          | KRSRTN-----KSNEVTETI                                    | 2944 |
| PRIAPULA        | KMRA--G-----SGMGVSHQHTDI                                | 2962 |
| DANTO           | KRARG--K-----RELPPDT--ERI                               | 2935 |
| ESHARK          | KRARG--R-----RELPPDTVARI                                | 2943 |
| BHARK           | KRSRG--R-----TQLPPDT--ARIV                              | 2934 |
| XENOPUS         | KMKRKEKEK-----AEIPDDI--VRHI                             | 2947 |
| STERLET         | KRARG--R-----RELPPDT--ARI                               | 2951 |
| GAR             | KRARG--H-----RELPPDT--ERI                               | 2948 |
| HUMAN           | KRVRG--K-----ARLPPDV--LRIV                              | 2924 |
| PLATYPUS        | KKRRG--K-----PQLPPDV--VRHI                              | 2932 |
| TASDEVIL        | KMRG--K-----PQLSPDV--IKHI                               | 2936 |
| COELACANTH      | KRARG--R-----KELPPDT--IRIL                              | 2942 |
| CAECILIAN       | KMRG--K-----TELSPDV--VRHI                               | 2944 |
| CANARY          | KMRG--R-----TELSPDV--IRHI                               | 2933 |
| OSTRICH         | KRVCG--R-----RELPPDV--IRHI                              | 2903 |
| GECKO           | KMRG--K-----TELSPDV--IRHI                               | 2943 |
| TURTLE          | KMRG--R-----ALSPDV--IRHI                                | 2942 |
| ALLIGATOR       | KRMCG--R-----TELSPDV--IRHI                              | 2900 |
| APLYSIA         | KRARRE--A-----E--TLDADTVLHI                             | 2970 |
| TRICHOPLAX      | KRIKTS--S-----ASEATSNHI                                 | 2916 |
| SOFTCORAL       | KRQKTG--G-----N--PSPSTATI                               | 2940 |
| STONYCORAL      | KRAKTS--T-----V--PPSEVTICHI                             | 2968 |
| SEA_ANEMONE     | KRMRTS--H-----S--PSSDTTAAHL                             | 2921 |
| SEACUKE         | KRSKTS--H-----R--ETTREISTHI                             | 2942 |
| LANCELET        | KRARTS--S-----S--PVSAETATHI                             | 2969 |
| STARFISH        | KRARFV--S-----R--EPSPEISTHI                             | 2984 |
| SEA_URCHIN      | KRARTS--R-----P--ESNQEMSTHI                             | 2966 |

Supplementary Figure 6 CLUSTAL OMEGA ALL PHYLA, EXPANDED

|                 |                                                         |      |
|-----------------|---------------------------------------------------------|------|
| PARAMECIUM      | DIMDLHQSGCNKAOLEFHINELPKDKP-----AFDS---IKQAMD-----      | 2847 |
| TETRAHYMENA     | DLIDLSHLNKQOLKCLLKKTVSHEG-----QKDM---IVALDLKFSKIQNSL    | 3119 |
| STYLONCCHIA     | NLIDLVDQIGNDALQCLWFLADEEG-----IIFK---VKDQEKLSQOERNV     | 3059 |
| APHANOMYCEsa    | QLHHVLQMVENEPIYLLALATHE--ST-----VPET---TLAVEAQLKDLVAIL  | 2684 |
| APHANOMYCEsa    | QLHHVLQMVENEPIYMLLAET--CV-----LSET---NLALHAQLSCLVAMI    | 2617 |
| PYTHIUM         | HLVKLLATOKSLLTALAKSC--CV-----TDSD---KLALEARLADLPGAI     | 2862 |
| PLASMOPARA      | LLHKLLSTLHKRFVLLALAC--ST-----NADS---KRALQQLSCLPLAI      | 2838 |
| BREMIA          | LLHKLLGTVRKRFLLALAC--ST-----IPES---KQALEAQLSCLPLAI      | 2819 |
| AEDDES          | KLAEHLHALNEYDILGDIYSDK--MD-----SD-PRL---REALEESGNIPYKR  | 2909 |
| MIDGE           | KLIELLYKMEYEVLAGHTEK--LN-----LN-PETRHQLIKAIYDYESNRFPDN  | 2904 |
| BOMBUS          | LLTNVLRKSMNDVTVLSSHQNH---I-----TM-KDM---QLASFAQVSKKERK  | 2759 |
| ANT             | QLASLRSKLDVTVLSSHQGR--QF-----FG-QDV---QBALAEVSDITRK     | 2829 |
| WHIPWORM        | SLGRLLKALGGLNLRRETFETH--LQ-----VS-EYT---KLALKLEYVDLEKVV | 2867 |
| TRICHINELLA     | ELARLVKQCGELLENLKVTKH--LL-----TT-EKT---KLALEMEAADLEGNA  | 2867 |
| BEEFLE          | KLAEVLKEMEWEVVKSTLEK--TQ-----CP-QEV---KNALAEASQKQKDR    | 2733 |
| BARNACLE        | VLAELVQVYGDORSARALGR--AD-----LA-ADW---SAALAEARDFLEA     | 2801 |
| THRIP           | HLAELVDGLGERVAHSTLLHN--VP-----LD-KTA---KDALVAHAEPVLRK   | 2806 |
| FLA             | KLAVLQSMADYDTTQCFMKA--LE-----CN-EDF---ARGLELEYSCLYMM    | 2813 |
| WHITTEFLY       | KLAEVYSLSESVDVLCITRDK--LT-----NGNVDL---IKATEKQLDQGR     | 2897 |
| TICK            | QMAQLVRSKLDGYTVRVLSCS--ED-----VD-AKA---KEALQKEAQCDSGR   | 2852 |
| TERMITE         | SLADLVKHMDEWVVRGTFHKY--LN-----CG-ENV---HKALKWETSHPDKR   | 2901 |
| DAPHNIA         | HVANLVGDQINQVNRVVAHL--TD-----C-KEST---KKAIESESKHWRP     | 2679 |
| OSTREOCOCCUS    | ALATLCKSLGHDNMLCLVNA--FP-----M-QSDT---MVAIEEMTSLQNSA    | 2844 |
| STENTOR         | ALTKVLRKMGDSANLKVVI--FKSK--SP-EMNDTI---RKALDFYSEELIKT   | 2591 |
| KLBSORMIDIUM    | QLARLREIGEDIVLSEVQEK--VA-----R-LEST---REALOALSDITRM     | 3067 |
| CLUBMOSS        | ELARLVNAIGEDVVLSELNLR--LT-----T-QSIS---HOALESQVRDRL     | 2780 |
| MOSS            | ELAEVLKALGENDIVLCLGTH--VA-----K-HEKT---RRALEIQLGDLRQL   | 2928 |
| LIVERWORT       | ELAHLVKELGEEIVLSEVQK--LT-----E-KPIT---QKALEAQLGDPGRCL   | 2965 |
| LIGNANO         | ALARLVDRMGEPDQCALRRCSRHNQEGVDNNDDEER---FNALDWCLSDVQLAL  | 3247 |
| COPEPOD         | HLSDLVRTAGEHENVKCLIQNSHEMN-----V-HEDT---KSALNFEANGVSEAL | 2813 |
| GLOBOSUM        | SLAQLVKELQHVYVESIVESR--VA-----Y-SLVT---KEAISAEELDFETK   | 2761 |
| PALUSTRIS       | QLARLVRSMMNVVYRDLVETR--VS-----S-NHVV---KEATTAESLQDRL    | 2837 |
| NEOCALLIMASTIX  | NLAQLVRSKIGENIYRNIRESK--IK-----A-NQSL---KDALTEEVLCVQDL  | 2918 |
| GLOMUS          | ELSHLVKSDIGDGVVNSIVESK--IV-----V-SELT---KDALNAELADYALAC | 2979 |
| LOBOSPOR        | ELARLVKSTDEKOVVKSIVETK--VA-----T-TEFT---KQALEAEVVDVDRV  | 2918 |
| SYNCEPHALASTRUM | DLASLVKSVDEAIFQSLVNH--VA-----S-NDSA---KDAVESMRADVVEH    | 2902 |
| FUNCTIVORUM     | ELMKLVRALGDVTRKCHENK--LA-----H-TDIS---KQALAEYSBELLT     | 2872 |
| HALBUM          | HIRELVHALKEEDIVLSEALERQ--MG-----E-LPYT---KRALEAELSQVAIL | 3033 |
| DPURPUREUM      | NIRELVKSLKEEDILMLSEKQ--MS-----D-IPPT---KKALEFELKQVWNL   | 3002 |
| PVIOLACEUM      | SLRELVRALKEEDILMLSEKQ--SS-----T-SEYT---KKALEFELKQVWNL   | 3014 |
| AMPHIPOD        | HLAELVSSLGMWDAVRGVLOSS--MS-----SLHGNT---REALHCESLKPLENY | 2984 |
| SHRIMP          | STAEVYKLNLMNDVVRGVVQK--LG-----AIKEET---QKALEAEATNVHVQF  | 2946 |
| MUDCRAB         | NMAELVKNLSMWVVRGVIHSHK--LG-----RIKPET---REALAEATNSVQF   | 2940 |
| TARDIGRADE      | GMVQLQSDGQDTSLAGLIDT--VF-----KRSDEV---LSAIQMEARGAHDAA   | 2977 |
| HYDRA           | ELAKLVTSKDFVDSVITCSQ--IS-----T-NDVV---KRALAEATNDYSTL    | 2841 |
| SALPINGOBECA    | YLGRLVKELGDYDTLHCITSNQ--VL-----S-FEAT---QARLEAARDFDEBA  | 2982 |
| SPIDER          | KLAEVRSINQVVRVCHISLT--MG-----K-RDDN---KRALQHECLQVFEBA   | 2946 |
| LIMULUS         | RLAEVRSKLNMYDVVRCHISSS--VN-----T-QTES---QALEFEARQVTKL   | 2997 |
| SCORPION        | KMAELVKSLSDFVHCHISNS--LN-----I-QEET---QALEFEARQVTKL     | 2961 |
| ROTIFFER        | ELAKLVRSMDVDSKCHILVK--SD-----LVCEHT---ERCIQFEARQVTKL    | 2900 |
| CIONA           | ELARLVKSLDEFVLRCHISGD--SE-----S-NKST---AKGALAEEDVTPAY   | 2983 |
| OCTOPUS         | ELAKLVKSINEYVSLCHIKDN--VG-----C-QEVS---KMAIKAEIRQVSEAI  | 2914 |
| CAPITTELLA      | ELAKLVKSISDYVLRCHISQ--IG-----S-KPAT---RLAIEAETRDVRSNL   | 2959 |
| LIMPET          | EMARLVKSVENYVLRCHISGK--ID-----T-KPIT---QEMAMESKDYQTN    | 2937 |
| SCALLOP         | ELARLVKSVDEYVLRCHITGK--IG-----T-QDIT---QKAVSFEARQVYQK   | 3000 |
| LINGULA         | ELARLVKSLGDFVVRCHISSK--IG-----T-KKIT---QDAAEASRDYKTS    | 2964 |
| OYSTER          | ELARLVKSVKEYVLRCHISGR--IG-----T-QDIT---KEAVQMEARQVYKVV  | 2957 |
| SNAIL           | ELAKLVKSLGDFVLRCHISGM--LK-----T-KEVT---QLALIEESHSEKAI   | 2968 |
| SPONGE          | ELARLVKSLGDYVLRCHITNL--DD-----T-KDVT---RKALEAERQVLTML   | 2989 |
| PRIAPULA        | ELARLVKSLGDYVLRCHINDK--IG-----T-QTCT---QALQAEASDYKLR    | 3007 |
| DANTO           | HLAKLVRSKLDGYDVVRCHISGK--IG-----T-KSIT---FTALQAEAKDYAEV | 2980 |
| ESHARK          | ELATLVRSKLDGYVLRCHISEK--IG-----T-KPIT---QKALLAEAKDYAEV  | 2988 |
| BHARK           | ELAKLVRSKLDGYVLRCHISEK--IG-----T-KSTT---QKALLAEAKDYAEV  | 2979 |
| XENOPUS         | ELAKLVRSKLDGYVLRCHISGK--IG-----A-KSIT---QCALNAAEKDYAKA  | 2992 |
| STERLET         | HLAKLVRSKLDGYVLRCHISGK--IG-----A-KSIT---SMALQAEAKDYAEV  | 2996 |
| GAR             | HLAKLVRSKLDGYVLRCHISGK--IG-----A-KPVT---SLALQAEAKDYAEV  | 2993 |
| HUMAN           | ELAKLVRSKLDGYVLRCHITSE--IG-----T-KQIT---QSALLAEAKDYSENA | 2969 |
| PLATYPUS        | ELAKLVRSKLDGYVLRCHISGE--IG-----T-KHVT---QIALLAEAKDYSENA | 2977 |
| TASDEVIL        | ELAKLVRSKLDGYVLRCHISGE--IK-----T-KPVT---QKALLAEAKDYSENA | 2981 |
| COELACANTH      | ELAKLVRSKLDGYVLRCHISGM--IG-----T-KQVT---QKALLAEAKDYSENV | 2987 |
| CABILLIAN       | ELAKLVRSKLDGYVLRCHISGK--IG-----T-KPHT---KDALAEAKDYATBA  | 2989 |
| CANARY          | ELAKLVRSKLDGYVLRCHISGK--IG-----T-KEIT---QKALLAEAKDYATBA | 2978 |
| OSTRICH         | ELAKLVRSKLDGYVLRCHISGK--IG-----T-KEIT---QKALLAEAKDYATBA | 2948 |
| GECKO           | ELAKLVRSKLDGYVLRCHISGR--IG-----T-KEVT---QKALLAEAKDYAEV  | 2988 |
| TURTLE          | ELAKLVRSKLDGYVLRCHISGK--IG-----T-KEIT---QKALLAEAKDYAEV  | 2987 |
| ALLIGATOR       | ELAKLVRSKLDGYVLRCHISGR--IG-----T-KEIT---QKALLAEAKDYAEV  | 2945 |
| APLYSIA         | ELSRLVKSLGDFVLRCHISDK--LG-----T-KDVT---RTALEAERQVKAAL   | 3015 |
| TRICHOPLAX      | ELSKLVKSLGDFVLRCHISGH--LG-----T-KDIT---QKALEAERQVAAV    | 2961 |
| SOFTCORAL       | ELSKLVKSVDFVLRCHISNSH--IG-----T-QSIT---KDALEAERQVTEAL   | 2985 |
| STONYCORAL      | ELSKLVKSVDFVLRCHISGH--IG-----T-KDIT---REAMEAERQVSOAL    | 3013 |
| SEA ANEMONE     | ELAKLVRSVEEFVLRCHISDH--IG-----T-KPIT---RLALEAERQVAAAL   | 2966 |
| SEA CUCUR       | ELARLVKSLGDFVLRCHISGK--ID-----S-HEIT---HSALQAEARQVAAAI  | 2987 |
| LANCELET        | ELARLVKSLGDFVLRCHISGR--VG-----T-QTVT---YEALAEARQVKKVV   | 3014 |
| STARFISH        | ELARLVKSLGDFVLRCHISGK--IG-----T-HEIT---KTALAEARQVSTL    | 3029 |
| SEA URCHIN      | ELARLVKAMGDFVLRCHISGAL--IK-----T-KDVT---QKATQAESRDYSENL | 3011 |

Supplementary Figure 6 CLUSTAL OMEGA ALL PHYLA, EXPANDED

|                 |                                                             |                                              |      |
|-----------------|-------------------------------------------------------------|----------------------------------------------|------|
| PARAMECIUM      | -YKHQYSYVRANQ----                                           | OLE-ELLDEINQEGYDEDTIDGRMVHYLQQEFPEDTCMKLGQWE | 2901 |
| TETRAHYMENA     | KILKEIISKNKESERQNFMAIEDNINNOVS---                           | LDRIQEQYIQSEYQDTLALMGKWD                     | 3175 |
| STYLNONCHIA     | NLIKBAHCLRTKGSIDKGLK-VLEQAL-NDKSLTDCLEDHILCELENKQDSKAELLKWD |                                              | 3117 |
| APHANOMYCESa    | QHYKDAEAKYAS-M-----                                         | DN-A-----NVTILLERQWKEQGFHCLATLNRWD           | 2725 |
| APHANOMYCESa    | QHYKDAEGKFKL-L-----                                         | DKSQ-----DVSLLQQRWKEQYINCLATLNRWD            | 2659 |
| PYTHIUM         | ASYRKAESVLTIS-E-----                                        | WETEP-DFAVAQAQFANRCYWERLQCLTELNRWD           | 2909 |
| PLASMOPARA      | AAYKKAESTLRL-Q-----                                         | MELLD-GDDFVIAKNDAMRCRQRLNLCMETLNSWH          | 2885 |
| BREMIA          | SLYKKAESTLHS-Q-----                                         | MECLD-DATVVSVKADAVRCRQRYKCLTELNRWE           | 2866 |
| AEDES           | EIYLQMIKD-N-Q-----                                          | A-----R-VAEQNFCQSYFNCAQMGWWE                 | 2944 |
| MIDGE           | GIYDKLIHQ-N-L-----                                          | W-----RNTSEKEFYQSKFFCLEKLSDWK                | 2940 |
| BOMBUS          | LAYEAYG---T-E-----                                          | S-----ELMKHCLQGLFECLSNLCSSH                  | 2792 |
| ANT             | WAFTHAYER-T-E-----                                          | D-----PLIKHECLRGLLEAANLDCWS                  | 2863 |
| WHIPWORM        | SVYTEALSK-L-D-----                                          | DSNQ-----SSLYLAETDLWEESRLECLNELSDWN          | 2908 |
| TRICHINELLA     | TIYGETFSN-K-Q-----                                          | SKSG---DIVEKAESNLLYEARIRCLEMLNDWK            | 2908 |
| BEEBLE          | DLYQSLLET-D-D-----                                          | V-----IERKDFYDSYFKCFPHLGAWN                  | 2767 |
| BARNACLE        | RHYEQTLRR-G-E-----                                          | D-----HLSDQAYFQCLSELSEWQ                     | 2831 |
| THRIP           | QQYFVALKD-T-K-----                                          | Y-----DNFYESCFCMALLSDWD                      | 2836 |
| FLA             | KCYERVVSG-T-T-----                                          | SA-----INETERQPHKECYFNSFAKLGHW               | 2850 |
| WHITEFLY        | RHYFEVYKD-E-T-----                                          | Y-----SEKQRFVTQSYFKCTALCSNWN                 | 2932 |
| TICK            | DAYRNLSV-----                                               | SGSIWDDAVLQCCRLGGEWT                         | 2880 |
| TERMITE         | MEYEAALS-S-M-D-----                                         | D-----QDGLSDYYEALYKCLLAHLSDWK                | 2936 |
| DAPHNIA         | EFYSQVFK--SD-----                                           | TPSSAEMNFCDEYRLKCLEELGQWD                    | 2714 |
| OSTREOCOCCUS    | NIYKNLLHNVDD-----                                           | DQSPREREFWTHIEYFPCAEPLGQWD                   | 2881 |
| STENATOR        | DEFLKIDNSDA-----                                            | D-----DKQEMRDLLECAGSLQWE                     | 2614 |
| KLEBSORMIDIUM   | QGYDKALMEMDE-----                                           | MDQD-----SGTYSKLEADVCYNQRLCELSLFRWQ          | 3110 |
| CLUBMOSS        | VLYDKALNETP-----                                            | EGTASKEEDLWYNYORLACLVDLFRWQ                  | 2818 |
| MOSS            | DLYDQVIAIYE-----                                            | DGSLSGDITKSEIDWYNYORLACLADLNEWE              | 2970 |
| LIVERWORT       | ILYDQALDVTDE-----                                           | DSGSYGDQATQVEQDIWYNYORLACLDLNWNQ             | 3009 |
| LIGNANO         | ATFDRLFRQADE-----                                           | SGTESASAAADSATAVNNACLARLDCLTRLADWS           | 3294 |
| COPEPOD         | KVYKNLVENL-N-D-----                                         | LQE-----NHLKQEVDIWQKGYQSQSKLGKWD             | 2852 |
| GLOBOSUM        | NKYLEGLGSE-----                                             | N-----LDVSEAEQLQWTTQRLECMNKLGEWS             | 2798 |
| PALUSTRIS       | RAYQALETE-----                                              | E-----KLEHEADICHRGLVECLNKLGLWD               | 2873 |
| NEOCALLIMASTIX  | NIYSNTLENL-----                                             | N-----QTTDEYEVSLCEQGRLECYNKLGSWS             | 2955 |
| GLOMUS          | KHYLEALKS-----                                              | E-----ADVDDIEVALWEERRFDCFEKLCQWD             | 3015 |
| LOBOSPOR        | KVYFDGITKH-----                                             | FANE-----IHVDVDEQSIWAHGRLECEHLGQWD           | 2958 |
| SYNCEPHALASTRUM | ERFMDAFGR-----                                              | FEN-----EADSRLELWQKELRCLCEQLAQWD             | 2939 |
| FUNCTIONORUM    | AEYERKTKLDEGA-----                                          | RKGE-----EKISPTAEIDIWENRLECEPMLARWD          | 2918 |
| HALBUM          | KAYDDGMAALESQ-----                                          | LA-----I-TPSARETSLWENGRLCQYESLREWS           | 3075 |
| DPURPUREUM      | KVYDEATSKLEQQ-----                                          | LN-----QPHLSESETSLWENGRLECYAKLGNWN           | 3045 |
| PVIOLACEUM      | KTYDEATLKLLEGA-----                                         | IT-----N-----ITDAETNLWENGRLOCLTKLRNWT        | 3055 |
| AMPHIPOD        | KFYLSALS--SP-E-----                                         | V-E-----QSSEEQIWEERLCATASELGMWG              | 3021 |
| SHRIMP          | LLYRQSLD--TT-D-----                                         | WEEE-----PLAAENRLWEEWYNSCAAILGQWS            | 2985 |
| MUDCRAB         | IYRTALN--T-Q-----                                           | WPEE-----PDPAEVHLWEECYASCAAKLGQWS            | 2978 |
| TARDIGRADE      | DLYQQLIN--TR-----                                           | -----DDSTLAVLQESHIRCLNELGNWK                 | 3011 |
| HYDRA           | H1YRKAASQ--KE-N-----                                        | WEIT-----PSYEEEEYDWTARLRCYENLGMWT            | 2880 |
| SALPINGOBECA    | EYKKECMP--KEED-----                                         | EEDD-----DVPACEVDLWEDTLAECSLRLCDWG           | 3023 |
| SPIDER          | MLYNKLYE--EA-----                                           | SD-----EHDQAEKDFWDSVIANLNLKLSKWE             | 2983 |
| LIMULUS         | QLYIQLYE--KT-V-----                                         | WPKD-----EPEQAEMDLWDAILKCYDSLTRWD            | 3037 |
| SCORPION        | KIYSKLYD--QT-E-----                                         | WSAE-----EPNQAIEDLWDNALCQYDYLQWD             | 3001 |
| ROTIFFER        | NEYGALD--S-E-----                                           | LLE-----NVSQSQQLWLESLLKCCNELTDWK             | 2938 |
| CIONA           | KVYNEALH--KE-D-----                                         | WEND-----VSEVEKDWEDCLINCFKNLARWD             | 3022 |
| OCTOPUS         | KHYVTAIE-----                                               | -----LSTKEELCTWHHCYIQCLENLSRW                | 2947 |
| CAPITELLA       | QLYNESLA--KE-E-----                                         | WDDG-----EHPTEAENIMWDSRIECAENLTQWR           | 3000 |
| LIMPET          | KLYDEALS--IQ-D-----                                         | WAGE-----DPLEAIEDFWDSDRMQCLDHLTQWK           | 2977 |
| SCALLOP         | KLYDEALGYSDS-D-----                                         | WPDG-----NPEMAEVDLWDDCRMECLDNLTNWN           | 3042 |
| LINGULA         | HLYREARQ--CD-S-----                                         | WTDG-----EPDGLEQELWVDAYLLCVDQLMSWE           | 3004 |
| OYSTER          | KLYNQALS--CN-D-----                                         | WDEN-----PPTIEVDMWDESMECLDNLSQWK             | 2996 |
| SNAIL           | ALYNKALE--SA-D-----                                         | H DPR-----PLEAEIDLWDESMECLNRLTEWT            | 3007 |
| SPONGE          | NLYKKAID--F-D-----                                          | WPGQ-----ESPQQEEDLWEDSLNAYSHLTQWK            | 3029 |
| PRIAPULA        | KLYQRALE--M-E-----                                          | WGES-----EGPQQGERLDWISLMLQCLDRITDWT          | 3047 |
| DANTIO          | KLYNEALN--KE-D-----                                         | WDDG-----EPTITEKDFWELAALEYNHLTEWK            | 3020 |
| ESHARK          | RLYDQALN--TE-E-----                                         | WMDG-----NPMETEKDFWELAALEYNHLTEWK            | 3028 |
| BSHARK          | QLYDQALN--TE-E-----                                         | WVDG-----NPTDAEKDFWELAALEYNHLTEWK            | 3019 |
| XENOPUS         | KLYDEALT--E-T-----                                          | FSDG-----DPTDAEKDFWELAALEYNHLTEWK            | 3031 |
| STERLET         | KLYNEALN--TE-E-----                                         | WTDG-----EPAAEKDFWELAALEYNHLTEWK             | 3036 |
| GAR             | KLYNEALN--TE-E-----                                         | WMDE-----GPTDEKDFWELAALEYNHLSEWK             | 3033 |
| HUMAN           | KQYDEALN--KQ-D-----                                         | WVDG-----EPTAEKDFWELASLDCYNHLAEWK            | 3009 |
| PLATYPUS        | KQYNEALN--MQ-H-----                                         | WEDG-----EPSEAEKDFWELAVLECYNHLTEWK           | 3017 |
| TASDEVIL        | KQYNEALN--TQ-E-----                                         | WLEG-----DPTAEKDFWELAALEYNHLTEWK             | 3021 |
| COELACANTH      | RLYDEALN--VE-E-----                                         | WPDG-----EPTAEKDFWELAALEYNHLTEWK             | 3027 |
| CAECILIAN       | KLYDEALN--MP-D-----                                         | WNSD-----EPTAEKDFWEVAALCYNRLTEWK             | 3029 |
| CANARY          | QYDKALS--QE-D-----                                          | WQDG-----EPTAEKDFWELASLECYDHLTMWK            | 3018 |
| OSTRICH         | KHYDEALS--KE-D-----                                         | WQDG-----EPTAEKDFWELASLECYDHLTEWK            | 2988 |
| GECKO           | KQYDEALS--KQ-D-----                                         | WPDG-----EPIEAEKDFWELASLECYDHLTEWK           | 3028 |
| TURTLE          | KQYDEALS--KQ-D-----                                         | WPDG-----EPTAEKDFWELASLECYNHLTEWK            | 3027 |
| ALLIGATOR       | KQYDEALS--KQ-D-----                                         | WSDG-----EPSEAEKDFWELASLECYDHLTEWK           | 2985 |
| APLYSIA         | RAYREAMT--CE-S-----                                         | WEDG-----DPLEAEVDFWDDNRMECLNRLTQWQ           | 3055 |
| TRICHOPLAX      | KYYNQAMD--CS-S-----                                         | WPDG-----EPQAEEDLWEISRLCEYNYLQWD             | 3001 |
| SOFTCORAL       | KLYSQATN--CD-E-----                                         | WPAG-----SSPLQAEEDFWDSDILECCRRLTLWD          | 3026 |
| STONYCORAL      | KLYNEAIG--TDDV-----                                         | WIKE-----ELRQEEEDLWDSRLQCLADLTKWK            | 3054 |
| SEA ANEMONE     | KIYNEAMS--CD-D-----                                         | WSS-----KPPQEEEDLWDDARMQCFANLAKWG            | 3005 |
| SEACUCU         | KLYDQAIS--Y-D-----                                          | WEEG-----SLQQIEEDLWDEARLECCNQLTQWK           | 3026 |
| LANCELET        | ELYNQAMQ--ET-E-----                                         | WPDG-----QPLAVEEDLWDSRLQCYDHLTQWK            | 3054 |
| STARFISH        | KLYNQAFE--M-D-----                                          | WDEG-----AVSQVEEDLWDSRLNCCNQLTQWK            | 3068 |
| SEA_URCHIN      | ELYSKALS--S-D-----                                          | WGPD-----GVAREEEDFWDEARLQCCNQLTQWK           | 3050 |

Supplementary Figure 6 CLUSTAL OMEGA ALL PHYLA, EXPANDED

|                 |                                                         |      |
|-----------------|---------------------------------------------------------|------|
| PARAMECIUM      | KLDAQKDV-TQL-----TDRELNANI---P---LIR-RT--FHKYMSI--      | 2935 |
| TETRAHYMENA     | DLANELTEI-NKD-----VLEQP-EKI--G---VEK-MKILMLSLMQSDS      | 3212 |
| STYLNCHIA       | ELAKMSEK-YHS-----KQ--L-SEI--P---FKH-A---EKMIRAQI        | 3148 |
| APHANOMYCESa    | TLLDDV-----HPDRLDQH--E-PFLKHTKCFLEASIAIQD               | 2760 |
| APHANOMYCESa    | KVLEEV-----ESLDDWQON--E-PFLANHMGYFLEASMLAND             | 2694 |
| PYTHIUM         | KLQKELGS-----TEDGALWNEE--P-PYLBQGVKHLSHSTLALIE          | 2947 |
| PLASMOPARA      | ALNSEITEA-----ANADTNYLKQR--P-PYLBQGVGHYLRSLGLLE         | 2926 |
| BREMIA          | TLEAEISIA-----TKKNSEFLKQR--P-PYLBQGVGHYLRSSLSLSK        | 2907 |
| AEDES           | DLVSIIE---RQ-----V--DGNMEEFVDE--WN--LENILPKYVHSNRLNL    | 2984 |
| MIDGE           | VITEEIR---NQ-----F--NS-YNDWDEK--FPFYKTELLPHLMKSELRMIL   | 2981 |
| BOMBUS          | EIDRHLKKG-L-----DRRLDNKMNMP--W---KWMFPWFVHVVRKLI        | 2831 |
| ANT             | ALDRLVKDR-AG-----NGDLANIENPT--W---RWLLPYACDAILYA--      | 2901 |
| WHIPWORM        | RMTALVPCY-DDAG---R--T-QYDEIKKDD--HS--IDPYLPLLRSKIKLMM   | 2951 |
| TRICHINELLA     | GLETWSTTF-SASG---K--TAKLNQINETD--YL--IMHLPVPLRSKIKIAL   | 2952 |
| BEEBLE          | DLINSVDSI-VSQN---P--TETWNNLDQG--FN--QEKLLPWYISGHKLDIL   | 2811 |
| BARNACLE        | RLSRVQDR-LTAD---HDQOPRLDSVLAGND-EQ--RDHLLPWLVSXQLAI     | 2879 |
| THRIP           | QMNDVIR---EE-----V--DNELDNLWNS--WY--EKLLPRLHSEVLGLV     | 2876 |
| FLEA            | DLNIGIK---RQ-----V--DSLDEMTEQ--WA--QEKLPPLITSEIHKAI     | 2889 |
| WHITFLY         | ELKQSVL---VA-----L--DSDYDRLEEDKKLWN--LENIAWFLSSELMHFI   | 2975 |
| TICK            | ELQREVDSR-LARS---A--GNKWRDLWGG--YS--EHYLPLVYKSRVKTAL    | 2924 |
| TERMITE         | GLNNQVR---RQ-----V--ENNLQDLWDE--WL--QEKLLPQLLSEIQMML    | 2976 |
| DAPHNIA         | EIGSLNPKK-----EPWNR--FRVRNALQNFVGPAAREL                 | 2748 |
| OSTREOCOCCUS    | EIGEMLADV-RSGN-----FEADLWADCGIAGEASGSRFSTAFRVAIRQPL     | 2928 |
| STENTOR         | DIKWCLPEM-N-----GLKMKSPN-----RLAQ                       | 2636 |
| KLEBSORIDIUM    | ELVDESLEQ-VTE---YDAHGRPMADATQKLADE---NRDPYLRFLVLSAKVPT  | 3159 |
| CLUBMOSS        | EIMEDALLQ-VKN---DE---TDEYDLEKLNHPK---LQDPYLGFLVKGALVPT  | 2863 |
| MOSS            | VLMGEIYE-SME---GD---NSEPDFKRLAEP---KQBIYLYGPIRGAVKEAK   | 3015 |
| LIVERWORT       | LLEDTLTQ-VRT---DD---SAEPDLQKLWEPN---LQDPYLGFLVGAALKST   | 3054 |
| LIGNANO         | RLSGVSKKLLTPA---DGEEGSGLADRLWSRVGQ--NVCKNALSSYMLSSTRLVC | 3346 |
| COPEPOD         | AVQTAWSKQ-----FNNLDELWVNS--HKSVLQAFMSSSMHLSV            | 2890 |
| GLOBOSUM        | LLAASVLQD-V-----DDNLNSLWPE--NVPYKLPFLRSHLKLRE           | 2837 |
| PALUSTRIS       | ELAHYIMAD-L-----NNSTEHLWAD--YQDPDLRFFRAFRLRH            | 2912 |
| NEOCALLIMASTIX  | DLVDNVTDI-S-----NNNIESLWENN--KKD--LLANYIRGYIKLHQ        | 2993 |
| GLOMUS          | DLAFTVLVD-I-----EDNLSNLWDE--LQDIYLYQHFVHSFKLSL          | 3054 |
| LOBOSPOR        | YLEANMMSD-L-----DNDSQELWTEDE--YQDPYLYHYPLTYSYIKLVD      | 2997 |
| SYNCEPHALASTRUM | DIAHQVKDT-V-----EGDYFLWVDE--KKDPYLRAFVHSFTRLRK          | 2978 |
| FUNCTIVORUM     | DLYDHWIE-VQR-----PQ--ELRREG---LADPYLYYVHSSEKSK          | 2956 |
| HALBUM          | NLKANFLAY-YPGG---PQ---SVEEQDE--NTRHEMMSHPLQYSIKVK-      | 3116 |
| DPURPUREUM      | ALKENFYSY-YND-----PI--SVKKN--CILLSYLFEFNLKVK-           | 3082 |
| PVIOLACEUM      | HLRDNFNAY-YPN-----PM--TIEDYN---ORBTLFHYFLQYHLKVK-       | 3093 |
| AMPHIPOD        | VLDSDLQRLTDP-----ESGAVDTERLWQLP--RPAAA-ITAFVNSRMKLL     | 3067 |
| SHRIMP          | ELENFVKRFLQD-----DDGEVDLNRVLLP--KPTATAPALVHSLKMLNII     | 3031 |
| MUDCRAB         | ELENFVENRLKD-----EAGQVSLNQVWVLP--RPAVSVLPSVNSKMLSIL     | 3024 |
| TARDIGRADE      | QLRATATIPLQMDQN-----SQSSEDMTALWENN--GHVETMLPYALRATFNLI  | 3058 |
| HYDRA           | NLKDFTLKS-IEQI---NDSDDDFCKMKWENN--ILQIYVLPYIRSNIKLMV    | 2927 |
| SALPINGOECA     | ELENNTLTC-INPDVEYEGTDLAEVIDANNVQVP---RLLRHLPHLITVRLLEGI | 3077 |
| SPIDER          | NLESAAQSRFMD-----ESTSLLQWEDQ--YMKOYVLPYLVRSKLLKLL       | 3027 |
| LIMULUS         | ALEKAVCRFTDG-----QRPNLDRWEDS--YQEHYLPYVWRSKLLKLL        | 3081 |
| SCORPION        | LLQLSILNRLDENQ-----KQPNLNRWEP--YQEHYLPFLKSKLLKLLI       | 3046 |
| ROTIFFER        | AKCEWMMG-----NTLDQLWEDA--YSLEWVFPYAFRSKLLKLLI           | 2976 |
| CLIONA          | QVNAVCDAE-LNDYLE-----DTNCSLQVNRVP---EYERFLDTEVHSKLLLLI  | 3069 |
| OCTOPUS         | KVEKCVHG-IDPE-----NGDFTKVLDDS--FNQENYLOPLQSKLKLQ        | 2990 |
| CAPITELLA       | DVETLSTSD-LE-----GSLSAVWDS--YHQBAYLPPMLRSKIKLIL         | 3041 |
| LIMPET          | DLETVCLTA-IDNT-----ELPNLDKVEDT--LYQBHYLPYIIRSKLKL       | 3021 |
| SCALLOP         | ELDTVTSG-IE-----DGNLSSVWDDT--FYQBHYLPPIMRSKVKLVL        | 3083 |
| LINGULA         | ELGTEAMD-IEGL-----EETGLKINWEDA--YQEHYLPYIIRSKVKL        | 3048 |
| OYSTER          | ELEGVAMSG-IS-----SNSISQWVWDDT--YQEHYLPYIIRSKVKLML       | 3037 |
| SNAIL           | KLEMVTTDA-LSQE-----GEISLASVWDDT--YQEHYLPYIIRSKVKL       | 3051 |
| SPONGE          | DLEKASTCN-IGEE-----TNSKLEQLWEDS--YQEHYLPYVLSKIKLW       | 3073 |
| PRIAPULA        | ALDAHTKECLIPG-----SSEADLQLWEDT--YQEHYLPYVMSRKLKLL       | 3093 |
| DANTO           | SLEYCATVN-IDDS-----SPTRLDRWVET--FYQETYLQYVWRSKMLKQLQ    | 3064 |
| ESHARK          | ALEYCSTVN-IDDK-----TPADLENWSDT--FYQETYLPMIRSKVKLLQ      | 3072 |
| BSHARK          | SLEYCSTVN-ISDK-----TPVDLEDWSDT--FYQETYLPMIRSKVKLLQ      | 3063 |
| XENOPUS         | PLEYCSTVN-IDTG-----KPPDLNKNWSDP--FYQETYLPMIRSKVKL       | 3075 |
| STERLET         | SLQYCATVN-IDDS-----SPADLEKINWSDP--FYQETYLPMIRSKVKLLQ    | 3080 |
| GAR             | SLQYCATVN-IGDS-----SPVDLEKINWSDP--FYQETYLPMIRSKVKLQ     | 3077 |
| HUMAN           | SLEYCSTAS-IDSE-----NPPDLNKNWSDP--FYQETYLPMIRSKVKL       | 3053 |
| PLATYPUS        | SLEYCSTVN-IDSE-----SPPDLNKNWSDP--FYQETYLPMIRSKVKL       | 3061 |
| TASDEVIL        | SLEYCSTIN-VDSE-----NPPDLNKNWSDP--FYQETYLPMIRSKVKL       | 3065 |
| COELACANTH      | ALEYCSTVN-IDDK-----TPADLENWSDP--FYQETYLPMIRSKVKL        | 3071 |
| CAECILIAN       | PLEYCSTVN-IDDS-----KPADLNKNWSDP--FYQETYLPMIRSKVKL       | 3073 |
| CANARY          | SLEYCATVN-IDSG-----KPPDLNKNWSDP--FYQETYLPMIRSKVKL       | 3062 |
| OSTRICH         | SLEYCATVN-IDSG-----QPPDLNKNWSDP--FYQETYLPMIRSKVKL       | 3032 |
| GECKO           | SLEYCSTVN-IDDK-----QPPDLNKNWSDP--FYQETYLPMIRSKVKL       | 3072 |
| TURTLE          | SLEYCSTVN-IDSG-----QPPDLNKNWSDP--FYQETYLPMIRSKVKL       | 3071 |
| ALLIGATOR       | SLEYCSTIN-IDSE-----QPADLNKNWSDP--FYQETYLPMIRSKVKL       | 3029 |
| APLYSIA         | DLEKVSVRG-VDSS-----DEPNLDKVEDT--FYQEHYLPYVWRSKIKLVL     | 3099 |
| TRICHOPLAX      | KLEYLSLVN-VDNN-----DPPSFDKINWEDN--YQENYLPFLKSKAKVMC     | 3045 |
| SOFTCORAL       | KMDHNCIVN-FDEA-----NGVLDLNQINRDD--YQEHYLPFLKSKAKKFC     | 3071 |
| STONYCORAL      | ELEKCSVES-IDDK-----NPPDLNKNWSDT--FYQEHYLPFLKSKAKKFC     | 3098 |
| SEA ANEMONE     | DLEEYSKTG-VDDE-----GNPPDLNKNWSDT--YQEHYLPFLKSKAKKFC     | 3050 |
| SEACUCIE        | ELENYATMN-IDDS-----EQQDISKVDGG--YSQDLYLPMIRSKIKLQ       | 3070 |
| LANCELET        | NLYEVSTVN-IDED-----SPPDLNKNWDDT--YQEHYLPFLKSKIKL        | 3098 |
| STARFISH        | ELQNYSTVN-IDDN-----SPHDLGKINWSDT--FYQEHYLPFLKSKIKL      | 3112 |
| SEA_URCHIN      | DMEFSFTDQ-IEGK-----GSNDLSQINWDD--YQEHYLPYVWRSKIKL       | 3094 |

Supplementary Figure 6 CLUSTAL OMEGA ALL PHYLA, EXPANDED

|                 |                                                           |      |
|-----------------|-----------------------------------------------------------|------|
| PARAMECIUM      | N-----KTGEFD--LQKAKYL-----ERRTEHLADEFL--EKTLLI--I         | 2969 |
| TETRAHYMENA     | A-----DTSRWELKDYVKLWM-----NT-EYGKSVLEGPLSY--EMALIT--I     | 3251 |
| STYLONCCHIA     | R-----TDEYWNNTKQIAFWQ--KD-QVSKAYLDKNFNY--ELAINS--L        | 3187 |
| APHANOMYCEsa    | TSL-----LREFDIPLOPTRQQ-DTKLQYLVTFRPD--LIACAN--M           | 2798 |
| APHANOMYCEse    | NDR-----LKSFFGSIN--NQ-SDKQRYLNSRFPD--LIAAIY--L            | 2728 |
| PYTHIUM         | GPADPE--GEDESEMISVLRFLDDAH--KE-PKRWDLLQTNFGV--ELSS--L     | 2993 |
| PLASMOPARA      | ASP-----SNDLLESIQNFIGDAV--RD-SAKVKLIQSKFSV--ETCLAY--L     | 2967 |
| BREMIA          | ANQ-----PDSILASLRNFIGSS--RD-LRKAELVQSKFV--ETCLVH--L       | 2948 |
| AEDES           | AGD-----ERGRFIALLETWM--RV-PDRMDYKSNFG--EIAMLQ--I          | 3023 |
| MIDGE           | NND-----QVDVDFMKLLEEWI--ND-DVKCKYIKENFPE--EIMLH--I        | 3021 |
| BOMBUS          | NEDN-----TEEPQDFKIMESWL--ND-TTKIKHKRPFGE--ECSIF--F        | 2871 |
| ANT             | SEEK-----NWDNNDLLEVIQSWI--YD-RDKLQTLMPVGE--ELVIF--L       | 2941 |
| WHIPWORM        | TS-----APQEEFISFVERGE--AD-EANRQILLSRHAG--ELALLN--I        | 2989 |
| TRICHINELLA     | TSD-----SAALEELSAFVQEQ--TV-PKNREILNRRHS--LVLN--I          | 2992 |
| BEEBLE          | FT-----DSSTQHFLSLNSSL--ES-SHL-AHLETHVLE--EITMLW--I        | 2849 |
| BARNACLE        | ERD-----GTTTQQLHQLFDAGL--AE-EASRHLESRFP--ELALRH--V        | 2919 |
| THRIP           | QR-----NEDSKQFLNVINRWL--KD-DAKSTLSRSE--ELSIIC--L          | 2915 |
| FLEA            | NS-----SENSEFPFLSSWL--SD-SEKAAYLKTNFSE--ELSIIN--I         | 2927 |
| WHITEFLY        | -----RSGNSEFPKINQWI--HD-KDKERRKENELNLYVGE--ELAVWNAI       | 3017 |
| TICK            | EL-----GGEDQFLELRQWL--ED-PARKRLLEACVVE--ELVLLF--L         | 2963 |
| TERMITTE        | DKGV-----DSKREQFLQVDRWL--RD-RDKSDVLSSEHCE--ELAAIF--L      | 3017 |
| DAPHNIA         | D-----NPLPFPVQVLA--NPLPFPVQVLA--EIAMLQ--I                 | 2769 |
| OSTREOCOCCUS    | V-----DW-----SAFFANIF--AN-GESALRHRSVQV--ELSH--L           | 2961 |
| STENTOR         | F-----SOLIEVC--KLPNSLSLRPY--EMLLN--L                      | 2665 |
| KLEBSORMIDIUM   | Q-----HVALQEFLEASM--DD-PAKRARLTDQGL--ELTAMA--L            | 3194 |
| CLUBMOSS        | H-----QSLTKFLQTSL--VD-STRRDVLLQRFGT--QVAA--V              | 2898 |
| MOSS            | Y-----HGLUTEFVQSS--EI-LPKRQFLNEFST--ELALTA--A             | 3050 |
| LIVERWORT       | Y-----GSLADEFVQSSF--KE-PLKREVLKKNVGT--ELALTA--V           | 3089 |
| LIGNANO         | DKPE--SALGSDSESAEFMLRCTT--DN-DSVRTQFESHA--ELAVL--I        | 3392 |
| COPEPOD         | T-----KDSNVLGYNFLNNSL--TD-KTKSSVLSGTCAL--ELAVLF--G        | 2928 |
| GLOBOSUM        | GRTLADDTFVWSPADDNP IKKFLDEAK--KD-AKRSVLELLSD--DLTSA--V    | 2887 |
| PALUSTRIS       | GFQMDAGIHIEWKEDRPNPLDYFISKAM--ED-AAKRSVLSGSLSK--DLSLAL--V | 2962 |
| NEOCALLIMASTIX  | GYDREKNYHEWDDNKNPVQLLEDAL--KD-MNKRDLVNTNPPY--ELSVLS--M    | 3043 |
| GLOMUS          | SDD-----NSEYRQRFDFIDGAM--AN-QYKSLITTYQPI--ELALBS--V       | 3095 |
| LOBOSPOR        | GRRE--SEMLEPFWTANPNPFPQIDEAM--NN-PSHRQILPTQOP--ELALAA--V  | 3046 |
| SYNCEPHALASTRUM | GIMIDQSNRADWTDNPNPVIYVMSDAF--QS-KDKKEYLQNHAC--DVALVT--M   | 3028 |
| FUNGIVORUM      | -----NRWEQLWQFISTSF--ED-KTKRGILESEELK--EMAFVA--V          | 2992 |
| HALBUM          | -----ENWPDLQFMGSLT--P--SOHQYMESSFPG--ELAFLE--I            | 3150 |
| DPURPUREUM      | -----ENWNQLYQFIGKLE--P--HQYQYLEDKPSG--ELAFLE--V           | 3116 |
| PVIOLACEUM      | -----ENWPSLYQFISSLN--L--EQYQFLETKFPG--ELAFLE--I           | 3127 |
| AMPHIPOD        | S-----N-AESDGGLLQFVNNAM--KD-EPRKMLLEDNVSL--ELGVLS--V      | 3106 |
| SHRIMP          | D-----G-SETDNLIAPIDQSM--GD-HRRRSMLEGLDPL--ELGVLA--A       | 3070 |
| MUDCRAB         | D-----G-SETDRNLNAPIDSAL--GE-PNHRNLESTLPL--PLAIMS--A       | 3063 |
| TARIGRADE       | ENSAA--Q-EKAGDALDAFIDKAM--EI-SGRDRFLQRKGF--ELFIYQ--L      | 3101 |
| HYDRA           | EEKY-----DLVHKEFQSFIDSSL--SD-EYSKCOLQMRCE--DLALLK--I      | 2968 |
| SALPINGOBECA    | S-----AVVACCLQAFVEAAR--PH-DORWALQHFRAM--ELAMLS--V         | 3115 |
| SPIDER          | N-----GKSQPSLNFPEESR--KD-DENKTLEHNE--ELALLY--V            | 3065 |
| LIMULUS         | E-----ERQDQSLSPFFNSM--QD-PDKKEYIEETHTE--ELALLY--V         | 3119 |
| SCORPION        | E-----NRNDQSLCLPIDSAL--KE-ENKKEYIEENFSE--ELALLY--I        | 3084 |
| ROTIFER         | QEDEN-----E-QKKHKDLIRFINGLE--VEKKYLEBOSFCQ--EMALIS--L     | 3017 |
| CIONA           | QGNI-----EAGNELCEFFDDSM--QGDDARKNMVEKNVSE--ELAMMY--I      | 3110 |
| OCTOPUS         | Q-----QDINQTEFLKPIDNAL--KS-PFKSNILEHOFK--ELSLMF--L        | 3029 |
| CAPITELLA       | N-----G-DTSQDNLLSFIEESL--KT-PVHKAFIEGFS--ELALVC--I        | 3080 |
| LIMPET          | L-----G-GDQDQSLTFVDTSM--KT-TEYRAVLESRYSM--ELSLMY--L       | 3059 |
| SCALLOP         | Q-----G-DHHQDLSLTFVDEAM--KI-PEHKSILNRCG--DTALLA--V        | 3122 |
| LINGULA         | Q-----G-NEDQDMLDFVDSM--NV-EEQKIFLEARYSE--ELALLY--L        | 3087 |
| OYSTER          | Q-----G-DGDQDPLTFIDDCM--KQ-TEQKALIESRSE--ELALMY--I        | 3076 |
| SNAIL           | H-----G-DEKQDLSLTFIDDSM--KN-PQRAHLESRC--ELALMY--V         | 3090 |
| SPONGE          | T-----DSDHGLASFLDKSL--SE-EANRVSLEHQP--ELTLY--V            | 3111 |
| PRIAPULA        | V-----EGARDQTLSPVDAAT--GH-PDRRAVLETWGE--ELALLY--I         | 3132 |
| DANTO           | M-----GETNQDLSLSPVDAAM--KT-EHKKIIMETHYSO--ELSLLY--I       | 3102 |
| ESHARK          | S-----GEVDQSLTFVDRAM--KV-EQRKAVIETYSO--ELSLLY--I          | 3110 |
| BHARK           | L-----GENDQSLTFVDNAM--KV-DQRKVIETYSO--ELSLLY--I           | 3101 |
| XENOPUS         | G-----GNNQDTLTFVDEAM--KV-EQRKVIETYSO--ELSLLY--I           | 3113 |
| STERLET         | L-----GEPDQSLTFVDNAM--KV-EERKSIETYSO--ELSLLY--I           | 3118 |
| GAR             | L-----GGDQDLSLTFVDNAM--KV-EERKSVMETNSO--ELSLLY--I         | 3115 |
| HUMAN           | Q-----GEADQSLTFIDKAM--HG-ELQKALELHYSO--ELSLLY--L          | 3091 |
| PLATYPUS        | Q-----GGSDQSLTFMDEAM--KK-EQKTLIETHYSO--ELSLLY--I          | 3099 |
| TASDEVIL        | Q-----GASDQSLTFIDEAM--KK-EQKTLIEVHYSO--ELSLLY--I          | 3103 |
| COELACANTH      | L-----GGDQDLSLTFIDNAM--KV-EERKALIEHYSO--ELSLLY--I         | 3109 |
| CAECILIAN       | Q-----GKDQDLSLTFIDNAM--KV-EQRKALIEHYSO--ELSLLY--I         | 3111 |
| CANARY          | S-----GENQDTLTFIDEAM--KT-EQRKALIEHYSO--ELSLLY--I          | 3100 |
| OSTRICH         | N-----GENQDTLTFIDEAM--KT-EQRKALIEHYSO--ELSLLY--I          | 3070 |
| GECKO           | H-----GGDQDLSLTFIDEAM--KT-EQRKALIEHYSO--ELSLLY--I         | 3110 |
| TURTLE          | H-----GNDQDLSLTFIDEAM--KI-EQRKALIEHYSO--ELSLLY--I         | 3109 |
| ALLIGATOR       | H-----GGSDQSLTFIDEAM--KI-EQRKALIEHYSO--ELSLLY--I          | 3067 |
| APLYSIA         | A-----G-EGNQDPLTFMDRAL--SD-EGKKQYIQSRVCE--ELALLY--L       | 3138 |
| TRICHOPLAX      | ENDLA-----SDDFIQYLNKSL--AN-DEHLSVLENHCD--CLALIH--V        | 3085 |
| SOFTCORAL       | I-----GDRDEVFNFIKFDL--KN-EERKVLLENKYS--ELALLF--I          | 3109 |
| STONYCORAL      | Q-----GSGDMTLEFVAKAM--KT-SERAAALRSVSD--ELALMY--V          | 3136 |
| SEA_ANEMONE     | E-----GEERPCLFLRHSM--MN-EERKALIESRVD--DTALLF--I           | 3088 |
| SEACUCUR        | SSLIE-----GADTADSLQFVDSM--QQ-QDRRNILEVRHSE--DTVLF--V      | 3114 |
| LANCELET        | E-----GEMDQSLTFVDSAM--QK-PDRKALIESRCE--ELAMLY--L          | 3136 |
| STARFISH        | E-----GSEDTLQFDASAM--SD-ADKRALEARYSE--ELTLY--V            | 3150 |
| SEA_URCHIN      | E-----GSEDDSLGFLIDSSA--KD-QEKRVLIESRTE--ELALIS--I         | 3132 |



Supplementary Figure 6 CLUSTAL OMEGA ALL PHYLA, EXPANDED

|                 |                                                                                                                                                                                                                                                           |                                                                                                                                                                                |      |      |
|-----------------|-----------------------------------------------------------------------------------------------------------------------------------------------------------------------------------------------------------------------------------------------------------|--------------------------------------------------------------------------------------------------------------------------------------------------------------------------------|------|------|
| PARAMECIUM      | GVE-----                                                                                                                                                                                                                                                  | -----IDIDKKM <del>LI</del> NTAVRSP----                                                                                                                                         | SL   | 3051 |
| TETRAHYMENA     | KIE-----                                                                                                                                                                                                                                                  | -----ATYEDFN <del>SLFKM</del> QNRKP----                                                                                                                                        | SN   | 3329 |
| STYLONCCHIA     | QEGLOTK-S-                                                                                                                                                                                                                                                | -----DIVPQVI <del>KLHK</del> WMARVP----                                                                                                                                        | SY   | 3270 |
| APHANOMYCEsa    | THGG-----                                                                                                                                                                                                                                                 | -----GAMSP <del>CVEK</del> WKPIVP----                                                                                                                                          | LV   | 2871 |
| APHANOMYCEse    | N-A-----                                                                                                                                                                                                                                                  | -----SSIES <del>CLL</del> KKSITP----                                                                                                                                           | LV   | 2799 |
| PYTHIUM         | KSVV <del>TE</del> -S-                                                                                                                                                                                                                                    | -----TTAMDSRYI <del>SF</del> VEGSRALP----                                                                                                                                      | SQ   | 3078 |
| PLASMOPARA      | EDGSD--I-                                                                                                                                                                                                                                                 | -----C--K <del>NE</del> NHF <del>GF</del> VNE <del>W</del> KQKFP----                                                                                                           | FT   | 3048 |
| BREMIA          | RDT <del>FE</del> --M                                                                                                                                                                                                                                     | -----R <del>KT</del> LQ <del>DF</del> VG <del>FK</del> W <del>ER</del> FSP----                                                                                                 | SM   | 3031 |
| AEDES           | LLSRMK-----                                                                                                                                                                                                                                               | -----E--D <del>QL</del> K <del>LF</del> W <del>SS</del> SFP----                                                                                                                | TA   | 3100 |
| MIDGE           | STDVSMI-----                                                                                                                                                                                                                                              | -----E--K <del>VQ</del> L <del>HS</del> RTSKP----                                                                                                                              | IP   | 3099 |
| BOMBUS          | SAESSTD-----                                                                                                                                                                                                                                              | -----L--N <del>EL</del> K <del>P</del> W <del>NS</del> MP----                                                                                                                  | SS   | 2948 |
| ANT             | CTKKT <del>VD</del> -----                                                                                                                                                                                                                                 | -----LN <del>K</del> TV <del>S</del> KAL <del>FN</del> PS <del>M</del> KTP----                                                                                                 | TI   | 3023 |
| WHIPWORM        | ASGEA-T                                                                                                                                                                                                                                                   | -----I--PRIGAL <del>CT</del> L <del>W</del> ANS <del>G</del> -----                                                                                                             | DL   | 3067 |
| TRICHINELLA     | ASEHL-K                                                                                                                                                                                                                                                   | -----L--E <del>S</del> V <del>V</del> R <del>L</del> CR <del>F</del> W <del>L</del> RY <del>L</del> -----                                                                      | DV   | 3071 |
| BEETLE          | NNISIE <del>N</del> -----                                                                                                                                                                                                                                 | -----V--VEID <del>G</del> L <del>V</del> W <del>N</del> RAAF----                                                                                                               | EN   | 2928 |
| BARNACLE        | --TAPDP-----                                                                                                                                                                                                                                              | -----T--AAAS <del>SL</del> LD <del>H</del> W <del>E</del> RNY <del>P</del> ----                                                                                                | AA   | 2996 |
| THRIP           | EGKELQS-----                                                                                                                                                                                                                                              | -----V--E <del>ES</del> R <del>N</del> V <del>L</del> K <del>K</del> E <del>V</del> LP----                                                                                     | VP   | 2992 |
| FLEA            | KSDKIEY-----                                                                                                                                                                                                                                              | -----A--AT <del>V</del> R <del>K</del> L <del>I</del> K <del>K</del> LN <del>N</del> MA-----                                                                                   | KP   | 3007 |
| WHITEFLY        | DSFAL <del>TQ</del> -----                                                                                                                                                                                                                                 | -----M--TK <del>M</del> ER <del>L</del> L <del>K</del> W <del>N</del> K <del>H</del> SP----                                                                                    | AI   | 3096 |
| TICK            | HHT <del>R</del> GR <del>T</del> -----                                                                                                                                                                                                                    | -----E--DD <del>V</del> DR <del>L</del> L <del>S</del> K <del>R</del> L <del>R</del> V <del>P</del> ----                                                                       | SN   | 3040 |
| TERMITE         | NGEHS <del>KQ</del> -----                                                                                                                                                                                                                                 | -----E--LL <del>A</del> K <del>L</del> V <del>K</del> R <del>N</del> K <del>R</del> V <del>P</del> ----                                                                        | SA   | 3097 |
| DAPHNIA         | LI <del>FN</del> AS-----                                                                                                                                                                                                                                  | -----L--H-----                                                                                                                                                                 | PQ   | 2833 |
| OSTREOCOCCUS    | EINDIL <del>C</del> -L                                                                                                                                                                                                                                    | -----SS--TGSNI--D--RANT <del>I</del> V <del>S</del> DI <del>SI</del> IRSR <del>W</del> P----                                                                                   | SA   | 3052 |
| STENTOR         | PKDEEE-Q                                                                                                                                                                                                                                                  | -----E--HK <del>Q</del> N <del>L</del> I <del>S</del> I <del>L</del> NS <del>I</del> K <del>T</del> R <del>T</del> P----                                                       | SI   | 2748 |
| KLEBSORMIDIUM   | SSSGD <del>QA</del> AVTART <del>G</del> PL <del>P</del> SS <del>S</del> GR <del>S</del> L <del>P</del> GG <del>L</del> LN <del>P</del> DN <del>K</del> D <del>P</del> L <del>R</del> Q <del>V</del> GD <del>L</del> DT <del>Q</del> HR <del>W</del> P---- | SW                                                                                                                                                                             | 3304 |      |
| CLUBMOSS        | RPDRS-----                                                                                                                                                                                                                                                | -----N <del>I</del> S <del>R</del> L <del>L</del> S <del>K</del> W <del>R</del> Q <del>R</del> W <del>P</del> ----                                                             | ST   | 2974 |
| MOSS            | KPEAG-----                                                                                                                                                                                                                                                | -----E <del>L</del> S <del>R</del> L <del>L</del> S <del>G</del> W <del>H</del> K <del>R</del> W <del>P</del> ----                                                             | SP   | 3126 |
| LIVERWORT       | NQQSE-----                                                                                                                                                                                                                                                | -----Q <del>L</del> P <del>R</del> K <del>L</del> V <del>E</del> W <del>H</del> R <del>W</del> P----                                                                           | SS   | 3165 |
| LIGNANO         | GDRR <del>RQD</del> -----                                                                                                                                                                                                                                 | -----V <del>V</del> S <del>T</del> AD <del>L</del> L <del>A</del> K <del>W</del> R <del>Q</del> R <del>R</del> P----                                                           | DF   | 3473 |
| COPEPOD         | LS-----                                                                                                                                                                                                                                                   | -----N <del>P</del> N <del>K</del> I <del>L</del> L <del>K</del> W <del>E</del> Q <del>N</del> AP----                                                                          | VS   | 3001 |
| GLOBOSUM        | LPGLA--S-                                                                                                                                                                                                                                                 | -----TK <del>D</del> E <del>Q</del> L <del>C</del> S <del>L</del> F <del>A</del> G <del>W</del> H <del>R</del> Y <del>P</del> ----                                             | S-   | 2967 |
| PALUSTRIS       | D--H--K                                                                                                                                                                                                                                                   | -----SR <del>S</del> LR <del>F</del> EAL <del>I</del> K <del>Q</del> W <del>A</del> R <del>Y</del> P <del>S</del> ----                                                         | I-   | 3039 |
| NEOCALLIMASTIX  | NINS <del>DH</del> SK-----                                                                                                                                                                                                                                | -----Y <del>I</del> F <del>N</del> K <del>M</del> I <del>S</del> K <del>W</del> D <del>T</del> R <del>Y</del> P----                                                            | SN   | 3123 |
| GLOMUS          | SSEK <del>DQ</del> -----                                                                                                                                                                                                                                  | -----I <del>W</del> D <del>S</del> H <del>L</del> S <del>H</del> E <del>R</del> R <del>F</del> P----                                                                           | SK   | 3172 |
| LOBOSPOR        | KALR <del>DP</del> MA-----                                                                                                                                                                                                                                | -----S <del>F</del> L <del>A</del> S <del>L</del> S <del>K</del> W <del>D</del> H <del>R</del> F <del>P</del> ----                                                             | SV   | 3126 |
| SYNCEPHALASTRUM | EYQR <del>N</del> KAL-----                                                                                                                                                                                                                                | -----S <del>T</del> A <del>D</del> R <del>V</del> T <del>N</del> Y <del>I</del> K <del>M</del> Q <del>A</del> R <del>Y</del> P----                                             | DP   | 3112 |
| FUNGIVORUM      | R--EAH-L                                                                                                                                                                                                                                                  | -----E <del>N</del> T <del>A</del> L <del>N</del> T <del>L</del> M <del>D</del> G <del>L</del> Q <del>R</del> Y <del>P</del> ----                                              | SS   | 3072 |
| HALBUM          | ---NDKR-A                                                                                                                                                                                                                                                 | -----I <del>E</del> V <del>D</del> K <del>M</del> E <del>L</del> V <del>S</del> L <del>K</del> T <del>R</del> Y <del>P</del> ----                                              | SS   | 3230 |
| DPURPUREUM      | ---SNQ-N                                                                                                                                                                                                                                                  | -----I <del>S</del> N <del>N</del> Q <del>L</del> D <del>H</del> L <del>S</del> Q <del>W</del> K <del>R</del> F <del>P</del> ----                                              | SK   | 3194 |
| PVIOLACEUM      | FSINS <del>DV</del> -T                                                                                                                                                                                                                                    | -----I <del>N</del> T <del>N</del> Q <del>L</del> N <del>S</del> L <del>L</del> K <del>W</del> K <del>H</del> R <del>Y</del> P----                                             | SL   | 3210 |
| AMPHIPOD        | ENSEAG-K                                                                                                                                                                                                                                                  | -----K--AL <del>A</del> S <del>K</del> L <del>C</del> S <del>S</del> W <del>L</del> H <del>N</del> L <del>P</del> ----                                                         | RK   | 3186 |
| SHRIMP          | YAD <del>R</del> D <del>F</del> --Y                                                                                                                                                                                                                       | -----S--SK <del>V</del> K <del>O</del> V <del>T</del> S <del>W</del> K <del>K</del> Q <del>K</del> -----                                                                       | RI   | 3150 |
| MUDCRAB         | YTHNEN--Y                                                                                                                                                                                                                                                 | -----P--N <del>K</del> V <del>R</del> K <del>V</del> K <del>N</del> K <del>T</del> Q <del>E</del> -----                                                                        | CL   | 3143 |
| TARDIGRADE      | QIAH-----                                                                                                                                                                                                                                                 | -----S <del>P</del> Q <del>K</del> G <del>R</del> E <del>L</del> E <del>Q</del> W <del>H</del> F <del>L</del> A <del>N</del> S <del>E</del> R <del>E</del> A <del>Y</del> ---- | 3185 |      |
| HYDRA           | SDNY--K-D                                                                                                                                                                                                                                                 | -----TA--KV <del>Q</del> E <del>F</del> F <del>S</del> Y <del>S</del> N <del>R</del> L <del>P</del> ----                                                                       | DP   | 3047 |
| SALPINGOBECA    | QETN-LA-S                                                                                                                                                                                                                                                 | -----E <del>T</del> --S <del>V</del> N <del>L</del> L <del>S</del> S <del>S</del> K <del>R</del> T <del>P</del> ----                                                           | TP   | 3195 |
| SPIDER          | RNNS-YQ-Y                                                                                                                                                                                                                                                 | -----K <del>S</del> --A <del>L</del> K <del>L</del> K <del>Y</del> Q <del>K</del> R <del>L</del> P----                                                                         | NA   | 3144 |
| LIMULUS         | EENN-FN-S                                                                                                                                                                                                                                                 | -----E <del>R</del> --P <del>A</del> K <del>S</del> L <del>L</del> K <del>W</del> E <del>L</del> R <del>L</del> P----                                                          | SV   | 3199 |
| SCORPION        | TYRN-ID-----                                                                                                                                                                                                                                              | -----E <del>Y</del> --H <del>F</del> K <del>N</del> L <del>D</del> R <del>L</del> K <del>R</del> Y <del>P</del> ----                                                           | DI   | 3163 |
| ROTIFER         | SNQA-FT-V                                                                                                                                                                                                                                                 | -----N <del>L</del> A <del>K</del> K <del>I</del> D <del>N</del> L <del>D</del> V <del>T</del> D <del>S</del> M <del>P</del> ----                                              | NM   | 3099 |
| CIONA           | GENE-IS-S                                                                                                                                                                                                                                                 | -----Q <del>S</del> V <del>K</del> N <del>L</del> V <del>S</del> C <del>S</del> N <del>S</del> L <del>P</del> ----                                                             | NT   | 3189 |
| OCTOPUS         | NKEK- <del>IK</del> -S                                                                                                                                                                                                                                    | -----C <del>S</del> S <del>I</del> N <del>R</del> L <del>F</del> N <del>C</del> W <del>E</del> K <del>O</del> T <del>P</del> ----                                              | SL   | 3109 |
| CAPITELLA       | TTSG-ED-F                                                                                                                                                                                                                                                 | -----P <del>R</del> --Q <del>I</del> D <del>R</del> L <del>L</del> H <del>K</del> W <del>E</del> A <del>R</del> S <del>P</del> ----                                            | DR   | 3160 |
| LIMPET          | NEND-IT-H                                                                                                                                                                                                                                                 | -----T--TAN <del>Q</del> L <del>L</del> K <del>S</del> W <del>Q</del> R <del>O</del> P----                                                                                     | HK   | 3138 |
| SCALLOP         | RESN-FS-S                                                                                                                                                                                                                                                 | -----P <del>G</del> --P <del>G</del> N <del>R</del> L <del>L</del> E <del>K</del> W <del>E</del> R <del>R</del> S <del>P</del> ----                                            | DM   | 3202 |
| LINGULA         | NEDT-FQ-D                                                                                                                                                                                                                                                 | -----S <del>Q</del> --A <del>A</del> L <del>S</del> L <del>V</del> T <del>R</del> W <del>Q</del> T <del>R</del> S <del>P</del> ----                                            | DP   | 3167 |
| OYSTER          | SEGN-FT-S                                                                                                                                                                                                                                                 | -----V <del>T</del> --P <del>A</del> N <del>S</del> L <del>T</del> E <del>R</del> W <del>A</del> R <del>A</del> L-----                                                         | HP   | 3156 |
| SNAIL           | DKNN-FT-S                                                                                                                                                                                                                                                 | -----F <del>E</del> --P <del>S</del> H <del>Q</del> L <del>A</del> R <del>E</del> Q <del>R</del> Y <del>P</del> ----                                                           | HV   | 3170 |
| SPONGE          | ENDN-FS-S                                                                                                                                                                                                                                                 | -----P <del>G</del> --P <del>V</del> N <del>L</del> L <del>K</del> W <del>K</del> R <del>F</del> P----                                                                         | DP   | 3193 |
| PRIAPULA        | ATPDA <del>F</del> T-R                                                                                                                                                                                                                                    | -----N--D <del>T</del> A <del>R</del> A <del>L</del> D <del>R</del> A <del>N</del> D <del>H</del> M <del>P</del> ----                                                          | HP   | 3213 |
| DANTIO          | GD---V-S                                                                                                                                                                                                                                                  | -----V <del>N</del> --S <del>L</del> K <del>F</del> M <del>I</del> R <del>R</del> T <del>S</del> H <del>Y</del> P----                                                          | DA   | 3179 |
| ESHARK          | KEYN-FI-S                                                                                                                                                                                                                                                 | -----E <del>V</del> --P <del>L</del> R <del>K</del> L <del>L</del> R <del>T</del> W <del>G</del> R <del>Y</del> P----                                                          | DA   | 3190 |
| BSHARK          | KGSN-LT-S                                                                                                                                                                                                                                                 | -----E <del>V</del> --P <del>L</del> R <del>K</del> L <del>V</del> R <del>T</del> W <del>G</del> R <del>Y</del> P----                                                          | ES   | 3181 |
| XENOPUS         | KPGN-VS-S                                                                                                                                                                                                                                                 | -----S--S <del>L</del> R <del>K</del> L <del>F</del> Q <del>G</del> W <del>K</del> R <del>Y</del> P----                                                                        | DS   | 3192 |
| STERLET         | KD---V-S                                                                                                                                                                                                                                                  | -----Q <del>T</del> --S <del>L</del> K <del>S</del> L <del>I</del> R <del>I</del> W <del>T</del> D <del>R</del> Y <del>P</del> ----                                            | DA   | 3195 |
| GAR             | KD---V-S                                                                                                                                                                                                                                                  | -----T <del>A</del> --S <del>L</del> K <del>T</del> L <del>I</del> R <del>T</del> W <del>T</del> H <del>R</del> Y <del>P</del> ----                                            | DD   | 3192 |
| HUMAN           | KQGN-LS-S                                                                                                                                                                                                                                                 | -----Q <del>V</del> --P <del>L</del> K <del>R</del> L <del>L</del> N <del>T</del> W <del>T</del> N <del>R</del> Y <del>P</del> ----                                            | DA   | 3171 |
| PLATYPUS        | RPSN-LS-S                                                                                                                                                                                                                                                 | -----Q <del>A</del> --S <del>L</del> K <del>R</del> L <del>L</del> R <del>I</del> W <del>T</del> N <del>R</del> Y <del>P</del> ----                                            | DA   | 3179 |
| TASDEVIL        | KQGN-LS-S                                                                                                                                                                                                                                                 | -----Q <del>A</del> --P <del>L</del> K <del>R</del> L <del>L</del> R <del>I</del> W <del>T</del> N <del>R</del> Y <del>P</del> ----                                            | DA   | 3183 |
| COELACANTH      | KPDH-LM-S                                                                                                                                                                                                                                                 | -----R <del>A</del> --S <del>L</del> R <del>L</del> L <del>L</del> R <del>N</del> W <del>S</del> D <del>R</del> Y <del>P</del> ----                                            | DA   | 3189 |
| CACILLIAN       | KPSN-LT-S                                                                                                                                                                                                                                                 | -----Q <del>T</del> --S <del>L</del> K <del>R</del> L <del>L</del> R <del>I</del> W <del>S</del> S <del>R</del> Y <del>P</del> ----                                            | DS   | 3191 |
| CANARY          | KREN-LA-S                                                                                                                                                                                                                                                 | -----E <del>A</del> --S <del>L</del> K <del>R</del> L <del>L</del> R <del>I</del> W <del>T</del> S <del>R</del> Y <del>P</del> ----                                            | DA   | 3180 |
| OSTRICH         | KTSN-LA-S                                                                                                                                                                                                                                                 | -----Q <del>A</del> --S <del>L</del> K <del>R</del> L <del>L</del> R <del>I</del> W <del>T</del> S <del>R</del> Y <del>P</del> ----                                            | DA   | 3150 |
| GECKO           | RSGN-IA-S                                                                                                                                                                                                                                                 | -----Q <del>A</del> --S <del>L</del> K <del>R</del> L <del>L</del> S <del>I</del> D <del>W</del> S <del>R</del> Y <del>P</del> ----                                            | DS   | 3190 |
| TURTLE          | KPSS-LA-S                                                                                                                                                                                                                                                 | -----Q <del>V</del> --S <del>L</del> K <del>R</del> L <del>L</del> R <del>I</del> W <del>S</del> R <del>Y</del> P----                                                          | DD   | 3189 |
| ALLIGATOR       | EPSN-LA-S                                                                                                                                                                                                                                                 | -----Q <del>A</del> --S <del>L</del> K <del>R</del> L <del>L</del> R <del>I</del> W <del>S</del> R <del>Y</del> P----                                                          | DA   | 3147 |
| APLYSIA         | IDGG-GG-----                                                                                                                                                                                                                                              | -----V <del>S</del> P <del>S</del> G <del>V</del> R <del>V</del> L <del>V</del> D <del>K</del> W <del>Q</del> H <del>R</del> W <del>P</del> ----                               | HS   | 3219 |
| TRICHOPLAX      | DGRN-FE-S                                                                                                                                                                                                                                                 | -----V <del>T</del> --P <del>V</del> L <del>S</del> L <del>S</del> L <del>S</del> K <del>W</del> T <del>R</del> F <del>P</del> ----                                            | NE   | 3165 |
| SOFTCORAL       | HEDN-FS-T                                                                                                                                                                                                                                                 | -----I <del>S</del> --S <del>V</del> K <del>S</del> L <del>L</del> K <del>R</del> W <del>S</del> S <del>R</del> E <del>P</del> ----                                            | DP   | 3189 |
| STONYCORAL      | EEGN-FS-----                                                                                                                                                                                                                                              | -----S <del>P</del> M <del>P</del> V <del>L</del> S <del>L</del> L <del>N</del> K <del>W</del> S <del>R</del> L <del>P</del> ----                                              | HP   | 3216 |
| SEA_ANEMONE     | KEGK-LL-----                                                                                                                                                                                                                                              | -----K <del>K</del> T <del>L</del> E <del>D</del> L <del>F</del> S <del>R</del> W <del>S</del> V <del>R</del> F <del>P</del> ----                                              | NS   | 3167 |
| SEACUCLE        | KSDV-TQ-S                                                                                                                                                                                                                                                 | -----E <del>G</del> C <del>R</del> K <del>S</del> R <del>O</del> M <del>L</del> E <del>R</del> W <del>S</del> S <del>C</del> L <del>P</del> ----                               | DP   | 3196 |
| LANCELET        | NDRN-F-----                                                                                                                                                                                                                                               | -----E <del>T</del> P <del>W</del> P <del>V</del> T <del>R</del> L <del>L</del> E <del>K</del> W <del>S</del> S <del>R</del> Y <del>P</del> ----                               | DN   | 3216 |
| STARFISH        | KPDL-QE-A                                                                                                                                                                                                                                                 | -----I <del>G</del> C <del>Q</del> K <del>S</del> L <del>E</del> L <del>D</del> R <del>W</del> S <del>C</del> H <del>E</del> ----                                              | DS   | 3232 |
| SEA_URCHIN      | KPFS-EG-L                                                                                                                                                                                                                                                 | -----K <del>S</del> --S <del>A</del> T <del>R</del> L <del>W</del> S <del>D</del> W <del>S</del> R <del>N</del> L <del>P</del> ----                                            | DP   | 3212 |

Supplementary Figure 6 CLUSTAL OMEGA ALL PHYLA, EXPANDED

|                 |                                                             |      |
|-----------------|-------------------------------------------------------------|------|
| PARAMECIUM      | Q-D-SLYTNRRIYQNRILIMANQ-----THP-----                        | 3074 |
| TETRAHYMENA     | TYD-NQICDQILNSREIFALALYQKYNLEDFVFNK-----                    | 3364 |
| STYLONCCHIA     | AFD-TIVVDIILTARNLYIDL--YKFLRKDEFPTS-----                    | 3303 |
| APHANOMYCESe    | HQD-SLDAWSTYHLIRNVGYESLVAATDESKYG-----                      | 2903 |
| APHANOMYCESe    | QAD-TLTKTSSYLLIRNLYGVDLTAHSGGQAGK-----                      | 2831 |
| PYTHIUM         | GEH-SMALSHFYLQVQVRSFLLHSGSEGLI-----                         | 3110 |
| FLASMOPARA      | GEH-GMVLSSHFMVQNAITSLMLNRAHQDQVGL-----                      | 3080 |
| BREMIA          | SEB-GLELSSHMMQNTIVDPFLKTASDQGM-----                         | 3063 |
| AEDES           | -SD-SPTVVDLILVYRKFVLANKELETLLESADD-----RL                   | 3133 |
| MIDGE           | -SD-SLVLHDLIAYRRNPHRILEENYKFGNV-----TE                      | 3132 |
| BOMBUS          | -LD-AILPDKLSYRYTFINKLLDDKLEWNESLI-----QNSD-----DSNPDE       | 2992 |
| ANT             | -RD-NLIQNKLAAYRAYSSMLFYDSCQK-----                           | 3050 |
| WHIPWORM        | -TNYTPVVDLVCNRRNLFIEQADDLAGGK-TA-----                       | 3098 |
| TRICHINELLA     | -EHLTTTADQVILNRRKTFLEMPFGKLVDS-GI-----                      | 3102 |
| BEETLE          | -LP-SILLKEORVLYRKQFLRTLVRKIESFDND-----                      | 2959 |
| BARNACLE        | -QE-SLAFVRLVGRRHLYVDLPPGTR-----                             | 3022 |
| THRIP           | -QD-SLMSVETRLTYRFACMKYMPTEMEK-----                          | 3019 |
| FLEA            | -SD-SLLIVESKLYRMLFMSNHKKQLATL-PQ-----                       | 3037 |
| WHITEFLY        | -SD-SLTHDRLLYRCLFLAQVVKELGND-LE-----                        | 3126 |
| TICK            | -AD-SVLLSDVLSNRCLVKSLSGQ---S-----                           | 3064 |
| TERMITTE        | -FSLRLRDLAMTRKKTNRIDQMLEMT-----                             | 3125 |
| DAPHNIA         | TGD-SLIVDDELALRFTFAQRKKTERRLA-----                          | 2862 |
| OSTREOCOCCLUS   | VHD-PSEA-RVWVFRSRMMSTIVGVPIEITTT-----                       | 3084 |
| STENTOR         | ALD-DINTVFRILFARLLFYDTINQINLNVEEL-----                      | 2781 |
| KLEBSORMIDIUM   | EHD-RVGVGDVVVRRHALCLERAKGHMMLAQAGHV-----ANY                 | 3342 |
| CLUBMOSS        | ERD-DVVAVDLQNRLLVFLQKQLFNTTPEAK-----ADQ                     | 3010 |
| MOSS            | NFD-DVEADVIAQNRLLFLKYIQEHFNNPVRNS-----FDDK                  | 3164 |
| LIVERWORT       | KLD-SVEADVIVKNRLLVFFHKIQGLVNRQVSTGSVL--LGATD-----TRDK       | 3210 |
| LIGNANO         | IRD-ACDSVRLVAVRLLCANKMLLDVGLDDLA-----                       | 3505 |
| COPEPOD         | -SM-DLANEDLITRCLYNEKREKMEDEDSN-----                         | 3032 |
| GLOBOSUM        | ATD-SISVDVIVSGRKLMIKSVSAMLNNPQDQNN-----                     | 3002 |
| PALUSTRIS       | DLD-SIEVDLIMLTREVTAEKWAEVGFSPEEKS-----                      | 3072 |
| NEOCALLIMASTIX  | NEI-SIDYVFDICENRETFLAQIKKAIENDSNINMN-----                   | 3158 |
| GLOMUS          | TLD-SRPTDQIVTRQSLKEBMAERKLMFRN-----                         | 3205 |
| LOBOSPOR        | STD-TMVTNSVLDDRKLMIQRLDYTAYSRQEQ-----                       | 3159 |
| SYNCEPHALASTRUM | KRD-GDVPDDIILKSRNMPFEEELKGVIDQKDLPN-----                    | 3145 |
| FUNGIVORUM      | EVD-PLTVVDRIVTNRGIYMEKIHQSQSSTVRG-----QNE-----INEH          | 3111 |
| HALBUM          | -FD-DILVDDLVFRSFLLEKIYERFIQONNN-----DEA                     | 3264 |
| DPURPUREUM      | -QD-DIMVDLIVFYRSVLEKIYERFSTFCTDK-----S                      | 3227 |
| PVIOLACEUM      | -MD-DIEVDIVFRSFLLEKIYERFSTFANIES-----KNQ-----DQES           | 3251 |
| AMPHIPOD        | -ED-DAVFAFLASVYRGIYLFHFMKMGCRE-----                         | 3214 |
| SHRIMP          | -DD-NPLMTCGLASVYRDLVYHLMKELPEDS-----                        | 3179 |
| MUDCRAB         | -TD-SVLMQFLSHRELYFQFLKELPQDC-----                           | 3172 |
| TARDIGRADE      | AND-PVGVGSDLATTLCRCYSHVLSAQPKNR-----                        | 3214 |
| HYDRA           | KKH-SHLAHDVLSRCAPIKKFKSVYLSDRYACQL-----                     | 3082 |
| SALPINGOBECA    | YKH-PLHVDEVLFRRVIFSKLIHGCFRFGAKA--AEMLQQVDLTD---SRA---P     | 3245 |
| SPIDER          | -LD-IPVDLQVLANRQLYIQKLDKFNQVEKMEVS-LSDSLNDSSI-----HED       | 3192 |
| LIMULUS         | -AD-PLHVDDIVTNRIMPMEKIREKVVGSVPQDSA-ADSSMKT---L-----SQE     | 3245 |
| SCORPION        | -FD-SVNIDDIIMNRSLYMEKIVSKLQETNNQSTSPLESMDTIVDS-----EPN      | 3214 |
| ROTIFFER        | QTD-PPCTDQVITNRSIFFEFIEEKYLSNSVC-LTD--PETSTTFLGDSVMNDFEDLSN | 3155 |
| CIONA           | NFG-SITANDCIVYRSFFMDQLQKLLNIES-----DSMLH-----               | 3224 |
| COTOPIUS        | LED-PVKVDQVITNRLTYIDQITIERNKPE-----YSDAMDTN-----            | 3147 |
| CAPITELLA       | LLD-SVNIDDIILNRRVYMDHFAEHLTSDID-----                        | 3190 |
| LIMPET          | LLD-PVNIDDQVTSQRNVYLDHISQCLAGKN-----KESQEM-----             | 3174 |
| SCALLOP         | LLD-SVRVDQVITNRRVFLDHIGARLMAR-E-QN-SEDSMEV-----             | 3241 |
| LINGULA         | IVE-PCNIDDIVTNRCLYVDQLCHKLSSVQE-E-----F-----                | 3200 |
| OYSTER          | LLD-TEAVDHWVTRNRVFLDHSNRLSTSLV-KK-EEDAMEE-----              | 3196 |
| SNAIL           | QLD-LVDIDQVVTNRNVYMDKIRQMLSSNL-ME-E-----D-----              | 3205 |
| SPONGE          | KLD-IPVPIDDIITTRMMMLAKISITKLDQSVL-SQQ-C-----EYLLDDDG        | 3236 |
| PRIAPIULA       | TLD-PVSIDDIIVNRCLYMDHLSRHPHGNQP-----                        | 3244 |
| DANIO           | KLD-PMNVDDIITSRCPFLLDKILKRLKST-----PENSMEVDGADQG-----       | 3221 |
| ESHARK          | KMD-PMSIDQVITNRCFFLDKIQERLVSV-----Q-ADSMEDVDREGEV-ETRMEDVK  | 3241 |
| BSHARK          | KLD-PMSVDQVITNRCFFLDKIKERLSLL-----Q-ADSMEDVDDEGA-ETQMDIDK   | 3231 |
| XENOPUS         | KMD-PMNIDDIISNRCPFLLDKIQDVAVGHQP---L-VDESMEDVDLADG-NEAMEVDR | 3245 |
| STERLET         | KMD-PMNVDDIITTRCFFLDKIAGKLTNS---E-ADNSMEVDGGEDT-GVKMEVDE    | 3246 |
| GAR             | RMD-PMNVDDQVITNRCFFLDKISEKLVSS---V-AGDSMEVEEDGDK-EIKTEAGE   | 3243 |
| HUMAN           | KMD-PMNIDDIITNRCFFLSKIEEKLTP-----P-EDNSMNVQDGDG-SDRMEVQE    | 3222 |
| PLATYPIUS       | KMD-PMNIDDIITNRCFFLSKIQEKLGL-----Q-ADSMEMDGGGDT-TDRMELEK    | 3230 |
| TASDEVIL        | KMD-PMNIDDIITNRCFFLNKIQEKLNCL-----Q-LDMSMEVBDGDF-IDKVEVEK   | 3234 |
| COELACANTH      | KMD-PVNIDDIITNRCFFLDKIQEHLKIV-----P-ADSMEDVDGEGDA-SPRMVDVE  | 3240 |
| CARACILLIAN     | KMD-PMNVDDIITNRCFFLDKIREKLPHF-----Q-ADSMEDVDGGDA-SDRMELGG   | 3242 |
| CANARY          | KMD-PMNIDDIITNRCFFLDKIQEKLSPD-----Q-ANDSMEDVEYA-GDMVEVDQ    | 3231 |
| OSTRICH         | KMD-PMNIDDIITNRCFFLDKIQEKLPRD-----Q-ANDSMEDVEKDDI-GDMVEADQ  | 3201 |
| GECKO           | KMD-PMNIDDIITNRCFFLNKIQERLPTN---H-LEDSMEVDGGDA-NDNIEGGN     | 3241 |
| TURTLE          | KMD-PMNIDDIITNRCFFLDKIQEKLPTN---Q-ADSMEDVDGRGDV-GDKMETDM    | 3240 |
| ALLIGATOR       | KMD-PMNIDDIITNRCFFLDKIQEKLNV---Q-ADSMEDVEAGDI-GDEMEVDQ      | 3198 |
| APLYSIA         | LLD-PATIDQVIVNRTVYLTQMSERLRKQGE-EEN-S-----EEP-TW-----       | 3259 |
| TRICHOPLEX      | VID-PINVDQVIVNRCMYLRKILLQYRVIQTAFTS--TEDSMEIDGEDRV-IY-----  | 3215 |
| SOFTCORAL       | KLH-SVGVDEQVMTNRSVFLDKILLKFGQSSQ-LHS-SEDSMEIDGLN-----       | 3234 |
| TONYCORAL       | ILH-PIGVDDIVTNRVLFMSKFLQKFEAMGA-EER-SGI-----C-----          | 3254 |
| SEA_ANEMONE     | KLH-PISVDDQVITNRRIFGLTVCVYRDP--S-MDV-DGEWSCP---S-----       | 3207 |
| SEACURIE        | KKD-SVTVDQVITNRCFLMEKFAFRFDVADT-QGS-DSE-----V-----          | 3234 |
| LANCELET        | RMD-PISVDDIILANRCYLDKLNKFEQMAA-RGV-LD-TEV---G-----          | 3256 |
| STARFISH        | KKD-PIINIDDVSNRLLTMDKLSRIRISEG-QA-GE-----E-----             | 3249 |
| SEA_URCHIN      | KKD-PIISVDQVIVNRCYCLYMDKLCNLLGDSGG-GGG--GGDSMET---E-----    | 3254 |

Supplementary Figure 6 CLUSTAL OMEGA ALL PHYLA, EXPANDED

|                 |                                          |                         |      |
|-----------------|------------------------------------------|-------------------------|------|
| PARAMECIUM      | --VLGMW-----ALQPAKGVVQMNYPQAAANL         | SICFKIYK-----           | 3108 |
| TETRAHYMENA     | --IRSNW-----YIQNVKGLMKKGIHGAADRKM        | KKAAGYRVMN-----         | 3401 |
| STYLONCCHIA     | --LKQKHLDAI--GAILQVQCAKGSYKMGFLDSSDRF    | LKRALKIRADE-----        | 3349 |
| APHANOMYCEsa    | --GRSIAQDMASI--RVHTMLSYAEAAVASNVLALAGRL  | LADYRTLNCQAN-----       | 2950 |
| APHANOMYCEse    | --DDSIREVMAA--RVHAMLSYAEAAVESNVLALAGRL   | LTYERTLCDENS-----       | 2878 |
| PYTHIUM         | --SDTVERVFNQE--HAQLMLKYAQAAVANDLLAVASKY  | LKDYRELCNAEN-----       | 3157 |
| PLASMODIUM      | --SNETRLVVLGI--KGHALLQYANAAVSCNLSLASKV   | LKIYRELCNTHQ-----       | 3127 |
| BREMLIA         | --SDEIQLSLRNG--MSNTLLQYASAAICNIPALASRM   | LKSYRELCNTHQ-----       | 3110 |
| AEDES           | HQIDVFVQLTDA--VFETELRLDASVQSNQYFARKI     | LKRLDVAEQQS-----        | 3181 |
| MIDGE           | DSFDYLLNLQ-----RNIENVAFAQKNCDAAPFI       | LNGLKDEIRKKS-----SN-    | 3175 |
| BOMBUS          | NENSITRYRLRTI--IFDMRLKMVEASINQKNKYIAKNYL | LQVQSVSEAPS-----IF-     | 3042 |
| ANT             | --QTKRRLFQI--NYQLRLDIVDAALNQQRVYIAERHL   | LNQVQVTCVEE-----        | 3095 |
| WHIPWORM        | MAKEIYPSLAHF--SVRYRFQYAKNALHRMNYDTALRQ   | MEARKISIDDD-----LLL     | 3149 |
| TRICHIANELLA    | SVSDVRSGLPFF--RLQFGYQYKCAVRQNNHGVLLQR    | L-----QDK-----HLL       | 3145 |
| BEETLE          | DFANTLTQLNDM--SLKLDDEILEAAIGENNFMTKKY    | LNLNRRNNAFKT-----       | 3007 |
| BARNACLE        | -----QORY--LRRSRLRLVEAALQQRNATAAGRO      | LGHLSRQOWDAD-----       | 3062 |
| THRIP           | -----EVEKS--ALRMQLSLAEALQGNQNFQAKY       | LVDKMGKIQSS-----        | 3060 |
| FLEA            | DFAPINEELDNC--KIKMELSFDAAIKQKLNGLSRIY    | LTKLKDGLGHED-----       | 3085 |
| WHITFLY         | -----TGCKS--LKDSRHLHIDITLKGNSSEFAKQO     | LRLVQKHIPESV-----       | 3168 |
| TICK            | -----GAGKA--A--RLNLNAPAGAMLQRDNIPTALRC   | VLE--IEKMTREG-----      | 3103 |
| TERMITTE        | -----GASNA--LSRTFLAMVDALYQENFIYARKY      | LREAREKMSNSG-----TD     | 3168 |
| DAPHNIA         | -----S-----VKSLRLKLTALTALEQNTETARKL      | LEGAOTDLRHEM-----       | 2897 |
| OSTREOCOCCUS    | -----SIEAL--RTGMWLCASDGLRQVQVALSRKFL     | LQYIESVQRT-----         | 3124 |
| STENTOR         | -----NDY--ASSLYIGTAEALKHGWLVDSEKLL       | KDANIKRKRDKT-----       | 2820 |
| KLEBSORMIDIUM   | DGTKLAADLAAS--SSSYFKQAAAGLRKGEYVDAQDY    | LKXYDAGROS-----LGNV     | 3392 |
| CLUBMOSS        | ARQNFTRKQLEE--RAFQFLQASRGVMKQAYCVAQY     | MDYVAVAE-----KT-        | 3057 |
| MOSS            | FCNSISSLDAE--RAHLHVAVANGLMECCALPVAQSY    | LNRYMSSKF-----EFS       | 3212 |
| LIVERWORT       | KSEALASKLDQE--RAHIFHQAAVGLRKGAYNAAQSY    | MEHMAHQ-----GTV         | 3258 |
| LIGNANO         | --AGKRRFNAP--AGEQLLLLAEAACLQSQPAVALIHL   | LGRARKYCTQTS-----ATSTR  | 3555 |
| COPEPOD         | --LYEKALGRG-----YANLALSAVYQNALFAQRCL     | LKXKPLMDGVD-----        | 3073 |
| GLOBOSUM        | --VYKHFQVIVSDLLY--SRMKAATAAQGLFSAVADR    | LDTANSRPG-----G         | 3046 |
| PALUSTRIS       | -----IVNSNLQDTRRIMAKAARKHQRFYMAERY       | LTVSQVONG-----          | 3109 |
| NEOCALIMASTIX   | --DYNNKLEH--KKNIWLTCSKAALMKNFVAVATC      | LRSKNYGLS-----          | 3202 |
| GLOMUS          | -----MKV--SL--ESQQLKMSFTARKQNFVAVCTE     | LKIKRMLLI-----          | 3244 |
| LOBOSPOR        | --TLVTN--H--RIRSPMKMSAARQGNFYVANTC       | NASMQKQAS-----          | 3199 |
| SYNCEPHALASTRUM | -----PVMLAMDCE--SKSNILAEISAARQNNFL       | PLAYNTI--SFSSELEV       | 3188 |
| FUNGIWORUM      | KLSELKELLDK--RSKVYREIADAARKQNNLYSEAY     | LRNALKSXSK-----K        | 3158 |
| HALBUM          | KEDGVKNLIRE--RAELYHQMSKARKLGNIVSEAY      | FRLAVKSYPK-----T        | 3311 |
| DPURPUREUM      | SEDRVKSLLQE--RAILYHKMSKARKLGNIVSEAY      | FRLSVKSYPK-----T        | 3274 |
| PVIOLACUM       | IVNKKVSTLQE--RAELYHKMSKARKLGNIVSEAY      | FRLSVKSYPK-----T        | 3298 |
| AMPHIPOD        | -----IADKVNTE--KANSHIGVVEVALSTGNSLATQ    | LSRVDPLVKKGL-----       | 3258 |
| SHRIMP          | --LD--VSNLKDT--KNFTHRFVIRAALHNSNYHLANR   | LKXISLSEDE-----         | 3224 |
| MUDCRAB         | --LEDIQKLMKDA--KSSLHKSVIKTALMNNKHYHLANR  | LKXLRPLCGDD-----        | 3218 |
| TARIGRADE       | --LSEALMASF--RVHEKLAIVARTAIRQNNFDLSQR    | LTKLHPVACKAHQATFFSGNL   | 3269 |
| HYDRA           | --VYLNEIPFRK--VFKMVFGLTAPCLMGNFVAVAKY    | LROSHDVILKEV-----N      | 3129 |
| SALPINGOBEA     | LPARIRRLVVE--DAEQCLRMAHQSSQGLKVAEKY      | HKIVHHLNFTY-----FDD     | 3297 |
| SPIDER          | -----DFKALANT--SVHMKIRFAENCARKNFVAVST    | LKNIYRORS-----L         | 3236 |
| LIMULUS         | ELSRITLDIRQ--EFLLLKRFVDSACKQCIIVASKHL    | KWLANKAEH-----L         | 3292 |
| SCORPION        | SYPDSEKFLKQE--RLKMKLKFVEAALLQGNLQVAVKH   | LKWSQOIAKE-----L        | 3261 |
| ROTIFFER        | YSKLLKXKMTKT--TFLMKIRFAQAQSQGNFKLSLDK    | LKQSRSLIKIKN-----S      | 3204 |
| CIONA           | --EDIQWMEKT--KFQRLRNMMSARLQGNHVVARIR     | SSLSKKEHEL--L-----N     | 3269 |
| OCTOPUS         | --DGNYPKFE--KLTQLLRAESCEQNNFKLARTI       | LKXISGDCCK-----I        | 3191 |
| CAPITELLA       | -----AKIDPPKQ--RVVMSLAQVDAASLQGNHNSV     | ARKLKSADLVK-----V       | 3234 |
| LIMPET          | -----DEGDFHQS--KLRLYLMAESCKEQNNIALTLR    | LKKTNSAITS-----V        | 3218 |
| SCALLOP         | -----DMGDTFLES--KLQLHLKMAESCKQNNYKLA     | LQILGENSCKQS-----S      | 3285 |
| LINGULA         | -----EEDDKFREK--RLQFILAQAESAVEQHNF       | PVAKKXIKIIESEVKS-----L  | 3244 |
| OYSTER          | -----DEEDFLAS--KIHRLKMAESSCHKRNHKLALNI   | LADIHKNYRD-----K        | 3240 |
| SNAIL           | -----HSSIFEDI--KLRQQLKLAHSCQEQNNFM       | TLRILKETYSKCKR-----E    | 3249 |
| SPONGE          | SSCSVDSMKNE--ANIMFMAADAARTQSNYPAEYK      | LKIVKESLQDP-----P       | 3285 |
| PRIAPULA        | -----AGSDPFEQ--KFNPLFLAYQASAMQQRNP       | VALKHLRTTNQLLKK-----L   | 3288 |
| DANTO           | SGEELGLVVKTC--KFNMKLQMAESAWKQNNFP        | VASKLKLKELHRHA-----K    | 3266 |
| ESHARK          | EEDINMAIRSC--KFNMKLMAESGKQNNFVAVAMK      | LKELHKES-----K          | 3286 |
| BHARK           | EEDITMLIRSC--KFNMKLMAESARKQNNFVSATK      | LKELHKES-----N          | 3276 |
| XENOPUS         | --QEDIAVMKNC--RFTMKMKMVSARKQNNFVSAMK     | LKDLHRES-----K          | 3289 |
| STERLET         | --PEDVGSIRGC--KFSMKLMAESARKQNNFVSATK     | LKELHRES-----K          | 3290 |
| GAR             | --WEDPDLKDC--KISMRLKMAESARKQNNFVSAAK     | LKALHKEC-----K          | 3287 |
| HUMAN           | QEDISSLRSC--KFSMKMKMIDSARKQNNFSLAMK      | LKELHKES-----K          | 3267 |
| PLATYPUS        | QEDDISMIESC--KFSMKMKMIESARKQNNFVAMK      | LKDLHRES-----K          | 3275 |
| TASDEVIL        | QEDDISMIRSC--KFSMKMKMIESARKQNNFVSAMK     | LKDLHRES-----K          | 3279 |
| COELACANTH      | --EPNISAMVQSC--KFNMKLMAESARKQNNFVSATK    | LKELHRES-----K          | 3284 |
| CACILLIAN       | EEDITSMIRSC--KFNMKLMAESARKQNNFVSAMK      | LKDLHRES-----K          | 3287 |
| CANARY          | QEDDISMIRSC--KFNMKLMAESARKQNNFVSAMK      | LKDLHRES-----K          | 3276 |
| OSTRICH         | QEDDISMIRSC--KFNMKMKMIESARKQNSFSAVKL     | LKYLHREA-----K          | 3246 |
| GECKO           | EKEDIHSMIRSC--KFSMKMKMIESARKQNSFSAVKL    | LKDLHRES-----K          | 3286 |
| TURTLE          | QEDDISMIRSC--KFNMKMKMIESARKQNSFSAVKL     | LKDLHRES-----K          | 3285 |
| ALLIGATOR       | QEDNISHMIRSC--KFNMKMKMIESARKQNSFSAVKL    | LKDLHRES-----K          | 3243 |
| APLYSIA         | REAAVAERLEEM--KLWMLKMAESCRVQNNVTLSQL     | LRNIRTSCKR-----A        | 3306 |
| TRICHOPLAX      | TFPALKKRIAEE--EVSLEYLKLADTARLQSNYP       | VAIKHLRQTYLHINOEL-----D | 3264 |
| SOFTCORAL       | --TTQLEEIFLRE--RVLFSRLRSEVATQGNFVAVAK    | LQSSLHLIRDRL-----K      | 3282 |
| STONYCORAL      | --LDDIKDKFFKQ--EVELKLCMANAAKEQGNFVA      | VAHRKLEALYKIP-----Q     | 3299 |
| SEA_ANEMONE     | --VDALRERITRE--EVALQLKMQVAAREQSNFVA      | VAHRYLRESLSKI-----E     | 3251 |
| SEACUCUR        | --KVEFEYISME--KTRLSLKLAEASASEQANFP       | VALKHLSKSTYGH-----G     | 3278 |
| LANCELET        | --GEPFSHRAQRE--QFLRLRLVADSAREQANFP       | VALKHLSKSTYGH-----T     | 3300 |
| STARFISH        | --ETALEKRLRE--RLWMLKMAESARKQNNFSAVK      | LKELHRES-----S          | 3313 |
| SEA_URCHIN      | --DQKPDLLVRE--KVLMSMKMADSACQANFVAAKH     | LKSTHRGL-----V          | 3298 |

Supplementary Figure 6 CLUSTAL OMEGA ALL PHYLA, EXPANDED

|                 |                                                                |      |
|-----------------|----------------------------------------------------------------|------|
| PARAMECIUM      | ----CENWSTYSTLAKLK---LKEERFES-DQRDLT--IYQKLNDF-----            | 3146 |
| TETRAHYMENA     | --GLPEFNWYDKITSKLK---LKQLEV---DLKNDQI--P---E-----              | 3433 |
| STYLONCCHIA     | --KN-SQNMKIVAPIIKLK---CEQFKV---DTMNLNF--A---D-----             | 3380 |
| APHANOMYCEsa    | -LPKLTLMHVQ--VYSAQVSKLASRQLQAAT--NL--T-----D-----              | 2982 |
| APHANOMYCEse    | -LPKLSVHMVQ--VYSAQVSKLASRQLQAAS--GL--H-----G-----              | 2910 |
| PYTHIUM         | -LPKVSVMVD--VYVSHVQKLAERQAKSS--SMASH-----G-----                | 3191 |
| PLASMOPARA      | -LPKLNVRMI E--VYVSHVLKLDROEHKSS--DS-----D-----                 | 3157 |
| BREMIA          | -LPKLSVQMI E--VYVSHMLKLDVROGYQSS--NP-----D-----                | 3140 |
| AEDES           | ---ERGVWRI---A---HLK---LR---RLG-----ELK--SAG-----              | 3204 |
| MIDGE           | ---EMIKYKLVAGVYSMVVA---DQK---LT---SVDEKMMKLYNGMKSLVNGI IKAETIG | 3225 |
| BOMBUS          | ---FNEPLLFQCK---LK---YLMGDTET--DMKKKL-----D-----               | 3068 |
| ANT             | ---ELLWLDAR---IK---RLHADVET--NMKKKM-----D-----                 | 3119 |
| WHIPWORM        | LELENHEAYSI---COMV---OSA---SV---HSDKKV-----D-----              | 3175 |
| TRICHINELLA     | LEASNYETWAL---LQLA---NCA---NA---VKS-RT-----D-----              | 3170 |
| BEETLE          | ---QLILSKLA---YIKSLMLN--NSEQKL-----D-----                      | 3029 |
| BARNACLE        | ---DASLAAEYQLLRQTA-----VLLG-----D-----                         | 3082 |
| THRIP           | -SPTLTRWLIARSSERHQ---W---AKREQ--NSVTRL-----D-----              | 3090 |
| FLEA            | --PEKNYRWIS--RCQOI---FLQGILET--DIDKKV-----D-----               | 3114 |
| WHITEFLY        | ---NTLYTGKYLKCAQF---A---E---ENEKA-----D-----                   | 3191 |
| TICK            | -QLEGSLEWSYAETYSAL---CRAAEQV--PLDKKL-----D-----                | 3134 |
| TERMITTE        | MELQGSLSAYSKAWLQAGL-----KV---TTDEKL-----D-----                 | 3195 |
| DAPHNIA         | ---LPHYLI---QSK---VLAESS--LDSNVGASNL-----D-----                | 2924 |
| OSTREOCOCCLUS   | ---EASEMKLYEALFNLK---LATGT--S-----D-----                       | 3146 |
| STENTOR         | ---KTSVSLLS--SVIRLK---AKTVIRNS--EYGF-----D-----                | 2847 |
| KLEBSORMIDIUM   | SNQGFDDWFLR--LAAKIS---SLRAERTTRVNPLEAA-----D-----              | 3425 |
| CLUBMOSS        | ---SFPNPTVFK--RLVKPR---CLQALRTSERDPKSAA-----D-----             | 3087 |
| MOSS            | AKHRLDFRNFK--ALVRLQ---CLRAERDESAN--NRI-----D-----              | 3243 |
| LIVERWORT       | KNGALDFKFFK--GLVKLR---CLQADRVKLIEASEAT-----D-----              | 3291 |
| LIGNANO         | GSSPTSVAWRA--ACAKAW---TTAALSLD--TDRNF-----D-----               | 3585 |
| COPEPOD         | ---ELAQ--MR--SXIISK--VAILN--FTRSDLTAV-----D-----               | 3100 |
| GLOBOSUM        | ---EFVP--EF--MQQYK--QTLKSD---RELGFA-----D-----                 | 3071 |
| PALUSTRIS       | ---FDD--IF--NYNALK--LSFVRM-----KQLQGO-----D-----               | 3132 |
| NEOCALIMASTIX   | ---KM---EF--SYEAIK--YIVTELKTLK--DSNERL-----D-----              | 3228 |
| GLOMUS          | ---DD--E--RL--SYCFK--LNLREQ--NTI-----D-----                    | 3265 |
| LOBOSPOR        | ---SY---NI--HYSQIK--LDLARAT--LEM-----D-----                    | 3219 |
| SYNCEPHALASTRUM | ---KAEK--QL--VYLQLH--LQWVLSA---EDSSRA-----D-----               | 3213 |
| FUNGIVORUM      | KE--PFDPCR--SLVKLH---NKKALDSK--SLIETA-----D-----               | 3187 |
| HALBUM          | RENDLAFPLVS--SLIKIY---CLKAKNST--TQVETL-----D-----              | 3342 |
| DPURPUREUM      | KENDLAFPLVS--SLLDIY---CIKARTSA--SPIETL-----D-----              | 3305 |
| PVIOLACEUM      | KDNDLAFPLVS--SLLNIY---CMKAKNSP--SPMETL-----D-----              | 3329 |
| AMPHIPOD        | LTESLTVKYHF--LCANTS---I IIGONKR--GSERI-----D-----              | 3288 |
| SHRIMP          | ---YSKAQYF--LMAETH---ILRGQG--K---QTDRL-----D-----              | 3250 |
| MUDCRAB         | ---ELAKYF--LMTETN---IQGRS--R---PONRL-----D-----                | 3244 |
| TARDIGRADE      | PLRRLEDRWGG--TFAAAA---IAKSRNKTP--QQAQSNF-----D-----            | 3303 |
| HYDRA           | NVSAYGLHWRI--LYAKVY---CKTAKFQND--IGANP-----D-----              | 3161 |
| SALPINGOBEA     | TRLDLMLQQAH--GLVAIH---LHEFH---LGVREKHYF-----D-----             | 3329 |
| SPIDER          | D-GSTWKFIE--AYCSVNI---NORVLSQH--SEKSL-----D-----               | 3265 |
| LIMULUS         | GNSDHRTTWTH--KYCEIY---HQAVMLR--GAEKL-----D-----                | 3322 |
| SCORPION        | KADHWINCIIH--LYCKID---LKKAKNON--YPEQL-----D-----               | 3291 |
| ROTIFER         | DFLDLQLIWNH--CYLNTH---LNKCKQAN--SKESE-----D-----               | 3234 |
| CIONA           | SDKNLSEFKLTH--EAALSY--LAQAESLALNKNPNNKI-----D-----             | 3304 |
| OCTOPUS         | SLMKLKLKWNH--LYVQSC---QKNTLL---SNDTC-----D-----                | 3219 |
| CAPITELLA       | DSEELSVLFTH--SHANAN---KRCAS--GSEPSERL-----D-----               | 3265 |
| LIMPET          | DNEELKVEWSQ--LYASTH---QKKIIS--NDWSEDCI-----D-----              | 3249 |
| SCALLOP         | GSVGLWVKWGH--LYTSTH---HKRAQSVQSSWTDTF-----D-----               | 3318 |
| LINGULA         | SESPVLIQFYH--CYAKLH---NKITEV--TMDASATL-----D-----              | 3275 |
| OYSTER          | ENEILNLEWSH--LYAKTH---QLSAMSADTWTNDIF-----D-----               | 3273 |
| SNAIL           | KSELLVVEWSH--LYATTH---QKKALSCGIWSKMDL-----D-----               | 3282 |
| SPONGE          | DNFYQLRWLH--SLIKVR---LDRHODP--SPTDM-----D-----                 | 3315 |
| PRIAPULA        | DSDSLAVQWTH--SYVRTW---QIATGHQ--RDSADR-----D-----               | 3320 |
| DANTIO          | IDDARLLRWVH--SFSRFT---HKRIARLG--PSEKI-----D-----               | 3296 |
| ESHARK          | ARDWAVKWH--TYSRSL---HRSRQA--RPEQV-----D-----                   | 3316 |
| BHARK           | IRIDWRVRIQ--SYSRFS---HKRSRSMK--RAEQI-----D-----                | 3306 |
| XENOPUS         | TNEDWVKWH--SYSRYS---HSRSDLT--CSEQI-----D-----                  | 3319 |
| STERLET         | NQEDWVVRVH--SFSRFS---HTRSHQOS--SSEQI-----D-----                | 3320 |
| GAR             | ARSHWNLRWAH--GFCRFK---HLYSQAQD--SAEQI-----D-----               | 3317 |
| HUMAN           | TRDDWLVSWVQ--SYCRSL---HCRSRQSG--CSEQV-----D-----               | 3297 |
| PLATYPUS        | TKDDWLVWRNH--NYCRCS---HSQSOSQS--SPEKI-----D-----               | 3305 |
| TASDEVIL        | TREDWLVWRNH--SYCRFS---HSRCIQOS--SSEQI-----D-----               | 3309 |
| COELACANTH      | SREELTRVWH--SYSRFG---HSRSQSQS--CPERI-----D-----                | 3314 |
| CAECILIAN       | TRODSVVRWH--SYCRHT---HSRSQSQT--SPEQV-----D-----                | 3317 |
| CANARY          | WREDWLVWRNH--NYCRFT---HSRNLIS--CPERV-----D-----                | 3306 |
| OSTRICH         | TREDWLVWRNH--NYCRFT---HSRNLIS--CPEQV-----D-----                | 3276 |
| GECKO           | TREDWLVWRNH--SYCRFS---HSRNLIS--NPEQI-----D-----                | 3316 |
| TURTLE          | TREDWLVWRNH--SYCRFS---HSRSOSON--SPEOM-----D-----               | 3315 |
| ALLIGATOR       | TRDSWLVWRNH--SYCHVS---HSSCQOS--SPQOI-----D-----                | 3273 |
| APLYSIA         | SNKQPLEVWH--LYAKTH---HTKAGNTPPWADDTF-----D-----                | 3339 |
| TRICHOPLAX      | KDELLTVKWH--IYTKVH---CDKSLTLP--PDERL-----D-----                | 3294 |
| SOFTCORAL       | NDESEVLVWTH--SYGDLN---CKKCPNLL--PSEAV-----D-----               | 3312 |
| STONYCORAL      | GNEENLVVWSH--TYAEVH---FRKIQTLT--AVGAV-----D-----               | 3329 |
| SEA_ANEMONE     | ---DNLHVKWH--AYAVTQ---QKKAHGLM--AIDAV-----D-----               | 3279 |
| SEACURE         | DHEDLKLWTH--TYVRMH---QRKASLLT--AAEKV-----D-----                | 3308 |
| LANCELET        | EDDPLRLRWTH--CYARLH---QRKASLLT--GAQKL-----D-----               | 3330 |
| STARFISH        | AHEDLKPWTH--SYVQMH---QKILLTIE--LKEQV-----D-----                | 3343 |
| SEA_URCHIN      | EFEDLRPAWTH--SYVSMT---QRKALLK--PYERI-----D-----                | 3328 |

Supplementary Figure 6 CLUSTAL OMEGA ALL PHYLA, EXPANDED

|                 |                                                         |      |
|-----------------|---------------------------------------------------------|------|
| PARAMECIUM      | -----DRY-----DQHKKLLK-----FFSQQAQ-----KNTE---KPVQFR     | 3174 |
| TETRAHYMENA     | -----NPF-----EKFSKLIK-----IFEQEKE-----KYIHQ-LDQSQIVK    | 3464 |
| STYLONCHEIA     | -----KG-----DKLQKIVK-----VFDKMQ-----ESFGE-DQ-----       | 3404 |
| APHANOMYCEsa    | -----DHQRVLA-----QVANYYA-----ALTRLFDN                   | 3005 |
| APHANOMYCEse    | -----NDRARVIS-----QVTNYA-----ALTRLFEN                   | 2933 |
| PYTHIUM         | -----GLTSDAIN-----TITRYYO-----TSTKMPDN                  | 3214 |
| PLASMOPARA      | -----TSLK-----LITKYFE-----TATKLFNN                      | 3176 |
| BREMIA          | -----SSNP-----LITRYFN-----TATKTFDN                      | 3159 |
| AEDES           | EPAVS-----Y-----QKLDRIWQ-----RLKAVVE-----EAGSENYKA---VK | 3236 |
| MIDGE           | EVEVPOIKIEAYSCASEISLRLWR-----IYKKCSE-----DETIEI-----    | 3262 |
| BOMBUS          | -----SHYSSSWK-----HCHDLLR-----QNSIVDTTN---VS            | 3094 |
| ANT             | -----ISYDTSWE-----TLHKLLK-----SNKLDTISS---TA            | 3145 |
| WHIPWORM        | -----QVFRRAVE-----LFENCKI-----SH-----ET                 | 3194 |
| TRICHIANELLA    | -----AYLMQALN-----LFDLKRI-----SD-----PE                 | 3189 |
| BEEBLE          | -----NVILQGIK-----TLVPIFE-----ET-----ES                 | 3048 |
| BARNACLE        | -----RDPVRTWR-----VLDDQVR-----WRD-SAPP-----LP           | 3106 |
| THRIP           | -----DNLLKVR-----QLDVLVA-----SDDLDDHPD---LS             | 3116 |
| FLEA            | -----QDCHRSWD-----MLESKE-----IDNLKYYPN---L              | 3139 |
| WHITEFLY        | -----KKINQSWN-----ALDSMRK-----MAIEDDLQC---MR            | 3217 |
| TICK            | -----ASHLRTLQ-----KLEATRA-----EGLDDAAST---VR            | 3160 |
| TERMITTE        | -----KLGDSWS-----VIEDORS-----A-----FQ                   | 3212 |
| DAPHNIA         | -----DRLLAKRVA-----TINRAVF---A---STGVP---KDRWBED        | 2953 |
| OSTREOCOCCUS    | -----NSTEKALEMC-R---NQLHEEK-----WQ-----DDHIN            | 3172 |
| STENTOR         | -----DLAIQHFORL-YE---SIKQYKS-----NNEDKDA                | 2873 |
| KLEBSORMIDIUM   | -----GOLSQVMR-----ELSDKAA-----G-AA---GVLGVSAA           | 3451 |
| CLUBMOSS        | -----AMLEQVLD-----YVRQAS-----KPSIS---GCDDWRRV           | 3115 |
| MOSS            | -----KKLQQLLV-----YIETERR-----K-LS---KHPEFLPE           | 3269 |
| LIVERWORT       | -----EMLQQVLN-----YVKSTAQ-----KPWVE---SSHDWQMG          | 3319 |
| LIGNANO         | -----DAMSVAE-----KVAKV-----RR                           | 3599 |
| COPEPOD         | -----DNFCLLPK-----SMNS-----SOLS---EENRNLA               | 3124 |
| GLOBOSUM        | -----NRFKPLENLL-----KHMDYKK-----SIRE---TPNTVOLK         | 3101 |
| PALUSTRIS       | -----EMFEIAGKAM-----QNFAYYKT-----GIEK---LEALQRAK        | 3162 |
| NEOCALIMASTIX   | -----KKIVSLGISL-S---SLYKKLEK-----D---PNDQLLAK           | 3256 |
| GLOMUS          | -----DTEKABILLALS-----EFKVKYS-----SDSR---DD---FK        | 3294 |
| LOBOSPOR        | -----DRVVKAGIL---ADSLKFEYIS-----NDRD---FDSTQIAG         | 3252 |
| SYNCEPHALASTRUM | -----SOLLGRGIGLYEQEELRPLLA-----SSD---YA---RE            | 3243 |
| FUNGIIVORUM     | -----DKLTKALK-----FVQNKEE-----EBIL---NNKSYQSM           | 3215 |
| HALBUM          | -----DRFIKALK-----FVESKSD-----EDSIK---NNPDNLQR          | 3370 |
| DPURPUREUM      | -----DRFVKALK-----FIESKKN-----EESIV---SINENLQK          | 3333 |
| PVIOLACEUM      | -----DRFVKALK-----FIDSKKD-----DETTA---SSQNLOK           | 3357 |
| AMPHIPOD        | -----KSLVEAWC-----RQLGEVEK-----LQERF---TSPFVNME         | 3317 |
| SHRIMP          | -----KYLVEAWA-----KYLGRVSS-----MSILD---QNPVVEIQ         | 3279 |
| MUDCRAB         | -----QYLVEAWV-----KFLGKVTSS---MPVLE---QDATIETE          | 3273 |
| TARDIGRADE      | -----AGLMQSLG-----LIDKHLG-----KSTAA---NAVPLRSLE         | 3332 |
| HYDRA           | -----TALVSVIG-----HLEKQSFDKTIATMLLE---FDGWR             | 3192 |
| SALPINGOBECA    | -----RANARDLD-----RLANKCSADLPSSKSG-----AHSLYKA          | 3359 |
| SPIDER          | -----DIWVGSYK-----QLCELEKRCGSGVS-----                   | 3287 |
| LIMULUS         | -----KILLRAKE-----QLMKLDDTVARSNI-----SEAKTH             | 3350 |
| SCORPION        | -----DTLLCAHK-----QLAKLDLHFPKKLD-----VSTMN              | 3318 |
| ROTIFER         | -----ESFFESMVLRL-----EILKYDSI-----SDTFKNNQKNLYQE        | 3267 |
| CIONA           | -----KYFIDSVE-----CLNEQNE-----FITE---SATNIERI           | 3331 |
| OCTOPUS         | -----INLVNNLK-----ILCEHDL-----SLLPP---EEQSLRWK          | 3247 |
| CAPITELLA       | -----V---EVKK-----RLDKCSE-----SSTLK---LNAALLCD          | 3290 |
| LIMPET          | -----NGLLT-----TIGKFND-----SDVLK---SKPDLYRR             | 3274 |
| SCALLOP         | -----TSITSTVD-----LLGKNST-----SDTLE---ETPAPGRH          | 3346 |
| LINGULA         | -----SPVLGALG-----LLERKRD-----HKLVK---ESNVLTRR          | 3303 |
| OYSTER          | -----SSVITTTID-----RLGKFKD-----SSLFE---REAGLGRR         | 3301 |
| SNAIL           | -----INVLSTLD-----PLSKVAE-----SKMLR---EKPALGMR          | 3310 |
| SPONGE          | -----EAVISLTC-----QMDNFKRLLGSSKGAIS---SK---PTISQ        | 3348 |
| PRIAPULA        | -----HRLLDITIK-----ELDKHAG-----KAVLH---QORGLARE         | 3348 |
| DANTO           | -----NALLKTVP-----LL-KDAE-----RQSEA---LSARMLRD          | 3323 |
| ESHARK          | -----VTVLKSIP-----LL-VEIN-----VDYLN---THTRILLRD         | 3343 |
| BHARK           | -----VTVMKTIP-----LL-GEID-----VGNLN---IQRHAFRD          | 3333 |
| XENOPUS         | -----LTALKTIP-----LL-EESK-----TEYLT---KNTKACRY          | 3346 |
| STERLET         | -----LTVLKTIP-----LL-EERK-----IDYTK---ATTRIVRD          | 3347 |
| GAR             | -----LNVLKTVD-----VL-EDSK-----TDPEK---ETAQNFRN          | 3344 |
| <b>HUMAN</b>    | -----LTVLKTVS-----LLDENNV-----SSYLS---KNILAFRD          | 3325 |
| PLATYPUS        | -----LTVLKTVS-----LL-DDNL-----SSYLS---KNIVASRN          | 3332 |
| TASDEVIL        | -----LTVLKTVS-----LLADENL-----SSYQS---RNSLAFRN          | 3337 |
| COELACANTH      | -----QVMKTIS-----LL-EESK-----ADYLN---KNTRALRD           | 3341 |
| CACILLIAN       | -----LSVIKTIS-----LL-EETK-----ADYLR---ENTRAFRN          | 3344 |
| CANARY          | -----LSVLKTIS-----LL-EDTK-----SDYLS---KNIMAFRN          | 3333 |
| OSTRICH         | -----CSVLKTIS-----LL-EDTK-----SDYLS---KKVTAFRN          | 3303 |
| GECKO           | -----LTVLKTVS-----LL-DEAS-----SGTSL---KDRLAFRN          | 3343 |
| TURTLE          | -----LTVLKTIS-----LL-DESK-----SDYLS---KNIVAFRN          | 3342 |
| ALLIGATOR       | -----LTVLKTVS-----LL-DENV-----PDHLS---KNIEILRN          | 3300 |
| APLYSIA         | -----GNVLSTLD-----ELDKMKG-----SPALY---ERPDMGLR          | 3367 |
| TRICHOPLAX      | -----KTLTANS-----QFEKVKD-----LSVIL---ENTTLMRE           | 3322 |
| SOFTCORAL       | -----DTAISALD-----QLDKIKD-----SKVLQ---ENASTGIR          | 3340 |
| STONYCORAL      | -----ETALLVAG-----QLDKFSA-----SKILE---IEPLRGIQ          | 3357 |
| SEA_ANEMONE     | -----QTALSTVS-----KLGKPSI-----NTLA---NDPVIALR           | 3306 |
| SEAACUKE        | -----TTLTTFD-----PMSKLEN-----TESFK---TMRNPFQS           | 3336 |
| LANCELET        | -----NNVLTTFE-----QLDKFSS-----CRVFE---EDLAVAKQ          | 3358 |
| STARFISH        | -----MILLTFD-----PLAKLSN-----TPALT---GDVCLTRH           | 3371 |
| SEA_URCHIN      | -----TSLLKALD-----HLGKLPV-----SHNLG---SDLFILLCD         | 3356 |

Supplementary Figure 6 CLUSTAL OMEGA ALL PHYLA, EXPANDED

|                 |                                                            |      |
|-----------------|------------------------------------------------------------|------|
| PARAMECIUM      | FNMLP-IISNQHYLKI---NQDLVFM-----FNQ--ESRK--HNNR-YDFNP---    | 3212 |
| TETRAHYMENA     | FQLN-IQVNEKFIDV---YQDYTLTQ--IVEDIFL-EKYA-DV--INNIYWGYNKLFQ | 3513 |
| STYLONCNCHIA    | -----QF-----QEDLRTE--I-KCILLKQKLEKMK--LNIIFQGVS---         | 3436 |
| APHANOMYCESA    | DEVLV---FIPPTLP--ATTQAD-----IYGW-QA-----                   | 3028 |
| APHANOMYCESE    | DEVLE---LISTMP--PDAQAE-----ICGW-QA-----                    | 2956 |
| PYTHIUM         | TDILE---LMESLP--LHDRV-----MGSL-EA-----                     | 3237 |
| PLASMOPARA      | VEIMH---MMKIAT--ARDQVA-----VGYL-EA-----                    | 3199 |
| BREMLIA         | AEIMO---MMETAA--VSDKVA-----MGYL-EA-----                    | 3182 |
| AEDES           | VAGLH-----E-----LF-Q-----                                  | 3245 |
| MIDGE           | -----                                                      | 3262 |
| BOMBUS          | -----SRKQISMIASKIK-FSEE-----NETP-AELLR-----E-----          | 3122 |
| ANT             | -----IREHICTMASKIES-LSRE-----NIVP-AKYLA-----C-----         | 3173 |
| WHIPWORM        | FSRYG-HLTLDHITLKA-VLYNSV-A-----DCFL-N-----STKVGNHFLKE      | 3233 |
| TRICHINELLA     | VNVTE-GSSADQFALIG-MLFDNV-A-----ETVV-A-----SSENT-----       | 3222 |
| BEEBLE          | FLQLS-AHVT-FFKHLD-YISSLLSQN---EDLL-QNRQS---D---LM---       | 3084 |
| BARNACLE        | VGLLL-RRR---RLEAEALAE-----RCLL-EPAAV---A---DPFVS---        | 3137 |
| THRIP           | V--IA-HSV---ESNLALTIRETLSAE---PHSL-NTLIK---NQSDGHNWLC-     | 3156 |
| FLEA            | YIDVH-HSIVDVTKLFFKHLIFE--N---ANIL-ENYPS---L---ENF---       | 3174 |
| WHITEFLY        | FSLMA-DVIVSSFRIRIMP-KISAD--N---RNSF-EKKVR---S-----         | 3249 |
| TICK            | YCLLK-AQAV-----AGLAKLDA-----GAVL-NKQOM---A---ELQ-L-        | 3192 |
| TERMITTE        | YPMLEH-AETLQHVSVMAAGILQLEQQ---PGVL-TKLPA---A---EVKKL-      | 3253 |
| DAPHNIA         | LERFE-ASLCAQ--V---FQLVDNIQ---PK---ELT-----                 | 2978 |
| OSTREOCOCCUS    | CSLLE-ARMCEH--L---A-----                                   | 3185 |
| STENTOR         | INVLF-GQIYSN--E---T-----                                   | 2886 |
| KLEBSORMIDIUM   | VRLLQ-ADLAAQ--L---ARV-----CV-QHHG-----                     | 3472 |
| CLUBMOSS        | TMLVE-SDTSAQ--L---GRT-----KL-DLLI-----                     | 3136 |
| MOSS            | FQMEQ-ADVNR--V---AWA-----TL-SSQS-----                      | 3290 |
| LIVERWORT       | LRLLQ-ATVSSQ--L---AMM-----NL-DQAS-----                     | 3340 |
| LIGNANO         | QLISP-SPTWEE--L---LAAGLCDRA--S-----                        | 3621 |
| COPEPOD         | WNIHQ-RDINEC--L---FTIVDKNS-QL-TPSIL-RRQMK-----TD-          | 3158 |
| GLOBOSUM        | FITLE-TRTLRSR--L---LSLTHCL--S-AN-DSFFSDL-----GSN-          | 3133 |
| PALUSTRIS       | FLSLE-GRLYDT--I---VQAVLDE-----KDLA-ELFLSNK-----HLK-        | 3195 |
| NEOCALIMASTIX   | LYQLD-SNLSSI-----ILDDK-----KSMH-QSLLSEC-----QNN-           | 3286 |
| GLOMUS          | HRILE-SEFYGL--L---VSELDR-----VNR-NLL-----KI---             | 3322 |
| LOBOSPOR        | LNMLG-SKAYSIL--L---RELITDD---RTIWH-SHL---K---              | 3279 |
| SYNCEPHALASTRUM | YFLTG-SKILLET--A---RLYLQSD---PKML-EQM-----RVS-             | 3272 |
| FUNGIVORUM      | PTTLQ-ANVLAE--V---SRLSLT-E---E-----NVVR-----               | 3239 |
| HALBUM          | YKRLH-GNIQWE--I---YQLDKLG--S-----NLVM-----                 | 3395 |
| DPURPUREUM      | YLMMH-GDIFWD--I---YQLDKLG--S-----KFN-----                  | 3358 |
| PVIOLACEUM      | YLMMN-GDILWE--L---YQLDRKLG--S-----ELVS-----                | 3382 |
| AMPHIPOD        | YLCVE-SKLCVE--L---CNAIQSLG--GNF-DAQN-----                  | 3344 |
| SHRIMP          | YLKLE-SHLGLE--I---CRAIQDMG--DDW-TEDN-----                  | 3306 |
| MUDCRAB         | YLKLE-SSLCVE--I---SEAMKDMG--NSW-QEDD-----                  | 3300 |
| TARDIGRADE      | ADILL-----A--V---ADTLHDFG--SS-VSLET-----                   | 3354 |
| HYDRA           | CLL-----L--C---NSRLQND---EF---KLI-----TCET---              | 3213 |
| SALPINGOBECA    | EVLLSLGKIVPL--C---PAT-DEN---KVLW-DHIIAEVDAPATRAGEKCIV-     | 3403 |
| SPIDER          | QKLL-SEITEL--I---ARMPMKO---K-SLF-DTITV-----                | 3315 |
| LIMULUS         | HSYLH-SFNAEM--I---AESLIED---DVSVV-SELDY-----               | 3379 |
| SCORPION        | HYLLQ-SEIEM--A---ADIVKYN---DVH-----A-----                  | 3341 |
| ROTIFER         | QRVLH-SKFSKF--L---IESLMDHMNQTDFDGL-QGIIITEK-----           | 3303 |
| CIONA           | HLLALATTHHL--T---SSNLNG-----E-D-----                       | 3353 |
| OCTOPUS         | HNVLY-GEHLSS--L---ASVLKNEG--D-EFQF-ENLPL-----              | 3277 |
| CAPITELLA       | QHLLQ-GEHLVT--M---ATILQNG---VKDI-DALDQ-----                | 3318 |
| LIMPET          | HHVLT-ATSYEL--L---AESCL-A---AELP-QSLSS-----                | 3301 |
| SCALLOP         | HFVLL-GQTHEL--L---VDGIR-S---VSLG-GCLGD-----                | 3373 |
| LINGULA         | HLVLQ-GNIFDS--V---TSSLL-S---LPDF-SSVSP-----                | 3330 |
| OYSTER          | HFVLL-GQAFGL--L---VKGVO-S---ENCF-SSLSL-----                | 3328 |
| SNAIL           | HMILLE-SRTFPA--V---VNGLM-S---VGNL-EELGD-----               | 3337 |
| SPONGE          | HHVLL-SKLLNK--M---AEIFATPE--DMLAL-SALSIV-D-----            | 3380 |
| PRIAPULA        | NLLK-GRSIEA--V---AREVLTR---PACL-HTLPA-----                 | 3376 |
| DANTIO          | QRILL-GTTPYDL--M---AGAADRS---PPAL-ETLGE-----               | 3351 |
| ESHARK          | QNTLL-GSSYCI--L---ADALNKE---PTCL-QRIKE-----                | 3371 |
| BSHARK          | QNTLL-GTTYI--M---ANALNKD---PSCL-QYIEE-----                 | 3361 |
| XENOPUS         | QNMLL-GDYRI--M---ADAVCKE---PDCL-YKIED-----                 | 3374 |
| STERLET         | QNILL-GTTYHI--M---ANALTRD---GLAL-EHIGE-----                | 3375 |
| GAR             | QKLLL-GTTYHI--M---ASAVSRD---PSVL-EKIGP-----                | 3372 |
| HUMAN           | QNILL-GTTYRI--I---ANALSSE---PACL-AEIEE-----                | 3353 |
| PLATYPUS        | QKLLL-GTTYRI--M---ANALSKE---PACL-EQIER-----                | 3360 |
| TASDEVIL        | QNILL-GITYNI--I---ANALSNE---PTCL-AQIEE-----                | 3365 |
| COELACANTH      | QNILL-GTYMI--I---ANALNKT---PTSL-QDIGE-----                 | 3369 |
| CAECILIAN       | QNILL-GTYSI--I---ANALCKD---PRCL-QRIDK-----                 | 3372 |
| CANARY          | QNILL-GTYIQL--M---ANALSOD---PRCL-EQIEK-----                | 3361 |
| OSTRICH         | QNILL-GTYRI--M---ADALSHD---PRCL-EQIEE-----                 | 3331 |
| GECKO           | QNILL-GTTPHI--M---ANALSKD---PRCL-EQIVE-----                | 3371 |
| TURTLE          | QNILL-GTYHI--L---ASALSKD---PGCL-EKIEE-----                 | 3370 |
| ALLIGATOR       | QNILL-GTTYRI--M---AVALSKD---PRCL-VELEE-----                | 3328 |
| APLYSIA         | HSTLG-GRGVDL--L---LGGLLALQ--ST---EGLSE-N-----              | 3395 |
| TRICHOPLAX      | HLLLR-SRLLDM--T---SKILAES---DASIL-DL-N-E-----              | 3351 |
| SOFTCORAL       | HLLLR-SRNLDA--I---TNVLSIPG---TW-DSLEK-E-----               | 3368 |
| STONYCORAL      | HHILR-SKTFDI--L---CKAMLDG---GVVI-ATLES-Q-----              | 3386 |
| SEA_ANEMONE     | HHILR-SRCFDI--L---TDAIAGA---GRSTL-ATYKL-I-----             | 3336 |
| SEACUCUR        | HQILS-STSFEM--V---ADALNSDT---EANML-GKLR-E-T-----           | 3367 |
| LANCELET        | HHTLT-SLSYEI--V---AHALIQE---GGAIL-TGLKD-T-----             | 3388 |
| STARFISH        | HHTLT-SKSYDL--V---AIALQKG---GAIL-TGLRN-V-----              | 3401 |
| SEA_URCHIN      | HRILT-SKTYQS--M---ASALQEE---KGEML-TRLSD-A-----             | 3386 |

Supplementary Figure 6 CLUSTAL OMEGA ALL PHYLA, EXPANDED

|                 |                                                             |      |
|-----------------|-------------------------------------------------------------|------|
| PARAMECIUM      | -----FYQRY-----ADAIMQT-----FNGYLELQ-----                    | 3232 |
| TETRAHYMENA     | NDIMKKDIDLSSQS-----QS-LSQPFE-----NTFSFKGPASLQO---MA---GNN-  | 3553 |
| STYLYONCHIA     | ---AEKEIKHLQRY-----QKDCQTYLD-----RS--FKT--LDQ--VI---K-      | 3467 |
| APHANOMYCEsa    | -RALTEAAAFHRE-Y---GDASLGTLE-----RGAMEI---FOY--Q-----        | 3061 |
| APHANOMYCEse    | -RGLMESSDFQRE-Y---GDPSTSVKLS-----SAALEI---FOY--Q-----       | 2989 |
| PYTHIUM         | -KTFGAAQFYMTAD-----LDKSMTEFF-----TRAIDV---FQR--SCRSIPGEI    | 3279 |
| PLASMOFARA      | -KTFAKAAAFYAFND-----LDDLSKFKF-----YRSLDR---FKA--SCRRIDAVL   | 3241 |
| BREMLA          | -KTFANAAIFYSQD-----IDDNLKEIYF-----SRAVDM---FRA--SRRVDAVM    | 3224 |
| AEDES           | TTMELREIVR---SN--PQLGQSMEAQLV-----GHSRQS---LQK--SIVLSEDM    | 3288 |
| MIDGE           | PADFSSREILKLLDVS--DDVDTSNVTDHLL-----RFSELS---LKF--GR-KLAQKI | 3307 |
| BOMBUS          | NTIILKEINAE---N-N--ELSSIRNPLE-----TYSFNN---LKT--CCD-----    | 3157 |
| ANT             | NSTILRDIGITEPTS-T---HLSNIREVLL-----HYSLNN---LRY--CCS-----   | 3211 |
| WHIPWORM        | IEHFVQSSRA-TTKA-S---SYLNVADCLL-----CNAFDE---LKV--AI-----    | 3269 |
| TRICHINELLA     | LAEFCLSRWIKSKTDT-A--DISELVTMCY-----GQAFRY---LKL--SC-----    | 3259 |
| BEEFLE          | TL---TEVTQSVSS-K--DVAF-----FAANK---LKS--FLHNYNTS-           | 3116 |
| BARNACLE        | QLLEESGHWTDGAR-A--DLVQ-----LAFGR---LSA--AVEAARGS-           | 3173 |
| THRIP           | NKLQLPQVGSCEDIK-S--TLDT-----LGLNS---LIH--SKNIAKKH-          | 3192 |
| FLEA            | ILKHGQE---RGLSHS-K--TLDI-----PGFKC---LQK--SIKYAEA-          | 3208 |
| WHITEFLY        | -ELVSHELLFSTPLE-E---NLRK-----LGLFC---LKE--ALEWAGRT-         | 3284 |
| TICK            | ASTSSDPKMSLELR-E---QALQ-----LHLSA---AHC-----                | 3220 |
| TERMITTE        | ADRI GAPDCSQDTLM-Q---NALQ-----YGLSS---LKT--AAEVV---T-       | 3287 |
| DAPHNIA         | ---SRHAKVLELHWQP-----REIQTGLK-----H---AER---QQAIA-          | 3010 |
| OSTREOCOCCUS    | -----SAGDD-----SITYGIA-----AIEN---FTA--I---A-               | 3207 |
| STENTOR         | ----KMLLSYKTEA-----ADVLNCA---KQAFYI---L-----                | 2911 |
| KLEBSORMIDIUM   | -EIAERLRSQGTESWGGFSSGQAVVGNL-----GAAFRG---YSD--AVSILDGKK    | 3518 |
| CLUBMOSS        | -D-----KDLN---TNALSQSMALL-----GSAYKT---YSE--LLRNADSV-       | 3169 |
| MOSS            | -G-----EGAT---SQDITACFALL-----GSAFKT---YST--ALDNDPLS-       | 3324 |
| LIVERWORT       | -K-----LDTS-----SSTLDVSLSL-----GSAYGA---YSD--IVSEQFLA-      | 3373 |
| LIGNANO         | -AALLRQLASSPPSTGQANMRAEAEPD-----KSALSN---LQS--AASKADGV-     | 3666 |
| COPEPOD         | -HDLMWFSKYGTVS---DDNSALRSVLM-----NQVLEN---YRD--AAESG---     | 3197 |
| GLOBOSUM        | -KGVTKFVQR-IQS--K--PELMQFFL-----DRAKHN---ILA--IHALD---      | 3169 |
| PALUSTRIS       | -KTI--KSLGFEQPHD---G---TSLLRILT-----SRAYTC---LQ-----QA---   | 3227 |
| NEOCALLIMASTIX  | -SKFSKFIENPFT---GDTNSLIYFQ-----GRGLKR---LLE--TLKIYKHL-      | 3326 |
| GLOMUS          | -----KINMYFI-----ERYNL---FNN--ATKEISLQ-                     | 3247 |
| LOBOPOR         | ---SNWQSLISSK---AGEADIPKIQ-----QRGYEC---LRA--AAALE---I-     | 3317 |
| SYNCEPHALASTRUM | -KSAFKWLSRGLHD---A--KSVANTLV-----LSGTRY---LQD--ILKNA---V-   | 3310 |
| FUNGIVORUM      | -EADIKNQWQKPTG-----ENISNELY-----KKALEY---HVK--ASHLAKEAC     | 3279 |
| HALBUM          | -ENLKKNGLT-SLSS---LPTRLSSELF-----SLAYQS---YSQ--SIQLYDSNS    | 3437 |
| DPURPUREUM      | -ESFKKNELPSHLTS---IPINKLDELDF-----NLTFSK---YSE--SIKLEINK    | 3401 |
| PVIOLACEUM      | -DSIKKNQIGGSLSS---TSVNRRLDELDF-----SLTFKS---FSE--SISLSNENK  | 3425 |
| AMPHIPOD        | -AHLALVAKKFPVQ---NDPRSRYQSL-----MCALNA---OVQ--A--CELSDK     | 3385 |
| SHRIMP          | -QYMVLSKFFENA---NGKESWQRELL-----SCSYKS---LQL--AVNCABGKL     | 3348 |
| MUDCRAB         | -KYIKSLAEKFPNA---KDKSSWYKELL-----CCSYKS---LKS--AVNCGEEKF    | 3342 |
| TARDIGRADE      | -ADRQRLGLSSGTDV-----KPLY-----VRVFE---FAE--A-----            | 3382 |
| HYDRA           | -KKLATLSQFEGDKL---EPEK---TIK-----EKAWTA---LSL--AYEKSV---T   | 3250 |
| SALPINGOBECA    | -RAFVLLTQARAP---TDPKALPVGWRKVPKRRRAGQFAY---VSPFGDRVGNVPSHA  | 3456 |
| SPIDER          | -ENMAVSSLSKWK---SDLTIVSEIL-----DQSYSS---LKN--ITMCTSGLA      | 3357 |
| LIMULUS         | -EDQNRKLSI-AGS---TDSRRFIPKFL-----DVSYQY---LQK--GVHYITELQ    | 3420 |
| SCORPION        | -EKIQELTDT-FSI---QSKSKLEIDLDF-----CKNYEY---KCR--AIDIIQVEV   | 3382 |
| ROTIFFER        | -KHVLQLSDYVKND--INDFEKTISSLM-----KHGVND---LL-----           | 3337 |
| CIONA           | -ADIEQVKEIFGTDI---NADNIRQTLN-----NKAFKF---YLK--AAKFEALN     | 3395 |
| OTOPOUS         | -DIQQKISYAGYES--GTLSTKELSOKLI-----ISGCEY---LEK--NVISDDSEE   | 3322 |
| CAPITELLA       | -KLEKITESVGSIPA---LSHQEIVASLH-----EAAVNS---FKS--GVGVA---A   | 3358 |
| LIMPET          | -KTCDKLKNLLKTDN--LDKTQVNI VDDL-----QKSHQE---LKS--AISDSVVTR  | 3346 |
| SCALLOP         | -RNRQRLMDITGVSK---IDETELIESLV-----KRGFEN---MKK--SLHYEDDRN   | 3416 |
| LINGULA         | -RDIQKLEVAASCMSM-QNADMQEIINGLV-----DRGYQY---IKE--AVDIYEEDS  | 3375 |
| OYSTER          | -KNSEKIMGISKASK---LNPRELARCLV-----EEGYNQ---MRK--SLSYDGRG-   | 3370 |
| SNAIL           | -KTEKLLQYQYTK-SP---LKNQDLIKELI-----HHGYES---LRK--VISEVPEDS  | 3379 |
| SPONGE          | -GNTKLSLIGGTPS---TSTKALISEGLW-----IQALSQ---FNA--GVRSGTTLN   | 3423 |
| PRIAPULA        | -ATREKLSLVAGARE---HDHTALVSGLI-----SAGFRE---LRE--AVDVGDEEE   | 3419 |
| DANTO           | -EKVQKILQLSQAS---SIAQVVEGLQ-----IQALEL---LRS--AACKAESEE     | 3392 |
| ESHARK          | -DQAEVRIEHSQSSS---EEIQEVVIGLH-----RKTLYH---LER--AVRKAEEV    | 3414 |
| BHARK           | -ERAKNVKLSGATS---DNPVQVIGLY-----RKAHEY---LQS--AVKKAEEV      | 3404 |
| XENOPUS         | -KGAGVKDLN-----ESPENVVGLY-----RKSLEY---FTN--AVRKATEEE       | 3413 |
| STERLET         | -DKAGKVLDDLGTTS---DNLEQVVVGLH-----RKALQH---LQN--AVKKAEEEL   | 3418 |
| GAR             | -EKAGRVLKLGASS---SNPQQVTAGFH-----KRALGL---MQS--AVKKEVEV     | 3415 |
| HUMAN           | -DKARRILELGSQSS---EDSEKVIAGLY-----QRAFQH---LSE--AVQAAEEEA   | 3396 |
| PLATYPUS        | -NKARKVMELSGASF---DNVQKVIAGLH-----RRAPQY---LTH--AVRKAEEEE   | 3403 |
| TASDEVIL        | -SKAKVLELGSASS---EDAEMVIGLH-----KKAPEC---LFK--AARRAEDEV     | 3408 |
| COELACANTH      | -EKARKIQDLGSAQS---DHPQIVISLY-----RKALSY---LQT--AARKAEEOV    | 3412 |
| CABELLIAN       | -NKADKVLQSGTMS---ENPDEVAASLF-----KKSFIY---LDS--AVKKAEEEV    | 3415 |
| CANARY          | -EKARKVLSGLSL---ENPKVLAAGLN-----KRAFQC---FSC--AVRKTSEEV     | 3404 |
| OSTRICH         | -EKARKVSVLGSSEL---ESPEKVLAGLN-----KRAFQC---FSS--AVRKEEEV    | 3374 |
| GECKO           | -EKARKVVLVSGEKT---DDIGKVIAGLN-----TRAFQC---FSS--AVRKAEEEI   | 3414 |
| TURTLE          | -EKARKVVMVLSGERP---ENSEKVIAGLN-----KKAFOY---FST--AVRKAEEEV  | 3413 |
| ALLIGATOR       | -DKVRKVMVLSGEEKP---DSPEKVIASLN-----KKAFOY---FST--AVRKAEEEM  | 3371 |
| APLYSIA         | --TRTKLAAQANAGA---GTYEQLVNGLI-----SKGFHS---LKA--AVSEEGSRS   | 3437 |
| TRICHOPALAX     | -KKESLYQLANVQH---DSKEKIAAKLT-----SHACQA---LHQ--AVKASKEER    | 3394 |
| SOFTCORAL       | -AKEKHLGLCSSKNP---EQDKILGHLT-----TKSFTT---LQR--AIKIAQTNE    | 3411 |
| STONYCORAL      | -AKNALVKLCRIDET---ESQKVVSDLM-----TKSFTS---LQS--AIKAAKNAE    | 3429 |
| SEA_ANEMONE     | -CLINQPVDKSYCPG---NVCLQIVSGLI-----TRSFST---LQE--ANKAAKQAA   | 3379 |
| SEACURE         | -GKFDKMLMAGQS---SSISAISSGLY-----TKALKQ---LQE--ISDHSK---     | 3407 |
| LANCELET        | -RHAQLTLAAGVSPD---TSDVQTISSLL-----QKHGAC---LQK--AVKLASDEE   | 3431 |
| STARFISH        | -GKLDKLLGVQNR---TRPEQICSTLY-----SKAVYSE---LQK--AVSLAKDD     | 3434 |
| SEA_URCHIN      | -GKLDKLLSKAEQCE---SKPERVQCSLF-----MKSKEY---LDD--AVGTIKLDP   | 3429 |

Supplementary Figure 6 CLUSTAL OMEGA ALL PHYLA, EXPANDED

|                 |            |                                                          |      |
|-----------------|------------|----------------------------------------------------------|------|
| PARAMECIUM      | ---        | IQLHDE-NINQSKFYNKAAAMFCERCLR                             | 3258 |
| TETRAHYMENA     | ---        | ---NFNS---SEQIFEEIIPMLRKSFKRPFANFCEQLLR                  | 3585 |
| STYLONCHEIA     | ---        | ---KVQT---AAQFDQMKKTMAKTYFKFAQPSDKILR                    | 3499 |
| APHANOMYCEsa    | ---        | ---TAKATMTSMHVMYIEYLDRKCLE                               | 3084 |
| APHANOMYCEse    | ---        | ---TSKATNVTMHLTYIEYLDKIE                                 | 3012 |
| PYTHIUM         | TMV        | ---ALSRESEQSFSCRVTYIEYLIDILF                             | 3308 |
| PLASMOPARA      | SK         | ---QSQDDAPPFLRCRTTYIEYINDLLY                             | 3269 |
| BREMIA          | SN         | ---DLREGGSSRFRLRCRTTYIEYINDLLF                           | 3252 |
| AEDES           | FDD        | ---STARSDVALLADCKFKQDQYEQLE                              | 3318 |
| MIDGE           | LD         | ---TNSYMNEMTMLGEVHKLQYQYQVYE                             | 3336 |
| BOMBUS          | ---        | ---MTTKNIKECYFSLAKIYDRLL                                 | 3179 |
| ANT             | ---        | ---QDTTKLGEHYCTLAKIYGRLN                                 | 3233 |
| WHIPWORM        | -SL        | ---CSKNRESYRQLTEPHLVMEVYVSKILR                           | 3298 |
| TRICHIANELLA    | -QY        | ---SSQLNIESPKLTEPLMELSSYDRILR                            | 3288 |
| BEETLE          | -DV        | ---CT---DAYIQYADAYVQIAYFAKN---                           | 3139 |
| BARNACLE        | ---        | ---PEAADACLEARRPGRQLE                                    | 3192 |
| THRIP           | -KD        | ---ASS---FLTEQTAEAYLQIDQVNRNLE                           | 3219 |
| FLEA            | -HA        | ---NNDINIEISTVTNICYKMIQNMH---                            | 3234 |
| WHITEFLY        | -ES        | ---VNQE---TVLADAHMKIVRIMFGVYN                            | 3309 |
| TICK            | -K         | ---ATPV---SVRAEAQRLDARRMNTALQ                            | 3244 |
| TERMITE         | -PR        | ---GNSE---QAVAKAYLQKIKRERAHSN                            | 3312 |
| DAPHNIA         | ---        | ---EMQIKFPMAEAYFTIKKISEWKN                               | 3035 |
| OSTREOCOCCUS    | ---        | ---ETSKNVEHAVDASLRLAHDAALK                               | 3232 |
| STENTOR         | ---        | ---NQVRHTISALKPFRINDMILR                                 | 2932 |
| KLEBSORMIDIUM   | GSPAA      | ---LSSGDNGTAEREARRQSKASLKPARINDVLQ                       | 3555 |
| CLUBMOSS        | ---        | ---PPSREMARSTFKFACINDLLN                                 | 3191 |
| MOSS            | ---        | ---EITTGSLSPHDTAKALKFGLFIDELLK                           | 3352 |
| LIVERWORT       | ---        | ---LGREKPKASRQLAKISLSPGLFIDELLK                          | 3401 |
| LIGNANO         | ---        | ---GPAVDGSSSLQCHLELIRIDSCLL                              | 3691 |
| COPEPOD         | ---        | ---NASPDQGMLEGSTVHRLLT                                   | 3219 |
| GLOBOSUM        | ---        | ---VPSFRFQKLEVGMVDRKTLR                                  | 3191 |
| PALUSTRIS       | ---        | ---VSASPKDKHRIRISIHIDRILR                                | 3249 |
| NEOCALLIMASTIX  | ---        | ---DMTEENKTYLSTLMTIDQSYK                                 | 3348 |
| GLOMIS          | ---        | ---LKPSMBAKILVKNKIDYFLR                                  | 3369 |
| LOBOSPOR        | ---        | ---GEDMVRKRLRNPDSINDKVLR                                 | 3338 |
| SYNCEPHALASTRUM | ---        | ---ENTRLRAECVWRLEINDNALR                                 | 3332 |
| FUNGIIVORUM     | ---SGS     | ---QNKMYAKSQLKALINDEMIK                                  | 3303 |
| HALBUM          | NNNN       | ---DTHKSKSAYLQFNINDTELQ                                  | 3462 |
| DPURPUREUM      | NKQSNQ     | ---TGSSQQLSSQVNNPQSNNNPSSQTSSEINNFNLEKTKIKSAHLKPFANFNILK | 3461 |
| PVIOLACEUM      | KDQH       | ---VDKHKSANLKPANFNINDVLR                                 | 3450 |
| AMPHIPOD        | INS        | ---EMLDGNLVSSYHQTHTSLAVFEDCIS                            | 3416 |
| SHRIMP          | VKS        | ---DALNQDSSKSDSAHALVKEECVI                               | 3379 |
| MUDCRAB         | MQL        | ---NNLYEGAH-SHSKDIYMTLAKVEDCLE                           | 3372 |
| TARDIGRADE      | ---        | ---CERAVDAVPFLRTPQINDQLR                                 | 3404 |
| HYDRA           | C          | ---KISTDLDSKLLHHKAYMEMPLIDELLE                           | 3278 |
| SALPINGOBECA    | PKFNNKPLDV | ---LFPSATAYGSETLMAFVRLREDAVQLQ                           | 3494 |
| SPIDER          | ---        | ---NPNVDMTRKSVAAAHMELANIKRYLC                            | 3384 |
| LIMULUS         | DAL        | ---H---HTQMVSTSVHCTTDPHMSLAFINKYL                        | 3452 |
| SCORPION        | QK         | ---H---MIEFDQATIGETYPKFPANINKILR                         | 3409 |
| ROTIFER         | ---        | ---KIKDSLKGSLELATINDFYLR                                 | 3358 |
| CIONA           | NI         | ---GEGSLQKSYLADAKINDQFLR                                 | 3419 |
| OCTOPUS         | KSV        | ---S---VRESIGETHLAIKVNQFQLQ                              | 3347 |
| CAPITELLA       | SQ         | ---PESVCVNKAYMSLVHINDQVLR                                | 3382 |
| LIMPET          | SR         | ---SESFTEADAQIALSKINDKFLR                                | 3370 |
| SCALLOP         | SK         | ---QTYTRDMAFMAVKNINDRILR                                 | 3440 |
| LINGULA         | SN         | ---DKS---TWETHMADAKINDRYLK                               | 3397 |
| OYSTER          | TR         | ---TCRYGLEEAYLADAKINDKFLR                                | 3394 |
| SNAIL           | SR         | ---DAVCLQDQVQALAKINDRYLR                                 | 3403 |
| SPONGE          | PL         | ---TKDVPFTQSLRELSINDNALR                                 | 3448 |
| PRIAPULA        | SSA        | ---S---LASSPSAAHVMSINDYFLR                               | 3444 |
| DANTO           | QSF        | ---S---QQHVNTHGIVEAYMTINDRRLR                            | 3421 |
| ESHARK          | QSL        | ---A---GEHVDIAGVIEAYVNLINDRCLR                           | 3443 |
| BSHARK          | QSL        | ---S---EEHVDTVGVIKAYMTINDRCLR                            | 3433 |
| XENOPUS         | QSH        | ---S---TDQIDVRGIIKAYMTINDRSHLR                           | 3442 |
| STERLET         | QSR        | ---S---TEHIDIPGATEAYMTINDRKRRL                           | 3447 |
| GAR             | QSR        | ---S---ADHVDTAGATEAHTMTINDRKRRL                          | 3444 |
| HUMAN           | QPP        | ---S---WSCGPAAGVIDAYMTINDDQQLR                           | 3425 |
| PLATYPUS        | QSH        | ---S---SEHVDVGGVIDYMTINDRKHRL                            | 3432 |
| TASDEVIL        | QSH        | ---T---TEHVDIAGVIDAYMTINDRHLR                            | 3437 |
| COELACANTH      | QSR        | ---S---TEHIDVAGVIEAYMTINDRKRRL                           | 3441 |
| CAECILIAN       | QSR        | ---A---MEHVDTVGVIKAYMTINDRTHLL                           | 3444 |
| CANARY          | QSS        | ---S---VEHVMVGVVDAYMTINDQYLR                             | 3433 |
| OSTRICH         | QSH        | ---S---MEHVDVAGVIDSYMTINDQHLR                            | 3403 |
| GECKO           | QSL        | ---S---FDHINTKSIDAYMTINDTHLR                             | 3443 |
| TURTLE          | QSH        | ---S---MEHVDLTGVIDAYMTINDRKHRL                           | 3442 |
| ALLIGATOR       | QSR        | ---T---MEHVNLTGVIDAYMTINDRKHLLH                          | 3400 |
| APLYSIA         | GGA        | ---E---VRQTAHTCEANLELAKINDKYL                            | 3465 |
| TRICHOPLAX      | ---        | ---GGSSYIEAMMMVINDDILR                                   | 3415 |
| SOFTCORAL       | NN         | ---QKNAESVRNLVTSMTINDRDLR                                | 3439 |
| STONYCORAL      | GK         | ---CNTTQTSQTVDMAMTINDNCLR                                | 3456 |
| SEA_ANEMONE     | T          | ---SSSDGTTTCMVEAMMAMPINDRALR                             | 3406 |
| SEACUCU         | ---        | ---KSDSVEGESKTAESFVALCKINDRILK                           | 3434 |
| LANCELET        | KA         | ---RQDTSLDKSGIVDAFMAVINDKILR                             | 3460 |
| STARFISH        | A          | ---VTSQSERSMTEAYMTINDRMLR                                | 3470 |
| SEA_URCHIN      | ASH        | ---S---LSSSAKREBQSMAKAHMALINDQLLR                        | 3461 |

Supplementary Figure 6 CLUSTAL OMEGA ALL PHYLA, EXPANDED

|                 |                                                         |      |
|-----------------|---------------------------------------------------------|------|
| PARAMECIUM      | VIEPDSGGSND-----LRKILEKNISLDMIADQFVRYIISSFKFNAN----     | 3301 |
| TETRAHYMENA     | LIIESESRDHL-----KRTLKVQYQVLTVEITVGSSFLEYILKCFSLMGGINQPE | 3632 |
| STYLONCNCHIA    | KMENDQCRVY-----ITNSLKQLNKSEEQVARDIKYIILSL----NH---      | 3538 |
| APHANOMYCESA    | RSTAGTF-----GSLAKAMVETVLFMGAL-ADK-----                  | 3111 |
| APHANOMYCESA    | RTSPSS-----TDLVNOFVTNVLWGMSM-ADK-----                   | 3037 |
| PYTHIUM         | SEKRAEWMT-----LVEQRTMLESLIENVLGMVA-GDQ-----             | 3341 |
| PLASMOPARA      | KRQLEKLAN-----FADSKVLKLLAENVLRGMAA-GDR-----             | 3302 |
| BREMLIA         | KPQLEKLAK-----LADRRTLVLKLLDNVNLGGIAA-GDR-----           | 3285 |
| AEDDES          | VEVLGE-----TLDLERQLVTALAAAMQY-GSK-----                  | 3345 |
| MIDGEE          | SGALTS-----KIQIKHLESIFRALTH-GSS-----                    | 3362 |
| BOMBUS          | BHDT-----DIQSKSEFHSILKAMSY-GSL-----                     | 3294 |
| ANT             | TEPE-----NDEIIPHDFLSSILKSMFY-DYL-----                   | 3258 |
| WHIPWORM        | ALEEELW-----LPGNA-----                                  | 3310 |
| TRICHNELLA      | KNGHTSL-----VNSECACVMVRSILKSMKN-GSH----                 | 3317 |
| BEETLE          | -----OGKKYFKDFMLFVLRAMKF-NSK-----                       | 3161 |
| BARNACLE        | ALEETEAGG-----PGAELRGPVRCILWALAA-GSA----                | 3223 |
| THRIP           | NQEGSSG-----TNTIARHLVKALLCAMKC-GSN-----                 | 3247 |
| FLA             | --NLKYAEDD-----LKSVMILSMIKSILKAMAL-GSV-----             | 3264 |
| WHITEFLY        | QOEE-----APEEYNQYFIRSLISAMEY-NSE-----                   | 3335 |
| TICK            | QEEGTLFPDD-----RRTSLPLSLVRSVLTAMRL-GSD-----             | 3276 |
| TERMITE         | TS-----REDNFGTIDVTSILRAMRY-GSK-----                     | 3336 |
| DAPHNIA         | V-----ISDEYRGLIIRSVLSSMRY-GSV-----                      | 3059 |
| OSTREOCOCUS     | KLHGDIQAQASISNSC-----AALEAVMLAENMLSQVPERMLKSLMFMVTO     | 3280 |
| STENTOR         | SYEENGENYV-----IGKCLANMDVTGMLAETVSSLOSMKL-GVQ----       | 2976 |
| KLBSORIMIDIUM   | LATGEADQOTQNSTALPPEMTSALAGCTDSGLPPVSYQPPVVKHVLRALSL-DAS | 3610 |
| CLUBMOSS        | TADDSKWKSEVRR-----SIQDSRQSGFVTSFVFREAMVTNMLRPLSM-DAS    | 3238 |
| MOSS            | LSQOPEERSOMT-----OHHLFGLPOASDLSLLVRHMLKALAL-DST----     | 3394 |
| LIVERWORT       | AAKSMECRDDIRS-----GILQGHATARLPASAYPSVIVKHMEALS-DAS      | 3448 |
| LIGNANO         | EAAPNQPPQPF-----RAALRAQAVDSVLSAMRC-GSQ----              | 3723 |
| COPEPOD         | AEGN-----SIEYGELCVSYHLKSMKA-GCL-----                    | 3244 |
| GLOBOSUM        | CVEADE-VST-----KFMGHQPESAKVIHHSIFRAMSM-GSL-----         | 3226 |
| PALUSTRIS       | RMEEEWGVSGD-----LQAFI-DTCLYARMTVITNLLAAMKS-GKR-----     | 3287 |
| NEOCALLIMASTIX  | RIENSINENTL-----KDKDSMNYEYSKILIKYLKALKY-GSI----         | 3387 |
| GLOMUS          | KLDFTEE-----QTQTFDPAQYASNVVTSILQAMEN-GSK-----           | 3404 |
| LOBOSPOR        | HHENERSKGGG-----ESSILSTKDLAVHANLVKSNLISIRD-GEL----      | 3379 |
| SYNCEPHALASTRUM | ANEDPSS-----KITVVKLDDTDYIAQVITQNYESEM-DVV-----          | 3267 |
| FUNGIVORUM      | S-----GSKDELGDHVVRGVDMAMIF-EYP-----                     | 3328 |
| HALBUM          | RRGDQ-----SEDSNRLLAVSVNNSINNAIKQ-EIP-----               | 3491 |
| DPURPUREUM      | DKLQSNNGQ-----INEETLNLALTVIKSILEAIRE-ELP-----           | 3495 |
| PVIOLACEUM      | DKQSTQSNIF-----SVDSENIQLAKSIRSILEAIRE-EIP-----          | 3487 |
| AMPHIPOD        | AWSESIQ-----VDEYLKILVTSILKAMTA-GSR-----                 | 3444 |
| SHRIMP          | KWKDHVD-----VSQYSKSLMVSVLRAMAN-GSR-----                 | 3407 |
| MUDCRAB         | KWKESID-----VSDYADSLMVSVLRAMSL-GSR-----                 | 3400 |
| TARDIGRADE      | KGILDDVVL-----VERGASLKAIKL-GSV-----                     | 3430 |
| HYDRA           | NEENSEMKC-----CYAKTMVDSLKAMAM-NSS-----                  | 3306 |
| SALPINGOECA     | DRIAMP-----KDSMGRVQVVFETALAMRS-GNV-----                 | 3524 |
| SPIDER          | AENAKNFDLKK-----IPSFNEFPRIITESLDLALKY-GST-----          | 3419 |
| LIMULUS         | KKEDATEDAWI-----PNSLPSYPTTLVTSLLTAMRQ-GSK-----          | 3487 |
| SCORPION        | NQEEE-EKTL-----SLSPFTYPSVLSLMLALKM-GNL-----             | 3442 |
| ROTIFFER        | IAENDNDPFE-----KLTLIGMIRSQFPEIIVBEQLFYSIRS-GSL----      | 3398 |
| CIONA           | NGDQAEGLLSP-----TSKSVKVEYAVTMTYVLRAMRI-QSG----          | 3456 |
| OCTOPUS         | DSPS-----LGNMLSSLLKAIKY-GIK-----                        | 3369 |
| CAPITELLA       | QRENDEISG-----TKSEEDFPLALVTSLLSAMKN-SSK-----            | 3417 |
| LIMPET          | MKENEEEH-----IKEKVIENYGETIICLLKAMKL-GSM-----            | 3404 |
| SCALLOP         | MVEDDELE-----LSKATIKTFPDTVVVCLNAMRF-DSM-----            | 3474 |
| LINGULA         | LREEDDSL-----TGESIDSYPEAVVTSILRCIEL-DHM-----            | 3430 |
| OYSTER          | MAEDDTKESLN-----LSKECQKNFPETIIVCLINAMKL-DSM-----        | 3432 |
| SNAIL           | LAEENDGL-----VASESMEVFPATAVKCLDAMRA-GSA----             | 3437 |
| SPONGE          | QEDHDDEQST-----GLDTKSFPSIINHPTLAMS-LGSS-----            | 3482 |
| PRILAPULA       | VREDDGTT-----VLPTDGYAETVITSLRAMAL-GSS-----              | 3476 |
| DANIO           | ESEQKEAI-----SSKQSLPEHVVKMMLKALKL-SSE-----              | 3454 |
| ESHARK          | EKEESATAIN-----FSEQOTFPACVNEKILKAMKY-NSK-----           | 3477 |
| BHARK           | EEEESENINN-----FPELQTYPASVVENMLKALQY-NSR-----           | 3467 |
| XENOPUS         | KVEESAVMD-----RADYQNFPEIMVEKMKALKL-NSS-----             | 3476 |
| STERLET         | EEEEAEVST-----FSELPTFPVAVVDTMLKALKL-NSK-----            | 3481 |
| GAR             | EEEEQVSE-----FSELPTFPVAVVDTMLKALKL-NSK-----             | 3478 |
| KEEENASVID      | KEEENASVID-----SAELQAYPALVVEKMLKALKL-NSN-----           | 3459 |
| PLATYPUS        | NEEEGTSVID-----AVVLQAYPALVVEKMLKALKL-NSR-----           | 3466 |
| TASDEVIL        | KEEESTSVIH-----TVELQTYPALVVDKMLKALKL-NSK-----           | 3471 |
| COELACANTH      | EVEESAEVSH-----FSELQTFPAVVENLRLALKL-NSR-----            | 3475 |
| CAECILIAN       | KKEDTTAVID-----HSHLQQFPPTIVVEKMKALKL-NSK-----           | 3478 |
| CANARY          | REBEGLLEIN-----TVDLQQFPPIVVEKMKALKL-NSR-----            | 3467 |
| OSTRICH         | REBEGLLEIN-----TADLQLFPPIVVEKMKALKL-NSR-----            | 3437 |
| GECKO           | KEEESADIN-----AVDLQMPPIVVEKMKALKL-DSK-----              | 3477 |
| TURTLE          | KEEESDVIS-----ALDLQTFPIVVEKMKALKL-NSR-----              | 3476 |
| ALLIGATOR       | KEREGLSDIS-----AVDLQTFPTIVVEKMKALKL-NSR-----            | 3434 |
| APLYSIA         | LLEDD-ELPA-----RCDTSQFPRTVVLCLRAIKG-GQL-----            | 3498 |
| TRICHOPLAX      | HEEDGRANQPK-----GLIDTKIFPEVIRYILEAMAY-NSM-----          | 3451 |
| SOFTCORAL       | MKEEDSEQTP-----RLDMKLFPGIVIRFVLKSMFA-ESA-----           | 3473 |
| STONYCORAL      | KKEVS-VAPV-----EVDTKLFPPIVVRVYMLKSMCY-SSK-----          | 3489 |
| SEA ANEMONE     | RKEEDSDGSPFI-----ISPFGLHYEFVQRFPEFVVRVYMLKAMEH-GSE----  | 3450 |
| SEACUKE         | MKDADDLPST-----TLPLTANFPSTVVKSLTAMRY-SSS-----           | 3470 |
| LANCELET        | HQEDD-EEGTE-----LSSIPGLAAAVSNLQALRH-DSP-----            | 3494 |
| STARFISH        | LKESD-EVPMPT-----YLPQTDNFSQTVVHYTLKAMHY-SSQ-----        | 3505 |
| SEA URCHIN      | QQDDD-DCNPD-----YLPMEAYPSTVNSLQAMNL-NSP-----            | 3496 |

Supplementary Figure 6 CLUSTAL OMEGA ALL PHYLA, EXPANDED

|                 |                                                          |      |
|-----------------|----------------------------------------------------------|------|
| PARAMECIUM      | -----OLNKIETLILKVIKVVQKFPN-----                          | 3322 |
| TETRAHYMENA     | QKSNKMQMEVETGEKIQENPEKSNQSIQIEFDONMSNLVLMRLI IQQIPN----- | 3682 |
| STYLNCHIA       | -----EYQNASDILPRLLDITSKYKD-----                          | 3559 |
| APHANOMYCEsA    | -----TCAAYFPRVLGLVRDHFA-----                             | 3129 |
| APHANOMYCESe    | -----GCSAYFPRVLGLLRHPT-----                              | 3055 |
| PYTHIUM         | -----ECSNYLPQLCELIPFPFV-----                             | 3359 |
| PLASMOPARA      | -----ECANYFPGLCDVVSPPYD-----                             | 3320 |
| BREMIA          | -----ECAHYFPQLCDVVSIPYQE-----                            | 3303 |
| AEDES           | -----SARQLFPCLLQLPFLQDG-----                             | 3363 |
| MIDGE           | -----DAKFFIPWILQLPYLKNM-----                             | 3380 |
| BOMBUS          | -----EAAHYFPCLLKPEYFNQD-----                             | 3222 |
| ANT             | -----EAMHYFCLLKERFKQE-----                               | 3276 |
| WHIPWORM        | -----VYSL-F-KRTPSIQYQP-----                              | 3325 |
| TRICHINELLA     | -----LARQLFPRLLSVMEKYP-----                              | 3334 |
| BEEBLE          | -----EGKQLFPCVLMBQEFSL-----                              | 3178 |
| BARNACLE        | -----EACDWLPRLLQLADEHP-----                              | 3240 |
| THRIP           | -----RARQLFPLLLQLPTLSS-----                              | 3264 |
| FLEA            | -----EAKQLFPVLLLEYDEISA-----                             | 3281 |
| WHITEFLY        | -----EATQLFPCLLQLECLEIS-----                             | 3353 |
| TICK            | -----AAIDMPFRLQLVLSHP-----                               | 3293 |
| TERMITE         | -----DARQLFPCLLQLPGLDT-----                              | 3353 |
| DAPHNIA         | -----DGQGLFPLVILALKDDCA-----                             | 3077 |
| OSTREOCOCCUS    | -----QSLPARHLLPRLLVLRDHMS-----P                          | 3302 |
| STERNOR         | -----RADMFPRLGLGFK-YQN-----                              | 2993 |
| KLEBSORMIIDIUM  | -----LKPQLVPRVLLVGVQKE-----                              | 3629 |
| CLUBMOSS        | -----VGPQLAVARLLSMAGHO-E-----                            | 3256 |
| MOSS            | -----LQAQHAVARLLSLVGFSSA-----                            | 3413 |
| LIVERWORT       | -----VRAQHGLARVLLSLVGQYPE-----                           | 3467 |
| LIGNANO         | -----EASIRFPRLCLLGSADDEASQNPAD-----                      | 3751 |
| COPEPOD         | -----AARELFPRLLSLVLENDI-----                             | 3262 |
| GLOBOSUM        | -----KAVEFPRLQLILETYPE-----                              | 3244 |
| PALUSTRIS       | -----DATEAYPRLLQLEIYEE-----                              | 3305 |
| NEOCALLIMASTIX  | -----EGIQLFPRLLQLEIENDES-----                            | 3405 |
| GLOMUS          | -----EATELFPRLLQIIEKYHN-----                             | 3422 |
| LOBOSPOR        | -----GATELFPRLLQIIEIYPS-----                             | 3397 |
| SYMCEPHALASTRUM | -----EATIRFPRLLELERYPE-----                              | 3385 |
| FUNCTIVORUM     | -----EASDFPRLLIETGYSY-----                               | 3346 |
| HALBUM          | -----GATEKFPRLLEIISQYEK-----                             | 3509 |
| DPURPUREUM      | -----GSDKFPRLLEIITQFEQY-----Q                            | 3515 |
| PVIOLACEUM      | -----GAIDKFPRLLELLQFDKS-----L                            | 3507 |
| AMPHIPOD        | -----VSHFNFPRLIHLMEDHAE-----                             | 3462 |
| SHRIMP          | -----DAHFFFPRLINLMEDAS-----                              | 3425 |
| MUDCRAB         | -----EAHFHFPRVINLMSDDSS-----                             | 3418 |
| TARDIGRADE      | -----EARDLFRLVWLRHPN-----                                | 3448 |
| HYDRA           | -----KARIAFPRLQVNLFPSS-----                              | 3324 |
| SALPINGOECA     | -----LMROYFPOLLNLGERPTD-----                             | 3542 |
| SPIDER          | -----DAHLFPRLQIIEENPS-----                               | 3437 |
| LIMULUS         | -----AAMQLFPRLLQVLELYPG-----                             | 3505 |
| SCORPION        | -----NAILFPRLQIIEVYPD-----                               | 3460 |
| ROTIFFER        | -----EARTFPRLQIIEIY-----                                 | 3416 |
| CIONA           | -----DLKASMSFPRLQLVODFRG-----                            | 3477 |
| OCTOPUS         | -----EAQRFRLQLLETHAE-----                                | 3387 |
| CAPITELLA       | -----DARQLFPRLLQIIEIRFPQ-----                            | 3435 |
| LIMPET          | -----EATIRFPRLQVLELYPD-----                              | 3422 |
| SCALLOP         | -----EAKQRFPRLLQVLEHYPD-----                             | 3492 |
| LINGULA         | -----DARQRFPRLLQVLEHYPD-----                             | 3448 |
| OYSTER          | -----EARQRFPRLLQVLEMYPE-----                             | 3450 |
| SNAIL           | -----EALERFPRLHIIEHYPD-----                              | 3455 |
| SPONGE          | -----KARELFPRLLQVLEHAPD-----                             | 3500 |
| PRIAPULA        | -----EARDSFPRLQLVDLYPD-----                              | 3494 |
| DANTO           | -----EARLKFPRLLQVLEHYPA-----                             | 3472 |
| ESHARK          | -----EARLKFPRLLQIVELYSA-----                             | 3495 |
| BHARK           | -----EARLRFPRLLQIVELYPV-----                             | 3485 |
| XENOPUS         | -----EARLKFPRMLQIIEQYPS-----                             | 3494 |
| STERLET         | -----EARLKFPRLLQIIELYPA-----                             | 3499 |
| GAR             | -----EARLKFPRLLQIVELYSA-----                             | 3496 |
| HUMAN           | -----EARLKFPRLLQIIERYPE-----                             | 3477 |
| PLATYPUS        | -----EARLKFPRLLQIIERYPE-----                             | 3484 |
| TASDEVIL        | -----EARLKFPRLLQIIERYPE-----                             | 3489 |
| COELACANTH      | -----EARLKFPRLLQIIELYPA-----                             | 3493 |
| CAECILIAN       | -----DARLKFPRLLQIIELYPA-----                             | 3496 |
| CANARY          | -----EARLRFPRLLQIIERYPA-----                             | 3485 |
| OSTRICH         | -----EARLRFPRLLQIIERYPA-----                             | 3455 |
| GECKO           | -----EARLKFPRLLQIVELYSA-----                             | 3495 |
| TURTLE          | -----DARLKFPRLLQIIERYPA-----                             | 3494 |
| ALLIGATOR       | -----EARLKFPRLLQIIERYPA-----                             | 3452 |
| APLYSIA         | -----EARERFPRLQLPELYPD-----                              | 3516 |
| TRICHOPLAX      | -----DARQRFPRLLQIVERNPN-----                             | 3469 |
| SOFTCORAL       | -----EARQKFPRLLQVLELYPG-----                             | 3491 |
| STONYCORAL      | -----EARQKFPRLLQIVHYPD-----                              | 3507 |
| SEA_ANEMONE     | -----EARNRFPRLLQIVELYPH-----                             | 3468 |
| SEACUKE         | -----EAKQRFPRLLQIIETYPE-----                             | 3488 |
| LANCELET        | -----EARQRFPRLLQVLEIYPD-----                             | 3512 |
| STARFISH        | -----EARQRFPRLLQVLEACP-----                              | 3523 |
| SEA_URCHIN      | -----EARQHFPRLQLVEKYP-----                               | 3514 |

Supplementary Figure 6 CLUSTAL OMEGA ALL PHYLA, EXPANDED

|                 |                                                               |      |
|-----------------|---------------------------------------------------------------|------|
| PARAMECIUM      | QIGPVFQDAV-EKGHLE-TWITLQVLEPLIHLIN-D-----NV-RFOYFKRIFDDFI     | 3370 |
| TETRAHYMENA     | MTGQKFKKAL-ELQIIP-SIPIISFLPMMHILK-K-----QN-LVEFFPEPLIKKIA     | 3730 |
| STYLLONCHIA     | HVQGDV--IA-YSKETP-TVYLRWINGIVVWV-R-----PE-SS-VIEEKVIQID       | 3604 |
| APHANOMYCESa    | DLLPILTSKM--QVPP-LWTCLHSAQIMMLDVH-----ATPF--NDWLSLLETMA       | 3177 |
| APHANOMYCESa    | -LINMAREKL--KQIP-LWTCLHSAQVMMLMEK-----PSPF--NDFILTLLEMM       | 3102 |
| PYTHIUM         | IVAKFEKRL--SEVP-MWTCLRWAGLLLVN-----GPI--GKSVLILEKMA           | 3404 |
| PLASMOPARA      | IVAECKQCVL--TDVP-LWTCLQSAQMLMLN-----GDI--GMTIVAILEKTA         | 3365 |
| BREMIA          | IVTDFEQVVM--KNVP-LWTCLQSAQMLMLN-----GPI--RRTVLVILEKMA         | 3348 |
| AEDDES          | TLHGCFNEAS--HPVP-EWMLRWIPOLISVVD-F-----SQ--QSFLKALLTRIN       | 3408 |
| MIDGE           | ELTSQFNNQL--TLVP-EWMLTSVYSIMMSVYD-F-----EA--DCYLDELIMRPA      | 3425 |
| BOMBUS          | ETKDFPKKEI--ESHL-TMLPLSAGLLFSLH-T-----SI--APLITPVLKRM         | 3267 |
| ANT             | QTRNFFVEEC--AKLR-PMLLRWVGLLFLK-R-----TFFINRSTPSI--AIALITPVRRA | 3329 |
| WHIPWORM        | DCRSTFVRES--QVPP-TLTLGLMLDILLVVD-S-----SW--GCCFTEVINRHA       | 3370 |
| TRICHINELLA     | ESELEFQAEI--DSVP-SMMLSNMOMLSALK-R-----S---NKFYSILIERL         | 3377 |
| BEEBLE          | EEQQLFLTET--EQIP-VMLKLPITLIVLD-S-----SK--VTVIXPLVLKIA         | 3223 |
| BARNACLE        | PAAALADGW--EAVP-EIRFLAWLPOLFSYGA-SA-----GC--GGTVRRLLRLA       | 3286 |
| THRIP           | NLSKDFAEKS--SSIP-VMMFLGWPOLLMLD-S-----PA--AKLVAPLLLKIA        | 3309 |
| FLEA            | DMKDVLELS--AQVP-EWMLFQWAPOLLACL-S-----NR--SETIGPIVIRVA        | 3326 |
| WHITEFLY        | EMSELFKNQC--KRIP-EWKFLEWVPLLALY-S-----PK--VAASDILLRLA         | 3398 |
| TICK            | LCKGSFAECC--AKVP-CMPLGWIQMLPLD-G-----AV--GPHLPLGLVDSIA        | 3338 |
| TERMITE         | SLSELFHKES--SAVP-VMMFLGWNQILLACL-T-----PV--GPVLHDLILRLA       | 3398 |
| DAPHNIA         | -FTHAFETLR--CDVP-LMFLPWNQIVSYFI-S-----SSAIPKLLIDTA            | 3119 |
| OSTREOCOCCLUS   | QTAEYSQTL--LRVP-SHLFDIPEGLSMVSDT-----QL--HAVVSPILRRDL         | 3348 |
| STENTOR         | -VAKIFMEL--EQIP-EWMLRWVGLLFLK-R-----PE--CMVFAKIMERL           | 3037 |
| KLEBSORMIDIUM   | -TLAEFGCV--ESVP-SWVLSVWVPLISWV-Q-----PE--GRVLRVLRVA           | 3673 |
| CLUBMOSS        | -IQAIFSARI--DKVP-SHTLGLWLPOLLMLD-S-----RE--GGLFGLILESIA       | 3300 |
| MOSS            | -TQNEFERPL--DNV-SVFNVAWIPMLNIR-E-----DS--GRVLKVLLESIA         | 3457 |
| LIVERWORT       | -THTQFADVV--KQVP-CVFSWIPOMLWVD-Q-----DE--GNILVPLVENV          | 3511 |
| LIGNANO         | SLSSRFSRQM--ASVP-VMLSLPWLPLVSLD-K-----PDQGSVAVLPLESVC         | 3798 |
| COPEPOD         | -AGKTFEDNW--STVP-SMMLPWSNQLISCLIND-EI--SKYFPVVSXMS            | 3307 |
| GLOBOSUM        | -VANDFSVHS--QDVP-TMMLRWLPOLLSELD-K-----VT--GLTLPLVQKIS        | 3288 |
| PALUSTRIS       | -TADDFORMA--TSVP-SWTLRWMPOMMLD-K-----PS--AQAVVPVIEKIA         | 3349 |
| NEOCALLIMASTIX  | -NQAFIKNI--EGIP-PMLLRWIPITLILLD-K-----DC--GYTLIPLLKRIA        | 3449 |
| GLOMUS          | -TQSIFKEKV--ESISVVKFIRWIPIVAILD-Q-----SI--AHCVPPIFKIA         | 3467 |
| LOBOSPOR        | -SQKPFTEHV--TDLGSRVTVRWIQMVAVLD-K-----PI--GACVMPILKRIA        | 3442 |
| SYNCEPHALASTRUM | -VQKSFVHA--EAFVSMMLRWLPOLVAILD-T-----SL--AHCVPPIFKIA          | 3430 |
| FUNCTIVORUM     | -SNRIFSKLI--REIP-TQTRWIPITLILLSD-----SQ--CDVPLKIMERL          | 3391 |
| HALBUM          | -AAKEFVEVT--KQIP-CMMLRWVDSMPFYL-T-----PO--GPYILPLIQEIA        | 3553 |
| DUPURPUREUM     | QVNKEFTEHV--SNIP-CMMLRWVDSMPFYL-L-----PO--GPLLPLILLDIA        | 3560 |
| PVIOLACUM       | EIITEFKELI--STIP-SMMLRWVDSMPFYL-L-----PO--GPLVPLILLEIA        | 3552 |
| AMPHIPOD        | -LIEVFOREI--STVP-VMLFLWLPOLLMLD-K-----TP--GRVLRPVIQVLA        | 3506 |
| SHRIMP          | -LLSSFKEEY--EKVP-IMMLLWLPOLLMLD-K-----VP--GVALQPVVERIA        | 3469 |
| MUDCRAB         | -LVATFKKEA--KKVP-VMMFLWLPOLLMLD-K-----LS--GEALQVVEKIA         | 3462 |
| TARDIGRADE      | -IEDAFQVGC--ADIP-AMMFIQWANOVLALD-K-----PE--GNAVHDLGRMA        | 3492 |
| HYDRA           | -TGELEFQVC--SOVP-CMPLGWIQIVSMID-M-----PI--VVHLKPIIDGIV        | 3368 |
| SALPINGOEA      | -SDHLQRVLASATTSVP-CMPLNWIQOMLAILD-A-----PE--APVVOQVILKRIA     | 3589 |
| SPIDER          | -CLQVFEKRV--SKRP-CMLTGWIDMVAILD-K-----PE--AKAVQCIIEKIA        | 3481 |
| LIMULUS         | -CSEDFVKKT--NEIP-SMMLRWVDSMPFYL-K-----PE--APPLHGIVERMA        | 3549 |
| SCORPION        | -TIPEFLAKS--KVVP-CMMLRWVDSMPFYL-K-----PE--ATAVQHIIEEIA        | 3504 |
| ROTIFFER        | ECLKFKVSS--EQIP-SMMLRWVDSMPFYL-K-----PO--AKAVQHIIEEIA         | 3461 |
| CLIONA          | NILDSFTQES--SALP-SMMLRWVDSMPFYL-R-----DV--APAVQPIITRYIA       | 3522 |
| OCTOPOUS        | -SIDIFINES--KKIP-CMMLRWVDSMPFYL-K-----PK--AYALHDIVYIA         | 3431 |
| CAPITELLA       | -TREVFRKKS--RDIP-AMMFGWVSIICAILD-K-----PE--SSAHEHILLNIA       | 3479 |
| LIMPET          | -TMPTFLKMVSENRFLP-LMMLLWVDSMPFYL-K-----TE--SPAQVILLQIA        | 3469 |
| SCALLOP         | -CMGTFVVKC--EEVP-CMMLRWVDSMPFYL-K-----PE--APAVQVILLKRIA       | 3536 |
| LINGULA         | -TMQGFINKV--SVIP-CMMLRWVDSMPFYL-K-----PE--APAVHNLIRIA         | 3492 |
| OYSTER          | -IRSTFVEKS--GOVP-CMMLRWVDSMPFYL-K-----PE--GSTVHHILLTEIA       | 3494 |
| SNAIL           | -TDMFLKKS--ETIP-SMMLRWVDSMPFYL-K-----HQ--AHAVRPIILRLA         | 3499 |
| SPONGE          | -TMDLMIKKS--STIP-CMMLRWVDSMPFYL-K-----PE--SRAVHDLIRIA         | 3544 |
| PRIAPULA        | -TLPLLTSKV--ESVP-CMMLRWVDSMPFYL-K-----RE--ARAVQVILLSTA        | 3538 |
| DANTIO          | ETLDLMVREV--VSPV-CMLLFGWISOMMLD-K-----DQ--ATAVQHIIEEIA        | 3517 |
| ESHARK          | ETLDLMKKEV--SSVP-CMMLRWVDSMPFYL-K-----KE--AVAVQHIIEEIA        | 3540 |
| BSHARK          | ETQDVMTFVG--STIP-CMMLRWVDSMPFYL-K-----KE--ACVQPIIEKIA         | 3530 |
| XENOPUS         | ETLDLMAREN--CTVP-CMMLRWVDSMPFYL-K-----KE--SIAVQHIIEEIA        | 3539 |
| STERLET         | ETLDLMKKEV--SSVP-CMMLRWVDSMPFYL-K-----EE--AVAVQHIIEEIA        | 3544 |
| GAR             | ETLDLMKEM--SSVP-CMMLRWVDSMPFYL-K-----KE--AVAVQHIIEEIA         | 3541 |
| HUMAN           | ETLSLMTKEI--SSVP-CMMLRWVDSMPFYL-K-----DQ--AVAVQHIIEEIA        | 3522 |
| PLATYPUS        | ETLDLMTQEI--SSIP-CMMLRWVDSMPFYL-K-----EE--AVAVQHIIEEIA        | 3529 |
| TASDEVIL        | ETLNLMIKEM--SSIP-CMMLRWVDSMPFYL-K-----EE--AVAVQHIIEEIA        | 3534 |
| COELACANTH      | ETLDLMAKMG--GSVP-CMMLRWVDSMPFYL-K-----KE--AVAVQHIIEEIA        | 3538 |
| CAECILIAN       | ETLDLMTREV--SSVP-CMMLRWVDSMPFYL-K-----KE--AVAVQHIIEEIA        | 3541 |
| CANARY          | ETLGLVTQEL--SSVP-CMMLRWVDSMPFYL-K-----DE--AVAVQHIIEEIA        | 3530 |
| OSTRICH         | ETLGLVTREL--SSVP-CMMLRWVDSMPFYL-K-----DE--AVAVQHIIEEIA        | 3500 |
| GECKO           | ETLGLMAQEI--SSVP-CMMLRWVDSMPFYL-K-----EE--ALAVQHIIEEIA        | 3540 |
| TURTLE          | ETLGLMAREI--SSVP-CMMLRWVDSMPFYL-K-----EE--AVAVQHIIEEIA        | 3539 |
| ALLIGATOR       | ETLSLMAQEI--STVP-CMMLRWVDSMPFYL-K-----DE--AVAVQHIIEEIA        | 3497 |
| APLYSIA         | -VVDVFNKVK--TEVP-SMMLRWVDSMPFYL-K-----PE--ADIVEPVLTKIA        | 3560 |
| TRICHOPLAX      | -TIDGFMRKS--SALP-SMMLRWVDSMPFYL-K-----PE--ARAVQHIIEEIA        | 3513 |
| SOFTCORAL       | GDIEAFKRS--SDVP-CMMLRWVDSMPFYL-K-----RE--SHAVQVILLQDIA        | 3536 |
| STONYCORAL      | -TLEAFVKA--ADVP-CMMLRWVDSMPFYL-K-----PE--GKAVHGVISEIA         | 3551 |
| SEA ANEMONE     | -TLDSFVKV--ETVP-CMMLRWVDSMPFYL-K-----KE--ARAVHGVIVTEIA        | 3512 |
| SEA CUCUR       | -TLKDFIKET--SSVP-CMMLRWVDSMPFYL-K-----PE--ADGVAGIVKRIA        | 3532 |
| LANCELET        | -TMDLFIKRV--SHVP-SMLCISWLGOMVAILD-K-----PE--AVAVHGVILTRIA     | 3556 |
| STARFISH        | -TMQLMIKEV--SDVP-CMMLRWVDSMPFYL-K-----PE--GPAVHGVILTRIA       | 3567 |
| SEA_URCHIN      | -TMQSLVKA--STIP-SMMLRWVDSMPFYL-K-----PE--SLAVQVILLKRIA        | 3558 |

Supplementary Figure 6 CLUSTAL OMEGA ALL PHYLA, EXPANDED

|                 |                                                             |      |
|-----------------|-------------------------------------------------------------|------|
| PARAMECIUM      | KKYPAQVYQNVYQTRKEFKP---DSEA---SKMFDKIQCIIPKNY-----AFI       | 3415 |
| TETRAHYMENA     | KNYPAQLIQNTIFSNQTTCTET---ALS---QEIYEAALHKEMPHYV-----NFM     | 3774 |
| STYLONCHEIA     | KKYPAALYVFKVVESENKVNVL---DSD---VQKQQLFOKLSKYYERTFRNLNAWA    | 3655 |
| APHANOMYCEsa    | KEYPAQLYDPRLSASIPDMAA-----NARFHRLAAL-----QDHTLNOQV          | 3220 |
| APHANOMYCEse    | AEYPAQLYDPRLSQESIIDIET-----NPRFHRLSAAL-----RDVHLDOQV        | 3145 |
| PYTHIUM         | TEYPAQLFDVKTICAGE---T-----KTDIRRLTTL-----SNPVMEKPV          | 3443 |
| PLASMOPARA      | ERYPAQLFDVMTCKSSRDI-F-----KVDLRRLEVL-----ANPVMEKPV          | 3407 |
| BREMIA          | EKYPALFDVMTCKSSLNK-F-----DVDLHRLEVL-----TNSVMEKPV           | 3390 |
| AEDDES          | TSYPMALYPAKMSLQRHQLRPD-----NVS-SPFANRMQL-----DIPKLDRFV      | 3454 |
| MIDGE           | TKYPAALYVPELSEFNHNKITT-----RMK-ENV-FKIRET-----SNPTIDMPF     | 3470 |
| BOMBUS          | ETYPALVITFRDMETNPALLN-----ET---STYEROLLYN---R-PEIDRFL       | 3311 |
| ANT             | ETYPALVITYLIERNSFLQ-----NE---EIQERKLLQD---KAEYERFL          | 3374 |
| WHIPWORM        | DDYPAQLIHPLSLAVSLKGSSTL-----CY---RKLMELEANL-H---GSEVVHEPT   | 3416 |
| TRICHINELLA     | DDYPAQLIHPLLMKSATGDVG-----ETDFYRLQLKL-R---KTKIVKEFI         | 3420 |
| BEEFLE          | TTYPAALMVARLSKENYKCEQR-----EA---KELIETLDEL-L---TDEGANKPL    | 3269 |
| BARNACLE        | EQYPAALVPLAASRADRGAVRP-----AE-MSACLEQAHQL-A---NCRLEPERLV    | 3333 |
| THRIP           | ETYPALVYPTNISKEKNSSSTV-----KLDVIKLDRLI-E---DSSFQIPLV        | 3354 |
| FLEA            | ESYPAQLHYPRLSILANXKCLAG-----SYA-EYCVAKLKQVL-M---KNSLIDRFI   | 3373 |
| WHITEFLY        | EKYPALVYPTNISKEKQAKVSS-----ST-QTIVDSLGLTL-D---CDYGTKEFL     | 3444 |
| TICK            | SDYPAALVAVRVSNEAYSFDIP-----ETK--DFILRLKQKM-D---KPLVSEFI     | 3384 |
| TERMITE         | ETYPALSLIAPQLSREKYNLESG-----HVSLKALVDQLASL-F---TDPVIDIPL    | 3446 |
| DAPHNIA         | KQHPVHVKIPGLRSSLGVEVL-----A---QSETRLESK-----LTDLTWEMFL      | 3164 |
| OSTREOCOCCUS    | SKYPAALVPHNMKKEI-----N---RDISERISAL-----ASSLHDFI            | 3387 |
| STENTOR         | TKYPAALVYPTNISKEKSLSGP---TK---VK---RKFSLKRLI-E-EKFDQDFLDMFI | 3089 |
| KLEBSORMIDIUM   | EEYPAALVPTREVPAPF---GD-----VA---REFTSNARLI-E---HNPLLDQVF    | 3715 |
| CLUBMOSS        | QHPYALVYPTNHSKDYQ---GT-----VG---LDRTRKLAATL-----KSPLEFGLV   | 3342 |
| MOSS            | KSYPAALVYPTNHSKDYQ---GA-----IG---RQRTQHLKILL-----RNPILLEGLV | 3499 |
| LIVERWORT       | KLYPAALVYPTNHSKDYQ---GP-----QG---RRKTRRLATL-----KSVLEGMV    | 3553 |
| LIGNANO         | DIYPAALVYPTNHSKDYQFETG---DSGA---RQAERLWRL-RR---LPLVEEPI     | 3846 |
| COPEPOD         | EDYPAALVYPTNHSKDYQFETG---DSGA---RQAERLWRL-RR---LPLVEEPI     | 3352 |
| GLOBOSUM        | TKYPAALVYPTNHSKDYQFETG---DSGA---RQAERLWRL-RR---LPLVEEPI     | 3335 |
| PALUSTRIS       | RDYPAALVYPTNHSKDYQFETG---DSGA---RQAERLWRL-RR---LPLVEEPI     | 3398 |
| NEOCALLIMASTIX  | LSYPAALVYPTNHSKDYQFETG---DSGA---RQAERLWRL-RR---LPLVEEPI     | 3501 |
| GLOMUS          | EKYPALVYPTNHSKDYQFETG---DSGA---RQAERLWRL-RR---LPLVEEPI      | 3517 |
| LOBOSPOR        | LQYPAALVYPTNHSKDYQFETG---DSGA---RQAERLWRL-RR---LPLVEEPI     | 3491 |
| SYNCEPHALASTRUM | KSYPAALVYPTNHSKDYQFETG---DSGA---RQAERLWRL-RR---LPLVEEPI     | 3479 |
| FUNCTIVORUM     | EKYPALVYPTNHSKDYQFETG---DSGA---RQAERLWRL-RR---LPLVEEPI      | 3436 |
| HALBUM          | SNYPAALVYPTNHSKDYQFETG---DSGA---RQAERLWRL-RR---LPLVEEPI     | 3595 |
| DPURPUREUM      | KYPAALVYPTNHSKDYQFETG---DSGA---RQAERLWRL-RR---LPLVEEPI      | 3602 |
| VIOLACEUM       | KYPAALVYPTNHSKDYQFETG---DSGA---RQAERLWRL-RR---LPLVEEPI      | 3594 |
| AMPHIPOD        | EEYPAALVYPTNHSKDYQFETG---DSGA---RQAERLWRL-RR---LPLVEEPI     | 3556 |
| SHRIMP          | AEYPAALVYPTNHSKDYQFETG---DSGA---RQAERLWRL-RR---LPLVEEPI     | 3518 |
| MUDCRAB         | LEYPAALVYPTNHSKDYQFETG---DSGA---RQAERLWRL-RR---LPLVEEPI     | 3511 |
| TARDIGRADE      | SEYPAALVYPTNHSKDYQFETG---DSGA---RQAERLWRL-RR---LPLVEEPI     | 3542 |
| HYDRA           | KSYPAALVYPTNHSKDYQFETG---DSGA---RQAERLWRL-RR---LPLVEEPI     | 3415 |
| SALPINGOECA     | SSYPAALVYPTNHSKDYQFETG---DSGA---RQAERLWRL-RR---LPLVEEPI     | 3637 |
| SPIDER          | LYYPAALVYPTNHSKDYQFETG---DSGA---RQAERLWRL-RR---LPLVEEPI     | 3531 |
| LIMULUS         | KEYPALVYPTNHSKDYQFETG---DSGA---RQAERLWRL-RR---LPLVEEPI      | 3599 |
| SCORPION        | TYYPALVYPTNHSKDYQFETG---DSGA---RQAERLWRL-RR---LPLVEEPI      | 3554 |
| ROTIFFER        | TEYPALVYPTNHSKDYQFETG---DSGA---RQAERLWRL-RR---LPLVEEPI      | 3510 |
| CIONA           | RDPALVYPTNHSKDYQFETG---DSGA---RQAERLWRL-RR---LPLVEEPI       | 3573 |
| OCTOPOUS        | CQYPAALVYPTNHSKDYQFETG---DSGA---RQAERLWRL-RR---LPLVEEPI     | 3483 |
| CAPITELLA       | DIYPAALVYPTNHSKDYQFETG---DSGA---RQAERLWRL-RR---LPLVEEPI     | 3529 |
| LIMPET          | TEYPAALVYPTNHSKDYQFETG---DSGA---RQAERLWRL-RR---LPLVEEPI     | 3521 |
| SCALLOP         | TMYPALVYPTNHSKDYQFETG---DSGA---RQAERLWRL-RR---LPLVEEPI      | 3588 |
| LINGULA         | REYPAALVYPTNHSKDYQFETG---DSGA---RQAERLWRL-RR---LPLVEEPI     | 3542 |
| OYSTER          | ETYPALVYPTNHSKDYQFETG---DSGA---RQAERLWRL-RR---LPLVEEPI      | 3542 |
| SNAIL           | TEYPAALVYPTNHSKDYQFETG---DSGA---RQAERLWRL-RR---LPLVEEPI     | 3551 |
| SPONGE          | DTYPAALVYPTNHSKDYQFETG---DSGA---RQAERLWRL-RR---LPLVEEPI     | 3591 |
| PRIAPIULA       | ESYPAALVYPTNHSKDYQFETG---DSGA---RQAERLWRL-RR---LPLVEEPI     | 3591 |
| DANTO           | ECYPAALVYPTNHSKDYQFETG---DSGA---RQAERLWRL-RR---LPLVEEPI     | 3567 |
| ESHARK          | DSYPAALVYPTNHSKDYQFETG---DSGA---RQAERLWRL-RR---LPLVEEPI     | 3590 |
| BSHARK          | DSYPAALVYPTNHSKDYQFETG---DSGA---RQAERLWRL-RR---LPLVEEPI     | 3580 |
| XENOPUS         | ENYPAALVYPTNHSKDYQFETG---DSGA---RQAERLWRL-RR---LPLVEEPI     | 3589 |
| STERLET         | EYYPALVYPTNHSKDYQFETG---DSGA---RQAERLWRL-RR---LPLVEEPI      | 3594 |
| GAR             | ESYPAALVYPTNHSKDYQFETG---DSGA---RQAERLWRL-RR---LPLVEEPI     | 3591 |
| HUMAN           | DNYPALVYPTNHSKDYQFETG---DSGA---RQAERLWRL-RR---LPLVEEPI      | 3572 |
| PLATYPUS        | DNYPALVYPTNHSKDYQFETG---DSGA---RQAERLWRL-RR---LPLVEEPI      | 3579 |
| TASDEVIL        | DNYPALVYPTNHSKDYQFETG---DSGA---RQAERLWRL-RR---LPLVEEPI      | 3584 |
| COELACANTH      | ESYPAALVYPTNHSKDYQFETG---DSGA---RQAERLWRL-RR---LPLVEEPI     | 3588 |
| CAECILIAN       | DAYPAALVYPTNHSKDYQFETG---DSGA---RQAERLWRL-RR---LPLVEEPI     | 3591 |
| CANARY          | NTYPAALVYPTNHSKDYQFETG---DSGA---RQAERLWRL-RR---LPLVEEPI     | 3580 |
| OSTRICH         | NTYPAALVYPTNHSKDYQFETG---DSGA---RQAERLWRL-RR---LPLVEEPI     | 3550 |
| GECKO           | NSYPAALVYPTNHSKDYQFETG---DSGA---RQAERLWRL-RR---LPLVEEPI     | 3590 |
| TURTLE          | NSYPAALVYPTNHSKDYQFETG---DSGA---RQAERLWRL-RR---LPLVEEPI     | 3589 |
| ALLIGATOR       | HNYPAALVYPTNHSKDYQFETG---DSGA---RQAERLWRL-RR---LPLVEEPI     | 3547 |
| APLYSIA         | AEYPAALVYPTNHSKDYQFETG---DSGA---RQAERLWRL-RR---LPLVEEPI     | 3609 |
| TRICHOPLAX      | DEYPAALVYPTNHSKDYQFETG---DSGA---RQAERLWRL-RR---LPLVEEPI     | 3562 |
| SOFTCORAL       | KHYPAALVYPTNHSKDYQFETG---DSGA---RQAERLWRL-RR---LPLVEEPI     | 3585 |
| STONYCORAL      | KRYPAALVYPTNHSKDYQFETG---DSGA---RQAERLWRL-RR---LPLVEEPI     | 3600 |
| SEA ANEMONE     | KNYPAALVYPTNHSKDYQFETG---DSGA---RQAERLWRL-RR---LPLVEEPI     | 3561 |
| SEACUCIE        | VEYPAALVYPTNHSKDYQFETG---DSGA---RQAERLWRL-RR---LPLVEEPI     | 3581 |
| LANCELET        | QYYPALVYPTNHSKDYQFETG---DSGA---RQAERLWRL-RR---LPLVEEPI      | 3607 |
| STARFISH        | YEPALVYPTNHSKDYQFETG---DSGA---RQAERLWRL-RR---LPLVEEPI       | 3617 |
| SEA_URCHIN      | KDYPAALVYPTNHSKDYQFETG---DSGA---RQAERLWRL-RR---LPLVEEPI     | 3608 |

Supplementary Figure 6 CLUSTAL OMEGA ALL PHYLA, EXPANDED

|                 |                                                                |      |
|-----------------|----------------------------------------------------------------|------|
| PARAMECIUM      | EALNQITHPHHRLLAYLNQIKDENSEDID-----                             | 3443 |
| TETRAHYMENA     | YHLNQITHPHHRLLVYLYLKSQFLSFQKIHNNTYS--SQKDYVVKLNKAVE-----       | 3822 |
| STYLNONCHIA     | EALDCLVYPEHRFKYWLQIINDIVSD-----                                | 3691 |
| APHANOMYCEsa    | AALLEGHHPERIRKKEALRYLSDVVD-----DKK--PKAQLASI-----              | 3256 |
| APHANOMYCEse    | AALHGLHHPERIRKKEALRYLSDVVE-----SKP--AKEASKI-----               | 3180 |
| PYTHIUM         | AALRLTHHPERIRKKEGLREVSKLLE-----SGK--AS-EAKAK-----              | 3478 |
| PLASMOPARA      | AALGLTHHPERIRKKEGLRKIANLLD-----ENR--TS-DARQT-----              | 3442 |
| BREMLIA         | AALRLTHHPERIRKKEGLKEISELVE-----DNR--TQ-DARHK-----              | 3425 |
| AEDES           | SELQVIVPSMKISKIITDLRMARC-----                                  | 3484 |
| MIDGE           | KCLQCLVVPKMIIDAHFKDFEFIE-----SKL--PEMNT-----                   | 3503 |
| BOMBUS          | TALHYVVKPELYLRHYLLELRKNLS-----LGT--ATAID--IF-----              | 3346 |
| ANT             | QALQYVQEKLYLKYLDNAIKDLS-----QK--MTAK--SL-----                  | 3409 |
| WHIPWORM        | KSLVLLSHPDVMLADAEPELECVTL-----GHA--HEMPLEKLGREM-----           | 3457 |
| TRICHINELLA     | DALNLLSHPDIAHIDELESIILNLS-----NNS-----NEARKEA-----             | 3455 |
| BEEBLE          | KALSGFIGPAALLIYYVRKIVKLLIA-----SSE--LGQAK-----                 | 3302 |
| BARNACLE        | AELGRIGVY-----                                                 | 3358 |
| THRIP           | KALSCLYPSSIILKDYTNKLTTEAMK-----SAP--INWLSLKEICDEFYSYHKESG----- | 3403 |
| FLA             | EALSCICLPEILLNALGKLTDKNY-----TDM--KN-----                      | 3403 |
| WHITEFLY        | KAMACLCLEDVVKLSFLGRKLTSL-----AND--GKCAV-----                   | 3477 |
| TICK            | EALELQFPDVAFKQWCESMREALN-----NQK--SVDVR-----                   | 3417 |
| TERMITE         | RAFSCLGQRKMLYHFVVEKLEQLLN-----AKR--P-----                      | 3475 |
| DAPHNIA         | KSDYLYKPPKAAARQLLNSEY-----                                     | 3192 |
| OSTREOCOCCUS    | RALELHFFPANRLKFWRQQLYLREC-----QH-----DKYSNCLN-----             | 3422 |
| STENTOR         | EALDLYTYPEHRKKSFLDLIKDSIM-----QN-----SSSYLTYL-----             | 3125 |
| KLEBSORMIDIUM   | TALSDLSHPHLKQWLSSEISRLQ-----KR-----DNQQAQEA-----               | 3750 |
| CLUBMOSS        | RALEDLTFPEKRLDGLCEVKSCLM-----SG-----NRTKARPT-----              | 3377 |
| MOSS            | RALEDLTFPQORLKDGLLQILNPLF-----TN-----DSERAQLV-----             | 3534 |
| LIVERWORT       | RGLEDLTFPEQRFKDLGSMKNCLI-----AG-----DKERALAV-----              | 3588 |
| LIGNANO         | AQMGEVCLPACTALDWLSSAKRSIG-----FPS-----QTERLREL-----            | 3879 |
| COPEPOD         | QGLGLVFPSSVALINDLLKSCKEQSN-----FPS--YWMQAKAKE-----             | 3390 |
| GLOBOSUM        | VELRRLLEDPAHIFKDLCERFESLIS-----SSLP--AKQASIKKA-----            | 3373 |
| PALUSTRIS       | FELQRLTEPMHIFKDWLERTDSLIR-----SGRP--DKEAAIVAA-----             | 3436 |
| NEOCALLIMASTIX  | MELQRLSEPIHIKYDYAEKIAEVLIS-----SKEKSSKIKENLKEY-----            | 3541 |
| GLOMUS          | TELHRLTDREIHFKNWINPVYLVK-----RNYSGVDTAEIKAS-----               | 3557 |
| LOBOSPOR        | FELRRLTNPDIHLKDWLEQTVLALFQ-----NKTR--NVEQIMAL-----             | 3528 |
| SYNCEPHALASTRUM | TELLRLTNPDQLKDFVDFLRSVAM-----NTEP--DKEYIQAM-----               | 3516 |
| FUNCTIVORUM     | SSLQKLTPEHRKQWGEILKSLK-----ASK--RSQQAIKST-----                 | 3473 |
| HALBUM          | SEFERLTHPEHRKYDMEVTRTKMMK-----STP--INTSEIQKL-----              | 3632 |
| DPURPUREUM      | TEFARLTHPEHRKDFMEEMKSLIK-----SPT--KDISAISIL-----               | 3639 |
| PVIOLACEUM      | QEFRLTHPEHRKDYMEEMKALLK-----MAP--INSQLICKL-----                | 3631 |
| AMPHIPOD        | EAITLTVTEPFGDVVDRNAERLPS-----SQ--SKANKLKYI-----                | 3592 |
| SHRIMP          | SAMSLMVVPSIACKDAIQNLQEKD-----KQ--KMEEGLSEI-----                | 3554 |
| MUDCRAB         | TAMSLIVVPENTLKKSKFKILLKLN-----KE--DIEVALNNL-----               | 3547 |
| TARDIGRADE      | RHLTRLCEPHTFKDFDKRADYLLK-----YK--KKDQKQE-----                  | 3577 |
| HYDRA           | KALYQLSDPVSLLKDFLEQIRGVYS-----N--GSKDEIRCK-----                | 3450 |
| SALPINGOECA     | TELKCLTNPVMAYMDWLEEQDAIK-----K--RDQALLTA-----                  | 3672 |
| SPIDER          | TALDHLVSPSVIFKDYVNELVQSVS-----AK--TSADKVKEI-----               | 3567 |
| LIMULUS         | KALGHLGVPPYGVFKETCRNITSLKK-----FK--ENSEKQKE-----               | 3635 |
| SCORPION        | NALDLSVPELLKRYFKLILQMKK-----DK--GDKNEIVKL-----                 | 3590 |
| ROTIFFER        | TALDHLNPKFLKQWLDMDNNLK-----                                    | 3543 |
| CIONA           | RQLRRRICHRSIAEKDWKEDFTNLFCSS-----KET--SRMKHIVEN-----           | 3611 |
| OCTOPLUS        | SSLESFAEPLNFKDFKFNALQLYS-----KTN--PKKQEVIEL-----               | 3520 |
| CAPITELLA       | FSLEMMHEPAVILKDWIMDMKNAKG-----PGGSSQSLSMAYVKER-----            | 3570 |
| LIMPET          | SALDQFGQPEMLFKDWTDDIKKMLQ-----SKN--RNKSKIMEK-----              | 3558 |
| SCALLOP         | CALEQFGQPDQIFKDWGNDMLRMLK-----KKK--QDKVKIKEL-----              | 3625 |
| LINGULA         | NALEQFGQPNALFKDWGEMAKLLH-----VKQ--RNTDAVQR-----                | 3579 |
| OYSTER          | SALEHMSQPDQIFKDWFDTRLKFM-----KNK--PDKAMKEE-----                | 3579 |
| SNAIL           | SALEQFSQPVQMFQDWSRDTIKLLE-----KR--P-AAEIKKK-----               | 3586 |
| SPONGE          | AALQOLNSPELAWKDYDNLKPLV-----GSVTVPK--RDKNAIKRV-----            | 3632 |
| PRIAPULA        | ASLEQLSSPHMLKDFVADARPLLM-----T--LRADFPAR-----                  | 3625 |
| DANTIO          | DALQOLSNPEMLFKDWDEVKNLQD-----KPN--LDKMKMLQ-----                | 3604 |
| ESHARK          | HSLEQLSNPMLFKDWVDFRSKLE-----KKE--ANKQKLN-----                  | 3626 |
| BHARK           | HSLEQFSNDLLKDWMANDFKTELE-----KKV--KDKKLLKNN-----               | 3617 |
| XENOPUS         | RALEQLSNPPMIFKDWVEDVSNELS-----KPN--VNNKNIKEL-----              | 3626 |
| STERLET         | DALQOLSNPEMLFKDWVEDVKKLE-----KPK--TDKLLKNN-----                | 3631 |
| GAR             | EALQOLSNPEMLFKDWLEDARNTLS-----KPK--TDKDAKMM-----               | 3628 |
| HUMAN           | NALDQLSNPELLFKDWSNDVRAELA-----KTP--VNNKNIKEM-----              | 3609 |
| PLATYPUS        | QALEQLSNPEMLFKDWVEDIKIELT-----KTP--INKNLKRMM-----              | 3616 |
| TASDEVIL        | NALEQLSNPELLFKDWVDDVRGILLM-----QTP--VNNKLEKMM-----             | 3621 |
| COELACANTH      | HALEQLTNSDMIKDWVDDVRNELD-----KPQ--RNKANLKRMM-----              | 3625 |
| CAECILIAN       | QSLQOLSNPDMIKDWIEDMKNELA-----KSQ--RNKNNIKLL-----               | 3628 |
| CANARY          | HSLEQLSNPVMIFKDWAEDEVNELS-----KPQ--RNKKLKEM-----               | 3617 |
| OSTRICH         | HSLEQLSNPMLFKDWTEDEVRELIV-----KTQ--RNKNLQDM-----               | 3587 |
| GECKO           | QALEQLSNPMLFKDWTDHMKELG-----KTK--RNKNLKL-----                  | 3627 |
| TURTLE          | HALEQLSNPVMIFKDWVEDVKNELG-----KTQ--RNKNLKRMM-----              | 3626 |
| ALLIGATOR       | QALEQLSNPEMLFKDWVDAVRNELG-----KAQ--KNKAKLKEM-----              | 3584 |
| APLYSIA         | SALEQFEEDIVFKDWGKEMRLLN-----AQK--RDGKIKKV-----                 | 3646 |
| TRICHOPLAX      | RALEQLSQPDVLFKDWVEVKGLK-----KSG--SIAESIRIC-----                | 3599 |
| SOFTCORAL       | QALEQLTNPENVFKDWMEVVKVLLS-----TK--GNAVKIRE-----                | 3621 |
| STONYCORAL      | AALQMLTNPENVFRDWCCEGPMKQLLE-----DQIKR--NDSQAVKQC-----          | 3640 |
| SEA ANEMONE     | AALQOLHNPMAFKDWCDGGEIKQLL-----QT--KNKAIKEA-----                | 3597 |
| SEACUCIE        | RALEQLNHPGVLFKDWADDELKPL-----QAEK--RDNVKIKKA-----              | 3619 |
| LANCELET        | GGLEQLSHEDQLFKDWGDADLKRLLKVDPKKRTK-----EDKVTIKRL-----          | 3651 |
| STARFISH        | CALEQLNPEFVFKDWADVMKPLL-----NVAK--RDNKNIRQA-----               | 3655 |
| SEA_URCHIN      | LALQRLTHGFIKDWISVIN-SKM-----NSKE--RDHPAIKQE-----               | 3645 |

Supplementary Figure 6 CLUSTAL OMEGA ALL PHYLA, EXPANDED

|                 |                                                           |      |
|-----------------|-----------------------------------------------------------|------|
| PARAMECIUM      | ----TVIDKI----QEDF-FS-----KREDFYGSYNLA---                 | 3467 |
| TETRAHYMENA     | ---EVQKIDRLRLKETEEDL-FQH-----NINADHMGSYNIK---             | 3855 |
| STYLONCHEIA     | ---LKDI--IMMAYDLTC-TQK-----DLGQVGSYNRK---                 | 3721 |
| APHANOMYCESa    | -----VSTTLSAV-FDDRTRV-----LGNQVQAYNRQ---                  | 3282 |
| APHANOMYCESa    | -----LAATISHV-LDESSKI-----LGNQIGVYNRQ---                  | 3206 |
| PYTHIUM         | -----MAHVQDC-FASEHPL-----LGGQIGHYNRD---                   | 3504 |
| PLASMOPARA      | -----VELLRDC-FSPQRQL-----LGAQIGRYNRE---                   | 3468 |
| BREMIA          | -----VTRLWKDC-FSLDRPL-----LGGQIGRYNRE---                  | 3451 |
| AEDES           | ---YRKLVHDLANEA---F-----PEISPDLGREHQKLP---                | 3513 |
| MIDGE           | ---KMFQDAVKVYKVV---F-----ENNENLKGTSFSIHE---               | 3534 |
| BOMBUS          | LKRVYPNLREN---K-H---D-----PKPGLIFNK-LASYKN---             | 3375 |
| ANT             | LEKVYPNSHTHAEB---K---N-----PQGOIFGKEIASYEB---             | 3442 |
| WHIPWORM        | IAKISARLLSDYK---P-----DALGTWVK---                         | 3480 |
| TRICHEINELLA    | IAKVYSPVTFADIR---R-----DFLGSFWKCY---                      | 3480 |
| BEEBLE          | ---IVHDFVLKEMPI-KADS-----RSDLLQGNMFKSITK---               | 3334 |
| BARNAACLE       | ---KAAGALADWGLAVAL-SDPP-----SEADRQLRLCGDNGE---            | 3394 |
| THRIP           | GPSQCAGNFFHSYKHKHEH-----IPALFDELCAASE---                  | 3436 |
| FLA             | -----LKRML-F-Q-----QNLHPLRGAFAEAMTK---                    | 3426 |
| WHITTEFLY       | ---CIGAVLEIFDEAEI---K-----GNIYSLIGDLKKDVIE---             | 3508 |
| TICK            | ---KLYADGVRLFGQGRDL-A-L-----SSGGIVHRHFSDVVK---            | 3453 |
| TERMITE         | ---NCDSLHHMYDTMMKEL-F-P-----SSYGIHGALFKDIE---             | 3509 |
| DAPHNIA         | -----FQSKYLANL---PPPT-----ARSAGHVHYS---                   | 3215 |
| OSTREOCOCCUS    | -----LEVMLLDL-AVV-----DDPLLGPINRK---                      | 3444 |
| STENTOR         | -----FNEHEKSI-IG-----TKMPGVYNNK---                        | 3145 |
| KLEBSORMIDIUM   | -----FREMTRDC-LDARLAA-----AERQAGODLLA---                  | 3777 |
| CLUBMOSS        | -----FRAVPADC-LDVEAMRN-----ETROAGEYNNK---                 | 3404 |
| MOSS            | -----FNEIYQDC-LDTQSLKD-----PVRQTGEYNLK---                 | 3561 |
| LIVERWORT       | -----FAEIIYEDC-LNVNVMRK-----SLRGAAGEYNLK---               | 3615 |
| LIGNANO         | -----HAEAIDQLFFDPD-----GPOAGSHGRLRRE---                   | 3905 |
| COPEPOD         | -----YKDFKVRV-LSK-----DPDVESAFKT---                       | 3411 |
| GLOBOSUM        | -----YEEFKLIC-LET-----K-KNGDIGRK---                       | 3393 |
| PALUSTRIS       | -----FEEMAAYC-LTQ-----NSDMGEVGRA---                       | 3457 |
| NEOCALLIMASTIX  | -----SNVIEHYL-IEPP-----S-NKAGTIYMK---                     | 3563 |
| GLOMUS          | -----FQKMSSFL-LKP-----NPYHGIFAKE---                       | 3578 |
| LOBOSPOR        | -----YQDLHRLV-LD-V-----GNPKLGSIAKA---                     | 3550 |
| SYNCEPHALASTRUM | -----YRQFSELL-LSPT-----SSNRYGVIKPA---                     | 3539 |
| FUNCTIVORUM     | -----FAEIIYALD-LDS-----TDETIGSYNNK---                     | 3495 |
| HALBUM          | -----GVEIYNDC-FNP-----HTVRGDYNLK---                       | 3653 |
| DPURPUREUM      | -----NSEIYDSD-FNP-----KTVSGDYNIK---                       | 3660 |
| PVIOLACEUM      | -----GTEIYNDC-FNQ-----KTVKGEYNLK---                       | 3652 |
| AMPHIPOD        | -----KEQFFANV-TSLALQQ-----QETORGAQYYL---                  | 3618 |
| SHRIMP          | -----VSEFLK-V-QNRSSKG-----NAEEKGEAYTRQDR---               | 3582 |
| MUDCRAB         | -----VADHLK-V-NNRSTRG-----MAGEKGEVFCVKVK---               | 3575 |
| TARDIGRADE      | -----YAEINQCV-FRQG-----SSTQLAATWKE---                     | 3600 |
| HYDRA           | -----YKSINDLL-LSANSRQS-----SESLKGRVPIE---                 | 3478 |
| SALPINGOBECA    | -----FKHLKSEL-LVTSSTTA-----SDREVGSAWKA---                 | 3699 |
| SPIDER          | -----FTRINDKL-FNPNAAEK-----NRRVTVGPLHKK---                | 3595 |
| LIMULUS         | -----FQEMWQDI-FDAGNQDN-----S-GPGKGLVFIN---                | 3662 |
| SCORPION        | -----YKALCHEL-FNINPRDK-----M-KERK-LHLK---                 | 3615 |
| ROTIFFER        | -----FKOLNNL-IDLE-----GKIDFCGRMTD---                      | 3567 |
| CLIONA          | -----YQNMNFDF-FQCIPPASEE-SSLY-----GDSPTSISVGLIWTK---      | 3649 |
| OCTOPUS         | -----YKDMCSSL-FEE-----NVSPYQK---                          | 3539 |
| CAPITELLA       | -----YQELYKEL-LCIESEDGS-----LYSDSADCSMGPYRSD---           | 3603 |
| LIMPET          | -----YKEIYNML-IEYKETQDTSSTQL-SY-----MTQTTNVGMGEYRKK---    | 3597 |
| SCALLOP         | -----YQEMYRQL-LEPSQGT-LSSQOD-DVFSTQTSQSIIEMGQYLRK---      | 3667 |
| LINGULA         | -----YTQMYSSL-MMTQORQA---GGVSQ-DI-----FDTEPDSVEIGQYRQK--- | 3617 |
| OYSTER          | -----YQIMYKVV-LEFTETVGRGASQR-SQ-----TEETLSMVDKGYPKK---    | 3619 |
| SNAIL           | -----YKEIYDML-LEMPHKGEQSQTQ-A---QQTSPFGAVSMGEFHRR---      | 3624 |
| SPONGE          | -----WEQMYSQL-LETRSGLGD---KSLYG-----GSPSLQKARQKT---       | 3667 |
| PRIAPULA        | -----FRKIYASL-FDTTRRSQE-----EPGGRGRYWSV---                | 3653 |
| DANTO           | -----Y-MTELL-GDA-----KSPRFGSYRKK---                       | 3624 |
| ESHARK          | -----YSEMYSNL-AVA-----GAPGIGAFRRR---                      | 3648 |
| BSHARK          | -----YDEMYSNL-ASL-----QFPGIGAFRTR---                      | 3639 |
| XENOPUS         | -----YKEMYTNL-GNP-----KDFMGAFRRR---                       | 3648 |
| STERLET         | -----YEEMYSAL-GNP-----RCQIGAFRKK---                       | 3653 |
| GAR             | -----YEEIISVL-GNA-----KAAGIGFRKK---                       | 3650 |
| HUMAN           | -----YERMYAAL-GDP-----KAPGLGAFRRK---                      | 3631 |
| PLATYPUS        | -----YEGMYKTL-GNL-----KAPGLGAFRRK---                      | 3638 |
| TASDEVIL        | -----YEEMYAIL-GTL-----EVPGIGAFRKK---                      | 3643 |
| COELACANTH      | -----YEEMYANL-GNL-----RAPGLGSFRSN---                      | 3647 |
| CAECILIAN       | -----YEEMYMNL-GNL-----KAPGIGEFRRR---                      | 3650 |
| CANARY          | -----YERMYKNL-GNL-----ESPLGMRRKR---                       | 3639 |
| OSTRICH         | -----YERMYRNL-GNL-----EAPGLGLRRR---                       | 3609 |
| GECKO           | -----YDGMYNL-GNV-----HASGLGLFRKR---                       | 3649 |
| TURTLE          | -----YEGMYRNL-GDL-----QAPGLGLFRKR---                      | 3648 |
| ALLIGATOR       | -----YEGMYGNL-GNL-----QASGLGLFRRR---                      | 3606 |
| APLYSIA         | -----YLELYQSL-LEOPASGRQDSGGS---QASVSSVTSVPMGEVRRG---      | 3687 |
| TRICHOPLAX      | -----YQKLRDGL-LVDASNESEAA---SSLTSGELIEFGSHKRR---          | 3635 |
| SOFTCORAL       | -----YGEMSKKL-LNVKKRGT-----NSDGLFEGSIRRK---               | 3650 |
| STONYCORAL      | -----FGAMFQLL-MDCRKRKSGS-----QTRGTESGPFRTK---             | 3672 |
| SEA ANEMONE     | -----FRSIYQQL-FDSSVNR-----ATDSSQPAEEMGPFRRK---            | 3630 |
| SEACUKE         | -----YSQMEDKL-LNFSWSYEGHD-----LCGIVANFRTS---              | 3650 |
| LANCELET        | -----YDEMYDSL-LDFRSASQDSMSLFGSQSDLESQVGPFRRR---           | 3695 |
| STARFISH        | -----CHEIYMNL-INHRSTVTDGAG---SSQDSQSSPSVGFGNFRRR---       | 3695 |
| SEA_URCHIN      | -----YQQLYQQL-FES---GGR---QGGPSSSSQTVPEGPPYWK---          | 3678 |

Supplementary Figure 6 CLUSTAL OMEGA ALL PHYLA, EXPANDED

|                  |                                                             |      |
|------------------|-------------------------------------------------------------|------|
| PARAMECIUM       | FIQKKKQNLN---QILKNKADS-----HTINQFA-QEISE---E-----AK         | 3501 |
| TETRAHYMENA      | FSKDHISEFK---KLVKKPTDITKG-DDQD-KREAYDFI-KKFRDK--VN-----TK   | 3899 |
| STYLONCHEIA      | FAELWDKVF---KEFGS--NLNRV-DKMS-NSEIKSV-QNLNKNLQNS-----IG     | 3765 |
| APHANOMYCEsa     | WMAQHRKHIE---AMLG--KDV---TKAA-LQSARGWL-SQTFQVMPG-----KY     | 3322 |
| APHANOMYCEse     | WITKNRQIE---SMLG--KHGELA-NKST-LQTAAGWL-SQSFOVMPG-----KY     | 3249 |
| PYTHIUM          | WAKRAKRDVE---KMLG--RDGSNV-TAKS-VNAAREWI-MNHFSVMPG-----KF    | 3547 |
| PLASMOPARA       | WSRVAKRDEVE---KIMG--KDGLKM-TAKT-VSAAREWI-MNHFSVTPG-----RY   | 3511 |
| BREMIA           | WSRKAARDVE---KIMG--KDGSKM-TAKS-IKYAREWI-MKHFGVTPG-----TY    | 3494 |
| AEDIS            | LKPEWL-----KLLDF-----DFNQTSEEIHQ-HL--NNLKEKV-----TR         | 3545 |
| MIDGE            | FKAKIR-----EVPNM-----KWNQKTKSFLHEL--RFQIEKL-----GK          | 3567 |
| BOMBUS           | MIKELN-----KRTBEIK--LCVDRITERIKS--LI-----                   | 3404 |
| ANT              | KIRALAH-----EDLDAAR--KEILKKEPLINES--LWK-HMN-----KN          | 3477 |
| WHIPWORM         | ---YKPT---LBQLFNEQITSLD-ATWLEVTKRSMTEV--IEEAK-----RM        | 3518 |
| TRICHINELLA      | FKKYLK---MQEIFSVLDCAPD-NKAAENYLRLCSSP--LSELR-----TF         | 3521 |
| BEEBLE           | YEKDLN---IGRLLTKPSETPNVLKQLQKIN---T--NLGNTLQ-----DR         | 3373 |
| BARNACLE         | RITTRSA-----PKAV-----D--LIK-----KR                          | 3411 |
| THRIP            | RNTTVAS-----EILNK-V-KKT-----LEKVKE-----LD                   | 3460 |
| FLAFA            | FENLFST-----YM-----EKPSPEL--LMEIKML-----LK                  | 3451 |
| WHITEFLY         | LKKYVDR-----GKLKEAL-KQTENIMRAITPC--YHK-----                 | 3538 |
| TICK             | KKVTDAP-----GIEGSKL-VKM-DAKKPGSEC--QVI-----LK               | 3484 |
| TERMITE          | YRKR--L-----EKAESNI-KCG-NKKVLKDIC--FIKEKLEK-----YI          | 3542 |
| DAPHNIA          | FSQAFYKGFQ---ETLD--Q-G---RMK-----SLLNSLEFF-----K            | 3244 |
| OSTREOCOCCLUS    | FVEIASPILN---SVYK---SALK-EKMS-VSETLKKVVEVQLDE--WRKEPH-----  | 3487 |
| STENTOR          | FAYDMEPTLS---GFG--RQFTNI-NRMS-TTELLQAT-ETLAKKLAN-----       | 3186 |
| CLIBSORMIDIUM    | YARNPESKIV---SALG--KDGVKL-ARMS-ATEYKNAI--SSVSHVLDLDR-----ED | 3820 |
| CLUMBOSS         | FARDYSKPVV---KALG--EDGSKL-LQMD-EKKPATAI-AGVLTSLQK-----AI    | 3447 |
| MOSS             | FARDWASLIV---KELG--LNGSKL-RSMD-AKQFSSVI--SGLFEKLSK-----ND   | 3604 |
| LIVERWORT        | FGRDWSKRVI---KALG--ENGSKL-VKMD-EKKFMSAV-GDLLANLQK-----AM    | 3658 |
| LIGNANO          | FAARHRREFL---AALP---TADRL-VGIRSEAEQLRAV-GKLWKRVRD-----ER    | 3948 |
| COPEPOD          | LEKTFGAKLD---KAFA---GSKL-LQDL---KEIY-KEADA-----KF           | 3444 |
| GLOBOSUM         | PAEKHTAKIA---NICA---NGEKI-DNNK-LKE-----LVS--YRDK-LGS--E     | 3430 |
| PALUSTRIS        | PASKHAAKLF---KILG--KDGSKL-TNIK-LSEW-----KEIQK--YHQPIHG--K   | 3499 |
| NEOCALLIMASTIX   | FSKKYKNEK---KVFA--LSNLV---KAK-PKTYMNI-F-KKQLTT--FRSD---KEF  | 3606 |
| GLOMUS           | FVNRHSEYLF---DICG--RDGSIL-ARMS-PNDF-----KSKIYD--YIYKNIKRO-D | 3622 |
| LOBOSPOR         | FAKYGSKME---SLCG--KTGQKL-ATIS-NRDF-----NSHILK--PCRNEILSKDA  | 3595 |
| SYMBIOPHALASTRUM | FATKHAQSLR---GLFG--KDGSKL-LMT-QRDL---KRI-QD---YQR-----NVK   | 3578 |
| FUNGIVORUM       | FATTWSRKYV---SAFG--KDGANL-CKMT-AEDLQSHL-SEPLEPMNR-----DL    | 3538 |
| HALBUM           | PAKEWHDHYS---QHSF--KDGSKL-AKMD-VKKLVELV-ADMSGKMAK-----TM    | 3696 |
| DPURPUREUM       | PAKEWEDKYL---KYYG--KDITIL-SRMD-QKKPLEHF-AEMSEMNMK-----NM    | 3703 |
| PVIOLACEUM       | FAKEWEAKFI---QHFQ--ADGSKT-LKMD-VKKLVEVV-GEMSANMNM-----AM    | 3695 |
| AMPHIPOD         | ILDKLKLVPK---KYFG--DKGSEM-KSLK-CTEIDRCI-TELLSC-----         | 3656 |
| SHRIMP           | AKKQMAEAF---KAFG--ENLKA-KSL-IRDQREL-GSMGRVLQ-----SP         | 3625 |
| MUDCRAB          | LKRDVNVALT---KEFG--GKMEEF-KRMP-VVEIKKRL-NSIRTVVNO-----      | 3616 |
| TARDIGRADE       | FVEKPKQDFV---YLFQ--ENGQKI-ANLS-SSQWAKTK-EKWENDPK--EYKG--KA  | 3646 |
| HYDRA            | FAKKFSSYVE---SLFG--KDGSKL-LKMS-LNEFQEAT-QQINEKLE-----       | 3519 |
| SALPINGOCEA      | AAKKASRNFM---DQFG--TDGSKL-LRMD-AKAYAKVK-KVLKAKLRE-----      | 3740 |
| SPIDER           | FSEEPKDFL---ATCG--KDGCKL-MKEK-ESKVALKALSDLVAEAK-----        | 3637 |
| LIMULUS          | FEKKFKKVV---DLCG--QNGNRI-LSMS--TRKFSKES-NRLVEEMKKT-----     | 3704 |
| SCORPION         | VAKVCGSVF---SFG--KGNKLI-TSMP-LKEASVKY-ETLLKTTM-----         | 3657 |
| ROTTIFER         | FSNFIKPLFM---KQFG--EQFRLI-POLS-ELEIKNKL-QNICSVNEF-----      | 3609 |
| CIONA            | FSKNYKAKVE---RTFG--QGTGDKL-SRMD-LKQCRGEI-NNLYSDIEK-----     | 3691 |
| OCTOPUS          | PTENFHSLFV---NSFG--KDGSKI-NKMN-KQELQKQI-LVVKEKLE-----       | 3579 |
| CAPITELLA        | FVKQFISQFD---EYFG--KMGSKI-PGLT-FMKVLSWL-SDKSE-----K--V--KK  | 3644 |
| LIMPET           | FADTFKDFD---IAFG--KNGEKL-ASMS-IK-----                       | 3625 |
| SCALLOP          | FSARFKDID---KYFG--EDGRKL-VGML-LKDFGIF-RKLGEDMDHEVRG--I--PK  | 3715 |
| LINGULA          | PAKAYCKDL---SAFG--KDGSKI-MTMS-EAADGIF-KKMDLASKGT-----RG     | 3661 |
| OYSTER           | FAERFKDID---SCFG--KNGEKL-LDMS-FSKLAGAY-KKVKMDMDFE-----VK    | 3663 |
| SNAIL            | FAEVFKNEFD---NHFG--VDGSKL-VTMT-AKEFSGIL-RNLQ---AQFE-----KH  | 3666 |
| SPONGE           | FAQAYAKNIE---DKFG--KGGAKI-ISMS-GTQLASAF-NEVYNKMRSE-----     | 3709 |
| PRIAPULA         | FTRTWAREVE---EKCG--RDGSKL-LAMA-AADANQVL-SALGEMK-----        | 3693 |
| DANIO            | FIQKFSKEVE---KLLG--AGGSKL-YERRKDKDFLQV-DRMVQSM-----         | 3664 |
| ESHARK           | FVTFKPKKID---QHFQ--KDGSKL-LNMM-LKAPNVAV-QQIMET-----         | 3686 |
| BSHARK           | YVQVFKKAFD---QYFG--KEGSKL-LDMN-IKIPDEMT-KKILETV-----C       | 3679 |
| XENOPUS          | FCEKYTKDFD---KAFG--PEGSKL-LNIK-CDGPNKTV-GPLITKM-----        | 3687 |
| STERLET          | FAQHSKFEFD---KTFG--KGGAKL-FDMK-HDAFRKAS-DSLWGSISEE-----     | 3695 |
| GAR              | FVETYAKRIEIVKELG--KDGSKL-WDKR-KD-----EKFWKLTTS-----I--RS    | 3692 |
| HUMAN            | FIQTFGKEFD---KHFG--KGGSKL-LRML-LSDFNIDT-NMLLLK-----         | 3670 |
| PLATYPUS         | FIQAFGNEFD---HHFG--KGGSKL-LQMK-LSDFTSIT-NSLSK-----          | 3677 |
| TASDEVIL         | FIQTYGKEFD---RHFG--KRGSKL-LVMK-LSDFNIT-TLLANK-----          | 3682 |
| COELACANTH       | FVKAYGKEPE---RVYQ--KRGSKL-LDMK-SSDFPKVS-DQLLTS-----         | 3686 |
| CAECILIAN        | FVQAHAKDL---THFG--KGGSKL-VDMK-EDAFKTA-YSLFNNM-----          | 3689 |
| CANARY           | FIQAFGKDL---HHFG--RGGSEL-LMMK-TSDFDAIA-NSLSK-----           | 3678 |
| OSTRICH          | FIQAFGKDFD---HQFG--KRGSKL-LMMK-ASDFDAIT-SALLSK-----         | 3648 |
| GECKO            | FIEKFGKEFD---SHFG--KRGSKL-LDMK-ASDFDAIA-DSLLK-----          | 3688 |
| TURTLE           | FVTFGKDFD---SHFG--KRGSKL-LDMK-ADDPNRIA-FSLLSK-----          | 3687 |
| ALLIGATOR        | FIQAYGKEFD---TQFG--KGGSKL-LDMK-DNEPIKIV-NALLAK-----         | 3645 |
| APLYSIA          | FATSCAEPD---KAFG--KNGDKL-TSMN-VKEPQSMV-RKINEVINKH-----K     | 3730 |
| TRICHOPLAX       | FIQHFQKVE---QYFG--KDGSKL-QSMK-ASDFEKIA-SRLIQEIS-----        | 3675 |
| SOFTCORAL        | FAQEFSGNVV---KVCG--EDGSKI-IDMS-IKAFESAM-KTINEK-----         | 3688 |
| STONYCORAL       | FAQEFANEVQ---RIFG--KEGEKL-VGVK-MTDFSKWC-RDIQQKMXF-----      | 3714 |
| SEA ANEMONE      | FSKEHASRFE---NIFG--KDGSKL-VNMS-LRTAKLK-----Q                | 3662 |
| SEACUKE          | FARKWLKVE---KVFG--KGEKEL-LKAI-TNDFTTVV-A-----NMYAEMNP--R-   | 3692 |
| LANCELET         | FAQQFAKECE---KMPG--KDGSKI-LDMK-EKEFMKLE-SGLQNMGMDFYKAFP--RE | 3745 |
| STARFISH         | FAQEWQKFE---AAFQ--KDGTKV-IDMQ-LRTFSEHY-GKL-----YKEMAA--K-   | 3737 |
| SEA URCHIN       | FGREWQKRFD---SSFG--QDGSKL-AAMD-YKTSKLR-QDI-----CARMTP-----  | 3719 |

Supplementary Figure 6 CLUSTAL OMEGA ALL PHYLA, EXPANDED

|                 |                                                        |      |
|-----------------|--------------------------------------------------------|------|
| PARAMECIUM      | QIQVKNQOMIHDMSRPFQNYNEESIDQ-----VKGQTELLIPILS          | 3543 |
| TETRAHYMENA     | DL-KSGYDKLSNFSSLQNF-----Q-----AD--HIIELPQOYT           | 3932 |
| STYLYONCHIA     | NL-GQGYEKLSTFSEWLDLSDPNDFYN-----PS--EYIELPQOYE         | 3804 |
| APHANOMYCEsa    | GIDRHWKAKLADFSDFLAQLDPVK-----MRIELPQOYTK               | 3357 |
| APHANOMYCEse    | GIDRWKAKLADFSDFLQMLDPVK-----TRIELPQOYIK                | 3284 |
| PYTHIUM         | GITKDMKARLADFADWLEDFDHIK-----CRLELPQOYTS               | 3582 |
| PLASMOPARA      | GITKDMKAHLGDFAEWLEQFDHSS-----CILELPQOYTS               | 3546 |
| BREMIA          | GITRDMKAHLGDFAEWLEQFDHSN-----CSLELPQOYTS               | 3529 |
| AEDIS           | LVPRQTFLELNKYSPLAGLHFSEER-E-----EMLELPQOYNI            | 3582 |
| MIDGE           | HRRGTEPLEVHKLCNFAEYKWCGE-N-----DFLELPQOYVQ             | 3604 |
| BOMBUS          | -KDDNKNRLQDYSPFLCNFP--E-----ROVELPQOYTS                | 3436 |
| ANT             | VITYNKLSKLDKDYSPLHKVGSSS-----DGIELPQOYTS               | 3513 |
| WHIPWORM        | PDISRCDALCDYSLDMFRSSTDS-G-----IHLIELPQOYTS             | 3555 |
| TRICHIANELLA    | YIPECCPNLNKEYSPLAGRPHPM-D-----VFLIELPQOYSG             | 3558 |
| BEEFLE          | RENQRNSRLKEYCPLANFSASKN-N-----LELELPQOYDG              | 3410 |
| BARNACLE        | LAERPASRLGDFSGWLASFDQVNS-Q-----ERLELPQOYTG             | 3448 |
| THRIP           | SKNIKHYSKLDFSPWLAEPSSSK-N-----ICILELPQOYTG             | 3497 |
| FLIEA           | SLSNHRPKTLRDLCPWLAEPDQDS--VALELPQOYQG                  | 3487 |
| WHITEFLY        | QPSRDARISLKSYSPLASFLSTAY-S-----STTEMPQOYSG             | 3575 |
| TICK            | SYKSLPTALKDLSPWLSRFSALDR-D-----NKILELPQOYTG            | 3521 |
| TERMITE         | IQDIKPPVQLKDYSPWLESEYQGGKCF-----LELELPQOYTG            | 3580 |
| DAPHNIA         | KKTFPGQKSLRDYSPWLANRIDDGIV-----NILELPQOYKQ             | 3282 |
| OSTREOCOCCUS    | GIESARLRLSDPSSWELHSS--E-----QVLEVPQOYDM                | 3523 |
| STENTOR         | PSLPGREKLTDFSPWLAQGLDITP-----GLDLELPQOYTG              | 3224 |
| KLEBSORIDIUM    | --LAHGKQLSRFSKWLADQSGAAPPARGARKLPRGTISDFTESDAGGHPVRCG  | 3878 |
| CLUBMOSS        | KDLPGGKLSLASFSKMANDOPRGRGS-----SSDLELPQOYDG            | 3489 |
| MOSS            | --ISAEKISLGLSKWLADQDTQGIERV-----SRDFKNEMOILEPQOYNG     | 3650 |
| LIVERWORT       | LNLTQVMSLGLHLSKWLADQDQOISTNQESLGGGGSSKAFRSSEGDIPEPQYAG | 3718 |
| LIGNANO         | DSSSVATARLADFSTWLAEPAAEHDG-----AYLEVPQOYQC             | 3986 |
| COPEPOD         | RYPKFNPSQLKTSFSAWLANFLASD-HV-----QTVLEVPQOYTG          | 3481 |
| GLOBOSUM        | AESKPNKLLKFSPLWLESEYQIGN-YD-----PTEYLEVPQOYTG          | 3469 |
| PALUSTRIS       | EALPQGMVALKNYSPLWLTNPNARD-YN-----EELELPQOYEG           | 3536 |
| NEOCALLIMASTIX  | ERNETYKTQLKNYSNWLSEYQGN-YD-----RELELPQOYDG             | 3643 |
| GLOMUS          | RKAQEGVNLKYSYSAWLAEPSSN-VE-----KELELPQOYDG             | 3659 |
| LOBOSPOR        | SKKQSDADLLKAYSPWLANQASD-YD-----GVLELPQOYSG             | 3632 |
| SYNCEPHALASTRUM | AESGREAGLLKYSPLWLTNQAAN-FN-----ESLEVPQOYSG             | 3615 |
| FUNGIVORUM      | NPKKTAKMKLVDFSSWLANEQLD-RG-----NGSSELPQOYSG            | 3577 |
| HALBUM          | KPSTATMKLDFSNWLEDRSN-QL-----TELELPQOYHG                | 3733 |
| DPURPUREUM      | RPTSTATMKLDFSYWLEDRSN-YP-----TSKOLELPQOYNG             | 3742 |
| VIOLACEUM       | KPTSTATMKLDFSPWLAEPDKSN-FS-----SSQEMLELPQOYSG          | 3734 |
| AMPHIPOD        | --WSSSLNDVKELSPWLSYQGSQ-YS-----DRILEPQOYSG             | 3691 |
| SHRIMP          | EEMRKLPRLLKAYSPWLANQASK-YS-----EVLELPQOYTG             | 3662 |
| MUDCRAB         | RRKENAPNLKAYSPWLANQASK-HS-----DVLELPQOYSG              | 3653 |
| TARDIGRADE      | RETLSPRGLADLNPWLAAPTSLQ-YG-----RALELPQOYDG             | 3683 |
| HYDRA           | --YKSIINASLDYSPWLSYQPSD-FL-----DRLELPQOYTG             | 3554 |
| SALPINGOECA     | YDTKPPRTLLKEYSPWLSKLRSPG-AV-----FDILEPQOYDG            | 3777 |
| SPIDER          | --KDKKLSLKDASPLWLEPQWK-YS-----SQLELPQOYTG              | 3672 |
| LIMULUS         | -CLNVGSRKLDLGLSDPWFHPFK-YQ-----DBLELPQOYTG             | 3740 |
| SCORPION        | --SEMKEAKLRDFSDWLESEHSLK-YS-----EFILEPQOYTG            | 3693 |
| ROTIFFER        | CQRKPMGSLGDYSALKGLKRNIT-T-----KFILEPQOYNG              | 3645 |
| CIONA           | --PTLGTSLNDYSPWLAQQLSRSS-----KELEVPQOYDG               | 3727 |
| OCTOPUS         | KQKLKEPKALEEFSSWLANDPL--L-----DTLELPQOYHG              | 3614 |
| CAPITELLA       | AFSNQPRKLLKEYSQWLAEPQAGN-HE-----ASLELPQOYTG            | 3681 |
| LIMPET          | RGKLVPPSLHEYSQWLAEPNPNR-DS-----RELELPQOYDG             | 3662 |
| SCALLOP         | NPRLLPASPKEYCKWMDVFNPNR-EG-----NNLELPQOYTG             | 3752 |
| LINGULA         | HPNLVPSEKLDYSKWMSGLAAQD-MD-----LSLELPQOYTG             | 3698 |
| OYSTER          | EKNLKPANLKYDQWLANPNPSI-QG-----KDLELPQOYDG              | 3700 |
| SNAIL           | KADLTPPTNIGKYCSWLANPNPNH-ES-----RELELPQOYDG            | 3703 |
| SPONGE          | LNKPFSSALLKDYSPWLDTRQED-YL-----QVLEVPQOYDG             | 3746 |
| PRIAPULA        | TKAADSPGNLKEYSTWLTDFHSSP-AT-----CQLELPQOYRG            | 3730 |
| DANIO           | RGFQKEPGNLKEYSPWLSYKAEF-LK-----NELEVPQOYDG             | 3701 |
| ESHARK          | -QKPEPGNLKEYSPWMSNKPQF-LG-----NELELPQOYDG              | 3722 |
| BHARK           | KKQAPPGNLKEYSPWMSKPEY-LR-----NDLELPQOYDG               | 3716 |
| XENOPUS         | KEQKEPGNLKEYSPWMSKPEF-LR-----NELELPQOYSG               | 3724 |
| STERLET         | QKKEPGNLKEYSPWMSNKPVEF-LR-----NELELPQOYDG              | 3732 |
| GAR             | MDSIALPGNLKEYSSWLSNRPET-LR-----NELEVPQOYDG             | 3729 |
| HUMAN           | NKDSKPPGNLKECSPWMSDKVEF-LR-----NELELPQOYDG             | 3707 |
| PLATYPUS        | KESSKPPGNLKECSPWMSDRVEF-LR-----SELELPQOYDG             | 3714 |
| TASDEVIL        | REDSKPPGNLKECSPWMSNKPVEF-LR-----NELEVPQOYDG            | 3719 |
| COELACANTH      | RKFQREPGNLKEYSPWMSQKPEF-LR-----NELELPQOYDG             | 3723 |
| CAECILIAN       | RGSQPEPGNLKEYSPWMSNKPVEF-LR-----HELELPQOYNG            | 3726 |
| CANARY          | IKTHKEPGNLKECSPWMSKAEF-LR-----SELEVPQOYDG              | 3715 |
| OSTRICH         | IKSHKEPGNLKECSPWMSKAEF-LR-----HELEVPQOYDG              | 3695 |
| GECKO           | KECHQEPGNLKECSPWMSKPEF-LK-----HELELPQOYDG              | 3725 |
| TURTLE          | KD-QKEPGNLKECSPWMSDKAEF-MR-----NELELPQOYDG             | 3723 |
| ALLIGATOR       | RDGQKEPGNLKEYSPWLSKAEF-WR-----NELELPQOYDG              | 3682 |
| APLYSIA         | NKROPAAANLKYDYPWMAEPNSH-NG-----RELELPQOYRG             | 3767 |
| TRICHOPLAX      | GKIKNRPENLKEYCPLSNQAAN-FT-----YSLEVPQOYTG              | 3712 |
| SOFTCORAL       | MKAKKLVGNLKYDYPWLANQVQS-ET-----IQLELPQOYSG             | 3725 |
| STONYCORAL      | RNRTPPPGNLKEYSPWLSRQSN-FT-----HTLELPQOYKG              | 3751 |
| SEA ANEMONE     | QMVSKPPGNLKEYSPWLTNQAAS-HA-----QKLEVPQOYTG             | 3699 |
| SEACUKE         | --GAKDPGNLKEYSPWLTNQLTE-Q-----AQLELPQOYTG              | 3726 |
| LANCELET        | KANCYAPGLLKYDYPWLSDNPLD-YD-----RELELPQOYTG             | 3782 |
| STARFISH        | --RRDPPGNLKEYSTWMSDQQLS-YD-----RELELPQOYSG             | 3772 |
| SEA URCHIN      | --GKDDPGNLKEYSPWLTNQLR-G-----DBLELPQOYDG               | 3753 |

Supplementary Figure 6 CLUSTAL OMEGA ALL PHYLA, EXPANDED

|                 |                                                              |      |
|-----------------|--------------------------------------------------------------|------|
| PARAMECIUM      | M-----NEFDIQMTPKIASFDQGLVLSLIRKPKRIKTYGDEKQVLFVWKGEDLRL      | 3596 |
| TETRAHYMENA     | G----AVITPEPYKESHKIQSFDQSILILQSIIRPKRRLCIYDDEKCKKLVWKGEDLRL  | 3988 |
| STYLONCHEIA     | -----LKSEPLIEKNVKIASVKKTLILGSIIRPKRITVHFSDEKDVHLIKGCEDLRL    | 3858 |
| APHANOMYCEsa    | H-----WGPPEPATHYVILSCPEQLMVLPSKQLPKRLVLAHDERTVMVWKGCEDLRL    | 3411 |
| APHANOMYCEse    | R-----WAKPDPSTHYVILSCDPQLMVLPSKQLPKRLKLYVDEKTYLVWKGCEDLRL    | 3338 |
| PYTHIUM         | Y-----WGPDLNHHYVILSVAQGLVLSKQLPKKITFHGSDNKGKTYLVWKGCEDLRL    | 3636 |
| PLASMOPARA      | H-----WGPDPATHYVILSFDMSLGLVASKQLPKKLTAHGDEKKNVTLVWKGCEDLRL   | 3600 |
| BREMIA          | Y-----WGPDDSKHVKILSFDVSLGVLASKQLPKKLTMHGDEKETEVLWKGCEDLRL    | 3583 |
| AEDDES          | D-----HKPNVNCNHVKIVVCTELELFFKILRNPIRIRINGSDGKSI'DFLVKYGEDLRO | 3635 |
| MIDGE           | D-----RKPFIEQHVKITVRFETRLKVFRRKQPIETIKMYGDKGSI'SFIIKYGEDLRO  | 3657 |
| BOMBUS          | N-----RKMPQYHAKILKFDOSNLRVWMSMRKPIRITMHSADAKDHFLLKPFEDLRO    | 3489 |
| ANT             | E-----KEEPPHYVIRVAFEPQVEWQSLRKPRIKISIDGDEKCKKLVWKGEDLRL      | 3566 |
| WHIPWORM        | D-----HKPLPEYHVTINSFGAKLQLISLIRKPKVVISIYDDEKDKHKLVWKGEDLRO   | 3608 |
| TRICHNELLA      | D-----RRPFPERRVHIIIGFASDIEIMRSLKPKKICIQDGRDKLVWKGEDLRO       | 3611 |
| BEEFLE          | E-----R1PLVQHVKISGFCPNVSDMSLRKPKITITLIDITKYE'PLVWKGEDLRO     | 3463 |
| BARNACLE        | R-----RRPQPDYHVRVANLSDEALVLSIIEPRVITVREDDAREYR'LKAKGDLRT     | 3501 |
| THRIP           | D-----QKPNPERHIMISGFNDTVLWVPSIRRPVKLTVIGDAGSHN'LVWKGEDLRO    | 3550 |
| FLAFA           | H-----KKPLPHYHAKIARFDQKITVLLSQRPLPKIGIYSDCKEHLV'LVWKGEDLRL   | 3540 |
| WHITEFLY        | K-----MRPDLKNHIMTAGFKTEVSVWQSLRRPKITMIGDGNHYS'LVWKGCEDLRO    | 3628 |
| TICK            | R-----SKMPPEYHVNIFGFEESVLVLSMRPRTITRDEKCHH'LVWKGEDLRO        | 3574 |
| TERMITE         | E-----SKPLIQHHVKIAGFKQTVVPMKILRLPLQVTFISDGAKEHQ'LVWKGEDLRO   | 3633 |
| DAPHNIA         | T-----LKVETFRDEIQYLSKQLPVRITVWVAVGAVE'PIVWKGEDLRO            | 3327 |
| OSTREOCOCCUS    | L-----IAPPDASRHTVMGFAPDVLFAKSRPKKILMRGDEKQVLFVWKGEDLRL       | 3577 |
| STENTOR         | D-----QEPKRNSTPSTFDOSILVLSAKKPKRIIGHFSDEKQVLFVWKGEDLRL       | 3277 |
| KLEBSORMIDIUM   | F-----CRPDDGSHVTVGQDITLCSFSLRKPRIKISIDGDEKCKKLVWKGEDLRL      | 3931 |
| CLUBMOSS        | L-----QCPDVSSTHILVGFDETLILSLSKRQPKLITMRSDEKCKKLVWKGEDLRL     | 3542 |
| MOSS            | S-----SIPNLSHVQLLGFDOVLICLKSQRPKLITMRSDEKCKKLVWKGEDLRL       | 3703 |
| LIVERWORT       | F-----REPSDILVHKLLGFDOTLICLSKQRPKLITMRSDEKCKKLVWKGEDLRL      | 3771 |
| LIGNANO         | RDSL'TASLAKPOPELHRIAGFGDTRVWMSLRRPRLITRSDORR'PLVWKGEDLRO     | 4046 |
| COPEPOD         | F-----SRPDTTRHITISSFEPGLNVFSLRKPVKISIDGDEKCKKLVWKGEDLRL      | 3534 |
| GLOBOSUM        | T-----SEPNISQHVLSNFDPNVWMSMRKPKIIMIGDEREY'LVWKGEDLRL         | 3522 |
| PALUSTRIS       | L-----AMPDPOQHVKISFHSFVWMSMRKPKLITIGDDEKHP'LVWKGEDLRL        | 3589 |
| NEOCALLIMASTIX  | K-----YNRPLKHKMISIFNSNIVLNSLRKPKRIEITGDEKQVLFVWKGEDLRL       | 3696 |
| GLIOMUS         | L-----LSIPDPSKHIIKIASFDPKILVLSLRKPKRIITIGDGNHYS'LVWKGEDLRL   | 3713 |
| LOBOSPOR        | L-----TPPNSQQTATVRFDQRVWMSLIRKPKRIKISIDGDEKHLV'LVWKGEDLRL    | 3685 |
| SYNCEPHALASTRUM | L-----SRPYPEYHARIASFDDRLVWMSLIRKPKRIKISIDGQVLFVWKGEDLRL      | 3668 |
| FUNCTIVORUM     | T-----R1PVPSEHVKITGFDASVILWMSLIRKPKRIKISIDGDEKCKKLVWKGEDLRL  | 3630 |
| HALBUM          | T-----SKPQPEILKISSFDPNLLVWMSLIRKPKRIKISIDGDEKQVLFVWKGEDLRL   | 3786 |
| DUPURPUREUM     | F-----GKQPEYHVTISSFDSNLLVWMSLIRKPKRIKISIDDERD'PLVWKGEDLRL    | 3795 |
| PVIOACEUM       | V-----GKQPPDTHIKISSFDNLLVWMSLIRKPKRIKISIDGDEKQVLFVWKGEDLRL   | 3787 |
| AMPHIPOD        | F-----SKPNVEHHPICISSVDNLLVWMSLIRKPKRIKISIDDEKTY'LVWKGEDLRT   | 3744 |
| SHRIMP          | M-----SKPLPEYHVKISSFDENLLVWMSMRVPMRIIRGDEKCKKLVWKGEDLRT      | 3715 |
| MUDCRAB         | V-----SKPLPEYHVNISFDENWVWMSLRRPRLVIRGDEKDKH'LVWKGEDLRT       | 3706 |
| TARDIGRADE      | R-----ERRRPEYHVKITSGFDQVLLIASIRRPRIIRIGDDEKQVLFVWKGEDLRL     | 3736 |
| HYDRA           | E-----SKPIVEYHVKINGFDERVWMSLIRKPKRIITRDEKQVLFVWKGEDLRO       | 3607 |
| SALPINGOBECA    | T-----EMPIPEHAKITRFDKLLIMASIRRPRLITRSDEREY'LVWKGEDLRT        | 3830 |
| SPIDER          | R-----SKPLPEYHVKIAGFDGKVLVLSLIRKPKRIITRDEKCKKLVWKGEDLRO      | 3725 |
| LIMULUS         | T-----AKPLPEYHVKVSGFDQVRLNLSLRKPKRIITRDEKCKKLVWKGEDLRO       | 3793 |
| SCORPION        | K-----RKPLPEYHVKICNFDQVYVLSLIRKPKRIITRSDQKQ'LVWKGEDLRO       | 3746 |
| ROTIIFER        | N-----EKMPPEYHVKISFDERVWMSLIRKPKRIITRDEKCKKLVWKGEDLRO        | 3698 |
| CLIONA          | K-----SRPLLEYHATITGFDNRVWMSLIRKPKRIITRDEKQVLFVWKGEDLRO       | 3780 |
| OCTOPOUS        | F-----SKPLLEYHVKISSFDQVQVFRSLRKPKRIITRSDNKGKTY'LVWKGEDLRO    | 3667 |
| CAPITELLA       | E-----VCLPEYHAKISSFDSQVTVLRSLRKPKRIITRDEKCKKLVWKGEDLRO       | 3734 |
| LIMPET          | L-----SKPLPEYHVKVAGFDERVWMSLIRKPKRIITRDEKQVLFVWKGEDLRO       | 3715 |
| SCALLOP         | L-----TKPLPEYHVKIAGFDQRVWMSMRKPKRVIRGDEKCKKLVWKGEDLRO        | 3805 |
| LINGULA         | L-----SKMPPEYHVKIAGFDSRVLVLSMRKPKRIITRDMQKH'LVWKGEDLRO       | 3751 |
| OYSTER          | V-----KKMPPEYHVKVAGFQRVWMSLIRKPKRIITRDEREY'LVWKGEDLRO        | 3753 |
| SNAIL           | L-----RKMPPEYHVKVAGFDERVWMSLIRKPKRIITRDEKQVLFVWKGEDLRO       | 3756 |
| SPONGE          | R-----SKPLPEYHAKITRFDKVLVLSLIRKPKRIITRQDTEREY'LVWKGEDLRL     | 3799 |
| PRIAPULA        | R-----SKMPPEYHVKIAGFDERVWMSLIRKPKRIITRDEKCKKLVWKGEDLRO       | 3783 |
| DANTIO          | K-----SKPLPEYHAKITGFDERVWMSLIRKPKRIITRDERO'PLVWKGEDLRO       | 3754 |
| ESHARK          | K-----CKPLPEYHAKITGFDERVWMSLIRKPKRIITRDEKCKKLVWKGEDLRO       | 3775 |
| BHSHARK         | K-----SKMPPEYHAKITGFDERIKVMSLIRKPKRIITRDEKCKKLVWKGEDLRO      | 3769 |
| XENOPUS         | R-----SKMPPEYHVKISGFDERSVMSLIRKPKRIITRDERE'PLVWKGEDLRO       | 3777 |
| STERLET         | K-----CKPLPEYHAKITGFDERIKVMSMRKPKRIITRDERE'PLVWKGEDLRO       | 3785 |
| GAR             | R-----SKPLPEYHAKITGFDERVWMSLIRKPKRIITRDERO'PLVWKGEDLRO       | 3782 |
| HUMAN           | R-----GKPLPEYHVKIAGFDERVWMSLIRKPKRIITRDEREY'LVWKGEDLRO       | 3760 |
| PLATYPUS        | K-----GKPLPEYHAKITGFDERVWMSLIRKPKRIITRDEREY'LVWKGEDLRO       | 3767 |
| TASDEVIL        | R-----GKPLPEYHAKITGFDERVWMSLIRKPKRIITRDEKCKKLVWKGEDLRO       | 3772 |
| COELACANTH      | K-----SKMPPEYHAKITGFDERIKVMSLIRKPKRIITRDEREY'LVWKGEDLRO      | 3776 |
| CAECILIAN       | R-----SKPLPEYHVKISGFDERSVMSLIRKPKRIITRDEKCKKLVWKGEDLRO       | 3779 |
| CANARY          | K-----GKPLPEYHAKISGFDERSVMSLIRKPKRIITRDERE'PLVWKGEDLRO       | 3768 |
| OSTRICH         | K-----GKPLPEYHVKISGFDERIKVMSMRKPKRIITRDERE'PLVWKGEDLRO       | 3738 |
| GECKO           | K-----GKPLPEYHAKITGFDERIKVMSLIRKPKRIITRDERE'PLVWKGEDLRO      | 3778 |
| TURTLE          | K-----SKPLPEYHAKISGFDERIKVMSLIRKPKRIITRDERE'PLVWKGEDLRO      | 3776 |
| ALLIGATOR       | K-----GKPLPEYHAKISGFDERIKVMSLIRKPKRIITRDERE'PLVWKGEDLRO      | 3735 |
| APLYSIA         | L-----DKPLPEYHVKISGFDERVWMSLIRKPKRIITRDERO'PLVWKGEDLRO       | 3820 |
| TRICHOPLAX      | R-----SKPLPEYHVKIASGFERLVLVLSLRKPKRIITRDEKCKKLVWKGEDLRL      | 3765 |
| SOFTCORAL       | Q-----SKPLPEYHVKVAGFGEKVKMSLIRKPKRIITRDEREHT'LVWKGEDLRL      | 3778 |
| STONYCORAL      | K-----TKPLPEYHVKVAGFDEKQVLPVLSIRKPKRIITRDEKCKKLVWKGEDLRL     | 3804 |
| SEA_ANEMONE     | Q-----SKMPPEYHVNIFGFEESVLVLSIRKPKRIITRSDDEREY'LVWKGEDLRL     | 3752 |
| SEAUCUKE        | V-----SKPLPEYHVKIAGFDEQVRLVLSLRKPKRIITRDEKCKKLVWKGEDLRL      | 3779 |
| LANCELET        | K-----VKPLMQYHAKIAGFDQRVWMSLIRKPKRIITRDERO'PLVWKGEDLRO       | 3835 |
| STARFISH        | K-----SKPLPEYHVKIAGFDEQVRLVLSMRKPKRIITRDEREY'LVWKGEDLRL      | 3825 |
| SEA_URCHIN      | S-----KKPLPAYHVKIAGFDETVLILSLIRKPKRIITRDEKQVLFVWKGEDLRL      | 3806 |

Supplementary Figure 6 CLUSTAL OMEGA ALL PHYLA, EXPANDED

|                 |                     |      |                      |           |      |
|-----------------|---------------------|------|----------------------|-----------|------|
| PARAMECIUM      | DRIEELLQVMMNIFKADPP | OSKE | LNLSRNIIPMNIKLLEAVDK | SVLKEILNK | 4046 |
| TETRAHYMENA     | DRIEELLQVMMNIFKADPP | OSKE | LNLSRNIIPMNIKLLEAVDK | SVLKEILNK | 4046 |
| STYLONCCHIA     | DRIEELLQVMMNIFKADPP | OSKE | LNLSRNIIPMNIKLLEAVDK | SVLKEILNK | 4046 |
| APHANOMYCESa    | DRIEELLQVMMNIFKADPP | OSKE | LNLSRNIIPMNIKLLEAVDK | SVLKEILNK | 4046 |
| APHANOMYCESa    | DRIEELLQVMMNIFKADPP | OSKE | LNLSRNIIPMNIKLLEAVDK | SVLKEILNK | 4046 |
| PHYTHIUM        | DRIEELLQVMMNIFKADPP | OSKE | LNLSRNIIPMNIKLLEAVDK | SVLKEILNK | 4046 |
| PLASMODIUM      | DRIEELLQVMMNIFKADPP | OSKE | LNLSRNIIPMNIKLLEAVDK | SVLKEILNK | 4046 |
| BREMIA          | DRIEELLQVMMNIFKADPP | OSKE | LNLSRNIIPMNIKLLEAVDK | SVLKEILNK | 4046 |
| AEDDES          | DRIEELLQVMMNIFKADPP | OSKE | LNLSRNIIPMNIKLLEAVDK | SVLKEILNK | 4046 |
| MIDGE           | DRIEELLQVMMNIFKADPP | OSKE | LNLSRNIIPMNIKLLEAVDK | SVLKEILNK | 4046 |
| BOMBUS          | DRIEELLQVMMNIFKADPP | OSKE | LNLSRNIIPMNIKLLEAVDK | SVLKEILNK | 4046 |
| ANT             | DRIEELLQVMMNIFKADPP | OSKE | LNLSRNIIPMNIKLLEAVDK | SVLKEILNK | 4046 |
| WHIPWORM        | DRIEELLQVMMNIFKADPP | OSKE | LNLSRNIIPMNIKLLEAVDK | SVLKEILNK | 4046 |
| TRICHIANELLA    | DRIEELLQVMMNIFKADPP | OSKE | LNLSRNIIPMNIKLLEAVDK | SVLKEILNK | 4046 |
| BEEFLE          | DRIEELLQVMMNIFKADPP | OSKE | LNLSRNIIPMNIKLLEAVDK | SVLKEILNK | 4046 |
| BARNACLE        | DRIEELLQVMMNIFKADPP | OSKE | LNLSRNIIPMNIKLLEAVDK | SVLKEILNK | 4046 |
| THRIP           | DRIEELLQVMMNIFKADPP | OSKE | LNLSRNIIPMNIKLLEAVDK | SVLKEILNK | 4046 |
| FLA             | DRIEELLQVMMNIFKADPP | OSKE | LNLSRNIIPMNIKLLEAVDK | SVLKEILNK | 4046 |
| WHITEFLY        | DRIEELLQVMMNIFKADPP | OSKE | LNLSRNIIPMNIKLLEAVDK | SVLKEILNK | 4046 |
| TICK            | DRIEELLQVMMNIFKADPP | OSKE | LNLSRNIIPMNIKLLEAVDK | SVLKEILNK | 4046 |
| TERMITE         | DRIEELLQVMMNIFKADPP | OSKE | LNLSRNIIPMNIKLLEAVDK | SVLKEILNK | 4046 |
| DAPHNIA         | DRIEELLQVMMNIFKADPP | OSKE | LNLSRNIIPMNIKLLEAVDK | SVLKEILNK | 4046 |
| OSTREOCOCCLUS   | DRIEELLQVMMNIFKADPP | OSKE | LNLSRNIIPMNIKLLEAVDK | SVLKEILNK | 4046 |
| STENTOR         | DRIEELLQVMMNIFKADPP | OSKE | LNLSRNIIPMNIKLLEAVDK | SVLKEILNK | 4046 |
| KLEBSORIDIUM    | DRIEELLQVMMNIFKADPP | OSKE | LNLSRNIIPMNIKLLEAVDK | SVLKEILNK | 4046 |
| CLUBMOSS        | DRIEELLQVMMNIFKADPP | OSKE | LNLSRNIIPMNIKLLEAVDK | SVLKEILNK | 4046 |
| MOSS            | DRIEELLQVMMNIFKADPP | OSKE | LNLSRNIIPMNIKLLEAVDK | SVLKEILNK | 4046 |
| LIVERWORT       | DRIEELLQVMMNIFKADPP | OSKE | LNLSRNIIPMNIKLLEAVDK | SVLKEILNK | 4046 |
| LIGNANO         | DRIEELLQVMMNIFKADPP | OSKE | LNLSRNIIPMNIKLLEAVDK | SVLKEILNK | 4046 |
| COPEPOD         | DRIEELLQVMMNIFKADPP | OSKE | LNLSRNIIPMNIKLLEAVDK | SVLKEILNK | 4046 |
| GLOBOSUM        | DRIEELLQVMMNIFKADPP | OSKE | LNLSRNIIPMNIKLLEAVDK | SVLKEILNK | 4046 |
| PALUSTRIS       | DRIEELLQVMMNIFKADPP | OSKE | LNLSRNIIPMNIKLLEAVDK | SVLKEILNK | 4046 |
| NEOCALLIMASTIX  | DRIEELLQVMMNIFKADPP | OSKE | LNLSRNIIPMNIKLLEAVDK | SVLKEILNK | 4046 |
| GLOMUS          | DRIEELLQVMMNIFKADPP | OSKE | LNLSRNIIPMNIKLLEAVDK | SVLKEILNK | 4046 |
| LOBOSPOR        | DRIEELLQVMMNIFKADPP | OSKE | LNLSRNIIPMNIKLLEAVDK | SVLKEILNK | 4046 |
| SYNCEPHALASTRUM | DRIEELLQVMMNIFKADPP | OSKE | LNLSRNIIPMNIKLLEAVDK | SVLKEILNK | 4046 |
| FUNCTIVORUM     | DRIEELLQVMMNIFKADPP | OSKE | LNLSRNIIPMNIKLLEAVDK | SVLKEILNK | 4046 |
| HALBUM          | DRIEELLQVMMNIFKADPP | OSKE | LNLSRNIIPMNIKLLEAVDK | SVLKEILNK | 4046 |
| DUPURPUREUM     | DRIEELLQVMMNIFKADPP | OSKE | LNLSRNIIPMNIKLLEAVDK | SVLKEILNK | 4046 |
| PVIOLACEUM      | DRIEELLQVMMNIFKADPP | OSKE | LNLSRNIIPMNIKLLEAVDK | SVLKEILNK | 4046 |
| AMPHIPOD        | DRIEELLQVMMNIFKADPP | OSKE | LNLSRNIIPMNIKLLEAVDK | SVLKEILNK | 4046 |
| SHRIMP          | DRIEELLQVMMNIFKADPP | OSKE | LNLSRNIIPMNIKLLEAVDK | SVLKEILNK | 4046 |
| MUDCRAB         | DRIEELLQVMMNIFKADPP | OSKE | LNLSRNIIPMNIKLLEAVDK | SVLKEILNK | 4046 |
| TARDIGRADE      | DRIEELLQVMMNIFKADPP | OSKE | LNLSRNIIPMNIKLLEAVDK | SVLKEILNK | 4046 |
| HYDRA           | DRIEELLQVMMNIFKADPP | OSKE | LNLSRNIIPMNIKLLEAVDK | SVLKEILNK | 4046 |
| SALPINGOCEA     | DRIEELLQVMMNIFKADPP | OSKE | LNLSRNIIPMNIKLLEAVDK | SVLKEILNK | 4046 |
| SPIDER          | DRIEELLQVMMNIFKADPP | OSKE | LNLSRNIIPMNIKLLEAVDK | SVLKEILNK | 4046 |
| LIMULUS         | DRIEELLQVMMNIFKADPP | OSKE | LNLSRNIIPMNIKLLEAVDK | SVLKEILNK | 4046 |
| SCORPION        | DRIEELLQVMMNIFKADPP | OSKE | LNLSRNIIPMNIKLLEAVDK | SVLKEILNK | 4046 |
| ROTIFFER        | DRIEELLQVMMNIFKADPP | OSKE | LNLSRNIIPMNIKLLEAVDK | SVLKEILNK | 4046 |
| CIONA           | DRIEELLQVMMNIFKADPP | OSKE | LNLSRNIIPMNIKLLEAVDK | SVLKEILNK | 4046 |
| OCTOPOUS        | DRIEELLQVMMNIFKADPP | OSKE | LNLSRNIIPMNIKLLEAVDK | SVLKEILNK | 4046 |
| CAPITELLA       | DRIEELLQVMMNIFKADPP | OSKE | LNLSRNIIPMNIKLLEAVDK | SVLKEILNK | 4046 |
| LIMPET          | DRIEELLQVMMNIFKADPP | OSKE | LNLSRNIIPMNIKLLEAVDK | SVLKEILNK | 4046 |
| SCALLOP         | DRIEELLQVMMNIFKADPP | OSKE | LNLSRNIIPMNIKLLEAVDK | SVLKEILNK | 4046 |
| LINGULA         | DRIEELLQVMMNIFKADPP | OSKE | LNLSRNIIPMNIKLLEAVDK | SVLKEILNK | 4046 |
| OYSTER          | DRIEELLQVMMNIFKADPP | OSKE | LNLSRNIIPMNIKLLEAVDK | SVLKEILNK | 4046 |
| SNAIL           | DRIEELLQVMMNIFKADPP | OSKE | LNLSRNIIPMNIKLLEAVDK | SVLKEILNK | 4046 |
| SPONGE          | DRIEELLQVMMNIFKADPP | OSKE | LNLSRNIIPMNIKLLEAVDK | SVLKEILNK | 4046 |
| PRIAPULA        | DRIEELLQVMMNIFKADPP | OSKE | LNLSRNIIPMNIKLLEAVDK | SVLKEILNK | 4046 |
| DANTIO          | DRIEELLQVMMNIFKADPP | OSKE | LNLSRNIIPMNIKLLEAVDK | SVLKEILNK | 4046 |
| ESHARK          | DRIEELLQVMMNIFKADPP | OSKE | LNLSRNIIPMNIKLLEAVDK | SVLKEILNK | 4046 |
| BHARK           | DRIEELLQVMMNIFKADPP | OSKE | LNLSRNIIPMNIKLLEAVDK | SVLKEILNK | 4046 |
| XENOPUS         | DRIEELLQVMMNIFKADPP | OSKE | LNLSRNIIPMNIKLLEAVDK | SVLKEILNK | 4046 |
| STERLET         | DRIEELLQVMMNIFKADPP | OSKE | LNLSRNIIPMNIKLLEAVDK | SVLKEILNK | 4046 |
| GAR             | DRIEELLQVMMNIFKADPP | OSKE | LNLSRNIIPMNIKLLEAVDK | SVLKEILNK | 4046 |
| HUMAN           | DRIEELLQVMMNIFKADPP | OSKE | LNLSRNIIPMNIKLLEAVDK | SVLKEILNK | 4046 |
| PLATYPUS        | DRIEELLQVMMNIFKADPP | OSKE | LNLSRNIIPMNIKLLEAVDK | SVLKEILNK | 4046 |
| TASDEVIL        | DRIEELLQVMMNIFKADPP | OSKE | LNLSRNIIPMNIKLLEAVDK | SVLKEILNK | 4046 |
| COELACANTH      | DRIEELLQVMMNIFKADPP | OSKE | LNLSRNIIPMNIKLLEAVDK | SVLKEILNK | 4046 |
| CAECILIAN       | DRIEELLQVMMNIFKADPP | OSKE | LNLSRNIIPMNIKLLEAVDK | SVLKEILNK | 4046 |
| CANARY          | DRIEELLQVMMNIFKADPP | OSKE | LNLSRNIIPMNIKLLEAVDK | SVLKEILNK | 4046 |
| OSTRICH         | DRIEELLQVMMNIFKADPP | OSKE | LNLSRNIIPMNIKLLEAVDK | SVLKEILNK | 4046 |
| GECKO           | DRIEELLQVMMNIFKADPP | OSKE | LNLSRNIIPMNIKLLEAVDK | SVLKEILNK | 4046 |
| TURTLE          | DRIEELLQVMMNIFKADPP | OSKE | LNLSRNIIPMNIKLLEAVDK | SVLKEILNK | 4046 |
| ALLIGATOR       | DRIEELLQVMMNIFKADPP | OSKE | LNLSRNIIPMNIKLLEAVDK | SVLKEILNK | 4046 |
| APLYSIA         | DRIEELLQVMMNIFKADPP | OSKE | LNLSRNIIPMNIKLLEAVDK | SVLKEILNK | 4046 |
| TRICHOPLAX      | DRIEELLQVMMNIFKADPP | OSKE | LNLSRNIIPMNIKLLEAVDK | SVLKEILNK | 4046 |
| SOFTCORAL       | DRIEELLQVMMNIFKADPP | OSKE | LNLSRNIIPMNIKLLEAVDK | SVLKEILNK | 4046 |
| STONYCORAL      | DRIEELLQVMMNIFKADPP | OSKE | LNLSRNIIPMNIKLLEAVDK | SVLKEILNK | 4046 |
| SEA ANEMONE     | DRIEELLQVMMNIFKADPP | OSKE | LNLSRNIIPMNIKLLEAVDK | SVLKEILNK | 4046 |
| SEACUCU         | DRIEELLQVMMNIFKADPP | OSKE | LNLSRNIIPMNIKLLEAVDK | SVLKEILNK | 4046 |
| LANCELET        | DRIEELLQVMMNIFKADPP | OSKE | LNLSRNIIPMNIKLLEAVDK | SVLKEILNK | 4046 |
| STARFISH        | DRIEELLQVMMNIFKADPP | OSKE | LNLSRNIIPMNIKLLEAVDK | SVLKEILNK | 4046 |
| SEA_URCHIN      | DRIEELLQVMMNIFKADPP | OSKE | LNLSRNIIPMNIKLLEAVDK | SVLKEILNK | 4046 |

\* : \* :

Supplementary Figure 6 CLUSTAL OMEGA ALL PHYLA, EXPANDED

|                 |                                                      |      |
|-----------------|------------------------------------------------------|------|
| PARAMECIUM      | EHQEEEGLE-----LFXNKALSKRDEYAAKAAK---RQCQYNE-----     | 3681 |
| TETRAHYMENA     | EFQEKMGSKED-----IAQDNEGLRMRREWLKQL---DRKGGLA-----    | 4082 |
| STYLONCHEIA     | EHRNEAGKD-----LNQSRALNERRKWLKSSVPGNAKKEGKIT-----     | 3954 |
| APHANOMYCESa    | EWDDG-----T---SSKKTNLLQRPQVQYEFWAK-----QR-----       | 3500 |
| APHANOMYCESa    | EM-----STTKSNLLQSPPGQLYENFWSK-----QR-----            | 3423 |
| PYTHIUM         | QLQVDLRCETELLS---NKRAKQLFNTPAKNYETYLK-----QR-----    | 3732 |
| PLASMOPIARA     | QLQIDERCVLKLS---NNSQKLDLNFNTAAKAYESFLLLE-----QR----- | 3696 |
| BREIMIA         | QMVDERCIDLKS---DKSKKLDLNFNTAAKAYESFHRK-----QQ-----   | 3679 |
| AEDES           | SMVRFNTD---GD-----VTGAINAETIQLFHE-----ASGMT---RSPS   | 3727 |
| MIDGE           | TTSNFIQKSLYD-----FIPEIRNEYKNFLIG-----NENFT---T---    | 3748 |
| BOMBUS          | TLSKQETIE-----RHNSISKLYQEWIQN-----VAPSK-----         | 3575 |
| ANT             | TLNRKEKE-----CKMIRDEYAGWLN-----APMK-----             | 3652 |
| WHIPWORM        | ---PADRRN-----YQAMALKALSEGPIA-----ILLTWPWGGL-----    | 3697 |
| TRICHINELLA     | ---ESLRKQ-----YQTIAMEMTEGPEK-----ILLKAAGESS-----     | 3701 |
| BEEBLE          | -----EN-----F-DKVVVETFTKWIYT-----SANQS-----P         | 3543 |
| BARNACLE        | ACP---DLEQ-----QCAEARELFRKQMR-----HATQS-----G        | 3587 |
| THRIP           | SRQLSDQDR-----VSIRTKHESWLK-----YVKVK-----D           | 3636 |
| FLEA            | --KEPGKLN-----RVEEVRSYKNIWIRQ-----ASKTD-----P        | 3626 |
| WHITEFLY        | FFLESDETEK-----YKQVAEHYSTWLSK-----CCRTN-----P        | 3716 |
| TICK            | GLDESSQGN-----LARC-SRSPGLWSTE-----D-----             | 3656 |
| TERMITE         | VLDKNEKES-----YKKS-CEEHCKWISK-----PCNPQ-----C        | 3720 |
| DAPHNIA         | DINFRSSLKSLK-----P-----DLERK-----LSAN-----           | 3407 |
| OSTREOCOCCUS    | PVTGMDID-----PFKEHQRWIREHARGIGKRRKIDAGG-----EM       | 3671 |
| STENTOR         | ELSKYISL-----TBANKRQVWLS-----LPAI-----T              | 3364 |
| KLEBSORMIDIUM   | GLAASNLQTPDGA-----KTLSDVQGWQWLT-----HGA-----V        | 4025 |
| CLUBMOSS        | GVAQQLAAAKRKEK-----AGDLLVELRNQYHOFVKE-----KGG-----   | 3636 |
| MOSS            | GLSKLASRTHGYKPLQATSETLLKEIQHEYIEWVRK-----KGG-----    | 3803 |
| LIVERWORT       | GLLCKMNLNRREGKDA---PLAFLHKLRAQYHEWIMK-----RGGP-----S | 3868 |
| LIGNANO         | QMSAAEQRSK-----OSLDYCKFVSN-----                      | 4127 |
| COPEPOD         | DRKAETEILEA-----RN-----                              | 3605 |
| GLOBOSUM        | SPQFDKMAE-----SQAEYSAPVVK-----FGKS-----G             | 3606 |
| PALUSTRIS       | IPGFKGEYSK-----ADQKHAAPVNS-----YKGH-----A            | 3673 |
| NEOCALLIMASTIX  | MLDDKNLITN-----SRNIYCDWVNS-----FYKR-----G            | 3780 |
| GLOMUS          | EPRTSKVFD-----AQSMHSRW-----V-----Q                   | 3791 |
| LOBOSPOR        | EIPHKETWRK-----AQDYNNKFVAS-----FK-----G              | 3767 |
| SYNCEPHALASTRUM | EVPSALI-A-----ARKAYLAFVVK-----HG-----Q               | 3749 |
| FUNCTIVORUM     | QLAKPTKPKADT-----SLLKTSAAQQDAMVKS-----FGSKVY-GKRR    | 3728 |
| HALBUM          | QMAVHQNVERSNV-----SLSRMEAYITHNEWINS-----FGKYLK-MAN-  | 3883 |
| DPURPUREUM      | QIAIQTTPRSNV-----SISKLEANTHINHWIQS-----FAKYSK-I-N-   | 3891 |
| PVIOLACEUM      | QLAIQTMPRSQV-----SISRLESTKIHNDWIQE-----FSKYLK-GGA-   | 3884 |
| AMPHIPOD        | ALTDTEKRPYS-----KNLVK-----YGDG-----                  | 3824 |
| SHRIMP          | SYRENETKCYG-----EARAL-----YKGN-----                  | 3795 |
| MUDCRAB         | SFKEGEAKCLD-----EAETF-----YRTE-----                  | 3786 |
| TARDIGRADE      | AQSPQDKVSLT-----ASFARYDLIRKQLKISDKKAIPTYAGGK-E-RL    | 3838 |
| HYDRA           | DD---EKKVL-----H-GPSGPKIKYQPYGK-----FEN-----         | 3691 |
| SALPINGOBECA    | GMTDAEREDAKKR-----K-ATQLPQNHFSQFANR-----FSKD-----    | 3921 |
| SPIDER          | GMSETEKKQFY-----KRDGNLAQSEILQWD-----R-----KA         | 3812 |
| LIMULUS         | MFTKQDQERIN-----QAEKKFHSYMKLSL-----SP-----QE         | 3881 |
| SCORPION        | AMTDKESFR-----ESDPKMTYFKLLSK-----TW-----SR           | 3834 |
| ROTIFFER        | DLVNEAQNYA-----EFTYG-----INKD-----G-SK               | 3779 |
| CIONA           | QAKRNNCNSCI-----TEPARTWIPK-----NMVOK-----            | 3864 |
| OCTOPUS         | VLEEKENYIME-----TIERHREFKPK-----YVA-----             | 3750 |
| CAPITELLA       | GCSDVSWEQIQNK-----N-LPNNPANLLCQWI-----GDS---S-NT     | 3825 |
| LIMPET          | ALTEQERKYL-----GDQPGKQKHENWYK-----YFDA---K-K-        | 3805 |
| SCALLOP         | SLTDQERNFVH-----H-KTNGPNGQHTAWLQK-----LGKD-----      | 3894 |
| LINGULA         | TMTEQEAQK-----AA---ILQRNPLSR-----YGNP---S-D-         | 3837 |
| OYSTER          | NLTEQEAQVVS-----GNLHNSWIMK-----L-S---K-DP            | 3837 |
| SNAIL           | AMTEKERTAYF-----GENGSQLHYKWLK-----L-P---K-K-         | 3844 |
| SPONGE          | SDPEKK---SL-----PAASKMNQKWLQ-----KFGGS-----          | 3883 |
| PRIAPULA        | AMTQQQYDAYY-----S-YSMNPVEHFNKWAAAT-----ALTASES-K-RA  | 3878 |
| DANTIO          | RRTTEQKQT-----ITRPNEFYDEWISK-----VAG---K---          | 3839 |
| ESHARK          | NITETQSRR-----QQEVLPKYREWLK-----MGR---K---           | 3862 |
| BHARK           | NMTEDEHKRP-----SP---KELFSEWLQ-----ISGS---K---        | 3854 |
| XENOPUS         | TMTEDEAKIYNS-----K-TTNGPLYHYNAWLDK-----KEK---K---    | 3866 |
| STERLET         | RMTTEERKH-----CKRPAESYMEWLSK-----VAG---K---          | 3870 |
| GAR             | RRTTEPEKS-----SPSPQDMYSAWLEK-----ISR---R---          | 3867 |
| HUMAN           | TMSQEEKAAYL-----S-DPRAPPCEYKDWLTK-----MSG-----       | 3848 |
| PLATYPUS        | SMSEGEKAAE-----S-NPKGPVHEYSWLYK-----MSK-----         | 3855 |
| TASDEVIL        | NMSEEEKAAE-----S-GPKAPQLEYSWTLTK-----ITG-----        | 3860 |
| COELACANTH      | AMTEEERTNYETL-----S-PKKGPKAQYNEWLT-----MAGG-----     | 3867 |
| CAECILIAN       | SMSEAEQENCS-----ST---TKHYKDWIQR-----MGR-----         | 3863 |
| CANARY          | SMSEEDINYY-----SPRGPATYSEWLSR-----MGG---K---         | 3856 |
| OSTRICH         | SMSEEDFNYS-----SKKGPATYNEWLSK-----MGG---K---         | 3826 |
| GECKO           | NMSEKQNDIN-----SKKGPADYNEWLSK-----MGD---R---         | 3866 |
| TURTLE          | SMSEKQDYH-----SKKGPRIYSDWLSK-----MAGK-----           | 3864 |
| ALLIGATOR       | NMSEEEKADYC-----SEKGPLFAYNEWLSK-----MAGG---K---      | 3824 |
| APLYSIA         | AYTEERKPLE-----G-N-QSPVIQHNQWMAK-----LVDK---K-DS     | 3911 |
| TRICHOPLAX      | AMEDHEKQHYL-----S-SQNSPHOLYSKWLK-----FGSA---G---     | 3855 |
| SOFTCORAL       | GLSETENETFD-----T-I---GYKHKNWIVE-----KFPVN---GN      | 3866 |
| STONYCORAL      | AMTKAENDHYI-----G-P-NAGACYRNWIDK-----FKGD-----P      | 3893 |
| SEA ANEMONE     | AATESEKQAMV-----V-RRKTKNML-----D-----                | 3831 |
| SEACUCU         | KSLD-----KSKLEAYGNWVQK-----FRTK---KD                 | 3860 |
| LANCELET        | AMTTREQEAFL-----H-Q-RLPLDFDAYVHR-----LGGT---V-KN     | 3926 |
| STARFISH        | AMTEQEGNAYN-----S-R-HGPRYQHSWVQK-----YAKG---NQ       | 3915 |
| SEA URCHIN      | SMTEAEHKVYT-----S-RTTGPVALFPTWLQK-----FCQT---DG      | 3897 |

Supplementary Figure 6 CLUSTAL OMEGA ALL PHYLA, EXPANDED

|                 |                                                                                                                          |      |
|-----------------|--------------------------------------------------------------------------------------------------------------------------|------|
| PARAMECIUM      | KNKNFEVI-GVLQENATDVVSN-----NEQ-KKYVKD <del>LL</del> RNGLSK <del>SA</del> LEAVF                                           | 3732 |
| TETRAHYMENA     | ----EQH-IKQLQEPDSKIQEA-----NEQ-ADLIPR <del>VFR</del> NALER <del>ASTC</del> EAVLY                                         | 4128 |
| STYLONCHIA      | ----DQH-ICLLGCDEKIVIEG-----NKH-KEALP <del>WYLL</del> RNGLN <del>ENCL</del> TSSAFLA                                       | 4000 |
| APHANOMYCESA    | ---GKTYG-QKVATSATSAVVSS-----VQA-EAAV <del>PCD</del> LLRRRLV <del>HMA</del> TSDTFQ                                        | 3548 |
| APHANOMYCESE    | ---GKTYG-QKIATASSAVTLV-----SQA-QEMV <del>MDL</del> LRRLV <del>NMA</del> CTBAFFQ                                          | 3471 |
| PYTHIUM         | ---GGSPA-AKVIAPSHKDVVAN-----EGA-QALIP <del>ADL</del> LRLLQL <del>GT</del> GSDFEVS                                        | 3780 |
| PLASMODIUM      | ---GATYS-AKVVASRSEDVDFH-----AKV-HAMIP <del>DLR</del> LRRLQL <del>GT</del> GSDFEVS                                        | 3744 |
| BREMIA          | ---GASFS-AKIVAPRSKDVVDF-----HRV-QAMIP <del>ADL</del> LRRLQL <del>GT</del> FEARLL                                         | 3727 |
| AEDDES          | TPLSKLYG-KVAACCTPERITLK-----NEL-RYKIK <del>ED</del> FRKAL <del>FEMAV</del> QSSYS                                         | 3778 |
| MIDGE           | --FSNAYT-NALLRRGGGAMAEF-----ASF-EALLP <del>ODL</del> LRRLS <del>ME</del> SSMVEFYH                                        | 3797 |
| BOMBUS          | Q-LHEKYK-EAIVKMASSEVTMK-----NEF-IGKTE <del>WEL</del> KRKTL <del>TVL</del> CGSLISHT                                       | 3625 |
| ANT             | QRITDRYK-EAVSRYSQVMWEMN-----KKL-ISKTR <del>Q</del> ALRDA <del>ETI</del> SSSPACVVT                                        | 3703 |
| WHIPWORM        | --TPSVYV-KSYATATPTAVVRC-----RHL-LDQIP <del>RHL</del> LRHLK <del>LNC</del> CASPDVQC                                       | 3746 |
| TRICHINELLA     | PLNHLTYY-RSQNITPTPTAARC-----NEV-LKKIP <del>DHL</del> LRDLQ <del>LNC</del> CVSPDVCF                                       | 3752 |
| BEEBLE          | ---FDAYG-RAAMKYSRDKTVK-----KTL-VSKIS <del>WDV</del> FRST <del>LK</del> SSVTEGFA                                          | 3591 |
| BARNACLE        | ANDVQLQS-EYARRAPRDVVADLAAREALMRDE-RGRACS <del>LL</del> QAVFR <del>SS</del> SGPEALLR                                      | 3645 |
| THRIP           | Q-NINIYQ-IAHQDISREASVTF-----NKL-VSMTK <del>PDL</del> LRKGL <del>QL</del> SSSAEGEYV                                       | 3686 |
| FLEA            | TSPVALYG-NAVVHYHRDAVISK-----QEL-VNRIP <del>EDL</del> LRKDS <del>F</del> KEMSA <del>VE</del> SPT                          | 3677 |
| WHITEFLY        | T-AGRIYQ-SAAQTYSRQVVINTY-----NEH-VSKLE <del>KI</del> LRKRS <del>MS</del> SLDLEARTS                                       | 3766 |
| TICK            | -----YAKYKEPSQAVSRP-----GRC-VRQVS <del>RE</del> SLK <del>AL</del> LGT <del>SS</del> CPARFA                               | 3699 |
| TERMITE         | S-FYEKYG-EAHMKYSPEETSAP-----RKK-VNMI <del>PDL</del> LRRAL <del>QR</del> SVSPESHFI                                        | 3770 |
| DAPHNIA         | -----NP-LHFMTATQLQLND-----SNF-ADRVP <del>YL</del> LRGAL <del>KK</del> SSSPESHFY                                          | 3452 |
| OSTREOCOCCLUS   | TTTHEDYL-AAIKKASRKESTLL-----SRLR <del>SS</del> SSS <del>SR</del> LRLL <del>EL</del> QMGVAFM                              | 3723 |
| STENTOR         | TNMLPALH-LEALKDSSTISN-----REH-ESL <del>W</del> DLR <del>Q</del> GLSL <del>ST</del> PSMH                                  | 3415 |
| KLBSORIMIDIUM   | SSLQEAQY-KSYTSLRSQFQAQ-----GVA-GGKLP <del>S</del> DALRAG <del>IAQ</del> APGQSELA                                         | 4076 |
| CLUMBOSS        | KSVHDCYK-NLYTKVKAGEMEARM-----NAL-VAQV <del>P</del> DAL <del>T</del> GLYK <del>R</del> SSASELA                            | 3687 |
| MOSS            | KSQTECYC-NLYRKVGFEEVSLK-----SAL-QGOL <del>P</del> DL <del>R</del> MG <del>S</del> SRV <del>TS</del> ASVLA                | 3854 |
| LIVERWORT       | QAPPECYR-NMYQKATSDEVTKM-----SSI-EAQMP <del>WD</del> FRAG <del>R</del> SVR <del>ATS</del> ASVLA                           | 3919 |
| LIGNANO         | -DHC-----KLYTSLDQVVQRN-----QPL-LDCVP <del>DL</del> LRGLR <del>Q</del> SSSWAYYA                                           | 4173 |
| COPEPOD         | ----AY--KVGKENTSDDIRK-----EKA-VELVE <del>KY</del> LRKNS <del>LK</del> SSSMGEY                                            | 3650 |
| GLOBOSUM        | SGPGGAYE-PPMNNATPRHVIENM-----QSI-WNKNS <del>RYL</del> RFF <del>LK</del> TISA <del>AF</del> FFQ                           | 3657 |
| PALUSTRIS       | RNLGDMYG-NMFRKANRRTMDHM-----SSL-T--SFE <del>P</del> YL <del>R</del> TMH <del>K</del> AS <del>P</del> AF <del>L</del> S   | 3722 |
| NEOCALLIMASTIX  | S--ENVFH-TMFKKASREDTINNL-----IKV-ENQIP <del>K</del> LR <del>K</del> LY <del>L</del> IR <del>PD</del> ILIK                | 3829 |
| GLOMUS          | Q--YKSYH-NMFMEVNRDAVQHP-----KDL-QREIS <del>ND</del> MLK <del>AL</del> YK <del>ST</del> SPSHIS                            | 3840 |
| LOBOSPOR        | D--MMGYH-NLFINGTREKVVKHM-----ESL-YNQF <del>RED</del> YL <del>Q</del> SR <del>AS</del> AS <del>AF</del> AM                | 3816 |
| SYNCEPHALASTRUM | N--VTSYV-TTYKESRDSVRA-----EQS-VSHLE <del>P</del> DL <del>R</del> HL <del>LK</del> SS <del>AF</del> FF                    | 3798 |
| FUNGIVORUM      | LNPCDYYY-AMFQHANRAETDKQ-----TKH-AEGL <del>P</del> DL <del>L</del> RK <del>GL</del> F <del>AS</del> AS <del>AF</del> FF   | 3779 |
| HALBUM          | PPAGPLYQ-QMPHSDRADAIKK-----EKQ-HDKVP <del>AL</del> LR <del>NG</del> IWA <del>SS</del> PSHLF                              | 3934 |
| DPURPUREUM      | -SPGPLYQ-QMFIHANRDNAVKK-----EKQ-IAKVP <del>EL</del> LR <del>NG</del> IWA <del>SS</del> PSHLF                             | 3941 |
| PVIOLACEUM      | -AAGPLYQ-QMFIHANRDNAVKK-----DRQ-HARIP <del>ADL</del> LR <del>NG</del> IWA <del>SS</del> PSHLF                            | 3934 |
| AMPHIPOD        | ----LST-QDLLKQSKVDCVKA-----SEV-VNSLP <del>WD</del> LRRLS <del>ND</del> ASSY <del>SE</del> FFV                            | 3870 |
| SHRIMP          | ----ENY-TVAKKAKKRDVKA-----EEV-VNKIP <del>WD</del> LRRLV <del>RS</del> SSST <del>GE</del> FFS                             | 3841 |
| MUDCRAB         | ----EPW-NFRKKTDKRRVKK-----EDA-VNRIP <del>WD</del> LRRLV <del>RS</del> SSST <del>GE</del> FFS                             | 3832 |
| TARIGRADE       | ISEKDLNN-RAFLEVKPADMRKI-----QQV-TRLP <del>DL</del> LR <del>RQ</del> LR <del>Q</del> TV <del>SP</del> PA <del>LI</del> I  | 3889 |
| HYDRA           | ----VNS-NVYKSANRSETVKVP-----EDC-VSTVP <del>DL</del> LRRA <del>EK</del> TAL <del>SS</del> PA <del>FT</del> V              | 3736 |
| SALPINGOECA     | PSPLKMYH-SVMTKAKRSDISRS-----LER-QALVP <del>DL</del> LR <del>DAL</del> LH <del>ST</del> TP <del>PA</del> MT               | 3972 |
| SPIDER          | ENLASHMH-SFYMKKTRECEIQK-----EKI-VNFVP <del>DL</del> LR <del>KK</del> S <del>LK</del> SSSP <del>PA</del> MT               | 3863 |
| LIMULUS         | ----VSR-NAYRKLGRKETLKA-----QEV-VDLVP <del>SD</del> LR <del>R</del> AG <del>VK</del> SS <del>PA</del> MT                  | 3927 |
| SCORPION        | DKSTPLLY-ENIKYIAOTEVAKK-----TEC-DMIP <del>WD</del> LRRA <del>LK</del> SS <del>PA</del> MT                                | 3885 |
| ROTIFFER        | KTQSEVYG-MYAKYSRELICRE-----DKI-QNSIP <del>WD</del> LR <del>Q</del> FP <del>RT</del> SS <del>PA</del> MT                  | 3830 |
| CIONA           | -PPCETYG-VLMQRGSYAQVVEK-----KRA-ENMLP <del>WD</del> LR <del>Q</del> AV <del>IR</del> LA <del>Q</del> PS <del>VA</del>    | 3914 |
| OCTOPUS         | ----SGIM-NIFKCKKTDDELG-----QSI-CARIP <del>ODL</del> LR <del>RS</del> KK <del>MS</del> TS <del>PA</del> MT                | 3797 |
| CAPITELLA       | RQMIENYR-KCYQKYSRNETLNA-----KKR-EAMVP <del>WD</del> LR <del>R</del> KS <del>Q</del> K <del>AS</del> SS <del>PA</del> MT  | 3876 |
| LIMPET          | RCIKSMYQ-KVYQYNSRAETIKD-----RMK-ENKVP <del>WD</del> LR <del>RRA</del> HQ <del>MS</del> TS <del>PA</del> MT               | 3856 |
| SCALLOP         | LPLAKMYG-LMYQYKNTAEAREL-----RLK-ENKIP <del>WD</del> LR <del>RRA</del> HD <del>IS</del> TS <del>PA</del> MT               | 3945 |
| LINGULA         | PNICKKYW-GMYERCSRTEAVKSC-----QDK-ENSLP <del>WD</del> LR <del>RRA</del> LQ <del>MS</del> TS <del>PA</del> MT              | 3888 |
| OYSTER          | RDVQQGYM-QMYLYNMTETRREL-----QKK-ENIP <del>WD</del> LR <del>RRA</del> HK <del>MS</del> TS <del>PA</del> MT                | 3888 |
| SNAIL           | TDWGLIYG-QVYQYNSKTEMKEP-----RIK-ESKVP <del>WD</del> LR <del>RRA</del> QH <del>MS</del> TS <del>PA</del> MT               | 3895 |
| SPONGE          | -NYVNWYY-EMYKLLKADEVKKE-----RRI-VSAPV <del>WD</del> LR <del>RS</del> L <del>TS</del> D <del>AS</del> TS <del>PA</del> MT | 3933 |
| PRILAPULA       | ASHVKLYA-RTFVQCSKSDTVRS-----RER-ESMVP <del>DL</del> LR <del>Q</del> AL <del>R</del> SS <del>PA</del> MT                  | 3929 |
| DANIO           | VEGIRRYA-ELYKAKRDTVMN-----RRI-EQV <del>PD</del> DL <del>RRA</del> V <del>MS</del> TS <del>PA</del> MT                    | 3890 |
| ESHARK          | --DMFLRYP-TMYLKASRTETVTA-----RTH-EQAIP <del>CDL</del> LRRA <del>LK</del> SS <del>PA</del> MT                             | 3912 |
| BSHARK          | SDVTLYG-QMYMKASRTETVKA-----RQC-ERAVP <del>DL</del> LRRA <del>TK</del> MS <del>TS</del> PA <del>MT</del>                  | 3905 |
| XENOPUS         | VGDARQHV-TSYTRCDRTNTVAS-----RER-EALVP <del>DL</del> LRRA <del>VK</del> MS <del>TS</del> PA <del>MT</del>                 | 3917 |
| STERLET         | EKGIAQYI-TMYKTAKRTETVRA-----RNV-EHV <del>PE</del> DL <del>LRRA</del> MK <del>MS</del> TS <del>PA</del> MT                | 3921 |
| GAR             | SKGQEYH-EVYKASRTEVTAN-----QSI-EKLPV <del>ODL</del> LRRA <del>IQ</del> SS <del>PA</del> MT                                | 3918 |
| HUMAN           | KHDVGAYM-LMYKGANRTEVTSP-----RKR-ESKVP <del>ADL</del> LRRA <del>VK</del> MS <del>TS</del> PA <del>MT</del>                | 3899 |
| PLATYPUS        | KQDFGAYM-LMYKHASRTEAVTAP-----RNR-ENRVP <del>CDL</del> LRRA <del>VK</del> MS <del>TS</del> PA <del>MT</del>               | 3906 |
| TASDEVIL        | KQDISAYM-LMYRRANRTEVITS-----RNR-ESKVP <del>ADL</del> LRRA <del>VK</del> MS <del>TS</del> PA <del>MT</del>                | 3911 |
| COELACANTH      | SVGPQRYG-SMYKASRTEVTMA-----RSV-ESLVS <del>RD</del> LRRA <del>TK</del> MS <del>TS</del> PA <del>MT</del>                  | 3918 |
| CAECILIAN       | CDNISRYE-YMYRRASYTETVVA-----KAR-ENLVP <del>GD</del> LRRA <del>TK</del> MS <del>TS</del> PA <del>MT</del>                 | 3914 |
| CANARY          | AQGISRYH-AMYRASRTEAVTSP-----KSR-ESSVP <del>ED</del> LRRA <del>VK</del> MS <del>TS</del> PA <del>MT</del>                 | 3907 |
| OSTRICH         | AGGVPRH-VMYRRANRTEVTMS-----KSR-ESSVP <del>ED</del> LRRA <del>VK</del> MS <del>TS</del> PA <del>MT</del>                  | 3877 |
| GECKO           | NAGLVNYY-SMYKASRTEVTSP-----QQR-ENLVP <del>ED</del> LRRA <del>VK</del> MS <del>TS</del> PA <del>MT</del>                  | 3917 |
| TURTLE          | ENGIARXK-TMYSRANRTEVTLS-----RNR-ETSVP <del>CDL</del> LRRA <del>VK</del> MS <del>TS</del> PA <del>MT</del>                | 3915 |
| ALLIGATOR       | IEDFARYM-PMYKASRTEVTMS-----RNR-ENRVP <del>ED</del> LRRA <del>VK</del> MS <del>TS</del> PA <del>MT</del>                  | 3875 |
| APLYSIA         | GNWQMMYD-RVMYKYSHTETVKE-----RLK-QGKIP <del>W</del> LR <del>RRA</del> Q <del>Q</del> SS <del>PA</del> MT                  | 3962 |
| TRICHOPLAX      | -GPVYMYQ-SMYRKAARSEVENH-----KFR-ENSVP <del>WD</del> LR <del>RG</del> V <del>AS</del> SS <del>PA</del> MT                 | 3905 |
| SOFTCORAL       | KHIINNYI-PMFKKASREVIERK-----REL-QNLMP <del>H</del> DAL <del>RRS</del> MR <del>AS</del> SS <del>PA</del> MT               | 3917 |
| STONYCORAL      | RNPSRFYG-EMFKKANRTETERS-----TQK-QALVP <del>WD</del> LRRA <del>LQ</del> AV <del>SP</del> PA <del>MT</del>                 | 3944 |
| SEA ANEMONE     | LTLRILFDIIISREANRDTSESE-----KKK-QAQVP <del>WD</del> LRRA <del>Q</del> AV <del>SP</del> PA <del>MT</del>                  | 3883 |
| SEACUKE         | EKIHLTFA-TMYKQAGLQETHN-----RQC-EBEIP <del>WD</del> LR <del>RKA</del> L <del>ES</del> SS <del>PA</del> MT                 | 3911 |
| LANCELET        | DPWGVYQ-SLYQKASRTDVTLA-----RQV-OSKV <del>TD</del> LR <del>RG</del> LQ <del>MS</del> SS <del>PA</del> MT                  | 3977 |
| STARFISH        | SNHGVRYG-AVYRHANYDVTVKC-----RSW-EALVP <del>WD</del> LR <del>RRA</del> I <del>Q</del> SS <del>PA</del> MT                 | 3966 |
| SEA URCHIN      | -NITKLP-EAYKKANETETIKA-----RER-EAKLP <del>WD</del> LR <del>RG</del> MO <del>SS</del> PA <del>MT</del>                    | 3947 |

Supplementary Figure 6 CLUSTAL OMEGA ALL PHYLA, EXPANDED

|                 |                                                                                                                       |      |
|-----------------|-----------------------------------------------------------------------------------------------------------------------|------|
| PARAMECIUM      | I RDK F L I V G I L A G V I L I G D R H L E F I L L N Y S N R L L I D F P S F S Q L L --- A L P I P E                 | 3789 |
| TETRAHYMENA     | L K E R I R V V V V V G V I L I G D R H L E F L A N Y S N G D I V S I D F G V S F G A L --- G L A V P E               | 4185 |
| STYLOCNCHIA     | L K N Q F T K L A F P F I S V L I G I G D R H L E F L I D T S D G E I L I D F G I A F G S I I --- Q L I P E           | 4057 |
| APHANOMYCEsa    | L R E S A T L A F A F N G S V L I G I G D R H L D N F L D E R T A V V G I D F G I S F G A A --- S L L P V P E         | 3606 |
| APHANOMYCEse    | L R E T S T S L A F A F N G S V L I G I G D R H L D N F L D Y I T Q T V V G I D F G I S F G S A --- S M L P V P E     | 3529 |
| PYTHIUM         | I R D Q F A S L I G V F S A S V I L I G D R H L D N F L D H Q T G R V I G I D F G V S F G A A --- S V L P V P E       | 3838 |
| PLASMOPARA      | V R D N L K S L A V F S A S V I L I G D R H L D N F L D L G S G R V I G I D F G V S F G A A --- S V L P V P E         | 3802 |
| BREMIA          | V R D H L K S L A V F S A S V I L I G D R H L D N F L D L S S G R V I G I D F G V S F G A A --- S V L P I P E         | 3785 |
| AEDDES          | L R G N F A K S L A M A V V C W I L I G D R H T S N V L D R S N G L A G V D F G I A F G A T --- R D I P I P E         | 3836 |
| MIDGE           | L R Q N F I T S V M A M V H H I L I G D R H M N I L D M K T G R L I D F G V A F G A T --- T L I P E                   | 3854 |
| BOMBUS          | M R R N I T S V M T M I H I L I G D R H L E M F L V D S G R C L I D F G L A D A V --- D R I P E                       | 3682 |
| ANT             | L R R N V T T M T I H I L I G D R H L Q M F L V O A T G R I G I D F S A F G S I --- R A P I P E                       | 3760 |
| WHIPWORM        | L R E R V A L L A L V V T V L I G D R H L D N I L D T S M E L L I D F G Y A F G S L --- Q L L P I P E                 | 3804 |
| TRICHIANELLA    | L R Q K T V L L S M L I N L L I G D R H L G I V L D P K T E V I D F G Y A F G A L --- Q Y L P I P E                   | 3810 |
| BEE TLE         | L R N N I K Y N I M C A S H I V V G D R H L S S L V C L N S G K V L I D F G H A F G T D --- Q I L P V P E             | 3649 |
| BARNACLE        | L R T R M A E S H L L A G L L V G D R H L G F L V S L E D G A M I G I D F G H V F G S N T --- S L L P V P E           | 3703 |
| THRIP           | L R H S I T S V T L I H I L I G V D R H L Q C L V S Q T N Q C I G I D F G H V F G S N T --- L N L P V P E             | 3744 |
| FLEA            | L R H N P A T S Y G I M I H I L I G I G D R H L S N C L I N I N S G F A V G I D F N C A F G S V --- M T L P I P E     | 3735 |
| WHITEFLY        | M R N E L C S Y V M I G H I L I G I G D R H L S M L V N L F T G K C L I D F G H A F G S N T --- Q I L P V P E         | 3824 |
| TICK            | L R S R F V L S H T L V H V L V G D R H L G F L V S T N T G L E I G I D F G Y A F G L A --- Q F L P I P E             | 3757 |
| TERMITE         | L R Q S F A C S V V L I H I L I G I G D R H L S N I L V S V K D G R C V I D F G S A F G T T --- Q F L P V P E         | 3828 |
| DAPHNIA         | L R N R L A T S H Q T Q L L A I L I G V D R H L S F L V S T K N G I D I G I G M A F G M T --- S Q L P V P E           | 3510 |
| OSTREOCOCCUS    | M R Q A A A S S S I G V A V G D R H L D M I L D L S T Q L V H I D F G Y A F G T T --- S A L P I P E                   | 3781 |
| STENTOR         | L R Q I T E R P A L I G I I L I G I G D R H L E M F L S D S G L I G I D F G V S F G S V --- G H L P E                 | 3472 |
| KLEBSORIDIUM    | L R Q C A R L A L A T I G V A V G D R H L Q F L D V A D F T L I G I D F S Y S F G T T --- Q M L P V P E               | 4134 |
| CLUBMOSS        | M R S Q A R L S V M L G C I A V G D R H L A T L I D M Q T S I A N I D F G Y S F G T V --- I L L P V P E               | 3745 |
| MOSS            | L R S Q A R L S V T R L G C V A V G D R H L G T L V D M R T G A L V E I D F G Y S F G T V --- L L L P V P E           | 3912 |
| LIVERWORT       | L R S Q A K L S V I S I G V A V G D R H L A T L V D M R T G A L V E I D F G Y S F G T V --- I L L P V P E             | 3977 |
| LIGNANO         | M R D T L V R S H A M G H W L L S V G D R H M S N Y M L C L D S G K M I G I D F G Y A F G T I --- T F L P T P E       | 4231 |
| COPEPOD         | I R K N I T S V M L V M Q I L I G I G D R H L S N Y L V C Q K T G R V V I D F G Y A F G I S T --- S F L P I P E       | 3708 |
| GLOBOSUM        | I R G E P A N S P A L I G S V L I G I G D R H L D N F L V N L K N G K I V G I D F G H A F G S N T --- E V L P I P E   | 3715 |
| PALUSTRIS       | I R A Q F A K S L A T L A I G S V L I G I G D R H A E N F L D M T T G Q I V G I D F G H A F G S N T --- E V L P I P E | 3780 |
| NEOCALLIMASTIX  | I R N E V A N S L A I I G S V I L I G I G D R H L E F L V N K N S Q L I G I D F G H A F G T T --- E V L A I P E       | 3887 |
| GLOMUS          | I R S E I K H W I L I G I L I G I G D R H L E F L V D T T K G S L I G I D F G H A F G S N T --- E T L P I P E         | 3898 |
| LOBOSPOR        | L R S E P T R S L A I H V G S V I L I G D R H L E F L D M S S G C L I P I D F G H A F G S N T --- E V L P V P E       | 3874 |
| SYNCEPHALASTRUM | I R N G A N S L A V T I S G V L I G D R H L E M F L D L S K S R L V H I D F G H A F G S N T --- E Q L P V P E         | 3856 |
| FUNCTIVORUM     | L R S Q A K L S V F S I G I L I G I G D R H L E M F L S T G S L I G I D F G H A F G T T --- Q F L P I P E             | 3837 |
| HALBUM          | L R N S A R L D F P F I S V I L I G D R H L E F L I S Q D R I L I G I D F G H A F G T T --- Q F L P I P E             | 3992 |
| DUPURPUREUM     | L R N S A R L D F P F V S V I L I G D R H L E F L I S Q D R T L I G I D F G H A F G T T --- Q F L P I P E             | 3999 |
| PVIOLACEUM      | L R N S A R L A F A F I S S V I L I G I G D R H L E F L I S Q D G R L I G I D F G H A F G T D --- Q F L P I P E       | 3992 |
| AMPHIPOD        | I R T K C S H V L I S I Q L L I G I G D R H L C N F L V D Y K T T M V G I D F G H H F G T T --- Q F L P L P E         | 3928 |
| SHRIMP          | L R S A A V S Y A L I S Q L L I G I G D R H C S N S L V S L K T G R V I G I D F G H H F G S A V --- Q F L P V P E     | 3899 |
| MUDCRAB         | L R S L P A N S Y M V M V H I L I G I G D R H C G M T V S L K T G R V V G I D F G H H F G T V --- Q V L P P P E       | 3890 |
| TARDIGRADE      | V R N L P A Q F G V M I G I Q V L I G I G D R H L S N C M V S T E T G L F I D F G H A F G S V --- Q S L P I A E       | 3947 |
| HYDRA           | L R K N I Q S H S C L I H I L I G I G D R H L N M L D N K T G V V G I D F G Y A F G I T --- Q L L K Y P E             | 3794 |
| SALPINGOBECA    | I R Q L G R L A T M M I G I Q I L I G I G D R H L S N S M I D L R T G V V G I D F G H N F G S N T --- Q E L P I P E   | 4030 |
| SPIDER          | L R T K A K S H V I L I G I Q I L I G I G D R H L G F L I D K T S G C E T I D F G H A F G S N T --- Q F L P V P E     | 3921 |
| LIMULUS         | L R S Q V I S H V L I S I Q L L I G I G D R H L G F L I K T D T G K E L I D F G H A F G S N T --- Q F L P V P E       | 3985 |
| SCORPION        | L R N I T E R V L I G I Q L L I G I G D R H G F L S T T T G I E I D F G H A F G T T --- Q F L P I P E                 | 3943 |
| ROTIIFER        | L R N E I K L V A V L G I L I G I G D R H L S N W M L K T R A L I D F L A F G T T --- M H I P V P E                   | 3888 |
| CIONA           | L R K R T S Y V M V V H H I L I G D R H L S N M L S L T T E V V G I D F G H A F G S N T --- E V L P V P E             | 3972 |
| OCTOPOUS        | L R T G T I I H V L L I G H I L I G V D R H L S L M I H Q G T Q M I D F G H A F G S N T --- Q Y L L I P E             | 3855 |
| CAPITTELLA      | L R G N C A T S H L N I S A Y I M G I G D R H L S N H M V D L I N G K M I D I D F G H A F G S N T --- Q F L P I P E   | 3934 |
| LIMPET          | L R C E L V V H T I S I Q Y F L I G I G D R H L S N F M I N L K T G M V G I D F G H N F G S N T --- Q F L P V P E     | 3914 |
| SCALLOP         | L R C T L A V S H M L V S I Q Y I L I G I G D R H L S N F M I N L K T G M I G I D F G H A F G S N T --- Q F L L I P E | 4003 |
| LINGULA         | L R R F A I S H L L I G H I L I G I G D R H L S N F M V D L E T G M I G I D F G H A F G S N T --- Q F L P V P E       | 3946 |
| OYSTER          | L R C K C A S H L L I G I Q V L I G I G D R H L S N F M I N L K N G E M V G I D F G H A F G S N T --- Q F L P I P E   | 3946 |
| SNAIL           | L R C E M L T S H V L I G H I L I G I G D R H L S N F M V N G R T G H M V G I D F G H A F G S N T --- Q F I P V P E   | 3953 |
| SPONGE          | L R C T I Q S L S V I L I G I Q I L I G I G D R H L S N F M V M E T G Q L V G I D F G H A F H S N T --- Q F L P L P E | 3991 |
| PRIAPULA        | L R T H I R S H M L V H I V V V G D R H L S N F M V S Q E D G M V G I D F G H A F G S H P R C C L P I P E             | 3989 |
| DANTO           | L R S H S S H V L I S I Q L L I G I G D R H L S N F M I N T E T G M I G I D F G H A F G S N T --- Q F L P V P E       | 3948 |
| ESHARK          | L R S H A S H M L I S H I L I G I G D R H L S N F M W L E T G M I G I D F G H A F G T T --- Q F L P V P E             | 3970 |
| BSHARK          | L R S H A S H M L V S H I L I G I G D R H L S N F M I N L E T G M V G I D F G H A F G S N T --- Q F L P V P E         | 3963 |
| XENOPUS         | L R S H A R S H L L V S H I N G I G D R H L S N F M I N M E T G M I G I D F G H A F G T T --- Q F L P V P E           | 3975 |
| STERLET         | L R S H T C S H M L V S H I L I G I G D R H L S N F M I N M E T G M V G I D F G H A F G S N T --- Q F L P V P E       | 3979 |
| GAR             | L R S H A S H L I S V S H I L I G I G D R H L S N F M V N M E T G M V G I D F G H A F G S N T --- Q F L T V P E       | 3976 |
| HUMAN           | L R S H A S H L I S I H I L I G I G D R H L N F M V A M E T G V I G I D F G H A F G S N T --- Q F L P V P E           | 3957 |
| PLATYPUS        | L R S H A R S H L L V S H I L I G I G D R H L S N F M I N L E T G M V G I D F G H A F G S N T --- Q F L P V P E       | 3964 |
| TASDEVIL        | L R S H A S H M L M I S H I L I G I G D R H L S N F M I N M E T G M I G I D F G H A F G S N T --- Q F L P V P E       | 3969 |
| COELACANTH      | L R S H A S H M L I S H I L I G I G D R H L S N F M I N M E T G M V G I D F G H A F G S N T --- Q F L P V P E         | 3976 |
| CAECILIAN       | L R S H A S H M L I S H I L I G I G D R H L S N F M I N M E T G M V G I D F G H A F G S N T --- Q F L P V P E         | 3972 |
| CANARY          | L R S H A S H M L I S H I L I G I G D R H L S N F M I N K E T G M V G I D F G Y A F G A T --- Q F L P V P E           | 3965 |
| OSTRICH         | L R S H A S H M L I S H I L I G I G D R H L S N F M I N K E T G M V G I D F G H A F G S N T --- Q F L P V P E         | 3935 |
| GECKO           | L R S H A S H M L I S H I L I G I G D R H L S N F M I N M E T G M V G I D F G H A F G S N T --- Q F L P V P E         | 3975 |
| TURTLE          | L R S H A S H M L M I S H I L I G I G D R H L S N F M I N M E T G M V G I D F G H A F G S N T --- Q F L P V P E       | 3973 |
| ALLIGATOR       | L R S H T S H L L I S H I L I G I G D R H L S N F M I N T E T G I L I D F G Y A F G S N T --- Q M L P V P E           | 3933 |
| APLYSIA         | L R T S L V T H T L L Q V L L I G I G D R H L S N F M V S L K T G H M I D F G H A F G T T --- Q F L P V P E           | 4020 |
| TRICHOPLAX      | L R S H A R H I V V I S I H I L I G I G D R H L S N F M I D R L T G M I G I D F G H A F G S N T --- Q F L P L P E     | 3963 |
| SOFTCORAL       | L R A Y A R Y C M I G H I L I G I G D R H L S N S M V D L Q G R V I G I D F G H A F G S N T --- Q F L P L P E         | 3975 |
| STONYCORAL      | L R S H A S H M C L I Q Y I L I G I G D R H L S N F L V D M E T G M I G I D F G H A F G S N T --- Q F P L P E         | 4002 |
| SEA ANEMONE     | L R T H A R S H C I C I Q V L I G I G D R H L S N F L V D M R T G L I G I D F G H S F G S N T --- Q F L P V P E       | 3941 |
| SEA CUCUR       | L R T H A K S F N L I Q Y I L I G I G D R H L S N F L S L N S G R M I G I D F G H A F G S N T --- L I L P I P E       | 3969 |
| LANCELET        | L R S H T T H L L I Q V L I G I G D R H L G F M I D L S G M V G I D F G H A F G S N T --- Q H L P V P E               | 4035 |
| STARFISH        | L R S H A R S H V I L I Q Y I L I G I G D R H L S N F L I S L K T G M I G I D F G H A F G S N T --- Q F L P V P E     | 4024 |
| SEA_URCHIN      | L R A H E A R S H V L I Q Y I L I G I G D R H L S N F L S L E T G M V G I D F G H S F G S N T --- Q F L P I P E       | 4005 |

: : : : : \* \* \* \* \* \* : : : \* : \* : \* : \* \* : \* : \* : \* : \* : \*

Supplementary Figure 6 CLUSTAL OMEGA ALL PHYLA, EXPANDED

|                 |                                                                 |      |
|-----------------|-----------------------------------------------------------------|------|
| PARAMECIUM      | LMPRLRQVPEGLAKPIG--LGGLVKSQFVKIMSALRKKRHHLLDFCVFIIQPLIEGIIK     | 3847 |
| TETRAHYMENA     | LMPRLRQVPEGLAKPIG--INGIQRQSMISSMMALKKKRHHLLDFCVFIIQPLIEGIIK     | 4243 |
| STYLYONCHIA     | LMPRLRQVPEGLAKPIG--LEGVYKOTMVHAINALKRRKSLMDTCLIFVKEPLLDVVK      | 4115 |
| APHANOMYCEsa    | LVPFRYKQIRGVLPQHD--ASLLQDQAAVLDALRQQQQRDSVVRVFLNEPLLEQV         | 3664 |
| APHANOMYCEsa    | LVPFRYKQIRGVLPQHD--AKLLFQDAAVLEALRQQHQRQESVSVFLNEPLLEQV         | 3587 |
| PYTHIUM         | LIPFRYRQMEAVLPQYD--GNSLLIQDQAVFEALREKKQVIESVMNVFLHDPILLDQO      | 3896 |
| PLASMOPARA      | LIPFRYRQMEAVLPQYD--GNSLLIQDQAVFEALREKKQVIESVMNVFLHDPILLDQO      | 3860 |
| BREMIA          | LIPFRYRQMEAVLPQYD--GANLVQDQAVFDALRSKRQVIESVMNVFLHDPILLDQO       | 3843 |
| AEDDES          | MVPRRLRQVPEGLAKPIG--TSGMMSKCMVYTRCLRDRSKRLRSCLOVFRBPTVDGLE      | 3894 |
| MIDGE           | LVPRLRSHVNVVEPLG--VNGMKRKNMNVHRCFRHFSQTLICLEMVFRBPTVDGLE        | 3912 |
| BOMBUS          | LMPRLRQVPEGLAKPIG--EKDLKRTIHTLQAVRNQDQPLSCSDVYVHEP-LMTE         | 3739 |
| ANT             | LVPRLRSHVNVVEPLG--ERDFLATIHTHARALRNDQDQPLACMDIYVHKP-IRSF        | 3817 |
| WHIPWORM        | LMPRLRQVPEGLAKPIG--VNGLLRSSMWNFLRSIRDNQGLLLNANDVFIKQPSLDVTR     | 3862 |
| TRICHIANELLA    | LMPRLRQVPEGLAKPIG--MHGLESTMYKYLKAFRDSYVILLNMDVFIKQPSLDVTR       | 3868 |
| BEEFLE          | LVPRLRSHVNVVEPLG--ATGLFRIMVHCLRSLSNSASLLSTMVVFRBPTVDGLE         | 3707 |
| BARNACLE        | LVPRLRQVPEGLAKPIG--PAGLRHTLLRAVRLRSSRHLAAALQVFRBPAQVTE          | 3761 |
| THRIP           | LIPRLRPHIVVLPQHD--TKGLIQTVMVHALRALRADPEILLATMVVFIKQPSLDVTR      | 3802 |
| FLEA            | LIPRLRPHIVVLPQHD--AFGLIQRVMVHALRALRADPEILLATMVVFIKQPSLDVTR      | 3793 |
| WHITEFLY        | LIPRLRPHIVVLPQHD--EFGLIRESMVSALKCKDNQHVLLATMVVFIKQPSLDVTR       | 3882 |
| TICK            | LMPRLRQVPEGLAKPIG--KEGFLASAMQDALRALRAGAESLIDLVVFOEPTVDVNR       | 3815 |
| TERMITE         | LMPRLRPHIVVLPQHD--ETGLFRETMIHCLRTLRNNYDMLLATMVVFIKQPSLDVTR      | 3886 |
| DAPHNIA         | VVPCRLRQVPEGLAKPIG--LNGSVRDSMVHTLRVAKAESGSIILAAISVFIKQPSLDVTR   | 3568 |
| OSTREOCOCCLUS   | LVPRLRSHVNVVEPLG--ARTWLEPTMARTVKALRNGSLLKGVMDVFIKQPSLDVTR       | 3839 |
| STENTOR         | LMPRLRQVPEGLAKPIG--PQGLERKOSMILICLAKRKHSLIDCLCVFRBPTVDGLE       | 3530 |
| KLEBSORMIDIUM   | LVPRLRQVPEGLAKPIG--ETDLKIDMTVRVTVLRENKQVLAVMVFIKQPSLDVTR        | 4192 |
| CLUBMOSS        | LIPRLRQVPEGLAKPIG--SLGLLKNMVRVLSALHKSQRQICAVMDVFRBPTVDGLE       | 3803 |
| MOSS            | LVPRLRQVPEGLAKPIG--AVGLLRSDMVRIMTALRGRSLISAVMVFVKEPLVDVQK       | 3970 |
| LIVERWORT       | LIPRLRQVPEGLAKPIG--ALGLRDTMVHTLAALHARREVLISAVMDVFRBPTVDGLE      | 4035 |
| LIGNANO         | LVPRLRQVPEGLAKPIG--PSQGFVRCGLGCLALRRERELVLSQVFIKQPSLDVTR        | 4290 |
| COPEPOD         | LVPRLRQVPEGLAKPIG--THGLFRETVMVQVLRCLREHPEMLISALNTVLOEPTLDVTR    | 3766 |
| GLOBOSUM        | LVPRLRQVPEGLAKPIG--VQNLNVHPMNTLAAIEEKDGLINALNFIKQPSLDVTR        | 3773 |
| PALUSTRIS       | LVPRLRQVPEGLAKPIG--IPVLEPYMIVNLTALRNRKQVLLANLFIKQPSLDVTR        | 3838 |
| NEOCALLIMASTIX  | MVPRRLRQVPEGLAKPIG--ISVLEIPMIYITVLRNENSIILANLFIKQPSLDVTR        | 3945 |
| GLOMUS          | LIPRLRQVPEGLAKPIG--SKGLEYPMIKILQIMANKDILLNMDVFRBPTVDGLE         | 3956 |
| LOBOSPOR        | LAPRLRQVPEGLAKPIG--TKGLEHPMVCIKALAKKQVILLNMDVFRBPTVDGLE         | 3932 |
| SYNCEPHALASTRUM | LVPRLRQVPEGLAKPIG--VTGLEPTMTHIKAFRSEKSLLLNMDVFIKQPSLDVTR        | 3914 |
| FUNCTIVORUM     | LMPRLRQVPEGLAKPIG--ADGFLKMTVYTLALRKHKSKKILLNMDVFIKQPSLDVTR      | 3595 |
| HALBUM          | LMPRLRQVPEGLAKPIG--SVGLLSHNHTHTLAIHNNKDFLLSTMDVFRBPTVDGLE       | 4050 |
| DPURPUREUM      | LMPRLRQVPEGLAKPIG--SVGLLNNHTYLSALSHKDKILLNMDVFRBPTVDGLE         | 4057 |
| PVIOLACEUM      | LMPRLRQVPEGLAKPIG--SVGLLNSMTYTLGALSHKDKILLNMDVFRBPTVDGLE        | 4050 |
| AMPHIPOD        | LMPRLRQVPEGLAKPIG--TKGLIRESMVSALQALVSNKVVILAAVFAVKEPTVDGLE      | 3986 |
| SHRIMP          | LMPRLRQVPEGLAKPIG--QVGMLEKIMVSALGALRSHRVILTALEAVKEPTVDGLE       | 3957 |
| MUDCRAB         | LMPRLRQVPEGLAKPIG--PVGMKIDMVAVLGLRSHRVILTALEAVKEPTVDGLE         | 3948 |
| TARDIGRADE      | LAPRLRQVPEGLAKPIG--VKGLLQOTMVHAMRALRAERQVILLATMVVFIKQPSLDVTR    | 4005 |
| HYDRA           | LVPRLRQVPEGLAKPIG--DVSPYKQSMIVVLAQALQHSKMLISTMDVFIKQPSLDVTR     | 3852 |
| SALPINGOBECA    | MIPFRYKQIRGVLPQHD--KEGLVQEVMMVHVRALRANQVILLSTMDVFIKQPSLDVTR     | 4088 |
| SPIDER          | LVPRLRQVPEGLAKPIG--VKGIVYATMIHALKAIKTRKRDILLNMDVFIKQPSLDVTR     | 3979 |
| LIMULUS         | LIPRLRQVPEGLAKPIG--EKGLYEATMIHTMALRKHNDILLNMDVFIKQPSLDVTR       | 4043 |
| SCORPION        | LVPRLRQVPEGLAKPIG--EKGLYEATMIHALRKHNDILLNMDVFIKQPSLDVTR         | 4001 |
| ROTIFFER        | LVPRLRQVPEGLAKPIG--QRLGESSMVICLALRENNDLVCLLDVFIKQPSLDVTR        | 3946 |
| CIONA           | LVPRLRQVPEGLAKPIG--AHGELRHVMVRCLSALRSRTDILLPLDVVFIKQPSLDVTR     | 4031 |
| OCTOPOUS        | LIPRLRQVPEGLAKPIG--TKGLFERTMVHCLRESLRSKDKILLNMDVFIKQPSLDVTR     | 3913 |
| CAPITTELLA      | LIPRLRQVPEGLAKPIG--EKGVIEGTMVHSLRALRKHOKLISTMDVFIKQPSLDVTR      | 3992 |
| LIMPET          | LMPRLRQVPEGLAKPIG--IKGLIENMIHTLALRQDYDLVLLNMDVFIKQPSLDVTR       | 3972 |
| SCALLOP         | LMPRLRQVPEGLAKPIG--VKGLESTMVHARALRREDYDILLATMVVFIKQPSLDVTR      | 4061 |
| LINGULA         | LMPRLRQVPEGLAKPIG--EKGLESTMVHARALRREDYDILLATMVVFIKQPSLDVTR      | 4004 |
| OYSTER          | LIPRLRQVPEGLAKPIG--VHGLMESTMIHTLALRNNCDLLNMDVFIKQPSLDVTR        | 4004 |
| SNAIL           | LMPRLRQVPEGLAKPIG--VKGLENTMIHTLALRNNCDLLNMDVFIKQPSLDVTR         | 4011 |
| SPONGE          | LMPRLRQVPEGLAKPIG--VSGQLRSCMIHTLALRHSPTLLNMDVFIKQPSLDVTR        | 4049 |
| PRIAPULA        | LMPRLRQVPEGLAKPIG--LPHGQRNGLLYQTMVHTLALRDNHRLILLNMDVFIKQPSLDVTR | 4049 |
| DANTO           | LMPRLRQVPEGLAKPIG--ESGLIYSVMVHSLRAYRSDPDLNMDVFIKQPSLDVTR        | 4006 |
| ESHARK          | LMPRLRQVPEGLAKPIG--ESGLIYSVMVHSLRAYRSDPDLNMDVFIKQPSLDVTR        | 4028 |
| BSHARK          | LMPRLRQVPEGLAKPIG--ESGLIYSVMVHSLRAYRSDPDLNMDVFIKQPSLDVTR        | 4021 |
| XENOPUS         | LMPRLRQVPEGLAKPIG--DSGLPDSVMVHSLRAYRSDPDLNMDVFIKQPSLDVTR        | 4033 |
| STERLET         | LMPRLRQVPEGLAKPIG--ESGLIYSVMVHSLRAYRSDPDLNMDVFIKQPSLDVTR        | 4037 |
| GAR             | LMPRLRQVPEGLAKPIG--VSGLISSVMHARALRAYRSDPDLNMDVFIKQPSLDVTR       | 4034 |
| HUMAN           | LMPRLRQVPEGLAKPIG--ETGLIYSVMVHARALRAYRSDPDLNMDVFIKQPSLDVTR      | 4015 |
| PLATYPUS        | LMPRLRQVPEGLAKPIG--ESGLIYSVMVHARALRAYRSDPDLNMDVFIKQPSLDVTR      | 4022 |
| TASDEVIL        | LMPRLRQVPEGLAKPIG--ETGLIYSVMVHARALRAYRSDPDLNMDVFIKQPSLDVTR      | 4027 |
| COELACANTH      | LMPRLRQVPEGLAKPIG--EQGLIYSVMVHARALRAYRSDPDLNMDVFIKQPSLDVTR      | 4034 |
| CAECILIAN       | LMPRLRQVPEGLAKPIG--ESGLIYSVMVHARALRAYRSDPDLNMDVFIKQPSLDVTR      | 4030 |
| CANARY          | LMPRLRQVPEGLAKPIG--EWGLIYSVMVHARALRAYRSDPDLNMDVFIKQPSLDVTR      | 4023 |
| OSTRICH         | LMPRLRQVPEGLAKPIG--EWGLIYSVMVHARALRAYRSDPDLNMDVFIKQPSLDVTR      | 3993 |
| GECKO           | LMPRLRQVPEGLAKPIG--ETGLIYSVMVHARALRAYRSDPDLNMDVFIKQPSLDVTR      | 4033 |
| TURTLE          | LMPRLRQVPEGLAKPIG--ESGLIYSVMVHARALRAYRSDPDLNMDVFIKQPSLDVTR      | 4031 |
| ALLIGATOR       | LMPRLRQVPEGLAKPIG--ESGLIYSVMVHARALRAYRSDPDLNMDVFIKQPSLDVTR      | 3991 |
| APLYSIA         | LVPRLRQVPEGLAKPIG--VKGQESSMCHVLRALRSDPDLNMDVFIKQPSLDVTR         | 4078 |
| TRICHOPLAX      | LMPRLRQVPEGLAKPIG--ENGQLKCSMVHTLALRKNPDLNMDVFIKQPSLDVTR         | 4021 |
| SOFTCORAL       | LMPRLRQVPEGLAKPIG--VSGLOSTMVYTRALRNNHILLNMDVFIKQPSLDVTR         | 4033 |
| STONYCORAL      | LMPRLRQVPEGLAKPIG--KSGTLOSVMHTLALRNNHILLNMDVFIKQPSLDVTR         | 4060 |
| SEA ANEMONE     | LVPRLRQVPEGLAKPIG--ESGLVRYNMIHVMRALRNNHILLNMDVFIKQPSLDVTR       | 3999 |
| SEACUCU         | LMPRLRQVPEGLAKPIG--IDGLKNTMVHCLRALRNNHILLNMDVFIKQPSLDVTR        | 4027 |
| LANCELET        | LMPRLRQVPEGLAKPIG--ESGLIYSVMVHARALRAYRSDPDLNMDVFIKQPSLDVTR      | 4093 |
| STARFISH        | LMPRLRQVPEGLAKPIG--KEGLIYSVMVHTLALRNNHILLNMDVFIKQPSLDVTR        | 4082 |
| SEA_URCHIN      | LIPRLRQVPEGLAKPIG--IDGVLQSTMVHTLALRNNHILLNMDVFIKQPSLDVTR        | 4063 |

Supplementary Figure 6 CLUSTAL OMEGA ALL PHYLA, EXPANDED

|                 |                                                              |      |
|-----------------|--------------------------------------------------------------|------|
| PARAMECIUM      | IGKNKGMSEDFRQLEE----QSKI-EEQVY-----NRTGDSPSMISQDQKIK         | 3891 |
| TETRAHYMENA     | LTKDKKMGTIMFSENIG--HLDSTKTYNAEQ-----SQSQOQVGLSTMEASQIA       | 4290 |
| STYLONCHEIA     | DAKQKQKNGEN--NDNG--MVDSLISE-----YEEELQE                      | 4145 |
| APHANOMYCEsa    | QSKTKSKAQ-----QKETPDGDEAAAA                                  | 3686 |
| APHANOMYCEse    | TVKKKSRRD-----K---DQKDENAS                                   | 3605 |
| PTHUIM          | STTTTHQREIFETNQEVTQEVE-DVAMEVEEVVKPSKRQKRSTMTPTSSSSSSGGQTATT | 3955 |
| PLASMOFARA      | SIKIKQKVLFKKIVNVDLHTSHDSNAVKDVFETFA-PTRES--QSRKKASTLPATGNLT  | 3916 |
| BREMIA          | STAMHQKVLVFESVTEGDTSTFHDSDAEMEDVQESA-DFR-----SNKNGTASTARGIAN | 3896 |
| AEDES           | AAQRRFVQEEA-----KPE                                          | 3908 |
| MIDGE           | GSKMKKNLEMA-----NVSMGI                                       | 3929 |
| BOMBUS          | HLNKALESSE-----DVID                                          | 3754 |
| ANT             | SINDDEIMKDD-----NDID                                         | 3832 |
| WHIPWORM        | EALKQTK-----LSDSSSAEGR                                       | 3879 |
| TRICHINELLA     | FARRQIGERT-----LWNDEANLRDS                                   | 3890 |
| BEETLE          | HASRFSTGV-----DTSN                                           | 3720 |
| BARNACLE        | HQQQPA-----                                                  | 3767 |
| THRIP           | LAKKHWESEEN-----AN                                           | 3816 |
| FLEA            | PIKMYVRSSENE-----ALNYTDSISSIVEN                              | 3820 |
| WHITEFLY        | NAHRLAQKQSGES-----DGS-KRSRNYFKDA                             | 3908 |
| TICK            | LAKRQQAQSSPQ-----AS-KRQRGAREVS                               | 3839 |
| TERMITE         | FASRHESLN-----KKSHEES                                        | 3902 |
| DAPHNIA         | EAEKMTENRFOA-----TPTKES                                      | 3586 |
| OSTREOCOCCLUS   | EALVASESSK-----                                              | 3849 |
| STENTOR         | PLKTSYI-----VSEE                                             | 3541 |
| KLEBSORIDIUM    | ESLKRRAALGAKGRK-----GAVANLRDGED--EQMEVL                      | 4225 |
| CLUBMOSS        | EAARTASIRG-----GEEESH                                        | 3819 |
| MOSS            | EAVKLQARARADVSK-----STALEADAGANH--HMAAFS                     | 4003 |
| LIVERWORT       | EAMKTSNFR-----DRKGA--EMESTF                                  | 4057 |
| LIGNANO         | LAGMLTAAHRESSAAWDTSEHRAG-----SKSASASSAAAGGSSIASFSCP          | 4337 |
| COPEPOD         | SANLEARNKKIK-----KKEEDH                                      | 3784 |
| GLOBOSUM        | FAKLQMQRQGGTV-----AISSM-SDSLAA                               | 3798 |
| PALUSTRIS       | FALSOAQKQKTSQ-----DTSGSSENILNP                               | 3864 |
| NEOCALLIMASTIX  | FALRQAQKQKIKPKEEE-----ESINTLEP                               | 3970 |
| GLOMUS          | RANDQAQKQKDRNSNE-----IGEGDSQT                                | 3980 |
| LOBOSPOR        | YATNQAKEQKRRGADM-----DSFEDDSIAP                              | 3960 |
| STYCEPHALASTRUM | RAMSQANHKRDRNSQGS-----PASDISSVTSSDAE                         | 3946 |
| FUNGIVORUM      | LAKRVAKDQGGD-----DSS                                         | 3910 |
| HALBUM          | LASRLGKEQGGK-----HKS-V                                       | 4066 |
| DPURPUREUM      | LANRLVKEQGGK-----PKDTK                                       | 4074 |
| PVIOLACEUM      | LANRLVKEQGGK-----PKDTK                                       | 4067 |
| AMPHIPOD        | FVKLQEDV-----VDQEG                                           | 3999 |
| SHRIMP          | FVQKQEGD-----TQDSK                                           | 3970 |
| MUDCRAB         | FVRELEGN-----LDESK                                           | 3961 |
| TARDIGRADE      | AARKQSPDAD-----SQEE                                          | 4020 |
| HYDRA           | NAKKYESLALL-----KESS                                         | 3867 |
| SALPINGOECA     | QA-----RGD                                                   | 4093 |
| SPIDER          | LANKQKQTMGMP-----NEGK                                        | 3995 |
| LIMULUS         | WAQKQRN-EG-----KASEDAHD                                      | 4061 |
| SCORPION        | NALKQKRIKQKVDENVDS-----INIYPGNTESDDPNHSFCD                   | 4039 |
| ROTIFFER        | SAVKIAXKNLNE-----DMEITL                                      | 3964 |
| CIONA           | FGKRSRQDQRY-----SDSDVESSD                                    | 4052 |
| OCTOPUS         | NARNNMHRKAQD-----FSEED                                       | 3931 |
| CAPITELLA       | AAKKEIQAMSNR-----KEDTSKLTLD                                  | 4014 |
| LIMPET          | FAEKQRNEMLM-----TADDEE                                       | 3989 |
| SCALLOP         | NAEKQIQSLNLG-----D--SLEVEN                                   | 4080 |
| LINGULA         | FAEKQLQTTM-S-----QEDKED                                      | 4022 |
| OYSTER          | NAEKQMNEMK-V-----VSPEDE                                      | 4022 |
| SNAIL           | FAERQMRGGM-G-----KDADED                                      | 4029 |
| SPONGE          | NAKKQALAQ-----KINTDD                                         | 4064 |
| PRIAPULA        | TAERLADKDIHSN-----ESDQGEQV                                   | 4070 |
| DANTIO          | FELKQLKGGTW-----TESVNTKE                                     | 4026 |
| ESHARK          | LELKQMKKGGTW-----NKDVNTRE                                    | 4048 |
| BHARK           | FELKQLKKEGWSW-----SKDVNINE                                   | 4041 |
| XENOPUS         | LELKQMKKGGEW-----KKAVDVTS                                    | 4053 |
| STERLET         | FELKQMKKAGSW-----SEAVNTNE                                    | 4057 |
| GAR             | FELKQLKGGTW-----KETVNTKE                                     | 4054 |
| HUMAN           | FEQKMLKGGGSW-----IQEINVAE                                    | 4035 |
| PLATYPUS        | FETKMLKGGTW-----TRAVNTAD                                     | 4042 |
| TASDEVIL        | FEQKMLKGGGSW-----TREVNTME                                    | 4047 |
| COELACANTH      | FELKQLKGGGSW-----TKEVNTKE                                    | 4054 |
| CAECILIAN       | FMLKQLKKGQTW-----TKKVNTAE                                    | 4050 |
| CANARY          | FEQRQLKGGTW-----IKEINTSE                                     | 4043 |
| OSTRICH         | FEQRQLKGGTW-----IQEINTSE                                     | 4013 |
| GECKO           | FELKQLKGGTW-----FKQINME                                      | 4053 |
| TURTLE          | FELKQLKGGTW-----SKEVNTAE                                     | 4051 |
| ALLIGATOR       | FELRLKKGQTW-----LKEVNTCE                                     | 4011 |
| APLYSIA         | LAERQMNKEGES-----EDAED                                       | 4096 |
| TRICHOPLAX      | FANRQNAQGL-----KTESDD                                        | 4038 |
| SOFTCORAL       | FARKQAEKQKLN-----LNDMTD                                      | 4051 |
| STONYCORAL      | YARKQAKTQGI-----NEEEQK                                       | 4077 |
| SEA_ANEMONE     | FARKQAEQDQHE-----IGMYED                                      | 4018 |
| SEACUKE         | FADKTAQKQGL-----EISSD                                        | 4045 |
| LANCELET        | FAAKQMDKG-----MVGEDDLDD                                      | 4112 |
| STARFISH        | NASKQAQKQDAGRVLG-----QSDPDGNSLD                              | 4110 |
| SEA_URCHIN      | FAVKQADYQKLS-----EDSRD                                       | 4081 |

Supplementary Figure 6 CLUSTAL OMEGA ALL PHYLA, EXPANDED

|                 |                                                               |      |
|-----------------|---------------------------------------------------------------|------|
| PARAMECIUM      | FTWYPRKIDIVHKKLIGVHSLILLFDESRRH--QSA---RY--ADNLRKAIQ----      | 3939 |
| TETRAHYMENA     | DLMIHQRIIDIVKLLIGMNSHLFTELSSTRH--RTG---NY--FQHLKSALK----      | 4338 |
| STYLONCNCHIA    | LAWYPRKLEVMKDLNGLNVRIMAKELQDSKH--EKK---PY--FKVILNAIK----      | 4193 |
| APHANOMYCESa    | ATWMPQVKMDLARRKLRGEBVHLLCDELALNPN--VAA---V--LKLQATLP----      | 3733 |
| APHANOMYCESe    | SSWLPELKNQLOQRKLRGEBVHLLRELEQLNPH--IAS---V--YSHFDQIIP----     | 3652 |
| PYTHIUM         | LAWLPDVKVAIARRKLEGFSEKALLKELEAQNPH--LGK---Q--LKLFOALVD----    | 4002 |
| PLASMOPARA      | TAWLPNVKIAIARRKLEGVSEKALLKQELSONPH--IKQ---H--LNKYSLVN----     | 3963 |
| BREMIA          | AAWLPDIKIAIARRKLDGISKALLLKELESONSH--LTH---H--LSKFYALVD----    | 3943 |
| AEDDES          | LRWDPQARINMAVRKLANGAEKVLIAEELRIGQV--GCNRE--ILEGYKLL-----      | 3956 |
| MIDGE           | SDWNPEQRIAIVERKLRGEBVRRVKDEMSVSEI--AMNKO--LYDAYCNLA-----      | 3977 |
| BOMBUS          | VKWPFRKEAVFKLNGIKSLITLLEKLSQHH--DKYFD--RY--YAVITGDD----       | 3803 |
| ANT             | LIVSSKRHEIVAKKLNHISIIITLHLEKAHN--DEYFA--RY--CAIVTGDK----      | 3881 |
| WHIPWORM        | LSWYPKQKITVARRKLDGDESVIMEABL--SARQ--HTDNF--PLQQILCCIYGADEFFE  | 3934 |
| TRICHIANELLA    | FKWYPEEKISAARLRGDEVIIMQDELMSRR--HLSSP--PLHQIINCIIYGGKDFSA     | 3946 |
| BEETLE          | CDWYPAQKIEQARRKLAGANSVNIIMEDLAGHQ--KNQAY--MK---AYIALVE----    | 3768 |
| BARNACLE        | --EHARRVTRGRRLCGSHAAVCOELLAGAGR--LSAQE--VE---AWSAAAR----      | 3813 |
| THRIP           | PAWLVPVKHQAKKIKGTIVHLMREDESKIH--TVFKD--G----YKTLN-----        | 3862 |
| FLEA            | EQTMAHLKLRMARLKLQGSVHVLQDELKHSFV--STINE--IY--VNHIEKGM-----    | 3870 |
| WHITEFLY        | QDSFSLRHELEAWKLEGGHEIIMIKLEAGHK--TSPYL--DA--FKKILQ-----       | 3955 |
| TICK            | LDWFPKQKIVSROKLEGGHESYLRLDELKLRKT--NQPDF--AS--LELVCL--GAP---- | 3889 |
| TERMITES        | QTWYPOQKLDLAKLLEGANVITITTELEKAGFK--DSKYL--AK--F--LECVKGNH---- | 3952 |
| DAPHNIA         | TNWSPTQIVGRTDNLNGPHSVITCOOLENKI--FLTAGGQKL--LPQLIAVVR----     | 3638 |
| OSTREOCOCCLUS   | --SHLQSRITHEWGLKLELDNVEKLEASRQI--DR---SY--WTMCEBALV----       | 3995 |
| SPENTOR         | FADIPSKRHEIVAKKLRGEBVHLLRELEKSH--ANIS--NI--QDRIAEAVL----      | 3589 |
| KLBSORMIDIUM    | EOHVSLKLENAARKLARWNAEVTPLAQOSMV--NGK---PP--FRSLEGIVR----      | 4273 |
| CLUMBOSS        | EQQHVELKLENAQRKLDLWNAHVTLGELQSSVH--AGT---PW--MHATEAVAL----    | 3863 |
| MOSS            | EEHVQLKIVETAQCKLDLWNAEITISLELGSVH--ANK---PY--TRALEIIVR----    | 4051 |
| LIVERWORT       | EQQHVELKLENAQRKLELWNAEITIAELRSSVH--ARK---PY--SKALESIVR----    | 4105 |
| LIGNANO         | ERWFSKELQVVRQKLSGAEVCOELKSELDRH--RGK---PY--TSGMLAV--I----     | 4384 |
| COPEPOD         | REEFPKQKIVGTRRKLGVHESIIITCELELAGVD--KSD---W--LNKLVSAVE----    | 3830 |
| GLOBOSUM        | PEWYPKQKLEIARRKLDRENEFITADELKNHGE--KKK---W--YKNMRVTLM----     | 3845 |
| PALUSTRIS       | PEWYPOKLDIARRKLEGDNEPIYITTOLEWGHG--EKP---W--QAVRDVVM----      | 3911 |
| NEOCALLIMASTIX  | PKWYPKQKINIAERKLEGENSNLITTELENGHS--NTT---F--LRYLKEIVK----     | 4017 |
| GLOMUS          | VEWYPOKLDIARRKLELWNAEIVCSLEAGHS--NKP---W--FNSIKIAK----        | 4027 |
| LOBOSPOR        | PAMYLOQKMDIARRKLEGHEVYITVOELMNGHA--NKP---F--LAATKIAM----      | 4007 |
| STYCEPHALASTRUM | LAWYPRKLEIARRKLAGESVYIVAVTRNDSPHKA--A---I--DRLEBVLV----       | 3995 |
| FUNGIVORUM      | QAWFPKXKLEIAKKLQGENAHITALELKSVEH--ANA--PY--LPHLOQIVM----      | 3958 |
| HALBUM          | ESWFPKKEVDIARRKLERWNAEYITSELEANSVH--KGQ---IY--EKSQNVVK----    | 4114 |
| DPURPUREUM      | NVWFPKQKLIHAKKLDLYNAEYITLEELASVH--SNS---PY--EKNLQELIK----     | 4122 |
| PVIOLACEUM      | NEWFPKQKVALAKKLEMYNAEYITLEELAGSVH--NGL---AY--DSALQLITK----    | 4115 |
| AMPHIPOD        | IQSYSSMRKIKITKLDGVNHCIIIDW--MKNRR--IPQNV--K---SVLSKIIM----    | 4047 |
| SHRIMP          | VELFSSKRELLANDKLSDIWNAEYITLWVSNKFP--VAK--Q--KA--YENLKQAVL---- | 4019 |
| MUDCRAB         | IEMFSEERKCLKEKLTGFBAYVTWV--LSKNKA--VRRDP--TA--FEELKRVVL----   | 4011 |
| TARDIGRADE      | LLWYPREKIDTAERKLRGGNAFITRTVRSNTP--LKSQD--RL--LAKVEDACI----    | 4070 |
| HYDRA           | PDWYPKQKINICKOKLANGVNAEITSELENSFL--HTRD--QLL--LESYISVVE----   | 3917 |
| SALPINGOEA      | VALFAEQKIAVARRKLAGDNEAHITLSELESNRH--VTSDR--SW--HRKAKDIA----   | 4143 |
| SPIDER          | DDWFPKQKLLIARRKLEEFNHCYITRKELELGHG--MRP---C--FQNMVSVCI----    | 4042 |
| LIMULUS         | TQWYPKQKIVFAQKLRGHEVYITRKELELGHG--MRP---C--FQNMVSVCI----      | 4102 |
| SCORPION        | FWWYPKQKLEIARRKLAGESVYITRKELELGHG--NKP---I--FQRLTDVCL----     | 4086 |
| ROTIFFER        | GLQYAKRDNVSKKLPGMHESVIMRNDLCSGIH--KDS---KY--LQYVVDVLM----     | 4012 |
| CIONA           | RWVYARRKMAITKXKLEGENSITCDELELNHST--ITK---F--KSYCCIAS----      | 4099 |
| OCTOPUS         | LSWYPKKIDFVKKRLDGEBHAYITRDELNLNSH--VRKS--DA--LESITSIVL----    | 3980 |
| CAPITELLA       | SQWFPKKEVNVVRKLEGENSHVMRAELALQQL--GSY-----LKYFVIVLM----       | 4060 |
| LIMPET          | STWYPKQKIQYALRKFPGDNECHITKDELYLGHG--RSP---A--IKHFECVVL----    | 4036 |
| SCALLOP         | ITWYPKKIVHVKRKLGEHESYITRDELELGHG--KND---F--LRNFESVVM----      | 4127 |
| LINGULA         | AKWYPKQKIVAFARRKLAGANWCITRDELELGHG--RRG---KT--YQAFIA--I----   | 4068 |
| OYSTER          | VQWYPKKIEVVRKLRGDNVCSITRDELELGHG--KKP---A--FPALERVLQ----      | 4069 |
| SNAIL           | MRWYPKQKIEITAARRKLDGNEHYITRDELELGHG--RNQ---A--LKDFERVAL----   | 4076 |
| SPONGE          | NWYYPKKEVNICRKLKLGPNESHMLIDLEHGFK--NKP---E--FKYLGKILL----     | 4111 |
| PRILAPULA       | QEWYPKQKIVGARRKLEEFNHCYITRKELELGHG--RHE---A--LKQMTNVVL----    | 4117 |
| DANIO           | INWYPLQKIVNFAARRKLEGTNSVITSELELGFH--KMP---E--YKGLLAVAR----    | 4073 |
| ESHARK          | IHWYPMQKIVRYARRKLEGANAAITRDELOLGHE--TTE---A--YKSYVAVAM----    | 4095 |
| BHARK           | INWYPRQKIVNYARRKLEGANAAITRDELOLGHE--KSK---A--YASYVAVAM----    | 4088 |
| XENOPUS         | HNWHPQKILHCARRKLDGANACEITCELELGHG--SAP---E--YKDFIAVAR----     | 4100 |
| STERLET         | INWYPMQKIVNFAARRKLEGANAAITSELELGFH--KSP---A--YQSIIVAVQ----    | 4104 |
| GAR             | IDWYPRQKIVQARRKLEGANAAITSELELGFH--KES---W--CRAALAMAQ----      | 4101 |
| HUMAN           | KNWYPRQKICYARRKLAGANAAITCDELLGHG--KAP---A--FRDYVAVAR----      | 4082 |
| PLATYPUS        | TNWYPLQKIVYARRKLTGTNSVITCDELELGHG--KVP---A--FGDYISVAR----     | 4089 |
| TASDEVIL        | MNWYPLQKIVNYARRKLAGANAAITCDELLGHG--KVP---A--FECVSVAVQ----     | 4094 |
| COELOCANTH      | VNWYPVQKIVKGRKLEGVNHSVITCNELELGHG--KLS---A--YQSYLAVVK----     | 4101 |
| CAECILIAN       | KNWYAVQKIVNCARRKLAGTNSVITCDELELGHG--KSV---A--YKEMKAVAM----    | 4097 |
| CANARY          | VNWYPLQKIVNYARRKLTGANAAITCDELELGHG--RSP---A--YNDFAVAR----     | 4090 |
| OSTRICH         | VNWYPLQKIVNYARRKLTGANAAITCDELELGHG--RSP---F--FSDFAVAR----     | 4060 |
| GECKO           | VNWYPLQKIVNYARRKLAGANAAITSELELGHG--KSS---A--YRYVSVAR----      | 4100 |
| TURTLE          | INWYPLQKIVNCARRKLAGANAAITCDELELGHG--KSP---A--YKSYVAVQ----     | 4098 |
| ALLIGATOR       | VNWYPLQKIVNCVRRKLAGSAAITCDELELGHG--KSL---A--YRDYVAVAR----     | 4058 |
| APLYSIA         | DNWYPKQKIQFARRKLRGDEHYIMKELELALGHG--KRP---A--FKSLVNVLM----    | 4143 |
| TRICHOPLAX      | FSWYPREKIVTFARRKLAGANAFVTRDELRLCHH--LSI-----LESFAL----        | 4081 |
| SOFTCORAL       | LAWYPKKELNSAKRKLGEHAEIMKODESCHK--KAG---Y--YEEMLSVLL----       | 4098 |
| STONYCORAL      | ADWYPKQKIVQSAWRKLEGFHAYVMRDLQLGHS--KQS---W--YKQMESVCL----     | 4124 |
| SEA ANEMONE     | LTWYPREKIVLTAQRKLAGANAFVTRDELGHG--RRS---W--FRNLQSACL----      | 4065 |
| SEACUCIE        | ALWYPKERLLIAAKLEGANAAITRELEKSVH--GKS---TS--LQKFIIVR----       | 4093 |
| LANCELET        | ISWYPREKIKFAAKLQGVNHTHTKAELELGHG--NLP---W--FKSFCLVAM----      | 4159 |
| STARFISH        | ISWYPREKIVNFAQKLEGANSDITQRELELGHG--RNP---A--PSAIKEVVK----     | 4157 |
| SEA URCHIN      | ISWYPKKIKFAAKLQGVNHTHTKAELELGHG--SKDARDAP--FLKALKSTC----      | 4132 |

Supplementary Figure 6 CLUSTAL OMEGA ALL PHYLA, EXPANDED

|                 |                                                           |      |
|-----------------|-----------------------------------------------------------|------|
| PARAMECIUM      | -IINQNRLRHQY-----QKHOTLSVIGVNDCHLDLADPNILIRAVKIAEPI       | 3986 |
| TETRAHYMENA     | -EKPK-SIRNOY-----NEKQFLEVHEVNDCHLDLADPNILIRAVHIAEPI       | 4384 |
| STYLNONCHIA     | -SQES-SIRYKLLA-----QNRRLYEVDFIDCLTQSRDPNILIRVTWIDSEIV     | 4241 |
| APHANOMYCESa    | -P-P-----AA-----PKHSVLSVPDIAKALIHVIAAPNVILGRMIFHNSNA      | 3773 |
| APHANOMYCESb    | -VPS-----DV-----PKHGLSPLDIAKALIDIMDANVILGRMIFHNSNA        | 3693 |
| PYTHIUM         | -IANAQASTASS-----TTSGAMSSLAQAQDLALASAPDILIRTFQGMIBWL      | 4049 |
| PLASMOPARA      | -AASGTED--GA-----DEIAAALSSLEAQAQLLAINAPDILIRTFQGMIBWL     | 4008 |
| BREMIA          | -AASFGDIDERD-----NEVTTLSLGAQAQLLAINAPDILIRTFQGMIBWL       | 3990 |
| AEDDES          | -QVSDP-----LL-----ESGNLTVEQVQGLKTNVSGAVLITVAGMFBWF        | 3998 |
| MIDGE           | -IGDENMFRSQI-----GERKLSVEDVQGLHEMADKAILIEMVILMIDPFI       | 4023 |
| BOMBUS          | -LIKRTKAK-----LNGFLTPEBETELLDQADNDNLILIRTVWIKRML          | 3846 |
| ANT             | -ELKQARSQPCIT-----GNDHITPAQVVDCLDQAKDLITLGRMIAWQSL        | 3927 |
| WHIPWORM        | I-NETRRNAPRGY-----SSRSLSVDDVNSLHLELVPLVLRVTHHEBFI         | 3981 |
| TRICHINELLA     | L-SEEDQSAPRGY-----PLQALTVEQVQGLHEMADSVLIRTVIFHEAHI        | 3993 |
| BEEBLE          | -GNSDFNVRAARL-----AGNGLSEEDIAICLDHMDNYLILGRMIFHMAHV       | 3814 |
| BARNACLE        | -GRRGHEPRAEL-----ADAGLTAEQVVDCLLELDNDRYVLCLAYSMAAHV       | 3859 |
| THRIP           | -GDASRNIRAKL-----GYNDLTPROQVECLDLDADPNVILKTVGGVEBWL       | 3908 |
| FLEA            | -GVEQHNIIRRI-----KMKDLTAKBOVDCLDLDADRSLILGCTVHGWDBWM      | 3916 |
| WHITEFLY        | -GTNESLRFKFR-----IDQELNANOVDLILLDQAKDKHILIRTVAGHEBWA      | 4001 |
| TICK            | -GVESRMRRRFA-----RGDKLSPRDVVDCLLEQADDPAILGLTWTGEBWL       | 3935 |
| TERMITE         | -SVRSQ-----M-----PSYQLLPEEVDVSLDQADNYLILKTVQGMIBWM        | 3993 |
| DAPHNIA         | -GNRSMILTSET-----IKRKVEPHSSRRASMPQVTECLTQSDPAQLSRMIVGEBFI | 3692 |
| OSTREOCOCCUS    | -GSN-----AEP-----TSCKATVEBIVRCLDLDADPNILIRAVGHEBWL        | 3936 |
| STREPTOR        | -EPKQ-SLRM-----ANSVLSVDDVLDLEHEDPNILIRTVIFHSEIV           | 3633 |
| KLEBSORIDIUM    | -DPRVNIARAKV-----DKKICATVQVVECLDLDADPNVILGRMIFHNSNA       | 4320 |
| CLUBMOSS        | -DPVKNTRRRI-----DRKICASVEEVDCLDQADPNILIRLAVHNSHM          | 3914 |
| MOSS            | -DPSRNIRARV-----AGNVCSVQEVDCLDQADPNILIRLAVHNSHM           | 4098 |
| LIVERWORT       | -GSPDRNMRART-----MGNICQSIREVVDCLDQADPNILIRLAVHNSHM        | 4152 |
| LIGNANO         | -DRRRISVGGGD-----AAERLVPMQAEALLVDMADPALLARTVGGWQDL        | 4430 |
| COPEPOD         | -GERLSTSGKRR-----DALCDDTGLSPSDVDLILHOSDKNLLGRMIVGDBFA     | 3881 |
| GLOBOSUM        | -GDPVINIRAKA-----GNICQTPKEVVECLDLDADPNVILGRMIFHNSHM       | 3891 |
| PALUSTRIS       | -GEGKTRRSQV-----GRKCSVKEVVECLDQADPNILIRAVHNSHM            | 3957 |
| NEOCALLIMASTIX  | -GDPKYNIRAOPEY-----NEISDEGSNVLSPIQVVDCLDLDADPNILIRAVHNSHM | 4071 |
| GLOMUS          | -GDPNINIRARA-----RQKCFVKEVVECLDLDADPNVILGRMIVGDBFA        | 4073 |
| LOBOSPOR        | -GDSLHNVRARH-----GRVCASVQATECLDLDADPNILIRAVHNSHM          | 4053 |
| SYNCEPHALASTRUM | -GDEKHNVRARI-----GPVCSDTROVVDCLDLDADPNILIRAVHNSHM         | 4040 |
| FUNCTIVORUM     | -GSKHNIIRAKV-----GKCSVKEVVDCLDQADPNILIRAVHNSHM            | 4004 |
| HALBUM          | -GDPKHNIRAKA-----CQICSTAKEVVDCLDQADPNILIRAVHNSHM          | 4160 |
| DPURPUREUM      | -GDPKYNIRSKV-----NKICCSVKEVVDCLDQADPNILIRAVHNSHM          | 4168 |
| PVIOLACEUM      | -GDIKYNIRAKV-----NKVCSVKEVVDCLDQADPNILIRAVHNSHM           | 4161 |
| AMPHIPOD        | -SQD--EGRALM-----AKEGLSVPOVVDCLLELDADPNILIRTVIFHSEIV      | 4091 |
| SHRIMP          | -GDRGESVRAV-----GERGLSTHQVVDLILLEQADPNILIRSVIHWDBEL       | 4065 |
| MUDCRAB         | -GQNCESARANM-----DRTGLTIHQVVDLILLEQADPNILIRTVIFHSEIV      | 4057 |
| TARDIGRADE      | -GD-ADGVRAXH-----GDRHLEVEATECLDQSDENILIRLFSHNSHM          | 4115 |
| HYDRA           | -GSSQHNIRKLLDR-----TNNPEKFLTVEEVDCLDQADPNILIRAVHNSHM      | 3970 |
| SALPINGOCEA     | -GDAQSNIRATM-----PEHGLSVEDVVRCLDQADDPVILIRTVAGHEBWL       | 4189 |
| SPIDER          | -GDASHNIRAQL-----KKSGLSVEEKIESLDQADDPVILIRTVIFHNSHM       | 4088 |
| LIMULUS         | -GDEKHNIRAKL-----ADKDLTVEVDVVDCLDQADPNILIRAVHNSHM         | 4148 |
| SCORPION        | -GDRK-SLRNL-----PKNGLSVQVVDCLDQADPNILIRTVIFHSEIV          | 4131 |
| ROTIFFER        | -GNKLLSRNGLLERSKILAENGKYLITVEVVDCLDQADPNILIRTVIFHSEIV     | 4070 |
| CIONA           | -ID--TKNIRFLM-----PKSGLSVSEVVDCLDLDADPNVILGRMIFHNSNA      | 4144 |
| OCTOPUS         | -IT--EGNVRYTL-----POKHLTVEQVITNLDLADPNILIRTVIFHNSHM       | 4025 |
| CAPITELLA       | -GDKQADIRARL-----PADGLSSEEVANALDLDADPNILIRTVAGHEBWL       | 4106 |
| LIMPET          | -GDAKDNVRAATL-----PSTGLTVEQVVALDQADPNILIRTVAGHEBWL        | 4082 |
| SCALLOP         | -GE-RDDTRAQL-----PQDSLSEEDVVALDQADPNILIRTVAGHEBWL         | 4172 |
| LINGULA         | -IQGQDNTRTKF-----AEVDLTPEQVVALDQADPNILIRTVAGHEBWL         | 4114 |
| OYSTER          | -GDKRENVRAQL-----PASGLTVEQVVALDQADPNILIRTVAGHEBWL         | 4115 |
| SNAIL           | -GQVQDNIRARL-----KEKGLTVEQVVALDQADPNILIRTVAGHEBWL         | 4122 |
| SPONGE          | -GDSSTNLRARV-----GKRCDSVEDVVDCLDLDADPNVILGRMIFHNSHM       | 4157 |
| PRIAPULA        | -GDPKSNLARAQL-----PPEGLTVEQVQGLHEMADPESSLIRTVIFHNSHM      | 4163 |
| DANTO           | -GEEQHNIRAKL-----ADKDLTVEVDVVDCLDQADPNILIRAVHNSHM         | 4119 |
| ESHARK          | -GDEKHNIRARV-----PEDGLSEETVVKCLDQADPNILIRTVAGHEBWL        | 4141 |
| BHARK           | -GDKHNVRARE-----SEEGLSVEEVDCLDQADPNILIRAVHNSHM            | 4134 |
| XENOPUS         | -GDKKHNRRTNE-----PPDGLTEFTVQGLDQADPNILIRTVIFHNSHM         | 4146 |
| STERLET         | -GEEKHNVRARE-----APQGLSVETVVECLDQADPNILIRTVIFHNSHM        | 4150 |
| GAR             | -GEGQVNVRAQV-----AAEGLAVEIVVECLDQADPNILIRTVIFHNSHM        | 4147 |
| HUMAN           | -GSKDHNIRAQV-----PESGLSEETVVKCLDQADPNILIRTVIFHNSHM        | 4128 |
| PLATYPUS        | -GSKDHNVRARQ-----PEEGLSEEQVQGLDQADPNILIRTVIFHNSHM         | 4135 |
| TASDEVIL        | -GNRDHNIRAQV-----PDDGLSEETVVKCLDQADPNVILGRMIFHNSNA        | 4140 |
| COELACANTH      | -GDPDHNVRARE-----VKEDLPVETVVALDQADPNILIRTVAGHEBWL         | 4147 |
| CAECILIAN       | -GDKTHNVRARE-----PKDGLTEETVVKCLDQADPNILIRTVAGHEBWL        | 4143 |
| CANARY          | -GNSNHDIRAKE-----PEDGLSEETVVKCLDQADPNILIRTVAGHEBWL        | 4136 |
| OSTRICH         | -GNAAHNTRAKE-----PEDGLSEETVVKCLDQADPNILIRTVAGHEBWL        | 4106 |
| GECKO           | -GSKHNIIRAKE-----AEDGLSEETVVKCLDQADPNILIRTVAGHEBWL        | 4146 |
| TURTLE          | -GSDHNIIRAKE-----PEDGLSEETVVKCLDQADPNILIRTVAGHEBWL        | 4144 |
| ALLIGATOR       | -GTRDQNIIRAKE-----PEDGLTEETVVKCLDQADPNILIRTVAGHEBWL       | 4104 |
| APLYSIA         | -GKD--SVRAGL-----PAHGLSVEQVVALDQADPNILIRTVAGHEBWL         | 4187 |
| TRICHOPLAX      | -GDKQYNERARM-----PADNLSVEDVVTCLDQADPNILIRTVIFHNSHM        | 4127 |
| SOFTCORAL       | -GDKQHNRARH-----YVNTVENVVALDQADPNILIRTVIFHNSHM            | 4142 |
| STONYCORAL      | -GDRNANVRARE-----PESGLSVESVVSCLDQADANILIRTVIFHNSHM        | 4170 |
| SEA_ANEMONE     | -GDRRHNVRAQK-----EENELTSEAVDCLDQADPNVILGRMIFHNSNA         | 4111 |
| SEACUKE         | -GDHRVNIARAQV-----AREPSGLSVEDVVALDQADPNILIRTVIFHNSHM      | 4141 |
| LANCELET        | -GDDGKDVRAQK-----PAEGLSVEDVVALDQADPNILIRTVIFHNSHM         | 4205 |
| STARFISH        | -GDRSQNIRASS-----PKSGLSVETVVECLDQADPNILIRTVAGHEBWL        | 4203 |
| SEA_URCHIN      | -GNTESKRAQS-----KSKGLSVEDVVALDQADPNILIRTVIFHNSHM          | 4178 |

:: : \*
