# Supplementary material for: Uncovering DNA-PKcs ancient phylogeny, unique sequence motifs and insights for human disease
Source: PubMed Central journal article supplement — Prog Biophys Mol Biol. Author manuscript; Available in PMC 2022 Aug 1. (PMC8021618; doi:10.1016/j.pbiomolbio.2020.09.010), 2020-10-06
Supplement: NIHMS1638735-supplement-8.pdf [file NIHMS1638735-supplement-8.pdf]

**Supplementary Figure 7:** COBALT sequence alignment of DNA-PKcs from selected metazoan plus choanoflagellates, platyhelminths, paramecium, slime mould, amoeba, fungi, green algae, liverwort, moss and oomycetes. (All phyla, expanded list). See Supplementary Table 1 for additional information on sequences. The human sequence is highlight in yellow. Conserved amino acids are shown in red and blue.

**Panel A: Key to identification of sequences. See Supplementary Table 1 for details.**

Supplementary Figure 7: DNA-PKcs: All phyla - expanded list: COBALT

| Accession         | Description  |                          |
|-------------------|--------------|--------------------------|
| lcl Query_CAPIT   | CAPITELLA    | Annelid worm             |
| lcl Query_LINGU   | LINGULA      | Brachiopod               |
| lcl Query_LIMUL   | LIMULUS2     | Horseshoe crab           |
| lcl Query_SPIDE   | SPIDER       | Spider                   |
| lcl Query_SCORP   | SCORPION     | Scorpion                 |
| lcl Query_TICK    | TICK         | Tick                     |
| lcl Query_MONOS   | MONOSIGA     | Choanoflagellate         |
| lcl Query_ROSET   | ROSETTA      | Choanoflagellate         |
| lcl Query_BELCH   | BELCHER      | Lancelet                 |
| lcl Query_CIONA   | CIONA        | Tunicate                 |
| lcl Query_CAECIL  | CAECIL       | Amphibian                |
| lcl Query_CAPI    | HUMAN        | Human                    |
| lcl Query_MOUSE   | MOUSE        | Mouse                    |
| lcl Query_XENOPUS | XENOPUS      | Frog                     |
| lcl Query_FLATY   | PLATYPUS     | Platypus                 |
| lcl Query_TASDE   | TASDEVIL     | Tasmanian Devil          |
| lcl Query_CANAR   | CANARY       | Canary                   |
| lcl Query_OSTRICH | OSTRICH      | Ostrich                  |
| lcl Query_TURTLE  | TURTLE       | Turtle                   |
| lcl Query_GECKO   | GECKO        | Gecko                    |
| lcl Query_DANIO   | DANIO        | Zebrafish                |
| lcl Query_SNAKE   | SNAKE        | SNAKE                    |
| lcl Query_STERL   | STERLET      | Fish                     |
| lcl Query_MILII   | MILII        | Shark                    |
| lcl Query_BAMBO   | BAMBOO       | Shark                    |
| lcl Query_ALLIG   | ALLIGATOR    | Alligator                |
| lcl Query_GAR     | GAR          | Fish                     |
| lcl Query_TETRA   | TETRAHYMENA  | Tetrahymena              |
| lcl Query_PARAM   | PARAMECIUM   | Paramecium               |
| lcl Query_SLEMN   | SLEMNIAE     | Ciliate                  |
| lcl Query_STENT   | STENTOR      | Stentor                  |
| lcl Query_NEMAT   | NEMATOSTELLA | Sea Anemone              |
| lcl Query_PISTI   | PISTILLATA   | Coral                    |
| lcl Query_CORAL   | SOFTCORAL    | Coral                    |
| lcl Query_HYDRA   | HYDRA        | Fresh water polyp        |
| lcl Query_LATIM   | LATIMERIA    | Coelacanth               |
| lcl Query_SHRIM   | SHRIMP       | Shrimp                   |
| lcl Query_MCRAB   | MUDCRAB      | Mud crab                 |
| lcl Query_AMPHI   | AMPHIPOD     | Amphipod                 |
| lcl Query_BARNA   | BARNACLE     | Barnacle                 |
| lcl Query_COPEP   | COPEPOD      | Copepod                  |
| lcl Query_DAPHN   | DAPHNIA      | Daphnia                  |
| lcl Query_STARF   | STARFISH     | Starfish                 |
| lcl Query_STRON   | STRONG       | Sea urchin               |
| lcl Query_SEACU   | SEACUKE      | Sea cucumber             |
| lcl Query_FUNGI   | FUNGIVORUM   | Amoeba                   |
| lcl Query_DPURP   | DPURPUREUM   | Amoeba                   |
| lcl Query_HALBU   | HALBUM       | Slime mould              |
| lcl Query_GLOBO   | GLOBOSUM     | Fungi                    |
| lcl Query_PALUS   | PALUSTRIS    | Fungi                    |
| lcl Query_CALIF   | CALIFORN     | Fungi                    |
| lcl Query_GLOMU   | GLOMUS       | Fungi                    |
| lcl Query_LOBOS   | LOBOSPOR     | Fungi                    |
| lcl Query_RACEM   | RACEMOS      | Fungi                    |
| lcl Query_PVIOL   | PVIOLACEUM   | Slime Mould              |
| lcl Query_BOMBU   | BOMBUS       | Bumble Bee               |
| lcl Query_AEDES   | AEDES        | Mosquito                 |
| lcl Query_ANT     | ANT          | Ant                      |
| lcl Query_WHITE   | WHITEFLY     | Fly                      |
| lcl Query_BEETL   | BEETLE       | Beetle                   |
| lcl Query_THRIP   | THRIP        | Insect                   |
| lcl Query_TERMI   | TERMITE      | Termite                  |
| lcl Query_FLEA    | FLEA         | Flea                     |
| lcl Query_MIDGE   | MIDGE        | Insect                   |
| lcl Query_LAODE   | LAODELPHAX   | Planthopper/bug          |
| lcl Query_LOTTI   | LOTTIA       | Limpet                   |
| lcl Query_APLYS   | APLYSIA      | Sea slug                 |
| lcl Query_SCALL   | SCALLOP      | Scallop                  |
| lcl Query_CRASS   | CRASSO2      | Oyster                   |
| lcl Query_OCTOP   | OCTOPUS      | Octopus                  |
| lcl Query_POMAC   | POMACEA      | Snail                    |
| lcl Query_WHIPW   | WHIPWORM     | Worm                     |
| lcl Query_TRICH   | TRICHINELLA  | Parasitic Worm           |
| lcl Query_AASTA   | AASTACI2     | Mold                     |
| lcl Query_AEUTE   | AEUTEICHES   | Mold                     |
| lcl Query_PLASM   | PLASMOPARA   | Plant pathogen           |
| lcl Query_BREMI   | BREMIA       | Mildew                   |
| lcl Query_OLIGA   | OLIGAND      | Oomycete/fungal parasite |
| lcl Query_LIGNO   | LIGNANO      | Flatworm                 |
| lcl Query_CESTO   | CESTODA      | Tapeworm                 |

*Supplementary Figure 7: DNA-PKcs: All phyla - expanded list: COBALT*

|                 |              |             |
|-----------------|--------------|-------------|
| lcl Query_OVI2_ | OVI2         | Liverfluke  |
| lcl Query_PRIAP | PRIAPULA     | Worm        |
| lcl Query_ROTIF | ROTIFER      | Rotifer     |
| lcl Query_SPONG | SPONGE       | Sponge      |
| lcl Query_TARDI | TARDIGRADE   | Tardigrade  |
| lcl Query_TRICH | TRICHOPLAX   | Placazoa    |
| lcl Query_OSTRE | OSTREOCOCCUS | Green algae |
| lcl Query_NITEN | NITENS       | Green algae |
| lcl Query_CLUBM | CLUBMOSS     | Moss        |
| lcl Query_MOSS_ | MOSS         | Moss        |
| lcl Query_LIVER | LIVERWO      | Liverwort   |

**Panel B: Sequence alignment from COBALT**























Supplementary Figure 7: DNA-PKcs: All phyla - expanded list: COBALT

|              |     |                                                                                   |                                                                      |                                                       |                             |      |     |
|--------------|-----|-----------------------------------------------------------------------------------|----------------------------------------------------------------------|-------------------------------------------------------|-----------------------------|------|-----|
| Query_CAPIT  | 677 | NRQLKIET[ 8]DEEF[ 4]AQEEACFMLTFKFAKEVMT                                           | RLRQYKDDLLASCLGFILALPRE--IIALD                                       | VTT-                                                  | 750                         |      |     |
| Query_LINGU  | 683 | SLSRDQDG[ 7]BEKI[ 2]-DRETAFLLFKSKFTKEVLV                                          | RIKQYKDDLLASCLFVILALPPE--LVIAD                                       | LPT-                                                  | 752                         |      |     |
| Query_LIMUL  | 677 | N-TLLRPK[ 7]DDPF[ 2]-ERILSFQLFSKFAKDAVI                                           | SLQQYKDDLLASCLQVLVLPSE--IVLSE                                        | ISH-                                                  | 745                         |      |     |
| Query_SPIDE  | 689 | S-SN---T[ 7]SNDF[ 2]-LVQSYTLFSKFKVEIAV                                            | QHTQFRDDLLASCLQVVLVLPME--IVAKE                                       | IHS-                                                  | 754                         |      |     |
| Query_SCORP  | 684 | K-KL-KTK[ 6]----[ 2]-DCLIAFLFAKFSREVI                                             | YLQQFKDELLASCLVILVLPTE--IVESE                                        | INI-                                                  | 746                         |      |     |
| Query_TICK   | 655 | ----QPS                                                                           | RLQLKDDLLASCLVILVLPTE--LVQEH                                         | ARA-                                                  | 707                         |      |     |
| Query_MONOS  | 625 | ----EHQKL                                                                         | QCKQFKDELLTCLRFVLTCTPT--VVKSR[ 1]--Ev                                | 680                                                   |                             |      |     |
| Query_ROSET  | 600 | ----KTA                                                                           | RSKQYKDELLASCLTFVLSLPL--VVKSR[ 1]--Av                                | 659                                                   |                             |      |     |
| Query_BELCH  | 697 | DTKL----[ 10]EGRD[ 2]SEGOACFTLFRKFKVEVLV                                          | RLKQYKDDLLASCLLVLVLPHQ--IVQSE                                        | IST-                                                  | 766                         |      |     |
| Query_CTONA  | 688 | --DEHEVA                                                                          | RCKQYKDELLTACLIFLLSLPND--VCKDI                                       | LPQ-                                                  | 757                         |      |     |
| Query_CAECIL | 696 | SPKSHKHC                                                                          | PKD--PERFACFALFAKFKGEVSA                                             | KMKQYKDELLASCLIFLLSLPHD--IIMLD                        | IKA-                        | 756  |     |
| Query_HUMAN  | 687 | SPKSLKHS                                                                          | PED--PEKYSFCALFVKFKGEVAV                                             | KMKQYKDELLASCLTFVLSLPHN--I IELD                       | VRA-                        | 747  |     |
| Query_MOUSE  | 686 | SPKSLKHS                                                                          | PED--TEKYSFCALFAKFKGEVSV                                             | KMKQYKDELLASCLTFVLSLPHD--I IELD                       | VRA-                        | 746  |     |
| Query_XENOPU | 708 | TSKIYKKA                                                                          | PED--PERLSCFALFAKFKGEVSS                                             | KIRQYKDELLASCLTFVLSLPHD--IIMMD                        | IKA-                        | 768  |     |
| Query_PLATY  | 689 | SPKSLKHS                                                                          | PED--PEKYSFCALFAKFKGEVAV                                             | KMKQYKDELLASCLTFVLSLPHD--IIMLD                        | IKA-                        | 749  |     |
| Query_TASDE  | 692 | SPKSHKKS                                                                          | PED--PEKYSFCALFAKFKGEVSI                                             | KMKQYKDELLASCLNFVLSLPHD--I IELD                       | IKA-                        | 752  |     |
| Query_CANAR  | 686 | SPKSLRRC                                                                          | PED--PEKSSCFALFVKFKGEVAA                                             | KMKQYKDELLASCLIFLLSLPHD--IIMLD                        | IKA-                        | 746  |     |
| Query_OSTRIC | 657 | SPKSLRRC                                                                          | PED--PEKSSCFALFLKFKGEVTA                                             | KMKQYKDELLASCLFLLSLPDP--IIMLD                         | IKA-                        | 717  |     |
| Query_TURTLE | 695 | SPKSYQRC                                                                          | PDD--PEKSSCFALFAKFKGEVTA                                             | KMKQYKDELLASCLTFVLSLPHD--IIMLD                        | IKA-                        | 755  |     |
| Query_GECKO  | 695 | APKSKKCC                                                                          | PEN--PEKSSCFALFAKFKGEVTA                                             | KMKQYKDELLASCLIFVLSLPHD--IIMLD                        | IKA-                        | 755  |     |
| Query_DANIO  | 702 | KQCPKQVG                                                                          | GST--MEN--ACFSLAKFKGEVCC-[ 1]RMKQYKDELLAACLMFVLSLPHG--MVALD          | IKA-                                                  | 761                         |      |     |
| Query_SNAKE  | 695 | SPESYTKY                                                                          | PED--PERSSCFALFSKFKGEVTT                                             | KMKQYKDELLASCLTFVLSLPHN--IIMLD                        | IKA-                        | 755  |     |
| Query_STERL  | 697 | SPRSCKTS                                                                          | PED--PKYACFALFAKFKGEVST[ 8]RMKQYKDELLASCLTFVLSLPHD--IVALD            | IKA-                                                  | 765                         |      |     |
| Query_MILII  | 694 | SNTWKQC                                                                           | HTD--PEKACFALFKFKGEVTT                                               | RMKQYKDELLVSNFVLSLPHD--I IELD                         | IKA-                        | 754  |     |
| Query_BAMBO  | 697 | NPKTRKQC                                                                          | PKN--PEKACFALFKFKGEVTA                                               | RMKQYKDELLASCLTFVLSLPHD--I IELD                       | IKT-                        | 757  |     |
| Query_ALLIG  | 655 | SPGTQKY                                                                           | PED--PEKSSCFALFAKFKGEVAA                                             | RMKQYKDELLASCLTFVLSLPHD--IIMLD                        | IKA-                        | 715  |     |
| Query_GAR    | 694 | SPKSPQNP                                                                          | POD--PEKYACFALFAKFKGEVSS-[ 1]RMKQYKDELLASCLTFVLSLPHD--IVALD          | IKA-                                                  | 754                         |      |     |
| Query_TETRA  | 683 | ----KKY[ 1]KKDI[ 1]-----SQIKIPFSELYK[ 1]-LGGYQDELLIDCLKTMLSIPFE--VLLID[ 4]FRKN    |                                                                      |                                                       | 739                         |      |     |
| Query_PARAM  | 640 | --LKYIKET[ 3]NQQP[ 3]RQKQLINLILKLGKLIQ[ 1]-LKSYSQQLIEALNVLITPVE--EIVKDN[ 3]LKSE   |                                                                      |                                                       | 711                         |      |     |
| Query_SLENN  | 671 | SDDISVA                                                                           | ---K[ 1]GEQNTYNNMLTTFKELIG[ 1]-QEEYQDELLTCLDLLHVEVQ--ILYRQ[ 9]----   |                                                       | 736                         |      |     |
| Query_STENT  | 617 | --SDLQS                                                                           | ---T[ 1]G-----NLLKFIK[ 1]-----MQSFQDALLSCLIEVLAAPIC--IVY--[ 6]L-SL   |                                                       | 649                         |      |     |
| Query_NEMAT  | 686 | TAD-----                                                                          | ---[ 7]SDCTNCFILFRKFIKEVLI                                           | KMKQYKDELLSCLSLVLSLPE--IVAVD                          | VAA-                        | 765  |     |
| Query_PISTI  | 696 | KAEKPDLC                                                                          | NENL[ 7]SDCMKCFVLFHKFKVEIVV                                          | RMQYKDDLLFVLSLVLVLE--LVTLD                            | LVS-                        | 764  |     |
| Query_CORAL  | 685 | LKDVSTGC                                                                          | VDM[ 7]SDRCNCFILFKHFAVEVTV                                           | RMKQYKDDLLKSSCLQVLVLPNE--LVICD                        | IDI-                        | 753  |     |
| Query_HYDRA  | 647 | --ANN----                                                                         | ---[ 2]DEKARLFKMLSAFVKEVSA                                           | RVKQFKDELLVSAVMFVLSLPE--VIKES                         | KKF-                        | 701  |     |
| Query_LATIM  | 695 | SSKSKCON                                                                          | SLD--PEKYACFALFAKFKGEVCA                                             | RMKQYKDELLASCLGFVLSLPHD--IVELD                        | VKA-                        | 755  |     |
| Query_SHRIM  | 684 | ----RKQ                                                                           | ---[ 1]PEVETSILHMSYVRELLQ                                            | RCRQYRQDLLASCLTILHLPLC--IVQEI                         | FPQ-                        | 737  |     |
| Query_MCRAB  | 682 | ----KTK                                                                           | ---[ 1]PEVETLHLITSYVKDVLQ                                            | RCRQYRQDLLASCLTILHLPLC--IVQEI                         | FPQ-                        | 737  |     |
| Query_AMPHI  | 701 | ----ROQ                                                                           | ---[ 1]VASRNLGELVVSFASDCCE                                           | TSKQFSDHLLASCLFVLSLPHD--LARIQ                         | LPQ-                        | 754  |     |
| Query_BARNA  | 669 | -----QEN                                                                          | -SDS 7]-----LWAAHVSETAP                                              | RCSQYRDELQEAQVSMVLAAPAA--LAAD[ 1]--AA                 | 722                         |      |     |
| Query_COPEP  | 662 | -----                                                                             | -PDT[ 1]-----LPTLILQQLQEHQ[ 1]SLSFQDVELRIAFNVLVNIPLK--FVPG[ 1]--S    |                                                       | 710                         |      |     |
| Query_DAPHN  | 632 | -----                                                                             | -----YQSYMTSLIN                                                      | RLSQLSDVVLVSAVQVLSLPHD--LVISL                         | --SS                        | 672  |     |
| Query_STARF  | 690 | KP-----S[ 11]DINF[ 9]SDRNICFTLFAKFKSKEVLV                                         | RLKQYKDDLLASCLLVLVLPHE--IVQAE                                        | VAH-                                                  | 766                         |      |     |
| Query_STRON  | 688 | NPWVFTFR[ 10]DDDS[ 14]SDKQACFILFSKFKSKEVLI                                        | RLKQYKDDLLASCLFVLSLPHQ--VVNQ                                         | VHD-                                                  | 773                         |      |     |
| Query_SEACU  | 689 | GK-----A[ 11]DPH-[ 6]GDRQACFTLFAKFAKEVTV                                          | RLTQYKDDLLASCLFVILALPPE--IVQAE                                       | VNN-                                                  | 761                         |      |     |
| Query_FUNGI  | 697 | -----[ 6]-----[ 5]GKIRMCSVLFPSRYIKEVIG                                            | RIDQFKDELLSCLQVLSLPHQ--VV--P                                         | ISQ-                                                  | 755                         |      |     |
| Query_DURP   | 760 | ELENDLM[ 6]-----[ 9]DK--KNCFILFKKYIKEVSN                                          | FISHYKDELLSCLVLSLPHD--LI--S                                          | IPL-                                                  | 827                         |      |     |
| Query_HALBU  | 768 | SLDANG--[ 7]DSGR[ 9]NK--RNCFILFAKFKVEVAA                                          | ASTQYKDELLASCLVLSLPHD--LV--N                                         | IPV-                                                  | 841                         |      |     |
| Query_GLOBO  | 623 | VPTRNE--[ 8]EES[ 1]-VTKAARSLFSKYLDEVLL                                            | KMRQYKDDLLVSNFVLSLPHD--LT--T                                         | IES-                                                  | 688                         |      |     |
| Query_PALUS  | 653 | APDRKEYI[ 8]EQAT[ 1]-EQRTYILFNYIREVLV                                             | RLQYKDDLLASCLRVVLPVSE--LI--S                                         | VQD-                                                  | 720                         |      |     |
| Query_CALIF  | 727 | KKEYIGES[ 8]NEPY[ 1]GKQRTYILYTKYINEIIS                                            | RMQYKDDLLVSNFVLSLPHD--LI--S                                          | LND-                                                  | 795                         |      |     |
| Query_GLOMU  | 707 | NVDNENIM[ 8]STAA[ 1]PTQRASYFLFKFDFEVA                                             | RLPQYKDDLLASCLRVVLPVSE--LI--N                                        | IQN-                                                  | 775                         |      |     |
| Query_LOBOS  | 692 | SL-MERIK[ 8]HRAA[ 1]-----LFKKYIYEVLA                                              | RLEQYKDDLLASCLHVLVLPHE--LI--E                                        | PSN-                                                  | 751                         |      |     |
| Query_RACEM  | 664 | KLYHEQ--[ 7]EPTS[ 1]PDLYVTYLSFRDFLSSTRY                                           | RLQYKDELLAACLVLSLPHD--FF--D                                          | IQQ-                                                  | 729                         |      |     |
| Query_PVIOL  | 735 | DLDENNN-[ 5]-----[ 9]NK--KNCFILFKFKVEVAV                                          | NVSHFKDELLSCLVLSLPHD--LI--N                                          | VSQ-                                                  | 802                         |      |     |
| Query_BOMBU  | 637 | ----LSSD                                                                          | -EIE[ 4]-E-----MLNKYIMNVLN                                           | LIPTFSNELLTFCVHLVLDVPM--YVENI                         | LNS-                        | 690  |     |
| Query_ABDES  | 666 | ----LQRQ                                                                          | -QNF                                                                 | -STMSTNLLVYYLE--LQI[ 1]KSRNSTGELVLTCLRFVLPVAVT--LSDSF | LDD-                        | 721  |     |
| Query_ANT    | 650 | ----KQEE                                                                          | -EEE[ 4]-ESQQMEELLSNVLWHSLD                                          | LIPGFSNELLTACLIVLIDAPV--HVKNL                         | LPR-                        | 709  |     |
| Query_WHITE  | 654 | ----TET                                                                           | -TST[ 2]-EAEFRLLVQSYLLEVLN                                           | RALQFTDELQIACLIVHMAAPT--FIDPI                         | LPL-                        | 710  |     |
| Query_BEETL  | 649 | ----SSC                                                                           | -EDA                                                                 | -TMCYTLRKFVLSLNLN                                     | KTQFTGDLTACLIVLQYIV--IKDM   | LST- | 701 |
| Query_THRIP  | 630 | ----QEK                                                                           | -DEM[ 3]-EWRSTVNLVSAFLYDVIS                                          | RQAQYRSDLQVSAFLVLPVSE--IALPL                          | LRV-                        | 687  |     |
| Query_TERMI  | 661 | ----DYG                                                                           | -DML[ 4]-EQKASYSLRCRFLQELLI                                          | RLQYKNDLQVACLIVLAPV--LVVPL                            | LPH-                        | 719  |     |
| Query_FLEA   | 618 | ----HYE                                                                           | -ESE                                                                 | -EKSSCYVLSLNFVLPVSE                                   | NVRMFGDQLVSAFLVLPVSE--FIPEL | LVE- | 672 |
| Query_MIDGE  | 665 | ----VTNA                                                                          | -TDF                                                                 | -DMTKIEESLSPYIKSMII[ 1]RCQLLSSELQIATLRFVLPVSE--LIEF   | ADE-                        | 721  |     |
| Query_LAODE  | 662 | ----EDS                                                                           | [ 2]-----CQKEINYYIGDILLV[ 1]-LHHYKRDVQEAFLVITSSV--LIAH               | LQQ-                                                  | 711                         |      |     |
| Query_LOTTI  | 678 | ESNEQE--                                                                          | -----KQKAVCYLLIKKFSKEVLV                                             | RMKQYQDLLAACLVLSLPHD--IITEQ                           | MID-                        | 733  |     |
| Query_APLYS  | 677 | DSQSQK--[ 10]GEGG[ 6]QEVVTFHLIKKFSKEVLV                                           | RMKQYRNELLAACLTLVLSLPHD--IIVDQ                                       | MSS-                                                  | 752                         |      |     |
| Query_SCALL  | 687 | LYLDVMGT[ 12]DQV[ 4]QORDSSYLLMKKFSKEVLV                                           | RMKQYKDDLLASCLTFVLSLPHD--IVAQ                                        | MVE-                                                  | 764                         |      |     |
| Query_CRASS  | 678 | VSL-----[ 11]SDQ[ 4]HQRTCFILQKFKTEVLV                                             | RMKQYKDDLLASCLTFVLSLPHD--IVSEQ                                       | MSS-                                                  | 749                         |      |     |
| Query_OCTOP  | 674 | SIDNLKIT[ 6]-----[ 2]-EKIACCILIKKFSKEVLI                                          | QLKQYKEELLAACLIVLSLPHD--LIVDQ                                        | IDD-                                                  | 738                         |      |     |
| Query_POMAC  | 674 | AVENSF--[ 8]DETG[ 4]TEKHLTYILIKKFSKEVLV                                           | RMKQYKDDLLASCLTLVLSLPHD--LIAQ                                        | MSK-                                                  | 745                         |      |     |
| Query_WHIPW  | 671 | SISENQVG                                                                          | ---[ 8]DETG[ 4]TEKHLTYILIKKFSKEVLI                                   | RSHSFGDQLVSAFLVLPVSE--TALEK                           | RDL-                        | 727  |     |
| Query_TRICH  | 669 | QAQKDTEN                                                                          | ---[ 8]DETG[ 4]TEKHLTYILIKKFSKEVLI                                   | ESCRFQDQLVSAFLVLPVSE--IIVVEK                          | LES-                        | 725  |     |
| Query_AASTA  | 652 | SASRSPL[ 1]SDAL[ 3]-----YAAFVQVSK                                                 | AMPQYHDELLATSVFVLPVSE--MV--D                                         | LAI-                                                  | 706                         |      |     |
| Query_AEUTE  | 644 | VS-----[ 1]PPAV[ 3]-----YIDFVLGVVN                                                | AMKAYSNELLVSTSVFVLPVSE--MV--D                                        | VKM-                                                  | 692                         |      |     |
| Query_PLASM  | 681 | SASSVDTT[ 1]QTRF[ 3]-----FTSCVQVSS                                                | QARFYQDELRLTSSEFVLPVSE--LV--A                                        | IHA-                                                  | 735                         |      |     |
| Query_BREMI  | 680 | SPATLTMT[ 1]Q--F[ 3]-----FTSFLQVTA                                                | QAQFYQDELRLTSSEFVLPVSE--LV--T                                        | IRS-                                                  | 732                         |      |     |
| Query_OLIGA  | 680 | MRDITDGG[ 1]DVRV[ 3]-----YFIPAKRVIQ                                               | GIRFYQDELLVASSGVLPVSE--LV--P                                         | LVD-                                                  | 734                         |      |     |
| Query_LIGNO  | 694 | VPVMEIA[ 12]QTDN[ 10]ENRIQCAMLGSPAAASLSA                                          | RCGRLRGDLLASCLVLSLPHD--LAVD                                          | RPDD                                                  | 778                         |      |     |
| Query_CESTO  | 584 | ----SNELA[ 1]ETQL[ 3]-----AHFLINSFPPTGAL[ 1]----ADDLSIARSSCLVLSLPHD--VLFHS[ 4]IGH |                                                                      |                                                       | 641                         |      |     |
| Query_OVI2   | 635 | ----RTG                                                                           | DEGS[ 7]EARFETQRLAEFSSDLV[ 7]-DRTEADQRIASRLCLVLPVSE--LIAPIG[ 16]FASH |                                                       | 723                         |      |     |
| Query_PRIAP  | 694 | RKVN----[ 11]DSPD[ 4]AELLNCFTLFKKFSKEVLV                                          | KLKMFQDGLVACLQVLMVLPVSE--IIVVDI                                      | VPE-                                                  | 766                         |      |     |
| Query_ROTIF  | 680 | KIDSIQTN[ 11]IEDC[ 14]YERVNCVFLFKKYLLEVSI                                         | RMKQYKDELLVSNFVLSLPHD--FVVIS                                         | MDH-                                                  | 766                         |      |     |
| Query_SPONG  | 689 | HDLSGQGT[ 1]DDDV[ 7]TRQSCYFLPSSFKVEVTV                                            | QMQQYKDDLLASCLHVLVLPVSE--MVSVD                                       | FKE-                                                  | 758                         |      |     |
| Query_TARDI  | 685 | KDRQDLSL[ 12]DEAE[ 14]EPSSANHVTSFPMRNLLG                                          | RLQHFSDVLIISALQLLNFPIY--AVIDN                                        | LSA-                                                  | 772                         |      |     |
| Query_TRICH  | 669 | NIETVTKC                                                                          | TINA[ 6]IDKYLCLYLLYKFKVEVLV                                          | RLKQYKDDLVSNFVLSLPHD--LIQDD                           | MAL-                        | 736  |     |
| Query_OSTRE  | 692 | ----KSA                                                                           | ----ESERVLVLSQSFVLPVSE[ 1]-TRRFSGELLAVALVLSLPHD--ILPMA               | ---                                                   | 741                         |      |     |
| Query_NITEN  | 708 | DVPMSSEAS[ 12]CTEL[ 31]GDREQCTELFRKFLREVLV                                        | ASRRYKLEHLAACLMVLPVSE--LL--E                                         | IRQ-                                                  | 810                         |      |     |
| Query_CLUBM  | 671 | -----[ 6]V--                                                                      | -----MIQEFVLEVLI                                                     | TSRRYKLELLSCLHVLVLPVSE--LL--D                         | LAS-                        | 717  |     |
| Query_MOSS   | 685 | --LDADGGY[ 12]AGTT[ 4]EDRRLCKELFRKYLQEVLV                                         | ASRRYKLELLAACLVLSLPHD--LV--G                                         | IAS-                                                  | 759                         |      |     |
| Query_LIVER  | 701 | MVTEEEWK[ 12]QRGL[ 4]EHQRICKQQLFRHYLQEVLV                                         | ASRRYKLELLAACLVLSLPHD--LI--D                                         | IGS-                                                  | 776                         |      |     |















Supplementary Figure 7: DNA-PKcs: All phyla - expanded list: COBALT

Table with columns for Query name, ID, Accession/Label, and Sequence. The table lists various DNA-PKcs sequences from different phyla, including entries like Query\_CAPIT, Query\_LINGU, Query\_LIMUL, etc., up to Query\_LIVER.





Supplementary Figure 7: DNA-PKcs: All phyla - expanded list: COBALT

Query\_CAPIT 1368 W---DTLLAVLQPT-QLGFNMGQ-VEVMN HLPEQT LGTLQILM--RSLPRNLQAE LIESVSRHLMNS-sc 1430

Query\_LINGU 1376 W---ILICDCLVNFPS-ALGFNMGD-VEVMN KLPQEQ EQVLRFIS--RYLPKALDM FRRTLKSKLDSG-sy 1438

Query\_LIMUL 1356 W---KCSLCLVDPT-SIGFNMTD-LEIMT QLPHEF THLLKAFY--K-LPSPVLED FAHSLEHRITSE-es 1417

Query\_SPIDE 1365 W---ELILLLVVNP-T-SLGFEMTD-PEIAT KLPMEV SIVVSKLS-K-----KSE FHAFCELYLKS-k 1421

Query\_SCOREP 1361 W---NCLYSSVLPK-FLGFDMDT-TYIFN QFPKET RTLLKVYF--EYMPKPLYYN FNEHLYEYLL--E-sk 1421

Query\_TICK 1313 W---RCYVTVCLSPS-DAGFDLTD-LEVAN QLPNEM LRFELNCS--RTFFPKLLADD FVGAHADLVDRH-pe 1375

Query\_MONOS 1290 M---KMISFLFLNFA-HLGFNAAS-QSIMA QLQVVL[1]-QZLDAVA-----HAST -DSAIQOELEQDLA-t 1346

Query\_ROSET 1258 L---DFICKAVLMP-I-MLDFDPSD-PEIEE KLPKKT[2]---VLASL-LSGEPRTN LVAAMRRTLADSD-ee 1317

Query\_BELCH 1397 Y---DMVVTAALPE-ALGFNMGD-VEIME KLPQET KQLLLLMC--RSLPSQQGAL LKSQVAALKSRR-sS 1459

Query\_CTONA 1356 I---GLLTYAVVSPY-VLGFSTK-ETDLE NLQ---[3]TSALQAL--THLPQNKNNL LVASIAERLAGI--- 1416

Query\_CAECL 1382 V---ELTVLTCVDP-SIGFNVAD-VQVMK NLPDVC IKLLKGLM-K---SPFKND LEFSIKKRITSE--- 1439

Query\_HUMAN 1369 M---RVLVQVTCPEA-SIGFNIGD-VQVMA HLPDVC VNLKALK--M---SPYKDI LETHLREKITAQ--- 1426

Query\_MOUSE 1367 M---QVLVKMICEPM-SLGFNIGD-VQVMN HLPSTC VNLLKALR--K---SPYRDM LETHLKEKVTVQ--- 1424

Query\_XENOP 1393 W---ELIAITVCVDP-SIGFNAD-VEVIN NLPNIC IKMLKALG--N---TSYRSS LEVSLKRRVTLQ--- 1450

Query\_PLATY 1373 M---ELVVEIVCDEP-SIGFNVAD-VQVMS NLPDVC VSMKALK--K---SPYKDA LEGNIKRRVTAQ--- 1430

Query\_TASDE 1376 M---ELLVKTCVDP-SIGFNAD-VQVMS NLPNVC VNLLKALK--K---SPYKES LEINIKKRITPQ--- 1433

Query\_CANAR 1371 I---ELVVMTVCVDP-HVGFNTAD-VQVMK KLPDIS VRLMKALM--K---SPYQES LKLCLEKERITPQ--- 1428

Query\_OSTRIC 1341 I---ELLVMTVCVDP-SIGFNAD-VQVMK NLPDIS VRLMKALM--K---SPYKES LKLSLEKERITPQ--- 1398

Query\_TURTLE 1380 I---ELLVMTVCVDP-SIGFNAD-VQVMK NLPDIS VRLMKALM--K---SPYKES LKLSLEKERITPQ--- 1437

Query\_GECKO 1380 I---ELVTVRTVCDEP-SIGFNAD-VQVME KLPDIC VRLIKALM--R---SPYKES LVTSMKKVITPE--- 1437

Query\_DANIO 1379 F---TLVVLAVCPD-SIGFNAD-LEVMT HLPPEC FPLLKALA--S---APYRTO LESDIRMRITKQ--- 1436

Query\_SNAKE 1380 I---KLVVTCVDP-SIGFNAD-VQVME NLPSIC VRLVKALM--K---TPYNES LENSIKEIITMK--- 1437

Query\_STERL 1392 F---ELITTTVCVDP-SIGFNAD-VEVMK NLPDIC VRLKALA--K---SPYKGG LEISMKRRIISYK--- 1449

Query\_MILII 1376 F---ELIAMVVIDP-SIGFNAD-VQVMK NLPNVC VRLNAVM--K---SPFKET LVDSVRRKRITAQ--- 1433

Query\_BAMBO 1378 F---ELVAVVIDPP-SIGFNAD-VQVMK GLPDIC VRLMKAL--R---SPYQES LECSMCKRLKQS--- 1435

Query\_ALLIG 1338 I---ELLVVTVCDP-SIGFNAD-VQVMK NLPDNT VRLMKALA--K---TPYKSS LELSIKKRITSH--- 1395

Query\_GAR 1379 F---ELIAITVCVDP-SIGFNAD-VEVMT NLPEVC VHLIKAL--K---SPYKQ LEQSIIRRVSQ--- 1436

Query\_TETRA 1359 Y---SFLQMLLKNHLRGMNID-IFLTK --SELY[4]TPVVKALQeITQEGVDFPD[1] VLKALEDIIPKGNkpq 1428

Query\_PARAM 1313 Y---NLSIGIIRRS----YFLKG-IQLDL[3] QVDSVV[3] QRLLQGTIK---FTEFRQV ----LNIEIPDNQevs 1373

Query\_SLENN 1340 ----LAHADLFOKNCFNFIHFC-VQIM ----VI -PLIHQL-----VLVE- DOEFLERQRLNQSSELL 1390

Query\_STENT 1166 ----LKF---LLTNP-----KIG- ----FP -PGAESQE-----FIVL- YDKLSAKVIN---fL 1201

Query\_NEMAT 1373 F---TVVFSALPEA-LIGFVNGD-VEVIE KLPQOV SMT----- KLMNMTFA--- 1420

Query\_PISTI 1393 F---EVLVSLVLEPG-VVGFHMGD-VEVIE KLPQET GVLCCKLV--QRLSGECLER LKGTLEKILALG-sh 1455

Query\_CORAL 1370 F---EALCTSVDLDP-SLGFNVAD-LEVLE KLPQET FELCKSLA--SKLPKQLIHF LTTTLMKISLIG-gr 1432

Query\_HYDRA 1315 L---KVIIVCMVYP-Q-CLGQVSD-LEVLE KLPPEM[4] EKMRKFAP--DHFLNFSYVNV LSSVLEKQY--- 1377

Query\_LATIH 1380 L---ELTVTVTCEPA-SIGFNAD-VQVMK NLPEIC VRLKALM--K---SPYKDT LEASIRKRITAR--- 1437

Query\_SHRIM 1351 F---SLITCCCLDPA-SVGFIDK-TEVSK HLPSSL EELGILA--RRGPESEVIE YSDYLEKQLQKP--E 1412

Query\_MCRAB 1350 Y---GLLQCVLNP-SVGFIDK-TEVTK HLPSPM EELVKVMQ--KPVNVVSSAA FIQLEKYLKSGP--Q 1411

Query\_AMPHI 1374 R---KIFPTAVLEPA-SVGFIDLR-TEVNE KLPRLP VDTLQTPQ--RVLSQEQLV LRKSIDLSMSGD--N 1435

Query\_BARNA 1273 ----cDTVAAYALPA-ELGFDVSE-AAVV R ELPAAL[1]-RLRSVA--RYADAETRL LDTSLARRAAGR--- 1333

Query\_COPEP 1309 V---LLTQTIMEPE-KLGNLKS----N[2]---EDQF[4] IELLRAVR--SSWPYEFSK LENPFTVQVED-eL 1369

Query\_DAPHN 1229 ----IRTCLLPS-RIGSDAS ----EL[4]REIRIIRNLSRPFKPPLEI -----IESVLNSEE--- 1275

Query\_STARF 1402 F---DLVVVICLQPT-VVGFNAD-VEIMN NLPEKT RKLRLM--THLPANLRNN LSKAVTTSVTKS-sh 1464

Query\_STRON 1395 A---EILGCVLQPA-SLGFNAD-TVIMN ALPQT NRVLDDLY--TKLPTQLK LEIVIKKRITAS-rS 1457

Query\_SEACU 1380 S---MLLCSCLFNP-SVGFNAD-VEVMN NLPKTT SQLLELMA--ANLPPKCEE FKTSAKRRITSN-rN 1442

Query\_FUNGI 1313 L---TLVLTSLFPH-MLG-STIS-DINQI ---DRM[4]VQVVDI--HRCNNSDVLE LKRSLEEVL--SqpK 1374

Query\_DUPUR 1432 I---QLLTSLMDPQ-SIGFTNYI-DEKVL ---EL[4]REIRIIRNLSRPFKPPLEI IDHIFSLFTA-VrpK 1496

Query\_HALBU 1442 L---RVVGVSLTFA-VVGFRTID-NNN-- NASNSG[4] VNEL-----PLNLI VDRVCQLIV-NQgdK 1497

Query\_GLOBO 1263 Y---RMLALTFMFAPE-KLGFVDGL-DA-TK[5] RLVEVT[4] RC-----LEQPF----- KMRLMNTFA--- 1317

Query\_PALUS 1318 F---HIATCVFRPE-ELGFAIES-QE-VK[5] RMESVL[4] TN-----LPMW----- -QKVMVQSLA---- 1372

Query\_CALIF 1385 I---DLINCSSLVNR-LGGDLEE-KD-TQ[5] TLQKLL[4] NNELFIDYkVLISS----- LAQESIYS----- 1446

Query\_GLOMU 1425 Y---LLGNLCLLNP-IGLGDQLP-DNIVK[5] ---QVE[4] LP-----KkLSIN----- VTLQAQDLA----- 1479

Query\_LOBOS 1361 F---AVLAACLFPD-SIGSDQLL-KG--S[5] LRDELK[4] VI-----skLPMIS---- -TRSCGEMLM---- 1416

Query\_RACEM 1335 S---RLLAHIVLPEGLVEVQAE-QGALS[5] --EKVL[4] LFLHAMVVGqPKPF -LRTFAKSVN----- 1396

Query\_PVIOL 1410 I---HLVLVMMDFK-KLGFDTIS-PDNMI[5] KSSDEV[4] KQEISNLGRQFKPPLSEI TARIIKLILENGGAK 1484

Query\_BOMBU 1253 F---ELIACRMLQDQ-VIGFDLKN-LEITE ELFVIM GNLLQSIM--HKNNISLHLL LKCELLIVVEKH--- 1313

Query\_ADEDES 1358 ----DLVYQ[4] VIGFDLKN-LEITE QVPKRV MQLDKIE--GFENLRFKET VYQKLEKLSLSS--- 1414

Query\_ANT 1272 S---ALTKMSIMNR-TVGFDVKN-IQMTD KLPVLI ETLNLSMR--SKYSYALPDT FTKCLVNSVREH--- 1332

Query\_WHITE 1300 W---KLIVLCVLRP-TVARGVC-SETS L KQSEVV AELLRLSD--KYLTKQLQAE LHDFASTEVSVV--- 1360

Query\_BEETL 1274 W---MLLVNFMNRQ-SLGFPCFQ-PQDDD NES--- --VLKGPL--NSLPQSQVLQ VGNVLSKVVTDN--- 1329

Query\_THRIP 1269 W---KLLINCVVNP-NLGFDTIS-KNVEE NLSITV QRFRLSLN--THAPASAVND LKCLIKDYLVSSV--- 1329

Query\_TERMI 1330 W---QLIVACVLRP-SLGFDTLYN-TEVTD GLPKNL IQLLGVLQ--ETLPSQLEE LNSLELKGAVSSM--- 1390

Query\_FILEA 1268 S---NVVNVCLFCPQ-DLHFNVEN-NYIQ NYLIKL NEFTENLR--QYKNDTYHQ IEGSITKLENEC--- 1328

Query\_MIDGE 1317 F---DITKQLIQLPQ-RIGSYKKT-KNSLI KLPERI IKPISSTN--DHAPNEFKES LIEVLRTEVITN--- 1377

Query\_LAODE 1300 W---QLLSRCLSSPA-FIGFTTVSgNLNS -LRSA[1]-QLLPKLQ--KHLGDNILKE[1] FVRPIITKLASSLPD 1364

Query\_LOTTI 1357 W---ELLIKCVVQDQ-SVGFNMGD-VEVMN NLPSEV PTKLMFV----- -I-TN-fs 1400

Query\_APLYS 1388 W---RLLCDCLVLP-SVGFNLAD-TEIML NLPKEM SQVLAHVH--KHLPAQLLKQ PKVTLRRL-ET-ec 1449

Query\_SCALL 1391 W---EMVCMCVPEG-SVGFNLGE-VEVMK NLPREM EQVMMVMS--KKLPTKLFDN MKHQFTKL-SG-rR 1452

Query\_CRASS 1364 W---NLISMVQLPS-AVGFNLAD-VEITK NLPTEM EQLLKVLN--AKLPQVFLAA MCKEFGRLL-QG-dr 1425

Query\_OCTOP 1338 W---RLICECVLQD-YVGFNLTD-LEVNV KLPDEL QNLLNPL--KKLPAEFKQQ MRESIKNQLV--nQ 1398

Query\_POMAC 1371 W---RLCIRCVVQD-SVGFNMGD-IEIIT KLPHEM MQVLKVL--KQLPLPERKE LVKLLEQEL-KG-kG 1432

Query\_WHIPW 1327 W---CTVIRKIFPE-SMGFSDHA-VEVTD LYSAKI -PALFGAL--KA-NHHLCAS ISPIFVDHLKSRhpW 1388

Query\_TRICH 1341 W---NAFLKACDPK-SLGFPLYS-QQFPE CISQDV -RLFLAL--KN-NTFLVQQ VSTSMKELYLQfypW 1402

Query\_AASTA 1265 W---DLVLAADVDPK-----AATL-FELST --PEAV[3]VRMCKASLeHQ-LPFRNV--- -VAKHLESS--- 1317

Query\_AEUTE 1236 L---EFVQARIEPE-----RVGL-KEFSD --TQV-[1]MNLQSQSLrrqNLLFRNV-- ----LLQVLSNS--- 1286

Query\_PLASM 1320 ----rDSVVGKLEVE---LPHRAD-LQLHN ---ASSF[3]EEFCSYVTmhsPQWahQMOK[4] MLIKLHQSLAD--- 1383

Query\_BREMI 1306 ----RAVTERILQA-----LLRSTS-MSLHD -TSLV[3]EDFCSYLTVhSSDWANQFQK[4] ILLNLKQLLAH--- 1369

Query\_OLIGA 1328 LegrDDVIADLILSV-IGLVSIGE-VS-GS --LKL[3]KSCFADVArRSLSATSLRK[4] ITSCLKTIQDD--- 1397

Query\_LIGNO 1429 W---TALARALRQD-LLGFDADQ-PSLMA KLLDCL[4] HAVARNLA--P-VGSSYRSS IVSIAAELELAgqS 1495

Query\_CESTO 1249 W---SFLVLCVLLNP-KAGFDTE--STAG DMLKLF[4] ITFVKGSI-----SKFLES[4]----SDLPDIGSS 1310

Query\_OVI2 1510 WllsRCLVQCVLHSDIRECEVSC-QRYLE[3] SLPPP[4] IRNFEALV-----IGDShAQN LSSYVHQRIQD-- 1579

Query\_PRIAP 1381 W---DVLVSLVLDPT-RVGFNMGD-IEVVE KLPQET ERLILALS--WKLNPAPKKE LHSRVARLSEK-k 1442

Query\_ROTIF 1384 F---GLVINMLNP-SLGFSLKN-LEIFS NLSPKI RQFYKLV--QNLPTDKQNK FRQQCQIILLDS-re 1446

Query\_SPONG 1368 Y---TIVMSDFLYS-LVNTAPDD-PSLTA RISEAA VSECLTAMC--TSLPIDVQKN LIAYIASNINTG-qt 1430

Query\_TARDI 1382 A---DIIVRVLPDP-AVGFDLHE-VD--- RLPRQM SEFLKATT--TKVDALWTM IRQAVTLLLEK--- 1439

Query\_TRICH 1356 F---EMIFCLITLP-QLGFNMGD-IEVLE KLPQQM KDVCLGFL--MKLPKDKREL MIITKLELSSRN-rS 1418

Query\_OSTRE 1324 VnacKVMSAIFFPQ-----NLGNeQEASK ---KSI[4]IQLLKTIS-----VDN[1]--SSKAKRLYED-av 1379

Query\_NITEN 1434 H---RLMCLLLLPK-RLGFVTSQ-LKQ-- --SDRL[4]MNLMLREL---AEASSGFKGG VGIALRSLMEPEGgs 1496

Query\_CLUBM 1285 Q---HLCLLLKPK-SMGFTTPE-SSG-- --AEE[4]SSVLSL---TRISSGFKDG LVQVLEMLN-Tsse 1346

Query\_MOSS 1365 Q---QLLCLVLRP-QLGLVISE-LQR--- --AQDL[4]SKVLRFP--TQLSSNLKSE MVELLRVIEGdAp 1427

Query\_LIVER 1389 F---ELMCLALLRPR-DLGFVATD-SHH-- --AEE[4]LGVILRL---SVVSSDFKEG LTKRLMVLAA--dnk 1449



Supplementary Figure 7: DNA-PKcs: All phyla - expanded list: COBALT

|              |      |                                         |                               |                   |      |
|--------------|------|-----------------------------------------|-------------------------------|-------------------|------|
| Query_CAPIT  | 1489 | GmvtAV-D-GKPTLVNLSPP--VSQSLAEKMLTLAF    | QMGYPEKN-LVELIF-nSNNIHGV      | STS-----VQC       | 1547 |
| Query_LINGU  | 1501 | ---SE-DQFRLLLECSPP--STLELSRKLLLELAC     | SMTDKPAQ-ILGAIL-sK-----       | TKT-----KNQ       | 1549 |
| Query_LIMUL  | 1478 | GcVgNV-DGSTFVA--TLNP--PTVALMEKLLDITF    | LLNTQPDY-LIEKLL-vTDNVLTT      | KRDYTSRL----      | 1538 |
| Query_SPIDE  | 1481 | SsicCV-SINKNIA--LNP--ASLNLAEKILKVAY     | KMDLQVQN-LAKALL-eTTEEHS       | KLVV--TK----      | 1538 |
| Query_SCORP  | 1480 | SciLET-ETGCCIP--TLNP--SVLNFgkMLTVAL     | KLDISSED-LKKLL-dEQQLVVS       | NLKT'KTRR----     | 1540 |
| Query_TICK   | 1438 | GA-----DWTPT--LGKELCLRVLELAA            | ALGAQARD-VLEALL-----          | -----             | 1471 |
| Query_MONOS  | 1413 | -LqtGG-----RLHP--SSKETGLVLELAF [4]      | ----CTDALACLLeETVLLAT [5]     | DAPASATQgIQQ      | 1475 |
| Query_ROSET  | 1377 | SHTsEP-----EP--TNLAmAGLLADLAL           | SLSVPKSQ-LLAMLRddTPTPQAG [4]  | TMLASAKsATQ       | 1437 |
| Query_BELCH  | 1520 | SMvtRK-D-GHPTAASLPP--SFHQLTGGLQLAC      | QLHPQGHd-LLDcVM-nKTPMLTG      | GGK-----KSS       | 1578 |
| Query_CIONA  | 1486 | -VklDD-SEEALETQNEVTP--HNIQLGNKILQLSL    | HMAEAAKkLVNCIF-sNKQVATL       | NFDVESHR----      | 1547 |
| Query_CAECIL | 1503 | GI--AP-GDERKSLPSLDI--SSKRLADGLLQLAF     | DLGGQcDE-LVSLLL--NTVKLSV      | PLSGTSQRnIIS      | 1565 |
| Query_HUMAN  | 1490 | GI--AP-GDERQCLPSLDL--SCKQLASGLLELAF     | AFGGLCER-LVSLLL--NPAVLST      | ASLGSsQGvIh       | 1552 |
| Query_MOUSE  | 1488 | GI--VP-AEERQCLQSLDP--SCKSLANGLLELAF     | GFGGLCDH-LVSLLL--NSAMLST      | QYLGSSQRn-IS      | 1549 |
| Query_XENOPU | 1512 | GI--AP-TNERKSLPSLDI--SSKRLAEGLELAF      | MFGQCCEE-LVSLLL--NTVILSV      | PLPGTSQRnIIN      | 1574 |
| Query_PLATY  | 1494 | GI--AP-GDERQSLPSLEI--SSKQLASGLLELAF     | AFGGLCEE-LVSLLL--NTVVLSV      | PLAGTSQRnLIS      | 1556 |
| Query_TASDE  | 1497 | GI--AP-GDERTALPSLEI--SSKRLASGLLELAF     | AFGGLCEE-LVNLLL--NTVVLSV      | PLSGTCQKnLIN      | 1559 |
| Query_CANAR  | 1492 | GI--AP-GGERMSLPCLDL--SSKRLADSLQLAF      | AIDQCCEE-LVSLLL--NTVVLSV      | PLSEASQnGLMN      | 1554 |
| Query_OSTRIC | 1462 | GI--AP-GAERLCLPSLDI--SSKRLADGLLQLAF     | AIDQCCEE-LVSLLL--NTVVLTV      | PLLGASRKnLVN      | 1524 |
| Query_TURTLE | 1501 | SI--AP-GDERKSLPSLDI--SSKRLADGLLQLAF     | AFGQCCEE-LVSLLL--NTMMLSV      | PLSGTSQRnLIS      | 1563 |
| Query_GECKO  | 1501 | GI--AP-GDERKSLPSLDM--SSKRLAEGLLQLAF     | AFGVOCKE-LVSLLL--NSLMLSV      | PLSGVTSQRnLIS     | 1563 |
| Query_DANTO  | 1500 | SI--AP-GTDRKSLPSMDV--GSRKLRADRLVQLSF    | CLGDOSEQ-TVGLLL--NTITLSV      | PLSGSLNPhPLFS     | 1562 |
| Query_SNAKE  | 1501 | GI--AP-GDEGRSLPSLDI--GSKRLAEGLLHLAF     | AFGVRCTE-LVSLLL--NTLMLFV      | PLSGAAQESLIN      | 1563 |
| Query_STERL  | 1513 | GI--AP-GDERKSLPSMDV--SSKRLADGLLQLAF     | SLGGOCKE-LVDLLL--NSIMLSV      | PLSDTSQKnFIT      | 1575 |
| Query_MILII  | 1497 | GI--AP-GDERKSLPSIDV--SSKQLADGLLQLSF     | SLGGOCCEE-LVSLLL--NTMELSV     | PLSGATQKnFIT      | 1559 |
| Query_BAMBO  | 1496 | GI--AP-GDERKSLPTMDV--SSKMLADGLLQLSF     | SLGGOCCEE-LVSLLL--NTVELSV     | PLSGASQRhFIS      | 1558 |
| Query_ALLIG  | 1459 | GI--AP-GDERKCLPSLDI--SSKRLADGLLQLAF     | AFGQCSEE-LVSLML--NTAMLSV      | PLSEAAPrnLIS      | 1521 |
| Query_GAR    | 1500 | GI--AP-GDEKSLPSMDV--SSRRLADGLLQLAF      | SLGGQSEQ-LVSLLL--NTIMLSV      | PLSGTSDKnFIS      | 1562 |
| Query_TETRA  | 1480 | GvksSE---ENILNKQDSL-FRESRTQQIFQPAL      | DISSSESTnefILQII-----         | -----             | 1524 |
| Query_PARAM  | 1425 | -VinFE--QGNDQINNIIEY-----VTHLPEPLL [3]  | ---RAKNfEVSNLI-----KA         | -----S [1]        | 1467 |
| Query_SLEMN  | 1468 | AWfdID-----TPisNES--ARVLVKFLS           | --KLEIPN---ETLC--EwLTKK       | -----K            | 1506 |
| Query_STENT  | 1262 | ---sLI-----SKdsHEARKGNQLEPFL            | --KTkIEE--KQLR---TVLANS       | -----G            | 1299 |
| Query_NEMAT  | 1485 | GacrAA-VRTSGSIIVLSP--ASHQLACKLLELAF     | DLGIEVIT-IPRRAV--NILLIQM      | ICFLFSd----       | 1545 |
| Query_PISITI | 1521 | GV-kPS-LNVGLQTVILDP--ASQHLASKLLDLAY     | DLGLQFN-----YLMES             | IMEDSNdNp--G      | 1573 |
| Query_CORAL  | 1498 | GpivQD-SDV-FRIVMLTP--ASRELAkLLDLAF      | DLGLKIES-V-----L--HCILNKS     | CLADAKGS---S      | 1554 |
| Query_HYDRA  | 1437 | ---lSN-KEKV---SFLLP--AQMLLANSFLRVLV     | ElNPSAA---LTDLF-vNEKFS--      | -----QNTK----     | 1484 |
| Query_LATIM  | 1501 | GI--AP-GDERKSLPSIDI--SSKRLADGLLQLAF     | SFGLQSGE-LVCLLL--NRVTLVS      | PLSGTSQRnFIT      | 1563 |
| Query_SHRIM  | 1469 | GsifKE-QNLSVSGISPHP--SLLKFLYTVMLAI      | TLDPKVKhhLLSWAT--NSDTVSG      | TSQGVEVK----      | 1530 |
| Query_MCRAB  | 1468 | Nslfmy-GSAS---SPHP--TQLPFLYVLDFAV       | TLDSQVLEllVKQVT--NMEDVKG      | VTVQQIEK----      | 1525 |
| Query_AMPHI  | 1491 | DflifN-PSRSVAA-----APAFISHQITSFAS       | TA-----lHVAlQL--REETVSE       | VLELVIAA----      | 1541 |
| Query_BARNA  | 1389 | ScgrQp-----PTDPm--TVLRADTALETAL         | ALGVpARR--LsALLseQVVRAS [1]   | -----S            | 1437 |
| Query_COPEP  | 1439 | ---p-----EKTINKISpd--ILKNLEVFILQIL      | -VDESDEhIARLm---EIISD [1]     | -----             | 1463 |
| Query_DAPHN  | 1317 | GStgDS-----VSSA-VRLRASSLLLELAF          | -----LGLSM---EVLSE [1]        | -----RnPAN [5]    | 1383 |
| Query_STARF  | 1528 | SlttSD-EAGKLLQAMLTP--LSVLEAFSLDLDFAF    | LLGIBAKM-LVSCILL-dKTALESF     | R-----SS          | 1584 |
| Query_STRON  | 1515 | GlVkrG-ENGQEAR-KMTP--SEIDLQGRLELAF      | QLGvOTMS-LIDCLL-eTTPVvSS      | TRSLTSKLSASQ      | 1579 |
| Query_SEACU  | 1499 | AlrtSE-D-GRDVAVSLRP--AEIEELGTkLLELAF    | QMGVKVPI-LVDLLTkeDRKvVNS      | T-----TE          | 1555 |
| Query_FUNGI  | 1445 | -----YSLVNLQSLSP-----YGSVLVQLC          | NRFDVDTSDVVDKLFdat-IIOGG [6]  | GTMELGSvNVEA [7]  | 1501 |
| Query_DUPUR  | 1584 | -----NYLFNCEMLSP--SKLLISKELQLVFP        | TIG-IEPqKLLSMIIne--S-NT [6]   | DANNQGDG-EDS [4]  | 1649 |
| Query_HALBU  | 1568 | -----DYLNEHVDMITP--AHLIVYKELLVFLL       | STGHlQPSKLLLEyLLppIKVLTKS [6] | TSSITTDKqLEE [8]  | 1643 |
| Query_GLOBO  | 1377 | -----RSGTITISKSSDL--LQIQLARNMVWECI      | CNN-ESQEdAFSLIn-----          | -PPVSGTD----- [1] | 1425 |
| Query_PALUS  | 1429 | -----KLVCSLREETDP--STILVVGGLQVCL        | MHR-SSREYfPSEILc-----         | --LENEK----- [1]  | 1475 |
| Query_CALIF  | 1498 | -----NCLKEKLMENP--SYDLITKQLLDICI        | INS-EIQeCwGKLlgl-----         | --STMTDL----- [1] | 1546 |
| Query_GLOMU  | 1545 | -----KFPNNLRDVSdp--LWVELIRKLLSFL        | SLs-KYNGaINQWLLsdI----IG      | FPsDNSTF----- [1] | 1598 |
| Query_LOBOS  | 1477 | -----EYLFESHTKSLP--SKLLVFKLLELVP        | GER-QCRQLWDVYLL-----          | --DSEH----- [1]   | 1521 |
| Query_RACEM  | 1460 | -----DKFLEMRQSSDP--LRIKLVGDMVRVAG       | NSL-CSESPYCKRLLSnd--LS        | DP-----           | 1506 |
| Query_PVIOL  | 1570 | -----EYLFESHTKSLP--SKLLVFKLLELVP        | TIG-ISSDKLLSYIdp--TVKD [6]    | DMNNNSDK-MDT [8]  | 1640 |
| Query_BOMBU  | 1371 | AlvrE-SELGELYVTKP--SAKDYLEILMEF--       | SLIHYEFS-MTRMLI--EFIEND       | TMLGSd---KK [1]   | 1429 |
| Query_ABDES  | 1478 | GLkrE-RLEDELFPVDLTP--SVKRFPSCLLHI--     | VLLFKSTG-TMELLV--EFMLEN       | QKRLRYQsVNS [1]   | 1539 |
| Query_ANT    | 1390 | FlvSE-RIGLEVCrdLSM--RMIEYLRALMEFQF [5]  | TIIGNlLS-LTKKLE--ELIIND       | TPVTSVD--CT [1]   | 1455 |
| Query_WHITE  | 1423 | Slyds---NGTIVHLS-EDTDFLRLSFL--          | ATL--LDE-EVELLS--GFIFKT       | DQARLk--SLR [1]   | 1477 |
| Query_BEETL  | 1376 | QPaEd---KIIFLDDLQD--TTLsYCI TVLNY--     | SLE-DQN-EFKVfV--DYLKdK        | YKvOTTN--CKQ [1]  | 1431 |
| Query_THRIP  | 1385 | AivePvINSEHKAPVSLNP--TARMYAQsMLEF--     | YFS--TCP-ELNQLI--NNILDR       | SLPSQRD--LQC [1]  | 1444 |
| Query_TERMI  | 1452 | AlveG--QGDmKRTVVLQp--AAFSYAESLLKF--     | APL--LmK-EVTVVI--CCIKEQ       | ASIQNPA--THS [1]  | 1509 |
| Query_FLEA   | 1386 | GLieE--NTD'TDKIGIPehNVINYGKILSV--       | IP--EHVD-CKDILLI--ESVLND      | VHIGNI--TES [1]   | 1445 |
| Query_MIDGE  | 1440 | CvVeE--KINVKRPKLLTP--SAKAYASNIQL--      | CL--KIND-FLSTTV--TFSPND       | QMLMISQ--SS [1]   | 1496 |
| Query_LAODE  | 1430 | -VgqSD-----KAIKPnKSQTLYLELLDFAF [3]     | ---NKSNI'TKIECMcdetQKYED      | ---DDQSKnVTK      | 1489 |
| Query_LOTTI  | 1473 | GlyeEK-G-KLKKITLTP--AASLIGKSLDLSP       | KLGLKDNV-LITALL-nDDMIQK       | TPS-----VNL       | 1531 |
| Query_APLYS  | 1514 | GLvqTE-D-RTRTAATLSP--TAQTLANALLESL      | QLSFDVdK-LVAKIL-dKSSVQGA      | RKN-----IEI       | 1572 |
| Query_SCALL  | 1512 | GvVcRN-G-GGLEAITLTP--VVHTLMKMLALS       | HLGLQGSV-LVEAIL-dQTLVSGS      | SKG-----LEQ       | 1570 |
| Query_CRASS  | 1484 | SlicvE-G-GTKKSQTPSP--TAQVTATRMLELSP     | CLGVQIKK-VVMCIL-dESMVEGT      | ARG-----YsQ       | 1542 |
| Query_OCTOP  | 1454 | NivthS-DDNQLTSRTLTP--TELSLQTLLLELAI     | QLSMPINE-FM-AVM-fTEEAHQ       | NTSC-----         | 1510 |
| Query_POMAC  | 1492 | GiteKK-D-GKDKTvsLSP--AAHRFASQLLKLAF     | QLGLPAEK-LVEGIL-dIRIQLG       | SLG-----IEY       | 1550 |
| Query_WHIPW  | 1450 | ST-----SLLS--TKVGLAKRLLDIVP             | QSAAQIKS-LIHILAdcQPvRYLN      | FSSIATKR----      | 1500 |
| Query_TRICH  | 1458 | RI-----GLPP--SKLGMVKQIFRVAA             | LTGSADV-D-LIKLlMntESVRLAE     | CTSLCSTK----      | 1508 |
| Query_AASTA  | 1372 | ---AS-----GLLTP--MQDQLTRAMETAM          | ---DMGwdVATPIL-----           | -----QPTPAN       | 1409 |
| Query_ABUTE  | 1338 | ---KN-----NTRSP--IRDQIARTAMQTAI         | ---EMGwdLAsPIL-----           | -----KSDTEN       | 1375 |
| Query_PLASM  | 1434 | ---EY-----GHGSP--QDRLVVVAAALQAAA        | ---ASEWnITDIFL-----           | -----KsADRR       | 1471 |
| Query_BREMI  | 1420 | ---DH-----GNGAP--HDRLVIAAALKGAA         | ---ACGwITDIFL-----            | -----KPYDRQ       | 1457 |
| Query_OLIGA  | 1449 | ---GG-----ASVDP--NDRLLALEIKAGC          | ---FGGwGMTRVFD-----           | -----DRDLRR       | 1486 |
| Query_LIGNO  | 1553 | -----ESAQTQqHP--VLPQLIDAALTYAL          | NDSALLQP-LVTLIT-eHSAGLDL      | LNS---YKpCLT      | 1607 |
| Query_CESTO  | 1353 | NmlkE-----LTIPPd-----AMSKLISHVF         | -----TISTLF-----QYQVSF        | -----DKELIF [3]   | 1395 |
| Query_OVI2   | 1659 | AVhQVLdVIGLALASLDK-----TIIIEYLLDQLL [4] | ---NGSFQqhKLSSGLsdKTVcQLL     | -LWGRTEmpTRK [8]  | 1734 |
| Query_PRIAP  | 1501 | GctLSP-RDGVSSLTGMSP--SVRELGGRRMLRAF     | TMKVESDS-LLSLLF-dDTRLLGV      | SAK-----Q         | 1558 |
| Query_ROTIF  | 1492 | -----SQETESQTTTE--AKRKLFSCLsIN-         | -----RN-FLTKIL-----           | -----QnYLE        | 1529 |
| Query_SPONG  | 1499 | GissSP-GDGTfPY-YMPP--LHLKTELKLLKGL      | ELSDSVEP-FLLVL-----SP         | AQSGAGAS--FA      | 1555 |
| Query_TARDI  | 1507 | NS-----GSRKEAWISTDV--SQEK--ALFSLAL      | QCSSGAS-AAAFcI-----           | -----SSHSTQVsIYS  | 1556 |
| Query_TRICH  | 1479 | CF--RG-REMMGRDRTALSP--AQQKVAABELDLAF    | ELNETIDI-FPR-----YLLDET       | KLYGDSNsA--T      | 1535 |
| Query_OSTRE  | 1448 | GlghHA-----Npp--QRVvQAIVKLC [4]         | -----APNVLLDFLL-----          | -----DRRpPNS [4]  | 1494 |
| Query_NITEN  | 1560 | -----NLKRE-C--PP--PLRPVATAMELAT         | ALG-LSVGrLLDLVsdeSEVvSGG [8]  | TPPGMVR--         | 1620 |
| Query_CLUBM  | 1403 | -----TISKEPV--SP--LAEPLVVEIRLSV         | ALR-VVVDqLLRIVLdk----- [3]    | TVDRGTSd--        | 1452 |
| Query_MOSS   | 1489 | -----GIEQE-C--PP--SLQPIAEMVNLAM         | SLG-VNATfVLNlMde----- [3]     | GISTN-RK-----     | 1536 |
| Query_LIVER  | 1511 | -----QfGRE-F--PP--ILETIASEMVLSL         | ALG-TSVQfLVELCLde----- [3]    | SLPLQTRK-----     | 1559 |









Supplementary Figure 7: DNA-PKcs: All phyla - expanded list: COBALT

|              |      |                                  |               |           |            |                      |      |
|--------------|------|----------------------------------|---------------|-----------|------------|----------------------|------|
| Query_CAPIT  | 1794 | LDVVPYKIFS---QEG-R---FTNNQRRRAC  | EKVLSLMLRL    | VHSSA     | LTEFY      | CE---HIKEIM-K-II---  | 1847 |
| Query_LINGU  | 1796 | LDVVPFNIFT---KEG-L---FPNEIRRSSTL | SRVCPVLLRL    | CHQSS     | LSEFY      | VD---HIKFIT-D-TL---  | 1849 |
| Query_LIMUL  | 1783 | MDTLFGMFL---CEDQ---LPAEMKLGTTI   | ERVCPVLLRL    | LSKPV     | ITDFP      | VK---NIRSIM-E-IV---  | 1836 |
| Query_SPIDE  | 1783 | ADIVFSLIM---KSGFD---SKSDVLLKIV   | NKVLILVQN     | ISLTS     | FINFP      | LS---HIKEIM-K-TV---  | 1837 |
| Query_SCORP  | 1781 | AEVPLKMF---EDEL---YPSDMRIHII     | EKVFVILGM     | ISKIT     | LKYFF      | ID---HIKEIM-Q-IV---  | 1834 |
| Query_TICK   | 1711 | IEAALLNQ---STNQG---LLISARLSLA    | SKLLPLLLKS    | CSKPA     | LHRFF      | VD---NVTAMV-D-AV---  | 1765 |
| Query_MONOS  | 1701 | LRLEFVAV---DLTK---PEAARNALA      | HHVLPALLEG    | CDAAV     | RRDFY      | RE---EITAIT-A-ML---  | 1753 |
| Query_ROSET  | 1682 | IELMFQYV---AETNP1---FVRGVA       | QRVLATFLQA    | CKLSM     | CSAFY      | IK---RLPAIM---SL---  | 1733 |
| Query_BELCH  | 1824 | LIDIPYGFPR---REG-S---FPNEIRRSAL  | ERVCLPMLRL    | VHPAA     | LTEFF      | TD---HIREIM-D-II---  | 1877 |
| Query_CIONA  | 1793 | LEIPYTIPT---NSTQR---S-IPAAQTAI   | HN-VLVPMAQ    | CNVS      | VIQFF      | QT---NISHIM-S-VV---  | 1845 |
| Query_CAECIL | 1811 | LETVDHMFK---TENLW---S-NITRQIV    | DKSLLLIWH     | CSLDA     | LKEFF      | CK---IIHTM-D-TL---   | 1864 |
| Query_HUMAN  | 1798 | LESVEMFR---KDD-P---RLSFTTQSFV    | DRSLLTLWH     | CSLDA     | LREFF      | ST---IIVDAI-D-VL---  | 1851 |
| Query_MOUSE  | 1795 | LESVMTFR---KAD-L---PSNVTQAFV     | DRSLLTLWH     | COLDT     | LKEFF      | SR---IIVDAI-D-VL---  | 1848 |
| Query_XENOPU | 1820 | LNTLHNMFK---SESLM---L-NGTLQSLI   | DRCLLTLWN     | CSLDA     | MISFF      | TN---IISLAM-D-TL---  | 1873 |
| Query_PLATY  | 1802 | LEAVHMFQ---RDDHL---S-STTRQAFV    | DRSLLTLWH     | CSLDA     | LKEFF      | YR---IIVGAM-D-ML---  | 1855 |
| Query_TASDE  | 1805 | LDTVHRMFQ---KDD-L---S-NIPRLACV   | DRCLLTLWH     | CSLAA     | LREFF      | SS---IIVEAL-D-VL---  | 1857 |
| Query_CANAR  | 1800 | LDTVHKMFQ---SEELL---S-NAARQAFV   | DRSLLTLWH     | CSLDA     | LRVFF      | GK---IIVEAM-D-TL---  | 1853 |
| Query_OSTRIC | 1770 | LDTVHKMFQ---SEDLR---S-NVTQAFV    | DRSLLTLWH     | CSLDA     | LREFF      | GT---IIVQAM-D-TL---  | 1823 |
| Query_TURTLE | 1809 | LDTVHKMFQ---SEALL---S-NATQAFV    | DRSFLTLWH     | CSLDA     | LKDFP      | SK---IIVLEAM-D-TL--- | 1862 |
| Query_GECKO  | 1809 | LDTVHKMFQ---SETLL---S-SATQAFV    | DRSLLTLWH     | CSLDA     | LDDFF      | CK---IIVEAM-D-SL---  | 1862 |
| Query_DANIO  | 1809 | LSSTVQSFQ---AKEVP---S-NFMLGLI    | DRVLLPLASH    | CSPOA     | LSQFP      | IS---NIADIM-T-TL---  | 1862 |
| Query_SNAKE  | 1808 | LDTVHKMFQ---SETLH---S-NITRQAFV   | DRCLLTLWH     | CSLDA     | LKEFL      | SK---IIEIAM-D-TL---  | 1861 |
| Query_STERL  | 1821 | LDTVQMFQ---NDELH---S-NITRQAFV    | DRSLLTLWH     | CSLDA     | LKEFF      | CT---TVGDM-G-TL---   | 1874 |
| Query_MILII  | 1805 | LEAVHMFQ---NEGLL---S-NIARQAFV    | DRSLLTLWH     | CSLDA     | LKEFI      | SK---IIKDAM-G-TL---  | 1858 |
| Query_BAMBO  | 1804 | LEAAVEMFR---NEEML---P-NATQAFV    | DRSLLTLWH     | CSLDA     | LREFF      | CK---IVKAM-E-TL---   | 1857 |
| Query_ALLIG  | 1767 | LDTVHKMFQ---SETLL---S-NVTQAFV    | DRSLLTLWH     | CSLDA     | LKEFF      | SK---IIVVEAM-D-TL--- | 1820 |
| Query_GAR    | 1809 | LETVDHMFQ---AGELA---S-GAMRQAFV   | DRVLLPLVH     | CSLDA     | LRGFP      | CK---TIASVM-E-TL---  | 1862 |
| Query_TETRA  | 1768 | MEWALDQYK---NRQIDLSVDDNLRWAIM    | QVLLHLIEN     | AKEEA [1] | VKFM       | VKNSPVLEKLFYN-----   | 1826 |
| Query_PARAM  | 1672 | --LKWMLQIK-DEQLDtsTLNNVRIALG     | NKLLIPLSN     | --SNL     | LLEFY      | SE---PTPYLL-Q-QL---  | 1726 |
| Query_SLENN  | 1758 | FSQFDEFFM---NRQIDLSVDDNLRWAIM    | KIILKILES     | CSQEF     | LADIM      | IE---PTPOLE-I-VL--k  | 1815 |
| Query_STENT  | 1544 | FOTLLEMFY---DPNTDKgIIDNLRWGIA    | KRILIPMIDY    | ADELM     | IEKLM      | IY---CTQOM-I-C-KI--t | 1601 |
| Query_NEMAT  | 1793 | VDTVRIPT---N-ERD---HTSNVRLAVL    | DRVSVTLCN     | ASKAG     | VSEFF      | SS---HVKEIM-E-II---  | 1846 |
| Query_PISTI  | 1821 | MDVCLSIFF---N-ERD---YQTHSRAVI    | ERICITFLRK    | TSTTA     | RRAFY      | QD---QIQKL-S-VL---   | 1874 |
| Query_CORAL  | 1799 | LIDICDVFT---KKTPE---YRNLTRAAI    | DKVCLVLLRA    | SSTSV     | PREFY      | VD---HIRNIM-E-II---  | 1853 |
| Query_HYDRA  | 1720 | LDLVKMFN---DESKY---A-DDIRAVII    | DRVCIPPLNE    | VSWIS     | LKQFP      | QR---NILVPT-S-HI---  | 1773 |
| Query_LATIM  | 1809 | LDTVHKMFQ---DEGLL---S-NITRQAFV   | DRPTLIMLN     | CSIDA     | LKEFL      | CK---NILDVM-G-TL---  | 1862 |
| Query_SHRIM  | 1773 | LKHIVMYN---DPTCI---KQNL-RYNIM    | DLVTLPLQL     | AEAVP     | TQNFL      | LT---VISAVM-A-GM---  | 1826 |
| Query_MCRAB  | 1668 | LRVFDMYA---NQSHL---KQNL-RYNIM    | EKVLIPLLQL    | SLDVT     | TVSFS      | ID---VIKPV-A-GM---   | 1821 |
| Query_AMPHI  | 1791 | ASRVQVVE---AQEAS---GLQHRQLLN     | ERVLLSLRT     | ADVVS     | VERFF      | ER---HLKSN-N-LL---   | 1845 |
| Query_BARNA  | 1672 | AELLALFWP---AGGLPa---AGRRTL      | VSLFCPLLR     | ADRV      | LLQFY      | TshvVIARPVqd-PE---   | 1729 |
| Query_COPEP  | 1691 | ITVPTTIFI---DDSLF---SAQVRLSAG    | SRAVSPVOT [3] | --AT      | IRRFY      | SE---NMESLL-L-NV---  | 1745 |
| Query_DAPHN  | 1617 | LNRIVHAK---TSLINW---KTRFEAI      | ETLYTSLKA     | --LPS     | --SFV      | -Er---HVNELgd-II---  | 1666 |
| Query_STARF  | 1830 | FGVAYQIFC---QEN-S---FSKEIRRAAI   | ERVCIPLML     | AGVKA     | LSSFF      | KE---CIKNIG-G-II---  | 1883 |
| Query_STRON  | 1819 | ANIPPEIFK---QDK-R---YSKEIRKAAI   | QVVCIPLLR     | ASRDA     | TVTFY      | KG---HIDHI-S-VL---   | 1872 |
| Query_SEACU  | 1794 | IGTCLKIFQ---AEG-E---YTTQMRRAVM   | EKVCPLMFL     | COVDS     | VIEWF      | QR---NIRDFV-D-L---   | 1847 |
| Query_FUNGI  | 1740 | FASCSHFT---MESLQ---DQLRLHLV      | DLFCPLIKR [9] | MVEGL     | FAERI      | ST---IIGILN-H-TI---  | 1801 |
| Query_DUPUR  | 1890 | FSHCHEFLF---NHN---DELKITLI       | DKFCVPLSH     | MKEIE     | LVQIF      | SH---HLNLSM-S-II---  | 1940 |
| Query_HALBU  | 1891 | FSHCHEFLF---SNDYQ---DELKITLI     | DKFCVPLSH     | MKQVQ     | LIQLF      | AQ---HLSSLM-S-II---  | 1943 |
| Query_GLOBO  | 1662 | TKYGFPSV---QSKMS---HDLRWNA       | KLLLVTLQS     | COLDN     | LVRFF      | VQ---YIREIM-D-NL---  | 1714 |
| Query_PALUS  | 1714 | TSTLGFFF---DSSLP---MEVGRNVV      | LHMLPALSV     | APKAY     | VRAAF      | VR---HINQIM---TT---  | 1765 |
| Query_CALIF  | 1791 | TDYCMVELL---NKKAL---PLVRVNVV     | KQYLPALIH     | VNCQF     | KIKFY      | SK---HISLIT---KV---  | 1842 |
| Query_GLOMU  | 1846 | MDIAYGYPT---NSTYV---S-FQRIII     | EMILSPPLL     | GPKIF     | VMDFF      | KK---HINEI-D-L---    | 1897 |
| Query_LOBOS  | 1769 | TGYCFDEFI---KRTHS---DEHRNII      | HQILLPMLKA    | LPTLS     | VSEFY      | VL---NIARIM-G-VI---  | 1821 |
| Query_RACEM  | 1748 | TETCLAYK---DDGMR---IEVRRNVI      | SLVLSVFLH     | VPDDY     | VDDFY      | LD---NILFIMtG-AT---  | 1800 |
| Query_VIOL   | 1884 | FSHCHEFLF---SNDYQ---DELKITLI     | DKFCVPLIH     | MKEVT     | LVQLF      | CQ---NLTSFM-S-II---  | 1936 |
| Query_BOMBU  | 1669 | LQAAFKLFM---NLT-NE---RFDVL       | QRFLPSPEF     | CKTTE     | INKFF      | ET---NIKEIY-T---     | 1716 |
| Query_ABDES  | 1788 | KQI-PTKFR---EESLE---PNI-RLTML    | KRYLVTSLR     | CNVT      | IYTFY      | KL---YIKNIN-D-MI---  | 1839 |
| Query_ANT    | 1692 | LQTYDAFM---ETNTP---SETERLDIL     | REFLPAFKY     | CNAIA     | IERFF      | KK---NILDK-K---      | 1743 |
| Query_WHITE  | 1722 | LNVMFCAV---LPEPL---ENY-RENIL     | KTYLEPTLR     | CSIKS [4] | LKVFY      | EG---CIENLM-T-TV---  | 1778 |
| Query_BEETL  | 1665 | VKLYDLCLL---ED-L---DNF-QYKYL     | IIDTSSVQY     | CNLS      | FEDFF      | TE---TISTVL-T-VL---  | 1715 |
| Query_THRIP  | 1686 | LKLVFSMFE---NETIS---VEY-RAKIL    | NEFLKLMQF     | ASVTS     | QVSFS      | VS---TISKLV-K-RI---  | 1738 |
| Query_TERMI  | 1755 | IEAVKVFV---DDQYD---PSV-RLGCA     | QRVFRPLQG     | CRRSA     | AREFY      | RH---CIQDLQ-G-ML---  | 1807 |
| Query_FLEA   | 1685 | LRIPYQIK---SREYV---PSI-RVSI      | KRVLTILTS     | CRDQI     | IELFY      | KN---PFEEEDF-NnLI--- | 1738 |
| Query_MIDGE  | 1748 | NOT-PDEFIS---TNKCE---PEI-RLKFLV  | SRFLTIMKN     | SHVNV     | MKSFF      | -----IRQKM-N-LI---   | 1795 |
| Query_LAOBE  | 1722 | LDELVKFRN---DKILK---AHSRVKLV     | QDFMLPIES     | TSFKQ     | AEEFY      | LK---HIKDIV-V-SL-kd  | 1776 |
| Query_LOTTI  | 1776 | LIDIPYKIFP---SSG-S---YPSAIRIAAL  | SRVCLPMLRL    | VHSA      | VIEFF      | LT---HISFIM-S-EI---  | 1829 |
| Query_APLYS  | 1817 | LNVPYAFS---KEQ-S---YPHEIRWAAV    | ERVCLPMLRL    | SPRVT     | VIEFF      | SS---HIELI-N-NI---   | 1870 |
| Query_SCALL  | 1815 | VDVAYVFS---KES---YPAEIRATL       | HKVALPMLH     | CHKSA     | LIEFY      | LD---HMKELR-S-IT---  | 1867 |
| Query_CRASS  | 1785 | VDVAYNIFC---QEK-L---YPAEIRRTTI   | EKVALPMLH     | VHSA      | LIEFF      | TD---HMGDLR-T-TV---  | 1838 |
| Query_OCTOP  | 1745 | VQIPDFLF---KTQS---CTNNFRKFI      | KKVCLPMLR     | MSKIP     | FVEFL      | KS---NIPAVI-N-IV---  | 1798 |
| Query_POMAC  | 1791 | LDVYKIVF---CES-G---PQDMIRRTTL    | ERVCLPMLR     | VHSA      | LIEFF      | LD---HILDLM-R-IV---  | 1844 |
| Query_WHIPW  | 1741 | ADKLYSTFL---DASSCP---TEDYRSSVF   | SVFLPLLQC     | MDSAA     | LGHFA      | CS---HVSSIV-S-TL---  | 1795 |
| Query_TRICH  | 1749 | LELLDKMFF---NPSGCV---CASLRLLAL   | NEFFIPPLHS    | LKNDL     | LLTWT      | CR---KIQTLV-S-CL---  | 1803 |
| Query_AASTA  | 1642 | CLEVLPLVF---SPSLTD---HIRTTL      | RQVFPVLMHR    | LDEAA     | IVAVY      | TS-----TFS-G-AP---   | 1691 |
| Query_AEUTE  | 1600 | CEVLLQLLF---DFGLDD---YIRTVLH     | RQVFSRLVHR    | LEEAA     | IKLFL      | TM-----TSF-G-VP---   | 1649 |
| Query_PLASM  | 1735 | MAELLDLLL---DPNVdv---AIRKILL     | EEVFTPFVEC    | QTGEI     | LLHFY [8]  | ST-----I-S-LL---     | 1791 |
| Query_BREMI  | 1721 | LAELLEVLL---DSTLDV---SIRRVLL     | DEVFTPLEC     | QTGEV     | MLQFY [8]  | LS-----VI-S-VL---    | 1777 |
| Query_OLIGA  | 1740 | --ELLEVLV---DPVGD1---TVRRMLL     | ENLFPVLAEL    | QKADN     | LREFY [4]  | KTSK---VTMI-S-KL---  | 1794 |
| Query_LIGNO  | 1850 | WVPWLFPR---GDSGGGPTGFHREQLV      | SRVLPALTL     | CHGSV     | ATddc      | LEYCL-T-CLlna        | 1911 |
| Query_CESTO  | 1635 | LASSINYPGacPKSNpGPFISLWLRVY      | HKFLKPLLS     | VSPSA     | LERLA      | AQS---ITKWM-Q-TL---  | 1694 |
| Query_OVI2   | 1995 | LDLCHEQLIpsmHGKAh---QPVALDFV [4] | EKFFPEPLLS    | VSHTS     | --LEIF [1] | VN---HVNWL-G-VL--r   | 2056 |
| Query_PRIAP  | 1804 | ADSGYSILA---EEG-N---FPGEIRRSCL   | DNVVLRLR      | CCHHA     | VVEFF      | RC---HLVEI-G-II---   | 1857 |
| Query_ROTIF  | 1761 | VKQNSNFQ---SSD---DERKFLLF        | EKVIFPLKN     | CDKPV     | FIDFM      | SA---NIVSLI-E-VL---  | 1811 |
| Query_SPONG  | 1804 | LKFVVMFK---NDK-D---FPVAAVKIG     | ERLCPVLFTE    | CSSAV     | LREFF      | VL---KISVM-C-IM---   | 1857 |
| Query_TARDI  | 1809 | FEIPWKIFP---TQK---YGPDRRTAV      | EILLPLQEA     | ATSTA     | RMDFF      | SR---TMKDM-I-TL---   | 1861 |
| Query_TRICH  | 1781 | LDVPMKMFV---D-DKS---YRPDIRRAAI   | ERVCLPMLQK    | ASLKI     | TKDFY      | VS---HIKEIM-D-II---  | 1834 |
| Query_OSTRE  | 1746 | VADVADFR---TQSLA-----A           | SILLPTLEA     | ANAQE     | IVEFF      | Menh---ETIMkd-Vgg-   | 1793 |
| Query_NITEN  | 1876 | LELSITLLH---DGEKQ---PRLKKAVM     | DMVAVPALYA    | ADESF     | LSEWF      | AD---KPEDFK-R-TL---  | 1928 |
| Query_CLUBM  | 1698 | FSYCMDVLC---DATKL---PRLKKAVAL    | DYFVPLICL     | SPVDT     | LTGWF      | TP---RVTELM-D-SL---  | 1750 |
| Query_MOSS   | 1795 | FNLCITMIM---DRGKS---YELRRAVI     | EVIFEAFVNS    | SSMEF     | VTWVY      | SK---HISDLF-Y-VL---  | 1847 |
| Query_LIVER  | 1820 | LNLCIQLLG---DSTKL-----PQLRRAVI   | DRVVSLVNS     | ASPLF     | VADVY      | SK---RIKIV-D-AL---   | 1872 |



























Supplementary Figure 7: DNA-PKcs: All phyla - expanded list: COBALT

|             |      |                                                                                   |      |
|-------------|------|-----------------------------------------------------------------------------------|------|
| Query_CAPIT | 2627 | -DAAQFTQTQA-[2]SS--KGPYNWLT-QSSLDTFSDS[3]TLAT-QSES----SLMF[1]VGSS-----[4]SKK--    | 2685 |
| Query_LINGU | 2628 | -EIQQFTPTQG--AV--KAPYNWLT-QSSLDTFAEY[1]TQSM-ETQS----SLLF[1]VGTANENQTP[4]YKK--     | 2688 |
| Query_LIMUL | 2661 | -ANLQFTATMO-[2]AK--PKTYNWLT-QSSLDTFEQW[4]AMDASMGSSGS--SL--                        | 2720 |
| Query_SPIDE | 2619 | -VNIDFPETLVD[4]KK--RDTYNWLT-EKSLDTFAPO[2]SGDSGYSSFTN--SPVK[2]LFLALKNENKS----      | 2682 |
| Query_SCORP | 2638 | -DVREFTPTQD-[2]SK--KAFNWLT-QTSIDTLGDW[2]-----SSTSS--SL--                          | 2688 |
| Query_TICK  | 2544 | -AELQFTPTQRG[4]AAtTAGSFNWLT-QSTLESNLGG--AERRRS--LSLS                              | 2594 |
| Query_MONOS | 2586 | aSYYSFSQTSF--RgpAAPADSLR--SAQNTQTF-----TDSQRv--LLV[3]-----RPRA[3]-----            | 2636 |
| Query_ROSET | 2563 | -ASLAFPTPMAS-[1]TGTaATAATPEFGISGQTLTHT-----QYTAQOV--LLF                           | 2619 |
| Query_BELCH | 2677 | -DVLQFTATQ-[3]AP--KNAYNWLT-QSSLDTFADY[2]PLGT-ETQS----SLLF[1]TDASKVA--[2]RRLKP     | 2738 |
| Query_CTONA | 2646 | -KSLQFTATVE--GG--KSSYNWMT-GSSLDTFSSL-----AVGDHqkSLL[4]--TSPASYRR[4]LVTDK          | 2707 |
| Query_CAECI | 2654 | -QQYEFPTPQN-[1]GG--RNSFNWLT-GNSIDTLAEY[3]S--SSELS--SLLF                           | 2714 |
| Query_HUMAN | 2640 | -QQHDFTLTQT-[1]DG--RSSFDWLT-GSSDPLVDH[3]S-----SD----SLLF                          | 2695 |
| Query_MOUSE | 2636 | -QQYDFPTQA-[1]VE--RSSFDWLT-GSSIDLADH[3]S-----SETLsSLLF                            | 2695 |
| Query_XENOP | 2661 | -QHYQFTPTQN-[1]GG--RNSFNWLT-GSSMDTLADY[2]E--SPELPS----ALLF                        | 2720 |
| Query_PLATY | 2643 | -QQYEFPTPQN-[1]DG--RNSFNWLT-GSSVDFTFDY[3]T--SSELS-S----TLFF                       | 2702 |
| Query_TASDE | 2646 | -QQYEFPTPQN-[1]AG--RNSFNWLT-GSSIDTLADY[3]S--LSELS--SLLF                           | 2706 |
| Query_CANAR | 2643 | -RQYEFPTPQH-[1]SG--RNSFNWLT-GSSIDTLAEY[3]S--SSELS--SMLL                           | 2703 |
| Query_OSTRI | 2613 | -QQYEFPTPQN-[1]SG--RNSFNWLT-GNSIDTLAEY[3]S--FSELS--SMLL                           | 2673 |
| Query_TURTL | 2652 | -QQYEFPTPQN-[1]NG--RNSFNWLT-GSSIDTLAEY[3]S--SSELS--SMLF                           | 2712 |
| Query_GECKO | 2652 | -QQYEFPTPQT-[1]GG--RNSFNWLT-GNSVDTFAEY[3]S--SSELS--SMLL                           | 2712 |
| Query_DANTO | 2644 | -TSLFESQTLA-[3]GR--RSAYNWLT-GSSVDTLADY[2]--SSDSL-S----SLLV                        | 2703 |
| Query_SNAKE | 2641 | -QQYEFPTPQN-[1]SG--RNSFNWLT-GNSVDFTFN[3]S--SSEV--SMLL                             | 2699 |
| Query_STERL | 2661 | -AQLFETPQA-[1]GR--RNSFNWLT-GSSIDTLSEY[3]S--SADSV--SLLV                            | 2721 |
| Query_MILII | 2651 | -THYEFPTPQN-[1]DA--R--NFNWLT-GNSLDTFAEY[3]SLASEPGSS--SLLV                         | 2711 |
| Query_BAMBO | 2646 | -THYEFPTPQN-[1]GA--R--NFNWLT-GSSLDTFAEY[3]--FSESASS--SLLV                         | 2703 |
| Query_ALLIG | 2610 | -QQYEFPTPQN-[1]SG--RNSFNWLT-GSSIDTLSEY[3]S--SSELS--SMLF                           | 2670 |
| Query_GAR   | 2653 | -STLEFPTPQD-[1]GR--RASFNWLT-GSSVDTLSEY[3]A--TSDLS--SLLV                           | 2717 |
| Query_TETRA | 2699 | ---YSQSQD[2]GEmvIPSQDQAS--QMNQLEEK[5]DQMKRLVNPSSQI[18]--NKMSIS[4]ENEEG            | 2785 |
| Query_PARAM | 2584 | iQQSQYDEEFG-----RIPMKNSRSHLSQFLQA[1]EISFQQIQLTSnnQIRY[11]-----                    | 2641 |
| Query_SLEMN | 2649 | sNSNRNRQRPQI[4]IGs-QsVVEISdtQADGNFVRA[4]VFTQTQSDVSSLIASNF[20]-----                | 2746 |
| Query_STENT |      | -----                                                                             |      |
| Query_NEMAT | 2633 | -LRVFSPTMD-[3]S---QAFDNLN-PSS-QAD--S                                              | 2690 |
| Query_PISPI | 2676 | ---NLQFTPTQD-[3]S---TAFDNLN-PTQ-ESNLQP                                            | 2735 |
| Query_CORAL | 2650 | ---NPOFSMQT-[3]TGTaQTYDWLN-PSLDTSQSS                                              | 2712 |
| Query_HYDRA | 2550 | -KKLDFSQTH--I---ESSIDNMS-PTIQTPOEM                                                | 2593 |
| Query_LATIM | 2652 | -VQDFPTPQN-[1]GI--RNSFNWLT-GSSVDTFAEY[3]S--SSELS--SLLA                            | 2712 |
| Query_SHRIM | 2611 | -ANV-FSATAQAP                                                                     | 2671 |
| Query_MCRAB | 2605 | -ANV-FSATAQOT                                                                     | 2665 |
| Query_AMPHI | 2639 | -QRQ-FPTTQAA[4]GG-----TFDMCT-DASMQEVEVSF[2]LQDKANTVSOQsagLVP[1]LKTN---QAR[3]----- | 2700 |
| Query_BARNA | 2480 | -RSLAFPTPQRS--AasQPTFDWLT-----QTAAP                                               | 2520 |
| Query_COPEP | 2517 | -ATMEFSQTAQ-----GNLNNKTFV[1]NLSSNGTSPMSAR-----                                    | 2550 |
| Query_DAPHN | 2402 | SSAAAFSSQSP-----ANWLM---AETLSTE                                                   | 2425 |
| Query_STARF | 2686 | -DAQFTATQQL[4]SR--KNAYNWLT-GSQ-DTFADY[2]SSAS-DQSS----LLF[1]LGAKKMG-R[4]VSKTA      | 2751 |
| Query_STRON | 2679 | -ATQNFATQD-[4]SH--KNGYNWLT-GSQ-DTFADY[2]SSSA-SESS----LLF[1]MGSLLPKRTAQ[4]VKQ--    | 2742 |
| Query_SEACU | 2644 | -DGOQFTATQDL[4]DG--KNAYNWLT-GSQ-DTFASY[2]SLGT-ESS--SLLF[1]IGTKQKASVL[4]TKVKP      | 2711 |
| Query_FUNGI | 2599 | eESPSMSFTPPG[1]SSlGfASMSKQR--PAVSRKEDD                                            | 2653 |
| Query_DPURP | 2715 | -QAPQFTLQTA[1]SEfyPS-----SSQE--                                                   | 2750 |
| Query_HALBU | 2710 | -QLPMFSLTQSS[1]SQfyPSSSSSY--SELSSSQEQ                                             | 2764 |
| Query_LOBOS | 2485 | qE-MWVPTQDV[1]AKtTRIq--FSR--LQSE----                                              | 2520 |
| Query_PALUS | 2545 | qQ-VQWPTPLDT[1]IGpVQARDIFSG--SESE-----                                            | 2584 |
| Query_CALIF | 2610 | qKELSFPTIEM[1]TQfsYKPSYSQS--TLIVNFEIN                                             | 2662 |
| Query_GLOMU | 2681 | nEDLAFSLTLP[1]NadLGSQVAGYS--LTQSNLLFS                                             | 2735 |
| Query_LOBOS | 2614 | qSTFEFSMTLQ[1]ApaIRSQLGGAA--NPSSTLMFR                                             | 2662 |
| Query_RACEM | 2590 | qQELAFSKTQD[1]SGdtIASTFPAP--TPES---LS                                             | 2641 |
| Query_PVIOL | 2713 | -QTPQFTLQTA[1]REfyPS-----SNSQV                                                    | 2756 |
| Query_BOMBU | 2477 | -TSHNSQ-----LM--LQAT[1]DLDFEPTVYVNDT-SI-----                                      | 2507 |
| Query_ADEES | 2608 | -PGEEGS---LF-----EPTLDPSSIIT[1]PATSFPL-TQh-SLMF[1]INPFLIDR--RSRR                  | 2654 |
| Query_ANT   | 2512 | -TPTFSYRPLH-----GGLK--LRAT[1]DLQPEPTLDDDD--AADV[1]TTFNLSY--                       | 2556 |
| Query_WHITE | 2578 | ---SLEFAPTVAS-----DAVSDNFDPH[1]VTSSLNDSGVPS-SFDF[1]NTSKFKSR--[3]RKFPE             | 2631 |
| Query_BEETL | 2449 | -TSLEFAPTVQV-----R-----SKQFSQYTMSE--SLLF[1]KPEEKSFDV[4]NLSYK                      | 2495 |
| Query_THRIP | 2512 | -NSLIQPTQAD-----FPDGSDA[1]SATKLKSSLSRS-SFLF[1]QDQSSSK--[3]RGSFK                   | 2563 |
| Query_TERMI | 2590 | -ASLAFQPTIE-----QSG[1]SIGSLPSFLSS--SLLF                                           | 2633 |
| Query_FLEA  | 2509 | -FKSNIAKIPMI-----QATQEQEQL--[1]FAPTFPLQNTQp-----LDV--SHDT                         | 2547 |
| Query_MIDGE | 2564 | -LGNDTM---MF-----TPTQDPMILT[1]VSOQSNFQQTQn-SLLF[1]LKPQYLDm--RSRS                  | 2611 |
| Query_LAODE | 2583 | -QSLLEFPTVNP-----ADE[4]SVGSSSLHSPAVdATVS                                          | 2628 |
| Query_LOTTI | 2603 | -DVQ-FTATQD-[1]GS--NAPFNWLT-GSSLDTYGDY[1]SMSSSETPS--SLLF[1]VGTSGSQSTN[1]--R-Q     | 2660 |
| Query_APLYS | 2661 | -DVQFTATMD-[2]GA--GRVFNWLT-QSSLDTFPTD[1]VIGG--DS--QLLF[13]KGSLLKGRPS[4]MAAVR      | 2735 |
| Query_SCALL | 2662 | -DVQFTATQD--GS--RAPFNWLT-QSSLDTFPTD[1]TVGS-EPOS----ALLF[1]VGSMEASARI[3]RMR-P      | 2722 |
| Query_CRASS | 2623 | -DAQQFTATLD--AS--KAPFNWLT-GSSLDTFPTD[1]TVGS-ETSS--SLLF[1]VGTQDMALRT[4]KRR-P       | 2684 |
| Query_OCTOP | 2575 | -GNQFTPTQDV-----PFDWLT-QSSLSMMEV[4]SGIQSLLTVS--GKAT[2]SQVYPTKRPR[1]-----          | 2633 |
| Query_POMAC | 2623 | -DVEQFTATME-[1]GS--NAPFNWLT-QSSLDTFADA[1]LMET-NSLS--SLLF[1]VGSSSKGDAS[4]ATR-H     | 2685 |
| Query_WHIPW | 2556 | ---LLTPTAAE[4]GSp-----N--QSLTEFGSA[1]-----DESSGVLeMdaAL[4]-----                   | 2598 |
| Query_TRICH | 2567 | ---GFTPTAIT[4]NVg-----N--ISADTFELD[1]-----DESDDnLTVIL[4]-----                     | 2609 |
| Query_AASTA | 2419 | -----QDR-----VW-----                                                              | 2449 |
| Query_AEUTE | 2357 | -----QDP-----IW-----                                                              | 2387 |
| Query_PLASM | 2547 | -----E--                                                                          | 2582 |
| Query_BREMI | 2530 | -----A--                                                                          | 2565 |
| Query_OLIGA | 2564 | -----QQQ-----QWGSsTQSLDGLFDG[1]-----SASSQLiSSQA[1]SGSSSSQFAA[4]DGSQP              | 2615 |
| Query_LIGNO | 2814 | vPGPMFEATQLH[4]TA-----GLLA--DSQDLVST[3]FRSSGGGGGA--GLEV[12]LGSNDANPOMA[3]AQLHR    | 2892 |
| Query_CESTO | 2611 | -----QLLTQOI-----PSNSTSTQF-----DETLSDQsApRHVF[3]-----KPYK[4]IDFKN                 | 2657 |
| Query_OVI2  | 2965 | ---TAFPTTTRA-----DKTFATRIvTQSKTLTAG[3]IEASQMQTPVnkKART[13]VSOQPTPSE[4]ATPTP       | 3044 |
| Query_PRIAP | 2673 | -VVPEFTATQD-[2]GG--RSTYNWLTqSSIDTFADQ[2]SSVS--SIS--SSSS[1]PYSSPSAD--HH            | 2730 |
| Query_ROTIF | 2600 | -QTLQFQPTLKV-----YDWLT-QSSIDTFPTD-----ALIDTKS--SLLF                               | 2636 |
| Query_SPONG | 2662 | qQSLAFPTPQG--qESSYNWMT--PSAQSVDY[3]SFTVGATPTS--SLLF[1]-----[1]PTMRP               | 2715 |
| Query_TARDI | 2674 | -----FPTQA-----LA-GPANDTLAVA--GFTYSSQFaeSLLI                                      | 2705 |
| Query_TRICH | 2627 | sTNLQFTPTQD-[3]R--N--NWLD-PSSVDKSIQS[5]Q--QSLSTSSetSSTLL                          | 2692 |
| Query_OSTRE | 2585 | ---LSYKPKVKRL--pKSAYRAKD--VSSTLHKT-----SfSAVI                                     | 2616 |
| Query_NITEN | 2729 | tQTGGRTOOQL[1]PgmIRATQGPS-----QSLSQGG                                             | 2781 |
| Query_CLUBM | 2488 | -ANASLAVNHG[1]GGLIRATASyT-----PSMTILE                                             | 2534 |
| Query_MOSS  | 2611 | -RDGEFDGATHH[1]PmIRATMTPS-----LSQAVTQ                                             | 2657 |
| Query_LIVER | 2647 | -NSKEDDEMIPI[1]AGmIRATYTTAT-----LSQTQDT                                           | 2689 |



Supplementary Figure 7: DNA-PKcs: All phyla - expanded list: COBALT

Table with 5 columns: Query name, ID, E-value, Alignment, and Accession. The alignment column shows the sequence alignment between the query and the reference sequence, including gaps and mismatches. The accession column lists the source database IDs for each query.





























Supplementary Figure 7: DNA-PKcs: All phyla - expanded list: COBALT

|             |      |              |                       |                             |                       |      |
|-------------|------|--------------|-----------------------|-----------------------------|-----------------------|------|
| Query_CAPIT | 3661 | SQWLAEFQA-G  | NHEASLEIPG-QYT        | GEVC-PLPEYH-AKISSFDSQVTV    | LRLSLRMPKSIVIRGNDEKEY | 3725 |
| Query_LINGU | 3675 | SKWMSGAA-Q   | DMDLSLEIPG-QYT        | GLSK-PMPEYH-VKIAGFDSRVLV    | LSSMRKPKRITINGTDMKDH  | 3739 |
| Query_LIMUL | 3717 | SLWLSDPHF-P  | KYQDELEIPG-QYT        | GTAQ-PIPEYH-VKVSFGDQVRI     | LNSLTRPRTLTIRGNDEKEY  | 3781 |
| Query_SPIDE | 3649 | SPWLNEFQO-W  | KYSSQIEIPG-QYT        | GRSK-PLPEYH-VKIAGFDQKVLV    | LSSLTAPRRTIRGNDEKEY   | 3713 |
| Query_SCORP | 3670 | SPWLSEPHS-I  | KYSEDIIPG-QYT         | GKRK-PIPEHH-VKICNFDQKVDI    | LSSLTKPRCLTIRGNDEKEY  | 3734 |
| Query_TICK  | 3498 | SPWLSRPSA-L  | DRDNKLEIPG-QYT        | GRSK-PMPEYH-VNIFGFESVLV     | LKSMQRPCRTIRGNDEKEY   | 3562 |
| Query_MONOS | 3716 | APQLAESMPTG  | 3]----LVEVPG-QYG[3]   | --SM-PDVQSH-VMLCGFDSRVLV    | LKSIIRRPKRVMLGSDEREY  | 3780 |
| Query_ROSET | 3665 | SPWLSKYRSPG  | 3]----DIIEIPG-QYG     | GTEM-PIPEEH-AKIEGFDEKLLI    | MASIRRRPRLTFRGSDEREY  | 3729 |
| Query_BELCH | 3759 | CPWLSDPNP-L  | DYDRELEIPG-QYT        | GKVK-PLMQYH-AKIAGFDQRVKM    | MSSLRKPVRITIRGNDEKEY  | 3823 |
| Query_CIONA | 3703 | SPWLANFKPS-L | RSSKLEIPG-QYD         | GKSR-PLPEYH-ATITGFDQVTKM    | MTSIRKPKRIIMRGSNEKDF  | 3768 |
| Query_CAECI | 3703 | SPWMSNFKP-E  | FLRHELEIPG-QYN        | GRSK-PLPEYH-VKISGFDNRVKV    | MSSIRKPKRIILGNDEKEY   | 3767 |
| Query_HUMAN | 3684 | SPWMSDFKV-E  | FLRNELEIPG-QYD        | GRGK-PLPEYH-VR IAGFDER-TV   | MAFLRRPKRIIRGHDEREH   | 3748 |
| Query_MOUSE | 3684 | SPWMSFKP-Q   | FLKNELEIPG-QYD        | GKSK-PLPEYH-VRISGFDNRVKV    | MLSLRKPKRIVIRGHDEKEY  | 3748 |
| Query_XENOP | 3701 | SPWMSFKP-E   | FLRNELEIPG-QYS        | GRSK-PMPEYH-VKISGFDNRVSV    | MASIRKPKRIIRGHDEKEY   | 3765 |
| Query_PLATY | 3691 | SPWLSDFRV-E  | FLRSELEIPG-QYD        | GKGG-PLPEYH-AKITGFDNRVKV    | MASIRKPKRIIRGHDEKEY   | 3755 |
| Query_TASDE | 3696 | SPWMSFKP-E   | FLRNELEIPG-QYD        | GRGK-PLPEYH-AKITGFDNRVKV    | MASIRKPKRIIRGHDEKEY   | 3760 |
| Query_CANAR | 3692 | SPWMSFKP-E   | FLRSELEIPG-QYD        | GKGG-PLPEYH-AKITGFDNRVSV    | MESLRKPKRITIRGSDEREY  | 3756 |
| Query_OSTRI | 3662 | SPWMSFKP-E   | FLRSELEIPG-QYD        | GKGG-PLPEYH-VRISGFDNRVKV    | MESMRKPKRITIRGSDEREY  | 3726 |
| Query_TURTL | 3700 | SPWMSDFKA-E  | FLRNELEIPG-QYD        | GKSK-PLPEYH-AKITGFDNRVKV    | MESIRKPKRINIRGSDEREY  | 3764 |
| Query_GECKO | 3702 | SPWMSFKP-E   | FLRNELEIPG-QYD        | GKGG-PLPEYH-AKITGFDNRVKV    | MLSIRKPKRIIRGHDEKEY   | 3766 |
| Query_DANTO | 3678 | SPWLSFKP-E   | TLRNELEIPG-QYD        | GKSK-PLPEYH-AKITGFDNRVKV    | MTSIRRPRRTIRGNDEKEY   | 3742 |
| Query_SNAKE | 3687 | SPWMSFKP-E   | FLRTELEIPG-QYD        | GKGG-PLPEYH-AKITGFDNRVKV    | MQSMRKPRIIRGHDEKEY    | 3751 |
| Query_STERL | 3709 | SPWMSNFKP-E  | FLRNELEIPG-QYD        | GKCK-PLPEYH-ARITGFDNRVKV    | MSSMRKPKRILMRGNDEKEY  | 3773 |
| Query_MILII | 3699 | SPWMSNFKP-Q  | FLRNELEIPG-QYD        | GKCK-PLPEYH-AKITGFDNRVKV    | MSSIRKPKRIIRGHDEKEY   | 3763 |
| Query_BAMBO | 3693 | SPWMSFKP-E   | YLRNDELEIPG-QYD       | GKSK-PMPEYH-AQITGFDNRVKV    | MSSIRKPKRIIRGHDEKEY   | 3757 |
| Query_ALLIG | 3659 | SPWLSFKP-E   | FLRNELEIPG-QYD        | GKGG-PLPEYH-AKITGFDNRVKV    | MESLRKPKRIIRGHDEKEY   | 3723 |
| Query_GAR   | 3706 | SPWLSNFRP-E  | TLRNELEIPG-QYD        | GRSK-PLPEYH-VKITGFDNRVQS    | LRSIRKPKRIIRGHDEKEY   | 3770 |
| Query_TETRA | 3912 | SSFLNQFQAdH  | 1]----IEIPG-QYT[5]    | --TE-PYKESH-IKIQSFDSQILV    | LQSIIRKPKRIIRGHDEKEY  | 3976 |
| Query_PARAM | 3515 | SRWFQNFQAdH  | 6]----QTEILP-I-QLS    | GMNEFDIQMIP--KIASFDQGMVLV   | LSSIRKPKRIIRGHDEKEY   | 3584 |
| Query_SLEMN | 3778 | SEWLSDFDND   | 4]----SEYIEIPG-QYE[2] | --KSE-PLIEKN-VKIASVKRTLLI   | LGSIRRPRRTIRGHDEKEY   | 3846 |
| Query_SMENT | 3200 | SEWLDAYGL-D  | 4]----NS-IEVPG-IFT[1] | --DQE-PFKRNS-VSITSFDSQILV   | LSSAKKPKRIIRGHDEKEY   | 3265 |
| Query_NEMAT | 3676 | SPWLNFAQA-D  | 3]----SHAQLEIPG-QYT   | QOSK-PMPEYH-VKIAGFDEKVLV    | LASIRKPKRVTIRGNDEKEY  | 3740 |
| Query_PISIT | 3728 | SPWLSRFQS-N  | NFTHTLEIPG-QYK        | GKTK-PLPEYH-VKIVGFDNRVKV    | LPSIRKPKCLIRGNDEKEY   | 3792 |
| Query_CORAL | 3702 | SPWLANFQT-Q  | SETIQLEIPG-QYS        | QOSK-PLPEYH-VKIVGFDNRVKV    | MSSLRKPRIIRGHDEKEY    | 3766 |
| Query_HYDRA | 3531 | SPWLSFPQD-P  | SFLDRLEIPG-QYT        | GESK-PIVEYH-VKINGFDEKVLV    | MNSLRKPKRITIRGNDEKEY  | 3595 |
| Query_LATIM | 3700 | SPWMSQPKP-E  | FLRNELEIPG-QYD        | GKSK-PMPEYH-AKITGFDNRVKV    | MASIRKPKRIIRGHDEKEY   | 3764 |
| Query_SHRIM | 3639 | SPWLANFQA-S  | KYSEVLEIPG-QYT        | GMSK-PLPEYH-VKISSFDNRVLL    | MSSMRVPMRIIRGHDEKEY   | 3703 |
| Query_MCRAB | 3630 | SPWLANFQA-S  | KHSDVLEIPG-QYS        | GVSJ-PLPEYH-VNISFDNRVPM     | MQLRPLRIVIRGNDEKEY    | 3694 |
| Query_AMPHI | 3668 | SPWLSFPQS-N  | QYSDRIIPG-QYS         | GFSK-PNVEHH-PCISSVDNMLV     | LKSLRSPVLMHADDEKEY    | 3732 |
| Query_BARNA | 3425 | SGWLSFQDvN   | 1]----QERLEIPG-QYT    | RRRR-PQPDYH-VRVANLSDEALV    | LNSIRPVRTIRGNDEKEY    | 3489 |
| Query_COPEP | 3458 | SAFLANFLASD  | 2]----QTVVPG-QYT      | GFSR-PDTRRH-TISSFDEPGLNV    | FPSSLRPMKISMLGSDGNRY  | 3522 |
| Query_DAPHN | 3258 | SPWLANVRIDd  | 3]----NLLLEIPG-QYT[1] | --KGG-----TLKVEVTRDEIQV     | LQSKQLPRLTIRGNDEKEY   | 3315 |
| Query_STARF | 3749 | STWFSDFQO-L  | SYDRELEIPG-QYK        | GKSK-PLPEYH-VKIAGFDNRVKV    | LSSMRKPKRIVIRGNDEKEY  | 3813 |
| Query_STRON | 3731 | SPWFTAFQT-L  | RGD-ELEIPG-QYD        | GSKK-PLPAYH-VKIAGFDNRVLT    | LSSLKPKCITIRGNDEKEY   | 3794 |
| Query_SEACU | 3704 | SPWFLQYQ-L   | TEQAQFEIPG-QYT        | GVSJ-PLPEYH-VKIAGFDNRVPT    | LQSLKPKRITIRGNDEKEY   | 3767 |
| Query_FUNGI | 3552 | SSWLQNFQD    | 1]JGNGSSIEIPG-QYS     | GTRI-PVPSEH-VKITGFDNRVSV    | MGLSKPKRIVIRGNDEKEY   | 3618 |
| Query_PURP  | 3717 | SYWLNDFDRSd  | 1]PYSKQLEIPG-QYN      | GFGK-PQPEH-VTISFDSQILV      | MGLSKPKRITIRGNDEKEY   | 3783 |
| Query_HALBU | 3710 | SNWLVEFDRSd  | --QLTEIEIPG-QYH       | GTSK-PQPEH-VKISFDPNMLV      | MGLSKPKRITIRGNDEKEY   | 3774 |
| Query_GLOBO | 3444 | SLWLSDFQgN   | 1]DPTEYLEIPG-QYT      | GTSE-PNISQH-VLISNFDNRVSV    | MSSMRPKRITIRGNDEKEY   | 3510 |
| Query_PALUS | 3513 | SPWLNFNARD   | 1]N---EELIEIPG-QYE    | GLAM-PRPQH-VKIVSFDNRVSV     | MSSMRPKRITIRGNDEKEY   | 3577 |
| Query_CALIF | 3620 | SNWLSEFGKd   | 1]D---REIEIPG-QYD     | GKYN-PLRKH-KMISFDSQILV      | LNSLRKPKRIIRGHDEKEY   | 3684 |
| Query_GLOMU | 3636 | SAWLAEYSSSS  | 1]E---KEIEIPG-QYD     | GLLSIPDPKH-VKISFDPNMLV      | LRLRKPRIIRGHDEKEY     | 3701 |
| Query_LOBOS | 3609 | SPWLHAFQASd  | 1]D---GVIDIPG-QFS     | GLTP-PNSQQT-ATVRFDRVLV      | MSSIRKPKRISIRGNDEKEY  | 3673 |
| Query_RACEM | 3592 | SPWLSFQASd   | 1]N---ESIIEIPG-QYS    | GLSR-PYPEYH-ARISFDRMLV      | MSSLRKPKRITIRGNDEKEY  | 3656 |
| Query_PVIOL | 3709 | SFKLAEFDRSd  | 1]SSSQEMIEIPG-QYS     | GVGK-PQPDH-VKISFDPNMLV      | MGLSKPKRITIRGNDEKEY   | 3775 |
| Query_BOMBU | 3417 | SPWLCNPF---P | ERDV---IEIPG-QYT      | GNRK-PMPQYH-AKIKFDSNRIV     | MSSMRKPKRITIRGNDEKEY  | 3477 |
| Query_ABDES | 3559 | SPWLFYHFS    | REEM-LEIPG-QYN        | IDHK-PNVCNH-VKIVKCTELEL     | FKTLRNPRIIRGNDEKEY    | 3623 |
| Query_ANT   | 3491 | SPFLHKVFGSS  | SDGI---IEIPG-QYT      | GEKE-PEPRYH-VRVRFDEPQVSV    | MQLSRKPKRITIRGNDEKEY  | 3554 |
| Query_WHITE | 3552 | SPWLFYHFS    | YSS-IEIPG-QYS         | GKMR-PDLKNH-VRVRFDEPQVSV    | MQLSRKPKRITIRGNDEKEY  | 3616 |
| Query_BEETL | 3387 | CPWLANFSAK   | NNLE-IEIPG-QYD        | GERI-PLVQH-VKISGFDNRVSV     | MSSLRKPKRITIRGNDEKEY  | 3451 |
| Query_THRIP | 3474 | SPWLANFSSSS  | KNIC-IEIPG-QYT        | GDQK-PNPRH-VRVRFDEPQVSV     | MPSIRKPKRITIRGNDEKEY  | 3538 |
| Query_TERMI | 3556 | SPWLSFQGGK   | HCFLLEIPG-QYT         | GESK-PLIQH-VKIAGFDNRVSV     | MKTLRPLQVTFGSDAKH     | 3621 |
| Query_FLEA  | 3465 | CPWLANFPT-pQ | DVSA-LEIPG-QYQ        | GHKK-PLPHYH-AKIRFDRQITV     | LQSLRPLVIGYSSDGEY     | 3528 |
| Query_MIDGE | 3581 | CNWFAYEKWcG  | ENDF-IEIPG-QYV        | GDRK-PFIEQH-VKIVRFDRTRLV    | FRSQKQPIEIKMYSDGKEY   | 3645 |
| Query_LAODE | 3533 | STWFSNSYQSLP | ---HRIIEIPG-QYS       | GDNM-PVAADKI-VKISKFSDFRFTV  | MSSLRKPKRITIRGNDEKEY  | 3596 |
| Query_LOTTI | 3639 | CQWLANFNP-N  | RDSRELEIPG-QYD        | GLSK-PLPEYH-VKIVGFDNRVSV    | MSSLRKPKRITIRGNDEKEY  | 3703 |
| Query_APLYS | 3744 | CPWMAEFNP-S  | HNGRELEIPG-QYR        | GLDK-PLPEYH-VRVGFDRVSV      | MKSLRKPRIIRGHDEKEY    | 3808 |
| Query_SCALL | 3729 | CQWLANFNP-N  | TEGNNLEIPG-QYT        | GLTK-PLPEYH-VKIAGFDNRVSV    | MSSMRKPKRIVIRGNDEKEY  | 3793 |
| Query_CRASS | 3677 | CQWLANFNP-S  | IQQKLEIPG-QYD         | GVKK-PMPEYH-VKIVGFDNRVSV    | MTSIRKPKRITIRGNDEKEY  | 3741 |
| Query_OCTOP | 3593 | SSWMAFNP-L   | L---DTLEIPG-QYH       | GFSK-PLLEYH-VKISGFDNRVSV    | FRSLQKPKRIIRGNDEKEY   | 3655 |
| Query_POMAC | 3680 | CQWMAFNP-N   | HESRELEIPG-QYD        | GLRK-PMPEYH-VKIVGFDNRVSV    | MSSLRKPKRITIRGNDEKEY  | 3744 |
| Query_WHIPW | 3532 | SLWMPFYSS-T  | DSGHLLEIPG-QYT        | GDRK-PLPEYH-VTISGFDNRVSV    | ISSLRKPKRITIRGNDEKEY  | 3596 |
| Query_TRICH | 3535 | SPWLANFYRNP  | PMDFLEIPG-QYS         | GDRR-PFPERH-VHII GFASDIEI   | MRLSKPKRITIRGNDEKEY   | 3599 |
| Query_AASTA | 3336 | SPWLANQDVPK  | 1]----RIEIPG-QYT[3]   | --GK-PEPATH-TYILSCDPQLMV    | LPSKQLPKRILHASDERTY   | 3399 |
| Query_AEUTE | 3263 | SPWLANQDVPK  | 1]----RIEIPG-QYT[3]   | --AK-PDPSTH-TYILSCDPQLMV    | LPSKQLPKRILHASDERTY   | 3326 |
| Query_PLASM | 3525 | AEWLQEFDSHs  | 1]----ILEIPG-QYT[3]   | --GP-PDPATH-VRILSFDNMLV     | LASKQLPKRITIRGNDEKEY  | 3588 |
| Query_BREMI | 3508 | AEWLQEFDSHs  | 1]----SLEIPG-QYT[3]   | --GP-PDSSKH-VKILSFDNMLV     | LASKQLPKRITIRGNDEKEY  | 3571 |
| Query_OLIGA | 3561 | ADWLDFDHIK   | 1]----RLEIPG-QYT[3]   | --GK-PDLSNH-TYILSVAQILV     | LVSQKLPKQITFHCSDERTY  | 3624 |
| Query_LIGNO | 3962 | STWLAEFAATE  | HGDAYLEIPG-QYQ[7]     | SLAK-PQPELH-TRVAGFDNRVSV    | MSSLRKPKRITIRGNDEKEY  | 4034 |
| Query_CESTO | 3756 | SHWLANFSSdG  | --RDYIEIPG-QYQ[4]     | STTK-----RLITIERIDPNVKV     | LPSLRKPKRILHASDERTY   | 3819 |
| Query_OVI2  | 4203 | SPWLSFSSNd   | 3]---AQFLSVPSaQYS[6]  | --LAQ---RVH---IFRFGSLNL[24] | LVLRLKPKRITIRGNDEKEY  | 4294 |
| Query_PRIAP | 3707 | STWLDPHFS-S  | PATCQIEIPG-QYR        | GRSK-PMPEYH-VKIAGFDNRVSV    | MKSLRKPRIIRGHDEKEY    | 3771 |
| Query_ROTIF | 3623 | SAWLKGFK--R  | NITKDIIEIPG-QYN       | GNK-PMPEYH-VKIESFDRILE      | MSSLRKPKRITIRGNDEKEY  | 3686 |
| Query_SPONG | 3723 | SPWLDTPRO-E  | DYLQVIEIPG-QYD        | GRSK-PLPEYH-AKITRFDQVLT     | LSSLRKPRIIRGHDEKEY    | 3787 |
| Query_TARDI | 3660 | NPWLANFPTS-L | QYGRALEIPG-QYD        | GRER-PRPETH-VKISFGDNRVSV    | LASIRRPRRTIRGNDEKEY   | 3724 |
| Query_TRICH | 3689 | CPWLANFQA-A  | NFTYSIEIPG-QYT        | GRSK-PLPEYH-LKISGFDNRVSV    | LKSIIRKPKRITIRGNDEKEY | 3753 |
| Query_OSTRE | 3501 | SSWFLMHSs    | --EQVLEIPG-QYD[4]     | ----PPDASKhVTVMGFADPQVI     | FASKQPKRITIRGNDEKEY   | 3565 |
| Query_NITEN | 3832 | SKWLANFVQSR  | [2]SDAGGIEIPG-QYK     | GFRC-PDPSSH-VTIVGFDNRVSV    | FSSIRKPKRITIRGNDEKEY  | 3919 |
| Query_CLUBM | 3461 | SKWMAFDPQr   | [9]----IEIPG-QYD      | GLQC-PDVSSH-TIVGFDNRVSV     | LSSKQPKRITIRGNDEKEY   | 3530 |
| Query_MOSS  | 3616 | SKWLANFDPQc  | [10]KNEMQIEIPG-QYN    | GSSI-PNLSTH-VQLGFDNRVSV     | LSSKQPKRITIRGNDEKEY   | 3691 |
| Query_LIVER | 3672 | SKWMAFDPQc   | [22]SSEGQIEIPG-QYA    | GFRE-PPSPDLH-VKILGFDNRVSV   | LSSKQPKRITIRGNDEKEY   | 3759 |







Supplementary Figure 7: DNA-PKcs: All phyla - expanded list: COBALT

|             |      |                                                                     |                    |         |       |      |
|-------------|------|---------------------------------------------------------------------|--------------------|---------|-------|------|
| Query_CAPIT | 3932 | FLD-IPELIPFRMTRQLRNLPLR--EKGVIEGTMVHSLRALRQKHEQLISTMDVFIKEPSL-DWQNA | KKEIQA             | 4003    |       |      |
| Query_LINGU | 3941 | FLP-VEPLMPRLTRQILNVMPLR--EKLIESTMVHARALRANVDLLNTMDVFKDLSV-DWLAF     | EKQLQT             | 4012    |       |      |
| Query_LIMUL | 3980 | FLP-VEPLIPRRLTPQYLNLMLPLK--EKGLYEATMIHTLNALRKNHDLNFMDFVFIKEPTL-DWKN | QKQRNE             | 4051    |       |      |
| Query_SPIDE | 3916 | FLP-VEPLVPRRLTPQYLQMLAPLK--VKGLYAATMIHALKAISTKRDLNVMDFIKEPTL-DW     | NKQKQT             | 3987    |       |      |
| Query_SCORP | 3938 | FLP-VEPLVPRRLTPQYLNLMLPLK--EKGVIEATMISALSALRDNADILLNTMDIFIKKEPTV    | NWQENA             | 4009    |       |      |
| Query_TICK  | 3752 | FLP-VEPLMPRRLSPQYGLLEPLG--KEGPLASAMQDALRALRAGAESILDVLDVVFQVETV-D    | WMRLA              | 3823    |       |      |
| Query_MONOS | 3982 | FLP-VEPLMPRRLTRIMEQALQPH--RNGLIKHVMSVLTALKARRSDLLAVIQFATEPTL-DW     | QNA                | 4053    |       |      |
| Query_ROSET | 3936 | ELP-IEPMLIPRRTKQLEAVFLPHK--KEGLVQEVMSVHLRALKANQRLLSSTMDVFIKEPSL     | -EWQQA             | ----R   | 4002  |      |
| Query_BELCH | 4030 | HLP-VEPLMPRRLTRQMLNLLPLK--ESGLLQSTMVHSLRALRSSPNVINTMDVFIKEPSL       | -DWKNF             | ---AAK  | 4097  |      |
| Query_CTONA | 3967 | VLP-VEPLVPRRLTRQIINLLSPHS-aIHGELRHVMVRLSALRSRTDTILPLLDVFKDPSV-D     | WAKFG              | KRSRDQ  | 4039  |      |
| Query_CAECI | 3967 | FLP-VEPLMPRRLTRQVQLMLPMK--ESGLIESVMHARALRATDPSLLITMDVFKDPSL-D       | WNFM               | LKQLKK  | 4038  |      |
| Query_HUMAN | 3952 | FLP-VEPLMPRRLTRQFINLMLPMK--ETGLMYSIIVHALRAFSSDPGLLNTMDVFKDPSF       | -DWKNF             | QKMLKK  | 4023  |      |
| Query_MOUSE | 3952 | FLP-VEPLMPRRLTRQFVSLMLPMK--ETGLMCTVMHARALRAFSCAGLLTMDTFVFKDPSF      | -DWKSF             | QTMRLK  | 4023  |      |
| Query_XENOP | 3970 | FLP-VEPLMPRRLTRQIVNMLPMK--DSGLFDSVMHSLRALRSDPGLLNTMDVFIKEPSL-D      | WKNLE              | LKQMKK  | 4041  |      |
| Query_PLATY | 3959 | FLP-VEPLMPRRLTRQILNMLSPMK--ESGLVYSVMHARALRAFSDPGLLNTMDVFKDPSL       | -DWKNF             | TKMLKR  | 4030  |      |
| Query_TASDE | 3964 | FLP-VEPLMPRRLTRQFINLMLPMK--ETGLIYSVMHARALRAFSDPGLLNTMDVFKDPSL       | -DWKNF             | QKMLKK  | 4035  |      |
| Query_CANAR | 3960 | FLS-VEPLMPRRLTRQFINMLMPVK--EWGLIYSVMHARALRAFSDPGLLNTMDVFKDPSL       | -DWKNF             | QRQLKK  | 4031  |      |
| Query_OSTRI | 3930 | FLP-VEPLMPRRLTRQFINMLMPVK--EWGLIYSVMHARALRAFSDPGLLNTMDVFKDPSL       | -DWKNF             | QRQLKK  | 4001  |      |
| Query_TURTL | 3968 | FLQ-VEPLMPRRLTRQFINLMLPMK--ESGLIYSVMHARALRAFSDPGLLNTMDVFKDPSL       | -DWQNF             | LKQLKK  | 4039  |      |
| Query_GECCO | 3970 | FLP-VEPLMPRRLTRQFINLMLPMK--ETGLIYSVMHARALRAFSDPGLLNTMDVFKDPSL       | -DWKNF             | LKQLKK  | 4041  |      |
| Query_DANTO | 3943 | FLP-VEPLMPRRLTRQFINMLPLA--ESGLIQSVMHARALRAFSDPGLLNTMDVFKDPSL        | -DWKNF             | LKQLKK  | 4014  |      |
| Query_SNAKE | 3954 | FLQ-VEPLMPRRLTRQFINMLPMK--ESGLMYSVMHARALRAFSDPGLLNTMDVFKDPSL        | -DWKNF             | LKQLKK  | 4025  |      |
| Query_STERL | 3974 | FLP-VEPLMPRRLTRQFINLMLPMK--ESGLIYSVMHARALRAFSDPGLLNTMDVFKDPSL       | -DWKNF             | LKQMKK  | 4045  |      |
| Query_MILII | 3965 | FLP-VEPLMPRRLTRQILNMLPMK--ESGLIRISIMVHARALRAFSDPGLLNTMDVFKDPSL      | -DWKNLE            | LKQMKK  | 4036  |      |
| Query_BAMBO | 3958 | FLP-VEPLMPRRLTRQFINLMLPMK--ESGLIYSTMVHARALRAFSDPGLLNTMDVFKDPSL      | -DWKNF             | LKQLKK  | 4029  |      |
| Query_ALLIG | 3928 | MLP-VEPLMPRRLTRQFINLMLPMK--ESGLIYSIMHARALRAFSDPGLLNTMDVFKDPSL       | -DWKNF             | LRLKK   | 3999  |      |
| Query_GAR   | 3971 | FLA-VEPLMPRRLTRQFINLMLPMK--VSGLISSMAHALRAFSDPGLLNTMDVFKDPSL-D       | WKNF               | LKQLKK  | 4042  |      |
| Query_TETRA | 4180 | GLA-VEPLMPRRLTRCFNMLPMK--INGIFRQSMISMMALKKRNILLEFCVFINDPLV-DW       | VKLT [ 21 ]        | TYNABE  | 4272  |      |
| Query_PARAM | 3784 | ALP-IEPLMPRRLTRQVFLKAPLIG--LGGLYKQSVKISALRKRKRILLDFCEVFINDPLI       | -EQKIG [ 9 ]       | QRLEE   | 3864  |      |
| Query_SLENN | 4052 | QLG-IEPLMPRRLTRQIEGVIAPH--LEGVYKQTMVHARALRAFSDPGLLNTMDVFKDPSL       | -DWKDA [ 14 ]      | VDSLIS  | 4137  |      |
| Query_STENT | 3467 | GLN-IEPLMPRRLTRQFSLMSDEG--PQGLRQSMICLALRKRKNIILDCCEVFINDPLI-D       | WKP [ 1 ]          | ----T   | 3534  |      |
| Query_NEMAT | 3936 | FLP-VEPLMPRRLTRQFINLMLPLK--ESGLVNTMIVHARALRGNHLLNTMDVFKDPSL-D       | WQMPA              | RKQAD   | 4007  |      |
| Query_PISTI | 3997 | FOF-IEPLMPRRLTRQFINMLPLK--KSGTLQSMIVHARALRGNHLLNTMDVFIQEPSL-D       | WQVYA              | RKQAT   | 4068  |      |
| Query_CORAL | 3970 | FLP-VEPLMPRRLTRQFINMLPMK--VSGQLQSTMVHARALRGNHLLNTMDVFKDPSL-D        | WQMPA              | RKQAEK  | 4041  |      |
| Query_HYDRA | 3789 | LKQ-VEPLMPRRLTRQFINLMLPLK-gv-SPYKQSMIVVQALQKSKMLISTMDIFINEPLI       | -DWQNA             | KKYE--  | 3858  |      |
| Query_LATIH | 3971 | FLP-VEPLMPRRLTRQFINLMLPMK--EQGLIYSVMHARALRAFSDPGLLNTMDVFKDPSL       | -DWKNF             | LKQLKK  | 4042  |      |
| Query_SHRIM | 3894 | FLP-VEPLMPRRLTRQFINVVFQPLG--QVGMLEKIMVSAALGALQESRHVLTAVLEAFVKEPT    | -DWL---            | ---DFVQ | 3960  |      |
| Query_MCRAB | 3885 | VLP-IEPLMPRRLTRQFINVVFQPLG--PVMIKDVMVAVLTQESRHVLSVLEAFVKEPT-D       | W---               | ---EFVR | 3951  |      |
| Query_AMPHI | 3923 | FLP-IEPLMPRRLTRQFINVVFQPT--TKGIIRESMVSCQALVSNKKVILAAVEAFVKEPTQ      | -DWL---            | ---EFVK | 3989  |      |
| Query_BARNA | 3698 | LPL-VEPLMPRRLTRQIAGLTAFLG--PAGLTRHTLRAVLRALSSRHLLAALQVFERPAA        | -QWTEHQ            | -----   | 3763  |      |
| Query_COPEP | 3703 | FLP-VEPLVPRRLTRQILAVMEPLG--THGLFRETMOVQLRCLREHPPELLISALNFTLQEP      | -DWIRSA [ 6 ]      | -KKIK   | 3779  |      |
| Query_DAPHN | 3505 | QLQ-IEPLMPRRLTRQIAGLTAFLG--LNGSVRDSMVHARALRAFSDPGLLNTMDVFKDPSL      | -DWLKEA            | EKMTEN  | 3576  |      |
| Query_STARF | 4019 | FLP-VEPLMPRRLTRQFINLMLPMK--KEGLIYSVMHARALRAFSDPGLLNTMDVFKDPSL       | -DWKTA             | SKQAKA  | 4090  |      |
| Query_STRON | 4000 | FLP-IEPLIPRVRTQIINLMLPMK--IDGLVQSTMVHARALRAFSDPGLLNTMDVFKDPSL       | -DWKFA             | VKQADY  | 4071  |      |
| Query_SEACU | 3964 | ILP-IEPLMPRRLTRQFINLMLPMK--IDGLLNTMIVHARALRAFSDPGLLNTMDVFKDPSL      | -DWKFA             | DKTASK  | 4035  |      |
| Query_FUNGI | 3832 | FLP-IEPLMPRRLTRQIIGLLSFLD--ADGFLKFNMTYLTALQNGKELNNTMDVFIKEPSL       | -DW---             | -E----  | 3894  |      |
| Query_DPURP | 3994 | FLP-IEPLMPRRLTRQFSLRFLD--SVGLLNHNTYLSALQSHKILLNTMDVFKDPSL-DW        | ----               | -S----  | 4056  |      |
| Query_HALBU | 3987 | FLP-IEPLMPRRLTRQFSLRFLD--SVGLLNHNTYLSALQSHKILLNTMDVFKDPSL-DW        | ----               | -T----  | 4049  |      |
| Query_GLOBO | 3710 | VLP-IEPLMPRRLTRQIEKFLPLG--VQNLVHVMHARALRAFSDPGLLNTMDVFKDPSL-D       | WKRFA [ 1 ]        | LQMQRQ  | 3782  |      |
| Query_PALUS | 3775 | VLP-IEPLMPRRLTRQIEKFLPLG--IPVLELPMIVNLTALNRKQVLDLNLNIFIKPEL         | -EWRFA [ 1 ]       | LSAQKQ  | 3847  |      |
| Query_CALIF | 3882 | VLA-IEPLMPRRLTRQIEKFLPLG--ISVLELPMIVNLTALNRKQVLDLNLNIFIKPEL         | -EWRFA [ 7 ]       | KIKPKE  | 3960  |      |
| Query_GLOMU | 3893 | TLN-IEPLIPRRLTRQIETMEPLG--SKGLLEPMIKIQLIMQANKDILLNSMDIFIKPEL        | -DW----            | [ 7 ]   | AKQKD | 3967 |
| Query_LOBOS | 3869 | VLP-IEPLMPRRLTRQIAGLTAFLG--TKGLLEHPMVICMALKAKKDVILNTMDVFKDPSL       | -DWKRA [ 7 ]       | KRQAD   | 3947  |      |
| Query_RACEM | 3851 | QLP-VEPLVPRRLTRQIAGLTAFLG--VTGILETPTHIMKAFRSEKSLNTMDVFIKEPSL        | -DWKRA [ 7 ]       | KRQNSQ  | 3929  |      |
| Query_PVIOL | 3987 | FLP-IEPLMPRRLTRQFSLRFLD--SVGLLNHNTYLSALQSHKILLNTMDVFKDPSL-DW        | ----               | -S----  | 4049  |      |
| Query_BOMBU | 3677 | DRQ-IEPLMPRRLTRQIIGLLSFLD--EKDLLKTIIMHTLQAVRNDQGPILSCMDVVFHEP       | -L-NWTEHL [ 3 ]    | LRSE-   | 3749  |      |
| Query_ABDES | 3830 | RQDgIEPLMPRRLTRQFINVVFQPLG--TSGMMSKCMVYLRCLDRKRLRSCLQVFERP          | -DW----            | [ 2 ]   | ----- | 3894 |
| Query_ANT   | 3755 | RAP-IEPLVPRRLTRQIIELELQPT--ERDFLATIMHARALRNDQGPILACMDIFVHKP         | -I-QRSFSI [ 3 ]    | ETMKD   | 3827  |      |
| Query_WHITE | 3819 | ILP-IEPLMPRRLTRQIIELELQPT--ERDFLATIMHARALRNDQGPILACMDIFVHKP         | -I-QRSFSI [ 2 ]    | LAQKQS  | 3892  |      |
| Query_BEETL | 3644 | NLP-VEPLVPRRLTRQIIELELQPT--ATGLFREIMVHARALRNDQGPILACMDIFVHKP        | -I-QRSFSI [ 2 ]    | LEHA    | 3711  |      |
| Query_THRIP | 3739 | NLP-VEPLVPRRLTRQIIELELQPT--TKGLIETMIVHARALRNDQGPILACMDIFVHKP        | -I-QRSFSI [ 1 ]    | LAKKH   | 3807  |      |
| Query_TERMI | 3823 | FLP-VEPLMPRRLTRQIIELELQPT--ETGLFRETMIHCLRTRLNNDMLATMEVFQEPSI        | -DWLEFA [ 5 ]      | LNKKS-  | 3898  |      |
| Query_FILEA | 3730 | TLP-IEPLIPRRLTRQIIELELQPT--AFGLIPRVMHARALRAFSDPGLLNTMDVFKDPSL       | -DWLEPI [ 3 ]      | -----   | 3798  |      |
| Query_MIDGE | 3849 | TLS-IEPLVPRRLTRQIIELELQPT--VNGMIRKMNHVMRCFRHSQTLICLEMVFREPTL        | -DW----            | [ 2 ]   | ----- | 3912 |
| Query_LAODE | 3795 | VLA-IEPLIPRRLTRQIIELELQPT--VTGLIKESMFRCLGLRKRKLIMASIEVFIHEPLM       | -DWAKQA            | -----   | 3860  |      |
| Query_LOTTI | 3909 | FLP-VEPLMPRRLTRQIINLTLPLG--IRGLLENTMIHTLRALQDYDLLNTMDVFKDPSV        | -DWLFA             | EKQRNE  | 3980  |      |
| Query_APLYS | 4015 | FLP-VEPLMPRRLTRQIINLTLPLG--VRGQMESSMCHVLRALRSDLLSSTMDVFKDPSL        | -DWLDA             | ERQMNE  | 4086  |      |
| Query_SCALL | 3998 | FLP-IEPLMPRRLTRQIINLTLPLG--VRGLMESTMIVHARALRNDQGPILACMDIFVHKP       | -I-QRSFSI [ 2 ]    | EKQIS   | 4069  |      |
| Query_CRASS | 3941 | FLP-IEPLMPRRLTRQIINLTLPLG--VHGLMESTMIVHARALRNDQGPILACMDIFVHKP       | -I-QRSFSI [ 2 ]    | EKQMNE  | 4012  |      |
| Query_OCTOP | 3850 | YLL-IEPLIPRRLTRQIINLTLPLG--TRGTFERTMIVHARALRNDQGPILACMDIFVHKP       | -I-QRSFSI [ 2 ]    | RNMHR   | 3921  |      |
| Query_POMAC | 3948 | FIP-VEPLMPRRLTRQIINLTLPLG--VRGLLENTMIHVLHARALRNDQGPILACMDIFVHKP     | -I-QRSFSI [ 2 ]    | ERQMRG  | 4019  |      |
| Query_WHIPW | 3799 | LPL-IEPLMPRRLTRQIINLTLPLG--VNGLLRSSMVFNLSRLRNDQGPILACMDIFVHKP       | -I-QRSFSI [ 2 ]    | LK----  | 3866  |      |
| Query_TRICH | 3805 | YLP-IEPLMPRRLTRQIINLTLPLG--MHGLLESTMKYCLKAPRDSYILLNTMDVFKDPSL       | -DWLFA             | RRQIGE  | 3876  |      |
| Query_AASTA | 3601 | LPL-VEPLVPRRYTKQIRGVLPD--ASLLLQDQAAVLDALRQDQQRILDSVMRVLNEPLL        | -EWQTQS            | -----   | 3666  |      |
| Query_AEUTE | 3524 | MLP-VEPLVPRRYTKQIRGVLPD--AKLLFQDQAAVLDALRQDQQRILDSVMRVLNEPLL        | -EWQVTV            | -----   | 3589  |      |
| Query_PLASM | 3797 | VLP-VEPLIPRRTYTRQMFVQPYD--GPSLLAREMOTVFDALRSKRQVIESVMNVLHDP         | -DWQSI [ 22 ]      | NAVMDK  | 3890  |      |
| Query_BREMI | 3780 | VLP-VEPLIPRRTYTRQMFVQPYD--GANLVCQDMQAVFDALRSKRQVIESVMNVLHDP         | -DWQST [ 22 ]      | DAEMED  | 3873  |      |
| Query_OIGA  | 3833 | VLP-VEPLIPRRTYTRQMFVQPYD--GPNLLIQDMQAVFDALRSKRQVIESVMNVLHDP         | -DWQST [ 22 ]      | EDVAME  | 3922  |      |
| Query_LIGNO | 4226 | FLP-VEPLVPRRLTRQICGAMGFLG--pSGAFVRCILGHCLALRERELVLSVQVFIN           | DVSA-DWQKLA [ 14 ] | DTSEHR  | 4312  |      |
| Query_CESTO | 4015 | SLP-LPEYVPRRLTRQICGAMGFLG--PAGLFGYILSRTLASRLYNSGLFSSIQTFMKDKS       | T-DWSVFS           | ----ER  | 4083  |      |
| Query_OVI2  | 4505 | ILP-VEPLVPRRLTRQICGAMGFLG--PAGLFGYILSRTLASRLYNSGLFSSIQTFMKDKS       | T-DWSVFS [ 2 ]     | TQOPT   | 4577  |      |
| Query_PRIAP | 3984 | NLP-IEPLMPRRLTRQIQLLPHGgRGLLYQTMVHARALRNDQGPILACMDIFVHKP            | -I-QRSFSI [ 2 ]    | AER     | 4053  |      |
| Query_ROTIF | 3883 | CLP-IEPLVPRRLTRQILKLIAPLE--QRGLFESSMCHVCLALRENNDLLVCILDVFIKEPSI     | -DWIGSA            | VKIAKK  | 3954  |      |
| Query_SPONG | 3986 | FLP-IEPLMPRRLTRQIINLTLPLK--VSGQLRSCMIHTLRALRNDQGPILACMDIFVHKP       | -I-QRSFSI [ 2 ]    | EWSNA   | 4055  |      |
| Query_TARDI | 3942 | SLP-IEPLVPRRLTRQIINLTLPLK--VSGQLRSCMIHTLRALRNDQGPILACMDIFVHKP       | -I-QRSFSI [ 2 ]    | DLQAA   | 4013  |      |
| Query_TRICH | 3958 | FLP-IEPLMPRRLTRQIINLTLPLK--ENGQLKCSMVHARALRNDQGPILACMDIFVHKP        | -I-QRSFSI [ 2 ]    | NRQNAK  | 4029  |      |
| Query_OSTRE | 3776 | ALP-IEPLVPRFRATPALDVLAPMS--ARTWLETDMARTVKALQNGSTLLKGMDFLREPLI       | -DWEREA [ 3 ]      | SRSSKS  | 3850  |      |
| Query_NITEN | 4129 | MLP-VEPLVPRRLTRQIINLTLPLD--TDLKLLKIDTRVMTVLQENKDVAVMDVFKDPSL        | -DWRNES [ 8 ]      | AK----  | 4204  |      |
| Query_CLUBM | 3740 | LPL-VEPLVPRRLTRQIINLTLPLD--SLGLLKNMVRVLSALHKSQMIQAVMDVFKDPSL        | -DW----            | -K----  | 3802  |      |
| Query_MOSS  | 3907 | LPL-VEPLVPRRLTRQIINLTLPLD--AVGLLRSDMVRIMTALRSRGLISAVMEVFKEPLV       | -DW----            | -RQAV   | 3973  |      |
| Query_LIVER | 3972 | LPL-VEPLVPRRLTRQIINLTLPLD--AVGLLRSDMVRIMTALRSRGLISAVMEVFKEPLV       | -DW----            | -K----  | 4034  |      |

Supplementary Figure 7: DNA-PKcs: All phyla - expanded list: COBAL

|             |      |      |                  |               |                   |                                |      |
|-------------|------|------|------------------|---------------|-------------------|--------------------------------|------|
| Query_CAPIT | 4004 | M    | SNRKEDTS[2]T     | LDSQWFKPE     | KVNIVRQKLEGSNPSH  | VMRAELALG--Q-LGS---YLKYFVI--V  | 4061 |
| Query_LINGU | 4013 | T    | MSSQEDN-[1]-     | -DAKWYFKQ     | KVAFARRKLGANPWC   | ITRDELRLG--H-KRR-gKTYQAFIA--I  | 4068 |
| Query_LIMUL | 4052 | -    | GKA-----[6]      | -DTQWYFKQ     | RVQFAQQKLOGINPCY  | ITMLRV-LFR-S-DK-----MKL--V     | 4100 |
| Query_SPIDE | 3988 | M    | GM-----[5]       | DD--WFRPQ     | RILIAARRKLEEFNFCY | ITRDELRLG-S-MRP---CFQNMVS--V   | 4040 |
| Query_SCORP | 4010 | I    | GKVDENV[8]N[10]  | CDFNWYFKQ     | RILFAARRKLEGINPCY | ITRDELRLG-S-MKP---IFQRLLTD--V  | 4084 |
| Query_TICK  | 3824 | S    | SPQASKRQ[2]A[2]  | VSLDWFPRQ     | KVSIVRQKLEGGHPSY  | ILRDELKLR---KTN-qPDFASLEL--V   | 3884 |
| Query_MONOS | 4054 | E[2] | ---EELQ[3]-      | ---YATR       | NLERLRLKLEGGCHPAA | IMAEVADSR-H-----IAAYSRSKVQe-V  | 4105 |
| Query_ROSET | 4003 | G    | -----[3]         | -DVALFAEQ     | KIAVARRKLAGDNPAA  | ILISELESNR-HvTSD-rSHWRKAKD--I  | 4052 |
| Query_BELCH | 4098 | Q    | MDKVMGGE[3]L     | DDISWYPRE     | KIKFAAKKLOGVNPETH | ITKAEQLG--H-KNL--PWFKSFCL--V   | 4157 |
| Query_CTONA | 4040 | D    | QRYSDSV-[2]      | SDRVWYARR     | KMALTKKLEGENPSS   | ITCDELNHNSt-TKF-k--KSYCC--I    | 4097 |
| Query_CAECI | 4039 | Q    | GTWTKVYN T       | AEKNNYAVQ     | KVNCARRKLAGTNPAT  | ITCDELRLG--H-EKS--VAYKEMKA--V  | 4095 |
| Query_HUMAN | 4024 | G    | GSWIQEIN V       | AENNNYPRQ     | KICYARRKLAGAPAV   | ITCDELRLG--H-EKA--PAFRDYVA--V  | 4080 |
| Query_MOUSE | 4024 | G    | GSWIQEIN V       | TEKNWYPOH     | KIRYARRKLAGANPAV  | ITCDELRLG--H-EAS--SAFRSYTA--V  | 4080 |
| Query_XENOP | 4042 | K    | GEWKAQV D        | TSHNWHFQQ     | KIHCAARRKLDGANPCE | ITCDELRLG--H-ESA--PEYKDFIA--V  | 4098 |
| Query_PLATY | 4031 | G    | GTWTRAVN T       | ADTNWYPLQ     | KISYARRKLTGTNPAT  | ITCDELRLG--H-EKV--PAFGDYIS--V  | 4087 |
| Query_TASDE | 4036 | G    | GSWTREVN M       | TEMNNYPLQ     | KINYARRKLAGANPAA  | ITCDELRLG--H-EKV--PAFECYVS--V  | 4092 |
| Query_CANAR | 4032 | G    | GTWIKELN T       | SEVNNYPLQ     | KVNYVRRKLTGANPAI  | ITCDELRLG--H-ERS--PAYNDFAA--V  | 4088 |
| Query_OSTRI | 4002 | G    | GTWIKELN T       | SEVNNYPLQ     | KVSYVRRKLTGCPNCR  | ITCDELRLG--H-EKS--PFFSDFVA--V  | 4058 |
| Query_TURTL | 4040 | G    | GSWKEVNT T       | AEINNYPLO     | KVNCARRKLAGANPAV  | ITCDELRLG--H-EKS--PAYKEYVA--V  | 4096 |
| Query_GECCO | 4042 | G    | GTWTKDIN M       | DEVNNYPLQ     | KVNFARRKLAGANPAV  | ITSDLELRG--H-EKS--SAYRYVVS--V  | 4098 |
| Query_DANIO | 4015 | G    | GTWTESVN T       | KEINNWPLO     | KVNFARRKLEGTNPVS  | ITSEELCLG--F-EKM--PEYKGLLA--V  | 4071 |
| Query_SNAKE | 4026 | G    | GTWKEIN T        | DEVNNYPLQ     | KVFIARRKLAGANPAV  | ITCDELRLG--H-EKS--EAFREYVS--V  | 4082 |
| Query_STERL | 4046 | A    | GSWSAVN T        | NEINNYPMO     | KVNFARRKLAGANPAV  | ITSEELKLG--F-EKS--PAYQSI IA--V | 4102 |
| Query_MILII | 4037 | G    | GTWSDVNT T       | REIHWYPMQ     | KVRYARRKLAGANPAA  | ITRDELRLG--H-ETT--EAYKSYVA--V  | 4093 |
| Query_BAMBO | 4030 | E    | GSWSKDVN I       | NEINNYPLO     | KVNYARRKLAGANPSA  | ITRDELRLG--H-EKS--KAYASYVA--V  | 4086 |
| Query_ALLIG | 4000 | G    | GTWKEVNT T       | CEVNNYPLO     | KVNCVRRKLAGSNPAA  | ITCDELRLG--H-EKS--LAYRDYVA--V  | 4056 |
| Query_GAR   | 4043 | G    | GTWKTETN T       | KEIDWYPRQ     | KVQFAARRKLAGANPAA | ITSDLELRG--F-EKE--SWCRALAA--M  | 4099 |
| Query_TETRA | 4273 | S[6] | GLSTMEAS[4]L[3]  | -----MQ       | RIDIVKLLIGMNPAA   | LPTEELSSR-H--KT-gNYQHLKS--A    | 4336 |
| Query_PARAM | 3865 | Q    | ---SKIEE[8]S[10] | IKETWYPRK     | KIDIVHKLLIGVHCSL  | ILLEEFDES-HqSAR---YADNLRK--A   | 3937 |
| Query_SLENN | 4138 | -    | -EYEEELQ[2]-     | ---AWYPRK     | KIEVMKDKLNGLNPVR  | IMAKELQDSK-H-EKK--PYFVILN--A   | 4191 |
| Query_STENT | 3535 | -    | -SYNVS-E[2]-     | ---ADIPSF     | KLEVVKKLLTGINSAL  | IMLELEKTI-H-MNS--NIQDRIAE--A   | 3587 |
| Query_NEMAT | 4008 | Q    | HMEIGMY          | EDLTWYPRE     | KVLTAQRKLEGANPAF  | VTRQELRLG--H-RRR--SWFRNLQS--A  | 4063 |
| Query_PISTI | 4049 | Q    | G--INEEB         | -QKADWYFKQ    | KVQSANRKLGEFNPAI  | VMRDQLQ--H-SKQ--SWYQMES--V     | 4122 |
| Query_CORAL | 4062 | Q    | KLNLDN-          | -TDLAWYKPE    | KINSARRKLEGANPEA  | IMKQDLESG--H-KKA--GYEEMLS--V   | 4096 |
| Query_HYDRA | 3859 | -    | ---SLALL         | -[2]SSPDWYFKQ | KINICKQKLGVPAL    | ITSEELRNSFLH-TRD-qLLESYSIS--V  | 3915 |
| Query_LATIM | 4043 | G    | GSWTKEVN T       | KEVNNYVQV     | KVKCGRKLEGVNPIV   | ITCNELRLG--H-EKL--SAYQSYLA--V  | 4099 |
| Query_SHRIM | 3961 | K    | QEGDQDS          | -KVELFSSK     | RIELLNDKLSINPAA   | [4]AVSQNKVVA---KO--KAYENLKQ--A | 4017 |
| Query_MCRAB | 3952 | E    | LEGNLDES         | -KLEMFSEE     | RMNCKEKLTFNPAI    | [4]ALSKNKA VR---RD-PTAFELK--V  | 4009 |
| Query_AMPHI | 3990 | L    | QEDVVDQE         | -GIQSYSM      | RMKIITKLLDCVNPACI | [4]AMNKNRIP---QN-vKVS--LSK--I  | 4045 |
| Query_BARNA | 3764 | -    | ---BEEH[3]-      | ---FPKQ       | RVGMTRRKLEGVHPSI  | ITCDELRLG---DKS---DLNKLVS--A   | 3828 |
| Query_COPEP | 3780 | K    | ---BEEH[3]-      | ---FPKQ       | RVGMTRRKLEGVHPSI  | ITCDELRLG---DKS---DLNKLVS--A   | 3828 |
| Query_DAPHN | 3577 | R[2] | ATPTKEST[1]-     | ---WSPTQ[1]-  | VGRTDNLLNGFNPV    | ITCDELRLG---DKS---DLNKLVS--A   | 3828 |
| Query_STARF | 4091 | Q    | KDAGRULE[8]S     | LDESWYPRE     | KVNFAQKLEGANPSD   | ITQRELAIG--H-SRN--PAFSAIKE--V  | 4155 |
| Query_STRON | 4072 | Q    | KLSDESRG         | -DISWYFKQ     | KIKFAAKKLOGVNSTY  | ITKAELEMGP-H-SKD--ARDAPFLK--A  | 4127 |
| Query_SEACU | 4036 | G    | QGLEI--S         | SALWYKPE      | RLLIAKAKLEGANPAY  | ITRDELRLG--H-GKS--TSLQKFA--V   | 4091 |
| Query_FUNGI | 3895 | -    | ---RLAK[5]Q[5]   | SQA-WFPKK     | KIEIAKLLQENPAH    | ITALELKEVS-H-AN--aPYLPHLQ--I   | 3956 |
| Query_DPURP | 4057 | -    | ---KLAN[5]Q[6]   | TKNNWYFKQ     | KIHIAKLLDLYNPAI   | ITLEELSASV-H-SN--SPYEKNLQE--I  | 4120 |
| Query_HALBU | 4050 | -    | ---KLAS[5]Q[6]   | VES-WFPKK     | KVDIARRKLEGNPAA   | ITSEELANSV-H-KG--qIYEKSIQN--V  | 4112 |
| Query_GLOBO | 3783 | G    | -KGTWIS[5]-[1]   | AAPEWYPRQ     | KLEIARRKLEGNPFP   | ITADELKNHG-E-K--KQWYKMRV--T    | 3843 |
| Query_PALUS | 3848 | G    | -KTSQDTS[5]T[1]  | NPPEWYFQO     | KLDIARRKLEGNPFP   | ITQLELWGH-G-E--KPFQAVRD--V     | 3909 |
| Query_CALIF | 3961 | -    | ---E[5]T[1]      | IEPPWYFKQ     | KLNIARRKLEGNPSPN  | ILITELNESH-S-N--tPFLRYLKE--A   | 4015 |
| Query_GLOMU | 3968 | -    | ---RNSN[5]D[1]   | QTVEWYPRQ     | KLDIARRKLEGNPSPN  | IVCSLELASH-S-N--KPFWNSITK--I   | 4025 |
| Query_LOBOS | 3948 | -    | ---MDSF[5]S[1]   | APPAYLQQ      | KMDIARRKLEGNPVPY  | LTVQELNMGH-A-N--kPFLAATK--I    | 4005 |
| Query_RACEM | 3930 | G    | -SPASDIS[5]P[1]  | AIETAWYPYQ    | KIDIAARRKLAGENPSY | IVATEVRNND-S-PHV-KAADRIEE--V   | 3993 |
| Query_PVIOL | 4050 | -    | ---KLAN[5]Q[6]   | TKNEWYFKQ     | KVALAKKLEMYNPAI   | ITLEELAGSV-H-NG--LAYDSALQL--I  | 4113 |
| Query_BOMBU | 3750 | -    | ---ED[3]V        | K---WVPIR     | KIEAVTKKLNKIPSL   | ITLDLQKQHHd-----KYFDRYA--I     | 3798 |
| Query_ABDES | 3895 | -[3] | RRFVQENK[3]L     | R---WDPQA     | RINNAVRRKLNANPVC  | LIAEELRLGQVq-CNR-eILEGYL---K   | 3954 |
| Query_ANT   | 3828 | -    | ---DN[3]K[3]     | I---WSSKR     | NIEIVAKKLNHIPS I  | ITLEHLKKAHnd-----EYFARYCA--I   | 3876 |
| Query_WHITE | 3893 | G[6] | SRSNYFKD[3]S     | -----FSLR     | NIELAWKLEGGHPTC   | IMIKLEAG---HKT-SPYLDAPFK--I    | 3953 |
| Query_BEETL | 3712 | -    | ---FST[3]T       | SNCWYPAQ      | KIEQARRKLAGANPVH  | IMIEDLLAGHq---KN-qAYMKAYIA--L  | 3766 |
| Query_THRIP | 3808 | -    | ---WSE[3]N       | ANPAWLPV      | KIHQARRKLGTPNVH   | LMREDELSEIHTVFKD-g-----YLK--T  | 3860 |
| Query_TERMI | 3899 | -    | ---HEE[2]-       | ---TWYFQO     | KLDLAKKLEGNPVT    | ITTELEKAG---FKD-SKYLAKFLE--C   | 3947 |
| Query_FLEA  | 3899 | -[3] | SEDNEALN[3]S     | SISSVENEQ[5]  | KLRMARLKLQSNPVH   | ILQDELKHSFVS-TIN-eIYVNHYTE--K  | 3868 |
| Query_MIDGE | 3913 | -[3] | MKNTEANA[3]K     | GISDWNPEQ     | RIATVRRKLEGNPVC   | IVQDEMSVSEIA-NNR-gLYDAYC---N   | 3975 |
| Query_LAODE | 3861 | -    | -KYSALN[2]-[4]   | TDYNSRPRE     | KIERARRKLDGANPVC  | VMTEELESgh-----KN-kPYLEYLKS--M | 3920 |
| Query_LOTTI | 3981 | M    | LMTADDE-         | -ESTWYFKQ     | KIQYARRKLEGNPCH   | ITKDELRLG--H-SRS--PAIKHFPEK--C | 4034 |
| Query_APLYS | 4087 | G    | KESEDA--[1]-     | -DDNWYFKQ     | KIQFARRKLDGHPCY   | IMKELALG--H-SKR--PAFKSLVN--V   | 4141 |
| Query_SCALL | 4070 | L    | NLGDSELV[1]-     | -NITWYKPE     | KVHYVRRKLEGNPSPY  | ITRDELRLG--H-SKN--DFLRNPFES--V | 4125 |
| Query_CRASS | 4013 | M    | KVEVSPE-[1]-     | -EVQWYKPE     | KIEYVRRKLDGHPVC   | ISREELKLG--H-SKK--PAPFALER--V  | 4067 |
| Query_OCTOP | 3922 | K    | AQDFSE-          | [1]EDLSWYKPE  | KIDFVRRKLDGHPAY   | ITRDELNLNS-H-VRK-SDALESITS--I  | 3978 |
| Query_POMAC | 4020 | G    | MGPKPAD-[1]-     | -DMRWYKPE     | KIETAARRKLDGHPAY  | ITRDELRLG--H-LRN--QALKDPEK--V  | 4074 |
| Query_WHIPW | 3867 | -    | QTKLSDSS S[2]    | GRLSWYFKQ     | KITVARRKLDGHPVS   | IMEABL-SARGH-TDN--FPLQILC--C   | 3925 |
| Query_TRICH | 3877 | G    | RTLWNDEA N[2]    | DSFKWYPEE     | KISAAARRKLDGHPVI  | IMQDELMSNRrH-LSS--FPLHQIIN--C  | 3937 |
| Query_AASTA | 3667 | -    | ---RT[8]T[7]     | AAATWMPVQ     | KMDLARRKLRGEHVH   | ITCDELRLG-NvAAV-LKPLQATLP--P   | 3734 |
| Query_AEUTE | 3590 | -    | ---KK[6]-[6]     | ASSWLPPEL     | KMQLAQRKLRGEHVH   | ILREELQLNp-HiASV-ySHFDQIIP--V  | 3653 |
| Query_PLASM | 3891 | V[6] | RESQSRK[8]N[1]   | -TTAWLPNV     | KIAIARRKLEGVSPAL  | LLKQELSQNP-HiKQH-LNKYSLVN--A   | 3964 |
| Query_BREMI | 3874 | V[6] | R---SNKN[8]I[1]  | -NAAWLPDI     | KIAIARRKLDGISPAL  | LLKLELSQNS-HLTHH-LSKFYALVD--A  | 3944 |
| Query_OLIGA | 3923 | V[6] | SKRSRST[8]S[7]   | TTLAWLPDV     | KVAIARRKLEGFSPRA  | LLKEELQNP-HLGKQ-LKLFQALVD--T   | 4003 |
| Query_LIGNO | 4313 | A    | GSKSASAS[8]S[5]  | CPERWFSTE     | KLQVRRKLEGSAPCO   | TLKSELDDR-H-RGK--PYTSGMLA--V   | 4383 |
| Query_CESTO | 4084 | Y    | -----[1]         | QSQEEYQRS     | RLSLIRKLLGHCPAE   | VLLDILGRFRgs--QE---WFRNPFEM--I | 4132 |
| Query_OVI2  | 4578 | E    | -----            | ---FTRG       | RLELAKKLSGHPPAT   | LLCEVAIRYgs--HawfEPRRLInqIv    | 4625 |
| Query_PRIAP | 4054 | L    | ADKDHEN[5]E      | QVQEWYFKQ     | TIGVARSKLIGANPAI  | ITKAEALG--H-RKH--EALQMTN--V    | 4115 |
| Query_ROTIF | 3955 | N    | LNEDMET[4]-      | ---YAKD       | RVNSVQKLFGMHPVS   | IMRNDLCSGI-H-KDS--KYLYFVD--V   | 4010 |
| Query_SPONG | 4056 | -    | ---LAQKN T       | DDNTWYKPE     | KVNICRKLKLGFPNSH  | LMLDLELHG--F-KNK--PEFYKLG--I   | 4109 |
| Query_TARDI | 4014 | -    | ---DAD S[1]      | EELLWYPRE     | KIDTAARRKLRGNPAF  | ITRTEVRSNTfL-KSD-qRLLAKVED--A  | 4068 |
| Query_TRICH | 4030 | Q    | G--LKTES         | -DDFSWYPRE    | KVTFARRKLEGNPAF   | VTRDELRLG--H-H-----LSILES--F   | 4079 |
| Query_OSTRE | 3851 | S    | -----            | ---HIQS       | RITHAWKLELDNPAK   | LVLQELCASR--HqDRS---YWTNMCE--A | 3893 |
| Query_NITEN | 4205 | -[1] | RKGAVAL[5]D[4]   | VLEQEHVSL     | KIENAARKLARWNPAA  | VTLAELQSSM-V-NG--kPFRSLEG--I   | 4271 |
| Query_CLUBM | 3803 | -    | KEAARTAS[5]-[2]  | SHEQHVLE      | KIENAQRKLDLWNPAA  | VTLGELQSSV-H-AG--tPWHAlEA--A   | 3865 |
| Query_MOSS  | 3974 | K[6] | RDVSKSTA[5]G[6]  | 7FSEEHVEL     | KVETAQRKLDLWNPAA  | ITISELGFVS-H-AN--kPYTRALEE--I  | 4049 |
| Query_LIVER | 4035 | -    | NEAMKTS[5]K[7]   | TFEQHVLE      | KVENAQRKLELWNPAA  | ITIAELRSSV-H-AR--kPYSKALES--I  | 4103 |

Supplementary Figure 7: DNA-PKcs: All phyla - expanded list: COBALT

|              |      |           |              |           |                                   |      |
|--------------|------|-----------|--------------|-----------|-----------------------------------|------|
| Query_CAPIT  | 4062 | LMGDK     | QADIRARL     | PAD---    | GLSSEEQVAALLNLATDPNLLGRTPAGWEPWV  | 4109 |
| Query_LINGU  | 4069 | TQGQ-     | -DNTRTKF     | AEV---    | DLTPEQQVACLIDQATDPNLLGRVYEGWEPWV  | 4114 |
| Query_LIMUL  | 4101 | CLGDK     | EDNIRAKL     | PNA---    | GLTVEQQVACLIDQATDPNLLGRVYEGWEPWV  | 4148 |
| Query_SPIDE  | 4041 | CIGDA     | SHNLRACL     | KKS---    | GLSVEEKIESLIDQATDPNLLGRVYEGWEPWV  | 4088 |
| Query_SCORP  | 4085 | CLGDR     | K-SLRQNL     | PKN---    | GLSVKQQVSLIDQATDPNLLGRVYEGWEPWV   | 4131 |
| Query_TICK   | 3885 | CLGAP[2]  | ESRMRRRF     | ARGdk-    | LSPRDQVDCLEQATDPNLLGRVYEGWEPWV    | 3935 |
| Query_MONOS  | 4106 | VWGSR[1]  | DDLRATL[2]   | --Eva-    | LTVQQVADLIDQATDPNLLGRVYEGWEPWV    | 4155 |
| Query_ROSET  | 4053 | IAGDA     | QSNIRATM[3]  | ----      | GLSVEQVRCLEQATDPNLLGRVYEGWEPWV    | 4100 |
| Query_BELCH  | 4158 | AMGDG     | GKDVRAQK     | PAE---    | GLSVEQVACLIDQATDPNLLGRVYEGWEPWV   | 4205 |
| Query_CTONA  | 4098 | ASGDT     | K-NIRFLM     | -PK-s     | GLSVEQVDCLEQATDPNLLGRVYEGWEPWV    | 4144 |
| Query_CAECL  | 4096 | AMGDK     | THNVRARE     | PKD---    | GLTEEIQVCLIDQATDPNLLGRVYEGWEPWV   | 4143 |
| Query_HUMAN  | 4081 | ARGSK     | DHNIRAQE     | PES---    | GLSEETQVCLIDQATDPNLLGRVYEGWEPWV   | 4128 |
| Query_MOUSE  | 4081 | ARGNR     | DYNIRAQE     | PES---    | GLSEETQVCLIDQATDPNLLGRVYEGWEPWV   | 4128 |
| Query_XENOP  | 4099 | ARGDK     | KHNRRTNE     | PPD---    | GLTEETQVCLIDQATDPNLLGRVYEGWEPWV   | 4146 |
| Query_PLATY  | 4088 | ARGSK     | DHNVRARQ     | PEE---    | GLSEEQVQCLIDQATDPNLLGRVYEGWEPWV   | 4135 |
| Query_TASDE  | 4093 | AQGNR     | DHNFRARQ     | DD---     | GLSEETQVCLIDQATDPNLLGRVYEGWEPWV   | 4140 |
| Query_CANAR  | 4089 | ARGNS     | NHDIRAKE     | PED---    | GLSEETQVRCLEQATDPNLLGRVYEGWEPWV   | 4136 |
| Query_OSTRI  | 4059 | ARGNA     | AHNTRAKE     | PED---    | GLSEETQVRCLEQATDPNLLGRVYEGWEPWV   | 4106 |
| Query_TURTL  | 4097 | AQGRS     | DHNIRAKE     | PED---    | GLSEEQVRCLEQATDPNLLGRVYEGWEPWV    | 4144 |
| Query_GECKO  | 4099 | ARGSK     | EHNIRAKE     | AED---    | GLSEEQVRCLEQATDPNLLGRVYEGWEPWV    | 4146 |
| Query_DANIO  | 4072 | ARGEE     | QHNIRARL     | ADK---    | DLTVEQVDCLEQATDPNLLGRVYEGWEPWV    | 4119 |
| Query_SNAKE  | 4083 | AQGSK     | QFNIRARQ     | PQD---    | GLAEEIQVCLIDQATDPNLLGRVYEGWEPWV   | 4130 |
| Query_STERL  | 4103 | AQCEK     | EHNVRARE     | APQ---    | GLSVEQVVECLIDQATDPNLLGRVYEGWEPWV  | 4150 |
| Query_MLIII  | 4094 | AMGDK     | EHNIRARV     | PED---    | GLSVEIQVDCLEQATDPNLLGRVYEGWEPWV   | 4141 |
| Query_BAMBO  | 4087 | AMGDK     | DHNVRARE     | SEE---    | GLSVEQVDCLEQATDPNLLGRVYEGWEPWV    | 4134 |
| Query_ALLIG  | 4057 | ARGTR     | DQNIIRAKE    | PED---    | GLTEETQVCLIDQATDPNLLGRVYEGWEPWV   | 4104 |
| Query_GAR__  | 4100 | AQGEQ     | GVNVRASQ     | AAE---    | GLAVEIQVVECLIDQATDPNLLGRVYEGWEPWV | 4147 |
| Query_TETRA  | 4337 | LTKKP     | -KSIRNQY[1]  | -EKqf-    | LEVHEQVDCLEQATDPNLLGRVYEGWEPWV    | 4384 |
| Query_PARAM  | 3938 | IQGIN     | QNRLRHQY[3]  | ----      | qLTSVIQVDCLEQATDPNLLGRVYEGWEPWV   | 3986 |
| Query_SLEMN  | 4192 | IKG-Q     | ESSIRYKL[3]  | -NRry-    | LEVDEFIDCLEQSRDPNLLGRVYEGWEPWV    | 4241 |
| Query_SPTNT  | 3588 | VLG-D     | KDSLRRNN-    | -NSnv-    | LSDVLDVLEHATDPNLLGRVYEGWEPWV      | 3633 |
| Query_NEMAT  | 4064 | CLGDR     | RHNVRARQ     | EEN---    | ELTSEAQVDCLEQATDPNLLGRVYEGWEPWV   | 4111 |
| Query_PISTI  | 4123 | CLGDR     | NANVRARE     | PES---    | GLSVEQVQCLIDQATDPNLLGRVYEGWEPWV   | 4170 |
| Query_CORAL  | 4097 | LLGDK     | QHNQRARH     | YVN----   | TVENQVACLIDQATDPNLLGRVYEGWEPWV    | 4142 |
| Query_HYDRA  | 3916 | VEGSS     | QHNIRKLL[6]  | PEK-e-    | FLTVEEQVDCLEQATDPNLLGRVYEGWEPWV   | 3970 |
| Query_LATIN  | 4100 | VKGDP     | DHNVRARE     | VKE---    | DLPVEQVACLIDQATDPNLLGRVYEGWEPWV   | 4147 |
| Query_SHRIM  | 4018 | VLG-D[1]  | GESVRSASV    | GER---    | GLSTHQVDCLEQATDPNLLGRVYEGWEPWV    | 4065 |
| Query_MCRAB  | 4010 | VLG-Q[1]  | CESARANM     | DRT---    | GLTIHQVDCLEQATDPNLLGRVYEGWEPWV    | 4057 |
| Query_AMPHI  | 4046 | IMQDD[1]  | GRALMA--     | -KE---    | GLSVPQVDCLEQATDPNLLGRVYEGWEPWV    | 4091 |
| Query_BARNA  | 3812 | ARGRR     | CHEPRAEL[3]  | ----      | GLTAEQVDCLEQATDPNLLGRVYEGWEPWV    | 3859 |
| Query_COPEP  | 3829 | VEGER[1]  | STSGKRKD[3]  | -Ddet-    | GLSPSDQVDCLEQATDPNLLGRVYEGWEPWV   | 3881 |
| Query_DAPHN  | 3637 | VRGNR[6]  | ETIKRKYV[3]  | SSRra-    | SMPQIECLEQSTDPACLGRVYEGWEPWV      | 3692 |
| Query_STARF  | 4156 | VKGDR     | SQNIIRASS    | PK-s      | GLSVETQVVECLIDQATDPNLLGRVYEGWEPWV | 4203 |
| Query_STRON  | 4128 | LKSTC     | QGNTEKR      | AQSkSk    | GLSVEQVACLIDQATDPNLLGRVYEGWEPWV   | 4178 |
| Query_SEACU  | 4092 | VRGDC     | RVNIRARQV    | AREps-    | GLSVEQVACLIEQATDPNLLGRVYEGWEPWV   | 4141 |
| Query_FUNGI  | 3957 | VMGSK     | THNIRARV     | -GtKc-    | SSAKEQVDCLEQATDPNLLGRVYEGWEPWV    | 4004 |
| Query_DPURP  | 4121 | IKGDP     | KYNIRSKV     | -NKIc-    | SSVKEQVDCLEQATDPNLLGRVYEGWEPWV    | 4168 |
| Query_HALBU  | 4113 | VKGDP     | KHNIRAKA     | -CqIc-    | STAKEQVDCLEQATDPNLLGRVYEGWEPWV    | 4160 |
| Query_GLOBO  | 3844 | LMGDP     | VNIRAK-      | AGNIc-    | QTPKEQVVECLIDQATDPNLLGRVYEGWEPWV  | 3891 |
| Query_PALUS  | 3910 | VMGEP     | GTNRRSD-     | VGRKc-    | SSVKEQVVECLIDQATDPNLLGRVYEGWEPWV  | 3957 |
| Query_CALIF  | 4016 | VKGDP     | KYNIRARQP[7] | EGSnv-    | LSPIQVQVCLIDLATDKMILGRVYEGWEPWV   | 4071 |
| Query_GLOMU  | 4026 | AKGDP     | NYNIRAR-     | ARQKc-    | FsvKEQVVECLIDLATDPNLLGRVYEGWEPWV  | 4073 |
| Query_LOBOS  | 4006 | AMGDS     | LHNVRAR-     | HGRvc-    | ASVQAIECLIDMATDLIDGRVYEGWEPWV     | 4053 |
| Query_RACEM  | 3994 | IMGDE     | KHNVRAR-     | IGPvc-    | SDTRQQVACLIDLATDPNLLGRVYEGWEPWV   | 4040 |
| Query_PVIOL  | 4114 | TKGDI     | KYNIRAKV     | -NKvc-    | SSVKEQVDCLEQATDPNLLGRVYEGWEPWV    | 4161 |
| Query_BOMBU  | 3799 | VTG-D[1]  | DIKTRTA[2]   | -NG-      | FLTPEEQVVECLIDQATDPNLLGRVYEGWEPWV | 3846 |
| Query_ADEDES | 3955 | LLQSS[1]  | PLLESG-      | -N-       | LTVQQVCLLQATSGAVGLITVAGWEPWV      | 3998 |
| Query_ANT    | 3877 | VTG-K[1]  | ELQARS[5]    | -ND-      | HLPAAQVDCLEQATDPNLLGRVYEGWEPWV    | 3927 |
| Query_WHITE  | 3954 | LQGTN[1]  | SLRFKF[2]    | -DQ-      | ELNANQVDCLEQATDPNLLGRVYEGWEPWV    | 4001 |
| Query_BEETL  | 3767 | VEGNS[1]  | FNVRARL[2]   | -NG-      | LSEEDQAI CLIDHATDPNLLGRVYEGWEPWV  | 3814 |
| Query_THRIP  | 3861 | LNGDA[1]  | RNIRAKL[2]   | -ND-      | LTPRQVVECLIDLATDPNLLGRVYEGWEPWV   | 3908 |
| Query_TERMI  | 3948 | VKGHN[1]  | VRSQM[2]     | -YQ-      | LLPEEQVDCLEQATDPNLLGRVYEGWEPWV    | 3993 |
| Query_FLEA   | 3869 | GMGVE[1]  | HNIRRRRI[2]  | -KD-      | LTAKEQVDCLEQATDPNLLGRVYEGWEPWV    | 3916 |
| Query_MIDGE  | 3976 | LAEGD[1]  | NNFRSQI[2]   | -KD-      | LSDVQVCLIEQATDPNLLGRVYEGWEPWV     | 4023 |
| Query_LAODE  | 3921 | LKGEK[1]  | NVRSSK       | PQY---    | GLTVREQVVECLIDLATDPNLLGRVYEGWEPWV | 3967 |
| Query_LOTTI  | 4035 | VLGDA     | KDNVRATL     | PST---    | GLTVEQVVECLIDQATDPNLLGRVYEGWEPWV  | 4082 |
| Query_APLYS  | 4142 | LMG--     | KDSVRAGL     | PAH---    | GLSVEQVVECLIDQATDPNLLGRVYEGWEPWV  | 4187 |
| Query_SCALL  | 4126 | VMGE-     | RDDTRAQL     | PQD---    | GLSVEQVVECLIDQATDPNLLGRVYEGWEPWV  | 4172 |
| Query_CRASS  | 4068 | LQGDK     | RENVRARL     | PAS---    | GLTVEQVVECLIDQATDPNLLGRVYEGWEPWV  | 4115 |
| Query_OCTOP  | 3979 | VLGTE     | G-NVRYTL     | PQK---    | HLTVEQVVECLIDLATDPNLLGRVYEGWEPWV  | 4025 |
| Query_POMAC  | 4075 | ALGDV     | QDNIRARL     | KEK---    | GLTEEQVVECLIDQATDPNLLGRVYEGWEPWV  | 4122 |
| Query_WHIPW  | 3926 | IYGAD[6]  | ETRRNAPR[2]  | SSR---    | SISVDQVVECLIEQATDPNLLGRVYEGWEPWV  | 3981 |
| Query_TRICH  | 3938 | IYGGK[6]  | EEDQSAPR[2]  | PLQ---    | ALTVEQVVECLIEQATDPNLLGRVYEGWEPWV  | 3993 |
| Query_AASTA  | 3735 | PA-AP     | -----        | -Khs-     | VLPVDAQALIHVATDPNLLGRVYEGWEPWV    | 3773 |
| Query_ABUTE  | 3654 | PSDVP     | -----        | -Khg-     | FLSPDLQAKALIDATDPNLLGRVYEGWEPWV   | 3693 |
| Query_PLASM  | 3965 | ASTG-[3]  | -----        | ADEia-    | ALSSLEQAQQLLATATAPDLGRVYEGWEPWV   | 4008 |
| Query_BREMI  | 3945 | ASFGD[4]  | -----        | DNEvt-    | TLSSLAQAQQLLATATAPDLGRVYEGWEPWV   | 3990 |
| Query_OLIGA  | 4004 | ANAQA[4]  | -----        | STTsg-    | AMSSLAQAQQLLATASAPDLGRVYEGWEPWV   | 4049 |
| Query_LIGNO  | 4384 | IDRRR[1]  | SVGGGD[1]    | AER---    | LVPMAELVDMATDPNLLGRVYEGWEPWV      | 4430 |
| Query_CESTO  | 4133 | RSSV[5]   | NLKGAL[3]    | -----     | EQTRRLVCLTCEPELLARMHGRVYEGWEPWV   | 4178 |
| Query_OVI2   | 4626 | LVGDP     | NVEVNS[3]    | -----     | LTPVEQVVECLIDQATDPNLLGRVYEGWEPWV  | 4670 |
| Query_PRIAP  | 4116 | VLGDP     | RSDLRARL     | PPE---    | GLTVEQVVECLIEQATDPNLLGRVYEGWEPWV  | 4163 |
| Query_ROTIF  | 4011 | LMGNK[11] | RSKILAE      | GEKyr-    | LTIQVQVCLIDQATDPNLLGRVYEGWEPWV    | 4070 |
| Query_SPONG  | 4110 | LLGDS     | STNLRARV     | GKRed-    | SVEDQVDCLEQATDPNLLGRVYEGWEPWV     | 4157 |
| Query_TARDI  | 4069 | CIGDA     | DGVRARH[1]   | -Drh-     | LEVEAQIECLIDQATDPNLLGRVYEGWEPWV   | 4115 |
| Query_TRICH  | 4080 | ALGDK     | QYNERARM     | PAD---    | NLSVEQVVECLIDQATDPNLLGRVYEGWEPWV  | 4127 |
| Query_OSTRE  | 3894 | LVGSN     | -----        | [2]PTSkc- | ATVEQVVECLIDLATDPNLLGRVYEGWEPWV   | 3936 |
| Query_NITEN  | 4272 | VRGDP     | RVNARAKV[1]  | -Gki-     | ATVQVQVVECLIDQATDPNLLGRVYEGWEPWV  | 4320 |
| Query_CLUBM  | 3866 | VLGDP     | VKNTRRRRI[1] | -Rki-     | ASVEQVDCLEQATDPNLLGRVYEGWEPWV     | 3914 |
| Query_MOSS   | 4050 | VRGDP     | SRNIRARV[1]  | -Gnvc-    | VSVEQVDCLEQATDPNLLGRVYEGWEPWV     | 4098 |
| Query_LIVER  | 4104 | VRGSP     | DRNMRRRT[1]  | -Gnic-    | QSIREQVDCLEQATDPNLLGRVYEGWEPWV    | 4152 |
