# Supplementary material for: Uncovering DNA-PKcs ancient phylogeny, unique sequence motifs and insights for human disease
Source: PubMed Central journal article supplement — Prog Biophys Mol Biol. Author manuscript; Available in PMC 2022 Aug 1. (PMC8021618; doi:10.1016/j.pbiomolbio.2020.09.010), 2020-10-06
Supplement: NIHMS1638735-supplement-9.pdf [file NIHMS1638735-supplement-9.pdf]

**Supplementary Figure 8:** COBALT Alignment of DNA-PKcs sequences from selected Metazoans with clear DNA-PKcs orthologues (Capitella, termite, flea, stony coral, limpet, human, starfish scorpion and shrimp) with examples of Lepidoptera Danaus (*Danaus plexippus*, butterfly), Bombyx (*Bombyx mori*, silkworm), Amyelois (*Amyelois transitella*, moth), Arctia (*Arctia plantaginis*, moth), Papilio (*Papilio polytes*, butterfly), Pieris, (*Pieris rapae*, Butterfly) and Plutella (*Plutella xylostella*, Moth). See Supplementary Table 1 for complete taxonomy.

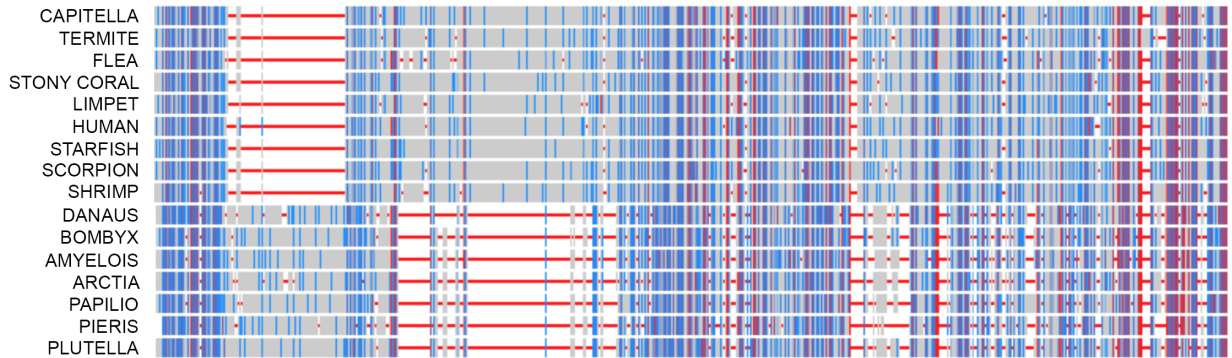





Supplementary Figure 8 Lepidoptera

|            |      |                                                                                         |      |
|------------|------|-----------------------------------------------------------------------------------------|------|
| CAPITELLA  | 759  | LEIGRSLPLARTSLNLTLESWSKSLPPDVMKPFYEQLLPYLDAYLTS [ 1 ] ADEKNDTSLVQKDPMKKQGK [ 5 ] KLLKQT | 838  |
| TERMITE    | 728  | FRVGRSMLPLARLGLSALDKWYCTLPShLVTPLLMQVLPYLDPPFLRS [ 4 ] SGQDVIIEKELMVLGRRNRN             | 804  |
| FLEA       | 681  | FKLGYNHLTALASLALETLETRWTDHLSKEQNTILLDEVLSCLPEYLOQS [ 4 ] GDDPV---KVCLITD-----           | 747  |
| STONYCORAL | 773  | FKLGLSYTPLAEAGLDALESWTTALPADKLPFLREILQCLDGYLTT [ 6 ] HNECNTIV-LITSSHHTSRGR [ 4 ] KLLKMK | 855  |
| LIMPET     | 742  | LTGLSLYPLAGIADALEYWCHNLDPHIVKPHYSCILPYLDNYIRT                                           | 817  |
| HUMAN      | 756  | FKLGLSYTPLAEVGLNALEEWSIYIDRHVMQPYKIDILPCLDGYLKT [ 3 ] SDETKNWVSVALSRAAQKF [ 5 ] KHLK-K  | 836  |
| STARFISH   | 775  | FQGLSLYPLAETGLEALERWMLHLLPDSLQPHLKVILPPLDGYLR- [ 5 ] GSDAADVVQVTVMASASSSGR [ 8 ] KLIK-G | 859  |
| SCORPION   | 755  | LQGLSLYPLAMSCLDALETWLYSLPSELLKHEYCKLPSLNDYFLA                                           | 835  |
| SHRIMP     | 746  | LQGVSYLPLAEVGLLALQWLTKSLSQEILSEHMPHVLPLLLPYLRS [ 3 ] GGEAEVHTRVITVKMAFARQR [ 5 ] KMKKES | 827  |
| DANAUS     | 918  | -----                                                                                   | 920  |
| BOMBYX     | 1014 | -----TNAPDVWFSVLPINEITTT-----                                                           | 1037 |
| AMELOIS    | 1019 | -----LDSYEHWLTNLPNIQD-----                                                              | 1042 |
| ARCTIA     | 1007 | -----NMSYDNWCKKLNLETVTE-----                                                            | 1030 |
| PAPILIO    | 1016 | -----IMNFKLWCKEFEIDKIAI-----                                                            | 1039 |
| PIERIS     | 940  | -----YEASENWLKQNLCEVAR-----                                                             | 963  |
| PLUTELLA   | 1089 | -----IDNFGTWCXKHLPLKRVTN-----                                                           | 1112 |
|            |      |                                                                                         |      |
| CAPITELLA  | 839  | MFDAE-- [ 2 ] KESELKEIQRCVLLLGLSLGGSINHALVF-G-QTANPPDLVAWD--SDQHLKFDLPFLDIKTSIYFDAFL    | 911  |
| TERMITE    | 805  | KVARKKI [ 3 ] PESELSQLQHEIISFLGQLDSTTCLALLK-D--PQEEEDVIPWAtcLQQPLVFPPLPFKDMKLNINLEKLI   | 881  |
| FLEA       | 748  | KKVKKQI [ 3 ] TPSELALLQRDIITFLIGKLSMDCSSLIS-KnISNHYDHLIPWD--LKQHLFRFLPCQGVKPLIYLDKLL    | 824  |
| STONYCORAL | 856  | PQSQH-- [ 2 ] TLTPLAKVRHKILRMFGGLGGETNILLID-NtGINSSN-AVVWD--TENHLTFAVPPQDMKPSIYLDPFL    | 928  |
| LIMPET     | 818  | FSSFSSTI [ 8 ] YESKLGVIKDRVVQYLGSLGGSINYTLT-TNsQDDISKQAIAWD--TEQHLRFETPFIDMKPIIYDFPF    | 899  |
| HUMAN      | 837  | TKNLS-- [ 2 ] EASISLEEIRIRVVQMLGSLGGQTNKLLTvtTsSDEMMSYVAWD--REKRLSFVAVPFREMKPVIPLDVFL   | 911  |
| STARFISH   | 860  | ASTTG-- [ 2 ] QDSPLRSVQLRILHLGLSLGGQTNAYLLE-TsAEEIAKVAVAWD--TQPRLQFAVPPVDMKPNIDLDRYL    | 933  |
| SCORPION   | 836  | KIKQTDL HESSELKQVHRILRFLGSGVGNQYNAFIS-AdKIKIHEVAVAWDinKQNHKFLYLPFIDVKLEIFLDFKL          | 911  |
| SHRIMP     | 828  | KRVEETA ---MQIQLMILRLIGSLDGLLRHLHTIP-QpDPTIASAAVRWVv---QKLVKATPFPHIKIDYLDL              | 897  |
| DANAUS     | 921  | LNDTNDT -----VRSARVITTEACDGS-----                                                       | 942  |
| BOMBYX     | 1038 | LLDEHKA -----VIKSLNIMLMV--FE-----                                                       | 1057 |
| AMELOIS    | 1043 | YYDN---VKSLLNIYLNITEFY-----                                                             | 1060 |
| ARCTIA     | 1031 | NMAD---ILGTLDVDSEIC--Q-----                                                             | 1047 |
| PAPILIO    | 1040 | FEDIN--L IKSLKILLNIFDKN-----                                                            | 1059 |
| PIERIS     | 964  | FNTERWE -----VVQGVVGMKIKAT--G-----                                                      | 983  |
| PLUTELLA   | 1113 | FVSDDAI -----IYALKKMLKI--FN-----                                                        | 1132 |
|            |      |                                                                                         |      |
| CAPITELLA  | 912  | PKVVTLATVSSDRQTKVAACEHLLHSLVLLMLGRSASQP---TGNPMAAIRKLPQMLKATDVEQVSRQLFEPLMLQI           | 987  |
| TERMITE    | 882  | PRVVELAMTSSDRYTRFTACELLHGIVMLILGSGQEAQ--TSHPKYSELFRKLSLPLKLGCDPDAIHRLLYNLLVLQ           | 959  |
| FLEA       | 825  | PRINKVLDSNDRQTRIAACEHLLHGIVLYILGTGMQVNV--TA---QLVHLYTNIFPTLLQLAADSDI IAMQLFDPLMIQI      | 899  |
| STONYCORAL | 929  | PRVVELAAKSSDRQTKVAACEHLLHSLVHVMGKSVTQP-gGFKKSPMEHLWKHVFPPTLLQLACDVEQVSEQLFKPLVQL        | 1007 |
| LIMPET     | 900  | PHVVELASTSSDRQTKVAACEHLLHSLVCLGRGAQQPgeVQKRYPMQKLYKLLFPAMLLKACDVEQVAKQLFEPLTMQL         | 979  |
| HUMAN      | 912  | PRVTEALATASDRQTKVAACEHLLHSMVMFLGKATQMPegGQAPPYQLYKRTFPVLLRLACDVDQVTRQLYEPLVMQL          | 991  |
| STARFISH   | 934  | PRVVELALATSGDRQTKVAACEHLLHSLVFLMGLKGTQQPegROAKSPMQLHYRRVFPALFRLSCDVEQVAKQLFEPLVMQL      | 1013 |
| SCORPION   | 912  | PRIVTSLTASDRQTKVAACEHLLHSLVFLMGLKGTQQPegLQAIYSMKKLYKNVLPALLQLACDVEQVAKQLFEPLVMQL        | 991  |
| SHRIMP     | 898  | PHVVDLAVNSSDRQTKVAACEHLLHSIIILMIGTGAQKSeTQLKEPMAPLYRHIFSAMLRLACDPPDHVTRQLFVTLSTYQT      | 977  |
| DANAUS     |      | -----                                                                                   |      |
| BOMBYX     |      | -----                                                                                   |      |
| AMELOIS    |      | -----                                                                                   |      |
| ARCTIA     |      | -----                                                                                   |      |
| PAPILIO    |      | -----                                                                                   |      |
| PIERIS     |      | -----                                                                                   |      |
| PLUTELLA   |      | -----                                                                                   |      |
|            |      |                                                                                         |      |
| CAPITELLA  | 988  | IHWFTKSNNSHRPDEALLNSLMDGIVSPSDSAVRDFSACIREFLAWSIKQTSpKEMEAGPANPKRLLKRMYSLLEHPS          | 1067 |
| TERMITE    | 960  | VHWYSSKFLKKSKEVEIILIQTLMDGITHPDTALRDFSARCLHEFVWVSVKQ-----SHVN IKYVMKQIYSPCLHPC          | 1032 |
| FLEA       | 900  | THWFSQWKIKSIETSLLDQMLGTSNETSASVRDISAKYLNFEVWVSLRQAdpEDLRSSSVNLEALISKICDYSINSS           | 979  |
| STONYCORAL | 1008 | IHWFTNNRKYETPETMALLDAIVDGI VHPVDTSLRDFSAQCIKEFLQWSIKQSeKQLEKSPINIKSLKRLYSLALHPS         | 1087 |
| LIMPET     | 900  | IHWFTNNKMGESSETMALLDTIFDSIIQADDTSLRDFSGKCLREFLHWSLKQSSvKTVEKSPVNASSILRRIFSPALHPS        | 1059 |
| HUMAN      | 992  | IHWFTNNKPFESQDTVALLEAILDGI VDPVDTSLRDFCGRCIREFLKWSIKQITpQQQEKSPVNTKSLFKRLYSLALHPS       | 1071 |
| STARFISH   | 1014 | IHWFTGNKPFESSETTALLNAMLDGVIHPDTSLRDFSACCLKEFLKWSIKQTSkKQEKSPINTKSLKRLYSMALHPS           | 1093 |
| SCORPION   | 992  | IHWFTTKRMINSDETKQFVQVIWDGLVQSKDAVDRDFSARCLKEFLQWSIKQTSvREQENP IGMNVLLNCLYNSLHPS         | 1071 |
| SHRIMP     | 978  | IHWFTNNRNFENVDTMVLLEALMEGIVTANDPALRDVSAQCLAEFVKWSRKQC--RQQNSVSSNIKSI IKRIFSPCKHPS       | 1055 |
| DANAUS     |      | -----                                                                                   |      |
| BOMBYX     |      | -----                                                                                   |      |
| AMELOIS    |      | -----                                                                                   |      |
| ARCTIA     |      | -----                                                                                   |      |
| PAPILIO    |      | -----                                                                                   |      |
| PIERIS     |      | -----                                                                                   |      |
| PLUTELLA   |      | -----                                                                                   |      |
|            |      |                                                                                         |      |
| CAPITELLA  | 1068 | SMMRLGGALMFSNIYSVFREEDALVDQFSLQILSVLVNSLALAHRDDKSLGTQEQQCSALLHVERILIKKQVTFNKDSKQ        | 1147 |
| TERMITE    | 1033 | PSKRLGAALVLSNVTYVLEEEESVNVQFWLELLYHVMNLSLEETDSILGGQEVVAVNHIERVLKEKASLFNKEDNI            | 1112 |
| FLEA       | 980  | VHKQLGAALTFNNLYMIFRENDNIVDQFWIQLSTYFVQSLMVNKDHTNI---QQLEETLNHLMRVLVEKSDLFNDRSGH         | 1055 |
| STONYCORAL | 1088 | ASKRLGAALAFNNIYTVFREESLVDIFVLEILVNYLECLSLSHGDEEARGTQEQQVQVI IHLERI IHSRAQLLVKENHR       | 1167 |
| LIMPET     | 1060 | VFKRLGAALAFNNIYQIFREESLVDYRTFQILVHFVESLSLAHKDDKSLGTQEQQCAAVLKHQLRI I I FHEDILKPKSKI     | 1139 |
| HUMAN      | 1072 | AFKRLGASLAFNNIYREFREESLVEQVFVFEALVIYMESLALAHADKSLGTIQCCDAIDHLRCRIIEKKHVS LNKA-K         | 1150 |
| STARFISH   | 1094 | SFKRLGAALTFNNIYTVFREEDSLIDQFVCEILVTVFVNSLALAHDDKSLGTQHLGVEVNLHLERIIRVKADMLNKESKI        | 1173 |
| SCORPION   | 1072 | PFKRLGAALAFNNIYTVFREESLVDKFTLEIAVHFIESLAI AHYDDKILGTQDKCKQALNHLERIMEVKAKLSKTSKK         | 1151 |
| SHRIMP     | 1056 | AFKRLGGALAWNSIYREIREDDQAVDIWTLDDLALHMTSLDLAQVDDPALGTHEQTKSAINHIERIIRVKSDFLQKSKSQ        | 1135 |
| DANAUS     |      | -----                                                                                   |      |
| BOMBYX     |      | -----                                                                                   |      |
| AMELOIS    |      | -----                                                                                   |      |
| ARCTIA     |      | -----                                                                                   |      |
| PAPILIO    |      | -----                                                                                   |      |
| PIERIS     |      | -----                                                                                   |      |
| PLUTELLA   |      | -----                                                                                   |      |

Supplementary Figure 8 Lepidoptera

|            |      |                                                                                          |      |
|------------|------|------------------------------------------------------------------------------------------|------|
| CAPITELLA  | 1148 | RIKPRGW---RDANMTTAVRWLLRQCGRPQTECRHVCMLRVQCLAPCVHEINGARELFSVLLSQGNSEYFIQRFEFGMY [ 5 ]    | 1228 |
| TERMITE    | 1113 | RRKPPPEF---EGILLKDAVSWLLKCGTVQVCECRHKMELVYVLAPELLPVCKSGSEFVSWYAATHSWTSIIRICEGSKE [ 2 ]   | 1190 |
| FLEA       | 1056 | RNI PQVL---NGCLLKHVVTWLFKHCGFVENHCRKCKEMFLKLAVLVDEINTAHMFMQNTGNFVIKSVIEIGECSTN [ 2 ]     | 1133 |
| STONYCORAL | 1168 | RRIPRGFasqSSITLHMIPLVKQCGRPSSECRHQCMRLISKLAPLLPGVNSAADWMKKT-HEDHPSSFVHRFEGGG- [ 5 ]      | 1249 |
| LIMPET     | 1140 | RQEPREW---SNKTLDIAVRWLSRQCGRPQTECRHTCMKLVYNL---CTHVQGNVYFVSPDLIDIVDKSTI IKKVFEGGGT [ 6 ] | 1219 |
| HUMAN      | 1151 | RRLPRGFpAsLCLLDLVKWLHAHCGRPQTECRHKSIELFYKFPVLLPGNRSPLNLWLDKVLKEEGVSFLINTFEGGGC [ 4 ]     | 1233 |
| STARFISH   | 1174 | RRIPREFpagVCPTRLSMLVIVLLRQCGRQTECRHQCMILYKITPPLPGHNTPQTMQNTLKEKGPDYFVSRFEGGGV [ 6 ]      | 1258 |
| SCORPION   | 1152 | RRRLRNT---NDSILPEVVEWILKNCGCLQTECRHKMELVQLAPCLSGFNCGKDYFSLHLETKGKFFLNCFESEMS             | 1227 |
| SHRIMP     | 1136 | RRLPPGF---GGDTLVDLKWLFEQCGRPALVRHTCMELLASLAPQVKGASVRDFIEKYVVGISKLSSEIVDILEGGGE [ 3 ]     | 1214 |
| DANAUS     |      | -----                                                                                    |      |
| BOMBYX     |      | -----                                                                                    |      |
| AMEYLOIS   |      | -----                                                                                    |      |
| ARCTIA     |      | -----                                                                                    |      |
| PAPILIO    |      | -----                                                                                    |      |
| PIERIS     |      | -----                                                                                    |      |
| PLUTELLA   |      | -----                                                                                    |      |
| CAPITELLA  | 1229 | GLN---QKPTMSRVQEE-NFSLNAACTWFDLVLATLDCYTWWFGERLMSPNQILIASN [ 3 ] TTIIFQVLHFFMEELAQEDISA  | 1305 |
| TERMITE    | 1191 | GIT--VTPTLKHLRN-EVALVYVVRWLRMLVTSFDCYVNLFGELVKPSVLWGTEG [ 6 ] TRIFEAAYFIIQHVCHRDASS      | 1270 |
| FLEA       | 1134 | GLN---SKPTLEHLKQTEPIFGDILKWMKNLYASLDFYVWLFENTLFTPTTLFS--- [ 4 ] SKILVTIQYFINNIVNIDPAD    | 1209 |
| STONYCORAL | 1250 | GIE---QYPTLAHIGG-HFSLKETILWFEFVLAALDCYTWSFSEHLLSPSWVFTSSE [ 5 ] SVLLVSLKFFLHSLAMFGITE    | 1328 |
| LIMPET     | 1220 | GIS---ACSTLLKISD-TFTLTSTMNWFDMLLAGLDCYTWWFGEDELLTPIINIFSGTG [ 3 ] SKLFESLEYFLSNISLRSIDE  | 1296 |
| HUMAN      | 1234 | GIL---AQPTLLYLRCG-PFSLQATLCLWLDLLAALCEYNTF IGERTV GALQVLGTEA [ 1 ] SLLKAVAFFLESIAMHDI IA | 1308 |
| STARFISH   | 1259 | GIS---KYPTLSMTCG-PFSVLACSWFDLLAALCEYNTF IGERTV GALQVLGTEA [ 1 ] SLLKAVAFFLESIAMHDI IA    | 1305 |
| SCORPION   | 1228 | -----NTVPSFNQ-NDGLKPIINWLEGLHMLDCYTWWFGEDELLTPIINIFSGTG [ 3 ] SKLFESLEYFLSNISLRSIDE      | 1299 |
| SHRIMP     | 1215 | GISyvkNPTASSKHI-GSSLDKINIFLEALSASLDGVCWLIQGGIVPAKLLNHSE [ 1 ] -QLFSATYTFINEMALLTVESE     | 1290 |
| DANAUS     | 943  | -----ILS-----                                                                            | 945  |
| BOMBYX     | 1058 | -----LRS-----                                                                            | 1060 |
| AMEYLOIS   | 1061 | -----LHS-----                                                                            | 1063 |
| ARCTIA     | 1048 | -----KIQ-----                                                                            | 1050 |
| PAPILIO    | 1060 | -----VEN-----                                                                            | 1062 |
| PIERIS     | 984  | -----VKS-----                                                                            | 986  |
| PLUTELLA   | 1133 | -----LQK-----                                                                            | 1135 |
| CAPITELLA  | 1306 | AVKLFPPKVDAG [ 3 ] FTPREREDYNQTKCTVIVRTLFSICTMFGnYKTESLKV IPTSFWSNLDWTLTLLAVLQPTQLGFNM   | 1385 |
| TERMITE    | 1271 | VTCLLSFDTKD [ 3 ] ITPWEAESFDRTKCFVTIRLLDMISTVL---KSGEAGCLPHSLLNL-QLWQLIVACVLHPGSLGFDL    | 1347 |
| FLEA       | 1210 | LPAFL--DASV [ 3 ] ISIKDKEKFIKFNFTFIMILTFVSKIL--FCDDADELITSFSLNRLSNVNVNCLFCPQDLHFN        | 1285 |
| STONYCORAL | 1299 | ATSCFTSGSPSR [ 5 ] FTPKEIDDYFRAKCTVIVRVLNFLTILLGqDFPQETLKTLPPEFWSDELFEVVLSCVLEPVGVFNM    | 1410 |
| LIMPET     | 1327 | VSKLFKE--SS [ 3 ] FTPREIEDFNRNKCTVIVRINFLSVLIGkYPKDAIKVLPGTVWSDTLWELLKCVVQPSVGFNM        | 1374 |
| HUMAN      | 1309 | AEKCFGTGAAG [ 2 ] TSPQEGERYNSKCTVVVIMEFTTLLNtSP-EGWKLKDKLNCNTHLMRVLVQTLCEPASIGFNI        | 1386 |
| STARFISH   | 1336 | AARIEYXGSK [ 7 ] FTPRESEYNEKCTVIVRVLWDFLTVLLenYASDAVKVIPKSIWQDSLFDLVVTCLLQPTVVGFNM       | 1419 |
| SCORPION   | 1300 | VQAFFTHESVK [ 3 ] FSPKEKDEYLRNLNCFIIVRLINFTTIVenYHLQ-LNTIPSTFWSINFWNCIYSSVLNPKLGFDM      | 1378 |
| SHRIMP     | 1291 | YMKNHDAFQNA [ 1 ] ATPYETEATAKLKCTVIVRLLDFVSVVlqGPKVASLLSQHSVWSATMFSLLTCTLPDASVGFDI       | 1368 |
| DANAUS     | 946  | -----KDEFIVS-----w-----                                                                  | 954  |
| BOMBYX     | 1061 | -----DLIKT-----w-----                                                                    | 1066 |
| AMEYLOIS   | 1064 | -----FMNKLA-----LW-----                                                                  | 1071 |
| ARCTIA     | 1051 | -----ALNILADVFDH-----                                                                    | 1061 |
| PAPILIO    | 1063 | -----DLIKEI-----KIw-----                                                                 | 1071 |
| PIERIS     | 987  | -----DVVGEAVN-----w-----                                                                 | 996  |
| PLUTELLA   | 1136 | -----ITSLLPETCELIQRW-----                                                                | 1151 |
| CAPITELLA  | 1386 | GQVEVMNHLPEQTLGLTLQILMRsLPRNLAQELIESVSRHLNMSS-cDLSSKLP-IPLEP [ 2 ] DYIQLRLLVSGFEQL--     | 1460 |
| TERMITE    | 1348 | YNTVEVTDGLPKNLIQLLGVLQETLPSSQLLEELNSELGRAVSSMQ-tDVLSNLQ-DLSLRND [ 1 ] VTLEQRQLLKGLEIL-   | 1421 |
| FLEA       | 1286 | ENNYIGQNYLIKLNFIENLRQyKNDTYHYHQIEGSII EKLNECT-heYFNETE-vNFNSV [ 1 ] LSVAKNNCLNASSIck     | 1361 |
| STONYCORAL | 1411 | GDVEVVEKLEPEQTVGLCKLLVQRLSGCEBLERKGLLEKIALGShcNLPDQLPFLPSNPQ [ 4 ] DCLRLAYLVQGYQQL--     | 1489 |
| LIMPET     | 1375 | GDVEVMNHLPESE---VPTKLMFVGTITNFS-----DLFSLTnLSLNNP [ 2 ] GHTVLQHLVSGYIILL-                | 1431 |
| HUMAN      | 1387 | GDVQVMAHLPDVCVNLMKALKM---SPYKDILETHLREKITAQS---IEELCaVNLYGP [ 4 ] DRSRLAAVVSACKQL--      | 1458 |
| STARFISH   | 1420 | ADVEIMNHLPKTRKLLRMLSThLPANLRNLSKAVTRSRVTKSShhdLTKLLQsMFGRDE [ 4 ] DHGKLIHLVKGYEQL--      | 1498 |
| SCORPION   | 1379 | TDTYIFNQFPKTRKLLRVFYEyMPKPLYNFNHLYEYL--ESKcNIYNLFP-LNLNDK [ 2 ] KILEIQEMLLGYEQL--        | 1452 |
| SHRIMP     | 1369 | KDTEVSKHPLSRLEELIGILARrGPSEVIEGYSdVLEKQLQKPE-ndI IKMLP-LSLSET [ 2 ] INLRSHVIEGIGIL--     | 1443 |
| DANAUS     | 955  | -----KDMFNSFLDPSHLRMCLETS-----w-----SEGL--                                               | 978  |
| BOMBYX     | 1067 | -----PDSIMKV---TPKKS---D-----LEYYI--                                                     | 1083 |
| AMEYLOIS   | 1072 | -----PKRVMRK---YLEGATGTE-----LSFL--                                                      | 1091 |
| ARCTIA     | 1062 | -----PISYSRVWMDILLEKENQIR-----HVI A--                                                    | 1085 |
| PAPILIO    | 1072 | -----LPLIVEKHQNGIKKRF-----IPYF--                                                         | 1091 |
| PIERIS     | 997  | -----AKAVREIYDAGIERYA---PH-----KPYL--                                                    | 1018 |
| PLUTELLA   | 1152 | -----PKELLLFKSNYIQDFLKS---PAEYKGLLLECQE-----MAYL--                                       | 1175 |
| CAPITELLA  | 1461 | NSAGLNLNTLVSKSseK [ 4 ] LVNVTV-----FMGMVTAVD- [ 2 ] PTLvNLSPV--SQSLAEKMLTLAFQMGYPEKNLVE  | 1530 |
| TERMITE    | 1422 | HKCGMLSHIVKELP--N [ 4 ] DGNQIVkh--LFSALVEGQGD [ 1 ] KRTvVLQPA--AFSyaESLLKFAPLLNKEVTVIE   | 1493 |
| FLEA       | 1362 | HSYVTRSKFWSSLA--N --GQYITn--IYNGLIEENTD [ 1 ] DTKIGIFPEhVINYGKILSVIFEHVDCDKLLIE          | 1429 |
| STONYCORAL | 1490 | HCAGLLLPALKAKA-rN [ 4 ] YAVKLFt--AVYDGVKPSLNV [ 2 ] QTV--ILDPA--SQHLASKLLDLAYDLGLQPNYLM  | 1562 |
| LIMPET     | 1432 | NKTGLLVNTNV---qQ [ 4 ] TVYKVCYpQFFLGMNIPVSV [ 12 ] KKIiTLTPA--ASILGKSLDLSPFKLGDKNVLT     | 1514 |
| HUMAN      | 1459 | HRAGLLHNLPSQS--td [ 4 ] VGTELLS--LVYKGIAPGDER [ 3 ] PSL-DLS---CKQLASGLLELAFAGGLCERLVS    | 1530 |
| STARFISH   | 1499 | HQANLISAATTHG--sg [ 2 ] FAVKLFi--TVFDSLTSDEA [ 3 ] LQA--NLTP--SVELAESLDDLAFLLGIEAKMLVS   | 1570 |
| SCORPION   | 1453 | IENKLPKQCNCS-- [ 2 ] LACDMLS--SVWESCILETEI [ 3 ] IPI--LNPS--VLNFGKMLTVALKLDISSEDLK       | 1521 |
| SHRIMP     | 1444 | EKSGWLAKCNVVSy--S [ 4 ] LVDWLCG--SIFKEQNLVSVG ---iSPHPS--LLKFLYTVMQLAITLDPKVKHLL         | 1511 |
| DANAUS     | 979  | -----TDLTYVALTYMD-----DVEIKNILTR-----                                                    | 1000 |
| BOMBYX     | 1084 | -----SSALSASLKASS-----RDDIKRLI-----                                                      | 1103 |
| AMEYLOIS   | 1092 | -----TDCLTAAVKVTG-----FNVKSVLL-----                                                      | 1111 |
| ARCTIA     | 1086 | -----SDMLSIAEKCLS-----CSEFEDVL-----                                                      | 1105 |
| PAPILIO    | 1092 | -----TDLHLHIFKFLP-----TPDIRVVI-----                                                      | 1112 |
| PIERIS     | 1019 | -----MDVLCVALPALN-----IQEFELFDD-----                                                     | 1040 |
| PLUTELLA   | 1176 | -----TDVLAALSINFLK-----PAEYKGLLLECQE-----                                                | 1200 |



Supplementary Figure 8 *Lepidoptera*

|            |      |                           |                                                           |      |
|------------|------|---------------------------|-----------------------------------------------------------|------|
| CAPITELLA  | 1531 | LIFNSNNIHHVSTSVQCSPH--    | GtLfYAAFPKSVVNLFVKSVEKVPVLLMRHLEANGET-LSSVLIGIADH-----    | 1598 |
| TERMITE    | 1494 | CIKQASIQNPATHSSVSLHGDI[1] | ---FFVTFRSAIILBHMILACFEHVSCLIKDISANNVQwVISTVTEILQYYAKIRRS | 1568 |
| FLEA       | 1430 | SVLNDVHIIGNITESKLAHQ[1]   | ---FYSIFGNQI IKYLMRFPIDAVKTTITNDLGASPIKRHIIVDFLIQIILIYIRN | 1504 |
| STONYCORAL | 1563 | SIMEDS---NDNPSSCGCT--     | ---FYRIFQTSINGFFIERANIHMANILMKAASSPFL-VLSLNLGILDQVIRDKIL  | 1631 |
| LIMPET     | 1515 | ALLNDDMIQKTPSVNLQ-H-      | GeAFFLMFKSVICQYIAENGRITIPILTNQAKTHGRK-VNSILGATVDYIARDRTL  | 1588 |
| HUMAN      | 1531 | LLLNPAVLSTASLGSSQGSVI[4]  | GeYFYSLSFSETINTELLKLNLDLAVLELMQSSVDNTKM-VSAVLNGMLDQSFRRAN | 1610 |
| STARFISH   | 1571 | CLLDKALFSGRSTSSKGAV--     | ---FYTFKTLNGEMAVQAQKVIPLLVREGGKDVTV-VSSVLNGLLDYLTSSREV    | 1642 |
| SCORPION   | 1522 | KLLDEQQLVYSNLKTKTRRGL     | --IMFSTYQQEISLFAKINSKHFISLMMNINKSKTT-VLKILVGLDSIGKVKF     | 1595 |
| SHRIMP     | 1512 | SWATNSDTSVSGTSGQEVKGS[1]  | ---VLSILGPKLIPQFLLESPPDALSRCVEMIREGRFLpAMGFASALLTCLIRNADI | 1586 |
| DANAUS     | 1001 | -----GPGGE[1]             | GlfKFASLSVFPFLNAA--LLE---SCSLLLYD-----VVRYANR             | 1042 |
| BOMBYX     | 1104 | -----GGDGRDL              | ---CRRHVVKVFGFLVKSPSVLLDGDVTSAYSLLD-----DVVDCYVRMRC       | 1155 |
| AMEYOIS    | 1112 | -----EGKSADL[1]           | GvKFCGQPMRVFLNSFLKKPVLMDDDVGGDCCVLD-----VVVRFCVWRKCP      | 1168 |
| ARCTIA     | 1106 | -----EKNE                 | --DFVLKYLRYVFERIL----LTEGVVNTNLPFIE-----VLKYFCINYKKY      | 1150 |
| PAPILIO    | 1113 | -----L[1]G-               | FVSDTFMPVVFHLLVMN-----FDLVKILHQ-----RDVMKVLVKYSKI         | 1153 |
| PIERIS     | 1041 | -----DvNFCKWAPVALVYIE     | QNRKTPPLPKKSQIAELLPL-----DVMKVLVKYSKI                     | 1077 |
| PLUTELLA   | 1201 | -----NGSNEKD-             | GlKFCRFVKS FAGYFLES-NILMDVEMKGLCVLIH-----DVVKHFGRLES      | 1254 |
| CAPITELLA  | 1599 | ---G---KMVSRAIVSQ         | SSLSVWVWSEstAsLDTKMVAITLLTKLMQIDST-viIDVKNSFYVVF          | 1670 |
| TERMITE    | 1569 | KHQDSttICAFERSIVNH        | NKLSFSV-EG--NSEQVQVLLGLLVNVARIMPQ---PDRGLARCEALQ          | 1642 |
| FLEA       | 1505 | EKENEFllSISSETMLNH        | NDIVQHVBTES--DAVDLVTYLGIIVPVSNV-----GPNYLAEW              | 1572 |
| STONYCORAL | 1632 | RTRNG---SSFVAVLLNN        | TSEFIFWRTH--sAMDLRHSILMILKMLLDLPA-kvTDCNRLFPSP            | 1706 |
| LIMPET     | 1589 | RKKEG---PNVASTILSE        | KKFSTWWTNN--aPELQNLAISSLTQVLLIDSR-vtSHTSHSPSST            | 1663 |
| HUMAN      | 1611 | QRHG---LKLATTIQQH         | KKCDSSWAKD--sPLETKMVAIALLAKILQIDSS-vsFNTSHGSPFEV          | 1685 |
| STARFISH   | 1643 | RRTHG---MSVHSAITQD        | DILMGLKKG--sPDLQGSFALLMLRLKLQIDAK-fvSDTTHPVFSSV           | 1717 |
| SCORPION   | 1596 | RRYG---KDIINSIMCQ         | SRLQQCLEES--cDIDLQNDIITLTIKMLIDSS--fIKGNVYDSN             | 1670 |
| SHRIMP     | 1587 | RKYS---KVVQSFLLKH         | PTLAQAQGT--SLHQDSVLLSSFLDIDREgtiKSHCTSSRDMV               | 1660 |
| DANAUS     | 1043 | RGRRG---EVEDVIQI          | PHYEKIATNK-----QQQFFME--CLPGV-----RSEDVVY                 | 1100 |
| BOMBYX     | 1156 | ERWRG---DVLNLVDGL         | PVYEQQTEFS-----KQALLVLSLRFVP-----PPPTSPPV                 | 1214 |
| AMEYOIS    | 1169 | EAVYE---QLLLDVDEV         | PVYDSDTDFN-----QKCQLLNMMSCLFP-----LSRDSNP                 | 1228 |
| ARCTIA     | 1151 | EKHYD---RLLYLVEKI         | PNPFE-QLDFE-----VKLLVASELLRLPRS-----VGLISP                | 1209 |
| PAPILIO    | 1154 | ENY---DVLVDVQLE           | PEFEKVSFTE-----QQYLLLEVFSFLPNK-----LLPESK                 | 1212 |
| PIERIS     | 1078 | ---FCK---APVEFLDRP        | ADFESENSTFE-----EKIEVALVIGAGEAC-----LWAERIV               | 1127 |
| PLUTELLA   | 1255 | GVICR---KVVETVDQM         | PTLESQTLTE-----QICALSDDLQFLDTS-----DLQLSSNP               | 1314 |
| CAPITELLA  | 1671 | LQFKTRVLDLLIFFCNLPAB      | --ENKQLESCLNQFVADCFPMSLEFhagsQQKCYITALDRLLAMELS           | 1748 |
| TERMITE    | 1643 | LHYKSRALDILLVCLAGPQED     | --TNQELRSALQTLREHPFLQSTELHSGSVYSGFVNAFRKILRGL             | 1720 |
| FLEA       | 1573 | LDTKSKVLDVLPFTITGPKDI     | --ENPELQALKTfQSLHFPLESKEFREGS IERASYSAFSALLNSL            | 1650 |
| STONYCORAL | 1707 | LAFKQVLELLPYFTKSTEE       | --YLRRLEKGLNAPFVNNIPKLSSTEFVTGGPQYNDVYVQTI                | 1784 |
| LIMPET     | 1664 | LAFKMKVLDLPPFPAMAQET      | --YITKLSLDRFVADNFPKISNEFTKGSPRYQYDILSIAL                  | 1741 |
| HUMAN      | 1686 | LHLKQAVTLLPFFTSLTGG       | --SLEELRRVLEQLIIVAHFPMQSRFPPGTPRFNNVDMCKF                 | 1763 |
| STARFISH   | 1718 | LTFFKQVMDLVLFFFTSLPGD     | --EQTKLRALDRVADNPLNSSEFRVGSFKYIDYAGALNKILTA               | 1795 |
| SCORPION   | 1671 | LEFKICVLDLPPFF--LCDA      | --FLCKVQAAHLNLDFTNHPFLYSSELKPGSSQYNDYHLAFT                | 1746 |
| SHRIMP     | 1661 | LQAKTKVILKLLPFFPFMGED     | --IAKSVSEALEMLSNHPFLHSTFESEGGARDREYHQAICEIL               | 1738 |
| DANAUS     | 1101 | LETKMMIDLVLPK-----        | SLP LLEF--PLPSRLSEL-----RGSLANCFRALLDALAT                 | 1158 |
| BOMBYX     | 1215 | IQRTCLVAGL-----           | pAGEEYSAAYSSP--SGVVGPRLEA-----ARGRGPALRAL                 | 1276 |
| AMEYOIS    | 1229 | TENSRLMELL-----           | pGGEFADCYATFASNTLSPRAGC-----GRA---ALRAAL                  | 1289 |
| ARCTIA     | 1210 | LDHKLRLM TIL-----         | pGGSEYSSCYRSM--ACTLP IHLSEM-----GGDHAGVLR                 | 1272 |
| PAPILIO    | 1213 | CEMKTKLIGLL-----          | pPGEAYKSTWSY--VGLLPARLSEA-----QGESGLLL                    | 1274 |
| PIERIS     | 1128 | PLHMILQLLPLQSDMRRRA       | -----STALSSA---GVTGAGGA-----CAKEGVAVA                     | 1191 |
| PLUTELLA   | 1315 | NDDKVRMLAVLLVLLKNDVGS     | dvQEKYNVALQSY--ATTLVLRSS-----LTAHAPAVSALL                 | 1385 |
| CAPITELLA  | 1749 | SVICKEVQKHT               | HENAIQSAFQRFIKRL--PKDKHKLALDVPYKIFsQEGRF                  | 1823 |
| TERMITE    | 1721 | AMAASESQHV                | LEDOIQSLSQIFIKRL--EDKQVQAIEAVFKVFDVDDQYDP                 | 1794 |
| FLEA       | 1651 | SIIAADDLHI                | CEDEIQEKLCRTIENC--APENQFNLRIPYFQI-KSREYTP                 | 1724 |
| STONYCORAL | 1785 | AIFCERERQH                | HEDOIQQSFIAFIQRLHPDQKAAAMDVCLISIFNERDYQ                   | 1861 |
| LIMPET     | 1742 | SIFCRESKHV                | YEDEIQDVIARYTKRL--VIYQKALDLIPYKIFtSSGSVY                  | 1816 |
| HUMAN      | 1764 | EVLCREQQHV                | MEELFOSSPFRRIARRG--sCVTQV--GLLESVYEMF                     | 1838 |
| STARFISH   | 1796 | SIMCRDEKHA                | YEDEIQSLLAAFIKRL--pEEKQT--AAFVAYQIQENSP                   | 1870 |
| SCORPION   | 1747 | QIMCRESTHL                | LEENIQKCLKLKCKRT--DSNKERLAEVPLKMFLEDEL                    | 1821 |
| SHRIMP     | 1739 | NLFCREDKHR                | YEVVMHESLEKFMKKL--PLLQQEFLKHIYDMYnDPT                     | 1813 |
| DANAUS     | 1159 | TLAATDPTPG[1]             | WDSALDSCMSKLARTE-----HRGSWQAIYDTC-----                    | 1223 |
| BOMBYX     | 1277 | ALAAGDDTKG[1]             | WDEAIDSCMAAVAKHR-----DVTVHETIYAWT-----                    | 1342 |
| AMEYOIS    | 1290 | ALAHTDDEDS[5]             | WEAALDACSASLARSD-----NFKACDILLES-----                     | 1359 |
| ARCTIA     | 1273 | TLAAADDTKG[1]             | WDDAIDASMSSVADRR-----DENIYDAAYQTM-----                    | 1338 |
| PAPILIO    | 1275 | QLIAGETASG[1]             | WDDAIDASMVSLSKRN-----DMSVYGTLYAYC-----                    | 1340 |
| PIERIS     | 1192 | TLADDETCG[1]              | FEAALSQWARNANAANA-----CAADLTLRHELCE-----                  | 1257 |
| PLUTELLA   | 1386 | ALPLSPPLPA[1]             | LSTALRTECAASISTHA-----G--TLHAVRELCE-----                  | 1449 |
| CAPITELLA  | 1824 | FYCEHIKEIMKI              | ---EAKPKAPEHAFEAQTSKIGCFELLEVMSRLPNTD                     | 1901 |
| TERMITE    | 1795 | FYRHCIQDLQGL              | ---NVTLDRCRGLQTEHQVGRIGANNILEPLVHLESSE                    | 1871 |
| FLEA       | 1725 | FYKNFEEFNNL               | IESPYTSASRANLDKQAYVDRTCFFHLITILVY                         | 1803 |
| STONYCORAL | 1862 | FYQDIQQLMSVL              | ---EAKELKPTDPNPFESQVTSKLCFCFLVLI                          | 1938 |
| LIMPET     | 1817 | FFLTHISFIMSEI             | ---EAKLVKGSKAELNQLTTKIGCFQMLBLLYSRL                       | 1893 |
| HUMAN      | 1839 | FFSTIVDAIDVL              | ---KSRTKLNSTFPDTQITKKMGYKILDVMYSRL                        | 1915 |
| STARFISH   | 1871 | FFKECIKNIGGI              | ---DAKTIKAPETVFNQVSKTCCFQVLELMYSRL                        | 1946 |
| SCORPION   | 1822 | FFIDIHEIMQIV              | ---KSKRKSSNE---IQLVSKIAGFLIILTYLSKE                       | 1886 |
| SHRIMP     | 1814 | FLLTVISAVMAGM             | ---SAPVHGRSDPQHKLTVT-KVGSFMLIQIMYSK                       | 1888 |
| DANAUS     | 1243 | FASPLPEFLRL               | ---RQR-PRGSDTRVNKRLTEQTRAFNILEIIFQ                        | 1299 |
| BOMBYX     | 1324 | FISNVNMLIDML              | ---MTG-RAASNALAYEQGVNYTRALSVLAVAF                         | 1416 |
| AMEYOIS    | 1360 | FFARNLNSLRL               | ---ARK-PRDCISVKHQCVQVTRALMLLQLAF                          | 1435 |
| ARCTIA     | 1339 | YASKIIPDLSLE              | ---KTGFEPTNTEVFRRVERVYKAFSLIQMI                           | 1411 |
| PAPILIO    | 1341 | FFSLKLDLLVL               | ---KTLRFSVYNSPTCQVYVNYIRALVLLRVCI                         | 1418 |
| PIERIS     | 1258 | LMSQVSNRLIRAI             | ---RVKPRPGDRRALIRCLNDYVRRALLLTIA                          | 1331 |
| PLUTELLA   | 1450 | FFCACMNSILSDL             | ---WPK-SKSSNNF---IQYAFALAQAF                              | 1517 |

Supplementary Figure 8 Lepidoptera

|            |      |                                                                                    |      |
|------------|------|------------------------------------------------------------------------------------|------|
| CAPITELLA  | 1902 | TKVSNATK-GE---NMNGETLLIPLRRALHCAAYNTLIAAL-ICTQKEKFFYTAFLFTENPAKNQLHWNINVDQDVVYE    | 1975 |
| TERMITE    | 1872 | TSRAYKYR-SEtLHDNLtGNVQLVELFRQSQCAAFNTLVAII-SNVKCELRFPTGLLFSENKAK-EVWPGLVNCNKEYA    | 1948 |
| FLEA       | 1804 | TRKAFKAR-TFmNYD---ENDTESAEELFRQYQCTAYKTCLILI-CSTKSDLKFFYTGLLFRENPLKKEIWRNIIDCKRIYE | 1879 |
| STONYCORAL | 1939 | TKAARAA-IE---DMRGETVALELRQFHCAAYNALVALI-CCTQTDLKFYVAFVLFSENPIKGLLDDNLVDCNRTYE      | 2012 |
| LIMPET     | 1894 | TKCAHEAR-SE---DTRGETELVELRRQYHCTAYNLMSII-SCTQTEAKFYVNCFLFSEKPSKQGLLDDNLDCMKPE      | 1967 |
| HUMAN      | 1916 | IKLCYDAF-TE---NMAGENQLLERRRLYHCAAYNCAISVI-CCVFNELKFYQGFVLFSEKPEKNLLIFENLIDLKRRYV   | 1989 |
| STARFISH   | 1947 | TKACHAAR-SE---DIRGETNALERLRQFHCAAFNTLVAII-SCTQTDIKFYNAFLFSENTAKQGLLDDNLIDITKNYS    | 2020 |
| SCORPION   | 1887 | TGFATAAR-KE---NLGESISKEFCRKYCCAAAYNAVAIAI-CCTQTDKSFYSTFLFQENFAKGEYIWEINIIDLKNLEYT  | 1960 |
| SHRIMP     | 1889 | FRYAAKIS-KG---ELRHDTQTHAELRRLCAAYNAIYAVL-ACVQNDLRFYTNFLFSANPTKGEVIEWELVDCSRNEI     | 1962 |
| DANAUS     | 1300 | CKLVCATR-----TQYDKTGVDEYRFLQLANFACLSALLCREPRAP-VYSCVF-----DVKVWSELVSEVSAA          | 1364 |
| BOMBYX     | 1417 | CKLCVTL--RdaVTCPEGAGGGLRGACRAFVVAAYKCLTAAL-CR-WKQPKAYVTLF-----DEKALSNLMDPEKRYE     | 1485 |
| AMEYLOIS   | 1436 | CKLCVTL--RgdARAPHVT---LACYNYRQCAIYNCLCAAI-CKSSPADKFFYDFIT-----GPEAWGKIIDACGPYD     | 1501 |
| ARCTIA     | 1412 | C1YSMTL--RtkVRCPDNASAAQLDACLRLQTSAYNCLTAAI-CKRRPSQKQYAAVF-----DMSAWTKIVDPHVHQD     | 1481 |
| PAPILIO    | 1419 | SMLCNDLIPqNrrrKIPNLGFDSTIKNCLLFYCCAYNALSVAIwCRQSPDPKFFYSLVF-----DVKTWCRIVDPYLEYQ   | 1491 |
| PIERIS     | 1332 | STLVCVALR---ISVRTAYDDNMRLEFRVFFCANFKCLSAAFLCRQGASS-TFRALR-----DDAVWERLVTQTSISLP    | 1399 |
| PLUTELLA   | 1518 | CKICKTL--RdgVAPGNDV---WAYRFSQANFNCFAAVL-CKTRSGEKFFQVLF-----HDTVWDKIVDDTKLYK        | 1582 |
| CAPITELLA  | 1976 | FPLEMENPIERRKKFVSIRTSVR DVDPDDEPTQPASSV[ 3]ASQYLAGSSLSTDVSQDFGSSMVSSADS[ 6]SR      | 2053 |
| TERMITE    | 1949 | LALDWEIIPARRKQVLSIRCAR[ 4]ETLGFASQSVRYLIPS ASQYLFDSLINEDVTLDFSTSVVSTEAR PG         | 2021 |
| FLEA       | 1880 | FQOEFENYPTKTKHLVEIR----KAASVDESELNLYLTQ QS--IFSSLSQDITFEDMTHNVVRR--H PV            | 1940 |
| STONYCORAL | 2013 | FVELLSAPLERKKQF---RMQAR IPSPKENSELESAG-[ 9]YSQYLSLSEDSIEDISQCFSSPIQVHS--[ 12]ES    | 2096 |
| LIMPET     | 1968 | FKAELDSPLERKKRFVSIIRNEVK ETRQGESEE-SLFSS[ 3]STQNI EESSLSDDLNQYDFNSGTAQVFFS[ 6]TS   | 2044 |
| HUMAN      | 1990 | FVVEVEVPMERKKKYIEIRKEAR EAANGSDSGSYMS--SLSYLADSTLSEEMSQDFSTGVQSYSYS[ 12]RR         | 2069 |
| STARFISH   | 2021 | FEIEMNAPMERKKRFVSIIRNQIQ DTVAGSSQSDSGI[ 10]STQYLANSSLEDIQDFSGGVQVFNAS[ 17]KR       | 2116 |
| SCORPION   | 1961 | FPIELDT-IERRRKFISVRHENR ELNSNKTNLNFASLK[ 2]PSQYLSLSDSDVYQDFSSSELAFSQD[ 11]SN       | 2041 |
| SHRIMP     | 1963 | FVDEINFRPASKKRFVAVRQKLR ETAREEGAVAGTVQ[ 2]ASHYLSLSDSLREDSQDFVFNNSVVLMSQ[ 3]SS      | 2036 |
| DANAUS     | 1365 | KPQWGHVRYAPSVSPVSVSS --VPSVPSRLPSKLS LRSVPVFLRSLSENPFMYDLVEEKE--EVS --             | 1428 |
| BOMBYX     | 1486 | LPIPK-KWSRRRCVRRQVPADTGA --APAAASGGG VTRTRPLRLTLSDNPLHFDLLEPHECEEVT --             | 1546 |
| AMEYLOIS   | 1502 | LPIVVK--SRRKIKCVSIPIPGSA --ATSSTRSGS--- TRSRMFLRSLSEDPHKFDLYDREE-EQVE --           | 1561 |
| ARCTIA     | 1482 | LWPRRA--YWGDTKSRQPGGADQ --GPSSVSTLTYSRT VRTSLFMATLSENPMQYDMLPNEDEEDN --            | 1545 |
| PAPILIO    | 1492 | LPLVE-SWQKRTMHQYAGVKLEE --SSGLLTSASS--- STARTVLRSLSENPFGEFDEGLIQDDQEQC --          | 1552 |
| PIERIS     | 1400 | IVTQS-----YVSPRPMEMAS VQSRVFLSTLTDPLLYDLHEGLVQTETS --                              | 1444 |
| PLUTELLA   | 1583 | LYIQLELRHQSTKRHTLPAGASE --TELSLSQFTA--- PVATFTRTLSDNPRAYMLEETRP--TEP --            | 1642 |
| CAPITELLA  | 2054 | ESSIEVPDVLKHEHYIEMEDALNQHECMALSLALQHMKNLQITP[ 1]VEKGSKPS--SMPDWMKNIHDKIKNSDTQL     | 2128 |
| TERMITE    | 2022 | HDEKTPKESGAESTEVILESDDLNMHECMATLFCGVI EHMWDQGISP[ 1]PDAETKDA--ALPPWMSMRKCLSDYSQPR  | 2096 |
| FLEA       | 1941 | DHKTKEVNFNG---TQIYLTEDFLNDHECMSICGVIGHMVTKGISP[ 13]TKQGSVVP--VMPSSWMEALVQLANAETPV  | 2024 |
| STONYCORAL | 2097 | SSTAEOQDDWYEVSEDTLEMDLNRHESMAKMSLLKHLVDKIKISP[ 1]QVKDVPPT--DMPANMAPLHKIASSSTHL     | 2171 |
| LIMPET     | 2045 | SNVQPDQFNNTVDYIELELDELNQHECMATMVALIKHLH-TVITP VLKGTLPK--EMPTWMSYFSEKMTNPTAFS       | 2117 |
| HUMAN      | 2070 | EQRDPT----VHDDVLELEMDLNRHESMAPLTAVLKHMRSLGPP[ 1]GEEDSVPR--DLPSSWMKFLHGKGNPVLV      | 2140 |
| STARFISH   | 2117 | YSNEETPTVVYQGEYIEMESDALNQHECMASLTAVALKHMQANKITP[ 1]IPEGSKAS--EMPGNMSLQKLLTSQSTHV   | 2191 |
| SCORPION   | 2042 | PSNEAKDDDLVSNITVELEIDDLNQHECMSLTMVLQHEMKIQI--- --LSSSPK--EIPKWLNDLCKKLEDYSVHR      | 2111 |
| SHRIMP     | 2037 | ERVITGANEMGGVLPVHMDSQSYNGHEVMANLTAVINHMVDAEIMV[ 1]HKGDTVPKATDVPQWMTLVQOKLDSADTPR   | 2113 |
| DANAUS     | 1429 | -----TEFY---LPDNLNRQCPCLPYVMGLLSTYF---AL ---TVET---GWAGAVKEAL---RGR                | 1475 |
| BOMBYX     | 1547 | -----TEE---WRVDHTELNGLEACLVSRLALAAPCAAL ---RRAA---AALCDTAAALCGAAAGS                | 1601 |
| AMEYLOIS   | 1562 | -----IQE---IEMPSSPINAHPCAPTVALIT---HVRT ---RMCF---ARVCELLA---RTLTD                 | 1607 |
| ARCTIA     | 1546 | -----DVEEEKPVGYENHPLNAHGCLVSTITALLE---HSST ---LEHT---DNLTKLEGL-TSNLPV              | 1598 |
| PAPILIO    | 1553 | -----ELC---IPENVINQHPCAGLITMSLS---RATS ---LPHT---TWLTTTLTTL-TNTYK                  | 1599 |
| PIERIS     | 1445 | -----DAEMTE---QVGAITWAHECANVLSLRLHRSV---RA ---LPPD---LYLTPVRAAL-VTSRTR             | 1494 |
| PLUTELLA   | 1643 | -----QHS---LQVQDNELNHNPCASALTGAIA---YL ---SRQQ---ANLPTVPE---TANR                   | 1685 |
| CAPITELLA  | 2129 | NIRLFLAKVILNGESVFRPYASFQWQPLVALAT---n---MGGLNYFSLDIIVTLLSWHEIAIPEETTVDIAMT--SH     | 2198 |
| TERMITE    | 2097 | NIRLFLPKIILNVEKFFHPYAHHMNSLKAIT---DGVVGRAPNYLLSDTVAMLADWCRKTTSLPAKSDHHLV--SQ       | 2169 |
| FLEA       | 2025 | NIRLFLIIDNCQIVFRPYAHHILTPLELLV---DECAGSTINHVFADTVMLMSWHDVAIYPSSTS IQRNIA--SQ       | 2097 |
| STONYCORAL | 2172 | NIRLFIARLIIINEAKIFEAHAKFWFNPMLMELILQIkdEPAGTEGINFYIVDLVVTLLSWSTAIPEDSHNDRHLA--SR   | 2249 |
| LIMPET     | 2118 | NIKLFIARLIFNTSEVFPQYTKFWLRLPCLQIF---sGPLSSDGINYFNVDLIVMMMSWHTTSIPQDTEAERAMS--SR    | 2191 |
| HUMAN      | 2141 | NIRLFLAKLVINTEEVFRPYAKHWLSPLLQLAA---sENNGGEGIHYMVVEIVATILSWTGLATPTGVPKDEVLA--NR    | 2214 |
| STARFISH   | 2192 | NIKLFIARLIIINNEVFTPYARFWLGLLQLLI---sGNTGGEGIHYMVVDVVVLGLWVVAIPE---DKRLA--NR        | 2261 |
| SCORPION   | 2112 | NIKLFLTKLFINNAEIFKPYAVFLQPLINLIL---NATFGREINFYILDMVVLSSSIAPEDSS IGRHAA--SG         | 2184 |
| SHRIMP     | 2114 | NVKLFLLLVMNNARLIFEPYAAHFVSTILTCLV---DGTIGDKINFFCDVMVMVMGWSKAVPQDVTMGRNIV--GR       | 2186 |
| DANAUS     | 1476 | DVARVIAQAVCNVRGSLTSHAGSLAPPLLALVTDG-p-----VDQLYTDI FDTIIRWRAEINDKERLEAA-----       | 1539 |
| BOMBYX     | 1602 | HVAALLAQAVCNASDLDQHNCEILIPALLKVVTAV---EDGAAINGLQVDVLTISGWSGGGARREGADAA-----        | 1669 |
| AMEYLOIS   | 1608 | TNSCLLAQCICNCHNVLSQANLLRPAALYATST--pkVIGDRQVLLNHLVDILWTVIKWDIKVLPHYNSISL-----      | 1675 |
| ARCTIA     | 1599 | NAKWTLAQAI CNARTELKPHASVLTALLDVAQT---DGLGDRQVLLNHLVDILWTVIKWDIKVLPHYNSISL-----     | 1670 |
| PAPILIO    | 1600 | NAKWTLAQAI CNARTELKPHASVLTALLDVAQT---DGLGDRQVLLNHLVDILWTVIKWDIKVLPHYNSISL-----     | 1668 |
| PIERIS     | 1495 | PLRWLLAQAVCNVPSLI---DTRLRDDLLAVLDT-d-----KGLNAIQLYVLSVVKVPLDVARATGLVTA-----        | 1556 |
| PLUTELLA   | 1686 | NARWLFTQIINCCKDKLSSADSLTPQLLSMVATT--pyEHEGKLLNGLHVNTLKTITAYAVENMKMKDLTQQEIThLNT    | 1764 |
| CAPITELLA  | 2199 | LVKYIVQNC---YHQNRQIMRNNLEVLKT-----DIYENFID-REDKG--- -KRNV-VG-LQIVGVFLANGLSP        | 2257 |
| TERMITE    | 2170 | LLYLLISKV---HHRDRDVPKHNLLEIRTVVLEWPKPFDIPVQLLYDMIMKHDRK DPTVSEPG-IQVAAIILANKLEP    | 2243 |
| FLEA       | 1998 | FMYFLMKNA---YHERRAIYKLNMEI IKSVEIWKTCCLDFPLQYLY-LALENPVK D-SKTNMG-IELAGILANKIIP    | 2169 |
| STONYCORAL | 2250 | LLGFLLMSRT---RHRHRSFLRNNLEIVKSVVEIWKSLIHVPAEVIIF-NSFSDPDP VKKDNVAG-IQLLGVVANGFLFP  | 2322 |
| LIMPET     | 2192 | LVQFLMANI---YHKNKQIYRNNLEMLKTVLECWHDRIEIPYKIIY-NQLKS--- -BENKSVG-IQLLGVVITCKFPF    | 2260 |
| HUMAN      | 2215 | LLNFMKHV---FHPKRAVFRHNLEIKTLVLECWDCLSIYRILIF-EKFSKDP NSKDNSVG-IQLLGVMANDLPP        | 2287 |
| STARFISH   | 2262 | LLFELMHFC---HHSNRQVLRNNLEMIKTVECWKEIISVPTSVIY-RILATPDP DVKDSSTG-LQLLGVVANGFLFP     | 2334 |
| SCORPION   | 2185 | LLFELMSKC---FHIRKDVFRNNLEMIKTVVCQWKERLDIPTIYIF-ESMRNLDT KVKDNIVG-IQLFGIVVNSGLDP    | 2257 |
| SHRIMP     | 2187 | VLRYLCMMT---PQTRADIFKYNLDVVRSVVECWKSLTVPVYIYI-SLMEVKDG AEREVEAG-LQLLGVVANGFLFP     | 2259 |
| DANAUS     | 1540 | -VTSLVTLTtdRHADGRLTDRLIKLDD---IYGSKVTPVWKCLE-KYFADP-- [ 1]DNKL-PTC---LKIILNRINVIY  | 1604 |
| BOMBYX     | 1670 | -VRLVTRC1qHQRRRPLDADAVDCLDGLFRAHPGTITVRYDAFP-DYSA--- [ 4]DET--KLCmLRILQITTKHNIY    | 1742 |
| AMEYLOIS   | 1676 | -PKS1IDSLisQST---DCKDPLQLLDNFIEVYSQVPIVEWNVF---A--- [ 4]DRL--PRC-LPVIRRLKRIKIR     | 1741 |
| ARCTIA     | 1671 | CAKYL1STCieHRSQEGVRSLLNTLNNVLHYGSCMNDWDELQ-KHINEM--- -PKTAPYL-YPILQRLLKNGILI       | 1742 |
| PAPILIO    | 1669 | ILKKLVEVtiqNRRNKIVTILMQMNLILETF-EPLEIEWSCLY-ECVH--- [ 2]NBEAKIY-ISILKTLTK-KIYI     | 1739 |
| PIERIS     | 1557 | ---LVRTAveLESRSR--RLMLDTLDSWARAH-AGLVLPDSCYK-EYVADSGR ---KRWSC-MSVMRRVCSSGVRV      | 1621 |
| PLUTELLA   | 1765 | I1PLYHtcvYHKHRSYVFKALIQTFNEVLLKLYAEGVQWQIDFD-GYLKGMRR[ 6]DPTNEPAC-LELLTILSKNSVYI   | 1845 |

Supplementary Figure 8 Lepidoptera

|            |      |                                                                                   |                                      |         |
|------------|------|-----------------------------------------------------------------------------------|--------------------------------------|---------|
| CAPITELLA  | 2258 | WQPDAEVSKDRFYQYLAMNNQ--PDKQVYSAAEIVGMLSSSQ--NTESD                                 | KEWCRAVGDNIQKMLLGI [ 5 ] -DQFL       | 2332    |
| TERMITE    | 2244 | W---SSTGKLFQRLRLRNIDT-EKRSIFQSSAEVAGMALELLAANGSGML [ 4 ]                          | AEFLSGIVDKLNLTKDQS [ 1 ] -DKFL       | 2317    |
| FLEA       | 2170 | W---PDSKDDDYKALCMQFNS-MESITYKPCSEVIGMVLNLSLGS AENI                                | --LSSVNRRLDYLRNN [ 1 ] -DIFI         | 2237    |
| STONYCORAL | 2323 | VTSDSTIDEDRFYGTLVNNTF-KYKDVHAAAEVIGLLMMQLAKVKKIFD                                 | GPLHDMVGQKLLSLVNR [ 3 ] LDKFI        | 2398    |
| LIMPET     | 2261 | YGPDCPVDHRKFFTVAFMLCD-KSKPVYATAGEVVGMLIKYLEVKEQETE                                | GEFHTYIINNSSLQL-- [ 3 ] -DNFI        | 2333    |
| HUMAN      | 2288 | YDPQCGIQSSEYFQALVNNMSFvRYKEVYAAAEEVLGLILRYVMERKNILE                               | ESLCELVAQQLKQHQNTM [ 1 ] -DKFI       | 2361    |
| STARFISH   | 2335 | IDKASDIDBERFYAALSYNLKN-RYKMHAAAEVIGMAMKQKADVDKVTD                                 | GFLHSIVTSELTK-ISEI [ 2 ] -DVVF       | 2407    |
| SCORPION   | 2258 | YQNTSRIDKISYKLTLVNLTN-KYKIEYASAEVCGMSKMYFDPKDDVDY                                 | SEFCIKVTEISSLNAK-- -DQYL             | 2328    |
| SHRIMP     | 2260 | YTVDSLETKKRCESLVIRLLGA-HYASVYGAAAEVIGLILKYTSQKDGVSVE                              | A-LEDAVVKRVTELTVMK [ 1 ] -GQGL       | 2331    |
| DANAUS     | 1605 | PEVLPAVTR-----LA-----ARRVTLWPVYGRLLRLMKERGLDAR                                    | -HELECRAVLERLRSSD VSDYI              | 1663    |
| BOMBYX     | 1743 | ERLLPTVLA-----VLADARR--OHPVQK-LAELFGQTLAV-CDDETVAR                                | -ESLASYQRVLETYLTN VSDYV              | 1805    |
| AMELOIS    | 1742 | PELIPTLLK-----M--DLRI--WLEDVK--MAECFGAALTECERDGAIQ                                | -SFRDMLKRV-----KN SESYI              | 1797    |
| ARCTIA     | 1743 | PELLNKILA-----KF-EVND--WMKSSK-LPEVFGALASL----ETNKE                                | -EFLPKFWQILANVKSTK VTDYV             | 1801    |
| PAPILIO    | 1740 | RGLILELVK-----LLESKDT--QTIKQDIAPLFCARLKI---PANDRI                                 | -ENLNTFRKVLNKKYK--NN IKDYV           | 1800    |
| PIERIS     | 1622 | DGLVGGGLA-----LAVTAA--DMRTLRSIGATLGSALTA----DADE                                  | -VSDERVHKAMVAVRKQG [ 1 ] AGAYL       | 1682    |
| PLUTELLA   | 1846 | EQLAPAILK-----MMESKQI--LAKKLSNTATLLGLALAA--CHDSVTA                                | -VNLRLKVKLDRMRTGN [ 3 ] IQDYV        | 1912    |
| CAPITELLA  | 2333 | TCVHCIQKHFSAFVER-FIHKVLFLPLGYGVFRTYALEIIAAGIENI---EGAFVEIKNKNIIGILRERDELSQLMSLK   |                                      | 2408    |
| TERMITE    | 2318 | TCLFAVQYQYPRIVDA-FMNHVLFHLPKTYGPIFTMCLKIVYSRLEILG--DDTYAEMKSKNLFSLDRDPQONLALS     |                                      | 2394    |
| FLEA       | 2238 | ICLYGIKHYDPIAYP-YTYVYIFNISRAIDLQKTMILLQLLSVLELKG--EEFYSDIKTLDFDLKDKDT--VILLAK     |                                      | 2312    |
| STONYCORAL | 2399 | TCVHLKLNYPPIVDR-FVNQILFTLPSVHGDFKRSYCLELCSRVEHI---PNLFTELKGRGLKEMLSQRDDGIQIGVLR   |                                      | 2474    |
| LIMPET     | 2334 | YCIHKIHQQYPTADR--LNLKLLFMLPNLNGESRRLCLEVVHGRIGQI---DNVFMELKTKGLLSFLTQRNEKTQVVALN  |                                      | 2409    |
| HUMAN      | 2362 | VCLNKVTKSFPPLADR-FMNAVFLLPKFGHVKLTCLEVVLCRVEGM---TELYFQLKSKDFVQVMRHRDDERQKVCID    |                                      | 2437    |
| STARFISH   | 2408 | TCIHKLHFHYEPFADH-FTNKLLFMLPSLHGPKLQKCLVLSYISQR--PNIFLEMKSGKIVELLETHRDEGTQVLSL     |                                      | 2483    |
| SCORPION   | 2329 | TCLYKINHFPFIDSSFLNKLILYMLPNVHGIRKQLELINSHVENI---ENAFLEKNGQLLNMLEHRDESIQFSSLN      |                                      | 2405    |
| SHRIMP     | 2332 | TCIYNHKLHYSPFKVR-LINKLLNLLPKLYGIRHNKLECLIAHSATM---EDYHLHKEVDLILAKKEASTQLVALQ      |                                      | 2407    |
| DANAUS     | 1664 | KALFYQLRELDPVCDYKQFCVSDLVPKIPQREPRCLLSILSCYIKHGG---RGDFAVLDTIELEKMDITQ-----GVE    |                                      | 1735    |
| BOMBYX     | 1806 | LLLYYAQIGCPCRCSSFKSFKTVLSKASRLPKAEKLRCLRVIAKYLEHGPgnDDVIRDVVSTLNFEGLLGGDC--VKEALG |                                      | 1883    |
| AMELOIS    | 1798 | KLLYSQIGKGCEDVFNKQVTDQTRKLPKALQKCLVLSYISQR--tIDYKSMFETIESEFLTTDN--V-EALD          |                                      | 1872    |
| ARCTIA     | 1802 | RVLKYAQRADKCCNQRNRIITDLASKV---ERAGCLSIISVYLENCV-eESSCTEIFEIIGLKELLDGENKIIIEALK    |                                      | 1877    |
| PAPILIO    | 1801 | DIVLFARENADISDELPRSIKLLPKMVEESKTCLELISLTIKEKY--SDDVKSFLSKEVCKLVQEGD---SATLV       |                                      | 1875    |
| PIERIS     | 1683 | TLAASAAVYPALVNANNARIVDTMATKIIGRDKQKCLRILCAFAKNAKhsDEQIADIFDLVEPTVSLTCDP---LTIID   |                                      | 1758    |
| PLUTELLA   | 1913 | KVLFYVQNGYKCCNESNFRHITAPLAPKVMREKAKCFEILSTYLARTSsnTEYVTSMWQADICBSMVGEO--SNLAMK    |                                      | 1990    |
| CAPITELLA  | 2409 | IIRLLEKLEAS---QLLYLPAICEISDLSSVLCRREMYQILMWCYDNYK [ 1 ]                           | EAQSESRDEIITLTKDV LLRGL              | 2479    |
| TERMITE    | 2395 | IHKMVPHLKPE---QLEELVHEICKFETQRSVKCRSVMYELKWIYDHCQ                                 | ---DIGV-LIEBAKI LKGL                 | 2460    |
| FLEA       | 2313 | IHKLLPFLQND-lnRPSTLIQAKRLISSDTCNRSVVDIAMTSYKIIQ                                   | ---FKSDYDILQNVQYI LLLGL              | 2381    |
| STONYCORAL | 2475 | IHKMLKLTIP---ELKFIPLLTSPVSHNLLCRDLMYDFIWIYDSYR [ 4 ]                              | FQAEESADILADAKH LKQL                 | 2548    |
| LIMPET     | 2410 | IITSYREKLLSK---EMSLMDSITAFSHSPSTLCRKMVELLMIYDNYR [ 1 ]                            | DECTEGH-EIMLKTKEC LKGL               | 2479    |
| HUMAN      | 2438 | IYKMPKLPKV---ELRELLNPVVEFVSHSPSTACREQMYNLMWIHDNYR [ 3 ]                           | SETDNDSQEIFKAKDV LIQGL               | 2510    |
| STARFISH   | 2484 | LNVAMLPNLKPD---EILYLLPPVRTVFNLPSPACREVMYILMWIYDNYR [ 3 ]                          | SRTEDGADDILCAKDT LKQL                | 2556    |
| SCORPION   | 2406 | IQKLLKELDID---KMLNVFPIISKVHKS AETICRKMVYEMMHAYEKFN                                | TKNGIKEKEISRYAKEM LLHGL              | 2475    |
| SHRIMP     | 2408 | LNVAMPRLTPS---QLLYFMPGVAFASHPAPSCRETMYDLFVYVDFNS                                  | NNDTEDGHQLESQARGV LLRAV              | 2477    |
| DANAUS     | 1736 | LASTALHVMPS---LRQVLSAESAAGPA-----AVFPLVMRDFELQR                                   | --SS---EEPSIKRPAR [ 4 ]              | AHSTL   |
| BOMBYX     | 1884 | VRSLGQRYGN--teVLSAVMLAVKLCDBPAADVRAAGDVAKKAFKELC                                  | -E---DHEQSAPKRQRS [ 4 ]              | VLVRA   |
| AMELOIS    | 1873 | LVANGLFLMEN--g-FKRRIVQALEYCGHSAERVRKIAFVIAAKAFEELV                                | -NPLVNTNDCAPAKRP [ 4 ]               | LTDLA   |
| ARCTIA     | 1878 | VAHNGLKPMDS--e-MKKDILNAVSNCRNSSVSRKQAFVILKIFQDLV                                  | -IV---KTDHSAKRRAL [ 4 ]              | ILDTL   |
| PAPILIO    | 1876 | LVGRGLTRMGRLtiVGRGLVQSAKHCRSDVKVRDAAFVLSRAVECLF                                   | -TD---DLETPPKRSAR [ 4 ]              | LLQ--   |
| PIERIS     | 1759 | LCTAAVPTARQT---ARRRVITAEQLATPTT---LASPQLQRAAYLL [ 10 ]                            | EREKKEVEPAAKRRAG [ 5 ]               | ILSLW   |
| PLUTELLA   | 1991 | LVKSLHLMEE--r-MKRRTVMLAADFCSNIVVVRRLAFVMLRAFEDIQ                                  | --SS--EDQEPAAKRRKG [ 4 ]             | ILDLL   |
| CAPITELLA  | 2480 | SDDDLNRLTVQNFWSHETRL-PGETVERLV-AMLEAMYTPSTELHY                                    | LSVATNLLLEMTKSSDNRVLFDTPLSE          | 2553    |
| TERMITE    | 2461 | RDDPHLQDSIFEWYNSDAQDASTSDRL-LFLTDLVCPATEHIF                                       | LGSTQYLLMAGTTPYDQKIFKPELQK           | 2535    |
| FLEA       | 2382 | LDSDAQMNDKMQTFQWSENAL--PKTYDAIFKYLMSNLVDEHLEKNF                                   | IQGQVITLILALQNSDIQRNIFEHPLSE         | 2455    |
| STONYCORAL | 2549 | ADDDHDLQLKLNFWSDEARL-PGTTLERLV-EVLRALYSTTTEIQY                                    | LSMTNLLILHLTSLSPDYERLMPEOPLSE        | 2622    |
| LIMPET     | 2480 | GDEDMCRLLVQNFWSSDTRL-PTGTLDRMV-AMLEAMYSPTSEQY                                     | LSVATNLLLEMTKSSDYQREIFEHPLSE         | 2553    |
| HUMAN      | 2511 | IDENPGLQLIRNFWSHETRL-PSNTLDRLL-A-LNSLYSPKIEVHF                                    | LSVATNLLLEMTKSSDYQREIFEHPLSE         | 2583    |
| STARFISH   | 2557 | SDEEASHRLRVSNFWSHETRL-PTGTLERLV-AMLECMYSPGTEHQY                                   | LSVATNLLLEMTKSSDYQREIFEHPLSE         | 2630    |
| SCORPION   | 2476 | ADSDLTLLRLTVHNFWSQNNHL-PAETFSRIK-AVLQKMSPEIEHMF [ 39 ]                            | LSVATNLLLEMTKSSDYQREIFEHPLSE         | 2588    |
| SHRIMP     | 2478 | KEEDAALRQIVLNFVWLGQARS-MTLT-QCLL-HILRKMYSPESEDSF                                  | LQMAIVVLEAATRESDYQRNIFDQPLSE         | 2550    |
| DANAUS     | 1799 | QG-----LARGLAAG-----LRGL--RGLSS-DLALRL                                            | -----LARGLAAG-----LRGL--RGLSS-DLALRL | 1825    |
| BOMBYX     | 1955 | QGADRYTGSLLRGLGQGLTGD-----IQGL---STT-SFHARF                                       | -----IQGL---STT-SFHARF               | 1990    |
| AMELOIS    | 1946 | HENDAYALTVCARAAGVTSR-HSDVTAAGVGA---LAG-GAGERL                                     | -----LAG-GAGERL                      | AD 1988 |
| ARCTIA     | 1948 | -GSTGFHEIIVKEVSGVFDG-NEEIANMRDGVETCLSK-DMAVRF                                     | -----NEEIANMRDGVETCLSK-DMAVRF        | AE 1993 |
| PAPILIO    | 1947 | ---DEELKVALATLGMKLVSD-----DGLRDVAQSSCLPT-EVTTFR                                   | -----DGLRDVAQSSCLPT-EVTTFR           | CE 1985 |
| PIERIS     | 1839 | ---EDMAWRGVLRRTVVLDHT-DSNIVKGMALQVSLVSHVDHYTRL                                    | -----DSNIVKGMALQVSLVSHVDHYTRL        | SE 1884 |
| PLUTELLA   | 2062 | QVEDVYTLTVVAKLGGQLVDE-VVDISSMVGQGVVHLS--DMSVRI                                    | -----VVDISSMVGQGVVHLS--DMSVRI        | CE 2108 |
| CAPITELLA  | 2554 | CKFQDFAVSSWYQRHAM-TPMFLDTQSSC S--SQSNDSPDAGLST [ 2 ]                              | LRATQDAAQFTQCA-DG [ 2 ] KGPYNWLTSS   | 2626    |
| TERMITE    | 2536 | CQFEDFRMLLWRANATV-APMFADTLASQ [ 2 ] QGCLSGTGEHTGAGP [ 1 ]                         | LRATQASLAFQPTIEQSG [ 2 ] IGLSLSFSLSS | 2615    |
| FLEA       | 2456 | CTFKSYSDMNDWHIKNSAT-VPLFAESFIPK [ 2 ] SRSTAT-----                                 | -RSFOVYIGSQTIAAYFK [ 2 ] IAKIPMIQATC | 2523    |
| STONYCORAL | 2623 | CRFEEYQIDYSWQKRHLAM-TPLFAATGSSH [ 1 ] SGMTPGCSMSVDGSP [ 1 ]                       | LRATQNL-OFTFQD-- [ 3 ] STAFDNLNFTG   | 2698    |
| LIMPET     | 2554 | CRFQEFVSKSWKQRHAM-TPLFAATI-----STVSEMEGVEDSLDG [ 1 ]                              | VRATQDV-OFTFQD-- [ 2 ] NAFPNWLTGSS   | 2625    |
| HUMAN      | 2584 | CFEQYITDSDWRFRSTVL-TPMFVETGASQ [ 1 ] TLQTRTEGSLARWP [ 4 ]                         | IRATQQHDFTLTQADG RSSFDWLTGSS         | 2663    |
| STARFISH   | 2631 | CRFQDVTIDHSWKRHLAT-TPMFVETGASQ [ 1 ] SSGSQCSPDSSLSR [ 2 ]                         | IRATQDAHOFIATQQLDA [ 4 ] KNAYNWLTCG  | 2713    |
| SCORPION   | 2589 | CAFQNYISSSWKRHATL-TPWFVDSLSA [ 1 ] SPSDTSVKNIDE--- [ 1 ]                          | IRSTVDVREFDPTD--- [ 3 ] KKAFNWLTGSC  | 2661    |
| SHRIMP     | 2551 | CKFEREMKYSTANRRAHAM-IPMFAETGASN [ 5 ] SLLSYTQSGSDTNMETD [ 4 ]                     | VQATG-ANVFSATQCPGA ---TYNVTDST       | 2631    |
| DANAUS     | 1826 | CLLLSLVPL-----AD-----GLRVSLAA [ 1 ]                                               | ---VELFLQDIREQDT -----F              | 1860    |
| BOMBYX     | 1991 | FYLAIK--LPIHLSKTPP-----DVTSAVWN [ 1 ]                                             | ---TRMLFAAAKGQDG -----L              | 2030    |
| AMELOIS    | 1989 | CLALMLVKGATEIHACAP----- [ 1 ]                                                     | ---LELFFADLRSEK -----F               | 2021    |
| ARCTIA     | 1994 | LFYLIIFY---MARKDRK-----ELSHCGYI [ 1 ]                                             | ---LDLFLRDLKRDQD -----Y              | 2030    |
| PAPILIO    | 1986 | SPIISVYLPVVYGDCKSTN-----CLTALLY-                                                  | ---MFKDIRDTEA -----L                 | 2023    |
| PIERIS     | 1885 | IVLLCCT-----LESCGF-----                                                           | ---DV -----L                         | 1900    |
| PLUTELLA   | 2109 | CMILIALNQPVSVKPSVVAR-----ALTAAV--                                                 | ---RMNVQVLRDMEA -----F               | 2146    |





Supplementary Figure 8 Lepidoptera

|            |      |                                                               |                                                      |      |
|------------|------|---------------------------------------------------------------|------------------------------------------------------|------|
| CAPITELLA  | 2999 | HQEVYLPMLRSKIKLILNDtSQDNLLSFIEES---                           | LKTPVHKAFIEGSPFSEELALVCIHQELYDKAKHYANMSLQAFI         | 3075 |
| TERMITE    | 2959 | LQEKLLPQILLSEIQMMLDKG-VDSKREQFLQQVdwrLRRDRKSDYLSHSHYCEELA     | AIFLIQDKLDQAQHQVEHSLTMFL                             | 3037 |
| FLEA       | 2872 | AQEKLFPLITSEIHKAINSS-ENSEFSEFLSS---                           | wLSDSEKAAYLKTNFSEELSIFNIINGDIFGGGYLQEKLLMFL          | 2947 |
| STONYCORAL | 3081 | YQEHYLPHLITSKLLKQCGS-GDMTLENFVAKA---                          | MKTSERAALLRSYSDSLAMVYLQDNCDSASYAALSEQSFL             | 3156 |
| LIMPET     | 3004 | YQEHYLPYIIRSKLKLLELGG-DQQSLLTFVDTs---                         | MKTTYRAVLESRYSMELSLMYLWQDNYDRARHYANLALQKFL           | 3079 |
| HUMAN      | 3036 | YQETYPYMRISKLLKLLQGE-ADQSLTTFIDKA---                          | MHGELQKAILEHYSQELSLLYLLODDVDRAKYIYQNGIQSFM           | 3111 |
| STARFISH   | 3095 | YQELFLPHMMRSMKQLMEGG-EDETLLOPFDAS---                          | MSDADRFLFLEARYSEELSTLYTIQEDYDRAMFYLANCRQSF           | 3170 |
| SCORPION   | 3029 | YQENYLPFLIKSKLKLLEIENR-NDQSLTTFIDSA---                        | LKEENKKYLEENFSEELLLYI QENYDRAQYYSQCLQDFL             | 3104 |
| SHRIMP     | 3014 | PTATALPALVHSHKLMNILDGSeTDGNLIAFDQS---                         | MGDRHRSMLEGDLPQLQGLAAHQEKFPEQANVYANTATSMFL           | 3090 |
| DANAUS     | 2063 | TFRLCVDKY-----DFTDAFF-----                                    | WTRCL-----MGDRHRSMLEGDLPQLQGLAAHQEKFPEQANVYANTATSMFL | 2101 |
| BOMBYX     | 2262 | DLQRLQEQY---EIDS---DT-----                                    | WFDKM-----VSKYREODI-----HTYQVILKEL                   | 2300 |
| AMEYOLOIS  | 2245 | TFKIALNNSY---K-DSHIGES-----                                   | WFDKM-----VLSY-H-EE-----TRNSARWLSDV                  | 2284 |
| ARCTIA     | 2252 | QFKTYLGEYFEAKQKNIDYKL-----                                    | WFNKM-----AGSYVSSKLGKTILOFKQKWLKRM                   | 2301 |
| PAPILIO    | 2231 | NFRKQIDDW---KVTS---SNT-----                                   | WFDKI-----LLYQKSKN---TYKYVQWQNDV                     | 2271 |
| PIERIS     | 2062 | SFRREKESY-----TGEVVG-----                                     | WLHSM-----WSGLDADRDESG---LYRILLAA                    | 2100 |
| PLUTELLA   | 2384 | TFAAANFSS---E---ELPS-----                                     | WLNIM-----RLSLDHNNF---VEKQFEWTKQL                    | 2422 |
|            |      |                                                               |                                                      |      |
| CAPITELLA  | 3076 | QDWANLSTTRTSTRATKLOKLOEFTMGEQFLFSVIKTTSGEDFP--                | RQIDRTLHKWEARSPDRLLDSVVIWQNDIILNRNRY                 | 3153 |
| TERMITE    | 3038 | DSWAALNPSSNHLRTKQLDLOKTAELKACAFATNGEHSKQE--                   | LLAKELVKKRWKKNVPSA-FDSLLRWDIRAMYKKF                  | 3114 |
| FLEA       | 2948 | KDWSNLNPLSNELRLKMLMDIQKTESIQMFRMTTKKSDKIEYA--                 | ATVRKLIKKLWNMMAKP-SDSLLIWESEKLYRMLF                  | 3024 |
| STONYCORAL | 3157 | SDWAGLDSNLRSSRIKLOSLQKITEMQEFLEFIABEGNFSP--                   | MPVLSLLNKWYRSLRPHLPHIGVWDDIVTRNVL                    | 3234 |
| LIMPET     | 3080 | QWASSDTPFLIVASRTSLOLQTLQPLVLEHFEFLTYISNENDITH--               | TA-NQLLKSQWRKQPHKLLDPVNIWDDVISOQRY                   | 3156 |
| HUMAN      | 3112 | QNYSSIDVLLHQSRKFLKQSVQALTEIQEFTSFLSKQGNLSQ--                  | VPLKRLNLTWNRYPDAMDPMNIDDIITNRCFL                     | 3189 |
| STARFISH   | 3171 | HDWSGLPLMISRRRAKLQCIQRLETKQNFQLKLAIPDLQEAIGCQKSE              | LLDRWSGKDLDSKDPINIWDDVVSRLLY                         | 3250 |
| SCORPION   | 3105 | KWSSLNVLMPIIRKFKLQSLQKHIELOEQFLNNIDTYRINIDEY--                | HFKNLTDRWLKRYPD-I FDSVNIWDDIIMNRSLY                  | 3180 |
| SHRIMP     | 3091 | LTLQSYSVLTNPLLDQLNQVLLTSLSDCLNFKVAADRDFYS--                   | SKVKQVTVTSWKQKCRIDDNPL-MTQCLASYRDLY                  | 3167 |
| DANAUS     | 2102 | VRWPKRQF-----DVAAVLSGSQQEVTVQDDM-----                         | NDCLSKWAFRAMGSLC                                     | 2145 |
| BOMBYX     | 2301 | ARWPKRQF-----VLSCMAEATEWKCSEDNIDGLYSCV-----                   | R-IGSGDCLAEWAGRMLRRC---                              | 2351 |
| AMEYOLOIS  | 2285 | AKWPKRQF-----QESAVAALSSQLEEEP-----                            | WVC-----R-MSKRDCLEWESARLMLRA---                      | 2331 |
| ARCTIA     | 2302 | ERWPKRQF-----VVASVIEGKIPADDTL-----                            | MTC-----DIKASDCLAEWAARMLRSAY                         | 2350 |
| PAPILIO    | 2272 | CRWPKRQF-----AISATIDSFELKRMQDEHAQELE-----                     | CHIQSEDCLEWEAARIMTRSAC                               | 2325 |
| PIERIS     | 2101 | DRWPKRQF-----TFSAEI-----WKGDFEVQECNWLE-----                   | H--RDRVCLAQTAALMMRSLR                                | 2148 |
| PLUTELLA   | 2423 | DIWPKRQF-----DNSAITEATEWHSIVTTEGDNINKLP-----                  | RDIRPSDCLAKWAVRMLTRSLY                               | 2476 |
|            |      |                                                               |                                                      |      |
| CAPITELLA  | 3154 | MDHFAEHL[ 3 ]-DAKI-----DPFGKQRVMSLQAQVDAAALQGNH--             | S VARKLLKSAKDLVKVVDSEELSVLFTSHSA                     | 3223 |
| TERMITE    | 3115 | TRNIQDML[ 1 ]-----NTGASNALSRSTELANGVDSALYQENF--               | Y LARKYLRREAREKMSNS-GTDMELQCSLAYS                    | 3178 |
| FLEA       | 3025 | SNHIKQKL[ 9 ]-----INEELDNCKIKMELSFLDAAIKQKNL--                | GLSRIYIRKCLKDLGKHE-DPEKNYRWIRSRC                     | 3097 |
| STONYCORAL | 3235 | MSKFLQK[ 6 ]ERSGICLDDIKDFPFQKQVELKLCMANAAEQGNY--              | AVAHRCLKEALYKIPQG-NENLNISWSHTYA                      | 3313 |
| LIMPET     | 3157 | LQHSIQCL[ 3 ]-NKESEQMEDEGMFHQSLLKRLYLAIAESCEQNNI--            | ALTRLRILKKTNSASVSDNEELKVWESQLYA                      | 3232 |
| HUMAN      | 3190 | LSKIBEEFL[ 20 ]MEVQEQEEDISSLRSCSKMKNIDSARKQNNF--              | SLAMKLLK-ELHKESKT-RDDWLVSQWQSYC                      | 3281 |
| STARFISH   | 3251 | MDKLGSR[ 5 ]QQAGEEBETALEKIRLRLRLELWLEKMKADSAQQGNF--           | SVAQKHLK-ATHGSLSA-HEDLKPWTSYV                        | 3327 |
| SCORPION   | 3181 | MEKIVSKL[ 21 ]DSEPNYSYFSEKFLKEQRLLKMKL FVEAALLQGNL--          | Q VAVKHLKWSQQIAKELKADHWHWINCIHYC                     | 3275 |
| SHRIMP     | 3168 | LHLMEKLL-----PEDSLDVSNIKDITKNTFRTRVIRAAALHNSNY--              | HLANRHLK---KISSLSEDEYSKAQFYFMM                       | 3234 |
| DANAUS     | 2146 | -----SN SSKGSPSS-----QSGIATPND--                              | DKISLDMRHQEL                                         | 2195 |
| BOMBYX     | 2352 | -----AQGV AGGA-----GAABELRWAGGAARA-----                       | ALWGHVSACVERARGQLINDADVPKFLLLNL                      | 2404 |
| AMEYOLOIS  | 2332 | -----AQAN EREAMYPS-----SANELLWCVANEM-----                     | GLYRVLQCCDRNNIADLYDEKISWHHQKL                        | 2388 |
| ARCTIA     | 2351 | F-----DGD ERKSM-----CRGDELKWCSEANER-----                      | QLPKLALQCIERNKG-SLFPVNEALPWFYENV                     | 2405 |
| PAPILIO    | 2326 | IQKMYEDM EESCPISPSH-----SHALRWKARANEM-----                    | ALPLQVLSMCRMTIDECEL---STLPWRCEEL                     | 2384 |
| PIERIS     | 2149 | L-----QSS EHSSTQAASA---LHENMMRWCSL VNNIIRGAPENLrtALFGVD       | IRVCSQLEL-----ETIDNGLIEEL                            | 2211 |
| PLUTELLA   | 2477 | LSQLADSN DSEPVLQAYRARCRRSHELRWCEAAD-----                      | LSASVLSCLKRNAG-DLNESETLWLYQHI                        | 2540 |
|            |      |                                                               |                                                      |      |
| CAPITELLA  | 3224 | N-ANKRKCASGSEPSERLNLVVKRRLDKCESSTLKLNAALLCDQHLLQGEHLVMA-T     | ILQNQVKDIDALDQKL                                     | 3298 |
| TERMITE    | 3179 | K-AKWLQALKNITTEDEKLLKGLDSVSVTEQDQ---FEQYPLMAHETLQHVSVMAAGILQQ | LEQQPGVTLKLPAAE-                                     | 3249 |
| FLEA       | 3098 | Q-QIFLQGLEITDIDKKVQDCHRSWMDLIESLKEIDNLKYYPNYLIDVHVS           | IVDVTKLFKHL                                          | 3173 |
| STONYCORAL | 3314 | E-VHRKQITLTVAGAVETALVAGQ-LDKFSAKMLIEIPELRGIQHHLRSKTFDILCA     | MLDGGVVIAT-LESQA                                     | 3387 |
| LIMPET     | 3233 | S-THKKIISNDWSEGDINGLLT---IGKFNDSKVLKSKPDLRHRHVLTA             | TATSYELLAES                                          | 3303 |
| HUMAN      | 3282 | R-LSHCRSRSQGCSEQVTLVTKTVSL-LDENNVSSYLSKNILAFRDNILG            | TYRIIANA                                             | 3356 |
| STARFISH   | 3328 | Q-MNQKILITIELKQVMTLLTFDP-LAKLSNTPALTDGICLRRHHTLSKSY           | DLVAIA                                               | 3402 |
| SCORPION   | 3276 | K-IDLKKAKNQYEPQLDTLCAHQ-LAKLDLHFFPKLDVBS-TMNHYLQSEI           | EIEMAADI                                             | 3341 |
| SHRIMP     | 3235 | A-ETHILRGQCKQDRLKYLVEAWAKYLGVRSSMSILDQNPVREIQYLK              | LESHELCLEICRA                                        | 3310 |
| DANAUS     | 2196 | L-ALRGMALQSNDRQALENILELERTESMIQSGSEHSGY-----                  | -----DMLRVYE                                         | 2238 |
| BOMBYX     | 2405 | K-MKREMAT---GASGKLEDELTKAERHAPVVL-----                        | ---EHASDEEFGYINE                                     | 2446 |
| AMEYOLOIS  | 2389 | L-SLKGMALERNDSLLREALDASVSLTSDLQ-----                          | ---EITPDA---IGYK                                     | 2430 |
| ARCTIA     | 2406 | R-ARRLVALRENDTSKLQKALQATEREDKQVS-----                         | ---FGLKH                                             | 2441 |
| PAPILIO    | 2385 | L-ARRQLALNRNTEELIQIRDMAVCYSNDLLVENKTTTEAMVIELKPGT             | SQENIDCNIKL[ 6 ]LLNNTPVKSILGLNY                      | 2466 |
| PIERIS     | 2212 | VAKRGLAIIHRNSPTLEAETLEFAQEKSRGLSERSKEP-----                   | -----LRLMQ                                           | 2254 |
| PLUTELLA   | 2541 | A-ALRTAGLSKNCADTLTKALAKAQGLSEFA-----                          | ---DKTTPDVIVAMNR                                     | 2584 |
|            |      |                                                               |                                                      |      |
| CAPITELLA  | 3299 | L-EKITESVSPALSHQE[ 2 ]ASLHEAAYNSFKSGV-----                    | VAASQPESVC-----VNKAYMSLVHFCQVLRQRENDE                | 3366 |
| TERMITE    | 3250 | -VKKLADRIGAPDCSQDPT[ 2 ]QNLKQYGLSSLKTAEEV-----                | TPRGNSE-----QAVAKAYLVQYKACRAHSNTSREDN                | 3318 |
| FLEA       | 3174 | FILKHGQRGELSHS---KTLDFIFGKCLKQSKIKYAE--AAHANNDINI             | EISTVTCNCKYKMIQF-NMHNLYAEED                          | 3242 |
| STONYCORAL | 3388 | K-NALVKLCRIDETESQK[ 3 ]SDLMTRSFSVLSQSAIKAAK--NAEGK            | CNTT---QTSCTVDAAMIAMVNFCDNLRKKEVSV                   | 3462 |
| LIMPET     | 3304 | C-DKLNKLLKTDNLDKTQ[ 4 ]SDLLQKSHQELKSAISDSV--VTRS              | RSSESFT---EADAQIALSKFCDKFLRMKENE                     | 3376 |
| HUMAN      | 3357 | R--RILELSGSSEDESEK[ 2 ]AGLYQRAFQHLSEAVQAAE--EAAQ              | PPSWSCgPAAGVIDAYMTLADFCDQLRKEENA                     | 3431 |
| STARFISH   | 3403 | KLDKLLGLVGNATRPEQ[ 2 ]STLYSKAYSLETLQAVSLAD--KDD               | AVTSQS--ERSMT--EAYMALVSFCDRMLRLEKSE                  | 3476 |
| SCORPION   | 3342 | -EKIQELTDFTSIQSKS[ 3 ]IDLFCNKYEVKRAIDIIQ--EVEQ                | KMIEFD---QATIGETYFKFANYCNKILRMQE                     | 3415 |
| SHRIMP     | 3311 | VLSKFKFENANGKESWQRE---LLSCSYKSLQLVANCAEgkLVK                  | SDALNQDdSKKSDSdHALALVYKCEECVIKWKDHW                  | 3385 |
| DANAUS     | 2239 | LTLRLRDLNSVVERVNV-----AIVKVMGVDRn-----                        | VENDV-TRNLDTLCLLGTICLETMFMENSTDI                     | 2300 |
| BOMBYX     | 2447 | MLLRIRSDLGTMMQASMD-----AVLTQVDRRLQ---RGG                      | AVSPDS--RRALDSMTEMFYVYNHlwTES--DDE                   | 2510 |
| AMEYOLOIS  | 2431 | QIFLLQQHLELTAASVNL-----GLEKVTNRPD---QDS                       | SILN--S-KSTLTLYELALVHYDRQWSD--D                      | 2491 |
| ARCTIA     | 2442 | LTLQLRDLGLVNSKSLD-----EMLLSNLNIETED--HSS                      | FYSNKN-GVDLITLYEFAMHDHYDELWELS--DTST                 | 2506 |
| PAPILIO    | 2467 | IINIQKDLNDLSAEKIK-----FLLNDSRDLRkt---SE                       | SSVVGEN-KKVLHNMVIMAVTHYDENWPM                        | 2531 |
| PIERIS     | 2255 | LILKLADTNVGNRALVE-----EAMTKRQTLTa-----                        | KD-ESETRPILATVAQHLFCLFERTDVED                        | 2313 |
| PLUTELLA   | 2585 | MTLNLLNDLESLTQKTE-----AIIQDIDRQdSI                            | LKDSGHSNK-MKNMESAYEIALHYNDNWEHCID                    | 2652 |





Supplementary Figure 8 Lepidoptera

|            |      |                                                                                                                                            |      |
|------------|------|--------------------------------------------------------------------------------------------------------------------------------------------|------|
| CAPITELLA  | 3759 | KNSCTLKDF--LRQGCSDVSWEQIQN-kNLPNNPANLLCQWIGDS[11]KCYQKYSrNETLNAFKKREAMV <b>PWDL</b> LRKSY                                                  | 3842 |
| TERMITE    | 3727 | GAHMKYSP-----EETSA-----EFRK-----                                                                                                           | 3758 |
| FLEA       | 3587 | PXTKTLRDMmFLKEPGIKNRVEEVRS-----SYNKWIRQASKT[10]NAVVHYHrDAVISKYQELVNR <b>IPEDI</b> LKDSF                                                    | 3665 |
| STONYCORAL | 3851 | NNTKPLKGV--LNSAMTKAENDHYIG-pNGAGACYRNWIDKF-KG[10]EMFKKANrTETERSFTQKQALV <b>PWDL</b> LRRAF                                                  | 3932 |
| LIMPET     | 3762 | NNTPLKDF--VYGALTEQERKYILG-qGGPGKQHENWYKYFDA[10]KVYQNYsrAETIKDFRMKENKV <b>PWDL</b> FRRAF                                                    | 3844 |
| HUMAN      | 3807 | ENTVTLKDL--LLNTMSQEKAAYLSdpRAPPCEYKDWLTKM--[10]LMYKGANrTETVTSFRKRESKV <b>PADL</b> LKRAF                                                    | 3887 |
| STARFISH   | 3872 | QNTTLKEF--LHLAMTEQEGNAYNS--HGPRYQHSSEWVKYAG[10]JAVYRHANyTDTVKCFRSWEAL <b>PWDL</b> MRRAF                                                    | 3954 |
| SCORPION   | 3793 | DNTNVLGSF--LKDAMTDEKESFRE--SDPKMTFYKFLSKTNS[10]NIYKIAD--TEVNKKFTecINMI <b>PWDL</b> FRRAF                                                   | 3873 |
| SHRIMP     | 3764 | DSTQPLKDF--INDSYRENETKCYGE-----ARALYGNENY                                                                                                  | 3829 |
| DANAUS     | 2589 | ENNTRLRDM-----V-----DTGGDA--GVTRTADENLLLNVPQA                                                                                              | 2642 |
| BOMBYX     | 2806 | EGHHSIRSL-----AAKSCDLNGLV--S--RPLDADLAEPPSR                                                                                                | 2862 |
| AMYELOIS   | 2767 | EDHETLFLSL-----INSVCDLDEISM--SVPRPADDELIVSPTPH                                                                                             | 2822 |
| ARCTIA     | 2804 | ENYQLQEF-----MG-----DKVRI--PVVRLDNDKLVLSPLA                                                                                                | 2856 |
| PAPILIO    | 2831 | EDHVRVRL-----IANKYDIKIGIES--TL-----GEKLIQDTRH                                                                                              | 2885 |
| PIERIS     | 2587 | EDHERLDAL-----ASN-----TL-----SALALREAM                                                                                                     | 2608 |
| PLUTELLA   | 2964 | EDHVTVRSM-----VSKYKLNLEITA--SVRRPPDELILASAAA                                                                                               | 3022 |
| CAPITELLA  | 3843 | QKLASSPESYFVLRGNCATSHALNCISAYIMCIGDRHLSNHMVDLI                                                                                             | 3915 |
| TERMITE    | 3759 | QRLSVSPESYFILRQSFACSYAVLCIAHMLLIGIDRRHLSNVLVSK                                                                                             | 3831 |
| FLEA       | 3666 | KMSANAEAFPTLRHNFATSYGTMCIAHMLLIGIDRRHLSNCLININ                                                                                             | 3738 |
| STONYCORAL | 3933 | LQLAVSPEAFFILRSHFASSHACLICQVILGIDRRHLSNVLVDM                                                                                               | 4005 |
| LIMPET     | 3845 | HQMSTSPFAFVLRCELVTHATISICQVILGIDRRHLSNFMNLK                                                                                                | 3917 |
| HUMAN      | 3888 | VRMSTSPFAFVLRSHFASSHALICISHWMLLIGIDRRHLSNFMVAME                                                                                            | 3960 |
| STARFISH   | 3955 | IQLSASPEFLLMKRRNFARSHAVICQVILGIDRRHLSNFLISLK                                                                                               | 4027 |
| SCORPION   | 3874 | LKFSSTLEAFVILRYNFITSHAVLCISQVILGIDRRHLSNVLVST                                                                                              | 3946 |
| SHRIMP     | 3830 | VRMSSSTEGFFSLRSFAFVSYAALCISQVILGIDRRHLSNVLVSK                                                                                              | 3902 |
| DANAUS     | 2643 | ESGCTLEEFIRKKTAFTESLGHMTAFSICGLSDRHLONILYDPV                                                                                               | 2707 |
| BOMBYX     | 2863 | QELCCTSEDFIRRRKRFQDSLATITIFNVIIDVDRHLENFLVEAS                                                                                              | 2931 |
| AMYELOIS   | 2823 | ERNSSCFEDFLMKRRNFQDSLATMAISDMLLIGIDRRHLSNVLWSAR                                                                                            | 2888 |
| ARCTIA     | 2857 | ENKCSSELEEFIAKRRMFLDLSMTMTITNVLGVDGDRHLONIMINKQ                                                                                            | 2924 |
| PAPILIO    | 2886 | ELNSSLPEFIMKQNYVESLAAMTYATSLGLLDRHLSNVLVSVQ[14]CGCVLAVDWN                                                                                  | 2967 |
| PIERIS     | 2609 | RKRSAQAHFLEQQRRFTEVAASVTLTALLGVGDRHONLLVSVQ                                                                                                | 2677 |
| PLUTELLA   | 3023 | EDDSCSLQDFLQKRRNFAETLGSNAIHAMLLIGIDRRHLSNMYDRA                                                                                             | 3099 |
| CAPITELLA  | 3916 | FRMTRQLRNLLPLREKGVIEGTMVHSLRALRQHKHQLISTMDVFIKEPSLDWQNAAKKEIQAMSNR-----[12]WFP                                                             | 3997 |
| TERMITE    | 3832 | FRLTPHIVSLLQLPEETGLFRETMIHCLTRLNMYDMLLATMEVFVQEPSIDWLE-----FASRHESLNKK[7]WYP                                                               | 3907 |
| FLEA       | 3739 | IRLTPHIMNLMPEPTAAFGILPRVMVHALTRLDARSVLYATMNIHFHEPLINWLEPIKMYGVRSEDEALNYT[11]TMA                                                            | 3825 |
| STONYCORAL | 4006 | FRLTQQFVNLMLPLKKSGLTQSVMHHTLRALRSNDHLLNTMDVFIQEPSLDWQVYARKQAKTQG-----INE-[6]WYP                                                            | 4082 |
| LIMPET     | 3918 | FRLTQIINLTLPLGLKGLLENTMHTTRALRQDYDLLNTMDVFIQEPSVDWLNFAEKQRNEMLMT-----[7]WYP                                                                | 3994 |
| HUMAN      | 3961 | FRLTQFVNLMLPKMTGLMYSIMVHALRFRSDPGLLNTMDVFIQEPSFDWKNFEQKMLKGGGSW---IQ-[8]WYP                                                                | 4040 |
| STARFISH   | 4028 | FRLTQIIVNLMLPFKKEGILQSSMVHTLRALRQNHLLNTMDVFIKEPSLDWKTNASQAKQKADAGRVL--[13]WYP                                                              | 4115 |
| SCORPION   | 3947 | FRLTQYVNLMLPLKEKGVIEATMISALSALRDNADILLNTMDIFIKEPTVNWQENALQKRIIGKVDENVD[22]WYP                                                              | 4044 |
| SHRIMP     | 3903 | FRLSPIVNVFQPIGQVGLMKEIMVSAALGALQESRHLVTAVLEAFVKEPTKDWLDFVQKQEGDTQDSK--VEL                                                                  | 3975 |
| DANAUS     | 2708 | ARLTRNLLAVC---RDTVLEARLQRLSRRLREYQGIILPARNISLK-----RSGH-----L                                                                              | 2755 |
| BOMBYX     | 2932 | ARLTRNMLAMC---DPIALEARLQRTALQRLRSRETFYLFATARLLYA-----RAPACQ                                                                                | 2980 |
| AMYELOIS   | 2889 | ARLTPCLLALG---DAQVLESRLQRLSELRECOYLFQCNFVMSFL-----W---DKQNI                                                                                | 2938 |
| ARCTIA     | 2925 | ARLTANLLAVC---DVKVLESRLQRLMLCLRQSRRLYFAFVRSFY-----W---KGRDF                                                                                | 2973 |
| PAPILIO    | 2968 | ARLTRCLLAPC---NLQVLENRLQKLTSETRSHRLLSTLQLSYK-----WM---GNEIQ                                                                                | 3017 |
| PIERIS     | 2678 | ARLTRNMIAFA---NPLESLIMEWSEVIREYAPPELLAILRVVYR-----LDP-----SQL                                                                              | 2726 |
| PLUTELLA   | 3100 | ARLTVLVAL---AGLESRLQSVLASLRDLSHLLPSIKVLFK-----WMPEYESNEFQ                                                                                  | 3151 |
| CAPITELLA  | 3998 | KEKVNIVRQKLEGNPSHVMRAELALGQ--LGS--YLFYFVIVLMGDKQAD-IRARLPADGLSSEEQVAALLNLA <b>TD</b> DPNI                                                  | 4072 |
| TERMITE    | 3908 | QOKLDAKRLKLEGANPVITTELEKAGFKDsk---YLAKFLEC---VKGHNsVRSQMPSYQLPEEQVDSLLDQ <b>AD</b> DPNI                                                    | 3981 |
| FLEA       | 3826 | HKLRLMARLKLQGSNPVHILQDELKHSFvSTIneiVVNHYIEKGMGVBQHN-IRRRIKMKDLTAKEQVDC <b>LD</b> ADDPNI                                                    | 3904 |
| STONYCORAL | 4083 | KQKVQSAWRKLEGNFPAVYMRDLDLQGH--SKQS-WYKQMESVCLGDRNAN-VRAREPESGLSVESQV <b>SL</b> LDADDPNI                                                    | 4158 |
| LIMPET     | 3995 | KQKLYALRKFKGDNPCHITKDELVLGH--SRSP-AIKHFECVGLGDAKDN-VRATLPTGT <b>LT</b> VEQV <b>AL</b> LDADDPNI                                             | 4070 |
| HUMAN      | 4041 | RQKICYAKRKLAGANPAVITCDELLLGH--EKAP-AFRDYVAVARGSKDHN-IRAQEPESGL <b>SE</b> ET <b>QV</b> CLMD <b>Q</b> ADDPNI                                 | 4116 |
| STARFISH   | 4116 | REKVNFAKRLKLEGANPSDITQRELALGH--SRNP-AFSAIKEVVKGDQRSN-IRASSPKSGL <b>SV</b> ET <b>QV</b> CE <b>LD</b> ADDPNI                                 | 4191 |
| SCORPION   | 4045 | KQRIELFAKRLKLEGNPCYITKEELRLGH--SNKP-IFQRLTDVCLGDRK-S-LRQNLPKNGL <b>SV</b> KQ <b>QV</b> KS <b>LD</b> Q <b>AD</b> DPNI                       | 4119 |
| SHRIMP     | 3976 | SKRIELNLDKLSINPAYITLWAVSQNFVAKQK-AYENLKQAVLLGDRGES-VRASVGERGL <b>SH</b> Q <b>QV</b> DI <b>LL</b> Q <b>AD</b> DPNI                          | 4053 |
| DANAUS     | 2756 | -DKLPAIRGKIQRLLQHQVTKIEWIQRS-EVKYK---EKYLELLDIF-G---TDDKCS <b>TV</b> EE <b>QV</b> SN <b>LL</b> Q <b>SD</b> DPRI                            | 2824 |
| BOMBYX     | 2981 | -PQLSHVKAILGKVTADIRVEANPDP-DLDRL---RALLV---QVFPG---RPATDT <b>SV</b> KD <b>QV</b> QV <b>LL</b> R <b>H</b> C <b>TD</b> PRV                   | 3047 |
| AMYELOIS   | 2939 | -ERLPHIQALLSGRCLSRDVT <b>R</b> ALLENs-RVYTK---HAYLTLIDVFKD---FERKEQ <b>TV</b> VE <b>QV</b> IS <b>CF</b> LV <b>H</b> C <b>TD</b> PRV        | 3008 |
| ARCTIA     | 2974 | -SEIKHVRNLLQGSMTSYQVTRDVIENS-KIKHK---QEYLNILDVAVFN---FTCKQT <b>SV</b> EE <b>QV</b> SC <b>LL</b> Q <b>H</b> C <b>TD</b> PKI                 | 3043 |
| PAPILIO    | 3018 | -EKLENVYLLQCKKLSHQVSVRNQKSF-----GDYELLNHFIDK---FASEKV <b>TV</b> KQ <b>QV</b> T <b>N</b> LL <b>H</b> C <b>TD</b> PKI                        | 3082 |
| PIERIS     | 2727 | -YKLEMMQQLVRCQVSHQLSLQQLQHQ--QKRY---ASLELVLDLFDQ---FPDKET <b>SV</b> Q <b>QV</b> SS <b>LL</b> LS <b>TD</b> PRV                              | 2795 |
| PLUTELLA   | 3152 | -KKMQYIENILKGRKLSYQVTEVLDKTIKMKHA---DKYIALL <b>TE</b> IF <b>D</b> ---VPLKET <b>AV</b> EE <b>QV</b> TC <b>LL</b> R <b>H</b> C <b>TD</b> PRV | 3222 |
| CAPITELLA  | 4073 | LGRIFAG <b>EP</b> V <b>V</b>                                                                                                               | 4084 |
| TERMITE    | 3982 | LKGTWQG <b>EP</b> W <b>M</b>                                                                                                               | 3993 |
| FLEA       | 3905 | LGCTWHG <b>DP</b> N <b>M</b>                                                                                                               | 3916 |
| STONYCORAL | 4159 | LGRWQ <b>EP</b> N <b>V</b>                                                                                                                 | 4170 |
| LIMPET     | 4071 | LGRVWQ <b>EA</b> V <b>V</b>                                                                                                                | 4082 |
| HUMAN      | 4117 | LGRWEG <b>EP</b> W <b>M</b>                                                                                                                | 4128 |
| STARFISH   | 4192 | LGRVYAG <b>EA</b> W <b>M</b>                                                                                                               | 4203 |
| SCORPION   | 4120 | LSRIYFG <b>DP</b> W <b>F</b>                                                                                                               | 4131 |
| SHRIMP     | 4054 | LGRSNIG <b>DP</b> F <b>L</b>                                                                                                               | 4065 |
| DANAUS     | 2825 | LSVTRSG <b>EP</b> W <b>I</b>                                                                                                               | 2836 |
| BOMBYX     | 3048 | LGATRAG <b>EP</b> W <b>L</b>                                                                                                               | 3059 |
| AMYELOIS   | 3009 | LQVTRAG <b>MP</b> W <b>V</b>                                                                                                               | 3020 |
| ARCTIA     | 3044 | LSITPQG <b>EA</b> N <b>I</b>                                                                                                               | 3055 |
| PAPILIO    | 3083 | LAITRSA <b>EP</b> N <b>I</b>                                                                                                               | 3094 |
| PIERIS     | 2796 | LAFTRPT <b>QP</b> N <b>M</b>                                                                                                               | 2807 |
| PLUTELLA   | 3223 | LSVTRTG <b>EP</b> W <b>L</b>                                                                                                               | 3234 |
