# Supplementary material for: Uncovering DNA-PKcs ancient phylogeny, unique sequence motifs and insights for human disease
Source: PubMed Central journal article supplement — Prog Biophys Mol Biol. Author manuscript; Available in PMC 2022 Aug 1. (PMC8021618; doi:10.1016/j.pbiomolbio.2020.09.010), 2020-10-06
Supplement: NIHMS1638735-supplement-10.pdf [file NIHMS1638735-supplement-10.pdf]

**Supplementary Figure 9.**

**Clustal Omega sequence alignment of DNA-PKcs from selected metazoan plus putative archaeon sequences.**

Panel A: Percent identity of sequences from Clustal Omega. Common names or alternative names are shown in (). See Supplementary Table 1 for full list of organisms, scientific names and accession numbers.

| <b>Sequence</b>            | <b>% Identity</b> |
|----------------------------|-------------------|
| <b>HUMAN</b>               | <b>100</b>        |
| MOUSE                      | <b>79.3</b>       |
| TASDEVIL (TASMANIAN DEVIL) | <b>76.76</b>      |
| PLATYPUS                   | <b>75.02</b>      |
| TURTLE                     | <b>71.88</b>      |
| ALLIGATOR                  | <b>70.21</b>      |
| OSTRICH                    | <b>69.71</b>      |
| GECKO                      | <b>68.56</b>      |
| CANARY                     | <b>67.87</b>      |
| CAECIL (AMPHIBIAN)         | <b>67.78</b>      |
| SNAKE                      | <b>66.5</b>       |
| LATIMERIA (COELACANTH)     | <b>65.32</b>      |
| STERLET (FISH)             | <b>64.8</b>       |
| XENOPUS                    | <b>64.31</b>      |
| BAMBOO (BAMBOO SHARK)      | <b>62.27</b>      |
| MILII (ELEPHANT SHARK)     | <b>62.14</b>      |
| GAR (FISH)                 | <b>61.77</b>      |

Supplementary Figure 9: Clustal Omega: DNA-PKcs alignment metazoan plus "putative archaeon"

|                            |              |
|----------------------------|--------------|
| DANIO (FISH)               | <b>58.42</b> |
| BELCHER (LANCELET)         | <b>43.4</b>  |
| HEMICHOR (HEMICHORDATE)    | <b>42.68</b> |
| STARFISH                   | <b>42.66</b> |
| NEMATOSTELLA (SEA ANEMONE) | <b>41.94</b> |
| PISTILLATA (STONY CORAL)   | <b>41.19</b> |
| STRONG (SEA URCHIN)        | <b>41.07</b> |
| SOFT CORAL                 | <b>39.91</b> |
| POMACEA (SNAIL)            | <b>39.44</b> |
| CRASSO2 (OYSTER)           | <b>39.43</b> |
| PRIAPULA (WORM)            | <b>39.18</b> |
| TRICHOPLAX (PLACAZOA)      | <b>39.01</b> |
| CAPITELLA (WORM)           | <b>37.29</b> |
| SPONGE                     | <b>35.34</b> |
| SCORPION                   | <b>34.27</b> |
| MUDCRAB                    | <b>29.72</b> |
| <b>"PUTATIVE ARCHAEON"</b> | <b>21.58</b> |

**Panel B: Clustal Omega alignment of DNA-PKcs sequences from selected metazoans compared to putative archaeon.**

Sequences of selected Metazoans as in Supplementary Figure 2. Sequence names and classification are described in Supplementary Table 2. Colours representing identical, conserved and semi-conserved amino acids, phosphorylation sites and catalytic amino acids are as in Supplementary Figure 2. The putative archaeon sequence accession numbers and the amino acid numbers of the corresponding start and end of each putative archaeon sequences on the human DNA-PKcs sequence is indicated below and in bold/black on the alignment in the following pages.

| Archaeon Accession number | Corresponding residue number in human sequence (start) | Corresponding residue number in human sequence (end) |
|---------------------------|--------------------------------------------------------|------------------------------------------------------|
| <b>RYG70452.1</b>         | <b>1</b>                                               | <b>291</b>                                           |
| <b>RYG70451.1</b>         | <b>292</b>                                             | <b>1187</b>                                          |
| <b>RYG70450.1</b>         | <b>1188</b>                                            | <b>3274</b>                                          |
| <b>RYG70459.1</b>         | <b>3275</b>                                            | <b>4128</b>                                          |

Supplementary Figure 9: Clustal Omega: DNA-PKcs alignment metazoan plus "putative archaeon"

**CLUSTAL O(1.2.4) multiple sequence alignment**

|              | <b>Start RYG70452.1 (Archaeon)</b>                            |           |
|--------------|---------------------------------------------------------------|-----------|
| ARCHAEON     | -----MEALEKLLLEDLNRVETEDA---AVNVASLVASVEA                     | 33        |
| MUDCRAB      | -----MASGGREDVQDLEKLLHHYSSGN-ELRNARSARDIVVDISE                | 40        |
| SCORPION     | -----MNEITNSLHENILKLNDFIKYQK--DEGHSSIIYVIKDISE                | 38        |
| SPONGE       | -----MESRIESLWESLHSSS-PQRYSYATEVASDLYS                        | 32        |
| CAPITELLA    | -----MARALQEQLAGLVSDTRGQPGVNNARISHESIGNIGA                    | 37        |
| DANIO        | -----MAADTSTVGGIQGYLLKLLHSSLEDTVSTNVAIVCHDIIGDLGQ             | 43        |
| MILII        | -----MAGPRGAAADTLSAFASKLHLLSLSDVKSAAAESHSAVGSISR              | 43        |
| BAMBOO       | -----MADGMRRHGAGVGLVERRLQOLEQLLSAQDSRSAAVESHIVANLTH           | 48        |
| XENOPUS      | MLLAGAGGSSGDGDGQDVASGPAESAAGILGRLHQLHGLLSLE-SGVGAEGAHSLLHNLAE | 59        |
| STERLET      | -----MAQPGSCSVGAGGIQGNLHKLHSLFNATDAKSAAVESHNLIGNLGQ           | 46        |
| GAR          | -----MAGSGGGIQGYLQKLLHSLCGAGETKQTALECHSVIGDLGQ                | 40        |
| LATIMERIA    | -----MAEEGGSPSAVEGVSGYLLKIHSSLTVTDTKSAIEISNIFGNLRQ            | 46        |
| CAECIL       | -----MSVPGVGGDSAVGVQGSLLRRLHASLSSKDPGLEAPVAQSLIRSLGE          | 46        |
| SNAKE        | -----MASSL-VVP---GGGLQGFLQLHLDALRSSDASSAALRGCSSLIRSVAE        | 44        |
| CANARY       | -----MAGVQQCLLQLHRCLQPGDAGGSALHGYSLLRSLAE                     | 36        |
| OSTRICH      | -----MCS-----ERKDVQA                                          | 10        |
| GECKO        | -----MAISLPVA---GGGLQGLLLQLHGTLPDPASAALHGHSIRSMAE             | 44        |
| TURTLE       | -----MAAALPVGG---GGGIQGSLLHQLSCALQDPDGTAAALRGYHLIRGVGE        | 45        |
| ALLIGATOR    | -----MAALV                                                    | 5         |
| PLATYPUS     | -----MAGSVPGPQGSLLRLQRFLEAEDAGVSAVAAYQLIRGLGQ                 | 40        |
| TASDEVIL     | -----MSGAGGGGLQGSLLQLQELLSGGDPGSAALAAYHLIRAVGQ                | 41        |
| <b>HUMAN</b> | -----MAGSGAGVRCSSLRLQETLSAADRCGAALAGHQLIRGLGQ                 | <b>40</b> |
| MOUSE        | -----MAEEGTGVRWLLQLQEFLSAADRCSAAGASYQLIRSLGQ                  | 40        |
| CRASSO2      | -----MAASLLEDNLRSLNECLTTAD-NSSKEQADSIVADISQ                   | 37        |
| POMACEA      | -----MAATLEETLRLSLHDQ---SG-ASAYNLANGLIADIRQ                   | 33        |
| TRICHOPLAX   | -----MASNLSQLLIDLHALLNLQS-LHRGSNACDIASDITV                    | 36        |
| NEMATOSTELLA | -----MTDAISSRLLQLNELVAEES-PLRGQESAEIARDLRA                    | 36        |
| PRIAPULA     | -----MARTVRIEDHVQTLLESPLSDDREADPETAHSAVADLAH                  | 39        |
| SOFTCORAL    | -----MTEVIDRYLNQLNSCLKTLSSSRG-REAADICRDLRL                    | 36        |
| PISTILLATA   | -----MSDLLNRYLTHLHSL-PSLDAPHCGLDASNTVVVDLGS                   | 36        |
| HEMICHOR     | -----MPSELQSKLAELLELLDETPSQHTVEKCNNLIGEIQ                     | 38        |
| BELCHER      | -----MAGSGSLEARLSELHALLAESDHGHGAVEAHNLVADIAQ                  | 39        |
| STRONG       | -----MAAAELQRHLAELHEVIDSGGTAHGPEAQLVVDIAQ                     | 38        |
| STARFISH     | -----MATADLPVKLSELNGLISTKSGLHVAEKAQDLVVDLGH                   | 38        |

Supplementary Figure 9: Clustal Omega: DNA-PKcs alignment metazoan plus “putative archaeon”

|              |                                                                                                                                                               | <b>RYG70452.1</b> |
|--------------|---------------------------------------------------------------------------------------------------------------------------------------------------------------|-------------------|
| ARCHAEON     | IGSGDL-DELD-LDTCT <b>ALLL</b> APGQTASGLPGDSIKRSS <b>SSLMQ</b> FLTASLRMKD-----                                                                                 | 85                |
| MUDCRAB      | HLTKDL-SPVQ-YDLFL <b>SHV</b> FG-----E <b>KGI</b> I <b>AF</b> GTRVTKEQA-----                                                                                   | 76                |
| SCORPION     | ICLRGTLSEKD-RSYVC <b>SLIL</b> R-----K <b>EDG</b> FL <b>H</b> FL <b>EEAV</b> NT <b>PS</b> -----                                                                | 76                |
| SPONGE       | LCVEQI-TESE-LAYSS <b>SVL</b> FN-----P <b>DNG</b> IL <b>K</b> FL <b>H</b> DVTT <b>LEE</b> -----                                                                | 69                |
| CAPITELLA    | ICLNDV-NASD-VDLAY <b>SVIF</b> N-----H <b>ETG</b> L <b>I</b> <b>K</b> FL <b>K</b> K <b>I</b> Q <b>N</b> DE-----                                                | 74                |
| DANIO        | ECMITK-NENE-LVLQT <b>SLLF</b> A-----K <b>EEG</b> LL <b>S</b> FL <b>RR</b> SL <b>ST</b> E <b>K</b> L <b>G</b> TT <b>G</b> V                                    | 86                |
| MILII        | DFRCSSSSDSQ-LALQS <b>SMV</b> FS-----K <b>DTG</b> LL <b>V</b> FL <b>R</b> K <b>S</b> L <b>R</b> F <b>EE</b> -----                                              | 81                |
| BAMBOO       | DLNH-NTHESR-LALHS <b>SLV</b> FS-----K <b>DEG</b> LL <b>I</b> FL <b>R</b> K <b>S</b> L <b>S</b> N <b>EE</b> -----                                              | 85                |
| XENOPUS      | ECLV <b>S</b> ALGSSA-LDLNT <b>SLIF</b> S-----K <b>EFG</b> LL <b>A</b> FL <b>V</b> R <b>K</b> S <b>L</b> SS <b>DE</b> -----                                    | 97                |
| STERLET      | ECM <b>V</b> SK-NENE-LVLQT <b>SLIF</b> S-----K <b>ENGL</b> L <b>A</b> FL <b>V</b> R <b>K</b> SL <b>N</b> IED-----                                             | 83                |
| GAR          | ECL <b>V</b> VR-NENE-LVLRS <b>SLIF</b> S-----K <b>EDG</b> LL <b>S</b> FL <b>R</b> K <b>S</b> L <b>S</b> SE <b>D</b> -----                                     | 77                |
| LATIMERIA    | ECL <b>V</b> TS-DENE-LALHI <b>SLIF</b> S-----K <b>EIG</b> LL <b>I</b> FL <b>R</b> K <b>S</b> L <b>S</b> SE <b>E</b> -----                                     | 83                |
| CAECIL       | EC <b>V</b> TSS-GDSV-LALQT <b>SLIF</b> S-----K <b>EHG</b> LL <b>A</b> FL <b>I</b> H <b>K</b> SL <b>G</b> IE <b>E</b> -----                                    | 83                |
| SNAKE        | SC <b>V</b> TSS-GDDI-LALQI <b>SLV</b> FS-----K <b>ENGL</b> LL <b>S</b> FL <b>I</b> Y <b>K</b> S <b>L</b> SV <b>ED</b> -----                                   | 81                |
| CANARY       | TCLASL-ASGE-QALHL <b>SLV</b> FS-----Q <b>EYGL</b> LL <b>V</b> FL <b>I</b> H <b>R</b> SL <b>T</b> IE <b>E</b> -----                                            | 73                |
| OSTRICH      | DC <b>V</b> F---ALP-AALHI <b>SLV</b> FS-----Q <b>EYGL</b> LL <b>V</b> FL <b>I</b> H <b>K</b> SL <b>G</b> IE <b>E</b> -----                                    | 44                |
| GECKO        | TC <b>V</b> TSS-GDVA-RALQT <b>SLV</b> FS-----K <b>EDG</b> LL <b>A</b> FL <b>I</b> H <b>K</b> SL <b>S</b> T <b>EE</b> -----                                    | 81                |
| TURTLE       | AC <b>V</b> TST-GDGA-RALQT <b>SLV</b> FS-----K <b>DNG</b> LL <b>V</b> FL <b>V</b> R <b>K</b> S <b>L</b> SM <b>EE</b> -----                                    | 82                |
| ALLIGATOR    | P <b>V</b> VIRT-GDSA-QALQS <b>SLV</b> FS-----K <b>DQGL</b> LL <b>V</b> FL <b>I</b> R <b>K</b> S <b>L</b> S <b>I</b> EE-----                                   | 42                |
| PLATYPUS     | EC <b>V</b> LSA-GPAV-QALHT <b>SLV</b> FS-----K <b>EFG</b> LP <b>V</b> FL <b>I</b> R <b>K</b> SL <b>D</b> IE <b>E</b> -----                                    | 77                |
| TASDEVIL     | EG <b>V</b> LCT-SPAV-LALQT <b>SLIF</b> S-----K <b>EFG</b> LL <b>V</b> FL <b>I</b> RES <b>L</b> S <b>I</b> EE-----                                             | 78                |
| <b>HUMAN</b> | <b>ECV</b> LSS-SPAV-LALQT <b>SLV</b> FS-----R <b>DFG</b> LL <b>V</b> FL <b>V</b> R <b>K</b> SL <b>N</b> S <b>I</b> E-----                                     | <b>77</b>         |
| MOUSE        | EC <b>V</b> LST-SSAV-QALQI <b>SLV</b> FS-----R <b>DFG</b> LL <b>V</b> FL <b>I</b> R <b>K</b> S <b>L</b> S <b>I</b> ED-----                                    | 77                |
| CRASSO2      | IC <b>I</b> NES-TDKD-IDLCC <b>SVL</b> FD-----K <b>RKG</b> LV <b>S</b> FL <b>S</b> ET <b>V</b> T <b>K</b> EE-----                                              | 74                |
| POMACEA      | IC <b>L</b> HEI-SEKD-RDYCC <b>SAL</b> FD-----K <b>DIG</b> I <b>I</b> AF <b>L</b> Q <b>V</b> A <b>A</b> K <b>D</b> E-----                                      | 70                |
| TRICHOPLAX   | L <b>C</b> LQTA-SDAE-KAYCS <b>SAL</b> FG-----Q <b>DYGV</b> V <b>T</b> FL <b>R</b> K <b>S</b> IG <b>L</b> DD-----                                              | 73                |
| NEMATOSTELLA | H <b>C</b> SQ <b>L</b> R-DESELGARC <b>S</b> IL <b>FD</b> -----D <b>KTG</b> I <b>I</b> RF <b>L</b> H <b>K</b> T <b>I</b> A <b>N</b> Q <b>E</b> -----           | 74                |
| PRIAPULA     | K <b>C</b> LQDI-SKRD-VDLT <b>CSV</b> LF <b>S</b> -----E <b>D</b> R <b>G</b> V <b>L</b> I <b>F</b> L <b>R</b> R <b>A</b> I <b>P</b> L <b>D</b> E-----          | 76                |
| SOFTCORAL    | Y <b>C</b> IENI-NETQ-LAYCS <b>SLLF</b> N-----Q <b>DDG</b> L <b>I</b> T <b>F</b> V <b>K</b> AV <b>V</b> Q <b>L</b> D <b>E</b> -----                            | 73                |
| PISTILLATA   | F <b>C</b> LE <b>N</b> V-SSSE-QAYYS <b>SLLF</b> S-----G <b>ET</b> S <b>I</b> V <b>S</b> FL <b>R</b> K <b>V</b> I <b>T</b> L <b>D</b> E-----                   | 73                |
| HEMICHOR     | IC <b>L</b> R <b>T</b> T-SENE-LAY <b>HC</b> SV <b>V</b> F <b>H</b> -----K <b>ETG</b> IL <b>L</b> FL <b>K</b> K <b>T</b> I <b>T</b> I <b>D</b> Q-----          | 75                |
| BELCHER      | IC <b>L</b> R <b>H</b> T-AERD-VAYCC <b>SVL</b> F <b>Q</b> -----E <b>STG</b> I <b>T</b> A <b>F</b> L <b>R</b> K <b>T</b> V <b>T</b> L <b>D</b> Q-----          | 76                |
| STRONG       | L <b>C</b> L <b>N</b> Q <b>T</b> -RENE-LAFCR <b>S</b> EL <b>F</b> Q-----K <b>ETG</b> I <b>I</b> T <b>F</b> L <b>Q</b> K <b>A</b> V <b>S</b> K <b>D</b> E----- | 75                |
| STARFISH     | L <b>C</b> L <b>R</b> Q <b>L</b> -SENE-LAYCC <b>SQ</b> L <b>FN</b> -----K <b>DNG</b> I <b>L</b> V <b>FL</b> N <b>K</b> A <b>I</b> P <b>K</b> D <b>E</b> ----- | 75                |

: : : . . \*

Supplementary Figure 9: Clustal Omega: DNA-PKcs alignment metazoan plus “putative archaeon”

|              |                                                                                                          | <b>RYG70452.1</b> |
|--------------|----------------------------------------------------------------------------------------------------------|-------------------|
| ARCHAEON     | RDIVRAKVHAVKFLAVYVKQIKYVM----IYAEKLAIDL IQLFKMEDSSEVKAALLLPV                                             | 141               |
| MUDCRAB      | --FVDVRNSTLDLIIITL LMKDTKKII----KYVGDITNYTLFLYNADKSTKVCAHALEAF                                           | 130               |
| SCORPION     | --LKDSLIEALQFLNLF LINIGNKVV----QYGITV KDVVFSIFLRNQLAKVKILALSAL                                           | 130               |
| SPONGE       | --FASCKEELKLLSNFVKNL SRRVL----SHIVPITDVCVFIFMREKSAKVKNATLNLL                                             | 123               |
| CAPITELLA    | --FEGCKCEI LELLKTFISKFP GKVH----PYAVDVKDAQLQLITRDRRARVKNNATPLL                                           | 128               |
| DANIO        | EILRETRVEIMNFLGAF LQRMSATV R GWEKNYAVELKDT C I V V Y T K D K S A K C R N P A L D L L                     | 146               |
| MILII        | --FRDSREDV LKLLSEVVERIGEAVG----RYACDIKGT CVVVYTK EKA A K C K A A A L D L L                               | 135               |
| BAMBOO       | --FRDCREEV LKLLITAFVEKIKETV G----PYALDIKDVCLVIYTK EKA A K C K V A A L D L L                              | 139               |
| XENOPUS      | --FKDCREEA LKFLYTFLEKIGSNVQ----PYAMDIKTL CVIVYTK DRAA K C K I P S L E L L                                | 151               |
| STERLET      | --FRDTREEA LKLLTTF L D R I A H K V N G W E K N Y A C D I K D T C L V V Y T K D R A A K C K V S A L E L L | 141               |
| GAR          | --FRDVREEV LKLLSTFLQRITQSVK G W E R N Y A V D I K E T C L V V Y T K D K A A K C R V P A L S L L          | 135               |
| LATIMERIA    | --FRDNREEI LKFLTAFVEKIGQKLN----PYACNVKLILFPVFFF----FIFIFTY                                               | 132               |
| CAECIL       | --FRDCREET LKFLCIFLEKIGQKVQ----PYACDIKNT CVVVYTK EKA A K C K V P A L E L L                               | 137               |
| SNAKE        | --FRECREEA LKFLILAFVEKIGPKIQ----PYADV K R I C V T A Y T K D R S A K C G I P A L E L L                    | 135               |
| CANARY       | --FRDCREEA LKFLCVFMEKVGDKIH----PYACNIKQTCLSVYIKERTAKCKISALELL                                            | 127               |
| ONSTRICH     | --FRDCREEA LKFLCAFLEKIGEKVH----PYACNVKQTCISVYTKERA A K C K I P A L E L L                                 | 98                |
| GECKO        | --FRECREEI LKFLCAFLEKIGEKIH----LYAHDV K R T C I V Y T K D K S A K C R I P A L E L L                      | 135               |
| TURTLE       | --FRECREEA LKFLCAFLEKIGQQVH----PYAHDIKQTCISVYTK EKA A K C K I P A L E L L                                | 136               |
| ALLIGATOR    | --FRDCREEA LKFLCTFLEKIGQGVH----PYACDIKQTCISVYTKDKMAKCKIPALELL                                            | 96                |
| PLATYPUS     | --FRDCREEA LKFLCIFLEKIGQKIE----PYSYDIKSV C I S V Y S K D R A A K C K I P A L E L L                       | 131               |
| TASDEVIL     | --FRDCREEA LKFLCIFLEKIGQKIE----PYSLGIKSVCTSVYTKDKAAKCKIPALELL                                            | 132               |
| <b>HUMAN</b> | <b>--FRECREEI LKFLCIFLEKMGQKIA----PYSVEIKNTCTSVYTKDRAAKCKIPALDLL</b>                                     | <b>131</b>        |
| MOUSE        | --FRDCREEA LKFLCVFLEKIDQKVM----HYSLDIKNTCTSVYTKDRTAKCKIPALDLL                                            | 131               |
| CRASSO2      | --FQTKQKILEFLSEFVQRIGKKII----PYVFDIKDVCVSLFFRERLAKIKNLSVPVL                                              | 128               |
| POMACEA      | --FQSTKTNL LDFLIGDFLQKVGKLL----PYAIDIKEACVSAF SRDKYAKVKNSALGVL                                           | 124               |
| TRICHOPLAX   | --LDKCKEDL LKLLITAYMEKIGGKIS----PYAVQIKDVCISLFTRDKAARVKNATFPPL                                           | 127               |
| NEMATOSTELLA | --FVECKTEL LKFLQSYLGQLNTRVN----PYAVAIKD I C M K L L F Q E S S K V K I E T F L P L                        | 128               |
| PRIAPULA     | --FKLAKKEL LQLLHSFINKGQTRIL----TYAVDIKDTCLAVFSRDRQADVKNATFPPL                                            | 130               |
| SOFTCORAL    | --FAKCKEVI LSFLAEYIAKVKTRIS----PYATDIKDI CLKLFTKDKNARVKNETFEVL                                           | 127               |
| PISTILLATA   | --FQDAKIEL LKFLQSYVMKMGKIN----PYVVEIKDI CLKIFSQDHSNKAKAETLPLM                                            | 127               |
| HEMICHOR     | --YVSSKERI LEFVYNFMIRADKKIV----TYALDIKDVCLSLFTRDKMAKIKNRTFPIL                                            | 129               |
| BELCHER      | --YLPKAVET LSFL LAFLEKIGRKIQ----PHAVEVKEVCM AVFSRDRLSRVKCATFPVL                                          | 130               |
| STRONG       | --YGGSKVQT LEFLLGFVQKAKELVL----DHAKDIKDVCM SLYTRDKLAKVKAKTFPLV                                           | 129               |
| STARFISH     | --LKGSKEQL LEFLHAFLLKAGSRL----ARTVEIKKICISAFMRDKSAKVKTTFPVL                                              | 129               |

.:.: : . :

Supplementary Figure 9: Clustal Omega: DNA-PKcs alignment metazoan plus “putative archaeon”

|              |                                                             | <b>RYG70452.1</b> |
|--------------|-------------------------------------------------------------|-------------------|
| ARCHAEON     | KNILRPRIYSVEAIDAVAKLDDADDEVDYDDCVPFDLDTFPLQSIYQVLVEEVRLNK-K | 200               |
| MUDCRAB      | CLLLEKFSHSVSV-----Q-DINLHQLIEG---ICIQTQRY                   | 162               |
| SCORPION     | IKVLELCGSAISS-----E-QFNLQKIVNKIIEYLAQASSK                   | 165               |
| SPONGE       | INTLELCGKTEYS-----H-DLDIPKIADKFFQAALLPT-K                   | 157               |
| CAPITELLA    | IELLKQTSGLPVA-----G-DLQVEGMIERLFKELIKSP-K                   | 162               |
| DANIO        | IKILYLTKDSSIT-----Q-NLRIGDMFNKIFYGELCQKH-K                  | 180               |
| MILII        | ITLLHSKLSSSCL-----Q-QFKIGELFNKIFYGELSQKS-K                  | 169               |
| BAMBOO       | LVLHLSK---VCL-----Q-EFKIGDMFNKIFYGELAQKS-K                  | 170               |
| XENOPUS      | IKLLQLLKNSSII-----E-EFKIGEIFNKIFYGELATKS-K                  | 185               |
| STERLET      | IKLLHITS-PCLL-----Q-EFKVGD MFNKIFYGDLAQKS-K                 | 174               |
| GAR          | IQLLHGTKSSGVA-----Q-DFRVGD MFNKIFYGELSQKS-R                 | 169               |
| LATIMERIA    | LQLLQSTKSPHCI-----E-EFKVSEMFNKIFYGELAQRS-K                  | 166               |
| CAECIL       | IKVLQILKNSYEI-----E-ELKVKEIFNKIFYSELGVKS-K                  | 171               |
| SNAKE        | IKLLQKLQSSYAM-----V-DMKVGEIFNKIFYGEIAIKS-K                  | 169               |
| CANARY       | IKLLHTLQRSCLM-----E-EMKVGEIFNKIFYEELAARS-R                  | 161               |
| OSTRICH      | IKLLQNLRRSCLM-----E-EMKVGEIFNKIFYGELATRS-K                  | 132               |
| GECKO        | IKLLQNVRSACVM-----E-DMKVGEIFNKIFYGELAVKS-K                  | 169               |
| TURTLE       | IKLLQNLRRSSFLM-----E-ELKVGEIFNKIFYGELAARS-K                 | 170               |
| ALLIGATOR    | IKLLQNVQCSSLM-----G-ELKVGEIFNKIFYGELAGKS-R                  | 130               |
| PLATYPUS     | IKLLQTLRSSRLM-----E-ELKVGGI FNKIFYEELALKT-K                 | 165               |
| TASDEVIL     | IELLKTLRSSRYM-----E-EFQLGELFSKIFYGELALKT-K                  | 166               |
| <b>HUMAN</b> | <b>IKLLQTFRSSRLM-----D-EFKIGELFSKIFYGELALKK-K</b>           | <b>165</b>        |
| MOUSE        | IKLLQILRSTRM-----D-EFKIGELFNKIFYGELASKS-K                   | 165               |
| CRASSO2      | AKVLELSVGSVNV-----Q-DLGIDKMINKFFMELTKSVSK                   | 163               |
| POMACEA      | VKVLLELTVGSPIR-----E-EMKIDNLVEKLFRELTKTS-K                  | 158               |
| TRICHOPLAX   | LQLLSSKLHSSVV-----E-ELAISKLVDKYMSACKOPT-K                   | 161               |
| NEMATOSTELLA | IQLMQTKLESSII-----D-EMDIPKLI DRYFKACLQSS-K                  | 162               |
| PRIAPULA     | IKVLQLCRGSQTQ-----A-KLDVPKLI DRYFNELTQSS-R                  | 164               |
| SOFTCORAL    | LQLFELKFEPTIV-----E-KLDVKNIVEKYFSACSQST-K                   | 161               |
| PISTILLATA   | AEILDVKLESSVV-----E-KLDVPKI FDKYFGACIQPV-K                  | 161               |
| HEMICHOR     | NKLLLELTANTPVA-----K-ELGVSKLIDKYFSQLMQPS-K                  | 163               |
| BELCHER      | KKVLQLTIHSQLG-----D-ELRVSDMVDRMFLELTMKS-Q                   | 164               |
| STRONG       | IELLKLTSGTRMD-----DEAMGVDAMLKFFGELGQPS-K                    | 164               |
| STARFISH     | IELLQRSASAQME-----A-DLDIPKMIELYFEQLMQPS-K                   | 163               |
|              | :                                                           | : : : .           |

Supplementary Figure 9: Clustal Omega: DNA-PKcs alignment metazoan plus "putative archaeon"

|              |                                                                                                                                                                                                                                                          | <b>RYG70452.1</b> |
|--------------|----------------------------------------------------------------------------------------------------------------------------------------------------------------------------------------------------------------------------------------------------------|-------------------|
| ARCHAEON     | LTGK <b>V</b> HREALAT <b>L</b> GILVAVY <b>P</b> AAAF <b>T</b> VSVIDI <b>I</b> LSL <b>C</b> DEAL <b>K</b> -----NAF <b>N</b> SRG <b>K</b> -DP <b>D</b>                                                                                                     | 253               |
| MUDCRAB      | KGST <b>I</b> LHHQ <b>L</b> R <b>T</b> L <b>G</b> VLAKVY <b>P</b> ENV <b>R</b> C--HSAM <b>I</b> L <b>K</b> IY <b>K</b> DH <b>I</b> A-----RHM <b>G</b> Q----K <b>T</b> D                                                                                  | 210               |
| SCORPION     | ITPT <b>V</b> KQ <b>Q</b> AY <b>L</b> L <b>G</b> ISSRH <b>Y</b> PDC <b>M</b> Q <b>L</b> --CSER <b>L</b> LN <b>W</b> Y <b>L</b> KD <b>L</b> K-----FHT <b>T</b> SN--Q <b>K</b> S <b>E</b>                                                                  | 215               |
| SPONGE       | HSAT <b>I</b> RGG <b>I</b> Y <b>H</b> LL <b>G</b> VLCEW <b>F</b> PEHL <b>V</b> K--ISS <b>R</b> L <b>I</b> DI <b>Y</b> MS <b>N</b> L <b>K</b> -----SE <b>M</b> TV <b>K</b> KT <b>K</b> PE                                                                 | 209               |
| CAPITELLA    | PAAS <b>V</b> KAH <b>I</b> F <b>H</b> LL <b>G</b> VIAEL <b>F</b> PE <b>K</b> M <b>V</b> R--GSD <b>K</b> LL <b>N</b> LY <b>M</b> TT <b>L</b> K-----QE <b>I</b> ES <b>K</b> TH-EP <b>E</b>                                                                 | 213               |
| DANIO        | IPDT <b>V</b> LGC <b>I</b> Y <b>E</b> LL <b>G</b> VLGEV <b>H</b> PSEM <b>V</b> N--NSD <b>K</b> LY <b>K</b> AY <b>L</b> GE <b>L</b> K-----GQ <b>M</b> T <b>S</b> TT <b>K</b> -EP <b>K</b>                                                                 | 231               |
| MILII        | FPDT <b>V</b> LE <b>K</b> VY <b>E</b> LL <b>G</b> VLAEV <b>Q</b> PTE <b>M</b> L <b>H</b> --NSE <b>K</b> LF <b>C</b> AY <b>L</b> N <b>E</b> L <b>R</b> -----VQ <b>M</b> T <b>S</b> AT <b>R</b> -EP <b>K</b>                                               | 220               |
| BAMBOO       | LPDT <b>V</b> LE <b>K</b> VY <b>E</b> LL <b>G</b> VLAEV <b>Q</b> PTE <b>M</b> L <b>D</b> --NSE <b>K</b> LY <b>R</b> AY <b>L</b> N <b>E</b> L <b>K</b> -----IQ <b>M</b> T <b>S</b> AT <b>R</b> -Q <b>P</b> K                                              | 221               |
| XENOPUS      | LSDT <b>V</b> LE <b>K</b> VY <b>E</b> LL <b>G</b> ILGEV <b>Q</b> PCE <b>M</b> T <b>Y</b> --NSE <b>K</b> LF <b>K</b> AF <b>L</b> GE <b>L</b> K-----AQ <b>M</b> NS <b>S</b> TR-N <b>P</b> K                                                                | 236               |
| STERLET      | IPDT <b>V</b> LE <b>K</b> IY <b>E</b> LL <b>G</b> VLGEV <b>Q</b> PS <b>D</b> ML <b>N</b> --NSE <b>K</b> LY <b>R</b> AY <b>L</b> SE <b>L</b> K-----SQ <b>M</b> T <b>S</b> AT <b>R</b> -EP <b>K</b>                                                        | 225               |
| GAR          | IPDT <b>V</b> LGN <b>I</b> Y <b>E</b> LL <b>G</b> VLAEV <b>Q</b> PS <b>D</b> MT <b>D</b> --NSE <b>K</b> LY <b>R</b> AY <b>L</b> GE <b>L</b> K-----SQ <b>M</b> T <b>S</b> TT <b>R</b> -EP <b>K</b>                                                        | 220               |
| LATIMERIA    | LPDT <b>V</b> LE <b>K</b> VY <b>E</b> LL <b>G</b> VLGEV <b>Q</b> PSE <b>M</b> L <b>H</b> --NSE <b>K</b> LF <b>R</b> AF <b>L</b> GE <b>L</b> K-----TQ <b>M</b> R <b>S</b> TT <b>K</b> -EP <b>K</b>                                                        | 217               |
| CAECIL       | VPDT <b>V</b> LE <b>K</b> VY <b>E</b> LL <b>G</b> VLGEV <b>Q</b> PS <b>D</b> ML <b>D</b> --NSE <b>K</b> LF <b>R</b> AY <b>L</b> GE <b>L</b> K-----KQ <b>M</b> T <b>S</b> TT <b>R</b> -EP <b>K</b>                                                        | 222               |
| SNAKE        | VPDT <b>V</b> LE <b>K</b> IY <b>E</b> LL <b>G</b> VLGEV <b>Q</b> PSE <b>M</b> ID--NSE <b>K</b> LF <b>R</b> AY <b>L</b> LE <b>L</b> K-----VQ <b>M</b> T <b>S</b> AT <b>R</b> -Q <b>T</b> K                                                                | 220               |
| CANARY       | IPDT <b>V</b> LE <b>K</b> IY <b>E</b> LL <b>G</b> VLGEV <b>Q</b> PS <b>D</b> MI <b>N</b> --NSE <b>K</b> LF <b>R</b> AY <b>L</b> RE <b>L</b> K-----TQ <b>M</b> T <b>S</b> AT <b>R</b> -G <b>P</b> K                                                       | 212               |
| OSTRICH      | VPDT <b>V</b> LE <b>K</b> IY <b>E</b> LL <b>G</b> VLGEV <b>Q</b> PS <b>D</b> MI <b>N</b> --NSE <b>K</b> LF <b>R</b> AY <b>L</b> GE <b>L</b> K-----TQ <b>M</b> T <b>S</b> TT <b>R</b> -V <b>P</b> K                                                       | 183               |
| GECKO        | VPDT <b>V</b> LE <b>R</b> IY <b>E</b> LL <b>G</b> VLGEV <b>Q</b> PS <b>D</b> ML <b>E</b> --NSE <b>K</b> LF <b>R</b> AY <b>L</b> GE <b>L</b> K-----TQ <b>M</b> T <b>S</b> STR-EP <b>K</b>                                                                 | 220               |
| TURTLE       | VPDT <b>V</b> LE <b>K</b> LY <b>E</b> LL <b>G</b> VLGEV <b>Q</b> PS <b>D</b> M <b>V</b> D--NSE <b>K</b> LF <b>R</b> AF <b>L</b> GE <b>L</b> K-----TQ <b>M</b> T <b>S</b> AT <b>R</b> -EP <b>K</b>                                                        | 221               |
| ALLIGATOR    | VPDT <b>V</b> LE <b>K</b> IY <b>E</b> LL <b>G</b> VLGEV <b>Q</b> PS <b>D</b> ML <b>D</b> --NSE <b>K</b> LF <b>R</b> AY <b>L</b> GE <b>L</b> K-----TQ <b>M</b> T <b>S</b> AT <b>R</b> -EP <b>K</b>                                                        | 181               |
| PLATYPUS     | ITDT <b>V</b> LE <b>K</b> IY <b>E</b> LL <b>G</b> VLGEV <b>H</b> PSE <b>M</b> LC--NSE <b>K</b> LF <b>R</b> AY <b>L</b> GE <b>L</b> K-----MQ <b>M</b> T <b>S</b> STR-EP <b>K</b>                                                                          | 216               |
| TASDEVIL     | IADT <b>V</b> LE <b>K</b> IY <b>E</b> LL <b>G</b> VLGEV <b>H</b> PS <b>V</b> M <b>V</b> H--NSE <b>K</b> LF <b>R</b> AF <b>L</b> GE <b>L</b> K-----TQ <b>M</b> T <b>S</b> TT <b>R</b> -EP <b>K</b>                                                        | 217               |
| <b>HUMAN</b> | <b>IPDT<b>V</b>LE<b>K</b>VY<b>E</b>LL<b>G</b>LLGEV<b>H</b>PSE<b>M</b>IN--NA<b>E</b>N<b>L</b>F<b>R</b>AF<b>L</b>GE<b>L</b>K-----TQ<b>M</b>T<b>S</b>AV<b>R</b>-EP<b>K</b></b>                                                                              | <b>216</b>        |
| MOUSE        | LPDT <b>V</b> LE <b>K</b> VY <b>E</b> LL <b>G</b> VLGEV <b>H</b> PSE <b>M</b> IN--H <b>S</b> E <b>N</b> LF <b>R</b> AF <b>L</b> GE <b>L</b> K-----TQ <b>M</b> T <b>S</b> TV <b>R</b> -EP <b>K</b>                                                        | 216               |
| CRASSO2      | LPAS <b>V</b> KE <b>S</b> IY <b>V</b> IL <b>G</b> LLAE <b>I</b> Y <b>P</b> EH <b>M</b> T <b>Q</b> --YAG <b>K</b> L <b>V</b> DI <b>Y</b> LR <b>A</b> L <b>K</b> -----A <b>E</b> M <b>T</b> S <b>K</b> T <b>K</b> -K <b>P</b> E                            | 214               |
| POMACEA      | LVPT <b>V</b> KG <b>N</b> IY <b>F</b> LL <b>G</b> VIAEV <b>Y</b> PED <b>I</b> T <b>Q</b> --D <b>S</b> DR <b>L</b> V <b>G</b> LY <b>V</b> S <b>A</b> L <b>K</b> -----A <b>E</b> M <b>T</b> S <b>K</b> T <b>K</b> -K <b>P</b> E                            | 209               |
| TRICHOPLAX   | YSST <b>V</b> KSG <b>M</b> Y <b>S</b> LL <b>G</b> TIAEK <b>F</b> PE <b>Y</b> IMP--HA <b>Q</b> Q <b>L</b> L <b>T</b> IY <b>L</b> N <b>T</b> L <b>K</b> -----SQ <b>M</b> T <b>G</b> K <b>N</b> T-K <b>L</b> D                                              | 212               |
| NEMATOSTELLA | QQST <b>V</b> RF <b>W</b> LY <b>T</b> IL <b>G</b> VFAEV <b>F</b> PE <b>H</b> ML <b>G</b> --N <b>A</b> DR <b>L</b> I <b>S</b> IY <b>I</b> N <b>L</b> L <b>N</b> -----SE <b>M</b> K <b>S</b> K <b>G</b> N <b>K</b> SP <b>D</b>                             | 214               |
| PRIAPULA     | LTST <b>V</b> KQ <b>G</b> VY <b>H</b> LL <b>G</b> VIAES <b>Y</b> PE <b>L</b> M <b>V</b> A--Y <b>A</b> D <b>K</b> L <b>I</b> S <b>I</b> Y <b>V</b> N <b>E</b> L <b>K</b> -----N <b>Q</b> M <b>K</b> S <b>K</b> T <b>K</b> -K <b>P</b> E                   | 215               |
| SOFTCORAL    | KKSS <b>V</b> SY <b>G</b> IY <b>S</b> LL <b>G</b> T <b>L</b> AEY <b>F</b> PE <b>Y</b> M <b>V</b> D--K <b>A</b> DR <b>L</b> V <b>Q</b> IY <b>V</b> G <b>V</b> L <b>K</b> -----A <b>E</b> -M <b>R</b> K <b>S</b> G-K <b>P</b> D                            | 211               |
| PISTILLATA   | HSST <b>V</b> KY <b>W</b> LF <b>S</b> LL <b>G</b> TIAK <b>V</b> PE <b>C</b> V <b>I</b> S--H <b>S</b> D <b>H</b> L <b>V</b> K <b>H</b> Y <b>V</b> S <b>V</b> L <b>K</b> LEN <b>L</b> I <b>P</b> M <b>Q</b> M <b>T</b> R <b>K</b> T <b>K</b> -K <b>P</b> D | 218               |
| HEMICHOR     | LAAT <b>V</b> K <b>H</b> G <b>I</b> Y <b>H</b> LL <b>G</b> VFAQ <b>Y</b> Y <b>P</b> EL <b>M</b> T <b>K</b> --Y <b>S</b> DR <b>L</b> LN <b>V</b> Y <b>M</b> K <b>A</b> L <b>K</b> -----D <b>Q</b> ML <b>S</b> K <b>T</b> K-Q <b>A</b> E                   | 214               |
| BELCHER      | TTAT <b>V</b> K <b>S</b> G <b>A</b> LS <b>L</b> G <b>V</b> ISEV <b>Y</b> P <b>D</b> LM <b>V</b> Q <b>K</b> D <b>H</b> PD <b>R</b> LL <b>K</b> VY <b>I</b> S <b>M</b> L <b>K</b> -----E <b>Q</b> M <b>E</b> S <b>R</b> TR-K <b>P</b> E                    | 217               |
| STRONG       | LSQS <b>V</b> K <b>L</b> G <b>I</b> Y <b>Q</b> T <b>L</b> G <b>A</b> F <b>G</b> EY <b>Y</b> P <b>Q</b> L <b>M</b> M <b>H</b> --Y <b>S</b> DR <b>L</b> FN <b>V</b> LV <b>S</b> T <b>L</b> K-----Q <b>Q</b> M <b>T</b> T <b>K</b> T <b>K</b> -K <b>P</b> E | 215               |
| STARFISH     | LSQT <b>V</b> K <b>Q</b> G <b>I</b> Y <b>C</b> LL <b>G</b> VLA <b>E</b> IY <b>P</b> VL <b>M</b> S <b>G</b> --Y <b>S</b> ER <b>L</b> LS <b>V</b> Y <b>I</b> AT <b>L</b> N-----Q <b>Q</b> M <b>T</b> S <b>K</b> TR-K <b>P</b> E                            | 214               |
|              | :        **        *        :        :                                                                                                                                                                                                                   |                   |

Supplementary Figure 9: Clustal Omega: DNA-PKcs alignment metazoan plus "putative archaeon"

|              |                                                                                                                                                                                                                                                                                                                          | <b>RYG70452.1</b> |
|--------------|--------------------------------------------------------------------------------------------------------------------------------------------------------------------------------------------------------------------------------------------------------------------------------------------------------------------------|-------------------|
| ARCHAEON     | FP <b>AI</b> AG <b>F</b> SC <b>L</b> DK <b>C</b> LY <b>H</b> FE <b>A</b> RYV----NSTEL <b>W</b> KY <b>L</b> LQ <b>A</b> AQ <b>S</b> SA--QEDTSR <b>F</b> SA <b>A</b> G <b>K</b> AI                                                                                                                                         | 307               |
| MUDCRAB      | LI <b>A</b> LAG <b>V</b> LR <b>G</b> LT <b>L</b> Y <b>L</b> FN <b>F</b> PEGIDDDPL <b>L</b> Y <b>K</b> TL <b>F</b> EH <b>V</b> R <b>K</b> AL <b>N</b> PN <b>L</b> ----DLHRRDAQ <b>R</b> A <b>A</b> L                                                                                                                      | 266               |
| SCORPION     | SS <b>I</b> IV <b>G</b> CL <b>Q</b> GL <b>N</b> EF <b>M</b> Y <b>Q</b> FL <b>Q</b> DT <b>E</b> DE <b>T</b> E <b>K</b> AY <b>Q</b> L <b>F</b> K <b>F</b> IR <b>I</b> IL <b>S</b> KR-----DV <b>K</b> TY <b>D</b> MA <b>K</b> AS <b>L</b>                                                                                   | 270               |
| SPONGE       | LP <b>I</b> IS <b>G</b> CL <b>Y</b> GL <b>T</b> AY <b>L</b> NN <b>F</b> S <b>Q</b> S <b>A</b> SE <b>G</b> S <b>V</b> YA <b>Q</b> DI <b>Y</b> K <b>Y</b> TR <b>M</b> AID <b>P</b> LA----NLTRYEV <b>P</b> RA <b>G</b> L                                                                                                    | 265               |
| CAPITELLA    | Y <b>V</b> LI <b>A</b> GC <b>L</b> Q <b>G</b> L <b>T</b> H <b>F</b> M <b>V</b> N <b>F</b> T <b>Q</b> SA <b>D</b> E <b>G</b> A <b>E</b> H <b>A</b> YS <b>I</b> Y <b>K</b> Y <b>C</b> V <b>K</b> T <b>M</b> D <b>Q</b> NI----K <b>K</b> K <b>R</b> Y <b>E</b> M <b>P</b> K <b>A</b> S <b>L</b>                             | 269               |
| DANIO        | LP <b>V</b> V <b>A</b> GC <b>L</b> K <b>G</b> IA <b>A</b> LM <b>V</b> N <b>F</b> T <b>K</b> S <b>V</b> E <b>E</b> D <b>P</b> A <b>A</b> S <b>K</b> E <b>I</b> F <b>D</b> Y <b>A</b> L <b>K</b> A <b>I</b> S <b>P</b> Q <b>T</b> ----D <b>I</b> K <b>R</b> Y <b>A</b> V <b>I</b> F <b>A</b> G <b>L</b>                    | 287               |
| MILII        | FL <b>V</b> VS <b>G</b> CL <b>R</b> GL <b>T</b> AL <b>M</b> IN <b>F</b> T <b>K</b> S <b>M</b> E <b>E</b> D <b>P</b> K <b>A</b> S <b>K</b> DI <b>F</b> D <b>Y</b> A <b>L</b> K <b>A</b> IN <b>P</b> Q <b>I</b> ----D <b>L</b> K <b>R</b> Y <b>A</b> V <b>P</b> LA <b>G</b> L                                              | 276               |
| BAMBOO       | FL <b>V</b> VS <b>G</b> CL <b>R</b> GL <b>I</b> AL <b>M</b> VN <b>F</b> T <b>K</b> S <b>I</b> E <b>E</b> D <b>P</b> R <b>T</b> S <b>K</b> E <b>I</b> F <b>D</b> CA <b>V</b> KA <b>I</b> N <b>L</b> K <b>I</b> ----D <b>I</b> K <b>R</b> Y <b>A</b> V <b>P</b> LA <b>G</b> L                                              | 277               |
| XENOPUS      | FP <b>V</b> I <b>A</b> GC <b>L</b> K <b>G</b> L <b>S</b> AL <b>M</b> IN <b>F</b> T <b>K</b> T <b>M</b> E <b>E</b> D <b>P</b> R <b>T</b> S <b>K</b> E <b>I</b> F <b>D</b> Y <b>T</b> V <b>K</b> A <b>I</b> S <b>P</b> Q <b>V</b> ----E <b>M</b> K <b>R</b> Y <b>A</b> V <b>P</b> S <b>A</b> G <b>L</b>                    | 292               |
| STERLET      | LP <b>V</b> V <b>A</b> GC <b>L</b> K <b>G</b> L <b>T</b> AL <b>M</b> IN <b>F</b> T <b>K</b> S <b>M</b> D <b>E</b> D <b>P</b> K <b>S</b> S <b>K</b> E <b>I</b> F <b>D</b> F <b>A</b> L <b>K</b> A <b>I</b> S <b>P</b> Q <b>T</b> ----E <b>F</b> K <b>R</b> Y <b>A</b> V <b>L</b> LA <b>G</b> L                            | 281               |
| GAR          | L <b>P</b> L <b>V</b> V <b>A</b> GC <b>L</b> K <b>G</b> L <b>T</b> AL <b>L</b> VN <b>F</b> T <b>K</b> S <b>M</b> S <b>E</b> D <b>P</b> K <b>T</b> S <b>K</b> E <b>I</b> F <b>D</b> Y <b>A</b> L <b>K</b> S <b>I</b> S <b>P</b> Q <b>T</b> ----E <b>F</b> K <b>R</b> Y <b>A</b> V <b>L</b> F <b>A</b> G <b>L</b>          | 276               |
| LATIMERIA    | LS <b>V</b> V <b>A</b> GC <b>L</b> R <b>G</b> L <b>T</b> AL <b>M</b> IN <b>F</b> T <b>K</b> S <b>V</b> D <b>E</b> D <b>P</b> K <b>T</b> S <b>K</b> E <b>I</b> F <b>D</b> Y <b>A</b> V <b>M</b> A <b>I</b> S <b>P</b> Q <b>V</b> ----D <b>L</b> K <b>R</b> Y <b>A</b> V <b>P</b> LA <b>G</b> L                            | 273               |
| CAECIL       | LS <b>V</b> V <b>A</b> GC <b>L</b> K <b>G</b> L <b>T</b> SL <b>M</b> IN <b>F</b> T <b>K</b> S <b>M</b> D <b>E</b> D <b>P</b> K <b>V</b> S <b>K</b> E <b>I</b> F <b>D</b> Y <b>S</b> V <b>K</b> A <b>I</b> S <b>P</b> Q <b>V</b> ----E <b>L</b> K <b>R</b> Y <b>A</b> V <b>P</b> LA <b>G</b> L                            | 278               |
| SNAKE        | FP <b>I</b> V <b>A</b> GC <b>L</b> K <b>G</b> L <b>T</b> AL <b>M</b> YN <b>F</b> T <b>K</b> S <b>M</b> D <b>E</b> D <b>P</b> R <b>T</b> S <b>K</b> E <b>I</b> F <b>D</b> FA <b>V</b> KA <b>I</b> S <b>P</b> K <b>I</b> ----D <b>L</b> K <b>R</b> Y <b>A</b> V <b>P</b> LA <b>G</b> L                                     | 276               |
| CANARY       | L <b>P</b> L <b>V</b> V <b>A</b> GC <b>L</b> R <b>G</b> L <b>M</b> YN <b>F</b> T <b>K</b> S <b>V</b> D <b>E</b> D <b>P</b> Q <b>T</b> A <b>K</b> E <b>I</b> F <b>D</b> FA <b>M</b> KA <b>I</b> N <b>P</b> Q <b>V</b> ----D <b>Q</b> K <b>R</b> Y <b>A</b> V <b>P</b> LA <b>G</b> L                                       | 268               |
| OSTRICH      | LP <b>I</b> V <b>A</b> GC <b>L</b> R <b>G</b> LA <b>L</b> M <b>Y</b> N <b>F</b> T <b>K</b> S <b>E</b> D <b>E</b> D <b>P</b> Q <b>T</b> A <b>K</b> E <b>I</b> F <b>D</b> FA <b>M</b> KA <b>I</b> R <b>P</b> Q <b>I</b> ----D <b>Q</b> K <b>R</b> Y <b>A</b> V <b>Q</b> LA <b>G</b> L                                      | 239               |
| GECKO        | FP <b>V</b> V <b>A</b> GC <b>L</b> K <b>G</b> L <b>T</b> AL <b>M</b> YN <b>F</b> T <b>K</b> S <b>M</b> D <b>E</b> D <b>P</b> Q <b>T</b> S <b>K</b> E <b>I</b> F <b>D</b> FA <b>V</b> KA <b>I</b> N <b>P</b> Q <b>V</b> ----D <b>L</b> K <b>R</b> Y <b>A</b> V <b>P</b> LA <b>G</b> L                                     | 276               |
| TURTLE       | LP <b>V</b> V <b>A</b> GC <b>L</b> K <b>G</b> L <b>T</b> AL <b>M</b> YN <b>F</b> T <b>K</b> S <b>M</b> D <b>E</b> D <b>P</b> H <b>T</b> S <b>K</b> E <b>I</b> F <b>D</b> FA <b>V</b> KA <b>I</b> N <b>P</b> Q <b>V</b> ----D <b>L</b> K <b>R</b> Y <b>A</b> V <b>P</b> LA <b>G</b> L                                     | 277               |
| ALLIGATOR    | LP <b>V</b> V <b>A</b> GC <b>L</b> K <b>G</b> L <b>T</b> AL <b>L</b> Y <b>N</b> F <b>T</b> K <b>S</b> M <b>E</b> E <b>D</b> P <b>R</b> T <b>S</b> K <b>E</b> V <b>F</b> D <b>F</b> S <b>V</b> KA <b>I</b> N <b>P</b> Q <b>V</b> ----D <b>L</b> K <b>R</b> Y <b>A</b> V <b>P</b> LA <b>G</b> L                            | 237               |
| PLATYPUS     | LP <b>V</b> V <b>A</b> GC <b>L</b> K <b>G</b> L <b>S</b> AL <b>M</b> C <b>N</b> F <b>T</b> K <b>S</b> M <b>D</b> E <b>D</b> P <b>Q</b> T <b>S</b> K <b>E</b> I <b>F</b> D <b>F</b> A <b>V</b> KA <b>I</b> S <b>P</b> Q <b>V</b> ----D <b>L</b> K <b>R</b> Y <b>A</b> V <b>P</b> LA <b>G</b> L                            | 272               |
| TASDEVIL     | LP <b>V</b> V <b>A</b> GC <b>L</b> K <b>G</b> L <b>S</b> SL <b>M</b> YN <b>F</b> T <b>K</b> S <b>M</b> D <b>E</b> D <b>P</b> Q <b>M</b> S <b>K</b> E <b>I</b> F <b>D</b> F <b>A</b> L <b>K</b> A <b>I</b> S <b>P</b> Q <b>V</b> ----D <b>L</b> K <b>R</b> Y <b>A</b> V <b>P</b> LA <b>G</b> L                            | 273               |
| <b>HUMAN</b> | <b>LPVLAGCLKGLSSLLCNFTKSMEEDPQTSREIFNFVLKAIRPQI----DLKRYAVPSAGL</b>                                                                                                                                                                                                                                                      | <b>272</b>        |
| MOUSE        | FP <b>V</b> LAG <b>L</b> K <b>G</b> L <b>S</b> SL <b>L</b> C <b>N</b> F <b>T</b> K <b>S</b> M <b>E</b> E <b>D</b> P <b>Q</b> T <b>S</b> K <b>E</b> I <b>F</b> G <b>F</b> T <b>F</b> KA <b>I</b> R <b>P</b> Q <b>I</b> ----E <b>M</b> K <b>R</b> Y <b>A</b> V <b>P</b> LA <b>G</b> L                                      | 272               |
| CRASSO2      | LS <b>V</b> IS <b>G</b> CL <b>E</b> GL <b>A</b> S <b>L</b> VN <b>F</b> T <b>E</b> D--ED <b>S</b> Q <b>N</b> S <b>Y</b> E <b>T</b> F <b>K</b> F <b>A</b> R <b>M</b> AID <b>P</b> DI----N <b>Y</b> TR <b>Y</b> D <b>V</b> P <b>R</b> A <b>G</b> L                                                                          | 268               |
| POMACEA      | FP <b>V</b> I <b>V</b> GC <b>L</b> Q <b>G</b> L <b>T</b> AY <b>L</b> VN <b>F</b> T <b>Q</b> SS <b>D</b> E <b>G</b> SS <b>H</b> S <b>Y</b> E <b>I</b> F <b>N</b> Y <b>A</b> R <b>M</b> AID <b>H</b> K <b>V</b> ----E <b>F</b> S <b>K</b> Y <b>D</b> V <b>P</b> K <b>A</b> G <b>L</b>                                      | 265               |
| TRICHOPLAX   | MP <b>V</b> I <b>Y</b> GC <b>L</b> R <b>G</b> L <b>T</b> S <b>Y</b> L <b>Y</b> N <b>F</b> T <b>Q</b> S <b>V</b> E <b>E</b> S <b>K</b> Y <b>A</b> DI <b>Y</b> K <b>Y</b> AR <b>L</b> AID <b>P</b> K <b>V</b> ----E <b>L</b> P <b>R</b> Y <b>D</b> L <b>P</b> K <b>A</b> G <b>L</b>                                        | 268               |
| NEMATOSTELLA | K <b>Q</b> V <b>I</b> AG <b>L</b> K <b>G</b> L <b>S</b> S <b>Y</b> L <b>V</b> N <b>F</b> T <b>Q</b> S <b>A</b> A <b>E</b> G <b>S</b> K <b>F</b> A <b>R</b> DI <b>Y</b> E <b>F</b> TR <b>M</b> AID <b>V</b> Q <b>G</b> ----T <b>L</b> Q <b>R</b> Y <b>D</b> V <b>P</b> RA <b>G</b> L                                      | 270               |
| PRIAPULA     | Y <b>P</b> V <b>I</b> T <b>G</b> CL <b>R</b> GL <b>T</b> C <b>Y</b> L <b>N</b> T <b>F</b> S <b>Q</b> S <b>A</b> D <b>E</b> G <b>S</b> G <b>Y</b> A <b>R</b> D <b>V</b> Y <b>D</b> C <b>V</b> M <b>R</b> CT <b>G</b> Q <b>H</b> L---S <b>E</b> I <b>R</b> R <b>Y</b> D <b>V</b> A <b>K</b> S <b>A</b> L                   | 272               |
| SOFTCORAL    | MP <b>V</b> V <b>A</b> GC <b>I</b> R <b>G</b> L <b>D</b> ST <b>L</b> VN <b>F</b> T <b>Q</b> S <b>V</b> N <b>E</b> G <b>S</b> I <b>Y</b> A <b>K</b> NI <b>Y</b> S <b>F</b> L <b>R</b> S <b>A</b> ID <b>S</b> K <b>I</b> ----N <b>Y</b> A <b>R</b> Y <b>D</b> V <b>P</b> RA <b>G</b> L                                     | 267               |
| PISTILLATA   | ML <b>I</b> I <b>A</b> GC <b>L</b> R <b>G</b> L <b>T</b> S <b>Y</b> L <b>T</b> N <b>F</b> T <b>Q</b> S <b>V</b> S <b>E</b> G <b>S</b> K <b>F</b> A <b>K</b> DI <b>Y</b> T <b>Y</b> G <b>R</b> M <b>A</b> IN <b>P</b> Q <b>V</b> ----S <b>L</b> S <b>R</b> Y <b>E</b> V <b>P</b> K <b>A</b> G <b>L</b>                    | 274               |
| HEMICHOR     | LP <b>V</b> V <b>A</b> GC <b>L</b> L <b>G</b> L <b>T</b> H <b>L</b> L <b>V</b> N <b>F</b> T <b>Q</b> S <b>V</b> E <b>E</b> D <b>G</b> K <b>H</b> T <b>L</b> DI <b>Y</b> K <b>F</b> AS <b>L</b> AM <b>D</b> P <b>S</b> T----Q <b>L</b> L <b>R</b> Y <b>G</b> V <b>P</b> E <b>A</b> G <b>L</b>                             | 270               |
| BELCHER      | ML <b>V</b> IS <b>G</b> CL <b>E</b> GL <b>T</b> H <b>F</b> L <b>V</b> N <b>F</b> T <b>Q</b> S <b>V</b> E <b>E</b> G <b>S</b> A <b>H</b> S <b>K</b> DI <b>Y</b> N <b>F</b> TR <b>R</b> A <b>V</b> S <b>P</b> Q <b>V</b> ----E <b>M</b> A <b>R</b> Y <b>D</b> V <b>P</b> K <b>A</b> A <b>L</b>                             | 273               |
| STRONG       | MT <b>V</b> V <b>A</b> GC <b>L</b> M <b>G</b> L <b>S</b> H <b>L</b> L <b>V</b> N <b>F</b> T <b>Q</b> S <b>V</b> E <b>E</b> NS <b>K</b> H <b>C</b> K <b>D</b> I <b>Y</b> Q <b>Y</b> V <b>T</b> M <b>S</b> V <b>D</b> P <b>G</b> P <b>Y</b> R <b>S</b> G <b>T</b> K <b>P</b> R <b>Y</b> E <b>I</b> P <b>K</b> A <b>G</b> L | 275               |
| STARFISH     | LT <b>V</b> I <b>A</b> GC <b>L</b> T <b>G</b> L <b>G</b> H <b>Y</b> L <b>V</b> N <b>F</b> T <b>Q</b> S <b>V</b> E <b>E</b> G <b>A</b> K <b>H</b> S <b>K</b> DI <b>Y</b> R <b>F</b> A <b>R</b> M <b>A</b> ID <b>P</b> T <b>V</b> ----D <b>H</b> TR <b>Y</b> E <b>L</b> N <b>K</b> A <b>G</b> L                            | 270               |

: \* : : \* : : .:

↑

Supplementary Figure 9: Clustal Omega: DNA-PKcs alignment metazoan plus “putative archaeon”

|              | End RYG70452.1                                                  | Start RYG70451.1 (Archaeon) |        |
|--------------|-----------------------------------------------------------------|-----------------------------|--------|
| ARCHAEON     | KLIRNHAQLFVNVIGELVHSTLYAMNAQTSYGVVAAAHKSGKVALYKHSEGALQAVLAAA    | 367                         |        |
| MUDCRAB      | ELISSHGDKFSAQLYDHYD-----TLFPWFIQWCSSKNRDDYKAAIPALDTFITVL        | 317                         |        |
| SCORPION     | TLLSSHASLLAQFLYEDSM-----NIYKIIIEIWTNHSNREVRSLGYNALDAVFKQI       | 321                         |        |
| SPONGE       | SLISRHAQFREYLVKDSE-----HMYESLSSWSNHKNKECRVVAVNAIGSFREV          | 316                         |        |
| CAPITELLA    | GLMAKHSQAQMSDYLLDDFK-----DLYETLSYWTNHNREMAHIGMLALEDFLVQI        | 320                         |        |
| DANIO        | KLFAKHSQFGSCLMDHYI-----SIFDVMKSKHCGHINAEKKSYSYTALESFLKQV        | 338                         |        |
| MILII        | RLFTLHSQFGTCLMDNYR-----TVFEKMKKSCGHTNSEMKKASYSALESFLKQV         | 327                         |        |
| BAMBOO       | RLFTLHANQFKTCLLDNYR-----VLFETMSKWCGHTNIEMKKAGYAALLESFLKEI       | 328                         |        |
| XENOPUS      | NLLALHASQFSSYLMDDYQ-----SLFEVISKWCGHTNGEMKKLAFALDSFLKQI         | 343                         |        |
| STERLET      | RLFAKHAGQFSSCLMDNYR-----SLYEVMSKWCGHTNIEMKKAGYHALEAFKQV         | 332                         |        |
| GAR          | KLFARHAEQFSSCLIDNYR-----SIFEVMSKWCGHTNAELKRAGHSALLESFLKQV       | 327                         |        |
| LATIMERIA    | RMFALHANQFNTCLMDNYR-----SLFETMSKCCGHANGELKRAGYAALLENFLKQV       | 324                         |        |
| CAECIL       | HMLAIHASQFGSCLMDNYR-----SLYEVMSKWCGHTNADLKKAGHLALESFLKQI        | 329                         |        |
| SNAKE        | HLFSKHAEQFSTCLLDNYV-----SLFHTMAKWCGHQNAELKKAGHSALDSFLKQV        | 327                         |        |
| CANARY       | QLFIWHSQAQFGALLLDNYV-----SLYEVMSKWCGHTHPELKKASYSALDSFLKQI       | 319                         |        |
| OSTRICH      | QLFGRHAAQFGTFLLDYSV-----SLFETMCKWCGHTNQELKKAGHSALDSFLKQI        | 290                         |        |
| GECKO        | HLFSVHAVQFSTCLLDNYV-----SLFEVMSKWCGHQNAELRKVNSALDAFLKQV         | 327                         |        |
| TURTLE       | HLFSMHAAQFGTFLLDNYI-----SLFEVLSKWCGHTNAELKKGGHSALDSFLRQI        | 328                         |        |
| ALLIGATOR    | RMFGLHAAQFGTCLLDNYV-----MLFEVMSKWCGHTNVDLKKAGHSALDSVLKQI        | 288                         |        |
| PLATYPUS     | HLFTVHASQFGTNLLDNYV-----YLFVEMAKWCGHTNGELKKVAHSALDSFLKQI        | 323                         |        |
| TASDEVIL     | RLFTLHASQFSTCLLDNYI-----SLFEIMSKWCGHTNGELKKIAHSALDSFLKQV        | 324                         |        |
| <b>HUMAN</b> | <b>RLFALHASQFSTCLLDNYV-----SLFEVLLKWAHTNVELKKAALSALLESFLKQV</b> | <b>323</b>                  |        |
| MOUSE        | RLLTLHASQFTACLLDNYI-----TLFEVLSKWCSTNVELKKAHSALLESFLRQI         | 323                         |        |
| CRASSO2      | KLFSRHSQAQFKSQLADDYQ-----GMYQKLSWSKHNNRELLHLGTAAMEAFLTQI        | 319                         |        |
| POMACEA      | QLFARHAGQFSQFLVDDYE-----NMYTKLQAWSKHQNRDVLHHGVAAMD AFLRQI       | 316                         |        |
| TRICHOPLAX   | NLIAKHAAQFCDYISREAE-----ALYEVIYRWRHRNRDIRAAAFHAALEEIMKQI        | 319                         |        |
| NEMATOSTELLA | NLLSRHAGQFQEYICTEHNVS-----IVYPAIYRWCCQNRETKYAALDAMD SFKQV       | 324                         |        |
| PRIAPULA     | WLLAKHAAQLDRFLLADYK-----AVYSCLRSWSRHHNRDVQIAGYAALAEAVLKQI       | 323                         |        |
| SOFTCORAL    | NFLARHASQYKEYLTKDYE-----SVYNTLFDWCKRKNKELRVKGFAALEAFKQV         | 318                         |        |
| PISTILLATA   | YLFKHSQAQFKEYIAKDYE-----VMYGDLYRWCKHHNKETSAYAAMEAFFQOI          | 325                         |        |
| HEMICHOR     | WLLAKHAPQFNKYLLDDHE-----EMYDKLFSWCQHNNRDMKSAGYASLEAFKQV         | 321                         |        |
| BELCHER      | WLLAKHAAQFNEYLLMNDYE-----DMYRKL YEWSQHPNRDLKQAGYAALLESFLKQI     | 324                         |        |
| STRONG       | NLIRRHADQFNEYLYRDHE-----MVYNRLKYWSHSHNSEMKWAGYDALQAFFKVV        | 326                         |        |
| STARFISH     | NMFAKHSQAQFGPYLYSDHQ-----DLHEAFNKWSAHNNPAVKAVGFAAQEAFLQOI       | 321                         |        |
|              | :: * . :                                                        | . . :                       | . : :: |

Supplementary Figure 9: Clustal Omega: DNA-PKcs alignment metazoan plus “putative archaeon”

|              |                                                                                          | <b>RYG70451.1</b> |
|--------------|------------------------------------------------------------------------------------------|-------------------|
| ARCHAEON     | ASYLVQNMHTGSNAVKKKTCDMVNKLLLEAHLKVLQDPGTLRSNSDDTVV <b>ALQGLNALSLAV</b>                   | 427               |
| MUDCRAB      | SNILELQSSD--KK--TVEIFKYL <b>LLQ</b> EYNK <b>ML</b> ET----GKSTNQVSL <b>AVKGYGLLSG</b> --  | 367               |
| SCORPION     | SDMLEQNYEDS---C--KAEIFK <b>FIEK</b> FQ <b>LM</b> IKC----SENIRRVST <b>AIRGFYFAK</b> --    | 370               |
| SPONGE       | STQISDPSISR--EL--GISNYK <b>FFMKCFRSL</b> MNDP---DINHRLLSI <b>AVKGYGHFAK</b> --           | 367               |
| CAPITELLA    | SSALVTKVKEG--NRK--EGAVFK <b>FFIQKFRD</b> IMDNN---SSGSKEIAI <b>AIKGYGYFAA</b> --          | 372               |
| DANIO        | ATLVAENIELH-----KSKLK <b>FFMQKFC</b> AI <b>IRT</b> M---DSTNKELSI <b>AIRGYGLFAA</b> --    | 386               |
| MILII        | AIQVAENAHLH-----KDKLEY <b>IMQQFY</b> DI <b>IRT</b> P---ESSMKELSI <b>AIRGYGLFAA</b> --    | 375               |
| BAMBOO       | ALQVAEDAHLH-----KDKLQ <b>YFMQQFY</b> SI <b>IRT</b> M---ESSTKELSI <b>AIRGYGLFAA</b> --    | 376               |
| XENOPUS      | AHLVASDAETH-----KNKLH <b>FFMEQFY</b> EI <b>IRK</b> M---DSSNKELSI <b>AIRGYGLFAA</b> --    | 391               |
| STERLET      | ALLVAENAELH-----KSKLE <b>FFMRQFY</b> T <b>VRT</b> L---DSSTKELSI <b>AIRGYGLFAA</b> --     | 380               |
| GAR          | AVLVAENAELH-----KSKLK <b>FFMQQFC</b> SI <b>IKT</b> T---DSTNKELSI <b>AIRGYGLFAA</b> --    | 375               |
| LATIMERIA    | AAMVAENAELH-----KNKLEY <b>FMKQFY</b> GI <b>IRT</b> L---DSSNKELSI <b>AIRGYGLFAA</b> --    | 372               |
| CAECIL       | ASIVTHDAETH-----KSKLQ <b>FMQFY</b> RI <b>IRK</b> L---DSSNKELSI <b>AIRGYGLFAA</b> --      | 377               |
| SNAKE        | SSMVAKDVEMH-----KSKLR <b>FFMEFY</b> GI <b>IRN</b> M---DASNKELSI <b>AIRGYGLFAA</b> --     | 375               |
| CANARY       | SLMVAKDAELH-----KSKLR <b>FFMEQFY</b> GT <b>IRR</b> M---DSSSKELSI <b>AIRGYGLFAS</b> --    | 367               |
| OSTRICH      | SLMVAKDAELH-----KSKLQ <b>FMQFY</b> GI <b>IRR</b> M---DSSNRELSI <b>AIHGYGLFAA</b> --      | 338               |
| GECKO        | SEMVAKDAEMH-----KSKLNY <b>FMKQFY</b> SI <b>IRK</b> M---DSSNKELSI <b>AIRGYGLFAA</b> --    | 375               |
| TURTLE       | SLMVAKDAEMH-----KSKLQ <b>FMKQFY</b> DI <b>IRK</b> M---DSSNKELSI <b>AIRGYGLFAA</b> --     | 376               |
| ALLIGATOR    | SLMVAKDAEMH-----KSKLK <b>FFMEQFY</b> SI <b>IRK</b> M---DSSNKELSI <b>AIRGYGLFAA</b> --    | 336               |
| PLATYPUS     | SLMVAKDVELH-----RSKLQ <b>YFMQFY</b> EI <b>IRK</b> I---DSTNKELSI <b>AIRGYGLFAA</b> --     | 371               |
| TASDEVIL     | SLMVAKDAEAH-----TSTLRY <b>FTEQFY</b> GI <b>IRN</b> V---DSSSKELSI <b>AIRGYGMFAG</b> --    | 372               |
| <b>HUMAN</b> | <b>SNMVAKNAEMH-----KNKLQYFMQFYGIIRNV---DSNNKELSI<b>AIRGYGLFAG</b>--</b>                  | <b>371</b>        |
| MOUSE        | SFTVAEDAELH-----KSRLKY <b>FMEQFY</b> GI <b>IRN</b> T---DSNNKELAI <b>AIRGYGLFAG</b> --    | 371               |
| CRASSO2      | SEVLVTKAREG--KK--EAAMFK <b>FFVTRFKE</b> IMENS---SASAKEMSL <b>AIRGYGLLAA</b> --           | 370               |
| POMACEA      | AEAIT <b>TEK</b> AKRG--IK--EGGIFK <b>FFVQVFQTTM</b> QNS---SASSKEVSM <b>AVRGYGLFAA</b> -- | 367               |
| TRICHOPLAX   | AEYLVNEND---AA--NINIFK <b>FFLKKFR</b> SI <b>ID</b> SG---SSDAKELAI <b>AIRGYGYFAA</b> --   | 368               |
| NEMATOSTELLA | SEYIVLDEA-----E--AVNPKED <b>FIQRFRAI</b> <b>ID</b> SD---SSTTQQMSI <b>AIRGYGFFAK</b> --   | 372               |
| PRIAPULA     | ASVLVEGGEET-RQR--DTIV <b>FTFVRE</b> FRTI <b>IEA</b> ---GTDTRDVAI <b>AVRGYGSFAT</b> --    | 374               |
| SOFTCORAL    | AECLVTEDFET-TVE--CGDIFK <b>FFIKEFRRI</b> <b>INS</b> N---ESLTREISI <b>AIRGYGYFAK</b> --   | 370               |
| PISTILLATA   | SLYFVGRHG---DKS--DLAMF <b>YFIKTFRRI</b> <b>ID</b> SV---LSDTRQMAI <b>AVRGYGYFSK</b> --    | 375               |
| HEMICHOR     | ASMLVEEGNKD-KRN--KTTIFK <b>AFIRKFRSI</b> <b>ID</b> NR---ESGTREICI <b>AIKGYGLFAA</b> --   | 373               |
| BELCHER      | SDMLVARHEKENKA--DLAVFK <b>FFIRE</b> FRTI <b>ID</b> TT---EAGTREMSI <b>AVRGYGFFAA</b> --   | 377               |
| STRONG       | SHMLVENADKK-RSS--DVAVLK <b>YFIKFRST</b> <b>ID</b> DA---SSSSKSLST <b>AIRGYGVFAA</b> --    | 378               |
| STARFISH     | AEILVERAAKR-DAS--DMAVFR <b>FFVKFRDI</b> <b>ID</b> NP---QSDTRALSS <b>AVRGYGYFAA</b> --    | 373               |
|              | : . : . :                                                                                | *::* . ::         |

Supplementary Figure 9: Clustal Omega: DNA-PKcs alignment metazoan plus "putative archaeon"

|              |                                                           | <b>RYG70451.1</b> |
|--------------|-----------------------------------------------------------|-------------------|
| ARCHAEON     | SPAPLGGQYAFQLNYCCADVIRTVVEIGDHYNRYQRSSKGDSEANGEGTAGNNQSAF | 487               |
| MUDCRAB      | -ACRIL-----LSPMEVHTMFLQV-----                             | 385               |
| SCORPION     | -VCKLY-----LTEKDVKYMLNDV-----                             | 388               |
| SPONGE       | -PCRLY-----GSMEDLHFMTGEM-----                             | 385               |
| CAPITELLA    | -PCKLY-----LTPKDVLFMFNEM-----                             | 390               |
| DANIO        | -PCKVV-----CPQDVDFMYTEL-----                              | 403               |
| MILII        | -PCKAV-----NSNDVDFMYIEL-----                              | 392               |
| BAMBOO       | -PCKAV-----DSHVDVDFMYTEL-----                             | 393               |
| XENOPUS      | -PCKAV-----NAKNVDLMYIEL-----                              | 408               |
| STERLET      | -PCKAV-----CLGDVDFMYTEL-----                              | 397               |
| GAR          | -PCKAV-----CPQDVDFMYTEL-----                              | 392               |
| LATIMERIA    | -PCKAV-----CPEDVDLMYTEL-----                              | 389               |
| CAECIL       | -PCKVI-----NAKDVDFMYIEL-----                              | 394               |
| SNAKE        | -PCKVI-----NPKDVDFMYVEL-----                              | 392               |
| CANARY       | -PCKAI-----HPEDVDNMYVEL-----                              | 384               |
| OSTRICH      | -PCKAI-----RSKDVDFMYVEL-----                              | 355               |
| GECKO        | -PCKAI-----NSKDVDFMYVEL-----                              | 392               |
| TURTLE       | -PCKAI-----NSKDVDFMYVEL-----                              | 393               |
| ALLIGATOR    | -PCKAI-----NSKVDVIMYIEL-----                              | 353               |
| PLATYPUS     | -PCKVI-----NPNDVDIMYIEL-----                              | 388               |
| TASDEVIL     | -PCKSI-----NAKDVDFMYIEL-----                              | 389               |
| <b>HUMAN</b> | <b>-PCKVI-----NAKDVDFMYVEL-----</b>                       | <b>388</b>        |
| MOUSE        | -PCKVI-----NAKDVDFMYVEL-----                              | 388               |
| CRASSO2      | -PCREF-----LQKDVQFMFSEM-----                              | 388               |
| POMACEA      | -PCSIF-----LEPADVTFMFSEM-----                             | 385               |
| TRICHOPLAX   | -PCKTL-----LKKDVRFMFMDL-----                              | 386               |
| NEMATOSTELLA | -PCKLF-----MTAEDVKFMFTEM-----                             | 390               |
| PRIAPULA     | -PCKLF-----LSEADVQYMFTDM-----                             | 392               |
| SOFTCORAL    | -PCKVF-----LKDEDIKYMFTSI-----                             | 388               |
| PISTILLATA   | -PCKLF-----MQADDVRFMFSEI-----                             | 393               |
| HEMICHOR     | -PCKLF-----LSEDDVKFMFNEM-----                             | 391               |
| BELCHER      | -PCKMF-----LSESDVKFMFSEM-----                             | 395               |
| STRONG       | -PCKAF-----MKEADVRFMFNEI-----                             | 396               |
| STARFISH     | -PCKLF-----MTDDDVKFMFTEM-----                             | 391               |
|              | .                    .:            .:                     |                   |

Supplementary Figure 9: Clustal Omega: DNA-PKcs alignment metazoan plus "putative archaeon"

|              |                                                                    | <b>RYG70451.1</b> |
|--------------|--------------------------------------------------------------------|-------------------|
| ARCHAEON     | LVYCKSLFFCVVV-----SYLFNATVHCLSGTGQGGKLVVLENTASDQRLVQFLEELGVE       | 542               |
| MUDCRAB      | LSASHHAFYQSS-----EMLNKLNSLPSYIEALADI ICNMSTINVGIVENMLQLALA         | 438               |
| SCORPION     | IKKSEQHCLNEE-----KILDERIQILPSFLDSLSSIVLQLQEISESSLNYLEKLAVF         | 441               |
| SPONGE       | VQRSEQLFLASVDFTTSSSSVAFEEERFLPTFIEALANISKEIQNLPDVCLSSLQKLSVL       | 445               |
| CAPITELLA    | LHRSEQLFLSGA-----EQNDDRIIGLHSFLGALASIVEELDQFSETFLFSLERLVVL         | 443               |
| DANIO        | IQRCKQMYLTES-----DRDDDNVYQLPSFLDSIASVLVHLDRIPEVYTPVLERLLVV         | 456               |
| MILII        | IQRCKQMYLTEA-----DTEDDNVYQLPSFLDSIASVIFHLDKIPGVYTPVLERLLVV         | 445               |
| BAMBOO       | IQRCKQMYLTEA-----DTEDDNVYQLPSFLDSIASVIFHMDKIPDIYTSVLERLLVV         | 446               |
| XENOPUS      | IQRCKQMYLTEA-----DTEEDNVYQLPNFLQSVASVILHMDSIPEVYTPILERLLVV         | 461               |
| STERLET      | IQRCKQMYLTET-----DTEDDNVYQLPSFLDSIASVIFHLDRIPEVYTPVLERLLVV         | 450               |
| GAR          | IQRCKQMYLTET-----DTEDDNVYQLPSFLDSIASVLFHLDRIPEVYTPVLERLLVV         | 445               |
| LATIMERIA    | IQRCKQMYLTET-----DTEDDNVYQLPSFLQSIASVLFHIDRIPEVYTPVLERLLVV         | 442               |
| CAECIL       | IQRCKQMYLTEA-----ETEDDNMYQLPHFLQSIASVIVHMDSIPEVYTPVLERLLVV         | 447               |
| SNAKE        | LQRCKQMYLTEA-----ETIDDHVYQLPSFLQSIASVIFHLDTIPEIYTPVLERLMIV         | 445               |
| CANARY       | LQRCKQMFLTEA-----ETIDDHLYQLPSFLQSIASVIFHIDKVPEVYTPVLEHLVVL         | 437               |
| OSTRICH      | LQRCKQMYLTEA-----ETVDDHIYQLPSFLQSIASVIFHLDTIPEVYTPVLERLVVV         | 408               |
| GECKO        | LQRCKQMYLTEA-----ETMDDHVYQLPSFLQSIASVIFHLDTIPEVYSPVLERLIVV         | 445               |
| TURTLE       | LQRCKQMFLTEA-----ETADEHVYQLPSFLQSIASVIFHIDTIPEVYTPVLERLIVV         | 446               |
| ALLIGATOR    | LQRCKQMYLTEA-----ETADDNVYQLPSCLQSIASVIFHLDTLPEVYTPVLEHLIVM         | 406               |
| PLATYPUS     | IQRCKQMFLTEA-----ETIDHHLFQLPSFLQSIASVLLHLDKVPEVYTPVLERLLVV         | 441               |
| TASDEVIL     | IQRCKQMFLTET-----DTIDDHMYQLPSFLQSIASILLHLDTVPEVYTPVLERLIVV         | 442               |
| <b>HUMAN</b> | <b>IQRCKQMFLTQT-----DTGDDRVIYQMPNFLQSVASVLLYLDTVPEVYTPVLEHLVVM</b> | <b>441</b>        |
| MOUSE        | IQRCKQMFLTHA-----DASEDHVYQMPNFLQSIASVLLYLDTVPEVYTPVLEHLMVV         | 441               |
| CRASSO2      | ITKSEQLYLSSDK-----EDIEDKLYSLPSYLEALGNI IRQLDHPETYATSIERLMII        | 442               |
| POMACEA      | ITKCEQEFLRTN-----EPVHEKLSLPDYLHALASI IKVVTKVSEVYALTLERLVL          | 438               |
| TRICHOPLAX   | LQRSEQLFFID-----VNVDKIQYLPFLEAFASILNILDEVNDTFTRSLEKLTIV            | 437               |
| NEMATOSTELLA | MQRSEQIYLRQS-----EMQEDRVQQLPNFLEALSFI IEELDDISDGFLVSLERLIIV        | 443               |
| PRIAPULA     | VVRSRQIFHSGE-----EMIDSRMVELPPLLEALASIVTELDQVSESFLASLEQLVVL         | 445               |
| SOFTCORAL    | IQMSEQMYFNDS-----ELKEEKLQNLPSFLEALGFI VEEIDEIPPAFLSFLERLVVV        | 441               |
| PISTILLATA   | MQRSEQFYLSQS-----DLSEDRAQHLPTFLEALSSI IEELDKISDSVLACMERIVRV        | 446               |
| HEMICHOR     | IQRSEQLYFSQN-----ELVDETI PHLPFLEALACIVRELDVSDTFLSSLETMTVI          | 444               |
| BELCHER      | MQRSEQLYFGTA-----DSMEDKVHHLPSFLEALASIVQHLDQLSDMFVTSLERLVVV         | 448               |
| STRONG       | ILRSEQQLVQGG-----E---ERLSQLPTYLEALASIVGQLDTVSDTFLTSLEKLVVL         | 446               |
| STARFISH     | IQRSEQLYLQGG-----EVSDDKLNQLPNFLEALASIMRQLDVLSDSFQAALERLVVV         | 444               |
|              | : . . : . :                                                        |                   |

Supplementary Figure 9: Clustal Omega: DNA-PKcs alignment metazoan plus "putative archaeon"

|              |                                                                                      | <b>RYG70451.1</b> |
|--------------|--------------------------------------------------------------------------------------|-------------------|
| ARCHAEON     | VIVGYTKMYSKQQ--RFTRT <b>AMVKLF</b> IMHTLLGNRSDLTRKKHIADLYVTLTSLLDLAF <b>L</b>        | 600               |
| MUDCRAB      | LVENFPSVSVYKT--FLAYR <b>ALFKLF</b> YAIHGKAEYF-----QDFIHS <b>FVYKSVI</b>              | 485               |
| SCORPION     | QIQNFPYLPSPYH--FLCY <b>NSLIKLF</b> LAVHSGKQPQF-----KGFLNK <b>I IYQGI</b>             | 488               |
| SPONGE       | LFHCYPFLSSHVR--YQGS <b>VSLKLI</b> MAVSSIPTSF-----KQFLSH <b>IVYQGVI</b>               | 492               |
| CAPITELLA    | QMQVLPRLHVKLH--NQCY <b>IALIRLFL</b> LGLALKGSIF-----KGFLER <b>I IYQSLI</b>            | 490               |
| DANIO        | QMDSFPQYSQRMQ--HATCR <b>SIVKVF</b> VAMAVRGPVL-----WSFTSS <b>VVHQGLI</b>              | 503               |
| MILII        | QIDSFPLYARMQ--PICCR <b>SIVKVF</b> VALAGKGPVL-----WNFIST <b>VVHQGLI</b>               | 492               |
| BAMBOO       | QIDSFPLYSVRMQ--PVCCH <b>SIKLF</b> IALAGKGPVL-----WSFIST <b>VVHQGLI</b>               | 493               |
| XENOPUS      | QIDSFQYSLKMQ--SSCCK <b>AVLKVFL</b> SLAGKGPVL-----WSLIST <b>VVHQGLI</b>               | 508               |
| STERLET      | QIDSFQYSQRMQ--PVCCR <b>SILKVFI</b> ALAGKGPVL-----WSFIST <b>VVHQGLI</b>               | 497               |
| GAR          | QIDSFQYSQRMQ--PACCR <b>AIKVF</b> VAMAGKGPAL-----WSFIST <b>VVHQGVI</b>                | 492               |
| LATIMERIA    | QIDSFQYSQKMQ--PTCC <b>KSIVKV</b> LALAGKGPVL-----WSFIST <b>VVHQGLI</b>                | 489               |
| CAECIL       | QIDSFQYSVKMQ--SVCCR <b>SIVKVF</b> LALAGKGPVL-----WNFIST <b>VVHQGLI</b>               | 494               |
| SNAKE        | QIDSFQYSARMQ--TACCR <b>SIVKVFL</b> LALAAKGPVL-----WSFMST <b>VVHQGLI</b>              | 492               |
| CANARY       | QINSFPQYTEKMQ--PVCCH <b>SIKVF</b> LSLSGKGPVL-----WSFIST <b>VVHQGLI</b>               | 484               |
| OSTRICH      | QIDTFPQYSEKMQ--SVCCR <b>SIVKVFL</b> ALTGKGPIL-----WSFIST <b>VVHQGLI</b>              | 455               |
| GECKO        | QIDSFQYSIKMQ--STCHK <b>SIVKVFL</b> ALASKGPVL-----WSIMST <b>VVHQGLI</b>               | 492               |
| TURTLE       | QIDSFQYSVKMQ--SACCK <b>SIVKVFL</b> ALAGKGPVL-----WSFIST <b>VVHQGLV</b>               | 493               |
| ALLIGATOR    | QIDSFPRYSEKMQ--PVCCR <b>SIVKVFL</b> ALAGKGPVL-----WNFIST <b>VVHQGLI</b>              | 453               |
| PLATYPUS     | QIDSFQYSIKMQ--SACCK <b>AIKVF</b> LALAGKGPVL-----WNFIST <b>VVHQGLI</b>                | 488               |
| TASDEVIL     | QIDNFPQYSIKMQ--TICC <b>RAIKVF</b> LALAEKGPIL-----WNFIST <b>VVHQGLI</b>               | 489               |
| <b>HUMAN</b> | <b>QIDSFQYSPKMQ--LVCCR</b> <b>AIKVF</b> LALAAKGPVL----- <b>RNCIST</b> <b>VVHQGLI</b> | <b>488</b>        |
| MOUSE        | QIDSFQYSPKMQ--LVCC <b>KAIKLF</b> LALSEKGPVH-----WNCISA <b>VVHQGLI</b>                | 488               |
| CRASSO2      | LAENFPTIHQKQH--FFSV <b>KSLWVL</b> LITLMPKGEVF-----SQVLSG <b>FVFQMLI</b>              | 489               |
| POMACEA      | LLENIPTIYRGFH--FTCL <b>KGILHLL</b> IVLQSKGSTF-----NKVLSG <b>FVYQGLI</b>              | 485               |
| TRICHOPLAX   | LFENFPYVINELH--SLCY <b>KSLFELL</b> LALHSGGAAL-----KNFLSR <b>VVYQGLI</b>              | 484               |
| NEMATOSTELLA | LFESFPRLSKSAK--YLCH <b>KALVKML</b> INISAKGSVL-----KNFLSE <b>VVYQGLI</b>              | 490               |
| PRIAPULA     | LFGNVPLLRRESRLDHRAC <b>AVRVL</b> LALRSKRATQ-----RSLVKR <b>VVFQGLL</b>                | 494               |
| SOFTCORAL    | LIEKFPELGRGPQ--FICL <b>KAMLKLF</b> LALTTRGASL-----KSFLSE <b>IVYQGLI</b>              | 488               |
| PISTILLATA   | LFDKFAILNKGGK--FLCK <b>ALIRVL</b> FHLSSKGAIL-----RNFLSE <b>IVYQGLI</b>               | 493               |
| HEMICHOR     | LMENFPRFGKALH--YTCY <b>KSITAVL</b> VALSPKGATL-----RNFVSR <b>IVYQGLI</b>              | 491               |
| BELCHER      | LFENFPRLGKMH--LICQ <b>KAILKVL</b> LALVPKGATL-----RTFLSR <b>IVYQALI</b>               | 495               |
| STRONG       | VFGSYPHQARSSQ--WTSH <b>SAILQILL</b> IALSAGTSL-----QGFLSR <b>VVYQWIL</b>              | 493               |
| STARFISH     | QVSSYPRVPNKYQ--YLSH <b>QAILLVL</b> IALSSKGATL-----KNFLSR <b>VVYQALV</b>              | 491               |

.: :. :. :.

Supplementary Figure 9: Clustal Omega: DNA-PKcs alignment metazoan plus “putative archaeon”

|              |                                                                   | <b>RYG70451.1</b> |
|--------------|-------------------------------------------------------------------|-------------------|
| ARCHAEON     | RTLARKESTD-----HIAADHARLSSYSVFSVEEDRLVVFVYSSLWHALL                | 644               |
| MUDCRAB      | HTCSHAPEIDSLKKESELW-KESNDSEESGGKWEFGKKE-----AVTYKNYLPWKAIM        | 538               |
| SCORPION     | RTCSYPVRFIEIAREENMS-----GDNLELKNPR-----EITSKSYSSLWENLL            | 532               |
| SPONGE       | RSCSLPVVIEAVQGDSDAVVT-----AAPLADSNK-----VMSYLDYVQLWIQLI           | 538               |
| CAPITELLA    | RCSHPVIVLESQEAKSEN-----VDEVNLKV-----DVSYQDYLPWKALL                | 531               |
| DANIO        | RVCSKPVQLQSDERGVSSGV-----SQSEDSTLVRSGKWK-----VPSSKDYLELFKGLL      | 552               |
| MILII        | RVCSKPVLLPGEETGRSES--GL-QQQSASEVMWTGKWR-----VPSYKDYLDLFRSLL       | 543               |
| BAMBOO       | RVCSKPVLLPGEEMTKAEPWSSA-QQSLNNGMGTGKWR-----VPSYKDYLELFRSLL        | 546               |
| XENOPUS      | RVCSKPVVLAQDG--KEGSEAE---TAAATGEVRAGKWK-----VPTYKDYLDLFRNLL       | 557               |
| STERLET      | RVCSKPVVLTGEEGG---QGGG---QPVEKQVHTGKWK-----VPSYRDYLDLFRNLL        | 545               |
| GAR          | RVCSKPVLLTEEEGAAQGAEGG---RSAGAGQVRTGKWK-----VPSYRDYLDLFRSLL       | 543               |
| LATIMERIA    | RVCSKPVPLSTEGIGKGGLOQSEEEADPAAPGEVRTGKWK-----VPSYKDYLDLFRNLL      | 543               |
| CAECIL       | RVCSKPVTLGKEGSGKSGPGE---EPPVAEEVRIKWK-----VPTYKDYLDLFRSLL         | 545               |
| SNAKE        | RICSKPLVFSMDFGGKNIKSE---EYDSSGEVTRGKWK-----VPTYKDYLDLFRSLL        | 543               |
| CANARY       | RIFSKPITFSKDFSVKETSGETE---EAFEAGEVTRGKWK-----LPTYKDYLYLFRSLL      | 535               |
| OSTRICH      | RIFSKPITFSKEYFGKKTSGSE---ESPAAGEAGAKWK-----VPTYKDYLYLFRSLL        | 506               |
| GECKO        | RVCSKPLAFLRENSGTGVSASE---EHPASGEVRSKWK-----VPTYKDYLDLFRSLL        | 543               |
| TURTLE       | RVCSKPIITFSREIFGKEVSKLE---ESTTAGEVRTGKWK-----VPTYKDYLDLFRSLL      | 544               |
| ALLIGATOR    | RVCSKPIVFSREFDGGKASKSE---EPPAVGEVRTGKWK-----VPTYRDYLDLFRSLL       | 504               |
| PLATYPUS     | RVCSKPVVFLKEAYGRDASESD---DSSAFGEVVRGRWK-----VPTYKDYLDLFRSLL       | 539               |
| TASDEVIL     | RVCSKPVILQKEAFGKEVSESE---EYPSSGEVKTGKWK-----VPTCKDYLDLFRNLL       | 540               |
| <b>HUMAN</b> | <b>RICSKPVVLPKGP---ESESE---DHRASGEVRTGKWK-----VPTYKDYVDLFRHLL</b> | <b>535</b>        |
| MOUSE        | RICSKPVVLPKDV---ESRSD---NRSASEEVRTGRWK-----VPTYKDYVDLFRHLL        | 535               |
| CRASSO2      | RTCSHPPLIETEDMTES-----N--QSEQTGT-----KVTFKDFIELWDTLF              | 529               |
| POMACEA      | RTCSHPVVMGADENQEI-----STAETDLTVK-----QITYKDYLEVWVWGLL             | 527               |
| TRICHOPLAX   | RTCSHPVYVETDSDLNIS-----QDSVILETGP-----RISYKDYISLWKNLI             | 527               |
| NEMATOSTELLA | RTCSHPVLLDEGPDVVDKQ-----VGVVTGSRSD-----QVTFKDYLPWHEHML            | 533               |
| PRIAPULA     | STCSHPVAMETSSVFS-----QNADDVDDDFQERDPR-----NITYIDYMDMWRHLL         | 541               |
| SOFTCORAL    | RTCSHPVLLDEGVDAM-----EGVTEFDVR-----HISYKDYLELWECFL                | 528               |
| PISTILLATA   | RTCSHPVILKEVNGESTIME-----EREVYEGSTP-----NTSLKDYLELWEYLL           | 538               |
| HEMICHOR     | RTCSHPVVLEGEYDV-----S--GDE--TSDELLIDAR-----KVSYKDYLDLWNHLL        | 536               |
| BELCHER      | RTCSHPNVIEGVTAEDEDLPVA-SGEEGGEQQPQQPPVK-----RFSYRDYLELWGNLL       | 548               |
| STRONG       | RTCSFPVLLSEGGD-----E-GEEQRSDEMEIEQDSR-----RVSYSKSFMDLWTRLL        | 539               |
| STARFISH     | QTCSHPVVLDGSPSID--HPVL-GNDDQDTEADILADAR-----HITYKDYVKLWASLL       | 542               |
|              | :                                                                 | : :: ::           |

Supplementary Figure 9: Clustal Omega: DNA-PKcs alignment metazoan plus "putative archaeon"

|              |                                                                       | <b>RYG70451.1</b> |
|--------------|-----------------------------------------------------------------------|-------------------|
| ARCHAEON     | KPTDKTLRLFCLDMLGLSF-----LDVVKQRLVQWLFVSKCMSTIKSLQLTYSKAEELQ           | 698               |
| MUDCRAB      | MPEKVSIV-----KIPGV-----STTILTEISSKLYSEYITSTIEIAEKLDLSTFKQEEIET        | 590               |
| SCORPION     | YIVRNKEL-----NHIGI-----SLEDRHLLQLIYDEIISVVLTLKLLDLATTHSMQDSE          | 584               |
| SPONGE       | DYKCLKGM-----GMDP-----DLELRQSIHQLVYSEFIQSLNLILRKLDFTTASTTEDGI         | 589               |
| CAPITELLA    | TAGLKLKAL-----GQYNI-----TAEQHRVLSAIIYDELLSAMLKMISRDLSSNSTDSESQ        | 583               |
| DANIO        | DCENLKDT-----GFVDGAPAAKNYNLRDLNRHLYDALVQSVMKIVEKLDLSVQKVSAADE         | 608               |
| MILII        | NCGMKKEF-----GLV-DTLQMINLPLQSLNRLLYDEFIKSILKIEKLDLSVEKQONQREE         | 598               |
| BAMBOO       | DCGRMKES-----GLIYETFQMFDSPLKSLNRLLYDEFIKSVLKIEKLDLSVQKQSONEE          | 602               |
| XENOPUS      | RCDQLKDS-----IFSDEIFSTVNSPLQSLNRLLYDELMKSILKIEKLDLSLQKQDTGQE          | 613               |
| STERLET      | ECDKMKDT-----GFVDGAFDVRSSSLHSLNRLLYDELIKSIKIEKLDLSVQKQSADEQ           | 601               |
| GAR          | DCDLMKDF-----GFLEGVFESQSAPLQSLNRLLYDELVKSILKIEKLDLSVQKQNPDEL          | 599               |
| LATIMERIA    | ECDKQKDS-----ALVDETFGVNSPLQSLNRLLYDELIKSIKIEKLDLNVQKQKVGQDQ           | 599               |
| CAECIL       | DCDKMKES-----IFSDEVF-SVNSPLQSLNRLLYDELIKSVLKIEKLDLTVQKQSVGEQ          | 600               |
| SNAKE        | GCDTMKNI-----LLADEVCLTEYSPLQSLNHMLYDELIKSVIKIIDKLDLTVQKQONINEE        | 599               |
| CANARY       | SCDTMKES-----VFEDANFLTEKAQLQSLSRVLYDELIKSVLKIEKLDLTVQKLDISEQ          | 591               |
| ONSTRICH     | NCDTMKES-----VLEDENFLAANSALKSLSRLLYDELIKSVLKIEKLDLTVQKLVNEQ           | 562               |
| GECKO        | SCDTMKDS-----LLADETCLMANSPLQSLSRLLYDELIKSIKIEKLELTVQKQNVNDA           | 599               |
| TURTLE       | NCDTMKES-----VLADETFLLIANSPLLSNRLLYDELIKSIKIEKLDLTVQKLVNSEQ           | 600               |
| ALLIGATOR    | NCDAMKES-----VFADENFLTVNSPLQSLNRLLYDELIKSIKIEKLDLTVQKLVTFSEQ          | 560               |
| PLATYPUS     | NCDEMKDS-----QL-DETFLIVNSPLQSLNHLLYDELIKSVLKIVEKLDLNVQKQNTGEG         | 594               |
| TASDEVIL     | SCDQMKDS-----LLADETFLLVNSPLQSLNRLLYDELIKSIKIVEKLDLKLEKQNVGNQ          | 596               |
| <b>HUMAN</b> | <b>SSDQMMDS-----ILADEAFFSVNSSSES LNHLLYDEFVKSVLKIVEKLDLTLEIQTVGEQ</b> | <b>591</b>        |
| MOUSE        | GCDQMEDF-----ILGDETFVNSLKS LNHLLYDEFIRSVLKIVEKLDLTLEKQTVGEQ           | 591               |
| CRASSO2      | NSPRIKEF-----SVADI-----SVEVRLALTEAVYDELINSVLRMLGKLDLTSQSSTEVAQ        | 581               |
| POMACEA      | ESGKIKDL-----IQDGI-----GFAERDQLTHAVYNELMQAILKVISKLDLTSTTQRESE-        | 578               |
| TRICHOPLAX   | QATEIKGL-----TLITT-----DREHIIVQRSLYNELHSLQRILLKLDLTSSQOTTIE-          | 578               |
| NEMATOSTELLA | DKTKFKMY-----LLFQSLSLSDIEKRESLHELVEDELVGAILRIIHKLDLTSTKHGQODL         | 589               |
| PRIAPULA     | GSDKMKGL-----NELGV-----SMSDRKALTCVYDEIVTSLMKIVGKLDLSTSKSTDPSQ         | 593               |
| SOFTCORAL    | DGGQYKDQ-----SIMPK-----VSSLTQDIHRAIYDELIQAILKVAHKLNLSFRDQVETQD        | 580               |
| PISTILLATA   | DKDKLKDE-----SLLGK-----QLEERKVMHGLVYDEMIRGILRIIHKLDLSSSKGSSAQE        | 590               |
| HEMICHOR     | DSSQLRI-----TDIGL-----SPQDCKVLHNIYDELIAAIIRILGKLDLSSNKDGQLGN          | 587               |
| BELCHER      | DSSRLKEL-----SQWGV-----AVADRQAMHRMLYDELVTSLKVIDKLDLTTSKQVETGN         | 600               |
| STRONG       | DSKFIKTS-----EAHGS-----SYAERLNHTMIYNELIGGILKVLKLDLSSNKHNEEEA          | 591               |
| STARFISH     | DSTHVKEV-----QAMGM-----NYADRRKIHIIYDELIIFSILKILSKLDLTSNKDTTELQ        | 594               |

: : . . \*::

Supplementary Figure 9: Clustal Omega: DNA-PKcs alignment metazoan plus "putative archaeon"

|              |                                                               | <b>RYG70451.1</b> |
|--------------|---------------------------------------------------------------|-------------------|
| ARCHAEON     | D----V-----NNVGCLPDNIVDQDLFLNLVTFEILVTLLD                     | 731               |
| MUDCRAB      | N---DI-----TSDDGDVATSDPISGLSAKTPKDFQVYMNVIALLLEEVL---P        | 632               |
| SCORPION     | I---KD-----SNLKQFETSELYSTVSDPFYGLQLSKPKDFRVFMNIVDFCKDLF---I   | 632               |
| SPONGE       | MANEGEGGGG-----SGGGDPVITSDPVLGRQPAVPKDFQIFINLVELAKKVI---P     | 638               |
| CAPITELLA    | P---S-----TSEPALSDPSSDPLRGLHAVCPEDFILLTNLVELSRDLL---P         | 625               |
| DANIO        | V---Q-SD-A-----SAGIVLSSDPTANLMPNPKPKDFIAFINLVDFCSELL---P      | 650               |
| MILII        | E---GSGDVS-----NGNVIPTSDPAADLQPVKPKDFTAFVNLVQFSTELL---L       | 642               |
| BAMBOO       | G---GSGDVN-----SSIVIPTTDPANLQPTKPKDFTALFNLVEFCGEL---L         | 645               |
| XENOPUS      | D---D-GGIN-----NLLINATSDPAGNLYATKPKDFTAFVNLVEFCSEIL---P       | 656               |
| STERLET      | E---GRSDAS-----SSMLIPSSDPAANLQPSKPKDFTAFVNLVEFCSELL---M       | 645               |
| GAR          | E---ESDVS-----SGVVIPSSDPTAHLLPKPKDFTAFINLVEFCSELL---L         | 642               |
| LATIMERIA    | E---GETDPS-----STIIPTSDPAANLQPSKPKDFTAFINLVEFCRELL---P        | 643               |
| CAECIL       | Q---DASDED-----SALVIPTSDPAANLQPTKPKDFTAFVNLVEFCREIL---P       | 644               |
| SNAKE        | K---DGSEGD-----AHLAIPSTSDPAANLQPSKPKDYSAFINLVEFCREIL---P      | 643               |
| CANARY       | ---DGNAGD-----SALVGPSSDPAANLQPTKPIDFIAFINLVEFCREIL---P        | 634               |
| OSTRICH      | ---DEDET-----SALVVPTSDPASNLQPAKPTDFIAFINLVEFCREIL---P         | 605               |
| GECKO        | K---DANEAD-----ADLTIPTSDPAANLHPTKPKDFTAFINLVEFCREIL---P       | 643               |
| TURTLE       | ---DENEAG-----SDLVVPSTDPASNLQPTKPKDFTAFVNLVEFCREIL---P        | 643               |
| ALLIGATOR    | ---AESESG-----DVMIIIPSSDPASNLQPAKPTDFIAFINLVEFCREIL---P       | 603               |
| PLATYPUS     | ---DESEVS-----NLWVIPTSDPVANLHPSKPKDFTAFINLVEFCRDIL---P        | 637               |
| TASDEVIL     | E---DESEAS-----GVWVIPTSDPTANLHPAKPKDFTAFINLVEFCREIL---P       | 640               |
| <b>HUMAN</b> | <b>E---NGDEAP-----GVWMIPTSDPAANLHPAKPKDFAFINLVEFCREIL---P</b> | <b>635</b>        |
| MOUSE        | E---DGST-A-----DVWVIPTSDPAANLHPAKPSDFSALINLVEFCREIL---P       | 634               |
| CRASSO2      | Q---QEGPTS-----SNESEDVSSDPLHGMQPNKPKDFQIFINLVDFCREML---P      | 626               |
| POMACEA      | ---TSGTEE-----EKSDITQSGDPVHEIEANRPMDFQVLINLVDFSRDLL---V       | 622               |
| TRICHOPLAX   | -----EETQSSEGTSNPVAGLKPNVVKDFQVFINIVDFTKALL---P               | 617               |
| NEMATOSTELLA | Q---VR-----DQPQEEQEETSDPVAGLQPRVQKDFLVFINLVDFCKALL---P        | 633               |
| PRIAPULA     | V---HDGSGGASSE-----SPDAYSGGSDFADGLVPCRPKDFLVFFNLVEFTKDLL---S  | 642               |
| SOFTCORAL    | E---DLQTEQ--PSSPDAPLLTTSGGTTDPISGIQPEAPKDFQIFINLVEFSRKIL---L  | 632               |
| PISTILLATA   | G---DILGKSSASDVPASATADKEVLSLSDPVPGLQPKVPKDFLIFISLIEFCRCVL---P | 644               |
| HEMICHOR     | E---LSADPE--PGTSDGRSSPVTDLSSDPSGLTPSKPKDFQIFINLVEFCRDFL---P   | 639               |
| BELCHER      | E---ELTADV--SG-----SQDGTTSDFPAGLQAAKPRDFVVFINVVDFCRDLL---P    | 645               |
| STRONG       | S---TSGGVT--SD-----LEGNTSSDPLEGLQPTKPKDFQVFINLVDFTKELL---P    | 636               |
| STARFISH     | ---DQVAVD--SD-----STEDASSDPLHGLHATKPKDFQIFVNLVDFCRDLL---P     | 638               |

\* . : : .

Supplementary Figure 9: Clustal Omega: DNA-PKcs alignment metazoan plus "putative archaeon"

|              |                                                                                                                                                                                                             | <b>RYG70451.1</b> |
|--------------|-------------------------------------------------------------------------------------------------------------------------------------------------------------------------------------------------------------|-------------------|
| ARCHAEON     | KQDTYNYADFV <del>V</del> FV-- <del>N</del> VMEMSQKLP <del>L</del> LSG <del>F</del> YRMLSCLLIHLEDL-----LACG                                                                                                  | 777               |
| MUDCRAB      | LQYEDQLQGHVSR <del>L</del> CWF <del>F</del> I <del>R</del> CSSE <del>Q</del> PLVSAHYTSLTTILVCAQKMRYFEKTK-----                                                                                               | 684               |
| SCORPION     | SKHNELFEKWILIFGLE <del>I</del> I <del>Q</del> FINKN <del>P</del> YISG <del>F</del> YK <del>L</del> ITVCLTICKKTRYFQHVKKLKTKEE-                                                                               | 691               |
| SPONGE       | SVSLSLFTPWILTF <del>S</del> QEV <del>V</del> SLATRY <del>P</del> LVSG <del>F</del> YK <del>L</del> ITVCL <del>S</del> ICNKTHFFDVHDL <del>S</del> GQGTGD                                                     | 698               |
| CAPITELLA    | VTQTQKFSSW <del>V</del> FPFGH <del>L</del> ILQSS <del>K</del> L <del>P</del> LVSG <del>L</del> YK <del>M</del> LTVCMQVASQISYFKEMNRQLKIETS                                                                   | 685               |
| DANIO        | SRNPEYFAQW <del>M</del> HPLCHE <del>L</del> ILQ <del>S</del> IR <del>F</del> PLVSG <del>F</del> YK <del>L</del> LSLSMGIAKKTQYFQDVKQCP-KQVG                                                                  | 709               |
| MILII        | ERHEEFDQW <del>V</del> YRFGYEL <del>I</del> ILRST <del>Q</del> F <del>P</del> LVSG <del>F</del> YK <del>L</del> LSATMKI <del>A</del> KKIN <del>Y</del> FKGVSTNTWKQCH                                        | 702               |
| BAMBOO       | EKHTDFFEHW <del>V</del> YRFGHE <del>L</del> ILRST <del>Q</del> F <del>P</del> LVSG <del>F</del> YK <del>L</del> LSVTMKI <del>A</del> RKIKYFEGVNP <del>K</del> TRKQCP                                        | 705               |
| XENOPUS      | KEHIEYFESW <del>V</del> YVFGYEL <del>V</del> LQSTR <del>L</del> PLISG <del>F</del> YK <del>L</del> LSVVMKNAKKSRYFEGFTSKIYKKAP                                                                               | 716               |
| STERLET      | KEHVDFFEQW <del>V</del> YGLGHE <del>L</del> ILQSTR <del>F</del> PLVSG <del>F</del> YK <del>L</del> LSVSMKI <del>A</del> KRIKYFQGVSPRSCKTSP                                                                  | 705               |
| GAR          | KKHVEFFEQW <del>V</del> YPLGHE <del>I</del> ILQSTR <del>F</del> PLVSG <del>F</del> YK <del>L</del> LSVAMKI <del>A</del> KRIKYFKGVSPKSFQPNP                                                                  | 702               |
| LATIMERIA    | EKHVEFFEPW <del>M</del> YGF <del>G</del> HE <del>V</del> ILQSTR <del>L</del> PLVSG <del>F</del> YK <del>L</del> LSVSMKI <del>A</del> RKIKYFEGVSSKSKQNS                                                      | 703               |
| CAECIL       | EKHIEFFE <del>I</del> W <del>V</del> YTFGYEL <del>I</del> ILQSTR <del>L</del> PLISG <del>F</del> YK <del>L</del> LSVAMKNAKRTKYFEGVSPKSHKKCP                                                                 | 704               |
| SNAKE        | DKHIKYFEPW <del>M</del> YSFGYEL <del>I</del> IQATH <del>L</del> PFISG <del>F</del> YK <del>L</del> LSIAMKI <del>A</del> KKTKYFAGVSP <del>E</del> STKKYP                                                     | 703               |
| CANARY       | EKHVEYFHPW <del>V</del> YSGYEL <del>I</del> IVHSTR <del>L</del> PLISG <del>F</del> YK <del>L</del> LSVTMKI <del>A</del> KRIKYFEDISPRSLRRCP                                                                  | 694               |
| OSTRICH      | EKHVEYFNPW <del>V</del> YSGYEL <del>I</del> IHSTR <del>L</del> PLISG <del>F</del> YK <del>L</del> LSVAMKI <del>A</del> KRIKYFEGVSPKSLRKCP                                                                   | 665               |
| GECKO        | EKHIEYFEPW <del>V</del> YSGYEL <del>I</del> IQSTR <del>S</del> PFISG <del>F</del> YK <del>L</del> LSIAMKI <del>A</del> KRIKYFEGVAPKSKKKCP                                                                   | 703               |
| TURTLE       | EKHVEFFEPW <del>M</del> YSFGYEL <del>I</del> VQSTR <del>L</del> PLISG <del>F</del> YK <del>L</del> LSVAMKI <del>A</del> KRIKYFEGVSPKSYQKCP                                                                  | 703               |
| ALLIGATOR    | KKHLEYFKQW <del>V</del> YSGYEL <del>I</del> IQSTR <del>L</del> PLISG <del>F</del> YK <del>L</del> LSVVMKI <del>V</del> KKIKYFEDVSPGTQKKYP                                                                   | 663               |
| PLATYPUS     | EKHVQFFEPW <del>V</del> YSGYEL <del>I</del> ILQSTR <del>L</del> PLISG <del>F</del> YK <del>L</del> LSIAIRNAKMKYFEGVSPRSLKKSP                                                                                | 697               |
| TASDEVIL     | EKHIQYFEPW <del>I</del> YSFGYEL <del>I</del> ILQSTR <del>L</del> PLISG <del>F</del> YK <del>L</del> LSIAAIRNAK <del>L</del> RYFEGLSPKSHKKSP                                                                 | 700               |
| <b>HUMAN</b> | <b>EKQAEFFEPW<del>V</del>YSFSYEL<del>I</del>ILQSTR<del>L</del>PLISG<del>F</del>YK<del>L</del>LSITV<del>R</del>NAK<del>K</del>IKYFEGVSPKSLKHSP</b>                                                           | <b>695</b>        |
| MOUSE        | RKHVGGFFEPW <del>V</del> YSFAYEL <del>I</del> ILQSTR <del>L</del> PLISG <del>F</del> YK <del>L</del> LSIAVKNARKIKYFEGISPKSLKHSP                                                                             | 694               |
| CRASSO2      | EKHYKMF <del>G</del> KLFLFSHT <del>L</del> ILQST <del>E</del> K <del>P</del> LVSG <del>Y</del> YK <del>L</del> LAVSMKIANKLNYFQGMVSLSPVKK-                                                                   | 685               |
| POMACEA      | PKHFQYFEKW <del>V</del> FTFTHT <del>V</del> VQST <del>E</del> F <del>P</del> LVSG <del>F</del> YK <del>L</del> LAVTMKIANKLEYFKDIAVENSFKK-                                                                   | 681               |
| TRICHOPLAX   | TTRTEFFLPW <del>I</del> FPFGKN <del>L</del> VLLSTR <del>L</del> PLVSG <del>F</del> YK <del>L</del> LEICMTISSLSYFEDLN <del>I</del> ETVTKCT                                                                   | 677               |
| NEMATOSTELLA | GQSTDSFGRW <del>V</del> YVFG <del>R</del> D <del>L</del> IVSSSR <del>F</del> PVSG <del>F</del> YK <del>L</del> LEVCMKICKRLRFFQYEVTA-----                                                                    | 687               |
| PRIAPULA     | TNQTALFRRW <del>I</del> YTYGHE <del>V</del> ILLSTR <del>W</del> PVSG <del>L</del> YK <del>L</del> ITVCL <del>S</del> ICSSLQYFKAMRKV <del>N</del> DSQLH                                                      | 702               |
| SOFTCORAL    | KT <del>K</del> T <del>K</del> W <del>F</del> ENW <del>I</del> YTFG <del>K</del> ELV <del>V</del> LSAR <del>F</del> PLVSG <del>F</del> YK <del>L</del> L <del>D</del> IVMKISRKLDYFKGMTL <del>K</del> DVSTGC | 692               |
| PISTILLATA   | NYCVTLFERW <del>I</del> YMF <del>C</del> RD <del>I</del> IIMSSR <del>F</del> PVSG <del>F</del> YK <del>L</del> LEVCMK <del>M</del> CEKLSFFKN <del>I</del> KA <del>E</del> KPDLK-                            | 703               |
| HEMICHOR     | KRC <del>P</del> Y <del>F</del> ERW <del>V</del> YTFGHE <del>V</del> IVHSTR <del>L</del> PLVSG <del>F</del> YK <del>L</del> LSVCM <del>T</del> ISQ <del>N</del> IGYFQGINENAKVAVP                            | 699               |
| BELCHER      | HHHPEYFQRW <del>V</del> FTVGHAL <del>I</del> LHSTR <del>L</del> PLVSG <del>F</del> YK <del>L</del> LSVCM <del>T</del> ICTKVKYFKDLDTK <del>L</del> LSFS-                                                     | 704               |
| STRONG       | TRQIHLFD <del>P</del> W <del>V</del> YRFGHE <del>L</del> ILQSS <del>Q</del> L <del>P</del> LVSG <del>F</del> YK <del>L</del> L <del>T</del> ICMTMSR <del>K</del> TAFFKEVNP <del>N</del> VTFRTE              | 696               |
| STARFISH     | ANQPALFKQW <del>V</del> YRFGHE <del>V</del> ILLSC <del>R</del> L <del>P</del> LVSG <del>F</del> YK <del>L</del> L <del>T</del> VCMNICTQIQFFK <del>I</del> KPSDLSSQ-                                         | 697               |
|              | :        .:        . * : * . *        :                                                                                                                                                                     |                   |

Supplementary Figure 9: Clustal Omega: DNA-PKcs alignment metazoan plus "putative archaeon"

|              |                                                |                                    | <b>RYG70451.1</b>   |
|--------------|------------------------------------------------|------------------------------------|---------------------|
| ARCHAEON     | IH-----                                        | ANNEQASVVSCMSQISIFVMK----          | LQENLVASPNNDYN 813  |
| MUDCRAB      | -----                                          | DPEVETLIHLITSYVKD-----             | VLQRCRQLR 710       |
| SCORPION     | ----ISM-----                                   | SEKDCLIAFELFAKFSRE-----            | VVIYLQQFK 721       |
| SPONGE       | --DDVAM-----                                   | ETEERTDRQSCYFLFSSFIKE-----         | VVVMQYYK 733        |
| CAPITELLA    | DS--IKMEMDE-----                               | EFRTSTAQEEACFMLFTKFAKE-----        | VMTRLRQYK 725       |
| DANIO        | -----                                          | GSTMENACFSLLAKEFGKE-----           | VCVRMKQYK 736       |
| MILII        | -----                                          | TDPEKCAFALFGKFGKE-----             | VTIRMKQYK 729       |
| BAMBOO       | -----                                          | KNPEKFACFALFGKFGKE-----            | VAIRMKQYK 732       |
| XENOPUS      | -----                                          | EDPERLSCFALFAKFGKE-----            | VSSKIRQFK 743       |
| STERLET      | -----                                          | EDPKYACFALFAKFGKEVSTILGKEVSVRMKQYK | 740                 |
| GAR          | -----                                          | QDPEKYACFALFAKFGKE-----            | VSVRMKQYK 729       |
| LATIMERIA    | -----                                          | LDPEKYACFALFAKFGKE-----            | VCARMKQYK 730       |
| CAECIL       | -----                                          | KDPERFACFALFAKFGKE-----            | VSAMKQYK 731        |
| SNAKE        | -----                                          | EDPERSSCFALFSKFGKE-----            | VTTMKQYK 730        |
| CANARY       | -----                                          | EDPEKSSCFALFVKFGKE-----            | VAAKMKQYK 721       |
| OSTRICH      | -----                                          | EDPEKSSCFALFLKFGKE-----            | VTAKMKQYK 692       |
| GECKO        | -----                                          | ENPEKSSCFALFAKFGKE-----            | VTAKMKQYK 730       |
| TURTLE       | -----                                          | DDPEKSSCFALFAKFGKE-----            | VTAKMKQYK 730       |
| ALLIGATOR    | -----                                          | EDPEKSSCFALFAKFGKE-----            | VAARMKQYK 690       |
| PLATYPUS     | -----                                          | EDPEKYSCFALFAKFGKE-----            | VAVMKQYK 724        |
| TASDEVIL     | -----                                          | EDPEKYSCFALFAKFGKE-----            | VSIKMKQYK 727       |
| <b>HUMAN</b> | -----                                          | <b>EDPEKYSCFALFVKFGKE-----</b>     | <b>VAVMKQYK 722</b> |
| MOUSE        | -----                                          | EDTEKYSCFALFAKFGKE-----            | VSVKMKQYK 721       |
| CRASSO2      | --EVKMEVDS-----                                | DQKADIHQRATCFQLIQKFTKE-----        | VLVRMKQYK 724       |
| POMACEA      | ---EEQMDVDE-----                               | TGIDGQTEKHLTYILIKKFSSE-----        | VLVRMKKFH 720       |
| TRICHOPLAX   | IN-----                                        | AAAEAESIDKYLCYLLYYKFYKE-----       | VLVRLKQYK 711       |
| NEMATOSTELLA | -D-----                                        | DMEIVDTSDCNTCFILFRKFIKE-----       | VLIKMKQFK 720       |
| PRIAPULA     | ---SEAMET-----                                 | DSPDAVDNAEILNCFTLFKKFSKE-----      | VLVCLKMFR 741       |
| SOFTCORAL    | VD---DM-----                                   | ETDQLDFSDCRNCFILFHKFAME-----       | VVVRMKQYK 728       |
| PISTILLATA   | ---NENL-----                                   | NLEIVDTSDCMKCFVLFHKFTKE-----       | IVVRMQYK 739        |
| HEMICHOR     | RHIEEKAS-----                                  | TKDMCTLADKVAAFHLFKKFTKE-----       | VLIRLKQYK 739       |
| BELCHER      | ---EESMDTEG-----                               | RDRPSEGQACFTLFRKFVKE-----          | VLVRLKQYK 741       |
| STRONG       | VNEEPMDVDDSESIATRTPSNVLSLSDKQACFILFSKFSKE----- |                                    | VLIRLKQYK 748       |
| STARFISH     | ---EDSMDIDL-----                               | NFSSSSSCVSASDRICFTLFAKFSKE-----    | VLVRLKQYK 741       |

: . : . .

Supplementary Figure 9: Clustal Omega: DNA-PKcs alignment metazoan plus “putative archaeon”

|              |                                                                         | <b>RYG70451.1</b> |
|--------------|-------------------------------------------------------------------------|-------------------|
| ARCHAEON     | NELLQSIKVVILSLPIECLSIDCM-----YITLHISLSSNIHLNKCIAMLNKHFTFDPK             | 867               |
| MUDCRAB      | DQLLASCLTLILKLPVCIVIEIFPRLIVPLQMALHLGVSYLPLAEVCI AALCKWTHILPS           | 770               |
| SCORPION     | DELLASCLIEVILSLPTEIVESEINILIPAVQISLQLGLSYLPLAMSCLEDALETWLYSLPS          | 781               |
| SPONGE       | DDLASCLHLILVLPKEMVVSDFKELIPA I KLA LRIGMGYLP LAKSVMEALEKWTLYIVE         | 793               |
| CAPITELLA    | DDLASCLGFILALPREI I ALDVTTFVPALQRSLEIGRSYLP LARTSLNLTLESWSKSLPP         | 785               |
| DANIO        | DELLAACLMFILSLHPGMVALDIKAYIPALQAALRLGLSHAPLATAALDALESWSSFIPA            | 796               |
| MILII        | DELLVSCLNFVLSLPHDI I ELDIKAYIPALQA AFKLGLSHTPLADAGLDALEDWSAHIPK         | 789               |
| BAMBOO       | DELLASCLTFVLSLPHYDI I ELDIKTFIPALQTA FKLGLSHIPLADAGLDALEHWSTRISK        | 792               |
| XENOPUS      | DELLASCLTFVLSLPHDI I MMDIKAYIPALQTA FKLGLSYLP LADVGLNALQYWSTNIPS        | 803               |
| STERLET      | DELLASCLTFVLSLPHDI I VALDIKAYIPALQNSFKLGLSHTPLANTGLYALENWSQFIPK         | 800               |
| GAR          | DELLASCLTFVLSLHHD I VALDIKAYVPALQTA LKLGLSHTPLASAALDALEEWSSRISQ         | 789               |
| LATIMERIA    | DELLASCLGFILSLPHT I VELDVKAYIPALQMAFKLGLSYTP LADSGLDALEEWSNRIPK         | 790               |
| CAECIL       | DELLASCLIFILSLPHDI I MLDIKAYIPALQTA FKLGLSYSP LADAGLDALEDWSAYIPQ        | 791               |
| SNAKE        | DELLASCLTFVLSLPHYNI I MLDIKAYIPALQNAFKLGLSYTPMADVALDALEDWSSYIPR         | 790               |
| CANARY       | DELLASCLIFLLSLPHDI I MLDIKAYIPALQNAFKLGLSCTPMADLGLDALEDWSAHIPR          | 781               |
| OSTRICH      | DELLASCLFLLSLPPDI I MLDIKAYIPALQNAFKLGLSYTPMADLGLDALEDWSAHIPK           | 752               |
| GECKO        | DELLASCLIFVLSLPHDI I MLDIKAYIPALQNAFKLGLSYTPMAEVALDALEDWSAHIPR          | 790               |
| TURTLE       | DELLASCLTFVLSLPHDI I MLDIKAYIPALQNAFKLGLSYTPMADEGLDALEDWSAYIPK          | 790               |
| ALLIGATOR    | DELLASCLTFVLSLPHDI I MLDIKAYVPALQNAFKLGLSYTPMADVALSALEDWSSHIPK          | 750               |
| PLATYPUS     | DELLASCLTFVLSLPHDI I MLDIKAYIPALQMAFKLGLSYPP LADVGLNALLEEWSIYIPR        | 784               |
| TASDEVIL     | DELLASCLNFVLSLPHDI I ELDIKAYVPALQMAFKLGLSYTP LAEVGLNALLEEWSLYIPK        | 787               |
| <b>HUMAN</b> | <b>DELLASCLTFLLSLPHNI I ELDVRAYVPALQMAFKLGLSYTP LAEVGLNALLEEWSIYIDR</b> | <b>782</b>        |
| MOUSE        | DELLASCLTFVLSLPHDI I ELDVRAYVPALQMAFKLGLSHMP LAEIGLHALKEWSVHIDK         | 781               |
| CRASSO2      | DDLAACTLFILTLPK EIVSEQMSSVPAIQLTLSIGLGYLP LAMIALDALDYWSDTLPA            | 784               |
| POMACEA      | DDLASCLTLILTLPK EIIAQQMSKIVPAIQLTFSVGLSYLP LAEVGLDSL VWWSQVLPP          | 780               |
| TRICHOPLAX   | DDLHVSCLSLILALPYQLIQDDMALIIPA I KVSMNIGLSYLP LANAADALERWSSDLPO          | 771               |
| NEMATOSTELLA | EDLLSCLSLVLSLPHYE I VAVDVAAIVPALELTFKLGLSYLP LAQAGLAALEEWNASLPG         | 780               |
| PRIAPULA     | GDLVACLQLVMALPHYE I VVDIVPEIVPAVQVALKIGLSYPPMAHTTLDALEMWVANLPA          | 801               |
| SOFTCORAL    | DDLKSSCLQLVLSLPHNELVLCIDII I PTLKTA FKLGLSYLP LAEAAALDALDTWTAELPS       | 788               |
| PISTILLATA   | DDLFSCLLVVLSLPLELVTLDLVSSVAALKLTFKLGLSYTP LAEAGLDALESWTTALPA            | 799               |
| HEMICHOR     | DDLASCLFLVLALPHEI I ASDVAAIVPALQTTFRIGLGYLP LAHAGLDALETWAFRLQH          | 799               |
| BELCHER      | DDLASCLLLVLSLPHQIVQSEISTLVPA LQTTFRGLGSYLP LAHAGLDALEERWLLNLPR          | 801               |
| STRONG       | DDLASCLFLILSLPHQVVENQVHDVIPALKTA FKLGLSYLP LAESGLSALQAWIRYIPS           | 808               |
| STARFISH     | DDLASCLLLVLSLPHQIVQAEVAHLVPA LQMTFQLGLSYLP LAETGLEALERWMLHLLP           | 801               |
|              | : * : : . : * : : : : . : *                                             |                   |

Supplementary Figure 9: Clustal Omega: DNA-PKcs alignment metazoan plus "putative archaeon"

|              |                                                                   | <b>RYG70451.1</b> |
|--------------|-------------------------------------------------------------------|-------------------|
| ARCHAEON     | ----KFLNGTATSLLPLLSKYIVPISMENLSVNERHE-----YVSI GRK-KLKTH          | 912               |
| MUDCRAB      | ----DILHQHLPVAVLPLLLPYLRSKETGEVEVQTRVITVKMA-----YANQRR--KVDQK     | 819               |
| SCORPION     | ----ELLKEHYCKLLPSLNDYFLASDNISLQPLKNIHTFT-----KQSLVVKKKLPLK        | 830               |
| SPONGE       | SDKMDTLQCLVNEILPLLDAYLKATSVQLKEEEDGGRGKQ-----YATKRYA---RMK        | 843               |
| CAPITELLA    | ----DVMKPFYEQLLPYLDAYLTSSADEKNDTL-----SLVQKDPMKKQGKKKIPVK         | 833               |
| DANIO        | ----AILQPHYTDILPHLDGYLKTTSSEKDDS---NMEVTF--VSTGSSKGYG-QVLLR       | 846               |
| MILII        | ----HI IQPHYKDILPHLDGYLKTAAF-NEAQN---NWEGMN--INNPSRKGGG-KVLFH     | 838               |
| BAMBOO       | ----HVI EPYYKDILPHLDGYLKTAAAS-NEFES---NWEMMS--MNT-SSKGGN-KVLIR    | 840               |
| XENOPUS      | ----DILKPYKDIIPLLDGYLTNLSSTNESLS---TLDMVR--ISRSLHKGFN-KQLIQ       | 853               |
| STERLET      | ----YVMQPHYKDILPYLDGFLKTASNDDEEQN---NWEVMS--LSRSTKGYG-RVLMR       | 850               |
| GAR          | ----PLIQPLYRDVLPCLDGYLKTAAASNGSDQN---TWEVMC--LSSGAEKGYG-RVLLR     | 839               |
| LATIMERIA    | ----WVLQPYKELPCLDGYLKTSSISAGDTPS---SWEVLR--LSRASQKGDH-KVLIR       | 840               |
| CAECIL       | ----YVIQPHYSEILPYLDGYLKTASSADEYQN---SWEVMR--LSRAAQKGFN-RFLVQ      | 841               |
| SNAKE        | ----NI IQPYKDIVPCLDSYLKTASSTDESQN---NLEVKK--LSKAIQKGMN-KVVIQ      | 840               |
| CANARY       | ----HMQPYKDVLPCLDGYLKSSTSTVESQN---NWEVRK--LSQAAQKGRN-KVVIQ        | 831               |
| ONSTRICH     | ----HIMQPYKDVLPCLDGYLKNASSTVEPQD---NWEVRK--ISRAAQKGFN-KVVIQ       | 802               |
| GECKO        | ----YTMQPYKDIIPCLDGYLKTSTSTDDSQN---NWEVKK--LSQAVQKGSN-KVVIQ       | 840               |
| TURTLE       | ----HIMQPYKDVLPCLDGYLKTGSADESQN---NWEVRK--LSRAAQKGFN-KVVIQ        | 840               |
| ALLIGATOR    | ----NIMQPYKDVLPCLDGYLKTATSPDEFQN---NWEVKK--LSQAVQKGFN-KVVIQ       | 800               |
| PLATYPUS     | ----HVIQPYKDIIPCLDSYLKTALSDETKN---NMEVTM--LSRATQKGFN-KVVVR        | 834               |
| TASDEVIL     | ----HTIQPYKDIIPCLDSYLKTALSDDNKD---NEEVTV--LSRAAQKGFN-KVVIK        | 837               |
| <b>HUMAN</b> | <b>----HVMQPYKDIIPCLDGYLKTALSDETKN---NWEVSA--LSRAAQKGFN-KVVVK</b> | <b>832</b>        |
| MOUSE        | ----SILQPYKDIIPCLDGYLNTSTLSDETKS---HWGLSA--LSRAAQKGFN-RHVVK       | 831               |
| CRASSO2      | ----SVIRPFYPQILPCLDSYLKTMDQGAD----DVSNTMEM-NKSKSGKGRK-KLPVR       | 834               |
| POMACEA      | ----EVLAPHYANILPCLDSYLKTVDTGAE----DVSVELTVTVSSSKSKYRGK-KLPVR      | 831               |
| TRICHOPLAX   | ----NIIGPYFSDILPCFDDYLKSSADTTETLVEDSSKALK-----ARTGKAKKLP--        | 819               |
| NEMATOSTELLA | ----DVLRRHLRNILPYLDGYLKSATDAVEEQDQVSRRTATL-RSTYSRLGKILSLYYI       | 835               |
| PRIAPULA     | ----DVMQPYKQILPHLDGYLKTTEGAD----SVPTPTVAI-TSANATRGRK-KIPVK        | 850               |
| SOFTCORAL    | ----EILHPYLREVLPLDGYLKTASELETSNEKETKL-----RSRKS GK----TK          | 831               |
| PISTILLATA   | ----DKLKPFLREILQCLDGYLTTLGDIQLHNE---CNTIVLI-TSSHHTSRGR-KLPLK      | 850               |
| HEMICHOR     | ----NALQPYKDIIPCLDGYLKTVDSTNAENA---SSQTVSL-TMTRTGKRRN-KIPIR       | 850               |
| BELCHER      | ----SALEPHFPHILPYLDSYLQTAADTGSSSSSD-GFQTVSL-TAASSTRGKR-KIPVK      | 854               |
| STRONG       | ----DVLKPYAQLVLPCLDGYLGAGSGSEDEGS---RPEVLVI-QTASSRVGRR-RIPSK      | 859               |
| STARFISH     | ----DSLQPHLKVILPLLDGYLRGITITQGSDAADVQTVTMAS-ASSSGRAGKR-KLPAK      | 855               |

:        ::    :    ::

Supplementary Figure 9: Clustal Omega: DNA-PKcs alignment metazoan plus “putative archaeon”

|              |                                                                      | <b>RYG70451.1</b> |
|--------------|----------------------------------------------------------------------|-------------------|
| ARCHAEON     | LHSSNI-V----NSLQKQQVTTTEQILLFLGKLGHHNQAMLQ---SPSEVIQDSL MWSAET       | 964               |
| MUDCRAB      | KI-----LASKQVDATAMKRVQSLILQLIGGLDPSLQGYVIP-QDADSLAAAAVCWDSQ-         | 872               |
| SCORPION     | ISQYKK- IKQTDLHESELIKVQHRILRF LGSVGNQYNFAMIS-ADKIKIHEVAVAWDINK       | 888               |
| SPONGE       | MVEKWS-EGLHQGSRDDITSVRRRILL LLSLGGV VNESLSKVP----SQHSLVSWDS-         | 897               |
| CAPITELLA    | LLKQTM-FDAEKGKESELKEIQKCVLL LLSLGGG SINHALVFGQTA--NPPDLVAVDSD-       | 889               |
| DANIO        | LLKKSK-R-FSLGDESPIAAVRRRVVRL LHLGGQLNRS LVTAVSAEDMMKRFVAVDCE-        | 903               |
| MILII        | HTKKSK-E-FLVSEDSAITAVRRRIVRL LLSLGGQNNRS LVTAVSAEEMMKRCIAVVTE-       | 895               |
| BAMBOO       | RLKNAR-D-LSMSEETPAAAVKRVVRL LLSLGGQINRS LVAATSSSEEMKKCVAVVAE-        | 897               |
| XENOPUS      | QLKRMK-T-LSVKEESSLTAVRN RVRL LLSLGGQINRS LVTAASTEEMIKRHVSWDTE-       | 910               |
| STERLET      | LLKKAK-R-FSLTEDSPTALVRRRVVRL LHLGGQINRS LVTATS AEEMKKFVAVDSE-        | 907               |
| GAR          | LLKRTK-H-LSMAEDSPSAVRRRVVRL LHLGGQLNRS LVTAA SAEEMKKFVAVDSE-         | 896               |
| LATIMERIA    | LLKKAK-A-VSLNEDSSLGAVRGRVRL LLSLGGQVNRSLVTAASSEEMKKFVSWDTE-          | 897               |
| CAECIL       | RLKTK-T-LSLDQDVSLASIRNRVQIL LLSLGGQINRS LVTASCAEEMKKYVSWDTE-         | 898               |
| SNAKE        | HLKKSK-N-LELEADPSLEAVRARVRL LGLGGQINRH LITGTS AEEMKKFVSWDIE-         | 897               |
| CANARY       | RIRRAK-T-LSVDNSPSLQAVRTRVAR LLSLGGQINRH LITATS AEEMKKCVSWDTE-        | 888               |
| OSTRICH      | HLRRAK-T-SL-VGDP SLEAVRTRVAR LLSLGGQINRH LITATS AEEMKKCVSWDTE-       | 858               |
| GECKO        | RLKKAK-S-LALEEDHSLEAIRMVACL LLSLGGQINRN LVTAA SAEEMKKFVSWDTE-        | 897               |
| TURTLE       | RLKKAK-T-LSLEDNLSLEAVRTRVRL LLSLGGQINRN LVTAA SAEEMKKFVSWDTE-        | 897               |
| ALLIGATOR    | RLRKA K-A-LSLNEDLSLEAMRSRVVQL LLSLGGQVNRSLVTAAS EEMKKFVSWDSE-        | 857               |
| PLATYPUS     | HLKKA K-A-TAPVEDLSLESVTRVRL LLSLGGQINRN LVTAA SAEEMKKCVAVDTE-        | 891               |
| TASDEVIL     | HLKKSK-T-ILSDAEMSLEAVRAQVIRV LLSLGGQINRN LVTAA SDEIMKKCLAVDSE-       | 894               |
| <b>HUMAN</b> | <b>HLKTK-N-LSSNEAISLEEIRIRVVQML LLSLGGQINKNLLTVTSSDEMMKSYVAVDRE-</b> | <b>889</b>        |
| MOUSE        | HLKRTR-N-SSPDEALSLEEIRIKVVQIL LLSLGGQINKSLVTATS-GERMKKYVAVDAE-       | 887               |
| CRASSO2      | ILKGPK-TDSKQVFETQLAKVKQVM TYLGR LGGEVNHALLS-G--SDVCEEAIWDAE-         | 889               |
| POMACEA      | LVKERKPVLDLKGYESQLSVVKQIVTY LLSLGGSMNFALLA-RREEEISRRAIWDTE-          | 889               |
| TRICHOPLAX   | --VKVV-NPTGGSKDSPLAQVRLRIVQL LGR LGGNTNSLVIR-KGNDDGSSQAVAVDNH-       | 874               |
| NEMATOSTELLA | DFVSKR-NILPQVGESSLV TIRVQILRL LQG LGGHTNLC LLG-SDGGVDSGS AVAVD TV-   | 892               |
| PRIAPULA     | LLQSG-R--KMAEDSALT TARMRIVRF LGG LGGANNIS LIS-CDAEDI AKVAVAVDAE-     | 905               |
| SOFTCORAL    | ASKSSK-RNPNEEENSPLNKVRHRILIL LGLG GKC NLG LLE-GGEGSVASSG IAWDTK-     | 888               |
| PISTILLATA   | LLKMKP-QSQHQMTLTPLAKVRHKILRM FGG LGGETNILLDNTGI--NSSNAVVDTE-         | 906               |
| HEMICHOR     | LLKPAT-Q--DGSDESPLTIVKLVHLL LGLG GSTNGY LLE-SSKEEIAKKAVAVDTE-        | 905               |
| BELCHER      | LLKAAA-E-RNQVQESDLVKARLRIVRF LGS LGGHTNACLVTGLTAEDLAKRAVAVDTQ-       | 911               |
| STRONG       | LLKKA K-D-NDQSQDSPLRSVQLQILRL LGS LGG SVNVG LLE-TSAQELSNVALAVDSDQ-   | 915               |
| STARFISH     | LIK GAS-T-TGQTQDSPLRSVQLRILHL LGS LGGQTNAY LLE-TSAEEIAKKAVAVD TQ-    | 911               |

\* \* : \* : \*

Supplementary Figure 9: Clustal Omega: DNA-PKcs alignment metazoan plus "putative archaeon"

|              |                                                                                                                                                                                                                                                                                                                                                                                                                                                                                         | <b>RYG70451.1</b> |
|--------------|-----------------------------------------------------------------------------------------------------------------------------------------------------------------------------------------------------------------------------------------------------------------------------------------------------------------------------------------------------------------------------------------------------------------------------------------------------------------------------------------|-------------------|
| ARCHAEON     | KL <b>S</b> L <b>Q</b> L <b>S</b> V <b>S</b> N <b>Q</b> <b>Q</b> <b>G</b> <b>K</b> <b>L</b> <b>E</b> I <b>F</b> <b>I</b> <b>D</b> <b>K</b> <b>L</b> <b>L</b> <b>P</b> <b>T</b> <b>I</b> <b>T</b> <b>E</b> <b>I</b> <b>C</b> <b>R</b> <b>V</b> <b>K</b> <b>I</b> <b>D</b> <b>M</b> <b>T</b> <b>Q</b> <b>T</b> <b>P</b> <b>N</b> <b>V</b> <b>N</b> <b>L</b> <b>I</b> <b>K</b> <b>A</b> <b>L</b> <b>S</b> <b>S</b> <b>A</b> <b>E</b> <b>A</b> <b>L</b> <b>N</b> <b>V</b> <b>V</b> <b>I</b> | 1024              |
| MUDCRAB      | -KH <b>I</b> R <b>F</b> A <b>M</b> P <b>F</b> G <b>Q</b> A <b>K</b> <b>I</b> <b>D</b> <b>I</b> <b>Y</b> <b>L</b> <b>D</b> <b>D</b> <b>L</b> <b>L</b> <b>P</b> <b>R</b> <b>V</b> <b>D</b> <b>L</b> <b>A</b> <b>L</b> <b>N</b> <b>S</b> <b>S</b> <b>D</b> <b>R</b> <b>Q</b> -----TKVA <b>A</b> <b>S</b> <b>E</b> <b>L</b> <b>L</b> <b>H</b> <b>S</b> <b>I</b> <b>I</b>                                                                                                                    | 922               |
| SCORPION     | Q <b>N</b> H <b>L</b> <b>K</b> <b>F</b> <b>Y</b> <b>L</b> <b>P</b> <b>F</b> <b>I</b> <b>D</b> <b>V</b> <b>K</b> <b>L</b> <b>E</b> <b>I</b> <b>F</b> <b>L</b> <b>D</b> <b>K</b> <b>F</b> <b>L</b> <b>P</b> <b>R</b> <b>I</b> <b>V</b> <b>T</b> <b>L</b> <b>S</b> <b>T</b> <b>T</b> <b>A</b> <b>S</b> <b>Q</b> <b>R</b> <b>Q</b> -----TKVA <b>A</b> <b>C</b> <b>E</b> <b>L</b> <b>L</b> <b>H</b> <b>A</b> <b>V</b> <b>V</b> <b>T</b>                                                      | 939               |
| SPONGE       | -R <b>R</b> <b>L</b> <b>G</b> <b>F</b> <b>A</b> <b>V</b> <b>P</b> <b>F</b> <b>S</b> <b>D</b> <b>L</b> <b>K</b> <b>P</b> <b>E</b> <b>I</b> <b>Y</b> <b>L</b> <b>D</b> <b>P</b> <b>Y</b> <b>L</b> <b>P</b> <b>T</b> <b>V</b> <b>C</b> <b>E</b> <b>L</b> <b>A</b> <b>L</b> <b>S</b> <b>S</b> <b>S</b> <b>D</b> <b>R</b> <b>Q</b> -----TKVA <b>A</b> <b>C</b> <b>E</b> <b>F</b> <b>L</b> <b>H</b> <b>A</b> <b>A</b> <b>M</b> <b>L</b>                                                       | 947               |
| CAPITELLA    | -Q <b>H</b> <b>L</b> <b>K</b> <b>F</b> <b>D</b> <b>L</b> <b>P</b> <b>F</b> <b>L</b> <b>D</b> <b>I</b> <b>K</b> <b>T</b> <b>S</b> <b>I</b> <b>Y</b> <b>F</b> <b>D</b> <b>A</b> <b>F</b> <b>L</b> <b>P</b> <b>K</b> <b>V</b> <b>V</b> <b>T</b> <b>L</b> <b>A</b> <b>T</b> <b>V</b> <b>S</b> <b>S</b> <b>D</b> <b>R</b> <b>Q</b> -----TKVA <b>A</b> <b>C</b> <b>E</b> <b>L</b> <b>L</b> <b>H</b> <b>S</b> <b>L</b> <b>V</b> <b>L</b>                                                       | 939               |
| DANIO        | -K <b>R</b> <b>L</b> <b>S</b> <b>F</b> <b>A</b> <b>V</b> <b>P</b> <b>F</b> <b>K</b> <b>D</b> <b>M</b> <b>K</b> <b>P</b> <b>V</b> <b>I</b> <b>Y</b> <b>L</b> <b>D</b> <b>S</b> <b>F</b> <b>L</b> <b>P</b> <b>R</b> <b>V</b> <b>T</b> <b>E</b> <b>L</b> <b>A</b> <b>L</b> <b>S</b> <b>S</b> <b>S</b> <b>D</b> <b>R</b> <b>Q</b> -----TKVA <b>A</b> <b>C</b> <b>E</b> <b>L</b> <b>L</b> <b>H</b> <b>S</b> <b>L</b> <b>V</b> <b>I</b>                                                       | 953               |
| MILII        | -K <b>P</b> <b>L</b> <b>S</b> <b>F</b> <b>A</b> <b>V</b> <b>P</b> <b>F</b> <b>M</b> <b>D</b> <b>M</b> <b>K</b> <b>P</b> <b>I</b> <b>I</b> <b>Y</b> <b>L</b> <b>D</b> <b>S</b> <b>F</b> <b>I</b> <b>P</b> <b>R</b> <b>I</b> <b>S</b> <b>E</b> <b>L</b> <b>A</b> <b>L</b> <b>S</b> <b>A</b> <b>S</b> <b>D</b> <b>R</b> <b>Q</b> -----TKVA <b>A</b> <b>C</b> <b>E</b> <b>L</b> <b>L</b> <b>H</b> <b>S</b> <b>V</b> <b>V</b> <b>A</b>                                                       | 945               |
| BAMBOO       | -R <b>P</b> <b>L</b> <b>S</b> <b>F</b> <b>A</b> <b>V</b> <b>P</b> <b>F</b> <b>A</b> <b>D</b> <b>M</b> <b>K</b> <b>P</b> <b>V</b> <b>I</b> <b>Y</b> <b>L</b> <b>D</b> <b>S</b> <b>F</b> <b>L</b> <b>P</b> <b>R</b> <b>I</b> <b>T</b> <b>E</b> <b>L</b> <b>A</b> <b>L</b> <b>S</b> <b>A</b> <b>S</b> <b>D</b> <b>R</b> <b>Q</b> -----TKVA <b>A</b> <b>C</b> <b>E</b> <b>L</b> <b>L</b> <b>H</b> <b>S</b> <b>V</b> <b>V</b> <b>A</b>                                                       | 947               |
| XENOPUS      | -K <b>R</b> <b>L</b> <b>R</b> <b>F</b> <b>D</b> <b>V</b> <b>P</b> <b>F</b> <b>K</b> <b>D</b> <b>L</b> <b>K</b> <b>P</b> <b>V</b> <b>I</b> <b>Y</b> <b>L</b> <b>D</b> <b>M</b> <b>F</b> <b>L</b> <b>P</b> <b>H</b> <b>I</b> <b>T</b> <b>E</b> <b>L</b> <b>A</b> <b>L</b> <b>S</b> <b>T</b> <b>S</b> <b>D</b> <b>R</b> <b>Q</b> -----TKVA <b>A</b> <b>C</b> <b>E</b> <b>L</b> <b>L</b> <b>H</b> <b>S</b> <b>I</b> <b>V</b> <b>A</b>                                                       | 960               |
| STERLET      | -K <b>R</b> <b>L</b> <b>N</b> <b>F</b> <b>A</b> <b>V</b> <b>P</b> <b>F</b> <b>A</b> <b>D</b> <b>M</b> <b>K</b> <b>P</b> <b>V</b> <b>I</b> <b>Y</b> <b>L</b> <b>D</b> <b>T</b> <b>F</b> <b>L</b> <b>P</b> <b>R</b> <b>I</b> <b>T</b> <b>E</b> <b>L</b> <b>A</b> <b>L</b> <b>S</b> <b>T</b> <b>N</b> <b>D</b> <b>R</b> <b>Q</b> -----TKVA <b>A</b> <b>C</b> <b>E</b> <b>L</b> <b>L</b> <b>H</b> <b>S</b> <b>V</b> <b>V</b> <b>V</b>                                                       | 957               |
| GAR          | -K <b>R</b> <b>L</b> <b>T</b> <b>F</b> <b>A</b> <b>V</b> <b>P</b> <b>F</b> <b>A</b> <b>D</b> <b>M</b> <b>K</b> <b>P</b> <b>V</b> <b>I</b> <b>Y</b> <b>L</b> <b>D</b> <b>A</b> <b>F</b> <b>L</b> <b>P</b> <b>R</b> <b>I</b> <b>T</b> <b>E</b> <b>L</b> <b>A</b> <b>L</b> <b>S</b> <b>T</b> <b>S</b> <b>D</b> <b>R</b> <b>Q</b> -----TKVA <b>A</b> <b>C</b> <b>E</b> <b>L</b> <b>L</b> <b>H</b> <b>S</b> <b>V</b> <b>V</b> <b>V</b>                                                       | 946               |
| LATIMERIA    | -K <b>R</b> <b>L</b> <b>S</b> <b>F</b> <b>A</b> <b>V</b> <b>P</b> <b>F</b> <b>A</b> <b>D</b> <b>M</b> <b>K</b> <b>P</b> <b>V</b> <b>I</b> <b>Y</b> <b>L</b> <b>D</b> <b>S</b> <b>F</b> <b>L</b> <b>P</b> <b>R</b> <b>I</b> <b>A</b> <b>E</b> <b>L</b> <b>A</b> <b>L</b> <b>S</b> <b>S</b> <b>S</b> <b>D</b> <b>R</b> <b>Q</b> -----TKVA <b>A</b> <b>C</b> <b>E</b> <b>L</b> <b>L</b> <b>H</b> <b>S</b> <b>V</b> <b>V</b> <b>V</b>                                                       | 947               |
| CAECIL       | -K <b>R</b> <b>L</b> <b>S</b> <b>F</b> <b>A</b> <b>V</b> <b>P</b> <b>F</b> <b>V</b> <b>D</b> <b>M</b> <b>K</b> <b>P</b> <b>I</b> <b>I</b> <b>Y</b> <b>L</b> <b>D</b> <b>S</b> <b>F</b> <b>L</b> <b>P</b> <b>R</b> <b>V</b> <b>T</b> <b>E</b> <b>L</b> <b>A</b> <b>L</b> <b>S</b> <b>T</b> <b>S</b> <b>D</b> <b>R</b> <b>Q</b> -----TKVA <b>A</b> <b>C</b> <b>E</b> <b>L</b> <b>L</b> <b>H</b> <b>S</b> <b>M</b> <b>V</b> <b>V</b>                                                       | 948               |
| SNAKE        | -K <b>H</b> <b>L</b> <b>N</b> <b>F</b> <b>A</b> <b>V</b> <b>P</b> <b>F</b> <b>V</b> <b>D</b> <b>M</b> <b>K</b> <b>P</b> <b>I</b> <b>I</b> <b>Y</b> <b>L</b> <b>D</b> <b>L</b> <b>F</b> <b>L</b> <b>P</b> <b>R</b> <b>V</b> <b>T</b> <b>E</b> <b>L</b> <b>A</b> <b>L</b> <b>C</b> <b>A</b> <b>S</b> <b>D</b> <b>R</b> <b>Q</b> -----TKVA <b>A</b> <b>C</b> <b>E</b> <b>L</b> <b>L</b> <b>H</b> <b>S</b> <b>I</b> <b>V</b> <b>M</b>                                                       | 947               |
| CANARY       | -K <b>H</b> <b>L</b> <b>S</b> <b>F</b> <b>A</b> <b>V</b> <b>P</b> <b>F</b> <b>A</b> <b>D</b> <b>M</b> <b>K</b> <b>P</b> <b>V</b> <b>I</b> <b>Y</b> <b>L</b> <b>D</b> <b>L</b> <b>F</b> <b>L</b> <b>P</b> <b>H</b> <b>V</b> <b>T</b> <b>E</b> <b>L</b> <b>A</b> <b>L</b> <b>S</b> <b>A</b> <b>S</b> <b>D</b> <b>R</b> <b>Q</b> -----TKVA <b>A</b> <b>C</b> <b>E</b> <b>L</b> <b>L</b> <b>H</b> <b>G</b> <b>I</b> <b>V</b> <b>T</b>                                                       | 938               |
| OSTRICH      | -K <b>R</b> <b>L</b> <b>S</b> <b>F</b> <b>A</b> <b>V</b> <b>P</b> <b>F</b> <b>A</b> <b>D</b> <b>M</b> <b>K</b> <b>P</b> <b>V</b> <b>I</b> <b>Y</b> <b>L</b> <b>D</b> <b>L</b> <b>F</b> <b>L</b> <b>P</b> <b>R</b> <b>V</b> <b>T</b> <b>E</b> <b>L</b> <b>A</b> <b>L</b> <b>S</b> <b>A</b> <b>S</b> <b>D</b> <b>R</b> <b>Q</b> -----AKVA <b>A</b> <b>C</b> <b>E</b> <b>L</b> <b>L</b> <b>H</b> <b>S</b> <b>I</b> <b>V</b> <b>A</b>                                                       | 908               |
| GECKO        | -K <b>H</b> <b>L</b> <b>S</b> <b>F</b> <b>A</b> <b>V</b> <b>P</b> <b>F</b> <b>A</b> <b>D</b> <b>M</b> <b>K</b> <b>P</b> <b>V</b> <b>I</b> <b>Y</b> <b>L</b> <b>D</b> <b>V</b> <b>F</b> <b>L</b> <b>P</b> <b>R</b> <b>V</b> <b>T</b> <b>E</b> <b>L</b> <b>A</b> <b>L</b> <b>S</b> <b>A</b> <b>S</b> <b>D</b> <b>R</b> <b>Q</b> -----TKVA <b>A</b> <b>C</b> <b>E</b> <b>L</b> <b>L</b> <b>H</b> <b>S</b> <b>M</b> <b>V</b> <b>M</b>                                                       | 947               |
| TURTLE       | -K <b>H</b> <b>L</b> <b>S</b> <b>F</b> <b>A</b> <b>V</b> <b>P</b> <b>F</b> <b>A</b> <b>D</b> <b>M</b> <b>K</b> <b>P</b> <b>V</b> <b>I</b> <b>Y</b> <b>L</b> <b>D</b> <b>L</b> <b>F</b> <b>L</b> <b>P</b> <b>R</b> <b>V</b> <b>T</b> <b>E</b> <b>L</b> <b>A</b> <b>L</b> <b>S</b> <b>A</b> <b>S</b> <b>D</b> <b>R</b> <b>Q</b> -----TKVA <b>A</b> <b>C</b> <b>E</b> <b>L</b> <b>L</b> <b>H</b> <b>S</b> <b>I</b> <b>V</b> <b>M</b>                                                       | 947               |
| ALLIGATOR    | -K <b>H</b> <b>L</b> <b>N</b> <b>F</b> <b>A</b> <b>V</b> <b>P</b> <b>F</b> <b>V</b> <b>D</b> <b>M</b> <b>K</b> <b>P</b> <b>V</b> <b>I</b> <b>Y</b> <b>L</b> <b>D</b> <b>I</b> <b>F</b> <b>L</b> <b>P</b> <b>R</b> <b>V</b> <b>T</b> <b>E</b> <b>L</b> <b>A</b> <b>L</b> <b>S</b> <b>A</b> <b>S</b> <b>D</b> <b>R</b> <b>Q</b> -----TKVA <b>A</b> <b>C</b> <b>E</b> <b>L</b> <b>L</b> <b>H</b> <b>G</b> <b>L</b> <b>V</b> <b>M</b>                                                       | 907               |
| PLATYPUS     | -K <b>R</b> <b>L</b> <b>S</b> <b>F</b> <b>A</b> <b>V</b> <b>P</b> <b>F</b> <b>A</b> <b>E</b> <b>M</b> <b>K</b> <b>P</b> <b>V</b> <b>I</b> <b>Y</b> <b>L</b> <b>D</b> <b>V</b> <b>F</b> <b>L</b> <b>P</b> <b>R</b> <b>I</b> <b>T</b> <b>E</b> <b>L</b> <b>A</b> <b>L</b> <b>S</b> <b>A</b> <b>S</b> <b>D</b> <b>R</b> <b>Q</b> -----TKVA <b>A</b> <b>C</b> <b>E</b> <b>V</b> <b>L</b> <b>H</b> <b>S</b> <b>I</b> <b>V</b> <b>M</b>                                                       | 941               |
| TASDEVIL     | -K <b>K</b> <b>L</b> <b>S</b> <b>F</b> <b>A</b> <b>V</b> <b>P</b> <b>F</b> <b>A</b> <b>E</b> <b>M</b> <b>K</b> <b>P</b> <b>V</b> <b>I</b> <b>Y</b> <b>L</b> <b>D</b> <b>V</b> <b>F</b> <b>L</b> <b>P</b> <b>R</b> <b>V</b> <b>T</b> <b>E</b> <b>L</b> <b>A</b> <b>L</b> <b>S</b> <b>S</b> <b>S</b> <b>D</b> <b>R</b> <b>Q</b> -----TKIA <b>A</b> <b>C</b> <b>E</b> <b>L</b> <b>L</b> <b>H</b> <b>S</b> <b>M</b> <b>V</b> <b>M</b>                                                       | 944               |
| <b>HUMAN</b> | -K <b>R</b> <b>L</b> <b>S</b> <b>F</b> <b>A</b> <b>V</b> <b>P</b> <b>F</b> <b>R</b> <b>E</b> <b>M</b> <b>K</b> <b>P</b> <b>V</b> <b>I</b> <b>F</b> <b>L</b> <b>D</b> <b>V</b> <b>F</b> <b>L</b> <b>P</b> <b>R</b> <b>V</b> <b>T</b> <b>E</b> <b>L</b> <b>A</b> <b>L</b> <b>T</b> <b>A</b> <b>S</b> <b>D</b> <b>R</b> <b>Q</b> -----TKVA <b>A</b> <b>C</b> <b>E</b> <b>L</b> <b>L</b> <b>H</b> <b>S</b> <b>M</b> <b>V</b> <b>M</b>                                                       | <b>939</b>        |
| MOUSE        | -R <b>R</b> <b>L</b> <b>S</b> <b>F</b> <b>A</b> <b>V</b> <b>P</b> <b>F</b> <b>R</b> <b>E</b> <b>M</b> <b>K</b> <b>P</b> <b>V</b> <b>I</b> <b>Y</b> <b>L</b> <b>D</b> <b>V</b> <b>F</b> <b>L</b> <b>P</b> <b>R</b> <b>V</b> <b>T</b> <b>E</b> <b>L</b> <b>A</b> <b>L</b> <b>S</b> <b>A</b> <b>S</b> <b>D</b> <b>R</b> <b>Q</b> -----TKVA <b>A</b> <b>C</b> <b>E</b> <b>L</b> <b>L</b> <b>H</b> <b>S</b> <b>M</b> <b>V</b> <b>M</b>                                                       | 937               |
| CRASSO2      | -Q <b>H</b> <b>L</b> <b>R</b> <b>F</b> <b>D</b> <b>V</b> <b>P</b> <b>F</b> <b>M</b> <b>D</b> <b>M</b> <b>K</b> <b>P</b> <b>Q</b> <b>I</b> <b>Y</b> <b>F</b> <b>D</b> <b>P</b> <b>F</b> <b>L</b> <b>P</b> <b>R</b> <b>I</b> <b>V</b> <b>E</b> <b>L</b> <b>A</b> <b>T</b> <b>K</b> <b>S</b> <b>G</b> <b>D</b> <b>R</b> <b>Q</b> -----TKVA <b>A</b> <b>C</b> <b>E</b> <b>L</b> <b>L</b> <b>H</b> <b>S</b> <b>L</b> <b>I</b> <b>L</b>                                                       | 939               |
| POMACEA      | -Q <b>H</b> <b>L</b> <b>R</b> <b>F</b> <b>D</b> <b>I</b> <b>P</b> <b>F</b> <b>F</b> <b>D</b> <b>M</b> <b>K</b> <b>P</b> <b>S</b> <b>I</b> <b>Y</b> <b>F</b> <b>D</b> <b>P</b> <b>F</b> <b>L</b> <b>P</b> <b>H</b> <b>V</b> <b>E</b> <b>L</b> <b>A</b> <b>T</b> <b>Q</b> <b>S</b> <b>S</b> <b>N</b> <b>R</b> <b>Q</b> -----TKV <b>S</b> <b>A</b> <b>C</b> <b>E</b> <b>L</b> <b>L</b> <b>H</b> <b>S</b> <b>L</b> <b>I</b> <b>L</b>                                                        | 939               |
| TRICHOPLAX   | -K <b>R</b> <b>L</b> <b>P</b> <b>F</b> <b>A</b> <b>I</b> <b>P</b> <b>F</b> <b>Q</b> <b>D</b> <b>M</b> <b>K</b> <b>P</b> <b>I</b> <b>I</b> <b>H</b> <b>L</b> <b>D</b> <b>P</b> <b>F</b> <b>L</b> <b>P</b> <b>R</b> <b>V</b> <b>E</b> <b>L</b> <b>A</b> <b>T</b> <b>S</b> <b>S</b> <b>S</b> <b>D</b> <b>R</b> <b>Q</b> -----TKIA <b>A</b> <b>C</b> <b>E</b> <b>L</b> <b>L</b> <b>H</b> <b>A</b> <b>L</b> <b>V</b> <b>L</b>                                                                | 924               |
| NEMATOSTELLA | -K <b>H</b> <b>L</b> <b>P</b> <b>F</b> <b>A</b> <b>V</b> <b>P</b> <b>F</b> <b>Q</b> <b>D</b> <b>M</b> <b>K</b> <b>P</b> <b>T</b> <b>I</b> <b>Y</b> <b>L</b> <b>D</b> <b>P</b> <b>F</b> <b>L</b> <b>P</b> <b>R</b> <b>V</b> <b>E</b> <b>L</b> <b>A</b> <b>T</b> <b>T</b> <b>S</b> <b>S</b> <b>N</b> <b>R</b> <b>Q</b> -----TKVA <b>A</b> <b>C</b> <b>E</b> <b>L</b> <b>L</b> <b>H</b> <b>T</b> <b>L</b> <b>V</b> <b>L</b>                                                                | 942               |
| PRIAPULA     | -K <b>N</b> <b>L</b> <b>K</b> <b>F</b> <b>G</b> <b>V</b> <b>P</b> <b>F</b> <b>A</b> <b>D</b> <b>M</b> <b>K</b> <b>P</b> <b>V</b> <b>I</b> <b>Y</b> <b>F</b> <b>D</b> <b>V</b> <b>F</b> <b>L</b> <b>P</b> <b>R</b> <b>V</b> <b>T</b> <b>D</b> <b>L</b> <b>A</b> <b>L</b> <b>S</b> <b>S</b> <b>S</b> <b>D</b> <b>R</b> <b>Q</b> -----TKV <b>V</b> <b>A</b> <b>C</b> <b>E</b> <b>L</b> <b>L</b> <b>H</b> <b>A</b> <b>L</b> <b>L</b> <b>L</b>                                               | 955               |
| SOFTCORAL    | -Q <b>H</b> <b>L</b> <b>S</b> <b>F</b> <b>A</b> <b>V</b> <b>P</b> <b>F</b> <b>Q</b> <b>D</b> <b>M</b> <b>K</b> <b>P</b> <b>T</b> <b>I</b> <b>F</b> <b>L</b> <b>D</b> <b>P</b> <b>F</b> <b>L</b> <b>P</b> <b>R</b> <b>V</b> <b>E</b> <b>L</b> <b>A</b> <b>T</b> <b>S</b> <b>S</b> <b>S</b> <b>D</b> <b>R</b> <b>Q</b> -----TKVA <b>A</b> <b>S</b> <b>E</b> <b>V</b> <b>F</b> <b>H</b> <b>S</b> <b>L</b> <b>V</b> <b>L</b>                                                                | 938               |
| PISTILLATA   | -N <b>H</b> <b>L</b> <b>T</b> <b>F</b> <b>A</b> <b>V</b> <b>P</b> <b>F</b> <b>Q</b> <b>D</b> <b>M</b> <b>K</b> <b>P</b> <b>S</b> <b>I</b> <b>Y</b> <b>L</b> <b>D</b> <b>P</b> <b>F</b> <b>L</b> <b>P</b> <b>R</b> <b>V</b> <b>E</b> <b>L</b> <b>A</b> <b>A</b> <b>K</b> <b>S</b> <b>S</b> <b>D</b> <b>R</b> <b>Q</b> -----TKVA <b>A</b> <b>C</b> <b>E</b> <b>C</b> <b>L</b> <b>H</b> <b>S</b> <b>L</b> <b>V</b> <b>H</b>                                                                | 956               |
| HEMICHOR     | -N <b>H</b> <b>L</b> <b>Q</b> <b>F</b> <b>P</b> <b>V</b> <b>P</b> <b>F</b> <b>M</b> <b>D</b> <b>I</b> <b>K</b> <b>P</b> <b>V</b> <b>I</b> <b>C</b> <b>F</b> <b>D</b> <b>P</b> <b>F</b> <b>L</b> <b>P</b> <b>R</b> <b>V</b> <b>E</b> <b>L</b> <b>A</b> <b>T</b> <b>T</b> <b>S</b> <b>S</b> <b>D</b> <b>R</b> <b>Q</b> -----TKVA <b>A</b> <b>C</b> <b>E</b> <b>L</b> <b>L</b> <b>H</b> <b>S</b> <b>L</b> <b>V</b> <b>L</b>                                                                | 955               |
| BELCHER      | -T <b>H</b> <b>L</b> <b>Q</b> <b>F</b> <b>A</b> <b>V</b> <b>P</b> <b>F</b> <b>M</b> <b>D</b> <b>M</b> <b>K</b> <b>P</b> <b>T</b> <b>V</b> <b>C</b> <b>L</b> <b>D</b> <b>P</b> <b>F</b> <b>L</b> <b>P</b> <b>R</b> <b>I</b> <b>C</b> <b>E</b> <b>L</b> <b>A</b> <b>T</b> <b>T</b> <b>S</b> <b>S</b> <b>D</b> <b>R</b> <b>Q</b> -----TKVA <b>A</b> <b>C</b> <b>E</b> <b>L</b> <b>L</b> <b>H</b> <b>S</b> <b>L</b> <b>V</b> <b>L</b>                                                       | 961               |
| STRONG       | -P <b>R</b> <b>L</b> <b>N</b> <b>F</b> <b>P</b> <b>V</b> <b>P</b> <b>F</b> <b>V</b> <b>D</b> <b>M</b> <b>K</b> <b>P</b> <b>E</b> <b>I</b> <b>Q</b> <b>L</b> <b>D</b> <b>A</b> <b>F</b> <b>L</b> <b>P</b> <b>R</b> <b>I</b> <b>V</b> <b>E</b> <b>L</b> <b>A</b> <b>L</b> <b>T</b> <b>S</b> <b>S</b> <b>D</b> <b>R</b> <b>Q</b> -----TKVA <b>A</b> <b>C</b> <b>E</b> <b>A</b> <b>L</b> <b>H</b> <b>T</b> <b>L</b> <b>V</b> <b>L</b>                                                       | 965               |
| STARFISH     | -P <b>R</b> <b>L</b> <b>Q</b> <b>F</b> <b>A</b> <b>V</b> <b>P</b> <b>F</b> <b>V</b> <b>D</b> <b>M</b> <b>K</b> <b>P</b> <b>N</b> <b>I</b> <b>D</b> <b>L</b> <b>D</b> <b>R</b> <b>Y</b> <b>L</b> <b>P</b> <b>R</b> <b>V</b> <b>E</b> <b>L</b> <b>A</b> <b>L</b> <b>T</b> <b>S</b> <b>G</b> <b>D</b> <b>R</b> <b>Q</b> -----TKVA <b>A</b> <b>C</b> <b>E</b> <b>S</b> <b>L</b> <b>H</b> <b>T</b> <b>L</b> <b>V</b> <b>L</b>                                                                | 961               |
|              | : : : : * : :* :* : :. : : : : *.* :: :                                                                                                                                                                                                                                                                                                                                                                                                                                                 |                   |

Supplementary Figure 9: Clustal Omega: DNA-PKcs alignment metazoan plus "putative archaeon"

|              |                                                                     | <b>RYG70451.1</b> |
|--------------|---------------------------------------------------------------------|-------------------|
| ARCHAEON     | FMIASSASLGV-----NYSDFYKRILPVVLQLASQSRINAFVVLVFESLLDQLVSYFTS         | 1077              |
| MUDCRAB      | LMIGTGSQQQEGI-QAKYPMAALYHHIFQAMLQLACDPDQ-VTRQLFFTLTHQTIHWFTN        | 980               |
| SCORPION     | FMSGCGAQQQPEL-QAIYSMKKLYKNVLPALLQLACDVDE-VARKLFEPFTFQLIHWFTT        | 997               |
| SPONGE       | FVIGKGTQQSVQK--KPNMTKLYQKLIPVALQLACDVDR-VAEQLFRLPVLVQMIHWFTR        | 1003              |
| CAPITELLA    | LMLGRSASQPTGN----PMAAIYRKLFPQMLKLLATDVEQ-VSRQLFEPLMLQIHWFTK         | 993               |
| DANIO        | YMSGKGAQMTEDD-KSAPPMYNLHRKVFPVLLRLACDVDQ-VTRQLFEPLVMQLIHWFTN        | 1011              |
| MILII        | YTLGKGSQISEGQ--QETLYKLNRLQFPVLLRLGCDVDT-VTRQLFEPLVLQLIHWFTS         | 1001              |
| BAMBOO       | YMLGKGSQIAEGQ--QETMYKLNRLHLYFPVLLRLGCDVDK-VTNQLFEPLVMQLIHWFTN       | 1003              |
| XENOPUS      | FMLGKATQMPDDKKTGSSPMYKIYKRTFPVLLRLACDVDK-VTEQLYKPLVMSLIHWFTN        | 1019              |
| STERLET      | FMLGKGSQIPEGE-KSTPPMYRLYKRIFPVLLRLACDVDQ-VTRQLYEPLVMQLIHWFTN        | 1015              |
| GAR          | CMLGKGSQIPEGE-KSSPPMYKLHKRIFPVLLQLACDVDQ-VTRQLYEPLVMQLIHWFTN        | 1004              |
| LATIMERIA    | YMLGKGSQIPERC-GGVPPMYRLYKRIFPVLLRLACDVDQ-VTRQLYEPLVMQLIHWFTN        | 1005              |
| CAECIL       | YMLGKASQMPEKD-QSLPPMYQLYKRTFPVLLRLACDVDQ-VTRQLYEPLVMGLIHWFTN        | 1006              |
| SNAKE        | FMLGKAAQIPEGH-KNSPPLFHLYKRMFPVLLRLACDVDQ-VTRQLYGTLMVMEIHWFTN        | 1005              |
| CANARY       | YMLGKASQMPEGC-QGPPPMYHLHKRIFPVLLRLACDIDQ-VARQLYEPLVMQLIHWFTN        | 996               |
| OSTRICH      | YMLGKASQMPEGC-QGPPPMYQLYKRIFPVLLRLACDVDQ-VTRQLYEPLVMQLIHWFTN        | 966               |
| GECKO        | YVVLGKAAQIPEGQ-EVSPMSHLYKRTFPVLLRLACDVDQ-VTRQLYEPLVMQLIHWFTT        | 1005              |
| TURTLE       | YMLGTASQMPDGP-PGSPPMYQLYKRMFPVLLRLACDVDQ-VTRQLYKLLVMELIHWFTN        | 1005              |
| ALLIGATOR    | FMLGKASQMPEGR-QGSSPMYQLYKRTFPVLLCLACDVDQ-VTRQLYEPLVMQLIHWFTN        | 965               |
| PLATYPUS     | FMLGKASQIPEGN-QGSPPMYQLYKRTFPVLLRLACDVDQ-VTRQLYEPLVMQLIHWFTN        | 999               |
| TASDEVIL     | FMLGKASQIPEGK-LGPPPMYQLYKRTFPVLLFRLACDVDQ-VTRQLYEPLVMQLIHWFTN       | 1002              |
| <b>HUMAN</b> | <b>FMLGKATQMPEGG-QGAPPMYQLYKRTFPVLLRLACDVDQ-VTRQLYEPLVMQLIHWFTN</b> | <b>997</b>        |
| MOUSE        | FMLGRATQMPEG--QGLPPMYQLYKHTFPVLLQLACDVDQ-VTRQLYEPLVMQLIHWLTN        | 994               |
| CRASSO2      | LCVGRSATQPAR---ERYSMAPLYKMFPSILQLACDVDL-VTKQLFEPLLMQLIHWFTK         | 995               |
| POMACEA      | YTLGRSAQQPGEI-QKRNPMDSLYRKLFPALLSLSCDVEQ-VCRQLFEPLVKQLIHWFTG        | 997               |
| TRICHOPLAX   | YMITGRGAQQPGGT-GSVTNYGNLYKKIFPAITLASDVEQ-VSQQLFQPLVYQLIHWFTG        | 982               |
| NEMATOSTELLA | YMLGKGVTPQDVK-KVALPMQN LWKKLIPVLLQLACDVER-VSAQLFHPLVMQLIHWFTN       | 1000              |
| PRIAPULA     | YILGTGAQQPDSI-KSKRPM SALYSRLFPVLLRLGCDVEP-VAKQLFEPLVMQTIHWFTL       | 1013              |
| SOFTCORAL    | FMLGKSVQIPDA--SSKSPLEKLWKRVFPVVLQLACDVEQ-VSQQLFRPLLFQLIHWFTN        | 995               |
| PISTILLATA   | YMLGKSVTQPG--FKKSPMEHLWKHVFPVLLQLACDVEQ-VSEQLFKPLVLFQLIHWFTN        | 1013              |
| HEMICHOR     | YMSGRGAQQPDST-QVKAPMEKLYKKVLPALLQLSCDVEQ-VARQLFEPLLSQLIHWFTC        | 1013              |
| BELCHER      | YMSGQGAQQPGEM-QAKNPMTRL YKKVFPVLMQLACDVEQ-VARQLFDPLMMQLIHWLTN       | 1019              |
| STRONG       | FMLGKGSQQPDQR-EAKSPMQLYKKVFPVAVLQLACDVEQ-VARQLFEPLVMQLIHWFTS        | 1023              |
| STARFISH     | FMLGKGTQQPEQR-QAKSPMQHLYRRVFPALFRLSCDVEQ-VARQLFEPLVMQLIHWFTG        | 1019              |
|              | : . . : . : * . : . * : : : :                                       |                   |

Supplementary Figure 9: Clustal Omega: DNA-PKcs alignment metazoan plus "putative archaeon"

|              |                                                                    | <b>RYG70451.1</b> |
|--------------|--------------------------------------------------------------------|-------------------|
| ARCHAEON     | PHHRNSKNEEYGRVLLLETLENIVATNDNNMKELCGTTFTKYLQCCIHSHIRNRT-EGSV       | 1136              |
| MUDCRAB      | NKKNENPD---TAVLLESIMDGIVTANNPALRDVSAQCLAEFVIWSRKQSREKNQ--ASL       | 1035              |
| SCORPION     | KRMINSDE---TKQFVQVIWDGLVQSKDAVFRDFSARCLKKEFVQWSIKQTSVREQEENPI      | 1054              |
| SPONGE       | NTQYESP---TVTLLLEAILEGIEHPTNASLRDFSQAQCIKEFLVWSIKQTSKKQQERSPM      | 1060              |
| CAPITELLA    | SNNSHRPD---TEALLNSLMDGIVSPSDSAVRDFSACKIREFLAWSIKQTSPKEMEAGPA       | 1050              |
| DANIO        | NRKFESQD---TVAVLEAILDGIVDPLDSTLRDFSGTCIQEFVKWSIKQTTTPKQQEKSPA      | 1068              |
| MILII        | NRKFESRD---TVAMLEAILDGIVDPVDSTLRDFCGQCVREFLKWSIKQTTPEQQAKSPA       | 1058              |
| BAMBOO       | NRKFESRD---TVALLEAILDGIVDPVDSTLRDFCGNVCREFLKWSIKQTTPEQQQKSPV       | 1060              |
| XENOPUS      | NKKFESQD---TVALLEAILTGIIVDPVDSTLRDFCGQCIQEFLRWSIKQTTPDQQAQKSPV     | 1076              |
| STERLET      | NTKFESQD---TVAMLEAILDGVVDPVDSTLRDFCGQCVQEFMWSIKQTTTPKQQEKSPA       | 1072              |
| GAR          | NRKFESQD---TVAILEAILDGIVDPVDSTLRDFCGQCIQEFLKWSIKQTTTPKQQEKSPA      | 1061              |
| LATIMERIA    | NKKFESQD---TVAMLEAIMDGIIVDPIDSTLRDFCGLCIQEFLKWSIKQTTTPKQQESTPA     | 1062              |
| CAECIL       | NKKFESQD---TVALLEAILDGIVDPVDSTLRDFCGHCIREFLKWSIKQKTPQOMEKSPV       | 1063              |
| SNAKE        | NKKFESQD---TVTLLLEAILDGIVDPVDSTLRDFCGQCVHEFLKWSIKQTTPEQQEKSPV      | 1062              |
| CANARY       | NKKFESQD---TVAFLLEAMLSGIVDPVDSTLRDFCGQCIREFLKWSIKQTTPRQQEESPA      | 1053              |
| ONSTRICH     | NKKFESQD---TVAFLLEAILGGITDPVDSTLRDFCGQCVREFLKWSIKQTTTPKQQEKSPV     | 1023              |
| GECKO        | NKKFESQD---TVTLLLEAILDGIVDPVDSPLRDFCGRCVREFLKWSIKQTTPEQQERSPV      | 1062              |
| TURTLE       | NKKFESQD---TVALLEAILDGIVDPVDSLLRDFCGQCVREFMKWSIKQTTPEQQEKSPV       | 1062              |
| ALLIGATOR    | NKKFESQD---TVALLEAILDGIVDPVDSTLRDFCGQCIREFMKWSIKQTTPEQQEKSPV       | 1022              |
| PLATYPUS     | NKKFESQD---TVALLETILDGIVDPVDSTLRDFCGQCVREFLKWSIKQTTPEQQEKSPV       | 1056              |
| TASDEVIL     | NKKFESQD---TMTLLETILDGIVDPVDSTLRDFCGQCVREFLKWSIKQTTPEQQEKSPV       | 1059              |
| <b>HUMAN</b> | <b>NKKFESQD---TVALLEAILDGIVDPVDSTLRDFCGRCIREFLKWSIKQITPQQEKSPV</b> | <b>1054</b>       |
| MOUSE        | NKKFESQD---TVALLEAILDGIVDPVDSTLRDFCGRCVQEFLKWSIKQTTPEQQEKSPV       | 1051              |
| CRASSO2      | NNKAEESE---SMALLDAIYDGI IQPNDTALRDFCAVCLREFLKWSIKQTK--NVEKSPI      | 1050              |
| POMACEA      | NKMAESPE---SMALLDSIFDGLVQQDNTMLRDFAAQCLREFLIWSIKQTSKKAMETNPR       | 1054              |
| TRICHOPLAX   | NSNYESVE---TIALLNALLDGV IHSTDSALRDFCAKSLREYLHWSIKQTTKKQEKTSN       | 1039              |
| NEMATOSTELLA | NRKYESPE---TIALLDALLEGVVHPTDTSLRDFSQAQCIREFLQWSIKQTSKQLEKSPI       | 1057              |
| PRIAPULA     | NRMFESPE---TMCLLDAIMEGIVDATDAALRDFCGSCIREFLIWSIRQTTVRQQERSPG       | 1070              |
| SOFTCORAL    | NKQYESP---TIILLETLLDGI VHPDTALRDL SALALEEFLRWSIKQATKNQLEKSPI       | 1052              |
| PISTILLATA   | NRKYETPE---TMALLDAIVDGI VHPVDTSLRDFSQAQCIKEFLQWSIKQSSEKQLEKSPI     | 1070              |
| HEMICHOR     | NKKFESPE---TIAMLDAILDGI CHPTDTALRDFSACVKKEFLYWSIKQTSKKTMEKSPI      | 1070              |
| BELCHER      | NRKFESEE---TITLLDAIMDGLVHPTDTALRDFSSRCVREFLQWSIKQTTPKQLEKSPI       | 1076              |
| STRONG       | NKKYESDE---TSTLLNAILAGIVHPTDTALRDFCARCISEFLRWSIKQTSKKQQEKSPI       | 1080              |
| STARFISH     | NKKFESEE---TTALLNAMLDGVIHPTDTSLRDFSACCLKKEFLKWSIKQTSKKQQEKSPI      | 1076              |
|              | . : . : : . : : : . : : . : .                                      |                   |

Supplementary Figure 9: Clustal Omega: DNA-PKcs alignment metazoan plus “putative archaeon”

|              |                                                                                                           | <b>RYG70451.1</b> |
|--------------|-----------------------------------------------------------------------------------------------------------|-------------------|
| ARCHAEON     | NMKVIDTALEELCFLLSHPLESKQAGLLLSNVYKLI <b>RSE</b> LVI <b>V</b> KRFSMFILYLLIKLL                              | 1196              |
| MUDCRAB      | NLKSI---LKRIFSFCK <b>HP</b> SAFK <b>R</b> LGGSLAWNSI <b>Y</b> REV <b>RED</b> SLAVETWTLEILSHLMSAL          | 1092              |
| SCORPION     | GMNVV---LNCLYNYSL <b>HP</b> NPYK <b>R</b> LGAALAFNSI <b>Y</b> TIF <b>REE</b> ESLVDKFTLEIAVHF <b>IES</b> L | 1111              |
| SPONGE       | NTKSL---LKRLYSMSG <b>HP</b> STAK <b>R</b> LGAALAFNSI <b>Y</b> TVL <b>REE</b> ESLVDVFIIEMLVVMVNSL          | 1117              |
| CAPITELLA    | NPKRL---LKRMYSLLE <b>HP</b> SSM <b>R</b> LGGALMFNSI <b>Y</b> SVF <b>REE</b> DALVDQFSLQILSVLVNSL           | 1107              |
| DANIO        | NMKSL---FKRIYSLAL <b>HP</b> SVFK <b>R</b> LGAALAFNS <b>MY</b> RQF <b>REE</b> SSLVEQFVFEVLVVFVESL          | 1125              |
| MILII        | NTKSL---FKRLYSLAL <b>HP</b> NTFK <b>R</b> LGAALAFNS <b>LY</b> REF <b>RQE</b> SALVDQFIFEVLVVYVESL          | 1115              |
| BAMBOO       | NTKSL---FKRLYSLAL <b>HP</b> NTFK <b>R</b> LGAALAFNS <b>LY</b> REF <b>REE</b> SALVEQFVFEVLVVYVESL          | 1117              |
| XENOPUS      | NTTSL---FKRLYSLAL <b>HP</b> NAFK <b>R</b> LGAALAFNS <b>IY</b> RDF <b>REE</b> TALVENFVFEVLVIYMESL          | 1133              |
| STERLET      | NTKSL---FKRLYSLAL <b>HP</b> NVFK <b>R</b> LGAALSFNSI <b>Y</b> RQF <b>REE</b> STLVDQFIFELLVIFVESL          | 1129              |
| GAR          | NTKSL---FKRLYSLAL <b>HP</b> NVFK <b>R</b> LGAALAFNS <b>IY</b> KQF <b>REE</b> SSLVDMFVFEALVIFVESL          | 1118              |
| LATIMERIA    | NTKSL---FKRLYSYAL <b>HP</b> GAFK <b>R</b> LGAALAFNS <b>LY</b> KEF <b>REE</b> SALVDKVFETLVVYMESL           | 1119              |
| CAECIL       | NTKSL---FKRLYSLAL <b>HP</b> NAFK <b>R</b> LGAALAFNS <b>IY</b> REF <b>REEN</b> ALVDQFVFEILVVYLESL          | 1120              |
| SNAKE        | NTKSL---FKRLYSLAL <b>HP</b> NAFK <b>R</b> LGAALAFNS <b>IY</b> QEF <b>REEN</b> ALVDQFVFEALVVYLESL          | 1119              |
| CANARY       | NTKSL---FKRLYSLAL <b>HP</b> SAFK <b>R</b> LGAALAFNS <b>IY</b> REF <b>REEN</b> SLVEQFVFEALVVFLES           | 1110              |
| OSTRICH      | NTKSL---FKRLYSLAL <b>HP</b> SAFK <b>R</b> LGAALAFNS <b>IY</b> REF <b>REEN</b> SLVEQFVFEALVVFLES           | 1080              |
| GECKO        | NTKSL---FKRLYSFAL <b>HP</b> NAFK <b>R</b> LGAALAFNS <b>IY</b> REF <b>REEN</b> ALVDQFVFEALVLYLES           | 1119              |
| TURTLE       | NTKSL---FKRLYSLAL <b>HP</b> NALK <b>R</b> LGAALAFNS <b>IY</b> REF <b>REEN</b> SLVEQFVFEVLVVYLESL          | 1119              |
| ALLIGATOR    | NTKSL---FKRLYSLAL <b>HP</b> NAFK <b>R</b> LGAALAFNS <b>IY</b> REF <b>REEN</b> SLVEQFAFEALIVF <b>IES</b> L | 1079              |
| PLATYPUS     | NTKSL---FKRLYSFAL <b>HP</b> NPFK <b>R</b> LGAALAFNS <b>IY</b> REF <b>REED</b> SLVDQFTFEALVIFLES           | 1113              |
| TASDEVIL     | NTKSL---FKRLYSFAL <b>HP</b> NAFK <b>R</b> LGAALAFNS <b>IY</b> REF <b>REEE</b> ALVEQFVFEALVIYMESL          | 1116              |
| <b>HUMAN</b> | <b>NTKSL---FKRLYSLALHPNAFKRLGASLAFNSIYREFREEESLVEQFVFEALVIYMESL</b>                                       | <b>1111</b>       |
| MOUSE        | NSKSL---FKRLYSLAL <b>HP</b> NAFK <b>R</b> LGAALAFNS <b>IY</b> KEF <b>REE</b> GSLVEQFVFEALVTYMESL          | 1108              |
| CRASSO2      | NAKSL---LKRLYSYAL <b>HP</b> GAFK <b>R</b> LGAALAFNS <b>IY</b> TVF <b>RED</b> NAMVNLYTFQILVHFVESL          | 1107              |
| POMACEA      | NVTSI---LKRMQSFAL <b>HP</b> SAFK <b>R</b> LGAALAFNS <b>IY</b> MVF <b>REE</b> QSLVDRFTFQILVLFVESL          | 1111              |
| TRICHOPLAX   | NAKSL---LKRLYSLAS <b>HP</b> SAIK <b>R</b> LGAALAFNS <b>IY</b> VVL <b>REE</b> STLVDTFIFEILVNVNSL           | 1096              |
| NEMATOSTELLA | NIKSL---LKRLYSLAL <b>HP</b> NASK <b>R</b> LGAALAFNS <b>IY</b> TVF <b>REER</b> SLVDVFLVLEILVTYLES          | 1114              |
| PRIAPULA     | NTKSL---LKRMYSLAL <b>HP</b> SAAK <b>R</b> RGATLVFN <b>IY</b> TVL <b>REE</b> EMLVDTFIIEILVTFVDSL           | 1127              |
| SOFTCORAL    | NIKSL---FKRLYSLAL <b>HP</b> SANK <b>R</b> LGAALAFNS <b>IY</b> RVF <b>REE</b> SSLVENFTIEILVTYLES           | 1109              |
| PISTILLATA   | NIKSL---LKRLYSLAL <b>HP</b> SASK <b>R</b> LGAALAFNS <b>IY</b> TVF <b>REE</b> ASLVDIFVLEILVNYLECL          | 1127              |
| HEMICHOR     | NTKSL---LKRLYSLAL <b>HP</b> NVFK <b>R</b> LGSALAFNS <b>IY</b> TVY <b>REE</b> DSLVDQFVLEILVIYINSL          | 1127              |
| BELCHER      | NIKSL---LKRLYSLAL <b>HP</b> NPFN <b>R</b> LGAALGFNS <b>IY</b> RDF <b>REE</b> SSQVDMFTFELLVTFVESL          | 1133              |
| STRONG       | NTKSL---LKRLYSMAS <b>HP</b> SAFK <b>R</b> LGAALAFNS <b>IY</b> TIF <b>REE</b> EVLVDQFTFELLVVFVESL          | 1137              |
| STARFISH     | NTKSL---LKRLYSMAL <b>HP</b> SSF <b>R</b> LGAALTFN <b>IY</b> TVF <b>REED</b> SLIDQFVCEILVTFVNSL            | 1133              |
|              | . . : : : ** : .. * . :* *.: :. : :. *                                                                    |                   |

Supplementary Figure 9: Clustal Omega: DNA-PKcs alignment metazoan plus “putative archaeon”

|              |                                                                     | <b>RYG70451.1</b> |
|--------------|---------------------------------------------------------------------|-------------------|
| ARCHAEON     | DVKDLSEE---NEKVCY-PLSSYVR-----TRIRR-----                            | 1222              |
| MUDCRAB      | DLAHNDDLVLGTHEQTRAAILHVRRIILIVRKELFWK-MSSNRRIPIDFEGG----TFEDM       | 1147              |
| SCORPION     | ATAHYDDKILGTQDKCKQALNHLERIMEVKAKLLSK-TSKRRRPLRNINDS----ILPEV        | 1166              |
| SPONGE       | KLAHKDAQSIGTVDQCSLSLDHMSRI IKAKSSTCLS KANKNRRVPRGLKSA----DLSIL      | 1173              |
| CAPITELLA    | ALAHRDDKSLGTQEQCKSALLHVERILIKKQVTFNK-DSKQRIKPRGWRDA----NMTTA        | 1162              |
| DANIO        | ALAHFDEKSVGTVQCCSSLDHLKRI IKHKADSLN--INSKRRIPRGFPADQ-SVCLSNV        | 1182              |
| MILII        | ALAHADDNSLGTVQCCDAIDHLNRI IKQKASALN--KPIKGRVPRGFPPDQ-PVSLKEV        | 1172              |
| BAMBOO       | ALAHADDKSLGTIQCCDCINHLKRI IKQKAHELN--KPVKRRVPRGFPPDQ-MVCLTDV        | 1174              |
| XENOPUS      | ALSHADEKSLGTTQCCSDAVDHLKRI IIRKAASLN--KATKRRIPRGFPQGN-TVCLFDI       | 1190              |
| STERLET      | ALAHTEDEKSLGTTQCCSDAIDHLKRI IKQKAASLNAEKTSRRRVPRGFPPDK-PVCLLDV      | 1188              |
| GAR          | ALAHSEDEKSLGTTQCCSGAIDHLKRI IKHKAATLN--KSSRRRVPRGFPPDK-PVSLTDV      | 1175              |
| LATIMERIA    | ALAHMDEKSLGTVQCCDAIDHLKRI IEQKAPSLN--KAATRRVPRGFSPDK-VFCLSDV        | 1176              |
| CAECIL       | ALSHQDEKSLGTVQCCDAIDHLKRI I IHKAPSLN--KTLKRRRLPRGF PSTKSSFCLSDL     | 1178              |
| SNAKE        | ALTHGDEKSLGTIQCCDAIDHLKRI IKHKASTLN--QKSTRRLPRGFPS-R-SICLEDV        | 1175              |
| CANARY       | ALAHTEDEKSLGTIQCCDAINHLKRI IKHKAPSLN--KEGKRRVPRGFPPTK-SVCLEDI       | 1167              |
| OSTRICH      | ALTHADEKSLGTTQCCDTINHLKRI IKHKAPSLN--RAGERRVPRGF PATK-TVCLLDI       | 1137              |
| GECKO        | ALTHGDEKSLGTTQCCDAVDHLKRI IKHKASTLN--KESQRRRLPRGFPPAK-SICLEDI       | 1176              |
| TURTLE       | ALTHTEDEKSLGTVQCCDAIDHLKRI IKHKASSLN--KAEKRRIPRGFPNAK-SVCLLDL       | 1176              |
| ALLIGATOR    | ALTHTEDEKSLGTTQCCDAIDHLKRI IKHKAPSLN--KAEKRRRLPRGFQPAE-SLCLLDI      | 1136              |
| PLATYPUS     | ALTHADEKSLGTIQCCDAIDHLKRI IEKKHISFN--EEKNRRLPRGF PNAR-SVRLLDL       | 1170              |
| TASDEVIL     | ALTHADEKSLGTIQCCDAIDHLTRI IEKKHITLN--KPKRRRLPRGFPPVQ-TLCLLDL        | 1173              |
| <b>HUMAN</b> | <b>ALAHADEKSLGTIQCCDAIDHLCRI IEKKHVSLN--KAKRRRLPRGFPPSA-SLCLLDL</b> | <b>1168</b>       |
| MOUSE        | ALAHEDKSLGTVQCCDAIDHLRRI IEKKHVSLN--KAKRRRLPQGFPPLT-SLCLLDL         | 1165              |
| CRASSO2      | ATAHEDESSMGTQTQCKMVL DHMERI IKVKANVLSK-EDKNRTEPKQWSVV----KLDIA      | 1162              |
| POMACEA      | GIAHQDEASLGTQEQCKKALEHVEKIVCKRVDILRK-PSPHRKEPSEWSKQ----TLDIA        | 1166              |
| TRICHOPLAX   | ALSHTEDEKSLGTQEQLSKALAHIERI IKAKASTLNK-ESKNRRTPTGFM-TK-TVTLHHV      | 1153              |
| NEMATOSTELLA | ALAHTEDDPAQGTQDQCSQVISHLERI IKTKATLLDK-ENKQRRIPRGFQMLD-SITLSHL      | 1172              |
| PRIAPULA     | ALAHNDEKSLGTQEQAQALDHIERILRGKAHLLNK-DKKSRRRPKEFTDA----TLFTT         | 1182              |
| SOFTCORAL    | EMAHEDDEISLGTQSQCIEVISHLERI IIVSKSSVLLN-VNKKRRVPRGFSAD--TTTLRHL     | 1166              |
| PISTILLATA   | CLSHGDEEARGTQEQCQVQVI IHLERI IHSRAQLLVK-ENHRRRIPRGFASQS-SITLIHM     | 1185              |
| HEMICHOR     | AMAHFDDKSLGTQEQCVRVVDHLERI IRVKANMLNR-TSKTRRVPRDFNRDD-CPTLSHV       | 1185              |
| BELCHER      | ALAHHDEKSLGTQAQCVAVLTHLDRI IITTKADLLNK-HSKVRRVPRGFDRES-PPTLPDL      | 1191              |
| STRONG       | ALAHHDDKSLGTQEQGSEVLKHLERIMRVKAALLNK-ESKNRRVPRGLPEDC-SPTLSHM        | 1195              |
| STARFISH     | ALAHHDDKSLGTQLHGVEVLNHLERI IRVKADMLNK-ESKIRRIREFPAGV-CPTLSML        | 1191              |
|              | : . . . : :                                                         |                   |

Supplementary Figure 9: Clustal Omega: DNA-PKcs alignment metazoan plus "putative archaeon"

|              |                                                                     | End RYG70451.1                  |             |  |
|--------------|---------------------------------------------------------------------|---------------------------------|-------------|--|
|              |                                                                     | Start RYG70450.1 (Archaeon)     |             |  |
| ARCHAEON     | IFYFILFCVSR--ALR--HMRTFISLV                                         | TILD-----ADWSSNVVAR--NAATYVANWT | 1269        |  |
| MUDCRAB      | LLWLLLEQCGSPKTLVRHMSMELLESLAPHSKDY--TSVHKFIGQOLEK-PESIKKL----       |                                 | 1200        |  |
| SCORPION     | VEWLLKNCGCLQTECRHKMELVFQLAPCLSGF--NGCKDYFSHLLET--KGKKKF----         |                                 | 1218        |  |
| SPONGE       | TAWLLAQCGSIETEARMKCRKLLVQLAPPSSNV--VNIRMWIRKTIES--EGGNYF----        |                                 | 1225        |  |
| CAPITELLA    | VRWLLRQCGRPQTECRHVCMLVQQLAPCVHEI--NGARELFSVLLSQ--GNSEYF----         |                                 | 1214        |  |
| DANIO        | VLWLLTQCGRPQTECRHKSMELFFEFVPLLPGN--SSPAMWLDEQLKQ--RGPGFL----        |                                 | 1234        |  |
| MILII        | VMWLLTQCGRPQTECRHKCMVLFYELVPLLPGN--KTPSCWLADVLKE--RGVSFL----        |                                 | 1224        |  |
| BAMBOO       | VMWLLTQCGRPQTECRHKMELFYEFPVILPGA--RTASLWLEEILKR--NGVSFL----         |                                 | 1226        |  |
| XENOPUS      | VLWLLLEQCGRPQTECRHKAMQLFFEFVPLLPGN--KPLTAWLDDQVEK--EGIIIFL----      |                                 | 1242        |  |
| STERLET      | IMWLLVQCGRPQTECRHKMELFYEFPVLLPDN--KSPASWLDDILKK--QGVAFI----         |                                 | 1240        |  |
| GAR          | VMWLLVQCGRPQTECRHKMELFYEFPVLLPGG--KNPAVWLEDILKD--EGEGFL----         |                                 | 1227        |  |
| LATIMERIA    | VMWLLVQCGRPQTACGHKAMELFYEFPVLLPGK--KSPAOWLDEVLKK--QGVSF----         |                                 | 1228        |  |
| CAECIL       | VPWLLGQCGRPQTECRHKAIDLFCKFIPLLPGN--KSPSSWLNDHLKE--EGISFI----        |                                 | 1230        |  |
| SNAKE        | VMWLLRQCGQPQTECRHKVMELLFEFVPLLPGN--PSPSSWLGVDLQK--EGIYFL----        |                                 | 1227        |  |
| CANARY       | VMWLLVQCGRPQTECRHKMELFYEFPVLLPGN--KSPSSWLADTLKK--RTVTFL----         |                                 | 1219        |  |
| OSTRICH      | VMWLLVQCGRPETECRHKSMELFYEFPVLLPGN--KSPSSWLADVLKE--KGCSFL----        |                                 | 1189        |  |
| GECKO        | VMWLLFQCGRPQTECRHKAMELFFEFIPLLPGS--KSPSLWLDLILRK--QEISFL----        |                                 | 1228        |  |
| TURTLE       | VMWLLVQCGRPQTECRHKSMELFYEFPVLLPGN--QPSLWLGDLKK--QGISFL----          |                                 | 1228        |  |
| ALLIGATOR    | VMWLLMQCGRPQTECRHKSMELFYEFPVLLPGN--KSPSSWLGDLKK--QDSSF----          |                                 | 1188        |  |
| PLATYPUS     | VYWLLGQCGRPQTECRHKSIELFYKFPVLLPGN--KSPASWLNDILKE--EGVSFL----        |                                 | 1222        |  |
| TASDEVIL     | VKWLLAQCGRPQTECRHKSIELFYKFPVLLPGN--RSPSCWLTDLILKK--EDISFL----       |                                 | 1225        |  |
| <b>HUMAN</b> | <b>VKWLLAHCGRPQTECRHKSIELFYKFPVLLPGN--RSPNLWLKDVLKE--EGVSFL----</b> |                                 | <b>1220</b> |  |
| MOUSE        | VEWLLAHCGRPQTECRHKSMELFYKFPVLLPGN--KSPSLWLKDLIKK--KGISFL----        |                                 | 1217        |  |
| CRASSO2      | VRWLMRQCGRPQTDICRHACMKLVHQLAPCITGI--KSTKDYFQTFYKS--EKASYF----       |                                 | 1214        |  |
| POMACEA      | VRWLVQRQCGRPQTECRHACMQLMYKLAPLIPGI--SSPFDYFKAALDI--QNASYF----       |                                 | 1218        |  |
| TRICHOPLAX   | VNWLVQRQCGRPQTACRHQCMQLVYGLAPQLSGV--STIQDWVKTIIGS--SSVTFF----       |                                 | 1205        |  |
| NEMATOSTELLA | IPLLIKLCKGKQTECRHQCMKLVQVTPLLHGI--GSAAIWMKNTHKE---HDSFF----         |                                 | 1223        |  |
| PRIAPULA     | VGWLLQQCGRPQTECRHKMELVCKLSMHQSKLPVKSAAEFFRLLLDL--HRAEYF----         |                                 | 1236        |  |
| SOFTCORAL    | IPWLVVRKCGCSQTECRHQCMRLVSVLAPLLPEC--SSVQTMKKTVES--DGEDYF----        |                                 | 1218        |  |
| PISTILLATA   | IPWLVKQCGRPSSECRHQCMRLISKLAPLLPGV--NSAADWMKKTHE---DHPSSF----        |                                 | 1236        |  |
| HEMICHOR     | VTWLLLQCGRLQTECRHQCMILVCKLIPLLPGN--NSASTWMHRTMAEKGRGPDYF----        |                                 | 1239        |  |
| BELCHER      | VTWLLQQCGRPQTECRHRCMLLVCSFLPLLPRK--PSPQAWMKERLKE--DGPDFF----        |                                 | 1243        |  |
| STRONG       | VMWLLMTQCGRPQTECRHQCMVLVYGLTSLPLGR--NTPATWMTQNTARE--RGAEYF----      |                                 | 1247        |  |
| STARFISH     | VIWLLRQCGRAQTECRHQCMILYKITYKIPLLPGH--NTPQTMQNTLKE--KGPDYF----       |                                 | 1243        |  |

: . \* . . \*

Supplementary Figure 9: Clustal Omega: DNA-PKcs alignment metazoan plus “putative archaeon”

|              |                                                                      | <b>RYG70450.1</b> |
|--------------|----------------------------------------------------------------------|-------------------|
| ARCHAEON     | DMLNKFSGCTRA-----VIAYVNE-HVNHRMGSNMVLLLLFVAALDVYNWLVSMQ              | 1317              |
| MUDCRAB      | --VDIEGGGQAG---LGIKHHTEPTSLATAGVPGN-LMNIYFEALLAGLDGYSWLIGKG          | 1254              |
| SCORPION     | --LNCFESEMSN-----TVPSFNQ-NDGLK-PIINWLEGLHTMLDCY YWVFQGS              | 1263              |
| SPONGE       | --VTRFESHGH-----SGILKAPTLAPA----PNIN-IAINWLQSLQA AVDN YRWLLKEQ       | 1273              |
| CAPITELLA    | --IQRFEFGMY-SSARMGLNOKPTMSRVQE-NFSLN-AACTWFDLVLATLDCY TWVFGER        | 1269              |
| DANIO        | --ISCLEGGG-----LLSQPTLREIEA-PFSIR-GTLQWMDLLL AALDCYNTFTNLR           | 1282              |
| MILII        | --IGKFESAGSDHAKCSGI IYQPTLKDLOE-PFSVR-AALQWMDMLLAALDCYNTFVRLA        | 1280              |
| BAMBOO       | --VNKFEAGSDHDNCSGI ICHPTLQALKE-PFSVR-AALQWMDMLLAALDCYNTFIGLH         | 1282              |
| XENOPUS      | --INRFEAGHSDGMHTGIFNIPALHDLHE-PFSMH-AVLQWLDMLLAALDCYNTFIGMR          | 1298              |
| STERLET      | --ISRFEAGREDGGCSGILSQTTLHDLQE-PFSLR-AVLQWMDMLLAALDCYNTFIGLH          | 1296              |
| GAR          | --IRRFEAGRCGDGSSGLLSQATLRDLQG-SFSVR-AALQWMDLLL AALDCYNTFIGLH         | 1283              |
| LATIMERIA    | --IQKFEGGGNTDDRLSGILSQTLCDLQE-PFSLR-AVVQWMDMLLAALDCYNTFIELR          | 1284              |
| CAECIL       | --ISRFEGGGSDGDHQSGLIAQPTLCDLKE-PFSLR-AVVQWMDMFLAALDCYNTFIWMR         | 1286              |
| SNAKE        | --IKKFEGGGCEGENVSGILSHPTLYELOE-SFSLQ-AVVQWMDMLLAALDCYNTFIEPG         | 1283              |
| CANARY       | --INKFEGGGTDAKSPSGILSPTLHGMQE-PFSLQ-AVMQWMDMFLAALDCYNTFFELQ          | 1275              |
| OSTRICH      | --INKFEGGGRDADSPSGIFSRPTLHGIQE-PFSLR-TVMQWMDMFLAALDCYNTFFELR         | 1245              |
| GECKO        | --IKKFEGGGDEGKSVSGILSHPTLSGLQD-NFSLR-AVVQWMDMLLAALDCYNTFIEQG         | 1284              |
| TURTLE       | --INKFEGGGNDGDNLSGILSQTLCDMQE-PFSLR-AVVQWMDMFLAALDCYNTFIEQG          | 1284              |
| ALLIGATOR    | --INKFEGGGNQDDNLSGILSYPTLHHLQE-PFSVR-AVVQWMDMLLAALDCYNTFIEQR         | 1244              |
| PLATYPUS     | --ISRFEAGGTGNDHLSGILVWPTLLDLEG-PFSLR-AVLQWMDMLLAALDCYNTFIEEK         | 1278              |
| TASDEVIL     | --INRFEAGNASEHLSGILAQPTLFDLQG-PFTLR-AVVQWMDMLLAALDCYNTFIEER          | 1281              |
| <b>HUMAN</b> | <b>--INTFEGGGC--GQPSGILAQPTLLYLRG-PFSLQ-ATLCWLDLLL AALECYNTFIGER</b> | <b>1274</b>       |
| MOUSE        | --INTFEGGASSSDQPAGILAQPTLVYLQ-PISLR-GVLQWLDLLL AALECYNTFIEKE         | 1273              |
| CRASSO2      | --INRFEKGQQ----KYGLLSCEPMTAVDS-SFSVQ-NAVSWFDHYLAALDCYIWTFGES         | 1266              |
| POMACEA      | --VVRFEGGGQ-VGDRGGLCGHPTPSKVAE-NFSLK-AVLSWFDMLLAALDCYCWVFGEG         | 1273              |
| TRICHOPLAX   | --ITRFEGGG----SKYGIGRYQTALDISD-TFNLR-SMKNWYDYFLAALDCYSWVFSEK         | 1257              |
| NEMATOSTELLA | --VRRFEGGGG--RGNGILTYPTLADMGG-AFSLK-ETLLWFHYLLAALDCYTWVFGEQ          | 1276              |
| PRIAPULA     | --IERFEAGGIPGGATCLSNQ---QEGFEA-PISMT-TALSWFDHMLAALDCYTWVFSK          | 1289              |
| SOFTCORAL    | --ILRFECGFA---GKSGIQKHPTLSSINE-TFSLT-TTKHWF DLVLAALDSYIWSFGQR        | 1271              |
| PISTILLATA   | --VHRFEGGGGG--GQKGIEQYPTLAHIGG-HFSLK-ETILWFEFVLAALDCYTWSFSEH         | 1290              |
| HEMICHOR     | --ITRFEGGGGKGGHKTGISKHPTLNTVDK-TFSVK-VASNWF DLFLAALDCYTWVFGEK        | 1295              |
| BELCHER      | --ITRFEGGGGKTGHKSGIKKHPKISTMDS-TFTVK-TAVSWFDLLL AALDSYCWVFGQR        | 1299              |
| STRONG       | --VGRFEGGGHK----SGIQKQPTLASVEQ-QFSVK-ATITWLEYLLAALDCYVWVLGES         | 1299              |
| STARFISH     | --VSRFEGGGVKAASRSGISKYPTLSTMGQ-PFSVK-LACSWFDHLLAALDCYTWVFGEK         | 1299              |
|              | : : :                                                                | : : *             |

Supplementary Figure 9: Clustal Omega: DNA-PKcs alignment metazoan plus "putative archaeon"

|              |                                                                   | <b>RYG70450.1</b> |
|--------------|-------------------------------------------------------------------|-------------------|
| ARCHAEON     | IIQVSELFDSVSNNGEYSCRIFSHIKSVLDSY-----ISST-----                    | 1354              |
| MUDCRAB      | IVPADKLLKCKE-----SRILLASSYFLQNIATKSLSQYVKDNIRVSE----TGAIGS        | 1303              |
| SCORPION     | VLKLSDFINDAS--NRE--SKFFPSIEFFLKTLCIDFDQRVQAFTHESV----KKQIFS       | 1315              |
| SPONGE       | YVSPREIFSSTS----S--SNLFKSIDHFLKCIALVGIEGVVNSPEV-----AMATS         | 1319              |
| CAPITELLA    | LMSPNQILIASN--NKG--TIIFQVLHFFMEELAQEDISAAVKLFPKQVAD----GSSIFT     | 1321              |
| DANIO        | CLQLQRILGTCE----K--SSFLPAVHFFLTELQSMQDIQAARACFRLGNA----GQSHFS     | 1332              |
| MILII        | MVKPSELLGTSQ----E--TGFMKAMNFFLKTTLARHDITAAEECFTLGVK----GVL-FS     | 1329              |
| BAMBOO       | LVKPSKIMGTSE----N--SSFLKALNFFLTNLARHDVTAAEESFAYGIK----GIL-FS      | 1331              |
| XENOPUS      | FLKANTVLGKNAE---K--SSFLKAAFFFITSLSMENIKAAEQCMGSKS-----S-VFS       | 1346              |
| STERLET      | LVKPHEVLGAKV---Q--SGFLKAIEFFITELAVQDISAAELCFVSGPK----GAL-FS       | 1345              |
| GAR          | FVKPQQILGTQE---K--SSFLKAIGFFIAELTMDISAAERCFSGSE----GSL-FS         | 1332              |
| LATIMERIA    | MINPREIFGTTS---V--SGFLRAVEFFLTRLATQDITAAEQCFRTAGSK----DTM-FS      | 1333              |
| CAECIL       | AIKPNEILSTTT---Q--SSFLRTCEFFLQKLCIHDITAAEQCFRTGPS----GNI-AS       | 1335              |
| SNAKE        | MIKPSEIFASNT---G--SSFLKSLEFFLQKIALYINISGAEQCFSSASK----GDMLLS      | 1333              |
| CANARY       | MIKPDEVLGVNE---R--SLFLKAVQFFLDTIALHDIHAAEQCFDSSSK----GSM-FS       | 1324              |
| OSTRICH      | MIKPHEILGVNE---R--SSFLKAVRFFLETIALHDIHAAEQCFDCGLK----GSV-FS       | 1294              |
| GECKO        | MIKPNEIVATNT---E--SSFMTSVEFFLEKLALKDVSAGAEQCFNTASK----GNI-FS      | 1333              |
| TURTLE       | MIKPNEILGTKM---R--SSFLRAVEFFLKTIVLHDIHAAEQCFDTGSK----GNM-FS       | 1333              |
| ALLIGATOR    | MFKPENVLGTN-----SSFLRAVEFFLETIALHDIHAAEQCFYTKSK----DNV-FS         | 1291              |
| PLATYPUS     | TVKAHEILGTQA---K--SSFLRAISFFLERIAFHDIHAAEQCFGTGSK----GSM-FS       | 1327              |
| TASDEVIL     | AIKAQEILGTKA---K--SSFLKAVGFFLENIALHDIRAAEKCFGTGIK----GNV-FS       | 1330              |
| <b>HUMAN</b> | <b>TVGALQVLGTEA---Q--SSLLKAVAFFLESIAMHDIHAAEKCFGTGAA---GNR-TS</b> | <b>1323</b>       |
| MOUSE        | TVQGQEVLGAEV---Q--SSLLKSVAFFLESIAHARSARAVEQRFVSGGAP----GPP--S     | 1321              |
| CRASSO2      | LLNPDDIFSGEG--RKQ--SKLLQAMQHFLSQVVMEDMDEVGKMRHEP-----LTDVYT       | 1317              |
| POMACEA      | LLSPAKMFESSG--FKG--TRVFSSLOQFVTEMALGDLVAAKQFQRKA-----EAVFFT       | 1324              |
| TRICHOPLAX   | MMSPQIIGDKAQ-LGS--CKIFGSIEFFLSKLCIHLSDETVKLLYSK-S----TLQLFT       | 1309              |
| NEMATOSTELLA | LLPPADLLRSKY---S--SVLFTSLSYFLSNLAMLGIQAAIKCFPKTTH----ITDVAT       | 1326              |
| PRIAPULA     | LLQPTALFAGGTGKREE--RTCFAVMSDFMRPSGEE-----RRRRRRWADRRHVH           | 1337              |
| SOFTCORAL    | LLTPSSIFQGKT---T--SVLWRTLLYFIEKLSLNGIEKAFECFPTTSDG--VNTHAFS       | 1323              |
| PISTILLATA   | LLSPSWVFTSSEDNEMP--SVLLVSLKFFLSHLAMFGITEATSCFTSGPS--RGMGDIFT      | 1346              |
| HEMICHOR     | LLGPIELFAGKA--NKP--TNVFKSVDFLSKLALEDVYAAAKCITSSS-----AGLIFT       | 1346              |
| BELCHER      | FLSPSDVLSGSG--KKP--SQLFTALEFFLTKLALSDDIAAARCFESHG-----AATLFT      | 1350              |
| STRONG       | LLTPAAVFKTIKE--GKK--SVLFQTTIDSFMKVAQ--YDLFAFAK-----GCGSMETAFT     | 1348              |
| STARFISH     | LLSPSVVYTATA--RRP--SVLFQSLQYFLSSLSLLDITGAARGIEYGGSKTSAFHQVFT      | 1355              |

. : . :

Supplementary Figure 9: Clustal Omega: DNA-PKcs alignment metazoan plus "putative archaeon"

|              |                                                                  | <b>RYG70450.1</b> |
|--------------|------------------------------------------------------------------|-------------------|
| ARCHAEON     | --VTSNSDWRQEDAWIRSVVFLTTIIISKSPSGRTLTELQAFGIPITSLFRNLVHFSLNYS    | 1412              |
| MUDCRAB      | PLEYEASNKLKCTVVVRLFDVFCVLLQDGVQS--VQLLNEYSIFTAEMYGLI-LQCVLNP     | 1360              |
| SCORPION     | PKEKDEYLRNCFIIVRLINFVTTIVENYHLQ--LNTIPSTFW SINFWNCI-YSSVLNP      | 1371              |
| SPONGE       | IHERGEYQRNKWCTIELLTLFIELLLTKHTSETVSFEYVPDSLWSQELYTIV-MDSL FYS    | 1378              |
| CAPITELLA    | PREREDYNQTKCTVIVRTLSEICTMFGNYKTE--SLKVIPTSFWSSNLWDTL-LLAVLQP     | 1378              |
| DANIO        | PRETEQYNYSKCSIIVRMLEFSTMVLQKCPQD--LWKLMEKDFVNSSLFTLV-VLAVCEP     | 1389              |
| MILII        | PREREEYNYKCTIIVRIMEFACLILEGLQD--CWKVLEKDLLNSDLFELI-AMVVIDP       | 1386              |
| BAMBOO       | PREREDYNFNKCTIIVRIMEFVSMVLEDCQQD--FLKMLEKYLLNSTLFELV-ATVVIDP     | 1388              |
| XENOPUS      | PHEIEAYNYSKCTIIVRIMEFITMFLIDICQQD--SLKILENSVFNEPMWELI-AITVCDP    | 1403              |
| STERLET      | PKEREDYNYSKGTIIVRMMEFVSMVLENCQPE--FWKLEQNILNPTFFELI-TTTVCDP      | 1402              |
| GAR          | PREREDYNYSKGTIIVRLMEFVTMVLKCSQD--LWKVLERDILHLTFELI-ATTVCEP       | 1389              |
| LATIMERIA    | PREREDYSYSKCTIIVRILTFVSMVLEKCPD--LWKVLEKDLLTPALLELT-VRTVCEP      | 1390              |
| CAECIL       | PQEREDYNYSKCTIIVRIMEFVSMILENCQQD--FWRLLEKDLLNNNLVELT-VLTVCDP     | 1392              |
| SNAKE        | PHEREEYNYKCTIIVRIMVFGSMILETHQQH--VWKLEKELLNENLIKLV-VKTICDP       | 1390              |
| CANARY       | PQERDKYNYSKCTIIVRILEFVTVILEMCQQD--FWKLEKELLNASFIELV-VMTVCDP      | 1381              |
| OSTRICH      | PQEREVYNYSKCTIIVRIMEFVTMVLSCQQD--FWKLEKELLNASFIELL-VMTVCDP       | 1351              |
| GECKO        | PQEKEDYNYSKCTIIVRIMVFSMILETCQQD--FWKLLERELLNKNLIELT-VRTVCDP      | 1390              |
| TURTLE       | PQEREEYNYKCTIIVRIMAFVSMILETCQQD--FWKLEKELLNANLIELL-VRIVCDP       | 1390              |
| ALLIGATOR    | PQEREEYSYSKCTIVVRIIRFVSMILETCQQD--FWKLEKELLNLNLIELL-VVTVCDP      | 1348              |
| PLATYPUS     | PQEREEYNYKCTIIVRIMEFATMLLNTYQ-D--TWKLEKDLLNATFMELV-VEIVCDP       | 1383              |
| TASDEVIL     | PQEREEYNYKCTIVVRIMEFSSMLLNTCQ-D--VWKLEKDLLNAYFMELL-VKTLCDP       | 1386              |
| <b>HUMAN</b> | <b>PQEGERYNYSKCTVVVRIMEFTTLLNTSP-E--GWKLLKDLNTHLMRVL-VQTLCEP</b> | <b>1379</b>       |
| MOUSE        | LHEEEKYNYSKCTVLRIMEFTTLLLIASP-E--DCKLLEKDLNNTLMQVL-VKMICEP       | 1377              |
| CRASSO2      | PKERDEYNRTKCTAVVRTLNFVFCVLVARSPTS--VKKLLPSEILGKDLWNLI-SMCVLQP    | 1374              |
| POMACEA      | PKEKDDYNKVCTVLRIMWNLTVLIARYPSE--AFKVIPQTLFCDDLWRLC-IRCVVQP       | 1381              |
| TRICHOPLAX   | PREIEEYNYKCTTIVRLINFVAVLLQMSPTS--IIEGIPRQIWSQNLFEMI-FLCILTP      | 1366              |
| NEMATOSTELLA | PKEMDEYNRVKCTVIVRIMNFVTVLLQAYPDQ--GFKIVPTSLWSDDLFTVV-FSCALEP     | 1383              |
| PRIAPULA     | PGEMEKYNRSKCMVVIRAMDLSFILLNMA----SLQVIPDSTWSMELWDVV-LLSVLDP      | 1391              |
| SOFTCORAL    | PSEIQEYNRAKCTVLRVRIIAFITLILLQMNAKE--YLEIVPSELWTGKFFEAL-CTSVLEP   | 1380              |
| PISTILLATA   | PKEIDDYFRAKCTVIVRVLNFLTILLQDFPQE--TLKTLPPPEFWSEDLFEVV-LSCVLEP    | 1403              |
| HEMICHOR     | PREIDDYNYKCTAIVRLLDFISVLLAVHTKD--LSKSIPLSFWSTNLFEVI-VSCVLDP      | 1403              |
| BELCHER      | PRETEDYNYGKCTVIVRIMDFVTVLLGAFPQD--AYKVVPDAVWKSPLYDMV-VTAALEP     | 1407              |
| STRONG       | PREEDYNRTKCTVIIRLFYFMGAMLSHTKE--ALEVIPSKLWTGLFAEIL-CGCVLKP       | 1405              |
| STARFISH     | PRESEFYNQEKCTVIVRLWDLFTVLLENYASD--AVKVIPKSIWQDSLFDLV-VTCILQP     | 1412              |
|              | : : .. :                                                         |                   |

Supplementary Figure 9: Clustal Omega: DNA-PKcs alignment metazoan plus “putative archaeon”

|              |                                                                         | <b>RYG70450.1</b> |
|--------------|-------------------------------------------------------------------------|-------------------|
| ARCHAEON     | TSLYPNTGDIYN-----TVFTFMKAALEIAPAS-----LCDEIS                            | 1446              |
| MUDCRAB      | SSVGFVDKDEVTKHLPSRMEEV LKVMQKKV PNVVSAAFIQ TLEKYL GSPQ-YDVLETFT         | 1419              |
| SCORPION     | KFLGFDMDTYIFNQFPKETRTLLKVFYEYMPKPLYNNFNEHLYEYL--ESKCNINLFP              | 1429              |
| SPONGE       | SLVNTAPDDPSTAKRISEAAVSCLTAMCTSLPIDVKQNLIAIASNINTGQTNNVINRLP             | 1438              |
| CAPITELLA    | TQLGFNMGQVEVMNHLPEQTLGTLQILMRS LPRNLAQELIESVSRHLN-MSSCDLSSKLP           | 1437              |
| DANIO        | SSIGFN MADLEV MTHLPEVCFPLLKALASA---PYRTQLESCIRMRITKQSVEELCAID-          | 1445              |
| MILII        | TSIGFN MADVQVMKNLPNVCV KLLNAVMS---PFKETLVDSVRKRIT AQSI EALCNVD-         | 1442              |
| BAMBOO       | PSIGFN MADVQVMKGLPDI CVRLMKAALRS---PYQESLECSMKRRLKSQSIEDLCNVD-          | 1444              |
| XENOPUS      | SSIGFN TADVEVINNLPNICIKLMKALGNT---SYRSSLEVSLKRVTLQSI EELCSVD-           | 1459              |
| STERLET      | SSIGFN MADVEVMKNLPDI CVRLLKALAKS---PYKGQLEISMRRISYKSVEELCGVD-           | 1458              |
| GAR          | SSIGFN MADMEVMTNLP EVCVHILKALLKS---PYKTQLEQSIRRRVSQQNVEQLCAVD-          | 1445              |
| LATIMERIA    | ASIGFN TADVQVMKNLPEICV RLLKALMKS---PYKDTLEASIRKRITARS IKELCSVD-         | 1446              |
| CAECIL       | SSIGFN VADVQVMKNLPDVCIKLLKGLMKS---PFKNDLEFSIKKRITSESIKDLCDVD-           | 1448              |
| SNAKE        | ESVGFNI ADVQVMENLPSICVRLVKALMKT---PYNESLENSIKEIITMKSIEELCTVD-           | 1446              |
| CANARY       | SHVGFNT ADVQVMKLLPDISVRLMKALMKS---PYQESLKLCLKERITPQSLEDLCSVD-           | 1437              |
| OSTRICH      | SHVGFNT ADVQVMKNLPDISVRLMKALMKS---PYKESLKL SLKERLTPQSLEDLCSVD-          | 1407              |
| GECKO        | KSIGFN TADVQVM EKL PDI CVRLIKALMRS---PYKESLVTSMKKVITPESIEEFYGV E-       | 1446              |
| TURTLE       | ANIGFN TADVQVMKNLPDVSRLIKALMKS---PYKESLELSIKDRITSQSI EELCSVE-           | 1446              |
| ALLIGATOR    | SAVGFNT ADVQVMKNLPDNTVRLMKALAKT---PYKSSLELSIKKRITSHSIQELCSVD-           | 1404              |
| PLATYPUS     | SSIGFN VADVQVM SNLPDVCV SVMKALKKS---PYKDALEGNIKKRVTAQSI EELCTVD-        | 1439              |
| TASDEVIL     | SSIGFN IADVQVMN NLPNVCV NLLKALKKS---PYKESLEINIKKRITPQSIEVICAVN-         | 1442              |
| <b>HUMAN</b> | <b>ASIGFNIGDVQVM AHL PDVCV NLMKALKMS---PYKDILETHLREKITAQSI EELCAVN-</b> | <b>1435</b>       |
| MOUSE        | MSLGFNIGDVQVMNHLPSICV NLLKALRKS---PYRDMLETHLKEKVTVQSVEELCSIN-           | 1433              |
| CRASSO2      | SAVGFNLGDVEI IKNLPTEMEQLLKV LNAKLQPDVLAAMCKEFGRL--QGDRDLSGLLS           | 1432              |
| POMACEA      | SSVGFNMGDIEIITKLPHEMMQVLKVL SKQLPLPERKELVKILEQEL--KGKDLFGQIP            | 1439              |
| TRICHOPLAX   | HQLGFNVGDI EIVLEKLPQOMKDVCGLFQMKLPKDKRELMITLKE LLSRNRSYNLPDLLP          | 1426              |
| NEMATOSTELLA | ALIGFN VGDVEVIEKLP EQVSMTEAAWHISMFLG-----FSRCNLF EKLP                   | 1428              |
| PRIAPULA     | TRVGFNMADIEVVEKLP EQTERLLIALSWKLPNAPKKELHSRVAR----SLSEKKNILP            | 1447              |
| SOFTCORAL    | QSLGFNVADLEVLEKLP EQTFELCKSLASKLPKQFLIHLTTTLM SKISLGGR CNLFELLP         | 1440              |
| PISTILLATA   | GVVGFHMGDVEVVEKLP EQTGVLC KLLVQRLSGECLERLKG TLEKKIALGSHCNLFDQLP         | 1463              |
| HEMICHOR     | SSVGFDLADIEVISNLPKTTGQLLMFMTQKAPGNVSSEMKKCLQEKLKPKSHMHLMNITP            | 1463              |
| BELCHER      | TALGFNMGDVEIMEKLPQETKQLLLLMCRSLPSQQGALLKSQVAAKLSRRSSHDLFSHLP            | 1467              |
| STRONG       | ASLGFNMADTVIMNALPQTTRVLDLLYTKLPTEQLKKLETVIHKRITASRSEDLFSILP             | 1465              |
| STARFISH     | TVVGFNMADVEIMN NLPKTTTRKLLRLMSTHLPANLRN NLSKAVTRSVTKSSHDLTKLLQ          | 1472              |
|              | :        :                                                              |                   |

Supplementary Figure 9: Clustal Omega: DNA-PKcs alignment metazoan plus "putative archaeon"

|              |                                                                   | <b>RYG70450.1</b> |
|--------------|-------------------------------------------------------------------|-------------------|
| ARCHAEON     | GILVGAVDAQVQHFOQIQSDDENSYSLVKRTQLLLKLALALRP-----GVVATSVIHSEV      | 1501              |
| MUDCRAB      | SPLAE---GWNVPLK-----SQHVI EGLQI LQRS-GWLAQ-----CSVIRKSLASEL       | 1462              |
| SCORPION     | LNLN---DKDLKILE-----IQEMLLGYEQLIEN-KL----WPKQNCNKSKKLACDM         | 1473              |
| SPONGE       | VSYN-ESTTSSGILL-----FNRLVQGHIIYLAESNKCLSDVLKSMGISEEESLAMRL        | 1489              |
| CAPITELLA    | IPLL---EPNQDYIQ-----LRLLVSGFEQLNSA-GLLSNTLVS---KSSEKLAEDL         | 1482              |
| DANIO        | --LY-ETDTRNSHAS-----MNL LLSACRQLHQ S-GLLNSVLHSQDASYGCSLGSKL       | 1493              |
| MILII        | --LY-SPGARTDHAG-----LRSILSACQQLHKA-DLLNSAIDCEAGSLSSSLSLKL         | 1490              |
| BAMBOO       | --LY-SQ---SDHAK-----LNSILLACKQLHKA-GLLNSVLKQCIGSIVPPLNLKL         | 1489              |
| XENOPUS      | --LY-DPGARFNVRK-----LGSVLSACKQLYKA-EFFNSIVPEQVGGQ--RFGSKL         | 1505              |
| STERLET      | --LC-NVDARSDRAR-----LVFVLSACKQLHKA-GLLNSALQSQAASFGLSLGSKL         | 1506              |
| GAR          | --LY-GSEARSEHAR-----LALVLSACKQLHRA-GLLNSTLQSQAASFGLSLGSKL         | 1493              |
| LATIMERIA    | --LY-NPDARLDHIR-----LGSILSACKQLYDA-GLLNSAVQYQSGDFNLQLGSTL         | 1494              |
| CAECIL       | --LY-NQDARHYHAR-----IGSILSACKQLHKA-GLLNSVLQSQTAGLQFTVGSKL         | 1496              |
| SNAKE        | --LY-NPEARLDHVR-----YIAILSACRQLHKA-GVLHCILQSKGADLQFETGSKL         | 1494              |
| CANARY       | --LF-NSEARLDQVR-----FGAVLSACKQLQKS-GLLHSVLHGQDEGSHFSVGSKL         | 1485              |
| OSTRICH      | --LF-NSDARFDQVK-----YSAILSACKQLQKA-GLLHSVLHNQDEVPHFSLGCKL         | 1455              |
| GECKO        | --LY-NPDSRLDHVR-----LGAILSACKQLHRV-GLLHCTLQSQGVGLHCEAGSKL         | 1494              |
| TURTLE       | --LY-NPDARFDHVR-----LSSILSACRQLHKA-GLLHSTLQSQSGSLHFTVGSKL         | 1494              |
| ALLIGATOR    | --LY-DPDARFDRVR-----ISSILSACKQLHKA-GVLHSVLQSQSGSLHFTVGSQ L        | 1452              |
| PLATYPUS     | --LY-KPDARFDRPR-----LASILSACKQLQRA-GLLHAAVHPQASHLQRPGSTKL         | 1487              |
| TASDEVIL     | --LY-NSDARFDRAN-----LASLLSACKQLHKA-GLLHSTVESQATDLPHPIGTKL         | 1490              |
| <b>HUMAN</b> | <b>--LY-GPDAQVDRSR-----LAAVVSACKQLHRA-GLLHNILPSQSTDLHHSVGT EL</b> | <b>1483</b>       |
| MOUSE        | --LC-SSGARQERSK-----LLSILSACKQLHKA-GFSHVISPSQSTALNHSVGMRL         | 1481              |
| CRASSO2      | RPLDD---PSTDHVF-----LQQLVSGYQLHHSV-GLLSKVSM--ATTLPD-LANKL         | 1477              |
| POMACEA      | ISLTS---SSIDYTN-----LQQTVEGYCQLHDV-RILLEVLG--KHGQPEKLAELL         | 1485              |
| TRICHOPLAX   | IRFDRDNELNIDFER-----LTFLIKGYKQLLTM-GILKTTPADHK----DLIEKI          | 1472              |
| NEMATOSTELLA | IPLAGE-DSRVDHLY-----LSHLVTGYKQLHAA-GLLMDVMLTRGSTKPLEYGSRL         | 1478              |
| PRIAPULA     | RLPCLMTDTGDDTRY-----LSSLVCGYEQLYKA-ELLLPALQEAAAP----ALPASL        | 1494              |
| SOFTCORAL    | LPLSGEEDQMDHTR-----LQLLVRGYQQLHRA-EILLPALAKEGEWSAEKCS EEL         | 1491              |
| PISTILLATA   | FPLSNPQEHQVDCLR-----LAYLVQGYQQLHCA-GLLLPALKAQARNASEEYAVKL         | 1514              |
| HEMICHOR     | SILKGD-DKGINYVK-----LTHMVSQYEQQLHKA-NLLLPALQKTGMASGDKFSQQL        | 1513              |
| BELCHER      | EVSAGV--AELDHVR-----LTLMVSGYQQLHNA-GLLLPALQKTGMASGDKFSQQL         | 1513              |
| STRONG       | MLFSNESDLGLDHVQ-----LQHLVNGYKQLQKA-KLLTRQT--TNQALS-----I          | 1508              |
| STARFISH     | SMFGRDEGLTTDHGK-----LIHLVKGYEQLHQQA-NLLSAAT--TGHGSGSSFAVKL        | 1521              |
|              | : * :                                                             |                   |

Supplementary Figure 9: Clustal Omega: DNA-PKcs alignment metazoan plus "putative archaeon"

|              |                                                                                                     | <b>RYG70450.1</b> |
|--------------|-----------------------------------------------------------------------------------------------------|-------------------|
| ARCHAEON     | LNV---IFHLCRVSADEM--KLIKKS----DTTAE <b>LLSLL</b> FAGDLPFYSSGLSLSQETLV                               | 1552              |
| MUDCRAB      | IMW---VCNSLFMYG-----SASSPHPTQLPFLHV <b>VLD</b> FAVTLDS-----QVLELL                                   | 1505              |
| SCORPION     | LSS---VWESCILETEIG-CCIPILNPSVLN <b>FNGKMLT</b> VALKLDI-----SSEDL                                    | 1520              |
| SPONGE       | YTNALT <b>I</b> IRGISSSPGDGTP-GYMPPLHKL <b>TGELLLK</b> LGLELSD-----SVEPFL                           | 1539              |
| CAPITELLA    | VNT---VFMGMVTAVD-GKPTLVNLS <b>PVSQSLAEKMLT</b> LAFQMGY-----PEKNLV                                   | 1529              |
| DANIO        | LTS---VYKSIAPGTD <b>R--KSLPSMDVGS</b> RKLAD <b>RLVQL</b> SFCLGD-----QSEQTV                          | 1539              |
| MILII        | LSV---VYKGIAPGDER--KSLPSIDVSS <b>Q</b> LAD <b>GLLQL</b> SFSLGG-----QCEELV                           | 1536              |
| BAMBOO       | LST---VYKGIAPGDER--KSLPTMDVSS <b>KMLADGLLQL</b> SFSLGG-----QCEELV                                   | 1535              |
| XENOPUS      | LSV---VYKGIAPTNER--KSLPSLDISS <b>KRLAEG</b> LL <b>ELAF</b> MF <b>GG-----QCEELV</b>                  | 1551              |
| STERLET      | LSV---VYKGIAPGDER--KSLPSMDVSS <b>RKLADGLLQL</b> AFSLGG-----QCKELV                                   | 1552              |
| GAR          | LSV---VYKGIAPGDEK--KSLPSMDVSS <b>RRLADGLLQL</b> AFSLGG-----QSEQLV                                   | 1539              |
| LATIMERIA    | LSV---VYKGIAPGDER--KSLPSIDISS <b>KRLADGLLQL</b> AFS <b>FGL-----QSGELV</b>                           | 1540              |
| CAECIL       | LSV---VYKGIAPGDER--KSLPSLDISS <b>KRLADGLLQL</b> AFDLGG-----QCDELV                                   | 1542              |
| SNAKE        | ILV---VYKGIAPGDEG--RSLPSLDIGS <b>KRLAEG</b> LL <b>HLAF</b> AFGV-----RCTELV                          | 1540              |
| CANARY       | LSV---VYKGIAPGGER--MSLPCLDLS <b>RKRLAD</b> G <b>LLQLAF</b> AIDE-----QCEELV                          | 1531              |
| ONSTRICH     | LSV---IYKGIAPGAER--LCLPSLDIS <b>KRLADG</b> LL <b>QLAF</b> AIDG-----QCEELV                           | 1501              |
| GECKO        | LLV---IYKGIAPGDER--KSLPSLDMS <b>S</b> KRLA <b>EGLLQL</b> AFAFGV-----QCKELV                          | 1540              |
| TURTLE       | LSV---VYKSIAPGDER--KSLPSLDISS <b>KRLADG</b> LL <b>QLAF</b> AFGG-----QCEELV                          | 1540              |
| ALLIGATOR    | LSV---VYKGIAPGDER--KCLPSLDISS <b>KRLADG</b> LL <b>QLAF</b> AFGC-----QSEELV                          | 1498              |
| PLATYPUS     | LSV---VYKGIAPGDER--QSLPSLEISS <b>QLASG</b> LL <b>ELAF</b> AFGG-----LCEELV                           | 1533              |
| TASDEVIL     | LSV---VYKGIAPGDER--TALPSLEISS <b>KRLASG</b> LL <b>ELAF</b> AFGG-----LCEELV                          | 1536              |
| <b>HUMAN</b> | <b>LSL---VYKGIAPGDER--QCLPSLDL</b> SCK <b>QLASG</b> LL <b>ELAF</b> AFGG-----LCERLV                  | <b>1529</b>       |
| MOUSE        | LSL---VYKGI <b>VPAEER--QCLQSLDP</b> SCKSLAN <b>G</b> LL <b>ELAF</b> GF <b>GG-----LCDHLV</b>         | 1527              |
| CRASSO2      | LEY---VHSSLIC <b>VEG-GTKKSQTP</b> SPTAQV <b>TATRM</b> LE <b>LSF</b> CLGV-----QIKK <b>VV</b>         | 1524              |
| POMACEA      | FDS---VLKGIT <b>EKKD-GKDKTV</b> SLS <b>PAHRFASQ</b> LL <b>KLAF</b> QLGL-----PAEK <b>LV</b>          | 1532              |
| TRICHOPLAX   | MKS---V--VDCFRG <b>REMNGDR</b> TALSPA <b>Q</b> Q <b>VAAE</b> LL <b>DLAF</b> ELNE-----TIDIF <b>F</b> | 1518              |
| NEMATOSTELLA | LNA---VYEGACRA <b>AVRTSGS</b> IIVLSPASH <b>QLACK</b> LL <b>ELAF</b> DLGI-----EVIT <b>IF</b>         | 1526              |
| PRIAPULA     | LTS---VFEGCTLS <b>PRDGVSSL</b> TGMSPSVREL <b>GGRMLR</b> LAF <b>TMKV-----ESD</b> SL                  | 1542              |
| SOFTCORAL    | LKS---VFQGFIVQDS <b>D-VFRIVNL</b> TPASRELAK <b>LLDL</b> AFDLGL-----KIES <b>VL</b>                   | 1538              |
| PISTILLATA   | FTA---VYDGVK <b>PSLNVG-LQTVIL</b> DPAS <b>QHLASK</b> LL <b>DLAY</b> DLGL-----QFN <b>YLM</b>         | 1561              |
| HEMICHOR     | LTA---VFESIST <b>KQSN-SLIVSH</b> LSP <b>TAHELAVR</b> LL <b>DLAF</b> LLAS-----QSK <b>ELV</b>         | 1560              |
| BELCHER      | VSA---VFKSM <b>VTRKD-GHPTAAS</b> LPPSFH <b>QLTG</b> GL <b>QLAC</b> QLHP-----QGH <b>DLL</b>          | 1560              |
| STRONG       | LDF---VMRGL <b>VKRG</b> ENGQ-EARK <b>MTPSE</b> IDL <b>QRLL</b> ELAF <b>QLGV-----QT</b> NSLI         | 1555              |
| STARFISH     | FIT---VFD <b>SLTTSDE</b> AGLL <b>QANL</b> TPLSV <b>ELAES</b> LL <b>DLAF</b> LLGI-----EAK <b>MLV</b> | 1569              |
|              | :                                                                                                   | .                 |

Supplementary Figure 9: Clustal Omega: DNA-PKcs alignment metazoan plus “putative archaeon”

|              |                                                                             | <b>RYG70450.1</b> |
|--------------|-----------------------------------------------------------------------------|-------------------|
| ARCHAEON     | FSDSAAAKNPSLLSV-----IAHPKY <b>GSKLY</b> QQYSRLIIDAVVTAPSSSPVSLYH            | 1602              |
| MUDCRAB      | VKQ---VTNMEDVKG-----VTGQQIEK <b>GFHIL</b> NVLGNKIIIPHILPCCD-----            | 1546              |
| SCORPION     | KKL---LD-EQQLYVSNLK-----TKTRR <b>GLIMF</b> STYQQEISLFAGINSK-----            | 1561              |
| SPONGE       | LLV---LS-PAQSGA-----GASFAAQD <b>GLLLY</b> ITYSGLINNKLLHIIK-----             | 1579              |
| CAPITELLA    | ELI---FN-SNNIHGVSTS-----VQCS <b>PHGTLFY</b> AAFKSVVNLNFVKSVE-----           | 1571              |
| DANIO        | GLL---LN-TITLSV-PLSGSLNPHFLSF <b>SHGEYFY</b> SLFQTSLNTELLRSVD-----          | 1586              |
| MILII        | SLL---LN-TMELSV-PLSGATQKNFIT <b>FSHGEYFY</b> SLFSETINAEELLKSLK-----         | 1583              |
| BAMBOO       | SLL---LN-TVELSV-PLSGASQRHFIS <b>FSHGEYFY</b> NLFPETINSELLRNLN-----          | 1582              |
| XENOPUS      | SLL---LN-TVILSV-PLPGTSQRNIIN <b>FSHGGYFY</b> TLFAETINTELLNNLD-----          | 1598              |
| STERLET      | DLL---LN-SIMLSV-PLSDTSQKNFIT <b>FSHGEYFY</b> SLFQETINSELLKNLD-----          | 1599              |
| GAR          | SLL---LN-TIMLSV-PLSGTSDKNFIS <b>FSHGEYFY</b> SLFQQTINIELLGLSD-----          | 1586              |
| LATIMERIA    | CLL---LN-RVTLSV-PLSGTSQRNFIT <b>FFHGEYFY</b> NLFMETTNSSELLRNLS-----         | 1587              |
| CAECIL       | SLL---LN-TVKLSV-PLSGTSQRNIIS <b>FSHGEYFY</b> SLFSETINTELLKNLN-----          | 1589              |
| SNAKE        | SLL---LN-TLMLFV-PLSGAAQESLIN <b>FSHGEYFY</b> SLFLEINRELLKNLE-----           | 1587              |
| CANARY       | SLL---LN-TVVLSV-PLSEASONQLMN <b>FSHGGYFY</b> TLFAETINQQLLKNLD-----          | 1578              |
| OSTRICH      | SLL---LN-TVVLTV-PLLGASRKNLVN <b>FSHGEYFY</b> SLFSETINEQLLKNLD-----          | 1548              |
| GECKO        | SLL---LN-SLMLS-PLSGVSRNLI <b>FSHGEYFY</b> SLFSDTINRELLKNLD-----             | 1587              |
| TURTLE       | SLL---LN-TMMLSV-PLSGTSQRSLIS <b>FSHGEYFY</b> SLFSETINQELLKDL-----           | 1587              |
| ALLIGATOR    | SLL---LN-TAMLSV-PLSEAAPRNLL <b>SFCHGEYFY</b> NLFSATINHELLKNLD-----          | 1545              |
| PLATYPUS     | SLL---LN-TVVLSV-PLAGTSQRNLI <b>SFCHGEYFY</b> NLFSATINTELLKNID-----          | 1580              |
| TASDEVIL     | NLL---LN-TVVLSV-PLSGTCQKNLI <b>FSHGEYFY</b> SLFSEVINTELLKNLD-----           | 1583              |
| <b>HUMAN</b> | <b>SLL---LN-PAVLST-ASLGSSQGSVI<b>FSHGEYFY</b>SLFSETINTELLKNLD-----</b>      | <b>1576</b>       |
| MOUSE        | SLL---LN-SAMLST-QYLGSSQR-NIS <b>FSHGEYFY</b> SLFSEVINSELLKNLD-----          | 1573              |
| CRASSO2      | MCI---LD-ESMVEGTAK-----GYSQ <b>SHGELM</b> FTAFKTTVSVHLAKAMA-----            | 1565              |
| POMACEA      | EGI---LD-IRIIQGLSL-----GIEY <b>MLGDH</b> FFTLFKTPISSHVAASS-----             | 1572              |
| TRICHOPLAX   | RYL---LD-ETK--L-----YGDSNSATATL <b>GMTLY</b> YTFNSNINAFKAVSN-----           | 1559              |
| NEMATOSTELLA | RRA---VN-ILLIQM-----ICFL <b>FS</b> DGSSV <b>GAVFY</b> TTFQASINTYLIKNAQ----- | 1569              |
| PRIAPULA     | SLL---FD-DTRLLGVSAK-----QT <b>TKGSMFY</b> STFGHEINNHLVGMAT-----             | 1582              |
| SOFTCORAL    | HCI---LN-KSCLADAKGS-----S <b>TVGMV</b> FYQTFHNTIEHLLIKNSS-----              | 1578              |
| PISTILLATA   | ESI---ME-DSND-----NPGSS <b>CGCTFY</b> RIFQTSINGFFIERAN-----                 | 1597              |
| HEMICHOR     | SCL---MN-KTPVKTGRVD-----SSAGY <b>CGLSFY</b> SHFKVPINTQLAQHGQ-----           | 1602              |
| BELCHER      | DCV---MN-KTPLMTGGGK-----KS <b>STFQGMV</b> FFSTFKSCICQQLIKTCA-----           | 1602              |
| STRONG       | DCL---LE-TTPVVSSTRSLTSKLSASQ <b>TSGLV</b> FLTTYKQPIMDQLVKHGQ-----           | 1603              |
| STARFISH     | SCL---LD-KTALFSGRS-----S <b>TSKGA</b> VFYTTFFKTKLNGEMAVQAQ-----             | 1608              |

\* :

Supplementary Figure 9: Clustal Omega: DNA-PKcs alignment metazoan plus "putative archaeon"

|              |                                                       | <b>RYG70450.1</b> |
|--------------|-------------------------------------------------------|-------------------|
| ARCHAEON     | SDNLLHILSSSQHEPSRILLEDILSYISDQIACNPELVNYVVYTM-VP----- | 1649              |
| MUDCRAB      | -----LIVTTLLELVKEGKGFLEVMVFNGLMLLNTLIRNSELRK--        | 1583              |
| SCORPION     | -----HFISLMNINIKSKTTVLKILVGI-LDSIGKVKEFRY--           | 1597              |
| SPONGE       | -----MAIDVLLKNAKTHPQQVSVILNLL-LEYVQKDFKINNNN          | 1617              |
| CAPITELLA    | -----KFVPLLMRHLEANGETLSSVLIGI-AESVISDRPLRK--          | 1607              |
| DANIO        | -----RSVPLLSSANQNPSMVSVLNGM-LDHSFRERSVRK--            | 1622              |
| MILII        | -----SAVTQLMRSASENPKMVSTVLNGM-LDQSFRDHTVRK--          | 1619              |
| BAMBOO       | -----SAVAQLMTSARENPKMVSAVLNGM-LDHSFRDHTVRK--          | 1618              |
| XENOPUS      | -----TIVVELMKSSLEDPKMVSCVLNGM-LDQSFRQRTIRK--          | 1634              |
| STERLET      | -----TTVAQLMKSAANPKMVSMVLNGM-LDQSFRERSVRK--           | 1635              |
| GAR          | -----STVPQLMSLAAENPKMVSAVLNGM-LDQSFRDRSVRE--          | 1622              |
| LATIMERIA    | -----TAVSQLMNSAAENPKMVGAIVLNGM-LDQSFRNRTVRK--         | 1623              |
| CAECIL       | -----TAILQLMKSSVDNPRMVGTIIVLNGM-LDQCFRDRTVRK--        | 1625              |
| SNAKE        | -----IAVLELMKSALDSPKMVSTVLNGM-LDQSFKDRATCK--          | 1623              |
| CANARY       | -----VFIIVRLMKSSISNPQMVGSIVLNGM-LDQSFRDRAVRK--        | 1614              |
| OSTRICH      | -----VIILQLMESSVSNPQMVGSIVLNGM-LDQSFRERTIRK--         | 1584              |
| GECKO        | -----VAVLHLKSSLDSPKMVGTIIVLNGM-LDQSFRDRAVHK--         | 1623              |
| TURTLE       | -----VAIVLQLMKSSVDSPKMVGTIIVLNGM-LDQSFRERAVRK--       | 1623              |
| ALLIGATOR    | -----VAIVLQLMKSAVDNPRMVGTIIVLNGM-LDQSFRERTVRK--       | 1581              |
| PLATYPUS     | -----TAVLELMKSSVDNAKMGVTIIVLNGM-LDQSFRDRIVRK--        | 1616              |
| TASDEVIL     | -----TAILELMKSSVDNAKMGVAIVLNGM-LDQSFRDRAVRK--         | 1619              |
| <b>HUMAN</b> | <b>-----LAVLELMQSSVDNTKMVSAVLNGM-LDQSFRERANQK--</b>   | <b>1612</b>       |
| MOUSE        | -----IAVSRLMESSSDNPKMVSTVLNGM-LDTSFRDRAVQK--          | 1609              |
| CRASSO2      | -----QAVPVLCEHAQKQCYRVMSILVMT-VDTVSKDKNLRK--          | 1601              |
| POMACEA      | -----DVVSLMNKATVDPHRVCNVLVAM-LENVAQDRRIRK--           | 1608              |
| TRICHOPLAX   | -----RCLPMILDLAASKSFMISGILSGL-LDFILDRGLRQ--           | 1595              |
| NEMATOSTELLA | -----SHIPQLVSMATSYSSHVCSILNSI-LDQFNDRKTSRK--          | 1605              |
| PRIAPULA     | -----VLIIPKVLDRINNRESVVMTILTDL-LDQVGKDRETRK--         | 1618              |
| SOFTCORAL    | -----EHLPKILEYNRDEAQVVSSTVIAL-LDSMVKDKELRK--          | 1614              |
| PISTILLATA   | -----IHMANILMKAASSPFLVLSLNGI-LDQVIRDKILRT--           | 1633              |
| HEMICHOR     | -----EVVPLLLRHVVADSTIVSTIIVLNGM-LDHITNNRELK--         | 1638              |
| BELCHER      | -----ESLPVLLQQLTAEPVWVGSILHGL-LDHLAKDKTLRK--          | 1638              |
| STRONG       | -----DTVYELSNRVREDRGTIGMIYGL-LEHAVGNREIRK--           | 1639              |
| STARFISH     | -----KVIPLLVREGGKDVTVVSSVLNGL-LDYLTSSREVR--           | 1644              |

: : . :

Supplementary Figure 9: Clustal Omega: DNA-PKcs alignment metazoan plus "putative archaeon"

|              |                                                                                                                                                                                                                                                         | <b>RYG70450.1</b> |
|--------------|---------------------------------------------------------------------------------------------------------------------------------------------------------------------------------------------------------------------------------------------------------|-------------------|
| ARCHAEON     | -----LLESRVNLTTL---SS---SAILQLAT <b>LLA</b> QVTAITSRLCEC----RA                                                                                                                                                                                          | 1687              |
| MUDCRAB      | ---KHSVKVQ <b>AF</b> LHHWSTYST <b>EAG</b> KSS---IHQESVLD <b>LLSSL</b> FLVDREGTMKAHCSAE                                                                                                                                                                  | 1637              |
| SCORPION     | ---RYGKDIINS <b>IMCQ</b> WSRLQ <b>QC</b> LEESC-DIDLQNDIIT <b>LLT</b> KMFLIDSSFIKGNVN-YD                                                                                                                                                                 | 1652              |
| SPONGE       | NNKETVETLCTEL <b>I</b> SHWQDLSLWWEDGS--KDLKSAAVT <b>LLQ</b> KI <b>I</b> ALKPKLLLSAD--V                                                                                                                                                                  | 1673              |
| CAPITELLA    | ---SHGKMVSRA <b>I</b> VSQWSSLSVW <b>W</b> SESTASLDTKMVAIT <b>LLT</b> KLMQIDSTVIIDVKN-KS                                                                                                                                                                 | 1663              |
| DANIO        | ---SQGSQ <b>LAEQ</b> VLK <b>GW</b> DLLRPWWDGPAAT <b>PESK</b> TSVLS <b>LLAK</b> VLQIDSSVCSNTSH-PA                                                                                                                                                        | 1678              |
| MILII        | ---TQGVLLVSA <b>VL</b> TNWTRLES <b>W</b> SENS-SAESKMAVLT <b>LLS</b> KVLQIDSSVSFSSNH-EA                                                                                                                                                                  | 1674              |
| BAMBOO       | ---KQGIYLVSA <b>VL</b> SNWAKLDS <b>W</b> SVKS-SPE <b>SK</b> MAVLT <b>LLS</b> KVLQIDSSVSFGNSH-DA                                                                                                                                                         | 1673              |
| XENOPUS      | ---QQGVKLVA <b>VL</b> ENWRRLDS <b>W</b> YKDS-P <b>ESK</b> MAVLT <b>LLAK</b> VLQIDSSVCFDINH-SA                                                                                                                                                           | 1689              |
| STERLET      | ---TQGSQ <b>LVGG</b> VLG <b>SW</b> TSLS <b>W</b> ASSS-SAESKMA <b>ALT</b> <b>LLS</b> KVLQIDSSVSFNTSH-LA                                                                                                                                                  | 1690              |
| GAR          | ---SQGRQLV <b>KRV</b> TQAWSSLS <b>W</b> SSPAST <b>SESK</b> MAT <b>LLT</b> <b>S</b> KVLQIDSSVCFNVNH-EA                                                                                                                                                   | 1678              |
| LATIMERIA    | ---QQGSQ <b>LVDT</b> VLQ <b>NW</b> TKLSS <b>W</b> IRSS-S <b>PE</b> SKMA <b>ALT</b> <b>LLS</b> KVLQIDSSVSFNPNH-AA                                                                                                                                        | 1678              |
| CAECIL       | ---QQGV <b>KM</b> VIA <b>VL</b> Q <b>NW</b> KKLDS <b>W</b> DKNS-AP <b>ESK</b> MAVLT <b>LLAK</b> VLQIDSSVSSNAHH-EA                                                                                                                                       | 1680              |
| SNAKE        | ---QQGVKLVA <b>IL</b> KN <b>W</b> GHLDH <b>W</b> AKDA-S <b>PE</b> SKMSVLT <b>LLAK</b> VLQIDSSVSFT-HH-EA                                                                                                                                                 | 1677              |
| CANARY       | ---QQGAKLVTA <b>VL</b> R <b>NW</b> EKLDG <b>W</b> WAKGS-SA <b>ESK</b> MALL <b>LLAK</b> VLQIDSSVSFNTNH-EA                                                                                                                                                | 1669              |
| OSTRICH      | ---QQGVKLVT <b>AV</b> LR <b>NW</b> RLDS <b>W</b> WAKGS-AP <b>ESK</b> MAVLT <b>LLAK</b> VLQIDSAVSFNTNH-EA                                                                                                                                                | 1639              |
| GECKO        | ---QQGVKLVA <b>IL</b> KN <b>W</b> VHLDN <b>W</b> TRDS-AP <b>ESK</b> MAVLT <b>LLAK</b> VLQIDSSVSFSTQH-EA                                                                                                                                                 | 1678              |
| TURTLE       | ---QQGIKLVT <b>AV</b> LR <b>NW</b> MRLDS <b>W</b> WAKDS-AP <b>ESK</b> MAVLT <b>LLAK</b> VLQIDSSVSFNTNH-EA                                                                                                                                               | 1678              |
| ALLIGATOR    | ---QQGMKLVTA <b>VL</b> R <b>NW</b> MRLDT <b>W</b> WAKDS-AP <b>ESK</b> MAVLT <b>LLAK</b> VLQVDSSVSFNTKH-EA                                                                                                                                               | 1636              |
| PLATYPUS     | ---QQGEKL <b>VDA</b> ILQ <b>NW</b> KRLDT <b>W</b> WAE <b>DS</b> -T <b>PE</b> SKIAVLT <b>LLAK</b> VLQIDSSVSSNTNH-AA                                                                                                                                      | 1671              |
| TASDEVIL     | ---QQGMKLVAT <b>IL</b> Q <b>NW</b> KKLDT <b>W</b> WAKDS-V <b>PE</b> SKMAVLT <b>LLAK</b> ILQIDSSVSFSINH-GA                                                                                                                                               | 1674              |
| <b>HUMAN</b> | --- <b>HQGLKLATTILQH</b> WKK <b>CDS</b> W <b>W</b> AKDS- <b>P</b> LE <b>T</b> KMAV <b>LALLAKIL</b> QIDSSVSFNTSH- <b>GS</b>                                                                                                                              | <b>1667</b>       |
| MOUSE        | ---HQGLKLATA <b>IL</b> Q <b>NW</b> RK <b>CDS</b> W <b>W</b> APDS-AP <b>ESK</b> TTVLS <b>LLAK</b> M <b>LQ</b> IDSALSFDTNH-SS                                                                                                                             | 1664              |
| CRASSO2      | ---QISANVVTS <b>V</b> VEK <b>W</b> KS <b>I</b> SS <b>W</b> CLA-T--PE <b>L</b> HSMAM <b>LLLTK</b> L <b>V</b> LLDSKVVT <b>D</b> SSS-GH                                                                                                                    | 1654              |
| POMACEA      | ---SNGPRIVDM <b>V</b> ASK <b>W</b> HHLES <b>W</b> QAGS--SD <b>LQ</b> GLAV <b>LLLTK</b> LL <b>V</b> DSKAVLN <b>V</b> EK-SH                                                                                                                               | 1662              |
| TRICHOPLAX   | ---SKGIHIS <b>KIL</b> SS <b>W</b> NSL <b>K</b> C <b>W</b> W <b>L</b> TPD-AQ <b>D</b> LLQ <b>I</b> SVN <b>ILN</b> K <b>CL</b> T <b>L</b> DPQ <b>F</b> ATQ <b>S</b> ND-SS                                                                                 | 1650              |
| NEMATOSTELLA | ---RYGS <b>V</b> CAS <b>I</b> VNS <b>W</b> EV <b>F</b> SS <b>L</b> W <b>D</b> MSS-S <b>S</b> EL <b>K</b> Q <b>A</b> LL <b>EIM</b> K <b>L</b> LLSD <b>P</b> K <b>L</b> ID <b>P</b> AK-PA                                                                 | 1660              |
| PRIAPULA     | ---RYGSGVVNT <b>VL</b> Q <b>C</b> W <b>GH</b> LRDL <b>W</b> VATS-TP <b>D</b> R <b>K</b> D <b>M</b> LL <b>MLLR</b> K <b>L</b> LLIDSSVAT <b>K</b> G <b>S</b> H-SA                                                                                         | 1673              |
| SOFTCORAL    | ---MNGR <b>K</b> MT <b>TV</b> LL <b>ES</b> W <b>ER</b> LS <b>H</b> W <b>W</b> ENG <b>G</b> -E <b>E</b> L-K <b>R</b> ST <b>A</b> IL <b>IRN</b> IL <b>I</b> V <b>D</b> PK <b>L</b> SE <b>V</b> K---S                                                      | 1666              |
| PISTILLATA   | ---R <b>NG</b> SS <b>F</b> AV <b>LL</b> LN <b>N</b> W <b>T</b> S <b>F</b> E <b>I</b> F <b>W</b> R <b>T</b> H <b>S</b> -A <b>M</b> DL <b>R</b> H <b>S</b> IL <b>MLL</b> K <b>M</b> L <b>I</b> LD <b>P</b> AK <b>V</b> T <b>D</b> C <b>N</b> R-L <b>T</b> | 1688              |
| HEMICHOR     | ---K <b>K</b> GL <b>T</b> V <b>H</b> AA <b>IL</b> SN <b>W</b> SS <b>L</b> K <b>S</b> W <b>W</b> SE <b>G</b> A-T <b>H</b> D <b>Q</b> R <b>S</b> ST <b>L</b> IL <b>L</b> K <b>L</b> LQIDSK <b>F</b> AS <b>D</b> PTH-AA                                    | 1693              |
| BELCHER      | ---K <b>E</b> GAAL <b>C</b> DS <b>LL</b> Q <b>S</b> W <b>P</b> K <b>L</b> AP <b>W</b> EE <b>G</b> A-L <b>Q</b> DS <b>K</b> ST <b>A</b> L <b>TLLR</b> K <b>I</b> L <b>I</b> IDS <b>Q</b> VSR <b>D</b> PAH-PA                                             | 1693              |
| STRONG       | ---RYG <b>M</b> AI <b>Y</b> SA <b>VL</b> TQ <b>W</b> DT <b>L</b> SNL-----G <b>Q</b> ED <b>D</b> F <b>M</b> LN <b>MLK</b> V <b>L</b> QID <b>F</b> K <b>F</b> AT <b>D</b> PTH-PT                                                                          | 1688              |
| STARFISH     | ---THG <b>M</b> SV <b>H</b> SA <b>IL</b> TQ <b>W</b> D <b>I</b> LM <b>G</b> GL <b>K</b> K <b>G</b> C-ST <b>D</b> LQ <b>S</b> F <b>A</b> LL <b>MLR</b> K <b>L</b> LQIDAK <b>F</b> VSD <b>T</b> TH-PV                                                     | 1699              |

. : :

Supplementary Figure 9: Clustal Omega: DNA-PKcs alignment metazoan plus "putative archaeon"

|              |                                                                    | <b>RYG70450.1</b> |
|--------------|--------------------------------------------------------------------|-------------------|
| ARCHAEON     | LR TYMLHELM LTFDNP KD VTKV VQCLSW LPLLLPGCTTSSSRSLSLVDMQGEAAELARVQ | 1747              |
| MUDCRAB      | DAGVLK FYRRLLIEDKATLSMKNKALKLLPFFLT-----MSKQVSKSIS                 | 1681              |
| SCORPION     | SNSIFFSFITLLQKSEMSLEFKICVLDLLPFFLC-----DAFLCKVQ                    | 1694              |
| SPONGE       | SKPLVDMYTAMIGDEKLELNFKAVMIDLLPSFLL-----LSS-PEHQSQLK                | 1718              |
| CAPITELLA    | FYYVFKMFLGLISDKNNTLQFKTRVLDLLIFFCN-----LPAEENKQLE                  | 1707              |
| DANIO        | FNAVFTTFTALLTDVSMPLNLKSQALIMLPFFTA-----LPSMPLEELR                  | 1722              |
| MILII        | FAMVFHTYTTILT DSTLALNLKSQAMIILPFFAH-----LPEENLAVLR                 | 1718              |
| BAMBOO       | FSMVFQTYTTILT DSTLALNLKTKAVIILPFFTO-----LPEENLVTLK                 | 1717              |
| XENOPUS      | FAEVFKTYTSILTDQKLG LNLKSQAI IILPFFTK-----LTGEKLT ELK               | 1733              |
| STERLET      | FAVVFSTYTTLVTDSTLPLNLKSQALIILPFFTN-----LLGSTLADLH                  | 1734              |
| GAR          | FEAVFTTYTALITDSALPLNLKNHGLIILPFFTN-----LPESTLAE LQ                 | 1722              |
| LATIMERIA    | FPAVFNTYTTLLTDQTLALNLKSQAVIVLPFFTN-----LPEDHLADLK                  | 1722              |
| CAECIL       | FSAVFNTYTSILTDQKLG LNLKSQAI IILPFFTN-----LTGDSLNDLK                | 1724              |
| SNAKE        | FPNVFNTYTCLLMDQKLG LHLKSQAI IILPFFTE-----LVGEGLHKLK                | 1721              |
| CANARY       | FTAVFNTYTSLLTDQNLG LNLKGQAVI IILPFFTN-----LTGEKLN DLK              | 1713              |
| OSTRICH      | FTAVFSTYTSLLIDQNLG LNLKSQAMI IILPFFTN-----LTGEKLN DLK              | 1683              |
| GECKO        | FSDVFNTYTSLLTDQNLG LNLKSQAVI IILPFFTN-----LVGERLV DLK              | 1722              |
| TURTLE       | FSAVFNTYTSLLIDRNLG LNLKSQAVI IILPFFTN-----LTGDRISELK               | 1722              |
| ALLIGATOR    | FFAVFNTYTSLLVDQNLG LNLKSQAVV IILPFFTN-----LTGERL KELK              | 1680              |
| PLATYPUS     | FSAVFNAYTSLLIDKKLG LNLKSQAVL IILPFFTN-----LTGDRLN DLK              | 1715              |
| TASDEVIL     | FLDVFTTYTSLLDDPKLG LNLKGQALI IILPFFTN-----LTGERLEDLK               | 1718              |
| <b>HUMAN</b> | <b>FPEVFTTYISLLADTKLDLHLKGQAVTLLPFFTS-----LTGGSLEELR</b>           | <b>1711</b>       |
| MOUSE        | FSEIFTTYASLLADTKLGLHLKGQAI IILPFFTS-----LREGSLENLK                 | 1708              |
| CRASSO2      | FPEVFETYLSMLTEKKTLSVKCKILELLPFFAT-----LPEPHLKKLK                   | 1698              |
| POMACEA      | FTTVFTSYCTILAEKKTNLAFKNRALDVLPFFAA-----VPDAKL---K                  | 1703              |
| TRICHOPLAX   | FETVFNFFLSLLSGTSTSLAFKKYVLDLHFFLV-----SSDKRIREL R                  | 1694              |
| NEMATOSTELLA | FQIVLKMFTSVFDDKNLT LTFKSRAVELFPYFKN-----LPDNYQSQLK                 | 1704              |
| PRIAPULA     | HRDVYDTYCCLLDVAGTSLAFKTRVMELH FYCE-----LPEQETTKLR                  | 1717              |
| SOFTCORAL    | SRGMFKTYNGLLKDKTITLTVKIQCLELLPCFTS-----ATIPSEQTEAL R               | 1712              |
| PISTILLATA   | FPSLFEMYL LYLKDKSTTLAFKQVLELLPYFTK-----STEEYLRR LK                 | 1732              |
| HEMICHOR     | FKPVFDMYLN MVTD SNTSLAFKSRVLEI LYFFTR-----IPEQELSL LQ              | 1737              |
| BELCHER      | FQPVF TMYLDMLTDSRSTLPFKSQVLDLLPFFTV-----LPQTQLAELK                 | 1737              |
| STRONG       | FRPVFNQYLSMLRDSKKS LAWKTQVLDVLYFFAN-----VPEKEEKELK                 | 1732              |
| STARFISH     | FSSVLEAYSFMLTDASTSLTFKAQVMDV LFFFTS-----LPDGEQTKLR                 | 1743              |

: : :

Supplementary Figure 9: Clustal Omega: DNA-PKcs alignment metazoan plus “putative archaeon”

|              |                                                                                                                                                                                            | <b>RYG70450.1</b> |
|--------------|--------------------------------------------------------------------------------------------------------------------------------------------------------------------------------------------|-------------------|
| ARCHAEON     | EGLENLVSTR <b>FPLDSSQL</b> PVSSSQKEFLVILEAYLQAFQACGS <b>VI</b> MLPPLYPALREGK-                                                                                                              | 1806              |
| MUDCRAB      | ED <b>LEMV</b> SFKH <b>FPMQ</b> SSEFPVGGSRDRDYHQALSEILTAL <b>ELSL</b> SE <b>LLKFI</b> LQVFCNED-                                                                                            | 1740              |
| SCORPION     | AAL <b>NDL</b> FTNH <b>FPLY</b> SS <b>SELK</b> PGSSQYNDYHLAFTKLLIAL <b>EL</b> TGN <b>EMLLK</b> FVIQIMCRES-                                                                                 | 1753              |
| SPONGE       | G <b>SLN</b> R <b>LV</b> SLQ <b>FPLT</b> SS <b>EL</b> PAGGPLLNEYTNIIEKLCNS <b>LV</b> ASG <b>SLV</b> LE <b>LI</b> INIMCREV-                                                                 | 1777              |
| CAPITELLA    | S <b>CLN</b> Q <b>FV</b> ADCF <b>PM</b> SS <b>LE</b> FHAGSQQQKCYIT <b>AL</b> DRLL <b>LAM</b> ELSG <b>SLM</b> LL <b>NLI</b> ISVICKEV-                                                       | 1766              |
| DANIO        | RA <b>LES</b> LVATH <b>FPMQ</b> SDEFPRGSLQCN <b>NY</b> MDCIRKFLEALQ <b>LSQ</b> S <b>P</b> LL <b>LKL</b> MARVLCRDK-                                                                         | 1781              |
| MILII        | HA <b>LDQ</b> FVA <b>AHF</b> PM <b>K</b> SDEF <b>PK</b> GT <b>LK</b> YNNYVDAIKK <b>LDA</b> LELSQ <b>S</b> P <b>MLL</b> KL <b>MIA</b> ILCRDS-                                               | 1777              |
| BAMBOO       | NA <b>LN</b> H <b>FI</b> ASH <b>FPMK</b> SDEF <b>PK</b> GT <b>LR</b> YNNYVDCVKK <b>LDA</b> LELSQ <b>S</b> P <b>LL</b> Q <b>IL</b> TEVLCRDN-                                                | 1776              |
| XENOPUS      | NT <b>LDQ</b> FVAS <b>NF</b> PM <b>K</b> SDEF <b>PK</b> GT <b>LF</b> FNNYVDCIKK <b>FDA</b> LELSQ <b>S</b> P <b>MLL</b> Q <b>LM</b> TEILCRDE-                                               | 1792              |
| STERLET      | NA <b>LE</b> V <b>LV</b> ASH <b>FPMQ</b> SDEF <b>PK</b> GT <b>LR</b> YNNYIDSIKK <b>FDA</b> LELSQ <b>S</b> P <b>MLL</b> KL <b>MT</b> GILCRDN-                                               | 1793              |
| GAR          | RA <b>LE</b> M <b>LV</b> ASH <b>FPI</b> SSDEF <b>PK</b> GT <b>LR</b> YNNYVDTIKK <b>FDA</b> LELSQ <b>N</b> P <b>MLL</b> KL <b>MAE</b> ILCRDK-                                               | 1781              |
| LATIMERIA    | NA <b>LDQ</b> LVAF <b>NF</b> PM <b>K</b> SDEF <b>PK</b> GT <b>LK</b> YNNYVDCIKK <b>FDA</b> LELSQ <b>S</b> P <b>MLL</b> RL <b>MTE</b> ILCRDS-                                               | 1781              |
| CAECIL       | NA <b>LDQ</b> LVAF <b>NF</b> PL <b>K</b> SDEF <b>PK</b> GT <b>LK</b> YNNYVDCVKK <b>FDA</b> LELSQ <b>S</b> T <b>MLL</b> KL <b>MTE</b> ILCRDT-                                               | 1783              |
| SNAKE        | HA <b>LDQ</b> LVAY <b>NF</b> PL <b>T</b> SDEF <b>PK</b> GT <b>LK</b> YNNYVDCVKK <b>FDA</b> LELSQ <b>N</b> ST <b>LLE</b> LMTEILCRDN-                                                        | 1780              |
| CANARY       | NA <b>LDQ</b> LVAF <b>NF</b> PM <b>K</b> SDEF <b>PK</b> GT <b>LK</b> HNNYVDC <b>TK</b> KK <b>FDA</b> LELSQ <b>S</b> P <b>MLL</b> Q <b>LM</b> TEILCRDN-                                     | 1772              |
| OSTRICH      | NA <b>LDQ</b> L <b>IA</b> F <b>NF</b> PM <b>R</b> SDEF <b>PK</b> GT <b>LK</b> HNNYVDC <b>TK</b> KK <b>FDA</b> LELSQ <b>S</b> P <b>MLL</b> Q <b>LM</b> TEVLCRDH-                            | 1742              |
| GECKO        | NV <b>LDQ</b> FVAF <b>NF</b> PL <b>R</b> SNE <b>F</b> PK <b>GT</b> LR <b>YNN</b> FVDC <b>TK</b> KK <b>FDA</b> LELSQ <b>S</b> P <b>MLL</b> Q <b>LM</b> TEILCRDH-                            | 1781              |
| TURTLE       | NA <b>LDQ</b> LVAF <b>NF</b> PM <b>K</b> SDEF <b>PK</b> GT <b>LR</b> YNNYVDC <b>TK</b> KK <b>FDA</b> LELSQ <b>S</b> P <b>MLL</b> Q <b>LM</b> TEILCRDH-                                     | 1781              |
| ALLIGATOR    | DA <b>LDQ</b> LVAF <b>NF</b> PM <b>K</b> SDEF <b>PK</b> GT <b>LR</b> YNNYVDC <b>TK</b> KK <b>FDA</b> LELSQ <b>S</b> P <b>LL</b> Q <b>LM</b> TEILCRDH-                                      | 1739              |
| PLATYPUS     | NA <b>LE</b> Q <b>F</b> VAF <b>NF</b> PM <b>N</b> SDEF <b>PK</b> GT <b>LR</b> YNNYVDC <b>TK</b> KK <b>FDA</b> LELSQ <b>S</b> P <b>MLL</b> Q <b>LM</b> TEILCRDQ-                            | 1774              |
| TASDEVIL     | LA <b>LE</b> K <b>LV</b> AS <b>NF</b> PM <b>T</b> SE <b>HF</b> VQ <b>GT</b> LK <b>YNN</b> YVDC <b>TK</b> KK <b>FDA</b> LELSQ <b>S</b> P <b>MLL</b> Q <b>FM</b> TEILCRDQ-                   | 1777              |
| <b>HUMAN</b> | <b>RVLE</b> Q <b>L</b> IV <b>AHF</b> PM <b>Q</b> S <b>RE</b> F <b>PP</b> G <b>TP</b> RF <b>NN</b> YVDC <b>MK</b> KK <b>FDA</b> LELSQ <b>S</b> P <b>MLL</b> EL <b>MTE</b> VLCREQ-           | <b>1770</b>       |
| MOUSE        | HI <b>LE</b> K <b>L</b> IVC <b>NF</b> PM <b>K</b> SDEF <b>PP</b> DSL <b>K</b> YNNYVDC <b>MK</b> KK <b>FDA</b> LELSQ <b>S</b> P <b>ML</b> F <b>Q</b> LM <b>TD</b> ILCREQ-                   | 1767              |
| CRASSO2      | RS <b>LD</b> RLVAD <b>H</b> F <b>PI</b> K <b>ST</b> DL <b>PE</b> SS <b>PH</b> FKDYIAAIDRLL <b>TS</b> LELSG <b>SEM</b> LL <b>ELL</b> ISIFCREP-                                              | 1757              |
| POMACEA      | DV <b>LD</b> GLVAD <b>NF</b> PL <b>R</b> S <b>SEL</b> TK <b>G</b> TPRFVDYISAIDKLL <b>SAL</b> ELSS <b>SLV</b> LE <b>LL</b> ISIFCREEG                                                        | 1763              |
| TRICHOPLAX   | EH <b>LD</b> RMIVDK <b>FPL</b> KS <b>A</b> EFV <b>VG</b> SPDYNDYVACIDKLL <b>AN</b> L <b>IK</b> SG <b>NLM</b> LL <b>EV</b> LISVMCREK-                                                       | 1753              |
| NEMATOSTELLA | SC <b>ID</b> TLVTD <b>NF</b> PL <b>K</b> ST <b>E</b> FIP <b>G</b> SPRYNDYIATLDKLL <b>VMT</b> SG <b>SLV</b> LL <b>Q</b> VITAVLCREE-                                                         | 1763              |
| PRIAPULA     | EN <b>LD</b> RMVAD <b>FF</b> PL <b>R</b> SS <b>DF</b> IV <b>G</b> SPKYHDYVAAMS <b>QL</b> LD <b>VM</b> EVSG <b>STM</b> LL <b>RL</b> VISIVCREP-                                              | 1776              |
| SOFTCORAL    | SAL <b>K</b> TL <b>IA</b> DN <b>FPL</b> SS <b>K</b> EF <b>N</b> EN <b>N</b> PKYS <b>DY</b> IAALDKIL <b>SAL</b> VISG <b>SLM</b> LF <b>DL</b> LLISIVCREE-                                    | 1771              |
| PISTILLATA   | E <b>GL</b> NA <b>F</b> V <b>T</b> NN <b>I</b> PL <b>K</b> ST <b>E</b> F <b>V</b> T <b>G</b> GPQYNDYVQ <b>T</b> IDKLL <b>AAF</b> VNS <b>RS</b> L <b>IL</b> LE <b>V</b> L <b>IA</b> IFCRER- | 1791              |
| HEMICHOR     | GR <b>LN</b> R <b>L</b> IA <b>DN</b> F <b>PL</b> KS <b>S</b> EFV <b>VG</b> SPKYNDYVA <b>AF</b> GKIL <b>SAL</b> VISG <b>SLM</b> LL <b>ELL</b> ISIMCREP-                                     | 1796              |
| BELCHER      | AR <b>LD</b> RMVAD <b>NF</b> PL <b>K</b> S <b>A</b> EF <b>P</b> AGSSKYNDYV <b>G</b> AV <b>TK</b> LL <b>SAL</b> ELSS <b>SLM</b> LL <b>ELL</b> ISVMCREA-                                     | 1796              |
| STRONG       | SAL <b>D</b> LLVAN <b>H</b> F <b>PL</b> KS <b>T</b> D <b>L</b> EAGSPRYNDY <b>I</b> MA <b>LN</b> KIL <b>TS</b> LVMSG <b>SLM</b> LL <b>EL</b> I <b>S</b> ILCRDD-                             | 1791              |
| STARFISH     | SAL <b>D</b> RLVAD <b>NF</b> PL <b>N</b> S <b>S</b> EF <b>R</b> VGSPKYIDY <b>A</b> GAL <b>N</b> KIL <b>TAM</b> VLSG <b>NLM</b> LL <b>E</b> IVISIMCRDE-                                     | 1802              |
|              | : . . : * : * : : . : : . : : : . .                                                                                                                                                        |                   |

Supplementary Figure 9: Clustal Omega: DNA-PKcs alignment metazoan plus "putative archaeon"

|              |                                                                                          | <b>RYG70450.1</b> |
|--------------|------------------------------------------------------------------------------------------|-------------------|
| ARCHAEON     | QHIIYYQSF <sup>I</sup> KIVISS <sup>V</sup> PKSLPSLPPTDTMEHSGSEHLYTEVKHICNFCLEVIYNVYQD--- | 1863              |
| MUDCRAB      | KHRYEEAF <sup>N</sup> ESIE <sup>K</sup> FIKRQQVS--KQ-----IDTLRFVYDMYAN-QS                | 1779              |
| SCORPION     | THLLEENIQKCLKKLCKRTDSN--KE-----RLIAEVPLKMFLE-DE                                          | 1792              |
| SPONGE       | RHVCEEKI <sup>Q</sup> TSLHQ <sup>F</sup> ISKLSED---G-----VDALKFVYEMFKN-DK                | 1815              |
| CAPITELLA    | KHTHENAI <sup>Q</sup> SAF <sup>Q</sup> R <sup>F</sup> IKRLPKD--KH-----KLALDVPYKIFSQ-EG   | 1805              |
| DANIO        | KHIMEELF <sup>Q</sup> ACF <sup>Q</sup> KIAHQSYLG--KQ-----VLLLSSTYQSFQA-KE                | 1820              |
| MILII        | RHVMEEGF <sup>Q</sup> VC <sup>F</sup> QRLAKTGSCE--KQ-----VALLEAVYGMFEN-EG                | 1816              |
| BAMBOO       | RHVMEEF <sup>Q</sup> IC <sup>F</sup> QNI <sup>A</sup> KRGTC--KQ-----VALLEAAYEMFRN-EE     | 1815              |
| XENOPUS      | RHFMEELF <sup>Q</sup> SSF <sup>K</sup> KVIKRSSCD--TQ-----VILLNTLHNMFKS-ES                | 1831              |
| STERLET      | KHVMEELF <sup>Q</sup> TC <sup>F</sup> KRIARRGSC--KQ-----VSLLDTVYQMFQ-DE                  | 1832              |
| GAR          | KHVTEELF <sup>Q</sup> AC <sup>F</sup> KRIARRSGC--RQ-----VVLLETVYEMFQA-GE                 | 1820              |
| LATIMERIA    | KHCLEELFL <sup>R</sup> CF <sup>K</sup> KIVRRGSCD--RQ-----VTLLDTPVYKMFQD-EG               | 1820              |
| CAECIL       | KHFMEELFL <sup>T</sup> S <sup>F</sup> KRIARRGNCD--KQ-----VALLETVHDMFKT-EN                | 1822              |
| SNAKE        | KHIMEELF <sup>E</sup> INL <sup>K</sup> RIAKRGSC--RQ-----VLLLDTPVHQMFS-ET                 | 1819              |
| CANARY       | RHFMEDLF <sup>Q</sup> AS <sup>F</sup> KRISRRSPTD--KQ-----VLLLDTPVHQMFS-EE                | 1811              |
| OSTRICH      | RHFMEGLF <sup>Q</sup> AS <sup>F</sup> KRISRRNSD--RQ-----VLLLDTPVHQMFS-ED                 | 1781              |
| GECKO        | RHIMEEQF <sup>E</sup> IS <sup>F</sup> IRIARRGSCY--KQ-----VLLLDTPVHQMFS-ET                | 1820              |
| TURTLE       | RHFMEDLF <sup>Q</sup> TS <sup>F</sup> KRISRRSSYE--KQ-----VLLLDTPVHQMFS-EA                | 1820              |
| ALLIGATOR    | RHCMEDLF <sup>Q</sup> TS <sup>F</sup> KRVIKRSDCN--KQ-----VLLLDTPVYKMFQS-ES               | 1778              |
| PLATYPUS     | RHFMEELF <sup>Q</sup> MS <sup>F</sup> KRIARRSGSA--KQ-----VALLEAVHGMFLR-DD                | 1813              |
| TASDEVIL     | RHVIEELF <sup>Q</sup> TF <sup>F</sup> QRISKRSSA--TQ-----VALLDTPVHRMFQK-DD                | 1816              |
| <b>HUMAN</b> | <b>QHVMEELF<sup>Q</sup>SSF<sup>R</sup>RIARRGSCV--TQ-----VGLLESVYEMFRK-DD</b>             | <b>1809</b>       |
| MOUSE        | RHIMEELF <sup>Q</sup> TF <sup>F</sup> KRIARQSPCV--TQ-----LNLESVYTMFRK-AD                 | 1806              |
| CRASSO2      | KHVYETK <sup>I</sup> LES <sup>I</sup> NR <sup>F</sup> TRRVPAA--KQ-----KSMVDVAYNIFCQ-EK   | 1796              |
| POMACEA      | RHVHEDAI <sup>Q</sup> QSLN <sup>T</sup> FTARLPAE--KQ-----KDALDVPYKIVFC-ES                | 1802              |
| TRICHOPLAX   | KHAYEEQ <sup>I</sup> QKSL <sup>L</sup> LFISS <sup>L</sup> IPKDA-----LGALDVPFKMFVD-DK     | 1792              |
| NEMATOSTELLA | RHVHEEE <sup>I</sup> QKSLA <sup>A</sup> FIQRLAPSSSLV-----KGAVDVTYRIFTN-ER                | 1804              |
| PRIAPULA     | KHAMHDQL <sup>Q</sup> TSLSR <sup>F</sup> IHR <sup>L</sup> SAD--KQ-----KLAADSGYSILAE-EG   | 1815              |
| SOFTCORAL    | SHSHEEE <sup>I</sup> QIQ <sup>F</sup> AK <sup>F</sup> IKRLKLQ--QA-----RKALDICFDVFTKKDT   | 1811              |
| PISTILLATA   | QHVHEDQ <sup>I</sup> QSF <sup>I</sup> AF <sup>I</sup> QRLHPEPDQA-----KAAMDVCLSIFFN-ER    | 1832              |
| HEMICHOR     | KHVCEDE <sup>I</sup> QASL <sup>I</sup> TFIKHLPAD--KQ-----KPAVDVAFDVFHK-EN                | 1835              |
| BELCHER      | KHVMEDE <sup>I</sup> QTSLSR <sup>F</sup> IKGMGAD--RQ-----KPALDIPYGIFRR-EG                | 1835              |
| STRONG       | KHSYEDK <sup>I</sup> QGAL <sup>S</sup> FAKRLPSE--KQ-----SAAANIPFEIFKQ-DK                 | 1830              |
| STARFISH     | KHAYEDE <sup>I</sup> QESL <sup>A</sup> AFIKRLPEE--KQ-----TAAFVAVYQIFCQ-EN                | 1841              |
|              | * : : .                                                                                  |                   |

Supplementary Figure 9: Clustal Omega: DNA-PKcs alignment metazoan plus “putative archaeon”

|              |                                                                 | <b>RYG70450.1</b> |
|--------------|-----------------------------------------------------------------|-------------------|
| ARCHAEON     | ---VPIKRILLEFLLLPPTLLSLSSKNMVVLFSLGYHRGLQIRMSSVSSDHSI IKVLHDI I | 1920              |
| MUDCRAB      | HLKQNLRYNIMEKVLIIPLLQLSDLTVTVSFSIDV-----IKPVMAGM                | 1821              |
| SCORPION     | LYPDMRIHIIIEKVFRVILGMISKITLKYFFIDH-----IKEIMQIV                 | 1834              |
| SPONGE       | DFPVAAVKIGIGERLCVPLFTECSSAVLLEFFVLK-----ISDVMCIM                | 1857              |
| CAPITELLA    | RFTNNQRRRAACEKVSLSLMRLVHSSALTEFYCEH-----IKEIMKII                | 1847              |
| DANIO        | VPSNFMLMGLIDRVLLPLASHCSPQALSQFFISN-----IADIMTTL                 | 1862              |
| MILII        | GLSNIARQSVMDRSLTLITHCSLDALKEFISKI-----IKDAMGIL                  | 1858              |
| BAMBOO       | MLPNATRQFAMDRSLTLIGHCSPDALREFFCKI-----VKDAMEIL                  | 1857              |
| XENOPUS      | LMLNGTLQSLIDRCLLTLWNCSLDAMISFFTNI-----ISLAMDTL                  | 1873              |
| STERLET      | LHSNTARQAVLDRSLTLTLHCSSDALKEFFCTT-----VGDIMGTL                  | 1874              |
| GAR          | LASGAMRQAVLDRVLLTLVLHCSSDALRGFFCKT-----IASVMETL                 | 1862              |
| LATIMERIA    | LLSNTTRQAIMDRFTFLTIMLNCSIDALKEFLCKN-----ILDVMGTL                | 1862              |
| CAECIL       | LWSNTTRQTIVDKSLLLIWHCSLDALKEFFCKI-----IHTMDTL                   | 1864              |
| SNAKE        | LHSNITRQAYVDRCLLILLHCSLDALKEFLSKI-----IEAMDTL                   | 1861              |
| CANARY       | LLSNAARQAFVDRSLTLLWHCSLDALRVFFGKI-----IVEAMDTL                  | 1853              |
| OSTRICH      | LRSNVTRQAFVDRSLTLLWHCSLDALREFFGTI-----IVQAMDTL                  | 1823              |
| GECKO        | LLSSATRQAYVDRSLTLLHCSLDALDDFFCKI-----IVEAMDSL                   | 1862              |
| TURTLE       | LLSNATRQAFVDRSFLTLLHCSLDALKDFFSKI-----VLEAMDTL                  | 1862              |
| ALLIGATOR    | LLSNVTRQAFVDRSLTLLLYCSLDALKEFFSKI-----VVEAMDTL                  | 1820              |
| PLATYPUS     | HLSSSTRQAFVDRSLTLLHCSLDALKEFFYRI-----IVGAMDML                   | 1855              |
| TASDEVIL     | -LSNIPRLACVDRCLLTLWHC SLAALREFFSSI-----IVEALDVL                 | 1857              |
| <b>HUMAN</b> | <b>PRLSFTRQSFVDRSLTLLWHCSLDALREFFSTI-----VVDAIDVL</b>           | <b>1851</b>       |
| MOUSE        | LPSNVTRQAFVDRSLTLLWHCDLDTLKEFFSRI-----VVDAIDVL                  | 1848              |
| CRASSO2      | LYPGEVRRTTIEKVALPILRLVHKSALLEFFTDH-----MGDLRRTV                 | 1838              |
| POMACEA      | GFQDMIRRTTLERVCLPILRCVHKAALIEFFLDH-----ILDLMRIV                 | 1844              |
| TRICHOPLAX   | SYRPDIRRAAIEERVCLPMLQKASLKITKDFYVSH-----IKEIMDII                | 1834              |
| NEMATOSTELLA | DHTSNVRLAVLDRVSVTLNASKAGVSEFFSSH-----VKEIMEII                   | 1846              |
| PRIAPULA     | NFPGEIRRSCLDNVLLLRQCCHHAVVEFFRCH-----LVEIIGII                   | 1857              |
| SOFTCORAL    | EYRNLTRRAAIDKVCCLVLLRASSTSVFREFFYVDH-----IKNIMEII               | 1853              |
| PISTILLATA   | DYQTHSRRAVIERICITFLKTTSTARRAFYQDQ-----IQKLMSVL                  | 1874              |
| HEMICHOR     | VYPNDIRRAALERVGLPLLRLVDIPTLSTFFISH-----VNQIMNTI                 | 1877              |
| BELCHER      | SFPNEIRRSALERVCLPMLRLVHPAALTEFFTDH-----IREIMDII                 | 1877              |
| STRONG       | RYSKEIRKAAIQRVCIPLLRQASRDATVTFYKGH-----IHDIISVL                 | 1872              |
| STARFISH     | SFSKEIRRAAIERVCIPLMRLAGVKALSSFFKEC-----IKNIGGII                 | 1883              |
|              | : : : :                                                         |                   |

Supplementary Figure 9: Clustal Omega: DNA-PKcs alignment metazoan plus "putative archaeon"

|              |                                                                     | <b>RYG70450.1</b> |
|--------------|---------------------------------------------------------------------|-------------------|
| ARCHAEON     | AGDIFPANMSDETLTLLSHVYVMVTVAYKMLSLLYDHCYVGDVKL---TLTAAFVHGDMSNTV     | 1977              |
| MUDCRAB      | SLTIQ--GRS-DEQQRLLVTKIGSFKILQVIFSRPRLPRERIFNPGSEINAAYQPSD-----      | 1873              |
| SCORPION     | KSKRK--SS----NEIQLVSKIGAFQLIEILYTYLSKEEVS-KESQINC-----              | 1876              |
| SPONGE       | EAKLA--RVTDPKLECLVHKSCCFQFIEILYTRLPSSLISSMESTVNTAYCNGS-----         | 1910              |
| CAPITELLA    | EAKPT--KAPEHAFAEAQLTSKIGCFELLEVMYSRLPNTDVNSKDSSINKSFCSFK-----I      | 1901              |
| DANIO        | QTRFT--KSVESVFESQIMMKIGCCKLEVLYSRLPKEEVYSKNSAINQAFCGTG----C         | 1916              |
| MILII        | QSRFT--KTSESSFDNQLTRKIGCYKLELVYIIRLPKDDIYSEDSKINRAFHSSS----N        | 1912              |
| BAMBOO       | QSRFT--KTNESSFDNQLTKKIGCYKLFVEMYTRLPKNDVYTDGSKIQAFAHSAG----N        | 1911              |
| XENOPUS      | KSRFT--KVPEAAFDSQITKKWGYKMLEVQYSRLSKDEIYST---VNNAYHVSS----K         | 1924              |
| STERLET      | QARFT--KSSESTFETQLTKKNGCYKLEVLYSRLPKEDVYSKESLINQAFCRPN----K         | 1928              |
| GAR          | QARFT--KLNEAMFEGQLIKKNGCYKLEVLYSRLPKEEVYSKESKINQGF CGPS----R        | 1916              |
| LATIMERIA    | QARFT--KSNESAFDTQVTKKTG CYKLEVMCSRLPKDDIYSEQSRINQAFHGSC----S        | 1916              |
| CAECIL       | KGRFT--KSNELAFDAQIMMKMSYYKMLEVMYSRLTKEDIYSKGSRINQAFHGSS----N        | 1918              |
| SNAKE        | KSRFT--KSNETSFETQLIKKISYYKILEVMYSRLSKEDVHSKDSRINQVFORST----H        | 1915              |
| CANARY       | NSRFT--KSHEFTFDTQVTCKMGYYKLEVMYSRLSKEDVYSKDSKINQAYRGSMS----S        | 1907              |
| ONSTRICH     | NSRFT--KSNESTFDTQVTCKTGYYKMLEVMYVRLSKEDVYSKDSKINQAYCGSI----S        | 1877              |
| GECKO        | TSRFT--KSNETMFDTQVTCKMSYYKILEVMYSRLSKEDVYSKDSRINQAF LRST----C       | 1916              |
| TURTLE       | KTRFT--KSNESAFDTQVTCKMGYYKILEVMYSRLSKEDIYSKDSRINQAYQGST----N        | 1916              |
| ALLIGATOR    | KSRFT--KSNETVFNTQVIKCKMGYYKILEVLYSRVSKEDVHSKDSQINQAYQGT----N        | 1874              |
| PLATYPUS     | KSRFT--KSNESTFDTQVTCKLGYKMLEMMYSRLPKDDVHSKESRINRAFHGSS----V         | 1909              |
| TASDEVIL     | KSRFT--KLSESTFDTQVTCKLGYKMLEVLYSRLPKDDVHSKESRINQV FHGSS----I        | 1911              |
| <b>HUMAN</b> | <b>KSRFT--KLNESTFDTQITCKMGYYKILDVMSRLPKDDVHAKESKINQV FHGSC----I</b> | <b>1905</b>       |
| MOUSE        | KSRFT--KLNEFTFDTQITCKMCYYKMLAVMYSRLPKDDVHSKEAKINQAFHGSR----V        | 1902              |
| CRASSO2      | EAKLV--KGS--GLENQLTSKLC CFQLLELMYGRLSKEEVFGKSSVINKKFCEVKSVM--N      | 1892              |
| POMACEA      | EQNLA--KGPESILKTQLTSKVCCFQLLEVMYSRLSREEVNSLSSEINKKVCFGK-----        | 1897              |
| TRICHOPLAX   | ETKLV--KTA--DLENQLISKLGSYKLMKLMYSKLSKQDVNTAESSIVKAYTGRP-----        | 1885              |
| NEMATOSTELLA | EAKQL--KTYDPGFESQLVSKMCAFMI EVLYSRLGKAE LNSPQSSINLAYCPN-----        | 1898              |
| PRIAPULA     | EAKVV--KLPERQYESQLISKICSLKLELMYACL PKEDVY GKDAALGQVFLASR-----       | 1910              |
| SOFTCORAL    | ETRFS--KATDSVFESQLVSKLC CFKLLALLYARLEKTDVSSMESRINRAYNN-D-----       | 1905              |
| PISTILLATA   | EAKEL--KPTDPNFESQVTSKLC CFKLV EILYSQFSKSELNTPQSKVNKIYCRDS-----      | 1927              |
| HEMICHOR     | EAKQI--KVPESFETQLVSKIGCFELMEVLYSRMTKEELNTPQSKVNKIYCRDS-----         | 1930              |
| BELCHER      | GAPQT--KAGEASLRTQLTNKLC CFQLLETMY SRLPKEEVNTPPSRIVRAYKGEE-----      | 1930              |
| STRONG       | EARLT--KNPVP AFENQLVSKICYFELIEVLYSRLSKDD LNSKDSALNREYRHGN-----      | 1925              |
| STARFISH     | DAKTI--KAPETVFQNLVSKTCCFQLVELMYSRLVKEDLFSMDSA INKAYTN-D-----        | 1935              |

: . . . : :

Supplementary Figure 9: Clustal Omega: DNA-PKcs alignment metazoan plus “putative archaeon”

|              |                                                               | <b>RYG70450.1</b> |
|--------------|---------------------------------------------------------------|-------------------|
| ARCHAEON     | NIKGSEL--TSAVLKVAHKFVVRTQMSSIPNYYAYSIVSELKETLFFELYAAAFSCLVTVI | 2036              |
| MUDCRAB      | -TSGKEL-TKDVLRRQSSKVAKGLRHDQ-----TQAEFRRLCACAAYNTLI           | 1922              |
| SCORPION     | -SYGKEL-TREATGFAIARKEKLENGES-----ISKFCRKYCCAAYNAVIAI          | 1925              |
| SPONGE       | PQTGKEL-TQAITKCCHGAKSEDLHGDR-----THYETRRQYHCHAYNTLM           | 1960              |
| CAPITELLA    | PDTGKEM-NLTITKVSNAKGENNMGET-----LLIPLRRALHCAAYNTLIA           | 1951              |
| DANIO        | -AEGNEL-SKNLLKSCFEAFTENMTGEM-----VLELRRQFHCAAYNCAIAL          | 1965              |
| MILII        | -MEGNKLLSKSLLKLCYDAFTENMTGEK-----QLLEKRRQYHCAAYNCIM           | 1962              |
| BAMBOO       | -IEGNKL-SKTLKSCYDFTVENMTGET-----QLLEKRRQYHCAAYNCMIA           | 1960              |
| XENOPUS      | -PEGNEL-TKALIKLCYDFTVENMCGET-----QLLEKRRQYHCAAYNCAIS          | 1973              |
| STERLET      | -AEGNEL-SKSKLLKSCFDFTVENMAGET-----QLLEKRRKYHCAAYNCAIT         | 1977              |
| GAR          | AAEGNEL-SKTLKSCFEAYTENMAGET-----QLEERRQYHCAAYNCAIAV           | 1966              |
| LATIMERIA    | -AQRNGL-SKTLKLCYDEFTEENMAGET-----QLLEKRRQYHCAAYNCAIAV         | 1965              |
| CAECIL       | -AEGNEL-TKILVKSCYDSFSEN                                       | 1967              |
| SNAKE        | -VEGNEL-TKLLIKSCYDAFTENMSGET-----QLEENRRQFHCAAYNCAIAV         | 1964              |
| CANARY       | -VEGNEL-TKTLIKSCYDAFTENMAGES-----QLLEKRRQYHCAAYNCAIAV         | 1956              |
| OSTRICH      | -VEGNEL-TKTLIKSCYDAFTENMAGES-----QLLEKRRQYHCAAYNCAIAV         | 1926              |
| GECKO        | -VEGNEL-TKTLIKSCYDAFTENMTGET-----QLLEKRRQYHCAAYNCAIAV         | 1965              |
| TURTLE       | -VEGNEL-TKTLIKSCYDAFTENMAGES-----QLLEKRRQYHCAAYNCAIAV         | 1965              |
| ALLIGATOR    | -VEGNEL-TKMLIKSCYDAFTENMAGES-----HLLGKRREYHCAAYNCAIAV         | 1923              |
| PLATYPUS     | -IEGNEL-TKTLIKSCYDAFTENMAGET-----QLLEKRRQYHCAAYNCAIAV         | 1958              |
| TASDEVIL     | -VEGNEL-TKTLIKLCYDAFTENMAGET-----QLLEKRRLYHCAAYNCAIA          | 1960              |
| <b>HUMAN</b> | <b>-TEGNEL-TKTLIKLCYDAFTENMAGEN-----QLEERRLYHCAAYNCAISVIC</b> | <b>1954</b>       |
| MOUSE        | -AEGNEL-TKTLKLCYDAFTENMAGES-----QLLEKRRLYHCAAYNCAISL          | 1951              |
| CRASSO2      | VDTGKEM-TQVIMRTAHEAKGEDV                                      | 1942              |
| POMACEA      | PETGKEM-TQKIIKAANNAKSEDT                                      | 1947              |
| TRICHOPLAX   | TEDGKEI-TKSITKAAHACKSDDL                                      | 1935              |
| NEMATOSTELLA | DNTGKEL-TKAITKSAHAAKSEDM                                      | 1948              |
| PRIAPULA     | PAGSKEL-TPVITRLCYDACREDM                                      | 1960              |
| SOFTCORAL    | VKTGKEL-TMAITKAAHAAKSEN                                       | 1955              |
| PISTILLATA   | VKTGKEL-TLAITKAARAASIED                                       | 1977              |
| HEMICHOR     | VKSGKEM-TMALT KIAHAAKGED                                      | 1980              |
| BELCHER      | VKAGNEM-TTAITKFGHAAKSEDL                                      | 1980              |
| STRONG       | VEKGNEM-STALT KAALGARNED                                      | 1975              |
| STARFISH     | VKTGKEM-TQALT KAACHAAKSED                                     | 1985              |
|              | . : . : : . : : . : :                                         |                   |

Supplementary Figure 9: Clustal Omega: DNA-PKcs alignment metazoan plus "putative archaeon"

|              |                                                                    | <b>RYG70450.1</b> |
|--------------|--------------------------------------------------------------------|-------------------|
| ARCHAEON     | TQSEEEKFYDNFIFSQKPSEDIY--DHILHYP---PLDVENDASLSTFTRKFDDARLSNN       | 2091              |
| MUDCRAB      | VKDDLKFYTSLLFNANPTKGEAIWECLIDCNRNLQFDIEINLNPQ--SKRRFVAVR----       | 1976              |
| SCORPION     | TQTDSKFYSTFLFQENFAKGEYIWENIIDLNKEYTFPIELDT-IE--RRRKFISVR----       | 1978              |
| SPONGE       | TQSKPQFFVGFLEKEDVVKGQLLWNNIIDCEKKYEFQVDFEAPLK--RRKQITSIR----       | 2014              |
| CAPITELLA    | TQKEKKFYTAFLFTENPAKNQLHWNINVDQDVVYEFPLEMENPIE--RRKKFVSIR----       | 2005              |
| DANIO        | SFNETKFYQGFLFTEKPKDNQFIFDNLIDSQRVYNFPIEIDVPIE--RKKKYVMIR----       | 2019              |
| MILII        | IFTEAKFYQGFLFSEKAEKNIFIFENLIEAHRTYNFPVEIEVPLE--KRRRFISIR----       | 2016              |
| BAMBOO       | IFTEAKFYQGFLFSEKPEKNIFILENLIDSQRAYNFPVEIEVVE--KRRRYFAIR----        | 2014              |
| XENOPUS      | VFSELKFYQGFLFTEKKEKNLLIFENLIDLQRNYTFPIEVEVPME--RKKKYFAIR----       | 2027              |
| STERLET      | SFNETKFYQGFLFSEKPEKNQFIFENLIDAKHTYSFPVEIEVPLE--RKKKYVAIR----       | 2031              |
| GAR          | SFNETKFYQGFLFTEKPEKNQFIFENIIDAQOTYRFPVEIEVALE--RKAKYVAIR----       | 2020              |
| LATIMERIA    | IFTESKFYQGFLFSEKPEKSLYILENLIDMKCSYNFPIEIEVPIE--KRRKYVAIR----       | 2019              |
| CAECIL       | AFTDAKFYQGFLFTEKTEKNLLIFENLIDLQRQCYTFPVEVEVPLE--RKKKYVAIR----      | 2021              |
| SNAKE        | VFENENKHYHGFLFTEKPKDNLLIFENLLDLQHRYSFPPIEIEVPLE--KPKRYITIR----     | 2018              |
| CANARY       | VFTESKFYQGFLFSEKPEKNLLIFENLIDLKREYTFPVEIEVPLE--RKKRYIAIR----       | 2010              |
| OSTRICH      | VFTESKFYQGFLFTEKTEKNLLIFENLIDLKRQYSFPVEVEVPLE--RKKRYIAIR----       | 1980              |
| GECKO        | VFNESKFYQGFLFTEKPKDNLLIFENLLDLQHRYSFPPIEVEVPLE--RKKRYIAIR----      | 2019              |
| TURTLE       | VFTESKFYQGFLFTEKPEKNLIFENLLDLKHRYSFPVEVEVPM--RKKRYITIR----         | 2019              |
| ALLIGATOR    | VFTESKFYQGFLFTEKPEKNLLIFENLIDLKHQYSFPVEIEVPM--RKKRYIAIR----        | 1977              |
| PLATYPUS     | VFNETKFYQGFLFTEKPEKNLIFENLIDLKRCYTFPVEIEVPM--RKKKYIAIR----         | 2012              |
| TASDEVIL     | VFSEMIFYQGFLFTEKPEKNLIFENLIDLKHQYTFPVEVEVPM--RKKRYIAIR----         | 2014              |
| <b>HUMAN</b> | <b>VFNELKHYQGFLFSEKPEKNLLIFENLIDLKRRYNFPVEVEVPM--RKKKYIEIR----</b> | <b>2008</b>       |
| MOUSE        | VFNELKHYQGFLFNEKPEKNLIFENLIDLKRCYTFPIEVEVPM--RKKKYIEIR----         | 2005              |
| CRASSO2      | TQTDAKFYTAFLFKEDEAKGQFVFDNLLDKDKAYVFSSELKAPLS--RKKQYVSIR----       | 1996              |
| POMACEA      | VQNEHKFYKGFLLQDNTSKGQFLLENIVDRDQKYEFPLELESQFE--RKKKFVAIR----       | 2001              |
| TRICHOPLAX   | TQTEMKHYTVFLFTENVARKQFLWENLIDMEREYAFIEISYQDK--QKTTFRSLR----        | 1989              |
| NEMATOSTELLA | TQTELKHYTAFLFNENPVKGFLLDNLIDTDRKYEFEVELSSTPLE--RKKQMTSIR----       | 2002              |
| PRIAPULA     | TKTEPVYSSLLLQENPAKGQLLWNNIIDCHRRYGFDRSAPLQ--RKRQFVAIR----          | 2014              |
| SOFTCORAL    | TQTLLKHYNGFLFSEDLKSGQFLLDNLDVDCSTKHLFEMELSAPLD--KRTLLTSIR----      | 2009              |
| PISTILLATA   | TQTDLKHYVAFLFSENPIKQQLLDNLDVDCNRTYTFEVELSAPLE--RRKQFRMQA----       | 2031              |
| HEMICHOR     | TQNDIKHYNGFLFAENHAKGQFFLDNLDVDADKVYHFEIEMESPME--RKKKFVAIR----      | 2034              |
| BELCHER      | TQTDKHYTAFLFQENTAKGQFLLDNLDVDPKKEYGFAIEMDAPVE--RKKRFVAIR----       | 2034              |
| STRONG       | VQDNIKHYNAFLFSENHAKGQFLLDNLDVDPKKEYGFAIEMDAPVE--RKKRFVAIR----      | 2029              |
| STARFISH     | TQTDIKHYNAFLFSENTAKGQFLLDNIIIDITKNYSFEIEMNAPME--RKKRFVSIR----      | 2039              |
|              | : : : . . : : : : : .                                              |                   |

Supplementary Figure 9: Clustal Omega: DNA-PKcs alignment metazoan plus "putative archaeon"

|              |                                                               | <b>RYG70450.1</b> |
|--------------|---------------------------------------------------------------|-------------------|
| ARCHAEON     | IYSQSDWAMRNREVNNAVVTVQRLCTQAKKRLGKGGYASQYLQSCMLSSSQAVQSVAAPLQ | 2151              |
| MUDCRAB      | -----KNLKEANQS-SGKG-----AAGTVQYLASHYLDDSSL-----               | 2007              |
| SCORPION     | -----HENRELNSN-KTLN-----FASSLKYAPSQYLSLSSL-----               | 2009              |
| SPONGE       | -----DDLKQSTAA-GNSS--GSPSSSPSTRPRYISSQYLSLSSL-----            | 2051              |
| CAPITELLA    | -----TSVRDVDPD-DEPT-----GPASSVHYLASQYLAGSSL-----              | 2037              |
| DANIO        | -----KEVSG---E-NGDA-----PVYLSSQSYMADSSL-----                  | 2044              |
| MILII        | -----KEAREAGDG-DSGE-----PQYLSSQSYMADSSL-----                  | 2044              |
| BAMBOO       | -----KEARESAEG-DSDE-----PHYLSSQSYMVDSSL-----                  | 2042              |
| XENOPUS      | -----KEARDASST-ESDE-----PSYLSSQSYMADSSL-----                  | 2055              |
| STERLET      | -----KEARQGEG-DSDE-----PHYLSSQSYMADSSL-----                   | 2059              |
| GAR          | -----KEAREAGDR-DAEE-----PHYLSSQSYMADSSL-----                  | 2048              |
| LATIMERIA    | -----KEARGSTIG-DLDE-----PQYMSSQSYMADSSL-----                  | 2047              |
| CAECIL       | -----QEARNTANG-ESDA-----PHYLSSQSYMADSSL-----                  | 2049              |
| SNAKE        | -----KEARQTMSG-DSAE-----PRYLASASYMVDSSL-----                  | 2046              |
| CANARY       | -----KEARDAGNS-SQDE-----PKYLASSSYMMDSSL-----                  | 2038              |
| OSTRICH      | -----KEARDSGNG-NEDE-----PKYLPSASYMMDSSL-----                  | 2008              |
| GECKO        | -----KDAREAMSV-DSAE-----PHYLASASYMADSSL-----                  | 2047              |
| TURTLE       | -----KEARDAVNR-DSDE-----PQYLPSASYMVDSSL-----                  | 2047              |
| ALLIGATOR    | -----KEARDTVNG-GPDE-----PQYLPSASYMVDSSL-----                  | 2005              |
| PLATYPUS     | -----KEARDSVND-NSDE-----PHYLSSLSSMADSSL-----                  | 2040              |
| TASDEVIL     | -----KEARDAANG-DSEG-----PHYLSSLSYMADSSL-----                  | 2042              |
| <b>HUMAN</b> | <b>-----KEAREAAANG-DSDG-----PSYMSSLSYLADSTL-----</b>          | <b>2036</b>       |
| MOUSE        | -----KEARDAANG-ASGS-----PHYMSSLSYLTDSL-----                   | 2033              |
| CRASSO2      | -----NEVKESNSQ-NGEA-----DEGESSLHLASQYLADSSL-----              | 2029              |
| POMACEA      | -----SEMQEKQS---D-----KDGAISSYHLASQYLTESSL-----               | 2030              |
| TRICHOPLAX   | -----EQSRSSVSS-ESADE--ADSGIAMAPSYHLSSQYLADSSL-----            | 2026              |
| NEMATOSTELLA | -----INARVQS---DQVEE--AL--SQGRSVRYLSSQYLADSSL-----            | 2035              |
| PRIAPULA     | -----TAVREIDRD-ADGQ-----GAPLPSVHYLASQYLADSSL-----             | 2047              |
| SOFTCORAL    | -----CEARATRMN-SSEN-----YEHGVSLRYLSSQYLADSSL-----             | 2042              |
| PISTILLATA   | -----R---IPSPK-ENSL--EESAGRTGLSIHYMYSQYLADSSL-----            | 2065              |
| HEMICHOR     | -----KEVRDASEE-DDLQDSAVGL-YGTGGVRYLSSQYLADSSL-----            | 2072              |
| BELCHER      | -----QELRGQDSP-EAG-----SSRY-MQSYLAGSSL-----                   | 2060              |
| STRONG       | -----TQARETNTP-EES-----GYVSGPAHYLSSQYLSLSSL-----              | 2061              |
| STARFISH     | -----NQIQDQTVAG-SSSQQSDSGIEMSGYTGRYLSTQYLANSSL-----           | 2078              |

: \*

Supplementary Figure 9: Clustal Omega: DNA-PKcs alignment metazoan plus "putative archaeon"

|              |                                                                | <b>RYG70450.1</b> |
|--------------|----------------------------------------------------------------|-------------------|
| ARCHAEON     | TSSIKPPSMTRVEGDYTL <b>LSQY</b> DYTNMLGNGGGSSATDYRI-----A       | 2192              |
| MUDCRAB      | -----RED <b>LSQF</b> DFSNSVVLAMSQREDNQYR-----                  | 2033              |
| SCORPION     | -----SDD <b>VSQF</b> DFSSSELAFSQDMKNKNRKEEI-----DS             | 2040              |
| SPONGE       | -----STD <b>VSQY</b> DFTLPHHHQYGSVGGGAST-E-----SSSI-D          | 2083              |
| CAPITELLA    | -----STD <b>VSQF</b> DFGSSMVSSADSSFDNQRSRE-----SSI             | 2068              |
| DANIO        | -----SEEMS <b>QF</b> DFSTGVQSFYSYNSQNPSTSGV-----SSSSRMRE       | 2078              |
| MILII        | -----SEEMS <b>QF</b> DFSTGVQSFYSYNSQDPRGH-----AVRSRRKE         | 2078              |
| BAMBOO       | -----SEEMS <b>QF</b> DFSTGVQSFYSYSSQDPKVS-----VLRTRKTE         | 2076              |
| XENOPUS      | -----IEEMS <b>QF</b> DFSTGVQSFYSYSSQSKMLS-----QSASRKKE         | 2089              |
| STERLET      | -----SEEMS <b>QF</b> DFSTGVQSFYSYSSQDPSAR-----AARGRRRE         | 2093              |
| GAR          | -----SEEMS <b>QF</b> DFSTGVQSFYSYSSQDPSTR-----PMPSTRRD         | 2082              |
| LATIMERIA    | -----SEEMS <b>QF</b> DFSTGVQSFYSYSSQNRAAA-----VVHSRRKE         | 2081              |
| CAECIL       | -----REEMS <b>QF</b> DFSTGVQSFYSYSSQDPTAA-----QFHSRKRE         | 2083              |
| SNAKE        | -----SEEMS <b>QF</b> DFSTGIQSFYSYSSQEDPTSS-----GSHIRKKE        | 2080              |
| CANARY       | -----SEEMS <b>QF</b> DFSTGVQSFYSYSSQDVTAS-----STRFRRKE         | 2072              |
| OSTRICH      | -----SEEMS <b>QF</b> DFSTGVQGFYSYSSQDVTAS-----SPRFRRKE         | 2042              |
| GECKO        | -----SEEMS <b>QF</b> DFSTGVQSFYSYSSQDPTAS-----ASHFRRKE         | 2081              |
| TURTLE       | -----SEEMS <b>QF</b> DFSTGVQSFYSYSSQDPTAS-----SIHFRRKE         | 2081              |
| ALLIGATOR    | -----SEEMS <b>QF</b> DFSTGVQSFYSYNTQDPTAT-----SARFRRKE         | 2039              |
| PLATYPUS     | -----SEE <b>ISQF</b> DFSTGVQSYSYSSQDVKST-----GYHFKRRE          | 2074              |
| TASDEVIL     | -----SEEMS <b>QF</b> DFSTGVQSYSYSTQDSKAT-----VVHFRRRE          | 2076              |
| <b>HUMAN</b> | -----SEEMS <b>QF</b> DFSTGVQSYSYSSQDPRPA-----TGRFRRRE          | <b>2070</b>       |
| MOUSE        | -----SEEMS <b>QF</b> DFSTGVQSYSYSSQDRKPT-----TGHFQRRE          | 2067              |
| CRASSO2      | -----HED <b>LNQY</b> DFATATPQ--MSEKSPREKVLTVRKS-----SYTDEEDD   | 2067              |
| POMACEA      | -----SED <b>LSKY</b> EFTVSGSAQNTSGIPKTKASLRKNS-----SY-----G    | 2065              |
| TRICHOPLAX   | -----NEE <b>ISQF</b> DFNSSTVQGYSENNSIKQIPT-----RE              | 2056              |
| NEMATOSTELLA | -----SEE <b>VSQF</b> DFSTPVQVNIINYLKR-----                     | 2058              |
| PRIAPULA     | -----SED <b>LSRY</b> DFNVSTQIRERGDPAERKPE-GEAEQEEEEAMDVNEE     | 2092              |
| SOFTCORAL    | -----CEE <b>VSQF</b> DFSTPIQALSQSESTEQD-IA-----GGE-----N       | 2073              |
| PISTILLATA   | -----SED <b>ISQ</b> CDFSSPIQVHSGTEA--RQPLY-----KLNE            | 2095              |
| HEMICHOR     | -----SEE <b>ISQF</b> DMNTGCLYWHTNLCMSIFACMLHVLPH-----FVFSL     | 2112              |
| BELCHER      | -----SED <b>ISQF</b> DFSTSGTQVKHSQTFSSSTQERYSQASQG---SSRLQARQQ | 2103              |
| STRONG       | -----SED <b>VNQF</b> DFSSSVRHFSSM-ESQRDGGSQGSQSRPGSMASRQD      | 2106              |
| STARFISH     | -----SED <b>IQQF</b> DFSGGVQQFNASI-DKDQSLSQRSSVPH---IKKYSNE    | 2120              |

:.: :

Supplementary Figure 9: Clustal Omega: DNA-PKcs alignment metazoan plus "putative archaeon"

|              |                                                                                                                                                                                                                                                                                                                | <b>RYG70450.1</b> |
|--------------|----------------------------------------------------------------------------------------------------------------------------------------------------------------------------------------------------------------------------------------------------------------------------------------------------------------|-------------------|
| ARCHAEON     | FPNSAAVVAG-WDDQQVVL <b>EM</b> NHF <b>NS</b> IHIMGTLVRAIQRM <b>Y</b> VLFK-----EKW <span style="color:blue">I</span> ANTATL                                                                                                                                                                                      | 2246              |
| MUDCRAB      | ---IAASND <b>E</b> TGELLRM <b>NF</b> EQSD <b>Y</b> NEHEV <b>M</b> ANLTA <b>AI</b> YH <b>M</b> VDAKIMMLHKEDSTPSAA <b>E</b> I                                                                                                                                                                                    | 2090              |
| SCORPION     | NPSNEAKDDDLVSNIT <b>V</b> EL <b>E</b> IDD <b>L</b> NQHECM <b>NS</b> L <b>T</b> M <b>L</b> VQ <b>H</b> MEKIQLL-----SSS--PKE <b>I</b>                                                                                                                                                                            | 2093              |
| SPONGE       | EDSGNSQEASSYVVSEE <b>Q</b> LE <b>E</b> DDL <b>N</b> IHEC <b>M</b> TP <b>L</b> M <b>K</b> L <b>L</b> D <b>H</b> M <b>I</b> INKITPAPSGD----S <b>P</b> E <b>M</b>                                                                                                                                                 | 2139              |
| CAPITELLA    | EVPDVVLKEHY-----I <b>E</b> M <b>E</b> MDAL <b>N</b> Q <b>H</b> PC <b>M</b> AAL <b>S</b> AL <b>Q</b> H <b>M</b> K <b>L</b> NQIT <b>P</b> EV <b>E</b> K <b>G</b> SK--P <b>S</b> S <b>M</b>                                                                                                                       | 2121              |
| DANIO        | -RKEVLSQDET-----V <b>E</b> LE <b>M</b> DE <b>L</b> NQ <b>H</b> EC <b>M</b> AN <b>M</b> TAL <b>L</b> R <b>H</b> M <b>Q</b> R <b>N</b> NIT <b>P</b> K <b>V</b> E <b>E</b> G <b>V</b> R--P <b>S</b> D <b>L</b>                                                                                                    | 2130              |
| MILII        | QAE <b>L</b> SVVQSDI-----M <b>E</b> LE <b>M</b> DE <b>L</b> NQ <b>H</b> EC <b>M</b> P <b>A</b> M <b>I</b> AL <b>I</b> N <b>H</b> M <b>Q</b> R <b>N</b> NIT <b>P</b> Q <b>V</b> E <b>E</b> G <b>K</b> T--P <b>Q</b> E <b>L</b>                                                                                  | 2131              |
| BAMBOO       | WTES <b>N</b> IM <b>L</b> NDI-----V <b>E</b> LE <b>M</b> DE <b>M</b> NQ <b>H</b> EC <b>M</b> AT <b>M</b> TAL <b>I</b> K <b>H</b> M <b>Q</b> K <b>T</b> NIT <b>P</b> K <b>V</b> E <b>E</b> G <b>K</b> T--P <b>H</b> E <b>L</b>                                                                                  | 2129              |
| XENOPUS      | QIT <b>E</b> G <b>K</b> T <b>F</b> DDV-----M <b>E</b> F <b>E</b> M <b>D</b> E <b>L</b> NQ <b>H</b> EC <b>M</b> A <b>A</b> M <b>T</b> G <b>L</b> I <b>K</b> H <b>M</b> N <b>R</b> S <b>E</b> IT <b>P</b> K <b>V</b> ED <b>E</b> D <b>A</b> S--P <b>Q</b> E <b>L</b>                                             | 2142              |
| STERLET      | -R <b>V</b> ES <b>L</b> VQDDV-----V <b>E</b> LE <b>M</b> DE <b>L</b> NQ <b>H</b> EC <b>M</b> A <b>S</b> M <b>T</b> AL <b>L</b> N <b>H</b> M <b>Q</b> R <b>N</b> NIT <b>P</b> K <b>V</b> DE <b>G</b> T <b>V</b> --P <b>A</b> D <b>L</b>                                                                         | 2145              |
| GAR          | -G <b>A</b> E <b>A</b> ALQDDV-----V <b>V</b> LE <b>M</b> DE <b>L</b> NQ <b>H</b> EC <b>M</b> A <b>S</b> M <b>T</b> V <b>L</b> I <b>N</b> H <b>M</b> Q <b>R</b> N <b>N</b> IT <b>P</b> E <b>V</b> E <b>E</b> G <b>T</b> V--P <b>S</b> D <b>L</b>                                                                | 2134              |
| LATIMERIA    | -R <b>T</b> ES <b>V</b> VQDDV-----M <b>E</b> F <b>E</b> M <b>D</b> E <b>L</b> NQ <b>H</b> EC <b>M</b> A <b>A</b> M <b>T</b> AL <b>I</b> N <b>H</b> M <b>Q</b> R <b>N</b> KIT <b>P</b> Q <b>V</b> E <b>E</b> E <b>S</b> G--P <b>V</b> E <b>L</b>                                                                | 2133              |
| CAECIL       | -H <b>P</b> E <b>F</b> T <b>V</b> QEDV-----M <b>E</b> F <b>E</b> M <b>D</b> E <b>L</b> NQ <b>H</b> EC <b>M</b> A <b>A</b> M <b>T</b> G <b>L</b> I <b>K</b> Y <b>M</b> Q <b>K</b> TQIT <b>P</b> K <b>V</b> E <b>E</b> G <b>T</b> V--P <b>Q</b> D <b>L</b>                                                       | 2135              |
| SNAKE        | -I <b>T</b> D <b>T</b> V <b>V</b> PGDM-----M <b>E</b> LE <b>M</b> DE <b>L</b> NQ <b>H</b> EC <b>M</b> T <b>S</b> M <b>T</b> T <b>L</b> L <b>K</b> H <b>M</b> H <b>R</b> N <b>N</b> IT <b>P</b> V <b>V</b> E <b>K</b> D <b>T</b> N--S <b>P</b> E <b>L</b>                                                       | 2132              |
| CANARY       | -P <b>T</b> E <b>Y</b> K <b>V</b> LNDE-----M <b>E</b> LE <b>M</b> DE <b>F</b> NQ <b>H</b> EC <b>M</b> A <b>S</b> M <b>T</b> S <b>L</b> I <b>K</b> H <b>M</b> E <b>R</b> NQIT <b>P</b> K <b>V</b> E <b>E</b> G <b>T</b> V--P <b>A</b> D <b>L</b>                                                                | 2124              |
| OSTRICH      | -P <b>T</b> E <b>Y</b> MALDDD-----T <b>E</b> LE <b>M</b> DE <b>L</b> NQ <b>H</b> EC <b>M</b> A <b>S</b> M <b>T</b> T <b>L</b> I <b>K</b> H <b>M</b> Q <b>R</b> NQIT <b>P</b> K <b>V</b> ED <b>G</b> T <b>V</b> --P <b>V</b> D <b>L</b>                                                                         | 2094              |
| GECKO        | -P <b>T</b> ES <b>M</b> GLGDI-----M <b>E</b> LE <b>M</b> DE <b>L</b> NQ <b>H</b> EC <b>M</b> A <b>S</b> M <b>T</b> T <b>L</b> I <b>K</b> H <b>M</b> H <b>R</b> N <b>N</b> IT <b>P</b> T <b>V</b> E <b>K</b> G <b>A</b> V--L <b>P</b> D <b>L</b>                                                                | 2133              |
| TURTLE       | -P <b>T</b> ES <b>M</b> DPDDL-----M <b>E</b> LE <b>M</b> DE <b>L</b> NQ <b>H</b> EC <b>M</b> A <b>S</b> M <b>T</b> T <b>L</b> I <b>K</b> H <b>M</b> Q <b>R</b> NQIT <b>P</b> K <b>V</b> DE <b>G</b> I <b>V</b> --P <b>R</b> D <b>L</b>                                                                         | 2133              |
| ALLIGATOR    | -S <b>T</b> ES <b>M</b> VLDD <b>E</b> -----M <b>E</b> LE <b>M</b> DE <b>L</b> NQ <b>H</b> EC <b>M</b> T <b>A</b> M <b>T</b> T <b>L</b> I <b>K</b> H <b>M</b> Q <b>R</b> NQIT <b>P</b> Q <b>V</b> DE <b>G</b> A <b>V</b> --S <b>V</b> A <b>L</b>                                                                | 2091              |
| PLATYPUS     | -Y <b>R</b> DP <b>V</b> TQSDV-----L <b>E</b> LE <b>M</b> DE <b>L</b> NQ <b>H</b> EC <b>M</b> A <b>T</b> M <b>T</b> AL <b>I</b> K <b>H</b> M <b>Q</b> NNQIT <b>P</b> K <b>V</b> E <b>E</b> G <b>S</b> G--S <b>T</b> N <b>L</b>                                                                                  | 2126              |
| TASDEVIL     | -R <b>I</b> DS <b>M</b> VQDDV-----M <b>E</b> LE <b>M</b> DE <b>L</b> NQ <b>H</b> EC <b>M</b> T <b>T</b> M <b>T</b> AL <b>I</b> K <b>H</b> M <b>Q</b> R <b>N</b> HIT <b>P</b> H <b>V</b> K <b>E</b> G <b>S</b> E--P <b>P</b> S <b>L</b>                                                                         | 2128              |
| <b>HUMAN</b> | <b>-QRDP</b> T <b>V</b> HDDV-----L <b>E</b> LE <b>M</b> DE <b>L</b> N <b>R</b> H <b>E</b> C <b>M</b> A <b>P</b> L <b>T</b> AL <b>V</b> K <b>H</b> M <b>H</b> R <b>S</b> L <b>G</b> P <b>P</b> Q <b>G</b> E <b>E</b> D <b>S</b> V--P <b>R</b> D <b>L</b>                                                        | <b>2122</b>       |
| MOUSE        | -H <b>Q</b> DS <b>M</b> TQDDI-----M <b>E</b> LE <b>M</b> DE <b>L</b> NQ <b>H</b> EC <b>M</b> A <b>P</b> M <b>I</b> AL <b>I</b> K <b>H</b> M <b>Q</b> R <b>N</b> V <b>I</b> A <b>P</b> K <b>G</b> E <b>E</b> G <b>S</b> I--P <b>K</b> D <b>L</b>                                                                | 2119              |
| CRASSO2      | T <b>D</b> T <b>K</b> V <b>M</b> VEDDY-----V <b>E</b> LE <b>M</b> DE <b>L</b> NQ <b>H</b> E <b>G</b> M <b>A</b> N <b>M</b> I <b>A</b> L <b>L</b> K <b>H</b> M <b>Q</b> R <b>A</b> K <b>I</b> I <b>P</b> L <b>V</b> E <b>S</b> G-V--V <b>P</b> E <b>L</b>                                                       | 2119              |
| POMACEA      | G <b>D</b> N <b>K</b> V <b>R</b> LDGDY-----V <b>E</b> LE <b>M</b> DAL <b>N</b> S <b>H</b> E <b>C</b> M <b>A</b> P <b>L</b> VAL <b>L</b> K <b>H</b> I <b>H</b> K <b>N</b> N <b>I</b> F <b>P</b> A <b>A</b> Q <b>S</b> D <b>A</b> S--S <b>Q</b> D <b>M</b>                                                       | 2118              |
| TRICHOPLAX   | T <b>G</b> D <b>S</b> E <b>K</b> A <b>K</b> T <b>I</b> INK <b>F</b> ADE <b>E</b> LE <b>L</b> DDL <b>N</b> K <b>H</b> E <b>C</b> M <b>E</b> ALL <b>T</b> L <b>L</b> D <b>H</b> M <b>A</b> V <b>N</b> K <b>I</b> N <b>P</b> A <b>I</b> E <b>K</b> D <b>T</b> T--P <b>S</b> E <b>M</b>                            | 2114              |
| NEMATOSTELLA | T <b>G</b> K <b>P</b> D <b>Q</b> L <b>G</b> -ED <b>S</b> Y <b>E</b> I <b>G</b> ED <b>V</b> E <b>M</b> DE <b>L</b> N <b>S</b> H <b>E</b> C <b>L</b> T <b>K</b> I <b>C</b> S <b>L</b> T <b>H</b> M <b>K</b> E <b>S</b> N <b>I</b> S <b>P</b> Q <b>P</b> D <b>K</b> G <b>A</b> L--P <b>K</b> D <b>M</b>           | 2115              |
| PRIAPULA     | E <b>S</b> G <b>S</b> AT <b>L</b> AGDY-----V <b>E</b> M <b>E</b> M <b>D</b> E <b>L</b> NQ <b>H</b> EC <b>M</b> A <b>S</b> M <b>V</b> AL <b>I</b> N <b>H</b> L <b>A</b> T <b>T</b> V <b>C</b> --P <b>I</b> Q <b>A</b> A <b>S</b> S--P <b>A</b> H <b>M</b>                                                       | 2143              |
| SOFTCORAL    | S <b>G</b> T <b>P</b> A <b>S</b> P <b>K</b> E <b>S</b> DS <b>D</b> IS <b>S</b> E <b>E</b> LE <b>M</b> DE <b>L</b> N <b>R</b> H <b>D</b> C <b>M</b> T <b>T</b> L <b>V</b> G <b>L</b> I <b>N</b> H <b>L</b> V <b>K</b> N <b>K</b> I <b>S</b> P <b>Q</b> E <b>Q</b> G <b>K</b> E--A <b>N</b> E <b>M</b>           | 2131              |
| PISTILLATA   | S <b>S</b> S <b>T</b> A <b>E</b> Q <b>T</b> D <b>D</b> W <b>Y</b> E <b>V</b> SE <b>D</b> T <b>L</b> E <b>M</b> DDL <b>N</b> R <b>H</b> E <b>S</b> M <b>A</b> K <b>M</b> I <b>S</b> L <b>L</b> K <b>H</b> L <b>V</b> D <b>K</b> K <b>I</b> S <b>P</b> E <b>Q</b> V <b>K</b> D <b>V</b> P--P <b>T</b> D <b>M</b> | 2153              |
| HEMICHOR     | L <b>P</b> P <b>S</b> A <b>F</b> V <b>K</b> GDY-----L <b>E</b> M <b>E</b> M <b>D</b> E <b>L</b> N <b>L</b> H <b>E</b> C <b>M</b> S <b>N</b> M <b>T</b> AL <b>L</b> K <b>H</b> M <b>K</b> R <b>N</b> K <b>V</b> T <b>P</b> E <b>V</b> A <b>K</b> G <b>T</b> V--P <b>H</b> E <b>L</b>                            | 2165              |
| BELCHER      | Q <b>D</b> S <b>S</b> V <b>N</b> I <b>H</b> G <b>D</b> F-----L <b>E</b> I <b>E</b> M <b>D</b> E <b>L</b> NQ <b>H</b> EC <b>M</b> S <b>S</b> M <b>S</b> A <b>V</b> L <b>Q</b> H <b>M</b> A <b>R</b> N <b>N</b> IT <b>P</b> Q <b>V</b> Q <b>K</b> G <b>A</b> A--P <b>K</b> D <b>M</b>                            | 2156              |
| STRONG       | S <b>K</b> P <b>V</b> F <b>S</b> P <b>G</b> G <b>E</b> Y-----L <b>E</b> M <b>E</b> DAL <b>N</b> Q <b>H</b> EC <b>M</b> A <b>A</b> M <b>T</b> G <b>V</b> L <b>K</b> H <b>M</b> T <b>N</b> N <b>K</b> I <b>N</b> P <b>D</b> I <b>T</b> K <b>A</b> T <b>K</b> --A <b>E</b> E <b>M</b>                             | 2159              |
| STARFISH     | E <b>T</b> P <b>T</b> V <b>V</b> VQ <b>G</b> E <b>Y</b> -----I <b>E</b> M <b>E</b> S <b>D</b> AL <b>N</b> Q <b>H</b> EC <b>M</b> A <b>S</b> L <b>T</b> A <b>V</b> L <b>K</b> H <b>M</b> Q <b>A</b> N <b>K</b> IT <b>P</b> E <b>I</b> P <b>E</b> G <b>S</b> K--A <b>S</b> E <b>M</b>                            | 2173              |
|              | . * . * : : : :                                                                                                                                                                                                                                                                                                | :                 |

Supplementary Figure 9: Clustal Omega: DNA-PKcs alignment metazoan plus "putative archaeon"

|              |                                                                     | <b>RYG70450.1</b> |
|--------------|---------------------------------------------------------------------|-------------------|
| ARCHAEON     | PNWLKECYELV-LSS--KHKKAKMFILRLFINQPVATI IKPWLHMLPGVLENIYS----        | 2299              |
| MUDCRAB      | PPWMTIIQOKLESGE--THRNVKLFLRLMMNTS--RVFAPYAVHF INPVLTCCLVD----       | 2142              |
| SCORPION     | PKWLDNLCKKLEDYS--VHRNIKLFITKLFINNA--EIFKPYAVFLLQPLINLILN----        | 2145              |
| SPONGE       | PPWMTPLHKRMTDSR--TGRNIKLFIVRLITNRP--KIFQPYAKHWLPVLTQFILSGDST        | 2195              |
| CAPITELLA    | PDWMKNIHDKIKNSD--TQLNIRLFLAKVILNGE--SVFRPYASFWFQPLVALATN----        | 2173              |
| DANIO        | PPWMKFLQGKLDNPS--TPLNIRLFLAKLIINTE--EIFRQPYAKHWLGPLMQLVVS----       | 2182              |
| MILII        | PPWMKFLHGKLGNS--IPLNIRLFLAKLIVNSE--EVFRPYAKEWLGPLLQLVVS----         | 2183              |
| BAMBOO       | PPWMKFLHGKLGNSA--TPLNIRLFAKLIIVNTE--EIFQPYAKEWLGPLLQLVVS----        | 2181              |
| XENOPUS      | PSWMKFLHVKLGNTS--TPLNIRLFLAKLIVNTE--EVFRPYARFWIGPILQLIVS----        | 2194              |
| STERLET      | PPWMKFVHGKFGNAS--THLNIKLFLAKLIINTE--EVFRPYARHWLGPLLQLVVS----        | 2197              |
| GAR          | PPWMKFLOGKLGNS--TQLNIRLFLAKLIVNKE--EVFRPYAKHWLWPLLQLVVS----         | 2186              |
| LATIMERIA    | PPWMKFLSHKLANPA--TPLNIRLFLAKLIVNTE--EVFRPYAKHWLGPFLLQLVVS----       | 2185              |
| CAECIL       | PPWMKFLHGKLGNTS--TPLNIRLFLAKLIANTE--DVFRPYAKQWLGPLLQLVVS----        | 2187              |
| SNAKE        | PPWMKFLHNKLGNT--VPLNIRLFAKLIIVNTE--EVFQPYAKWWLGPLLQLVVS----         | 2184              |
| CANARY       | PLWMKFLHGKLGNS--VPLNIRLFLAKLIVNTE--DVFRPYAKHWLGPLLQLVVS----         | 2176              |
| OSTRICH      | PLWMKFLHGKLGNS--VPLNIRLFLAKLIANTE--DVFRPYAKQWLGPLLQLVVS----         | 2146              |
| GECKO        | PPWMKFLHSKLGNS--VPLNIRLFAKLIIVNTE--EVFQPYAKQFLGPLLQLIVS----         | 2185              |
| TURTLE       | PPWMKFHKGKLGNS--MPLNIRLFLAKLIVNTE--EVFRPYARQWLGPLLQLVVS----         | 2185              |
| ALLIGATOR    | PPWMKFLHSKLGNS--VPLNIRLFLAKLIVNTE--EVFRPYARHWLGPLLQLVVS----         | 2143              |
| PLATYPUS     | PPWMKFLHGKLANPL--GALNIRLFLAKLIANTE--EVFRPYARHWLGPLLQLVVS----        | 2178              |
| TASDEVIL     | PPWMKFLHNKLENPS--TPLNIRLFLAKLIINTE--EVFRPYAKHWLNPLLQLVVS----        | 2180              |
| <b>HUMAN</b> | <b>PSWMKFLHGKLGNPI--VPLNIRLFLAKLIVNTE--EVFRPYAKHWLSPLLQLAAS----</b> | <b>2174</b>       |
| MOUSE        | PPWMKFLHDKLGNS--VSLNICLFLAKLIVNTE--EVFRPYAKHWLSPLLQLAVC----         | 2171              |
| CRASSO2      | PAWMKNLNDKLRSPR--THNNIKYFITKLIINTA--EIFRQPYARDWIRPLTQLIIS----       | 2171              |
| POMACEA      | PQWMVFLHDKMTKNTGSDTLNIRLFLAKLIINTS--EIFQPFARLWLRPLCQLILS----        | 2172              |
| TRICHOPLAX   | PSWMVALRKKASDHT--TNRNIKLFIAKLIINRP--KIFRQPYAKFWLVPLLIQLIV----       | 2165              |
| NEMATOSTELLA | PSWMSALHKKLTNFE--THLNIQFLIAKVIINQS--QVFEPYARFWLSPLMELILKLEE         | 2171              |
| PRIAPULA     | PAWMELLHGKFSHVE--TPLNVRFIARLVVLC--HAFRQPCAAASWLAFLMHLVVN----        | 2195              |
| SOFTCORAL    | PPWMSYLHKKLSHHS--SELNVRLFAKLIITNLP--EVFEPYAKFWLDSLMEILILL----       | 2183              |
| PISTILLATA   | PAWMAPLHKKIASSS--THLNIRLFLAKLIINEA--KIFEAHAKFWFNPLMELILQIKDT        | 2209              |
| HEMICHOR     | PGYMSYLQKKSGPS--TNPNVKLFIIKLIINAE--EVFRQPYAKFWLAPLMEWILG----        | 2217              |
| BELCHER      | PPWMSCLNKKLGGSS--THKNVKLFLAKLIVNNE--EVFRPYARFWLSPLMEMIVR----        | 2208              |
| STRONG       | PQWMSGKQKLSQS--TEHNKLFIVRLVINAQ--DVFPYARFWLSPLMQFLAG----            | 2211              |
| STARFISH     | PGWMASLQKLSQS--THVNIKLFIARLIINNN--EVFTPYARFWLSGLLQLLIS----          | 2225              |
|              | * :: : * : : . : : .                                                |                   |

Supplementary Figure 9: Clustal Omega: DNA-PKcs alignment metazoan plus "putative archaeon"

|              |                                                                     | <b>RYG70450.1</b> |
|--------------|---------------------------------------------------------------------|-------------------|
| ARCHAEON     | IYC-----HNKKGYHYLLRDMFTFWDTWADV TIPVASLK---HAGMILNFLLLTHLDHDD       | 2351              |
| MUDCRAB      | GTT-----GDRINIFYFSDLIVMVM-GWGKRAGSQDSTMGRNMVSRVLRFLCSNTPHNR         | 2194              |
| SCORPION     | ATF-----GREINIFYILDMVLL-SWSSIAIPEDSSIGRHAASGLLEFLMSKCFHIR           | 2197              |
| SPONGE       | AGMGGAVGGGENGLDYFTVDAIATML-SWSSTAIIED----RFLGSQLEYYIMLRSNHKN        | 2250              |
| CAPITELLA    | -----MGGLNYFSLDIIVTLL-SWHEIAIPEETTVDIAMTSHLVKYIVQNCYHQN             | 2222              |
| DANIO        | SSN-----G-GEGIHYFMVVDIVVTVL-SWASVSPKGNTRDEVLVNRLGFLFKNCFHSK         | 2235              |
| MILII        | GNN-----G-GDGIHYMVVEIVVTVL-SWTSVATPKGNMKDEILANRLEFLMKNSFHEK         | 2236              |
| BAMBOO       | GNN-----G-GDGIHYMVVEIVVTVL-SWISVATPKGDLKNEILANRLEFLMKNCFHEK         | 2234              |
| XENOPUS      | GNN-----G-GTGIHYMVVEITLVTL-SWSSIATPNGQAKEEILANRLEFLMKNVFHEK         | 2247              |
| STERLET      | GNN-----G-GEGIHYMVVEIVVTVL-SWTSLASPKGNTRDEILANRLEFLMKNAFYDK         | 2250              |
| GAR          | GNN-----G-GEGIHYFMVVEIVVTVL-SWASVATPKGDTKDEVLANRLEFLMRNAFHEK        | 2239              |
| LATIMERIA    | GNN-----G-GEGIHYMVVDIVVTVL-SWANIAPKGNTRDEILANRLEFLMKNTYHEK          | 2238              |
| CAECIL       | GNN-----G-GDGIHYMVVEIVVTVL-SWANVATPAGLAKDEILANRLEFLVTHSFHEK         | 2240              |
| SNAKE        | GDN-----G-GEGIHYMVVEIVVTLL-SWTNVATPKGNIKDEVLANRLEFLMKNVFHQK         | 2237              |
| CANARY       | GNN-----G-GEGIHYMVVEIVVTIL-SWTSVATPKGNIKDEILANRLEFLMKNAFHPK         | 2229              |
| ONSTRICH     | GNN-----G-GEGIHYMVVEIVVTLL-SWTSVATPKGNIKDEILANRLEFLMKNAFHPK         | 2199              |
| GECKO        | GDN-----G-GEGIHYMVVEIVVTLL-SWTSIATPKENIKDEILANRLEFLMKNAFHPK         | 2238              |
| TURTLE       | RDN-----G-GEGIHYMVVEIVVTLL-SWTSVAAPKGNIKDEILANRLEFLMKNVFHQK         | 2238              |
| ALLIGATOR    | RDN-----G-GEGIHYMVVEIVVTLL-SWTSVSPKGNVKDEILANRLEFLMKNTFHQK          | 2196              |
| PLATYPUS     | GEN-----G-GEGIHYMVVEIVATVL-SWTSIATPTGVTKDELLANRLEFLMKHVFHPK         | 2231              |
| TASDEVIL     | ENN-----G-GEGIHYMVVEIVVVVL-SWTSIATPKGVPKDELLANRLLQFLMKHVFHPK        | 2233              |
| <b>HUMAN</b> | <b>ENN-----G-GEGIHYMVVEIVATIL-SWTGLATPTGVPKDEVLANRLLNFLMKHVFHPK</b> | <b>2227</b>       |
| MOUSE        | EN-----N-REGIHYMMVEIVATIL-SWTGLATPTGVPKDEVLANRLLRFLMKHVFHPK         | 2223              |
| CRASSO2      | GLF-----TGLNYFVIDIVVTIM-SWHQVAIPQDTEVEDRAMSSRLVEFVMGYVYNDT          | 2222              |
| POMACEA      | TSL-----C-DNGINIFYIMDLLVTML-SWHSTAVPQNSSTERAMASRLVEFLVRNVHET        | 2225              |
| TRICHOPLAX   | EGK-----E-SDGIHYFIVDLMIILL-SWADVAI PKDVD-EILQANRLMEFLMRNAFYPN       | 2217              |
| NEMATOSTELLA | EGE-----N-KRGLNYFVVDLLVTIL-SWATTAIPEDSYGDRHLASRLLQTVMRRTHHEN        | 2224              |
| PRIAPULA     | GNC-----GVAAAIHSLTADV VVVML-SWTPVARPQDNMTERSLASRLEFLMRNARHAT        | 2249              |
| SOFTCORAL    | PTF-----K-NSELNYFVIDIVVTML-SWSSVTIPEDSYSSRRLTSRLLLEYLMETCNHPT       | 2236              |
| PISTILLATA   | EPA-----G-TEGINIFYIVDLVVTLL-SWSTTAIPEDSHNDRHLASRLLGFLMSRTRHRH       | 2262              |
| HEMICHOR     | GQT-----G-GDGIHYMIGDIVVLML-TWSAI AKPEAGD--RILASRLVEYLMHHTHHSN       | 2268              |
| BELCHER      | GEA-----S-GEGINIFYIVDLLVTML-SWGPVAIPEDSAMGRALTSRLLHFLMANAFHKT       | 2261              |
| STRONG       | GQQ-----G---GINYMVLDIMLVML-DWSTLAVPEDNR----LASGVLRFLMKNSYHER        | 2258              |
| STARFISH     | GNT-----G-GEGIHYMVVDVVVLL-GWVTVAIPEDKR----LANRLEFLMHFCHHSN          | 2274              |

. : : : . \* :

Supplementary Figure 9: Clustal Omega: DNA-PKcs alignment metazoan plus “putative archaeon”

|              |                                                                                                           | <b>RYG70450.1</b> |
|--------------|-----------------------------------------------------------------------------------------------------------|-------------------|
| ARCHAEON     | PDV <b>LKENL</b> NSVCSIFPR <b>WLQ</b> LYSTSQQKTR <b>IY</b> NIAL <b>PYVPLE</b> VD <b>AI</b> IRLLNTAYTMTGGA | 2411              |
| MUDCRAB      | AD <b>VFRY</b> <b>NIDAVK</b> SV <b>VE</b> CWRAVLTV----- <b>PYAI</b> I-----YSL-----                        | 2226              |
| SCORPION     | KD <b>VFRN</b> <b>NLEMI</b> K <b>TVV</b> QCW <b>KER</b> LDI----- <b>PTYI</b> I-----FES-----               | 2229              |
| SPONGE       | RS <b>ILRN</b> <b>NLEI</b> VR <b>TM</b> VEL <b>WKD</b> KIDI----- <b>PTRV</b> L-----YDQ-----               | 2282              |
| CAPITELLA    | RQ <b>IMRN</b> <b>NLEVL</b> K <b>TLV</b> EAW <b>KST</b> IRI----- <b>PTQD</b> I-----YEN-----               | 2254              |
| DANIO        | RA <b>VFRH</b> <b>NLEI</b> I <b>IRT</b> V <b>VE</b> CW <b>KDCL</b> TI----- <b>PYDL</b> I-----YER-----     | 2267              |
| MILII        | T <b>AVFRH</b> <b>NLEI</b> I <b>IKT</b> V <b>VE</b> CW <b>KDCL</b> SV----- <b>PYSL</b> I-----FSR-----     | 2268              |
| BAMBOO       | RV <b>VFRH</b> <b>NLEI</b> I <b>IKT</b> V <b>VE</b> CW <b>KDCL</b> SI----- <b>PYSL</b> I-----FDR-----     | 2266              |
| XENOPUS      | RA <b>VFRH</b> <b>NLEI</b> I <b>IKT</b> V <b>LE</b> CW <b>KECL</b> SI----- <b>PYRL</b> I-----YEG-----     | 2279              |
| STERLET      | RA <b>VFRH</b> <b>NLEI</b> I <b>IKT</b> V <b>IE</b> CW <b>KDCL</b> AV----- <b>PYSL</b> I-----FDR-----     | 2282              |
| GAR          | RA <b>VFRH</b> <b>NLEI</b> I <b>IKT</b> V <b>VE</b> CW <b>KDSL</b> MV----- <b>PYSL</b> I-----FDR-----     | 2271              |
| LATIMERIA    | RA <b>VFRH</b> <b>NLEI</b> I <b>IKT</b> V <b>VE</b> CW <b>KDCL</b> AV----- <b>PYSL</b> L-----YQR-----     | 2270              |
| CAECIL       | RA <b>VFRH</b> <b>NLEI</b> I <b>IKT</b> V <b>VE</b> CW <b>KDCL</b> SI----- <b>PYRL</b> I-----FER-----     | 2272              |
| SNAKE        | RA <b>VFRH</b> <b>NLEI</b> I <b>IKT</b> V <b>IE</b> CW <b>KDCL</b> SI----- <b>PYRI</b> I-----FQL-----     | 2269              |
| CANARY       | RA <b>VFRH</b> <b>NLEI</b> I <b>IKT</b> V <b>IE</b> CW <b>KDCL</b> SI----- <b>PYSL</b> I-----FQR-----     | 2261              |
| OSTRICH      | RA <b>VFRH</b> <b>NLEI</b> I <b>IKT</b> V <b>IE</b> CW <b>KNCL</b> SI----- <b>PYSL</b> I-----FEK-----     | 2231              |
| GECKO        | RA <b>VFRH</b> <b>NLEI</b> I <b>IKT</b> V <b>VE</b> CW <b>KDCL</b> SI----- <b>PYRI</b> I-----FER-----     | 2270              |
| TURTLE       | RA <b>VFRH</b> <b>NLEI</b> I <b>IKT</b> V <b>VE</b> CW <b>KDCL</b> SI----- <b>PYRL</b> I-----FEQ-----     | 2270              |
| ALLIGATOR    | RA <b>VFRH</b> <b>NLEI</b> I <b>IKT</b> V <b>VE</b> CW <b>KDCL</b> TV----- <b>PYRL</b> I-----FEQ-----     | 2228              |
| PLATYPUS     | RA <b>VFRH</b> <b>NLEI</b> I <b>IKT</b> V <b>VE</b> CW <b>KDCL</b> SI----- <b>PYRL</b> I-----FEK-----     | 2263              |
| TASDEVIL     | RA <b>VFRH</b> <b>NLEI</b> I <b>IKT</b> V <b>VE</b> CW <b>KDCL</b> SI----- <b>PYRI</b> I-----FEK-----     | 2265              |
| <b>HUMAN</b> | <b>RAVFRHNLEI</b> <b>I</b> <b>IKTL</b> <b>VE</b> CW <b>KDCL</b> SI----- <b>PYRL</b> I-----FEK-----        | <b>2259</b>       |
| MOUSE        | RA <b>VFRH</b> <b>NLEI</b> I <b>IKT</b> L <b>VE</b> CW <b>KECL</b> SI----- <b>PYRL</b> I-----FEK-----     | 2255              |
| CRASSO2      | RP <b>VYRN</b> <b>NLELL</b> K <b>TL</b> L <b>QV</b> W <b>KDR</b> VEI----- <b>PYNIV</b> -----YKH-----      | 2254              |
| POMACEA      | RA <b>IFRN</b> <b>NLEML</b> K <b>TL</b> L <b>EC</b> W <b>KDCI</b> EI----- <b>PYQEV</b> -----YNO-----      | 2257              |
| TRICHOPLAX   | RS <b>VLRN</b> <b>NIEI</b> I <b>IKT</b> A <b>VEL</b> W <b>KNH</b> IEI----- <b>PYRI</b> I-----YKN-----     | 2249              |
| NEMATOSTELLA | RA <b>VFKN</b> <b>NLEI</b> IV <b>KTM</b> VE <b>VWR</b> ERVTV----- <b>PTKVI</b> -----YEA-----              | 2256              |
| PRIAPULA     | MS <b>VFRN</b> <b>NLEI</b> I <b>IKT</b> L <b>VE</b> CW <b>RDR</b> VDV----- <b>PSQVI</b> -----YEN-----     | 2281              |
| SOFTCORAL    | RS <b>IFKN</b> <b>NLEVI</b> IK <b>TF</b> VE <b>VW</b> KERIDV----- <b>PYKLI</b> -----YER-----              | 2268              |
| PISTILLATA   | RS <b>LFRN</b> <b>NLEI</b> IV <b>KSV</b> VE <b>IW</b> KSILHV----- <b>PAEVI</b> -----FNS-----              | 2294              |
| HEMICHOR     | RQ <b>VLRN</b> <b>NLEMV</b> K <b>TV</b> VEL <b>WRDC</b> IEV----- <b>PSRVI</b> -----FEA-----               | 2300              |
| BELCHER      | RA <b>VMRN</b> <b>NLELI</b> IK <b>TAVE</b> CW <b>KTR</b> VEV----- <b>PTKVI</b> -----HDQ-----              | 2293              |
| STRONG       | KS <b>VMKN</b> <b>NLEVI</b> IK <b>TL</b> VE <b>CW</b> KDVIDV----- <b>PTRVI</b> -----YES-----              | 2290              |
| STARFISH     | RQ <b>VLRN</b> <b>NLEMI</b> K <b>TL</b> VE <b>CW</b> KEIISV----- <b>PTSVI</b> -----YRI-----               | 2306              |
|              | : : * : : : . *                                                                                           | * :               |

Supplementary Figure 9: Clustal Omega: DNA-PKcs alignment metazoan plus "putative archaeon"

|              |                                                                  | <b>RYG70450.1</b> |
|--------------|------------------------------------------------------------------|-------------------|
| ARCHAEON     | HGSIYSTGSI AVR YRLAALDVVHCLLD CNY PLLVDYTLVNNVLSNFGNPN--TNITTQAL | 2469              |
| MUDCRAB      | ----MEVSDGRNKEQEAGLNLGIMLANG-----LAPY-TED--SVAEKTKC              | 2266              |
| SCORPION     | ----MRNLDTKVKDNIVG IQLF GIVV SNG-----LDPY-QNT--SRIDKISY          | 2269              |
| SPONGE       | ----FSNSDKSTVSNLSGIQLVGI AVANE-----LNPY-DTNTAGSLDQGLY            | 2324              |
| CAPITELLA    | ----FIDREDK GKRN VVGLQIVGVFLANG-----LSPW-QPD--AEVSKDRF           | 2294              |
| DANIO        | ----FAGTDPNSKDNSVGIQLLGIVMANN-----LPPY-DAA--CGIEH DRY            | 2307              |
| MILII        | ----FSSTDPNSKDNSVGIQLLGIVLANN-----LSPY-VPK--CEIGYERY             | 2308              |
| BAMBOO       | ----FAGRDPNTKDNSVGIQLLGIVLANN-----LPPY-DCK--CEIDSERF             | 2306              |
| XENOPUS      | ----FSGTDPNTKDNSVGIQLLGLALANN-----FSPL-DPK--CGIDPERY             | 2319              |
| STERLET      | ----FSGKDPNSKNSVGIQLLGIVLANN-----LPPY-DPK--CGIDSESY              | 2322              |
| GAR          | ----FAGSDPNSKDNSVGIQLLGIVLANN-----LPPY-DPS--CGIEHERY             | 2311              |
| LATIMERIA    | ----FSGKDPNTKDNTVGIQLLGIILANN-----LPPH-DPT--CSIDMESY             | 2310              |
| CAECIL       | ----FSNGNTNSKDNSVGIQLLGLILANN-----LPPY-DPK--CGIDVERY             | 2312              |
| SNAKE        | ----FS-GDPNTKDNSVGIQLLGIVLANN-----LPPY-DPK--CEIDSIRY             | 2308              |
| CANARY       | ----FSSGDPDTKDNSVGIQLLGIVLANN-----LPPF-DPK--CEIDRVRY             | 2301              |
| OSTRICH      | ----FSGGDPNTKDNSVGIQLLGIVLAND-----LPPF-DPK--CEIDRVRY             | 2271              |
| GECKO        | ----FSGGDPNTKDNSVGIQLLGIVLANN-----LPPY-DPK--CEIDNVRY             | 2310              |
| TURTLE       | ----FSGGDPNTKDNSVGIQLLGIVLANN-----LSPY-DPK--CEIDSVRY             | 2310              |
| ALLIGATOR    | ----FSGGDPDTKDNSVGIQLLGIVLANN-----LPPY-DPK--CEIDSTRY             | 2268              |
| PLATYPUS     | ----FATGDPNTKDNSVGIQLLGIVLANN-----LPPY-DPK--CGIDSARY             | 2303              |
| TASDEVIL     | ----FSNRDPNSKDNSVGIQLLGIIMANN-----LPPY-DSK--SGIESTRY             | 2305              |
| <b>HUMAN</b> | <b>----FSGKDPNSKDNSVGIQLLGIVMAND-----LPPY-DPQ--CGIQSSEY</b>      | <b>2299</b>       |
| MOUSE        | ----FSHKDPNSKDNSVGIQLLGIVLANN-----LPPY-DPN--CDITSAMY             | 2295              |
| CRASSO2      | ----LKQPDETKKESCVGIQLMGVLSAK-----FPPY-APT--APVDQEKF              | 2294              |
| POMACEA      | ----LKMPDPSSKSSLI GIQVLGVIMTCN-----YAPY-GPS--ASVDRNRY            | 2297              |
| TRICHOPLAX   | ----FSNPDKDKKDNSTGIQCLGLV VANG-----LSPY-RYD--VEVDEM--            | 2287              |
| NEMATOSTELLA | ----LSNPHPKKDNATGIQLLGIVLANK-----IHPF-SSD--SSVDENTF              | 2296              |
| PRIAPULA     | ----MCAGDITMRDNSVGVQLLGIVVANN-----LPPY-SHT--TAVDSEKF             | 2321              |
| SOFTCORAL    | ----FSNASVNTKENS VGIQLMGVIVANK-----ITPF-KPG--CGVDEKRF            | 2308              |
| PISTILLATA   | ----FSDPDPVKKDN AVGIQLLGIVVANG-----LFPV-TSD--STIDEDRF            | 2334              |
| HEMICHOR     | ----FSGKDPKGENATGIQLLGIVLSNQ-----LPPY-RDT--CGIDKDRF              | 2340              |
| BELCHER      | ----LCGS DASSKANSVGIQLLGIVLANQ-----LPPF-NPSTSGNIDREQF            | 2335              |
| STRONG       | ----LQDRSPDKKDSAVGIHLLGVILANN-----LHPL-SPT--CDVDADRF             | 2330              |
| STARFISH     | ----LATPDPDVKDSSTGLQLLGIVLANG-----LHPI-DKA--SDIDEERF             | 2346              |

... :

Supplementary Figure 9: Clustal Omega: DNA-PKcs alignment metazoan plus “putative archaeon”

|              |                                                                  | <b>RYG70450.1</b> |
|--------------|------------------------------------------------------------------|-------------------|
| ARCHAEON     | LQAILDNLIS-ISRKELVQSSCQVIGQILDLLNAHSMQAKQVLLYSQLGEFENKVVDIIDG    | 2528              |
| MUDCRAB      | EKILLKLE-AHYASIIYGAAAEEVGLVLKQSSHSEDCN-----ETSFEENVARKVME        | 2318              |
| SCORPION     | LKTLTVNLK-NKYKEIYESASEVCGMSMKYFDDKDDV-----YSEFCKIVKTEISS         | 2320              |
| SPONGE       | YKIFVNNLT-FKYKLIYAAAEEVGMIMKRMAESYDPF-----LDRLEEMVGEQLFK         | 2375              |
| CAPITELLA    | YQYLAMNMN-QPDKQVYSASAEIVGMALSSLQNTESDKE-----WCRA YGDNIQKMLLG     | 2347              |
| DANIO        | FQSLANNLSFIRYKEVYAAAEEVIGLILNYMTERENQI-----EGTLFNITVTKLMD        | 2359              |
| MILII        | FQRLVYNI SLTRYKEYVYAAAEEVGLV LHYFAENEKQV-----DGLVHDLIAKELKQ      | 2360              |
| BAMBOO       | FQRLVHNI SLTRYKEYVYAAAEEVGLV LQYLAG--KPM-----DCAVHDLVVKELQQ      | 2356              |
| XENOPUS      | FQSLANNLGLTRFKEYVYIAAAEEVIGLV LRYIVQNEKRT-----EAPVFDYVVKELKR     | 2371              |
| STERLET      | FQALATNIFSGRFKDIYAAAEEVIGLIMQYLAKNEKQL-----EGPIFDFTVKELKH        | 2374              |
| GAR          | FKSLANNISFVRYKDIHVAAAEEVIGLVMQYMAEKEKQS-----EGPIFDFTAHHLKK       | 2363              |
| LATIMERIA    | VKALANNLSFTRYKEYVYAAAEEVGLV LQYRAEKEKEL-----GGPIIDSVVRELKQ       | 2362              |
| CAECIL       | FQALANNIALTKYKDIYLAEEVGLALHYVAEKEKTL-----EGPLFDCVIKELKQ          | 2364              |
| SNAKE        | FQALSNNIALIRYKEYVYVAAAEEVGLILQYIAEKENTF-----EGPIYDMVIKQLKL       | 2360              |
| CANARY       | FQALTSNMGLLKYREVYAAAEEVGLALQYIAERENIL-----EDPVYDCVIKQLKH         | 2353              |
| OSTRICH      | FQALISNMGLLKYREVYAAAEEVGLALRYVAERENIL-----EDPAYDCVIKQLKH         | 2323              |
| GECKO        | FQALANNMALVRYKEYVYAAAEEVGLV LQYIAEKENIY-----ESPVFDIIKQLKQ        | 2362              |
| TURTLE       | FQDLANNMSLIRYKEYVYAAAEEVGLILQYMAEKENIF-----EGPVYDCVIKRIEQ        | 2362              |
| ALLIGATOR    | FQALVNNMALLKYKEYVYAAAEEVGLTLRYIAEKENIT-----EGPIYDCVVKQLKQ        | 2320              |
| PLATYPUS     | FQALANNLSLVKYKEYVYAAAEEVGLTLQYVSEKETML-----EDSICELIVKQLKQ        | 2355              |
| TASDEVIL     | FQALVNNMSFIKYKEYVYAAAEEVGLILQYIAKKENVL-----EDSVFELVVKQLKQ        | 2357              |
| <b>HUMAN</b> | <b>FQALVNNMSFVRYKEYVYAAAEEVGLILRYVMERKNIL-----EESLCELVAKQLKQ</b> | <b>2351</b>       |
| MOUSE        | FEALVNNMSFVKYKEYVYAAAEEVGLILQYITERKHVI-----AELVCELVIKQLKQ        | 2347              |
| CRASSO2      | FTTVAQYMR-NRYKAVYAAATAEIVGMIFKHLAEKDRQT-----EGTFHDYVVNLMNS       | 2345              |
| POMACEA      | FTTLASSMT-NSSKMIFAAAAEEVGMVFAYLADKENET-----DGQFHSHVESVL--        | 2346              |
| TRICHOPLAX   | -LALAENLQ-FKYKEYVEAAAEVGMIMKHLASVKKET-----EGPIFDYVTQHLS          | 2337              |
| NEMATOSTELLA | YTALSDNLT-FKYKDVHAPAAEVS GMLMKYLI EERKVT-----ECSLIALVEAKLSP      | 2347              |
| PRIAPULA     | FQAIVRCLA-NKYKEYVYAAAEEVGMILHRMVEREDEEA-----EGALRDAVVTAMST       | 2373              |
| SOFTCORAL    | YQDLVKNLS-FKYKDVHGAEEVIGMILKYLSEENDKES-----CDGLSGLLNEKLS         | 2360              |
| PISTILLATA   | YGTLVNNLT-FKYKDVHAAAEEVIGLLMMQLAKVKKIF-----DGPLHDMVGQKLLS        | 2385              |
| HEMICHOR     | YTTLSANLS-FKYKDVYAAAEVGV-MKYMAEKEKVT-----DGT FHDNVFREISS         | 2390              |
| BELCHER      | FSAVAKNLQLTRYKDVYAAAEEVIGMIMKYMADVEKVT-----EGSFHTQVERYLLP        | 2387              |
| STRONG       | YSALASNID-NRYKAVHGAEEVIGMAMKQMAENDKIT-----DGRLHEVTYKELSQ         | 2381              |
| STARFISH     | YAALSYNLK-NRYKMHAAAEEVIGMAMKQKADVVKVT-----DGFLHSIVTSELTK         | 2397              |

. : : .: \* :

Supplementary Figure 9: Clustal Omega: DNA-PKcs alignment metazoan plus “putative archaeon”

|              |                                                              | <b>RYG70450.1</b> |
|--------------|--------------------------------------------------------------|-------------------|
| ARCHAEON     | K-DKAKRGKETVVYCYKCILANYSGLKREMICRPLLWFNSFTFQGRYSY--LEMLLRHN  | 2585              |
| MUDCRAB      | M---MHSKQGQGITVIYKIHLHFPAVLK-----RVMNRLLSVLPNLY              | 2357              |
| SCORPION     | L-----NAKDQYLTCLYKINTHFPIFID-----SSFLNKILYMLPNVH             | 2358              |
| SPONGE       | LSQPLEKSEDKFITCLHKITLCYNKIVP-----RFVEKLLFLLPSLQ              | 2417              |
| CAPITELLA    | I---HGKPDQFLTCTVHCIQKHFSAFVE-----RFIHKVLFMLPGLY              | 2386              |
| DANIO        | LR--KKEVDDKFIVCLSKVSKHFPPDVD-----RFINPVFYLLPKLH              | 2399              |
| MILII        | LQ---QSKEDKFIVCLSKIIVKNYPPFAD-----RRFLNQVFYLLPKLH            | 2400              |
| BAMBOO       | LQ---NTKEDKFIVCLSKIIVKHFPFAD-----RFMNAVFFLMPKLY              | 2395              |
| XENOPUS      | HQ--TNNKEDKFIMCLNKVVKNFPFAD-----RFMTIVLFLPKLH                | 2411              |
| STERLET      | LQ---NTKEDKFVECLSKVVKNFPPLVD-----RFLNAVLFLLPKLH              | 2413              |
| GAR          | LQ---NEKEDKFVVCLSKVVKNFPFMD-----RFVNAVFFLMPKM                | 2402              |
| LATIMERIA    | LQ---SIKEDKFIVCLSKIIVKNFALLAD-----RFMSVVFLLPKLH              | 2401              |
| CAECIL       | HQ---NAKEDKFIMCLNKVVKNFSPAD-----RFMTVVLFLPKLH                | 2403              |
| SNAKE        | HQ---NTRDDKFIVCLNQITKNFPPLAD-----RFMSFVFFLIPKLH              | 2399              |
| CANARY       | HQ---NTQHDKFIQCLNKVVKNFPPLAD-----RFMNAVFFLIPKLH              | 2392              |
| ONSTRICH     | HQ---NTQQDKFIQCLSKVVKSFPPLAD-----RFMSAVFFLIPKLH              | 2362              |
| GECKO        | HQ---NTREDKFIICLNKLAKNFPPLAD-----RFMNTVFFLIPKLH              | 2401              |
| TURTLE       | HQ---STKEDKFIVCLNKVAKNFPPLAD-----RFMNAVFFLIPKLH              | 2401              |
| ALLIGATOR    | HQ---NTKEDKFILCLNKVVKTFPPVAD-----RFINAVFFLIPKLH              | 2359              |
| PLATYPUS     | HQ---NSREDKFIVCLNKAVKNFPPLAD-----RFLNAVFFLIPKLH              | 2394              |
| TASDEVIL     | HQ---NTKEDKFIVCLNKAVKTFPPAD-----RFMNAVFFLIPK                 | 2396              |
| <b>HUMAN</b> | <b>HQ---NTMEDKFIVCLNKVTKSFPPLAD-----RFMNAVFFLIPK</b>         | <b>2390</b>       |
| MOUSE        | HQ---NTMEDKFIVCLNKIAKGFPPAD-----RFLNALFFLIPK                 | 2386              |
| CRASSO2      | L---QQSNPGNFFLLCIHRMHLHYPPAD-----RFMNRLLFVLPNLH              | 2384              |
| POMACEA      | ---GKVAPHNFLVCVHCIHRHYPPMAD-----RFLNKLLFMLPGLH               | 2384              |
| TRICHOPLAX   | MVSAGRMDVARFILCLYRVQLHYPIAD-----RFVNKVLFLMPSLY               | 2379              |
| NEMATOSTELLA | MATKGGKDIGKFITCVHRLQLNYPRIVD-----RFMKHIMFHLPTIH              | 2389              |
| PRIAPULA     | L---HADAKQNFIVCLQKMTLHYPAIADREVMTAVSDRYLGQVCGDRLMSKLLFMLPSLQ | 2430              |
| SOFTCORAL    | ---MTKDLDKFILCVHQLQIHFPPIVD-----GFINQILFVQHVH                | 2398              |
| PISTILLATA   | LVNRAKPELDFITCVHKLKLNYPPIVD-----RFVNQILFTLPSVH               | 2427              |
| HEMICHOR     | S---QSSRPEVFITCIYKVQLYYKPFDT-----RFINKLLFMLPQIH              | 2429              |
| BELCHER      | L---QVNQQDVFITCVHKIHLHFPPFAD-----RFVSKLLFMLPKLH              | 2426              |
| STRONG       | LH-LGSGKEVIFITCLHKIHLHYPVFTD-----RFMNKLLFMLPSIH              | 2422              |
| STARFISH     | I---SEIKPDVFTTCIHKLHFHYPEFAD-----HFTNKLFLMLPSLH              | 2436              |

: : . : :

Supplementary Figure 9: Clustal Omega: DNA-PKcs alignment metazoan plus "putative archaeon"

|              |                                                                                                                                                                                                                                    | <b>RYG70450.1</b> |
|--------------|------------------------------------------------------------------------------------------------------------------------------------------------------------------------------------------------------------------------------------|-------------------|
| ARCHAEON     | SIFVKS <span style="color:blue">G</span> TDCS <span style="color:red">HVM</span> ILELVRSFIK <span style="color:red">P</span> MLVDRNVTAIGRGAGMVKI <span style="color:red">P</span> LLQVYAL <span style="color:red">I</span> LLTKHIQ | 2645              |
| MUDCRAB      | GIF---CTR <span style="color:red">VLECL</span> -----ASYSSS-----ME--DI <span style="color:red">Y</span> SHLKEHNVLG                                                                                                                  | 2389              |
| SCORPION     | GIF---RKQ <span style="color:red">ILEII</span> -----NSHVEN-----IE--NA <span style="color:red">FAEL</span> KNQGLLN                                                                                                                  | 2390              |
| SPONGE       | GVF---RSS <span style="color:red">CLEIL</span> -----DTQADV-----QP--Q <span style="color:red">F</span> Y <span style="color:red">LKL</span> KDKGFHT                                                                                 | 2449              |
| CAPITELLA    | GVF---RTYA <span style="color:red">LEII</span> -----AAGIEN-----IE--GA <span style="color:red">FVEI</span> KNKNIIG                                                                                                                  | 2418              |
| DANIO        | GML---KTH <span style="color:red">CLECV</span> -----LSRADV-----IP--EI <span style="color:red">FLHL</span> KTKGLSQ                                                                                                                  | 2431              |
| MILII        | GVL---KTH <span style="color:red">CLEVV</span> -----MHRAET-----II--DI <span style="color:red">FQEL</span> KNKNFVQ                                                                                                                  | 2432              |
| BAMBOO       | GIL---KTH <span style="color:red">CLEVV</span> -----MYRAEE-----IP--DI <span style="color:red">HIQL</span> KSKDFTQ                                                                                                                  | 2427              |
| XENOPUS      | GVL---KTQ <span style="color:red">CLEII</span> -----MHRAED-----IP--DL <span style="color:red">FIEL</span> KNKDFCQ                                                                                                                  | 2443              |
| STERLET      | GVL---KTH <span style="color:red">CMEIL</span> -----MSRAEE-----VT--DI <span style="color:red">YLQL</span> KSKDFAQ                                                                                                                  | 2445              |
| GAR          | GVL---KTH <span style="color:red">CLECI</span> -----LSRAEE-----IP--DV <span style="color:red">YLQL</span> KSKDFSQ                                                                                                                  | 2434              |
| LATIMERIA    | GVL---KTH <span style="color:red">CLEVV</span> -----MSRAEE-----IP--DI <span style="color:red">FLQL</span> KSKDFIQ                                                                                                                  | 2433              |
| CAECIL       | GVL---KTY <span style="color:red">CLEVV</span> -----MCRAEE-----IP--DL <span style="color:red">YIQL</span> KSKDFNQ                                                                                                                  | 2435              |
| SNAKE        | GVM---KTH <span style="color:red">CLEVV</span> -----MCRAQE-----IP--DM <span style="color:red">YLEL</span> KSKKEFIQ                                                                                                                 | 2431              |
| CANARY       | GVM---KTY <span style="color:red">CLEVI</span> -----MCRAEE-----VP--DL <span style="color:red">HLQL</span> KSKDFIQ                                                                                                                  | 2424              |
| OSTRICH      | GVM---KTH <span style="color:red">CLEVI</span> -----MCRAEE-----IT--DL <span style="color:red">HLQL</span> KSKDFLQ                                                                                                                  | 2394              |
| GECKO        | GVM---KTY <span style="color:red">CLEVV</span> -----MGRAHG-----IP--SL <span style="color:red">YLEL</span> KSKDFTQ                                                                                                                  | 2433              |
| TURTLE       | GVL---KTY <span style="color:red">CLEVV</span> -----MYRAEE-----IT--DL <span style="color:red">YLQL</span> KSKDFIQ                                                                                                                  | 2433              |
| ALLIGATOR    | GVL---KT <span style="color:red">S</span> C <span style="color:red">LEVV</span> -----MCRAEE-----IT--DL <span style="color:red">YLQL</span> KSKDFMQ                                                                                 | 2391              |
| PLATYPUS     | GVM---KT <span style="color:red">F</span> C <span style="color:red">LEVV</span> -----LCRAEE-----IT--DL <span style="color:red">YLQL</span> KSKDFAQ                                                                                 | 2426              |
| TASDEVIL     | GVM---KT <span style="color:red">L</span> C <span style="color:red">LEVV</span> -----LCRAEE-----IH--DL <span style="color:red">YLQL</span> KSKDFIQ                                                                                 | 2428              |
| <b>HUMAN</b> | <b>GVL---KT<span style="color:red">L</span>C<span style="color:red">LEVV</span>-----LC<span style="color:red">R</span>VEG-----MT--E<span style="color:red">L</span>Y<span style="color:red">FQL</span>KSKDFVQ</b>                  | <b>2422</b>       |
| MOUSE        | GVM---KT <span style="color:red">L</span> C <span style="color:red">LEVV</span> -----LCRAEE-----IT--GL <span style="color:red">YLQL</span> KSKDFLQ                                                                                 | 2418              |
| CRASSO2      | AEF---RNR <span style="color:red">CLEIV</span> -----LTRIDT-----LE--NV <span style="color:red">YVEL</span> KSKGLLA                                                                                                                  | 2416              |
| POMACEA      | GEF---RVQ <span style="color:red">CLEVI</span> -----MGCIEQ-----LD--DA <span style="color:red">FREL</span> QSKGLLN                                                                                                                  | 2416              |
| TRICHOPLAX   | GEF---KTK <span style="color:red">LEII</span> -----LARADH-----IK--E <span style="color:red">L</span> Y <span style="color:red">TEL</span> RNKGLKD                                                                                  | 2411              |
| NEMATOSTELLA | GVF---KAQ <span style="color:red">CLEIV</span> -----LSRVSD-----IP--DL <span style="color:red">FTEL</span> RSKGLNV                                                                                                                  | 2421              |
| PRIAPULA     | GSF---RSQ <span style="color:red">CLEVI</span> -----LTRVAH-----TQ--NL <span style="color:red">FLEL</span> KSKGFLG                                                                                                                  | 2462              |
| SOFTCORAL    | AQF---KT <span style="color:red">L</span> C <span style="color:red">LEII</span> -----LSRVGV-----IP--NL <span style="color:red">FLEL</span> KTKGFLN                                                                                 | 2430              |
| PISTILLATA   | GDF---KSY <span style="color:red">CLEIL</span> -----CSRVEH-----IP--NL <span style="color:red">FTEL</span> KGRGLKE                                                                                                                  | 2459              |
| HEMICHOR     | GQP---KTYA <span style="color:red">LEV</span> V-----LGRVDS-----ID--KI <span style="color:red">FLEM</span> KNKRILE                                                                                                                  | 2461              |
| BELCHER      | GIF---RTH <span style="color:red">CLEVI</span> -----RGRVNV-----ID--NL <span style="color:red">FLEL</span> KTRNFLG                                                                                                                  | 2458              |
| STRONG       | GQP---KTE <span style="color:red">CQII</span> -----TARIEH-----ID--NA <span style="color:red">FIEM</span> KNKNILA                                                                                                                   | 2454              |
| STARFISH     | GQP---KT <span style="color:red">L</span> C <span style="color:red">LEVV</span> -----ASRVSH-----IP--NI <span style="color:red">FLEM</span> KSKGIVE                                                                                 | 2468              |
|              | . . :                                                                                                                                                                                                                              | . :               |

Supplementary Figure 9: Clustal Omega: DNA-PKcs alignment metazoan plus "putative archaeon"

|              |                                                                 |     | <b>RYG70450.1</b> |
|--------------|-----------------------------------------------------------------|-----|-------------------|
| ARCHAEON     | HICNTSEGRQDPETKQHNETVQLQEVLSIIIGKDETVAVRYCINA-----NNHVSVRYA     |     | 2698              |
| MUDCRAB      | LLSKKEESTQLV-----SLELVNAVLPRLTPSQVLYFLPG-ITGFASHPGAKCREM        |     | 2439              |
| SCORPION     | MLEHRDESIQFS-----SLNIIQKLLKELDIDKMLNVFPI-ISKVHKSAETICRKV        |     | 2440              |
| SPONGE       | MI SHRDEATQTA-----SLSIVQKLLVQLTNDQLSEIVPILIASFSKHGSIQCRIV       |     | 2500              |
| CAPITELLA    | ILRERDELSQLM-----SLKII RRLLLEKLEASQLLYLLPA-ICEISDLSSVLCRRE      |     | 2468              |
| DANIO        | IMSHKDEGRQRV-----CLDI IHKILACLKPEELKEILGA-VTAFASHPSPVCRER       |     | 2481              |
| MILII        | IMSYSDERQRI-----CLDIVYKIIAKLKAEVKVFLVP-VIAFISHPSPVCRER          |     | 2482              |
| BAMBOO       | IMSHRDEDRQRV-----CLDIYRIKAKLKSAE LKELLRS-VVAFISHPSPICRER        |     | 2477              |
| XENOPUS      | IMNRRDDRQRV-----CLDIYKILSKLTPAELHEFLIP-VTAFSSHSFPVCRER          |     | 2493              |
| STERLET      | IMSHRDEMRQRV-----CLDIVHKILAKLKPVELKELLIS-VTAFTTHPSPVCRER        |     | 2495              |
| GAR          | VM SHRDEARQRV-----CLDI IHKIMAKLKPVEMREMLGA-VTSFVTHPSPVCRER      |     | 2484              |
| LATIMERIA    | LMNHRDDARQRV-----CLDIVYKIMFKLKPVEMKEFLVA-VTGFISHPSTVCRER        |     | 2483              |
| CAECIL       | IMSHRDDDRQKV-----CLDIYKMLPKLKPME L GELLNT-VVTFSSHSPSPMCRER      |     | 2485              |
| SNAKE        | VMCHRDDRQRI-----CLNIVYKMLPKLKP AEVLELLPS-VTGFISHPSPLCRGQ        |     | 2481              |
| CANARY       | IMNHRDDRQRV-----CLDIVHKMLSKLKPLE LKELLPG-VTGFISHPSVMCQRQ        |     | 2474              |
| ONSTRICH     | IMNHRDDRQRV-----CLDIVYKMLPKLKP LE LKELLPG-VTGFISHPTVICRQR       |     | 2444              |
| GECKO        | IMSHRDDRQTV-----CLDIVYKMLAKLTPAEVQELLPT-VTGFITHPSPLCRGR         |     | 2483              |
| TURTLE       | VMSHRDDRQRV-----CLDIVYKMLPKLKP LE LRELLPG-VTGFISHPSPVCRER       |     | 2483              |
| ALLIGATOR    | VMNRRDDRQRV-----CLDIYKMLSKLKP LE LRELLPG-VTGFISHPSPVCRER        |     | 2441              |
| PLATYPUS     | VMRHRDDRQRV-----CLDIYKMLAKLKPGE LRELLNV-VVEFISHPSPVCREQ         |     | 2476              |
| TASDEVIL     | IMRHRDDRQKV-----CLDIYTMLAKLKPVE LQELLNC-VVEFISHPSPVCREK         |     | 2478              |
| <b>HUMAN</b> | <b>VMRHRDDRQKV-----CLDIYKMMPKLKPVE LRELLNP-VVEFVSHPSSTTCREQ</b> |     | <b>2472</b>       |
| MOUSE        | VMRHRDDRQKV-----CLDIVYKMVAKLKPIELRELLNP-VVEFVSHPSPTCREQ         |     | 2468              |
| CRASSO2      | FLTHRDETQVI-----ALKIVKSIQSKLQPS EVSELLPL-ICGFCVSPSIPCRNV        |     | 2466              |
| POMACEA      | FLTQRDEDTQIV-----ALGIVNAMVPKLSATE LQTFLLPA-ITGFSNHPSVTQRQI      |     | 2466              |
| TRICHOPLAX   | MLLHRDESKQOV-----SLDLVRAMLKNLDISQ ILYLAEL-VATFKTNPSAACRQK       |     | 2461              |
| NEMATOSTELLA | MFEHRDEGVQVA-----LLKIIQGLLEK LKMSEIEYVVPS-IATMATSSSTACREL       |     | 2471              |
| PRIAPULA     | MITHRDEATQLA-----SLHITNALLSSLSPG ELLFLLPA-VTSIGTHPRAPCRQL       |     | 2512              |
| SOFTCORAL    | TLTHRDEATQVA-----CLR IILGRLSQMSVGD IQTLLPS-VTDFLSSKSVACRGL      |     | 2480              |
| PISTILLATA   | MLSQRDDGIQIG-----VLR IIKHLMK KLTIPELKFIFPL-LTSFVSHPNLLCRDL      |     | 2509              |
| HEMICHOR     | MLRHRDETIQLV-----SLKIVNSMLKRLNEE ELLYLMPT-VVSFSKNLSPACRET       |     | 2511              |
| BELCHER      | MLTHRDDGLQAI-----VLQIVYALLQKLKVE ELLYLLPS-VAAFASHPAPECRRT       |     | 2508              |
| STRONG       | LLTHKDEADQLT-----SLKLV DGMLPKLKPSELRYLLPA-VKDFVSHPSPSCRDT       |     | 2504              |
| STARFISH     | LLTHRDEGTQLV-----SLKLVNAML PNLKPDEILYLLPP-VRTVFNLPSPACREV       |     | 2518              |
|              | : : *                                                           | : : | *                 |

Supplementary Figure 9: Clustal Omega: DNA-PKcs alignment metazoan plus "putative archaeon"

|              |                                                               | <b>RYG70450.1</b> |
|--------------|---------------------------------------------------------------|-------------------|
| ARCHAEON     | AYNLLISIFI-YREKLL--AG--SSSKDVLQSIQVQLLLNGLNDPDGDIYSKTDVAGQLPK | 2753              |
| MUDCRAB      | MYDILFWIYDNFRESSD-----SEGSQIEAKTRVSLAQVKEKDAAL-----           | 2481              |
| SCORPION     | MYEIMMHAYEKFNNTKNG-----IKEKEISRYAKEMLLHGLADSDLTL-----         | 2482              |
| SPONGE       | LYNILMRVYNKLCDDQSESD--DSVKMIRSISRQQLLGLGDESNEV-----           | 2546              |
| CAPITELLA    | MYQILMWCYDNYKDEAQS-----ESRDEIITLTKDVLLRGLSDDDLTN-----         | 2511              |
| DANIO        | MYDILMWIQDNYSDES-RED--STSVEVLSVARETLLQGLTDENYGL-----          | 2526              |
| MILII        | MYDILMWIYDNYRDAES-QSD--PDSKAVFVTTKDTLLQGLTDENPAL-----         | 2527              |
| BAMBOO       | MYDILMWIYDNYRDPES-QSD--PDSKEIYTETSDALLQGLTDENPAL-----         | 2522              |
| XENOPUS      | MYDIFMWIYDNYRDHES-QND--SKSVEVFNMMAKEGLLQGLVDENDEL-----        | 2538              |
| STERLET      | MYDILMWIHDNYRDPES-QSD--SVSTEVFNLAKETLLQGLTDENQGL-----         | 2540              |
| GAR          | MYDILMWIHDNYRDPES-QSD--SDSLEMLNVAKETLLQGLVDENQGL-----         | 2529              |
| LATIMERIA    | MYEILMWIHDNYRDQES-QAN--NESREVLKLASEVLLQGLTDENPGL-----         | 2528              |
| CAECIL       | MYDILMWIYDNYRDPES-QAN--DDSQEVFSRANDVLLQGLIDENAGL-----         | 2530              |
| SNAKE        | MYDVLMWIYDNYSDSES-QAD--EESQLLKVAKESLLQGLIDENSGL-----          | 2526              |
| CANARY       | MYDILMWIYDNYSDPES-QAD--DDSREILKVAKESLLQGLIDENAEL-----         | 2519              |
| OSTRICH      | MYDILMWIYDNYSDPES-QAD--GDSQEVFLAKEILLQGLTDENAEL-----          | 2489              |
| GECKO        | MYDILMWIYDNYRDPES-QAD--EKSSEVFKLAKEVLLQGLIDENSGL-----         | 2528              |
| TURTLE       | MYDILMWIYDNYRDPES-QAE--EESQEVFKLAKEMLLQGLMDENSGL-----         | 2528              |
| ALLIGATOR    | MYDIMMWIYDNYRNSES-QAD--EDSQEVFKVAKEMLIQGLTDEISEL-----         | 2486              |
| PLATYPUS     | MYNILMWIHDNYRDPES-QAD--EESREVFKLAKEILLQGLVDENHGL-----         | 2521              |
| TASDEVIL     | MYNILMWIHDNYRDLES-QTD--EVSQEVFLAKEVLLQGLMDDNLGL-----          | 2523              |
| <b>HUMAN</b> | <b>MYNILMWIHDNYRDPES-ETD--NDSQEIFKLAKDVLIQGLIDENPGL-----</b>  | <b>2517</b>       |
| MOUSE        | MYNILMWIHDNYRDQES-QND--EDSQEVFKLAKDVLIQGLIDENVGL-----         | 2513              |
| CRASSO2      | MYDILMWVYDNYREDES-----ETADTIMQQTKESSLKGLGDEDMQC-----          | 2508              |
| POMACEA      | MMKILMWTYDNYRDNES-----KEGQEIIMKVTOESLLQGLCDNLHC-----          | 2508              |
| TRICHOPLAX   | MYGIFMWIYDNYRQEIIDK--N--DETKQLINFCKDQLLQGLNDSSEEN-----        | 2505              |
| NEMATOSTELLA | IYDIFMWVYDNYRSDYRNE--EGSEEILATAKDYLLRGLADDNKIL-----           | 2517              |
| PRIAPULA     | MYDILMWVYDSYRDESEG-----EEDKSLASLARDSLLQGLNDSDDL-----          | 2554              |
| SOFTCORAL    | MFDILWIYDNYRFDYRDETFKNEDSEGSEDLVLCRTKNVLLQGLADENKEM-----      | 2528              |
| PISTILLATA   | MYDIFIWIYDSYRADEAFQAE--EGSADILADAKDHLLQGLADHRDL-----          | 2555              |
| HEMICHOR     | MYDILTWIYDNYKDEES-ST-----AAEVLSTKEILLQGLSDEESYL-----          | 2553              |
| BELCHER      | MYDIMMWIYDNYREEAS-QQE--S-AGRVLGTAKDCLLQGLSDEESYL-----         | 2552              |
| STRONG       | MYSILMWIYDNYRDEDK-REG--QDGDEALSIAKDTLLQGLSDQDNYL-----         | 2549              |
| STARFISH     | MYDILMWIYDNFRDEES-RTE--DGADDILCMADKDTLLQGLSDEEASH-----        | 2563              |

::

\*: .: :

Supplementary Figure 9: Clustal Omega: DNA-PKcs alignment metazoan plus "putative archaeon"

|              |                                                              | <b>RYG70450.1</b> |
|--------------|--------------------------------------------------------------|-------------------|
| ARCHAEON     | DSNILDSISNDSIQKYISPAYWSKRS--PRKQIKQLIYEFFQGYYLINCVN---IGQGLH | 2808              |
| MUDCRAB      | -----RQTVLNFWLERFQ-DMVLHDRVLIHI-LKMIYSPETEDSF-----           | 2518              |
| SCORPION     | -----RLTVHNFWSQNNHLP AETFSRIKAV-LQKMYSPEIEHMFSSDECFT         | 2527              |
| SPONGE       | -----KLKMYEYWNQESNLSNTLDRLTQL-LVTLYSKKTETQF-----             | 2584              |
| CAPITELLA    | -----RLTVQNFWSHETRLPGETVERLVAM-LEAMYTPSTELHY-----            | 2549              |
| DANIO        | -----OLYVRNFWSHESRLPPETLERMLVV-LKSLYSSRIEEQF-----            | 2564              |
| MILII        | -----OLYVRNFWGHENRLPTGTHDRMLAI-LRSMYSNKIETQY-----            | 2565              |
| BAMBOO       | -----OLYVRNFWSHENRLPTGTLDRMLAS-LGSLYCNKIETQY-----            | 2560              |
| XENOPUS      | -----QLIVRNFWSDETRLPSNTTERMLAI-LSSLYSPKIEKHY-----            | 2576              |
| STERLET      | -----OLYVRNFWSHESRLPTSTLERMLVV-LRSLYSSKIEAHY-----            | 2578              |
| GAR          | -----OLYVRNFWSHETRLPTTTLERMLVI-LRSLYSSKIEAQY-----            | 2567              |
| LATIMERIA    | -----OLYVRNFWSDENRLPVGTLDRMLVI-LKAFYCNKIETQY-----            | 2566              |
| CAECIL       | -----QLTVRNFWSDETRLPVVTTDRMLAL-LNSFYSPKIESHY-----            | 2568              |
| SNAKE        | -----QLIVRNFWSDETRLPTNTLDRMLSL-LRGLYSDKIETQY-----            | 2564              |
| CANARY       | -----QLIVRNFWSHETRLPTNTLDRMLSL-LSSFYSTKIEETHY-----           | 2557              |
| OSTRICH      | -----QLIVRNFWSDETRLPANILDRMLAL-LNSFYSTKIEETHY-----           | 2527              |
| GECKO        | -----QLIVRNFWSDETRLPGNTLDRMLTL-LSSLYSTKTETQY-----            | 2566              |
| TURTLE       | -----QLIVRNFWSDETRLPTNTLDRMLAL-LNSLYSTKIEETHY-----           | 2566              |
| ALLIGATOR    | -----QLVVRNFWSDETRLPTNTLDRMLAL-LNSFYSTKTETQY-----            | 2524              |
| PLATYPUS     | -----QLIVRNFWSNETRLPSNILDRLA--LNSFYSTKIEEMHY-----            | 2558              |
| TASDEVIL     | -----QLIIRNFWSHETRLPSNILDRLA--LRSLYSTKIEEMHF-----            | 2560              |
| <b>HUMAN</b> | ----- <b>QLIIRNFWSHETRLPSNTLDRLA--LNSLYSPKIEVHF-----</b>     | <b>2554</b>       |
| MOUSE        | -----QLIIRNFWSHETRLPSNTLDRLA--LNSLYSPKIEVHF-----             | 2550              |
| CRASSO2      | -----RLLVQNFWSSETRVPGNTLDRLVAM-LEAMYSPVTEKQF-----            | 2546              |
| POMACEA      | -----RLTMQNFWSSESRLPDGTVDRMISI-LEAMYTPGSECNY-----            | 2546              |
| TRICHOPLAX   | -----RLQLINFWSNNNRLPSGTLERLSSV-LYALYSPNAESEF-----            | 2543              |
| NEMATOSTELLA | -----KLKLQNFWSDETRLPNNTTLERLVDV-LRAMYSTNTEQQY-----           | 2555              |
| PRIAPULA     | -----RMIVTNFWSHATRLPTQTLPRLLAI-AQTLYSPATEPHF-----            | 2592              |
| SOFTCORAL    | -----RLKLRNFWSDETRLPNSTLERLVQV-LRAMYSPITESEY-----            | 2566              |
| PISTILLATA   | -----QLKLRNFWSDEARLPGTTLERLVEV-LRALYSTTTEIQY-----            | 2593              |
| HEMICHOR     | -----RLRVSNFWSHETRLPVGTLDRMVSM-LECMYSPDAENQF-----            | 2591              |
| BELCHER      | -----RLLVQNFWSHETRLPTGTLERLVAM-LECMHSPRTEPQY-----            | 2590              |
| STRONG       | -----RLRVSNFWSHETRLPKETLERLISM-LGCMYSPGTENRY-----            | 2587              |
| STARFISH     | -----RLRVSNFWSHETRLPTGTLERLVAM-LECMYSPGTEHQY-----            | 2601              |
|              | :        :*                                                  | :        :        |

Supplementary Figure 9: Clustal Omega: DNA-PKcs alignment metazoan plus “putative archaeon”

|              |                                                              | <b>RYG70450.1</b> |
|--------------|--------------------------------------------------------------|-------------------|
| ARCHAEON     | GYIILLCKE-----LFDIKSVNNWLAYAPSLLL SVILQHPKNLEVLFNISLL        | 2855              |
| MUDCRAB      | -----LELAMYIILEATRYSDYQORDIFQHPLT                            | 2546              |
| SCORPION     | LYISLIVDNFWSNEKRLPLGTVERLIALMKNMLQYSTFLLEMESKSPDYNLKI FQNPLS | 2587              |
| SPONGE       | -----LYHATNLLL ELTSRSPDYNRVLFDTPLS                           | 2612              |
| CAPITELLA    | -----LSYATNLLL EMTTKSSDFN RVLFDTPLS                          | 2577              |
| DANIO        | -----LSLATDLLL EMTSHSPDFTRNMF EFP LS                         | 2592              |
| MILII        | -----LSIATNLLL EMTSRSPDY TREMF EY PLS                        | 2593              |
| BAMBOO       | -----LSIATNVLL EMTSHSPDYSREMF EY PLS                         | 2588              |
| XENOPUS      | -----LSLATNLLL EMTSKSPDYIRKMF EHP LS                         | 2604              |
| STERLET      | -----LSLATNLLL EMTSRSPDYTRDMF EY PLS                         | 2606              |
| GAR          | -----LSLATNLLL EMTSRSPDYSRAIF EY PLS                         | 2595              |
| LATIMERIA    | -----LSLATNMLL EMTSRSPDY TREIF EHP LS                        | 2594              |
| CAECIL       | -----LSLATNFLL EMTSKSPDY TREMF EHALS                         | 2596              |
| SNAKE        | -----LSLATNFLL EMTSKSPDYSRKM F EY PLS                        | 2592              |
| CANARY       | -----LSLITNFLL EMTSKSPDYSRKIF EHP LS                         | 2585              |
| OSTRICH      | -----LSLITNFLL EMTSKSPDYSRKM F EHP LS                        | 2555              |
| GECKO        | -----LSLVTNFLL EMTSKSPDYSRKM F EY PLS                        | 2594              |
| TURTLE       | -----LSLATNFLL EMTSKSPDYSRKM F EHP LS                        | 2594              |
| ALLIGATOR    | -----LSLATNFLL EMTSKSPDYSRKIF EHP LS                         | 2552              |
| PLATYPUS     | -----LSLVTNFLL EMTSKSPDYSRHIF EHP LS                         | 2586              |
| TASDEVIL     | -----LSLATNFLL EMTSKSPDYSRHIF EHP LS                         | 2588              |
| <b>HUMAN</b> | -----LSLATNFLL EMTSMSPDY PNP MF EHP LS                       | <b>2582</b>       |
| MOUSE        | -----LSLATNFLL EMTRMSPDY LNP IF EHP LS                       | 2578              |
| CRASSO2      | -----LSYATNLVLE MTSKSPDY QREMF ES PLE                        | 2574              |
| POMACEA      | -----LSYATNLLL EMTSKSPDY DRQ IF EHP LS                       | 2574              |
| TRICHOPLAX   | -----LSYSTNLLL ELTSRSPDY KLS IF DH PLS                       | 2571              |
| NEMATOSTELLA | -----LSYTTNLVLL HLT SFSPDFERLMF EQ PLS                       | 2583              |
| PRIAPULA     | -----LSYATYLLL QLTSLSPDY KELV FTQ PLS                        | 2620              |
| SOFTCORAL    | -----LSYTTNLLL HLT SQSPDFGRL IF EQ PLS                       | 2594              |
| PISTILLATA   | -----LSYTTNLILL HLTSLSPDYERLMF EQ PLS                        | 2621              |
| HEMICHOR     | -----LSYATSLLL EMTSKSPDY KREIF EHALS                         | 2619              |
| BELCHER      | -----LSYCTNLLL EMTSRSPDF SREIF QHP LS                        | 2618              |
| STRONG       | -----LGYATNLLL EMTSKSPDF KREIF EHP LS                        | 2615              |
| STARFISH     | -----LSYASSLLL EMTSKSPDY KREIF EHP LS                        | 2629              |
|              | * .:: . :*                                                   |                   |

Supplementary Figure 9: Clustal Omega: DNA-PKcs alignment metazoan plus "putative archaeon"

|              |                                                                    | <b>RYG70450.1</b> |
|--------------|--------------------------------------------------------------------|-------------------|
| ARCHAEON     | DNVTPTYQPLST-RSSRLTSSAGFSSSTPLFALERTSQSIQMLALQSPSIA-----K          | 2906              |
| MUDCRAB      | LCKFREMK-VSTAWRAR-----HASM-IPLFMDTOVSSDSSLRSLTQ-----SNEAEDDV       | 2594              |
| SCORPION     | TCAFQNYA-ISSSWKKR-----HATL-TPWVVDLSLSAASFSDTSV-----K               | 2627              |
| SPONGE       | ECRFEDYKEIDLSWQQR-----HLQM-TPLFAATQLSQTQSDTG-----S                 | 2651              |
| CAPITELLA    | ECKFQDFA-VSSTWYQR-----HAAM-TPMFLDTQSSQSNDSPD-----AG                | 2616              |
| DANIO        | ECKFQDYT-IDSNRMR-----STVL-TPMFMETQATQGAEAAGSQ-----AA               | 2633              |
| MILII        | ECKFQDYN-IDSSWQQR-----STIL-TPMFVETOATQNSRSRSQ-----EGSLTAQG         | 2640              |
| BAMBOO       | ECKFQDYS-IDSSWHQR-----SRIL-TPLFVETOASAGSIKRSSQ-----EASTVDQN        | 2635              |
| XENOPUS      | ECKFQDYT-VDSSWRFR-----SSVL-TPMFVETQLSQSMQRSRAQ-----GTIEADE         | 2650              |
| STERLET      | DCKFQDYI-IDSNRHR-----STVL-TPMFVETOVTQGGTQYHTQ-----D---SPQG         | 2650              |
| GAR          | ECKFHDIY-IDSSWHHR-----NTVL-TPMFVETOASQGGSRYSR-----GGSASAQG         | 2642              |
| LATIMERIA    | ECKFQDYI-IDSNRHR-----STVL-TPMFVETOASQSTARFRSQ-----EGPEQVQG         | 2641              |
| CAECIL       | ECKFQDYT-IDSNRWYH-----STVL-TPMFVETOASLSASRYRSQ-----EGSFPAQS        | 2643              |
| SNAKE        | ECKFQDFV-IDSNWRYR-----STIL-TPMFVETRASQSA-----ITQEG                 | 2630              |
| CANARY       | ECKFQDFV-VDSSWRFR-----STVL-TPMFVETOASPSTHRNLSC-----ERSLSPSG        | 2632              |
| ONSTRICH     | ECKFQDFV-IDSSWRYR-----STVL-TPLFVETOASQSTNRSLLC-----ERSPSTSG        | 2602              |
| GECKO        | ECKFQEFA-VDSSWRFR-----STVL-TPMFVETOASQNSPSRHRPP-----GGSLLTHG       | 2641              |
| TURTLE       | ECRFQDFT-IDSNWRYR-----STVL-TPMFVETOATQSAKRNRSC-----EGSLSTQG        | 2641              |
| ALLIGATOR    | ECRFQDFI-IDSNWRYR-----STIL-TPMFVETOASQASARKRSQ-----EGSLSTPG        | 2599              |
| PLATYPUS     | ECKFQEYT-IDSNWRFR-----STVL-TPMFVETOASQSALRSRSQ-----EGLLPQG         | 2633              |
| TASDEVIL     | DCKFQEYS-IDSDWRYR-----STVL-TPMFIETQASQNSTRNRSQ-----EGSLSLPR        | 2635              |
| <b>HUMAN</b> | <b>ECEFQEYT-IDSDWRFR-----STVL-TPMFVETOASQGTLOTRTQ-----EGSLSARW</b> | <b>2629</b>       |
| MOUSE        | ECEFQEYT-IDPDWRFR-----STVL-TPMFIETQASPSILHTQTV-----EGPLSDQR        | 2625              |
| CRASSO2      | DCKFQDYN-VKSSWKQR-----HAAM-TPLFANTMATQSMDDD-----E                  | 2612              |
| POMACEA      | ECTFRDYS-VQSSWRQR-----HAVM-TPLFAVTQGSQSETMEDVE-----D               | 2612              |
| TRICHOPLAX   | ECKFHDMY-VNYSWQYR-----HAMM-TPLFAATQLGSGQSMAS-----FSLSGSSS          | 2616              |
| NEMATOSTELLA | ECKFEEYP-IDYSWQQR-----HVVM-TPLFAATQGSTQSHSQ-----GGSL-              | 2623              |
| PRIAPULA     | DCKFQDYN-IATSWQSR-----HAAL-TPLFTETQASQASSTQQTIV-----AAA            | 2662              |
| SOFTCORAL    | ECKFQDYE-INFQWQQR-----NSTM-TPLFVSTLMPSSGSSQSS-----FGSHSMDI         | 2639              |
| PISTILLATA   | ECRFEEYQ-IDYSWQKR-----HLAM-TPLFAATQSGSHGSGMTPIT-----Q----ESMSV     | 2665              |
| HEMICHOR     | ECKFEDYQ-IDHSWKRR-----HAAISTPMFVETOQSTQIGSDSQ-----SFIE             | 2661              |
| BELCHER      | ECRFQDVQ-IDHSWKQR-----HVAM-TPMFVETOSSHYPASSQSQA-----QSLSQGGQD      | 2666              |
| STRONG       | ACKFEGVQ-IDHSWRQR-----HAAISTPKFVETOQVGSQSGSI-RGSPSSQSMSTSSGMSM     | 2668              |
| STARFISH     | ECRFQDVT-IDHSWKQR-----HLAISTPMFVETOSSQASSGSQSQSPPPDS-----S         | 2675              |
|              | :           :                   *   *                              |                   |

Supplementary Figure 9: Clustal Omega: DNA-PKcs alignment metazoan plus "putative archaeon"

|              |                                                                  | <b>RYG70450.1</b> |
|--------------|------------------------------------------------------------------|-------------------|
| ARCHAEON     | KFAGCLSQG-LQTSIFGTSYTGEDRNMKYVKGTQQISWTQNSTSFDKSTLNYSYHKFAEP     | 2965              |
| MUDCRAB      | DGPRGVAAT--QANVFSATQQ-----TGGTFNWVTESTFDTS-LADMEYAAT---          | 2638              |
| SCORPION     | NIDEQIRST-VDVREFDPTQD-----QASKKAFNWLQTQTS-IDT-LGDWGSS-----       | 2671              |
| SPONGE       | IGTGMLRATVQQSLAFTPTQ-----GQESSYNWMTPSAQ----SVDYSVPSF--T          | 2695              |
| CAPITELLA    | LSTGQLRAT-QDAAQFTQQA----D---GSSKGPYNWLTQSS-LDT-FSDSQNL----T      | 2662              |
| DANIO        | TVRGQIRAT-QTSLEFSQILA-----PGAGRRSAYNWLGTGSS-VDT-LADYSLS----S     | 2680              |
| MILII        | TIGGLVRGT-QTHYEFPTQON-----PDAR-NFNWLTGNS-LDT-FAEYSLP----S        | 2684              |
| BAMBOO       | TIGGQIRAT-LTHYEFPTQON-----SGAR-NFNWLTGSS-LDT-FAEYTLF----F        | 2679              |
| XENOPUS      | PIGGQLRAT-QQHYQFTPTQON-----IGGRSSFNWLTGSS-MDT-LADYSVE----S       | 2695              |
| STERLET      | TIGGQVRAT-QAQLFPTQQA-----AGRRSSFNWLTGSS-IDT-LSEYSLP----S         | 2695              |
| GAR          | SLGGQLRAT-QSTLEFPTQD-----PGRRASFNWLTGSS-VDT-LSEYALP----A         | 2687              |
| LATIMERIA    | SLGGQVRAT-QVQFDFTPTQON-----TGIRSSFNWLTGSS-VDT-FAEYSLP----S       | 2686              |
| CAECIL       | SLGGQVRAT-QQOYEFPTQON-----IGGRNSFNWLTGNS-IDT-LAEYGVP----S        | 2688              |
| SNAKE        | YLGGLRAT-QQOFEFTPTQON-----ISGRSSFNWLTGNS-VDT-FTNSTVP----S        | 2675              |
| CANARY       | SVRGQVRAT-QRQYEFPTQH-----GSGRSSFNWLTGSS-IDT-LAEYAVP----S         | 2677              |
| ONSTRICH     | SGGGRVRVT-QQOYEFPTQON-----ISGRSSFNWLTGNS-IDT-LAEYMVP----S        | 2647              |
| GECKO        | SMGGQLRAT-QQOYEFPTQOT-----IGGRSSFNWLTGNS-VDT-FAEYSVT----S        | 2686              |
| TURTLE       | SLGGQVRAT-QQOYEFPTQON-----VNGRSSFNWLTGSS-IDT-LAEYTVP----S        | 2686              |
| ALLIGATOR    | SQGAQVRAT-QQOYEFPTQON-----MSGRKSFNWLTGSS-IDT-LTEYTVP----S        | 2644              |
| PLATYPUS     | LLLGQLRAT-QQOYEFPTQON-----TDGRNSFNWLTGSS-VDT-FTDYPGP----T        | 2677              |
| TASDEVIL     | LLTKQIRAT-QQOYEFPTQON-----IAGRNSFNWLTGSS-IDT-LADYTIP----S        | 2680              |
| <b>HUMAN</b> | <b>PVAGQIRAT-QQOHDFTLQOT-----ADGRSSFNWLTGSS-TDP-LVDHTSP----S</b> | <b>2674</b>       |
| MOUSE        | QKPGQVRAT-QQOYDFPTQA-----SVERSSFNWLTGSS-IDL-LADHTVF----S         | 2670              |
| CRASSO2      | SYSGEIRAT-QDAQQFTALD-----ASKAPFNWLTGSS-LDT-FTDYSTV----           | 2655              |
| POMACEA      | SLRGGVRAT-VDVEQFTAME-----TGSNAPFNWLTQSS-LDT-FADASLM----          | 2656              |
| TRICHOPLAX   | TDEHLRATQSTNLQFTPTQD-----TDARNWLDPSSVDKS-IQSYAAFLOQSL            | 2664              |
| NEMATOSTELLA | -EPGALRAT-QLRVEFSPTMD-----QSLSQAFDWLNPSSQADS-VQSFTV-----         | 2666              |
| PRIAPULA     | MQTGEIRAT-QVVPEFTATQ-----DVAGGRSTYNWLTQSSIDT-FADQSL----S         | 2709              |
| SOFTCORAL    | TDGGQLRAT-QNP-QFSMTQT---AGATGPTAQTYDWLNPSS-LDT-SQSS-SA----S      | 2686              |
| PISTILLATA   | DGSPGLRAT-QNL-QFTPTQD-----QRRSTAFDWLNPSTQ-ESN-LQPSQSF----A       | 2709              |
| HEMICHOR     | TIGNQVRAT-QDV-QFSATQ-----EVDGKKTAYNWLGT-S-QDT-FSEF-SS----S       | 2704              |
| BELCHER      | TLGGQLRAT-QDVLQFTATQ-----ASAAPKNAYNWLQTQSS-LDT-FADY-SV----P      | 2711              |
| STRONG       | GGGQLRAT-QATQNFATQ-----DNAASSHKNGYNWLGT-S-QDT-FADY-SS----S       | 2714              |
| STARFISH     | LSRGEIRAT-QDAHQFIATQQ----LDAVASRKNAYNWLGT-S-QDT-FADY-ST----S     | 2722              |

: \* :

Supplementary Figure 9: Clustal Omega: DNA-PKcs alignment metazoan plus "putative archaeon"

|              |                                                                  | <b>RYG70450.1</b> |
|--------------|------------------------------------------------------------------|-------------------|
| ARCHAEON     | T-----GTTKLVSGAASSVA-----PLS---SFPFQTTVGGGISQP--GT--FS-MG        | 3006              |
| MUDCRAB      | HAPIHGSASGPMFNVGAHGKKNMRY-----KSSIGNTCMQPA-----ET                | 2679              |
| SCORPION     | -----STSSLLFTIGSDTKKIP-----NIDENNRNSN-----QDTSK                  | 2704              |
| SPONGE       | VGATPTS DSSLLFTRPTMRPPLK-----NPLR-----ISAERLGKV--GE---SEG-       | 2736              |
| CAPITELLA    | LATQ--SESSL MFTV GSSRIKS-----SKKTPGSEFGQKVRSD-----VR             | 2701              |
| DANIO        | ---DS--LSSLLVFDKRSERPQ-----AAWRAVGAGFGSKRLTAT--SD--DTDSR         | 2723              |
| MILII        | LASEP-GSSLLVFSRWSERLH----R----PAKKPVGPDFGKKRLALP--GD--EVDSK      | 2731              |
| BAMBOO       | S--ES-ASSLLVYSKRSESRQ----K----P-MKPVGPDFGQKRLAIP--GD--EVDAK      | 2723              |
| XENOPUS      | --PES-LPSALLFVNKR NENVR----R----VPLKPLGPNF GMRRLGLP--GD--VTDSK   | 2740              |
| STERLET      | S-ADS-VSSLLVFGKRGDKSQ----Q----AARKPVGSDFGKKRLGLP--GD--EVDSR      | 2741              |
| GAR          | T-SDS-LSSLLVFGKWGEKQO----QQQQRGPKKPVGADFGKKRLALP--GD--EVDSR      | 2737              |
| LATIMERIA    | S-SES-LASSLLAYGKRSEKSQ----R----AAMKPVGPDFGKRRALP--GD--EVDSR      | 2732              |
| CAECIL       | S-SES-LSSLLFASKKSEKSR----R----TSLKPLGPNF GKKRLGLP--GD--EVDSK     | 2734              |
| SNAKE        | S-SES-V--SMLLIKRTDRSY----K----TAFKPLSPNF GKKRQGLP--GD--EVDNK     | 2719              |
| CANARY       | S-SES-LSSMLLVSKRSEKFK----Q----ATFKPVGPDFGKKRLGLP--GD--EVDSK      | 2723              |
| ONSTRICH     | F-SES-LSSMLLVSKRSEKFK----Q----SAFKPVGPDFGKKRLGLP--GD--EVDSK      | 2693              |
| GECKO        | S-SES-LSSMLLTHKHADRSQ----R----AAFKPLGPNF GEKRLGLP--GD--EVDSK     | 2732              |
| TURTLE       | S-SES-LSSMLFVSKRSEKSQ----R----ATLKPLGPNF GKKRLGLP--GD--EVDSK     | 2732              |
| ALLIGATOR    | S-SES-LSSMLFVNKRSEKSQ----R----GTLKPVGPNF GKKKLGLP--GD--EVDST     | 2690              |
| PLATYPUS     | S-SES-LS-TLLFTHKKSSRTQ----K----AGFKPLGPNF GKKRVGLP--GD--EVDSK    | 2722              |
| TASDEVIL     | L-SES-LSSLLFVHKRTDKPQ----R----AAWKSVPNF GKKRLGLP--GD--EVDNK      | 2726              |
| <b>HUMAN</b> | <b>-----SDSLLFAHKRSERLQ----R----APLKSVPDFGKKRLGLP--GD--EVDNK</b> | <b>2715</b>       |
| MOUSE        | --SET-LSSLLF SHKRTEKSQ----R----MSCKSVGPDFGTTKRLGLP--DD--EVDNQ    | 2715              |
| CRASSO2      | ---GSETSSLLFTVGTQDMALRTGLK-----PKRKPGPGFGRPR-----AGASSKPAE-      | 2701              |
| POMACEA      | ---ETNSLSSLLFTV GSSSKGADSKTRVATRRHHTGTGSNFGKQ MARTERTGNSAGPK--   | 2711              |
| TRICHOPLAX   | SSTSSETSTLLFLSSKSPRQR-----PLQ--MKPLSKDFGQQKLSSETA-S--QPQS-       | 2712              |
| NEMATOSTELLA | --GSSEAQSLLF--GTKPRAS-----QRS--LKPVP HDFGSRRLAPTQS-D--SQA-       | 2710              |
| PRIAPULA     | VSSISSSSSSPYSSPSAD-HH-----ETPTEAK----RR--GATGE--EPRE-            | 2748              |
| SOFTCORAL    | FSVGS-QPSSLLFKSNPNMRRF-----KT---LRPQSEQPST-----SSAAQ--SDDP-      | 2728              |
| PISTILLATA   | MASTQ-TQSLLLFSTSQSHKRR-----KM---LKPVP GDFG SQKLSQASSR--ISSH-     | 2756              |
| HEMICHOR     | TGTET-SQSLLFTIGTTKKKA-----IT---RKPVSSGFGKDKMGAG--KD--QTDS-       | 2749              |
| BELCHER      | LGTE--TQSLLFTTDASKKVAKARR-----LKPVGPGFGSDRLSAG--RD--QTDG-        | 2757              |
| STRONG       | SS-A--SESSLFTMGS LPKRTAQGFRGVK-----QDAGAGSRD-----KEA-            | 2754              |
| STARFISH     | SA-S--DQSLLFTLGASKKM-GRGRQVVS---KTATDAGFGKEKLQSDQPRG--RDEV-      | 2772              |

Supplementary Figure 9: Clustal Omega: DNA-PKcs alignment metazoan plus "putative archaeon"

|              |                                                                            | <b>RYG70450.1</b> |
|--------------|----------------------------------------------------------------------------|-------------------|
| ARCHAEON     | PPTSLSPRYMTTQRL <b>LPV</b> RFSAHSMQQAQSSIINKM-IYRRMTAEAAQNKHMSDVYNVDLH     | 3065              |
| MUDCRAB      | STTTDSGNIQSKL <b>LRKR</b> RFYKDQDREKQTIFFAKQEERRNKMRAATLEMERKLRREAQVTMY    | 2739              |
| SCORPION     | NKIEKLSSSNTFHL <b>RRR</b> RFLKDREK--SRLHFFIRMEMRKQQLRQEREKEQKKQREGQVTIY    | 2762              |
| SPONGE       | GETKEEKRKQVLQ <b>LKKR</b> ALKDKEM--VSSFFAMNEARKKMRREELKKQRRARQSYVVMY       | 2794              |
| CAPITELLA    | VSAMDEANKEIMRL <b>LKR</b> RFIHDQES--TARFFMKNVRMCKMREDIQREQMKREHQTMY        | 2759              |
| DANIO        | TAAERERRADILR <b>RRR</b> RFLKDKEK--ESIKFAKKEIHSQRTERRADLKIRQDAQVTLY        | 2781              |
| MILII        | TKGIVDQRADILR <b>RRR</b> RFLKDREK--VSLIFAKRGIREQRAEQKIKTEKRMERDAKVTLY      | 2789              |
| BAMBOO       | TKAVADQRADILR <b>RRR</b> RFLKDRQK--ENLIFARKSIOEKHLAKEMKTEQLKKRDAQVTLY      | 2781              |
| XENOPUS      | TK-SMEDRSDILR <b>RRR</b> RFLKDREK--LSLIYARKGTAEQKREKAIKIEQKMKQDAQITLY      | 2797              |
| STERLET      | TK-VKDQRADILR <b>RRR</b> RFLKDQEK--VSLIYAKKGVREQKQAKENVAEQKLRKREAQVTLY     | 2798              |
| GAR          | KKAVNDQRADILR <b>RRR</b> RFLKDQEK--VSLQFARKGIIQAQRQEKERAAEQTLRREAQVTLY     | 2795              |
| LATIMERIA    | TK-VADQRDLR <b>RRR</b> RFLKDQEK--VSLIYARKGVQIQKEEQKMAELKMKQDAQVTLY         | 2789              |
| CAECIL       | AK-GIDDRSDILR <b>RRR</b> RFLKDQGG--ISKIFVRKGVAEQKREKEITAERKMKRDSEVTLY      | 2791              |
| SNAKE        | SK-DTDEHTEILR <b>RRR</b> RFLKDKEK--LSLIYARKGVAEQKQEKIKTQLKIKHDAQITLY       | 2776              |
| CANARY       | TK-GIEERAEILR <b>RRR</b> RFLKDQDK--LSLIYARKSLAEQKREKEIKSELKMKYDAQVTLY      | 2780              |
| OSTRICH      | IK-GIDERAIEIL <b>LKR</b> RFLKDQEK--LSLIYARKGVAEQKREKEMKSELKMKHGDQVILY      | 2750              |
| GECKO        | TK-GIDERAIEILR <b>RRR</b> RFLKDQEK--LSLIYARKGVAEQKREKELKTELKMKHDAQVTLY     | 2789              |
| TURTLE       | AK-GIDERAIEILR <b>RRR</b> RFLKDQEK--LSLIYARKGVAEQKREKEIKSELKMKHDAQVTLY     | 2789              |
| ALLIGATOR    | TK-DINERAIEILR <b>RRR</b> RFLKDQEK--LSVIYARKGVAEQKREKEIKTELTMKRDAQVTLY     | 2747              |
| PLATYPUS     | TK-GIEERTEILR <b>RRR</b> RFLKDQEK--LSLIFAKKGVVEQKREKEIKSELKMKHDAQITLY      | 2779              |
| TASDEVIL     | TK-GIDERAIEILR <b>RRR</b> RFLKDQEK--LSLIYARKGVVEQKREKEMKNEKMKHDAQVTLY      | 2783              |
| <b>HUMAN</b> | <b>VK-GAAGRTDLLR<b>RRR</b>RFMRDQEK--LSLMYARKGVAEQKREKEIKSELKMKQDAQVVLY</b> | <b>2772</b>       |
| MOUSE        | VKSGTPSQADILR <b>RRR</b> RFLKDREK--LSLLYAKRGLMEQKLEKDIKSEFKMKQDAQVVLY      | 2773              |
| CRASSO2      | RSRNEDQDSEMYR <b>LKR</b> RFLRDEEQ--TKTYFIKRHTRLEKMRREALREQKSRRREHQTMY      | 2759              |
| POMACEA      | NDNNTPEEDNVW <b>LKR</b> RFLKDRST--ASKYFARREIKEKSKREERLKQQLRRENQVTLY        | 2769              |
| TRICHOPLAX   | -QSVSQPSSSLNH <b>LRRR</b> YIKSEMA--NNAFYAKRERRKKQLREEILKQOKIARENKVVMY      | 2769              |
| NEMATOSTELLA | TPAMGSQQQEILR <b>LKR</b> RFTKDSQT-KDRQYFIRMHEKKRQMLQQTQSRLKAARESQVVMY      | 2769              |
| PRIAPULA     | EASAAGGGDDVMR <b>LRRR</b> RFLKDQEQ--TRVFFARREARRKQRREEAETLSRQRREGQVXMY     | 2806              |
| SOFTCORAL    | SNENSSQLQNIR <b>LKR</b> RFLVVDREK--TDVYFAKKEIARQKLRTEVQRQKVARENKVVMY       | 2786              |
| PISTILLATA   | QSQDPNEKKEIL <b>LKR</b> RFLKDQSQ--ISAFFAKQALKRNKFRQALQRQKAAREGAIVVMY       | 2814              |
| HEMICHOR     | TEDTSQTDREIMR <b>LKR</b> RFLKDQEA--SRAFFARREIRLKKMREEAQKEQKLRHNMVTLY       | 2807              |
| BELCHER      | RAAEDSQQSEIMR <b>LKR</b> RFLKDQDV--TKAYHARRQIRMQKMRREERVKEQRAKRGNLVTLY     | 2815              |
| STRONG       | RKAPSEGEKEVQR <b>LKR</b> RFMKDQSS--QSFAKRAATRQKELREEVQKSQRERRFAQVTMY       | 2812              |
| STARFISH     | DAKQSGEDKKINR <b>LKR</b> RFLKDHSS--SQAYFARREMKRQQLKEKILEEQREKRFSTVTMY      | 2830              |

\* \*

: ::

Supplementary Figure 9: Clustal Omega: DNA-PKcs alignment metazoan plus "putative archaeon"

|              |                                                                         | <b>RYG70450.1</b> |
|--------------|-------------------------------------------------------------------------|-------------------|
| ARCHAEON     | AEYRVGEAPDIAISAANLIKPLQTLCLYNPAASSQLLCLLLVSQYRSVDLVKEGIELIDC            | 3125              |
| MUDCRAB      | RQYRVGELPDIQIPHRALIAPLQALSQRDNKVAQLLFDVVVQAVVDNADSLMTRGEKDTW            | 2799              |
| SCORPION     | RQYRIGDLPDIEINYSSIIIVPLQALAQHDDDEICRMLFQSLILSVCCYMKSNQ-VTEYSEF          | 2821              |
| SPONGE       | RKYRMGELPDIQIKHSELI RPLQALAQNDISGLARLLFCSLFNSIFSQLDHLLTEEDAAAT          | 2854              |
| CAPITELLA    | RQYRTGDFPDIQIKYSFLIAPLQALAQRDSTIAKLLFVAVFQAI FTQIESEKTERESQSL           | 2819              |
| DANIO        | RSYRVGDL PDIQIQFSSLIAPLQALAQRDATLAKQLFSSLFAGVLVEMERLKS NKETADI          | 2841              |
| MILII        | RSYRFGDL PDIQIKYSSLIAPLQALAQKDHS LAKQLFSSALFSGILEEVHKS KTA-ETKDI        | 2848              |
| BAMBOO       | RCYRVGDL PDIQIKFSSLIAPLQAVAQKDHS LAKQLFSSALFSGILEEVRKSKTAAEMSGI         | 2841              |
| XENOPUS      | RNYRQGEL PDIQIISYSNLIAPLQALAQRDPTMAKLLFSSLFSGILTDTAS-----DISV           | 2851              |
| STERLET      | RSYRQGDLPDIQIQHSSLIAPLQALAQRDPTLAKQLFSSLFSGILIEMEKSKSQSEKKRI            | 2858              |
| GAR          | RRYRHGDL PDIQIIPYSSLI VPLQALAQRDSTLAKQLLSTLFCGILAQMEGSKNEAEKRRI         | 2855              |
| LATIMERIA    | RRYRQGDLPDIQIHYS SLIAPLQALAQRDPTLAKQLF SNLFTGILTEMEKSRSDSERKTI          | 2849              |
| CAECIL       | RSYRHGDL PDIQIAYS NLIAPLQAVAQRDPTLAKQLFSS LFFGIMKEMDKLKSSEM KDI         | 2851              |
| SNAKE        | RKYRQGDLPDIQIEYSSLI TPLQAVAQKDPTLAKQLFSS LFSGILEQMKKSKPLAERNNI          | 2836              |
| CANARY       | RSYRVGDL PDIQIEYCSLIAPLQGLAQKDPTFAKQLFSS LFGIFHEVKKSKHPSEKNAI           | 2840              |
| OSTRICH      | RSYRVGDL PDIQIEYSSLIAPLQGLAQKDPTFAKQLFSS LFTGILREVEKSKTPSEKKII          | 2810              |
| GECKO        | RRYRQGDLPDIQIEYSSLI TPLQGLAQRDSTLAKVLFSS LFAGILEEMRKSQSEKNSI            | 2849              |
| TURTLE       | RSYRQGDLPDIQIEYSSLI TPLQGV AQRDPLAKQLFSS LFTGILKEMNKFKNPSEKNCI          | 2849              |
| ALLIGATOR    | RSYRQGDLPDIQIEYSSLI TPLQGV AQRDPTLAKQLFSS LFTGILKEMENSKSPLEKTHI         | 2807              |
| PLATYPUS     | RSYRQGDLPDIQIEHSSLI TPLQAVAQRDPTLAKQLFSS LFAGILKEIDKFKSQSEKRNI          | 2839              |
| TASDEVIL     | RSYRQGDLPDIQIEYSSLI NPLQAVAQRD PVLAKQLFGSLFAGILKEMDKFKSPSEK KSI         | 2843              |
| <b>HUMAN</b> | <b>RSYRHGDL PDIQIKHSSLI TPLQAVAQRDPI IAKQLFSS LFSGILKEMDKFKTLSEKNNI</b> | <b>2832</b>       |
| MOUSE        | RSYRHGDL PDIQIQHSGLI TPLQAVAQKDPI IAKQLFSS LFSGILKEMNKFKTTSEKNII        | 2833              |
| CRASSO2      | RKYRKGDL PDIQIKYSYIIAPLQAV AHRDSSVAKLLFGAIFKGIFSKMDEVKTEREVQET          | 2819              |
| POMACEA      | RRYRIGDLPDIQIKYSYIIAPLQAL AHRDNTIAKLLFGAVFKAIYQEMDKVKTDQEMEET           | 2829              |
| TRICHOPLAX   | RKYRDGEL PDIQIKHSELIAPFQAL AQVCYLDQNYRY---VNLSVNDLVENFNDEDAEET          | 2826              |
| NEMATOSTELLA | RRYRAGDL PDVQIKHSELIAPLQAVA QCDSTLAKQLFSSLVQAILSQMDEKLTEQDAEKT          | 2829              |
| PRIAPULA     | RKYRIGDX PDVQIQFCHLISPLOAL AQRDARVAQLLFS SLCDGVRRAGDTATERDVDAT          | 2866              |
| SOFTCORAL    | RKYREGDL PDIQIKHSDLI TPLQALAQCD SYIAKQLFSGIFRGIFSQIDENVTD TQADEI        | 2846              |
| PISTILLATA   | RKYRS GDL PDIQIKYSELIAPLQAL AQCDNTFAKQLFSSALFRGIFSKIDEKLP EREAASV       | 2874              |
| HEMICHOR     | RSYRQGDLPDIQIKHMYLIAPLQAL AQRD TAIARQLFSS LFCGVFAQIAEEKTERESEEI         | 2867              |
| BELCHER      | RQYRVGDL PDIQIKYSYIIAPLQAL AQRD SMLARLLFSS LFRGIFEEIENVKTEREAEDL        | 2875              |
| STRONG       | RQYRTGDL PDIQIKHSDI IAPLQALALR DSTLSRLLFS S LFRGILARIGDMCTDGETELH       | 2872              |
| STARFISH     | RRYRTGDL PDIQIKYS DLIAPLQAL AQRDAS LARLLFSS LFRGIFSEIEEVKTEREAEST       | 2890              |

\*\* \*: \*\*: \*        :\* \*: \* :.

Supplementary Figure 9: Clustal Omega: DNA-PKcs alignment metazoan plus "putative archaeon"

|              |                                                                     | <b>RYG70450.1</b> |
|--------------|---------------------------------------------------------------------|-------------------|
| ARCHAEON     | LCDILKQCQSC-SPTCILIPTILQVFIELSSCQPEFVKVLHAKLPDATVCQIALSCGCFH        | 3184              |
| MUDCRAB      | IQQLHSSVNVIANSYMCHPDMRLRTVLHLVINND--IL-----VSPDALAAACLGGHLEA        | 2852              |
| SCORPION     | CRSLSSALNEILKKSVDHYHPQLVAFCECLNCDVKEMD-----IDYEQICTASQASHKQS        | 2876              |
| SPONGE       | KGVIEGNINTILDCSTQYYPFFIGSLQDICYEN-SLK-----IKPPSITTSLSASKQEF         | 2908              |
| CAPITELLA    | VAKIESSLNKILETSTQYFSPFIGCVLEIAYLFPKQLK-----LQPGVVSTVCNMSDQQP        | 2874              |
| DANIO        | LKELVQTLNAFLNKSTVYFPPFISCIQDMSYHHKALLG-----VEPSLVSATCLASLQQP        | 2896              |
| MILII        | SKQLVENFNLYLLKATTLNFPPFVACIQDMSCKHDKLLG-----LDSTSVRSTSLASLQQP       | 2903              |
| BAMBOO       | GKELLLKHFTFLLNTTTLCFPPFVTCIQDMSCKHPDLLN-----LDPSIVSSTALVSLQQP       | 2896              |
| XENOPUS      | TDKLLKQFNFLSNLSYFPPFIACVQDMSYQHDELLH-----LNPANISTSCLASLQQP          | 2906              |
| STERLET      | TEEILGDMNFFLSKTTVYFPPFVTCVQDMSYRHKELLN-----IEPSSVSSSCLASLQQP        | 2913              |
| GAR          | TEELLQDMNHFLNKSTLYFPPFVTCVQDMSYQYKELLK-----VDPSAVSSSCLASLQQP        | 2910              |
| LATIMERIA    | LLELLGNFNGFLSNSTVYFPPFVTCIQDMSYQHAELLN-----LDPASVSASCLASLQQP        | 2904              |
| CAECIL       | TQKLLADFNRFLNITTSYFPPFVACIQDMSYHHTELLN-----LDPSNVSTSCLASLQQP        | 2906              |
| SNAKE        | IQQLLHDFNHFLTTSVLYFPPFIACILEMPTYLHEELLN-----LNCYSVSTSCLASLQQP       | 2891              |
| CANARY       | VQKLLNDFNFLSMLSIFPPFIACIQEMSYPHRELLN-----LDSANVSTSCLASLQQP          | 2895              |
| ONSTRICH     | IQQLLKDFNFSLSMSYFPPFIACIQEMSYPHRELLN-----LDSANVSTSCLASLQQP          | 2865              |
| GECKO        | IQQLVQDFNCFLLTTSVLYFPPFIACVQEMSYPHRELLN-----LNPSSVSTSCLASLQQS       | 2904              |
| TURTLE       | TQELLQNFNRFLSMTVSIFPPFIACIQEMSYPHRELLN-----LDSATVSTSCLASLQQP        | 2904              |
| ALLIGATOR    | VQKLLQNFDFLSISVSIFPPFISCIQEMSYPHRELLN-----IDSTSVSTSCLASLQQP         | 2862              |
| PLATYPUS     | TLKLLQDFNHFLSSTVSIFPPFISCIQEMSYPHRELLN-----LDANCVSTSCLASLQQP        | 2894              |
| TASDEVIL     | TEKLLDFNYFLSSTMLFFPPFISCIQEMSYPHRELLN-----LDSTTVSTSCLVSLQQP         | 2898              |
| <b>HUMAN</b> | <b>TQKLLQDFNRFLNITFSIFPPFVSCIQDISCQHAALLS-----LDPAAVSAGCLASLQQP</b> | <b>2887</b>       |
| MOUSE        | TQNLLQDFNRFLNITFLFFPPFVSCIQDISCQHPDFLT-----LDPASVRVGCLASLQQP        | 2888              |
| CRASSO2      | IQQIQKSIGVVLTTSIQYFTPFIISCLLDVLYSLRSLK-----VDVSDVSSAAMFGNIQP        | 2874              |
| POMACEA      | KEKISDSLGRMLSTSIHYFTPFMGCVMDILHTLRSSLK-----VEVSELSIAAKISNLQP        | 2884              |
| TRICHOPLAX   | KAEIKASLSNIVKKSKEYFPPFIACVQDICYQOK-ELS-----IQSSFASVASLASSQQP        | 2880              |
| NEMATOSTELLA | VTDIQGALDNIMTSTQFYFPPFISCIQEDICYHKS-MLK-----VQPSSVSTASLASLQQP       | 2883              |
| PRIAPULA     | MEKLLSEAVSVMASSTSYFSPFIGCLLDVCYRNISILR-----LDPAVVTTVSQTSMQQN        | 2921              |
| SOFTCORAL    | FRDIQDALNNMITSSTQYFPPFISCIQNVNCYNEG-KLS-----LEAGKVTTASIGSLQQP       | 2900              |
| PISTILLATA   | TSDLRSAMNHMLSSSTQFFPPFISSIQDICFHECKLRS-----VDSASVSTACLTSLQQP        | 2929              |
| HEMICHOR     | IKNINEHLNMLSNSTQYFSPFIGIEDIAYHNCKELM-----LDAQGISTASLISQQQP          | 2922              |
| BELCHER      | TEQISRFLNTALSNSKEYFPPFISSLQEICYREPRKLS-----PDASVIQQTGVISLQQP        | 2930              |
| STRONG       | VKGIERHLNQMLTDSNQFDPAFISCMLEIGFYHSEQLT-----LDPAAISQSCLTSRQLL        | 2927              |
| STARFISH     | KVEINRHLNMTLSTSTQYFPPFISCVQEISYYHSEQLT-----LVPSTISTASLTSQQMH        | 2945              |
|              | : : : .                                                             |                   |

Supplementary Figure 9: Clustal Omega: DNA-PKcs alignment metazoan plus "putative archaeon"

|              |                                                              | <b>RYG70450.1</b> |
|--------------|--------------------------------------------------------------|-------------------|
| ARCHAEON     | IGIRYLEAKLNIIKNSTFAAGKALSAVSQDTAKSTGHSAKRRKGASSSAGIGNRSDTIDE | 3244              |
| MUDCRAB      | LGVLVLERQVLLSQKG-----LGRDLPPPQKKLKT-----                     | 2882              |
| SCORPION     | LGILLEDHILICYN-----NFKSSNPAKRIKL---N-----                    | 2904              |
| SPONGE       | TGIMLLEKQLLLNV-----DS--SKSAKRSRT-----                        | 2933              |
| CAPITELLA    | LGILLEEGLLHSP-----ED-QSPASKRSRR---DR-----                    | 2902              |
| DANIO        | MGILLEESLLHGA-----GASEEPPLKRARG---KR-----                    | 2925              |
| MILII        | MGILLEKSLIHST-----TN-EEPPTKKARG---RQ-----                    | 2931              |
| BAMBOO       | MGIMLLESLMHL-----LP-EEPPAKRSRG---RT-----                     | 2924              |
| XENOPUS      | LGILLEKGLLHMK-----VP-DEPPAKKMRKEKEKA-----                    | 2937              |
| STERLET      | MGILMEESLIKGL-----VP-EEPPAKRARG---RR-----                    | 2941              |
| GAR          | MGILLEESLIRGS-----VP-DEPPSKRARG---HR-----                    | 2938              |
| LATIMERIA    | MGVLLLEQGLIQLL-----AA-EEPPAKRARG---RK-----                   | 2932              |
| CAECIL       | VGILLERSLMSLV-----DT-EEPPRKKMRG---KT-----                    | 2934              |
| SNAKE        | MGILLEQALVHLF-----PVEQQPPSKMRG---KT-----                     | 2920              |
| CANARY       | MGILLERALMALS-----PA-EEPPSKMRG---RT-----                     | 2923              |
| OSTRICH      | VGILLEHALISLS-----PA-EEPPSKRVCG---RA-----                    | 2893              |
| GECKO        | VGILLEQALVHLS-----SEEEPPAKMRG---KT-----                      | 2933              |
| TURTLE       | VGILLEQALTRLS-----SE-EEPLSKMRG---RA-----                     | 2932              |
| ALLIGATOR    | VGILLEQALIHLS-----TI-EEPPAKRMCG---RT-----                    | 2890              |
| PLATYPUS     | VGILLEQALIRLG-----PP-EEPSSKKRRG---KP-----                    | 2922              |
| TASDEVIL     | VGILLEKALIHILT-----PA-EEPPSKMRG---KP-----                    | 2926              |
| <b>HUMAN</b> | <b>VGIRLLEALLRLL-----PA--ELPAKRVRG---KA-----</b>             | <b>2914</b>       |
| MOUSE        | GGIRLLEALLRLM-----PK--EPPTKRVRG---KT-----                    | 2915              |
| CRASSO2      | LGICVLEQLISQD-----E--DERPSKGRS---D-----                      | 2900              |
| POMACEA      | LGIEVIEERLITED-----SG-GARPSKRSRY---D-----                    | 2911              |
| TRICHOPLAX   | IGILLEKQIMHLD-----T--EEPPSKRIKT-----                         | 2905              |
| NEMATOSTELLA | MGILLEKQLLSQE-----A--EPKSHKRMRT---E-----                     | 2909              |
| PRIAPULA     | LGIVLLEKMLMQGA-----CDDESRPAKRMRA---GS-----                   | 2950              |
| SOFTCORAL    | TGIMLLEKQILQMA-----EDPGERPRKQKT---G-----                     | 2928              |
| PISTILLATA   | IGIMLLEKQLEIE-----GK-SQNSRKRAKT---S-----                     | 2956              |
| HEMICHOR     | LGILLLEEYLVQKS-----GE-EERSRKPRG---S-----                     | 2949              |
| BELCHER      | IGIVLLEEQLVQKA-----GV-EEPRSKRART---S-----                    | 2957              |
| STRONG       | IGIRVLEEVLIKKS-----GD-DERSRKART---S-----                     | 2954              |
| STARFISH     | IGIRLLEENLIQKP-----WQ-EEKSAKRARF---V-----                    | 2972              |
|              | *: * :                                                       | *:                |

Supplementary Figure 9: Clustal Omega: DNA-PKcs alignment metazoan plus "putative archaeon"

|              |                                                                                                                                | <b>RYG70450.1</b> |
|--------------|--------------------------------------------------------------------------------------------------------------------------------|-------------------|
| ARCHAEON     | LFAQIETSTGDPAAAKNTVVTFDDVDSSSI <b>FIQLMHL</b> YDRLSEENIVNTLAEAVFLNDRS                                                          | 3304              |
| MUDCRAB      | -----HLNSQLDTST <b>WINMAEL</b> YKNLSMWDVVRG <b>IIH</b> SKL----G                                                                | 2918              |
| SCORPION     | -----KPLISDELS <b>W</b> L <b>KMAE</b> I <b>YK</b> SLSDYDS <b>VHG</b> IFSN <b>S</b> L----N                                      | 2940              |
| SPONGE       | -----NKSNEVTET <b>WIELAR</b> LYKS <b>L</b> EDYD <b>V</b> LHG <b>I</b> FTN <b>L</b> D----D                                      | 2968              |
| CAPITELLA    | -----SSRITQDTE <b>WLELAK</b> LYKS <b>I</b> SDYD <b>V</b> LRG <b>I</b> FSS <b>Q</b> I----G                                      | 2938              |
| DANIO        | -----ELPPDT--ER <b>WIHLAK</b> LYRS <b>L</b> GDYD <b>V</b> VRG <b>I</b> FSG <b>K</b> I----G                                     | 2959              |
| MILII        | -----ELPPD <b>T</b> DVAR <b>WIELAT</b> LYRS <b>L</b> GDYD <b>V</b> LRG <b>I</b> FSE <b>K</b> I----G                            | 2967              |
| BAMBOO       | -----QLPPDT--AR <b>WVELAK</b> LYRS <b>L</b> GDYD <b>V</b> LRG <b>I</b> FSE <b>K</b> I----G                                     | 2958              |
| XENOPUS      | -----EIP <b>P</b> DI--VR <b>WIELAK</b> LYRS <b>I</b> GDYD <b>V</b> LRG <b>I</b> FSG <b>K</b> I----G                            | 2971              |
| STERLET      | -----ELPPDT--AR <b>WIHLAK</b> LYRS <b>L</b> GDYD <b>V</b> LRG <b>I</b> FSG <b>K</b> I----G                                     | 2975              |
| GAR          | -----ELPPDT--ER <b>WIHLAK</b> LYRS <b>L</b> GDYD <b>V</b> LRG <b>I</b> FSG <b>K</b> I----G                                     | 2972              |
| LATIMERIA    | -----ELPPDT--IR <b>WLELAK</b> LYRS <b>L</b> GDYD <b>V</b> LRG <b>I</b> FSG <b>M</b> I----G                                     | 2966              |
| CAECIL       | -----ELSPDV--VR <b>WIELAK</b> LYRS <b>L</b> GDYD <b>V</b> LRG <b>I</b> FSG <b>K</b> I----G                                     | 2968              |
| SNAKE        | -----ELSPDV--TR <b>WIELAR</b> LYRS <b>V</b> GDYD <b>V</b> LRG <b>I</b> FSG <b>K</b> I----G                                     | 2954              |
| CANARY       | -----ELPPDV--IR <b>WIELAK</b> LYRS <b>L</b> GDYD <b>AL</b> RG <b>I</b> FSG <b>K</b> I----G                                     | 2957              |
| OSTRICH      | -----ELPPDV--IR <b>WIELAK</b> LYRS <b>L</b> GDS <b>D</b> VRG <b>I</b> FSG <b>K</b> I----G                                      | 2927              |
| GECKO        | -----DLSPDV--IR <b>WIELAK</b> LYRS <b>V</b> GDYD <b>V</b> LRG <b>I</b> FSG <b>R</b> I----G                                     | 2967              |
| TURTLE       | -----ALSPDV--IR <b>WIELAK</b> LYRS <b>V</b> GDYD <b>V</b> LRG <b>I</b> FSG <b>K</b> I----G                                     | 2966              |
| ALLIGATOR    | -----ELSPDV--IR <b>WIELAK</b> LYRS <b>V</b> GDYD <b>V</b> LRG <b>I</b> FSG <b>R</b> I----G                                     | 2924              |
| PLATYPUS     | -----QLPPDV--VR <b>WIELAK</b> LYRS <b>V</b> GEYD <b>V</b> LRG <b>I</b> FSG <b>E</b> I----G                                     | 2956              |
| TASDEVIL     | -----QLSPDV--IK <b>WIELAK</b> LYRS <b>I</b> GEYD <b>V</b> LRG <b>I</b> FSG <b>E</b> I----K                                     | 2960              |
| <b>HUMAN</b> | -----RLPPDV--LR <b>WVELAK</b> LYRS <b>I</b> GEYD <b>V</b> LRG <b>I</b> FT <b>S</b> E <b>I</b> ----G                            | <b>2948</b>       |
| MOUSE        | -----CLPPDV--LR <b>WMELAK</b> LYRS <b>I</b> GEYD <b>V</b> LRG <b>I</b> FSS <b>E</b> L----G                                     | 2949              |
| CRASSO2      | -----NAVVSTDTLS <b>WIELAR</b> LYKS <b>V</b> KEYD <b>V</b> LLG <b>I</b> FSG <b>R</b> I----G                                     | 2936              |
| POMACEA      | -----VTPVTKDDM <b>QWIELAK</b> LYKS <b>L</b> GEF <b>D</b> V <b>LHG</b> IFSG <b>M</b> L----K                                     | 2947              |
| TRICHOPLAX   | -----SSASEATSN <b>WIELSK</b> LYKS <b>I</b> GYD <b>V</b> LRG <b>I</b> FSG <b>H</b> L----G                                       | 2940              |
| NEMATOSTELLA | -----HSPSSDTTAA <b>WLELAK</b> LYRS <b>V</b> EEF <b>D</b> V <b>LHG</b> IFSD <b>H</b> I----G                                     | 2945              |
| PRIAPULA     | -----GMGVSQHTDT <b>WIELAR</b> LYKS <b>L</b> GDYD <b>T</b> LHG <b>I</b> FND <b>K</b> I----G                                     | 2986              |
| SOFTCORAL    | -----GNPSP <b>E</b> STAT <b>WIELSK</b> LYKS <b>V</b> EDF <b>D</b> V <b>LQ</b> G <b>I</b> FNS <b>H</b> I----G                   | 2964              |
| PISTILLATA   | -----TVPPSEV <b>TTCWIELSK</b> LYRS <b>V</b> GDYD <b>V</b> LRG <b>I</b> FT <b>G</b> H <b>I</b> ----G                            | 2992              |
| HEMICHOR     | -----ASLLSQE <b>ISTWIELSR</b> LYKD <b>L</b> DNF <b>D</b> V <b>LRG</b> I <b>F</b> SG <b>K</b> V----G                            | 2985              |
| BELCHER      | -----SSP <b>V</b> SA <b>E</b> TAT <b>WIELAR</b> LYKS <b>L</b> GDF <b>D</b> V <b>LQ</b> G <b>I</b> FS <b>R</b> K <b>V</b> ----G | 2993              |
| STRONG       | -----RPES <b>NQ</b> EM <b>STWIELAR</b> LY <b>KAM</b> GEF <b>D</b> V <b>LRG</b> I <b>F</b> G <b>AL</b> I----K                   | 2990              |
| STARFISH     | -----SREPS <b>E</b> IST <b>WIELAR</b> LY <b>KAL</b> GDF <b>DA</b> V <b>Q</b> G <b>V</b> FS <b>AC</b> I----G                    | 3008              |

:.: :\* : : :

Supplementary Figure 9: Clustal Omega: DNA-PKcs alignment metazoan plus "putative archaeon"

|              |                                                                                                                                                                                                                    | <b>RYG70450.1</b> |
|--------------|--------------------------------------------------------------------------------------------------------------------------------------------------------------------------------------------------------------------|-------------------|
| ARCHAEON     | SDEAAAQMK <b>E</b> AID <b>Y</b> EARG <b>E</b> F <b>T</b> S <b>A</b> VEV <b>Y</b> NSLLRGI-GSNSGSQ <b>L</b> TGPCKKR <b>N</b> FAASQLDAS                                                                               | 3363              |
| MUDCRAB      | R--IKPETRE <b>A</b> LE <b>A</b> EAT <b>N</b> DSVQ <b>A</b> F <b>I</b> I <b>Y</b> RTAL <b>N</b> T--QWPE--EP-----                                                                                                    | 2955              |
| SCORPION     | I---QE <b>E</b> TKQ <b>A</b> LE <b>F</b> ESR <b>G</b> E <b>Y</b> LL <b>A</b> V <b>K</b> I <b>Y</b> SKLYD <b>Q</b> T-EWS <b>A</b> E-EP-----                                                                         | 2978              |
| SPONGE       | T---KDV <b>T</b> R <b>K</b> AL <b>E</b> A <b>E</b> ER <b>G</b> D <b>Y</b> L <b>T</b> AL <b>N</b> L <b>Y</b> KK <b>A</b> ID <b>F</b> --DWPQ <b>G</b> ES <b>P</b> -----                                              | 3006              |
| CAPITELLA    | S---KP <b>A</b> TRL <b>A</b> IE <b>A</b> E <b>T</b> R <b>G</b> D <b>Y</b> RS <b>A</b> L <b>Q</b> L <b>Y</b> NE <b>S</b> L <b>A</b> KE-EWDD <b>G</b> EH <b>P</b> -----                                              | 2977              |
| DANIO        | T---KS <b>I</b> T <b>F</b> T <b>A</b> L <b>Q</b> A <b>E</b> AK <b>S</b> D <b>Y</b> A <b>E</b> AV <b>K</b> L <b>Y</b> NE <b>A</b> L <b>N</b> KE-DWDD <b>G</b> -EP-----                                              | 2997              |
| MILII        | T---K <b>P</b> L <b>T</b> H <b>T</b> AL <b>L</b> A <b>E</b> AK <b>S</b> D <b>Y</b> A <b>E</b> AV <b>R</b> L <b>Y</b> D <b>Q</b> AL <b>N</b> TE-EWMD <b>G</b> -NP-----                                              | 3005              |
| BAMBOO       | T---K <b>S</b> T <b>T</b> Q <b>K</b> AL <b>L</b> A <b>E</b> AK <b>S</b> D <b>Y</b> A <b>E</b> AV <b>Q</b> L <b>Y</b> D <b>Q</b> AL <b>N</b> TE-EWVD <b>G</b> -NP-----                                              | 2996              |
| XENOPUS      | A---KS <b>I</b> T <b>Q</b> CAL <b>N</b> A <b>E</b> AK <b>S</b> D <b>Y</b> AK <b>A</b> AK <b>L</b> Y <b>D</b> EAL <b>T</b> -E-T <b>F</b> SD <b>G</b> -D <b>P</b> -----                                              | 3008              |
| STERLET      | A---KS <b>I</b> T <b>S</b> MA <b>L</b> Q <b>A</b> EAK <b>S</b> D <b>Y</b> A <b>E</b> AV <b>K</b> L <b>Y</b> NE <b>A</b> L <b>N</b> TE-EW <b>T</b> D <b>G</b> -EP-----                                              | 3013              |
| GAR          | A---K <b>P</b> V <b>T</b> SL <b>A</b> L <b>Q</b> A <b>E</b> AK <b>N</b> D <b>Y</b> S <b>Q</b> AV <b>K</b> L <b>Y</b> NE <b>A</b> L <b>N</b> TE-EW <b>M</b> D <b>E</b> -G <b>P</b> -----                            | 3010              |
| LATIMERIA    | T---K <b>Q</b> V <b>T</b> Q <b>K</b> AL <b>L</b> A <b>E</b> AK <b>S</b> D <b>Y</b> SE <b>A</b> V <b>R</b> L <b>Y</b> D <b>E</b> AL <b>N</b> VE-EW <b>P</b> D <b>G</b> -EP-----                                     | 3004              |
| CAECIL       | T---K <b>P</b> H <b>T</b> K <b>D</b> AL <b>L</b> A <b>E</b> AK <b>S</b> D <b>Y</b> A <b>T</b> A <b>A</b> K <b>L</b> Y <b>D</b> EAL <b>N</b> M <b>P</b> -D <b>S</b> W <b>S</b> N <b>D</b> -EP-----                  | 3006              |
| SNAKE        | T---NE <b>I</b> T <b>H</b> NAL <b>L</b> A <b>E</b> AK <b>S</b> D <b>Y</b> A <b>E</b> AV <b>K</b> L <b>Y</b> D <b>K</b> AL <b>S</b> I <b>Q</b> -DW <b>P</b> G <b>D</b> -EP-----                                     | 2992              |
| CANARY       | T---KE <b>I</b> T <b>Q</b> KAL <b>L</b> A <b>E</b> AR <b>N</b> D <b>Y</b> A <b>E</b> AA <b>Q</b> Y <b>D</b> KAL <b>S</b> I <b>Q</b> -DW <b>P</b> D <b>G</b> -EP-----                                               | 2995              |
| OSTRICH      | T---KE <b>I</b> T <b>Q</b> KAL <b>L</b> A <b>E</b> AR <b>S</b> D <b>Y</b> A <b>T</b> A <b>A</b> K <b>H</b> Y <b>D</b> EAL <b>S</b> K <b>E</b> -DW <b>Q</b> D <b>G</b> -EP-----                                     | 2965              |
| GECKO        | T---KE <b>V</b> T <b>Q</b> KAL <b>L</b> A <b>E</b> AN <b>S</b> D <b>Y</b> A <b>E</b> AA <b>K</b> Q <b>Y</b> D <b>E</b> AL <b>S</b> K <b>Q</b> -DW <b>P</b> D <b>E</b> -EP-----                                     | 3005              |
| TURTLE       | T---KE <b>I</b> T <b>Q</b> NAL <b>L</b> A <b>E</b> AR <b>S</b> D <b>Y</b> A <b>E</b> AA <b>K</b> Q <b>Y</b> D <b>E</b> AL <b>S</b> K <b>Q</b> -DW <b>P</b> D <b>G</b> -EP-----                                     | 3004              |
| ALLIGATOR    | T---KE <b>I</b> T <b>Q</b> KAL <b>L</b> A <b>E</b> AK <b>S</b> D <b>Y</b> VE <b>A</b> V <b>K</b> Q <b>Y</b> D <b>E</b> AL <b>S</b> K <b>Q</b> -DW <b>S</b> D <b>G</b> -EP-----                                     | 2962              |
| PLATYPUS     | T---K <b>H</b> V <b>T</b> Q <b>I</b> AL <b>L</b> A <b>E</b> SK <b>S</b> D <b>Y</b> SE <b>A</b> AK <b>Q</b> Y <b>N</b> EAL <b>N</b> M <b>Q</b> -H <b>W</b> E <b>D</b> G-EP-----                                     | 2994              |
| TASDEVIL     | T---K <b>P</b> V <b>T</b> Q <b>N</b> AL <b>L</b> A <b>E</b> AK <b>N</b> D <b>Y</b> SE <b>A</b> AK <b>Q</b> Y <b>N</b> EAL <b>N</b> T <b>Q</b> -E <b>W</b> L <b>E</b> G-D <b>P</b> -----                            | 2998              |
| <b>HUMAN</b> | <b>T---KQITQ<b>S</b>AL<b>L</b>A<b>E</b>AR<b>S</b>D<b>Y</b>SE<b>A</b>AK<b>Q</b>Y<b>D</b>EAL<b>N</b>K<b>Q</b>-DW<b>V</b>D<b>G</b>-EP-----</b>                                                                        | <b>2986</b>       |
| MOUSE        | T---T <b>Q</b> D <b>T</b> Q <b>N</b> AL <b>L</b> A <b>E</b> AR <b>S</b> D <b>Y</b> C <b>Q</b> AA <b>K</b> L <b>Y</b> D <b>E</b> AL <b>N</b> K <b>L</b> -E <b>W</b> V <b>D</b> G-EP-----                            | 2987              |
| CRASSO2      | T---Q <b>D</b> I <b>T</b> K <b>E</b> AV <b>Q</b> M <b>E</b> AR <b>G</b> D <b>Y</b> Y <b>K</b> AV <b>K</b> L <b>Y</b> N <b>Q</b> AL <b>S</b> C <b>N</b> -D <b>W</b> D <b>E</b> --N <b>P</b> -----                   | 2973              |
| POMACEA      | T---KE <b>V</b> T <b>Q</b> L <b>A</b> L <b>I</b> E <b>S</b> H <b>S</b> E <b>Y</b> K <b>A</b> A <b>I</b> A <b>L</b> Y <b>N</b> K <b>A</b> L <b>E</b> S <b>A</b> -D <b>H</b> D <b>P</b> --R <b>P</b> -----           | 2984              |
| TRICHOPLAX   | T---K <b>D</b> I <b>T</b> Q <b>R</b> AL <b>E</b> A <b>E</b> SR <b>H</b> D <b>Y</b> AA <b>A</b> V <b>K</b> Y <b>N</b> Q <b>A</b> M <b>D</b> C <b>S</b> -S <b>W</b> P <b>D</b> G-EP-----                             | 2978              |
| NEMATOSTELLA | T---K <b>P</b> I <b>T</b> R <b>L</b> AL <b>E</b> A <b>E</b> AR <b>G</b> D <b>Y</b> A <b>Q</b> A <b>L</b> K <b>I</b> Y <b>N</b> E <b>A</b> M <b>S</b> C <b>D</b> -D <b>W</b> S <b>S</b> --K <b>P</b> -----          | 2982              |
| PRIAPULA     | T---Q <b>T</b> C <b>T</b> Q <b>E</b> AL <b>Q</b> A <b>E</b> AS <b>C</b> D <b>Y</b> K <b>L</b> A <b>R</b> K <b>L</b> Y <b>Q</b> R <b>A</b> L <b>E</b> -M-E <b>W</b> G <b>E</b> S <b>E</b> G <b>P</b> -----          | 3024              |
| SOFTCORAL    | T---Q <b>S</b> I <b>T</b> K <b>D</b> AL <b>E</b> A <b>E</b> GR <b>G</b> D <b>Y</b> T <b>E</b> A <b>L</b> K <b>L</b> Y <b>S</b> Q <b>A</b> T <b>N</b> C <b>D</b> -E <b>W</b> P <b>A</b> G <b>S</b> S <b>P</b> ----- | 3003              |
| PISTILLATA   | T---K <b>D</b> I <b>T</b> R <b>E</b> AM <b>E</b> A <b>E</b> AR <b>G</b> D <b>Y</b> S <b>Q</b> A <b>L</b> K <b>L</b> Y <b>N</b> E <b>A</b> I <b>G</b> T <b>D</b> D <b>V</b> W <b>I</b> K <b>E</b> -E <b>L</b> ----- | 3031              |
| HEMICHOR     | T---Q <b>P</b> V <b>T</b> R <b>E</b> AL <b>E</b> A <b>E</b> AS <b>A</b> N <b>Y</b> Q <b>K</b> A <b>A</b> N <b>L</b> Y <b>D</b> EAL <b>G</b> C <b>T</b> -D <b>W</b> P <b>D</b> G-R <b>P</b> -----                   | 3023              |
| BELCHER      | T---Q <b>T</b> V <b>T</b> Y <b>E</b> AL <b>E</b> A <b>E</b> AR <b>G</b> D <b>F</b> K <b>K</b> AV <b>E</b> L <b>Y</b> N <b>Q</b> A <b>M</b> Q <b>E</b> T-E <b>W</b> P <b>D</b> P-Q <b>P</b> -----                   | 3031              |
| STRONG       | T---K <b>D</b> V <b>T</b> Q <b>E</b> A <b>I</b> Q <b>A</b> ES <b>R</b> G <b>D</b> Y <b>E</b> S <b>A</b> L <b>E</b> L <b>Y</b> S <b>K</b> A <b>I</b> S-S-D <b>W</b> G <b>P</b> D-G <b>V</b> -----                   | 3027              |
| STARFISH     | T---H <b>E</b> I <b>T</b> K <b>T</b> AL <b>E</b> A <b>E</b> AR <b>G</b> D <b>Y</b> S <b>T</b> A <b>L</b> K <b>L</b> Y <b>N</b> Q <b>A</b> F <b>E</b> -M-D <b>W</b> D <b>E</b> G-A <b>V</b> -----                   | 3045              |

\*: \* : \* \*

Supplementary Figure 9: Clustal Omega: DNA-PKcs alignment metazoan plus "putative archaeon"

|              |                                                                  | <b>RYG70450.1</b> |
|--------------|------------------------------------------------------------------|-------------------|
| ARCHAEON     | SLGQGQVLGLLVGRSLECYHKLASWESLYSCTAY-LFEG-SGVVDRMDLDGESAQRVLS      | 3421              |
| MUDCRAB      | ---DPAEVHLWEECYASCAAKLGQWSELENFVENRLKDEAGQVSLN-----QVWTL         | 3004              |
| SCORPION     | ---NQAEIDLWDNAILQCYDYLTQWDLQLQSLIIN-RLDENQKQPNLN-----KIWEE       | 3026              |
| SPONGE       | ---PQVEEDLWEDSLLNAYSHLTKWKDLEKASTC-NIGE-ETNSKLE-----QLWKD        | 3053              |
| CAPITELLA    | ---TEAEINMWDSRIECAENLTQWRDVETLSTS-DLE----GSSLS-----AVWDS         | 3021              |
| DANIO        | ---TITEKDFWEIAALEAYNHLEWKSLEYCATV-NIDD-SSPIRLD-----RMWTE         | 3044              |
| MILII        | ---METEKDFWEIAALECYNHLEWKALEYCSTV-NIDD-KTPADIE-----NIWSD         | 3052              |
| BAMBOO       | ---TDAEKDFWDIAALECYSHLEWKSLEYCSTV-NISD-KTPVDLE-----DIWTD         | 3043              |
| XENOPUS      | ---TDAEKDFWELASLECYNHLEWKPLEYCSTV-NIDT-GKPPDLN-----KMWSD         | 3055              |
| STERLET      | ---AEAEDLWEIAALESYSHLEWKSLOQCSTV-NIDD-SSPADLE-----KIWGD          | 3060              |
| GAR          | ---TDTEKDFWEIAALECYNHLEWKSLOQCSTV-NIGD-SSPVDLE-----KMWSD         | 3057              |
| LATIMERIA    | ---TEAEKDFWELAALCYSHLEWKALEYCSTV-NIDD-KTPADLE-----NIWND          | 3051              |
| CAECIL       | ---TEAEKDFWEVAALCYNRLTEWKPLEYCSTV-NIDD-SKPADLN-----KIWND         | 3053              |
| SNAKE        | ---TEAEKDFWKIASLECYNHLEWKSLEYRLTV-NIDN-GQPADLN-----KIWSD         | 3039              |
| CANARY       | ---TEAEKDFWELASLECYDHLTMWKSLEYCATV-NIDS-GKPPDLS-----KTWND        | 3042              |
| OSTRICH      | ---TEAEKDFWELASLECYDHLTEWKSLEYCATV-NIDS-GQPADLN-----KTWND        | 3012              |
| GECKO        | ---IEAEKDFWEFASLECYDHLTEWKSLEYCSTV-NIDD-KQPPDLN-----KTWSN        | 3052              |
| TURTLE       | ---TEAEKDFWELASLECYNHLEWKSLEYCSTV-NIDS-GQPPDLN-----KTWSD         | 3051              |
| ALLIGATOR    | ---SEAERDFWELASLECYDHLTEWKSLEYCSTL-NIDS-EQPADLN-----KTWSD        | 3009              |
| PLATYPUS     | ---SEAEKDFWELAVLECYNHLEWKSLEYCSTV-NIDS-ESPPDLN-----KIWND         | 3041              |
| TASDEVIL     | ---TEAEKDFWELAALCYNHLEWKSLEYCSTI-NVDS-ENPPDLS-----KMWSE          | 3045              |
| <b>HUMAN</b> | <b>---TEAEKDFWELASLDCYNHLAEWKSLEYCSTA-SIDS-ENPPDLN-----KIWSE</b> | <b>3033</b>       |
| MOUSE        | ---TEAEKEFWELASLDCYNNLSKWKELEYCSTV-NIVS-ENSLDLS-----KMWSE        | 3034              |
| CRASSO2      | ---PTIEVDMWDESRMECLDNLSQWKELEGVAMS-GIS----SNSIS-----QVWKD        | 3017              |
| POMACEA      | ---LEAEIDLWDESRMECLNRLTEWTKLEMVTTD-ALSQ-EGEISLA-----SVWDD        | 3031              |
| TRICHOPLAX   | ---QAEEDLWEISRLECLYNLTQWDKLEYLSLV-NVD-NNDPPSFD-----KIWED         | 3025              |
| NEMATOSTELLA | ---QQQEEEDLWDDARMQCFANLAKWGDLEEYSKT-GVDDEGNPPDL-----KIWTD        | 3030              |
| PRIAPULA     | ---GQGERDLWDISLMQCLDRLTDWTALDAHTKECLIPESSEADLQ-----LLWED         | 3073              |
| SOFTCORAL    | ---LQAEEDFWDDSILECCRRLTLWDKMDHNCIV-NFDEANGVLDLN-----QIWRD        | 3051              |
| PISTILLATA   | ---RQEEEDLWDDVSRQLCLADLTKWKELEKCSVE-SIDD-KNPPDL-----KVWSD        | 3078              |
| HEMICHOR     | ---EQVEEDLWDDCRLQCYEQLTDWQKLEQASTI-NIDD-NDPPDL-----KIWDD         | 3070              |
| BELCHER      | ---LAVEEDLWDDSRQLQCYDHLTQWKNLYEVSTV-NIDE-DSPPNLD-----KMWDD       | 3078              |
| STRONG       | ---AREEEDFWDEARLQCCNQLTKWDDMESFSTD-QIEG-KGSNDLS-----QIWND        | 3074              |
| STARFISH     | ---SQVEEDLWDESRLNCCNQLTQWKELOQNYSTV-NIDD-NSPHDLG-----KIWSD       | 3092              |
|              | : . . * * :                                                      |                   |

Supplementary Figure 9: Clustal Omega: DNA-PKcs alignment metazoan plus "putative archaeon"

|              |                                                                    | <b>RYG70450.1</b> |
|--------------|--------------------------------------------------------------------|-------------------|
| ARCHAEON     | FVLNQSLADEDRAAHLRRTAASYLRSFIHLSFPLLEKPLAMQSRAFLATQLIALK----        | 3477              |
| MUDCRAB      | P-----R-----PAVSVLPSIVNSKLM-----ILDGSE-TDRNLNAFIDSALGEPNH          | 3046              |
| SCORPION     | P-----Y-----YQENYLPFLIKSKLKL----LIENR--NDQSLLCFIDSALKEENK          | 3067              |
| SPONGE       | S-----Y-----CQEHYLPFVLSKSKLKL----WCTDD--SDHGLASFLDKSLSEEAN         | 3094              |
| CAPITELLA    | T-----Y-----HQEVYLPPLRSKIKL----ILNGDT-SQDNLLSFIEESLKTPVH           | 3063              |
| DANIO        | T-----F-----YVETYLQYMMRSMLKQ----LQMG--TNQDLLSFVDAAMKTEEH           | 3085              |
| MILII        | T-----F-----YQETYLSYMIIRSKVKL----LQSGE--VDQSLLTFFVDRAMKVEQR        | 3093              |
| BAMBOO       | P-----F-----YMEAYLPHMIRSKVKL----LQLGE--NDQSLLTFFVDNAMKVDQR         | 3084              |
| XENOPUS      | P-----F-----YQETYLPYMIIRSKLKM----LLGGN--NDQTLTFFVDEAMKVEQR         | 3096              |
| STERLET      | P-----F-----YQEAYLPYVIRSSVKL----LQLGE--PDQSLLTFFVDNAMKVEER         | 3101              |
| GAR          | P-----F-----YQEAYLPYVIRGMVKQ----LQLGG--QDQSLLTFFVDNAMKVEER         | 3098              |
| LATIMERIA    | P-----F-----YQETYLPYLMIRSKVKL----LLGQ--GDQSLLTFFIDNAMKVEER         | 3092              |
| CAECIL       | P-----F-----YQETYLPYMIIRSKVKL----LLQK--DDQSLLTFFIDNAMKVEQR         | 3094              |
| SNAKE        | P-----F-----YQEAYLPYVIRSKLKL----LFHGG--SDQSLLTFFIDEAMKAEEK         | 3080              |
| CANARY       | P-----F-----FQETYLPYIIRSKLKL----LLSGE--NDQTLTFFIDEAMKTEQK          | 3083              |
| OSTRICH      | P-----Y-----YQETYLPYIIRSKLKL----LLNGE--NDQTLTFFIDEAMKTEQK          | 3053              |
| GECKO        | P-----F-----YQETYLPYIIRSKLKL----LLHGG--DDQSLLTFFIDEAMKTEQK         | 3093              |
| TURTLE       | P-----F-----YQETYLPYIIRSKLKL----LLHGG--NDQSLLTFFIDEAMKIEQR         | 3092              |
| ALLIGATOR    | P-----F-----FQETYLPYIIRSKLKL----LLHGG--SDQSLLTFFIDEAMKIEQR         | 3050              |
| PLATYPUS     | P-----F-----YQETYLPYMIIRGKLLK----LLQGG--SDQSLLTFFMDEAMKKEKQ        | 3082              |
| TASDEVIL     | P-----F-----YQETYLPYMIIRSKLKL----LLQGA--SDQSLLTFFIDEAMKKEPQ        | 3086              |
| <b>HUMAN</b> | <b>P-----F-----YQETYLPYMIIRSKLKL----LLQGE--ADQSLLTFFIDKAMHGELQ</b> | <b>3074</b>       |
| MOUSE        | P-----F-----YQETYLPYVIRSKLKL----LLQGE--GNQSLLTFFVDEAMNKELQ         | 3075              |
| CRASSO2      | T-----Y-----YQEHYLPYIIRSKVKL----MLQGDG-DQQPLLTFFIDDCMKQTEQ         | 3059              |
| POMACEA      | T-----Y-----YMETYLPYLIRSKLKL----LLHGDE-KQQSLLSFIDDSMKNPQH          | 3073              |
| TRICHOPLAX   | N-----Y-----YQENYLPFLKSKAKV---MCENDLAGSDDFIQYLNKSLANDEH            | 3068              |
| NEMATOSTELLA | T-----Y-----LQEHYLPFIMRSSIKL----ICEGEE--RPCFLEFLRHSMNNEER          | 3071              |
| PRIAPULA     | T-----Y-----YEENHLPFVMRARLKR----LLVEG-ARDQTLTFFVDAATGHPDR          | 3115              |
| SOFTCORAL    | D-----Y-----YKEHYLPFLCSTKTK----FCIGD--RDEVFFNFIFDSLKNEER           | 3092              |
| PISTILLATA   | T-----F-----YQEHYLPHLITSKLKL----QCQGS--GDMTLNEFVAKAMKTSER          | 3119              |
| HEMICHOR     | T-----Y-----YQEHYLPYVIRSKLKL----LMEDDDTDDQSLLTFFIDKSMQHKER         | 3113              |
| BELCHER      | T-----Y-----FQEHYLPFTIRSKLKL----LLEGE--MDQSLTFFVDSAMQKPDR          | 3119              |
| STRONG       | D-----Y-----QQEYLPYMMIRSKLKR----LMEGS--EDDSSLGFIDSAMKQEK           | 3115              |
| STARFISH     | T-----F-----YQELYLPYMMIRSKLKL----LMEGG--EDETLLQFIDASMSDADK         | 3133              |

: . : .

Supplementary Figure 9: Clustal Omega: DNA-PKcs alignment metazoan plus "putative archaeon"

|              |                                                                                                                                                         | <b>RYG70450.1</b> |
|--------------|---------------------------------------------------------------------------------------------------------------------------------------------------------|-------------------|
| ARCHAEON     | SNHSASLSSLDLAASHILLEDDYQASLAMKDAVSTFLNKF <del>T</del> MLHAVAYKG--KAGLLLSL                                                                               | 3535              |
| MUDCRAB      | RNLESTLPLPLAIMSAHQQKMAQARHYITLATSKVLLTLAQSSLLTPKP--LTGTVRDI                                                                                             | 3104              |
| SCORPION     | KKYLEENFSEELALLYIIQENYDRAQYYSQLCLQDFLKEWSSLNVLMPII--RKTQLQSL                                                                                            | 3125              |
| SPONGE       | RSVLESHYPQELT <del>T</del> LSYVLRDDYDRA <del>Y</del> YYLSLSL <del>K</del> AKQ <del>Q</del> IW <del>S</del> VQDGISSSTGAVSSTVQSL                          | 3154              |
| CAPITELLA    | KAFIEGSFSSELALVCIHQELYDKAKHYANMSLQAFIQDWANLSTTRTST--RATKLQKL                                                                                            | 3121              |
| DANIO        | KIIMETHYSQEL <del>S</del> LLYILQEDYDRA <del>K</del> YYANNCM <del>Q</del> VFMQNY <del>S</del> SIDPLLNRS--RLTVLQSV                                        | 3143              |
| MILII        | KAVIETYYSQEL <del>S</del> LLYILQDDVDRA <del>K</del> YYINNCMEVFMQNY <del>S</del> SIDTLLHQS--RLTKLQSL                                                     | 3151              |
| BAMBOO       | KTVIETRYSQEL <del>S</del> LLYILQDDFDR <del>A</del> KYYVNNSIQSFMQNY <del>S</del> SIDPLLHRS--RLTKLQSL                                                     | 3142              |
| XENOPUS      | KVLMETFYSQEL <del>S</del> LLYILQDDFDR <del>A</del> KYYINNGIQVFMQNY <del>S</del> SIDCLLYQS--RLTKLQSV                                                     | 3154              |
| STERLET      | KSIIETSYSQEL <del>S</del> LLYILQGDFDR <del>A</del> KYYVNNCM <del>Q</del> VFMQNY <del>S</del> SIDTLLPGS--RLTKLQSV                                        | 3159              |
| GAR          | KSVMETNYSQEL <del>S</del> LLYILQDDYDRA <del>K</del> FYINNSMQVFIQNY <del>S</del> SNIDALLYGS--RLAKLQSV                                                    | 3156              |
| LATIMERIA    | KALLETHYSQEL <del>S</del> LLYILQDDFDR <del>A</del> KYYVGNCM <del>Q</del> VFMQNY <del>S</del> SIDTLQHKS--RLTKLQSV                                        | 3150              |
| CAECIL       | KALLETNYNQEL <del>S</del> LLYILQDDFDR <del>A</del> KYYIDNGIQVFMQSH <del>S</del> SIDTLLNKS--RLTKLQSV                                                     | 3152              |
| SNAKE        | KALIEMYYSQEL <del>S</del> LLYILQDDFDR <del>A</del> RYVKNAM <del>Q</del> VFMQNY <del>S</del> SNIDSLFNS--RMIKLQSV                                         | 3138              |
| CANARY       | KAIIEMHYSQEL <del>S</del> LLYILQDDFDR <del>A</del> KYYISNGM <del>Q</del> IFMQSY <del>S</del> SIDSLLYQS--RITKLQSV                                        | 3141              |
| OSTRICH      | KAIIEMRYSQEL <del>S</del> LLYILQDDFDR <del>A</del> KYYISNGL <del>Q</del> IFMQSY <del>S</del> STD <del>T</del> LLHQS--RMTKLQSV                           | 3111              |
| GECKO        | KALIEMYYSQEL <del>S</del> LLYILQDDFDR <del>A</del> KYYISNAM <del>Q</del> VFMQNY <del>S</del> SIDSVLHQS--RLTKLQSI                                        | 3151              |
| TURTLE       | KALIEMYYSQEL <del>S</del> LLYILQDDFDR <del>A</del> RYIISGM <del>Q</del> VFMQNY <del>S</del> SIDTLLHQS--RLTKLQSV                                         | 3150              |
| ALLIGATOR    | KALIEMHYSQEL <del>S</del> LLYILQDDFDR <del>A</del> RYIISNGM <del>Q</del> VFMQNY <del>S</del> SIDALLHQS--RLTKLQSV                                        | 3108              |
| PLATYPUS     | KTLEIETHYSQEL <del>S</del> LLYILQDDFDR <del>A</del> KYYIDYCI <del>Q</del> IFMQNY <del>S</del> SNIDALLQS--RLTKLQSV                                       | 3140              |
| TASDEVIL     | KTLEIEVHYSQEL <del>S</del> LLYILQDDFDR <del>A</del> KYYIENSI <del>Q</del> VFMQNY <del>S</del> SIDALLHQS--RLTKLQSV                                       | 3144              |
| <b>HUMAN</b> | <b>KAILELHYSQEL<del>S</del>LLYLLQDDVDRA<del>K</del>YYIQNGIQSFMQNY<del>S</del>SIDVLLHQS--RLTKLQSV</b>                                                    | <b>3132</b>       |
| MOUSE        | KTVLELQYSQEL <del>S</del> LLYILQDDIDRA <del>T</del> YYIKNGIQIFMQNY <del>S</del> SIDVLLYRS--RLAKLQSV                                                     | 3133              |
| CRASSO2      | KALIESRYSEELALMYIWQADYDRA <del>R</del> HYSTLAT <del>Q</del> QFLLDW <del>S</del> STD <del>S</del> LM <del>S</del> VS--RKS <del>Q</del> L <del>Q</del> RL | 3117              |
| POMACEA      | RAHLESRYCEDLALMYVWQKNFDL <del>A</del> RHYARLAV <del>Q</del> SFFQDW <del>S</del> STD <del>S</del> LM <del>T</del> AS--RTH <del>C</del> L <del>Q</del> RL | 3131              |
| TRICHOPLAX   | LSVLENRHCDCLALIHVLEKYDRA <del>R</del> YYLDFSI <del>Q</del> KFLQDW <del>S</del> ALDSTLLYS--RASKLQSL                                                      | 3126              |
| NEMATOSTELLA | KAFLESRYGDDLALLFILRDDYGRA <del>R</del> YHVTNCF <del>Q</del> AFLKDW <del>S</del> GLSSMMVSS--RASKLQSI                                                     | 3129              |
| PRIAPULA     | RAVIETWHGEEALALLYIVQGDYTRA <del>R</del> HHAARCL <del>Q</del> AFLRDW <del>A</del> SLDALMLAS--RAARL <del>R</del> SL                                       | 3173              |
| SOFTCORAL    | KVYLENKYS <del>D</del> LALLFILDEDYDRA <del>R</del> YYTSICL <del>Q</del> AFL <del>E</del> DW <del>S</del> GLDSIMTSS--RSAHL <del>Q</del> SL               | 3150              |
| PISTILLATA   | AALLRSRYSDSLALMYVLQDNCDS <del>A</del> SYAALSE <del>Q</del> SFLSDW <del>A</del> GLDSNLRSS--RSIKL <del>Q</del> SL                                         | 3177              |
| HEMICHOR     | KALIENRYSEALAMLYLLQDDYDRA <del>R</del> YYTANCI <del>Q</del> SFLQDW <del>S</del> GTDTLMGTI--RSSKL <del>Q</del> CV                                        | 3171              |
| BELCHER      | KALLESRYCEELAMLYLYQDDYGRA <del>K</del> YYVGNC <del>T</del> DAFLQEW <del>S</del> GMDRLMTSS--RAAKL <del>Q</del> SL                                        | 3177              |
| STRONG       | RVILESRYTEELAALSILKEDYNRA <del>K</del> YYLANST <del>S</del> SFLQEW <del>S</del> GLGPLMLTS--RLSKL <del>Q</del> DI                                        | 3173              |
| STARFISH     | RAFLEARYSEELSTLYTIQEDYDRA <del>M</del> FYLANCR <del>Q</del> SFLHDW <del>S</del> GLGPLMISS--RRAKL <del>Q</del> CI                                        | 3191              |
|              | * : * . :                                                                                                                                               |                   |

Supplementary Figure 9: Clustal Omega: DNA-PKcs alignment metazoan plus “putative archaeon”

|              |                                                              | <b>RYG70450.1</b> |
|--------------|--------------------------------------------------------------|-------------------|
| ARCHAEON     | QRMNELRDFIFYNTQ-QAYIASKISAMQGLANSTGQOKKIALNNLEDDIIKAWTLSEPNI | 3594              |
| MUDCRAB      | QLVTELGEFLETLDY-THNEN-----YPNKVRKTVKNWKTQETCL                | 3143              |
| SCORPION     | QKHIELQEFLNFDIT-YRNI-----DEYHFKNLTDRLWKRYPDI                 | 3163              |
| SPONGE       | QRLTEMNEFITFMKS-NDNFSSP-----G--PVNNLLRKWRKRFPDP              | 3193              |
| CAPITELLA    | QEFTEMQEFLSVIKTTSG-E--D-----FPRQIDRTLHKWEARSPDR              | 3160              |
| DANIO        | QALTEIQDFLNYITG-DV---SV-----N--SLKFMIRRWTSHPDA               | 3179              |
| MILII        | QAVTEMQDFLHFISK-EYNFISE-----V--PLRKLRLRTWTGRYPDA             | 3190              |
| BAMBOO       | QTLTEIQDFLHFITK-GSNLTSE-----V--PLRKLVRTWIGRYPES              | 3181              |
| XENOPUS      | QALTEIQDFISFIRK-PGNVSS-----S--SLRKLQFGWMKRYPDS               | 3192              |
| STERLET      | QALTEIQDFLNFMTK-DV---SQ-----T--SLKSLIRIWTDRYPDA              | 3195              |
| GAR          | QALTEIQDFLYFITK-DV---ST-----A--SLKTLIRTWTHRYPDD              | 3192              |
| LATIMERIA    | QALTEMQDFLGFISK-PDHLNSR-----A--SLRLLRNWSDRYPDA               | 3189              |
| CAECIL       | QALTEITKDFIHFISK-PSNLTSQ-----T--SLKRLLRIWSSRYPDS             | 3191              |
| SNAKE        | QALTEIQDFINFMSK-ESSLTFQ-----A--SLKRLLNIVRSRYPDT              | 3177              |
| CANARY       | QALTEIQDFINFMTK-RSNLASE-----A--SLKRLRLRTWTSRYPDA             | 3180              |
| ONSTRICH     | QTLTEIQDFIHFMTK-TSNLASQ-----A--SLKRLLRIWTSRYPDA              | 3150              |
| GECKO        | QTLTEIQGFVNFISR-SGNIASQ-----A--SLKRLISIVMSRYPDS              | 3190              |
| TURTLE       | QALTEIQEFINFISK-PSSLASQ-----V--SLKRLLRIVRSRYPDD              | 3189              |
| ALLIGATOR    | QALTEIQDFINFMRE-PSNLASQ-----A--SLKRLLRIWTSRYPDA              | 3147              |
| PLATYPUS     | QALTEIQDFTNFISR-PSNLSSQ-----A--SLKRLLRIWTRYPDA               | 3179              |
| TASDEVIL     | QALIEIQDFVNFMSK-QGNLSSQ-----A--PLKRLLRIWTRYPDA               | 3183              |
| <b>HUMAN</b> | <b>QALTEIQEFISFISK-QGNLSSQ-----V--PLKRLLNTRWTRYPDA</b>       | <b>3171</b>       |
| MOUSE        | QTLAEIEEFLSFICK-HGDLSSL-----G--PLRLLKTRWTRYPDV               | 3172              |
| CRASSO2      | QPLVELQEFLSFMAS-EGNFTSV-----T--PANSLIERWQARALHP              | 3156              |
| POMACEA      | QPLLELQEFLDVAD-KNNFTSF-----E--PSHQLIARWEQRYPHV               | 3170              |
| TRICHOPLAX   | QTLTEMQEFLQFMDD-GRNFESV-----T--PVLSLISKWSTRFPNE              | 3165              |
| NEMATOSTELLA | QKITEMQEFLEFVVK-EGKLLK-----K--TLEDLFSRWSVRFPS                | 3167              |
| PRIAPULA     | QKLTEMNEFLDAITATPDFAFTRN-----D--TARALVDRWMDHMPHP             | 3213              |
| SOFTCORAL    | QALTEMQEFLDFISH-EDNFSTI-----S--SVKSLLKRWSSREPDP              | 3189              |
| PISTILLATA   | QKITEMQEFLEFIAE-EGNF--S-----SPMPVLSLLNKWYSRLPHP              | 3216              |
| HEMICHOR     | QKLEMQEFLTFITN-ERNFDEH-----K--PVSDLISKWTKRPLDV               | 3210              |
| BELCHER      | QKLTEMQEFLELISN-DRNF--E-----TPWPVTRLLEKWSSRYPDN              | 3216              |
| STRONG       | QKLTEAEQFLQLANK-PFSEGLK-----S--SATRLVSDWSRNLDPD              | 3212              |
| STARFISH     | QRLTEKQNFLLKLAIK-PDLQEA-----GCQKSLELLDRWSGCHLDS              | 3232              |
|              | * * * * *                                                    |                   |

Supplementary Figure 9: Clustal Omega: DNA-PKcs alignment metazoan plus "putative archaeon"

|              |                                                                     | <b>RYG70450.1</b> |
|--------------|---------------------------------------------------------------------|-------------------|
| ARCHAEON     | -FDPLHHWSDVIWTRSLMLQKLADSNQDAQ-----LSAKG-----AEH                    | 3633              |
| MUDCRAB      | -TDSSVLMQFLSSHRELYFQFLEKELPQD-----CLED                              | 3175              |
| SCORPION     | -FDSVNIWDDIIMNRSLYMEKIVSKLQETNNQ--STSFSLLEESMDTS--IVDSEPNSYFD       | 3218              |
| SPONGE       | KLDPVPIWDDIITTRWMLLRKISTKLQDSVLS-QQCEYLLDDDG-----SSCS               | 3240              |
| CAPITELLA    | LLDSVVIWDDNIILNRNVYMDHFAEHLTSDAK-----                               | 3192              |
| DANIO        | KLDPMNWDDIITSRCFFLDKILKRLKST-----PENSMSEVDGADQG-----SGEE            | 3225              |
| MILII        | KMDPMSIWDDVITNRCFFLDKIQRVLSV-----QADESMSEVDREGEVETRMEVDKEEED        | 3245              |
| BAMBOO       | KLDPMSVWDDVITNRCFFLDKIKERLSLL-----QADDSMEVDDEGA-ETQMDIDKEEDD        | 3235              |
| XENOPUS      | KMDPMNIWDDIISNRCFFLDKIQDVAVGHPQ---LVDESMSEVDDLADGNEAMEVDR-QED       | 3248              |
| STERLET      | KMDPMNVWDDIITTRCFFLDKIAGKLTNS-----EADNSMEVDGGEDTGVKMEVDE-PED        | 3249              |
| GAR          | RMDPMNVWDDVITNRCFFLDKISEKLVSS-----VAGDSMEVEEDGDKEIKTEAGE-WED        | 3246              |
| LATIMERIA    | KMDPVNIWDDIITNRCFFLDKIQEHLCKV-----PADESMSEVDGEGDASPRMDVDE-EPN       | 3243              |
| CAECIL       | KMDPMNVWDDIITNRCFFLDKIREKLPHF-----QADDSMEVDGGGDASDRMELGGEEED        | 3246              |
| SNAKE        | KMDPMNIWDDIITNRCFFLDKIQEKFSS-----HLDDSMELDGDAT--FSMEIDNENQD         | 3230              |
| CANARY       | KMDPMNIWDDIITNRCFFLDKIQEKLPSD-----QANDSMSEVDGEYSAGDQMEVDQOGEN       | 3235              |
| OSTRICH      | KMDPMNIWDDIITNRCFFLDKIQEKLPRD-----QANDSMSEVDEKDDIGDQMEADQOGED       | 3205              |
| GECKO        | KMDPMNIWDDIITNRCFFLNKIQERLPNT-----HLEDSEMEVDGGGDANDNIEGGNEKED       | 3245              |
| TURTLE       | KMDPMNIWDDIITNRCFFLGKIQEKLPI-----QADDSMEVDGRGDVGDKMETDMQEED         | 3244              |
| ALLIGATOR    | KMDPMNIWDDIITNRCFFLDKIQEKLLNV-----QADDSMEVVEAGDIGDEMEVDQOQEDN       | 3202              |
| PLATYPUS     | KMDPMNIWDDIITNRCFFLSKIQEKLGL-----QADDSMEMDGGGDTTDRMELEKQEDD         | 3234              |
| TASDEVIL     | KMDPMNIWDDIITNRCFFLNKIQEKLNCL-----QLDDSMSEVEGDGHFIDKVEVEKQEED       | 3238              |
| <b>HUMAN</b> | <b>KMDPMNIWDDIITNRCFFLSKIEEKLTP-----PEDNSMNVDDQDGDPSDRMEVQEQEED</b> | <b>3226</b>       |
| MOUSE        | VTDPMHIWDDIITNRCFFLSKIEERLTAP-----SGDHSMSVDEDEESIDR-EVYEPKED        | 3226              |
| CRASSO2      | LLDTEAVWDDNVVTNRMVFLDHSNRLSTSLVK--KEEDAMEEDE-----                   | 3198              |
| POMACEA      | QLDLVDIWDVVTNRNVYMDKIRDQMLSSNLM--EE-----DHD-----                    | 3207              |
| TRICHOPLAX   | VIDPINVWDDVIVNRCMYLRKILLQYRVIQTAFTSTEDSMSEIDGEDRVIY-----TFPA        | 3219              |
| NEMATOSTELLA | KLHPISVWDDVITNRRIFGLTVC-----VYRPDSMDVDGGEWS-CP-----SVDA             | 3210              |
| PRIAPULA     | TLDPVSIWDDTVINRCLYMDHLRHFHGNQPA-G-----                              | 3246              |
| SOFTCORAL    | KLHSGVWEDVMTNRSVFLDKILLKFGQSSQL-HSSEDSMEIDGLN-----TTQ               | 3237              |
| PISTILLATA   | ILHPIGVWDDIVTNRVLFMSKFLQKFEAMGAE-ERSGIC----L-----DD                 | 3257              |
| HEMICHOR     | KRDSNTWDDVITNRFVYLRKLFQKSGDAMEG----D-----DG-----QA                  | 3247              |
| BELCHER      | RMDPISVWDDIIANRCLYLDKLNDFEQMAAR-GVLD--TEVGG-----EP                  | 3259              |
| STRONG       | KRDPISVWDDVTQYRCLYMDKLCNLLGDSGGG-GGGGDSMETED-----QK                 | 3257              |
| STARFISH     | KKDPINIWDDVVSRLLYMDKLGSRFIRSESQ-QAGE-----EE-----TA                  | 3272              |

. . \* . .

Supplementary Figure 9: Clustal Omega: DNA-PKcs alignment metazoan plus “putative archaeon”

|              |                                                               | End RYG70450.1          | Start RYG70459.1 (Archaeon) |
|--------------|---------------------------------------------------------------|-------------------------|-----------------------------|
| ARCHAEON     | IS-----GMFLRSVAVAVAQGKLTAVKPLETANAVR-----                     | KGMRVMCYLCFTV           | 3678                        |
| MUDCRAB      | IQKLMKDAKSSLHKSVIKTALMNKNYHLANRHLLKCLRPLCGD----               | DEELA-KFYFLMTE          | 3230                        |
| SCORPION     | SEKFLKEQRLKMKLKFVEAALLQGNLQVAVKHLKWSQQIAKE-LKADH-HWINCIHLYCK  |                         | 3276                        |
| SPONGE       | VDSMMKNENINMFMRAADAARTQSNYPVAENYLNKIVEKSILKDFPDNYFIQLRWLHSLIK |                         | 3300                        |
| CAPITELLA    | -IDPFGKQRVVMSLAQVDAASLQGNHVSARKLLKSADLVKV--VDSEELSVLFTHSHAN   |                         | 3249                        |
| DANIO        | LGVLVKTCFNMKLMQADSARKQNNFPVASKLLKELHRHA----                   | KIDDARLLRWVHSFSR        | 3281                        |
| MILII        | INMAIRSCKFNMKLMKMAESGTKQNNFAVAMKLLKELHKES----                 | KARDDWAVKWTHTYSR        | 3301                        |
| BAMBOO       | ITMLIRSCKFNMKLMKLESARKQNNFSVSTKLLKELHKES----                  | NIRIDWRVRWISYSR         | 3291                        |
| XENOPUS      | IAVMINKCRFTMKMKMVDASARKQNNFSVAMKLLKDLHRES----                 | KTNEEDWSVKWIHSYSR       | 3304                        |
| STERLET      | VGSMIRGCKFMSKLMADSARKQNNFSVATKLLKELHRES----                   | KNQEDWLVWRVHSFSR        | 3305                        |
| GAR          | PDFLIKDCIKSMRLKMAESARKQNNFSVAKLLKALHKEC----                   | KARSHWNLRWAHGFCR        | 3302                        |
| LATIMERIA    | ISAMVQSCFNMKLMKMAESARKQNNFSVATKLLKELHRES----                  | KSREECLTRVWHSYSR        | 3299                        |
| CAECIL       | ITSMIKSCKFNMKLMKVESARKQNNFSVAMKLLKDLHRES----                  | KTRDDWSVRWIHSYCH        | 3302                        |
| SNAKE        | THTMIKNCKFAMKMKMIECARKQNSFVALKLLKDLHGDS----                   | KTCEWDRVKWNHSYCC        | 3286                        |
| CANARY       | IHSMIKSCKFNMKMKMIESARKQNSFAVAKLLKDLRKEA----                   | RWREDWLVWRWNYAYCR       | 3291                        |
| OSTRICH      | ISSMIRSCKFNMKMKMIESARKQNSFVAKLLKYLHREA----                    | KTREDWLVWRWNYAYCR       | 3261                        |
| GECKO        | IHSMIRNCKFMSKMKMIESARKQNSFVAIKLLKDLHRDS----                   | KTREDWLVWRWNHSYCR       | 3301                        |
| TURTLE       | IHSMIRSCKFNMKMKMIESARKQNSFVAMKLLKDLHRES----                   | KTREDWLLRWNHYSYCR       | 3300                        |
| ALLIGATOR    | IHSMIRSCKFNLKMKMIESARKQNSFAVAKLLKDLKRES----                   | KTRDSWLVRWNHSYCH        | 3258                        |
| PLATYPUS     | IYSMIESCKFMSKMKMIESARSONNFRVAMKLLKDLHRES----                  | KTDDWLVWRWNHNYCR        | 3290                        |
| TASDEVIL     | IYSMIRSCKFMSKMKMIESARKQNNFSVAMKLLKDLHRES----                  | KTREDWLVKWNHSYCR        | 3294                        |
| <b>HUMAN</b> | <b>ISSLIRSCKFMSKMKMIDSARKQNNFSLAMKLLKELHKES----</b>           | <b>KTRDDWLVSWVQSYCR</b> | <b>3282</b>                 |
| MOUSE        | VRCMLQSCRFTMKMKMIESAWKQSNFSLSMKLLKEMHKES----                  | KTREIWRVQWLHSYSQ        | 3282                        |
| CRASSO2      | -EDLFLASKIHLRLKMDSSCHKRNHKLALNLIADIHKNYRD--KENEILNLEWSHLYAK   |                         | 3255                        |
| POMACEA      | -SSIFEDIKLRQQLKLAHSCQEQNNFNLTLRILKETYKCKR--EKSELLVVEWSHLYAT   |                         | 3264                        |
| TRICHOPLAX   | LKKRIAEEVSLYLKLDARTARLQSNYPVAIKHLRQTLYHINQELDKDELLTVKWTHTIYTK |                         | 3279                        |
| NEMATOSTELLA | LRERITREEVALQKMQAAREQSNFPVAHRYLRESLSKIED-----                 | NLHVKWTHTAYAV           | 3264                        |
| PRIAPULA     | -SDPFLEQKFNLFQVQSAMQQRNPQVALKHLRTTNQLLK--KLDSDSLAVQWTHSYVR    |                         | 3303                        |
| SOFTCORAL    | LEEIFLRERVLFSLRLSEVATGQVNFVAKKQLQSSHLIRDRKNDSELEVLWTHSYGD     |                         | 3297                        |
| PISTILLATA   | IKDKFFKQEVLEKLCMANAAKEQGNVAVAHRCLEALYKI---                    | PQGNENLNISWSHTYAE       | 3314                        |
| HEMICHOR     | MVNAISKDKLLMELKLVDSVSQNNFVGAEKYLRKNCADA----                   | RDDAWRLIWTLSYAR         | 3303                        |
| BELCHER      | FSHRAQREQFLRLVLADSAREQANFPVALKHLKNTLKDF----                   | TEDDPLRLRWTHCYAR        | 3315                        |
| STRONG       | FDDLVRREKVLMSKMDASACQANFCVAAKHLKSTHRGL----                    | VEFEDLRPAWTHSYVS        | 3313                        |
| STARFISH     | LEKRILRERLWLELKMADSACQGNFVAQKHLKATHGSL----                    | SAHEDLKPWTHSYVQ         | 3328                        |

: . \*

Supplementary Figure 9: Clustal Omega: DNA-PKcs alignment metazoan plus "putative archaeon"

|              |                                                                           | <b>RYG70459.1</b> |
|--------------|---------------------------------------------------------------------------|-------------------|
| ARCHAEON     | SGRRAGLTIEEVQVVTFYNRASILEQVEFNKVEEL <sup>L</sup> TKTKKMLDMKDDSLR----KAQAE | 3734              |
| MUDCRAB      | TNIQRGRS-----R-PQNRLQYLVEAWVKFLGKVTS-----MPVLEQ                           | 3266              |
| SCORPION     | IDLKAKN-----QNYPEQLDTLL-CAHKQLAKLDL-----HFPKK                             | 3311              |
| SPONGE       | VRLDRIHQ-----DPSPTDMEAVI-SLTCQMDNFKGRLGGSGKGAIS-                          | 3341              |
| CAPITELLA    | ANKRKCAS-----GSEPSERLNLLV-EVKKRLDKCSE-----SSTLKL                          | 3286              |
| DANIO        | FTHKRIAR-----LGPSEKINALL-KTVPLLK-DAE-----RQSEAL                           | 3316              |
| MILII        | LSHRRSQR-----QARPEQVVTVL-KSIPLLV-EIN-----VDYLNNT                          | 3336              |
| BAMBOO       | FSHKRSRS-----MKRAEQIVTVM-KTIPLLG-EID-----VGNLNI                           | 3326              |
| XENOPUS      | YSHRSRSD-----LTCSEQILTAL-KTIPLLE-ESK-----TEYLTK                           | 3339              |
| STERLET      | FSHTRSHT-----QSSSEQILTVL-KTIPLLE-ERK-----IDYTKA                           | 3340              |
| GAR          | FKHLYSQA-----QSAEQILNVL-KTVDVLE-DSK-----TDPEKE                            | 3337              |
| LATIMERIA    | FGHSRSQS-----QSCPERIQVTM-KTISLLE-ESK-----ADYLNK                           | 3334              |
| CAECIL       | YTHRSRSQS-----QTSPDQVLSVI-KTVSLLLE-ETK-----ADYLRE                         | 3337              |
| SNAKE        | FSHSRSRS-----QNAEQILTVL-KTVFLLD-EIK-----LSSVSN                            | 3321              |
| CANARY       | FTHSSRN-----LSCPPEVLSVL-KTISLLE-DTK-----SDYLSK                            | 3326              |
| ONSTRICH     | FTHSCSRN-----QSCPERVCSVL-KTISLLE-DTK-----SDYLSK                           | 3296              |
| GECKO        | FSHSRSRS-----QSNPEQILTVL-KTVSLLD-EAS-----SGTLSK                           | 3336              |
| TURTLE       | FSHSRSQS-----QNSPEQMLTVL-KTISLLD-ESK-----SDYLSK                           | 3335              |
| ALLIGATOR    | VSHSSCQT-----QSSPQILTVL-KTVSLLD-ENV-----PDHLSK                            | 3293              |
| PLATYPUS     | CSHSRSQS-----QSSPEKILTVL-KTVSLL-DDNL-----SSYLSK                           | 3325              |
| TASDEVIL     | FSHSRCQI-----QSSSEQILTVL-KTVSLLADENL-----SSYQSR                           | 3330              |
| <b>HUMAN</b> | <b>LSHCRSRS-----QGCSEQVLTVL-KTVSLLDENNV-----SSYLSK</b>                    | <b>3318</b>       |
| MOUSE        | LNHCRSHT-----QSPREQVLTNL-KTITLLDESDI-----SNYLNK                           | 3318              |
| CRASSO2      | THQLSAMSA-----DTDWTNDIFSSVI-TTIDRLGKFKD-----SSLFER                        | 3294              |
| POMACEA      | THQKALSC-----SGIWSKDMLYNVL-STLDPLSKVAE-----SKMLRE                         | 3303              |
| TRICHOPLAX   | VHCDKSL-----TPPDERLKTLL-TANSQFEKVKD-----LSVILE                            | 3315              |
| NEMATOSTELLA | TQQKAHG-----LMAIDAVQTAL-STVSKLGKP-S-----INTLAN                            | 3299              |
| PRIAPULA     | TWQQIATGH-----Q-RDSADRLHRLD-DTIKELDKHAG-----KAVLHQ                        | 3341              |
| SOFTCORAL    | LNCKKCPN-----LLPSEAVDTAI-SALDQLDKIKD-----SKVLQE                           | 3333              |
| PISTILLATA   | VHFRKIQT-----LTAVGAVETAL-LVAGQLDKFSA-----SKILEI                           | 3350              |
| HEMICHOR     | LHQKCLT-----LPPSKRVINLL-TTLDQLGMFTE-----G----C                            | 3335              |
| BELCHER      | LHQKASL-----LTGADKLNVL-TTFEQDKFSS-----CRVFEE                              | 3351              |
| STRONG       | MTQRKALL-----LKPYERITSLD-KALDHLGKLPV-----SHNLGS                           | 3349              |
| STARFISH     | MNQKILT-----IELKEQVMTLL-TTFDPLAKLSN-----TPALTG                            | 3364              |

. : :

Supplementary Figure 9: Clustal Omega: DNA-PKcs alignment metazoan plus "putative archaeon"

|              |                                                                 | <b>RYG70459.1</b> |
|--------------|-----------------------------------------------------------------|-------------------|
| ARCHAEON     | NLVAFKNSKLGLEDIVQRIYGDLLVLAKDMSARYPNARSPETSVGAL--DKYTRSVMLI     | 3792              |
| MUDCRAB      | DATIETEYLKLE-----SSLCVEISEAMKDMGNSWQED-----DKYIKSL              | 3306              |
| SCORPION     | LDVSTMNHYLLQ-----SEIEMAADIVKYNDVH-----AEKIQEL                   | 3347              |
| SPONGE       | SKPFISQHHVLL-----GKLLNKMAEIFATPEDGMLAL---SALSNDGNTKLNSLI        | 3389              |
| CAPITELLA    | NAALLCDQHLLQ-----GEHLVTMATILQNQVKDIDAL-----DQKLEKITES           | 3330              |
| DANIO        | SARMLRDQRILL-----GTTYDLMAGAADRSPFALETL-----GEEKVQKILQL          | 3360              |
| MILII        | HTRILRDQNTLL-----GSSYCILADALNKEPTCLQRI-----KEDQAERVIEH          | 3380              |
| BAMBOO       | QRHAFRDQNTLL-----GTTYIMANALNKDPSCLOYI-----EERAKNVKKL            | 3370              |
| XENOPUS      | NTKACRYQNMLL-----GDTYRIMADAVCKEPCLYKI-----EDGKAGKVKDL           | 3383              |
| STERLET      | TTRIVRDQNILL-----GTTYHIMANALTRDGLALEHI-----GEDKAGKVLDL          | 3384              |
| GAR          | TAQFRNQKLLL-----GTTYHIMASAVSRDPSVLEKI-----GPEKAGRVLKL           | 3381              |
| LATIMERIA    | NTRALRDQNILL-----GTTYNI IANALNKTPTSLODI-----GEEKARKIQDL         | 3378              |
| CAECIL       | NTREFRNQNLLL-----GTTYSI IANALCKDPRCLQRI-----DKNKADKVLQL         | 3381              |
| SNAKE        | NAITFRNQNLLL-----GTFHIMANALSKERSCLNQI-----GEEKARKVFML           | 3365              |
| CANARY       | NIMAFRNQNLLL-----GTTYQIMANALSQDPRCLEQI-----EKEKARKISLI          | 3370              |
| OSTRICH      | KVTAFRNQNLLL-----GTTYRIMADALSHDPRCLEQI-----EEEKARKVSVL          | 3340              |
| GECKO        | DRLAFRNQNLLL-----GTFHIMANALSKDPRCLEQI-----VEEKARKVVLV           | 3380              |
| TURTLE       | NIVAFRNQNLLL-----GTTYHILASALSKDPCLEKI-----EEEKARKVVML           | 3379              |
| ALLIGATOR    | NIEILRNQNLLL-----GTTYRIMAVALS KDPRCLVEL-----EEDKVRKVSML         | 3337              |
| PLATYPUS     | NIVASRNQKLLL-----GTTYRIMANALSKEPASLEQI-----ERNKARKVMEL          | 3369              |
| TASDEVIL     | NSLAFRNQNILL-----GITYNIIANALSNEPTCLAQI-----EESKAKKVLEL          | 3374              |
| <b>HUMAN</b> | <b>NILAFRDQNILL-----GTTYRI IANALSSEPACLA EI-----EEDKARRILEL</b> | <b>3362</b>       |
| MOUSE        | NIQASCDQSILL-----GTTCRIMADALSREPACLSL-----EENKVNSILTL           | 3362              |
| CRASSO2      | EAGLGRRHVLL-----GQAFGLLVKGVQSENCFSSL-----SDKN-SEKIMGI           | 3337              |
| POMACEA      | KPALGMRHMILE-----SRTFDVAVTGLMSVGNLEEL-----GDKT-CEKLQOY          | 3346              |
| TRICHOPLAX   | NTTLMREHLLLR-----SRLLDMTSKILAESDASIL-----DLLNEKESLYQLA          | 3360              |
| NEMATOSTELLA | DPVIALRHHILR-----SRCFDILTDAIAGAGRSTLATYKLI CLINQPVDKSYCPC       | 3350              |
| PRIAPULA     | QRGLARENLLLK-----GRSIEAVAREVLTRPASLHTLP-----A-AT-REKLSLV        | 3385              |
| SOFTCORAL    | NASTGIRHLLK-----SRNLDAITNVLSIPGTW--DSL-----EKEAKEKLHGLC         | 3377              |
| PISTILLATA   | EPLRGIQHILR-----SKTFDILCKAML DGGVVIATLE-----SQAKN-ALVKLC        | 3395              |
| HEMICHOR     | EPSYRKQHEILS-----GRSCHLVAQTIQEAGDDIFDVI-----HLKCRKS-----        | 3376              |
| BELCHER      | DLAVAKQHHTLT-----SLSYEIVAHALIQEGGAILTGL-----KDTRHAQLLTAA        | 3397              |
| STRONG       | DLFLLCDHRILT-----SKTYQSMASALQEEKGEMLTR-----SDAGKLDKLLSK         | 3395              |
| STARFISH     | DYCLTRHHHTLT-----SKSYDLVAIAIQKGGADILTGL-----RNVGKLDKLLGL        | 3410              |

Supplementary Figure 9: Clustal Omega: DNA-PKcs alignment metazoan plus "putative archaeon"

|              |                                                                   | <b>RYG70459.1</b> |
|--------------|-------------------------------------------------------------------|-------------------|
| ARCHAEON     | EETATIEDMQREAIIVSLREKSYTCLARHSLQMLAKYKA-----NELD-GAAGKDLVSV       | 3845              |
| MUDCRAB      | AEK-FPNAKDKSSWYKELLCSSYKSLKSAVNCGEEKFQMLNN--LYEGAHSHSKDIYMTL      | 3363              |
| SCORPION     | TDT-F-SIQSKSKLEIDLFCCKNYEYKCAIDIIQEVEQK-----MIEFDQATIGETYFKF      | 3400              |
| SPONGE       | GGT---PSTSTKAISEGLWIQALSSFNAGVRSGLTTLNP-----LTKDPVPTVQSLEEL       | 3439              |
| CAPITELLA    | VGS---PALSHQEIVASLHEAAYNSFKSGVGVAAASQPES-----VCVNKAYMSL           | 3376              |
| DANIO        | SQA---S--SIAQVVEGLQIQALELLRSAACKAEEEEQSFSSQ---QHVNTHGIVEAYMTM     | 3412              |
| MILII        | SGS---SSEEIQEVVIGLHRKTLHYLERAVRKAEEEVQSLAG---EHVDIAGVIEAYVNL      | 3434              |
| BAMBOO       | SGA---TSDNPVQVSIGLYRKAHEYLQSAVKKAEEEVQSLSE---EHVDTVGVIKAYMTL      | 3424              |
| XENOPUS      | S-----ESPENVVGGLYRKSLEYFTNAVRKATEEEQSHST---DQIDVRGIIKAYMTL        | 3433              |
| STERLET      | LGT---TSDNLEQVVVGLHRKALQHLQNAVKKAEELQSRST---EHIDIPGAIEAYMTL       | 3438              |
| GAR          | SGA---SSSNPQQVTAGFHKRALGLMQSAVKKVEDEVQSRSA---DHVDTAGAI EAHMTL     | 3435              |
| LATIMERIA    | SGA---QSDHPEQIVISLYRKALSYLQTAACKAEEQVQSRST---EHIDVAGVIEAYMTL      | 3432              |
| CAECIL       | SGT---MSENPDVAASLFKKSFHLYLDSAVKKAEEEVQSRAM---ENVDTTGVIKAYMTL      | 3435              |
| SNAKE        | SEE---RSDNVEKVIAGLNKRAFLCFSGAVKKAEEEVQSMSF---DHIDISGIIDAYMTL      | 3419              |
| CANARY       | SGE---SLENPKKVLAGLNKKAFCQFCFAVRKTEEEVQSSSV---DHVDMVGVVDAYLTL      | 3424              |
| ONSTRICH     | SGE---SLESPEKVLAGLNKRAFQCFSSAVRKEEEVQSHSM---EHVDVAGVIDSYMTL       | 3394              |
| GECKO        | SGE---KTDDIGKVIAGLNTRAFQCFSSAVRKAEEEIQSLSF---DHINTKSIIDAYMIL      | 3434              |
| TURTLE       | SGE---RPENSEKVIAGLNKKAFCQYFSTAVRKAEEEVQSHSM---EHVDLTGVIDAYMIL     | 3433              |
| ALLIGATOR    | SGE---KPDSPKVIASLNKQAFQYFSNAVRKAEEEMQSRM---EHVNLTGVIDAYLTL        | 3391              |
| PLATYPUS     | SGA---SFDNVQKVIAGLHRRAFQYLTHAVRKAEEEEEQSHSS---EHVDTGGVIDTYMTL     | 3423              |
| TASDEVIL     | SGA---SSEDAEMVIGGLHKKAFECFLKAARRAEDEVQSHST---EHVDIAGVIDAYMTL      | 3428              |
| <b>HUMAN</b> | <b>SGS---SSEDEKVIAGLYQRAFQHLSEAVQAEEEAQPPSW---SCGPAAGVIDAYMTL</b> | <b>3416</b>       |
| MOUSE        | SGS---NAENTETVITGLYQRAFHHLSKAVQSAEEETQLSCW---GHEAAAERAHAYMTL      | 3416              |
| CRASSO2      | SKA---SKLNPRELARCLVEEGYNQMRKSLSYDGRG-----TRTCRYGLEEAYLAL          | 3385              |
| POMACEA      | TK----SPLNKGDLIKELIHHGYESLRKVI SEVPEDS-----SRDAVCLQODVQLAL        | 3394              |
| TRICHOPLAX   | NVN---QHDSKEKIAAKLTSHACQALHQAV-----KAS-----KEERGGSSYIEAMMM        | 3406              |
| NEMATOSTELLA | NVC---LQ-----IVSQLITRSFTSLQEANKAAKQAATS-----SSDGSTTCMVEAMMM       | 3397              |
| PRIAPULA     | AGA---REHDHTALVSGLISAGFRELRVAVDVGDEEESSASL-----ASSPSAAHVAM        | 3435              |
| SOFTCORAL    | SSK---NPEQLDKILGHLTTKSFTTLQRAIKIAQTNENN-----QKNAESVRNLVTSSMTM     | 3430              |
| PISTILLATA   | RID---ETESQKKVSDLMTRS FVSLQSAIKAAKNAEGK-----CNTTQTSGLTVDAMIAM     | 3447              |
| HEMICHOR     | --L---RSLIEALIVNGLQNKAEHYFKKGVKLASDEEDA-----IDMDREGVIDAYVSM       | 3425              |
| BELCHER      | GVS---PDTSVDQTISSLLQKGHACLQKAVKLASDEEKA---RQDTSLDKSGIVDAFMAM      | 3451              |
| STRONG       | AEC---QESKPEKVCQSLFMKSKYLDDAVGTIKLDPASHSLSSAKREEQSMakahMAL        | 3452              |
| STARFISH     | VGQ---NATRPEQICSTLYSKAYSELKQAVSLADKDDA-----VTSQSERSMTEAYMAL       | 3461              |

:

.

Supplementary Figure 9: Clustal Omega: DNA-PKcs alignment metazoan plus "putative archaeon"

|              |                                                                                                                                                                                                                                                                                                | <b>RYG70459.1</b> |
|--------------|------------------------------------------------------------------------------------------------------------------------------------------------------------------------------------------------------------------------------------------------------------------------------------------------|-------------------|
| ARCHAEON     | TAR <b>CQ</b> QV <b>L</b> FDRAGVFAASN-----VAP <b>E</b> MLAHIVIESM <b>I</b> K <b>G</b> LSLQ <b>S</b> S <b>F</b> CM <b>E</b> R <b>V</b> L                                                                                                                                                        | 3894              |
| MUDCRAB      | AKY <b>C</b> ED <b>C</b> LE <b>K</b> WKESID-----VSDYADSLVMS <b>V</b> LR <b>A</b> MSLGS <b>R</b> E <b>A</b> H <b>F</b> H <b>F</b> FP                                                                                                                                                            | 3407              |
| SCORPION     | ANY <b>C</b> N <b>K</b> I <b>L</b> RMQEEEE <b>E</b> KTLS-----LS <b>F</b> ETYP <b>S</b> VL <b>T</b> NSL <b>N</b> AL <b>K</b> NG <b>N</b> L <b>N</b> AI <b>K</b> L <b>F</b> FP                                                                                                                   | 3449              |
| SPONGE       | FG <b>F</b> CD <b>N</b> AL <b>R</b> QEDHDDEQ <b>S</b> T-----GLDT <b>K</b> S <b>F</b> PS <b>I</b> I <b>N</b> H <b>T</b> L <b>T</b> AM <b>S</b> LG <b>S</b> SK <b>A</b> RE <b>L</b> FP                                                                                                           | 3489              |
| CAPITELLA    | V <b>H</b> F <b>C</b> DQ <b>V</b> L <b>R</b> QRENDEI <b>S</b> GT-----K <b>C</b> E <b>S</b> EED <b>F</b> PLAL <b>V</b> T <b>S</b> LS <b>L</b> AM <b>K</b> NS <b>S</b> K <b>D</b> AR <b>Q</b> L <b>F</b> FP                                                                                      | 3427              |
| DANIO        | AN <b>F</b> CD <b>R</b> RL <b>R</b> ESE <b>Q</b> K <b>E</b> EAI-----SS <b>K</b> L <b>Q</b> SL <b>P</b> EH <b>V</b> V <b>K</b> MM <b>L</b> K <b>A</b> L <b>K</b> LS <b>S</b> E <b>E</b> AR <b>L</b> K <b>F</b> FP                                                                               | 3461              |
| MILII        | AN <b>F</b> CD <b>R</b> CL <b>R</b> E <b>K</b> EES <b>A</b> TAIN-----F <b>S</b> E <b>Q</b> Q <b>T</b> FPAC <b>V</b> VE <b>K</b> IL <b>K</b> AM <b>K</b> Y <b>N</b> S <b>K</b> E <b>A</b> R <b>L</b> K <b>F</b> FP                                                                              | 3484              |
| BAMBOO       | AN <b>F</b> CD <b>R</b> CL <b>R</b> EEEE <b>E</b> SEN <b>I</b> NN-----F <b>P</b> EL <b>Q</b> T <b>Y</b> PAS <b>V</b> VEN <b>M</b> L <b>K</b> AL <b>Q</b> Y <b>N</b> S <b>R</b> E <b>A</b> R <b>L</b> R <b>F</b> FP                                                                             | 3474              |
| XENOPUS      | V <b>D</b> F <b>C</b> D <b>S</b> HL <b>R</b> K <b>V</b> EEEE <b>S</b> AV <b>M</b> D-----R <b>A</b> D <b>Y</b> Q <b>N</b> FP <b>E</b> IM <b>V</b> E <b>K</b> M <b>I</b> K <b>A</b> L <b>K</b> L <b>N</b> S <b>S</b> E <b>A</b> R <b>L</b> K <b>F</b> FP                                         | 3483              |
| STERLET      | V <b>N</b> F <b>C</b> D <b>K</b> RL <b>R</b> EEEE <b>S</b> AE <b>V</b> ST-----F <b>S</b> EL <b>P</b> TF <b>P</b> AV <b>V</b> VD <b>T</b> M <b>L</b> K <b>A</b> L <b>K</b> L <b>N</b> S <b>S</b> E <b>A</b> R <b>L</b> K <b>F</b> FP                                                            | 3488              |
| GAR          | AN <b>F</b> CD <b>K</b> RL <b>R</b> EEEE <b>E</b> NDQ <b>V</b> SE-----F <b>S</b> EL <b>P</b> TF <b>P</b> AI <b>V</b> VE <b>Q</b> V <b>L</b> K <b>A</b> L <b>K</b> L <b>N</b> S <b>S</b> E <b>A</b> R <b>L</b> K <b>F</b> FP                                                                    | 3485              |
| LATIMERIA    | V <b>D</b> F <b>C</b> D <b>K</b> RL <b>R</b> EV <b>E</b> ESAE <b>V</b> SH-----F <b>S</b> EL <b>Q</b> TF <b>P</b> AV <b>V</b> EN <b>L</b> L <b>R</b> AL <b>K</b> L <b>N</b> S <b>R</b> E <b>A</b> R <b>L</b> K <b>F</b> FP                                                                      | 3482              |
| CAECIL       | V <b>D</b> F <b>C</b> D <b>T</b> HL <b>L</b> K <b>K</b> ED <b>T</b> T <b>A</b> VID-----H <b>S</b> HL <b>Q</b> Q <b>F</b> PT <b>I</b> V <b>V</b> E <b>K</b> M <b>I</b> K <b>S</b> L <b>K</b> L <b>N</b> SK <b>D</b> AR <b>L</b> K <b>F</b> FP                                                   | 3485              |
| SNAKE        | AN <b>F</b> CD <b>S</b> HL <b>R</b> K <b>E</b> E <b>Q</b> NS <b>A</b> DV <b>N</b> -----N <b>E</b> D <b>L</b> Q <b>I</b> FP <b>A</b> IV <b>V</b> E <b>K</b> V <b>I</b> K <b>A</b> L <b>K</b> L <b>N</b> S <b>N</b> E <b>A</b> R <b>L</b> K <b>F</b> FP                                          | 3469              |
| CANARY       | I <b>S</b> F <b>C</b> D <b>Q</b> Y <b>L</b> R <b>R</b> EE <b>E</b> GL <b>E</b> IN-----T <b>V</b> DL <b>Q</b> FP <b>A</b> IV <b>V</b> E <b>K</b> M <b>I</b> K <b>A</b> L <b>K</b> L <b>N</b> S <b>R</b> E <b>A</b> R <b>L</b> R <b>F</b> FP                                                     | 3474              |
| OSTRICH      | V <b>G</b> F <b>C</b> D <b>Q</b> HL <b>R</b> EE <b>E</b> GL <b>L</b> EIN-----T <b>A</b> DL <b>Q</b> L <b>F</b> PA <b>I</b> V <b>V</b> E <b>K</b> M <b>I</b> K <b>A</b> L <b>K</b> L <b>N</b> S <b>R</b> E <b>A</b> R <b>L</b> R <b>F</b> FP                                                    | 3444              |
| GECKO        | AN <b>F</b> CD <b>T</b> HL <b>R</b> K <b>K</b> EE <b>G</b> S <b>A</b> DIN-----A <b>V</b> DL <b>Q</b> M <b>F</b> PA <b>I</b> V <b>V</b> E <b>K</b> V <b>I</b> K <b>A</b> L <b>K</b> L <b>D</b> S <b>K</b> E <b>A</b> R <b>L</b> K <b>F</b> FP                                                   | 3484              |
| TURTLE       | V <b>D</b> F <b>C</b> D <b>K</b> HL <b>R</b> K <b>E</b> EE <b>G</b> SS <b>D</b> V <b>S</b> -----A <b>L</b> DL <b>Q</b> TF <b>P</b> AI <b>V</b> VE <b>K</b> M <b>I</b> K <b>A</b> L <b>K</b> L <b>N</b> S <b>R</b> D <b>A</b> R <b>L</b> K <b>F</b> FP                                          | 3483              |
| ALLIGATOR    | V <b>D</b> F <b>C</b> D <b>K</b> HL <b>H</b> K <b>E</b> RE <b>G</b> LS <b>D</b> IS-----A <b>V</b> DL <b>Q</b> TF <b>P</b> T <b>I</b> V <b>V</b> E <b>K</b> M <b>I</b> K <b>A</b> L <b>K</b> L <b>N</b> S <b>R</b> E <b>A</b> R <b>L</b> K <b>F</b> FP                                          | 3441              |
| PLATYPUS     | V <b>D</b> F <b>C</b> D <b>K</b> HL <b>R</b> NE <b>E</b> EG <b>T</b> S <b>V</b> ID-----A <b>V</b> VL <b>Q</b> AY <b>P</b> AL <b>V</b> VE <b>K</b> M <b>M</b> K <b>A</b> L <b>K</b> L <b>N</b> S <b>R</b> E <b>A</b> R <b>L</b> K <b>F</b> FP                                                   | 3473              |
| TASDEVIL     | V <b>D</b> F <b>C</b> D <b>R</b> HL <b>R</b> K <b>E</b> EE <b>S</b> T <b>S</b> VIH-----T <b>V</b> EL <b>Q</b> T <b>Y</b> PAL <b>V</b> VD <b>K</b> M <b>L</b> K <b>A</b> L <b>K</b> L <b>N</b> S <b>K</b> E <b>A</b> R <b>L</b> K <b>F</b> FP                                                   | 3478              |
| <b>HUMAN</b> | <b>AD</b> F <b>C</b> D <b>Q</b> Q <b>L</b> R <b>K</b> EE <b>E</b> N <b>A</b> S <b>V</b> ID-----S <b>A</b> EL <b>Q</b> AY <b>P</b> AL <b>V</b> VE <b>K</b> M <b>L</b> K <b>A</b> L <b>K</b> L <b>N</b> S <b>N</b> E <b>A</b> R <b>L</b> K <b>F</b> FP                                           | <b>3466</b>       |
| MOUSE        | V <b>G</b> F <b>C</b> D <b>Q</b> Q <b>L</b> R <b>K</b> VE <b>E</b> S <b>A</b> S <b>Q</b> KT-----S <b>A</b> EM <b>E</b> AY <b>P</b> AL <b>V</b> VE <b>K</b> M <b>L</b> R <b>A</b> L <b>K</b> L <b>N</b> S <b>S</b> E <b>A</b> R <b>L</b> K <b>F</b> FP                                          | 3466              |
| CRASSO2      | A <b>Q</b> Y <b>C</b> N <b>K</b> F <b>L</b> R <b>M</b> AED <b>D</b> T <b>D</b> K <b>E</b> SL <b>N</b> LS-----K <b>E</b> C <b>Q</b> K <b>N</b> FP <b>E</b> T <b>I</b> T <b>V</b> CL <b>L</b> N <b>A</b> M <b>K</b> L <b>D</b> S <b>M</b> E <b>A</b> R <b>Q</b> R <b>F</b> FP                    | 3439              |
| POMACEA      | AKY <b>C</b> D <b>K</b> Y <b>L</b> R <b>L</b> AE <b>E</b> ND <b>G</b> L----VA-----S <b>E</b> S <b>M</b> E <b>V</b> FP <b>A</b> T <b>A</b> V <b>K</b> CL <b>D</b> AM <b>R</b> AG <b>S</b> AE <b>A</b> L <b>E</b> R <b>F</b> FP                                                                  | 3444              |
| TRICHOPLAX   | V <b>N</b> F <b>C</b> D <b>D</b> IL <b>R</b> HE <b>E</b> D <b>G</b> RAN <b>Q</b> ----PK <b>G</b> L---ID <b>T</b> K <b>I</b> F <b>P</b> E <b>V</b> I <b>I</b> R <b>Y</b> T <b>L</b> E <b>A</b> M <b>A</b> Y <b>N</b> S <b>M</b> D <b>A</b> R <b>Q</b> R <b>F</b> FP                             | 3458              |
| NEMATOSTELLA | V <b>P</b> F <b>C</b> D <b>R</b> AL <b>R</b> R <b>K</b> E <b>D</b> ES <b>D</b> GPS <b>F</b> I <b>I</b> SP <b>F</b> GL <b>H</b> Y <b>E</b> F <b>V</b> F <b>Q</b> R <b>F</b> PE <b>F</b> V <b>V</b> RY <b>V</b> L <b>K</b> AM <b>E</b> H <b>G</b> S <b>E</b> E <b>A</b> R <b>N</b> R <b>F</b> FP | 3457              |
| PRIAPULA     | AS <b>Y</b> CD <b>Y</b> F <b>L</b> R <b>V</b> RE <b>D</b> D <b>G</b> T <b>T</b> V-----L <b>P</b> TD <b>G</b> Y <b>A</b> ET <b>V</b> I <b>T</b> SL <b>L</b> R <b>A</b> M <b>A</b> L <b>G</b> S <b>S</b> E <b>A</b> R <b>D</b> S <b>F</b> FP                                                     | 3483              |
| SOFTCORAL    | AN <b>F</b> CD <b>R</b> L <b>L</b> R <b>M</b> K <b>E</b> ED <b>S</b> E <b>Q</b> TP-----R <b>L</b> DM <b>K</b> L <b>F</b> PG <b>I</b> V <b>I</b> R <b>F</b> V <b>L</b> K <b>S</b> M <b>A</b> F <b>E</b> S <b>A</b> E <b>A</b> R <b>Q</b> K <b>F</b> FP                                          | 3480              |
| PISTILLATA   | V <b>N</b> F <b>C</b> D <b>N</b> CL <b>R</b> K <b>K</b> EV <b>S</b> V <b>A</b> P <b>V</b> E-----V <b>D</b> TK <b>L</b> FP <b>G</b> I <b>V</b> RY <b>M</b> L <b>K</b> S <b>M</b> C <b>Y</b> S <b>S</b> K <b>E</b> A <b>R</b> Q <b>K</b> FP                                                      | 3496              |
| HEMICHOR     | AT <b>F</b> CD <b>K</b> ML <b>K</b> Q <b>Q</b> E <b>Q</b> NE <b>D</b> G <b>A</b> V-----S <b>R</b> SS <b>K</b> SP <b>S</b> FP <b>R</b> SV <b>V</b> F <b>H</b> LL <b>K</b> AL <b>K</b> L <b>N</b> S <b>V</b> E <b>A</b> I <b>Q</b> R <b>F</b> FP                                                 | 3477              |
| BELCHER      | V <b>G</b> F <b>C</b> D <b>K</b> IL <b>R</b> H <b>Q</b> ED <b>D</b> EE <b>G</b> T <b>E</b> -----L <b>S</b> S <b>I</b> P <b>L</b> AA <b>A</b> V <b>V</b> SN <b>L</b> L <b>Q</b> AL <b>R</b> H <b>D</b> S <b>P</b> E <b>A</b> R <b>Q</b> R <b>F</b> FP                                           | 3501              |
| STRONG       | V <b>S</b> F <b>C</b> D <b>Q</b> L <b>L</b> R <b>Q</b> Q <b>D</b> DD <b>C</b> NP <b>D</b> -----Y <b>L</b> PL <b>M</b> E <b>A</b> Y <b>P</b> ST <b>V</b> V <b>N</b> ST <b>L</b> Q <b>A</b> M <b>N</b> L <b>N</b> S <b>P</b> E <b>A</b> R <b>Q</b> H <b>F</b> FP                                 | 3503              |
| STARFISH     | V <b>S</b> F <b>C</b> D <b>R</b> ML <b>R</b> L <b>K</b> ES <b>D</b> EV <b>P</b> M <b>T</b> -----Y <b>L</b> P <b>Q</b> T <b>D</b> N <b>F</b> S <b>Q</b> T <b>V</b> V <b>H</b> Y <b>T</b> L <b>K</b> A <b>M</b> H <b>Y</b> S <b>S</b> Q <b>E</b> A <b>R</b> Q <b>R</b> F <b>F</b>                | 3512              |
|              | * : *                                                                                                                                                                                                                                                                                          | : . : . . .       |

Supplementary Figure 9: Clustal Omega: DNA-PKcs alignment metazoan plus “putative archaeon”

|              |                                                                     | <b>RYG70459.1</b> |
|--------------|---------------------------------------------------------------------|-------------------|
| ARCHAEON     | VLFNLI TEHTQHVSQVTFGRSRSGYLEQLLQI PAWCYLRFS AQLMGS LDLSCGDVVYPI     | 3954              |
| MUDCRAB      | RVINLMSDDSS-----LVATFKKEAKKV VVMFL LWISHILIIY VDKLSGEALQPI          | 3457              |
| SCORPION     | RLLQIIIEVYPD-----TIPEFIAKSKV VPCWML SWINQLLTL LDKPEATAVQYI          | 3499              |
| SPONGE       | RLLQLVEAHPD-----TMDLMINKSSTI PCWMI F I GWINQMIAL VDKPESRAVHDI       | 3539              |
| CAPITELLA    | RLLQIIERFPQ-----TREV FIRKSRDI PAWMFL GWVSQICAI LDKPESSAIHEI         | 3477              |
| DANIO        | RLLQLVEVYPAE-----TL DLMVREVVSV PCWLLI GWISQMMAL LDKPQATAVQHV        | 3512              |
| MILII        | RLLQIVKLYSAE-----TL DLMKKEVSSV PCWQFI GWINQMMAE LDKKEAVVQHI         | 3535              |
| BAMBOO       | RLLQIVELYPVE-----TQDVMTRGVSTI PCWQFI GWINQMMAE LDKKEACVIQPI         | 3525              |
| XENOPUS      | RMLQIIIEQYPSE-----TL DLMARENCTV PCWQFI GWISQMMAL LDKKESIAVQHI       | 3534              |
| STERLET      | RLLQIIELYPAE-----TL DLMKEVSSV PCWQLI GWISQMMAL LDKKEAVAVQHV         | 3539              |
| GAR          | RLLQIVELYSAE-----TL DLMIKEMSSV PCWQLI GWISQMMAL LDKKEAVAVQHV        | 3536              |
| LATIMERIA    | RLLQIVELYPAE-----TL DLMKMGSSV PCWQFI GWISQMMAL LDKKEAVAVQHI         | 3533              |
| CAECIL       | RLLQIVELYPAE-----TL DLMTREVSSV PCWQFI GWISQMMAL LDKKEAVAVQHI        | 3536              |
| SNAKE        | RLLQIVEKYPEK-----IL RLMQEISSV PCWQFI GWISQMMAL LDKNEAPAVQHT         | 3520              |
| CANARY       | RLLQIIERYPAE-----TL GLVTQELSSV PCWQFI GWISQMMAL LDKDEAVAVQHT        | 3525              |
| OSTRICH      | RLLQIIERYPAE-----TL GLVTRELSSV PCWQFI GWISQMMAL LDKDEAIAVQHT        | 3495              |
| GECKO        | RLLQIVEKYPTTE-----TL GLMQEISSV PCWQFI GWISQMMAL LDKKEALAVQYT        | 3535              |
| TURTLE       | RLLQIIERYPAE-----TL GLMQEISSV PCWQFI GWISQMMAL LDKKEAVAVQHT         | 3534              |
| ALLIGATOR    | RLLQIIERYPAE-----TL SLMQEI STV PCWQFI GWISQMMAL LDKDEAVAVHHT        | 3492              |
| PLATYPUS     | RLLQIIERYPEE-----TL DLMTQEISSI PCWQFI GWISQMMAL LDKKEAVAVQHT        | 3524              |
| TASDEVIL     | RLLQIIERYPEE-----TL NLMIKEMSSI PCWQFI GWISQMMAL LDKKEAVAVQHT        | 3529              |
| <b>HUMAN</b> | <b>RLLQIIERYPEE-----TL SLMTKEISSV PCWQFI SWISHMVAL LDKDQAVAVQHS</b> | <b>3517</b>       |
| MOUSE        | RLLQIIIEQYSEE-----TL NIMTKEISSI PCWQFI GWISHMVAL LDKKEAIAVQHT       | 3517              |
| CRASSO2      | RLLQLVEMYPE-----IR STFVEKSGQV PCWMI F I MWISQMMAL LDKPEGSTVHHI      | 3489              |
| POMACEA      | RLLHIIIEHYPD-----TT DMFLKKSETI PSWMI F I LWISQMMAL LDKHQAHAVRPI     | 3494              |
| TRICHOPLAX   | RLLQIVERNPN-----TI DGMFKSSAI PSWMI F I GWISQMMAL LDKPEARAVQEI       | 3508              |
| NEMATOSTELLA | RLLQIVELYPH-----TL DSFVKKVETV PCWMI F I GWINQMVAL MDKKEARAVHGI      | 3507              |
| PRIAPULA     | RLLQLVDLYPD-----TL PLLTSKVESV PCWMI F I GWISQMMAL LDKREARAVQGI      | 3533              |
| SOFTCORAL    | RLLQLVELYPGG-----DI EAFKRKSSDV PCWMI F I GWISQMMAL LDKRESHAVQGI     | 3531              |
| PISTILLATA   | RLLQIVHKYPD-----TL EAFVKKAADV PCWMI F I GWINQMMAI LDKPEGKAVHGI      | 3546              |
| HEMICHOR     | RLLQIVETYTD-----TMDTFVELTSET PCWMI F I GWIGQMLAL LDKVESISVQGI       | 3527              |
| BELCHER      | RLLQLVEIYPD-----TMDLFIEKVSHV PSWLCI SWLGQMMAL LDKPEAVAVHGI          | 3551              |
| STRONG       | RLLQLVEKYPD-----TM QSLVKKASII PSWMI F I GWISQMMAL LDKPESLAVQGI      | 3553              |
| STARFISH     | RLLQLVEACPD-----TM QLMIKEVSDV PCWMI F I GWISQMMAL LDKPEGPAVHGI      | 3562              |
|              | ::::: * * : : : : * . :                                             |                   |



Supplementary Figure 9: Clustal Omega: DNA-PKcs alignment metazoan plus “putative archaeon”

|              |                                                                 | <b>RYG70459.1</b> |
|--------------|-----------------------------------------------------------------|-------------------|
| ARCHAEON     | LLACSHPELRFSDAVKSIDSLAKNTN-TNLTSAVKQQVLNLLDEVYTFCLSQ-----       | 4057              |
| MUDCRAB      | MSLIVVPENTLKKSFKKILLIK-----NKEDIEVALNNLVADHLKVNNRSTRG           | 3561              |
| SCORPION     | LDLSVPELLYKYEYFKEILQMKKD-----KGDKNEIVKLYKKLHELFNYNPRDKMK        | 3608              |
| SPONGE       | LEQLNSPELAWKDWDYNELKPLVGS---VTVPKRDKNAIKRVWEQMSQLLETRSGLGDK     | 3650              |
| CAPITELLA    | LEMMHEPAVI IKDWIMDMKNAKGGG---SSQSLSMAYVKERYQELYKELLCESEDGSL     | 3591              |
| DANIO        | LQQLSNPEMLFKDWWDEVKNQLDKP-----NLDKMKMLQY--MTELLGDA-----         | 3613              |
| MILII        | LEQLSNPDMLFKDWDNFRSKLEKK-----E-NKTQLKNLYSEMYSNLANA-----         | 3637              |
| BAMBOO       | LEQFSNPDLLFKDWDANFKTELEKK-----VKDKKLLKNMYDEMYSNLASL-----        | 3628              |
| XENOPUS      | LEQLSNPPMIFQDWWEDVSNELSKP-----NVNKNKIKELYKEMYTNLGNP-----        | 3637              |
| STERLET      | LQQLTNPEMLFKDWWEDVKKELEKP-----KTDKKLLKNMYEEMYSALGNP-----        | 3642              |
| GAR          | LQQLSNPEMLFKDWDLEDARNTLSKP-----KTDKKDAKKMYEEIISVLGNA-----       | 3639              |
| LATIMERIA    | LEQLTNSDMIFKDWVDDVDRNELDKP-----QRNKANLKRMYEEMYANLGNL-----       | 3636              |
| CAECIL       | LEQLSNPDMIFKDWIEDMKNELAKS-----QRNKNNIKKLYEEMYMNLGNL-----        | 3639              |
| SNAKE        | LEQLSNPAMLFKDWIGDVQNELGKT-----KKNTNNIQQLYDGMYYQNLGNL-----       | 3623              |
| CANARY       | LEQLSNPVMIFKDWAEEDVDRNELSKP-----QRNKKKLKEMYERMYKNLGNL-----      | 3628              |
| OSTRICH      | LEQLSNPMMLFKDWTEDVDRNELVKT-----QRNKNKLQDMYERMYRNLGNL-----       | 3598              |
| GECKO        | LEQLSNPVMLFKDWTDDMKNELGKT-----KRNKENILKLYDGMYYQNLGNV-----       | 3638              |
| TURTLE       | LEQLSNPVMLFKDWWEDVKNELGKT-----QRNKNNLKEMYEGMYRNLGDL-----        | 3637              |
| ALLIGATOR    | LEQLSNPEMLFKDWDVAVRNELGKA-----QKNKAKLKEMYEGMYGNLGNL-----        | 3595              |
| PLATYPUS     | LEQLSNPEMLFKDWDVEDIKIELTKT-----PINKNNLKRMYEGMYKTLGNL-----       | 3627              |
| TASDEVIL     | LEQLSNPELLFKDWDVDDVRGILMQT-----PVNKKKLEKMYEEMYAILGTL-----       | 3632              |
| <b>HUMAN</b> | <b>LDQLSNPELLFKDWSNDVRAELAKT-----PVNKKNIEKMYERMYAALGDP-----</b> | <b>3620</b>       |
| MOUSE        | LDQLSNPDLLFKDWSDTKDELGKN-----PVNKKNIEKLYERMYAALGDL-----         | 3620              |
| CRASSO2      | LEHMSQPDIQFKDWFDDTRLKFMKN-----KPDKKAMKEEYQIMYKKVLEFTETVGRG      | 3597              |
| POMACEA      | LEQFSQPVMFQDWSRDITKILE-K-----RP-AAEIKKKYKEIYDMLLEMPHKGEQS       | 3604              |
| TRICHOPLAX   | LEQLSQPDLVFKDWWDEVKGL---K-----KKSGSIAESIRICYQKLRDGLLDVNASN      | 3613              |
| NEMATOSTELLA | LEQLHNPMAFKDWCDEIKQLLQT-----KNKKAIKEAFRSIYKQLFDSSVNRATD         | 3615              |
| PRIAPULA     | LEQLSSPHMLFSDVADARPLLMTR-----RADFPARFRKIYASLFDTTTRSQEE          | 3643              |
| SOFTCORAL    | LEQLTNPEMVFKDWMDEVKVLLS-----TKGNAVKIRESYGEMSKKLLNVKKR----       | 3635              |
| PISTILLATA   | LEMLTNPEMVFRDWCEGPMKQLLED----QIKRNDSSQAVKQCFGAMFQLLMDCRKRRTKS-  | 3657              |
| HEMICHOR     | LEQLTNPEHICKDFTDDVLPALRAR-----NPTAVKKAVEGLYTRVFDSCRQSSQD        | 3636              |
| BELCHER      | LEQLSHPDQLFKDWDGDDADLKRLLKVDPKKRTKEDKVTIKRLYDEMYDSSLDFRSASQDS   | 3669              |
| STRONG       | LQRLTHPGFIFKDWISVIN-SKM-----NSKERDHPAIKQEQQLYQQLFES-----        | 3656              |
| STARFISH     | LEQLNNPEFVFKDWDADDVMKPLL-----NVAKRDKNKIRQACHEIYMNLINHRSTVTD     | 3673              |

: .

Supplementary Figure 9: Clustal Omega: DNA-PKcs alignment metazoan plus "putative archaeon"

|              |                                                               | <b>RYG70459.1</b> |
|--------------|---------------------------------------------------------------|-------------------|
| ARCHAEON     | -----SWPRIGHKIGKYNRHFAKALLPKVN---SIVGSKRESIFNKDVLGKLKE        | 4103              |
| MUDCRAB      | MAG-----EKGEVFCKVGLKLDVNVVALTK-----EFGGKMEEFKRMPV-EEIKK       | 3605              |
| SCORPION     | -----ERKLHLKVAKVCGSVVF---SEFGKDGNKLIISMP-KEASV                | 3645              |
| SPONGE       | ---SLY-----GGSPSLQKGARQKTFAQAYAKNIE---DKFGKGGAKIISMSG-TQLAS   | 3697              |
| CAPITELLA    | -----YSDSADCSMGPYRSDVFKQFISQFD---EYFGKMGSKIPGLTF-MKVLS        | 3636              |
| DANIO        | -----KSPRFGSYRRKFIQKFSKEVE---KLLGAGGSKLYERRKDKDFLQ            | 3655              |
| MILII        | -----GAPGIGAFRRRFVTFGFKKID---QHFVKDGLLLNLMN-LKAFNV            | 3678              |
| BAMBOO       | -----QFPGIGAFRTRYVQVFKKAFD---QYFGKEGSRLLDMN-IKIFDE            | 3669              |
| XENOPUS      | -----KDHFMGAFRRRFCEKYTKDFD---KAFGPEGSKLLNIK-CDGFNK            | 3678              |
| STERLET      | -----RCQGIGAFRKKFAQHFSSKEFD---KTFGKGGAKLFDK-HDAFRK            | 3683              |
| GAR          | -----KAAGIGRFRKKFVETYAKRIEIVKELGKDGSKLWDKR-KD----             | 3679              |
| LATIMERIA    | -----RAPGLGSRFNSFVKAYGKEFE---RVYVKRGEKLLDMK-SSDFFK            | 3677              |
| CAECIL       | -----KAPGIGEFRRRFVQAHAKDLD---THFGKGGSKLVDMK-EDAFK             | 3680              |
| SNAKE        | -----EAPGLGWYRKQFIKEFGKELD---IHFVKGGSKLLGMN-ASVFIK            | 3664              |
| CANARY       | -----ESPGLGMMRKRFIQAFGKDLD---HHFGRGGSELLNMK-TSDFDA            | 3669              |
| ONSTRICH     | -----EAPGLGLLRRRFIQAFGKDFD---HQFVKRGSKLLNMK-ASDFDA            | 3639              |
| GECKO        | -----HASGLGLFRKRFIKEFGKDFD---SHFVKRGSKLLDMK-ASGFNT            | 3679              |
| TURTLE       | -----QAPGLGLFRKRFVQTFGKDFS---SHFVKGGSKLLDMK-ADDFNR            | 3678              |
| ALLIGATOR    | -----QASGLGLFRRRFIQAYGKEFD---TQFVKGGSKLLDMK-DNEFIK            | 3636              |
| PLATYPUS     | -----KAPGLGAFRRRFIQAFGNEFD---HHFVKGGSKLLQMK-LSDFTS            | 3668              |
| TASDEVIL     | -----EVPGIGAFRKKFIQTYGKEFD---RHFVKRGSKLLVMK-LSDFNN            | 3673              |
| <b>HUMAN</b> | <b>-----KAPGLGAFRRRFIQTFGKEFD---KHFGKGGSKLLRMK-LSDFND</b>     | <b>3661</b>       |
| MOUSE        | -----RAPGLGPFRRRFIQAFGKEFV---KSFVNGGSKLLTMK-VDDFCK            | 3661              |
| CRASSO2      | ASQ----RSQTEETLSMVDKGYPKKFAERFKKDVD---SCFGKNGEKLLDMSF-SKLAG   | 3649              |
| POMACEA      | GTQ-----AQQTSFGAVSMGEFHRRFVFAEVFKNEFD---NHFGVDGSKLVMTA-KEFSG  | 3654              |
| TRICHOPLAX   | ESE----AASSLTSGELIEFGSHKRRFIQHFQKVFIE---QYFGKDGSKLQSMKA-SDFEK | 3665              |
| NEMATOSTELLA | SSQ-----PAAEEMGPFRKKFSKEHASRFE---NIFVKDGEKLVNMSL-KTAK-        | 3659              |
| PRIAPULA     | -----PGGRGRYWSVFTRTWAREVE---EKCGRDGSKLLAMAA-ADANQ             | 3683              |
| SOFTCORAL    | -----GTNSDGLFEGSIRRKFAQEFSGNVV---KVCGEDGSKIIDMSI-KAFES        | 3680              |
| PISTILLATA   | -----GSQTRGTESGPFRTKFAQEFANEVQ---RIFVKEGEKLVGVKM-TDFSK        | 3702              |
| HEMICHOR     | ---SLF-SESDAVTQSLPFGPFQKKFASDFVKPFQ---KRFVGERGCKILSMQHQKEFMN  | 3689              |
| BELCHER      | SMSLFGSQSSDLESQSVGFPGPFRRRFAQQFAKECE---KMFVKDGSRIIDMKE-KEFMK  | 3725              |
| STRONG       | GGR----QGGPSSSSQTVPEPGPYWKKFGREWQKRFD---SSFVKDGSKLAAMDY-KTWSK | 3708              |
| STARFISH     | GAG----SSQDSQSSPSVGFNGFRRRFAQEWQKKFE---AAFVKDGTKVVIDMQL-KTFSE | 3725              |

\* .

Supplementary Figure 9: Clustal Omega: DNA-PKcs alignment metazoan plus "putative archaeon"

|              |                                                               | <b>RYG70459.1</b> |
|--------------|---------------------------------------------------------------|-------------------|
| ARCHAEON     | LRDATQNS-----MKHTSGRVSVAEFSEWLGDFDSTTL--HILIPSEQYTIVHA        | 4149              |
| MUDCRAB      | RLNSIRTVV-----NQRRENAPNQLKAYS PWLANFQASKHSDVLEIPGQYSGVSK      | 3656              |
| SCORPION     | KYETLLKKITTT-----MSEMKEAKLRDFS DWLSEFHSIKYSEDIEIPGQYTGKRK     | 3696              |
| SPONGE       | AFNEVYNKMRES-----LNKFSSSALLKDYS PWLDTFRQEDYLQVIEVPGLYDGRSK    | 3749              |
| CAPITELLA    | WLSDKSEKV-----KKAFSNKQPRK LKEYSQWLAEFQAGNHEASLEIPGQYTGEVC     | 3687              |
| DANIO        | QVDRMVQSM-----RGFQKEPGNMKEYS PWLSSFKAETLKNELEVPGQYDGSK        | 3704              |
| MILII        | AVGQIMET-----QKPEPPGNLKEYS PWSNFKPQFLGNELEIPGQYDGKCK          | 3725              |
| BAMBOO       | ATKKILETV-----CKKQQAPPGNLKEYS PWMSEFKPEYLRNDLEIPGQYDGKSK      | 3719              |
| XENOPUS      | TVGPLITKM-----KEQQKEPGNLKEYS PWMSEFKPEFLRNELEIPGQYSGRSK       | 3727              |
| STERLET      | ASDSLWGSISEE-----QKKEKEPGNLKEYS PWSNFKPEVLRNELEIPGQYDGKCK     | 3735              |
| GAR          | --EKFWQKLTTS-----IRSMDSIALPGNLKEYS SWLSNFRPETLRNELEVPGQYDGRSK | 3732              |
| LATIMERIA    | VSDQLLTSM-----RKFQREPGNLKEYS PWSQFKPEFLRNELEIPGQYDGKSK        | 3726              |
| CAECIL       | TAYSLFNMM-----RGSQPEPGNLKEYS PWSNFKPEFLRHELEIPGQYNGRSK        | 3729              |
| SNAKE        | VANSLSEKM-----KKCEKEPGNLKECS PWMSEFKPEFLRTELEIPGQYDGKCK       | 3713              |
| CANARY       | IANSLHSM-----IKTHKEPGNLKECS PWMSEFKAEFLRSELEVPGQYDGKCK        | 3718              |
| OSTRICH      | ITSALLSKM-----TKSHKEPGNLKECS PWMSEFKAEFLRNEIEVPGQYDGKCK       | 3688              |
| GECKO        | IADSLLLKM-----KECHQEPGNLKECS PWMSEFKPEFLKHELEIPGQYDGKCK       | 3728              |
| TURTLE       | IAFSLLSKM-----KD-QKEPGNLKECS PWSDFKAEFMRNELEIPGQYDGKSK        | 3726              |
| ALLIGATOR    | IVNALLAKM-----RDGQKEPGNLKEYS PWLSEFKAEFWRNELEIPGQYDGKCK       | 3685              |
| PLATYPUS     | ITNSLNSKM-----KESSKPPGNLKECS PWLSDFRVEFLRSELEIPGQYDGKCK       | 3717              |
| TASDEVIL     | ITTTLLNKM-----REDSKPPGNLKECS PWSNFKVEFLRNELEVPGQYDGRGK        | 3722              |
| <b>HUMAN</b> | <b>ITNMLLLKM-----NKDSKPPGNLKECS PWSDFKVEFLRNELEIPGQYDGRGK</b> | <b>3710</b>       |
| MOUSE        | ITGSLLVRM-----KKDSKLPGNLKEYS PWMSEFKAQFLKNELEIPGQYDGKSK       | 3710              |
| CRASSO2      | AYKKVYKDM-----DFEVKEKNLKPANLKDYCQWLANFNPSIQGKDEIPGQYDGKCK     | 3703              |
| POMACEA      | ILRNLO--A-----QFEKHKADLTPPTNIGKYCSWMANFNPNHESRELEIPGQYDGLRK   | 3706              |
| TRICHOPLAX   | IASRLIQEI-----SGKIKRPNLKEYC PWLSNFQAANFTYSIEVPGQYTGRSK        | 3715              |
| NEMATOSTELLA | ----L--K-----QQMVSPPGNLKEYS PWLTNFDQADSHAQLEVPGQYTGQSK        | 3702              |
| PRIAPULA     | VLSALG-----KEMK---TKAADSPGNLKEYS TWLTDFFHSSPATCQIEIPGQYRGRSK  | 3733              |
| SOFTCORAL    | AMKTTNEKM-----KAKKFVGNLKDYSPWLANFQTQSETIQLEIPGQYSGQSK         | 3728              |
| PISTILLATA   | WCRDIQQKMVKF-----RNRTPPPGNLKEYS PWLSRFQSNNFTHLEIPGQYKGGTK     | 3754              |
| HEMICHOR     | FRNEVDQLMR-----KKMSAPGNLREYS PWLSDFQPINYEKELEIPGQYKGRSK       | 3739              |
| BELCHER      | LKSGLQNMMDGFYRKAFPREKANCYAPGLLKDYCPWLSDFNPLDYDRELEIPGQYTGKVK  | 3785              |
| STRONG       | LRQDI-----CAKMT-----GKDDPGNLKEYS PWFTAFQTLR-GDELEIPGQYDGSK    | 3756              |
| STARFISH     | HYGKL-----YKEMAAK---RRDPPGNLKEYS TWFSDFQQLSYDRELEIPGQYGGKSK   | 3775              |

: . \*: \* : : \* \*

Supplementary Figure 9: Clustal Omega: DNA-PKcs alignment metazoan plus "putative archaeon"

|              |                                                                                                                                                                | <b>RYG70459.1</b> |
|--------------|----------------------------------------------------------------------------------------------------------------------------------------------------------------|-------------------|
| ARCHAEON     | -TPREPEVINTIAGELLVME <b>S</b> IRK <b>P</b> KRLSLVSN <b>T</b> GVGYR <b>FLVK</b> G <b>EDLR</b> ND <b>ERIE</b> QLFGL                                              | 4208              |
| MUDCRAB      | PLPEYHVNISSFDENVMP <b>Q</b> SLRVPLR <b>I</b> VIRGSDEK <b>D</b> HKY <b>LVK</b> W <b>GEDLR</b> TD <b>Q</b> RM <b>Q</b> QVFTL                                     | 3716              |
| SCORPION     | PIPEHHVKICNFDQKVDIL <b>S</b> SLTK <b>P</b> RC <b>L</b> TIRGNDQK <b>D</b> YK <b>FLVK</b> S <b>GEDLR</b> Q <b>D</b> S <b>R</b> IEQLFDV                           | 3756              |
| SPONGE       | PLPEYHAKITRFDAKVLIL <b>S</b> SLRK <b>P</b> KRLTIIGDDTREY <b>M</b> FLVK <b>G</b> EDLRL <b>D</b> Q <b>R</b> IEQLFET                                              | 3809              |
| CAPITELLA    | PLPEYHAKISSFDSQVTVLR <b>S</b> SLR <b>M</b> PK <b>S</b> IVIRGNDEKEY <b>K</b> FLVK <b>G</b> EDLR <b>Q</b> D <b>Q</b> RVQVFNL                                     | 3747              |
| DANIO        | PLPEYHAKITGFDERVKV <b>M</b> T <b>S</b> IR <b>R</b> PK <b>R</b> IIIRGDDERD <b>Y</b> PFLVK <b>G</b> EDLR <b>Q</b> D <b>Q</b> RIEQLFGV                            | 3764              |
| MILII        | PLPEYHAKITGFDERVKV <b>M</b> <b>S</b> IR <b>K</b> PK <b>R</b> LIIRGNDEKEY <b>P</b> FLVK <b>G</b> EDLR <b>Q</b> D <b>Q</b> RIEQLFEV                              | 3785              |
| BAMBOO       | PMPEYHAQITGFDERIKV <b>M</b> <b>S</b> IR <b>K</b> PK <b>R</b> LIIRGNDEKEY <b>P</b> FLVK <b>G</b> EDLR <b>Q</b> D <b>Q</b> RIEQLFDI                              | 3779              |
| XENOPUS      | PMPEYHVKISGFDERVSV <b>M</b> <b>A</b> IR <b>K</b> PK <b>R</b> IIVRGNDERE <b>Y</b> PFLVK <b>G</b> EDLR <b>Q</b> D <b>Q</b> RIEQLFEI                              | 3787              |
| STERLET      | PLPEYHARITGFDERIKV <b>M</b> <b>S</b> MR <b>K</b> PK <b>R</b> LIMRGNDERE <b>Y</b> PFLVK <b>G</b> EDLR <b>Q</b> D <b>Q</b> RIEQLFDV                              | 3795              |
| GAR          | PLPEYHVKITGFDERVQ <b>S</b> LR <b>S</b> IR <b>K</b> PK <b>R</b> LIIRGSDERD <b>Y</b> PFLVK <b>G</b> EDLR <b>Q</b> D <b>Q</b> RIEQLFGV                            | 3792              |
| LATIMERIA    | PMPEYHAKITGFDERIKV <b>M</b> <b>A</b> IR <b>K</b> PK <b>R</b> LIIQGNDERE <b>H</b> PFLVK <b>G</b> EDLR <b>Q</b> D <b>Q</b> RIEQLFEV                              | 3786              |
| CAECIL       | PLPEYHVKISGFNERVKV <b>M</b> <b>S</b> IR <b>K</b> PK <b>R</b> IIILGNDEKEY <b>P</b> FLVK <b>G</b> EDLR <b>Q</b> D <b>Q</b> RIQQLFDV                              | 3789              |
| SNAKE        | PLPEYHAKISGFDERIKV <b>M</b> <b>Q</b> SMR <b>K</b> PK <b>R</b> IIVIRGNDERE <b>Y</b> PFLVK <b>G</b> EDLR <b>Q</b> D <b>Q</b> RIEQLFEV                            | 3773              |
| CANARY       | PLPEYHAKISGFDERISV <b>M</b> <b>S</b> LR <b>K</b> PK <b>R</b> IIVIRGNDERE <b>Y</b> PFLVK <b>G</b> EDLR <b>Q</b> D <b>Q</b> RIEQLFDV                             | 3778              |
| ONSTRICH     | PLPEYHVRIISGFDERIKV <b>M</b> <b>S</b> MR <b>K</b> PK <b>R</b> ITIRGSDEQ <b>E</b> Y <b>P</b> FLVK <b>G</b> EDLR <b>Q</b> D <b>Q</b> RIEQLFDV                    | 3748              |
| GECKO        | PLPEYHAKIAGFDERIKV <b>M</b> <b>L</b> SIR <b>K</b> PK <b>R</b> IIIRGSDERE <b>Y</b> PFLVK <b>G</b> EDLR <b>Q</b> D <b>Q</b> RIEQLFDV                             | 3788              |
| TURTLE       | PLPEYHAKISGFDERIKV <b>M</b> <b>S</b> IR <b>K</b> PK <b>R</b> INIRGSDERE <b>H</b> PFLVK <b>G</b> EDLR <b>Q</b> D <b>Q</b> RIEELFDV                              | 3786              |
| ALLIGATOR    | PLPEYHAKISGFDERIKV <b>M</b> <b>S</b> LR <b>K</b> PK <b>R</b> IIIRGSDERE <b>Y</b> PFLVK <b>G</b> EDLR <b>Q</b> D <b>Q</b> RIEQLFDV                              | 3745              |
| PLATYPUS     | PLPEYHAKITGFDERVKV <b>M</b> <b>A</b> IR <b>K</b> PK <b>R</b> IIIRGHDERE <b>Y</b> PFLVK <b>G</b> EDLR <b>Q</b> D <b>Q</b> RIEQLLDI                              | 3777              |
| TASDEVIL     | PLPEYHAKITGFDERVKV <b>M</b> <b>A</b> IR <b>K</b> PK <b>R</b> ITIRGNDEKEY <b>P</b> FLVK <b>G</b> EDLR <b>Q</b> D <b>Q</b> RIEQLFEV                              | 3782              |
| <b>HUMAN</b> | <b>PLPEYHVRIAGFDERVTVMASLRRPKRIIIRGHDEREHPFLVKGEDLRQDQORVEQLFQV</b>                                                                                            | <b>3770</b>       |
| MOUSE        | PLPEYHVRIISGFDERVKV <b>M</b> <b>L</b> SLR <b>K</b> PK <b>R</b> IIVIRGHDEKEY <b>P</b> FLVK <b>G</b> EDLR <b>Q</b> D <b>Q</b> RIEQIFEV                           | 3770              |
| CRASSO2      | PMPEYHIKVVGF <b>D</b> Q <b>R</b> VKV <b>M</b> T <b>S</b> IR <b>K</b> PK <b>R</b> ITIRGNDERE <b>Y</b> H <b>Y</b> LVK <b>G</b> EDLR <b>Q</b> D <b>Q</b> RIEQLFFL | 3763              |
| POMACEA      | PMPEYHVKVAGFDERVLV <b>M</b> <b>S</b> LR <b>R</b> PK <b>R</b> ITIRGNDEK <b>D</b> Y <b>H</b> LVK <b>G</b> EDLR <b>Q</b> D <b>Q</b> RIEQLFVL                      | 3766              |
| TRICHOPLAX   | PLPEYHLKIASFGERLLV <b>L</b> K <b>S</b> IR <b>K</b> PLR <b>L</b> TVQGDDEKEY <b>L</b> FLVK <b>G</b> EDLRL <b>D</b> Q <b>R</b> IEQLFCV                            | 3775              |
| NEMATOSTELLA | PMPEYHVNIAGFDEKVLV <b>L</b> <b>A</b> SIR <b>K</b> PK <b>R</b> V <b>T</b> IRGDDERD <b>H</b> MFLVK <b>G</b> ED <b>I</b> RL <b>D</b> Q <b>R</b> IEQLFCM           | 3762              |
| PRIAPULA     | PMPEYHVKIAGFDEKVLV <b>M</b> K <b>S</b> LR <b>L</b> PK <b>R</b> ITIRGHDERE <b>Y</b> MFLVK <b>G</b> EDLR <b>Q</b> D <b>Q</b> RL <b>E</b> QLFDI                   | 3793              |
| SOFTCORAL    | PLPEYHVKVAGFGEKV <b>K</b> <b>A</b> <b>M</b> <b>S</b> LR <b>A</b> PK <b>R</b> ITILGNDERE <b>H</b> TFLVK <b>G</b> EDLRL <b>D</b> Q <b>R</b> IQQLFGL              | 3788              |
| PISTILLATA   | PLPEYHVKIVGFDEKVQV <b>L</b> <b>P</b> SIR <b>K</b> PK <b>C</b> LIIRGDDEK <b>D</b> H <b>M</b> FLVK <b>G</b> EDLRL <b>D</b> Q <b>R</b> IEQLFGL                    | 3814              |
| HEMICHOR     | PLPEYHVKIAGFDEKVKV <b>M</b> <b>S</b> LR <b>K</b> PK <b>R</b> L <b>T</b> IRGNDEKEY <b>H</b> NFLVK <b>G</b> EDLRL <b>D</b> Q <b>R</b> IEQLFGI                    | 3799              |
| BELCHER      | PLMQYHAKIAGFDQ <b>R</b> VKV <b>M</b> <b>S</b> LR <b>K</b> PK <b>R</b> V <b>T</b> IRGDDERD <b>H</b> PFLVK <b>G</b> EDLR <b>Q</b> D <b>Q</b> RIQQLFDI            | 3845              |
| STRONG       | PLPAYHVKIAGFDE <b>T</b> VL <b>T</b> <b>L</b> <b>S</b> LR <b>K</b> PK <b>C</b> ITIRGNDE <b>M</b> D <b>Y</b> PFLVK <b>G</b> EDLR <b>M</b> D <b>Q</b> RIEQLFCI    | 3816              |
| STARFISH     | PLPEYHVKIAGFDEQVKV <b>L</b> <b>S</b> MR <b>K</b> PK <b>R</b> IIVIRGNDE <b>H</b> D <b>Y</b> SFLVK <b>G</b> EDLRL <b>D</b> Q <b>R</b> VEQLFRI                    | 3835              |
|              | : : : : * : * : : . : : *** **:* *.*::::                                                                                                                       |                   |

Supplementary Figure 9: Clustal Omega: DNA-PKcs alignment metazoan plus “putative archaeon”

|              |                                                             | <b>RYG70459.1</b> |
|--------------|-------------------------------------------------------------|-------------------|
| ARCHAEON     | MNQIVRKHERYSVEQDIVFNQALDFSQPVPYLLPEPATRPTLQADTGVKALEAL--RAR | 4266              |
| MUDCRAB      | MNSVYSSSPLCA-----HTSFHPSLD                                  | 3737              |
| SCORPION     | MNDIYQCNAICF-----QNKL--KLE                                  | 3775              |
| SPONGE       | MNKVLSDDPICS-----QRRL--NLR                                  | 3828              |
| CAPITELLA    | MNEIYANDANCH-----ARRL--QLK                                  | 3766              |
| DANIO        | MNMILSQDTACS-----QRSL--ALR                                  | 3783              |
| MILII        | MNIILSRDAACS-----QRSL--QLK                                  | 3804              |
| BAMBOO       | MNIILSRDAACS-----QRNL--QLK                                  | 3798              |
| XENOPUS      | MNIILSQDAACS-----QRHM--QLK                                  | 3806              |
| STERLET      | MNIILSRDATCS-----QRNL--QLK                                  | 3814              |
| GAR          | MNIILSQDAACS-----QRNL--GLR                                  | 3811              |
| LATIMERIA    | MNIILSQDAACS-----QRNL--QLK                                  | 3805              |
| CAECIL       | MNIILSQDAACS-----QRNM--QIK                                  | 3808              |
| SNAKE        | MNNILSRDAACS-----QRNM--QIK                                  | 3792              |
| CANARY       | MNIILSQDATCS-----QRNM--QLK                                  | 3797              |
| OSTRICH      | MNIILSQDAACS-----QRNM--QLK                                  | 3767              |
| GECKO        | MNTVLLQDAACS-----QRSM--QLK                                  | 3807              |
| TURTLE       | MNIILSQDAACS-----QRNM--QIK                                  | 3805              |
| ALLIGATOR    | MNIILSQDASCS-----QRNM--QIK                                  | 3764              |
| PLATYPUS     | MNIILSQDAACS-----QRNM--QLK                                  | 3796              |
| TASDEVIL     | MNIILSQDAACS-----QRNM--QLK                                  | 3801              |
| <b>HUMAN</b> | <b>MNGILAQDSACS-----QRAL--QLR</b>                           | <b>3789</b>       |
| MOUSE        | MNAILSQDAACS-----QRNM--QLR                                  | 3789              |
| CRASSO2      | MNQALESDPACK-----QRNL--KIK                                  | 3782              |
| POMACEA      | MNKVLEKDPVCK-----ARRL--VLK                                  | 3785              |
| TRICHOPLAX   | MNEILAQDSICS-----QQDL--RLR                                  | 3794              |
| NEMATOSTELLA | MNEVMSEDPACS-----QRNL--RLR                                  | 3781              |
| PRIAPULA     | MNRSLDADAACR-----QRAL--RLR                                  | 3812              |
| SOFTCORAL    | MNDVMRDDAACH-----QRNL--SLK                                  | 3807              |
| PISTILLATA   | MNDIMANDSACS-----QRGL--RLR                                  | 3833              |
| HEMICHOR     | MNDILALDAACS-----QRSL--KLV                                  | 3818              |
| BELCHER      | MNDILTLDPACS-----QRQL--RIR                                  | 3864              |
| STRONG       | MNSILAQDAACS-----QRGL--TLT                                  | 3835              |
| STARFISH     | MNSILEQDSTCS-----QQGL--QLV                                  | 3854              |
|              | ** :                                                        |                   |

Supplementary Figure 9: Clustal Omega: DNA-PKcs alignment metazoan plus "putative archaeon"

|              |                                                                                                                    | <b>RYG70459.1</b> |
|--------------|--------------------------------------------------------------------------------------------------------------------|-------------------|
| ARCHAEON     | <b>TYGVVPMSTKVGILEWV</b> PNTISLR <b>AILAEEMVKDDYIQKTQRQAIEEKDGHLELSL</b> FALS                                      | 4326              |
| MUDCRAB      | <b>TYQVIPLSSEVGM</b> LKW <b>VESTQPLLD</b> FIKDSFK <b>EGEAKCLDEAE</b> -----T---                                     | 3781              |
| SCORPION     | <b>TYQVIPLTTKIGLIEW</b> VDN <b>TNVLGSFLK</b> DAMTD <b>KEKESFR</b> -----ESD                                         | 3818              |
| SPONGE       | <b>TYSVIPVTPRVGLIEW</b> V <b>RNTMPLKDFIQ</b> LS <b>DPEKKSLP</b> -----A                                             | 3867              |
| CAPITELLA    | <b>TFQVIPMTPRLGMIEW</b> L <b>KNSCTLKDFLR</b> QGCSD <b>VSWEQIQNKN</b> -----LPNN                                     | 3813              |
| DANIO        | <b>TYQVIPITSRIGLIEW</b> MENT <b>CTLKDFLSS</b> RRTE <b>EQEQKT</b> -----ITR                                          | 3824              |
| MILII        | <b>TYQVIPMTRSRLGLIEW</b> LD <b>NTCTLKDFLSS</b> NITE <b>ETQSR</b> RQ-----QE                                         | 3846              |
| BAMBOO       | <b>TYQVIPMTRSRLGLIEW</b> LD <b>NTCVVKDFL</b> LSNMTE <b>DEHKRPS</b> -----P-                                         | 3839              |
| XENOPUS      | <b>TYQVIPMTRIGLIEW</b> LE <b>NTCTLKEFL</b> LN <b>TMTEDEAKI</b> YNSKT-----TNG                                       | 3852              |
| STERLET      | <b>TYQVIPMTARIGLIEW</b> LE <b>NTCTLKEFL</b> DRMTE <b>EEERKH</b> -----CKR                                           | 3855              |
| GAR          | <b>TYQVIPMTRIGLIEW</b> LE <b>NTCTLKDFL</b> DSR <b>RTPEEKS</b> -----SPS                                             | 3852              |
| LATIMERIA    | <b>TYQVIPMTRIGLIEW</b> LE <b>NTCTLKEFLS</b> NAMTE <b>EEERTNYETLS</b> -----PKKG                                     | 3852              |
| CAECIL       | <b>TYQVIPMTRLGLIEW</b> LE <b>ATNTLKD</b> FLYNSM <b>S</b> EA <b>EQENC</b> S--S-----T--                              | 3850              |
| SNAKE        | <b>TYQVIPMTRLGLIEW</b> LE <b>NTYTLKEFL</b> LKNM <b>S</b> EQEK <b>NCYN</b> --S-----SQG                              | 3836              |
| CANARY       | <b>TYQVIPMTRLGLIKW</b> LE <b>NTCTLKEFL</b> KNSM <b>S</b> EEED <b>INYY</b> --S-----PRG                              | 3841              |
| OSTRICH      | <b>TYQVIPMTRLGLIKW</b> LE <b>NTCTLKEFL</b> KNSM <b>S</b> EEED <b>FNYS</b> --S-----KKG                              | 3811              |
| GECKO        | <b>TYQVIPMTRLGLIEW</b> L <b>NGTCTLKEFL</b> LQ <b>NM</b> S <b>EQEK</b> ND <b>YN</b> --S-----SKG                     | 3851              |
| TURTLE       | <b>TYKVIPMTRLGLIEW</b> LE <b>NTCTLKN</b> FL <b>MES</b> S <b>EEK</b> DD <b>YH</b> --S-----RKG                       | 3849              |
| ALLIGATOR    | <b>TYQVIPMTRLGLIEW</b> L <b>PNTCTLKN</b> FL <b>HS</b> M <b>S</b> EE <b>E</b> K <b>ADY</b> C--S-----EKG             | 3808              |
| PLATYPUS     | <b>TYQVIPMTRLGVIEW</b> LE <b>NTCTLKE</b> L <b>L</b> KSM <b>S</b> EGE <b>KAA</b> YE--S-----NPKG                     | 3841              |
| TASDEVIL     | <b>TYHVIPMTRLGLIEW</b> I <b>ENTCTLKE</b> L <b>LL</b> NM <b>S</b> EE <b>E</b> K <b>AA</b> YE--S-----GPKA            | 3846              |
| <b>HUMAN</b> | <b>TYSVVPMTRSRLGLIEW</b> LE <b>NTVTLKDLL</b> NT <b>S</b> Q <b>EE</b> K <b>AA</b> YL--S-----D <b>PRA</b>            | <b>3834</b>       |
| MOUSE        | <b>TYRVVPMTRSRLGLIEW</b> I <b>ENTMTLKD</b> LL <b>S</b> NM <b>S</b> Q <b>EE</b> K <b>V</b> ANN--S-----D <b>PKA</b>  | 3834              |
| CRASSO2      | <b>TYQVIPMTRSRLGLIEW</b> M <b>NDTIPLKEFL</b> IC <b>N</b> LTE <b>Q</b> E <b>AK</b> F <b>V</b> S-----                | 3822              |
| POMACEA      | <b>TYQVIPMTRVGLIEW</b> M <b>SNTIPLKEFL</b> L <b>N</b> AMTE <b>K</b> ERT <b>AY</b> F--G-----E-NG                    | 3829              |
| TRICHOPLAX   | <b>TYQVIPITQRLGLIEW</b> M <b>KNTITLKEF</b> VTD <b>AM</b> ED <b>HEK</b> QH <b>YL</b> --S-----SQNS                   | 3839              |
| NEMATOSTELLA | <b>TYQVIPMTQRVGLIEW</b> L <b>KNTKPLKE</b> LL <b>HIA</b> ATE <b>S</b> E <b>K</b> Q <b>AM</b> V--V-----RRKT          | 3826              |
| PRIAPULA     | <b>TYAVVPMSTRLLGLIEW</b> V <b>PRTKPLKQL</b> L <b>Q</b> E <b>AM</b> T <b>Q</b> Q <b>Y</b> DAY <b>Y</b> --S-----YSMN | 3857              |
| SOFTCORAL    | <b>TYKVIPMTRSRLGLIEW</b> LE <b>NTTVLKEF</b> IR <b>N</b> GL <b>S</b> ET <b>EN</b> ET <b>FD</b> --T-----I---         | 3849              |
| PISTILLATA   | <b>TYQVIPMTPRVGLIEW</b> M <b>NNTKPLKGV</b> L <b>S</b> AMT <b>K</b> A <b>EN</b> D <b>H</b> YI--G-----P-NG           | 3877              |
| HEMICHOR     | <b>TYEVIPMTPRIGLIEW</b> V <b>DHCLPLKV</b> FL <b>S</b> EAMT <b>K</b> N <b>ERS</b> SH <b>YA</b> --N-----T---         | 3860              |
| BELCHER      | <b>TYGVIPMTRSRLGLIEW</b> M <b>QNTTPLAG</b> FL <b>E</b> NAMT <b>T</b> RE <b>Q</b> E <b>A</b> FL--H-----Q-RL         | 3908              |
| STRONG       | <b>TYQVVPMTPRLGILEW</b> V <b>KRTTTLKDFI</b> TR <b>S</b> MTE <b>A</b> E <b>H</b> K <b>V</b> Y <b>T</b> --S-----RTTG | 3880              |
| STARFISH     | <b>TYEVIPMTPRLGMIEW</b> A <b>QNTTTLKEFL</b> H <b>L</b> AMTE <b>Q</b> E <b>G</b> N <b>AY</b> N--S-----R-HG          | 3898              |
|              | *: *:*. .:*. : .:                                                                                                  |                   |

Supplementary Figure 9: Clustal Omega: DNA-PKcs alignment metazoan plus "putative archaeon"

|              |                                                                    | <b>RYG70459.1</b> |
|--------------|--------------------------------------------------------------------|-------------------|
| ARCHAEON     | SAELRTNWLK-----GNGTTDYHQMYRNAPLASAAAVYDAITSILPTYYLQRR              | 4375              |
| MUDCRAB      | FYRTEEPWNF-----RKKTTDKRRVKKYEDAVNRIPWDILRRGL                       | 3820              |
| SCORPION     | PKMTFYKFLLSKTNS----RDKSIPLLYENIYKI-ADTEVNKKFTECINMIPWDLFRRAF       | 3873              |
| SPONGE       | ASKMNQKWLEQKFGG-----SNYVNWYEMYKKLKADEVKKEYRRIVSAVPWDLRRSL          | 3921              |
| CAPITELLA    | PANLLCQWIGDSSNT-----RQMIENYRKCYQKYSRNETLNAFKKREAMVPWDMRLKSY        | 3867              |
| DANIO        | PNEFYDEWISKVAG-----KVEGIRRYAELYKKAKRVDTVNNFRRIEQMVPDILLKRAF        | 3878              |
| MILII        | VLPKYREWLOKMagr----K-DMFLRYPTMYLKASRTETVTAFRTHEQAI PGDILLRAF       | 3900              |
| BAMBOO       | -KELFSEWLQRISSG-----KSDVTTLYGQMYMKASRTETVKAFRQCERAVPPDILLRAF       | 3893              |
| XENOPUS      | PLYHYNAWLDKKEK-----VGDARQHVTSYTRCDRTNTVASFREREALVPKDLLRRAF         | 3905              |
| STERLET      | PAESYMEWLSKVAG-----KEKGIAQYITMYKTAKRTETVRAFRNVEHHVPEDILLRAF        | 3909              |
| GAR          | PQDMYSAWLEKISR-----RSKGQEQYHEVYKKASRTETVANFQSI EKLVPQDILLRAF       | 3906              |
| LATIMERIA    | PKAQYNEWLTKMAGG-----SVGPQRYGSMYKRASRTETVMAFRSVESSLVSRDILLRAF       | 3906              |
| CAECIL       | -TKHYKDWIQKMG-----CDNISRYEYMYRRASYTETVVAFKARENLPDILLRAF            | 3902              |
| SNAKE        | PFADYKDWLCKMGE-----RNRIECYMTMFKRASRTETVMSFQHRENRPEDILLKRAF         | 3889              |
| CANARY       | PRATYSEWLSRMGG-----KAQGISRYHMYRNASRTETAVTSFKSRESSVPEDILLRAF        | 3895              |
| OSTRICH      | PRATYNEWLSKMGG-----KAQGVPRYHVMYRNANRTETVMSFKSRESSVPEDILLRAF        | 3865              |
| GECKO        | PRADYNEWLSKMGD-----RNAGLVNYVSMYKKASRIETVTSFQQRENLPEDILLRAF         | 3905              |
| TURTLE       | PRIMYSDWLSKMAGK-----ENGIARYKTMYSRANRTETVLSFRNRETSVPGDILLRAF        | 3903              |
| ALLIGATOR    | PLFAYNEWLSKMAGG-----KIEDFARYMPMYKRASRTETVMSFRNRENRPEDILLRAF        | 3863              |
| PLATYPUS     | PVHEYSEWLYKMSK-----KQDFGAYMLMYKHASRTETAVTAFRNRENRPDILLRAF          | 3894              |
| TASDEVIL     | PQLEYSTWLTKITG-----KQDISAYMLMYRRANRTETITTSFRNRESKVPADILLRAF        | 3899              |
| <b>HUMAN</b> | <b>PPCEYKDWLTKMSG-----KHDVGAYMLMYKGANRTETVTSFRKRESKVPADILLKRAF</b> | <b>3887</b>       |
| MOUSE        | PIRDYKDWMKVSG-----KSDAGAYVLMYSRANRTETVVAFRRRESQVPPDILLKRAF         | 3887              |
| CRASSO2      | -GNLHNSWIMKLSKD-----PRDVQQGYMQMYLKYNMTETRRELQKKENIIPWDLRRAF        | 3876              |
| POMACEA      | PSQLHYKWLPKLPK-----TDWGLIYGQVYQNYSKTETMKEFRICESKVPWDLRRAL          | 3883              |
| TRICHOPLAX   | PHQLYSKWLKFGSA-----GGPVYMYQSMYRKAKRSEVENHFKFRENSVPWDLRRGF          | 3893              |
| NEMATOSTELLA | KNMLDL-----TLRILFDIIISREANRTDTESEFKKKQAQVPWDLRRAF                  | 3871              |
| PRIAPULA     | PVEHFNKWAATALTASESKRAASHVKLYARTFVQCSKSDTVRSFRERESMVPDILLRQAF       | 3917              |
| SOFTCORAL    | -GYKHNKWIVEKFPV---NGNKHIINNYYPFKKASREVI ERKFRELQNLMPHDALRRSF       | 3905              |
| PISTILLATA   | AGACYRNWIDKFKGD-----PRNPSRFYGEMFKKANRTETERSFTQKQALVPWDLRRAF        | 3932              |
| HEMICHOR     | -RLDHHTWVDKMKVHV---GDRTSHCVRYGELYKVASRTEILKKFQDLHTQVPWDALRRAF      | 3917              |
| BELCHER      | PLIDFDAYVHRLGGTV---K-NDPWGKVYGSLYQKASRTDVTLAFRQVQSKVTWDIMRRGY      | 3965              |
| STRONG       | PVALFTTWLQKFCQT---D-G-NITKLFTEAYKKANETETIKAFREREAKLPWDLRRGF        | 3935              |
| STARFISH     | PRYQHSEWVDKYAKG---N-QSNHGVRYGAVYRHANYTDTVKCFRSWEALVPWDLRRAF        | 3954              |

:        ::

Supplementary Figure 9: Clustal Omega: DNA-PKcs alignment metazoan plus "putative archaeon"

|              |                                                                    | <b>RYG70459.1</b> |
|--------------|--------------------------------------------------------------------|-------------------|
| ARCHAEON     | LSMSRNAETYYTLLHEFLASLSVNNIFGYILGIGDRHLENLLLDSSSTGSIVNIDFGICFG      | 4435              |
| MUDCRAB      | VRLSSSSEGFSSLRSLFANSYATMCVSHWLLGIGDRHCGNTLVSLKTGRVVGIDFGHHFE       | 3880              |
| SCORPION     | LKFSSSL EAFVILRYNFITSHAVLCISQWLLGIGDRHTGNFLVSTTTGIEVGIDFGHAFG      | 3933              |
| SPONGE       | ISLASTSESFLLLRCTFIQSLSVINICQYILGIGDRHLSNFMVDMETGQLVIGIDFGHAFH      | 3981              |
| CAPITELLA    | QKLASSPEASYFVLRGNCATSHALNCISAYIMGIGDRHLSNHMVDLINGKMI AIDFGHAFG     | 3927              |
| DANIO        | VRMSTTPEAFLSLRSHFSSSHAVLCISHWILGIGDRHLSNFMINTETGGMIGIDFGHAFG       | 3938              |
| MILII        | IKMSTTPEAFLLRSHFASSHALMCISHWILGIGDRHLSNFMV NLETGGMVIGIDFGHAFG      | 3960              |
| BAMBOO       | TKMSTTPEAFLLRSHFASSHALMCVSHWILGIGDRHLSNFMINLETGGMVIGIDFGHAFG       | 3953              |
| XENOPUS      | VKMSTTPEAFLSLRSHFARSHALLCVSHWIVGIGDRHLSNFMINMETGGMIGIDFGHAFG       | 3965              |
| STERLET      | MKMSTTPEAFLSLRSHFTCSHALMCVSHWILGIGDRHLSNFMINMETGGMVIGIDFGHAFG      | 3969              |
| GAR          | IQLSTTPESFLLRSHFASSTHALICVSHWILGIGDRHLSNFMVNMETGGMVIGIDFGHAFG      | 3966              |
| LATIMERIA    | TKMSTSP EAFLLRSHFASSHALMCISHWILGIGDRHLSNFMINMETGGMVIGIDFGHAFG      | 3966              |
| CAECIL       | TKMSTTPEAFLLRSHFASSHALICISHWILGIGDRHLSNFMINMETGGMVIGIDFGHAFG       | 3962              |
| SNAKE        | VKMSTTPEALLSLRSHFASSTHALLCISHWILGIGDRHLSNFMISTETGGLVIGIDFGYAFG     | 3949              |
| CANARY       | VKMSTSP EAFLLRSHFASSHALMCISHWILGIGDRHLSNFMINKETGGMVIGIDFGYAFG      | 3955              |
| OSTRICH      | VKMSTAPEAFLSLRSHFASSHALMCISHWILGIGDRHLSNFMINKETGGMVIGIDFGHAFG      | 3925              |
| GECKO        | VKMSTTPEAFLSLRSHFASSHALMCISHWILGIGDRHLSNFMVNMETGGMVIGIDFGHAFG      | 3965              |
| TURTLE       | VKMSTAPEAFLSLRSHFASSHALMCISHWILGIGDRHLSNFMINMETGGMVIGIDFGHAFG      | 3963              |
| ALLIGATOR    | VKMSTAPEAFLSLRSHFTSSHALICISHWILGIGDRHLSNFMINTETGGIIGIDFGYAFG       | 3923              |
| PLATYPUS     | VKMSTRPEAFLLRSHFARSHALLCVSHWILGIGDRHLSNFMINLETGGMVIGIDFGHAFG       | 3954              |
| TASDEVIL     | VKMSTTPEAFLLRSHFASSHALMCISHWILGIGDRHLSNFMINMETGGMIGIDFGHAFG        | 3959              |
| <b>HUMAN</b> | <b>VRMSTSP EAFLLRSHFASSHALICISHWILGIGDRHLNFMVAMETGGVIGIDFGHAFG</b> | <b>3947</b>       |
| MOUSE        | VKMSTSP EAFLLRSHFASSHALLCVSHWLLGIGDRHLNFMVAMETGSVIGIDFGHAFG        | 3947              |
| CRASSO2      | HKMSTSP EAFHVL RCKCASTHALISICQYVLGIGDRHLSNFMINLKN GEMVIGIDFGHAFG   | 3936              |
| POMACEA      | QHLSSTPEAFHFLRCEMLTSHAVLCICHYLLGIGDRHLSNFMVNGRTGHMVIGIDFGHAFG      | 3943              |
| TRICHOPLAX   | VALSASSEAYLMLRSHFARTHATVSI CHYLLGIGDRHLSNFMIDRLTGGMIGIDFGHAFG      | 3953              |
| NEMATOSTELLA | QQLAASPEAYLTLRTHFARTHACICICQYVLGIGDRHLSNFLVDMRTGGLIGIDFGHSFG       | 3931              |
| PRIAPULA     | LRLSASP EAFLLRTHFIKSHATLSVCHYVVGIGDRHLSNFMVSQEDGGMVIGIDFGHAFG      | 3977              |
| SOFTCORAL    | MRLASSPEAFLLRAYFARTYGCMTICHYILGIGDRHLSNSMVDLKQGRVIGIDFGHAFG        | 3965              |
| PISTILLATA   | LQLAVSPEAFFILRSHFASSHACLICQYILGIGDRHLSNFLVDMETGGMIGIDFGHAFG        | 3992              |
| HEMICHOR     | QRLSSSPEAFLLRSHFATSHALLCICQYILGIGDRHLSNFMISLDTGAMVIGIDFGHAFG       | 3977              |
| BELCHER      | LQMSSCP EAFLLRSHFTTTHATLCAQYVLGIGDRHLGNFMIDLES GGMVIGIDFGHAFG      | 4025              |
| STRONG       | MQLSASP EAFLLRAHFARSHAVLCICQYILGIGDRHLSNFLVSLLETGGMVIGIDFGHSFG     | 3995              |
| STARFISH     | IQLSASP EAFLLRSHFARSHAVICICQYILGIGDRHLSNFLISLKTGGMIGIDFGHAFG       | 4014              |
|              | :: * * : . : : : : * * * * * * * : : * : * * * *                   |                   |

Supplementary Figure 9: Clustal Omega: DNA-PKcs alignment metazoan plus "putative archaeon"

|              |                                                                      | <b>RYG70459.1</b> |
|--------------|----------------------------------------------------------------------|-------------------|
| ARCHAEON     | MGA--SVLPVPELIPMRLTRQLTDIAQPLQ--GLEVIRQHMQRVLGCLRKEKSLQLQNALE        | 4491              |
| MUDCRAB      | TAV--QVLPFPELMPFRLTRQIVNVFQPLG--PVGMIKDVMAVVLGTLQESRHVILSVLE         | 3936              |
| SCORPION     | TAT--QFLPIPELVPFRLTRQYLNLMPLK--EKGVIEATMISALSALRDNADILLNTMD          | 3989              |
| SPONGE       | SAT--QFLPLPELMPFRLTRQFVNLLLPHK--VSGQLRSCMIHTLRALRHSPTLLLNTMD         | 4037              |
| CAPITELLA    | SAT--QFLDIPELIPFRMTRQLRNLLLPLR--EKGVIEGTMVHSLRALRQHKEQLISTMD         | 3983              |
| DANIO        | SAT--QFLPVPELMPFRLTRQFINLMRPLA--ESGLIQSVMVHSLRAFRAEPDLLNTMD          | 3994              |
| MILII        | SAT--QFLPVPELMPFRLTRQILNLMPLMK--ESGLIRSIMVHGLRAFRLDPDLLSTMD          | 4016              |
| BAMBOO       | SAT--QFLPVPELMPFRLTRQFNLMLPMK--ESGLIYSTMVHGLRAFRLDPDLLNTMD           | 4009              |
| XENOPUS      | TAT--QFLPVPELMPFRLTRQIVNLMPLMK--DSGLFDSVMVHSLRAYRSDPGLLVTTMD         | 4021              |
| STERLET      | SAT--QFLPVPELMPFRLTRQFNLMLPMR--ESGQIYSVMVHSLRAYRADPDLINTMD           | 4025              |
| GAR          | SAT--QFLTVPPELMPFRFTQFNLMLPMG--VSGLISSVMHALRAYRAEPDLLNTMD            | 4022              |
| LATIMERIA    | SAT--QFLPVPELMPFRLTRQFNLMLPMK--EQGLIYSVMVHALRAYRANPDLNTMD            | 4022              |
| CAECIL       | SAT--QFLPVPELMPFRLTRQFVQLMLPMK--ESGLIESVMVHALRAYRTDPSSLITMD          | 4018              |
| SNAKE        | SAT--QFLQPELMPFRLTRQFVNLMPLMK--ESGLMYSVMVHSLRAYRINQDVLINTMD          | 4005              |
| CANARY       | AAT--QFLSVPELMPFRLTRQFVNLMMPVK--EWGLIYSVMVHALRAYRSDPDLISTMD          | 4011              |
| OSTRICH      | SAT--QFLPVPELMPFRLTRQFVNLMMPVK--EWGLIYSVMVHALRAYRADPDLISTMD          | 3981              |
| GECKO        | SAT--QFLPVPELMPFRLTRQFINLMPLMK--ETGLIYSVMVHSLKAYRVYPDLINTMD          | 4021              |
| TURTLE       | SAT--QFLQVPELMPFRLTRQFINLMPLMK--ESGLIYSVMVHSLRAYRTEPDLVSTMD          | 4019              |
| ALLIGATOR    | SAT--QMLPVPELMPFRLTRQFINLMPLMK--ESGLIYSIMTHALRAYRKDPDLINTMD          | 3979              |
| PLATYPUS     | SAT--QFLPVPELMPFRLTRQLINLMSPMK--ESGLVYSVMVHALHAFRTDPDLLNTMD          | 4010              |
| TASDEVIL     | SAT--QFLPVPELMPFRLTRQFINLMPLMK--ETGLIYSVMVHALRAFRLDPGLLISTMD         | 4015              |
| <b>HUMAN</b> | <b>SAT--QFLPVPELMPFRLTRQFINLMPLMK--ETGLMYSIMVHALRAF RSDPGLLTNTMD</b> | <b>4003</b>       |
| MOUSE        | SAT--QFLPVPELMPFRLTRQFVSLMLPMK--ETGLMCTVMVHALRAF RSCAGLLTDTME        | 4003              |
| CRASSO2      | SAT--QFLPIPELIPFRLTRQLRNLMMPLO--VHGLMESTMIHTLRALRNNCDLLNTMD          | 3992              |
| POMACEA      | SAT--QFIPVPELMPFRLTRQIVNLGLPFK--VKGLENTMIHV LHALRQNHDLLSTMD          | 3999              |
| TRICHOPLAX   | SAT--QFLPLPELMPFRLTRQMLNLMPLR--ENGQLKCSMVHTLRALRNKPDLLVNTMD          | 4009              |
| NEMATOSTELLA | SAT--QFLPVPELVPFRLTRQFTNLLLPLK--ESGLVRNTMIHV MRALRGNHELLNTMD         | 3987              |
| PRIAPULA     | HSHPRCCLPIPELMPVRLTRQFQLLLPHEGQRRGLYQTMVHTLRALRDNRHLLNTLD            | 4037              |
| SOFTCORAL    | SAT--QFLPLPELMPFRLTRQICNMMEPLR--VSGQLQSTMVYTMRALRNNHEILLNTMD         | 4021              |
| PISTILLATA   | SAT--QFQPLPELMPFRLTRQFVNLMPLK--KSGTLQSVMIHTLRALRSNHDLLNTMD           | 4048              |
| HEMICHOR     | SAV--ELLPVPELMPIRLTRQIVNLMTPMK--EDGLILSTMVHGLRALRNNPDLLNTMD          | 4033              |
| BELCHER      | SAT--QHLPVPELMPFRLTRQMLNLLLPLK--ESGLLQSTMVHVLRALRSSPNVLLINTMD        | 4081              |
| STRONG       | SAT--QFLPIPELIPFRVTRQIINLMPLMK--IDGVLQSTMVHTLRALRQNHELLVNTMD         | 4051              |
| STARFISH     | SAT--QFLPVPELMPFRLTRQIVNLMPLFK--KEGILQSSMVHTLRALRQNHELLINTMD         | 4070              |

. . . . . : . \* . \* \* \* . : \* . \* : : : . : :

Supplementary Figure 9: Clustal Omega: DNA-PKcs alignment metazoan plus "putative archaeon"

|              |                                                            | <b>RYG70459.1</b> |
|--------------|------------------------------------------------------------|-------------------|
| ARCHAEON     | IYINDPLMDWMRGAAEALDREALDQREQLLGGSFESSGTLPP-----NNKEMSESVLW | 4545              |
| MUDCRAB      | AFVKEPTEDWKEFVRELEG-----NLDESKIEM                          | 3964              |
| SCORPION     | IFIKEPTVNWQENALKQKRIIGKVDEN-----VSDINIYPGNTESDDPNHSECDFNW  | 4042              |
| SPONGE       | VFIKEPSLEWESNAKKQALAQ-----KINTDDNTW                        | 4067              |
| CAPITELLA    | VFIKEPSLDWQNAAKKEIQAMSNR-----KEDTSKLTLDLSQW                | 4020              |
| DANIO        | VFVKEPSLDWKNFELKQLKKGGTW-----TESVNTKEINW                   | 4029              |
| MILII        | IFVKEPSLDWKNLELKQMKKGGTW-----NKDVNTREIHW                   | 4051              |
| BAMBOO       | VFVKEPSLDWKNFELKQLKKEGSW-----SKDVNINEINW                   | 4044              |
| XENOPUS      | VFIKEPSLDWKNLELKQMKKKGW-----KKAVDVTSHNW                    | 4056              |
| STERLET      | VFVKEPSLDWKNFELKQMKKAGSW-----SEAVNTNEINW                   | 4060              |
| GAR          | VFVKEPSLDWKNFELKQLKKGGTW-----KETVNTKEIDW                   | 4057              |
| LATIMERIA    | VFVKEPSLDWKNFELKQLKKGGSW-----TKEVNTKEVNW                   | 4057              |
| CAECIL       | VFVKEPCLDWNNFMLKQLKKGQGTW-----TKKVNTAEKNW                  | 4053              |
| SNAKE        | IFVKEPSLDWKNFELKQLRKGGTW-----TKEINTDEVNW                   | 4040              |
| CANARY       | VFVKEPSLDWKNFEQRQLKKGGTW-----IKEINTSEVNW                   | 4046              |
| OSTRICH      | VFVKEPSLDWKNFEQRQLKKGGTW-----IQEINTSEVNW                   | 4016              |
| GECKO        | IFVKEPSLDWKNFELKQLKKGGTW-----TKDINMDEVNW                   | 4056              |
| TURTLE       | VFVKEPSLDWQNFELKQLKKGGTW-----SKEVNTAEINW                   | 4054              |
| ALLIGATOR    | VFVKEPSLDWKNFELRLKKGGTW-----LKEVNTCEVNW                    | 4014              |
| PLATYPUS     | VFVKEPSLDWKNFETKMLKRGGTW-----TRAVNTADTNW                   | 4045              |
| TASDEVIL     | VFVKEPSLDWKNFEQKMLKKGGSW-----TREVNMTEMNW                   | 4050              |
| <b>HUMAN</b> | <b>VFVKEPSFDWKNFEQKMLKKGGSW-----IQEINVAEKNW</b>            | <b>4038</b>       |
| MOUSE        | IFVKEPSFDWKSFEQTMLRKGGSW-----IQEINVTEKNW                   | 4038              |
| CRASSO2      | IFVKEPSVDLWVNAEKQMNEMKVE-----VSPEDDEVQW                    | 4025              |
| POMACEA      | VFVKEVSLDWLQFAERQMRGGMGP-----KDADEDMRW                     | 4032              |
| TRICHOPLAX   | VFIKEPSLDWQNFANRQNAKQGL-----KTESDDFSW                      | 4041              |
| NEMATOSTELLA | VFVKEPSLDWQMFARKQAEDQHME-----IGMYEDLTW                     | 4021              |
| PRIAPULA     | VFIKEPSIDWKATAERLADKDIHS-----NESDQGEQVQEW                  | 4073              |
| SOFTCORAL    | VFVKEPSLDWQNFARKQAQKQLN-----LNDMTDLAW                      | 4054              |
| PISTILLATA   | VFIQEPSLDWQVYARKQAKTQGIN-----EEEQKADW                      | 4080              |
| HEMICHOR     | VFVKEPHLDWQKRAKSDASKYGDA-----AEDANEMIER                    | 4067              |
| BELCHER      | VFIKEPHLDWKNFAAQMDKG-----MVGEDDDLDDISW                     | 4115              |
| STRONG       | VFVKEPSLDWKCFAVKQADYQKLS-----EDSREDISW                     | 4084              |
| STARFISH     | VFIKEPSLDWKTNASKQAKAQDAGR-----LEG-----QSDPDGNSLDESW        | 4113              |
|              | ::: :*                                                     |                   |

Supplementary Figure 9: Clustal Omega: DNA-PKcs alignment metazoan plus "putative archaeon"

|              |                                                                               | <b>RYG70459.1</b> |
|--------------|-------------------------------------------------------------------------------|-------------------|
| ARCHAEON     | EPVRRVGGALR <b>KLS</b> GEDPLALLQEDLSNNVMVTR--MKSVDGLCRILGDVRRLLGAEAG <b>G</b> | 4603              |
| MUDCRAB      | FSEERMRCLKE <b>KL</b> TGFNPAYVTVWALSKNKAVRR-DPTAFEELKKV-----VL <b>G</b>       | 4012              |
| SCORPION     | YPKQRILFAKR <b>KL</b> EGINPCYITKEELRLGHSNKP----IFQRLTDV-----CL <b>G</b>       | 4087              |
| SPONGE       | YPKEKVNICR <b>KL</b> LGFNSSHMLIDLEHGFKNKP----EFKYLKGI-----LL <b>G</b>         | 4112              |
| CAPITELLA    | FPKEKVNIVRQ <b>KL</b> EGSNPSHVMRAELALGQLGS-----YLKYFVIV-----LM <b>G</b>       | 4064              |
| DANIO        | FPLQKVNFAARR <b>KL</b> EGTNPSVITSEELCLGF EKMP----EYKGLLAV-----ARG             | 4074              |
| MILII        | YPMQKVR YARR <b>KL</b> EGANPAAITRDELQLGHETTE----AYKSYVAV-----AM <b>G</b>      | 4096              |
| BAMBOO       | YPRQKVN YAKR <b>KL</b> EGANPSAITRDELQLGHEKSK----AYASYVAV-----AM <b>G</b>      | 4089              |
| XENOPUS      | HPQQKIHC AKR <b>KL</b> DGANPCETCEELRLGHESAP----EYKDFIAV-----ARG               | 4101              |
| STERLET      | YPMQKVNFAARR <b>KL</b> EGANPAVITSEELKLGFEKSP----AYQSI IAV-----A <b>Q</b> G    | 4105              |
| GAR          | YPRQKVQFAQR <b>KL</b> EGANPAAITSDLEKLGFEKES----WCRAALAM-----A <b>Q</b> G      | 4102              |
| LATIMERIA    | YPVQKVKCGRQ <b>KL</b> EGVNP I VITCNE LQLGHEKLS----AYQSYLAV-----V <b>K</b> G   | 4102              |
| CAECIL       | YAVQKVNCAARR <b>KL</b> AGTNPAITCDELELGHEKSV----AYKEMKAV-----AM <b>G</b>       | 4098              |
| SNAKE        | YPLQKVKIARR <b>KL</b> AGANPAVITCDE LRLGHEKSE----AFREYVSV-----A <b>Q</b> G     | 4085              |
| CANARY       | YPLQKVN YVRR <b>KL</b> TGANPAITCDE LRLGHESP----AYNDFAAV-----ARG               | 4091              |
| OSTRICH      | YPLQKVS YVRR <b>KL</b> TGNPGRITCDE LRLGHESP----FFSDFVAV-----ARG               | 4061              |
| GECKO        | YPLQKVNFAARR <b>KL</b> AGANPAVITSDLE LRLGHEKSS----AYRYVSV-----ARG             | 4101              |
| TURTLE       | YPLQKVNCAKR <b>KL</b> AGANPAVITCDE LRLGHESP----AYKEYVAV-----A <b>Q</b> G      | 4099              |
| ALLIGATOR    | YPLQKVN CVKR <b>KL</b> AGSNPAAITCEELRLGHEKSL----AYRDYVAV-----ARG              | 4059              |
| PLATYPUS     | YPLQKIS YAKR <b>KL</b> TGNPAITCDE LRLGHEKVP----AFGDYISV-----ARG               | 4090              |
| TASDEVIL     | YPLQKIN YAKR <b>KL</b> AGANPAAITCDE LHLGHEKVP----AFECYVSV-----A <b>Q</b> G    | 4095              |
| <b>HUMAN</b> | <b>YPRQKICYAKR<b>KL</b>AGANPAVITCDE LLLGHEKAP----AFRDYVAV-----ARG</b>         | <b>4083</b>       |
| MOUSE        | YPQHKIR YAKR <b>KL</b> AGANPAVITCDE LYLGHEASS----AFRSYTAV-----ARG             | 4083              |
| CRASSO2      | YPKEKIE YVKKR <b>KL</b> RGNPVCISREELKLGHSKKP----AFPALERV-----L <b>Q</b> G     | 4070              |
| POMACEA      | YPKQKIETAAR <b>KL</b> KGNPSYITRDEL RIGHLRNQ----ALKDFEKV-----AL <b>G</b>       | 4077              |
| TRICHOPLAX   | YPREKVTF AKR <b>KL</b> KGANPAFVTRDEL RRLCHHL-----SILESF-----AL <b>G</b>       | 4082              |
| NEMATOSTELLA | YPREKVLTAQR <b>KL</b> KGANPAFVTRQEL ELGHRRS----WFRNLQSA-----CL <b>G</b>       | 4066              |
| PRIAPULA     | YPKQTI GVAR <b>KL</b> IGANPAHITKAELALGHRKHE----ALKQMTNV-----VL <b>G</b>       | 4118              |
| SOFTCORAL    | YPKEKINS AKR <b>KL</b> KGENPAEIMKQDLESGHKKAG----YYEMLSV-----LL <b>G</b>       | 4099              |
| PISTILLATA   | YPKQKVQSAWR <b>KL</b> EGFNPAYVMRDDLQLGHSKQS----WYQOMESV-----CL <b>G</b>       | 4125              |
| HEMICHOR     | YAKDRINNARR <b>KL</b> QGANPCHITRDEL KMNMIKK----HYCTGYIDV-----CM <b>G</b>      | 4113              |
| BELCHER      | YPREKIKFAAK <b>KL</b> QGVNPTHITKAELQLGHNLP----WFKSFCLV-----AM <b>G</b>        | 4160              |
| STRONG       | YPKKIKFAK <b>KL</b> QGVNSTYITKAEL EMGPHSKDARDAPFLKALKS-----TC <b>G</b>        | 4133              |
| STARFISH     | YPREKVNFAQ <b>KL</b> EGANPSDITQRELALGHSRNP----AFSAIKEV-----V <b>K</b> G       | 4158              |
|              | :      * * * :      :      *                                                  | *                 |

Supplementary Figure 9: Clustal Omega: DNA-PKcs alignment metazoan plus “putative archaeon”

|              |                                                      | <b>End RYG70459.1 (Archaeon)</b> |
|--------------|------------------------------------------------------|----------------------------------|
| ARCHAEON     | TNAGRTGKMKAAVELTVEEQVDALMAMATDPNVLVRQWVGLQAWL        | 4648                             |
| MUDCRAB      | QNCESARANMDRTGLTIHQQVDILLEQATDPNILGRTWVWGSPI         | 4057                             |
| SCORPION     | DRK-SLRQNLPKNGLSVKQVQKSLIDQATDSGILSRIYFGWDPWF        | 4131                             |
| SPONGE       | DSSTNLRARVGKRCDSVEDQVDCCLIDHATDSNVLGRTYGGWEAWV       | 4157                             |
| CAPITELLA    | DKQADIRARLPADGLSSEEQVAALLNLATDPNILGRTFAGWEPWV        | 4109                             |
| DANIO        | EEQHNIRARLADKDLTVEDQVDCLLDQATDPNILGRVWVGWEPWI        | 4119                             |
| MILII        | DKEHNIRARVPEDGLSVEIQVDCCLIDQATDPNILGRVWVGWEPWM       | 4141                             |
| BAMBOO       | DKDHNVRARESEEGLSVEECQVDCCLIDQATDPNILGRVWVGWEAWM      | 4134                             |
| XENOPUS      | DKKHNRRTNEPPDGLTEETQVQCLIDQATDPNILGRVWVGWEPWI        | 4146                             |
| STERLET      | EKEHNVRAREAPQGLSVEETQVECLIDQATDPNILGRVWVGWESWV       | 4150                             |
| GAR          | EQGVNVRASQAAEGLAVEIQVECLLDQATDPNILGRVVMGWEPWI        | 4147                             |
| LATIMERIA    | DPDHNVRAREVKEDLPVETQVACLIDQATDPNILGRVWVGWEPWM        | 4147                             |
| CAECIL       | DKTHNVRAREPKDGLTEEQVKCLLDQATDPNILGRVWVGWEPWM         | 4143                             |
| SNAKE        | SKQFNIRARQPQDGLAEIQVKCLIDQATDPNILGRTWVGWEPWM         | 4130                             |
| CANARY       | NSNHDIRAKEPEDGLSEETQVRCLIDQATDPNILGRVWVGWEPWM        | 4136                             |
| OSTRICH      | NAAHNTRAKEPEDGLSEETQVKCLIDQATDPNILGRAWVGWEPWM        | 4106                             |
| GECKO        | SKEHNIRAKEAEDGLSEEQVKCLIDQATDSNILGRVWVGWEPWM         | 4146                             |
| TURTLE       | SRDHNIRAKEPEDGLSEEQVRCLLDQATDPNLLGRVWVGWEPWM         | 4144                             |
| ALLIGATOR    | TRDQNIRAKEPEDGLTEETQVKCLIDQATDPNILGRVWVGWESWM        | 4104                             |
| PLATYPUS     | SKDHNVRARQPEEGLSEEQVQCLIDQATDPNILGRTWVGWEPWM         | 4135                             |
| TASDEVIL     | NRDHNFRAQQPDDGLSEETQVKCLMDQATDPNVLGRTWVGWEPWM        | 4140                             |
| <b>HUMAN</b> | <b>SKDHNIRAQEPESGLSEETQVKCLMDQATDPNILGRTWVGWEPWM</b> | <b>4128</b>                      |
| MOUSE        | NRDYNIRAQEPESGLSEETQVKCLVDQATDPNILGRTWVGWEPWM        | 4128                             |
| CRASSO2      | DKRENVRAQLPASGLTVEEQVAALIDQATDPNIVGRVWVGWEPWM        | 4115                             |
| POMACEA      | DVQDNIRARLKEKGLTEEQVAALIDQATDPNILGRAWVGWEPWL         | 4122                             |
| TRICHOPLAX   | DKQYNERARMPADNLSVEDQVTCLIDQATDPNILGRTWQGWEPWM        | 4127                             |
| NEMATOSTELLA | DRRHNVRAQKEENELTSEAQVDCCLIDQATDVNILGRAWVGWEAWV       | 4111                             |
| PRIAPULA     | DPRSDLRAQLPPEGLTVEEQVQCIEQATEPSLLGRTWVWVGWEPWM       | 4163                             |
| SOFTCORAL    | DKQHNQRRARHYV--NTVENQVACLIDQATDPNILGRTYHGWEPWV       | 4142                             |
| PISTILLATA   | DRNANVRAREPESGLSVEEQVSCCLIDQATDANILGRTWQGWEPWV       | 4170                             |
| HEMICHOR     | DKKYSMRTREPATGLSVEKQVACLVDQAIDPNILGRAYEGWEAWV        | 4158                             |
| BELCHER      | DGGKDVRQAQKPAEGLSVEDQVACLIDQATDPNILGRTWQGWQSFM       | 4205                             |
| STRONG       | GNTESKRAQSKSKGLSVEDQVACLIDQATDPRILGKTYQGWEPWV        | 4178                             |
| STARFISH     | DRSQNIRASSPKSGLSVEETQVECLIDQATDPNILGRVYAGWEAWM       | 4203                             |
|              | . ** :: * : :: : : * . . .                           |                                  |
